# Supplementary material for: Enhancing transcriptome analysis in medicinal plants: multiple unigene sets in Astragalus membranaceus
Source: Front Plant Sci. 2024 Feb 7;15:1301526. doi: 10.3389/fpls.2024.1301526 (PMC10879423; doi:10.3389/fpls.2024.1301526)
Supplement: Supplementary file 2 [file Table_1.xlsx]

## Sheet: Table S1
Supplementary Table 1. Statistical results of Illumina-seq from A. membranaceus tissue samples.
*Decontamination represents the result of bacterial sequence trimming.
Sample		Raw sequencing data						Adaptor & quality trimming		*After decontamination
		Sequencing amount	Read No.	Read bases	GC(%)	Q20(%)	Q30(%)	Read No.	%	No. of clean reads	Clean length	%
Leaves	A. membranaceus_L1	3.3G	40092992	6054041792	42.9	97.88	94.58	37063976	0.885639	36650740	5303728734	0.876064
	A. membranaceus_L2	2.8G	33942822	5125366122	42.66	97.92	94.66	31444824	0.895439	31377018	4580081863	0.893611
	A. membranaceus_L3	3.7G	45514562	6872698862	42.83	97.85	94.52	42023464	0.882733	41924484	6053151240	0.880753
Flowers	A. membranaceus_F1	3.1G	37601642	5677847942	43.27	98	94.85	34958560	0.893847	34718478	5040875336	0.887814
	A. membranaceus_F2	3.3G	40148244	6062384844	43.2	97.8	94.42	37049448	0.882761	36933428	5335455291	0.880092
	A. membranaceus_F3	3.4G	41751870	6304532370	43.07	97.84	94.51	38589400	0.887954	38473212	5581939033	0.885385
Roots	A. membranaceus_R1	3.1G	38099512	5753026312	43.71	97.69	94.18	34942722	0.881743	34339422	4985971507	0.866669
	A. membranaceus_R2	3.1G	37664050	5687271550	43.14	97.9	94.63	34879416	0.890188	34690032	5035831663	0.885457
	A. membranaceus_R3	3.6G	43672682	6594574982	43.13	97.56	93.92	39771400	0.87813	39499338	5752120099	0.87225
Stems	A. membranaceus_S1	3.1G	38330438	5787896138	42.79	97.98	94.81	35683892	0.887783	35494198	5111701387	0.883171
	A. membranaceus_S2	3.1G	37387834	5645562934	43.05	98.01	94.85	34805418	0.891515	34629068	5008136019	0.887092
	A. membranaceus_S3	3.1G	38291768	5782056968	43.25	97.96	94.73	35622942	0.887821	35472234	5112239101	0.884156

## Sheet: Table S2
Supplementary Table 2. Statistical results of PacBio-seq.
	Polymerase Read				Subread		Insert		Circular consensus subread (CCS)
Sample	Base	No.	Mean length	N50	Mean length	N50	Mean length	N50	Mean length	High-quality isoforms	Low-quality isoforms	Total
A. membranaceus	45497196751	684582	66815	125871	2087	2264	2989	3137	2326	90374	170	90544

## Sheet: Table S3
Supplementary Table 3. Mapping results of Illumina-seq reads produced from 12 samples.
Sample		Pre-processed Read	Set-1		Set-2		Set-3
			Mapped Read	Mapped Read (%)	Mapped Read	Mapped Read (%)	Mapped Read	Mapped Read (%)
Leaves	A. membranaceus_L1	36650740	25880550	0.7061	28173730	0.7687	27863902	0.7603
	A. membranaceus_L2	31377018	23113098	0.7366	25293838	0.8061	24995566	0.7966
	A. membranaceus_L3	41924484	28909132	0.6896	31412046	0.7493	31112384	0.7421
Flowers	A. membranaceus_F1	34718478	21845760	0.6292	26315842	0.758	26038772	0.75
	A. membranaceus_F2	36933428	25673398	0.6951	28307780	0.7665	27920492	0.756
	A. membranaceus_F3	38473212	27531392	0.7156	30440266	0.7912	30011114	0.7801
Roots	A. membranaceus_R1	34339422	24267522	0.7067	26518694	0.7723	25964004	0.7561
	A. membranaceus_R2	34690032	24919626	0.7184	27011226	0.7786	26598168	0.7667
	A. membranaceus_R3	39499338	29206378	0.7394	32328122	0.8184	31852490	0.8064
Stems	A. membranaceus_S1	35494198	23416418	0.6597	25592778	0.721	25257190	0.7116
	A. membranaceus_S2	34629068	24234626	0.6998	26139742	0.7548	25776982	0.7444
	A. membranaceus_S3	35472234	24202124	0.6823	26150864	0.7372	25798284	0.7273
