# Supplementary material for: Enhancing transcriptome analysis in medicinal plants: multiple unigene sets in Astragalus membranaceus
Source: Front Plant Sci. 2024 Feb 7;15:1301526. doi: 10.3389/fpls.2024.1301526 (PMC10879423; doi:10.3389/fpls.2024.1301526)
Supplement: Supplementary file 3 [file Table_2.xlsx]

## Sheet: Table S4
Supplementary Table 4. Expression information of unigene set-1 (PacBio HQ CCS).
Unigene ID	Unigene length	Annotation description			Average TPM				Roots			Leaves			Flowers			Stems
		NR blast	Araport11	InterPro	Roots	Leaves	Flowers	Stems	R1	R2	R3	L1	L2	L3	F1	F2	F3	S1	S2	S3
Am_HQ_0	11361	XP_004501671.1_E3 ubiquitin-protein ligase UPL1-like isoform X2 [Cicer arietinum]	AT1G55860.1_LOW protein: E3 ubiquitin ligase-like protein, GeneName=UPL1	IPR010314_E3 ubiquitin ligase, domain of unknown function DUF913; IPR015940_Ubiquitin-associated domain; IPR009060_UBA-like superfamily	27.5967	37.3167	32.36	33.5233	31.19	27.29	24.31	36.01	40.42	35.52	20.67	38.67	37.74	27.67	35.27	37.63
Am_HQ_1	9541	XP_004492654.1_BEACH domain-containing protein C2 isoform X1 [Cicer arietinum]	AT2G45540.1_WD-40 repeat family protein / beige-like protein	IPR023362_PH-BEACH domain; IPR001680_WD40 repeat; IPR036322_WD40-repeat-containing domain superfamily; IPR036372_BEACH domain superfamily; IPR000409_BEACH domain	19.36	18.9167	21.5233	22.6833	15.75	24.22	18.11	14.09	22.93	19.73	12.9	26.24	25.43	17.68	20.64	29.73
Am_HQ_2	8439	XP_004504350.1_uncharacterized protein LOC101515132 [Cicer arietinum]	AT4G13750.1_Histidine kinase-, DNA gyrase B-, and HSP90-like ATPase family protein, GeneName=NOV	IPR024975_Protein NO VEIN, C-terminal	10.88	4.53333	4.45	5.08333	11.9	7.43	13.31	4.61	4.53	4.46	2.88	5.46	5.01	4.82	5	5.43
Am_HQ_3	8396	KAG4930220.1_hypothetical protein JHK86_047181 [Glycine max] KAG4943111.1 hypothetical protein JHK85_047757 [Glycine max] KAG5102221.1 hypothetical protein JHK84_047190 [Glycine max]	AT2G26890.1_DNAJ heat shock N-terminal domain-containing protein, GeneName=GRV2	IPR016024_Armadillo-type fold; IPR045802_DnaJ homologue subfamily C, GRV2/DNAJC13, N-terminal domain; IPR001623_DnaJ domain; IPR036869_Chaperone J-domain superfamily; IPR025640_GYF domain 2	24.99	23.1333	20.3633	27.4033	29.15	26.84	18.98	22.62	25.02	21.76	12.91	24.53	23.65	22.8	27.41	32
Am_HQ_4	8276	XP_012569579.1_protein ILITYHIA [Cicer arietinum]	AT1G64790.3_ILITYHIA, GeneName=ILA	IPR016024_Armadillo-type fold; IPR034085_TOG domain	30.5967	27.4733	21.79	41.85	32.44	40.69	18.66	24.67	33.09	24.66	16.96	25.18	23.23	33.55	38.51	53.49
Am_HQ_6	8028	XP_004511695.1_uncharacterized protein LOC101504440 isoform X2 [Cicer arietinum]	AT4G17330.3_G2484-1 protein, GeneName=G2484-1	.	5.67333	6.89	7.34	6.88	5.74	5.63	5.65	7.5	7.02	6.15	8.8	7.15	6.07	7.97	6.72	5.95
Am_HQ_8	8150	XP_020217117.1_serine/threonine-protein kinase TOR [Cajanus cajan]	AT1G50030.1_target of rapamycin, GeneName=TOR	IPR036738_FKBP12-rapamycin binding domain superfamily; IPR016024_Armadillo-type fold; IPR000403_Phosphatidylinositol 3-/4-kinase, catalytic domain; IPR003152_FATC domain; IPR003151_PIK-related kinase, FAT; IPR024585_Domain of unknown function DUF3385, target of rapamycin protein; IPR011990_Tetratricopeptide-like helical domain superfamily; IPR011009_Protein kinase-like domain superfamily; IPR0090…	26.6167	30.7633	22.21	32.6433	27.53	28.33	23.99	29.08	33.69	29.52	10.83	29.73	26.07	26.41	35.07	36.45
Am_HQ_9	8094	XP_045818737.1_uncharacterized protein LOC123911386 [Trifolium pratense] XP_045818738.1 uncharacterized protein LOC123911386 [Trifolium pratense] XP_045818740.1 uncharacterized protein LOC123911386 [Trifolium pratense] XP_045818741.1 uncharacterized protein LOC123911386 [Trifolium pratense]	AT4G17330.3_G2484-1 protein, GeneName=G2484-1	IPR008395_Agenet-like domain; IPR014002_Agenet domain, plant type	22.7067	26.0467	23.0267	28.31	22.74	24.56	20.82	26.29	28.19	23.66	19.92	25.01	24.15	28.18	29.26	27.49
Am_HQ_10	8040	XP_024639852.1_piezo-type mechanosensitive ion channel homolog isoform X1 [Medicago truncatula] XP_024639854.1 piezo-type mechanosensitive ion channel homolog isoform X1 [Medicago truncatula] RHN81200.1 putative Piezo family protein [Medicago truncatula]	AT2G48060.2_piezo-type mechanosensitive ion channel component	.	14.07	18.0767	12.8233	14.18	17.33	13.15	11.73	18.97	18.35	16.91	12.28	13.25	12.94	14.23	14.59	13.72
Am_HQ_11	7917	XP_004487363.1_histone-lysine N-methyltransferase ATXR3-like [Cicer arietinum]	AT4G15180.1_SET domain protein 2, GeneName=SDG2	IPR036047_F-box-like domain superfamily; IPR001214_SET domain; IPR045606_Protein SET DOMAIN GROUP 2, C-terminal	20.11	28.75	19.27	22.4667	15.57	19.23	25.53	26.86	31.95	27.44	13.05	23.94	20.82	19.96	22.63	24.81
Am_HQ_12	7878	XP_004509208.1_uncharacterized protein LOC101497795 [Cicer arietinum]	AT3G50370.2_hypothetical protein	.	88.3467	52.3	43.8267	58.2633	115.69	70.93	78.42	52	54.45	50.45	33	50.5	47.98	51.02	58.41	65.36
Am_HQ_15	7860	XP_027338978.1_glutamate synthase [NADH], amyloplastic isoform X1 [Abrus precatorius]	AT5G53460.1_NADH-dependent glutamate synthase 1, GeneName=GLT1	IPR002932_Glutamate synthase domain; IPR036485_Glutamate synthase, alpha subunit, C-terminal domain superfamily; IPR017932_Glutamine amidotransferase type 2 domain; IPR029055_Nucleophile aminohydrolases, N-terminal; IPR002489_Glutamate synthase, alpha subunit, C-terminal; IPR036188_FAD/NAD(P)-binding domain superfamily; IPR028261_Dihydroprymidine dehydrogenase domain II; IPR023753_FAD/NAD(P)-bind…	42.6133	15.47	27.2867	23.9167	48.15	58.06	21.63	14.16	19.06	13.19	12.6	44.51	24.75	20.34	37.18	14.23
Am_HQ_16	7840	XP_027348820.1_mediator of RNA polymerase II transcription subunit 12-like isoform X1 [Abrus precatorius]	AT4G00450.2_RNA polymerase II transcription mediator, GeneName=CCT	IPR019035_Mediator complex, subunit Med12	5.35667	8.41667	6.57333	7.78333	5.24	5.67	5.16	7.68	9.77	7.8	4.95	7.19	7.58	6.36	8.45	8.54
Am_HQ_17	7767	XP_004510784.1_mediator of RNA polymerase II transcription subunit 12 [Cicer arietinum] XP_012574178.1 mediator of RNA polymerase II transcription subunit 12 [Cicer arietinum]	AT4G00450.2_RNA polymerase II transcription mediator, GeneName=CCT	IPR019035_Mediator complex, subunit Med12	18.9167	12.89	10.7	12.3233	22.51	13.2	21.04	11.06	14.54	13.07	6.74	12.38	12.98	10.7	13.74	12.53
Am_HQ_21	7684	XP_004487086.2_helicase protein MOM1-like isoform X1 [Cicer arietinum]	AT1G08060.1_ATP-dependent helicase family protein, GeneName=MOM	IPR027417_P-loop containing nucleoside triphosphate hydrolase; IPR016197_Chromo-like domain superfamily; IPR000953_Chromo/chromo shadow domain; IPR000330_SNF2, N-terminal; IPR001965_Zinc finger, PHD-type; IPR011011_Zinc finger, FYVE/PHD-type; IPR001650_Helicase, C-terminal	4.79333	10.29	15.7167	14.9767	3.52	8.08	2.78	9.08	12.24	9.55	12.51	18.12	16.52	11.83	14.49	18.61
Am_HQ_23	7523	XP_012571943.1_MAG2-interacting protein 2 [Cicer arietinum]	AT5G24350.2_neuroblastoma-amplified sequence protein	IPR013244_Sec39 domain	8.20667	4.22667	3.61	5.87	10.34	6.74	7.54	4.41	4.66	3.61	3.31	3.82	3.7	4.94	5.75	6.92
Am_HQ_26	7488	RDX69529.1_hypothetical protein CR513_51341, partial [Mucuna pruriens]	AT5G53460.1_NADH-dependent glutamate synthase 1, GeneName=GLT1	IPR029055_Nucleophile aminohydrolases, N-terminal; IPR036188_FAD/NAD(P)-binding domain superfamily; IPR002489_Glutamate synthase, alpha subunit, C-terminal; IPR002932_Glutamate synthase domain; IPR036485_Glutamate synthase, alpha subunit, C-terminal domain superfamily; IPR028261_Dihydroprymidine dehydrogenase domain II; IPR017932_Glutamine amidotransferase type 2 domain; IPR006982_Glutamate synth…	312.923	39.1533	82.4533	41.9567	454.11	291.61	193.05	38.29	54.02	25.15	77.72	122.21	47.43	44.69	56.67	24.51
Am_HQ_27	7555	XP_045806965.1_pre-mRNA-processing-splicing factor 8A isoform X2 [Trifolium pratense]	AT1G80070.1_Pre-mRNA-processing-splicing factor, GeneName=SUS2	IPR012337_Ribonuclease H-like superfamily; IPR000555_JAB1/MPN/MOV34 metalloenzyme domain; IPR019582_RNA recognition motif, spliceosomal PrP8; IPR021983_PRP8 domain IV core; IPR012591_PRO8NT domain; IPR019581_Pre-mRNA-processing-splicing factor 8, U5-snRNA-binding; IPR019580_Pre-mRNA-processing-splicing factor 8, U6-snRNA-binding; IPR012984_PROCT domain; IPR012592_PROCN domain	92.6733	88.72	63.4467	106.993	100.6	94.55	82.87	83.81	101.69	80.66	38.01	76.45	75.88	79.58	107.03	134.37
Am_HQ_28	7518	PNY01932.1_disease resistance protein (TIR-NBS-LRR class) [Trifolium pratense]	AT5G36930.3_Disease resistance protein (TIR-NBS-LRR class) family	IPR000157_Toll/interleukin-1 receptor homology (TIR) domain; IPR002182_NB-ARC; IPR035897_Toll/interleukin-1 receptor homology (TIR) domain superfamily; IPR027417_P-loop containing nucleoside triphosphate hydrolase	5.90333	9.10333	5.87333	9.46667	6.94	6.87	3.9	7.99	11.78	7.54	3.01	8.42	6.19	7.89	10.59	9.92
Am_HQ_29	7529	XP_012570649.1_glutamate synthase [NADH], amyloplastic isoform X1 [Cicer arietinum]	AT5G53460.1_NADH-dependent glutamate synthase 1, GeneName=GLT1	IPR006982_Glutamate synthase, central-N; IPR017932_Glutamine amidotransferase type 2 domain; IPR029055_Nucleophile aminohydrolases, N-terminal	51.0233	6.41333	12.4233	7.75333	59.89	35.98	57.2	2.74	5.38	11.12	1.91	13.35	22.01	4	5.94	13.32
Am_HQ_30	7526	XP_020229896.1_acetyl-CoA carboxylase 1 [Cajanus cajan]	AT1G36160.2_acetyl-CoA carboxylase 1, GeneName=ACC1	IPR011053_Single hybrid motif; IPR029045_ClpP/crotonase-like domain superfamily; IPR000089_Biotin/lipoyl attachment; IPR011054_Rudiment single hybrid motif; IPR034733_Acetyl-CoA carboxylase; IPR013537_Acetyl-CoA carboxylase, central domain	61.6733	77.1433	53.8433	63.1	57.78	73.23	54.01	75.32	75.7	80.41	34.35	58.04	69.14	53.39	63.86	72.05
Am_HQ_32	7514	XP_027337807.1_CCR4-NOT transcription complex subunit 1 [Abrus precatorius]	AT1G02080.1_transcription regulator	IPR032191_CCR4-NOT transcription complex subunit 1, CAF1-binding domain; IPR007196_CCR4-Not complex component, Not1, C-terminal; IPR024557_CCR4-NOT transcription complex subunit 1, domain 4; IPR032193_CCR4-NOT transcription complex subunit 1, TTP binding domain	23.06	19.87	19.2433	21.5267	26.57	23.39	19.22	19.04	20.41	20.16	15.81	22.43	19.49	19.39	20.92	24.27
Am_HQ_35	7582	XP_012571943.1_MAG2-interacting protein 2 [Cicer arietinum]	AT5G24350.2_neuroblastoma-amplified sequence protein	IPR013244_Sec39 domain	4.36333	4.11333	3.79667	5.56667	4.04	5.01	4.04	3.94	4.34	4.06	3.11	4.19	4.09	4.3	5.6	6.8
Am_HQ_37	7456	XP_012570649.1_glutamate synthase [NADH], amyloplastic isoform X1 [Cicer arietinum]	AT5G53460.1_NADH-dependent glutamate synthase 1, GeneName=GLT1	IPR017932_Glutamine amidotransferase type 2 domain; IPR029055_Nucleophile aminohydrolases, N-terminal	209.04	27.2933	64.47	34.2667	208.06	121.65	297.41	14.06	22.46	45.36	47.76	54.98	90.67	24.53	32.89	45.38
Am_HQ_40	7355	XP_004492763.1_ATP-dependent helicase BRM-like [Cicer arietinum]	AT2G46020.3_transcription regulatory protein SNF2, GeneName=BRM	IPR001650_Helicase, C-terminal; IPR000330_SNF2, N-terminal; IPR027417_P-loop containing nucleoside triphosphate hydrolase; IPR014978_Glutamine-Leucine-Glutamine, QLQ; IPR014001_Helicase superfamily 1/2, ATP-binding domain; IPR036427_Bromodomain-like superfamily; IPR001487_Bromodomain	22.19	36.49	29.84	33.51	18.92	27.37	20.28	34.36	39.76	35.35	21.62	34.88	33.02	25.46	36.72	38.35
Am_HQ_41	7379	XP_027330727.1_E3 ubiquitin-protein ligase UPL2-like [Abrus precatorius] XP_027330728.1 E3 ubiquitin-protein ligase UPL2-like [Abrus precatorius] XP_027330729.1 E3 ubiquitin-protein ligase UPL2-like [Abrus precatorius]	AT1G55860.1_LOW protein: E3 ubiquitin ligase-like protein, GeneName=UPL1	.	71.8	57.7167	45.6333	55.4	80.71	75.16	59.53	54.19	62.05	56.91	29.86	57.1	49.94	49.22	57.2	59.78
Am_HQ_42	7287	XP_045821861.1_protein TIC236, chloroplastic-like [Trifolium pratense]	AT2G25660.2_embryo defective 2410, GeneName=emb2410	IPR007452_Translocation and assembly module TamB	9.89333	23.7533	11.0967	13.3733	11.2	9.65	8.83	25.42	21.25	24.59	6.47	12.9	13.92	12.01	12.92	15.19
Am_HQ_44	7342	XP_027337807.1_CCR4-NOT transcription complex subunit 1 [Abrus precatorius]	AT1G02080.2_transcription regulator	IPR032191_CCR4-NOT transcription complex subunit 1, CAF1-binding domain; IPR007196_CCR4-Not complex component, Not1, C-terminal; IPR032194_CCR4-NOT transcription complex subunit 1, HEAT repeat; IPR032193_CCR4-NOT transcription complex subunit 1, TTP binding domain; IPR024557_CCR4-NOT transcription complex subunit 1, domain 4	18.8233	14.08	10.2733	12.96	19.69	17.55	19.23	12.02	16.59	13.63	7.88	10.27	12.67	10.05	12.3	16.53
Am_HQ_45	7346	XP_004502452.1_protein CELLULOSE SYNTHASE INTERACTIVE 1 isoform X1 [Cicer arietinum]	AT2G22125.1_binding protein, GeneName=CSI1	IPR000225_Armadillo; IPR016024_Armadillo-type fold; IPR000008_C2 domain; IPR035892_C2 domain superfamily	12.94	10.3167	16.15	21.5633	7.6	18.72	12.5	7.54	12.88	10.53	14.38	17.33	16.74	20.75	20.29	23.65
Am_HQ_46	7352	TKY50406.1_Methyl-CpG-binding domain-containing protein 9 [Spatholobus suberectus]	AT3G01460.1_methyl-CPG-binding domain 9, GeneName=MBD9	IPR011011_Zinc finger, FYVE/PHD-type; IPR016177_DNA-binding domain superfamily; IPR028942_WHIM1 domain; IPR001739_Methyl-CpG DNA binding; IPR019787_Zinc finger, PHD-finger; IPR001965_Zinc finger, PHD-type; IPR001487_Bromodomain; IPR036427_Bromodomain-like superfamily	12.9233	4.44667	5.83333	6.96333	17.16	9.23	12.38	4.56	4.6	4.18	3.92	7.09	6.49	5.14	8.23	7.52
Am_HQ_47	7331	XP_004499218.1_lysine-specific histone demethylase 1 homolog 3 isoform X1 [Cicer arietinum] XP_004499221.1 lysine-specific histone demethylase 1 homolog 3 isoform X1 [Cicer arietinum] XP_012570825.1 lysine-specific histone demethylase 1 homolog 3 isoform X1 [Cicer arietinum] XP_027189607.1 lysine-specific histone demethylase 1 homolog 3 isoform X1 [Cicer arietinum]	AT4G16310.3_LSD1-like 3, GeneName=LDL3	IPR036188_FAD/NAD(P)-binding domain superfamily; IPR007526_SWIRM domain; IPR035441_TFIIS/LEDGF domain superfamily; IPR002937_Amine oxidase; IPR009057_Homeobox-like domain superfamily	20.15	16.34	9.69333	13.2433	30.74	15.1	14.61	14.99	18.05	15.98	5.73	11.68	11.67	11.76	14.22	13.75
Am_HQ_50	7310	XP_027346143.1_calpain-type cysteine protease DEK1 [Abrus precatorius]	AT1G55350.4_calpain-type cysteine protease family, GeneName=DEK1	IPR022682_Peptidase C2, calpain, large subunit, domain III; IPR036213_Calpain large subunit, domain III superfamily; IPR038765_Papain-like cysteine peptidase superfamily; IPR001300_Peptidase C2, calpain, catalytic domain; IPR022683_Peptidase C2, calpain, domain III; IPR013320_Concanavalin A-like lectin/glucanase domain superfamily; IPR022684_Peptidase C2, calpain family	8.74667	12.1533	8.20333	11.4633	9.62	9.69	6.93	12.35	12.16	11.95	5.96	9.07	9.58	9.93	11.45	13.01
Am_HQ_51	7239	TKY63934.1_ATP-dependent helicase BRM [Spatholobus suberectus]	AT2G46020.3_transcription regulatory protein SNF2, GeneName=BRM	IPR001487_Bromodomain; IPR014978_Glutamine-Leucine-Glutamine, QLQ; IPR027417_P-loop containing nucleoside triphosphate hydrolase; IPR036427_Bromodomain-like superfamily; IPR001650_Helicase, C-terminal; IPR000330_SNF2, N-terminal; IPR014001_Helicase superfamily 1/2, ATP-binding domain	7.03333	11.1133	5.45667	12.3967	5.92	8.2	6.98	11.02	11.07	11.25	4.08	6.56	5.73	12.03	12.47	12.69
Am_HQ_52	7249	QDM38910.1_UDP-glycosyltransferase UGT72X5 [Glycyrrhiza uralensis]	AT4G01070.1_UDP-Glycosyltransferase superfamily protein, GeneName=GT72B1	IPR002213_UDP-glucuronosyl/UDP-glucosyltransferase	36.46	21.7233	55.8167	10.7533	61.01	22.93	25.44	16.82	21.23	27.12	22.76	70.31	74.38	8.4	11.76	12.1
Am_HQ_53	7198	XP_004488845.1_DExH-box ATP-dependent RNA helicase DExH12 [Cicer arietinum] XP_004488846.1 DExH-box ATP-dependent RNA helicase DExH12 [Cicer arietinum]	AT1G20960.1_U5 small nuclear ribonucleoprotein helicase, GeneName=emb1507	IPR001650_Helicase, C-terminal; IPR004179_Sec63 domain; IPR011545_DEAD/DEAH box helicase domain; IPR027417_P-loop containing nucleoside triphosphate hydrolase; IPR014756_Immunoglobulin E-set; IPR041094_Brr2, N-terminal helicase PWI domain; IPR036390_Winged helix DNA-binding domain superfamily; IPR003593_AAA+ ATPase domain; IPR014001_Helicase superfamily 1/2, ATP-binding domain	44.03	32.1667	31.9267	33.59	62.39	41.73	27.97	32.15	37	27.35	22.67	41.99	31.12	26.98	36.21	37.58
Am_HQ_55	7166	XP_004489387.1_thyroid adenoma-associated protein homolog isoform X1 [Cicer arietinum]	AT3G55160.3_thyroid adenoma-associated-like protein	IPR019442_THADA/TRM732, DUF2428; IPR016024_Armadillo-type fold	3.09	4.06667	3.19	4.30333	3.17	3.61	2.49	3.88	4.44	3.88	2.43	3.75	3.39	3.23	4.53	5.15
Am_HQ_59	7174	TKY59131.1_Phragmoplast orienting kinesin 2 [Spatholobus suberectus]	AT3G19050.1_phragmoplast orienting kinesin 2, GeneName=POK2	IPR001752_Kinesin motor domain; IPR027417_P-loop containing nucleoside triphosphate hydrolase	0.00333333	0.29	1.29333	1.06333	0	0	0.01	0.21	0.46	0.2	0.69	1.27	1.92	0.63	0.57	1.99
Am_HQ_60	7098	TKY60321.1_U-box domain-containing protein 13 [Spatholobus suberectus]	AT2G22125.1_binding protein, GeneName=CSI1	IPR016024_Armadillo-type fold; IPR035892_C2 domain superfamily; IPR000225_Armadillo; IPR000008_C2 domain	6.71667	6.34667	10.61	11.8433	6.84	5.83	7.48	4.89	7.73	6.42	9	12.09	10.74	10.49	9.95	15.09
Am_HQ_64	7080	XP_012570366.1_protein ROS1-like [Cicer arietinum]	AT2G36490.1_demeter-like 1, GeneName=DML1	IPR028925_Demeter, RRM-fold domain; IPR003651_Endonuclease III-like, iron-sulphur cluster loop motif; IPR028924_Permuted single zf-CXXC unit; IPR011257_DNA glycosylase; IPR003265_HhH-GPD domain	5.60333	10.8867	28.9267	15.03	5.39	5.92	5.5	5.8	17.9	8.96	22.2	34.96	29.62	12.77	16.25	16.07
Am_HQ_66	7063	XP_013444493.1_1-phosphatidylinositol-3-phosphate 5-kinase FAB1B [Medicago truncatula] KEH18518.1 1-phosphatidylinositol-3-phosphate 5-kinase [Medicago truncatula] RHN39562.1 putative 1-phosphatidylinositol-3-phosphate 5-kinase chromatin regulator PHD family [Medicago truncatula]	AT3G14270.2_phosphatidylinositol-4-phosphate 5-kinase family protein, GeneName=FAB1B	IPR002423_Chaperonin Cpn60/GroEL/TCP-1 family; IPR002498_Phosphatidylinositol-4-phosphate 5-kinase, core; IPR000306_FYVE zinc finger; IPR027409_GroEL-like apical domain superfamily; IPR011011_Zinc finger, FYVE/PHD-type	32.74	34.1433	27.6667	29.5233	18.87	37.15	42.2	31.62	34.7	36.11	19.39	30.9	32.71	32.4	27.44	28.73
Am_HQ_71	6966	XP_004492351.1_E3 ubiquitin-protein ligase PRT6 [Cicer arietinum] XP_004492352.1 E3 ubiquitin-protein ligase PRT6 [Cicer arietinum]	AT5G02310.1_proteolysis 6, GeneName=PRT6	IPR044046_E3 ubiquitin-protein ligase UBR-like, C-terminal; IPR003126_Zinc finger, UBR-type; IPR036390_Winged helix DNA-binding domain superfamily	24.7167	31.8467	26.0567	35.1667	23.06	30.76	20.33	29.89	34.67	30.98	15.86	31.35	30.96	29.95	36.69	38.86
Am_HQ_72	6971	XP_004489757.1_inactive poly [ADP-ribose] polymerase RCD1-like [Cicer arietinum]	AT1G32230.3_WWE protein-protein interaction domain protein family, GeneName=RCD1	IPR004170_WWE domain; IPR037197_WWE domain superfamily	0.213333	0.726667	0.593333	0.726667	0.09	0.47	0.08	0.19	0.77	1.22	0.71	0.42	0.65	1.06	0.49	0.63
Am_HQ_77	6907	XP_045827657.1_TATA-binding protein-associated factor BTAF1 isoform X2 [Trifolium pratense]	AT3G54280.1_ROOT GROWTH DEFECTIVE 3, GeneName=RGD3	IPR001650_Helicase, C-terminal; IPR027417_P-loop containing nucleoside triphosphate hydrolase; IPR022707_Mot1, central domain; IPR016024_Armadillo-type fold; IPR014001_Helicase superfamily 1/2, ATP-binding domain; IPR000330_SNF2, N-terminal	10.6933	15.9767	12.5	16.1467	10.71	12.11	9.26	16.06	17.35	14.52	8.36	14.86	14.28	14.14	14.48	19.82
Am_HQ_78	6903	XP_040870419.1_uncharacterized protein LOC100786119 [Glycine max] KAG4393490.1 hypothetical protein GLYMA_03G099800v4 [Glycine max]	.	IPR008979_Galactose-binding-like domain superfamily	57.99	17.9667	12.2067	21.0567	85.6	46.54	41.83	17.22	19.48	17.2	8.94	12.96	14.72	18.47	21.24	23.46
Am_HQ_79	6904	XP_045790297.1_uncharacterized protein LOC123885108 isoform X2 [Trifolium pratense] XP_045790300.1 uncharacterized protein LOC123885108 isoform X2 [Trifolium pratense]	AT4G17330.3_G2484-1 protein, GeneName=G2484-1	IPR008395_Agenet-like domain; IPR014002_Agenet domain, plant type	26.69	18.6767	13.0333	19.1633	36.01	25.19	18.87	18.85	19.68	17.5	10.62	13.84	14.64	18.48	19.77	19.24
Am_HQ_81	6888	XP_013451145.1_protein furry homolog [Medicago truncatula] KEH25185.1 armadillo/beta-catenin-like repeat protein [Medicago truncatula] RHN50294.1 putative Cell morphogenesis protein [Medicago truncatula]	AT5G15680.1_ARM repeat superfamily protein	IPR016024_Armadillo-type fold; IPR025614_Cell morphogenesis protein N-terminal; IPR025481_Cell morphogenesis protein C-terminal; IPR029473_Cell morphogenesis central region	32.13	20.9567	22.3833	23.9067	36.46	22.48	37.45	19.71	22.67	20.49	18.26	25.23	23.66	19.79	27.91	24.02
Am_HQ_83	6711	XP_012574252.1_DNA-directed RNA polymerase V subunit 1 isoform X2 [Cicer arietinum]	AT2G40030.1_nuclear RNA polymerase D1B, GeneName=NRPD1B	IPR000722_RNA polymerase, alpha subunit; IPR007080_RNA polymerase Rpb1, domain 1; IPR007081_RNA polymerase Rpb1, domain 5; IPR006592_RNA polymerase, N-terminal; IPR007066_RNA polymerase Rpb1, domain 3	0.566667	2.32	3.20667	6.29	0.26	1.14	0.3	1.35	3.82	1.79	1.7	3.91	4.01	3.97	5.28	9.62
Am_HQ_87	6842	XP_004505684.1_uncharacterized protein LOC101490411 isoform X1 [Cicer arietinum] XP_012572708.1 uncharacterized protein LOC101490411 isoform X1 [Cicer arietinum] XP_027191168.1 uncharacterized protein LOC101490411 isoform X1 [Cicer arietinum]	AT4G30150.2_Urb2/Npa2 family protein	IPR018849_Nucleolar 27S pre-rRNA processing, Urb2/Npa2, C-terminal	15.9867	14.2267	10.3233	17.8367	24.07	15.23	8.66	14.49	15.94	12.25	8.98	11	10.99	16.57	17.92	19.02
Am_HQ_89	6825	XP_012573633.1_uncharacterized protein LOC101512775 isoform X2 [Cicer arietinum]	AT4G17330.1_G2484-1 protein, GeneName=G2484-1	IPR008395_Agenet-like domain; IPR014002_Agenet domain, plant type	14.1733	11.1667	7.69667	11.67	20.96	12.97	8.59	10.61	12.16	10.73	4.46	9.71	8.92	11.04	10.47	13.5
Am_HQ_91	6815	XP_045827657.1_TATA-binding protein-associated factor BTAF1 isoform X2 [Trifolium pratense]	AT3G54280.1_ROOT GROWTH DEFECTIVE 3, GeneName=RGD3	IPR001650_Helicase, C-terminal; IPR000330_SNF2, N-terminal; IPR027417_P-loop containing nucleoside triphosphate hydrolase; IPR016024_Armadillo-type fold; IPR014001_Helicase superfamily 1/2, ATP-binding domain; IPR022707_Mot1, central domain	0	0.533333	0.266667	0	0	0	0	0.65	0	0.95	0.8	0	0	0	0	0
Am_HQ_96	6624	XP_004513807.1_DExH-box ATP-dependent RNA helicase DExH14 isoform X1 [Cicer arietinum]	AT5G61140.2_U5 small nuclear ribonucleoprotein helicase	IPR004179_Sec63 domain; IPR011545_DEAD/DEAH box helicase domain; IPR027417_P-loop containing nucleoside triphosphate hydrolase; IPR001650_Helicase, C-terminal; IPR014001_Helicase superfamily 1/2, ATP-binding domain; IPR036390_Winged helix DNA-binding domain superfamily; IPR014756_Immunoglobulin E-set; IPR003593_AAA+ ATPase domain	10.4333	21.2467	21.2167	25.9067	6.28	19	6.02	19.7	24.56	19.48	20.01	20.17	23.47	22.17	23.9	31.65
Am_HQ_97	6718	XP_004514690.1_glutathione reductase, cytosolic [Cicer arietinum]	AT3G24170.1_glutathione-disulfide reductase, GeneName=GR1	IPR023753_FAD/NAD(P)-binding domain; IPR016156_FAD/NAD-linked reductase, dimerisation domain superfamily; IPR036188_FAD/NAD(P)-binding domain superfamily	0.88	0.613333	0.53	0.346667	0.65	1.19	0.8	0.64	0.72	0.48	0.34	0.56	0.69	0.3	0.17	0.57
Am_HQ_99	6696	XP_004496233.1_protein MOR1 isoform X1 [Cicer arietinum]	AT2G35630.1_ARM repeat superfamily protein, GeneName=MOR1	IPR016024_Armadillo-type fold; IPR034085_TOG domain; IPR024395_CLASP N-terminal domain	22.7467	16.2167	21.0067	20.9767	21.27	17.71	29.26	12.74	20.62	15.29	19.5	22.03	21.49	16.75	19.09	27.09
Am_HQ_100	6630	GAU48076.1_hypothetical protein TSUD_81360 [Trifolium subterraneum]	AT5G40390.1_Raffinose synthase family protein, GeneName=SIP1	IPR043502_DNA/RNA polymerase superfamily; IPR000477_Reverse transcriptase domain; IPR005162_Retrotransposon gag domain	11.8867	14.76	8.89333	8.84333	9.87	7.69	18.1	11.97	20.3	12.01	3.94	11.64	11.1	6.12	12.68	7.73
Am_HQ_101	6693	XP_045786169.1_uncharacterized protein At3g06530 isoform X2 [Trifolium pratense]	AT3G06530.5_ARM repeat superfamily protein	IPR012954_BP28, C-terminal domain; IPR016024_Armadillo-type fold; IPR022125_U3 small nucleolar RNA-associated protein 10, N-terminal	7.34	13.46	9.34333	18.51	9.54	9.74	2.74	12.22	15.85	12.31	6.89	10.41	10.73	13.49	17.23	24.81
Am_HQ_104	6672	XP_027368943.1_uncharacterized protein LOC113874891 isoform X2 [Abrus precatorius]	AT1G21580.1_Zinc finger C-x8-C-x5-C-x3-H type family protein	.	8.45333	6.53333	3.38667	4.70667	16.42	6.76	2.18	8.39	9.23	1.98	2.33	6.69	1.14	6.03	6.82	1.27
Am_HQ_105	6572	XP_004485835.1_homeobox-DDT domain protein RLT1 [Cicer arietinum]	AT1G28420.1_homeobox-1, GeneName=HB-1	IPR028942_WHIM1 domain; IPR018501_DDT domain; IPR007759_ASXL, HARE-HTH domain; IPR001356_Homeobox domain; IPR028941_WHIM2 domain; IPR009057_Homeobox-like domain superfamily	46.0433	49.93	41.01	50.3867	52.87	47.97	37.29	48.81	53.31	47.67	37.68	46.13	39.22	52.66	48.58	49.92
Am_HQ_106	6639	QUO98212.1_cytochrome c oxidase subunit 1 [Dalbergia odorifera]	ATMG01360.1_cytochrome oxidase, GeneName=COX1	IPR014241_Cytochrome c oxidase, subunit I bacterial type; IPR000883_Cytochrome c oxidase subunit I; IPR036927_Cytochrome c oxidase-like, subunit I superfamily	0.56	1.13333	1.14	0.976667	0.78	0.6	0.3	2.36	0.41	0.63	2.31	0.56	0.55	1.83	0.37	0.73
Am_HQ_107	6593	XP_045826463.1_uncharacterized protein LOC123918448 isoform X1 [Trifolium pratense] XP_045826464.1 uncharacterized protein LOC123918448 isoform X2 [Trifolium pratense]	AT4G27190.1_NB-ARC domain-containing disease resistance protein	IPR027417_P-loop containing nucleoside triphosphate hydrolase; IPR002182_NB-ARC	6.66667	7.82667	11.9533	16.9333	4.93	8.69	6.38	6.84	10.37	6.27	10.15	14.62	11.09	13.53	15.92	21.35
Am_HQ_108	6615	QKX95871.1_ORF1 [Fusarium graminearum dsRNA mycovirus-1]	.	IPR001650_Helicase, C-terminal; IPR027417_P-loop containing nucleoside triphosphate hydrolase; IPR011545_DEAD/DEAH box helicase domain; IPR014001_Helicase superfamily 1/2, ATP-binding domain	0.323333	0.08	3.09667	0.146667	0.02	0.58	0.37	0.08	0.09	0.07	4.48	4.72	0.09	0.07	0.35	0.02
Am_HQ_109	6616	XP_004505205.1_autophagy-related protein 2 isoform X1 [Cicer arietinum] XP_004505206.1 autophagy-related protein 2 isoform X1 [Cicer arietinum]	AT3G19190.1_autophagy 2, GeneName=ATG2	IPR026885_Autophagy-related protein 2, CAD motif; IPR026854_Vacuolar protein sorting-associated protein 13-like, N-terminal domain	26.3767	19.0667	18.2	15.5933	23.75	25.88	29.5	17.13	18.81	21.26	9.89	23.1	21.61	14.75	17.54	14.49
Am_HQ_111	6615	XP_045826463.1_uncharacterized protein LOC123918448 isoform X1 [Trifolium pratense] XP_045826464.1 uncharacterized protein LOC123918448 isoform X2 [Trifolium pratense]	AT4G27190.1_NB-ARC domain-containing disease resistance protein	IPR027417_P-loop containing nucleoside triphosphate hydrolase; IPR002182_NB-ARC	1.02333	1.67	1.95	3.18333	0.69	1.77	0.61	1.26	2.55	1.2	1.22	2.37	2.26	2.03	2.71	4.81
Am_HQ_112	6458	XP_004494344.1_uncharacterized protein LOC101503823 isoform X1 [Cicer arietinum] XP_004494345.1 uncharacterized protein LOC101503823 isoform X1 [Cicer arietinum] XP_004494346.1 uncharacterized protein LOC101503823 isoform X1 [Cicer arietinum] XP_012569589.1 uncharacterized protein LOC101503823 isoform X1 [Cicer arietinum]	AT3G62900.2_CW-type Zinc Finger	.	26.2333	18.55	10.3633	18.88	20.65	36.87	21.18	19.46	19.51	16.68	5.49	13.1	12.5	19.28	18.17	19.19
Am_HQ_114	6564	XP_004500823.1_phosphatidylinositol 4-kinase alpha 1 isoform X2 [Cicer arietinum]	AT1G49340.1_Phosphatidylinositol 3- and 4-kinase family protein, GeneName=ATPI4K ALPHA	IPR001263_Phosphoinositide 3-kinase, accessory (PIK) domain; IPR011009_Protein kinase-like domain superfamily; IPR016024_Armadillo-type fold; IPR045495_PI4-kinase, N-terminal; IPR000403_Phosphatidylinositol 3-/4-kinase, catalytic domain	6.01333	15.7067	17.87	18.49	4.98	9.92	3.14	11.76	18.96	16.4	13.72	20.42	19.47	13.29	17.29	24.89
Am_HQ_117	6468	TKY47855.1_Mediator of RNA polymerase II transcription subunit 13 [Spatholobus suberectus]	AT1G55325.2_RNA polymerase II transcription mediator, GeneName=GCT	IPR041285_MID domain of medPIWI; IPR021643_Mediator complex, subunit Med13, N-terminal	9.06333	16.1867	13.6967	15.5033	11.97	7.91	7.31	16.27	17.71	14.58	9.21	16.32	15.56	11.7	17.29	17.52
Am_HQ_122	6429	MCH79271.1_callose synthase 2-like [Trifolium medium]	AT1G05570.2_callose synthase 1, GeneName=CALS1	IPR003440_Glycosyl transferase, family 48	32.4367	40.8467	29.45	69.7867	24.99	53.66	18.66	36.09	47.11	39.34	15.75	35.17	37.43	61.42	71.96	75.98
Am_HQ_123	6515	XP_027189406.1_uncharacterized protein At1g21580 [Cicer arietinum]	AT1G21580.1_Zinc finger C-x8-C-x5-C-x3-H type family protein	IPR000571_Zinc finger, CCCH-type	38.8533	32.5633	20.6367	20.2133	53.5	25.21	37.85	30.91	31.24	35.54	14.59	21.68	25.64	18.15	19.2	23.29
Am_HQ_124	6494	TKY49466.1_Nuclear-pore anchor [Spatholobus suberectus]	AT1G79280.1_nuclear pore anchor, GeneName=NUA	IPR012929_Nucleoprotein TPR/MLP1	20.91	22.3	13.13	21.5533	26.13	21.89	14.71	23.77	24.7	18.43	6.01	17.45	15.93	14.73	22.85	27.08
Am_HQ_125	6418	XP_012573351.1_uncharacterized protein LOC101488675 [Cicer arietinum]	AT1G48090.2_calcium-dependent lipid-binding family protein	.	30.7033	30.0367	25.7033	38.7167	29.51	45.95	16.65	26.85	40.31	22.95	16.94	34.61	25.56	35.06	50.22	30.87
Am_HQ_126	6475	XP_003540876.3_E3 ubiquitin-protein ligase UPL3-like [Glycine max] KAG4985083.1 hypothetical protein JHK86_032774 [Glycine max] KAG5118263.1 hypothetical protein JHK82_032683 [Glycine max] KAH1141380.1 hypothetical protein GYH30_032564 [Glycine max] KAH1220031.1 E3 ubiquitin-protein ligase UPL3 [Glycine max] KRH24307.2 hypothetical protein GLYMA_12G032500v4 [Glycine max]	AT4G38600.1_HECT ubiquitin protein ligase family protein KAK, GeneName=KAK	IPR016024_Armadillo-type fold; IPR000569_HECT domain; IPR035983_HECT, E3 ligase catalytic domain; IPR000225_Armadillo	76.78	75.1733	66.6767	66.55	83.07	60.93	86.34	70.9	82.32	72.3	43.51	81.1	75.42	52.56	69.32	77.77
Am_HQ_129	6461	TKY73152.1_TSS protein [Spatholobus suberectus]	AT4G28080.1_Tetratricopeptide repeat (TPR)-like superfamily protein	IPR033646_CLU central domain; IPR011990_Tetratricopeptide-like helical domain superfamily; IPR019734_Tetratricopeptide repeat; IPR028275_Clustered mitochondria protein, N-terminal	3.72	49.3833	22.3667	8.86667	4.83	3.86	2.47	52.76	47.61	47.78	17.29	24.54	25.27	8.56	7.56	10.48
Am_HQ_130	6461	XP_004490684.1_E3 ubiquitin-protein ligase listerin isoform X1 [Cicer arietinum]	AT5G58410.2_HEAT/U-box domain-containing protein	IPR001841_Zinc finger, RING-type; IPR011016_Zinc finger, RING-CH-type; IPR016024_Armadillo-type fold	26.42	12.6433	10.7767	12.7433	30.53	21.28	27.45	11.7	14.31	11.92	7.37	12.11	12.85	11.79	11.57	14.87
Am_HQ_131	6463	XP_027354387.1_DDB1- and CUL4-associated factor homolog 1 isoform X1 [Abrus precatorius]	AT4G31160.1_DDB1-CUL4 associated factor 1, GeneName=DCAF1	IPR016024_Armadillo-type fold; IPR001680_WD40 repeat; IPR006594_LIS1 homology motif; IPR036322_WD40-repeat-containing domain superfamily	19.6367	13.6333	12.5133	17.52	14.04	16.67	28.2	12	15.64	13.26	9.02	14.32	14.2	14.85	17.99	19.72
Am_HQ_133	6410	XP_004512797.1_TMV resistance protein N [Cicer arietinum]	AT5G36930.3_Disease resistance protein (TIR-NBS-LRR class) family	IPR035897_Toll/interleukin-1 receptor homology (TIR) domain superfamily; IPR027417_P-loop containing nucleoside triphosphate hydrolase; IPR002182_NB-ARC; IPR036390_Winged helix DNA-binding domain superfamily; IPR000157_Toll/interleukin-1 receptor homology (TIR) domain	34.8167	32.32	6.15333	42.26	13.19	56.59	34.67	45.63	23.36	27.97	4.34	6.58	7.54	58.38	27.6	40.8
Am_HQ_134	6431	PNY07524.1_ubiquitin-activating enzyme E1 1-like protein [Trifolium pratense]	AT2G30110.1_ubiquitin-activating enzyme 1, GeneName=UBA1	IPR032420_Ubiquitin-activating enzyme E1, four-helix bundle; IPR000594_THIF-type NAD/FAD binding fold; IPR035985_Ubiquitin-activating enzyme; IPR019572_Ubiquitin-activating enzyme, SCCH domain; IPR000011_Ubiquitin/SUMO-activating enzyme E1; IPR018075_Ubiquitin-activating enzyme E1; IPR032418_Ubiquitin-activating enzyme E1, FCCH domain	21.67	19.6333	12.3633	18.16	41.06	15.38	8.57	25.61	19.44	13.85	4.8	17.53	14.76	18.34	18.47	17.67
Am_HQ_136	6377	XP_012568040.1_nuclear pore complex protein GP210 isoform X2 [Cicer arietinum]	AT5G40480.1_embryo defective 3012, GeneName=EMB3012	IPR008964_Invasin/intimin cell-adhesion fragments; IPR003343_Bacterial Ig-like, group 2	2.69333	6.98	7.66667	10.5067	2.18	4.45	1.45	6.15	8.9	5.89	5.8	8.32	8.88	7.62	9.73	14.17
Am_HQ_138	6395	XP_004514152.1_rRNA biogenesis protein RRP5 [Cicer arietinum]	AT3G11964.2_RIBOSOMAL RNA PROCESSING 5	IPR012340_Nucleic acid-binding, OB-fold; IPR003029_S1 domain; IPR011990_Tetratricopeptide-like helical domain superfamily; IPR008847_Suppressor of forked; IPR003107_HAT (Half-A-TPR) repeat; IPR022967_RNA-binding domain, S1	15.8567	17.5767	13.8267	23.5933	22.68	17.99	6.9	14.94	21.34	16.45	10.46	15.17	15.85	17.55	21.46	31.77
Am_HQ_141	6303	XP_004491686.1_callose synthase 3-like [Cicer arietinum]	AT5G13000.1_glucan synthase-like 12, GeneName=GSL12	IPR026899_1,3-beta-glucan synthase subunit FKS1-like, domain-1; IPR039431_Vta1/callose synthase, N-terminal; IPR003440_Glycosyl transferase, family 48	14.9367	9.83667	20.6567	29.4533	17.97	20.39	6.45	6.88	15.48	7.15	15.56	24.91	21.5	21.84	25.22	41.3
Am_HQ_142	6390	YP_009242008.1_NADH dehydrogenase subunit 4 [Oryza minuta] AMQ23370.1 NADH dehydrogenase subunit 4 [Oryza minuta]	ATMG00580.1_NADH dehydrogenase subunit 4, GeneName=NAD4	IPR001750_NADH:quinone oxidoreductase/Mrp antiporter, membrane subunit	10.6533	2.74333	5.29	6.49333	5.44	13.23	13.29	2.27	2.42	3.54	11.61	2.33	1.93	4.2	6.28	9
Am_HQ_146	6309	XP_020237991.1_E3 ubiquitin-protein ligase UPL3 [Cajanus cajan]	AT4G38600.1_HECT ubiquitin protein ligase family protein KAK, GeneName=KAK	IPR000569_HECT domain; IPR016024_Armadillo-type fold; IPR035983_HECT, E3 ligase catalytic domain	39.9233	41.2933	36.74	41.8667	26.12	50.46	43.19	38.57	45.86	39.45	23.65	45.62	40.95	34.47	42.52	48.61
Am_HQ_151	6321	XP_012574138.1_protein TSS isoform X1 [Cicer arietinum] XP_012574139.1 protein TSS isoform X2 [Cicer arietinum] XP_012574140.1 protein TSS isoform X1 [Cicer arietinum]	AT1G01320.2_Tetratricopeptide repeat (TPR)-like superfamily protein	IPR023231_GSKIP domain superfamily; IPR011990_Tetratricopeptide-like helical domain superfamily; IPR019734_Tetratricopeptide repeat; IPR028275_Clustered mitochondria protein, N-terminal; IPR033646_CLU central domain	14.1567	89.7233	22.7533	14.4967	17.28	10.25	14.94	103.71	75.44	90.02	14.02	23.24	31	17.51	10.71	15.27
Am_HQ_152	6367	XP_027334365.1_GRIP and coiled-coil domain-containing protein 2 isoform X1 [Abrus precatorius] XP_027334375.1 GRIP and coiled-coil domain-containing protein 2 isoform X1 [Abrus precatorius]	AT1G22060.1_sporulation-specific protein	IPR019448_NT-type C2 domain	7.25	10.9867	14.13	18.1	8.08	9.01	4.66	8.7	13.32	10.94	10.98	15.29	16.12	14.76	18.27	21.27
Am_HQ_153	6339	GAU22753.1_hypothetical protein TSUD_129650 [Trifolium subterraneum]	AT5G56930.1_CCCH-type zinc finger family protein, GeneName=EMB1789	IPR000571_Zinc finger, CCCH-type; IPR036855_Zinc finger, CCCH-type superfamily	1.78667	5.02667	5.08333	4.84	2.57	2.35	0.44	6.57	3.85	4.66	2.06	7.95	5.24	5.62	3.91	4.99
Am_HQ_154	6346	XP_014522581.1_protein BUD31 homolog 2-like [Vigna radiata var. radiata]	AT4G21110.1_G10 family protein	IPR002885_Pentatricopeptide repeat	6.32333	5.24	5.13333	5.59667	13.24	3.25	2.48	6.82	5.58	3.32	5.62	5.24	4.54	6.69	6.18	3.92
Am_HQ_155	6300	XP_045793287.1_ABC transporter A family member 1 isoform X2 [Trifolium pratense]	AT2G41700.1_ATP-binding cassette A1, GeneName=ABCA1	IPR003439_ABC transporter-like, ATP-binding domain; IPR027417_P-loop containing nucleoside triphosphate hydrolase; IPR003593_AAA+ ATPase domain	37.6267	15.9433	20.8833	16.1967	45.17	39.3	28.41	18.68	17.73	11.42	16.38	26.94	19.33	16.89	15.3	16.4
Am_HQ_160	6277	XP_004505697.1_uncharacterized protein LOC101494201 [Cicer arietinum]	AT4G38760.1_nucleoporin (DUF3414)	.	22.1767	6.28667	6.76333	13.2767	44.7	13.05	8.78	5.5	8.42	4.94	5.69	7.24	7.36	8.51	13.5	17.82
Am_HQ_163	6325	XP_027349364.1_mediator of RNA polymerase II transcription subunit 14 isoform X1 [Abrus precatorius] XP_027349365.1 mediator of RNA polymerase II transcription subunit 14 isoform X1 [Abrus precatorius]	AT3G04740.1_RNA polymerase II transcription mediator, GeneName=SWP	IPR013947_Mediator complex, subunit Med14	9.57667	16.4433	10.4933	14.3633	11.23	7.31	10.19	13.63	18.28	17.42	7.13	11.9	12.45	10.76	14.9	17.43
Am_HQ_165	6313	XP_004505260.1_putative 1-phosphatidylinositol-3-phosphate 5-kinase FAB1C isoform X3 [Cicer arietinum] XP_012572566.1 putative 1-phosphatidylinositol-3-phosphate 5-kinase FAB1C isoform X1 [Cicer arietinum] XP_027191573.1 putative 1-phosphatidylinositol-3-phosphate 5-kinase FAB1C isoform X2 [Cicer arietinum]	AT1G71010.1_FORMS APLOID AND BINUCLEATE CELLS 1C, GeneName=FAB1C	IPR027409_GroEL-like apical domain superfamily; IPR002423_Chaperonin Cpn60/GroEL/TCP-1 family	57.7567	22.1933	46.1233	60.1133	64.13	57.39	51.75	16.28	26.42	23.88	39.24	49.16	49.97	48.9	83.2	48.24
Am_HQ_168	6300	XP_045826463.1_uncharacterized protein LOC123918448 isoform X1 [Trifolium pratense] XP_045826464.1 uncharacterized protein LOC123918448 isoform X2 [Trifolium pratense]	AT4G27190.1_NB-ARC domain-containing disease resistance protein	IPR027417_P-loop containing nucleoside triphosphate hydrolase; IPR002182_NB-ARC	0.593333	0.483333	0.986667	1.50333	0.15	1.18	0.45	0.43	0.79	0.23	0.12	1.49	1.35	0.85	1.64	2.02
Am_HQ_172	6284	XP_014634181.1_THO complex subunit 2 isoform X1 [Glycine max] XP_028242884.1 THO complex subunit 2-like isoform X1 [Glycine soja] KAG4999305.1 hypothetical protein JHK87_020377 [Glycine soja] KAG5135750.1 hypothetical protein JHK82_020481 [Glycine max] KRH41750.1 hypothetical protein GLYMA_08G048400v4 [Glycine max] RZB95317.1 THO complex subunit 2 isoform A [Glycine soja]	AT1G24706.7_THO2, GeneName=THO2	IPR021418_THO complex, subunitTHOC2, C-terminal; IPR021726_THO complex, subunitTHOC2, N-terminal; IPR032302_THO complex subunit 2, N-terminal domain	27.72	27.2967	23.3567	28.8267	30.75	27.77	24.64	27.84	28.97	25.08	18.02	26.69	25.36	25.77	30.01	30.7
Am_HQ_180	6226	XP_020217565.1_DNA-directed RNA polymerase II subunit 1 isoform X1 [Cajanus cajan] XP_020217566.1 DNA-directed RNA polymerase II subunit 1 isoform X1 [Cajanus cajan]	AT4G35800.1_RNA polymerase II large subunit, GeneName=NRPB1	IPR000684_RNA polymerase II, heptapeptide repeat, eukaryotic	0.183333	0.11	0.0366667	0.09	0.28	0.03	0.24	0.15	0.14	0.04	0.06	0	0.05	0.19	0	0.08
Am_HQ_188	6225	XP_004501831.1_callose synthase 10 [Cicer arietinum]	AT2G36850.1_glucan synthase-like 8, GeneName=GSL8	IPR003440_Glycosyl transferase, family 48; IPR026899_1,3-beta-glucan synthase subunit FKS1-like, domain-1	28.1767	14.97	15.21	17.6967	31.84	23.57	29.12	14.09	16.25	14.57	4.75	21.55	19.33	10.42	18.87	23.8
Am_HQ_190	6157	XP_045829233.1_disease resistance protein RPS4B-like [Trifolium pratense]	AT1G27180.1_disease resistance protein (TIR-NBS-LRR class)	IPR035897_Toll/interleukin-1 receptor homology (TIR) domain superfamily; IPR027417_P-loop containing nucleoside triphosphate hydrolase; IPR002182_NB-ARC; IPR000157_Toll/interleukin-1 receptor homology (TIR) domain; IPR036390_Winged helix DNA-binding domain superfamily; IPR003593_AAA+ ATPase domain	2.41	4.51	4.21667	7.22	1.22	5.14	0.87	2.7	7.45	3.38	3.74	4.24	4.67	6.64	8.31	6.71
Am_HQ_195	6193	XP_026277835.1_RNA-binding protein fusilli isoform X1 [Frankliniella occidentalis]	AT3G20890.1_RNA-binding (RRM/RBD/RNP motifs) family protein	IPR000504_RNA recognition motif domain; IPR035979_RNA-binding domain superfamily	0	0.0333333	0.733333	0	0	0	0	0	0.02	0.08	1.64	0.27	0.29	0	0	0
Am_HQ_196	6201	XP_004494504.1_pentatricopeptide repeat-containing protein At3g49170, chloroplastic-like [Cicer arietinum]	AT3G49170.1_Tetratricopeptide repeat (TPR)-like superfamily protein, GeneName=EMB2261	IPR011990_Tetratricopeptide-like helical domain superfamily; IPR032867_DYW domain; IPR002885_Pentatricopeptide repeat	8.88667	10.0833	6.39667	8.58667	14.46	7.05	5.15	9.46	10.72	10.07	7.11	6.42	5.66	8.51	9.86	7.39
Am_HQ_197	6170	XP_004497386.1_callose synthase 9 isoform X1 [Cicer arietinum]	AT3G07160.2_glucan synthase-like 10, GeneName=GSL10	IPR026899_1,3-beta-glucan synthase subunit FKS1-like, domain-1; IPR003440_Glycosyl transferase, family 48	45.7133	33.75	28.55	42.1667	48.23	45.39	43.52	29.26	39.61	32.38	19.2	33.53	32.92	32.26	40.93	53.31
Am_HQ_198	6192	XP_004508791.1_uncharacterized protein LOC101496590 isoform X1 [Cicer arietinum]	AT3G47910.2_Ubiquitin carboxyl-terminal hydrolase-related protein	IPR038765_Papain-like cysteine peptidase superfamily; IPR006866_Domain of unknown function DUF627, N-terminal; IPR006865_Domain of unknown function DUF629; IPR001394_Peptidase C19, ubiquitin carboxyl-terminal hydrolase	31.2067	25.1167	18.1967	28.3267	38.57	27.7	27.35	24.74	28.49	22.12	6.68	23.67	24.24	21.58	30.22	33.18
Am_HQ_199	6179	TKY55065.1_Formin protein 20 [Spatholobus suberectus]	AT5G07740.3_actin binding protein	.	13.22	6.4	7.58	10.2967	15.42	11.67	12.57	5.89	7.13	6.18	5.25	8.65	8.84	9.78	10.82	10.29
Am_HQ_200	6134	XP_004495177.1_protein NETWORKED 1D [Cicer arietinum]	AT1G03080.2_kinase interacting (KIP1-like) family protein, GeneName=NET1D	IPR011684_Protein Networked (NET), actin-binding (NAB) domain	35.18	28.85	41.9933	51.3367	29.79	34.69	41.06	26.77	34.28	25.5	30.8	50.74	44.44	41.54	67.02	45.45
Am_HQ_203	6104	TKY62423.1_NETWORKED 1D [Spatholobus suberectus]	AT1G03080.2_kinase interacting (KIP1-like) family protein, GeneName=NET1D	IPR011684_Protein Networked (NET), actin-binding (NAB) domain	11.8633	2.30667	8.06667	8.94333	9.33	8.52	17.74	1.56	3.79	1.57	8.35	8.4	7.45	6.7	9.71	10.42
Am_HQ_204	6156	TKY70289.1_DNA-directed RNA polymerase II subunit 1 [Spatholobus suberectus]	AT4G35800.1_RNA polymerase II large subunit, GeneName=NRPB1	IPR007080_RNA polymerase Rpb1, domain 1; IPR007066_RNA polymerase Rpb1, domain 3; IPR006592_RNA polymerase, N-terminal; IPR007075_RNA polymerase Rpb1, domain 6; IPR007073_RNA polymerase Rpb1, domain 7; IPR000684_RNA polymerase II, heptapeptide repeat, eukaryotic; IPR007081_RNA polymerase Rpb1, domain 5; IPR000722_RNA polymerase, alpha subunit; IPR007083_RNA polymerase Rpb1, domain 4	69.6867	52.6267	32.0267	39.7	91.97	44.78	72.31	50.78	61.6	45.5	21.41	38.11	36.56	33.92	39.54	45.64
Am_HQ_205	6160	XP_003628402.3_guanine nucleotide exchange factor SPIKE 1 [Medicago truncatula] RHN40666.1 putative dedicator of cytokinesis, DHR-1 domain, DHR-2 domain-containing protein [Medicago truncatula]	AT4G16340.2_guanyl-nucleotide exchange factors;GTPase binding;GTP binding protein, GeneName=SPK1	IPR027007_C2 DOCK-type domain; IPR016024_Armadillo-type fold; IPR027357_DOCKER domain	12.34	15.0467	14.2667	19.5667	15.09	13.33	8.6	10.49	20.91	13.74	10.72	18.09	13.99	16.24	18.71	23.75
Am_HQ_206	6175	KEH30989.1_homeobox domain protein [Medicago truncatula]	AT1G28420.1_homeobox-1, GeneName=HB-1	IPR028941_WHIM2 domain; IPR018501_DDT domain; IPR028942_WHIM1 domain; IPR007759_ASXL, HARE-HTH domain	22.8833	21.65	20.57	27.8733	13.75	30.93	23.97	22.47	21.76	20.72	17.98	21.13	22.6	29.79	25.16	28.67
Am_HQ_209	6104	XP_012572567.1_LOW QUALITY PROTEIN: homeobox-DDT domain protein RLT1-like [Cicer arietinum]	AT1G28420.1_homeobox-1, GeneName=HB-1	IPR018501_DDT domain; IPR028942_WHIM1 domain; IPR007759_ASXL, HARE-HTH domain; IPR028941_WHIM2 domain; IPR009057_Homeobox-like domain superfamily; IPR001356_Homeobox domain	22.55	19.34	12.6033	25.3067	17.58	29.57	20.5	19.79	19.6	18.63	7.22	15.99	14.6	28.51	22.75	24.66
Am_HQ_212	6142	XP_012571322.1_probable serine/threonine-protein kinase WNK4 [Cicer arietinum]	AT3G51630.2_with no lysine (K) kinase 5, GeneName=WNK5	IPR002885_Pentatricopeptide repeat	0.566667	5.47	4.15333	3.55667	0.52	0.93	0.25	5.83	5.89	4.69	2.22	5.53	4.71	3.64	3.79	3.24
Am_HQ_213	6061	XP_004508046.1_1-phosphatidylinositol-3-phosphate 5-kinase FAB1A isoform X2 [Cicer arietinum]	AT3G14270.2_phosphatidylinositol-4-phosphate 5-kinase family protein, GeneName=FAB1B	IPR027409_GroEL-like apical domain superfamily; IPR000306_FYVE zinc finger; IPR002498_Phosphatidylinositol-4-phosphate 5-kinase, core; IPR002423_Chaperonin Cpn60/GroEL/TCP-1 family; IPR011011_Zinc finger, FYVE/PHD-type	9.79	21.1233	16.3067	20.59	9.69	9.72	9.96	23.34	18.93	21.1	10.34	18.41	20.17	20.09	19.84	21.84
Am_HQ_215	6087	XP_045807706.1_protein NETWORKED 1A [Trifolium pratense] XP_045807709.1 protein NETWORKED 1A [Trifolium pratense]	AT4G14760.2_kinase interacting (KIP1-like) family protein, GeneName=NET1B	.	0.02	1.39	5.35	1.80333	0	0.05	0.01	0.31	2.97	0.89	3.56	7.3	5.19	1.59	1.16	2.66
Am_HQ_216	6115	KYP65229.1_Retrovirus-related Pol polyprotein from transposon TNT 1-94 [Cajanus cajan]	AT5G09620.2_Octicosapeptide/Phox/Bem1p family protein	.	3.98	3.22	3.34333	3.34667	9.05	1.11	1.78	3.34	1.95	4.37	2.38	3.29	4.36	3.2	2.31	4.53
Am_HQ_219	6123	XP_012568544.1_anaphase-promoting complex subunit 1 [Cicer arietinum]	AT5G05560.2_E3 ubiquitin ligase, GeneName=EMB2771	IPR041221_Anaphase-promoting complex subunit 1, C-terminal; IPR024990_Anaphase-promoting complex subunit 1	13.4133	13.85	13.9433	17.9267	16.52	13.71	10.01	12.43	15.17	13.95	13.45	13.94	14.44	15.78	16.29	21.71
Am_HQ_224	6088	XP_027353057.1_endoribonuclease Dicer homolog 1 [Abrus precatorius]	AT1G01040.1_dicer-like 1, GeneName=DCL1	IPR027417_P-loop containing nucleoside triphosphate hydrolase; IPR001650_Helicase, C-terminal; IPR014001_Helicase superfamily 1/2, ATP-binding domain; IPR006935_Helicase/UvrB, N-terminal	10.0433	16.8267	11.3033	13.38	7.6	14.04	8.49	15.5	17.24	17.74	9.05	12.27	12.59	12.13	11.65	16.36
Am_HQ_225	6082	XP_042434769.1_uncharacterized protein LOC122020806 [Zingiber officinale]	AT3G02300.1_Regulator of chromosome condensation (RCC1) family protein	IPR012337_Ribonuclease H-like superfamily; IPR007021_Domain of unknown function DUF659	5.98333	11.8633	9.20333	10.84	5.36	6.63	5.96	11.85	13.35	10.39	9.11	10.12	8.38	10.33	12.12	10.07
Am_HQ_230	6074	XP_027367091.1_protein TIME FOR COFFEE isoform X1 [Abrus precatorius]	AT3G22380.1_time for coffee, GeneName=TIC	.	38.91	32.8633	26.79	30.7233	35.23	28.88	52.62	31.56	34.89	32.14	20.66	32.02	27.69	35.32	27.76	29.09
Am_HQ_231	6070	GAU35153.1_hypothetical protein TSUD_217860 [Trifolium subterraneum]	AT4G23160.3_cysteine-rich RECEPTOR-like kinase, GeneName=CRK8	IPR036875_Zinc finger, CCHC-type superfamily; IPR001584_Integrase, catalytic core; IPR012337_Ribonuclease H-like superfamily; IPR025724_GAG-pre-integrase domain	2.70333	0.876667	0.353333	0.59	1.09	0.93	6.09	0.78	1.04	0.81	0.18	0.42	0.46	0.28	0.87	0.62
Am_HQ_232	6048	XP_004496497.1_ABC transporter C family member 10-like [Cicer arietinum] XP_012570146.1 ABC transporter C family member 10-like [Cicer arietinum] XP_027189341.1 ABC transporter C family member 10-like [Cicer arietinum] XP_027189342.1 ABC transporter C family member 10-like [Cicer arietinum]	AT3G59140.1_multidrug resistance-associated protein 14, GeneName=ABCC10	IPR003593_AAA+ ATPase domain; IPR003439_ABC transporter-like, ATP-binding domain; IPR027417_P-loop containing nucleoside triphosphate hydrolase; IPR036640_ABC transporter type 1, transmembrane domain superfamily; IPR011527_ABC transporter type 1, transmembrane domain	42.0933	45.4333	25.93	24.3233	26.07	66.03	34.18	43.33	38.96	54.01	12.88	31.61	33.3	30.45	19.2	23.32
Am_HQ_238	6026	GAU37771.1_hypothetical protein TSUD_102880 [Trifolium subterraneum]	AT5G03220.1_Mediator complex, subunit Med7	IPR026960_Reverse transcriptase zinc-binding domain	5.75	14.5633	9.86667	7.66333	4.23	7.72	5.3	11.14	15.76	16.79	3.82	12.88	12.9	5.09	7.52	10.38
Am_HQ_240	6050	XP_004489220.1_protein RST1 isoform X1 [Cicer arietinum]	AT3G27670.1_ARM repeat superfamily protein, GeneName=RST1	IPR022542_Focadhesin/RST, DUF3730; IPR016024_Armadillo-type fold	5.2	10.9433	9.18333	10.78	4.39	8.24	2.97	9.62	12.62	10.59	8.19	8.84	10.52	10.16	9.2	12.98
Am_HQ_241	6038	XP_004514922.1_vacuolar protein sorting-associated protein 8 homolog [Cicer arietinum]	AT4G00800.1_transducin family protein / WD-40 repeat family protein, GeneName=SETH5	IPR000547_Clathrin, heavy chain/VPS, 7-fold repeat; IPR036322_WD40-repeat-containing domain superfamily; IPR025941_Vacuolar protein sorting-associated protein 8, central domain; IPR001841_Zinc finger, RING-type	7.28333	14.9733	9.18	10.71	8.66	7.9	5.29	16.14	15.43	13.35	8.2	9.72	9.62	10.37	9.37	12.39
Am_HQ_242	6047	XP_004492642.1_brefeldin A-inhibited guanine nucleotide-exchange protein 2 [Cicer arietinum]	AT1G01960.1_SEC7-like guanine nucleotide exchange family protein, GeneName=EDA10	IPR032629_Mon2, dimerisation and cyclophilin-binding domain; IPR035999_Sec7 domain superfamily; IPR000904_Sec7 domain; IPR016024_Armadillo-type fold; IPR015403_Sec7, C-terminal; IPR032691_Guanine nucleotide exchange factor, N-terminal	39.0633	25.1533	26.2533	36.6567	38.09	43.98	35.12	18.1	27.48	29.88	15.2	32.42	31.14	28.1	36.35	45.52
Am_HQ_243	6010	XP_045801298.1_uncharacterized protein LOC123895126 [Trifolium pratense]	AT3G15120.2_P-loop containing nucleoside triphosphate hydrolases superfamily protein	IPR041569_AAA ATPase, AAA+ lid domain; IPR027417_P-loop containing nucleoside triphosphate hydrolase; IPR003593_AAA+ ATPase domain; IPR003959_ATPase, AAA-type, core	5.84667	9.68	3.07333	9.27	9.85	4.96	2.73	10.84	11.02	7.18	2.73	3.14	3.35	9.3	9.66	8.85
Am_HQ_244	6054	XP_021803099.1_SUMO-conjugating enzyme SCE1-like isoform X1 [Prunus avium] XP_021803582.1 SUMO-conjugating enzyme SCE1-like isoform X1 [Prunus avium]	AT3G57870.1_sumo conjugation enzyme 1, GeneName=SCE1	IPR000608_Ubiquitin-conjugating enzyme E2; IPR016135_Ubiquitin-conjugating enzyme/RWD-like	11.8	2.09333	1.08333	4.41333	5.21	20.05	10.14	3.58	1.45	1.25	0.82	1.04	1.39	10.02	1.41	1.81
Am_HQ_246	6024	XP_045813274.1_brefeldin A-inhibited guanine nucleotide-exchange protein 5 isoform X3 [Trifolium pratense]	AT3G43300.3_HOPM interactor 7, GeneName=ATMIN7	IPR016024_Armadillo-type fold; IPR000904_Sec7 domain; IPR015403_Sec7, C-terminal; IPR032691_Guanine nucleotide exchange factor, N-terminal; IPR035999_Sec7 domain superfamily; IPR032629_Mon2, dimerisation and cyclophilin-binding domain; IPR032817_Mon2, C-terminal	13.0867	20.7767	25.31	28.1233	8.19	21.12	9.95	17.37	24.12	20.84	20.34	27.54	28.05	22.13	26.93	35.31
Am_HQ_247	6034	AFK44590.1_unknown [Lotus japonicus]	AT5G24670.1_Cytidine/deoxycytidylate deaminase family protein, GeneName=EMB2820	IPR016193_Cytidine deaminase-like	0	3.82	1.09667	4.29	0	0	0	1.02	10.44	0	0	1.59	1.7	0.9	11.62	0.35
Am_HQ_248	6008	PNY06537.1_ribonuclease H, partial [Trifolium pratense]	AT2G01050.1_zinc ion binding / nucleic acid binding protein	IPR002156_Ribonuclease H domain; IPR026960_Reverse transcriptase zinc-binding domain; IPR012337_Ribonuclease H-like superfamily	4.26667	3.18667	3.95667	3.58333	6.17	3.93	2.7	2.95	3.81	2.8	2.71	4.71	4.45	2.99	3.46	4.3
Am_HQ_251	6015	XP_004499983.1_callose synthase 7 [Cicer arietinum]	AT1G06490.1_glucan synthase-like 7, GeneName=CalS7	IPR026899_1,3-beta-glucan synthase subunit FKS1-like, domain-1; IPR003440_Glycosyl transferase, family 48	11.2733	6.43667	17.6567	14.9633	13.15	14.28	6.39	6.98	7.45	4.88	15.1	20.94	16.93	16.32	14.03	14.54
Am_HQ_252	5954	XP_027365915.1_ABC transporter C family member 5-like isoform X1 [Abrus precatorius]	AT1G04120.1_multidrug resistance-associated protein 5, GeneName=ABCC5	IPR036640_ABC transporter type 1, transmembrane domain superfamily; IPR003593_AAA+ ATPase domain; IPR003439_ABC transporter-like, ATP-binding domain; IPR011527_ABC transporter type 1, transmembrane domain; IPR027417_P-loop containing nucleoside triphosphate hydrolase	142.617	30.1367	58.9667	29.3967	139.68	156.04	132.13	28.54	32.56	29.31	43.34	73.28	60.28	18.61	35.68	33.9
Am_HQ_254	6007	RZB83739.1_tRNA-specific adenosine deaminase TAD3 isoform G [Glycine soja] RZB83740.1 tRNA-specific adenosine deaminase TAD3 isoform H [Glycine soja]	AT5G24670.1_Cytidine/deoxycytidylate deaminase family protein, GeneName=EMB2820	.	0.396667	0	0	0.213333	1.16	0.03	0	0	0	0	0	0	0	0	0.48	0.16
Am_HQ_256	5957	XP_027355052.1_E3 ubiquitin-protein ligase RNF4-like [Abrus precatorius] XP_027355053.1 E3 ubiquitin-protein ligase RNF4-like [Abrus precatorius] XP_027355054.1 E3 ubiquitin-protein ligase RNF4-like [Abrus precatorius]	AT5G48655.3_RING/U-box superfamily protein	IPR001841_Zinc finger, RING-type	1.53333	2	1.53	1.52333	0.88	1.48	2.24	2.36	1.84	1.8	0.81	1.72	2.06	1.32	1.55	1.7
Am_HQ_257	6138	XP_027360332.1_DDT domain-containing protein PTM isoform X2 [Abrus precatorius]	AT5G12400.1_PHD-finger and DNA binding domain-containing protein	IPR011011_Zinc finger, FYVE/PHD-type; IPR019787_Zinc finger, PHD-finger; IPR018501_DDT domain; IPR001965_Zinc finger, PHD-type	11.7	7.19333	5.92667	7.94	9.77	12.24	13.09	7.28	7.1	7.2	3.84	6.86	7.08	7.5	7.66	8.66
Am_HQ_258	5967	XP_004485779.1_callose synthase 11-like [Cicer arietinum]	AT4G04970.1_glucan synthase-like 1, GeneName=GSL1	IPR026899_1,3-beta-glucan synthase subunit FKS1-like, domain-1; IPR003440_Glycosyl transferase, family 48	7.07	6.25333	4.2	7.69333	5.57	6.29	9.35	7.59	6.21	4.96	3.52	4.87	4.21	7.45	7.52	8.11
Am_HQ_259	6010	XP_027347910.1_DDT domain-containing protein PTM-like [Abrus precatorius]	AT5G22760.1_PHD finger family protein	IPR001965_Zinc finger, PHD-type; IPR028942_WHIM1 domain; IPR011011_Zinc finger, FYVE/PHD-type; IPR018501_DDT domain; IPR019787_Zinc finger, PHD-finger	7.28667	11.6833	8.90333	11.5833	3.26	8.94	9.66	11.67	12.89	10.49	5.81	10.15	10.75	11.7	11	12.05
Am_HQ_262	6017	XP_045813221.1_uncharacterized protein LOC123907154 isoform X2 [Trifolium pratense]	AT2G03140.6_alpha/beta-Hydrolases superfamily protein	.	6.1	11.41	8.94	7.78667	6.64	5.67	5.99	15.84	7.98	10.41	5.95	9.32	11.55	7.28	6.86	9.22
Am_HQ_264	5985	XP_004498624.1_uncharacterized protein LOC101499788 isoform X1 [Cicer arietinum]	AT4G32620.1_Enhancer of polycomb-like transcription factor protein	.	8.11	10.81	9.12333	13.3333	8.52	8.91	6.9	10.14	12.06	10.23	6.5	10.13	10.74	10.11	14.32	15.57
Am_HQ_268	5930	TKY56385.1_E3 ubiquitin-protein ligase SHPRH [Spatholobus suberectus]	AT2G40770.1_RING-finger, DEAD-like helicase, PHD and SNF2 domain-containing protein	IPR027417_P-loop containing nucleoside triphosphate hydrolase; IPR001965_Zinc finger, PHD-type; IPR000330_SNF2, N-terminal; IPR011011_Zinc finger, FYVE/PHD-type; IPR001650_Helicase, C-terminal; IPR001841_Zinc finger, RING-type; IPR014001_Helicase superfamily 1/2, ATP-binding domain	0.573333	7.32	4.23667	3.82667	0.46	0.65	0.61	7.75	7.35	6.86	3.49	4.43	4.79	4.08	3.71	3.69
Am_HQ_275	5957	AGO58930.1_polyprotein [Broad bean wilt virus 2]	.	IPR001205_RNA-directed RNA polymerase, C-terminal domain; IPR000199_Peptidase C3A/C3B, picornaviral; IPR000605_Helicase, superfamily 3, single-stranded DNA/RNA virus; IPR027417_P-loop containing nucleoside triphosphate hydrolase; IPR043502_DNA/RNA polymerase superfamily; IPR009003_Peptidase S1, PA clan; IPR004004_Helicase/polymerase/peptidase polyprotein, Calicivirus-type	0.16	0	0.0466667	0.34	0.26	0.22	0	0	0	0	0.1	0.04	0	0.35	0.52	0.15
Am_HQ_276	5954	KAG8365713.1_hypothetical protein BUALT_Bualt17G0000500 [Buddleja alternifolia]	.	.	210.857	98.4467	60.45	87.3567	407.54	98.96	126.07	227.62	32.43	35.29	84.83	48.95	47.57	86.24	92.78	83.05
Am_HQ_277	5923	XP_045788058.1_eukaryotic translation initiation factor 4G-like isoform X1 [Trifolium pratense]	AT3G60240.4_eukaryotic translation initiation factor 4G, GeneName=EIF4G	IPR016024_Armadillo-type fold; IPR003890_MIF4G-like, type 3; IPR003891_Initiation factor eIF-4 gamma, MA3	69.2233	50.0467	48.0967	64.0533	70.12	67.88	69.67	45.46	52	52.68	27.3	56.87	60.12	48.87	63.09	80.2
Am_HQ_281	5945	XP_004508686.1_uncharacterized protein LOC101489994 isoform X2 [Cicer arietinum]	AT5G07940.1_dentin sialophosphoprotein-like protein	.	9.6	7.89333	6.40333	9.88	12.02	8.23	8.55	7.24	7.81	8.63	3.58	7.34	8.29	6.75	10.12	12.77
Am_HQ_282	5905	XP_004512797.1_TMV resistance protein N [Cicer arietinum]	AT5G36930.3_Disease resistance protein (TIR-NBS-LRR class) family	IPR036390_Winged helix DNA-binding domain superfamily; IPR027417_P-loop containing nucleoside triphosphate hydrolase; IPR000157_Toll/interleukin-1 receptor homology (TIR) domain; IPR035897_Toll/interleukin-1 receptor homology (TIR) domain superfamily	49.9067	51.64	7.86667	62.2167	20	81.42	48.3	66.56	41.44	46.92	4.65	8.77	10.18	85.31	43.96	57.38
Am_HQ_283	5945	PWA34830.1_RNA-directed DNA polymerase, eukaryota, Reverse transcriptase zinc-binding domain protein [Artemisia annua]	.	.	8.2	9.16	1.76333	10.11	9.42	4.51	10.67	8.89	13.41	5.18	0.64	2.94	1.71	5.8	20.74	3.79
Am_HQ_284	5960	XP_004496318.1_uncharacterized protein LOC101504689 isoform X1 [Cicer arietinum]	AT3G52250.1_Duplicated homeodomain-like superfamily protein	IPR017930_Myb domain; IPR009057_Homeobox-like domain superfamily; IPR001005_SANT/Myb domain	45.16	30.3	21.3133	24.3433	53.47	24.86	57.15	29.55	32.94	28.41	14.04	26.36	23.54	17.96	29.06	26.01
Am_HQ_291	5749	XP_020228989.1_clathrin heavy chain 1 isoform X1 [Cajanus cajan] KYP56502.1 Clathrin heavy chain 1 [Cajanus cajan]	AT3G11130.1_Clathrin, heavy chain	IPR016024_Armadillo-type fold; IPR015348_Clathrin, heavy chain, linker, core motif; IPR016025_Clathrin heavy chain, N-terminal; IPR016341_Clathrin, heavy chain; IPR000547_Clathrin, heavy chain/VPS, 7-fold repeat; IPR022365_Clathrin, heavy chain, propeller repeat	61.2133	45.89	50.0233	69.2633	61.06	71.64	50.94	41.88	53.36	42.43	30.86	60.64	58.57	55.22	66.03	86.54
Am_HQ_294	5872	AES89655.1_callose synthase-like protein [Medicago truncatula]	AT4G03550.1_glucan synthase-like 5, GeneName=GSL05	IPR026899_1,3-beta-glucan synthase subunit FKS1-like, domain-1; IPR003440_Glycosyl transferase, family 48	23.4233	9.76	11.7367	15.4933	12.43	35.36	22.48	8.95	10.2	10.13	8.77	12.62	13.82	17.9	10.92	17.66
Am_HQ_295	5925	XP_027333446.1_1-phosphatidylinositol-3-phosphate 5-kinase FAB1A isoform X1 [Abrus precatorius] XP_027333447.1 1-phosphatidylinositol-3-phosphate 5-kinase FAB1A isoform X1 [Abrus precatorius]	AT4G33240.5_1-phosphatidylinositol-3-phosphate 5-kinase FAB1A, GeneName=FAB1A	IPR027409_GroEL-like apical domain superfamily; IPR002423_Chaperonin Cpn60/GroEL/TCP-1 family	0.143333	0.343333	0.16	0.446667	0	0.3	0.13	0.39	0.2	0.44	0	0.25	0.23	0.38	0.38	0.58
Am_HQ_297	5878	XP_004501831.1_callose synthase 10 [Cicer arietinum]	AT2G36850.1_glucan synthase-like 8, GeneName=GSL8	IPR026899_1,3-beta-glucan synthase subunit FKS1-like, domain-1; IPR003440_Glycosyl transferase, family 48	43.0367	23.4233	25.31	27.5833	47.23	34.71	47.17	18.6	28.21	23.46	22.58	24.91	28.44	24.84	24.67	33.24
Am_HQ_298	5872	KAH1156922.1_hypothetical protein GYH30_029636 [Glycine max] KAH1223147.1 Protein NETWORKED 1A [Glycine max]	AT3G22790.1_Kinase interacting (KIP1-like) family protein, GeneName=NET1A	IPR011684_Protein Networked (NET), actin-binding (NAB) domain	2.66333	5.95333	11.6933	19.9233	0.67	5.73	1.59	5.17	7.18	5.51	9.74	12.64	12.7	16.88	15.7	27.19
Am_HQ_299	5885	PNY14551.1_resistance protein, partial [Trifolium pratense]	AT5G17680.1_disease resistance protein (TIR-NBS-LRR class)	IPR036390_Winged helix DNA-binding domain superfamily; IPR027417_P-loop containing nucleoside triphosphate hydrolase	27.9467	37.1467	8.01667	49.2633	19.96	39.27	24.61	45.26	33.42	32.76	5.86	8.64	9.55	63.32	43.57	40.9
Am_HQ_302	5751	XP_027332156.1_brefeldin A-inhibited guanine nucleotide-exchange protein 1-like isoform X1 [Abrus precatorius]	AT4G38200.1_SEC7-like guanine nucleotide exchange family protein	IPR000904_Sec7 domain; IPR015403_Sec7, C-terminal; IPR035999_Sec7 domain superfamily; IPR032817_Mon2, C-terminal; IPR032629_Mon2, dimerisation and cyclophilin-binding domain; IPR016024_Armadillo-type fold; IPR032691_Guanine nucleotide exchange factor, N-terminal	7.59	10.39	10.44	14.5	6.37	11.38	5.02	7.61	12.9	10.66	6.48	12.7	12.14	10.24	14.55	18.71
Am_HQ_304	5889	XP_012568614.1_proteasome adapter and scaffold protein ECM29 [Cicer arietinum]	AT2G26780.2_ARM repeat superfamily protein	IPR016024_Armadillo-type fold; IPR024372_Proteasome component Ecm29	14.0333	20.6867	15.04	20.9467	9.65	20.64	11.81	18.29	23.58	20.19	9.79	18.43	16.9	16.72	20.09	26.03
Am_HQ_306	5899	XP_027332090.1_structural maintenance of chromosomes flexible hinge domain-containing protein GMI1 [Abrus precatorius]	AT5G24280.2_gamma-irradiation and mitomycin c induced 1, GeneName=GMI1	IPR036890_Histidine kinase/HSP90-like ATPase superfamily	37.19	29.5567	23.9867	33.4633	50.7	29.78	31.09	27.61	31.53	29.53	16.25	27.99	27.72	34.79	31.25	34.35
Am_HQ_307	5882	XP_004489457.1_sister chromatid cohesion protein SCC2 isoform X1 [Cicer arietinum]	AT5G15540.1_PHD finger family protein, GeneName=EMB2773	IPR016024_Armadillo-type fold; IPR001965_Zinc finger, PHD-type; IPR026003_HEAT repeat associated with sister chromatid cohesion protein; IPR024986_Sister chromatid cohesion C-terminal domain; IPR011011_Zinc finger, FYVE/PHD-type	16.88	17.39	12.6733	15.1333	20.73	13.14	16.77	17.21	18.56	16.4	10.69	13.41	13.92	14.19	15.79	15.42
Am_HQ_310	5902	TKY73324.1_hypothetical protein E2542_SST02076 [Spatholobus suberectus]	AT5G07980.1_dentin sialophosphoprotein-like protein	.	22.8667	15.2333	13.76	20.6167	15.24	31.06	22.3	14.83	16.62	14.25	10.39	15.48	15.41	18.22	19.67	23.96
Am_HQ_313	5804	XP_012567955.1_histone acetyltransferase HAC1-like [Cicer arietinum]	AT1G79000.1_histone acetyltransferase of the CBP family 1, GeneName=HAC1	IPR013178_Histone acetyltransferase Rtt109/CBP; IPR011011_Zinc finger, FYVE/PHD-type; IPR000433_Zinc finger, ZZ-type; IPR019787_Zinc finger, PHD-finger; IPR035898_TAZ domain superfamily; IPR000197_Zinc finger, TAZ-type	16.7967	19.8833	14.9933	16.33	20.67	16.39	13.33	18.77	21.96	18.92	10.88	17	17.1	14.23	17.62	17.14
Am_HQ_314	5892	XP_028207311.1_pentatricopeptide repeat-containing protein At1g62670, mitochondrial-like isoform X2 [Glycine soja]	.	IPR002885_Pentatricopeptide repeat	0.896667	2.45667	2.80333	2.98	0.56	1.63	0.5	2.54	2.47	2.36	1.73	3.42	3.26	2.54	3	3.4
Am_HQ_315	5857	XP_045826840.1_E3 ubiquitin-protein ligase UPL1-like isoform X2 [Trifolium pratense]	AT1G55860.1_LOW protein: E3 ubiquitin ligase-like protein, GeneName=UPL1	IPR035983_HECT, E3 ligase catalytic domain; IPR000569_HECT domain; IPR025527_HUWE1/Rev1, ubiquitin binding region	55.3233	61.7067	65.06	68.1667	55.39	54.91	55.67	56.01	65.3	63.81	47.88	77.76	69.54	65.91	67.05	71.54
Am_HQ_318	5868	XP_012569928.1_protein MON2 homolog isoform X3 [Cicer arietinum]	AT5G27970.5_ARM repeat superfamily protein	IPR032817_Mon2, C-terminal	8.21667	5.40333	5.09	8.19333	11.78	9	3.87	4.95	5.78	5.48	4.16	5.31	5.8	7.09	7.86	9.63
Am_HQ_319	5766	TKY52460.1_Bromodomain and WD repeat-containing protein 1 [Spatholobus suberectus]	AT2G47410.5_WD40 domain-containing protein	IPR036427_Bromodomain-like superfamily; IPR001680_WD40 repeat; IPR036322_WD40-repeat-containing domain superfamily	21.6467	18.9333	13.2767	17.0333	31.38	16.9	16.66	17.42	20.66	18.72	10.05	14.95	14.83	14.27	18.1	18.73
Am_HQ_321	5857	TKY75146.1_PERQ amino acid-rich with GYF domain-containing protein 2 [Spatholobus suberectus]	AT5G42950.1_GYF domain-containing protein	IPR035445_GYF-like domain superfamily; IPR003169_GYF domain	3.04667	1.79333	0.92	1.31333	5.4	1.67	2.07	1.67	2.69	1.02	1.03	0.75	0.98	1.05	1.92	0.97
Am_HQ_322	5850	XP_027333425.1_LOW QUALITY PROTEIN: formin-like protein 18 [Abrus precatorius]	AT2G25050.1_actin-binding FH2 (formin 2) family protein	IPR015425_Formin, FH2 domain	1.10333	2.24333	3.48	3.21667	1.34	1.23	0.74	1.88	2.93	1.92	2.4	3.83	4.21	2.69	2.87	4.09
Am_HQ_327	5834	XP_045826463.1_uncharacterized protein LOC123918448 isoform X1 [Trifolium pratense] XP_045826464.1 uncharacterized protein LOC123918448 isoform X2 [Trifolium pratense]	AT1G61190.4_LRR and NB-ARC domains-containing disease resistance protein	IPR002182_NB-ARC; IPR027417_P-loop containing nucleoside triphosphate hydrolase	2.58	8.75	8.34667	11.1233	2.45	3.47	1.82	6.8	14.41	5.04	6.74	11.72	6.58	8.15	18.25	6.97
Am_HQ_328	5835	TKY56776.1_ARF guanine-nucleotide exchange factor GNOM [Spatholobus suberectus]	AT1G13980.2_sec7 domain-containing protein, GeneName=GN	IPR032691_Guanine nucleotide exchange factor, N-terminal; IPR035999_Sec7 domain superfamily; IPR016024_Armadillo-type fold; IPR000904_Sec7 domain	1.57333	2.45667	2.47	2.27	1.54	2.01	1.17	2.23	2.59	2.55	3.01	3.07	1.33	1.45	2.54	2.82
Am_HQ_329	5837	XP_012570682.1_GRIP and coiled-coil domain-containing protein 2 [Cicer arietinum]	AT4G31570.6_nucleoporin	.	38.0533	14.1367	15.7067	19.5633	43.45	34.26	36.45	13.81	13.26	15.34	12.12	18.29	16.71	21.98	17.71	19
Am_HQ_330	5715	XP_027193391.1_uncharacterized protein LOC101496163 [Cicer arietinum]	AT1G63490.4_transcription factor jumonji (jmjC) domain-containing protein	IPR004198_Zinc finger, C5HC2-type; IPR001965_Zinc finger, PHD-type; IPR019787_Zinc finger, PHD-finger; IPR011011_Zinc finger, FYVE/PHD-type; IPR003347_JmjC domain; IPR001606_ARID DNA-binding domain; IPR036431_ARID DNA-binding domain superfamily; IPR003349_JmjN domain; IPR013637_Lysine-specific demethylase-like domain	22.0167	16.46	10.3	16.18	25	15.34	25.71	17.6	15.48	16.3	8.99	9.36	12.55	15.88	17.41	15.25
Am_HQ_333	5713	XP_027330849.1_clathrin heavy chain 2 [Abrus precatorius]	AT3G11130.1_Clathrin, heavy chain	IPR000547_Clathrin, heavy chain/VPS, 7-fold repeat; IPR016024_Armadillo-type fold; IPR015348_Clathrin, heavy chain, linker, core motif; IPR016025_Clathrin heavy chain, N-terminal; IPR016341_Clathrin, heavy chain; IPR022365_Clathrin, heavy chain, propeller repeat	172.503	118.637	93.45	115.373	202.82	155.25	159.44	101.61	132.35	121.95	51.36	115.39	113.6	88.27	116.7	141.15
Am_HQ_336	5823	TKY56776.1_ARF guanine-nucleotide exchange factor GNOM [Spatholobus suberectus]	AT1G13980.2_sec7 domain-containing protein, GeneName=GN	IPR035999_Sec7 domain superfamily; IPR032691_Guanine nucleotide exchange factor, N-terminal; IPR000904_Sec7 domain; IPR016024_Armadillo-type fold	2.05	6.18333	6.88667	5.28333	1.74	2.68	1.73	4.27	7.31	6.97	4.2	6.67	9.79	5.4	4.85	5.6
Am_HQ_337	5815	XP_027337613.1_eukaryotic translation initiation factor 4G-like isoform X1 [Abrus precatorius]	AT3G60240.4_eukaryotic translation initiation factor 4G, GeneName=EIF4G	IPR016024_Armadillo-type fold; IPR003891_Initiation factor eIF-4 gamma, MA3; IPR003890_MIF4G-like, type 3	36.88	39.56	42.0167	52.4567	28.03	43.59	39.02	35.91	42.96	39.81	32.62	46.16	47.27	42.93	50.62	63.82
Am_HQ_338	5821	XP_004510941.1_brefeldin A-inhibited guanine nucleotide-exchange protein 2 [Cicer arietinum]	AT3G60860.1_SEC7-like guanine nucleotide exchange family protein	IPR032817_Mon2, C-terminal; IPR015403_Sec7, C-terminal; IPR016024_Armadillo-type fold	3.8	6.93667	8.97333	10.3333	2.79	5.41	3.2	5.82	8.11	6.88	6.5	10.51	9.91	7.96	8.8	14.24
Am_HQ_340	5812	XP_012573317.1_PH-interacting protein isoform X1 [Cicer arietinum] XP_012573318.1 PH-interacting protein isoform X2 [Cicer arietinum] XP_012573320.1 PH-interacting protein isoform X1 [Cicer arietinum] XP_027187962.1 PH-interacting protein isoform X2 [Cicer arietinum]	AT5G49430.1_WD40/YVTN repeat and Bromo-WDR9-I-like domain-containing protein	IPR001680_WD40 repeat; IPR001487_Bromodomain; IPR036322_WD40-repeat-containing domain superfamily; IPR036427_Bromodomain-like superfamily	3.15	10.5133	6.82333	8.73	2.55	4.1	2.8	11.63	10.9	9.01	5.74	7.32	7.41	8.41	8.7	9.08
Am_HQ_345	5791	XP_045799293.1_protein ESSENTIAL FOR POTEXVIRUS ACCUMULATION 1-like [Trifolium pratense]	AT5G42950.1_GYF domain-containing protein	IPR003169_GYF domain; IPR035445_GYF-like domain superfamily	27.8433	22.6633	19.81	21.4433	36.94	22.94	23.65	23.75	22.11	22.13	18.89	21.56	18.98	18.31	22.82	23.2
Am_HQ_347	5798	XP_004502344.1_major antigen isoform X2 [Cicer arietinum]	AT1G24460.1_TGN-related, localized SYP41 interacting protein, GeneName=TNO1	.	4.04	15.3267	12.0033	11.5833	3.43	5.34	3.35	13.81	17.67	14.5	8.03	14.47	13.51	10.8	11.78	12.17
Am_HQ_352	5749	XP_027359320.1_uncharacterized protein LOC113867987 isoform X1 [Abrus precatorius] XP_027359321.1 uncharacterized protein LOC113867987 isoform X1 [Abrus precatorius] XP_027359322.1 uncharacterized protein LOC113867987 isoform X1 [Abrus precatorius] XP_027359323.1 uncharacterized protein LOC113867987 isoform X1 [Abrus precatorius]	AT3G48050.2_protein SUO, GeneName=SUO	IPR035441_TFIIS/LEDGF domain superfamily; IPR001025_Bromo adjacent homology (BAH) domain; IPR017923_Transcription factor IIS, N-terminal; IPR003617_Transcription elongation factor, TFIIS/CRSP70, N-terminal, sub-type	70.8833	60.1267	58.7933	62.46	56.73	73.49	82.43	54.79	63.25	62.34	43.11	67.51	65.76	54.48	68.56	64.34
Am_HQ_354	5767	.	AT4G16380.3_Heavy metal transport/detoxification superfamily protein	.	1.07333	3.09	2.04333	2.80333	1.21	1.64	0.37	2.98	3.62	2.67	1.12	2.71	2.3	3.11	2.95	2.35
Am_HQ_355	5765	RDX82474.1_Zinc finger CCCH domain-containing protein 55, partial [Mucuna pruriens]	AT3G26850.2_histone-lysine N-methyltransferase	IPR000061_SWAP/Surp; IPR035967_SWAP/Surp superfamily	4.62333	7.78333	7.91667	9.98	5.51	4.9	3.46	7.7	8.88	6.77	6.76	8.42	8.57	7.54	10.61	11.79
Am_HQ_357	5759	XP_012571271.1_LOW QUALITY PROTEIN: proteasome activator subunit 4-like [Cicer arietinum]	AT3G13330.1_proteasome activating protein 200, GeneName=PA200	IPR021843_Proteasome activator complex subunit 4 C-terminal domain; IPR032430_Proteasome activator Blm10, mid region; IPR016024_Armadillo-type fold	41.9933	33.6467	31.0633	21.75	24.18	67.48	34.32	28.25	41.53	31.16	23.64	33.87	35.68	20.34	20.02	24.89
Am_HQ_358	5682	BAG72151.1_hypothetical protein [Lotus japonicus]	ATMG00860.1_DNA/RNA polymerases superfamily protein, GeneName=ORF158	IPR041588_Integrase zinc-binding domain; IPR041373_Reverse transcriptase, RNase H-like domain; IPR043502_DNA/RNA polymerase superfamily; IPR012337_Ribonuclease H-like superfamily	4.29	7.86	3.72	6.00667	4.56	4.67	3.64	4.83	11.21	7.54	2.16	4.66	4.34	4.43	8.63	4.96
Am_HQ_359	5762	XP_004488239.1_uncharacterized protein LOC101491171 [Cicer arietinum]	AT3G62900.2_CW-type Zinc Finger	IPR011124_Zinc finger, CW-type	9.65333	6.32333	7.27333	9.64	12.03	9.36	7.57	6.29	7.21	5.47	4.56	8.72	8.54	8.08	10.35	10.49
Am_HQ_361	5743	XP_027330987.1_pentatricopeptide repeat-containing protein At1g71210, mitochondrial [Abrus precatorius]	AT1G71210.1_Pentatricopeptide repeat (PPR) superfamily protein	IPR002885_Pentatricopeptide repeat	4.50333	3.76333	2.56333	3.44667	3.52	5.07	4.92	3.35	4.38	3.56	1.39	3.13	3.17	2.82	3.43	4.09
Am_HQ_362	5758	XP_027344388.1_histone acetyltransferase HAC1-like isoform X8 [Abrus precatorius]	AT1G79000.1_histone acetyltransferase of the CBP family 1, GeneName=HAC1	IPR000433_Zinc finger, ZZ-type; IPR011011_Zinc finger, FYVE/PHD-type; IPR000197_Zinc finger, TAZ-type; IPR035898_TAZ domain superfamily; IPR013178_Histone acetyltransferase Rtt109/CBP; IPR019787_Zinc finger, PHD-finger	20.79	23.5467	20.0467	23.2033	21.4	23.74	17.23	20.15	28.15	22.34	12.51	25.34	22.29	18.67	24.26	26.68
Am_HQ_363	5695	AES76423.2_disease resistance protein (TIR-NBS-LRR class) [Medicago truncatula]	AT5G36930.3_Disease resistance protein (TIR-NBS-LRR class) family	IPR000157_Toll/interleukin-1 receptor homology (TIR) domain; IPR035897_Toll/interleukin-1 receptor homology (TIR) domain superfamily; IPR002182_NB-ARC; IPR027417_P-loop containing nucleoside triphosphate hydrolase; IPR036390_Winged helix DNA-binding domain superfamily	23.1133	21.26	4.91	45.01	5.09	35.1	29.15	33.63	15.3	14.85	4.81	4.2	5.72	87.98	18.32	28.73
Am_HQ_373	5743	XP_045788058.1_eukaryotic translation initiation factor 4G-like isoform X1 [Trifolium pratense]	AT3G60240.4_eukaryotic translation initiation factor 4G, GeneName=EIF4G	IPR003890_MIF4G-like, type 3; IPR016024_Armadillo-type fold	5.18	4.69	4.19333	5.27333	2.01	12.51	1.02	1.59	10.01	2.47	1.45	8.16	2.97	2.37	9.6	3.85
Am_HQ_375	5735	GAU34086.1_hypothetical protein TSUD_255820 [Trifolium subterraneum]	ATMG01250.1_RNA-directed DNA polymerase (reverse transcriptase), GeneName=ORF102	IPR036691_Endonuclease/exonuclease/phosphatase superfamily	0.193333	0.39	0.19	0.193333	0.3	0.04	0.24	0.45	0.37	0.35	0.17	0.18	0.22	0.22	0.18	0.18
Am_HQ_382	5730	XP_004508688.1_uncharacterized protein LOC101489994 isoform X4 [Cicer arietinum]	AT5G07940.1_dentin sialophosphoprotein-like protein	.	2.85	3.43333	2.73333	3.81	4.79	3.54	0.22	3.51	5.34	1.45	3.06	3.16	1.98	4.52	4.1	2.81
Am_HQ_383	5680	XP_045819942.1_E3 ubiquitin-protein ligase KEG isoform X2 [Trifolium pratense]	AT5G13530.1_protein kinases;ubiquitin-protein ligase, GeneName=KEG	IPR002110_Ankyrin repeat; IPR040847_Mind bomb, SH3 repeat domain; IPR001841_Zinc finger, RING-type; IPR011009_Protein kinase-like domain superfamily; IPR000719_Protein kinase domain; IPR027370_RING-type zinc-finger, LisH dimerisation motif; IPR036770_Ankyrin repeat-containing domain superfamily	32.27	22.71	20.2533	26.4567	25.02	31.5	40.29	20.83	23.65	23.65	14.99	23.06	22.71	25.55	25.07	28.75
Am_HQ_386	5722	XP_027190602.1_probable disease resistance protein At1g61180 [Cicer arietinum]	AT1G61190.4_LRR and NB-ARC domains-containing disease resistance protein	IPR027417_P-loop containing nucleoside triphosphate hydrolase; IPR002182_NB-ARC	0.806667	0.636667	1.11	1.75	0.2	1.66	0.56	1.16	0.75	0	0.53	1.95	0.85	1.37	2.56	1.32
Am_HQ_388	5702	PNY14551.1_resistance protein, partial [Trifolium pratense]	AT5G41750.1_Disease resistance protein (TIR-NBS-LRR class) family	.	18.25	19.8933	4.32333	33.8867	13.07	23.51	18.17	24.5	17.69	17.49	3.12	4.59	5.26	43.22	29.82	28.62
Am_HQ_389	5685	XP_004502920.1_zinc finger CCCH domain-containing protein 38-like [Cicer arietinum] XP_012571935.1 zinc finger CCCH domain-containing protein 38-like [Cicer arietinum] XP_012571936.1 zinc finger CCCH domain-containing protein 38-like [Cicer arietinum] XP_027190231.1 zinc finger CCCH domain-containing protein 38-like [Cicer arietinum]	AT3G18640.1_Zinc finger C-x8-C-x5-C-x3-H type family protein	IPR000571_Zinc finger, CCCH-type; IPR036855_Zinc finger, CCCH-type superfamily	2.70333	13.8	6.47	10.2467	1.48	5.09	1.54	12.3	16.1	13	1.98	7.21	10.22	9.25	11.12	10.37
Am_HQ_390	5705	MCH92400.1_prohibitin-1 mitochondrial-like [Trifolium medium]	AT1G03860.2_prohibitin 2, GeneName=PHB2	.	7.78667	3.84	3	8.78667	2.88	13.44	7.04	3.65	3.96	3.91	1.96	3.17	3.87	15.65	5.03	5.68
Am_HQ_392	5704	KYP54148.1_ABC transporter G family member 36 [Cajanus cajan]	AT1G59870.1_ABC-2 and Plant PDR ABC-type transporter family protein, GeneName=PEN3	.	0	0	0	0	0	0	0	0	0	0	0	0	0	0	0	0
Am_HQ_393	5674	XP_004494015.1_protein SHOOT GRAVITROPISM 6-like isoform X1 [Cicer arietinum]	AT2G36810.2_ARM repeat superfamily protein	IPR032682_Condensin complex subunit 1, C-terminal; IPR016024_Armadillo-type fold	20.8467	18.47	14.2933	24.3867	25.1	21.2	16.24	16.97	20.84	17.6	10.91	16.91	15.06	19.28	24.82	29.06
Am_HQ_396	5595	XP_004493271.2_uncharacterized protein LOC101513134 [Cicer arietinum]	AT5G17910.1_cardiomyopathy-associated protein	.	7.08667	6.26	9.77333	11.8367	4.82	6.96	9.48	4.66	6.39	7.73	5.95	9.86	13.51	7.83	11.48	16.2
Am_HQ_397	5592	XP_004486353.1_sister chromatid cohesion protein PDS5 homolog B-A [Cicer arietinum]	AT5G47690.1_binding protein	IPR016024_Armadillo-type fold	40.84	30.6567	29.2367	26.3233	45.23	38.96	38.33	29.99	31.92	30.06	24.55	31.92	31.24	24.08	26.31	28.58
Am_HQ_398	5639	RDX86281.1_S phase cyclin A-associated protein in the endoplasmic reticulum, partial [Mucuna pruriens]	.	IPR032446_S phase cyclin A-associated protein in the endoplasmic reticulum, N-terminal	10.23	9.8	9.82333	12.2167	8.31	11.16	11.22	8.14	11.34	9.92	7.78	11.08	10.61	10.06	12.06	14.53
Am_HQ_403	5671	TKY70948.1_Lysine-specific demethylase 5B [Spatholobus suberectus]	AT1G63490.2_transcription factor jumonji (jmjC) domain-containing protein	IPR004198_Zinc finger, C5HC2-type; IPR003347_JmjC domain; IPR001606_ARID DNA-binding domain; IPR036431_ARID DNA-binding domain superfamily; IPR003349_JmjN domain; IPR013637_Lysine-specific demethylase-like domain; IPR019787_Zinc finger, PHD-finger; IPR011011_Zinc finger, FYVE/PHD-type; IPR001965_Zinc finger, PHD-type	3.90333	8.11	6.93667	3.71667	5.59	5.22	0.9	8.53	10.19	5.61	4.24	9.23	7.34	3.5	1.39	6.26
Am_HQ_404	5661	XP_027334438.1_clathrin heavy chain 2-like [Abrus precatorius]	AT3G11130.1_Clathrin, heavy chain	IPR016341_Clathrin, heavy chain; IPR015348_Clathrin, heavy chain, linker, core motif; IPR016024_Armadillo-type fold; IPR000547_Clathrin, heavy chain/VPS, 7-fold repeat; IPR016025_Clathrin heavy chain, N-terminal; IPR022365_Clathrin, heavy chain, propeller repeat	1.95667	8.97333	16.8233	16.5933	1.02	3.82	1.03	5.88	12.93	8.11	16.32	17.93	16.22	12.39	13.74	23.65
Am_HQ_412	5646	PNX71648.1_TIR-NBS resistance protein [Trifolium pratense]	AT1G72900.1_Toll-Interleukin-Resistance (TIR) domain-containing protein	IPR000157_Toll/interleukin-1 receptor homology (TIR) domain; IPR035897_Toll/interleukin-1 receptor homology (TIR) domain superfamily	2.84333	5.91	1.42667	11.95	2.19	5.96	0.38	12.61	4.9	0.22	1.19	2.91	0.18	29.23	6.36	0.26
Am_HQ_415	5653	XP_004493271.2_uncharacterized protein LOC101513134 [Cicer arietinum]	AT5G17910.1_cardiomyopathy-associated protein	.	1.37333	1.69667	2.42333	2.37	1.87	2.25	0	2.13	2.96	0	2.85	4.34	0.08	3.14	3.97	0
Am_HQ_416	5655	XP_027354015.1_uncharacterized protein LOC113864470 [Abrus precatorius]	AT2G25320.3_TRAF-like family protein	IPR002083_MATH/TRAF domain	17.12	12.1467	11.0833	15.5233	13.48	21.92	15.96	11.87	12.22	12.35	8.95	12.82	11.48	16	14.1	16.47
Am_HQ_419	5422	XP_020206099.1_structural maintenance of chromosomes flexible hinge domain-containing protein GMI1 isoform X2 [Cajanus cajan]	AT5G24280.2_gamma-irradiation and mitomycin c induced 1, GeneName=GMI1	IPR036890_Histidine kinase/HSP90-like ATPase superfamily	1.26	0.626667	0.653333	0.57	1.05	1.06	1.67	0.51	0.88	0.49	0	0.82	1.14	0.6	0.63	0.48
Am_HQ_421	5609	RDY01222.1_putative E3 ubiquitin-protein ligase RZFP34, partial [Mucuna pruriens]	AT5G25560.4_CHY-type/CTCHY-type/RING-type Zinc finger protein	IPR037274_Zinc finger, CHY-type superfamily; IPR008913_Zinc finger, CHY-type	9.32667	3.30333	3.18333	9.23333	0.81	11.45	15.72	1.22	6.61	2.08	0.73	4.16	4.66	11.76	11.99	3.95
Am_HQ_422	5632	MCI03151.1_MORN repeat-containing protein [Trifolium medium]	AT5G22640.3_MORN (Membrane Occupation and Recognition Nexus) repeat-containing protein, GeneName=emb1211	.	0.316667	0.59	0.293333	0.31	0.56	0.25	0.14	0.63	0.77	0.37	0.09	0.46	0.33	0.2	0.41	0.32
Am_HQ_423	5609	GAU46782.1_hypothetical protein TSUD_351810 [Trifolium subterraneum]	AT4G23160.3_cysteine-rich RECEPTOR-like kinase, GeneName=CRK8	IPR012337_Ribonuclease H-like superfamily; IPR043502_DNA/RNA polymerase superfamily; IPR013103_Reverse transcriptase, RNA-dependent DNA polymerase; IPR025724_GAG-pre-integrase domain; IPR001584_Integrase, catalytic core	4.48	2.01333	1.32667	1.27	5.51	2.6	5.33	1.09	2.53	2.42	0.44	1.97	1.57	1.06	1.36	1.39
Am_HQ_425	5629	XP_004507589.1_sister chromatid cohesion protein PDS5 homolog A-B-like [Cicer arietinum]	AT5G47690.3_binding protein	IPR016024_Armadillo-type fold	18.47	17.98	11.5433	13.51	22.03	15.09	18.29	18.81	17.39	17.74	9.6	12.54	12.49	12.75	12.49	15.29
Am_HQ_427	5624	XP_045826969.1_uncharacterized protein LOC123918852 isoform X2 [Trifolium pratense]	AT5G56930.1_CCCH-type zinc finger family protein, GeneName=EMB1789	IPR036855_Zinc finger, CCCH-type superfamily; IPR000571_Zinc finger, CCCH-type	8.6	14.8133	18.4167	16.3633	10.14	13.78	1.88	14.72	16.44	13.28	14.07	22.95	18.23	16.16	18.04	14.89
Am_HQ_428	5608	AES76423.2_disease resistance protein (TIR-NBS-LRR class) [Medicago truncatula]	AT5G36930.3_Disease resistance protein (TIR-NBS-LRR class) family	IPR036390_Winged helix DNA-binding domain superfamily; IPR027417_P-loop containing nucleoside triphosphate hydrolase	9.4	5.50333	1.89	12.8033	2.28	13.75	12.17	7.11	5	4.4	1.81	2.56	1.3	23.9	7.34	7.17
Am_HQ_430	5306	KAH1128822.1_hypothetical protein J1N35_000200 [Gossypium stocksii]	.	.	888.127	120.463	197.243	299.217	1721.33	403.77	539.28	221.06	70.28	70.05	352.86	126.4	112.47	329.04	345.54	223.07
Am_HQ_432	5573	XP_027344761.1_protein TSS isoform X1 [Abrus precatorius]	AT1G15290.1_Tetratricopeptide repeat (TPR)-like superfamily protein	IPR011990_Tetratricopeptide-like helical domain superfamily; IPR033646_CLU central domain; IPR019734_Tetratricopeptide repeat; IPR028275_Clustered mitochondria protein, N-terminal	2.65667	115.96	62.6667	83.4833	0.52	7.09	0.36	124.33	113.72	109.83	42.02	75.62	70.36	83.54	66.5	100.41
Am_HQ_433	5537	XP_004506831.1_protein SCAR2 isoform X2 [Cicer arietinum]	AT2G38440.1_SCAR homolog 2, GeneName=SCAR2	.	14.93	12.4967	7.58667	11.0333	15.72	16.02	13.05	12.67	13.66	11.16	6	9.07	7.69	11.23	10.87	11
Am_HQ_435	5572	XP_027190700.1_endoribonuclease Dicer homolog 3a isoform X2 [Cicer arietinum]	AT3G43920.2_dicer-like 3, GeneName=DCL3	IPR036389_Ribonuclease III, endonuclease domain superfamily; IPR001650_Helicase, C-terminal; IPR000999_Ribonuclease III domain; IPR027417_P-loop containing nucleoside triphosphate hydrolase; IPR036085_PAZ domain superfamily; IPR003100_PAZ domain	4.21667	9.85667	9.21	23.7667	1.39	10.21	1.05	8.86	12.41	8.3	7.87	9.81	9.95	24.74	22.64	23.92
Am_HQ_436	5601	KYP58728.1_Retrovirus-related Pol polyprotein from transposon TNT 1-94 [Cajanus cajan]	AT4G23160.3_cysteine-rich RECEPTOR-like kinase, GeneName=CRK8	IPR043502_DNA/RNA polymerase superfamily; IPR025724_GAG-pre-integrase domain; IPR001584_Integrase, catalytic core; IPR012337_Ribonuclease H-like superfamily; IPR013103_Reverse transcriptase, RNA-dependent DNA polymerase	9.73333	16.25	10.8933	12.7167	10.81	10.46	7.93	18.84	17.03	12.88	5.14	15.26	12.28	10.72	14.07	13.36
Am_HQ_439	5585	XP_004492099.1_uncharacterized protein LOC101514217 isoform X1 [Cicer arietinum]	AT2G39580.2_zinc finger C3H1 domain protein	IPR019607_Putative zinc-finger domain; IPR011990_Tetratricopeptide-like helical domain superfamily	30.8767	21.36	15.0633	18.9	39.39	26.68	26.56	20.65	23.95	19.48	12.32	17.98	14.89	17	21.96	17.74
Am_HQ_440	5595	XP_027192483.1_dicer-like protein 4 isoform X4 [Cicer arietinum]	AT5G20320.1_dicer-like 4, GeneName=DCL4	IPR001650_Helicase, C-terminal; IPR003100_PAZ domain; IPR027417_P-loop containing nucleoside triphosphate hydrolase	11.4133	4.41	5.26333	8.04667	2.27	25.12	6.85	1.45	6.57	5.21	6.44	4.3	5.05	7.31	10.84	5.99
Am_HQ_443	5586	XP_012569078.1_LOW QUALITY PROTEIN: protein SCAR3-like [Cicer arietinum]	AT2G38440.1_SCAR homolog 2, GeneName=SCAR2	.	2.08	3.08	5.47333	3.13667	1.41	1.69	3.14	2.32	3.71	3.21	5.68	5.08	5.66	3.82	2.58	3.01
Am_HQ_446	5573	XP_004498103.1_RNA helicase aquarius [Cicer arietinum]	AT2G38770.1_P-loop containing nucleoside triphosphate hydrolases superfamily protein, GeneName=EMB2765	IPR032174_Intron-binding protein aquarius, N-terminal; IPR041677_DNA2/NAM7 helicase, helicase domain; IPR026300_CWF11 family; IPR041679_DNA2/NAM7 helicase-like, C-terminal; IPR027417_P-loop containing nucleoside triphosphate hydrolase	17.99	15.0633	11.66	16.9133	22.59	18.4	12.98	12.59	17.15	15.45	7.65	14.43	12.9	13.25	15.97	21.52
Am_HQ_447	5574	GAU51717.1_hypothetical protein TSUD_415230, partial [Trifolium subterraneum]	AT5G52090.1_P-loop containing nucleoside triphosphate hydrolases superfamily protein	IPR045529_Domain of unknown function DUF6469; IPR041677_DNA2/NAM7 helicase, helicase domain; IPR027417_P-loop containing nucleoside triphosphate hydrolase	7.44	3.96667	3.07	5.20667	11.7	4.48	6.14	4.04	4.26	3.6	1.97	4.03	3.21	3.78	5.78	6.06
Am_HQ_450	5543	XP_004499141.1_uncharacterized protein LOC101507508 [Cicer arietinum]	AT5G42950.1_GYF domain-containing protein	IPR003169_GYF domain; IPR035445_GYF-like domain superfamily	65.4233	24.0067	16.15	30.8433	40.9	71.91	83.46	27.04	23.94	21.04	12.81	18.21	17.43	37.35	20.66	34.52
Am_HQ_451	5570	GAU35451.1_hypothetical protein TSUD_364070 [Trifolium subterraneum]	AT1G79350.1_RING/FYVE/PHD zinc finger superfamily protein, GeneName=EMB1135	IPR039187_Strawberry notch, AAA domain; IPR011011_Zinc finger, FYVE/PHD-type; IPR001965_Zinc finger, PHD-type; IPR026937_Strawberry notch, helicase C domain; IPR019787_Zinc finger, PHD-finger; IPR027417_P-loop containing nucleoside triphosphate hydrolase	3.83667	2.91333	1.75333	2.74333	11.2	0.24	0.07	7.22	1.03	0.49	4.27	0.48	0.51	6.75	0.67	0.81
Am_HQ_452	5537	PNX98577.1_hypothetical protein L195_g021827 [Trifolium pratense]	.	IPR005162_Retrotransposon gag domain	2.13	13.8733	2.25	2.27333	3.93	1.35	1.11	15.47	16.76	9.39	0.39	3.58	2.78	1.27	2.83	2.72
Am_HQ_453	5536	GAU10492.1_hypothetical protein TSUD_419360, partial [Trifolium subterraneum]	.	.	0.113333	0.106667	0.0966667	0.0666667	0.06	0.18	0.1	0.12	0.11	0.09	0.09	0.2	0	0.03	0.08	0.09
Am_HQ_455	5554	PNX77125.1_retrovirus-related Pol polyprotein from transposon TNT 1-94 [Trifolium pratense]	AT4G23160.3_cysteine-rich RECEPTOR-like kinase, GeneName=CRK8	IPR036390_Winged helix DNA-binding domain superfamily; IPR000157_Toll/interleukin-1 receptor homology (TIR) domain; IPR035897_Toll/interleukin-1 receptor homology (TIR) domain superfamily; IPR027417_P-loop containing nucleoside triphosphate hydrolase; IPR002182_NB-ARC	15.2633	21.6033	13.79	17.1833	19.1	16.18	10.51	24.31	22.63	17.87	6.95	18.07	16.35	15.63	17.25	18.67
Am_HQ_456	5507	XP_004509158.1_uncharacterized protein LOC101508500 isoform X1 [Cicer arietinum]	AT3G50590.2_Transducin/WD40 repeat-like superfamily protein	IPR001680_WD40 repeat; IPR036322_WD40-repeat-containing domain superfamily	24.11	20.2533	25.4867	26.94	23.9	29.54	18.89	15.08	25.04	20.64	17.66	29.72	29.08	21.28	25.9	33.64
Am_HQ_458	5539	XP_045806409.1_exportin-7-B isoform X2 [Trifolium pratense]	AT5G06120.8_ARM repeat superfamily protein	IPR025724_GAG-pre-integrase domain	0.12	0.806667	0.813333	0.75	0.05	0.25	0.06	0.41	0.97	1.04	0.65	0.9	0.89	0.43	0.79	1.03
Am_HQ_461	5528	XP_004501087.1_uncharacterized protein LOC101498285 [Cicer arietinum]	AT5G11700.2_ephrin type-B receptor	.	28.46	27.4633	24.4167	31.91	22.65	34.21	28.52	22.56	29.93	29.9	18.55	28.19	26.51	30.99	27.69	37.05
Am_HQ_462	5550	XP_028239810.1_VIN3-like protein 1 isoform X1 [Glycine soja] XP_028239811.1 VIN3-like protein 1 isoform X1 [Glycine soja] KAH1241172.1 VIN3-like protein 1 [Glycine max] RZC02088.1 VIN3-like protein 1 isoform D [Glycine soja] RZC02089.1 VIN3-like protein 1 isoform E [Glycine soja] RZC02090.1 VIN3-like protein 1 isoform F [Glycine soja]	AT3G24440.2_Fibronectin type III domain-containing protein, GeneName=VRN5	IPR032881_Oberon, PHD finger domain; IPR036116_Fibronectin type III superfamily	1.83667	4.10333	4.14	3.99	1.18	2.92	1.41	4.15	4.25	3.91	2.03	5.84	4.55	3.85	3.93	4.19
Am_HQ_463	5503	XP_004502400.1_ATP-dependent RNA helicase DEAH11, chloroplastic [Cicer arietinum]	AT4G01020.1_helicase domain-containing protein / IBR domain-containing protein / zinc finger protein-like protein	IPR014001_Helicase superfamily 1/2, ATP-binding domain; IPR007502_Helicase-associated domain; IPR001650_Helicase, C-terminal; IPR002867_IBR domain; IPR011709_Domain of unknown function DUF1605; IPR027417_P-loop containing nucleoside triphosphate hydr	17.92	20.7367	16.1667	27.0567	23.21	18.64	11.91	18.84	24.39	18.98	10.55	21.47	16.48	20.54	32.44	28.19
Am_HQ_464	5260	XP_004502400.1_ATP-dependent RNA helicase DEAH11, chloroplastic [Cicer arietinum]	AT4G01020.1_helicase domain-containing protein / IBR domain-containing protein / zinc finger protein-like protein	IPR027417_P-loop containing nucleoside triphosphate hydrolase; IPR011545_DEAD/DEAH box helicase domain; IPR007502_Helicase-associated domain; IPR011709_Domain of unknown function DUF1605; IPR001650_Helicase, C-terminal; IPR014001_Helicase superfamily 1/2, ATP-binding domain	0.433333	0.663333	0.733333	0.473333	0	0.43	0.87	0.56	0.77	0.66	0.62	0.7	0.88	0.69	0	0.73
Am_HQ_470	5333	XP_004505147.1_probable phosphoinositide phosphatase SAC9 [Cicer arietinum]	AT3G59770.1_sacI homology domain-containing protein / WW domain-containing protein, GeneName=SAC9	IPR002013_SAC domain; IPR036020_WW domain superfamily; IPR001202_WW domain	8.94	20.54	18.9233	18.31	6.28	12.03	8.51	18.19	22.46	20.97	13.93	22.83	20.01	15.52	17.74	21.67
Am_HQ_472	5450	XP_004511407.1_uncharacterized protein LOC101495944 isoform X2 [Cicer arietinum]	AT5G16680.1_RING/FYVE/PHD zinc finger superfamily protein	IPR011011_Zinc finger, FYVE/PHD-type	26.35	14.93	12.2833	16.5667	37.99	21.79	19.27	10.51	20.65	13.63	5.82	16.32	14.71	11.46	15.34	22.9
Am_HQ_476	5509	XP_012573521.1_dicer-like protein 4 isoform X5 [Cicer arietinum]	AT5G20320.1_dicer-like 4, GeneName=DCL4	IPR027417_P-loop containing nucleoside triphosphate hydrolase; IPR003100_PAZ domain; IPR036389_Ribonuclease III, endonuclease domain superfamily; IPR001650_Helicase, C-terminal; IPR014001_Helicase superfamily 1/2, ATP-binding domain; IPR011545_DEAD/D	123.21	54.7933	59.8567	114.5	73.32	227.11	69.2	27.77	78.73	57.88	38.19	75.66	65.72	70.94	151.07	121.49
Am_HQ_481	5500	GAU34331.1_hypothetical protein TSUD_20380 [Trifolium subterraneum]	AT1G35660.1_erythroid differentiation factor-like protein	.	3.90333	4.90333	2.83667	5.6	3.99	5.37	2.35	3.43	7.92	3.36	1.17	4.06	3.28	3.62	8.54	4.64
Am_HQ_482	5502	XP_004505512.1_transcription factor GTE4-like [Cicer arietinum] XP_012572642.1 transcription factor GTE4-like [Cicer arietinum] XP_012572643.1 transcription factor GTE4-like [Cicer arietinum]	AT1G06230.4_global transcription factor group E4, GeneName=GTE4	IPR036427_Bromodomain-like superfamily; IPR027353_NET domain; IPR001487_Bromodomain	1.61	2.83	1.68333	2.32333	1.96	1.62	1.25	2.87	2.78	2.84	1.02	1.99	2.04	1.47	2.58	2.92
Am_HQ_483	5369	XP_004495037.1_myosin-6-like [Cicer arietinum]	AT5G43900.3_myosin 2, GeneName=MYA2	IPR001609_Myosin head, motor domain; IPR027417_P-loop containing nucleoside triphosphate hydrolase; IPR002710_Dilute domain; IPR004009_Myosin, N-terminal, SH3-like; IPR000048_IQ motif, EF-hand binding site	15.4933	15.92	16.2467	19.1	12.11	17.72	16.65	15.04	16.93	15.79	12.05	19.8	16.89	16.97	18.39	21.94
Am_HQ_484	5483	XP_020229879.1_uncharacterized protein LOC109810746 [Cajanus cajan] XP_029129687.1 uncharacterized protein LOC109810746 [Cajanus cajan]	AT3G48050.2_protein SUO, GeneName=SUO	IPR035441_TFIIS/LEDGF domain superfamily; IPR003617_Transcription elongation factor, TFIIS/CRSP70, N-terminal, sub-type; IPR001025_Bromo adjacent homology (BAH) domain; IPR017923_Transcription factor IIS, N-terminal	50.8967	31.2333	24.7933	29.7167	70.33	34.48	47.88	28.38	36.63	28.69	17.98	30.35	26.05	23.88	33.57	31.7
Am_HQ_485	5473	XP_024625380.2_ABC transporter C family member 5-like [Medicago truncatula] XP_039684057.1 ABC transporter C family member 5-like [Medicago truncatula] RHN48289.1 putative xenobiotic-transporting ATPase [Medicago truncatula]	AT1G04120.1_multidrug resistance-associated protein 5, GeneName=ABCC5	IPR003439_ABC transporter-like, ATP-binding domain; IPR003593_AAA+ ATPase domain; IPR036640_ABC transporter type 1, transmembrane domain superfamily; IPR011527_ABC transporter type 1, transmembrane domain; IPR027417_P-loop containing nucleoside triphosphate hydrolase	2.88	14.8733	16.7867	39.2467	1.58	5.15	1.91	12.42	19.06	13.14	16.31	16.6	17.45	34.57	25.81	57.36
Am_HQ_486	5461	XP_004507447.1_transcription termination factor MTERF2, chloroplastic isoform X2 [Cicer arietinum]	AT2G21710.1_Mitochondrial transcription termination factor family protein, GeneName=EMB2219	IPR003690_Transcription termination factor, mitochondrial/chloroplastic	3.91667	11.3967	3.92667	3.69	5.76	1.96	4.03	12	11.62	10.57	1.85	4.89	5.04	3.49	3.39	4.19
Am_HQ_488	5517	XP_004488268.1_187-kDa microtubule-associated protein AIR9 isoform X2 [Cicer arietinum]	AT2G34680.2_Outer arm dynein light chain 1 protein, GeneName=AIR9	IPR025875_Leucine rich repeat 4	3.92333	5.83	10.45	10.8467	2.12	6.22	3.43	7.69	6.38	3.42	11.16	10.66	9.53	9.1	10.06	13.38
Am_HQ_490	5353	XP_012567611.1_uncharacterized protein LOC101496756 [Cicer arietinum]	AT1G24300.1_GYF domain-containing protein	IPR003169_GYF domain; IPR035445_GYF-like domain superfamily	35.06	20.8033	20.9467	25.6833	37.61	25.93	41.64	19.22	23.37	19.82	17.3	22.63	22.91	18.64	27.1	31.31
Am_HQ_491	5414	XP_027352653.1_transcription elongation factor SPT6 homolog isoform X1 [Abrus precatorius]	AT1G65440.1_global transcription factor group B1, GeneName=GTB1	IPR012340_Nucleic acid-binding, OB-fold; IPR017072_Transcription elongation factor Spt6; IPR032706_Transcription elongation factor Spt6, helix-hairpin-helix motif; IPR028231_Transcription elongation factor Spt6, YqgF domain; IPR035420_Spt6, SH2 domain; IPR010994_RuvA domain 2-like; IPR041692_HHH domain 9; IPR028083_Spt6 acidic, N-terminal domain; IPR012337_Ribonuclease H-like superfamily; IPR0368…	57.61	40.12	33.6933	44.5233	68.8	49.17	54.86	37.31	45.57	37.48	22.72	41.36	37	36.6	46.75	50.22
Am_HQ_494	5302	XP_027361258.1_histone-lysine N-methyltransferase SUVR5-like isoform X1 [Abrus precatorius]	AT2G23740.3_histone-lysine N-methyltransferase SUVR5, GeneName=SUVR5	IPR013087_Zinc finger C2H2-type; IPR040689_SUVR5, C2H2-type Zinc finger, 3 repeats; IPR001214_SET domain; IPR007728_Pre-SET domain	8.45	10.29	9.02333	9.65667	8.43	9.16	7.76	9	11.64	10.23	8.29	9.01	9.77	8.05	10.2	10.72
Am_HQ_495	5471	RDX81822.1_Protein MODIFIER OF SNC1 1, partial [Mucuna pruriens]	AT4G24680.3_modifier of snc1, GeneName=MOS1	IPR009738_BAT2, N-terminal	31.0333	26.6633	23.02	29.2067	34.73	27.4	30.97	23.16	32.08	24.75	14.85	27.85	26.36	24.48	30.95	32.19
Am_HQ_496	5468	XP_004495016.1_nuclear pore complex protein NUP214 isoform X1 [Cicer arietinum]	AT1G55540.1_Nuclear pore complex protein, GeneName=LNO1	.	12.6033	11.1733	10.7	13.8167	18.16	12.6	7.05	11.05	11.01	11.46	9.27	11.24	11.59	11.77	12.98	16.7
Am_HQ_497	5426	KAE9553665.1_hypothetical protein FO519_003113 [Halicephalobus sp. NKZ332]	.	IPR015819_Lipid transport protein, beta-sheet shell; IPR001846_von Willebrand factor, type D domain; IPR015255_Vitellinogen, open beta-sheet	0.556667	0	0	0	0.32	1.35	0	0	0	0	0	0	0	0	0	0
Am_HQ_498	5353	XP_004493407.1_ferredoxin-dependent glutamate synthase, chloroplastic [Cicer arietinum]	AT5G04140.1_glutamate synthase 1, GeneName=GLU1	IPR002489_Glutamate synthase, alpha subunit, C-terminal; IPR006982_Glutamate synthase, central-N; IPR029055_Nucleophile aminohydrolases, N-terminal; IPR036485_Glutamate synthase, alpha subunit, C-terminal domain superfamily; IPR017932_Glutamine amido	35.4767	549.017	75.33	73.44	43.36	39.1	23.97	558.97	435.8	652.28	28.26	77.23	120.5	55.13	66.3	98.89
Am_HQ_502	5466	KAG5131862.1_hypothetical protein JHK84_038259 [Glycine max]	AT2G27500.2_Glycosyl hydrolase superfamily protein	IPR005162_Retrotransposon gag domain	10.6267	8.22333	6.89667	6.63667	5.79	17.21	8.88	4.74	15.4	4.53	2.83	11.65	6.21	7.96	6.74	5.21
Am_HQ_503	5472	MCH92400.1_prohibitin-1 mitochondrial-like [Trifolium medium]	AT1G03860.2_prohibitin 2, GeneName=PHB2	.	43.0767	27.77	18.6933	46.9833	17.63	68.4	43.2	26.49	32.56	24.26	4.85	27.56	23.67	68.63	34.04	38.28
Am_HQ_504	5481	XP_027357306.1_pentatricopeptide repeat-containing protein At3g62890-like [Abrus precatorius]	AT5G48910.1_Pentatricopeptide repeat (PPR) superfamily protein, GeneName=LPA66	IPR002885_Pentatricopeptide repeat	0.133333	0.523333	0.463333	0.54	0.14	0.17	0.09	0.34	0.67	0.56	0.42	0.36	0.61	0.42	0.61	0.59
Am_HQ_507	5397	XP_004488589.1_myosin-12 isoform X1 [Cicer arietinum]	AT2G31900.4_myosin-like protein XIF, GeneName=XIF	IPR001609_Myosin head, motor domain; IPR027417_P-loop containing nucleoside triphosphate hydrolase; IPR004009_Myosin, N-terminal, SH3-like; IPR002710_Dilute domain; IPR000048_IQ motif, EF-hand binding site	1.36	2.26333	13.83	5.89667	1.16	1.98	0.94	2.01	3.12	1.66	13.02	15.36	13.11	4.69	8.19	4.81
Am_HQ_509	5398	PNY07310.1_Ty3/gypsy retrotransposon protein [Trifolium pratense] PNY07311.1 Ty3/gypsy retrotransposon protein [Trifolium pratense]	ATMG00860.1_DNA/RNA polymerases superfamily protein, GeneName=ORF158	IPR041588_Integrase zinc-binding domain; IPR016197_Chromo-like domain superfamily; IPR041577_Reverse transcriptase/retrotransposon-derived protein, RNase H-like domain; IPR005162_Retrotransposon gag domain; IPR021109_Aspartic peptidase domain superfamily; IPR012337_Ribonuclease H-like superfamily; IPR043502_DNA/RNA polymerase superfamily; IPR023780_Chromo domain; IPR000477_Reverse transcriptase d…	11.48	5.24333	6.82667	8.60333	11.5	11.9	11.04	3.83	5.45	6.45	8.81	6.08	5.59	6.99	9.5	9.32
Am_HQ_511	5450	XP_027187598.1_TMV resistance protein N-like [Cicer arietinum]	AT5G36930.3_Disease resistance protein (TIR-NBS-LRR class) family	IPR027417_P-loop containing nucleoside triphosphate hydrolase; IPR000157_Toll/interleukin-1 receptor homology (TIR) domain; IPR002182_NB-ARC; IPR036390_Winged helix DNA-binding domain superfamily; IPR035897_Toll/interleukin-1 receptor homology (TIR) domain superfamily	2.25667	2.31667	2.05	5.27667	2.07	3.58	1.12	3.11	2.04	1.8	1.87	1.97	2.31	5.76	4.26	5.81
Am_HQ_515	5453	XP_012568016.1_UDP-glucose:glycoprotein glucosyltransferase [Cicer arietinum]	AT1G71220.2_EMS-MUTAGENIZED BRI1 SUPPRESSOR 1, GeneName=EBS1	IPR009448_UDP-glucose:Glycoprotein Glucosyltransferase; IPR040692_UGGT, thioredoxin-like domain 3; IPR040693_UGGT, thioredoxin-like domain 1; IPR040694_UGGT, thioredoxin-like domain 2; IPR040497_Glucosyltransferase 24, catalytic domain; IPR029044_Nucleotide-diphospho-sugar transferases; IPR040525_UDP-glucose:glycoprotein glucosyltransferase, thioredoxin-like domain 4	13.0567	29.1567	35.77	30.5433	9.97	19.26	9.94	23.21	36.12	28.14	25.89	40.33	41.09	25.54	30.33	35.76
Am_HQ_516	5456	XP_012568314.1_ABC transporter C family member 2-like [Cicer arietinum] XP_012568316.1 ABC transporter C family member 2-like [Cicer arietinum] XP_012568318.1 ABC transporter C family member 2-like [Cicer arietinum] XP_012568323.1 ABC transporter C family member 2-like [Cicer arietinum]	AT2G34660.2_multidrug resistance-associated protein 2, GeneName=ABCC2	IPR027417_P-loop containing nucleoside triphosphate hydrolase; IPR011527_ABC transporter type 1, transmembrane domain; IPR003439_ABC transporter-like, ATP-binding domain; IPR003593_AAA+ ATPase domain; IPR036640_ABC transporter type 1, transmembrane domain superfamily	141.383	43.8767	99.1567	53.5733	164.91	165.41	93.83	38.18	50.02	43.43	74.63	103.82	119.02	47.22	60.46	53.04
Am_HQ_523	5380	XP_027356341.1_zinc finger CCCH domain-containing protein 19 [Abrus precatorius]	AT2G16485.2_GW repeat- and PHD finger-containing protein NERD, GeneName=NERD	IPR036128_Plus3-like superfamily; IPR011011_Zinc finger, FYVE/PHD-type; IPR004343_Plus-3 domain; IPR019835_SWIB domain; IPR035445_GYF-like domain superfamily; IPR003169_GYF domain; IPR001965_Zinc finger, PHD-type; IPR003121_SWIB/MDM2 domain; IPR036885_SWIB/MDM2 domain superfamily	42.32	46	34.4033	41.4967	49.11	33.25	44.6	44.93	47.32	45.75	25.04	40.34	37.83	38.49	41.04	44.96
Am_HQ_528	5437	PNX77125.1_retrovirus-related Pol polyprotein from transposon TNT 1-94 [Trifolium pratense]	AT3G54610.1_histone acetyltransferase of the GNAT family 1, GeneName=HAG1	IPR016181_Acyl-CoA N-acyltransferase; IPR000182_GNAT domain	3.06333	5.80667	4.17667	4.69	3.65	2.81	2.73	6.54	5.86	5.02	2.42	5.78	4.33	4.4	5.27	4.4
Am_HQ_529	5392	XP_027346076.1_E3 ubiquitin-protein ligase UPL1-like isoform X1 [Abrus precatorius]	AT1G55860.1_LOW protein: E3 ubiquitin ligase-like protein, GeneName=UPL1	IPR016024_Armadillo-type fold; IPR009060_UBA-like superfamily; IPR010314_E3 ubiquitin ligase, domain of unknown function DUF913; IPR015940_Ubiquitin-associated domain; IPR010309_E3 ubiquitin ligase, domain of unknown function DUF908	27.7967	28.68	22.9533	27.3733	33.96	31.17	18.26	25.92	33.28	26.84	5.11	32.25	31.5	14.57	25.83	41.72
Am_HQ_531	5431	XP_027367092.1_protein TIME FOR COFFEE isoform X2 [Abrus precatorius]	AT3G22380.1_time for coffee, GeneName=TIC	.	69.0467	37.8733	27.8967	35.59	71.58	53.27	82.29	40.08	40.16	33.38	9.61	37.65	36.43	30.72	38.61	37.44
Am_HQ_532	5403	XP_004511407.1_uncharacterized protein LOC101495944 isoform X2 [Cicer arietinum]	AT5G16680.1_RING/FYVE/PHD zinc finger superfamily protein	.	0.113333	0.00666667	0.0933333	0.09	0.18	0.07	0.09	0	0	0.02	0.17	0	0.11	0.12	0.11	0.04
Am_HQ_535	5373	XP_013469556.2_putative 1-phosphatidylinositol-3-phosphate 5-kinase FAB1D [Medicago truncatula] RHN81595.1 putative 1-phosphatidylinositol-3-phosphate 5-kinase [Medicago truncatula]	AT1G34260.2_FORMS APLOID AND BINUCLEATE CELLS 1A, GeneName=FAB1D	IPR002498_Phosphatidylinositol-4-phosphate 5-kinase, core; IPR027409_GroEL-like apical domain superfamily; IPR002423_Chaperonin Cpn60/GroEL/TCP-1 family	24.7533	24.64	19.3367	29.2133	16.53	34.05	23.68	23	18.55	32.37	11.2	22.15	24.66	33.38	29.48	24.78
Am_HQ_537	5426	BBG96384.1_ADP glucose pyrophosphorylase large subunit 1 [Prunus dulcis]	AT4G23160.3_cysteine-rich RECEPTOR-like kinase, GeneName=CRK8	.	3.37667	5.18667	3.85	4.65667	0.57	3.78	5.78	0.34	5.67	9.55	0.23	4.31	7.01	0.3	4.46	9.21
Am_HQ_541	5420	XP_012574596.1_transcription initiation factor TFIID subunit 1 isoform X2 [Cicer arietinum]	AT1G32750.1_HAC13 protein (HAC13), GeneName=HAF01	IPR009067_TAFII-230 TBP-binding; IPR022591_Transcription initiation factor TFIID subunit 1, domain of unknown function; IPR029071_Ubiquitin-like domain superfamily; IPR000626_Ubiquitin-like domain; IPR036741_TAFII-230 TBP-binding domain superfamily	19.1067	19.48	14.0633	15.67	20	19.63	17.69	19.26	20.71	18.47	8.51	17.08	16.6	12.74	15.88	18.39
Am_HQ_542	5419	XP_028246452.1_uncharacterized protein LOC114423773 isoform X1 [Glycine soja] KHN07203.1 Dual specificity protein kinase splA [Glycine soja] RZC00384.1 putative serine/threonine-protein kinase SIS8 isoform A [Glycine soja] RZC00385.1 putative serine/threonine-protein kinase SIS8 isoform B [Glycine soja]	AT3G24715.1_kinase superfamily with octicosapeptide/Phox/Bem1p domain-containing protein	IPR000270_PB1 domain; IPR001245_Serine-threonine/tyrosine-protein kinase, catalytic domain; IPR000719_Protein kinase domain; IPR011009_Protein kinase-like domain superfamily	1.45	8.26333	5.71	7.70667	0.56	2.03	1.76	9.12	7.02	8.65	4.13	5.59	7.41	6.28	6.84	10
Am_HQ_545	5404	ALP75636.1_putative replicase [Rehmannia mosaic virus]	.	IPR002588_Alphavirus-like methyltransferase (MT) domain; IPR027417_P-loop containing nucleoside triphosphate hydrolase; IPR027351_(+) RNA virus helicase core domain	0	0	0	0	0	0	0	0	0	0	0	0	0	0	0	0
Am_HQ_547	5409	GAU32947.1_hypothetical protein TSUD_153640 [Trifolium subterraneum]	AT4G37880.1_LisH/CRA/RING-U-box domains-containing protein	IPR001841_Zinc finger, RING-type; IPR006595_CTLH, C-terminal LisH motif; IPR013144_CRA domain; IPR024964_CTLH/CRA C-terminal to LisH motif domain; IPR027370_RING-type zinc-finger, LisH dimerisation motif	1.26667	2.68667	2.81333	1.86667	1.15	1.37	1.28	2.41	2.46	3.19	0.97	3.75	3.72	1.94	1.91	1.75
Am_HQ_549	5402	XP_013458436.1_myosin-17 [Medicago truncatula] KEH32467.1 DIL domain myosin family protein [Medicago truncatula] RHN64597.1 putative myosin ATPase [Medicago truncatula]	AT5G20490.2_myosin family protein with Dil, GeneName=XIK	IPR027417_P-loop containing nucleoside triphosphate hydrolase; IPR001609_Myosin head, motor domain; IPR000048_IQ motif, EF-hand binding site; IPR002710_Dilute domain; IPR004009_Myosin, N-terminal, SH3-like	60.8433	44.8333	41.25	35.2133	75.12	42.97	64.44	42.69	46.06	45.75	22.34	52.6	48.81	31.72	37	36.92
Am_HQ_550	5367	TKY53314.1_DNA-directed RNA polymerase I subunit rpa1 [Spatholobus suberectus]	AT3G57660.2_nuclear RNA polymerase A1, GeneName=NRPA1	IPR007080_RNA polymerase Rpb1, domain 1; IPR006592_RNA polymerase, N-terminal; IPR000722_RNA polymerase, alpha subunit; IPR007081_RNA polymerase Rpb1, domain 5; IPR007083_RNA polymerase Rpb1, domain 4; IPR007066_RNA polymerase Rpb1, domain 3	47.0033	17.0267	16.1267	21.1767	58.09	41.1	41.82	16.61	17.68	16.79	12.3	18.19	17.89	19.38	19.43	24.72
Am_HQ_551	5413	XP_004511407.1_uncharacterized protein LOC101495944 isoform X2 [Cicer arietinum]	AT5G16680.1_RING/FYVE/PHD zinc finger superfamily protein	IPR011011_Zinc finger, FYVE/PHD-type	8.90667	5.73667	5.73	8.85333	9.82	6.95	9.95	4.97	3.67	8.57	7.95	3.99	5.25	8.32	10.09	8.15
Am_HQ_553	5400	PNY16125.1_urate oxidase [Trifolium pratense]	AT2G26230.1_uricase / urate oxidase / nodulin 35	IPR002042_Uricase	25.8633	15.9233	16.3867	15.0733	23.76	26.69	27.14	19.33	10.92	17.52	20.56	11.31	17.29	18.59	10.02	16.61
Am_HQ_554	5381	XP_027191637.1_serine/arginine repetitive matrix protein 2-like [Cicer arietinum] XP_027191638.1 serine/arginine repetitive matrix protein 2-like [Cicer arietinum] XP_027191639.1 serine/arginine repetitive matrix protein 2-like [Cicer arietinum] XP_027191655.1 serine/arginine repetitive matrix protein 2-like [Cicer arietinum]	AT3G23900.2_RNA recognition motif (RRM)-containing protein	IPR000504_RNA recognition motif domain; IPR035979_RNA-binding domain superfamily; IPR014756_Immunoglobulin E-set; IPR017868_Filamin/ABP280 repeat-like; IPR001298_Filamin/ABP280 repeat	40.3333	28.0533	17.3267	23.0233	56.71	26.43	37.86	27.07	30.94	26.15	12.27	20.43	19.28	20.2	26.51	22.36
Am_HQ_558	5389	KAG5002651.1_hypothetical protein JHK86_026790 [Glycine max] KAG5150430.1 hypothetical protein JHK84_026902 [Glycine max] KAH1136302.1 hypothetical protein GYH30_026688 [Glycine max] KAH1136303.1 hypothetical protein GYH30_026688 [Glycine max]	AT2G47800.1_multidrug resistance-associated protein 4, GeneName=ABCC4	IPR027417_P-loop containing nucleoside triphosphate hydrolase; IPR003439_ABC transporter-like, ATP-binding domain; IPR036640_ABC transporter type 1, transmembrane domain superfamily; IPR011527_ABC transporter type 1, transmembrane domain; IPR003593_AAA+ ATPase domain	168.177	234.777	247.03	72.0067	79.66	238.85	186.02	136.76	248.18	319.39	80.07	342.5	318.52	75.5	65.74	74.78
Am_HQ_559	5358	GAU11823.1_hypothetical protein TSUD_75740, partial [Trifolium subterraneum]	AT1G74260.1_purine biosynthesis 4, GeneName=PUR4	IPR036921_PurM-like, N-terminal domain superfamily; IPR010073_Phosphoribosylformylglycinamidine synthase PurL; IPR036676_PurM-like, C-terminal domain superfamily; IPR041609_Phosphoribosylformylglycinamidine synthase, linker domain; IPR029062_Class I glutamine amidotransferase-like; IPR040707_Phosphoribosylformylglycinamidine synthase, N-terminal; IPR010918_PurM-like, C-terminal domain; IPR036604_…	49.9033	26.24	24.7267	26.0833	76.99	29.31	43.41	25.73	30.2	22.79	20.45	27.51	26.22	20.94	26.06	31.25
Am_HQ_560	5391	GAU13251.1_hypothetical protein TSUD_42050 [Trifolium subterraneum]	AT1G34260.4_FORMS APLOID AND BINUCLEATE CELLS 1A, GeneName=FAB1D	IPR002498_Phosphatidylinositol-4-phosphate 5-kinase, core	0.406667	1.07667	0.573333	1.25333	0.32	0.32	0.58	0.57	1.38	1.28	0	0.39	1.33	2.34	1.42	0
Am_HQ_561	5390	KAF1894937.1_hypothetical protein Lal_00022431 [Lupinus albus]	AT3G51690.1_PIF1 helicase	IPR027417_P-loop containing nucleoside triphosphate hydrolase; IPR010285_DNA helicase Pif1-like	8.40333	2.07333	2.64333	4.43	18.86	3.74	2.61	1.79	2.66	1.77	2.41	2.86	2.66	4.74	4.67	3.88
Am_HQ_562	5386	XP_004489757.1_inactive poly [ADP-ribose] polymerase RCD1-like [Cicer arietinum]	AT1G32230.3_WWE protein-protein interaction domain protein family, GeneName=RCD1	IPR004170_WWE domain; IPR037197_WWE domain superfamily	2.37333	3.11667	1.96667	2.79	2.14	2.84	2.14	2.02	4.62	2.71	0.5	2.62	2.78	1.91	3.8	2.66
Am_HQ_567	5238	XP_025688046.1_UBP1-associated protein 2C [Arachis hypogaea] XP_025688047.1 UBP1-associated protein 2C [Arachis hypogaea] XP_025688048.1 UBP1-associated protein 2C [Arachis hypogaea] XP_025688049.1 UBP1-associated protein 2C [Arachis hypogaea] QHO56849.1 UBP1-associated protein 2C [Arachis hypogaea] RYR68303.1 hypothetical protein Ahy_A03g014797 [Arachis hypogaea]	AT3G15010.2_RNA-binding (RRM/RBD/RNP motifs) family protein	IPR000504_RNA recognition motif domain; IPR035979_RNA-binding domain superfamily	3.47	6.04	4.94	6.21	4.26	4.03	2.12	4.71	6.07	7.34	2.03	4.83	7.96	4.61	6.19	7.83
Am_HQ_569	5337	GAU29333.1_hypothetical protein TSUD_227040 [Trifolium subterraneum]	AT5G47490.2_RGPR-like protein	IPR024298_Ancestral coatomer element 1, Sec16/Sec31; IPR024340_Sec16, central conserved domain	36.4767	34.98	28.5033	33.7	38.24	35.18	36.01	33.79	35.13	36.02	23.93	31.68	29.9	30.45	32.97	37.68
Am_HQ_571	5362	GAU18816.1_hypothetical protein TSUD_81050 [Trifolium subterraneum]	AT4G23160.3_cysteine-rich RECEPTOR-like kinase, GeneName=CRK8	IPR025724_GAG-pre-integrase domain; IPR001878_Zinc finger, CCHC-type; IPR013103_Reverse transcriptase, RNA-dependent DNA polymerase; IPR012337_Ribonuclease H-like superfamily; IPR036875_Zinc finger, CCHC-type superfamily; IPR043502_DNA/RNA polymerase superfamily; IPR001584_Integrase, catalytic core	19.9767	14.1667	8.33333	8.97	24.35	34.05	1.53	13.52	28.03	0.95	4.46	20.06	0.48	7.68	17.39	1.84
Am_HQ_575	5315	XP_045787929.1_uncharacterized protein LOC123883233 [Trifolium pratense]	AT3G48770.1_ATP/DNA binding protein	IPR036890_Histidine kinase/HSP90-like ATPase superfamily	1.38667	3.75667	5.42333	5.75	1.67	1.94	0.55	3.54	4.78	2.95	5.16	6.17	4.94	7.23	4.77	5.25
Am_HQ_576	5349	XP_027331290.1_ARF guanine-nucleotide exchange factor GNOM-like isoform X1 [Abrus precatorius]	AT1G13980.2_sec7 domain-containing protein, GeneName=GN	IPR032691_Guanine nucleotide exchange factor, N-terminal; IPR000904_Sec7 domain; IPR035999_Sec7 domain superfamily; IPR016024_Armadillo-type fold	12.0033	5.23333	8.35	9.19333	7.63	14.89	13.49	4.59	6.25	4.86	7.69	8.89	8.47	8.65	8.88	10.05
Am_HQ_577	5279	.	.	.	0	0	0	0	0	0	0	0	0	0	0	0	0	0	0	0
Am_HQ_578	5318	XP_012569237.1_LOW QUALITY PROTEIN: disease resistance protein RPP2B-like [Cicer arietinum]	AT5G36930.2_Disease resistance protein (TIR-NBS-LRR class) family	IPR027417_P-loop containing nucleoside triphosphate hydrolase; IPR000157_Toll/interleukin-1 receptor homology (TIR) domain; IPR036390_Winged helix DNA-binding domain superfamily; IPR002182_NB-ARC; IPR035897_Toll/interleukin-1 receptor homology (TIR)	1.34	1.76333	1.64667	4.5	1.5	1.74	0.78	0.83	2.09	2.37	1.16	1.97	1.81	2.47	5.65	5.38
Am_HQ_584	5334	KYP45237.1_Retrotransposable element Tf2 [Cajanus cajan]	AT5G27290.2_stress regulated protein	IPR005162_Retrotransposon gag domain	8.21333	9.65333	6.66	4.94	4.21	4.34	16.09	4.38	11.03	13.55	2.18	8.04	9.76	3	5.73	6.09
Am_HQ_588	5292	XP_045803097.1_ABC transporter B family member 20 isoform X2 [Trifolium pratense]	AT2G39480.1_P-glycoprotein 6, GeneName=ABCB6	IPR003593_AAA+ ATPase domain; IPR003439_ABC transporter-like, ATP-binding domain; IPR036640_ABC transporter type 1, transmembrane domain superfamily; IPR011527_ABC transporter type 1, transmembrane domain; IPR027417_P-loop containing nucleoside triphosphate hydrolase	25.9333	17.0267	9.3	15.4867	30.02	22.9	24.88	15.13	19.85	16.1	6.93	10.39	10.58	15.73	17	13.73
Am_HQ_589	5341	QYF11643.1_ABCC2, partial [Glycyrrhiza glabra]	AT3G21250.4_multidrug resistance-associated protein 6, GeneName=ABCC8	IPR011527_ABC transporter type 1, transmembrane domain; IPR036640_ABC transporter type 1, transmembrane domain superfamily	0.84	1.92667	5.59	0.146667	1.06	0.67	0.79	0.83	1.98	2.97	1.12	8.26	7.39	0	0.3	0.14
Am_HQ_593	5327	XP_012569146.1_sister chromatid cohesion 1 protein 4 isoform X1 [Cicer arietinum]	AT5G16270.1_sister chromatid cohesion 1 protein 4, GeneName=SYN4	IPR036390_Winged helix DNA-binding domain superfamily; IPR006909_Rad21/Rec8-like protein, C-terminal, eukaryotic; IPR006910_Rad21/Rec8-like protein, N-terminal	36.24	33.8867	26.0867	29.2767	26.62	32.5	49.6	31.6	36.89	33.17	17.25	29.2	31.81	23.01	31.38	33.44
Am_HQ_595	5320	XP_004490460.1_E3 ubiquitin-protein ligase UPL1-like [Cicer arietinum] XP_012568388.1 E3 ubiquitin-protein ligase UPL1-like [Cicer arietinum]	AT1G70320.1_ubiquitin-protein ligase 2, GeneName=UPL2	IPR015940_Ubiquitin-associated domain; IPR009060_UBA-like superfamily; IPR010314_E3 ubiquitin ligase, domain of unknown function DUF913; IPR016024_Armadillo-type fold; IPR010309_E3 ubiquitin ligase, domain of unknown function DUF908	37.28	28.33	18.0133	25.3867	46.87	45.08	19.89	26.62	33.72	24.65	2.6	24.59	26.85	10.37	25.17	40.62
Am_HQ_599	5335	XP_012571322.1_probable serine/threonine-protein kinase WNK4 [Cicer arietinum]	AT3G51630.2_with no lysine (K) kinase 5, GeneName=WNK5	IPR002885_Pentatricopeptide repeat	0.64	2.67333	3.08	2.69333	0.6	1.32	0	3.35	2.47	2.2	2.39	3.7	3.15	3.01	2.5	2.57
Am_HQ_601	5317	YP_009242955.1_RNA polymerase beta&apos;&apos; subunit [Astragalus mongholicus] YP_009760370.1 RNA polymerase beta&apos;&apos; subunit [Astragalus gummifer] AMQ99218.1 RNA polymerase beta&apos;&apos; subunit [Astragalus mongholicus] QIQ57173.1 RNA polymerase beta&apos;&apos; subunit [Astragalus gummifer] QTK20891.1 RNA polymerase beta&apos;&apos; subunit [Astragalus mongholicus]	ATCG00170.1_DNA-directed RNA polymerase family protein, GeneName=RPOC2	IPR007081_RNA polymerase Rpb1, domain 5; IPR007083_RNA polymerase Rpb1, domain 4; IPR012756_DNA-directed RNA polymerase, subunit beta''	0.09	0.146667	0.346667	0	0	0.1	0.17	0	0.24	0.2	0	0.33	0.71	0	0	0
Am_HQ_602	5291	XP_045787929.1_uncharacterized protein LOC123883233 [Trifolium pratense]	AT3G48770.1_ATP/DNA binding protein	IPR036890_Histidine kinase/HSP90-like ATPase superfamily	1.82333	1.90333	5.67	5.16	2.33	2.3	0.84	1.36	2.63	1.72	7.04	5.5	4.47	6.43	4.57	4.48
Am_HQ_603	5284	XP_004508906.1_protein transport protein SEC16B homolog [Cicer arietinum]	AT5G47490.2_RGPR-like protein	IPR024298_Ancestral coatomer element 1, Sec16/Sec31; IPR024340_Sec16, central conserved domain	3.61	11.7167	14.2133	10.2167	3.61	5.22	2	12.07	12.23	10.85	14.3	15.12	13.22	11.07	8.71	10.87
Am_HQ_604	5319	KHN21230.1_Retrovirus-related Pol polyprotein from transposon TNT 1-94, partial [Glycine soja]	AT4G23160.3_cysteine-rich RECEPTOR-like kinase, GeneName=CRK8	IPR001584_Integrase, catalytic core; IPR043502_DNA/RNA polymerase superfamily; IPR012337_Ribonuclease H-like superfamily; IPR013103_Reverse transcriptase, RNA-dependent DNA polymerase; IPR025724_GAG-pre-integrase domain	0.943333	1.30667	0.983333	0.49	1.48	0.41	0.94	1.21	1.54	1.17	0.5	0.57	1.88	0.21	0.58	0.68
Am_HQ_609	5362	TKY53167.1_virilizer protein [Spatholobus suberectus]	AT3G05680.2_embryo defective 2016, GeneName=EMB2016	IPR016024_Armadillo-type fold	14.68	16.3233	12.2367	14.05	16.22	9.42	18.4	15.66	15.77	17.54	6.94	12.52	17.25	9.79	11.21	21.15
Am_HQ_611	5189	XP_004511757.1_uncharacterized protein LOC101495726 [Cicer arietinum]	AT5G47020.1_MraZ	.	23.9967	25.11	13.6767	32.57	25.43	28.47	18.09	23.92	25.52	25.89	9.35	16.5	15.18	26.99	34.19	36.53
Am_HQ_612	5301	TKY56776.1_ARF guanine-nucleotide exchange factor GNOM [Spatholobus suberectus]	AT1G13980.2_sec7 domain-containing protein, GeneName=GN	IPR032691_Guanine nucleotide exchange factor, N-terminal; IPR000904_Sec7 domain; IPR016024_Armadillo-type fold; IPR035999_Sec7 domain superfamily	8.26333	6.64333	9.08	9.86333	9.34	8.54	6.91	5.87	6.75	7.31	7.65	10.1	9.49	7.8	9.98	11.81
Am_HQ_613	5304	XP_004510458.1_uncharacterized protein LOC101504749 isoform X1 [Cicer arietinum]	AT4G30100.1_P-loop containing nucleoside triphosphate hydrolases superfamily protein	IPR027417_P-loop containing nucleoside triphosphate hydrolase; IPR041677_DNA2/NAM7 helicase, helicase domain; IPR041679_DNA2/NAM7 helicase-like, C-terminal	15.96	14.02	13.4233	14.0567	20.77	15.73	11.38	14.2	15.4	12.46	8.22	17.06	14.99	13.06	14.4	14.71
Am_HQ_616	5244	PNX72910.1_RNA-binding (RRM/RBD/RNP motif) family protein [Trifolium pratense]	AT3G15010.2_RNA-binding (RRM/RBD/RNP motifs) family protein	IPR000504_RNA recognition motif domain; IPR035979_RNA-binding domain superfamily	0.506667	1.33	0.75	1.23333	0.56	0.96	0	1.83	2.16	0	0.57	1.68	0	1.71	1.99	0
Am_HQ_622	5286	XP_004486382.1_enhancer of mRNA-decapping protein 4-like [Cicer arietinum]	AT3G13300.1_Transducin/WD40 repeat-like superfamily protein, GeneName=VCS	IPR032401_Enhancer of mRNA-decapping protein 4, WD40 repeat region; IPR036322_WD40-repeat-containing domain superfamily; IPR001680_WD40 repeat	19.8467	27.3367	23.1967	34.4333	19.25	23.64	16.65	24.73	30.66	26.62	13.42	29.24	26.93	27.97	38.87	36.46
Am_HQ_624	5285	XP_027351673.1_myosin-6 [Abrus precatorius]	AT1G04160.1_myosin XI B, GeneName=XIB	IPR004009_Myosin, N-terminal, SH3-like; IPR001609_Myosin head, motor domain; IPR000048_IQ motif, EF-hand binding site; IPR002710_Dilute domain; IPR027417_P-loop containing nucleoside triphosphate hydrolase	0.103333	2.30333	3.56333	2.96333	0.15	0.14	0.02	2.48	2.69	1.74	3.19	3.63	3.87	3.07	1.99	3.83
Am_HQ_629	5220	XP_004496667.1_protein GFS12 [Cicer arietinum]	AT5G18525.1_protein serine/threonine kinase	IPR000409_BEACH domain; IPR001680_WD40 repeat; IPR036372_BEACH domain superfamily; IPR011009_Protein kinase-like domain superfamily; IPR036322_WD40-repeat-containing domain superfamily	17.0733	8.19	8.42667	6.76667	20.62	18.75	11.85	7.11	10.31	7.15	4.28	8.99	12.01	5.02	3.47	11.81
Am_HQ_634	5129	XP_045822044.1_uncharacterized protein LOC123914926 [Trifolium pratense]	AT5G42905.1_Polynucleotidyl transferase, ribonuclease H-like superfamily protein	.	1.22667	2.20333	2.61333	1.43	1.93	0.91	0.84	2.03	2.61	1.97	1.68	2.96	3.2	1.45	1.46	1.38
Am_HQ_636	5256	XP_027335159.1_uncharacterized protein LOC113849443 isoform X2 [Abrus precatorius]	AT1G01710.1_acyl-CoA thioesterase II	IPR000595_Cyclic nucleotide-binding domain; IPR029069_HotDog domain superfamily; IPR018490_Cyclic nucleotide-binding-like	1.27	5.73	1.79	2.36	0.6	2.51	0.7	4.72	6.46	6.01	0.7	2.26	2.41	1.64	2.23	3.21
Am_HQ_637	5257	XP_026393920.1_SKP1-like protein 1B [Papaver somniferum] XP_026396493.1 SKP1-like protein 1B [Papaver somniferum] RZC44959.1 hypothetical protein C5167_037912 [Papaver somniferum] RZC66754.1 hypothetical protein C5167_010448 [Papaver somniferum]	AT1G75950.1_S phase kinase-associated protein 1, GeneName=SKP1	IPR016072_SKP1 component, dimerisation; IPR016897_S-phase kinase-associated protein 1; IPR016073_SKP1 component, POZ domain; IPR001232_S-phase kinase-associated protein 1-like; IPR036296_SKP1-like, dimerisation domain superfamily; IPR011333_SKP1/BTB/POZ domain superfamily	6.00667	21.2633	15.18	19.7367	6.01	8.23	3.78	15.49	25.76	22.54	14.74	16.25	14.55	17.22	21.3	20.69
Am_HQ_641	5266	XP_003535178.1_isocitrate dehydrogenase [NAD] catalytic subunit 5, mitochondrial isoform X2 [Glycine max] XP_028185030.1 isocitrate dehydrogenase [NAD] catalytic subunit 5, mitochondrial [Glycine soja] KAG4982174.1 hypothetical protein JHK87_026923 [Glycine soja] KAG4996223.1 hypothetical protein JHK85_027662 [Glycine max] KAG5003027.1 hypothetical protein JHK86_027166 [Glycine max] KAG5126202.1 …	AT5G03290.1_isocitrate dehydrogenase V, GeneName=IDH-V	IPR024084_Isopropylmalate dehydrogenase-like domain	6.5	4.26	3.37	5.26333	5.37	9.75	4.38	3.43	4.93	4.42	1.76	4.29	4.06	4.5	4.71	6.58
Am_HQ_643	5267	XP_027192611.1_adenylyl-sulfate kinase, chloroplastic isoform X3 [Cicer arietinum] XP_027192612.1 adenylyl-sulfate kinase, chloroplastic isoform X3 [Cicer arietinum] XP_027192613.1 adenylyl-sulfate kinase, chloroplastic isoform X3 [Cicer arietinum]	AT2G14750.1_APS kinase, GeneName=APK	IPR021109_Aspartic peptidase domain superfamily	2.3	10.8733	5.99	5.42	3.55	2.17	1.18	13.11	8.7	10.81	2.62	8.25	7.1	4.38	7.58	4.3
Am_HQ_644	5269	.	AT2G21230.2_Basic-leucine zipper (bZIP) transcription factor family protein	.	2.45667	5.14	2.23667	2.68667	3.07	2.92	1.38	5.18	5.15	5.09	0.39	2.59	3.73	2.08	3.33	2.65
Am_HQ_654	5213	XP_003533954.1_mediator of RNA polymerase II transcription subunit 23 [Glycine max] KAG5133698.1 hypothetical protein JHK82_024886 [Glycine max] KAH1042701.1 hypothetical protein GYH30_024823 [Glycine max] KRH38271.1 hypothetical protein GLYMA_09G123500v4 [Glycine max]	AT1G23230.3_mediator of RNA polymerase II transcription subunit	IPR021629_Mediator complex, subunit Med23	18.0233	25.97	21.1367	30.11	20.21	22.42	11.44	24.04	28.82	25.05	13.54	24.38	25.49	25.79	30.86	33.68
Am_HQ_656	5242	XP_045826463.1_uncharacterized protein LOC123918448 isoform X1 [Trifolium pratense] XP_045826464.1 uncharacterized protein LOC123918448 isoform X2 [Trifolium pratense]	AT4G27190.1_NB-ARC domain-containing disease resistance protein	IPR003593_AAA+ ATPase domain; IPR002182_NB-ARC; IPR027417_P-loop containing nucleoside triphosphate hydrolase	4.01333	4.18667	3.17333	7.36667	2.55	6.21	3.28	3.77	6.59	2.2	1.89	4.7	2.93	5.46	11.16	5.48
Am_HQ_657	5240	AMM06269.1_&apos;photosystem I P700 apoprotein A1 [Vicia sativa]	ATCG00350.1_Photosystem I, PsaA/PsaB protein, GeneName=PSAA	IPR001280_Photosystem I PsaA/PsaB; IPR006243_Photosystem I PsaA; IPR036408_Photosystem I PsaA/PsaB superfamily	0.0733333	17.1167	7.62333	2.68667	0.13	0.06	0.03	46.82	2.25	2.28	2.67	12.31	7.89	3.63	1.59	2.84
Am_HQ_659	5201	XP_014518263.1_splicing factor 3B subunit 1 [Vigna radiata var. radiata]	AT5G64270.1_splicing factor	IPR015016_Splicing factor 3B subunit 1; IPR016024_Armadillo-type fold; IPR034085_TOG domain	9.00667	14.4033	11.3767	14.3533	9.97	12.89	4.16	16.33	17.96	8.92	7.34	17.19	9.6	11.35	21.09	10.62
Am_HQ_665	5233	XP_045803476.1_lysine-specific demethylase JMJ705 [Trifolium pratense]	AT3G48430.1_relative of early flowering 6, GeneName=REF6	IPR003347_JmjC domain; IPR003349_JmjN domain	2.26667	1.46	2.07	2.79667	2.66	3.09	1.05	1.44	1.73	1.21	1.97	2.29	1.95	2.55	2.21	3.63
Am_HQ_666	5185	TKY51603.1_lysine-specific demethylase ELF6 [Spatholobus suberectus]	AT5G04240.1_Zinc finger (C2H2 type) family protein / transcription factor jumonji (jmj) family protein, GeneName=ELF6	IPR036236_Zinc finger C2H2 superfamily; IPR003349_JmjN domain; IPR003347_JmjC domain; IPR013087_Zinc finger C2H2-type	4.84	7.08333	4.62333	5.78333	7.57	3.12	3.83	7.56	7.22	6.47	3.77	5.18	4.92	5.29	6.07	5.99
Am_HQ_669	5227	XP_024631071.1_myosin-15-like isoform X1 [Medicago truncatula] RHN77093.1 putative myosin ATPase [Medicago truncatula]	AT4G33200.1_myosin, GeneName=XI-I	IPR027417_P-loop containing nucleoside triphosphate hydrolase; IPR002710_Dilute domain; IPR000048_IQ motif, EF-hand binding site; IPR004009_Myosin, N-terminal, SH3-like; IPR001609_Myosin head, motor domain	11.96	21.24	13.4667	12.35	14.87	9	12.01	24.22	21.21	18.29	7.93	15.77	16.7	12.14	11.83	13.08
Am_HQ_670	5188	PNY10806.1_histone deacetylase [Trifolium pratense]	AT4G23160.3_cysteine-rich RECEPTOR-like kinase, GeneName=CRK8	IPR025724_GAG-pre-integrase domain; IPR001584_Integrase, catalytic core; IPR012337_Ribonuclease H-like superfamily	5.51333	25.47	15.0867	13.9467	5.98	6.28	4.28	31.74	27.37	17.3	20.67	14.89	9.7	12.28	16.69	12.87
Am_HQ_671	5220	XP_004509565.1_alpha-glucan water dikinase, chloroplastic isoform X2 [Cicer arietinum]	AT1G10760.1_Pyruvate phosphate dikinase, PEP/pyruvate binding domain-containing protein, GeneName=SEX1	IPR002192_Pyruvate phosphate dikinase, AMP/ATP-binding; IPR010666_Zinc finger, GRF-type	11.3767	54.4033	12.7933	31.6633	14.69	17.24	2.2	45.51	61.17	56.53	5.94	15.84	16.6	22.64	28.2	44.15
Am_HQ_673	5210	RZB71032.1_LINE-1 retrotransposable element ORF2 protein [Glycine soja]	AT4G29090.1_Ribonuclease H-like superfamily protein	.	0.37	4.03333	2.20333	2.23667	0.28	0.83	0	4.23	3.58	4.29	2.17	3.02	1.42	1.73	2.27	2.71
Am_HQ_675	5171	GAU14040.1_hypothetical protein TSUD_168640 [Trifolium subterraneum]	AT3G02260.1_auxin transport protein (BIG), GeneName=BIG	IPR025704_E3 ubiquitin ligase UBR4, C-terminal; IPR016024_Armadillo-type fold	73.85	31.91	32.3	48.9367	71.59	81.43	68.53	27.9	34.17	33.66	29.5	35.26	32.14	45.73	49.55	51.53
Am_HQ_677	5219	GAU17617.1_hypothetical protein TSUD_254920 [Trifolium subterraneum]	AT1G24290.1_AAA-type ATPase family protein	IPR015940_Ubiquitin-associated domain; IPR003959_ATPase, AAA-type, core; IPR032423_AAA C-terminal domain; IPR009060_UBA-like superfamily; IPR027417_P-loop containing nucleoside triphosphate hydrolase; IPR003593_AAA+ ATPase domain; IPR008921_DNA polymerase III, clamp loader complex, gamma/delta/delta subunit, C-terminal; IPR021886_MgsA AAA+ ATPase C-terminal	0.756667	1.80333	1.42333	1.92	1.22	0.62	0.43	1.05	2.35	2.01	1.12	1.88	1.27	1.02	2.37	2.37
Am_HQ_678	5201	QYF11629.1_ABCB33, partial [Glycyrrhiza glabra]	AT3G55320.1_P-glycoprotein 20, GeneName=ABCB20	IPR027417_P-loop containing nucleoside triphosphate hydrolase; IPR003439_ABC transporter-like, ATP-binding domain; IPR003593_AAA+ ATPase domain; IPR011527_ABC transporter type 1, transmembrane domain; IPR036640_ABC transporter type 1, transmembrane domain superfamily	25.93	17.2633	14.47	14.97	30.43	19.15	28.21	15.55	20.03	16.21	12.78	15.29	15.34	12.96	15.37	16.58
Am_HQ_679	5158	XP_004493976.1_ethylene-insensitive protein 2 [Cicer arietinum]	AT5G03280.1_NRAMP metal ion transporter family protein, GeneName=EIN2	IPR017187_Ethylene-insensitive protein 2; IPR001046_NRAMP family	26.2367	25.7867	9.55333	32.9167	23.83	30.26	24.62	25.64	27.05	24.67	10.51	9.99	8.16	31.84	26.86	40.05
Am_HQ_683	5172	KAA0053391.1_reverse transcriptase [Cucumis melo var. makuwa]	.	.	0.556667	0.266667	0.366667	0.296667	0.7	0.61	0.36	0.21	0.43	0.16	0.13	0.64	0.33	0.54	0.17	0.18
Am_HQ_684	5232	XP_004496667.1_protein GFS12 [Cicer arietinum]	AT5G18525.1_protein serine/threonine kinase	IPR001680_WD40 repeat; IPR036322_WD40-repeat-containing domain superfamily	0.4	0.35	0.253333	0.48	0.3	0.9	0	0.28	0.16	0.61	0.2	0.16	0.4	0.8	0.31	0.33
Am_HQ_685	4992	XP_004510308.1_ABC transporter G family member 36-like [Cicer arietinum]	AT1G59870.1_ABC-2 and Plant PDR ABC-type transporter family protein, GeneName=PEN3	IPR027417_P-loop containing nucleoside triphosphate hydrolase; IPR029481_ABC-transporter, N-terminal domain; IPR043926_ABC transporter family G domain; IPR013581_Plant PDR ABC transporter associated; IPR003593_AAA+ ATPase domain; IPR013525_ABC-2 type transporter; IPR003439_ABC transporter-like, ATP-binding domain	233.277	356.197	120.23	271.117	243.09	265.83	190.91	318.24	367.33	383.02	48.26	144.59	167.84	247.82	241.74	323.79
Am_HQ_687	5212	BAT86006.1_hypothetical protein VIGAN_04361500 [Vigna angularis var. angularis]	AT1G13980.2_sec7 domain-containing protein, GeneName=GN	IPR016024_Armadillo-type fold; IPR000904_Sec7 domain; IPR035999_Sec7 domain superfamily; IPR032691_Guanine nucleotide exchange factor, N-terminal	2.16667	7.97333	5.01	9.71667	2.12	3.13	1.25	6.24	9.79	7.89	3.1	6.25	5.68	6.19	11.49	11.47
Am_HQ_689	5224	XP_004496667.1_protein GFS12 [Cicer arietinum]	AT5G18525.1_protein serine/threonine kinase	IPR036322_WD40-repeat-containing domain superfamily; IPR001680_WD40 repeat	11.8067	9.28333	7.93667	9.77333	14.23	14.57	6.62	7.91	12.7	7.24	3.45	11.38	8.98	7.28	14.05	7.99
Am_HQ_690	5199	PNY10782.1_pentatricopeptide repeat-containing protein, partial [Trifolium pratense]	AT1G64430.3_Pentatricopeptide repeat (PPR) superfamily protein	.	1.19333	3.88	2.84667	1.4	1.12	0.92	1.54	4.4	4.74	2.5	2.15	3.81	2.58	1.71	1.11	1.38
Am_HQ_691	5196	XP_004508906.1_protein transport protein SEC16B homolog [Cicer arietinum]	AT5G47490.2_RGPR-like protein	IPR024340_Sec16, central conserved domain; IPR024298_Ancestral coatomer element 1, Sec16/Sec31	0	0	0.0666667	0	0	0	0	0	0	0	0	0	0.2	0	0	0
Am_HQ_692	5124	XP_027360027.1_far upstream element-binding protein 1-like isoform X2 [Abrus precatorius]	AT4G10070.1_KH domain-containing protein	IPR036612_K Homology domain, type 1 superfamily; IPR004088_K Homology domain, type 1; IPR004087_K Homology domain	1.88667	11.05	6.67	8.73667	2	2.41	1.25	13.25	10.38	9.52	3.73	8.81	7.47	8.31	8.57	9.33
Am_HQ_693	5159	XP_004492112.1_uncharacterized protein LOC101494130 [Cicer arietinum]	AT3G12590.1_hypothetical protein	.	1.70333	2.39667	1.69333	1.59333	0.81	1.67	2.63	1.67	2.43	3.09	1.86	1.49	1.73	1.53	1.16	2.09
Am_HQ_697	5208	XP_004503669.1_uncharacterized protein LOC101513289 [Cicer arietinum]	AT4G11270.1_Transducin/WD40 repeat-like superfamily protein	IPR036322_WD40-repeat-containing domain superfamily; IPR016024_Armadillo-type fold; IPR001680_WD40 repeat	4.41	9.20333	8.78333	11.11	3.7	5.14	4.39	8.17	11.2	8.24	6.77	10.59	8.99	9.67	11.35	12.31
Am_HQ_699	5188	AFK44590.1_unknown [Lotus japonicus]	AT5G24670.1_Cytidine/deoxycytidylate deaminase family protein, GeneName=EMB2820	IPR002125_Cytidine and deoxycytidylate deaminase domain; IPR016193_Cytidine deaminase-like	0	3.14333	1.47667	2.36	0	0	0	2.13	6.74	0.56	0	3.37	1.06	0	5.46	1.62
Am_HQ_702	5187	GAU10196.1_hypothetical protein TSUD_418680, partial [Trifolium subterraneum]	ATMG00860.1_DNA/RNA polymerases superfamily protein, GeneName=ORF158	IPR036875_Zinc finger, CCHC-type superfamily; IPR021109_Aspartic peptidase domain superfamily	0.356667	4.66	1.10333	1.29333	0.46	0.31	0.3	6.03	4.04	3.91	0.73	1.61	0.97	1.07	1.4	1.41
Am_HQ_704	5194	XP_004496667.1_protein GFS12 [Cicer arietinum]	AT5G18525.1_protein serine/threonine kinase	IPR000409_BEACH domain; IPR036372_BEACH domain superfamily; IPR011009_Protein kinase-like domain superfamily	0.106667	0.11	0.21	0.46	0	0	0.32	0	0	0.33	0.22	0.41	0	0.67	0.71	0
Am_HQ_705	5181	GAU16533.1_hypothetical protein TSUD_167640 [Trifolium subterraneum]	AT3G24500.1_multiprotein bridging factor 1C, GeneName=MBF1C	IPR036875_Zinc finger, CCHC-type superfamily; IPR012337_Ribonuclease H-like superfamily; IPR025724_GAG-pre-integrase domain; IPR043502_DNA/RNA polymerase superfamily; IPR001878_Zinc finger, CCHC-type; IPR013103_Reverse transcriptase, RNA-dependent DNA polymerase; IPR001584_Integrase, catalytic core	63.9733	79.4333	45.8267	95.4667	19.44	104.1	68.38	17.51	200.75	20.04	13.59	95.82	28.07	19.52	246.29	20.59
Am_HQ_706	5177	XP_045825244.1_clustered mitochondria protein [Trifolium pratense]	AT3G52140.2_tetratricopeptide repeat (TPR)-containing protein, GeneName=NOXY38	IPR033646_CLU central domain; IPR023231_GSKIP domain superfamily; IPR007967_GSKIP domain; IPR025697_CLU domain	1.47	2.43667	0.946667	2.07667	3.64	0	0.77	3.49	0	3.82	0.69	0.26	1.89	1.51	0.09	4.63
Am_HQ_707	5181	XP_003597955.1_mediator of RNA polymerase II transcription subunit 15a isoform X1 [Medicago truncatula] AES68206.1 transcription cofactor, putative [Medicago truncatula] RHN76558.1 putative coactivator CBP, KIX domain-containing protein [Medicago truncatula]	AT1G15780.1_mediator of RNA polymerase II transcription subunit 15a-like protein, GeneName=NRB4	.	11.7167	14.4233	13.4033	11.78	10.18	6.18	18.79	14.62	6.73	21.92	10.47	6.34	23.4	12.16	6.01	17.17
Am_HQ_708	5160	XP_027186288.1_protein WHAT&apos;S THIS FACTOR 9, mitochondrial [Cicer arietinum]	AT2G39120.1_Ubiquitin carboxyl-terminal hydrolase family protein, GeneName=WTF9	IPR021099_Plant organelle RNA recognition domain	0.763333	2.95333	1.34333	1.82667	0.88	0.71	0.7	3.13	3.63	2.1	0.93	1.8	1.3	1.45	2.25	1.78
Am_HQ_709	5178	GAU34331.1_hypothetical protein TSUD_20380 [Trifolium subterraneum]	AT1G35660.1_erythroid differentiation factor-like protein	.	1.93333	3.22667	1.77333	2.79	1.08	3.35	1.37	2.61	5.15	1.92	2.6	2.14	0.58	1.62	4.46	2.29
Am_HQ_711	5092	XP_004497459.1_E3 ubiquitin-protein ligase UPL4 [Cicer arietinum] XP_004497460.1 E3 ubiquitin-protein ligase UPL4 [Cicer arietinum] XP_027189850.1 E3 ubiquitin-protein ligase UPL4 [Cicer arietinum]	AT5G02880.1_ubiquitin-protein ligase 4, GeneName=UPL4	IPR000569_HECT domain; IPR035983_HECT, E3 ligase catalytic domain; IPR016024_Armadillo-type fold	37.04	26.9233	31.1667	32.9867	43.59	36.47	31.06	25.21	28.74	26.82	20.69	36.78	36.03	28.4	37.92	32.64
Am_HQ_712	5029	QYF11656.1_ABCC15, partial [Glycyrrhiza glabra]	AT3G60160.1_multidrug resistance-associated protein 9, GeneName=ABCC9	IPR003439_ABC transporter-like, ATP-binding domain; IPR036640_ABC transporter type 1, transmembrane domain superfamily; IPR003593_AAA+ ATPase domain; IPR027417_P-loop containing nucleoside triphosphate hydrolase; IPR011527_ABC transporter type 1, transmembrane domain	103.21	28.1467	54.8767	12.9	104.57	86.98	118.08	22.82	29.56	32.06	27.3	64.94	72.39	4.22	7	27.48
Am_HQ_717	5167	XP_004515667.1_uncharacterized protein LOC101488965 isoform X2 [Cicer arietinum]	AT1G77800.4_PHD finger family protein	IPR011011_Zinc finger, FYVE/PHD-type; IPR001965_Zinc finger, PHD-type	20.0333	51.66	33.29	30.5	22.9	20.25	16.95	48.87	48.88	57.23	16.7	38.78	44.39	24.88	31.22	35.4
Am_HQ_719	5156	XP_027343313.1_vacuolar sorting protein 18 isoform X1 [Abrus precatorius] XP_027343320.1 vacuolar sorting protein 18 isoform X1 [Abrus precatorius]	AT1G12470.1_zinc ion binding protein	IPR007810_Pep3/Vps18/deep orange	0.0833333	0.233333	0.123333	0.136667	0.15	0	0.1	0.31	0.25	0.14	0.17	0.09	0.11	0.08	0.29	0.04
Am_HQ_720	5050	KAG5145335.1_hypothetical protein JHK84_030878 [Glycine max]	AT5G16680.1_RING/FYVE/PHD zinc finger superfamily protein	IPR011011_Zinc finger, FYVE/PHD-type; IPR001965_Zinc finger, PHD-type	6.41667	14.0233	10.6867	17.4233	5.5	9.56	4.19	11.65	15.84	14.58	8.02	11.64	12.4	13.68	19.86	18.73
Am_HQ_722	5152	KHN45699.1_F-box protein PP2-A15 [Glycine soja]	AT3G53000.1_phloem protein 2-A15, GeneName=PP2-A15	IPR025886_Phloem protein 2-like	16.9667	8.86667	5.23	5.67	11.23	27.64	12.03	8.33	10.53	7.74	3.66	6.31	5.72	6.24	4.95	5.82
Am_HQ_723	5105	TKY62648.1_DNA helicase INO80 [Spatholobus suberectus]	AT3G57300.1_DNA helicase INO80-like protein, GeneName=INO80	IPR027417_P-loop containing nucleoside triphosphate hydrolase; IPR020838_DBINO domain; IPR001650_Helicase, C-terminal; IPR014001_Helicase superfamily 1/2, ATP-binding domain; IPR000330_SNF2, N-terminal	9.56667	17.5433	15.9467	21.0733	8.77	12.46	7.47	15.29	18.99	18.35	10.58	17.94	19.32	16.89	19.59	26.74
Am_HQ_724	5109	KAH1067939.1_hypothetical protein GYH30_005792 [Glycine max]	ATMG00860.1_DNA/RNA polymerases superfamily protein, GeneName=ORF158	IPR012337_Ribonuclease H-like superfamily	2.10667	2.70667	2.73333	2.83667	2.38	1.73	2.21	2.78	2.21	3.13	2.48	2.37	3.35	2.75	1.99	3.77
Am_HQ_727	5160	XP_045818870.1_cleavage and polyadenylation specificity factor subunit 1 [Trifolium pratense]	AT5G51660.1_cleavage and polyadenylation specificity factor 160, GeneName=CPSF160	IPR018846_Cleavage/polyadenylation specificity factor, A subunit, N-terminal; IPR004871_Cleavage/polyadenylation specificity factor, A subunit, C-terminal	5.95667	11.7233	8.91	14.2533	9.01	6.57	2.29	11.41	13.4	10.36	6.67	10.19	9.87	9.87	13.77	19.12
Am_HQ_728	5137	KAG4399399.1_hypothetical protein GLYMA_08G222400v4 [Glycine max]	AT4G31480.6_Coatomer, beta subunit	IPR016460_Coatomer beta subunit (COPB1); IPR011710_Coatomer beta subunit, C-terminal; IPR016024_Armadillo-type fold; IPR029446_Coatomer beta subunit, appendage platform domain; IPR002553_Clathrin/coatomer adaptor, adaptin-like, N-terminal	0.943333	0.873333	0.816667	1.16333	1.01	0.77	1.05	0.83	1.36	0.43	1.17	0.86	0.42	0.95	1.65	0.89
Am_HQ_729	5160	XP_004493407.1_ferredoxin-dependent glutamate synthase, chloroplastic [Cicer arietinum]	AT5G04140.2_glutamate synthase 1, GeneName=GLU1	IPR006982_Glutamate synthase, central-N; IPR036485_Glutamate synthase, alpha subunit, C-terminal domain superfamily; IPR002489_Glutamate synthase, alpha subunit, C-terminal; IPR002932_Glutamate synthase domain	12.5733	124.477	19.3867	20.86	20.72	16.53	0.47	210.64	153.73	9.06	25.92	30.8	1.44	34.26	26	2.32
Am_HQ_731	5169	XP_027188137.1_chromodomain-helicase-DNA-binding protein 3-like isoform X1 [Cicer arietinum]	AT1G08060.3_ATP-dependent helicase family protein, GeneName=MOM	IPR027417_P-loop containing nucleoside triphosphate hydrolase; IPR001965_Zinc finger, PHD-type; IPR016197_Chromo-like domain superfamily; IPR000953_Chromo/chromo shadow domain	3.14667	4.82	4.32667	8.83	1.57	6.52	1.35	4.03	5.32	5.11	3.43	4.86	4.69	7.56	8.8	10.13
Am_HQ_732	5159	PNX96991.1_retrotransposon-related protein [Trifolium pratense]	AT4G23160.3_cysteine-rich RECEPTOR-like kinase, GeneName=CRK8	IPR036875_Zinc finger, CCHC-type superfamily; IPR025724_GAG-pre-integrase domain; IPR001878_Zinc finger, CCHC-type; IPR013103_Reverse transcriptase, RNA-dependent DNA polymerase; IPR043502_DNA/RNA polymerase superfamily; IPR001584_Integrase, catalytic core; IPR012337_Ribonuclease H-like superfamily	11.08	43.03	12.09	12.48	9.48	5.81	17.95	39.11	38.57	51.41	7.51	12.06	16.7	10.74	8.76	17.94
Am_HQ_733	5157	KAE9585336.1_putative transcription factor C2H2 family [Lupinus albus] KAF1866819.1 hypothetical protein Lal_00018204 [Lupinus albus]	AT5G22000.1_RING-H2 group F2A, GeneName=RHF2A	IPR001841_Zinc finger, RING-type	2.19667	3.59667	2.8	3.10667	2.21	3.02	1.36	5.04	3.21	2.54	1.92	3.57	2.91	3.66	3.45	2.21
Am_HQ_734	5152	XP_028763068.1_TMV resistance protein N-like [Prosopis alba]	AT5G36930.3_Disease resistance protein (TIR-NBS-LRR class) family	.	3.6	5.56667	1.94	4.54333	3.58	3.06	4.16	5.15	7	4.55	0.64	2.06	3.12	4.14	5.66	3.83
Am_HQ_738	5151	GAU26239.1_hypothetical protein TSUD_224300 [Trifolium subterraneum]	AT1G19260.1_TTF-type zinc finger protein with HAT dimerization domain-containing protein	IPR036691_Endonuclease/exonuclease/phosphatase superfamily	1.28333	5.31	3.09667	3.45	1.12	1.69	1.04	5.9	5.12	4.91	1.79	3.5	4	3.96	3.48	2.91
Am_HQ_740	5149	XP_004497106.1_uncharacterized protein LOC101503192 [Cicer arietinum]	AT1G13340.1_Regulator of Vps4 activity in the MVB pathway protein	IPR005061_Vacuolar protein sorting-associated protein Ist1	6.31	3.78333	0.413333	4.32333	1.78	4.62	12.53	7.19	1.58	2.58	0.38	0.44	0.42	10.88	0.44	1.65
Am_HQ_742	5144	XP_027190692.1_ABC transporter C family member 12-like [Cicer arietinum]	AT1G30410.2_multidrug resistance-associated protein 13, GeneName=ABCC12	IPR011527_ABC transporter type 1, transmembrane domain; IPR003439_ABC transporter-like, ATP-binding domain; IPR036640_ABC transporter type 1, transmembrane domain superfamily; IPR003593_AAA+ ATPase domain; IPR027417_P-loop containing nucleoside triphosphate hydrolase	0.146667	2.99333	1.11333	3.83	0.05	0.39	0	3.01	3.4	2.57	1.42	0.27	1.65	6.48	1.48	3.53
Am_HQ_744	5129	GAU29323.1_hypothetical protein TSUD_226940 [Trifolium subterraneum]	AT4G17330.3_G2484-1 protein, GeneName=G2484-1	.	17.6633	21.8667	14.7467	20.7933	20.74	21.23	11.02	21.28	25.96	18.36	3.88	20.95	19.41	13.55	22.42	26.41
Am_HQ_748	5135	XP_004489119.1_LOW QUALITY PROTEIN: protein SWEETIE [Cicer arietinum]	AT1G67140.3_HEAT repeat-containing protein, GeneName=SWEETIE	.	34.0267	15.52	21.78	22.7433	38.6	28.66	34.82	15.24	19.99	11.33	20.96	25.15	19.23	22.71	22.83	22.69
Am_HQ_750	5136	GAU46228.1_hypothetical protein TSUD_374740 [Trifolium subterraneum]	AT5G26360.1_TCP-1/cpn60 chaperonin family protein	IPR005162_Retrotransposon gag domain; IPR036875_Zinc finger, CCHC-type superfamily	0.18	0.503333	0.253333	0.266667	0.35	0.07	0.12	0.52	0.76	0.23	0.03	0.34	0.39	0.1	0.27	0.43
Am_HQ_751	5055	XP_045818928.1_transcriptional elongation regulator MINIYO [Trifolium pratense]	AT4G38440.1_RPAP1-like, carboxy-terminal protein, GeneName=IYO	IPR013930_RNA polymerase II-associated protein 1, N-terminal; IPR016024_Armadillo-type fold; IPR013929_RNA polymerase II-associated protein 1, C-terminal	17.09	15.4733	9.15	16.4733	31.01	13.17	7.09	14.34	17.69	14.39	6.31	11.33	9.81	13.65	18.53	17.24
Am_HQ_753	4964	XP_004516411.1_uncharacterized protein LOC101505434 isoform X1 [Cicer arietinum]	AT3G61690.3_nucleotidyltransferase	IPR043519_Nucleotidyltransferase superfamily	17.0933	23.36	21.8233	23.07	18.72	15.14	17.42	23.66	24.78	21.64	16.44	24.51	24.52	19.81	25.59	23.81
Am_HQ_754	5130	XP_004515844.1_lysine-specific demethylase REF6-like [Cicer arietinum]	AT3G48430.1_relative of early flowering 6, GeneName=REF6	.	0.74	0.563333	0.28	0.55	0.97	0.62	0.63	0.39	0.62	0.68	0.05	0.53	0.26	0.34	0.58	0.73
Am_HQ_755	5076	MCH79686.1_retrovirus-related Pol polyprotein from transposon TNT 1-94 [Trifolium medium]	AT4G23160.3_cysteine-rich RECEPTOR-like kinase, GeneName=CRK8	IPR001584_Integrase, catalytic core; IPR012337_Ribonuclease H-like superfamily	6.07667	3.39667	4.60333	4.06667	5.87	4.28	8.08	3.43	4.72	2.04	4.09	5.37	4.35	5.8	2.3	4.1
Am_HQ_756	4998	XP_013464591.1_increased DNA methylation 1 [Medicago truncatula] XP_024632259.1 increased DNA methylation 1 [Medicago truncatula] KEH38626.1 RING/FYVE/PHD zinc finger protein [Medicago truncatula] RHN74984.1 putative histone acetyltransferase chromatin regulator PHD family [Medicago truncatula]	AT3G14980.3_Acyl-CoA N-acyltransferase with RING/FYVE/PHD-type zinc finger protein, GeneName=ROS4	IPR032308_Jas TPL-binding domain	3.62333	6.89	9.29333	7.53333	3.45	3.7	3.72	7.16	7.2	6.31	10.26	9.28	8.34	7.38	7.15	8.07
Am_HQ_758	5125	XP_045805935.1_ubiquinol oxidase 4, chloroplastic/chromoplastic [Trifolium pratense]	AT4G22260.1_Alternative oxidase family protein, GeneName=IM	.	1.87333	2.25667	2.98667	1.47333	1.36	1.91	2.35	1.72	2.18	2.87	0.92	3.39	4.65	0.98	1.34	2.1
Am_HQ_760	5057	TKY75229.1_Zinc finger CCCH domain-containing protein 6 [Spatholobus suberectus]	AT1G19860.1_Zinc finger C-x8-C-x5-C-x3-H type family protein	.	1.43667	2.51333	1.66667	1.64333	2.05	1.05	1.21	2.13	3.35	2.06	0.44	1.92	2.64	1.3	1.4	2.23
Am_HQ_765	5188	XP_004510308.1_ABC transporter G family member 36-like [Cicer arietinum]	AT1G59870.1_ABC-2 and Plant PDR ABC-type transporter family protein, GeneName=PEN3	IPR013581_Plant PDR ABC transporter associated; IPR013525_ABC-2 type transporter; IPR027417_P-loop containing nucleoside triphosphate hydrolase; IPR029481_ABC-transporter, N-terminal domain; IPR043926_ABC transporter family G domain; IPR003439_ABC transporter-like, ATP-binding domain; IPR003593_AAA+ ATPase domain	14.2667	20.4367	7.22	13.3	1.57	40.24	0.99	1.55	56.11	3.65	0	20.71	0.95	2.42	35.62	1.86
Am_HQ_766	5083	RZB83739.1_tRNA-specific adenosine deaminase TAD3 isoform G [Glycine soja] RZB83740.1 tRNA-specific adenosine deaminase TAD3 isoform H [Glycine soja]	AT5G24670.1_Cytidine/deoxycytidylate deaminase family protein, GeneName=EMB2820	.	4.63333	16.25	8.98333	21.63	1.17	8.6	4.13	6.07	35.36	7.32	3.9	12.7	10.35	6.11	53.32	5.46
Am_HQ_768	5052	PNY03667.1_pentatricopeptide repeat-containing protein at5g39710-like protein [Trifolium pratense]	AT5G39710.1_Tetratricopeptide repeat (TPR)-like superfamily protein, GeneName=EMB2745	IPR002885_Pentatricopeptide repeat	1.55333	4.87667	4.51667	4.63667	1.91	1.45	1.3	3.88	5.17	5.58	3.43	4.56	5.56	4.02	4.26	5.63
Am_HQ_774	4930	XP_027359543.1_paired amphipathic helix protein Sin3-like 2 isoform X1 [Abrus precatorius]	AT5G15020.2_SIN3-like 2, GeneName=SNL2	IPR036600_Paired amphipathic helix superfamily; IPR013194_Histone deacetylase interacting domain; IPR031693_Sin3, C-terminal; IPR003822_Paired amphipathic helix	56.1433	48.2567	38.8367	37.39	63.46	45.95	59.02	47.61	50.76	46.4	25.08	45.52	45.91	33.12	40.7	38.35
Am_HQ_777	5110	XP_004498048.1_chromatin-remodeling ATPase INO80-like isoform X2 [Cicer arietinum] XP_012570514.1 chromatin-remodeling ATPase INO80-like isoform X1 [Cicer arietinum]	AT3G57300.1_DNA helicase INO80-like protein, GeneName=INO80	IPR001650_Helicase, C-terminal; IPR014001_Helicase superfamily 1/2, ATP-binding domain; IPR000330_SNF2, N-terminal; IPR027417_P-loop containing nucleoside triphosphate hydrolase; IPR020838_DBINO domain	7.49333	15.5833	10.78	14.68	8.22	9.15	5.11	14.68	17.91	14.16	9.83	11.88	10.63	13.52	14.93	15.59
Am_HQ_778	5109	.	AT2G21230.2_Basic-leucine zipper (bZIP) transcription factor family protein	.	16.1333	17.8133	15.0833	14.5533	24.5	9.67	14.23	19.42	16.14	17.88	16.45	14.03	14.77	11.16	15.24	17.26
Am_HQ_780	5177	AES69823.2_photosystem I P700 chlorophyll A apoprotein A2 [Medicago truncatula]	ATCG00340.1_Photosystem I, PsaA/PsaB protein, GeneName=PSAB	IPR036408_Photosystem I PsaA/PsaB superfamily; IPR001280_Photosystem I PsaA/PsaB	0	0	0	0	0	0	0	0	0	0	0	0	0	0	0	0
Am_HQ_781	5064	GAU44097.1_hypothetical protein TSUD_92420 [Trifolium subterraneum]	AT4G29380.1_protein kinase family protein / WD-40 repeat family protein, GeneName=VPS15	IPR001680_WD40 repeat; IPR011009_Protein kinase-like domain superfamily; IPR000357_HEAT repeat; IPR000719_Protein kinase domain; IPR036322_WD40-repeat-containing domain superfamily; IPR016024_Armadillo-type fold	13.7067	20.7433	15.0733	15.7233	10.4	16.32	14.4	20.32	19.96	21.95	11.96	16.12	17.14	12.94	17.79	16.44
Am_HQ_783	5068	GAU26967.1_hypothetical protein TSUD_06390 [Trifolium subterraneum]	AT2G25970.1_KH domain-containing protein	IPR004088_K Homology domain, type 1; IPR036612_K Homology domain, type 1 superfamily; IPR004087_K Homology domain	9.55667	8.51	8.55667	8.11667	12.46	10.27	5.94	6.64	10.83	8.06	4.31	12.02	9.34	2.39	9.24	12.72
Am_HQ_784	5006	PNY10339.1_hypothetical protein L195_g006913 [Trifolium pratense]	AT3G26350.2_proline-rich receptor-like kinase	.	0.553333	1.65667	1.11667	2.08	0.46	0.82	0.38	1.31	1.96	1.7	1	1.17	1.18	1.57	2.01	2.66
Am_HQ_786	5100	XP_045826463.1_uncharacterized protein LOC123918448 isoform X1 [Trifolium pratense] XP_045826464.1 uncharacterized protein LOC123918448 isoform X2 [Trifolium pratense]	AT4G27190.1_NB-ARC domain-containing disease resistance protein	IPR027417_P-loop containing nucleoside triphosphate hydrolase; IPR002182_NB-ARC	2.15333	2.76	1.74333	5.02333	3.18	0	3.28	5.08	0	3.2	1.93	0	3.3	7.73	0	7.34
Am_HQ_789	5071	PNX93614.1_retrovirus-related Pol polyprotein from transposon TNT 1-94 [Trifolium pratense]	AT4G23160.3_cysteine-rich RECEPTOR-like kinase, GeneName=CRK8	IPR013103_Reverse transcriptase, RNA-dependent DNA polymerase; IPR043502_DNA/RNA polymerase superfamily; IPR025724_GAG-pre-integrase domain; IPR012337_Ribonuclease H-like superfamily; IPR029472_Retrotransposon Copia-like, N-terminal; IPR005162_Retrotransposon gag domain	2.86667	1.73	1.27667	1.61667	0.82	0	7.78	2.04	0.02	3.13	1.09	0	2.74	1.85	0	3
Am_HQ_791	5091	KHN21230.1_Retrovirus-related Pol polyprotein from transposon TNT 1-94, partial [Glycine soja]	AT4G23160.3_cysteine-rich RECEPTOR-like kinase, GeneName=CRK8	IPR001584_Integrase, catalytic core; IPR012337_Ribonuclease H-like superfamily; IPR025724_GAG-pre-integrase domain; IPR043502_DNA/RNA polymerase superfamily; IPR013103_Reverse transcriptase, RNA-dependent DNA polymerase	27.88	33.2167	19.08	21.4033	36.08	23.88	23.68	35.6	34.8	29.25	13.29	23.6	20.35	20.84	22.82	20.55
Am_HQ_793	5091	PNY10806.1_histone deacetylase [Trifolium pratense]	AT4G23160.3_cysteine-rich RECEPTOR-like kinase, GeneName=CRK8	IPR025724_GAG-pre-integrase domain; IPR012337_Ribonuclease H-like superfamily; IPR043502_DNA/RNA polymerase superfamily; IPR001584_Integrase, catalytic core; IPR013103_Reverse transcriptase, RNA-dependent DNA polymerase	6.74667	33.4067	22.7333	17.1033	5.69	11.03	3.52	32.96	50.2	17.06	34.62	24.35	9.23	13.91	23.48	13.92
Am_HQ_794	5076	XP_004517035.1_paired amphipathic helix protein Sin3-like 4 isoform X1 [Cicer arietinum] XP_012567841.1 paired amphipathic helix protein Sin3-like 4 isoform X1 [Cicer arietinum] XP_012567842.1 paired amphipathic helix protein Sin3-like 4 isoform X1 [Cicer arietinum] XP_012567843.1 paired amphipathic helix protein Sin3-like 4 isoform X1 [Cicer arietinum]	AT1G24190.3_SIN3-like 3, GeneName=SNL3	IPR036600_Paired amphipathic helix superfamily; IPR003822_Paired amphipathic helix; IPR031693_Sin3, C-terminal; IPR013194_Histone deacetylase interacting domain	59.3067	36.09	38.0667	36.08	55.8	52.42	69.7	33.91	38.8	35.56	30.17	42.57	41.46	34.81	34.76	38.67
Am_HQ_796	5085	XP_004486089.1_SAC3 family protein B isoform X1 [Cicer arietinum]	AT3G06290.1_SAC3/GANP/Nin1/mts3/eIF-3 p25 family, GeneName=SAC3B	IPR005062_SAC3/GANP/THP3, conserved domain	10.5933	12.5033	11.45	11.6767	14.7	8.86	8.22	12.88	13.49	11.14	10.29	12.55	11.51	10.59	12.18	12.26
Am_HQ_797	5086	XP_027334041.1_cyclin-dependent kinase G-2-like [Abrus precatorius]	AT1G67580.1_Protein kinase superfamily protein	IPR011009_Protein kinase-like domain superfamily; IPR000719_Protein kinase domain	17.15	22.2867	12.8733	17.1967	27.94	11.85	11.66	20.65	25.04	21.17	8.35	16.66	13.61	15.3	19.57	16.72
Am_HQ_799	5085	XP_045830827.1_protein EXORDIUM-like 5 [Trifolium pratense]	AT2G17230.1_EXORDIUM like 5, GeneName=EXL5	IPR006766_Protein EXORDIUM-like	0.506667	1.22	0.476667	0.543333	0.62	0.44	0.46	0.9	1.44	1.32	0.34	0.44	0.65	0.62	0.51	0.5
Am_HQ_801	5079	XP_045814932.1_glutamate--cysteine ligase, chloroplastic-like [Trifolium pratense]	AT4G23100.2_glutamate-cysteine ligase, GeneName=GSH1	.	0.616667	0.19	0.286667	0.286667	0.82	0.32	0.71	0.17	0.29	0.11	0.34	0.29	0.23	0.32	0.27	0.27
Am_HQ_804	5033	RDY09168.1_hypothetical protein CR513_06505, partial [Mucuna pruriens]	AT2G35140.6_DCD (Development and Cell Death) domain protein	IPR013989_Development/cell death domain	9.26	10.35	14.71	11.1833	9.75	8.72	9.31	10.88	12.1	8.07	15.52	15.2	13.41	9.72	11.34	12.49
Am_HQ_805	5078	TKY56776.1_ARF guanine-nucleotide exchange factor GNOM [Spatholobus suberectus]	AT1G13980.2_sec7 domain-containing protein, GeneName=GN	IPR032691_Guanine nucleotide exchange factor, N-terminal; IPR035999_Sec7 domain superfamily; IPR016024_Armadillo-type fold; IPR000904_Sec7 domain	0.69	1.06	1.14	1.7	0.6	0.91	0.56	0.71	1.74	0.73	0.27	2.17	0.98	1.49	1.42	2.19
Am_HQ_807	5079	KAE9605083.1_putative pentatricopeptide [Lupinus albus]	AT2G26790.1_Pentatricopeptide repeat (PPR) superfamily protein	IPR002885_Pentatricopeptide repeat; IPR011990_Tetratricopeptide-like helical domain superfamily	6.62	11.61	6.08333	8.16	6.66	9.4	3.8	14.45	10.47	9.91	4.65	6.49	7.11	7.8	9.09	7.59
Am_HQ_813	5091	MCH79523.1_DNA RNA polymerases superfamily protein [Trifolium medium]	ATMG00860.1_DNA/RNA polymerases superfamily protein, GeneName=ORF158	IPR043502_DNA/RNA polymerase superfamily; IPR000477_Reverse transcriptase domain	0.0966667	12.9067	0.933333	0.58	0.09	0.13	0.07	21.08	10.01	7.63	0.91	1.19	0.7	0.63	0.75	0.36
Am_HQ_814	5071	XP_004516933.1_uncharacterized protein LOC101511880 isoform X1 [Cicer arietinum]	AT1G29370.1_RNA polymerase II degradation factor-like protein (DUF1296)	IPR009719_GBF-interacting protein 1, N-terminal; IPR009060_UBA-like superfamily	2.03	3.61333	3.53667	3.27333	1.53	2.65	1.91	2.9	5.27	2.67	2.45	5.41	2.75	2.29	4.49	3.04
Am_HQ_816	5077	XP_004511757.1_uncharacterized protein LOC101495726 [Cicer arietinum]	AT5G47020.1_MraZ	.	0.323333	0.523333	0.516667	0.86	0.46	0.51	0	0.45	1	0.12	0.26	0.64	0.65	0.81	0.66	1.11
Am_HQ_817	5077	XP_027334517.1_endoribonuclease Dicer homolog 2 [Abrus precatorius]	AT3G03300.3_dicer-like 2, GeneName=DCL2	IPR027417_P-loop containing nucleoside triphosphate hydrolase; IPR014001_Helicase superfamily 1/2, ATP-binding domain; IPR001650_Helicase, C-terminal; IPR006935_Helicase/UvrB, N-terminal	8.94667	6.22667	7.80333	12.9367	5.34	18.59	2.91	3.4	11.69	3.59	4.21	13.89	5.31	8.57	20.35	9.89
Am_HQ_818	5019	XP_027358721.1_DNA (cytosine-5)-methyltransferase 1-like [Abrus precatorius]	AT5G49160.1_methyltransferase 1, GeneName=MET1	IPR001525_C-5 cytosine methyltransferase; IPR017198_DNA (cytosine-5)-methyltransferase 1-like; IPR001025_Bromo adjacent homology (BAH) domain; IPR029063_S-adenosyl-L-methionine-dependent methyltransferase; IPR022702_DNA (cytosine-5)-methyltransferase 1, replication foci domain	18.2933	8.59333	22.0467	8.7	23.07	15.42	16.39	7.08	8.93	9.77	14.25	26.63	25.26	6.23	6.73	13.14
Am_HQ_823	5054	XP_004487052.1_uncharacterized protein LOC101495370 [Cicer arietinum]	AT3G45830.1_nuclear factor kappa-B-binding-like protein	.	20.6733	18.95	14.5667	19.5433	15.25	28.41	18.36	18.53	20.1	18.22	10.55	16.43	16.72	18.42	19.68	20.53
Am_HQ_827	4934	XP_004493856.1_CLIP-associated protein isoform X1 [Cicer arietinum]	AT2G20190.1_CLIP-associated protein, GeneName=CLASP	IPR024395_CLASP N-terminal domain; IPR016024_Armadillo-type fold; IPR000357_HEAT repeat; IPR034085_TOG domain	23.8233	26.3933	30.0767	37.2133	24.34	27.23	19.9	31.27	27.94	19.97	28.86	35.76	25.61	38.57	39.87	33.2
Am_HQ_829	5047	GAU43519.1_hypothetical protein TSUD_245470 [Trifolium subterraneum]	AT5G58730.1_pfkB-like carbohydrate kinase family protein, GeneName=Mik	IPR011611_Carbohydrate kinase PfkB; IPR029056_Ribokinase-like	4.56333	4.07333	3.42333	4.97	6.68	4.18	2.83	4.25	4.1	3.87	3.18	3.42	3.67	4.96	5.36	4.59
Am_HQ_830	4705	XP_004502930.1_phosphatidylinositol 4-kinase beta 1 isoform X1 [Cicer arietinum]	AT5G64070.1_phosphatidylinositol 4-OH kinase beta1, GeneName=PI-4KBETA1	IPR011009_Protein kinase-like domain superfamily; IPR000403_Phosphatidylinositol 3-/4-kinase, catalytic domain; IPR016024_Armadillo-type fold	27.07	21.0367	17.0033	24.17	24.57	37.02	19.62	20.03	23.05	20.03	10.41	21.48	19.12	21.86	23.79	26.86
Am_HQ_831	5045	XP_012572987.1_ABC transporter C family member 3-like isoform X3 [Cicer arietinum] XP_012572988.1 ABC transporter C family member 3-like isoform X3 [Cicer arietinum] XP_012572990.1 ABC transporter C family member 3-like isoform X3 [Cicer arietinum] XP_012572991.1 ABC transporter C family member 3-like isoform X3 [Cicer arietinum] XP_027191555.1 ABC transporter C family member 3-like isoform X3 [C…	AT3G13080.1_multidrug resistance-associated protein 3, GeneName=ABCC3	IPR027417_P-loop containing nucleoside triphosphate hydrolase; IPR011527_ABC transporter type 1, transmembrane domain; IPR003439_ABC transporter-like, ATP-binding domain; IPR036640_ABC transporter type 1, transmembrane domain superfamily; IPR003593_AAA+ ATPase domain	35.92	32.9233	16.3533	32.7833	43.26	43.13	21.37	28.79	38.16	31.82	4.57	20.02	24.47	28.7	29.46	40.19
Am_HQ_836	5043	RDX91133.1_hypothetical protein CR513_26927, partial [Mucuna pruriens]	AT5G11700.1_ephrin type-B receptor	.	16.3933	19.0767	13.0633	18.7933	14.91	19.18	15.09	17.89	22.16	17.18	11.03	14.42	13.74	18.39	18.23	19.76
Am_HQ_837	4878	XP_027362985.1_protein HUA2-LIKE 2-like isoform X1 [Abrus precatorius]	AT3G63070.1_Tudor/PWWP/MBT domain-containing protein	IPR000313_PWWP domain; IPR006569_CID domain	63.2067	24.75	24.9067	28.6367	101.11	38.3	50.21	22.33	26.8	25.12	16.34	29.05	29.33	21.7	29.03	35.18
Am_HQ_838	4986	PNY09881.1_far upstream element-binding protein [Trifolium pratense]	AT2G25970.1_KH domain-containing protein	IPR004088_K Homology domain, type 1; IPR036612_K Homology domain, type 1 superfamily; IPR004087_K Homology domain	4.06667	21.46	15.09	20.7467	5.84	6.36	0	21.71	21.91	20.76	6.32	18.04	20.91	23.09	22.6	16.55
Am_HQ_840	4926	XP_027192649.1_LOW QUALITY PROTEIN: uncharacterized protein LOC101498669 [Cicer arietinum]	AT1G70620.3_cyclin-like protein	IPR031937_PNN-interacting serine/arginine-rich protein	0.83	10.7767	7.68	9.63333	0.24	2.24	0.01	12.69	11.1	8.54	6.25	9.49	7.3	14.11	7.79	7
Am_HQ_841	5037	XP_027363022.1_increased DNA methylation 1-like [Abrus precatorius]	AT4G14920.2_Acyl-CoA N-acyltransferase with RING/FYVE/PHD-type zinc finger protein	IPR019787_Zinc finger, PHD-finger; IPR011011_Zinc finger, FYVE/PHD-type; IPR001965_Zinc finger, PHD-type; IPR032308_Jas TPL-binding domain	2.11333	1.94	1.55333	2.48333	1.68	2.78	1.88	1.89	2.5	1.43	0.45	1.91	2.3	3.47	1.58	2.4
Am_HQ_842	5040	RHN62148.1_putative nucleotidyltransferase, Ribonuclease H [Medicago truncatula]	ATMG00860.1_DNA/RNA polymerases superfamily protein, GeneName=ORF158	IPR043502_DNA/RNA polymerase superfamily; IPR012337_Ribonuclease H-like superfamily; IPR041373_Reverse transcriptase, RNase H-like domain; IPR000477_Reverse transcriptase domain; IPR041588_Integrase zinc-binding domain	2.15667	16.8033	13.6833	6.52	3.22	2.57	0.68	15.75	24.49	10.17	6.7	19.39	14.96	10.88	5.77	2.91
Am_HQ_845	4951	PNX92911.1_Ty3/gypsy retrotransposon protein [Trifolium pratense]	ATMG00860.1_DNA/RNA polymerases superfamily protein, GeneName=ORF158	IPR041588_Integrase zinc-binding domain; IPR041577_Reverse transcriptase/retrotransposon-derived protein, RNase H-like domain; IPR043502_DNA/RNA polymerase superfamily; IPR000477_Reverse transcriptase domain; IPR012337_Ribonuclease H-like superfamily; IPR021109_Aspartic peptidase domain superfamily; IPR016197_Chromo-like domain superfamily; IPR005162_Retrotransposon gag domain	65.7267	2.65667	9.9	6.51667	15.8	53.43	127.95	2.78	3.04	2.15	5.13	11.93	12.64	5.33	8.45	5.77
Am_HQ_846	5059	TKY69096.1_ENHANCER OF AG-4 protein 2 [Spatholobus suberectus]	AT5G23150.2_Tudor/PWWP/MBT domain-containing protein, GeneName=HUA2	IPR006569_CID domain; IPR000313_PWWP domain	5.29333	7.49	6.55333	6.55	6.18	5.53	4.17	5.97	8.36	8.14	6.06	6.47	7.13	6.36	5.52	7.77
Am_HQ_848	4998	XP_004508316.1_chromatin structure-remodeling complex protein SYD isoform X2 [Cicer arietinum]	AT2G28290.5_P-loop containing nucleoside triphosphate hydrolases superfamily protein, GeneName=SYD	IPR000330_SNF2, N-terminal; IPR027417_P-loop containing nucleoside triphosphate hydrolase; IPR001650_Helicase, C-terminal; IPR014001_Helicase superfamily 1/2, ATP-binding domain	27.02	27.9467	19.04	24.3767	35.58	28.14	17.34	27.07	31.3	25.47	10.67	24.25	22.2	16.96	26.02	30.15
Am_HQ_849	5027	KEH20283.1_RNA-binding protein, putative [Medicago truncatula] KEH20289.1 RNA-binding protein, putative [Medicago truncatula]	AT3G54230.2_suppressor of abi3-5, GeneName=SUA	IPR041591_OCRE domain; IPR000504_RNA recognition motif domain; IPR036443_Zinc finger, RanBP2-type superfamily; IPR035979_RNA-binding domain superfamily; IPR001876_Zinc finger, RanBP2-type	9.92333	14.97	13.7033	13.69	13.29	8.47	8.01	15.38	15.23	14.3	11.98	14.37	14.76	14.11	13.32	13.64
Am_HQ_852	4971	TKY52976.1_Ethylene-insensitive protein 2 [Spatholobus suberectus]	AT5G03280.1_NRAMP metal ion transporter family protein, GeneName=EIN2	IPR017187_Ethylene-insensitive protein 2; IPR001046_NRAMP family	11.3333	23.01	42.6033	24.4633	9.24	13.85	10.91	22.66	25.73	20.64	14.48	62.02	51.31	22.63	23.81	26.95
Am_HQ_853	5024	XP_004495510.1_uncharacterized protein LOC101493187 [Cicer arietinum] XP_012569934.1 uncharacterized protein LOC101493187 [Cicer arietinum]	AT1G32810.2_RING/FYVE/PHD zinc finger superfamily protein	IPR011011_Zinc finger, FYVE/PHD-type; IPR001965_Zinc finger, PHD-type	1	4.15	2.48	2.90667	1.31	1.13	0.56	4.52	4.01	3.92	1.17	3.22	3.05	2.34	3.33	3.05
Am_HQ_861	4984	XP_020239124.1_CLIP-associated protein [Cajanus cajan]	AT2G20190.1_CLIP-associated protein, GeneName=CLASP	IPR000357_HEAT repeat; IPR024395_CLASP N-terminal domain; IPR016024_Armadillo-type fold; IPR034085_TOG domain	5.54	12.9567	10.7867	15.2733	3.3	10.14	3.18	10.46	16.74	11.67	5.94	14.17	12.25	10.9	14.21	20.71
Am_HQ_863	5013	RZB71032.1_LINE-1 retrotransposable element ORF2 protein [Glycine soja]	AT4G29090.1_Ribonuclease H-like superfamily protein	.	3.2	7.51667	4.22	5.58	3.48	2.35	3.77	5.88	9.36	7.31	2.09	4.8	5.77	5.29	6.28	5.17
Am_HQ_864	4980	XP_045829861.1_ABC transporter C family member 3-like [Trifolium pratense]	AT3G13080.1_multidrug resistance-associated protein 3, GeneName=ABCC3	IPR011527_ABC transporter type 1, transmembrane domain; IPR003439_ABC transporter-like, ATP-binding domain; IPR003593_AAA+ ATPase domain; IPR036640_ABC transporter type 1, transmembrane domain superfamily; IPR027417_P-loop containing nucleoside triphosphate hydrolase	22.85	41.6167	35.4733	10.0967	5.07	61.64	1.84	31.2	40.13	53.52	62.91	22.29	21.22	13.33	7.17	9.79
Am_HQ_865	5030	XP_003592774.2_uncharacterized protein LOC11421925 [Medicago truncatula] XP_024628767.2 uncharacterized protein LOC11421925 [Medicago truncatula] RHN82749.1 hypothetical protein MtrunA17_Chr1g0213121 [Medicago truncatula]	AT5G13590.5_hypothetical protein	.	45.01	27.6	24.1167	35.12	34.39	39.52	61.12	25.06	31.65	26.09	23.24	25.66	23.45	34.72	44.57	26.07
Am_HQ_866	4939	XP_027187789.1_abscisic-aldehyde oxidase-like isoform X1 [Cicer arietinum]	AT2G27150.1_abscisic aldehyde oxidase 3, GeneName=AAO3	IPR008274_Aldehyde oxidase/xanthine dehydrogenase, molybdopterin binding; IPR005107_CO dehydrogenase flavoprotein, C-terminal; IPR016208_Aldehyde oxidase/xanthine dehydrogenase; IPR036884_[2Fe-2S]-binding domain superfamily; IPR000674_Aldehyde oxidase/xanthine dehydrogenase, a/b hammerhead; IPR036010_2Fe-2S ferredoxin-like superfamily; IPR002888_[2Fe-2S]-binding; IPR036856_Aldehyde oxidase/xanthi…	4.5	19.2767	15.35	7.17	3.92	6	3.58	7.48	12.24	38.11	8.14	21.21	16.7	6.66	6.85	8
Am_HQ_867	5014	XP_004499551.1_uncharacterized protein LOC101494281 [Cicer arietinum]	AT1G17450.3_B-block binding subunit of TFIIIC	IPR007309_B-block binding subunit of TFIIIC; IPR036390_Winged helix DNA-binding domain superfamily	5.95667	6.13333	4.34667	8.22	8.92	4.52	4.43	6.11	7.12	5.17	2.06	5.84	5.14	5.67	7.4	11.59
Am_HQ_869	5009	XP_045807023.1_ABC transporter C family member 13-like [Trifolium pratense]	AT2G07680.3_multidrug resistance-associated protein 11, GeneName=ABCC13	IPR027417_P-loop containing nucleoside triphosphate hydrolase; IPR003593_AAA+ ATPase domain; IPR011527_ABC transporter type 1, transmembrane domain; IPR003439_ABC transporter-like, ATP-binding domain; IPR036640_ABC transporter type 1, transmembrane domain superfamily	10.81	10.0733	7.97333	13.9233	16.62	10.08	5.73	10.98	11.94	7.3	7.63	8.75	7.54	14.33	14.45	12.99
Am_HQ_873	4999	XP_027190198.1_protein FAR-RED ELONGATED HYPOCOTYL 3 isoform X9 [Cicer arietinum]	AT3G22170.2_far-red elongated hypocotyls 3, GeneName=FHY3	IPR007527_Zinc finger, SWIM-type; IPR018289_MULE transposase domain; IPR004330_FAR1 DNA binding domain; IPR006564_Zinc finger, PMZ-type	1.68	2.4	2.6	2.43333	0.35	3.68	1.01	0.11	5.01	2.08	0.03	4.92	2.85	0.5	4.49	2.31
Am_HQ_875	4986	XP_045821460.1_nuclear pore complex protein NUP155 [Trifolium pratense]	AT1G14850.1_nucleoporin 155, GeneName=NUP155	IPR007187_Nucleoporin, Nup133/Nup155-like, C-terminal; IPR014908_Nucleoporin, Nup133/Nup155-like, N-terminal	9.31333	9.91333	9.00667	13.1567	14.03	8.54	5.37	9.47	11.3	8.97	5.88	10.76	10.38	11.95	11.83	15.69
Am_HQ_876	5005	TKY57102.1_hypothetical protein E2542_SST21548 [Spatholobus suberectus]	AT2G26920.1_Ubiquitin-associated/translation elongation factor EF1B protein	IPR015940_Ubiquitin-associated domain; IPR009060_UBA-like superfamily	0.793333	1.57	0.586667	0.726667	0.85	0.85	0.68	1.78	2.12	0.81	0.38	0.96	0.42	1.05	0.65	0.48
Am_HQ_877	4878	XP_012570138.1_increased DNA methylation 1 [Cicer arietinum]	AT4G14920.2_Acyl-CoA N-acyltransferase with RING/FYVE/PHD-type zinc finger protein	IPR019787_Zinc finger, PHD-finger; IPR032308_Jas TPL-binding domain; IPR011011_Zinc finger, FYVE/PHD-type; IPR001965_Zinc finger, PHD-type	59.4033	43.24	34.0167	45.88	75.04	59.63	43.54	39.08	49.01	41.63	22.26	40.25	39.54	38.83	47.3	51.51
Am_HQ_878	4988	AAO23078.1_polyprotein [Glycine max] KAH1152324.1 hypothetical protein GYH30_045693 [Glycine max]	.	IPR021109_Aspartic peptidase domain superfamily; IPR000477_Reverse transcriptase domain; IPR043502_DNA/RNA polymerase superfamily	3.16667	3.29	5.16	4.37	2.99	2.99	3.52	3	2.91	3.96	4.66	5.21	5.61	3.36	3.88	5.87
Am_HQ_880	5005	XP_026281490.1_zinc finger protein 335 isoform X1 [Frankliniella occidentalis] XP_026281491.1 zinc finger protein 335 isoform X1 [Frankliniella occidentalis] XP_026281492.1 zinc finger protein 335 isoform X1 [Frankliniella occidentalis]	.	IPR036236_Zinc finger C2H2 superfamily; IPR013087_Zinc finger C2H2-type	0	0.04	1.56333	0	0	0	0	0	0.12	0	3.7	0.57	0.42	0	0	0
Am_HQ_888	4941	KYP34307.1_Retrovirus-related Pol polyprotein from transposon TNT 1-94 [Cajanus cajan]	ATMG00820.1_Reverse transcriptase (RNA-dependent DNA polymerase), GeneName=ORF170	IPR013103_Reverse transcriptase, RNA-dependent DNA polymerase	2.99	3.57	2.84	3.58	1.82	2.81	4.34	2.19	6.4	2.12	0.91	4.81	2.8	2.19	5.6	2.95
Am_HQ_891	4993	XP_004496090.1_putative E3 ubiquitin-protein ligase LIN [Cicer arietinum] XP_012570071.1 putative E3 ubiquitin-protein ligase LIN [Cicer arietinum]	AT1G49780.1_plant U-box 26, GeneName=PUB26	IPR003613_U-box domain; IPR016024_Armadillo-type fold; IPR001680_WD40 repeat; IPR036322_WD40-repeat-containing domain superfamily	4.27	18.0933	4.79333	7.16333	0.57	9.74	2.5	16.79	18	19.49	2.9	5.25	6.23	6.5	6.4	8.59
Am_HQ_892	4997	TKY67201.1_Helicase protein MOM1 [Spatholobus suberectus]	.	.	3.80667	3.11333	4.80667	5.08667	5.07	2.9	3.45	2.51	3.23	3.6	6.6	5.23	2.59	5.61	4.99	4.66
Am_HQ_894	4990	XP_004515844.1_lysine-specific demethylase REF6-like [Cicer arietinum]	AT3G48430.1_relative of early flowering 6, GeneName=REF6	IPR003349_JmjN domain; IPR003347_JmjC domain; IPR013087_Zinc finger C2H2-type; IPR036236_Zinc finger C2H2 superfamily	12.23	5.59	4.73667	8.75333	15.37	13.25	8.07	4.83	6.65	5.29	3.95	4.75	5.51	8.83	7.74	9.69
Am_HQ_895	4988	PNX75793.1_retrovirus-related Pol polyprotein from transposon TNT 1-94 [Trifolium pratense]	AT4G23160.3_cysteine-rich RECEPTOR-like kinase, GeneName=CRK8	IPR043502_DNA/RNA polymerase superfamily; IPR013103_Reverse transcriptase, RNA-dependent DNA polymerase	0.103333	2.96	0.786667	0.37	0.11	0.2	0	5.07	3.81	0	1.12	1.24	0	0.67	0.44	0
Am_HQ_896	4985	XP_013468152.1_nuclear pore complex protein NUP160 isoform X1 [Medicago truncatula] KEH42189.1 suppressor of auxin resistance 1 protein [Medicago truncatula] RHN79740.1 hypothetical protein MtrunA17_Chr1g0180611 [Medicago truncatula]	AT1G33410.1_SUPPRESSOR OF AUXIN RESISTANCE1, GeneName=SAR1	IPR035192_Nuclear pore complex protein NUP160; IPR011047_Quinoprotein alcohol dehydrogenase-like superfamily	3.49	14.0733	9.65667	16.02	3.81	4.66	2	12.78	16.01	13.43	6.89	10.86	11.22	10.74	15.04	22.28
Am_HQ_898	4953	QYF11652.1_ABCC11, partial [Glycyrrhiza glabra]	AT3G59140.1_multidrug resistance-associated protein 14, GeneName=ABCC10	IPR003593_AAA+ ATPase domain; IPR011527_ABC transporter type 1, transmembrane domain; IPR036640_ABC transporter type 1, transmembrane domain superfamily; IPR003439_ABC transporter-like, ATP-binding domain; IPR027417_P-loop containing nucleoside triphosphate hydrolase	20.89	42.6867	32.0367	53.4033	12.8	34.11	15.76	33.77	48.01	46.28	30.12	33.07	32.92	50.68	50.62	58.91
Am_HQ_901	4966	QYF11643.1_ABCC2, partial [Glycyrrhiza glabra]	AT3G21250.4_multidrug resistance-associated protein 6, GeneName=ABCC8	IPR003439_ABC transporter-like, ATP-binding domain; IPR036640_ABC transporter type 1, transmembrane domain superfamily; IPR027417_P-loop containing nucleoside triphosphate hydrolase; IPR011527_ABC transporter type 1, transmembrane domain; IPR003593_AAA+ ATPase domain	20.69	16.5	31.8767	4.58333	10.85	19.16	32.06	7.39	18.85	23.26	16.26	41.77	37.6	3.56	3.63	6.56
Am_HQ_906	5042	XP_020225808.1_TMV resistance protein N [Cajanus cajan]	AT5G36930.3_Disease resistance protein (TIR-NBS-LRR class) family	IPR027417_P-loop containing nucleoside triphosphate hydrolase; IPR000157_Toll/interleukin-1 receptor homology (TIR) domain; IPR035897_Toll/interleukin-1 receptor homology (TIR) domain superfamily; IPR002182_NB-ARC; IPR036390_Winged helix DNA-binding domain superfamily	6.18333	3.06333	1.72667	2.65667	4.7	4.84	9.01	2.75	3.08	3.36	1.26	1.86	2.06	3.09	2.11	2.77
Am_HQ_908	4927	.	.	.	1.99	2.71667	2.28	4.45	2.3	2.23	1.44	2.34	1.91	3.9	1	2.4	3.44	4.04	3.7	5.61
Am_HQ_920	4972	TKY73057.1_Serine/threonine-protein kinase CTR1 [Spatholobus suberectus]	AT3G46920.1_kinase superfamily with octicosapeptide/Phox/Bem1p domain-containing protein	IPR001245_Serine-threonine/tyrosine-protein kinase, catalytic domain; IPR000719_Protein kinase domain; IPR011009_Protein kinase-like domain superfamily	11.18	12.23	10.01	17.78	8.15	19.49	5.9	11.91	12.58	12.2	8.3	11.07	10.66	16.25	18.72	18.37
Am_HQ_924	4953	XP_045826971.1_uncharacterized protein LOC123918852 isoform X4 [Trifolium pratense]	AT5G56930.1_CCCH-type zinc finger family protein, GeneName=EMB1789	IPR036855_Zinc finger, CCCH-type superfamily; IPR000571_Zinc finger, CCCH-type	8.07333	9.89667	7.86	11.02	11.29	8.95	3.98	11.98	8.04	9.67	3.21	10.7	9.67	9.47	9.79	13.8
Am_HQ_925	4895	XP_007150330.1_hypothetical protein PHAVU_005G144600g [Phaseolus vulgaris] ESW22324.1 hypothetical protein PHAVU_005G144600g [Phaseolus vulgaris]	AT2G29050.2_RHOMBOID-like 1, GeneName=RBL1	.	1.18	9.46	6.75	7.15	1.35	1.83	0.36	9.91	10.47	8	6.09	7.39	6.77	7.08	7.23	7.14
Am_HQ_927	4952	RDX59714.1_BTB/POZ domain-containing protein NPY2 [Mucuna pruriens]	AT2G14820.1_Phototropic-responsive NPH3 family protein, GeneName=NPY2	IPR002048_EF-hand domain; IPR011992_EF-hand domain pair; IPR003674_Oligosaccharyl transferase, STT3 subunit	9.52667	13.37	7.22	11.84	0.25	28.33	0	0.33	39.68	0.1	0.17	21.49	0	0.16	35.36	0
Am_HQ_928	4952	PNY17030.1_D-xylose-proton symporter-like protein chloroplastic-like, partial [Trifolium pratense]	AT5G59250.1_Major facilitator superfamily protein	IPR036259_MFS transporter superfamily; IPR005828_Major facilitator, sugar transporter-like	4.4	4.91333	3.1	2.46667	3.62	4.49	5.09	5.09	5.07	4.58	1.96	3.52	3.82	2.62	1.75	3.03
Am_HQ_932	4930	QYF11643.1_ABCC2, partial [Glycyrrhiza glabra]	AT3G21250.4_multidrug resistance-associated protein 6, GeneName=ABCC8	IPR036640_ABC transporter type 1, transmembrane domain superfamily; IPR027417_P-loop containing nucleoside triphosphate hydrolase; IPR003439_ABC transporter-like, ATP-binding domain; IPR003593_AAA+ ATPase domain; IPR011527_ABC transporter type 1, transmembrane domain	36.2233	28.4967	41.21	6.69	29.95	29.07	49.65	15.54	26.11	43.84	11.26	56.63	55.74	4.72	5.16	10.19
Am_HQ_933	4943	KYP38573.1_Retrovirus-related Pol polyprotein from transposon TNT 1-94, partial [Cajanus cajan]	AT4G23160.3_cysteine-rich RECEPTOR-like kinase, GeneName=CRK8	IPR025724_GAG-pre-integrase domain; IPR001584_Integrase, catalytic core; IPR036875_Zinc finger, CCHC-type superfamily; IPR043502_DNA/RNA polymerase superfamily; IPR012337_Ribonuclease H-like superfamily; IPR013103_Reverse transcriptase, RNA-dependent DNA polymerase	3.05667	1.42333	0.626667	0.993333	1.08	1.65	6.44	0.8	2.02	1.45	0.37	0.77	0.74	0.61	1.75	0.62
Am_HQ_935	4946	XP_004487850.1_ABC transporter C family member 14-like [Cicer arietinum]	AT3G62700.1_multidrug resistance-associated protein 10, GeneName=ABCC14	IPR036640_ABC transporter type 1, transmembrane domain superfamily; IPR003439_ABC transporter-like, ATP-binding domain; IPR027417_P-loop containing nucleoside triphosphate hydrolase; IPR011527_ABC transporter type 1, transmembrane domain; IPR003593_AAA+ ATPase domain	66.63	106.157	85.61	74.6333	36.43	82.56	80.9	102.21	101.43	114.83	42.53	96.59	117.71	63.29	73.63	86.98
Am_HQ_937	4934	PNX64406.1_hypothetical protein L195_g054002 [Trifolium pratense]	.	.	0.863333	2.29333	2.26667	2.23667	1.44	0.98	0.17	2.37	2.19	2.32	1.25	2.7	2.85	2.03	2.42	2.26
Am_HQ_938	4914	XP_004499912.1_DNA topoisomerase 2 [Cicer arietinum] XP_004517303.1 DNA topoisomerase 2 [Cicer arietinum]	AT3G23890.2_topoisomerase II, GeneName=TOPII	IPR020568_Ribosomal protein S5 domain 2-type fold; IPR006171_TOPRIM domain; IPR031660_C-terminal associated domain of TOPRIM; IPR001154_DNA topoisomerase II, eukaryotic-type; IPR002205_DNA topoisomerase, type IIA, domain A; IPR013760_DNA topoisomerase, type IIA-like domain superfamily; IPR013506_DNA topoisomerase, type IIA, subunit B, domain 2; IPR001241_DNA topoisomerase, type IIA	0.33	1.62	6.87667	3.62333	0.41	0.22	0.36	0.85	3.06	0.95	5.11	6.89	8.63	1.52	2.06	7.29
Am_HQ_940	4935	XP_027192671.1_myosin-2-like [Cicer arietinum]	AT5G54280.2_myosin 2, GeneName=ATM2	IPR001609_Myosin head, motor domain; IPR027417_P-loop containing nucleoside triphosphate hydrolase	0.183333	5.37	2.11	1.42	0.15	0.4	0	6.65	7.77	1.69	1.87	3.65	0.81	1.57	2.42	0.27
Am_HQ_941	4829	RHN69276.1_putative RNA-directed DNA polymerase [Medicago truncatula]	AT4G23160.3_cysteine-rich RECEPTOR-like kinase, GeneName=CRK8	IPR013103_Reverse transcriptase, RNA-dependent DNA polymerase; IPR043502_DNA/RNA polymerase superfamily	1.63333	1.55	1.40333	2.41667	1.54	1.98	1.38	1.53	1.26	1.86	1.03	1.32	1.86	2.73	2.51	2.01
Am_HQ_946	4929	RDX69081.1_ABC transporter G family member 32, partial [Mucuna pruriens]	AT2G26910.1_pleiotropic drug resistance 4, GeneName=ABCG32	IPR043926_ABC transporter family G domain; IPR003439_ABC transporter-like, ATP-binding domain; IPR003593_AAA+ ATPase domain; IPR029481_ABC-transporter, N-terminal domain; IPR027417_P-loop containing nucleoside triphosphate hydrolase	0	11.92	19.48	1.92	0	0	0	6.97	19.22	9.57	9.61	25.58	23.25	2.6	1.13	2.03
Am_HQ_947	4926	XP_004511916.1_DNA polymerase alpha catalytic subunit [Cicer arietinum]	AT5G67100.2_DNA-directed DNA polymerase, GeneName=ICU2	IPR012337_Ribonuclease H-like superfamily; IPR024647_DNA polymerase alpha catalytic subunit, N-terminal domain; IPR006133_DNA-directed DNA polymerase, family B, exonuclease domain	0.116667	0.736667	3.54	2.54	0.13	0.04	0.18	0.28	1.31	0.62	3.4	3.25	3.97	0.82	1.28	5.52
Am_HQ_950	4908	XP_004505806.1_ENHANCER OF AG-4 protein 2, partial [Cicer arietinum]	AT5G23150.1_Tudor/PWWP/MBT domain-containing protein, GeneName=HUA2	IPR000313_PWWP domain; IPR006569_CID domain	33.5833	21.6133	16.01	19.38	39.69	24.29	36.77	21.55	22.24	21.05	10.7	19.08	18.25	17.12	19.98	21.04
Am_HQ_953	4821	PNY14330.1_chaperone protein ClpB, partial [Trifolium pratense]	AT2G40130.2_Double Clp-N motif-containing P-loop nucleoside triphosphate hydrolases superfamily protein	IPR003959_ATPase, AAA-type, core; IPR027417_P-loop containing nucleoside triphosphate hydrolase	0.56	2.17667	0.693333	3.78667	0.37	0.27	1.04	1.24	2.95	2.34	1.18	0.29	0.61	4.29	3.94	3.13
Am_HQ_957	4891	KAH1188340.1_hypothetical protein GmHk_U059647 [Glycine max] UBY46623.1 hypothetical protein [Glycine max]	AT2G07675.1_Ribosomal protein S12/S23 family protein	.	4.07333	2.12333	6.41	8.78	4.53	4.75	2.94	2.72	1.63	2.02	13.97	2.98	2.28	20.59	2.96	2.79
Am_HQ_959	4841	PNX92911.1_Ty3/gypsy retrotransposon protein [Trifolium pratense]	ATMG00860.1_DNA/RNA polymerases superfamily protein, GeneName=ORF158	IPR041577_Reverse transcriptase/retrotransposon-derived protein, RNase H-like domain; IPR012337_Ribonuclease H-like superfamily; IPR023780_Chromo domain; IPR043502_DNA/RNA polymerase superfamily; IPR041588_Integrase zinc-binding domain; IPR000477_Reverse transcriptase domain; IPR016197_Chromo-like domain superfamily	5.12667	36.1533	8.45667	2.95333	5.19	0.76	9.43	51.03	35.32	22.11	3.42	13.79	8.16	2.3	2.43	4.13
Am_HQ_961	4910	XP_012568718.1_histidine kinase 2 isoform X2 [Cicer arietinum]	AT5G35750.1_histidine kinase 2, GeneName=HK2	IPR003661_Signal transduction histidine kinase, dimerisation/phosphoacceptor domain; IPR006189_CHASE domain; IPR001789_Signal transduction response regulator, receiver domain; IPR003594_Histidine kinase/HSP90-like ATPase; IPR004358_Signal transduction histidine kinase-related protein, C-terminal; IPR011006_CheY-like superfamily; IPR036097_Signal transduction histidine kinase, dimerisation/phospho…	4.37333	15.82	13.0133	15.2467	4.01	5.64	3.47	18.29	13.51	15.66	8.49	13.85	16.7	17.22	12.59	15.93
Am_HQ_963	4861	PNX99280.1_hypothetical protein L195_g022545, partial [Trifolium pratense]	AT5G64550.1_loricrin-like protein	.	2.23667	1.74	1.04333	1.4	2.36	2.45	1.9	1.88	1.84	1.5	0.57	1.27	1.29	2.47	0.83	0.9
Am_HQ_966	4825	TKY67201.1_Helicase protein MOM1 [Spatholobus suberectus]	.	.	4.00333	4.92667	3.87333	4.12333	5.93	2.96	3.12	3.78	6.74	4.26	1.79	4.48	5.35	2.35	4.4	5.62
Am_HQ_971	4907	KEH34050.1_disease resistance protein (TIR-NBS-LRR class), putative [Medicago truncatula]	AT5G36930.3_Disease resistance protein (TIR-NBS-LRR class) family	IPR011713_Leucine-rich repeat 3	13.0867	7.12	0.633333	4.56333	1.75	8.49	29.02	12.55	4.17	4.64	0.69	0	1.21	8.68	1.79	3.22
Am_HQ_972	4893	ACU16709.1_unknown [Glycine max]	AT3G51100.2_altered inheritance of mitochondria protein	.	0.663333	0.813333	0.736667	2.46	0.72	0.74	0.53	0.51	1.31	0.62	0.53	0.96	0.72	2.43	2.91	2.04
Am_HQ_973	4877	XP_007156614.1_hypothetical protein PHAVU_002G003300g [Phaseolus vulgaris] ESW28608.1 hypothetical protein PHAVU_002G003300g [Phaseolus vulgaris]	AT5G47010.1_RNA helicase, GeneName=LBA1	.	0	0	0	0	0	0	0	0	0	0	0	0	0	0	0	0
Am_HQ_975	4872	GAU20316.1_hypothetical protein TSUD_337970 [Trifolium subterraneum]	AT4G23160.3_cysteine-rich RECEPTOR-like kinase, GeneName=CRK8	IPR001584_Integrase, catalytic core; IPR012337_Ribonuclease H-like superfamily	17.0833	7.69667	12.5933	14.1533	20.66	15.95	14.64	5.46	8.08	9.55	13.06	14.57	10.15	12.99	13.95	15.52
Am_HQ_976	4903	XP_045823480.1_putative pentatricopeptide repeat-containing protein At1g12700, mitochondrial [Trifolium pratense] XP_045823481.1 putative pentatricopeptide repeat-containing protein At1g12700, mitochondrial [Trifolium pratense]	AT1G64630.1_with no lysine (K) kinase 10, GeneName=WNK10	IPR002885_Pentatricopeptide repeat	0.05	0.106667	0.213333	0.0566667	0.15	0	0	0.07	0.1	0.15	0	0.4	0.24	0.17	0	0
Am_HQ_977	4899	XP_004487142.1_carbamoyl-phosphate synthase large chain, chloroplastic [Cicer arietinum]	AT1G29900.1_carbamoyl phosphate synthetase B, GeneName=CARB	IPR011607_Methylglyoxal synthase-like domain; IPR005480_Carbamoyl-phosphate synthetase, large subunit oligomerisation domain; IPR006275_Carbamoyl-phosphate synthase, large subunit; IPR016185_Pre-ATP-grasp domain superfamily; IPR005483_Carbamoyl-phosphate synthase large subunit, CPSase domain; IPR005479_Carbamoyl-phosphate synthetase large subunit-like, ATP-binding domain; IPR036914_Methylglyoxal …	0.846667	3.78	4.78667	11.0167	1.6	0.66	0.28	4.34	3.33	3.67	2.38	4.84	7.14	5.47	15.76	11.82
Am_HQ_979	4889	XP_004492028.1_RNA polymerase II C-terminal domain phosphatase-like 3 [Cicer arietinum]	AT2G33540.1_C-terminal domain phosphatase-like 3, GeneName=CPL3	IPR036412_HAD-like superfamily; IPR011947_FCP1-like phosphatase, phosphatase domain; IPR004274_FCP1 homology domain; IPR001357_BRCT domain; IPR036420_BRCT domain superfamily	7.74667	17.76	10.92	13.6967	7.31	7.55	8.38	19.56	17.03	16.69	7.75	12.11	12.9	14.77	13.92	12.4
Am_HQ_982	4895	XP_012569315.1_uncharacterized protein LOC101494252 isoform X1 [Cicer arietinum]	AT2G41520.3_Heat shock protein DnaJ with tetratricopeptide repeat-containing protein, GeneName=TPR15	IPR036869_Chaperone J-domain superfamily; IPR001623_DnaJ domain; IPR011990_Tetratricopeptide-like helical domain superfamily; IPR019734_Tetratricopeptide repeat	8.61667	11.49	9.00667	10.8233	9.16	7.25	9.44	11.05	12.51	10.91	6.52	10.2	10.3	8.73	12.32	11.42
Am_HQ_990	4886	KAH1214576.1_Pre-mRNA splicing factor SR-like 1 [Glycine max]	AT5G37370.1_PRP38 family protein, GeneName=ATSRL1	IPR024767_Pre-mRNA-splicing factor 38, C-terminal	2.40333	4.65	3.82	3.23	2.35	3.23	1.63	5.15	4.79	4.01	2.21	4.45	4.8	2.69	3.09	3.91
Am_HQ_996	4868	XP_004489042.1_increased DNA methylation 1 [Cicer arietinum] XP_004489043.1 increased DNA methylation 1 [Cicer arietinum]	AT3G14980.3_Acyl-CoA N-acyltransferase with RING/FYVE/PHD-type zinc finger protein, GeneName=ROS4	IPR016181_Acyl-CoA N-acyltransferase; IPR001965_Zinc finger, PHD-type; IPR019787_Zinc finger, PHD-finger; IPR011011_Zinc finger, FYVE/PHD-type; IPR032308_Jas TPL-binding domain	3.15667	4.69333	6.31333	7.83667	2.53	3.34	3.6	4.59	5.13	4.36	4.22	7.41	7.31	5.9	7.73	9.88
Am_HQ_999	4880	XP_027356637.1_CHD3-type chromatin-remodeling factor PICKLE isoform X2 [Abrus precatorius]	AT2G25170.3_chromatin remodeling factor CHD3 (PICKLE), GeneName=PKL	IPR009463_Domain of unknown function DUF1087; IPR001650_Helicase, C-terminal; IPR009462_CHD subfamily II, SANT-like domain; IPR027417_P-loop containing nucleoside triphosphate hydrolase; IPR000330_SNF2, N-terminal; IPR012957_CHD, C-terminal 2; IPR014001_Helicase superfamily 1/2, ATP-binding domain	18.5033	37.33	37.64	30.2367	15.74	21.6	18.17	33.65	41.32	37.02	31.68	39.31	41.93	24.07	29.89	36.75
Am_HQ_1000	4906	XP_003592774.2_uncharacterized protein LOC11421925 [Medicago truncatula] XP_024628767.2 uncharacterized protein LOC11421925 [Medicago truncatula] RHN82749.1 hypothetical protein MtrunA17_Chr1g0213121 [Medicago truncatula]	AT5G13590.5_hypothetical protein	.	33.4533	22.17	13.7367	24.21	26.08	36.94	37.34	31.61	19.49	15.41	4.28	19.3	17.63	26.19	22.15	24.29
Am_HQ_1002	4877	XP_013463581.1_auxin response factor 19 isoform X1 [Medicago truncatula] XP_039686437.1 auxin response factor 19 isoform X1 [Medicago truncatula] KEH37616.1 auxin response factor 2 [Medicago truncatula] RHN73692.1 putative transcription factor ARF family [Medicago truncatula]	AT1G19220.1_auxin response factor 19, GeneName=ARF19	IPR003340_B3 DNA binding domain; IPR010525_Auxin response factor domain; IPR015300_DNA-binding pseudobarrel domain superfamily; IPR033389_AUX/IAA domain	22.66	11.4333	12.52	28.2833	32.46	13.34	22.18	10.8	12.69	10.81	7.87	14.92	14.77	15.9	50.42	18.53
Am_HQ_1004	4876	AAA81472.1_metalloendopeptidase [Pisum sativum]	AT5G42390.1_Insulinase (Peptidase family M16) family protein, GeneName=SPP	IPR007863_Peptidase M16, C-terminal; IPR011765_Peptidase M16, N-terminal; IPR011249_Metalloenzyme, LuxS/M16 peptidase-like	3.58	12.3267	6.79667	7.09667	3.45	4.7	2.59	15.31	8.62	13.05	6.88	4.46	9.05	10.22	4.47	6.6
Am_HQ_1006	4735	XP_004494255.1_trafficking protein particle complex subunit 8 isoform X2 [Cicer arietinum]	AT5G16280.2_Tetratricopeptide repeat (TPR)-like superfamily protein	IPR024420_TRAPP III complex, Trs85; IPR011990_Tetratricopeptide-like helical domain superfamily	12.4967	13.6067	13.2433	15.5167	12.67	14.54	10.28	11.97	15.98	12.87	10.1	14.95	14.68	13.17	15.35	18.03
Am_HQ_1012	4870	ACU21557.1_phytochrome B, partial [Medicago sativa]	AT2G18790.1_phytochrome B, GeneName=PHYB	IPR013767_PAS fold; IPR003018_GAF domain; IPR000014_PAS domain; IPR035965_PAS domain superfamily; IPR013654_PAS fold-2; IPR013515_Phytochrome, central region; IPR001294_Phytochrome	4.64	9.77	6.13667	11.3733	4.81	5.72	3.39	10.38	8.32	10.61	4.49	6.46	7.46	11.54	10.22	12.36
Am_HQ_1013	4866	.	.	.	1.46333	1.91	0.836667	1.02	2.42	0.78	1.19	1.66	2.12	1.95	1.1	0.59	0.82	1.14	1	0.92
Am_HQ_1015	4767	XP_045833289.1_putative phospholipid-transporting ATPase 9 isoform X2 [Trifolium pratense] XP_045833290.1 putative phospholipid-transporting ATPase 9 isoform X2 [Trifolium pratense] XP_045833291.1 putative phospholipid-transporting ATPase 9 isoform X2 [Trifolium pratense]	AT1G68710.1_ATPase E1-E2 type family protein / haloacid dehalogenase-like hydrolase family protein	IPR008250_P-type ATPase, A domain superfamily; IPR032630_P-type ATPase, C-terminal; IPR036412_HAD-like superfamily; IPR001757_P-type ATPase; IPR023299_P-type ATPase, cytoplasmic domain N; IPR006539_P-type ATPase, subfamily IV; IPR023298_P-type ATPase	8.69333	9.86	4.77	11.3267	1.22	11.23	13.63	5.41	13.28	10.89	3.48	5.08	5.75	10.7	10.04	13.24
Am_HQ_1016	4817	XP_004514933.1_clustered mitochondria protein [Cicer arietinum]	AT3G52140.2_tetratricopeptide repeat (TPR)-containing protein, GeneName=NOXY38	IPR027523_CLU domain containing protein; IPR007967_GSKIP domain; IPR023231_GSKIP domain superfamily; IPR028275_Clustered mitochondria protein, N-terminal; IPR011990_Tetratricopeptide-like helical domain superfamily; IPR019734_Tetratricopeptide repeat; IPR025697_CLU domain; IPR033646_CLU central domain	47.2	42.86	41.76	43.0433	59.08	54.93	27.59	38.6	51.62	38.36	26.97	48.76	49.55	34.3	44.38	50.45
Am_HQ_1017	4848	XP_020229301.1_TMV resistance protein N [Cajanus cajan]	AT5G36930.3_Disease resistance protein (TIR-NBS-LRR class) family	IPR002182_NB-ARC; IPR036390_Winged helix DNA-binding domain superfamily; IPR027417_P-loop containing nucleoside triphosphate hydrolase; IPR035897_Toll/interleukin-1 receptor homology (TIR) domain superfamily; IPR000157_Toll/interleukin-1 receptor homology (TIR) domain	3.57667	23.3567	7.91333	17.8733	3.81	4.04	2.88	23.45	23.79	22.83	6.11	7.68	9.95	26.15	12.68	14.79
Am_HQ_1019	4865	XP_027349425.1_regulatory-associated protein of TOR 1 isoform X2 [Abrus precatorius]	AT3G08850.1_Regulatory-associated protein of TOR 1, GeneName=RAPTOR1	IPR001680_WD40 repeat; IPR029347_Raptor, N-terminal CASPase-like domain; IPR016024_Armadillo-type fold; IPR036322_WD40-repeat-containing domain superfamily	24.2267	25.9933	22.6567	25.17	28.91	19.63	24.14	23.38	27.77	26.83	18.84	24.59	24.54	21.92	25.3	28.29
Am_HQ_1022	4864	XP_027191714.1_zinc finger CCCH domain-containing protein 55 isoform X2 [Cicer arietinum]	AT3G18640.1_Zinc finger C-x8-C-x5-C-x3-H type family protein	IPR000571_Zinc finger, CCCH-type; IPR036855_Zinc finger, CCCH-type superfamily	1.89667	4.72333	2.24667	4.50333	1.86	1.76	2.07	2.86	5.59	5.72	2.06	2.07	2.61	3.55	4.08	5.88
Am_HQ_1030	4863	XP_027345912.1_DNA-directed RNA polymerase III subunit 1 [Abrus precatorius]	AT5G60040.1_nuclear RNA polymerase C1, GeneName=NRPC1	IPR007080_RNA polymerase Rpb1, domain 1; IPR007083_RNA polymerase Rpb1, domain 4; IPR007066_RNA polymerase Rpb1, domain 3; IPR007081_RNA polymerase Rpb1, domain 5; IPR006592_RNA polymerase, N-terminal; IPR000722_RNA polymerase, alpha subunit	30.4533	11.47	7.96333	9.93	56.12	18.71	16.53	11.91	12.41	10.09	2.84	9.84	11.21	7.85	10.58	11.36
Am_HQ_1032	4836	GAU23361.1_hypothetical protein TSUD_334080 [Trifolium subterraneum]	AT4G23160.3_cysteine-rich RECEPTOR-like kinase, GeneName=CRK8	IPR001878_Zinc finger, CCHC-type; IPR036875_Zinc finger, CCHC-type superfamily	1.77667	6.65667	4.65	4.85333	0.81	2.27	2.25	3.31	8.72	7.94	1.94	6.15	5.86	1.85	7.48	5.23
Am_HQ_1033	4829	XP_019451778.1_PREDICTED: uncharacterized protein LOC109353873 [Lupinus angustifolius]	AT4G28600.2_no pollen germination related 2, GeneName=NPGR2	IPR025558_Domain of unknown function DUF4283	1.5	5.06	3.21333	3.28	1.7	1.6	1.2	3.66	5.01	6.51	1.48	2.79	5.37	2.41	3.21	4.22
Am_HQ_1037	4840	XP_024635983.1_uncharacterized protein LOC112420493 [Medicago truncatula] XP_024635984.1 uncharacterized protein LOC112420493 [Medicago truncatula] RHN69268.1 hypothetical protein MtrunA17_Chr3g0122841 [Medicago truncatula]	AT1G27850.1_RUN/FYVE domain protein	.	2.08333	6.97	6.57	5.39	2.18	1.79	2.28	6.35	8.06	6.5	4.71	7.6	7.4	4.51	6.3	5.36
Am_HQ_1038	4756	XP_004508092.1_pleiotropic drug resistance protein 3-like isoform X3 [Cicer arietinum]	AT3G53480.1_pleiotropic drug resistance 9, GeneName=ABCG37	IPR029481_ABC-transporter, N-terminal domain; IPR027417_P-loop containing nucleoside triphosphate hydrolase; IPR003593_AAA+ ATPase domain; IPR013525_ABC-2 type transporter; IPR003439_ABC transporter-like, ATP-binding domain; IPR043926_ABC transporter family G domain; IPR013581_Plant PDR ABC transporter associated	66.1733	49.34	29.9833	26.72	61.17	67.95	69.4	41.41	60.37	46.24	15.03	36	38.92	28.31	26.37	25.48
Am_HQ_1040	4851	XP_004516231.1_protein transport protein SEC31 homolog B [Cicer arietinum]	AT3G63460.1_transducin family protein / WD-40 repeat family protein	IPR001680_WD40 repeat; IPR036322_WD40-repeat-containing domain superfamily; IPR024298_Ancestral coatomer element 1, Sec16/Sec31	12.64	18.3733	15.6567	13.8367	15.1	9.98	12.84	16.97	21.75	16.4	13.49	17.39	16.09	12	16.05	13.46
Am_HQ_1041	4855	XP_045815894.1_ABC transporter D family member 1-like [Trifolium pratense]	AT4G39850.4_peroxisomal ABC transporter 1, GeneName=ABCD1	IPR003439_ABC transporter-like, ATP-binding domain; IPR011527_ABC transporter type 1, transmembrane domain; IPR003593_AAA+ ATPase domain; IPR027417_P-loop containing nucleoside triphosphate hydrolase; IPR036640_ABC transporter type 1, transmembrane domain superfamily	31.9	39.7567	42.2133	33.66	26.89	33.56	35.25	37.88	39.75	41.64	27.8	49.39	49.45	30.85	34	36.13
Am_HQ_1043	4850	RZC15285.1_CHD3-type chromatin-remodeling factor PICKLE isoform A, partial [Glycine soja]	AT2G25170.3_chromatin remodeling factor CHD3 (PICKLE), GeneName=PKL	IPR016197_Chromo-like domain superfamily; IPR001965_Zinc finger, PHD-type; IPR014001_Helicase superfamily 1/2, ATP-binding domain; IPR019787_Zinc finger, PHD-finger; IPR000330_SNF2, N-terminal; IPR023780_Chromo domain; IPR000953_Chromo/chromo shadow domain; IPR027417_P-loop containing nucleoside triphosphate hydrolase; IPR001650_Helicase, C-terminal; IPR009463_Domain of unknown function DUF1087	2.48333	6.51	5.57	5.51333	2.19	3.42	1.84	5.92	6.97	6.64	2.05	7.64	7.02	3.58	5.91	7.05
Am_HQ_1045	4861	XP_027368282.1_uncharacterized protein LOC113874249 [Abrus precatorius]	.	IPR001878_Zinc finger, CCHC-type; IPR036875_Zinc finger, CCHC-type superfamily	0.256667	0.996667	0.776667	0.646667	0.26	0.13	0.38	0.39	0.97	1.63	0.56	0.57	1.2	0.32	0.84	0.78
Am_HQ_1046	4753	XP_045826970.1_uncharacterized protein LOC123918852 isoform X3 [Trifolium pratense]	AT5G56930.1_CCCH-type zinc finger family protein, GeneName=EMB1789	IPR036855_Zinc finger, CCCH-type superfamily; IPR000571_Zinc finger, CCCH-type	64.3033	59.89	65.5	66.0333	88.56	61.76	42.59	59.12	61.28	59.27	69.2	65.74	61.56	64.39	70.28	63.43
Am_HQ_1048	4851	RVW82526.1_Retrovirus-related Pol polyprotein from transposon TNT 1-94 [Vitis vinifera]	AT4G23160.3_cysteine-rich RECEPTOR-like kinase, GeneName=CRK8	.	1.11333	1.79667	1.30333	1.64	1.52	0.85	0.97	1.69	2.17	1.53	1.33	1.31	1.27	1.53	1.66	1.73
Am_HQ_1049	4748	KAG4386425.1_hypothetical protein GLYMA_11G040200v4 [Glycine max] KAH1157509.1 hypothetical protein GYH30_029967 [Glycine max]	AT5G47010.1_RNA helicase, GeneName=LBA1	IPR041679_DNA2/NAM7 helicase-like, C-terminal; IPR041677_DNA2/NAM7 helicase, helicase domain; IPR027417_P-loop containing nucleoside triphosphate hydrolase	4.69667	4.13	2.89	3.65	4.07	5.66	4.36	4.2	4.96	3.23	1.82	4.32	2.53	2.63	4.4	3.92
Am_HQ_1050	4846	XP_027192649.1_LOW QUALITY PROTEIN: uncharacterized protein LOC101498669 [Cicer arietinum]	AT1G70620.5_cyclin-like protein	IPR031937_PNN-interacting serine/arginine-rich protein	1.57667	4.49	2.35333	2.78667	3.27	0	1.46	4.91	3.16	5.4	0	1.56	5.5	0	3.28	5.08
Am_HQ_1051	4729	XP_004486707.1_pleiotropic drug resistance protein 1-like [Cicer arietinum]	AT1G15520.1_pleiotropic drug resistance 12, GeneName=ABCG40	IPR003593_AAA+ ATPase domain; IPR027417_P-loop containing nucleoside triphosphate hydrolase; IPR003439_ABC transporter-like, ATP-binding domain; IPR013581_Plant PDR ABC transporter associated; IPR013525_ABC-2 type transporter; IPR043926_ABC transporter family G domain; IPR029481_ABC-transporter, N-terminal domain	108.44	247.71	119.64	118.027	32.24	154.26	138.82	180.1	252.12	310.91	54.64	133.7	170.58	105.26	120.77	128.05
Am_HQ_1054	4848	XP_045794517.1_RAB11-binding protein RELCH homolog isoform X3 [Trifolium pratense]	AT5G16210.1_HEAT repeat-containing protein	IPR016024_Armadillo-type fold	6.89	16	12.3533	13.84	8.37	8.96	3.34	13.65	18.55	15.8	14.02	12.24	10.8	14.74	14.06	12.72
Am_HQ_1055	4804	KEH17686.1_LRR and NB-ARC domain disease resistance protein [Medicago truncatula]	AT3G14470.1_NB-ARC domain-containing disease resistance protein	.	0.0933333	0.0966667	0.223333	0.34	0.05	0.11	0.12	0.02	0.12	0.15	0.08	0.44	0.15	0.21	0.62	0.19
Am_HQ_1056	4845	XP_027349722.1_ubiquitin carboxyl-terminal hydrolase 5 isoform X2 [Abrus precatorius]	AT2G40930.2_ubiquitin-specific protease 5, GeneName=UBP5	IPR006615_Peptidase C19, ubiquitin-specific peptidase, DUSP domain; IPR035927_DUSP-like superfamily; IPR001394_Peptidase C19, ubiquitin carboxyl-terminal hydrolase; IPR038765_Papain-like cysteine peptidase superfamily	0.493333	0.996667	0.823333	0.66	0.55	0.55	0.38	0.83	0.91	1.25	0.51	1.23	0.73	0.46	0.76	0.76
Am_HQ_1059	4787	XP_004489931.1_uncharacterized protein LOC101505283 isoform X2 [Cicer arietinum]	AT3G52250.1_Duplicated homeodomain-like superfamily protein	IPR001005_SANT/Myb domain; IPR017930_Myb domain; IPR009057_Homeobox-like domain superfamily	37.5767	15.2433	13.83	17.3067	61.55	22.24	28.94	13.29	18.95	13.49	16.32	11.99	13.18	18.98	17.18	15.76
Am_HQ_1060	4834	XP_045787437.1_FIP1[V]-like protein isoform X2 [Trifolium pratense]	AT5G58040.2_FIP1[V]-like protein, GeneName=FIP1[V]	IPR007854_Pre-mRNA polyadenylation factor Fip1 domain	56.76	21.8233	19.0967	25.88	83.29	38.47	48.52	19.46	26.09	19.92	13.02	23.91	20.36	22.33	25.28	30.03
Am_HQ_1062	4644	XP_004515667.1_uncharacterized protein LOC101488965 isoform X2 [Cicer arietinum]	AT1G77800.4_PHD finger family protein	IPR001965_Zinc finger, PHD-type; IPR011011_Zinc finger, FYVE/PHD-type	1.10333	3.15667	3.85667	3.97667	1.25	1.23	0.83	3.64	2.73	3.1	6.29	3.04	2.24	4.65	4.22	3.06
Am_HQ_1064	4801	XP_045802630.1_uncharacterized protein LOC123896262 [Trifolium pratense]	AT4G20520.1_RNA binding / RNA-directed DNA polymerase	IPR036691_Endonuclease/exonuclease/phosphatase superfamily	2.31	5.10667	4.01	5.30333	2.77	2.35	1.81	4.27	5.67	5.38	2.82	4.56	4.65	4.17	5.85	5.89
Am_HQ_1066	4835	XP_027188766.1_TMV resistance protein N isoform X2 [Cicer arietinum]	AT5G17680.1_disease resistance protein (TIR-NBS-LRR class)	IPR001611_Leucine-rich repeat; IPR036390_Winged helix DNA-binding domain superfamily; IPR011713_Leucine-rich repeat 3	1.65	8.50333	9.24333	10.2867	0.58	2.24	2.13	4.84	7.48	13.19	3.12	9.17	15.44	6.01	7.62	17.23
Am_HQ_1069	4804	XP_004491557.1_FT-interacting protein 7-like [Cicer arietinum]	AT1G51570.1_Calcium-dependent lipid-binding (CaLB domain) plant phosphoribosyltransferase family protein	IPR035892_C2 domain superfamily; IPR000008_C2 domain; IPR013583_Phosphoribosyltransferase C-terminal	5.57667	13.06	9.65333	10.35	7	5.72	4.01	11.62	16.49	11.07	5.66	12.19	11.11	8.99	13.03	9.03
Am_HQ_1070	4816	KZV25004.1_Cysteine-rich RLK (receptor-like protein kinase) 8 [Dorcoceras hygrometricum]	AT4G23160.3_cysteine-rich RECEPTOR-like kinase, GeneName=CRK8	IPR012337_Ribonuclease H-like superfamily; IPR043502_DNA/RNA polymerase superfamily; IPR001584_Integrase, catalytic core; IPR013103_Reverse transcriptase, RNA-dependent DNA polymerase	8.82667	48.5833	82.0867	14.0633	14.14	8.25	4.09	40.77	56.26	48.72	70.63	81.83	93.8	9.71	19.36	13.12
Am_HQ_1071	4829	XP_019104280.1_PREDICTED: uncharacterized protein LOC109134684 [Beta vulgaris subsp. vulgaris]	ATMG00860.1_DNA/RNA polymerases superfamily protein, GeneName=ORF158	IPR041577_Reverse transcriptase/retrotransposon-derived protein, RNase H-like domain; IPR043502_DNA/RNA polymerase superfamily; IPR000477_Reverse transcriptase domain	4.69667	1.17667	0.63	0.806667	7.73	3.58	2.78	0.83	1.6	1.1	0.27	0.79	0.83	0.65	0.87	0.9
Am_HQ_1073	4816	XP_045801555.1_paired amphipathic helix protein Sin3-like 4 isoform X3 [Trifolium pratense]	AT1G70060.1_SIN3-like 4, GeneName=SNL4	IPR013194_Histone deacetylase interacting domain; IPR036600_Paired amphipathic helix superfamily; IPR031693_Sin3, C-terminal; IPR003822_Paired amphipathic helix	4.78667	18.1967	13.6467	13.0167	2.69	5.2	6.47	16.88	20.25	17.46	13.52	14.38	13.04	13.21	11.03	14.81
Am_HQ_1075	4830	BAG72151.1_hypothetical protein [Lotus japonicus]	AT1G75630.1_vacuolar H+-pumping ATPase 16 kDa proteolipid subunit 4, GeneName=AVA-P4	IPR000477_Reverse transcriptase domain; IPR043502_DNA/RNA polymerase superfamily; IPR041577_Reverse transcriptase/retrotransposon-derived protein, RNase H-like domain	2.43333	2.64333	1.49333	2.12667	2.22	1.92	3.16	2.97	2.51	2.45	0.61	1.87	2	2.14	2.1	2.14
Am_HQ_1076	4778	KAG4399399.1_hypothetical protein GLYMA_08G222400v4 [Glycine max]	AT4G31480.6_Coatomer, beta subunit	IPR016460_Coatomer beta subunit (COPB1); IPR011710_Coatomer beta subunit, C-terminal; IPR016024_Armadillo-type fold; IPR029446_Coatomer beta subunit, appendage platform domain; IPR002553_Clathrin/coatomer adaptor, adaptin-like, N-terminal	4.07333	5.97333	7.61667	8.35333	2.94	5.99	3.29	4.79	8.34	4.79	7.39	8.85	6.61	7.21	9.04	8.81
Am_HQ_1078	4824	XP_020225834.1_disease resistance protein RPP2B [Cajanus cajan]	AT5G17680.2_disease resistance protein (TIR-NBS-LRR class)	IPR027417_P-loop containing nucleoside triphosphate hydrolase; IPR002182_NB-ARC	0.0566667	1.19	0.516667	1.29333	0.09	0.08	0	2.27	0.37	0.93	0.42	0.36	0.77	1.45	0.81	1.62
Am_HQ_1081	4824	XP_004505301.1_protein NAP1 [Cicer arietinum]	AT2G35110.2_transcription activator, GeneName=GRL	IPR019137_Nck-associated protein 1	8.41667	10.4333	12.2733	19.8033	4.72	11.8	8.73	7.75	12.32	11.23	11.77	12.54	12.51	18.84	17.85	22.72
Am_HQ_1082	4800	XP_004489757.1_inactive poly [ADP-ribose] polymerase RCD1-like [Cicer arietinum]	AT2G35510.2_similar to RCD one 1, GeneName=SRO1	IPR037197_WWE domain superfamily; IPR004170_WWE domain	4.71333	10.2067	7.30667	9.31	4.99	6.21	2.94	10.95	12.32	7.35	5.78	8.18	7.96	8.84	10.64	8.45
Am_HQ_1083	4811	XP_013444805.1_TMV resistance protein N [Medicago truncatula] KEH18830.1 disease resistance protein (TIR-NBS-LRR class), putative [Medicago truncatula] RHN39863.1 putative TIR domain, winged helix-turn-helix DNA-binding domain-containing protein [Medicago truncatula]	AT5G17680.1_disease resistance protein (TIR-NBS-LRR class)	IPR000157_Toll/interleukin-1 receptor homology (TIR) domain; IPR035897_Toll/interleukin-1 receptor homology (TIR) domain superfamily; IPR036390_Winged helix DNA-binding domain superfamily; IPR002182_NB-ARC; IPR027417_P-loop containing nucleoside triphosphate hydrolase	5.49	3.67667	2.64333	5.62	1.6	10.8	4.07	2.12	5.2	3.71	0.48	5.76	1.69	7.34	5.18	4.34
Am_HQ_1086	4821	QGZ00351.1_ABC transporter G family [Fusarium keratoplasticum]	AT4G15230.4_pleiotropic drug resistance 2, GeneName=ABCG30	IPR003439_ABC transporter-like, ATP-binding domain; IPR027417_P-loop containing nucleoside triphosphate hydrolase; IPR003593_AAA+ ATPase domain; IPR029481_ABC-transporter, N-terminal domain; IPR013525_ABC-2 type transporter; IPR010929_CDR ABC transporter	3.26	0	0	0	0.02	0.79	8.97	0	0	0	0	0	0	0	0	0
Am_HQ_1089	4737	XP_027353706.1_E3 ubiquitin-protein ligase RKP isoform X1 [Abrus precatorius]	AT2G22010.1_related to KPC1, GeneName=RKP	IPR003877_SPRY domain; IPR019474_Ubiquitin conjugation factor E4, core; IPR045737_E3 ubiquitin-protein ligase RKP, N-terminal; IPR013320_Concanavalin A-like lectin/glucanase domain superfamily	10.88	15.8767	13.58	14.53	7.73	12.32	12.59	17.07	17.18	13.38	10.2	14.19	16.35	11.49	14.59	17.51
Am_HQ_1090	4766	XP_024627197.1_phospholipid-transporting ATPase 1 isoform X1 [Medicago truncatula] XP_024627198.1 phospholipid-transporting ATPase 1 isoform X1 [Medicago truncatula] XP_024627199.1 phospholipid-transporting ATPase 1 isoform X1 [Medicago truncatula] XP_039684010.1 phospholipid-transporting ATPase 1 isoform X1 [Medicago truncatula] KEH23276.1 phospholipid-transporting ATPase-like protein [Medicago …	AT5G04930.1_aminophospholipid ATPase 1, GeneName=ALA1	IPR032631_P-type ATPase, N-terminal; IPR036412_HAD-like superfamily; IPR006539_P-type ATPase, subfamily IV; IPR001757_P-type ATPase; IPR032630_P-type ATPase, C-terminal; IPR008250_P-type ATPase, A domain superfamily; IPR023298_P-type ATPase, transmembrane domain superfamily; IPR023299_P-type ATPase, cytoplasmic domain N	38.7333	23.1	39.66	35.3	42.65	34.49	39.06	19.19	27.77	22.34	37.45	41.24	40.29	32.11	35.96	37.83
Am_HQ_1092	4773	XP_045796763.1_LOW QUALITY PROTEIN: uncharacterized protein LOC123891026 [Trifolium pratense]	AT5G24710.1_Transducin/WD40 repeat-like superfamily protein	IPR036322_WD40-repeat-containing domain superfamily; IPR001680_WD40 repeat	5.65333	13.7933	16.3167	15.9633	3.55	9.17	4.24	10.81	16.29	14.28	14.13	17.66	17.16	13.88	14.11	19.9
Am_HQ_1093	4818	XP_012571322.1_probable serine/threonine-protein kinase WNK4 [Cicer arietinum]	AT3G51630.2_with no lysine (K) kinase 5, GeneName=WNK5	IPR002885_Pentatricopeptide repeat	4.7	19.03	16.57	12.75	5.79	4.65	3.66	19.17	19.84	18.08	16.99	16.76	15.96	11.02	14.6	12.63
Am_HQ_1102	4805	XP_027367892.1_pinin [Abrus precatorius]	AT1G15200.2_protein-protein interaction regulator family protein	IPR002885_Pentatricopeptide repeat; IPR011990_Tetratricopeptide-like helical domain superfamily	18.17	9.9	8.1	7.41	23.77	14.38	16.36	9.85	10.74	9.11	6.95	9.5	7.85	6.95	6.84	8.44
Am_HQ_1104	4764	RHN69276.1_putative RNA-directed DNA polymerase [Medicago truncatula]	AT4G23160.3_cysteine-rich RECEPTOR-like kinase, GeneName=CRK8	IPR012337_Ribonuclease H-like superfamily; IPR013103_Reverse transcriptase, RNA-dependent DNA polymerase; IPR025724_GAG-pre-integrase domain; IPR043502_DNA/RNA polymerase superfamily	5.89333	14.72	15.29	11.84	6.94	0	10.74	11.54	0	32.62	15.54	0	30.33	9.22	0	26.3
Am_HQ_1107	4804	XP_045825510.1_MAP3K epsilon protein kinase 1-like isoform X2 [Trifolium pratense]	AT3G13530.1_mitogen-activated protein kinase kinase kinase 7, GeneName=MAPKKK7	IPR011009_Protein kinase-like domain superfamily; IPR000719_Protein kinase domain; IPR000225_Armadillo; IPR016024_Armadillo-type fold; IPR001245_Serine-threonine/tyrosine-protein kinase, catalytic domain	21.38	13.2667	17.7033	21.1233	22.88	18.38	22.88	11.85	16.15	11.8	16.3	19.59	17.22	18.07	21.38	23.92
Am_HQ_1109	4806	XP_004502920.1_zinc finger CCCH domain-containing protein 38-like [Cicer arietinum] XP_012571935.1 zinc finger CCCH domain-containing protein 38-like [Cicer arietinum] XP_012571936.1 zinc finger CCCH domain-containing protein 38-like [Cicer arietinum] XP_027190231.1 zinc finger CCCH domain-containing protein 38-like [Cicer arietinum]	AT3G18640.1_Zinc finger C-x8-C-x5-C-x3-H type family protein	IPR000571_Zinc finger, CCCH-type; IPR036855_Zinc finger, CCCH-type superfamily	2.14667	5.72333	3.77667	4.56333	1.79	4.65	0	4.14	4.62	8.41	0	5.91	5.42	3.07	5.24	5.38
Am_HQ_1111	4778	TKY71874.1_STICHEL 3 protein [Spatholobus suberectus]	AT4G18820.1_AAA-type ATPase family protein	IPR022754_DNA polymerase III, gamma subunit, domain III; IPR008921_DNA polymerase III, clamp loader complex, gamma/delta/delta subunit, C-terminal; IPR003593_AAA+ ATPase domain; IPR027417_P-loop containing nucleoside triphosphate hydrolase; IPR012763_DNA polymerase III, subunit gamma/ tau, N-terminal	1.88	3.50667	6.88333	6.17	0.99	3.07	1.58	2.59	4.35	3.58	5.44	8.21	7	7.41	3.96	7.14
Am_HQ_1112	4746	PNY08578.1_condensin complex subunit 1-like protein [Trifolium pratense]	AT3G57060.2_binding protein	IPR007673_Condensin subunit 1; IPR032682_Condensin complex subunit 1, C-terminal; IPR024324_Condensin complex subunit 1, N-terminal; IPR016024_Armadillo-type fold	0.103333	1.06667	4.37667	2.35	0.12	0.11	0.08	0.66	1.65	0.89	4.01	4.59	4.53	1.19	1.47	4.39
Am_HQ_1114	4802	XP_004492112.1_uncharacterized protein LOC101494130 [Cicer arietinum]	AT3G12590.1_hypothetical protein	.	8.21667	6.77333	5.9	7.01333	5.79	6.7	12.16	6.04	8.18	6.1	5.03	6.63	6.04	6.64	7.6	6.8
Am_HQ_1116	4753	TKY62474.1_HUA2 protein 2 [Spatholobus suberectus]	AT3G63070.1_Tudor/PWWP/MBT domain-containing protein	IPR006569_CID domain; IPR000313_PWWP domain	41.6967	22.5833	15.8533	19.04	72.74	28.76	23.59	27.18	24.45	16.12	12.5	18.14	16.92	20.32	20.23	16.57
Am_HQ_1118	4729	XP_013469402.1_pleiotropic drug resistance protein 2 [Medicago truncatula] KEH43440.1 drug resistance transporter-like ABC domain protein [Medicago truncatula] RHN81373.1 putative iron-chelate-transporting ATPase [Medicago truncatula]	AT2G36380.1_pleiotropic drug resistance 6, GeneName=ABCG34	IPR027417_P-loop containing nucleoside triphosphate hydrolase; IPR003439_ABC transporter-like, ATP-binding domain; IPR043926_ABC transporter family G domain; IPR013525_ABC-2 type transporter; IPR013581_Plant PDR ABC transporter associated; IPR029481_ABC-transporter, N-terminal domain; IPR003593_AAA+ ATPase domain	2.46667	58.57	31.0867	14.63	0.93	4.36	2.11	80.41	46.95	48.35	23.51	30.13	39.62	15.61	13.83	14.45
Am_HQ_1120	4801	XP_012571469.1_NPC intracellular cholesterol transporter 1 [Cicer arietinum]	AT1G42470.1_Patched family protein	IPR032190_Niemann-Pick C1, N-terminal; IPR004765_NPC1-like; IPR003392_Protein patched/dispatched	19.1067	35.9833	42.33	46.1367	17.14	28.34	11.84	46.78	31.8	29.37	31.91	39.17	55.91	46.32	40.79	51.3
Am_HQ_1122	4795	XP_045787641.1_cyclin-T1-3-like isoform X3 [Trifolium pratense]	AT4G19600.1_Cyclin family protein, GeneName=CYCT1;4	IPR006671_Cyclin, N-terminal; IPR036915_Cyclin-like superfamily; IPR013763_Cyclin-like	3.84	4.58333	5.39667	5.51333	5.82	3.71	1.99	3.68	6.01	4.06	2.47	6.61	7.11	5.99	6.2	4.35
Am_HQ_1124	4784	XP_029129176.1_probable serine/threonine-protein kinase drkD [Cajanus cajan]	AT1G79570.4_kinase superfamily with octicosapeptide/Phox/Bem1p domain-containing protein	IPR000270_PB1 domain	0.0333333	0.38	0.04	0.296667	0.1	0	0	0.41	0.25	0.48	0.12	0	0	0.51	0.28	0.1
Am_HQ_1126	4793	PNX92266.1_retrotransposon-related protein [Trifolium pratense]	AT1G53850.2_20S proteasome alpha subunit E1, GeneName=PAE1	IPR023780_Chromo domain; IPR016197_Chromo-like domain superfamily; IPR012337_Ribonuclease H-like superfamily	0.53	1.57333	1.53667	1.87333	0.23	1.09	0.27	1.78	2.08	0.86	1.01	1.66	1.94	0.95	1.78	2.89
Am_HQ_1128	4750	KAG4387778.1_hypothetical protein GLYMA_09G041400v4 [Glycine max] KAH1041411.1 hypothetical protein GYH30_023985 [Glycine max]	AT3G16785.6_phospholipase D P1, GeneName=PLDP1	.	0.233333	0.08	0.0866667	0.136667	0.4	0.12	0.18	0.07	0.11	0.06	0.03	0.11	0.12	0.14	0.11	0.16
Am_HQ_1131	4780	XP_004495082.1_protein CHROMATIN REMODELING 8 [Cicer arietinum]	AT2G18760.2_chromatin remodeling 8, GeneName=CHR8	IPR001650_Helicase, C-terminal; IPR014001_Helicase superfamily 1/2, ATP-binding domain; IPR027417_P-loop containing nucleoside triphosphate hydrolase; IPR000330_SNF2, N-terminal	8.02667	12.6767	11.8533	15.1533	11.35	7.8	4.93	12.52	13.76	11.75	7.27	14.42	13.87	11.76	17.03	16.67
Am_HQ_1132	4790	XP_045797186.1_uncharacterized protein LOC123891371 isoform X2 [Trifolium pratense]	AT5G38880.1_HAUS augmin-like complex subunit, GeneName=44778	.	1.88	4.39667	4.64667	3.98	2.03	1.91	1.7	3.88	4.56	4.75	4.43	4.6	4.91	4.69	3.32	3.93
Am_HQ_1134	4710	XP_003535149.1_ABC transporter B family member 1 [Glycine max] XP_028185093.1 ABC transporter B family member 1-like [Glycine soja] KAG4996198.1 hypothetical protein JHK85_027637 [Glycine max] KAG5003000.1 hypothetical protein JHK86_027139 [Glycine max] KAG5126177.1 hypothetical protein JHK82_027012 [Glycine max] KAG5150772.1 hypothetical protein JHK84_027244 [Glycine max] KAH1136929.1 hypothetic…	AT2G36910.1_ATP binding cassette subfamily B1, GeneName=ABCB1	IPR011527_ABC transporter type 1, transmembrane domain; IPR027417_P-loop containing nucleoside triphosphate hydrolase; IPR036640_ABC transporter type 1, transmembrane domain superfamily; IPR003593_AAA+ ATPase domain; IPR003439_ABC transporter-like, ATP-binding domain	1.02333	1.21	3.62	6.59333	1.68	1.1	0.29	0.55	2.22	0.86	3.06	4.17	3.63	6.27	5.33	8.18
Am_HQ_1135	4788	XP_045804273.1_diacylglycerol kinase 1-like [Trifolium pratense]	AT2G20900.3_diacylglycerol kinase 5, GeneName=DGK5	IPR016064_NAD kinase/diacylglycerol kinase-like domain superfamily; IPR000756_Diacylglycerol kinase, accessory domain	3.67333	0.336667	0.21	1.76	1.15	2.92	6.95	0.95	0	0.06	0.31	0.24	0.08	5.01	0	0.27
Am_HQ_1137	4741	XP_004490094.1_protein SHORT ROOT IN SALT MEDIUM 1 isoform X1 [Cicer arietinum]	AT2G03150.1_ATP/GTP-binding protein family, GeneName=emb1579	IPR045354_BURAN domain; IPR025954_DBC1/CARP1 catalytically inactive NUDIX hydrolase domain; IPR011992_EF-hand domain pair; IPR045353_LAIKA domain	39.1833	70.4633	51.0233	58.3633	33.4	35.36	48.79	74.65	74.11	62.63	45.05	55.16	52.86	48.1	55.22	71.77
Am_HQ_1139	4628	XP_004505923.1_DNA-directed RNA polymerase III subunit 1 [Cicer arietinum]	AT5G60040.1_nuclear RNA polymerase C1, GeneName=NRPC1	IPR007066_RNA polymerase Rpb1, domain 3; IPR006592_RNA polymerase, N-terminal; IPR007081_RNA polymerase Rpb1, domain 5; IPR000722_RNA polymerase, alpha subunit; IPR007080_RNA polymerase Rpb1, domain 1; IPR007083_RNA polymerase Rpb1, domain 4	33.1667	3.28667	5.65667	12.6567	60.92	17.47	21.11	3.57	3.61	2.68	5.02	6.45	5.5	9.89	12.36	15.72
Am_HQ_1140	4788	XP_045796943.1_ethylene response sensor 1 [Trifolium pratense]	AT2G40940.1_ethylene response sensor 1, GeneName=ERS1	IPR003018_GAF domain	1.28	0.273333	3.56667	0.983333	2.27	1.28	0.29	0.06	0.44	0.32	2.76	4.38	3.56	0	2.69	0.26
Am_HQ_1141	4758	TKY52976.1_Ethylene-insensitive protein 2 [Spatholobus suberectus]	AT5G03280.1_NRAMP metal ion transporter family protein, GeneName=EIN2	IPR017187_Ethylene-insensitive protein 2; IPR001046_NRAMP family	2.29333	2.59	15.9733	5.78333	0	3.97	2.91	0.94	1.9	4.93	27.46	15.9	4.56	8.13	5.12	4.1
Am_HQ_1143	4735	XP_013444805.1_TMV resistance protein N [Medicago truncatula] KEH18830.1 disease resistance protein (TIR-NBS-LRR class), putative [Medicago truncatula] RHN39863.1 putative TIR domain, winged helix-turn-helix DNA-binding domain-containing protein [Medicago truncatula]	AT5G17680.1_disease resistance protein (TIR-NBS-LRR class)	IPR000157_Toll/interleukin-1 receptor homology (TIR) domain; IPR035897_Toll/interleukin-1 receptor homology (TIR) domain superfamily; IPR036390_Winged helix DNA-binding domain superfamily; IPR002182_NB-ARC; IPR027417_P-loop containing nucleoside triphosphate hydrolase	43.25	17.58	15.7467	32.03	36.75	58.81	34.19	10.12	31.42	11.2	9.7	24.66	12.88	18.47	52.98	24.64
Am_HQ_1148	4780	TKY44693.1_Lysine-specific histone demethylase 1-like 1 [Spatholobus suberectus]	AT1G62830.1_LSD1-like 1, GeneName=LDL1	IPR036188_FAD/NAD(P)-binding domain superfamily; IPR007526_SWIRM domain; IPR009057_Homeobox-like domain superfamily; IPR002937_Amine oxidase	5.82333	4.89667	3.86667	6.08	10.42	1.34	5.71	4.16	2.47	8.06	2.52	1.75	7.33	4.33	2.71	11.2
Am_HQ_1152	4758	XP_003518631.1_RAB11-binding protein RELCH isoform X3 [Glycine max] XP_028200516.1 RAB11-binding protein RELCH isoform X2 [Glycine soja] KAG5079513.1 hypothetical protein JHK86_003578 [Glycine max] KAH1059440.1 hypothetical protein GYH30_003455 [Glycine max] KRH70407.1 hypothetical protein GLYMA_02G089000v4 [Glycine max] RZC24063.1 LisH domain and HEAT repeat-containing protein KIAA1468-like [Gly…	AT5G16210.1_HEAT repeat-containing protein	IPR016024_Armadillo-type fold; IPR006594_LIS1 homology motif	0.08	0.06	0	0.226667	0	0	0.24	0.18	0	0	0	0	0	0	0.43	0.25
Am_HQ_1155	4769	RVW89581.1_Retrovirus-related Pol polyprotein from transposon TNT 1-94 [Vitis vinifera]	AT4G23160.3_cysteine-rich RECEPTOR-like kinase, GeneName=CRK8	IPR012337_Ribonuclease H-like superfamily; IPR043502_DNA/RNA polymerase superfamily; IPR013103_Reverse transcriptase, RNA-dependent DNA polymerase; IPR001584_Integrase, catalytic core	0	2.04333	4.50667	0	0	0	0	3.73	0.53	1.87	1.35	7.11	5.06	0	0	0
Am_HQ_1162	4774	XP_004487658.1_myosin-2 [Cicer arietinum]	AT5G54280.2_myosin 2, GeneName=ATM2	IPR000048_IQ motif, EF-hand binding site; IPR001609_Myosin head, motor domain; IPR027417_P-loop containing nucleoside triphosphate hydrolase	3.51	9.54667	14.22	7.46333	2.93	2.36	5.24	11.32	9.98	7.34	11.86	15.35	15.45	5.57	8.17	8.65
Am_HQ_1168	4754	XP_027186047.1_helicase-like transcription factor CHR28 isoform X2 [Cicer arietinum]	AT1G61140.3_SNF2 domain-containing protein / helicase domain-containing protein / zinc finger protein-like protein, GeneName=EDA16	IPR027417_P-loop containing nucleoside triphosphate hydrolase; IPR000330_SNF2, N-terminal	14.2967	9.22	6.30667	9.78	9.68	14.79	18.42	7.6	10.31	9.75	4.93	7.21	6.78	9.54	8.55	11.25
Am_HQ_1169	4770	GAU38922.1_hypothetical protein TSUD_119880 [Trifolium subterraneum]	AT3G14470.1_NB-ARC domain-containing disease resistance protein	IPR041118_Rx, N-terminal; IPR002182_NB-ARC; IPR027417_P-loop containing nucleoside triphosphate hydrolase	2.85333	4.93	8.43667	15.0233	3.25	3.24	2.07	3.64	7.11	4.04	5.19	11.18	8.94	12.16	16.94	15.97
Am_HQ_1173	4766	XP_027362302.1_regulator of nonsense transcripts 1 homolog isoform X1 [Abrus precatorius]	AT5G47010.1_RNA helicase, GeneName=LBA1	IPR006935_Helicase/UvrB, N-terminal; IPR027417_P-loop containing nucleoside triphosphate hydrolase; IPR041679_DNA2/NAM7 helicase-like, C-terminal; IPR018999_RNA helicase UPF1, Cys/His rich zinc-binding domain; IPR041677_DNA2/NAM7 helicase, helicase domain; IPR040812_RNA helicase UPF1, 1B domain	59.74	66.9233	56.4433	61.5567	60.93	58.82	59.47	64.18	70.79	65.8	39.66	66.31	63.36	51.84	60.85	71.98
Am_HQ_1174	4597	XP_027367333.1_uncharacterized protein LOC113873417 isoform X2 [Abrus precatorius]	AT3G49490.1_hypothetical protein	.	8.31667	21.4733	17.4	20.17	8.19	11.01	5.75	19.7	25.75	18.97	12.91	19.72	19.57	18.07	22.23	20.21
Am_HQ_1175	4754	XP_004504879.1_K(+) efflux antiporter 3, chloroplastic isoform X1 [Cicer arietinum]	AT4G04850.2_K+ efflux antiporter 3, GeneName=KEA3	IPR006153_Cation/H+ exchanger; IPR036291_NAD(P)-binding domain superfamily; IPR003148_Regulator of K+ conductance, N-terminal	0.0733333	6.93	2.90333	1.16	0.08	0.08	0.06	8.85	7.02	4.92	1.1	4	3.61	0.82	1.82	0.84
Am_HQ_1179	4777	MCH79741.1_copia-type polyprotein [Trifolium medium]	AT4G23160.3_cysteine-rich RECEPTOR-like kinase, GeneName=CRK8	IPR012337_Ribonuclease H-like superfamily	0.853333	3.79333	3.94667	4.30333	0.44	1.32	0.8	2.89	3.75	4.74	2.12	4.01	5.71	2.76	4.71	5.44
Am_HQ_1180	4750	BAG72151.1_hypothetical protein [Lotus japonicus]	ATMG00860.1_DNA/RNA polymerases superfamily protein, GeneName=ORF158	IPR043502_DNA/RNA polymerase superfamily; IPR045358_Ty3 transposon capsid-like protein; IPR000477_Reverse transcriptase domain; IPR016197_Chromo-like domain superfamily; IPR021109_Aspartic peptidase domain superfamily; IPR041577_Reverse transcriptase/retrotransposon-derived protein, RNase H-like domain; IPR041588_Integrase zinc-binding domain; IPR012337_Ribonuclease H-like superfamily	18.0967	51.27	31.32	28.0567	22.69	21.09	10.51	47.57	69.89	36.35	23.02	35.74	35.2	32.65	27.35	24.17
Am_HQ_1181	4776	XP_014518263.1_splicing factor 3B subunit 1 [Vigna radiata var. radiata]	AT5G64270.1_splicing factor	IPR015016_Splicing factor 3B subunit 1; IPR016024_Armadillo-type fold; IPR034085_TOG domain	10.8533	13.5033	7.78667	11.17	13.16	7.33	12.07	12.43	8.97	19.11	6.03	5.36	11.97	10.04	8.19	15.28
Am_HQ_1182	4758	XP_003601840.1_serine/threonine protein phosphatase 2A 57 kDa regulatory subunit B&apos; theta isoform [Medicago truncatula] AES72091.1 protein phosphatase 2A regulatory B subunit family protein [Medicago truncatula] RHN69288.1 putative protein phosphatase 2A, regulatory B subunit, B56 [Medicago truncatula]	AT3G26020.3_Protein phosphatase 2A regulatory B subunit family protein	IPR002554_Protein phosphatase 2A, regulatory B subunit, B56; IPR016024_Armadillo-type fold	0.946667	1.20667	0.99	1.2	0.55	1.15	1.14	0.91	1.28	1.43	0.59	1.36	1.02	1.24	1.33	1.03
Am_HQ_1187	4835	XP_004499173.1_auxilin-like protein 1 isoform X1 [Cicer arietinum]	AT1G75310.2_auxin-like 1 protein, GeneName=AUL1	IPR036869_Chaperone J-domain superfamily	17.0367	15.9533	8.79667	13.4733	7.87	31.04	12.2	12.85	23.96	11.05	6.48	12.99	6.92	13.37	18.24	8.81
Am_HQ_1189	4757	XP_004494545.1_pentatricopeptide repeat-containing protein At3g04130, mitochondrial isoform X1 [Cicer arietinum] XP_004494546.1 pentatricopeptide repeat-containing protein At3g04130, mitochondrial isoform X1 [Cicer arietinum]	AT3G04130.2_Tetratricopeptide repeat (TPR)-like superfamily protein	IPR002885_Pentatricopeptide repeat	0.19	0.326667	0.52	0.27	0.23	0	0.34	0.44	0.37	0.17	0.76	0.54	0.26	0.4	0.09	0.32
Am_HQ_1194	4746	XP_045817618.1_DExH-box ATP-dependent RNA helicase DExH7, chloroplastic-like isoform X3 [Trifolium pratense] XP_045817981.1 DExH-box ATP-dependent RNA helicase DExH7, chloroplastic-like isoform X3 [Trifolium pratense]	AT1G58060.1_RNA helicase family protein	IPR014001_Helicase superfamily 1/2, ATP-binding domain; IPR011545_DEAD/DEAH box helicase domain; IPR007502_Helicase-associated domain; IPR001650_Helicase, C-terminal; IPR011709_Domain of unknown function DUF1605; IPR027417_P-loop containing nucleoside triphosphate hydrolase	54.82	10.63	17.6467	15.61	81.86	42.79	39.81	10.59	10.5	10.8	13.7	17.98	21.26	14.24	15.31	17.28
Am_HQ_1199	4754	KAH1224181.1_Subtilisin-like protease SBT1.8 [Glycine max]	AT4G10540.1_Subtilase family protein	.	5.25333	2.94	3.27667	3.47667	7.73	3.35	4.68	2.74	2.91	3.17	4.55	2.72	2.56	3.43	3.47	3.53
Am_HQ_1200	4751	XP_004499912.1_DNA topoisomerase 2 [Cicer arietinum] XP_004517303.1 DNA topoisomerase 2 [Cicer arietinum]	AT3G23890.2_topoisomerase II, GeneName=TOPII	IPR013760_DNA topoisomerase, type IIA-like domain superfamily; IPR036890_Histidine kinase/HSP90-like ATPase superfamily; IPR002205_DNA topoisomerase, type IIA, domain A; IPR001154_DNA topoisomerase II, eukaryotic-type; IPR001241_DNA topoisomerase, type IIA	15.9067	14.13	9.71	12.2633	32.44	2.94	12.34	24.69	3.13	14.57	14.52	3.81	10.8	19.54	2.8	14.45
Am_HQ_1201	4717	XP_045825239.1_putative disease resistance RPP13-like protein 1 [Trifolium pratense]	AT3G14470.1_NB-ARC domain-containing disease resistance protein	IPR027417_P-loop containing nucleoside triphosphate hydrolase	0.8	0.77	0.83	2.06667	1.56	0.07	0.77	0.98	0.58	0.75	0.82	0.93	0.74	2.81	1.86	1.53
Am_HQ_1204	4748	XP_004509840.1_probable alpha,alpha-trehalose-phosphate synthase [UDP-forming] 9 [Cicer arietinum]	AT1G23870.1_trehalose-phosphatase/synthase 9, GeneName=TPS9	IPR003337_Trehalose-phosphatase; IPR006379_HAD-superfamily hydrolase, subfamily IIB; IPR001830_Glycosyl transferase, family 20; IPR036412_HAD-like superfamily	3.79	1.67	3.59	2.58667	2.6	4.55	4.22	2.01	1.58	1.42	1.19	5.63	3.95	2.87	3.43	1.46
Am_HQ_1206	4737	XP_045812988.1_disease resistance protein RPV1-like isoform X1 [Trifolium pratense] XP_045812989.1 disease resistance protein RPV1-like isoform X2 [Trifolium pratense] XP_045812990.1 disease resistance protein RPV1-like isoform X1 [Trifolium pratense] XP_045812991.1 disease resistance protein RPV1-like isoform X1 [Trifolium pratense]	AT5G36930.3_Disease resistance protein (TIR-NBS-LRR class) family	IPR035897_Toll/interleukin-1 receptor homology (TIR) domain superfamily; IPR027417_P-loop containing nucleoside triphosphate hydrolase; IPR036390_Winged helix DNA-binding domain superfamily; IPR002182_NB-ARC; IPR000157_Toll/interleukin-1 receptor homology (TIR) domain	15.4	9.73667	6.59	23.6967	5.21	27.66	13.33	9.13	10.43	9.65	5.75	7.39	6.63	31.73	15.54	23.82
Am_HQ_1207	4692	ACJ83732.1_unknown, partial [Medicago truncatula]	AT4G28510.1_prohibitin 1, GeneName=PHB1	.	8.59333	6.16	4.76	11.8567	3.87	12.46	9.45	5.98	6.13	6.37	1.83	6.22	6.23	18.7	6.5	10.37
Am_HQ_1208	4709	XP_004501065.1_uncharacterized protein LOC101491573 isoform X1 [Cicer arietinum]	AT1G27595.1_symplekin	IPR032460_Symplekin/Pta1, N-terminal; IPR022075_Symplekin C-terminal; IPR016024_Armadillo-type fold	12.74	15.41	12.01	13.98	13.41	9.95	14.86	14.4	16.36	15.47	10.03	13.82	12.18	13.94	12.97	15.03
Am_HQ_1214	4757	XP_045822073.1_pleiotropic drug resistance protein 1-like isoform X2 [Trifolium pratense]	AT1G15520.1_pleiotropic drug resistance 12, GeneName=ABCG40	IPR029481_ABC-transporter, N-terminal domain; IPR027417_P-loop containing nucleoside triphosphate hydrolase; IPR013525_ABC-2 type transporter; IPR013581_Plant PDR ABC transporter associated; IPR003439_ABC transporter-like, ATP-binding domain; IPR003593_AAA+ ATPase domain; IPR043926_ABC transporter family G domain	0.516667	2.22333	1.11	12.6	0.25	0.98	0.32	0.41	3.92	2.34	1	1.04	1.29	6.83	18.04	12.93
Am_HQ_1217	4737	XP_045823480.1_putative pentatricopeptide repeat-containing protein At1g12700, mitochondrial [Trifolium pratense] XP_045823481.1 putative pentatricopeptide repeat-containing protein At1g12700, mitochondrial [Trifolium pratense]	AT3G22420.1_with no lysine (K) kinase 2, GeneName=WNK2	IPR002885_Pentatricopeptide repeat	3.50333	5.89	3.75	5.05667	4.34	4.67	1.5	4.11	9.33	4.23	1.93	6.68	2.64	3.36	8.5	3.31
Am_HQ_1221	4715	PNX98514.1_Ty3/gypsy retrotransposon protein, partial [Trifolium pratense]	ATMG00860.1_DNA/RNA polymerases superfamily protein, GeneName=ORF158	IPR000477_Reverse transcriptase domain; IPR043502_DNA/RNA polymerase superfamily	2.02	8.59667	9.3	9.36333	2.15	3.04	0.87	7.39	9.32	9.08	9.04	9.2	9.66	7.56	8.62	11.91
Am_HQ_1222	4667	XP_004499912.1_DNA topoisomerase 2 [Cicer arietinum] XP_004517303.1 DNA topoisomerase 2 [Cicer arietinum]	AT3G23890.1_topoisomerase II, GeneName=TOPII	IPR020568_Ribosomal protein S5 domain 2-type fold; IPR013760_DNA topoisomerase, type IIA-like domain superfamily; IPR002205_DNA topoisomerase, type IIA, domain A; IPR031660_C-terminal associated domain of TOPRIM; IPR013506_DNA topoisomerase, type IIA, subunit B, domain 2; IPR006171_TOPRIM domain; IPR001154_DNA topoisomerase II, eukaryotic-type; IPR001241_DNA topoisomerase, type IIA	0.05	0.613333	4.68667	2.15	0	0.15	0	0.21	1.07	0.56	4.95	4.37	4.74	1.31	0.85	4.29
Am_HQ_1224	4740	XP_004512793.1_uncharacterized protein LOC101509479 [Cicer arietinum]	AT1G18270.1_ketose-bisphosphate aldolase class-II family protein	IPR029154_3-hydroxyisobutyrate dehydrogenase, NAD-binding domain; IPR000771_Fructose-bisphosphate aldolase, class-II; IPR008927_6-phosphogluconate dehydrogenase-like, C-terminal domain superfamily; IPR036291_NAD(P)-binding domain superfamily; IPR010737_Four-carbon acid sugar kinase, N-terminal domain; IPR006115_6-phosphogluconate dehydrogenase, NADP-binding; IPR031475_Four-carbon acid sugar kinas…	33.63	24.5133	29.8833	29.95	22.93	37.44	40.52	19.96	24.97	28.61	21.86	33.15	34.64	22.94	33.38	33.53
Am_HQ_1228	4731	PKI40237.1_hypothetical protein CRG98_039355 [Punica granatum]	AT3G21180.1_autoinhibited Ca(2+)-ATPase 9, GeneName=ACA9	.	2.64667	2.14667	2.76667	3.52333	3.42	2.14	2.38	2.14	2.6	1.7	1.45	4.17	2.68	3.39	4.08	3.1
Am_HQ_1231	4707	XP_004492699.1_tRNA(adenine(34)) deaminase, chloroplastic [Cicer arietinum]	AT1G68720.1_tRNA arginine adenosine deaminase, GeneName=TADA	IPR028883_tRNA-specific adenosine deaminase; IPR016193_Cytidine deaminase-like	4.34667	13.5267	10.3767	13.3133	4.91	5.55	2.58	12.4	15.28	12.9	7.88	11.85	11.4	11.06	13.95	14.93
Am_HQ_1232	4695	XP_004500133.1_uncharacterized protein LOC101507721 isoform X1 [Cicer arietinum]	AT3G18670.1_Ankyrin repeat family protein	IPR036770_Ankyrin repeat-containing domain superfamily; IPR026961_PGG domain; IPR002110_Ankyrin repeat	0.656667	4.21667	3.14667	3.45333	0.99	0.79	0.19	4.04	5.09	3.52	2.14	2.93	4.37	3.6	2.56	4.2
Am_HQ_1233	4728	PNY09881.1_far upstream element-binding protein [Trifolium pratense]	AT2G25970.1_KH domain-containing protein	IPR004088_K Homology domain, type 1; IPR036612_K Homology domain, type 1 superfamily; IPR004087_K Homology domain	2.86	10.4333	5.9	6.85667	1.93	3.7	2.95	6.39	13.31	11.6	2.21	8.92	6.57	4.49	7.06	9.02
Am_HQ_1236	4688	XP_039685595.1_disease resistance protein RUN1-like [Medicago truncatula] RHN39328.1 putative TIR domain, winged helix-turn-helix DNA-binding domain-containing protein [Medicago truncatula]	AT5G17680.2_disease resistance protein (TIR-NBS-LRR class)	IPR035897_Toll/interleukin-1 receptor homology (TIR) domain superfamily; IPR000157_Toll/interleukin-1 receptor homology (TIR) domain; IPR045344_C-JID domain; IPR027417_P-loop containing nucleoside triphosphate hydrolase; IPR002182_NB-ARC	4.55667	8.04	3.20667	11.6733	2.98	6.8	3.89	9.65	7.83	6.64	3.02	3.18	3.42	17.14	8.18	9.7
Am_HQ_1241	4716	XP_012567744.1_sister chromatid cohesion protein PDS5 homolog A isoform X3 [Cicer arietinum]	AT1G77600.1_ARM repeat superfamily protein	IPR016024_Armadillo-type fold	11.2467	11.7	9.18	11.3833	12.35	12.02	9.37	11.3	13.41	10.39	6.83	10.56	10.15	10.4	11.68	12.07
Am_HQ_1244	4721	XP_027345912.1_DNA-directed RNA polymerase III subunit 1 [Abrus precatorius]	AT5G60040.1_nuclear RNA polymerase C1, GeneName=NRPC1	IPR000722_RNA polymerase, alpha subunit; IPR007083_RNA polymerase Rpb1, domain 4; IPR007066_RNA polymerase Rpb1, domain 3; IPR007080_RNA polymerase Rpb1, domain 1; IPR007081_RNA polymerase Rpb1, domain 5; IPR006592_RNA polymerase, N-terminal	2.69	2.53	1.57667	3.79667	1.85	2.83	3.39	1.21	2.63	3.75	1.12	2.12	1.49	2.82	3.74	4.83
Am_HQ_1246	4726	XP_004494433.1_nodal modulator 1 [Cicer arietinum]	AT3G62360.2_Carbohydrate-binding-like fold	IPR013784_Carbohydrate-binding-like fold	0.303333	3.9	1.7	2.31667	0.13	0.67	0.11	0.97	5.18	5.55	0.53	1.77	2.8	0.77	2.67	3.51
Am_HQ_1247	4723	XP_004511755.1_uncharacterized protein LOC101495071 [Cicer arietinum]	AT4G17140.3_pleckstrin homology (PH) domain-containing protein	IPR009543_Vacuolar protein sorting-associated protein 13, SHR-binding domain	31.2767	36.2833	25.2467	32.3767	39.21	31.31	23.31	33.85	37.18	37.82	16.05	28.81	30.88	32.76	32.47	31.9
Am_HQ_1248	4721	XP_045815705.1_abnormal spindle-like microcephaly-associated protein homolog isoform X3 [Trifolium pratense]	AT4G21820.2_binding / calmodulin binding protein	IPR000225_Armadillo; IPR036872_CH domain superfamily; IPR000048_IQ motif, EF-hand binding site; IPR027417_P-loop containing nucleoside triphosphate hydrolase; IPR016024_Armadillo-type fold; IPR001715_Calponin homology domain	0.02	0.143333	1.97	1.26333	0.02	0	0.04	0.05	0.26	0.12	2.33	1.75	1.83	0.81	0.64	2.34
Am_HQ_1250	4721	GAU45439.1_hypothetical protein TSUD_297420 [Trifolium subterraneum]	AT3G17740.1_hypothetical protein	IPR013633_siRNA-mediated silencing protein NRDE-2	5.24	5.2	4.89333	6.04333	5.98	6.11	3.63	5.46	4.2	5.94	3.54	5.99	5.15	5.51	4.86	7.76
Am_HQ_1255	4717	AAA81472.1_metalloendopeptidase [Pisum sativum]	AT5G42390.1_Insulinase (Peptidase family M16) family protein, GeneName=SPP	IPR007863_Peptidase M16, C-terminal; IPR011765_Peptidase M16, N-terminal; IPR011249_Metalloenzyme, LuxS/M16 peptidase-like	3.91333	7.92333	3.14	1.68667	2.9	2.44	6.4	6.21	8.16	9.4	0	7.09	2.33	0	2.86	2.2
Am_HQ_1256	4673	XP_004489931.1_uncharacterized protein LOC101505283 isoform X2 [Cicer arietinum]	AT3G52250.1_Duplicated homeodomain-like superfamily protein	IPR017930_Myb domain; IPR009057_Homeobox-like domain superfamily; IPR001005_SANT/Myb domain	19.4167	11.95	12.9767	10.95	23.22	13.92	21.11	12.95	12.41	10.49	11.51	16.71	10.71	7.58	14.99	10.28
Am_HQ_1257	4698	XP_004495524.1_putative lysine-specific demethylase JMJ16 isoform X1 [Cicer arietinum] XP_012569947.1 putative lysine-specific demethylase JMJ16 isoform X1 [Cicer arietinum]	AT1G08620.3_Transcription factor jumonji (jmj) family protein / zinc finger (C5HC2 type) family protein, GeneName=PKDM7D	IPR003347_JmjC domain; IPR004198_Zinc finger, C5HC2-type; IPR003889_FY-rich, C-terminal; IPR003349_JmjN domain; IPR003888_FY-rich, N-terminal	6.04	15.82	16.0833	14.84	3.82	8.62	5.68	13.76	18.59	15.11	13.35	18.23	16.67	12.03	16.88	15.61
Am_HQ_1259	4676	XP_004494300.1_pre-mRNA-splicing factor prp12 isoform X1 [Cicer arietinum]	AT3G11960.3_Cleavage and polyadenylation specificity factor (CPSF) A subunit protein	IPR004871_Cleavage/polyadenylation specificity factor, A subunit, C-terminal; IPR018846_Cleavage/polyadenylation specificity factor, A subunit, N-terminal	12.4867	21.0267	19.61	24.55	9.19	16.52	11.75	18.81	23.09	21.18	13.61	22.09	23.13	20.77	24.43	28.45
Am_HQ_1260	4715	XP_027330849.1_clathrin heavy chain 2 [Abrus precatorius]	AT3G08530.1_Clathrin, heavy chain	IPR000547_Clathrin, heavy chain/VPS, 7-fold repeat; IPR016024_Armadillo-type fold	4.18	5.44	3.88333	2.55667	2.77	5.66	4.11	3.47	5.93	6.92	3.25	4.14	4.26	5.36	1.97	0.34
Am_HQ_1261	4713	XP_045805325.1_U-box domain-containing protein 44-like [Trifolium pratense]	AT4G14615.1_sporulation-specific protein	IPR003613_U-box domain; IPR016024_Armadillo-type fold; IPR000225_Armadillo	12.2133	25.0267	15.56	28.2767	15.07	16.03	5.54	23.6	27.38	24.1	20.04	13.26	13.38	35.83	21.79	27.21
Am_HQ_1263	4654	XP_003609372.2_WD repeat-containing protein 11 isoform X1 [Medicago truncatula] AES91569.2 transducin family protein/WD-40 repeat protein [Medicago truncatula]	AT3G33530.4_Transducin family protein / WD-40 repeat family protein	IPR036322_WD40-repeat-containing domain superfamily; IPR011047_Quinoprotein alcohol dehydrogenase-like superfamily	15.37	12.63	14.77	19.3733	13.09	20.16	12.86	9.02	15.65	13.22	10.87	17.32	16.12	15.6	18.63	23.89
Am_HQ_1265	4729	KYP76032.1_Retrovirus-related Pol polyprotein from transposon TNT 1-94 [Cajanus cajan]	AT4G23160.3_cysteine-rich RECEPTOR-like kinase, GeneName=CRK8	IPR001584_Integrase, catalytic core; IPR025724_GAG-pre-integrase domain; IPR012337_Ribonuclease H-like superfamily	14.4367	22.7	15.0167	19.8167	18.1	15.33	9.88	24.86	24.53	18.71	7.56	20.24	17.25	16.52	22.58	20.35
Am_HQ_1266	4711	PNX99559.1_endonuclease/exonuclease/phosphatase domain-containing protein, partial [Trifolium pratense]	AT4G30900.2_DNAse I-like superfamily protein	IPR036691_Endonuclease/exonuclease/phosphatase superfamily	0.38	2.52333	1.85	1.45	0.18	0.64	0.32	2.28	2.61	2.68	1.18	2.28	2.09	0.97	1.99	1.39
Am_HQ_1267	4713	XP_004516106.1_TMV resistance protein N-like isoform X1 [Cicer arietinum] XP_004516107.1 TMV resistance protein N-like isoform X1 [Cicer arietinum] XP_012567488.1 TMV resistance protein N-like isoform X1 [Cicer arietinum]	AT5G17680.2_disease resistance protein (TIR-NBS-LRR class)	IPR000157_Toll/interleukin-1 receptor homology (TIR) domain; IPR002182_NB-ARC; IPR011713_Leucine-rich repeat 3; IPR035897_Toll/interleukin-1 receptor homology (TIR) domain superfamily; IPR027417_P-loop containing nucleoside triphosphate hydrolase	20.0167	8.09333	1.59667	6.7	1.13	21.39	37.53	18.77	1.58	3.93	0.52	2.2	2.07	13.23	1.75	5.12
Am_HQ_1270	4709	GAU37771.1_hypothetical protein TSUD_102880 [Trifolium subterraneum]	AT4G29090.1_Ribonuclease H-like superfamily protein	IPR026960_Reverse transcriptase zinc-binding domain	0.753333	3.35333	1.70667	1.76333	1.12	0.56	0.58	2.15	4.49	3.42	0.1	2.07	2.95	1.24	2.26	1.79
Am_HQ_1271	4683	XP_006605163.2_LOW QUALITY PROTEIN: uncharacterized protein LOC100811087 [Glycine max]	.	IPR000477_Reverse transcriptase domain; IPR043502_DNA/RNA polymerase superfamily	1.45	5.03	2.13	1.85667	0.78	0.51	3.06	5	6.46	3.63	1.41	3.43	1.55	1.88	2.73	0.96
Am_HQ_1272	4708	XP_045815434.1_callose synthase 9 [Trifolium pratense] XP_045815440.1 callose synthase 9 [Trifolium pratense]	AT3G07160.1_glucan synthase-like 10, GeneName=GSL10	IPR003440_Glycosyl transferase, family 48; IPR026899_1,3-beta-glucan synthase subunit FKS1-like, domain-1	2.99667	1.41667	1.33333	1.16333	2.41	2.22	4.36	1.35	1.87	1.03	1.13	1.47	1.4	0.55	1.34	1.6
Am_HQ_1279	4637	KAH1263778.1_Fimbrin-1 [Glycine max]	AT4G26700.7_fimbrin 1, GeneName=FIM1	.	0.586667	3.13	3.25667	1.71667	0.28	0.86	0.62	3.8	4.25	1.34	1.57	3.71	4.49	1.46	1.8	1.89
Am_HQ_1281	4706	XP_045815382.1_RNA-binding protein 25 isoform X2 [Trifolium pratense] XP_045815383.1 RNA-binding protein 25 isoform X2 [Trifolium pratense]	AT1G60200.2_splicing factor PWI domain-containing protein / RNA recognition motif (RRM)-containing protein	IPR036483_PWI domain superfamily; IPR002483_PWI domain	1.87667	1.38333	0.556667	2.16333	2.19	2.09	1.35	1.11	1.98	1.06	0	0.78	0.89	1.32	2.63	2.54
Am_HQ_1284	4702	KZV25004.1_Cysteine-rich RLK (receptor-like protein kinase) 8 [Dorcoceras hygrometricum]	AT4G23160.3_cysteine-rich RECEPTOR-like kinase, GeneName=CRK8	IPR012337_Ribonuclease H-like superfamily; IPR043502_DNA/RNA polymerase superfamily; IPR001584_Integrase, catalytic core; IPR005162_Retrotransposon gag domain; IPR029472_Retrotransposon Copia-like, N-terminal; IPR025724_GAG-pre-integrase domain; IPR013103_Reverse transcriptase, RNA-dependent DNA polymerase	0.88	2.42	2.69	2.66	1.55	0.97	0.12	3.47	3.79	0	5.19	2.88	0	4.5	3.48	0
Am_HQ_1285	4578	KEH32482.1_plant/F27B13-30 protein [Medicago truncatula]	AT4G29790.1_serine/arginine repetitive matrix protein	.	23.12	17.29	15.17	18.7333	16.24	37.19	15.93	15.88	19.77	16.22	11.06	16.69	17.76	17.01	19.64	19.55
Am_HQ_1288	4675	XP_004486484.1_A-kinase anchor protein 9 isoform X4 [Cicer arietinum]	AT2G34780.2_maternal effect embryo arrest 22, GeneName=MEE22	.	4.24	4.63333	5.22667	8.11333	4.15	5.74	2.83	3.88	5.71	4.31	4.15	5.21	6.32	7.25	7.05	10.04
Am_HQ_1290	4701	TKY63924.1_TRM32 protein [Spatholobus suberectus]	AT4G00440.1_GPI-anchored adhesin-like protein, putative (DUF3741), GeneName=TRM15	IPR025486_Domain of unknown function DUF4378; IPR022212_Domain of unknown function DUF3741	11.2767	4.96	11.0067	7.59333	7.66	10.7	15.47	2.69	7.18	5.01	10.34	12.67	10.01	4.19	9.39	9.2
Am_HQ_1293	4694	XP_004486707.1_pleiotropic drug resistance protein 1-like [Cicer arietinum]	AT1G15520.1_pleiotropic drug resistance 12, GeneName=ABCG40	IPR003593_AAA+ ATPase domain; IPR013525_ABC-2 type transporter; IPR027417_P-loop containing nucleoside triphosphate hydrolase; IPR043926_ABC transporter family G domain; IPR003439_ABC transporter-like, ATP-binding domain; IPR013581_Plant PDR ABC transporter associated	0.203333	1.72667	5.54667	1.80333	0	0.57	0.04	0.37	3.49	1.32	1.69	5.43	9.52	0.93	1.64	2.84
Am_HQ_1295	4675	AES72013.2_cytokinin receptor histidine kinase [Medicago truncatula]	AT1G27320.1_histidine kinase 3, GeneName=HK3	IPR003594_Histidine kinase/HSP90-like ATPase; IPR006189_CHASE domain; IPR036097_Signal transduction histidine kinase, dimerisation/phosphoacceptor domain superfamily; IPR003661_Signal transduction histidine kinase, dimerisation/phosphoacceptor domain; IPR001789_Signal transduction response regulator, receiver domain; IPR004358_Signal transduction histidine kinase-related protein, C-terminal; IPR0…	65.97	69.9767	108.023	75.8767	47.51	86.03	64.37	83.97	63.87	62.09	74.37	130.6	119.1	83.7	80.42	63.51
Am_HQ_1296	4697	KYP49028.1_hypothetical protein KK1_029231 [Cajanus cajan]	.	.	1.35333	5.16	3.02	4.81667	0.8	2.47	0.79	4.99	5.46	5.03	2.5	3.44	3.12	4.39	4.6	5.46
Am_HQ_1297	4695	XP_027365777.1_uncharacterized protein LOC113872432 isoform X1 [Abrus precatorius]	AT3G12590.1_hypothetical protein	.	10.4567	13.4733	9.73667	17.2967	10.84	11.34	9.19	11.63	14.53	14.26	8.4	9.8	11.01	16.39	16.95	18.55
Am_HQ_1301	4645	RDY07763.1_putative serine/threonine-protein kinase SIS8, partial [Mucuna pruriens]	AT1G79570.3_kinase superfamily with octicosapeptide/Phox/Bem1p domain-containing protein	IPR011009_Protein kinase-like domain superfamily	0	0	0	0	0	0	0	0	0	0	0	0	0	0	0	0
Am_HQ_1303	4692	XP_027187628.1_uncharacterized protein LOC101494533 [Cicer arietinum]	AT5G36930.3_Disease resistance protein (TIR-NBS-LRR class) family	IPR000157_Toll/interleukin-1 receptor homology (TIR) domain; IPR002182_NB-ARC; IPR035897_Toll/interleukin-1 receptor homology (TIR) domain superfamily; IPR027417_P-loop containing nucleoside triphosphate hydrolase	10.9567	13.99	7.90667	15.7767	14.24	10.67	7.96	9.36	20.68	11.93	4.02	9.2	10.5	9.69	22.69	14.95
Am_HQ_1305	4638	XP_004505464.1_ras-related protein Rab11D-like [Cicer arietinum]	AT1G06400.1_Ras-related small GTP-binding family protein, GeneName=ARA-2	IPR027417_P-loop containing nucleoside triphosphate hydrolase; IPR005225_Small GTP-binding protein domain; IPR001806_Small GTPase	18.6833	6.81333	3.68333	9.83	6.77	26.42	22.86	10.4	4.97	5.07	1.95	3.87	5.23	19.54	4.61	5.34
Am_HQ_1306	4596	XP_004507762.1_autophagy-related protein 11 [Cicer arietinum]	AT4G30790.1_autophagy-like protein	IPR019460_Autophagy-related protein 11, C-terminal; IPR045326_Autophagy protein ATG17-like domain; IPR029071_Ubiquitin-like domain superfamily	11.0867	12.7933	20.7033	13.0133	7.2	14.93	11.13	10.72	14.21	13.45	12.9	24.72	24.49	10.74	16.37	11.93
Am_HQ_1309	4690	TKY62175.1_Pentatricopeptide repeat-containing protein mitochondrial [Spatholobus suberectus]	AT3G53360.1_Tetratricopeptide repeat (TPR)-like superfamily protein	IPR002885_Pentatricopeptide repeat	0.0666667	0.423333	0.48	1.55	0	0.18	0.02	0.18	0.48	0.61	0.31	0.46	0.67	0.81	1.46	2.38
Am_HQ_1311	4560	XP_004501461.1_protein IQ-DOMAIN 1 isoform X2 [Cicer arietinum]	AT3G16830.1_TOPLESS-related 2, GeneName=TPR2	.	22.2433	45.8	15.2267	30.53	33.69	23.34	9.7	49.75	47.21	40.44	9.07	20.14	16.47	29.98	34.2	27.41
Am_HQ_1314	4704	XP_045801558.1_paired amphipathic helix protein Sin3-like 4 isoform X5 [Trifolium pratense] XP_045801559.1 paired amphipathic helix protein Sin3-like 4 isoform X5 [Trifolium pratense]	AT1G70060.1_SIN3-like 4, GeneName=SNL4	IPR013194_Histone deacetylase interacting domain; IPR031693_Sin3, C-terminal	4.53333	6.63333	5.94667	4.69333	3.61	5.39	4.6	7.11	4.17	8.62	4.23	5.9	7.71	5.75	3.89	4.44
Am_HQ_1318	4684	XP_004502920.1_zinc finger CCCH domain-containing protein 38-like [Cicer arietinum] XP_012571935.1 zinc finger CCCH domain-containing protein 38-like [Cicer arietinum] XP_012571936.1 zinc finger CCCH domain-containing protein 38-like [Cicer arietinum] XP_027190231.1 zinc finger CCCH domain-containing protein 38-like [Cicer arietinum]	AT3G18640.1_Zinc finger C-x8-C-x5-C-x3-H type family protein	IPR000571_Zinc finger, CCCH-type; IPR036855_Zinc finger, CCCH-type superfamily	1.76333	3.12667	0.993333	2.94333	0.24	3.75	1.3	2.29	4.07	3.02	0.39	1.22	1.37	3.38	3.34	2.11
Am_HQ_1319	4602	XP_004486471.1_endoribonuclease Dicer homolog 2 isoform X1 [Cicer arietinum]	AT3G03300.4_dicer-like 2, GeneName=DCL2	IPR036085_PAZ domain superfamily; IPR036389_Ribonuclease III, endonuclease domain superfamily; IPR000999_Ribonuclease III domain; IPR003100_PAZ domain	6.63333	4.46	6.89	13.2333	11.66	1.32	6.92	6.46	0.86	6.06	11.64	1.02	8.01	18.31	2.56	18.83
Am_HQ_1320	4597	XP_020214547.1_cellulose synthase A catalytic subunit 3 [UDP-forming] [Cajanus cajan] XP_020214548.1 cellulose synthase A catalytic subunit 3 [UDP-forming] [Cajanus cajan]	AT5G05170.1_Cellulose synthase family protein, GeneName=CEV1	IPR005150_Cellulose synthase; IPR029044_Nucleotide-diphospho-sugar transferases	1.31	4.76	3.32	8.71667	0.54	2.03	1.36	5.79	4.58	3.91	1.5	4.02	4.44	6.3	9.44	10.41
Am_HQ_1321	4665	XP_004493407.1_ferredoxin-dependent glutamate synthase, chloroplastic [Cicer arietinum]	AT5G04140.1_glutamate synthase 1, GeneName=GLU1	IPR017932_Glutamine amidotransferase type 2 domain; IPR029055_Nucleophile aminohydrolases, N-terminal; IPR002932_Glutamate synthase domain; IPR006982_Glutamate synthase, central-N	0.0833333	1.65	0.533333	0.606667	0.12	0.13	0	1.21	1.47	2.27	0.18	0.84	0.58	0.61	0.62	0.59
Am_HQ_1328	4679	KAF7811206.1_chromatin remodeling protein EBS [Senna tora]	AT4G22140.2_PHD finger family protein / bromo-adjacent homology (BAH) domain-containing protein, GeneName=EBS	IPR001025_Bromo adjacent homology (BAH) domain; IPR011011_Zinc finger, FYVE/PHD-type	2.58333	3.23667	3.05	5.12667	3.58	2.04	2.13	2.34	2.93	4.44	2.33	2.62	4.2	3.03	4.2	8.15
Am_HQ_1330	4678	PWA34830.1_RNA-directed DNA polymerase, eukaryota, Reverse transcriptase zinc-binding domain protein [Artemisia annua]	.	.	1.5	3.59667	0.45	3.57	1.71	1.75	1.04	3.14	4.09	3.56	0.32	0.65	0.38	2.23	5.14	3.34
Am_HQ_1334	4660	XP_027340614.1_phosphatidylinositol 4-kinase beta 1-like [Abrus precatorius]	AT5G64070.1_phosphatidylinositol 4-OH kinase beta1, GeneName=PI-4KBETA1	IPR000403_Phosphatidylinositol 3-/4-kinase, catalytic domain; IPR011009_Protein kinase-like domain superfamily; IPR016024_Armadillo-type fold	19.79	22.1167	16.1367	20.23	26.03	18.88	14.46	21.92	25.25	19.18	12.76	18.67	16.98	18.69	20.83	21.17
Am_HQ_1335	4677	PNY06519.1_NBS-LRR resistance protein [Trifolium pratense]	AT3G14470.1_NB-ARC domain-containing disease resistance protein	IPR041118_Rx, N-terminal; IPR002182_NB-ARC; IPR027417_P-loop containing nucleoside triphosphate hydrolase	0.65	0.343333	0.873333	1.69667	0.63	0.42	0.9	0	0.68	0.35	0.13	1.21	1.28	0.14	3.03	1.92
Am_HQ_1339	4546	XP_027190509.1_enhancer of mRNA-decapping protein 4 [Cicer arietinum]	AT3G13300.1_Transducin/WD40 repeat-like superfamily protein, GeneName=VCS	IPR036322_WD40-repeat-containing domain superfamily; IPR032401_Enhancer of mRNA-decapping protein 4, WD40 repeat region; IPR001680_WD40 repeat	29.9233	28.61	28.7733	31.5267	47.98	20.26	21.53	28.08	32.78	24.97	21.63	32.87	31.82	26.8	30.54	37.24
Am_HQ_1340	4648	KHN21230.1_Retrovirus-related Pol polyprotein from transposon TNT 1-94, partial [Glycine soja]	AT4G23160.3_cysteine-rich RECEPTOR-like kinase, GeneName=CRK8	IPR012337_Ribonuclease H-like superfamily; IPR025724_GAG-pre-integrase domain; IPR013103_Reverse transcriptase, RNA-dependent DNA polymerase; IPR043502_DNA/RNA polymerase superfamily; IPR001584_Integrase, catalytic core	23.6933	41.4767	23.0367	25.6833	34.56	20.5	16.02	54.73	34.39	35.31	27.9	21.7	19.51	36.83	18.85	21.37
Am_HQ_1343	4675	XP_012569611.1_paladin-like isoform X1 [Cicer arietinum]	AT3G62010.1_metal ion-binding protein	IPR029021_Protein-tyrosine phosphatase-like	7.84	27.3733	14.18	21.4767	4.62	10.51	8.39	24.96	29.56	27.6	9.48	16.16	16.9	18.7	24.29	21.44
Am_HQ_1347	4661	.	.	.	9.17	7.07	5.90667	5.51333	9.78	11.09	6.64	5.33	7.59	8.29	2.71	7.82	7.19	8.66	3.05	4.83
Am_HQ_1349	4571	XP_027353706.1_E3 ubiquitin-protein ligase RKP isoform X1 [Abrus precatorius]	AT2G22010.2_related to KPC1, GeneName=RKP	IPR003877_SPRY domain; IPR013320_Concanavalin A-like lectin/glucanase domain superfamily; IPR045737_E3 ubiquitin-protein ligase RKP, N-terminal; IPR019474_Ubiquitin conjugation factor E4, core	8.38333	17.3767	14.67	11.7467	5.18	11.28	8.69	15	18.19	18.94	9.4	19.04	15.57	9.6	14.37	11.27
Am_HQ_1350	4660	GAU19960.1_hypothetical protein TSUD_95650 [Trifolium subterraneum]	AT3G19190.2_autophagy 2, GeneName=ATG2	.	1.12333	0.866667	0.71	0.763333	1.05	0.92	1.4	1.01	0.67	0.92	0.35	0.95	0.83	0.8	0.84	0.65
Am_HQ_1352	4696	XP_027352148.1_ABC transporter B family member 1 [Abrus precatorius]	AT2G36910.1_ATP binding cassette subfamily B1, GeneName=ABCB1	IPR036640_ABC transporter type 1, transmembrane domain superfamily; IPR003439_ABC transporter-like, ATP-binding domain; IPR027417_P-loop containing nucleoside triphosphate hydrolase; IPR011527_ABC transporter type 1, transmembrane domain	0.696667	8.33	14.4467	10.3033	0	1.63	0.46	0.18	9.76	15.05	0.45	14.85	28.04	0.12	7.45	23.34
Am_HQ_1353	4664	XP_045817618.1_DExH-box ATP-dependent RNA helicase DExH7, chloroplastic-like isoform X3 [Trifolium pratense] XP_045817981.1 DExH-box ATP-dependent RNA helicase DExH7, chloroplastic-like isoform X3 [Trifolium pratense]	AT1G58060.1_RNA helicase family protein	IPR014001_Helicase superfamily 1/2, ATP-binding domain; IPR001650_Helicase, C-terminal; IPR011545_DEAD/DEAH box helicase domain; IPR027417_P-loop containing nucleoside triphosphate hydrolase; IPR011709_Domain of unknown function DUF1605	7.42	2.9	5.32	4.97	6.83	5.17	10.26	2.59	4.79	1.32	3.67	6.82	5.47	4.81	5.17	4.93
Am_HQ_1354	4663	XP_004506749.1_symplekin isoform X1 [Cicer arietinum]	AT5G01400.3_HEAT repeat-containing protein, GeneName=ESP4	IPR016024_Armadillo-type fold; IPR022075_Symplekin C-terminal; IPR032460_Symplekin/Pta1, N-terminal	5.79	11.61	10.07	12.41	6.95	6	4.42	11.99	12.5	10.34	7.26	11.52	11.43	8.96	13.36	14.91
Am_HQ_1355	4652	XP_045830146.1_pleiotropic drug resistance protein 1-like [Trifolium pratense]	AT1G15520.1_pleiotropic drug resistance 12, GeneName=ABCG40	IPR029481_ABC-transporter, N-terminal domain; IPR003439_ABC transporter-like, ATP-binding domain; IPR027417_P-loop containing nucleoside triphosphate hydrolase; IPR013581_Plant PDR ABC transporter associated; IPR013525_ABC-2 type transporter; IPR003593_AAA+ ATPase domain	0.03	4.60333	8.72667	1.49667	0.02	0.07	0	4.27	3.51	6.03	3.18	7.21	15.79	2.07	1.65	0.77
Am_HQ_1358	4639	RVX06074.1_Retrovirus-related Pol polyprotein from transposon TNT 1-94 [Vitis vinifera]	AT4G23160.3_cysteine-rich RECEPTOR-like kinase, GeneName=CRK8	IPR013103_Reverse transcriptase, RNA-dependent DNA polymerase; IPR043502_DNA/RNA polymerase superfamily	4.01	2.51333	1.81333	1.83667	4.65	3.03	4.35	2.52	3.07	1.95	1.24	2.37	1.83	1.71	2.17	1.63
Am_HQ_1359	4565	XP_027353647.1_splicing factor-like protein 1 [Abrus precatorius] XP_027353648.1 splicing factor-like protein 1 [Abrus precatorius]	AT5G51300.2_splicing factor-like protein	IPR000504_RNA recognition motif domain; IPR036875_Zinc finger, CCHC-type superfamily; IPR004088_K Homology domain, type 1; IPR035979_RNA-binding domain superfamily; IPR004087_K Homology domain; IPR036612_K Homology domain, type 1 superfamily; IPR032570_Splicing factor 1, helix-hairpin domain; IPR001878_Zinc finger, CCHC-type	5.25	10.0467	6.91667	10.29	4.46	8.29	3	15.09	7.5	7.55	1.95	8.51	10.29	13.41	7.24	10.22
Am_HQ_1362	4648	XP_012571322.1_probable serine/threonine-protein kinase WNK4 [Cicer arietinum]	AT3G51630.2_with no lysine (K) kinase 5, GeneName=WNK5	IPR002885_Pentatricopeptide repeat	0.206667	1.76	1.17667	1.73	0.36	0.26	0	1.32	2.49	1.47	1.13	1.34	1.06	0.92	1.96	2.31
Am_HQ_1365	4654	XP_012572816.1_protein WHAT&apos;S THIS FACTOR 9, mitochondrial [Cicer arietinum] XP_012572817.1 protein WHAT&apos;S THIS FACTOR 9, mitochondrial [Cicer arietinum]	AT4G24320.1_Ubiquitin carboxyl-terminal hydrolase family protein	IPR021099_Plant organelle RNA recognition domain	2.58333	5.76667	4.83333	7.42333	2.88	2.54	2.33	6.07	6.39	4.84	5.35	4.55	4.6	5.44	8.74	8.09
Am_HQ_1366	4650	RDY04144.1_Magnesium-chelatase subunit ChlH, chloroplastic, partial [Mucuna pruriens]	AT5G13630.1_magnesium-chelatase subunit chlH, chloroplast, putative / Mg-protoporphyrin IX chelatase, putative (CHLH), GeneName=GUN5	IPR011771_Magnesium-chelatase, subunit H; IPR003672_CobN/magnesium chelatase	0.37	208.11	92.3933	65.5267	0.59	0.19	0.33	188.65	214.04	221.64	54.96	101.33	120.89	61.06	57.57	77.95
Am_HQ_1367	4651	XP_004508576.1_transcription initiation factor TFIID subunit 2 isoform X2 [Cicer arietinum]	AT1G73960.1_TBP-associated factor 2, GeneName=TAF2	IPR014782_Peptidase M1, membrane alanine aminopeptidase; IPR042097_Aminopeptidase N-like , N-terminal domain superfamliy	4.49333	11.4433	7.48	8.95667	4.52	7.81	1.15	18.15	14.55	1.63	12.05	9.44	0.95	9.71	15.82	1.34
Am_HQ_1368	4659	TKY67470.1_Flowering time control protein FPA [Spatholobus suberectus]	AT2G43410.2_RNA binding protein, GeneName=FPA	IPR012921_Spen paralogue and orthologue SPOC, C-terminal	15.4067	6.49667	7.93	5.66333	24.43	7.01	14.78	4.98	7.81	6.7	7.24	8.87	7.68	5.05	6.31	5.63
Am_HQ_1370	4637	RDX71401.1_Small ubiquitin-related modifier 1, partial [Mucuna pruriens]	AT5G55160.1_small ubiquitin-like modifier 2, GeneName=SUMO2	.	1.09667	2.05667	1.05	1.41667	1.1	1.74	0.45	1.3	2.59	2.28	0.57	1.22	1.36	1.16	1.54	1.55
Am_HQ_1371	4635	XP_012573387.1_serine/threonine-protein phosphatase 4 regulatory subunit 3-like isoform X2 [Cicer arietinum]	AT3G06670.1_binding protein	IPR006887_Domain of unknown function DUF625	2.98	5.01667	2.43667	4.05	4.33	3.93	0.68	4.97	7.75	2.33	1.62	3.83	1.86	3.62	6.29	2.24
Am_HQ_1373	4582	PNX92266.1_retrotransposon-related protein [Trifolium pratense]	AT1G53850.2_20S proteasome alpha subunit E1, GeneName=PAE1	IPR023780_Chromo domain; IPR016197_Chromo-like domain superfamily; IPR012337_Ribonuclease H-like superfamily	4.22667	7.03	4.76	6.51667	7.81	2.9	1.97	5.68	9.31	6.1	2.66	6.07	5.55	6.37	5.86	7.32
Am_HQ_1374	4629	PNX64909.1_hypothetical protein L195_g054265 [Trifolium pratense] GAU19233.1 hypothetical protein TSUD_199150 [Trifolium subterraneum]	.	.	0.0233333	0.08	0.16	0.11	0.02	0.05	0	0.19	0.03	0.02	0.32	0.05	0.11	0.03	0.1	0.2
Am_HQ_1375	4629	XP_027345863.1_uncharacterized protein LOC113857830 [Abrus precatorius]	AT5G22450.2_spectrin beta chain, brain	.	7.84667	7.83333	6.44667	7.15	6.26	9.17	8.11	8.68	7.95	6.87	5.47	7.35	6.52	6.64	6.22	8.59
Am_HQ_1376	4675	XP_004508572.1_uncharacterized protein LOC101505485 [Cicer arietinum]	AT1G18470.2_Transmembrane Fragile-X-F-associated protein	IPR019396_Transmembrane Fragile-X-F-associated protein	0.913333	2.28	1.37333	1.78667	0.8	1.44	0.5	2.44	2.62	1.78	0.89	1.77	1.46	2.07	1.46	1.83
Am_HQ_1377	4622	XP_045826971.1_uncharacterized protein LOC123918852 isoform X4 [Trifolium pratense]	AT5G56930.1_CCCH-type zinc finger family protein, GeneName=EMB1789	IPR000571_Zinc finger, CCCH-type; IPR036855_Zinc finger, CCCH-type superfamily	11.9767	5.63	5.98333	6.94	13.08	8.71	14.14	3.39	6.28	7.22	7.63	5.03	5.29	6.98	9.41	4.43
Am_HQ_1378	4648	KYP40438.1_Putative ribonuclease H protein At1g65750 family, partial [Cajanus cajan]	ATMG01250.1_RNA-directed DNA polymerase (reverse transcriptase), GeneName=ORF102	IPR019557_Aminotransferase-like, plant mobile domain	0.333333	0.203333	16.2467	0.253333	0.34	0.57	0.09	0.23	0.27	0.11	6.07	22.86	19.81	0.41	0.21	0.14
Am_HQ_1379	4654	XP_027192082.1_uncharacterized protein LOC101511453 isoform X2 [Cicer arietinum]	AT4G39420.2_spatacsin carboxy-terminus protein	IPR028107_Spatacsin, C-terminal domain	33.08	16.4833	15.7733	16.7033	32.96	21.61	44.67	16.82	16.03	16.6	13.33	18.28	15.71	17.19	14.96	17.96
Am_HQ_1381	4647	XP_003590569.2_protein SPIRRIG [Medicago truncatula] AES60820.2 beige/BEACH and WD40 domain protein [Medicago truncatula] RHN80145.1 putative transcription factor WD40-like family [Medicago truncatula]	AT1G03060.1_BEACH-DOMAIN HOMOLOG A1, GeneName=SPI	IPR023362_PH-BEACH domain	72.7533	13.7733	20.69	22.19	111.53	37.36	69.37	11.8	14.96	14.56	20.61	21	20.46	21.21	20.34	25.02
Am_HQ_1383	4645	XP_004487920.1_pentatricopeptide repeat-containing protein At5g55840-like [Cicer arietinum] XP_004487921.1 pentatricopeptide repeat-containing protein At5g55840-like [Cicer arietinum] XP_012573757.1 pentatricopeptide repeat-containing protein At5g55840-like [Cicer arietinum]	AT5G55840.3_PPR superfamily protein	IPR002885_Pentatricopeptide repeat	1	2.71667	1.68333	3.23	1.23	1.14	0.63	2.65	3.22	2.28	1.29	1.9	1.86	2.84	3.7	3.15
Am_HQ_1384	4650	XP_004501753.1_protein MEI2-like 1 [Cicer arietinum]	AT5G61960.1_MEI2-like protein 1, GeneName=ML1	IPR000504_RNA recognition motif domain; IPR035979_RNA-binding domain superfamily; IPR007201_Mei2-like, C-terminal RNA recognition motif	3.43333	1.01	1.63333	0.656667	8.42	0.71	1.17	0.71	1.43	0.89	0.16	2.66	2.08	0.42	0.87	0.68
Am_HQ_1385	4628	XP_004499912.1_DNA topoisomerase 2 [Cicer arietinum] XP_004517303.1 DNA topoisomerase 2 [Cicer arietinum]	AT3G23890.2_topoisomerase II, GeneName=TOPII	IPR013760_DNA topoisomerase, type IIA-like domain superfamily; IPR002205_DNA topoisomerase, type IIA, domain A; IPR001154_DNA topoisomerase II, eukaryotic-type	8.41667	9.91	8.65333	8.42333	5.41	12.97	6.87	4.52	17.36	7.85	2.93	14.27	8.76	3	14.52	7.75
Am_HQ_1387	4645	XP_045814380.1_disease resistance protein RUN1-like [Trifolium pratense] XP_045814381.1 disease resistance protein RUN1-like [Trifolium pratense]	AT5G17680.1_disease resistance protein (TIR-NBS-LRR class)	.	1.50333	2.34	0.316667	5.52	0.86	2.08	1.57	4.15	1.12	1.75	0.27	0.28	0.4	10.5	3.56	2.5
Am_HQ_1389	4496	RDX69337.1_hypothetical protein CR513_51561, partial [Mucuna pruriens]	AT4G29790.1_serine/arginine repetitive matrix protein	.	20.51	14.2833	13.3667	13.3067	19.46	24.83	17.24	15.52	14.09	13.24	9.31	15.45	15.34	11.6	13.19	15.13
Am_HQ_1390	4610	XP_029129176.1_probable serine/threonine-protein kinase drkD [Cajanus cajan]	AT1G79570.1_kinase superfamily with octicosapeptide/Phox/Bem1p domain-containing protein	IPR000719_Protein kinase domain; IPR000270_PB1 domain; IPR001245_Serine-threonine/tyrosine-protein kinase, catalytic domain; IPR011009_Protein kinase-like domain superfamily	2.57667	10.81	5.61667	2.58333	1.01	5.69	1.03	9.53	10.95	11.95	5.33	8.15	3.37	0.07	3.54	4.14
Am_HQ_1392	4642	TKY57102.1_hypothetical protein E2542_SST21548 [Spatholobus suberectus]	AT2G26920.1_Ubiquitin-associated/translation elongation factor EF1B protein	IPR015940_Ubiquitin-associated domain; IPR009060_UBA-like superfamily	12.79	13.45	16.0233	13.7367	17.97	9.79	10.61	12.4	14.41	13.54	15.32	15.65	17.1	11.59	15.36	14.26
Am_HQ_1394	4540	RHN69276.1_putative RNA-directed DNA polymerase [Medicago truncatula]	AT4G23160.3_cysteine-rich RECEPTOR-like kinase, GeneName=CRK8	IPR013103_Reverse transcriptase, RNA-dependent DNA polymerase; IPR043502_DNA/RNA polymerase superfamily	0.81	3.19333	1.35333	3.55333	0.31	2.12	0	3.27	3.13	3.18	1.84	1.79	0.43	2.03	3.93	4.7
Am_HQ_1397	4595	XP_027352148.1_ABC transporter B family member 1 [Abrus precatorius]	AT2G36910.1_ATP binding cassette subfamily B1, GeneName=ABCB1	IPR036640_ABC transporter type 1, transmembrane domain superfamily; IPR003593_AAA+ ATPase domain; IPR003439_ABC transporter-like, ATP-binding domain; IPR027417_P-loop containing nucleoside triphosphate hydrolase; IPR011527_ABC transporter type 1, transmembrane domain	4.53333	24.0667	47.8133	37.4067	7.1	6.1	0.4	21.21	34.76	16.23	59.79	51.24	32.41	56.49	28.5	27.23
Am_HQ_1398	4619	XP_045824462.1_ABC transporter C family member 12-like [Trifolium pratense]	AT2G34660.2_multidrug resistance-associated protein 2, GeneName=ABCC2	IPR036640_ABC transporter type 1, transmembrane domain superfamily; IPR003439_ABC transporter-like, ATP-binding domain; IPR027417_P-loop containing nucleoside triphosphate hydrolase; IPR011527_ABC transporter type 1, transmembrane domain; IPR003593_AAA+ ATPase domain	0.293333	2.64333	0.69	1.27333	0.06	0.78	0.04	0.09	5.85	1.99	0	1.06	1.01	0.07	2.19	1.56
Am_HQ_1399	4633	GAU35356.1_hypothetical protein TSUD_337480 [Trifolium subterraneum]	AT1G07670.1_endomembrane-type CA-ATPase 4, GeneName=ECA4	IPR008250_P-type ATPase, A domain superfamily; IPR023298_P-type ATPase, transmembrane domain superfamily; IPR001757_P-type ATPase; IPR023299_P-type ATPase, cytoplasmic domain N	7.83333	13.23	12.5333	14.8033	4.42	9.91	9.17	15.93	13.43	10.33	12.96	15.38	9.26	18.58	13.27	12.56
Am_HQ_1401	4624	BAG72151.1_hypothetical protein [Lotus japonicus]	ATMG00860.1_DNA/RNA polymerases superfamily protein, GeneName=ORF158	IPR041588_Integrase zinc-binding domain; IPR041373_Reverse transcriptase, RNase H-like domain; IPR043502_DNA/RNA polymerase superfamily; IPR012337_Ribonuclease H-like superfamily	0.81	4.15	7.65	6.74667	0.54	1.16	0.73	3.54	4.54	4.37	7.36	8.9	6.69	4.5	8.36	7.38
Am_HQ_1402	4614	XP_034241748.1_protein groucho-like isoform X4 [Thrips palmi]	.	IPR009146_Groucho/transducin-like enhancer; IPR005617_Groucho/TLE, N-terminal Q-rich domain; IPR001680_WD40 repeat; IPR036322_WD40-repeat-containing domain superfamily	0	0.05	1.43	0	0	0	0	0	0.05	0.1	3.36	0.52	0.41	0	0	0
Am_HQ_1403	4559	XP_027338543.1_trihelix transcription factor ASIL2-like [Abrus precatorius]	AT3G58630.2_sequence-specific DNA binding transcription factor	IPR044822_Myb/SANT-like DNA-binding domain 4	1.54333	1.23333	1.97667	1.18667	0.97	1.71	1.95	1.43	1.18	1.09	1.51	2.44	1.98	1.14	1.09	1.33
Am_HQ_1404	4620	XP_004491380.1_uncharacterized protein LOC101497686 [Cicer arietinum]	.	IPR006642_Rad18, zinc finger UBZ4-type	12.9167	6.66	8.97667	6.77333	10.71	9.77	18.27	6.97	7.52	5.49	6.35	11.26	9.32	7.1	6.32	6.9
Am_HQ_1406	4617	XP_027330849.1_clathrin heavy chain 2 [Abrus precatorius]	AT3G08530.1_Clathrin, heavy chain	IPR016341_Clathrin, heavy chain; IPR016024_Armadillo-type fold; IPR000547_Clathrin, heavy chain/VPS, 7-fold repeat	14.8467	16.6067	17.14	13.9	14.69	21.02	8.83	8.84	23.71	17.27	4.37	24.22	22.83	8.62	17.96	15.12
Am_HQ_1407	4624	PNY10806.1_histone deacetylase [Trifolium pratense]	AT4G23160.3_cysteine-rich RECEPTOR-like kinase, GeneName=CRK8	.	3.83333	3.28333	3.56	4.57667	2.96	8.54	0	2.66	7.19	0	2.43	8.25	0	4.98	8.75	0
Am_HQ_1409	4585	TKY53009.1_sporulation-specific protein 15 [Spatholobus suberectus]	AT1G22060.1_sporulation-specific protein	.	0.0633333	1.85333	0.68	1.85333	0.05	0.12	0.02	2.05	1.69	1.82	0.61	0.55	0.88	2.55	1.83	1.18
Am_HQ_1411	4631	XP_027187629.1_LOW QUALITY PROTEIN: uncharacterized protein LOC101512894 [Cicer arietinum]	AT5G36930.3_Disease resistance protein (TIR-NBS-LRR class) family	IPR036163_Heavy metal-associated domain superfamily; IPR002182_NB-ARC; IPR035897_Toll/interleukin-1 receptor homology (TIR) domain superfamily; IPR000157_Toll/interleukin-1 receptor homology (TIR) domain; IPR036390_Winged helix DNA-binding domain sup	7.10333	13.72	8.5	13.4467	9.14	6.91	5.26	14.67	15.23	11.26	5.53	9.64	10.33	11.63	14.45	14.26
Am_HQ_1412	4635	.	.	.	7.34333	2.00333	8.43	1.54	9.75	4.52	7.76	1.75	1.61	2.65	4.48	11.52	9.29	1.32	1.66	1.64
Am_HQ_1413	4647	XP_024638091.1_chromatin structure-remodeling complex protein SYD isoform X3 [Medicago truncatula]	.	.	36.0267	46.43	31.6967	37.85	36.78	38.03	33.27	40.01	51.3	47.98	21.84	37.46	35.79	24.3	45.33	43.92
Am_HQ_1414	4584	KAE9588534.1_putative transcription factor C2H2 family [Lupinus albus]	AT1G12470.1_zinc ion binding protein	IPR000547_Clathrin, heavy chain/VPS, 7-fold repeat; IPR007810_Pep3/Vps18/deep orange	3.48333	0.776667	0.47	0.69	3.83	2.23	4.39	1.13	0.42	0.78	0.49	0.22	0.7	0.45	0.22	1.4
Am_HQ_1419	4597	XP_004502920.1_zinc finger CCCH domain-containing protein 38-like [Cicer arietinum] XP_012571935.1 zinc finger CCCH domain-containing protein 38-like [Cicer arietinum] XP_012571936.1 zinc finger CCCH domain-containing protein 38-like [Cicer arietinum] XP_027190231.1 zinc finger CCCH domain-containing protein 38-like [Cicer arietinum]	AT3G18640.1_Zinc finger C-x8-C-x5-C-x3-H type family protein	IPR000571_Zinc finger, CCCH-type; IPR036855_Zinc finger, CCCH-type superfamily	8.46667	11.55	8.84333	11.7067	9.4	8.33	7.67	11.37	13.09	10.19	10.71	8.32	7.5	11.19	12.29	11.64
Am_HQ_1423	4518	XP_045787633.1_probable prefoldin subunit 3 [Trifolium pratense]	AT5G49510.1_prefoldin 3, GeneName=PFD3	.	0.99	2.79667	1.83	2.29333	0.74	1.96	0.27	2.74	3.46	2.19	1.01	2.47	2.01	1.4	2.58	2.9
Am_HQ_1424	4567	XP_004511873.1_suppressor of RPS4-RLD 1 isoform X1 [Cicer arietinum]	AT4G37460.2_Tetratricopeptide repeat (TPR)-like superfamily protein, GeneName=SRFR1	IPR011990_Tetratricopeptide-like helical domain superfamily; IPR001440_Tetratricopeptide repeat 1; IPR019734_Tetratricopeptide repeat	2.52667	4.91333	3.84	4.75333	1.86	3.48	2.24	5.1	5.29	4.35	0.93	5.11	5.48	4.16	5.01	5.09
Am_HQ_1428	4622	XP_004492742.1_small subunit processome component 20 homolog [Cicer arietinum]	AT5G14880.1_Potassium transporter family protein	.	1.39	2.36667	1.35	2.88667	1.13	2.33	0.71	3.51	0.98	2.61	0.64	2.01	1.4	4.1	2.52	2.04
Am_HQ_1430	4618	XP_045787641.1_cyclin-T1-3-like isoform X3 [Trifolium pratense]	AT4G19600.1_Cyclin family protein, GeneName=CYCT1;4	IPR006671_Cyclin, N-terminal; IPR036915_Cyclin-like superfamily; IPR013763_Cyclin-like	1.60667	1.16333	0.976667	0.523333	2.1	2.09	0.63	1.21	0.56	1.72	0.63	1.53	0.77	0	1.25	0.32
Am_HQ_1433	4394	GAU45617.1_hypothetical protein TSUD_301950 [Trifolium subterraneum]	AT1G52540.2_Protein kinase superfamily protein	IPR003690_Transcription termination factor, mitochondrial/chloroplastic	0.04	0.0233333	0	0.0933333	0.07	0	0.05	0.07	0	0	0	0	0	0.07	0	0.21
Am_HQ_1436	4626	XP_004493055.2_DNA ligase 6, partial [Cicer arietinum]	AT1G66730.1_DNA LIGASE 6, GeneName=LIG6	IPR012308_DNA ligase, ATP-dependent, N-terminal; IPR011084_DNA repair metallo-beta-lactamase; IPR000977_DNA ligase, ATP-dependent; IPR036599_DNA ligase, ATP-dependent, N-terminal domain superfamily; IPR012309_DNA ligase, ATP-dependent, C-terminal; IPR036866_Ribonuclease Z/Hydroxyacylglutathione hydrolase-like; IPR012310_DNA ligase, ATP-dependent, central; IPR012340_Nucleic acid-binding, OB-fold	3.83	6.98667	4.65333	7.47	5.69	3.21	2.59	7.21	7.06	6.69	3.33	5.29	5.34	5.93	7.57	8.91
Am_HQ_1437	4581	XP_012568173.1_uncharacterized protein LOC105851568 [Cicer arietinum]	.	.	10.3533	7.84667	1.39333	22.7833	22.97	8.03	0.06	5.94	17.58	0.02	0.99	3.07	0.12	24.16	44.16	0.03
Am_HQ_1438	4628	XP_004510535.1_protein PHYTOCHROME-DEPENDENT LATE-FLOWERING [Cicer arietinum]	AT1G72390.1_nuclear receptor coactivator	.	19.2733	16.35	14.42	18.0667	14.03	22.49	21.3	14.26	20.94	13.85	10.14	18.64	14.48	15.39	20.05	18.76
Am_HQ_1443	4604	MCH79374.1_hypothetical protein [Trifolium medium]	AT4G23160.3_cysteine-rich RECEPTOR-like kinase, GeneName=CRK8	IPR025558_Domain of unknown function DUF4283; IPR036875_Zinc finger, CCHC-type superfamily	1.70333	2.99333	1.87	1.15667	2.09	1.53	1.49	4.06	2.28	2.64	1.15	2.49	1.97	0.95	1.26	1.26
Am_HQ_1444	4606	MCH80704.1_retrovirus-related Pol polyprotein from transposon TNT 1-94 [Trifolium medium]	AT4G23160.3_cysteine-rich RECEPTOR-like kinase, GeneName=CRK8	IPR013103_Reverse transcriptase, RNA-dependent DNA polymerase; IPR043502_DNA/RNA polymerase superfamily	0.37	2.57333	3.72	3.5	0.19	0.78	0.14	1.62	3.84	2.26	3.63	4.6	2.93	2.75	3.26	4.49
Am_HQ_1445	4610	XP_004502930.1_phosphatidylinositol 4-kinase beta 1 isoform X1 [Cicer arietinum]	AT5G64070.1_phosphatidylinositol 4-OH kinase beta1, GeneName=PI-4KBETA1	IPR016024_Armadillo-type fold; IPR011009_Protein kinase-like domain superfamily; IPR000403_Phosphatidylinositol 3-/4-kinase, catalytic domain	0	0	0	0	0	0	0	0	0	0	0	0	0	0	0	0
Am_HQ_1446	4325	XP_004516713.1_uncharacterized protein LOC101499055 [Cicer arietinum]	AT1G52540.2_Protein kinase superfamily protein	.	0.103333	0.0666667	0.103333	0.0833333	0.22	0	0.09	0.06	0	0.14	0.18	0	0.13	0.14	0	0.11
Am_HQ_1448	4615	XP_004509684.1_kinesin-like protein KIN-14B isoform X2 [Cicer arietinum]	AT5G65460.4_kinesin like protein for actin based chloroplast movement 2, GeneName=KAC2	IPR001752_Kinesin motor domain; IPR027417_P-loop containing nucleoside triphosphate hydrolase	3.67667	38.5633	23.5633	12.7933	2.25	6.42	2.36	43.39	36.53	35.77	17.66	26.63	26.4	11.72	11.44	15.22
Am_HQ_1451	4614	RYR75746.1_hypothetical protein Ahy_A01g000329 isoform A [Arachis hypogaea]	AT1G73960.1_TBP-associated factor 2, GeneName=TAF2	IPR042097_Aminopeptidase N-like , N-terminal domain superfamliy; IPR014782_Peptidase M1, membrane alanine aminopeptidase	19.52	28.2	18.7033	22.41	15.86	13.69	29.01	21.62	22.2	40.78	15.59	15.01	25.51	17.51	16.78	32.94
Am_HQ_1453	4620	XP_003610160.4_uncharacterized protein LOC11441779 [Medicago truncatula] RHN64775.1 putative protein kinase TKL-Pl-6 family [Medicago truncatula]	AT5G57610.1_kinase superfamily with octicosapeptide/Phox/Bem1p domain-containing protein	IPR011009_Protein kinase-like domain superfamily; IPR000270_PB1 domain; IPR001245_Serine-threonine/tyrosine-protein kinase, catalytic domain; IPR000719_Protein kinase domain	5.7	58.8633	27.0133	32.04	3.1	10.15	3.85	75.48	48.19	52.92	16.03	31.35	33.66	35.23	28.84	32.05
Am_HQ_1454	4617	AES68918.1_disease resistance protein (CC-NBS-LRR class) family protein [Medicago truncatula]	AT3G14470.1_NB-ARC domain-containing disease resistance protein	IPR002182_NB-ARC; IPR041118_Rx, N-terminal; IPR027417_P-loop containing nucleoside triphosphate hydrolase	9.47667	11.2333	8.25667	8.93333	13.23	5.52	9.68	12.45	11.01	10.24	5	10.05	9.72	7.45	9.45	9.9
Am_HQ_1455	4613	XP_020238532.1_vesicle-associated protein 4-1 isoform X1 [Cajanus cajan]	AT4G21450.2_PapD-like superfamily protein	.	6.86667	1.13	0.963333	1.11	9.61	3.98	7.01	1.1	1.35	0.94	0.64	1.15	1.1	0.95	1.31	1.07
Am_HQ_1456	4605	XP_027192861.1_zinc finger BED domain-containing protein DAYSLEEPER isoform X1 [Cicer arietinum]	AT3G42170.1_BED zinc finger and hAT dimerization domain-containing protein DAYSLEEPER, GeneName=DAYSLEEPER	IPR036236_Zinc finger C2H2 superfamily	6.23	4.66667	3.42667	3.7	11.75	6.57	0.37	6.52	6.56	0.92	3.18	6.1	1	4.55	5.71	0.84
Am_HQ_1458	4408	TKY61136.1_Exportin-T protein [Spatholobus suberectus]	AT1G72560.1_ARM repeat superfamily protein, GeneName=PSD	.	0	0	0.00666667	0	0	0	0	0	0	0	0	0	0.02	0	0	0
Am_HQ_1460	4594	XP_027345912.1_DNA-directed RNA polymerase III subunit 1 [Abrus precatorius]	AT5G60040.1_nuclear RNA polymerase C1, GeneName=NRPC1	IPR007080_RNA polymerase Rpb1, domain 1; IPR007083_RNA polymerase Rpb1, domain 4; IPR007081_RNA polymerase Rpb1, domain 5; IPR006592_RNA polymerase, N-terminal; IPR000722_RNA polymerase, alpha subunit; IPR007066_RNA polymerase Rpb1, domain 3	6.67333	8.65667	6.33	4.65	5.14	4.89	9.99	6.51	8.87	10.59	5	6.63	7.36	3.53	4.23	6.19
Am_HQ_1461	4601	XP_012571699.1_26S proteasome non-ATPase regulatory subunit 11 homolog [Cicer arietinum]	AT1G29150.1_non-ATPase subunit 9, GeneName=ATS9	IPR000717_Proteasome component (PCI) domain; IPR036390_Winged helix DNA-binding domain superfamily; IPR040780_6S proteasome subunit Rpn6, C-terminal helix domain; IPR040773_26S proteasome regulatory subunit Rpn6, N-terminal; IPR011990_Tetratricopeptide-like helical domain superfamily	1.28667	1.39333	1.09333	1.52667	1.5	1.25	1.11	1.24	1.56	1.38	0.46	1.44	1.38	1.56	1.63	1.39
Am_HQ_1463	4603	XP_045814319.1_regulator of nonsense transcripts 1 homolog [Trifolium pratense]	AT5G47010.1_RNA helicase, GeneName=LBA1	IPR041677_DNA2/NAM7 helicase, helicase domain; IPR027417_P-loop containing nucleoside triphosphate hydrolase; IPR041679_DNA2/NAM7 helicase-like, C-terminal	2.41	1.22667	1.51667	1.05	3.46	1.23	2.54	0.71	1.75	1.22	0.9	2.96	0.69	0.48	1.29	1.38
Am_HQ_1464	4641	KAG4945910.1_hypothetical protein JHK87_041917 [Glycine soja]	AT1G64570.1_Homeodomain-like superfamily protein, GeneName=DUO3	.	2.35	4.35	5.62333	6.02333	2.16	3.11	1.78	4.05	5.21	3.79	5.42	5.79	5.66	4.72	6.06	7.29
Am_HQ_1465	4559	XP_027345863.1_uncharacterized protein LOC113857830 [Abrus precatorius]	AT5G22450.2_spectrin beta chain, brain	.	2.86667	2.93333	2.64333	2.41667	2.04	3.3	3.26	3.08	2.92	2.8	1.53	2.52	3.88	2.51	2.1	2.64
Am_HQ_1467	4569	RYR75746.1_hypothetical protein Ahy_A01g000329 isoform A [Arachis hypogaea]	AT1G73960.1_TBP-associated factor 2, GeneName=TAF2	IPR042097_Aminopeptidase N-like , N-terminal domain superfamliy; IPR014782_Peptidase M1, membrane alanine aminopeptidase	6.39	3.43	2.43667	2.49333	14.3	4.87	0	2	8.29	0	2.24	5.07	0	7.4	0.08	0
Am_HQ_1469	4613	GAU10800.1_hypothetical protein TSUD_425270, partial [Trifolium subterraneum]	AT5G14390.1_alpha/beta-Hydrolases superfamily protein	IPR005162_Retrotransposon gag domain	16.5733	17.5167	11.3067	13.4433	26.25	13.83	9.64	16.28	20.54	15.73	6.42	15.09	12.41	8.9	18.22	13.21
Am_HQ_1470	4602	GAU10800.1_hypothetical protein TSUD_425270, partial [Trifolium subterraneum]	.	.	0.55	0.373333	0	2.11667	0	0.94	0.71	0.84	0.28	0	0	0	0	5.22	0	1.13
Am_HQ_1475	4594	XP_009534206.1_hypothetical protein PHYSODRAFT_288363 [Phytophthora sojae] XP_009539729.1 hypothetical protein PHYSODRAFT_292668 [Phytophthora sojae] EGZ04887.1 hypothetical protein PHYSODRAFT_292668 [Phytophthora sojae] EGZ11461.1 hypothetical protein PHYSODRAFT_288363 [Phytophthora sojae]	.	.	2.85333	0	0	0	1.34	3.5	3.72	0	0	0	0	0	0	0	0	0
Am_HQ_1477	4597	XP_003607932.2_E3 ubiquitin-protein ligase MBR2 [Medicago truncatula] RHN62176.1 putative transcription factor C2H2 family [Medicago truncatula]	AT4G34040.1_RING/U-box superfamily protein, GeneName=MBR2	IPR001841_Zinc finger, RING-type	0.676667	2.22	2.83	1.81667	0.23	1.13	0.67	1.98	2.67	2.01	0.88	4.01	3.6	1.38	1.99	2.08
Am_HQ_1481	4593	XP_003599114.1_putative disease resistance RPP13-like protein 1 [Medicago truncatula] XP_039687188.1 putative disease resistance RPP13-like protein 1 [Medicago truncatula] AES69365.1 LRR and NB-ARC domain disease resistance protein [Medicago truncatula]	AT3G14470.1_NB-ARC domain-containing disease resistance protein	IPR027417_P-loop containing nucleoside triphosphate hydrolase; IPR002182_NB-ARC; IPR041118_Rx, N-terminal	2.82	2.03333	2.15	7.84	4.89	1.15	2.42	2.82	1.11	2.17	2.02	2.39	2.04	11.3	3.14	9.08
Am_HQ_1482	4604	RDX95604.1_Pre-mRNA-splicing factor ATP-dependent RNA helicase DEAH7, partial [Mucuna pruriens]	AT5G13010.1_RNA helicase family protein, GeneName=EMB3011	IPR001650_Helicase, C-terminal; IPR007502_Helicase-associated domain; IPR027417_P-loop containing nucleoside triphosphate hydrolase; IPR011545_DEAD/DEAH box helicase domain; IPR011709_Domain of unknown function DUF1605; IPR014001_Helicase superfamily 1/2, ATP-binding domain	97.35	44.6833	38.7267	55.24	137.4	79.9	74.75	43.38	48.8	41.87	33.21	42.99	39.98	54.34	59.86	51.52
Am_HQ_1483	4589	XP_004499217.1_DNA-directed RNA polymerase II subunit RPB2 [Cicer arietinum]	AT4G21710.1_DNA-directed RNA polymerase family protein, GeneName=NRPB2	IPR007642_RNA polymerase Rpb2, domain 2; IPR007641_RNA polymerase Rpb2, domain 7; IPR007646_RNA polymerase Rpb2, domain 4; IPR007647_RNA polymerase Rpb2, domain 5; IPR007645_RNA polymerase Rpb2, domain 3; IPR007644_RNA polymerase, beta subunit, protrusion; IPR007120_DNA-directed RNA polymerase, subunit 2, hybrid-binding domain	135.817	71.4233	51.8567	56.7467	147.48	88.61	171.36	63.68	77.51	73.08	43.3	56.22	56.05	52.77	54.92	62.55
Am_HQ_1485	4590	XP_027353647.1_splicing factor-like protein 1 [Abrus precatorius] XP_027353648.1 splicing factor-like protein 1 [Abrus precatorius]	AT5G51300.2_splicing factor-like protein	IPR000504_RNA recognition motif domain; IPR036875_Zinc finger, CCHC-type superfamily; IPR035979_RNA-binding domain superfamily; IPR004087_K Homology domain; IPR036612_K Homology domain, type 1 superfamily; IPR004088_K Homology domain, type 1; IPR032570_Splicing factor 1, helix-hairpin domain; IPR001878_Zinc finger, CCHC-type	8.47667	5.41333	4.09333	4.27333	9.45	5.95	10.03	6.09	5.14	5.01	2.77	4.67	4.84	3.92	4.24	4.66
Am_HQ_1487	4590	XP_027359342.1_tripeptidyl-peptidase 2-like isoform X6 [Abrus precatorius]	AT4G20850.1_tripeptidyl peptidase ii, GeneName=TPP2	IPR015500_Peptidase S8, subtilisin-related; IPR022229_Peptidase S8A, tripeptidyl peptidase II; IPR000209_Peptidase S8/S53 domain; IPR036852_Peptidase S8/S53 domain superfamily	7.08333	36.0367	32.02	31.2567	2.2	17.42	1.63	33.15	39.74	35.22	19.23	38.98	37.85	24.41	30.09	39.27
Am_HQ_1489	4588	XP_040872130.1_phosphatase IMPL1, chloroplastic isoform X3 [Glycine max]	AT1G31190.1_myo-inositol monophosphatase like 1, GeneName=IMPL1	IPR000760_Inositol monophosphatase-like	1.14	10.8267	3.28	5.72	1	1.89	0.53	11.91	12.1	8.47	2.07	3.64	4.13	5.45	7.26	4.45
Am_HQ_1491	4424	.	.	.	4.16	7.55667	6.32333	3.94	5.65	4.48	2.35	6.18	10.38	6.11	4.57	7.75	6.65	3.21	5.11	3.5
Am_HQ_1495	4559	TKY60325.1_Regulation of nuclear pre-mRNA domain-containing protein 1B [Spatholobus suberectus]	AT5G10060.1_ENTH/VHS family protein	IPR008942_ENTH/VHS; IPR006569_CID domain	0.323333	1.01667	0.853333	0.766667	0.43	0.17	0.37	0.92	1.43	0.7	1.14	0.84	0.58	0.78	0.84	0.68
Am_HQ_1496	4547	KYP47812.1_TMV resistance protein N, partial [Cajanus cajan]	AT5G36930.3_Disease resistance protein (TIR-NBS-LRR class) family	.	0	0	0	0.0133333	0	0	0	0	0	0	0	0	0	0	0.04	0
Am_HQ_1500	4595	XP_027189840.1_COP1-interacting protein 7 [Cicer arietinum]	AT5G43310.2_COP1-interacting protein-like protein	.	14.22	19.9867	11.75	19.5067	19.8	15.19	7.67	19.49	21.07	19.4	9.76	11.38	14.11	16.74	19.87	21.91
Am_HQ_1501	4584	KYP65229.1_Retrovirus-related Pol polyprotein from transposon TNT 1-94 [Cajanus cajan]	ATMG00240.1_Gag-Pol-related retrotransposon family protein, GeneName=ORF111A	.	1.09	1.57667	1.71333	2.06333	1.54	1.43	0.3	1.53	2.17	1.03	1.63	2.17	1.34	2.7	2.04	1.45
Am_HQ_1505	4580	XP_020204827.1_DNA-directed RNA polymerase 3B, chloroplastic [Cajanus cajan] KYP37443.1 hypothetical protein KK1_041363 [Cajanus cajan]	AT2G24120.1_DNA/RNA polymerases superfamily protein, GeneName=SCA3	IPR043502_DNA/RNA polymerase superfamily; IPR002092_DNA-directed RNA polymerase, phage-type	0.373333	0.45	0.356667	0.623333	0.44	0.44	0.24	0.36	0.66	0.33	0.34	0.38	0.35	0.44	0.22	1.21
Am_HQ_1507	4529	XP_012567955.1_histone acetyltransferase HAC1-like [Cicer arietinum]	AT1G79000.2_histone acetyltransferase of the CBP family 1, GeneName=HAC1	IPR013178_Histone acetyltransferase Rtt109/CBP; IPR011011_Zinc finger, FYVE/PHD-type; IPR000197_Zinc finger, TAZ-type; IPR019787_Zinc finger, PHD-finger; IPR035898_TAZ domain superfamily	2.22333	2.02333	2.16333	2.41667	2.65	2.65	1.37	2.25	2.52	1.3	0.6	2.72	3.17	1.46	1.99	3.8
Am_HQ_1509	4550	XP_004491571.1_nuclear pore complex protein NUP133 isoform X1 [Cicer arietinum]	AT2G05120.2_Nucleoporin, Nup133/Nup155-like protein	IPR014908_Nucleoporin, Nup133/Nup155-like, N-terminal; IPR007187_Nucleoporin, Nup133/Nup155-like, C-terminal	2.95667	7.06	7.21333	12.8367	2.91	3.84	2.12	5.82	8.85	6.51	5.94	8.01	7.69	10.73	12.81	14.97
Am_HQ_1511	4547	QYF11649.1_ABCC8, partial [Glycyrrhiza glabra]	AT3G21250.4_multidrug resistance-associated protein 6, GeneName=ABCC8	IPR003593_AAA+ ATPase domain; IPR036640_ABC transporter type 1, transmembrane domain superfamily; IPR027417_P-loop containing nucleoside triphosphate hydrolase; IPR003439_ABC transporter-like, ATP-binding domain; IPR011527_ABC transporter type 1, transmembrane domain	0	24.5767	16.2767	3.48	0	0	0	23.46	26.93	23.34	10.54	17.19	21.1	4.31	2.25	3.88
Am_HQ_1514	4472	.	.	.	1.20667	0.873333	0.913333	2.02333	1.36	1.76	0.5	0.97	1.32	0.33	0.83	1.58	0.33	2.56	3.07	0.44
Am_HQ_1515	4549	KAG4984129.1_hypothetical protein JHK87_028878 [Glycine soja]	AT5G60750.1_CAAX amino terminal protease family protein	IPR003675_Type II CAAX prenyl endopeptidase Rce1-like	0.296667	1.28667	0.413333	2.10333	0.2	0.69	0	0.44	1.6	1.82	0	0	1.24	1.52	3.2	1.59
Am_HQ_1516	4577	XP_045809014.1_protein CHROMATIN REMODELING 20 [Trifolium pratense]	AT1G08600.3_P-loop containing nucleoside triphosphate hydrolases superfamily protein, GeneName=ATRX	IPR001650_Helicase, C-terminal; IPR027417_P-loop containing nucleoside triphosphate hydrolase; IPR000330_SNF2, N-terminal; IPR014001_Helicase superfamily 1/2, ATP-binding domain	21.4033	15.43	14.4267	16.84	28.34	18.67	17.2	14.68	16.45	15.16	10.26	16.64	16.38	13.72	18.25	18.55
Am_HQ_1517	4576	XP_027362302.1_regulator of nonsense transcripts 1 homolog isoform X1 [Abrus precatorius]	AT5G47010.1_RNA helicase, GeneName=LBA1	IPR041679_DNA2/NAM7 helicase-like, C-terminal; IPR041677_DNA2/NAM7 helicase, helicase domain; IPR027417_P-loop containing nucleoside triphosphate hydrolase; IPR006935_Helicase/UvrB, N-terminal; IPR018999_RNA helicase UPF1, Cys/His rich zinc-binding domain; IPR040812_RNA helicase UPF1, 1B domain	5.26667	0.996667	1.37333	1.04333	6.62	5.53	3.65	1.12	1.31	0.56	1.02	0.85	2.25	0.38	0.42	2.33
Am_HQ_1519	4575	XP_014518263.1_splicing factor 3B subunit 1 [Vigna radiata var. radiata]	AT5G64270.1_splicing factor	IPR015016_Splicing factor 3B subunit 1; IPR016024_Armadillo-type fold; IPR034085_TOG domain	5.54667	8.54333	8.00667	8.31	9.42	2.71	4.51	8.52	7.43	9.68	3.65	4.79	15.58	6.13	1.82	16.98
Am_HQ_1520	4447	XP_012574742.1_LOW QUALITY PROTEIN: synaptotagmin-5-like [Cicer arietinum]	AT3G18370.1_C2 domain-containing protein, GeneName=ATSYTF	IPR035892_C2 domain superfamily; IPR000008_C2 domain	0.216667	5.03	3.40667	2.54	0.07	0.54	0.04	7.57	7.04	0.48	1.61	8.23	0.38	2.81	4.55	0.26
Am_HQ_1522	4571	TKY51774.1_Nuclear pore complex protein NUP1 [Spatholobus suberectus]	AT3G10650.1_nuclear pore complex protein, GeneName=NUP1	.	0.71	1.92333	0.773333	1.29	1.04	0.43	0.66	2.3	1.52	1.95	0.17	1.59	0.56	1.39	1.05	1.43
Am_HQ_1523	4591	BAT89210.1_hypothetical protein VIGAN_06010400 [Vigna angularis var. angularis]	AT5G05170.1_Cellulose synthase family protein, GeneName=CEV1	IPR027934_Cellulose synthase, RING-type zinc finger; IPR005150_Cellulose synthase; IPR029044_Nucleotide-diphospho-sugar transferases	1.04667	0.896667	0.78	5.34333	0.28	0.94	1.92	1.72	0.46	0.51	1.28	0.43	0.63	15.68	0	0.35
Am_HQ_1525	4544	RDX83503.1_Transcriptional corepressor SEUSS, partial [Mucuna pruriens]	AT1G43850.1_SEUSS transcriptional co-regulator, GeneName=SEU	IPR029005_LIM-domain binding protein/SEUSS	7.42667	16.7067	10.6	9.14333	7.63	5.94	8.71	16.1	16.48	17.54	11.41	10.41	9.98	8.19	8.96	10.28
Am_HQ_1527	4566	XP_045823581.1_putative disease resistance RPP13-like protein 1 isoform X1 [Trifolium pratense]	AT3G14470.1_NB-ARC domain-containing disease resistance protein	IPR002182_NB-ARC; IPR027417_P-loop containing nucleoside triphosphate hydrolase; IPR041118_Rx, N-terminal	0.343333	1.29	0.316667	1.26	0.79	0	0.24	1.63	0.49	1.75	0.53	0.05	0.37	2.35	0.22	1.21
Am_HQ_1529	4582	XP_045823581.1_putative disease resistance RPP13-like protein 1 isoform X1 [Trifolium pratense]	AT3G14470.1_NB-ARC domain-containing disease resistance protein	IPR002182_NB-ARC; IPR041118_Rx, N-terminal; IPR027417_P-loop containing nucleoside triphosphate hydrolase	0.18	4.18333	1.34	4.91	0	0.4	0.14	4.96	5.34	2.25	0.61	2.12	1.29	5.37	7.29	2.07
Am_HQ_1531	4500	RZB73881.1_hypothetical protein D0Y65_033141 [Glycine soja] RZB73883.1 hypothetical protein D0Y65_033141 [Glycine soja]	AT1G05320.1_myosin heavy chain, embryonic smooth protein	.	6.66667	2.36	5.12	3.83333	6.41	8.21	5.38	3.67	2.04	1.37	4.36	5.54	5.46	3.44	2.99	5.07
Am_HQ_1533	4564	XP_027190772.1_LOW QUALITY PROTEIN: putative disease resistance RPP13-like protein 1 [Cicer arietinum]	AT3G14470.1_NB-ARC domain-containing disease resistance protein	.	2.32333	12.8433	2.07	9.38667	2.22	2.38	2.37	17.19	8.88	12.46	0.7	2.69	2.82	11.02	7.55	9.59
Am_HQ_1535	4543	RDX98211.1_Pentatricopeptide repeat-containing protein, partial [Mucuna pruriens]	AT5G14080.1_Tetratricopeptide repeat (TPR)-like superfamily protein	IPR002885_Pentatricopeptide repeat	0.0633333	0.39	0.42	0.403333	0.08	0.11	0	0.19	0.53	0.45	0.34	0.47	0.45	0.3	0.51	0.4
Am_HQ_1536	4433	RVW82526.1_Retrovirus-related Pol polyprotein from transposon TNT 1-94 [Vitis vinifera]	AT4G23160.3_cysteine-rich RECEPTOR-like kinase, GeneName=CRK8	IPR043502_DNA/RNA polymerase superfamily	4.32333	7.64333	3.32333	7.59333	5.48	2.46	5.03	6.9	8.22	7.81	0	6.25	3.72	8.12	5.53	9.13
Am_HQ_1540	4417	XP_004487169.1_protein trichome birefringence-like 39 [Cicer arietinum]	AT2G42570.1_TRICHOME BIREFRINGENCE-LIKE 39, GeneName=TBL39	IPR005162_Retrotransposon gag domain; IPR036875_Zinc finger, CCHC-type superfamily; IPR001878_Zinc finger, CCHC-type	1.93667	0.85	1.02667	0.856667	2.08	0.92	2.81	0.65	1.27	0.63	0.5	1.04	1.54	0.47	1.17	0.93
Am_HQ_1541	4456	.	.	.	3.38	1.73	1.95667	3.05333	4.02	3.91	2.21	1.64	2.02	1.53	0.52	3.09	2.26	1.86	4.52	2.78
Am_HQ_1544	4501	XP_012575158.1_glutamate receptor 2.9-like isoform X1 [Cicer arietinum]	AT2G29100.1_glutamate receptor 2.9, GeneName=GLR2.9	IPR017103_Ionotropic glutamate receptor, plant; IPR001320_Ionotropic glutamate receptor; IPR001828_Receptor, ligand binding region; IPR001638_Solute-binding protein family 3/N-terminal domain of MltF; IPR028082_Periplasmic binding protein-like I	6.21333	1.23	0.24	0.153333	7.69	5.66	5.29	0.97	1.94	0.78	0.72	0	0	0.46	0	0
Am_HQ_1546	4537	XP_004497168.1_protein transport protein Sec24-like At4g32640 [Cicer arietinum]	AT3G44340.3_hypothetical protein, GeneName=CEF	IPR036175_Sec23/Sec24 helical domain superfamily; IPR006896_Sec23/Sec24, trunk domain; IPR007123_Gelsolin-like domain; IPR012990_Sec23/Sec24 beta-sandwich; IPR036180_Gelsolin-like domain superfamily; IPR006900_Sec23/Sec24, helical domain; IPR036465_von Willebrand factor A-like domain superfamily	0.78	1.24333	1.19667	1.55333	0.49	0.91	0.94	0.46	2.16	1.11	0.29	1.54	1.76	0.75	2.1	1.81
Am_HQ_1547	4531	PNY14731.1_resistance protein [Trifolium pratense]	AT3G14470.1_NB-ARC domain-containing disease resistance protein	IPR027417_P-loop containing nucleoside triphosphate hydrolase; IPR041118_Rx, N-terminal; IPR002182_NB-ARC	0.49	18.9767	3.68	8.57667	0.34	0.91	0.22	17.58	19.24	20.11	1.32	4.85	4.87	6.63	10.04	9.06
Am_HQ_1551	4557	XP_004498674.1_putative disease resistance RPP13-like protein 1 [Cicer arietinum] XP_027189217.1 putative disease resistance RPP13-like protein 1 [Cicer arietinum]	AT3G14470.1_NB-ARC domain-containing disease resistance protein	IPR002182_NB-ARC; IPR041118_Rx, N-terminal; IPR027417_P-loop containing nucleoside triphosphate hydrolase	15.1067	3.12667	3.56333	7.01333	18.93	21.74	4.65	2.75	4.05	2.58	2.84	4.74	3.11	5.57	7.56	7.91
Am_HQ_1553	4550	RHN75375.1_hypothetical protein MtrunA17_Chr2g0320501 [Medicago truncatula]	.	.	1.84333	4	2.17	2.99	1.7	2.89	0.94	3.56	5.59	2.85	1.24	3.41	1.86	2.52	4.53	1.92
Am_HQ_1557	4553	XP_012571989.1_uncharacterized protein LOC101506436 [Cicer arietinum]	AT3G45750.5_Nucleotidyltransferase family protein	IPR043519_Nucleotidyltransferase superfamily	0.0633333	0.27	0.25	0.17	0.08	0.11	0	0.31	0.36	0.14	0.17	0.33	0.25	0.23	0.2	0.08
Am_HQ_1558	4553	XP_020238463.1_phosphatidylinositol 3,4,5-trisphosphate 3-phosphatase and protein-tyrosine-phosphatase PTEN2A-like [Cajanus cajan]	AT3G19420.1_PTEN 2, GeneName=PEN2	.	0.176667	0.59	0.506667	0.62	0.15	0.3	0.08	0.44	1.08	0.25	0.17	0.59	0.76	0.71	0.77	0.38
Am_HQ_1559	4547	XP_004510542.1_uncharacterized protein LOC101507554 isoform X1 [Cicer arietinum]	AT3G14172.1_GPI-anchored adhesin-like protein	.	2.40333	7.91333	11.2767	12.02	2.28	3.37	1.56	6.18	10.75	6.81	10.68	11.3	11.85	10.76	11.01	14.29
Am_HQ_1562	4519	XP_045827036.1_protein TORNADO 1-like [Trifolium pratense]	AT5G55540.1_tornado 1, GeneName=TRN1	IPR001611_Leucine-rich repeat; IPR027417_P-loop containing nucleoside triphosphate hydrolase; IPR032171_C-terminal of Roc (COR) domain	0.33	1.18	0.386667	4.75333	0.34	0.31	0.34	1.15	0.86	1.53	0.38	0.31	0.47	3.26	3.9	7.1
Am_HQ_1564	4498	XP_027359895.1_kinesin-like protein KIN-14I [Abrus precatorius]	AT5G65930.2_kinesin-like calmodulin-binding protein (ZWICHEL), GeneName=ZWI	IPR001752_Kinesin motor domain; IPR011254_Prismane-like superfamily; IPR019749_Band 4.1 domain; IPR000857_MyTH4 domain; IPR027417_P-loop containing nucleoside triphosphate hydrolase; IPR035963_FERM superfamily, second domain; IPR019748_FERM central domain	2.84333	0.483333	1.57667	3.46333	1.79	4.37	2.37	0.26	1.08	0.11	1.47	1.64	1.62	2.66	1.81	5.92
Am_HQ_1570	4627	XP_003599514.1_putative disease resistance RPP13-like protein 1 [Medicago truncatula] AES69765.1 LRR and NB-ARC domain disease resistance protein [Medicago truncatula] RHN66388.1 putative P-loop containing nucleoside triphosphate hydrolase, leucine-rich repeat domain, L [Medicago truncatula]	AT3G14470.1_NB-ARC domain-containing disease resistance protein	.	0.473333	0.35	0.69	1.19	0	0.93	0.49	0	0.86	0.19	0	1.7	0.37	0	2.44	1.13
Am_HQ_1572	4495	TKY50795.1_transcription factor jumonji (jmjC) domain protein [Spatholobus suberectus]	AT5G55820.7_inner centromere protein, ARK-binding region protein, GeneName=WYR	.	3.23	1.56	3.12667	4.70333	5.45	1.49	2.75	1.23	2.21	1.24	1.36	3.35	4.67	4.24	4.53	5.34
Am_HQ_1573	4347	GAU35356.1_hypothetical protein TSUD_337480 [Trifolium subterraneum]	AT1G07810.1_ER-type Ca2+-ATPase 1, GeneName=ECA1	IPR006068_Cation-transporting P-type ATPase, C-terminal; IPR023298_P-type ATPase, transmembrane domain superfamily; IPR001757_P-type ATPase; IPR036412_HAD-like superfamily	4.11	5.46	5.23667	5.08667	1.26	4.47	6.6	3.99	5.68	6.71	5.43	4.75	5.53	5.45	4.47	5.34
Am_HQ_1574	4530	KYP41477.1_Retrovirus-related Pol polyprotein from transposon TNT 1-94 [Cajanus cajan]	AT4G23160.3_cysteine-rich RECEPTOR-like kinase, GeneName=CRK8	IPR025724_GAG-pre-integrase domain; IPR001584_Integrase, catalytic core; IPR012337_Ribonuclease H-like superfamily	2.87667	4.75	2.91	4.18	2.63	2.35	3.65	5.37	4.76	4.12	1.32	3.65	3.76	5.48	3.19	3.87
Am_HQ_1576	4545	KHN44690.1_Nuclear export mediator factor NEMF like [Glycine soja]	AT5G49930.1_zinc knuckle (CCHC-type) family protein, GeneName=emb1441	IPR036875_Zinc finger, CCHC-type superfamily; IPR001878_Zinc finger, CCHC-type; IPR021846_NFACT protein, C-terminal; IPR008532_NFACT, RNA-binding domain	1.34	1.54333	1.74	1.29333	0.64	1.72	1.66	1.72	1.78	1.13	2.09	1.91	1.22	1.27	2.24	0.37
Am_HQ_1577	4543	XP_004487263.1_phospholipid-transporting ATPase 2 [Cicer arietinum] XP_004487264.1 phospholipid-transporting ATPase 2 [Cicer arietinum] XP_004487265.1 phospholipid-transporting ATPase 2 [Cicer arietinum]	AT5G44240.2_aminophospholipid ATPase 2, GeneName=ALA2	IPR023299_P-type ATPase, cytoplasmic domain N; IPR036412_HAD-like superfamily; IPR023298_P-type ATPase, transmembrane domain superfamily; IPR001757_P-type ATPase; IPR006539_P-type ATPase, subfamily IV; IPR032630_P-type ATPase, C-terminal	0.453333	1.35333	0.823333	0.856667	0.39	0.73	0.24	0.89	1.67	1.5	0.34	1.26	0.87	0.62	0.59	1.36
Am_HQ_1582	4529	XP_004515673.3_uncharacterized protein LOC101491336 [Cicer arietinum]	AT4G08460.4_hypothetical protein (DUF1644)	IPR012866_Protein of unknown function DUF1644	1.19	1.45	1.51333	1.20667	0.56	2.36	0.65	1.22	1.84	1.29	1.05	1.64	1.85	1.18	1.33	1.11
Am_HQ_1583	4534	XP_004488245.1_uncharacterized protein LOC101493462 [Cicer arietinum]	AT1G52540.2_Protein kinase superfamily protein	IPR003690_Transcription termination factor, mitochondrial/chloroplastic	4.62	3.91	3.07333	4.77667	6.39	4.82	2.65	2.58	4.81	4.34	2.61	3.4	3.21	3.61	4.42	6.3
Am_HQ_1586	4550	PNY14726.1_putative UDP-N-acetylglucosamine-peptide N-acetylglucosaminyltransferase SEC-like protein [Trifolium pratense]	AT3G04240.2_Tetratricopeptide repeat (TPR)-like superfamily protein, GeneName=SEC	IPR019734_Tetratricopeptide repeat; IPR011990_Tetratricopeptide-like helical domain superfamily; IPR001440_Tetratricopeptide repeat 1; IPR029489_O-GlcNAc transferase, C-terminal	1.46	1.95667	0.69	2.08667	0	0.85	3.53	2.97	2.54	0.36	1.09	0	0.98	2.34	0.71	3.21
Am_HQ_1588	4527	XP_019425777.1_PREDICTED: alpha,alpha-trehalose-phosphate synthase [UDP-forming] 1-like isoform X2 [Lupinus angustifolius]	AT1G78580.1_trehalose-6-phosphate synthase, GeneName=TPS1	IPR001830_Glycosyl transferase, family 20	0.496667	4.21667	2.14667	1.60667	0.44	0.81	0.24	2.07	6.11	4.47	1.06	2.89	2.49	1.67	2.63	0.52
Am_HQ_1589	4488	GAU18751.1_hypothetical protein TSUD_80400 [Trifolium subterraneum]	AT4G02510.1_translocon at the outer envelope membrane of chloroplasts 159, GeneName=TOC159	IPR005690_Translocase of chloroplast Toc86/159; IPR006703_AIG1-type guanine nucleotide-binding (G) domain; IPR027417_P-loop containing nucleoside triphosphate hydrolase; IPR024283_Translocase of chloroplast 159/132, membrane anchor domain	30.9467	44.4767	40.4133	41.0033	31.8	24.32	36.72	39.24	36.19	58	19.7	38.17	63.37	22.9	31.31	68.8
Am_HQ_1594	4505	XP_004502930.1_phosphatidylinositol 4-kinase beta 1 isoform X1 [Cicer arietinum]	AT5G64070.1_phosphatidylinositol 4-OH kinase beta1, GeneName=PI-4KBETA1	IPR000403_Phosphatidylinositol 3-/4-kinase, catalytic domain; IPR011009_Protein kinase-like domain superfamily; IPR016024_Armadillo-type fold	11.0167	11.5	9.70667	12.8233	11.04	14.95	7.06	9.31	15.44	9.75	3.45	13.32	12.35	6.27	15.01	17.19
Am_HQ_1596	4471	MBA0597562.1_hypothetical protein [Gossypium raimondii]	AT2G19880.1_Nucleotide-diphospho-sugar transferases superfamily protein	.	0.196667	0.466667	0.276667	0.23	0.14	0.28	0.17	0.14	0.81	0.45	0.07	0.55	0.21	0.22	0.33	0.14
Am_HQ_1600	4465	XP_003623967.1_uncharacterized protein LOC11433194 isoform X1 [Medicago truncatula] XP_024627312.1 uncharacterized protein LOC11433194 isoform X1 [Medicago truncatula] ABD32828.1 {, related [Medicago truncatula] AES80185.1 phosphatidylinositol N-acetyglucosaminlytransferase subunit P-like protein [Medicago truncatula] RHN46961.1 hypothetical protein MtrunA17_Chr7g0247821 [Medicago truncatula]	AT4G00440.4_GPI-anchored adhesin-like protein, putative (DUF3741), GeneName=TRM15	IPR025486_Domain of unknown function DUF4378; IPR022212_Domain of unknown function DUF3741	22.1033	7.84667	13.2533	45.9933	21.99	17.14	27.18	8.36	7.16	8.02	15.93	14.02	9.81	39.4	45.13	53.45
Am_HQ_1604	4530	XP_004492708.1_K(+) efflux antiporter 2, chloroplastic-like [Cicer arietinum]	AT4G00630.1_K+ efflux antiporter 2, GeneName=KEA2	IPR006153_Cation/H+ exchanger; IPR036291_NAD(P)-binding domain superfamily; IPR004771_K+/H+ exchanger; IPR003148_Regulator of K+ conductance, N-terminal	8.52667	48.7533	15.0967	17.3233	7	10.01	8.57	59.18	42.02	45.06	9.22	17.35	18.72	17.13	16.1	18.74
Am_HQ_1607	4400	.	.	.	0.27	0.9	1.49333	1.02	0.36	0.39	0.06	0.52	1.6	0.58	1.1	2.14	1.24	2.01	0.62	0.43
Am_HQ_1610	4525	XP_045825487.1_AP-5 complex subunit beta-1 [Trifolium pratense] PNY05693.1 hypothetical protein L195_g002148 [Trifolium pratense]	AT3G19870.2_AP-5 complex subunit beta-like protein	.	5.57333	9.81333	10.5267	11.0433	3.95	6.34	6.43	7.84	11.03	10.57	7.81	12.91	10.86	9.3	11.4	12.43
Am_HQ_1612	4527	.	.	.	0	0	0.926667	0	0	0	0	0	0	0	0	0	2.78	0	0	0
Am_HQ_1613	4525	RHN69146.1_hypothetical protein MtrunA17_Chr3g0121561 [Medicago truncatula]	AT5G14880.1_Potassium transporter family protein	.	0.203333	0.596667	1.38333	1.76333	0	0.61	0	0	0.76	1.03	0	2.26	1.89	0.99	1.25	3.05
Am_HQ_1614	4464	XP_012568616.1_UBP1-associated protein 2B-like [Cicer arietinum] XP_012568617.1 UBP1-associated protein 2B-like [Cicer arietinum] XP_027187793.1 UBP1-associated protein 2B-like [Cicer arietinum] XP_027187794.1 UBP1-associated protein 2B-like [Cicer arietinum]	AT2G41060.1_RNA-binding (RRM/RBD/RNP motifs) family protein	IPR035979_RNA-binding domain superfamily; IPR000504_RNA recognition motif domain	7.36333	12.8033	9.78333	14.4333	7.04	9.9	5.15	11.1	17.14	10.17	6.59	12.05	10.71	11.02	19.07	13.21
Am_HQ_1616	4255	XP_027192671.1_myosin-2-like [Cicer arietinum]	AT5G54280.2_myosin 2, GeneName=ATM2	IPR001609_Myosin head, motor domain; IPR027417_P-loop containing nucleoside triphosphate hydrolase; IPR000048_IQ motif, EF-hand binding site	0.666667	20.3733	10.4633	11.0333	0.57	1.17	0.26	19.83	19.04	22.25	8.6	10.38	12.41	11.64	8.37	13.09
Am_HQ_1618	4507	XP_027345863.1_uncharacterized protein LOC113857830 [Abrus precatorius]	AT5G22450.2_spectrin beta chain, brain	.	0.223333	0.22	0.196667	0.236667	0.25	0.13	0.29	0.14	0.32	0.2	0.08	0.27	0.24	0.08	0.39	0.24
Am_HQ_1619	4493	YP_009242008.1_NADH dehydrogenase subunit 4 [Oryza minuta] AMQ23370.1 NADH dehydrogenase subunit 4 [Oryza minuta]	ATMG00580.1_NADH dehydrogenase subunit 4, GeneName=NAD4	IPR001750_NADH:quinone oxidoreductase/Mrp antiporter, membrane subunit	0.19	0.163333	0.283333	0.25	0	0.18	0.39	0.11	0.29	0.09	0.54	0.22	0.09	0.14	0.29	0.32
Am_HQ_1625	4503	GAU13916.1_hypothetical protein TSUD_262430 [Trifolium subterraneum]	AT5G01620.1_TRICHOME BIREFRINGENCE-LIKE 35, GeneName=TBL35	IPR026057_PC-Esterase	0.0266667	0.193333	0.566667	0.21	0	0.08	0	0.16	0.37	0.05	0.72	0.47	0.51	0.32	0.28	0.03
Am_HQ_1626	4392	XP_004486961.1_xanthine dehydrogenase 1-like [Cicer arietinum]	AT4G34890.1_xanthine dehydrogenase 1, GeneName=XDH1	IPR005107_CO dehydrogenase flavoprotein, C-terminal; IPR036683_CO dehydrogenase flavoprotein, C-terminal domain superfamily; IPR000674_Aldehyde oxidase/xanthine dehydrogenase, a/b hammerhead; IPR002346_Molybdopterin dehydrogenase, FAD-binding; IPR002888_[2Fe-2S]-binding; IPR037165_Aldehyde oxidase/xanthine dehydrogenase, molybdopterin binding domain superfamily; IPR036318_FAD-binding, type PCMH-l…	49.1367	40.95	25.9	36.28	40.96	61.04	45.41	42.35	41.77	38.73	15.62	32	30.08	33.49	39.27	36.08
Am_HQ_1628	4498	XP_004487236.1_pre-mRNA-splicing factor ATP-dependent RNA helicase DEAH7 [Cicer arietinum]	AT5G13010.1_RNA helicase family protein, GeneName=EMB3011	.	47.7967	16.5867	13.6133	23.8667	71.06	38.69	33.64	16.44	17.43	15.89	8.34	18.04	14.46	19.46	27.58	24.56
Am_HQ_1631	4507	TKY52629.1_TIME FOR COFFEE protein [Spatholobus suberectus]	AT3G22380.1_time for coffee, GeneName=TIC	.	6.63	6.08333	6.35667	8.95	3.19	6.73	9.97	2.71	7.97	7.57	4.9	8.91	5.26	8.34	9.93	8.58
Am_HQ_1632	4509	XP_012571932.1_phosphatidylinositol 4-kinase beta 1 isoform X2 [Cicer arietinum]	AT5G64070.1_phosphatidylinositol 4-OH kinase beta1, GeneName=PI-4KBETA1	IPR016024_Armadillo-type fold	4.51333	5.86667	9.45667	7.28	2.91	5.29	5.34	5.28	5.07	7.25	12.31	9.1	6.96	8.56	6.85	6.43
Am_HQ_1637	4498	PNY08641.1_calcium-transporting ATPase plasma membrane-type-like protein [Trifolium pratense]	AT2G41560.1_autoinhibited Ca(2+)-ATPase, isoform 4, GeneName=ACA4	IPR006068_Cation-transporting P-type ATPase, C-terminal; IPR001757_P-type ATPase; IPR023298_P-type ATPase, transmembrane domain superfamily; IPR008250_P-type ATPase, A domain superfamily; IPR036412_HAD-like superfamily; IPR006408_P-type ATPase, subfa	1.55	2.91	1.03	2.34667	1.11	2.15	1.39	2.45	2.16	4.12	0.45	0.98	1.66	1.68	1.65	3.71
Am_HQ_1638	4517	YP_009237616.1_ATPase subunit 1 [Medicago truncatula] AML26827.1 ATPase subunit 1 [Medicago truncatula]	ATMG01190.1_ATP synthase subunit 1, GeneName=ATP1	IPR000793_ATP synthase, alpha subunit, C-terminal; IPR005294_ATP synthase, F1 complex, alpha subunit; IPR004100_ATPase, F1/V1/A1 complex, alpha/beta subunit, N-terminal domain; IPR027417_P-loop containing nucleoside triphosphate hydrolase; IPR036121_ATPase, F1/V1/A1 complex, alpha/beta subunit, N-terminal domain superfamily; IPR000194_ATPase, F1/V1/A1 complex, alpha/beta subunit, nucleotide-bindi…	0.27	0.183333	0.83	0.37	0.16	0.12	0.53	0.17	0.15	0.23	1.94	0.19	0.36	0.4	0.35	0.36
Am_HQ_1639	4515	XP_045803824.1_uncharacterized protein LOC123897287 [Trifolium pratense] XP_045803825.1 uncharacterized protein LOC123897287 [Trifolium pratense] XP_045803826.1 uncharacterized protein LOC123897287 [Trifolium pratense] XP_045803827.1 uncharacterized protein LOC123897287 [Trifolium pratense]	.	IPR019354_Smg8/Smg9	0.646667	2.07333	1.48	2.23333	0.42	0.83	0.69	2.09	1.51	2.62	1.85	1.24	1.35	3.36	1.72	1.62
Am_HQ_1641	4513	XP_027344205.1_DExH-box ATP-dependent RNA helicase DExH3 [Abrus precatorius]	AT1G48650.1_DEA(D/H)-box RNA helicase family protein	IPR027417_P-loop containing nucleoside triphosphate hydrolase; IPR001650_Helicase, C-terminal; IPR014001_Helicase superfamily 1/2, ATP-binding domain; IPR007502_Helicase-associated domain; IPR011545_DEAD/DEAH box helicase domain; IPR014720_Double-stranded RNA-binding domain; IPR011709_Domain of unknown function DUF1605	8.68667	12.4533	8.94333	12.0567	7.71	7.04	11.31	9.09	9.95	18.32	4.73	7.56	14.54	9.38	6.69	20.1
Am_HQ_1645	4446	XP_012569066.1_TMV resistance protein N isoform X1 [Cicer arietinum] XP_012569068.1 TMV resistance protein N isoform X1 [Cicer arietinum] XP_012569069.1 TMV resistance protein N isoform X1 [Cicer arietinum] XP_012569071.1 TMV resistance protein N isoform X1 [Cicer arietinum] XP_012569072.1 TMV resistance protein N isoform X1 [Cicer arietinum] XP_027188764.1 TMV resistance protein N isoform X1 [Ci…	AT5G17680.1_disease resistance protein (TIR-NBS-LRR class)	IPR000157_Toll/interleukin-1 receptor homology (TIR) domain; IPR027417_P-loop containing nucleoside triphosphate hydrolase; IPR035897_Toll/interleukin-1 receptor homology (TIR) domain superfamily; IPR011713_Leucine-rich repeat 3; IPR002182_NB-ARC; IPR036390_Winged helix DNA-binding domain superfamily	1.95333	1.16667	0.613333	2.30667	0.96	1.54	3.36	1.48	1.15	0.87	0.5	0.31	1.03	4.08	0.57	2.27
Am_HQ_1646	4514	TKY59286.1_Mediator of RNA polymerase II transcription subunit 16 [Spatholobus suberectus]	AT4G04920.2_sensitive to freezing 6, GeneName=SFR6	.	7.51333	7.30333	5.07333	8.07333	13.36	8.39	0.79	9.28	11.07	1.56	5.2	8.36	1.66	10.05	12.71	1.46
Am_HQ_1647	4521	XP_045795976.1_ABC transporter G family member 39-like [Trifolium pratense]	AT1G66950.1_pleiotropic drug resistance 11, GeneName=ABCG39	IPR003439_ABC transporter-like, ATP-binding domain; IPR003593_AAA+ ATPase domain; IPR029481_ABC-transporter, N-terminal domain; IPR043926_ABC transporter family G domain; IPR013525_ABC-2 type transporter; IPR027417_P-loop containing nucleoside triphosphate hydrolase	2.22333	3.13	3.03333	3.44	2.29	2.81	1.57	4.21	3.31	1.87	4.87	2.87	1.36	5.59	3.12	1.61
Am_HQ_1649	4448	MCH80527.1_peptide transporter PTR2 [Trifolium medium]	AT4G23160.3_cysteine-rich RECEPTOR-like kinase, GeneName=CRK8	IPR001584_Integrase, catalytic core; IPR012337_Ribonuclease H-like superfamily	2.17667	6.41667	3.36333	3.89333	2.55	3.12	0.86	7.03	6.66	5.56	1.72	4.84	3.53	3.95	3.43	4.3
Am_HQ_1650	4477	KEH24132.1_ubiquitin-protein ligase [Medicago truncatula]	AT2G36370.1_ubiquitin-protein ligase	IPR006553_Leucine-rich repeat, cysteine-containing subtype	1.48	2.66667	2.28667	3.23	0.6	2.26	1.58	2.65	3.56	1.79	3.05	2.68	1.13	3.16	4.62	1.91
Am_HQ_1654	4511	XP_007158039.1_hypothetical protein PHAVU_002G119000g [Phaseolus vulgaris] ESW30033.1 hypothetical protein PHAVU_002G119000g [Phaseolus vulgaris]	AT2G17420.2_NADPH-dependent thioredoxin reductase A, GeneName=NTRA	IPR036188_FAD/NAD(P)-binding domain superfamily; IPR023753_FAD/NAD(P)-binding domain; IPR005982_Thioredoxin reductase	1.64667	0.553333	0.436667	0.876667	0.69	2.26	1.99	0.68	0.48	0.5	0.16	0.63	0.52	1.24	0.63	0.76
Am_HQ_1656	4469	TKY46808.1_ATP-dependent DNA helicase PIF1 [Spatholobus suberectus]	AT4G29090.1_Ribonuclease H-like superfamily protein	IPR027417_P-loop containing nucleoside triphosphate hydrolase; IPR010285_DNA helicase Pif1-like	0.173333	1.02333	0.683333	0.6	0.22	0.24	0.06	0.88	1.27	0.92	0.77	0.74	0.54	0.4	0.64	0.76
Am_HQ_1657	4465	XP_004506842.1_uncharacterized protein LOC101514293 isoform X1 [Cicer arietinum]	AT1G15240.2_phox (PX) domain-containing protein	IPR036871_PX domain superfamily; IPR001683_Phox homology	0.343333	0.88	1.10333	0.936667	0.41	0.52	0.1	0.76	0.65	1.23	1.12	1.56	0.63	1.45	0.68	0.68
Am_HQ_1661	4435	XP_027359340.1_tripeptidyl-peptidase 2-like isoform X4 [Abrus precatorius]	AT4G20850.1_tripeptidyl peptidase ii, GeneName=TPP2	IPR022229_Peptidase S8A, tripeptidyl peptidase II; IPR015500_Peptidase S8, subtilisin-related; IPR036852_Peptidase S8/S53 domain superfamily; IPR000209_Peptidase S8/S53 domain	3.52667	14.93	14.6667	14.3433	1.5	6.39	2.69	14.33	14.15	16.31	11.59	15.51	16.9	8.68	13.65	20.7
Am_HQ_1662	4507	XP_003589088.2_uncharacterized protein LOC11414216 isoform X2 [Medicago truncatula] AES59339.2 SPOC domain protein [Medicago truncatula] RHN77239.1 putative nucleotide-binding alpha-beta plait domain, SPOC-like domain-containing protein [Medicago truncatula]	AT1G27750.1_nucleic acid binding protein	IPR000504_RNA recognition motif domain; IPR035979_RNA-binding domain superfamily	4.03333	1.15333	0.606667	1.18667	10.97	0.81	0.32	2.66	0.27	0.53	0.93	0.65	0.24	2.58	0.4	0.58
Am_HQ_1664	4403	XP_045824140.1_zinc finger protein BRUTUS-like isoform X1 [Trifolium pratense]	AT3G18290.1_zinc finger protein-like protein, GeneName=BTS	IPR001841_Zinc finger, RING-type; IPR037275_Zinc finger, CTCHY-type superfamily; IPR008913_Zinc finger, CHY-type; IPR037274_Zinc finger, CHY-type superfamily; IPR039512_RCHY1, zinc-ribbon; IPR012312_Hemerythrin-like	5.59	11.2567	11.3533	7.40333	7.08	4.77	4.92	10.84	10.98	11.95	8.87	13.05	12.14	8.44	6.3	7.47
Am_HQ_1666	4504	OWZ24748.1_Retrovirus Polyprotein [Phytophthora megakarya]	.	IPR043502_DNA/RNA polymerase superfamily; IPR012337_Ribonuclease H-like superfamily; IPR000953_Chromo/chromo shadow domain; IPR041588_Integrase zinc-binding domain; IPR016197_Chromo-like domain superfamily; IPR041373_Reverse transcriptase, RNase H-like domain; IPR023780_Chromo domain; IPR000477_Reverse transcriptase domain	0.106667	0	0	0	0.17	0.07	0.08	0	0	0	0	0	0	0	0	0
Am_HQ_1668	4489	XP_029129176.1_probable serine/threonine-protein kinase drkD [Cajanus cajan]	AT1G79570.1_kinase superfamily with octicosapeptide/Phox/Bem1p domain-containing protein	IPR000719_Protein kinase domain; IPR000270_PB1 domain; IPR001245_Serine-threonine/tyrosine-protein kinase, catalytic domain; IPR011009_Protein kinase-like domain superfamily	55.5733	113	82.09	114.397	44.91	74.63	47.18	116.59	110.69	111.72	52.15	96.46	97.66	108.93	123.64	110.62
Am_HQ_1669	4503	XP_045820456.1_myosin-1-like [Trifolium pratense] XP_045820464.1 myosin-1-like [Trifolium pratense]	AT3G19960.1_myosin 1, GeneName=ATM1	IPR000048_IQ motif, EF-hand binding site; IPR027417_P-loop containing nucleoside triphosphate hydrolase; IPR001609_Myosin head, motor domain	18.17	16.6933	28.6	22.7133	15.06	24.58	14.87	17.13	19.62	13.33	27.49	34.86	23.45	25.68	25.36	17.1
Am_HQ_1671	4502	XP_003610900.1_pentatricopeptide repeat-containing protein At3g18110, chloroplastic [Medicago truncatula] AES93858.1 PPR containing plant-like protein [Medicago truncatula] RHN53454.1 putative tetratricopeptide-like helical domain-containing protein [Medicago truncatula]	AT3G18110.1_Pentatricopeptide repeat (PPR) superfamily protein, GeneName=EMB1270	IPR002885_Pentatricopeptide repeat; IPR011990_Tetratricopeptide-like helical domain superfamily	0.246667	14.1567	5.17667	5.59	0.1	0.56	0.08	15.54	14.49	12.44	3.13	6.67	5.73	3.61	4.71	8.45
Am_HQ_1674	4500	KEH17304.1_cytochrome O ubiquinol oxidase subunit I [Medicago truncatula]	ATMG01360.1_cytochrome oxidase, GeneName=COX1	.	8.17333	15.1467	14.3533	34.06	4.5	16.21	3.81	11.53	17.26	16.65	5.96	19.16	17.94	36.1	29.71	36.37
Am_HQ_1675	4422	XP_019441909.1_PREDICTED: TMV resistance protein N-like [Lupinus angustifolius] OIW12636.1 hypothetical protein TanjilG_24569 [Lupinus angustifolius]	AT5G36930.3_Disease resistance protein (TIR-NBS-LRR class) family	IPR002182_NB-ARC; IPR000157_Toll/interleukin-1 receptor homology (TIR) domain; IPR027417_P-loop containing nucleoside triphosphate hydrolase; IPR035897_Toll/interleukin-1 receptor homology (TIR) domain superfamily	6.15	9.69	5.86667	10.4133	8.19	4.8	5.46	8	11.92	9.15	5.34	5.75	6.51	7.64	11.31	12.29
Am_HQ_1678	4496	KAE9602358.1_hypothetical protein Lalb_Chr12g0198741 [Lupinus albus]	AT2G24020.2_Putative BCR, YbaB family COG0718	.	0.226667	0.946667	0.716667	1.01667	0.37	0.19	0.12	0.92	1.06	0.86	0.33	0.9	0.92	1.14	1.01	0.9
Am_HQ_1679	4460	KAG4947068.1_hypothetical protein JHK87_043075 [Glycine soja] KAG5117244.1 hypothetical protein JHK84_043357 [Glycine max]	.	.	0.62	0.96	0.506667	0.803333	0.5	1.3	0.06	0.85	1.35	0.68	0.23	0.75	0.54	0.92	1.06	0.43
Am_HQ_1681	4502	XP_004493617.1_uncharacterized protein LOC101489385 [Cicer arietinum]	AT3G58050.1_hypothetical protein	.	24.0467	26.76	23.4867	19.76	24.17	24.79	23.18	24.12	25.33	30.83	15.98	28.07	26.41	17.26	20.1	21.92
Am_HQ_1688	4489	YP_009242955.1_RNA polymerase beta&apos;&apos; subunit [Astragalus mongholicus] YP_009760370.1 RNA polymerase beta&apos;&apos; subunit [Astragalus gummifer] AMQ99218.1 RNA polymerase beta&apos;&apos; subunit [Astragalus mongholicus] QIQ57173.1 RNA polymerase beta&apos;&apos; subunit [Astragalus gummifer] QTK20891.1 RNA polymerase beta&apos;&apos; subunit [Astragalus mongholicus]	ATCG00180.1_DNA-directed RNA polymerase family protein, GeneName=RPOC1	IPR007081_RNA polymerase Rpb1, domain 5; IPR007083_RNA polymerase Rpb1, domain 4; IPR012756_DNA-directed RNA polymerase, subunit beta''	0.0333333	0.213333	0.553333	0.38	0.1	0	0	0.51	0.13	0	0.41	1.02	0.23	0.23	0.31	0.6
Am_HQ_1689	4497	XP_004499362.1_cullin-associated NEDD8-dissociated protein 1 [Cicer arietinum]	AT2G02560.2_cullin-associated and neddylation dissociated, GeneName=CAND1	IPR013932_TATA-binding protein interacting (TIP20); IPR016024_Armadillo-type fold	16.9367	31.1467	29.6033	37.48	15.07	24.89	10.85	28.98	34.96	29.5	23.89	33.14	31.78	27.96	35.84	48.64
Am_HQ_1694	4492	XP_012572160.1_uncharacterized protein At4g10930 isoform X5 [Cicer arietinum]	AT4G10930.2_RING/U-box protein	IPR011011_Zinc finger, FYVE/PHD-type; IPR019787_Zinc finger, PHD-finger; IPR001965_Zinc finger, PHD-type	5.04667	5.30333	7.01333	5.84667	3.63	6.09	5.42	5.64	4.93	5.34	5.35	8.54	7.15	7.76	3.65	6.13
Am_HQ_1696	4503	XP_027353258.1_regulator of nonsense transcripts UPF2 [Abrus precatorius]	AT2G39260.1_regulator of nonsense transcripts UPF2	IPR003890_MIF4G-like, type 3; IPR007193_Up-frameshift suppressor 2, C-terminal; IPR016024_Armadillo-type fold	47.8067	27.3667	29.5533	33.7533	76.35	27	40.07	25.12	30	26.98	24.02	33.94	30.7	28.74	33.3	39.22
Am_HQ_1697	4486	KAG4992250.1_hypothetical protein JHK87_025707 [Glycine soja] RZB93116.1 hypothetical protein D0Y65_024820 [Glycine soja] RZB93117.1 hypothetical protein D0Y65_024820 [Glycine soja]	AT2G35585.2_cystic fibrosis transmembrane conductance regulator	.	0.923333	4.55667	3.84333	3.18	1.27	0.81	0.69	4.52	5.07	4.08	2.57	4.41	4.55	3.32	3.39	2.83
Am_HQ_1698	4489	XP_013464841.1_uncharacterized protein LOC25487444 [Medicago truncatula] XP_024632358.1 uncharacterized protein LOC25487444 [Medicago truncatula] KEH38876.1 DUF2146 family protein [Medicago truncatula] RHN75359.1 hypothetical protein MtrunA17_Chr2g0320301 [Medicago truncatula]	.	IPR019354_Smg8/Smg9	6.95667	11.01	9.46333	10.54	6.42	10.29	4.16	9.74	13.06	10.23	6.09	12.95	9.35	8.32	11.15	12.15
Am_HQ_1699	4521	XP_004498107.1_uncharacterized protein LOC101491762 isoform X1 [Cicer arietinum]	AT1G79190.1_ARM repeat superfamily protein	IPR016024_Armadillo-type fold	10.79	17.87	14.5	14.9633	10.3	13	9.07	16.55	17.35	19.71	11.99	15.97	15.54	12.77	14.37	17.75
Am_HQ_1703	4485	XP_024633155.1_receptor-like serine/threonine-protein kinase ALE2 isoform X4 [Medicago truncatula]	AT5G56890.1_Protein kinase superfamily protein	IPR001245_Serine-threonine/tyrosine-protein kinase, catalytic domain; IPR011009_Protein kinase-like domain superfamily	17.4567	17.5233	15.5733	14.04	27.13	14.42	10.82	15.02	18.92	18.63	14.54	15.77	16.41	17.23	13.27	11.62
Am_HQ_1704	4414	XP_003555836.1_cyclic pyranopterin monophosphate synthase, mitochondrial isoform X1 [Glycine max] XP_006605838.1 cyclic pyranopterin monophosphate synthase, mitochondrial isoform X1 [Glycine max] XP_028219721.1 cyclic pyranopterin monophosphate synthase, mitochondrial isoform X1 [Glycine soja] XP_028219722.1 cyclic pyranopterin monophosphate synthase, mitochondrial isoform X1 [Glycine soja] KAG49…	AT1G01290.1_cofactor of nitrate reductase and xanthine dehydrogenase 3, GeneName=CNX3	IPR023045_Molybdenum cofactor biosynthesis C; IPR036522_Molybdopterin cofactor biosynthesis C (MoaC) domain superfamily; IPR002820_Molybdopterin cofactor biosynthesis C (MoaC) domain	0.44	5.16	5.57667	5.39333	0.17	1.08	0.07	4.3	6.34	4.84	3.79	7.08	5.86	4.88	5.83	5.47
Am_HQ_1706	4501	XP_027339238.1_serine/threonine-protein kinase RUNKEL [Abrus precatorius]	AT5G18700.1_kinase family with ARM repeat domain-containing protein	IPR011009_Protein kinase-like domain superfamily; IPR000719_Protein kinase domain; IPR016024_Armadillo-type fold	0.0133333	0.66	4.21333	1.61	0	0.02	0.02	0.46	0.94	0.58	3.59	4.19	4.86	0.8	1.01	3.02
Am_HQ_1707	4482	XP_028118191.1_histone acetyltransferase HAC1-like isoform X3 [Camellia sinensis]	AT3G12980.2_histone acetyltransferase of the CBP family 5, GeneName=HAC5	.	0.96	4.63667	3.25667	4.12	1.05	1.45	0.38	3.5	5.9	4.51	1.77	4.62	3.38	4	4.61	3.75
Am_HQ_1708	4481	TKY61337.1_Exportin-4 protein [Spatholobus suberectus]	AT3G04490.2_exportin-4 protein	IPR014877_Exportin-1, C-terminal; IPR016024_Armadillo-type fold	5.31333	10.6767	7.25	16.7567	3.18	10.55	2.21	9.8	12.5	9.73	5.93	8.91	6.91	16.28	15.59	18.4
Am_HQ_1710	4372	TKY53756.1_hypothetical protein E2542_SST25298 [Spatholobus suberectus]	AT5G43310.5_COP1-interacting protein-like protein	.	0.223333	0.693333	3.02667	1.1	0	0.17	0.5	0.34	0.76	0.98	2.66	3	3.42	1.02	0.89	1.39
Am_HQ_1711	4485	XP_045801195.1_tubby-like F-box protein 7 [Trifolium pratense]	AT1G53320.1_tubby like protein 7, GeneName=TLP7	IPR025659_Tubby-like, C-terminal; IPR001810_F-box domain; IPR000007_Tubby, C-terminal; IPR036047_F-box-like domain superfamily	1.64667	0.596667	0.563333	1.22333	1.4	1.81	1.73	0.76	0.48	0.55	0.25	0.55	0.89	2.16	0.45	1.06
Am_HQ_1715	4446	XP_012569066.1_TMV resistance protein N isoform X1 [Cicer arietinum] XP_012569068.1 TMV resistance protein N isoform X1 [Cicer arietinum] XP_012569069.1 TMV resistance protein N isoform X1 [Cicer arietinum] XP_012569071.1 TMV resistance protein N isoform X1 [Cicer arietinum] XP_012569072.1 TMV resistance protein N isoform X1 [Cicer arietinum] XP_027188764.1 TMV resistance protein N isoform X1 [Ci…	AT5G17680.1_disease resistance protein (TIR-NBS-LRR class)	IPR000157_Toll/interleukin-1 receptor homology (TIR) domain; IPR027417_P-loop containing nucleoside triphosphate hydrolase; IPR035897_Toll/interleukin-1 receptor homology (TIR) domain superfamily; IPR011713_Leucine-rich repeat 3; IPR002182_NB-ARC; IPR036390_Winged helix DNA-binding domain superfamily	14.2767	24.5467	11.8867	22.8467	6.39	13.28	23.16	18.36	20.23	35.05	5	10.03	20.63	21.78	17.46	29.3
Am_HQ_1717	4474	XP_012575158.1_glutamate receptor 2.9-like isoform X1 [Cicer arietinum]	AT2G29100.1_glutamate receptor 2.9, GeneName=GLR2.9	IPR017103_Ionotropic glutamate receptor, plant; IPR001638_Solute-binding protein family 3/N-terminal domain of MltF; IPR028082_Periplasmic binding protein-like I; IPR001320_Ionotropic glutamate receptor; IPR001828_Receptor, ligand binding region	6.96	0.07	0.306667	0.543333	7.78	2.99	10.11	0	0	0.21	0	0.34	0.58	0	1.05	0.58
Am_HQ_1720	4390	TKY59286.1_Mediator of RNA polymerase II transcription subunit 16 [Spatholobus suberectus]	AT4G04920.2_sensitive to freezing 6, GeneName=SFR6	.	10.2333	9.56333	7.32	12.0067	10.29	9.93	10.48	7.47	8.84	12.38	3.15	7	11.81	8.86	9.83	17.33
Am_HQ_1722	4474	XP_004492605.1_mediator of RNA polymerase II transcription subunit 33A-like isoform X1 [Cicer arietinum]	AT3G23590.1_REF4-related 1, GeneName=RFR1	.	0.646667	4.65	2.8	4.87333	0.32	1.31	0.31	3.68	5.97	4.3	2.76	2.83	2.81	4.2	3.85	6.57
Am_HQ_1727	4472	XP_004510242.1_vacuolar sorting protein 3 isoform X1 [Cicer arietinum]	AT1G22860.1_Vacuolar sorting protein 39	IPR011047_Quinoprotein alcohol dehydrogenase-like superfamily; IPR001180_Citron homology (CNH) domain	0.58	3.06667	1.27667	2.13	0.69	0.49	0.56	3.7	3.12	2.38	1.76	1.18	0.89	1.99	2.17	2.23
Am_HQ_1729	4386	GAU25118.1_hypothetical protein TSUD_274070 [Trifolium subterraneum]	AT3G16000.1_MAR binding filament-like protein 1, GeneName=MFP1	.	0.433333	9.07	3.33667	2.77	0.48	0.56	0.26	10.08	9.09	8.04	1.66	4.03	4.32	2.03	3.06	3.22
Am_HQ_1731	4425	RHN66204.1_putative wall-associated receptor kinase, galacturonan-binding domain-containing protein [Medicago truncatula]	.	IPR025287_Wall-associated receptor kinase, galacturonan-binding domain	0	1.83	0.26	0.93	0	0	0	2.36	3.13	0	0.78	0	0	1.94	0.85	0
Am_HQ_1732	4475	XP_004493187.1_uncharacterized protein LOC101515516 [Cicer arietinum] XP_012569218.1 uncharacterized protein LOC101515516 [Cicer arietinum] XP_012569219.1 uncharacterized protein LOC101515516 [Cicer arietinum] XP_027188553.1 uncharacterized protein LOC101515516 [Cicer arietinum]	AT3G03790.2_ankyrin repeat family protein / regulator of chromosome condensation (RCC1) family protein	IPR009091_Regulator of chromosome condensation 1/beta-lactamase-inhibitor protein II	1.67667	9.45333	6.76333	3.46333	1.57	2.73	0.73	15.3	11.72	1.34	7.18	12.48	0.63	6.07	4.11	0.21
Am_HQ_1734	4470	XP_004499083.1_uncharacterized protein LOC101514142 [Cicer arietinum]	AT4G11800.1_Calcineurin-like metallo-phosphoesterase superfamily protein	.	17.7667	29.1433	26.7933	17.47	5.2	29.22	18.88	24.04	39.64	23.75	16.31	39.61	24.46	17.39	21.33	13.69
Am_HQ_1735	4188	XP_027339383.1_ribosome biogenesis protein BOP1 homolog [Abrus precatorius]	AT2G40360.2_Transducin/WD40 repeat-like superfamily protein	IPR001680_WD40 repeat; IPR036322_WD40-repeat-containing domain superfamily; IPR012953_BOP1, N-terminal domain	0.33	1.23333	1.19	0.946667	0.58	0	0.41	1.15	0.06	2.49	0.64	0.1	2.83	0.75	0.16	1.93
Am_HQ_1736	4479	TKY48578.1_SMG8 protein [Spatholobus suberectus]	.	IPR019354_Smg8/Smg9	6.25	7.38667	6.55333	9.16667	7.7	6.44	4.61	6.09	7.26	8.81	6.49	5.82	7.35	7.59	8.95	10.96
Am_HQ_1739	4468	XP_045817533.1_uncharacterized protein LOC123910467 [Trifolium pratense]	AT1G22930.1_T-complex protein 11	IPR008862_T-complex 11	1.04	0.2	0.543333	0.803333	0	3.12	0	0	0.6	0	0	1.63	0	0	2.41	0
Am_HQ_1740	4304	XP_003518619.1_RNA-dependent RNA polymerase 1 [Glycine max] XP_006574822.1 RNA-dependent RNA polymerase 1 [Glycine max] XP_006574823.1 RNA-dependent RNA polymerase 1 [Glycine max] XP_028200168.1 RNA-dependent RNA polymerase 1 [Glycine soja] XP_028200177.1 RNA-dependent RNA polymerase 1 [Glycine soja] XP_028200184.1 RNA-dependent RNA polymerase 1 [Glycine soja] KAG4401899.1 hypothetical protein GL…	.	.	0	0	0	0	0	0	0	0	0	0	0	0	0	0	0	0
Am_HQ_1744	4455	XP_004497089.1_50S ribosomal protein L15, chloroplastic [Cicer arietinum]	AT3G25920.1_ribosomal protein L15, GeneName=RPL15	IPR021131_Ribosomal protein L18e/L15P; IPR005749_Ribosomal protein L15, bacterial-type; IPR036227_Ribosomal L18e/L15P superfamily; IPR030878_Ribosomal protein L15	1.74667	2.80333	1.79	1.85333	2.52	0.61	2.11	7.06	0.67	0.68	3.87	0.7	0.8	4.48	0.4	0.68
Am_HQ_1746	4468	PNY15249.1_putative CC-NBS-LRR resistance protein [Trifolium pratense]	AT1G61180.1_LRR and NB-ARC domains-containing disease resistance protein	IPR002182_NB-ARC; IPR027417_P-loop containing nucleoside triphosphate hydrolase	0.63	14.1833	5.55333	6.39	0.82	0.85	0.22	12.51	18.84	11.2	4.35	5.85	6.46	5.59	6.86	6.72
Am_HQ_1748	4466	XP_004510883.1_uncharacterized protein LOC101513656 [Cicer arietinum]	.	IPR000010_Cystatin domain	1.13333	6.57	6.23667	5.52	0.65	2.01	0.74	6.13	7.08	6.5	5.35	6.26	7.1	4.97	5.85	5.74
Am_HQ_1749	4347	TKY53560.1_Nuclear pore complex protein NUP1 [Spatholobus suberectus]	AT3G10650.1_nuclear pore complex protein, GeneName=NUP1	.	45.11	23.08	22.4633	27.4233	57.56	31.71	46.06	24.58	21.22	23.44	19.17	22.03	26.19	24.68	23.1	34.49
Am_HQ_1750	4339	TKY52629.1_TIME FOR COFFEE protein [Spatholobus suberectus]	AT3G22380.3_time for coffee, GeneName=TIC	.	20.5733	7.70333	13.4767	9.03333	19.76	18.81	23.15	7.31	8.51	7.29	10.95	16.04	13.44	9.31	8.44	9.35
Am_HQ_1751	4320	XP_045800464.1_phospholipid-transporting ATPase 1 [Trifolium pratense]	AT5G04930.1_aminophospholipid ATPase 1, GeneName=ALA1	IPR023299_P-type ATPase, cytoplasmic domain N; IPR001757_P-type ATPase; IPR006539_P-type ATPase, subfamily IV; IPR023298_P-type ATPase, transmembrane domain superfamily; IPR008250_P-type ATPase, A domain superfamily; IPR032630_P-type ATPase, C-terminal; IPR032631_P-type ATPase, N-terminal; IPR036412_HAD-like superfamily	20.0967	15.5467	8.88667	22.3	15.06	19.54	25.69	17.94	12.62	16.08	5.02	8.99	12.65	35.73	14.45	16.72
Am_HQ_1753	4285	GAU47870.1_hypothetical protein TSUD_404410 [Trifolium subterraneum]	AT3G63540.1_thylakoid lumenal protein (Mog1/PsbP/DUF1795-like photosystem II reaction center PsbP family protein)	IPR005162_Retrotransposon gag domain	0.27	16.01	9.24	5.72	0.44	0.18	0.19	17.36	15.38	15.29	6.15	10.84	10.73	6.81	5.09	5.26
Am_HQ_1754	4465	XP_027187598.1_TMV resistance protein N-like [Cicer arietinum]	AT5G36930.3_Disease resistance protein (TIR-NBS-LRR class) family	IPR000157_Toll/interleukin-1 receptor homology (TIR) domain; IPR035897_Toll/interleukin-1 receptor homology (TIR) domain superfamily; IPR002182_NB-ARC; IPR027417_P-loop containing nucleoside triphosphate hydrolase	44.2333	17.6967	8.10333	53.8667	8.37	62	62.33	24.5	16.03	12.56	4.28	10.84	9.19	93.34	22.71	45.55
Am_HQ_1755	4467	XP_004486441.1_exocyst complex component SEC8 [Cicer arietinum] XP_004486442.1 exocyst complex component SEC8 [Cicer arietinum]	AT3G10380.2_subunit of exocyst complex 8, GeneName=SEC8	IPR007191_Sec8 exocyst complex component specific domain	1.04	1.52	1.54	1.73667	0.73	1.37	1.02	2.02	1.53	1.01	2.05	1.61	0.96	2.06	1.33	1.82
Am_HQ_1756	4207	XP_045817533.1_uncharacterized protein LOC123910467 [Trifolium pratense]	AT1G22930.1_T-complex protein 11	IPR008862_T-complex 11	26.25	8.91667	16.1167	10.0067	6.32	64.96	7.47	1.94	23.17	1.64	0.88	45.77	1.7	1.2	28.15	0.67
Am_HQ_1757	4415	XP_045799814.1_pumilio homolog 2-like isoform X2 [Trifolium pratense]	AT2G29190.1_pumilio 2, GeneName=PUM2	IPR016024_Armadillo-type fold; IPR001313_Pumilio RNA-binding repeat; IPR012940_Nucleic acid binding NABP	3.83667	10.0433	6.26333	6.57667	3.07	6.21	2.23	10.19	11.05	8.89	3.85	7.5	7.44	7.57	4.91	7.25
Am_HQ_1758	4459	XP_027344205.1_DExH-box ATP-dependent RNA helicase DExH3 [Abrus precatorius]	AT1G48650.1_DEA(D/H)-box RNA helicase family protein	IPR027417_P-loop containing nucleoside triphosphate hydrolase; IPR001650_Helicase, C-terminal; IPR014001_Helicase superfamily 1/2, ATP-binding domain; IPR007502_Helicase-associated domain; IPR011545_DEAD/DEAH box helicase domain; IPR014720_Double-stranded RNA-binding domain; IPR011709_Domain of unknown function DUF1605	3.03333	6.78667	4.15	5.73333	3.8	5.26	0.04	9.64	10.72	0	5.42	7.03	0	9.29	7.91	0
Am_HQ_1760	4454	RDX76768.1_ABC transporter B family member 19, partial [Mucuna pruriens]	AT3G28860.1_ATP binding cassette subfamily B19, GeneName=ABCB19	IPR027417_P-loop containing nucleoside triphosphate hydrolase; IPR036640_ABC transporter type 1, transmembrane domain superfamily; IPR003593_AAA+ ATPase domain; IPR003439_ABC transporter-like, ATP-binding domain; IPR011527_ABC transporter type 1, transmembrane domain	0.0333333	33.66	35.7167	12.2233	0	0.1	0	29.13	43.5	28.35	22.7	45.91	38.54	10.55	15.35	10.77
Am_HQ_1761	4409	XP_004491420.1_splicing factor, suppressor of white-apricot homolog isoform X2 [Cicer arietinum]	AT5G55100.1_SWAP (Suppressor-of-White-APricot)/surp domain-containing protein	IPR000061_SWAP/Surp; IPR035967_SWAP/Surp superfamily	4.73	9.74667	8.06	9.77	6.71	5.82	1.66	10.43	8.65	10.16	4.09	10.07	10.02	8.93	11.46	8.92
Am_HQ_1765	4457	XP_004512760.1_probable serine/threonine protein kinase IREH1 isoform X1 [Cicer arietinum]	AT3G17850.1_Protein kinase superfamily protein	IPR000719_Protein kinase domain; IPR011009_Protein kinase-like domain superfamily	41.2367	36.8933	23.9567	32.71	45.93	38.57	39.21	33.84	41.8	35.04	9.71	28.38	33.78	24.27	36.4	37.46
Am_HQ_1766	4457	GAU11340.1_hypothetical protein TSUD_343310 [Trifolium subterraneum]	AT4G01860.2_Transducin family protein / WD-40 repeat family protein	IPR001680_WD40 repeat; IPR036322_WD40-repeat-containing domain superfamily	2.28667	2.67	3.56667	4.93667	4.36	1.83	0.67	1.92	3.02	3.07	4.01	3.46	3.23	3.07	4.26	7.48
Am_HQ_1768	4409	XP_017436146.1_PREDICTED: probable serine/threonine-protein kinase At1g54610 [Vigna angularis] XP_017436147.1 PREDICTED: probable serine/threonine-protein kinase At1g54610 [Vigna angularis] KAG2395196.1 serine/threonine-protein kinase [Vigna angularis] KOM52919.1 hypothetical protein LR48_Vigan09g157800 [Vigna angularis] BAT88010.1 hypothetical protein VIGAN_05144000 [Vigna angularis var. angular…	AT1G54610.1_Protein kinase superfamily protein	IPR000719_Protein kinase domain; IPR011009_Protein kinase-like domain superfamily	1.77	4.93667	3.11	4.07333	2.32	2.75	0.24	6.85	5.42	2.54	3.9	3.65	1.78	7.24	3.04	1.94
Am_HQ_1772	4388	XP_045787635.1_cyclin-T1-3-like isoform X2 [Trifolium pratense]	AT4G19600.1_Cyclin family protein, GeneName=CYCT1;4	IPR036915_Cyclin-like superfamily; IPR006671_Cyclin, N-terminal; IPR013763_Cyclin-like	3.85333	3.41333	4.68667	4.48667	3.26	6.17	2.13	4.86	0	5.38	4.94	3.58	5.54	5.01	3.41	5.04
Am_HQ_1773	4418	KAG4979341.1_hypothetical protein JHK85_033299 [Glycine max] KAG4984992.1 hypothetical protein JHK86_032683 [Glycine max] KAG5139152.1 hypothetical protein JHK84_032920 [Glycine max] KAH1219901.1 hypothetical protein GmHk_12G033706 [Glycine max]	AT1G05320.1_myosin heavy chain, embryonic smooth protein	.	171.7	51.18	116.09	102.07	185.55	164.48	165.07	56.97	55.44	41.13	63.11	147.06	138.1	80.35	123.44	102.42
Am_HQ_1779	4449	XP_024635237.1_pentatricopeptide repeat-containing protein At4g20740 [Medicago truncatula] AES69154.2 PPR containing plant-like protein [Medicago truncatula] RHN65983.1 putative tetratricopeptide-like helical domain, pentacotripeptide-repeat region of PROPR [Medicago truncatula]	AT4G20740.1_Pentatricopeptide repeat (PPR-like) superfamily protein, GeneName=EMB3131	IPR033443_Pentacotripeptide-repeat region of PRORP; IPR002885_Pentatricopeptide repeat; IPR011990_Tetratricopeptide-like helical domain superfamily	3.59667	4.59667	3.10333	3.87	3.03	4.38	3.38	2.87	7.13	3.79	1.73	3.85	3.73	3.42	4.92	3.27
Am_HQ_1780	4399	XP_004488776.1_uncharacterized protein LOC101511072 [Cicer arietinum] XP_027190914.1 uncharacterized protein LOC101511072 [Cicer arietinum] XP_027190916.1 uncharacterized protein LOC101511072 [Cicer arietinum]	AT1G79570.1_kinase superfamily with octicosapeptide/Phox/Bem1p domain-containing protein	IPR000719_Protein kinase domain; IPR001245_Serine-threonine/tyrosine-protein kinase, catalytic domain; IPR000270_PB1 domain; IPR011009_Protein kinase-like domain superfamily	22.5433	6.40667	5.7	7.53	18.59	23.78	25.26	5.21	7.07	6.94	3.61	5.99	7.5	6.76	6.4	9.43
Am_HQ_1781	4451	KHN21230.1_Retrovirus-related Pol polyprotein from transposon TNT 1-94, partial [Glycine soja]	AT4G23160.3_cysteine-rich RECEPTOR-like kinase, GeneName=CRK8	IPR012337_Ribonuclease H-like superfamily; IPR001584_Integrase, catalytic core	0.0533333	0.103333	0.0266667	0.08	0	0.16	0	0	0.19	0.12	0	0	0.08	0	0.08	0.16
Am_HQ_1784	4401	XP_045828189.1_uncharacterized protein LOC123920098 [Trifolium pratense] PNY04433.1 hypothetical protein L195_g000857 [Trifolium pratense]	AT4G24610.1_pesticidal crystal cry8Ba protein	.	3.48667	3.74667	9.46333	8.81667	2.59	5.39	2.48	2.95	5.42	2.87	8.13	11.07	9.19	7.07	7.6	11.78
Am_HQ_1786	4450	XP_027192505.1_LOW QUALITY PROTEIN: midasin [Cicer arietinum]	AT1G67120.1_midasin-like protein	IPR036465_von Willebrand factor A-like domain superfamily	32.9	39.5033	32.61	56.11	46.51	38.93	13.26	35.43	43.45	39.63	29.19	35.32	33.32	53.36	52.46	62.51
Am_HQ_1788	4450	XP_024637722.1_RNA-binding protein 28 isoform X2 [Medicago truncatula]	AT2G21440.1_RNA-binding (RRM/RBD/RNP motifs) family protein	IPR035979_RNA-binding domain superfamily; IPR000504_RNA recognition motif domain	4.64333	14.6567	10.3233	10.8133	7.49	3.17	3.27	14.41	12.62	16.94	8.81	10.92	11.24	10.79	10.6	11.05
Am_HQ_1793	4444	GAU35107.1_hypothetical protein TSUD_162120 [Trifolium subterraneum]	AT5G17680.2_disease resistance protein (TIR-NBS-LRR class)	IPR035897_Toll/interleukin-1 receptor homology (TIR) domain superfamily; IPR000157_Toll/interleukin-1 receptor homology (TIR) domain	0.02	0	0.01	0.01	0.03	0.03	0	0	0	0	0	0	0.03	0	0	0.03
Am_HQ_1795	4413	XP_004516240.1_uncharacterized protein LOC101506621 [Cicer arietinum]	AT1G79570.1_kinase superfamily with octicosapeptide/Phox/Bem1p domain-containing protein	IPR000270_PB1 domain; IPR001245_Serine-threonine/tyrosine-protein kinase, catalytic domain; IPR011009_Protein kinase-like domain superfamily; IPR000719_Protein kinase domain	27.36	6.50667	11.0267	16.19	24.59	32.39	25.1	6.03	7.92	5.57	10.35	11.27	11.46	14.55	15.71	18.31
Am_HQ_1803	4334	KAG4385169.1_hypothetical protein GLYMA_12G044000v4 [Glycine max]	AT4G34450.1_coatomer gamma-2 subunit, putative / gamma-2 coat protein, putative / gamma-2 COP	IPR002553_Clathrin/coatomer adaptor, adaptin-like, N-terminal; IPR016024_Armadillo-type fold	0.29	0.963333	0.683333	0.86	0.54	0.26	0.07	0.65	1.64	0.6	0.36	0.81	0.88	0.5	0.94	1.14
Am_HQ_1804	4450	XP_045832068.1_putative disease resistance RPP13-like protein 1 [Trifolium pratense]	AT3G14470.1_NB-ARC domain-containing disease resistance protein	IPR002182_NB-ARC; IPR027417_P-loop containing nucleoside triphosphate hydrolase	2.7	4.53667	1.93333	3.23	3.1	2.91	2.09	2.97	6.59	4.05	1.4	2.4	2	2.89	3.53	3.27
Am_HQ_1806	4399	DAD40716.1_TPA_asm: hypothetical protein HUJ06_015039 [Nelumbo nucifera]	.	.	93.8133	226.863	85.5533	132.027	99.03	102.57	79.84	200.61	233.01	246.97	61.44	100.4	94.82	110.52	157.2	128.36
Am_HQ_1808	4441	XP_004492544.1_CBL-interacting protein kinase 18-like [Cicer arietinum]	AT5G58380.1_SOS3-interacting protein 1, GeneName=SIP1	IPR000719_Protein kinase domain; IPR004041_NAF domain; IPR011009_Protein kinase-like domain superfamily	2.48667	0.273333	0.903333	0.166667	2.67	3.62	1.17	0.2	0.34	0.28	0.44	0.7	1.57	0.18	0.17	0.15
Am_HQ_1810	4290	XP_004500736.1_translocase of chloroplast 120, chloroplastic [Cicer arietinum]	AT2G16640.2_multimeric translocon complex in the outer envelope membrane 132, GeneName=TOC132	IPR005690_Translocase of chloroplast Toc86/159; IPR006703_AIG1-type guanine nucleotide-binding (G) domain; IPR024283_Translocase of chloroplast 159/132, membrane anchor domain; IPR027417_P-loop containing nucleoside triphosphate hydrolase	1.21333	3.28333	3.54333	9.75667	0.85	1.47	1.32	2.38	3.53	3.94	2.49	4.06	4.08	8.38	9.09	11.8
Am_HQ_1811	4439	RYR40028.1_hypothetical protein Ahy_A09g045691 isoform B [Arachis hypogaea]	AT3G07170.2_Sterile alpha motif (SAM) domain-containing protein	.	0.656667	1.58667	1.23333	1.61333	0.27	0.54	1.16	1.62	1.67	1.47	0.87	1.25	1.58	1.17	1.86	1.81
Am_HQ_1812	4416	PNY03653.1_hypothetical protein L195_g000060 [Trifolium pratense]	AT5G60150.2_hypothetical protein	.	0.256667	1.78	3.24667	2.08	0.23	0.54	0	0	3.22	2.12	2.13	3.68	3.93	1.35	1.02	3.87
Am_HQ_1813	4416	PNX99941.1_cysteine-rich receptor-like protein kinase, partial [Trifolium pratense]	AT1G43760.1_DNAse I-like superfamily protein	IPR026960_Reverse transcriptase zinc-binding domain; IPR000477_Reverse transcriptase domain; IPR005135_Endonuclease/exonuclease/phosphatase; IPR043502_DNA/RNA polymerase superfamily; IPR036691_Endonuclease/exonuclease/phosphatase superfamily	17.0967	27.8233	26.4567	24.16	19.12	17.15	15.02	32.43	29.35	21.69	32.34	26.02	21.01	23.98	25.84	22.66
Am_HQ_1814	4445	XP_004506315.1_protein OBERON 4 [Cicer arietinum]	AT3G63500.2_fibronectin type III domain protein (DUF1423), GeneName=TTA2	IPR032535_Oberon, coiled-coil region; IPR032881_Oberon, PHD finger domain; IPR004082_Protein OBERON	50.9167	29.6	21.63	37.7133	65.92	39.12	47.71	30.46	31.4	26.94	14.4	27.05	23.44	31.88	44.48	36.78
Am_HQ_1816	4418	XP_004513201.1_serine/threonine-protein kinase TIO [Cicer arietinum]	AT1G50240.2_kinase family with ARM repeat domain-containing protein, GeneName=FU	IPR000357_HEAT repeat; IPR016024_Armadillo-type fold	0.196667	0.38	1.28333	0.876667	0.37	0.06	0.16	0.53	0.44	0.17	1.71	0.94	1.2	0.84	0.35	1.44
Am_HQ_1817	4363	TKY55969.1_Lysine-specific demethylase JMJ25 [Spatholobus suberectus]	AT4G00990.1_Transcription factor jumonji (jmjC) domain-containing protein	IPR018866_Zinc-finger domain of monoamine-oxidase A repressor R1; IPR003347_JmjC domain	6.51333	11.2567	9.13333	22.44	5.07	10.48	3.99	9.48	14.38	9.91	6.33	10.79	10.28	19.33	20.46	27.53
Am_HQ_1818	4453	XP_004495524.1_putative lysine-specific demethylase JMJ16 isoform X1 [Cicer arietinum] XP_012569947.1 putative lysine-specific demethylase JMJ16 isoform X1 [Cicer arietinum]	AT1G08620.3_Transcription factor jumonji (jmj) family protein / zinc finger (C5HC2 type) family protein, GeneName=PKDM7D	IPR004198_Zinc finger, C5HC2-type; IPR003349_JmjN domain; IPR003347_JmjC domain	0.27	1.40667	0.683333	1.07	0	0.38	0.43	1.53	1.55	1.14	0.12	0.57	1.36	1.18	0.97	1.06
Am_HQ_1821	4435	GAU44699.1_hypothetical protein TSUD_24620 [Trifolium subterraneum]	AT3G58050.1_hypothetical protein	.	6.15667	7.43667	11.46	11.6667	4.41	5.9	8.16	5.85	8.91	7.55	8.68	14.22	11.48	10.64	11.01	13.35
Am_HQ_1822	4429	TKY71695.1_DNA-directed RNA polymerase II subunit RPB2 [Spatholobus suberectus]	AT4G21710.1_DNA-directed RNA polymerase family protein, GeneName=NRPB2	IPR007642_RNA polymerase Rpb2, domain 2; IPR007120_DNA-directed RNA polymerase, subunit 2, hybrid-binding domain; IPR007645_RNA polymerase Rpb2, domain 3; IPR007647_RNA polymerase Rpb2, domain 5; IPR007646_RNA polymerase Rpb2, domain 4; IPR007644_RNA	14.22	7.62667	4.11	6.16667	8.53	11.93	22.2	8.07	9.32	5.49	2.85	5.28	4.2	11.12	2.45	4.93
Am_HQ_1827	4423	XP_004513201.1_serine/threonine-protein kinase TIO [Cicer arietinum]	AT1G50240.2_kinase family with ARM repeat domain-containing protein, GeneName=FU	IPR000719_Protein kinase domain; IPR011009_Protein kinase-like domain superfamily	1.22	2.65333	6.04	5.37333	1.7	1.17	0.79	1.52	4.1	2.34	5.66	5.98	6.48	4.18	5.05	6.89
Am_HQ_1828	4436	XP_004491827.1_KH domain-containing protein HEN4-like [Cicer arietinum] XP_004491828.1 KH domain-containing protein HEN4-like [Cicer arietinum] XP_027188777.1 KH domain-containing protein HEN4-like [Cicer arietinum]	AT5G15270.3_RNA-binding KH domain-containing protein	IPR036612_K Homology domain, type 1 superfamily; IPR004087_K Homology domain; IPR004088_K Homology domain, type 1	9.42667	2.47	2.75333	3.81	14.96	7.54	5.78	2.3	3.41	1.7	2.38	3.85	2.03	4.42	4.62	2.39
Am_HQ_1829	4432	TKY52629.1_TIME FOR COFFEE protein [Spatholobus suberectus]	AT3G22380.3_time for coffee, GeneName=TIC	.	10.9467	3.24	5.99333	4.60333	5.72	7.93	19.19	3.16	3.18	3.38	3.54	5.94	8.5	5.77	4.78	3.26
Am_HQ_1831	4386	XP_003550500.1_phospholipase A I isoform X1 [Glycine max] XP_028210417.1 phospholipase A I-like [Glycine soja] KAG4929232.1 hypothetical protein JHK86_046193 [Glycine max] KAH1116226.1 hypothetical protein GYH30_045920 [Glycine max] KRH02092.1 hypothetical protein GLYMA_17G015200v4 [Glycine max] RZB54690.1 Phospholipase A I isoform A [Glycine soja]	AT1G61850.2_phospholipase A I-like protein	IPR016035_Acyl transferase/acyl hydrolase/lysophospholipase; IPR002641_Patatin-like phospholipase domain; IPR001611_Leucine-rich repeat; IPR003591_Leucine-rich repeat, typical subtype; IPR000225_Armadillo; IPR016024_Armadillo-type fold	13.7633	10.19	13.76	14.79	11.16	14.69	15.44	7.85	12.65	10.07	10.81	15.7	14.77	11.52	13.32	19.53
Am_HQ_1836	4348	XP_004509479.1_kinesin-like protein KIN-14E isoform X1 [Cicer arietinum]	AT5G65930.2_kinesin-like calmodulin-binding protein (ZWICHEL), GeneName=ZWI	IPR000857_MyTH4 domain; IPR001752_Kinesin motor domain; IPR035963_FERM superfamily, second domain; IPR011254_Prismane-like superfamily; IPR019749_Band 4.1 domain; IPR019748_FERM central domain; IPR027417_P-loop containing nucleoside triphosphate hydrolase	2.04	5.96	11.6333	8.77	1.2	3.03	1.89	4.48	8.88	4.52	10.71	11.79	12.4	7.64	7.19	11.48
Am_HQ_1838	4425	XP_004504906.1_uncharacterized protein LOC101503310 [Cicer arietinum]	AT1G61690.1_phosphoinositide binding protein	IPR019734_Tetratricopeptide repeat; IPR011990_Tetratricopeptide-like helical domain superfamily	4.82333	5.62333	5.80333	6.98667	7.13	5.44	1.9	6.06	8.86	1.95	7.61	8.49	1.31	9.47	9.42	2.07
Am_HQ_1839	4450	XP_004501461.1_protein IQ-DOMAIN 1 isoform X2 [Cicer arietinum]	AT3G16830.1_TOPLESS-related 2, GeneName=TPR2	.	14	44.54	25.48	21.1567	26.81	6.58	8.61	40.34	52.26	41.02	27.51	23.19	25.74	22.86	19.63	20.98
Am_HQ_1840	4388	XP_003613243.2_RNA-binding protein 25 isoform X1 [Medicago truncatula] AES96201.2 RNA recognition motif protein, putative [Medicago truncatula]	AT1G60200.1_splicing factor PWI domain-containing protein / RNA recognition motif (RRM)-containing protein	IPR002483_PWI domain; IPR036483_PWI domain superfamily	0.85	7.89333	5.23333	6.62333	0.65	1.26	0.64	6.84	7.64	9.2	4.17	6.44	5.09	5.64	9.08	5.15
Am_HQ_1842	4423	XP_012572675.1_homeobox-DDT domain protein RLT2 isoform X8 [Cicer arietinum]	AT5G44180.2_Homeodomain-like transcriptional regulator, GeneName=RLT2	IPR028941_WHIM2 domain; IPR028942_WHIM1 domain	13.3567	14.16	13.2033	18.6433	13.54	16.38	10.15	12.82	15.13	14.53	13.32	13.35	12.94	15.85	19.16	20.92
Am_HQ_1844	4426	XP_004495366.1_uncharacterized protein LOC101504250 [Cicer arietinum] XP_004495367.1 uncharacterized protein LOC101504250 [Cicer arietinum] XP_004495368.1 uncharacterized protein LOC101504250 [Cicer arietinum]	AT5G43230.1_EEIG1/EHBP1 protein amino-terminal domain protein	.	1.87333	1.73	0.82	0.99	0.15	3.22	2.25	1.31	1.28	2.6	0.6	0.46	1.4	1.19	0.61	1.17
Am_HQ_1846	4440	KEH21892.1_F-box/RNI/FBD-like domain protein [Medicago truncatula]	AT2G26200.2_S-adenosyl-L-methionine-dependent methyltransferases superfamily protein	IPR013101_Leucine-rich repeat 2	0.243333	1.19333	1.06	0.683333	0.11	0.5	0.12	0.84	1.73	1.01	0.87	1.48	0.83	0.88	0.74	0.43
Am_HQ_1847	4426	AES64985.1_phytochrome protein B [Medicago truncatula]	AT2G18790.1_phytochrome B, GeneName=PHYB	IPR013515_Phytochrome, central region; IPR003018_GAF domain; IPR013767_PAS fold; IPR036890_Histidine kinase/HSP90-like ATPase superfamily; IPR035965_PAS domain superfamily; IPR000014_PAS domain; IPR003661_Signal transduction histidine kinase, dimerisation/phosphoacceptor domain; IPR036097_Signal transduction histidine kinase, dimerisation/phosphoacceptor domain superfamily; IPR001294_Phytochrome	4.31333	5.53333	5.43667	9.03	3.45	7.07	2.42	5.3	6.66	4.64	3.67	7.45	5.19	6.83	12.03	8.23
Am_HQ_1850	4439	GAU16621.1_hypothetical protein TSUD_233730 [Trifolium subterraneum]	AT3G25990.1_Homeodomain-like superfamily protein	IPR044822_Myb/SANT-like DNA-binding domain 4; IPR001005_SANT/Myb domain	1.3	1.75333	1.13667	1.55	1	1.89	1.01	1.77	1.96	1.53	1	1.56	0.85	1.7	1.26	1.69
Am_HQ_1851	4388	XP_024638667.1_O-fucosyltransferase 29 [Medicago truncatula] AES90897.2 GDP-fucose O-fucosyltransferase-like protein [Medicago truncatula] RHN63230.1 putative GDP-fucose protein O-fucosyltransferase [Medicago truncatula]	AT4G16650.1_O-fucosyltransferase family protein	IPR019378_GDP-fucose protein O-fucosyltransferase	0.02	0.166667	0.243333	0.306667	0.03	0.03	0	0.12	0.14	0.24	0.17	0.31	0.25	0.29	0.34	0.29
Am_HQ_1854	4419	XP_004498554.1_L-arabinokinase-like [Cicer arietinum]	AT4G16130.1_arabinose kinase, GeneName=ARA1	IPR006206_Mevalonate/galactokinase; IPR020568_Ribosomal protein S5 domain 2-type fold; IPR006204_GHMP kinase N-terminal domain; IPR036554_GHMP kinase, C-terminal domain superfamily; IPR013750_GHMP kinase, C-terminal domain	1.79667	6.27333	7.6	2.76667	1.13	0.79	3.47	4.67	7.78	6.37	3.43	9.81	9.56	1.01	3.44	3.85
Am_HQ_1855	4425	KAG4982493.1_hypothetical protein JHK87_027242 [Glycine soja]	AT5G26760.2_RNA polymerase II subunit B1 CTD phosphatase RPAP2-like protein	IPR007308_Rtr1/RPAP2 domain	0.16	0	0	0	0.48	0	0	0	0	0	0	0	0	0	0	0
Am_HQ_1856	4421	XP_019453652.1_PREDICTED: uncharacterized protein LOC109355138 isoform X3 [Lupinus angustifolius]	AT3G20720.2_amino-terminal region of chorein	.	2.74667	14.45	9.01	10.3533	2.22	3.84	2.18	15.38	15.48	12.49	7.2	9.87	9.96	10.29	10.49	10.28
Am_HQ_1857	4413	XP_004491151.1_abscisic-aldehyde oxidase-like [Cicer arietinum]	AT2G27150.1_abscisic aldehyde oxidase 3, GeneName=AAO3	IPR036318_FAD-binding, type PCMH-like superfamily; IPR002888_[2Fe-2S]-binding; IPR008274_Aldehyde oxidase/xanthine dehydrogenase, molybdopterin binding; IPR000674_Aldehyde oxidase/xanthine dehydrogenase, a/b hammerhead; IPR037165_Aldehyde oxidase/xanthine dehydrogenase, molybdopterin binding domain superfamily; IPR005107_CO dehydrogenase flavoprotein, C-terminal; IPR036884_[2Fe-2S]-binding domain…	17.1167	22.46	13.2933	16.09	14.78	20.45	16.12	22.15	27.02	18.21	11.04	13.97	14.87	17.32	17.06	13.89
Am_HQ_1859	4307	XP_027359342.1_tripeptidyl-peptidase 2-like isoform X6 [Abrus precatorius]	AT4G20850.1_tripeptidyl peptidase ii, GeneName=TPP2	IPR000209_Peptidase S8/S53 domain; IPR036852_Peptidase S8/S53 domain superfamily	0.0833333	1.29333	3.08	1.3	0.15	0.1	0	1.06	1.21	1.61	5.41	1.98	1.85	2.03	1.41	0.46
Am_HQ_1862	4416	XP_012572460.2_dynamin-related protein 3A-like [Cicer arietinum]	AT4G33650.1_dynamin-related protein 3A, GeneName=DRP3A	IPR000375_Dynamin stalk domain; IPR001401_Dynamin, GTPase domain; IPR045063_Dynamin, N-terminal; IPR003130_Dynamin GTPase effector; IPR022812_Dynamin; IPR027417_P-loop containing nucleoside triphosphate hydrolase	3.09	6.22	6.90333	5.77667	2.39	3.07	3.81	4.35	5.28	9.03	6.06	5.35	9.3	4.81	4.53	7.99
Am_HQ_1864	4401	TKY49703.1_F-box protein [Spatholobus suberectus]	AT3G54460.1_SNF2 domain-containing protein / helicase domain-containing protein / F-box family protein	IPR001810_F-box domain; IPR027417_P-loop containing nucleoside triphosphate hydrolase; IPR011124_Zinc finger, CW-type; IPR001650_Helicase, C-terminal; IPR036047_F-box-like domain superfamily; IPR014001_Helicase superfamily 1/2, ATP-binding domain; IPR000330_SNF2, N-terminal	8.13	12.03	8.25667	7.78333	8.54	8.73	7.12	10.38	14.45	11.26	6.04	9.76	8.97	6.57	7.52	9.26
Am_HQ_1869	4406	XP_004492708.1_K(+) efflux antiporter 2, chloroplastic-like [Cicer arietinum]	AT4G00630.1_K+ efflux antiporter 2, GeneName=KEA2	IPR006153_Cation/H+ exchanger; IPR004771_K+/H+ exchanger	2.73667	8.2	2.69667	3.03	0.59	4.29	3.33	11.53	9.09	3.98	2.32	2.78	2.99	3.1	3.05	2.94
Am_HQ_1872	4409	XP_027360379.1_formin-like protein 14 [Abrus precatorius]	AT1G31810.1_Formin Homology 14, GeneName=AFH14	IPR029021_Protein-tyrosine phosphatase-like; IPR035892_C2 domain superfamily; IPR015425_Formin, FH2 domain; IPR014020_Tensin phosphatase, C2 domain	1.59	10.73	6.27667	6.36	0.88	1.95	1.94	9.85	12.18	10.16	4.5	7.18	7.15	4.9	6.82	7.36
Am_HQ_1874	4320	XP_028197084.1_DIS3-like exonuclease 2 [Glycine soja] RZB71427.1 DIS3-like exonuclease 2 isoform B [Glycine soja]	AT1G77680.1_Ribonuclease II/R family protein	IPR028591_DIS3-like exonuclease 2; IPR001900_Ribonuclease II/R; IPR012340_Nucleic acid-binding, OB-fold; IPR041505_Dis3-like cold-shock domain 2	20.4933	10.1433	20.7033	11.3833	22.49	26.12	12.87	9.37	12.4	8.66	18.7	22.6	20.81	7.89	11.96	14.3
Am_HQ_1875	4395	XP_045799965.1_probable phospholipid-transporting ATPase 4 [Trifolium pratense] XP_045799966.1 probable phospholipid-transporting ATPase 4 [Trifolium pratense]	AT1G17500.1_ATPase E1-E2 type family protein / haloacid dehalogenase-like hydrolase family protein	IPR023299_P-type ATPase, cytoplasmic domain N; IPR032630_P-type ATPase, C-terminal; IPR006539_P-type ATPase, subfamily IV; IPR023298_P-type ATPase, transmembrane domain superfamily; IPR036412_HAD-like superfamily; IPR001757_P-type ATPase; IPR032631_P-type ATPase, N-terminal; IPR008250_P-type ATPase, A domain superfamily	40.88	34.39	39.6667	26.0967	27.86	52.26	42.52	33.6	38.34	31.23	27.43	45.48	46.09	25.66	24.08	28.55
Am_HQ_1879	4381	RHN66204.1_putative wall-associated receptor kinase, galacturonan-binding domain-containing protein [Medicago truncatula]	.	IPR025287_Wall-associated receptor kinase, galacturonan-binding domain	0.02	1.30333	0.596667	0.0166667	0.03	0.03	0	1.88	1.94	0.09	0	1.62	0.17	0	0	0.05
Am_HQ_1881	4363	XP_045800405.1_protein FORGETTER 1-like isoform X1 [Trifolium pratense]	AT1G79350.1_RING/FYVE/PHD zinc finger superfamily protein, GeneName=EMB1135	IPR026937_Strawberry notch, helicase C domain; IPR011011_Zinc finger, FYVE/PHD-type; IPR027417_P-loop containing nucleoside triphosphate hydrolase; IPR039187_Strawberry notch, AAA domain; IPR001965_Zinc finger, PHD-type	23.2433	14.2067	13.0767	12.6767	26.24	21.67	21.82	9.59	16.48	16.55	6.45	16.33	16.45	8.16	13.51	16.36
Am_HQ_1882	4397	RHN42090.1_putative RNA-directed DNA polymerase [Medicago truncatula]	AT4G23160.3_cysteine-rich RECEPTOR-like kinase, GeneName=CRK8	IPR036875_Zinc finger, CCHC-type superfamily	0.5	0.283333	0.306667	2.72	0.15	1.29	0.06	0.1	0.71	0.04	0.2	0.55	0.17	0.55	7.5	0.11
Am_HQ_1884	4405	MCH80675.1_hypothetical protein [Trifolium medium]	.	.	0	0.15	0.173333	0.01	0	0	0	0.2	0.14	0.11	0.14	0.16	0.22	0	0.03	0
Am_HQ_1891	4404	GAU40960.1_hypothetical protein TSUD_187170 [Trifolium subterraneum]	AT5G05800.2_Myb/SANT-like DNA-binding domain protein	.	0.156667	0.846667	0.986667	2.23	0.19	0.05	0.23	0.7	0.07	1.77	1.39	0.09	1.48	2.86	0.09	3.74
Am_HQ_1892	4429	XP_014518263.1_splicing factor 3B subunit 1 [Vigna radiata var. radiata]	AT5G64270.1_splicing factor	IPR016024_Armadillo-type fold; IPR015016_Splicing factor 3B subunit 1	5.33	9.77333	9.71	12.6733	6.06	8.68	1.25	7.23	18.71	3.38	9.59	15.26	4.28	9.67	21.39	6.96
Am_HQ_1893	4405	XP_004512863.1_DENN domain and WD repeat-containing protein SCD1 isoform X2 [Cicer arietinum]	AT1G49040.1_stomatal cytokinesis defective / SCD1 protein (SCD1), GeneName=SCD1	IPR005112_dDENN domain; IPR001194_cDENN domain; IPR036322_WD40-repeat-containing domain superfamily; IPR001680_WD40 repeat; IPR005113_uDENN domain; IPR020472_G-protein beta WD-40 repeat	8.82	21.4733	21.2933	31.0833	4.26	17.73	4.47	13.42	25.32	25.68	18.16	23.52	22.2	23.57	32.05	37.63
Am_HQ_1894	4429	XP_012568428.1_mediator of RNA polymerase II transcription subunit 16-like isoform X4 [Cicer arietinum] XP_027186076.1 mediator of RNA polymerase II transcription subunit 16-like isoform X4 [Cicer arietinum]	AT4G04920.2_sensitive to freezing 6, GeneName=SFR6	.	14.77	16.6867	12.3433	27.9633	16.49	17.46	10.36	15.71	11.9	22.45	17.55	8.63	10.85	36.5	24.2	23.19
Am_HQ_1895	4385	PNY14086.1_zinc finger protein, partial [Trifolium pratense]	AT3G18290.1_zinc finger protein-like protein, GeneName=BTS	IPR012312_Hemerythrin-like	5.8	6.53333	8.55333	6.44	6.26	2.64	8.5	5.89	7.18	6.53	7.21	9.09	9.36	5.47	7.34	6.51
Am_HQ_1897	4403	TKY64314.1_hypothetical protein E2542_SST14207 [Spatholobus suberectus]	AT4G26060.1_Ribosomal protein L18ae family	.	2.08333	4.28	2.72333	3.73667	2.03	3.16	1.06	3.1	5.93	3.81	1.03	4.52	2.62	3.16	5.69	2.36
Am_HQ_1898	4227	XP_027330861.1_phytochrome A [Abrus precatorius] XP_027331703.1 phytochrome A [Abrus precatorius] XP_027332528.1 phytochrome A [Abrus precatorius] XP_027333314.1 phytochrome A [Abrus precatorius]	AT1G09570.3_phytochrome A, GeneName=PHYA	IPR003661_Signal transduction histidine kinase, dimerisation/phosphoacceptor domain; IPR035965_PAS domain superfamily; IPR012129_Phytochrome A/B/C/D/E; IPR000014_PAS domain; IPR013515_Phytochrome, central region; IPR003018_GAF domain; IPR013767_PAS fold; IPR003594_Histidine kinase/HSP90-like ATPase; IPR013654_PAS fold-2; IPR036890_Histidine kinase/HSP90-like ATPase superfamily; IPR001294_Phytochr…	61.2267	15.2067	35.03	40.6433	58.14	91.86	33.68	14.71	17.41	13.5	25.82	38.24	41.03	39.67	39.6	42.66
Am_HQ_1899	4401	XP_004504003.1_uncharacterized protein LOC101511453 isoform X1 [Cicer arietinum]	AT4G39420.4_spatacsin carboxy-terminus protein	.	15.27	7.71333	5.49333	6.83333	18.28	12.44	15.09	7.5	8.74	6.9	0.89	7.25	8.34	4.04	7.23	9.23
Am_HQ_1900	4405	XP_027339790.1_mediator of RNA polymerase II transcription subunit 15a isoform X2 [Abrus precatorius]	AT1G15780.1_mediator of RNA polymerase II transcription subunit 15a-like protein, GeneName=NRB4	IPR036546_Mediator complex subunit 15, KIX domain; IPR036529_Coactivator CBP, KIX domain superfamily	56.65	31.6567	36.5967	28.4333	65.15	41.2	63.6	28.95	39.43	26.59	30.88	44.26	34.65	23.91	32.84	28.55
Am_HQ_1903	4341	TKY52407.1_ABC transporter B family member 4 [Spatholobus suberectus]	AT2G47000.5_ATP binding cassette subfamily B4, GeneName=ABCB4	IPR003439_ABC transporter-like, ATP-binding domain; IPR027417_P-loop containing nucleoside triphosphate hydrolase; IPR036640_ABC transporter type 1, transmembrane domain superfamily; IPR003593_AAA+ ATPase domain; IPR011527_ABC transporter type 1, transmembrane domain	57.8933	21.5633	33.8	26.3333	32.38	64.24	77.06	20.94	18.8	24.95	16.97	43.13	41.3	31.37	24.59	23.04
Am_HQ_1907	4346	MCH82052.1_retrovirus-related Pol polyprotein from transposon TNT 1-94 [Trifolium medium]	AT5G25060.1_RNA recognition motif (RRM)-containing protein, GeneName=RRC1	.	0.223333	0.21	0.263333	0.27	0.21	0.16	0.3	0.18	0.24	0.21	0	0.31	0.48	0.13	0.28	0.4
Am_HQ_1909	4406	KAG2398134.1_Cellulose synthase-like protein [Vigna angularis] BAT91203.1 hypothetical protein VIGAN_06251600 [Vigna angularis var. angularis]	AT3G03050.1_cellulose synthase-like D3, GeneName=CSLD3	IPR005150_Cellulose synthase; IPR029044_Nucleotide-diphospho-sugar transferases	0.82	0.756667	1.01667	1.63667	0.39	1.13	0.94	0.57	0.76	0.94	0.95	1.39	0.71	3.58	1.04	0.29
Am_HQ_1910	4394	GAU24718.1_hypothetical protein TSUD_355470 [Trifolium subterraneum]	AT3G16270.1_ENTH/VHS family protein	IPR013809_ENTH domain; IPR002014_VHS domain; IPR008942_ENTH/VHS	0.276667	0.273333	0.306667	0.206667	0.05	0.73	0.05	0	0.77	0.05	0.22	0.65	0.05	0	0.62	0
Am_HQ_1912	4395	XP_045804586.1_disease resistance protein RPV1-like isoform X2 [Trifolium pratense] XP_045804587.1 disease resistance protein RPV1-like isoform X2 [Trifolium pratense]	AT5G36930.3_Disease resistance protein (TIR-NBS-LRR class) family	IPR027417_P-loop containing nucleoside triphosphate hydrolase; IPR000157_Toll/interleukin-1 receptor homology (TIR) domain; IPR035897_Toll/interleukin-1 receptor homology (TIR) domain superfamily; IPR002182_NB-ARC; IPR036390_Winged helix DNA-binding domain superfamily	9.16667	8.60667	8.12667	10.2033	7.12	6.78	13.6	9.21	8.41	8.2	7.8	10.82	5.76	13.53	8.33	8.75
Am_HQ_1913	4397	XP_045804570.1_leucine-rich repeat receptor-like serine/threonine-protein kinase At1g17230 [Trifolium pratense]	AT1G17230.1_Leucine-rich receptor-like protein kinase family protein	IPR000719_Protein kinase domain; IPR001611_Leucine-rich repeat; IPR011009_Protein kinase-like domain superfamily; IPR013210_Leucine-rich repeat-containing N-terminal, plant-type; IPR003591_Leucine-rich repeat, typical subtype	8.15333	3.41	3.03667	9.84333	5.4	11.68	7.38	2.91	3.75	3.57	1.37	3.67	4.07	12.86	7.93	8.74
Am_HQ_1916	4306	XP_020230029.1_DEAD-box ATP-dependent RNA helicase 42 [Cajanus cajan]	AT1G20920.5_P-loop containing nucleoside triphosphate hydrolases superfamily protein	IPR014001_Helicase superfamily 1/2, ATP-binding domain; IPR027417_P-loop containing nucleoside triphosphate hydrolase; IPR011545_DEAD/DEAH box helicase domain; IPR001650_Helicase, C-terminal	31.5533	30.4767	22.8833	31.0033	32.94	27.09	34.63	29.85	32.64	28.94	15.26	27.38	26.01	24.43	34.23	34.35
Am_HQ_1919	4285	GAU30267.1_hypothetical protein TSUD_384880 [Trifolium subterraneum]	AT2G34090.1_maternal effect embryo arrest 18, GeneName=MEE18	IPR002882_2-phospho-L-lactate transferase CofD; IPR038136_CofD-like domain superfamily	0.783333	2.09667	1.57667	1.97667	1.16	0.82	0.37	1.39	3.75	1.15	1.34	2.19	1.2	2	2.52	1.41
Am_HQ_1923	4384	QCD96519.1_hypothetical protein DEO72_LG6g1223 [Vigna unguiculata]	.	.	2.23	11.16	17.44	9.26	0.45	0.77	5.47	22.49	5.28	5.71	4.54	28.58	19.2	21	2.23	4.55
Am_HQ_1924	4387	XP_004497722.1_arginine/serine-rich coiled-coil protein 2 isoform X2 [Cicer arietinum]	AT3G56720.1_pre-mRNA-splicing factor	IPR028124_Small acidic protein-like domain	6.62333	6.18333	3.58	5.39667	10.82	3.64	5.41	6.97	4.83	6.75	3.26	3.34	4.14	5.31	4.22	6.66
Am_HQ_1925	4393	PRQ42077.1_putative RNA-directed DNA polymerase [Rosa chinensis]	AT4G23160.3_cysteine-rich RECEPTOR-like kinase, GeneName=CRK8	IPR012337_Ribonuclease H-like superfamily; IPR001584_Integrase, catalytic core; IPR043502_DNA/RNA polymerase superfamily; IPR013103_Reverse transcriptase, RNA-dependent DNA polymerase	5.35667	3.90333	4.06667	3.70667	5.8	3.63	6.64	3.15	4.48	4.08	4.82	4.44	2.94	1.84	5.15	4.13
Am_HQ_1927	4419	RZC27363.1_Protein ENHANCED DOWNY MILDEW 2 isoform D [Glycine soja]	AT5G55390.3_ENHANCED DOWNY MILDEW 2, GeneName=EDM2	IPR022702_DNA (cytosine-5)-methyltransferase 1, replication foci domain; IPR001965_Zinc finger, PHD-type	0.246667	2.02	1.72	2.61667	0.47	0.27	0	3.7	1.66	0.7	1.61	2.34	1.21	2.14	2.97	2.74
Am_HQ_1928	4382	XP_020240540.1_NPC intracellular cholesterol transporter 1 isoform X1 [Cajanus cajan]	AT4G38350.1_Patched family protein	IPR004765_NPC1-like; IPR032190_Niemann-Pick C1, N-terminal; IPR003392_Protein patched/dispatched	14.8033	33.1	30.6567	19.6333	10.82	18.73	14.86	13.55	45.44	40.31	32.71	29.08	30.18	22.67	19.79	16.44
Am_HQ_1932	4404	XP_013470429.1_elongator complex protein 1 isoform X2 [Medicago truncatula] KEH44467.1 elongator complex protein [Medicago truncatula]	AT5G13680.1_IKI3 family protein, GeneName=ABO1	IPR006849_Elongator complex protein 1	15.05	20.4933	18.3967	27.12	18.09	18.48	8.58	15.71	22.18	23.59	12.91	17.46	24.82	17.93	24.06	39.37
Am_HQ_1934	4306	XP_004514820.1_DNA repair protein UVH3 isoform X1 [Cicer arietinum]	AT3G28030.2_5'-3' exonuclease family protein, GeneName=UVH3	IPR036279_5'-3' exonuclease, C-terminal domain superfamily; IPR029060_PIN-like domain superfamily; IPR001044_XPG/Rad2 endonuclease, eukaryotes; IPR006085_XPG, N-terminal; IPR006086_XPG-I domain; IPR025527_HUWE1/Rev1, ubiquitin binding region; IPR006084_XPG/Rad2 endonuclease; IPR008918_Helix-hairpin-helix motif, class 2	9.07667	8.94667	8.96	8.73667	9.53	9.61	8.09	8.53	10.31	8	4.36	10.68	11.84	6.91	9.08	10.22
Am_HQ_1935	4420	XP_004509738.1_ABC transporter B family member 2-like [Cicer arietinum]	AT4G25960.1_P-glycoprotein 2, GeneName=ABCB2	IPR003593_AAA+ ATPase domain; IPR003439_ABC transporter-like, ATP-binding domain; IPR011527_ABC transporter type 1, transmembrane domain; IPR036640_ABC transporter type 1, transmembrane domain superfamily; IPR027417_P-loop containing nucleoside triphosphate hydrolase	1.79667	2.61333	1.73333	3.20333	2.04	2.45	0.9	2.39	3.6	1.85	0.87	2.47	1.86	2.37	3.23	4.01
Am_HQ_1936	4391	BBG96384.1_ADP glucose pyrophosphorylase large subunit 1 [Prunus dulcis]	AT4G23160.3_cysteine-rich RECEPTOR-like kinase, GeneName=CRK8	IPR013103_Reverse transcriptase, RNA-dependent DNA polymerase; IPR043502_DNA/RNA polymerase superfamily	0.853333	2.34667	1.87667	1.79667	0.55	0.97	1.04	2.17	2.59	2.28	1.87	1.76	2	1.45	1.89	2.05
Am_HQ_1937	4370	XP_013459108.1_protein LONGIFOLIA 1 [Medicago truncatula] KEH33161.1 longifolia protein [Medicago truncatula] RHN66092.1 putative protein LONGIFOLIA 1/2 [Medicago truncatula]	AT1G74160.1_LONGIFOLIA protein, GeneName=TRM4	IPR032795_DUF3741-associated sequence motif; IPR025486_Domain of unknown function DUF4378	7.30333	5.46	16.2367	3.65333	3.87	9.07	8.97	4.04	8.26	4.08	16.99	18.27	13.45	3.93	2.75	4.28
Am_HQ_1939	4392	TKY54706.1_Formin protein 13 [Spatholobus suberectus]	AT5G58160.1_actin binding protein	IPR014020_Tensin phosphatase, C2 domain; IPR029021_Protein-tyrosine phosphatase-like; IPR015425_Formin, FH2 domain; IPR035892_C2 domain superfamily	9.93	17.1067	16.5533	6.18333	5.71	7.11	16.97	15.41	17.24	18.67	12.83	20.32	16.51	5.18	7.14	6.23
Am_HQ_1940	4390	XP_027349607.1_DNA mismatch repair protein MSH6 [Abrus precatorius]	AT4G02070.2_MUTS homolog 6, GeneName=MSH6	IPR000432_DNA mismatch repair protein MutS, C-terminal; IPR007861_DNA mismatch repair protein MutS, clamp; IPR036678_MutS, connector domain superfamily; IPR007696_DNA mismatch repair protein MutS, core; IPR007860_DNA mismatch repair protein MutS, connector domain; IPR036187_DNA mismatch repair protein MutS, core domain superfamily; IPR027417_P-loop containing nucleoside triphosphate hydrolase; IP…	1.59333	5.93667	4.78333	7.49	1.59	1.88	1.31	5.48	6.66	5.67	3.55	4.8	6	5.66	8.11	8.7
Am_HQ_1945	4314	RDX97424.1_hypothetical protein CR513_19805, partial [Mucuna pruriens]	.	.	7.83333	10.47	12.1867	13.0733	5.1	11.87	6.53	11.51	10.87	9.03	9.46	15.04	12.06	10.94	12.93	15.35
Am_HQ_1947	4326	KAG4960604.1_hypothetical protein JHK87_037237 [Glycine soja] KAG4978001.1 hypothetical protein JHK86_037475 [Glycine max] KAH1103347.1 hypothetical protein GYH30_037354 [Glycine max]	AT5G64420.1_DNA polymerase V family	IPR007015_DNA polymerase V/Myb-binding protein 1A; IPR016024_Armadillo-type fold	26.1467	13.6267	11.2833	18.7	32.34	21.25	24.85	13.75	15.09	12.04	10.63	10.39	12.83	17.14	15.99	22.97
Am_HQ_1948	4276	KHN21230.1_Retrovirus-related Pol polyprotein from transposon TNT 1-94, partial [Glycine soja]	AT4G23160.3_cysteine-rich RECEPTOR-like kinase, GeneName=CRK8	IPR013103_Reverse transcriptase, RNA-dependent DNA polymerase; IPR043502_DNA/RNA polymerase superfamily	0.296667	2.3	2.34667	2.02	0.21	0.47	0.21	2	2.43	2.47	2.93	2.21	1.9	1.9	2.02	2.14
Am_HQ_1950	4384	XP_004487433.1_kinesin-like protein KIN-12E [Cicer arietinum]	AT3G44050.1_P-loop containing nucleoside triphosphate hydrolases superfamily protein	.	0	0.203333	1.3	0.633333	0	0	0	0.12	0.34	0.15	1.79	1.05	1.06	0.4	0.24	1.26
Am_HQ_1951	4278	XP_004486114.1_mediator of RNA polymerase II transcription subunit 33A isoform X2 [Cicer arietinum]	AT3G23590.1_REF4-related 1, GeneName=RFR1	.	3.13	4.62	7.03	5.97333	4.01	3.77	1.61	5.59	5.52	2.75	3.98	5.84	11.27	5.52	3.29	9.11
Am_HQ_1952	4372	TKY47886.1_SNF2 domain-containing protein CLASSY 3 [Spatholobus suberectus]	AT2G16390.1_SNF2 domain-containing protein / helicase domain-containing protein, GeneName=DRD1	IPR000330_SNF2, N-terminal; IPR027417_P-loop containing nucleoside triphosphate hydrolase; IPR001650_Helicase, C-terminal; IPR014001_Helicase superfamily 1/2, ATP-binding domain	0.866667	1.10667	0.853333	1.30333	0.46	1.72	0.42	1.51	1.26	0.55	0.61	0.99	0.96	2.1	0.79	1.02
Am_HQ_1956	4386	XP_045817533.1_uncharacterized protein LOC123910467 [Trifolium pratense]	AT1G22930.1_T-complex protein 11	IPR008862_T-complex 11	6.50667	1.84	1.69	2.21667	7.33	1.37	10.82	2.64	1.33	1.55	1.19	1.73	2.15	3.73	1.48	1.44
Am_HQ_1960	4414	.	.	.	0	0	0	0	0	0	0	0	0	0	0	0	0	0	0	0
Am_HQ_1961	4339	PNX76879.1_pentatricopeptide repeat-containing protein [Trifolium pratense]	AT5G65820.1_Pentatricopeptide repeat (PPR) superfamily protein	IPR011990_Tetratricopeptide-like helical domain superfamily; IPR002885_Pentatricopeptide repeat	10.6567	8.05667	9.33333	8.19	13.07	15.11	3.79	7.08	14.49	2.6	8.56	15.97	3.47	8.1	15.06	1.41
Am_HQ_1962	4373	XP_003599596.1_putative disease resistance RPP13-like protein 1 [Medicago truncatula] AES69847.1 NB-ARC domain disease resistance protein, putative [Medicago truncatula] RHN66441.1 putative P-loop containing nucleoside triphosphate hydrolase, leucine-rich repeat domain, L [Medicago truncatula]	AT3G14470.1_NB-ARC domain-containing disease resistance protein	IPR002182_NB-ARC; IPR041118_Rx, N-terminal; IPR027417_P-loop containing nucleoside triphosphate hydrolase	5.72333	5.85333	3.77	7.65667	7.08	4.5	5.59	5.62	7.51	4.43	2.47	4.85	3.99	6.75	9.09	7.13
Am_HQ_1963	4388	PNY09106.1_putative LRR receptor-like protein kinase [Trifolium pratense]	AT2G33170.1_Leucine-rich repeat receptor-like protein kinase family protein	IPR001611_Leucine-rich repeat; IPR013210_Leucine-rich repeat-containing N-terminal, plant-type; IPR000719_Protein kinase domain; IPR003591_Leucine-rich repeat, typical subtype; IPR011009_Protein kinase-like domain superfamily	11.59	6.42333	7.12667	8.96	6.95	16.05	11.77	4.34	8.71	6.22	4.02	9.76	7.6	5.58	10.57	10.73
Am_HQ_1964	4391	MCI20347.1_hypothetical protein [Trifolium medium]	AT1G53345.1_DHHA1 domain protein	IPR036026_Seven-hairpin glycosidases	5.23667	9.69	10.5867	11.1433	8.13	5.15	2.43	10.9	7.11	11.06	8.43	7.76	15.57	11.24	7.94	14.25
Am_HQ_1968	4331	QCD78108.1_structure-specific endonuclease subunit SLX1 [Vigna unguiculata]	AT2G37320.1_Tetratricopeptide repeat (TPR)-like superfamily protein	IPR002885_Pentatricopeptide repeat; IPR011990_Tetratricopeptide-like helical domain superfamily	1.46333	2.11333	1.26333	1.96	1.42	2.77	0.2	2.59	3.21	0.54	1.25	1.48	1.06	1.86	2.56	1.46
Am_HQ_1969	4374	KEH30741.1_disease resistance protein (TIR-NBS-LRR class), putative [Medicago truncatula]	AT5G17680.1_disease resistance protein (TIR-NBS-LRR class)	IPR002182_NB-ARC; IPR027417_P-loop containing nucleoside triphosphate hydrolase; IPR035897_Toll/interleukin-1 receptor homology (TIR) domain superfamily; IPR011713_Leucine-rich repeat 3; IPR000157_Toll/interleukin-1 receptor homology (TIR) domain	9.43	4.21	2.94667	6.02333	13.5	7.81	6.98	3.69	5.48	3.46	2.49	2.74	3.61	5.92	6.37	5.78
Am_HQ_1970	4361	KAF1884619.1_hypothetical protein Lal_00028500 [Lupinus albus]	AT1G62020.1_Coatomer, alpha subunit	IPR006692_Coatomer, WD associated region; IPR010714_Coatomer, alpha subunit, C-terminal	28.3033	33.53	33.3933	37.4467	33.82	26.11	24.98	29.53	40.66	30.4	27.23	36.19	36.76	30.88	39.2	42.26
Am_HQ_1971	4416	XP_004496667.1_protein GFS12 [Cicer arietinum]	AT5G18525.1_protein serine/threonine kinase	IPR036372_BEACH domain superfamily; IPR000409_BEACH domain; IPR011009_Protein kinase-like domain superfamily	10.5567	7.21667	8.87667	7.06333	11.06	9.08	11.53	6.62	6.62	8.41	12.47	7.01	7.15	10.24	4.77	6.18
Am_HQ_1972	4380	XP_012572159.1_uncharacterized protein At4g10930 isoform X3 [Cicer arietinum]	AT4G10930.2_RING/U-box protein	IPR011011_Zinc finger, FYVE/PHD-type; IPR001841_Zinc finger, RING-type; IPR019787_Zinc finger, PHD-finger; IPR001965_Zinc finger, PHD-type	1.37667	2.96333	2.39	3.11333	0.77	1.4	1.96	2.59	3.92	2.38	1.83	2.82	2.52	1.93	3.95	3.46
Am_HQ_1973	4380	XP_004511418.2_stromal processing peptidase, chloroplastic [Cicer arietinum]	AT5G42390.1_Insulinase (Peptidase family M16) family protein, GeneName=SPP	IPR011249_Metalloenzyme, LuxS/M16 peptidase-like; IPR007863_Peptidase M16, C-terminal; IPR011765_Peptidase M16, N-terminal	38.9	125.297	58.2833	43.89	42.24	39.41	35.05	132.49	110.23	133.17	36.33	65.15	73.37	43.48	35.22	52.97
Am_HQ_1975	4386	.	.	.	3.06333	4.37333	3.89333	5.09667	3	3.19	3	3.17	5.42	4.53	4.2	3.73	3.75	4.24	5.79	5.26
Am_HQ_1978	4378	XP_004513027.1_protein phosphatase 2C and cyclic nucleotide-binding/kinase domain-containing protein [Cicer arietinum]	AT2G20050.2_protein phosphatase 2C and cyclic nucleotide-binding/kinase domain-containing protein	IPR001932_PPM-type phosphatase domain; IPR036457_PPM-type phosphatase domain superfamily	0.13	0.54	1.68	0.71	0.16	0.17	0.06	0.41	0.56	0.65	1.75	1.61	1.68	0.98	1.06	0.09
Am_HQ_1981	4362	XP_027358677.1_probable phospholipid-transporting ATPase 8 [Abrus precatorius]	AT3G27870.1_ATPase E1-E2 type family protein / haloacid dehalogenase-like hydrolase family protein	IPR008250_P-type ATPase, A domain superfamily; IPR032631_P-type ATPase, N-terminal; IPR032630_P-type ATPase, C-terminal; IPR006539_P-type ATPase, subfamily IV; IPR036412_HAD-like superfamily; IPR023298_P-type ATPase, transmembrane domain superfamily; IPR023299_P-type ATPase, cytoplasmic domain N; IPR001757_P-type ATPase	3.51	11.9233	11.18	17.2	2.89	5.57	2.07	10.33	14.12	11.32	7.14	13.78	12.62	17.95	17.08	16.57
Am_HQ_1983	4403	XP_045830269.1_structural maintenance of chromosomes protein 3-like [Trifolium pratense] XP_045830270.1 structural maintenance of chromosomes protein 3-like [Trifolium pratense]	AT2G27170.1_Structural maintenance of chromosomes (SMC) family protein, GeneName=TTN7	.	2.47667	5.83333	3.45333	8.93667	1	4.88	1.55	4.24	7.48	5.78	2.45	3.94	3.97	6.33	10.9	9.58
Am_HQ_1987	4147	XP_012569981.1_C2 and GRAM domain-containing protein At1g03370-like [Cicer arietinum]	AT1G03370.1_C2 calcium/lipid-binding and GRAM domain containing protein	IPR031968_VASt domain; IPR000008_C2 domain; IPR035892_C2 domain superfamily; IPR004182_GRAM domain	36.9833	12.5333	9.92667	18.6633	20.16	40.27	50.52	11.39	13.02	13.19	6.34	10.97	12.47	22.27	15.26	18.46
Am_HQ_1988	4288	RHN58016.1_putative P-loop containing nucleoside triphosphate hydrolase, leucine-rich repeat domain, L [Medicago truncatula]	AT3G14470.1_NB-ARC domain-containing disease resistance protein	IPR041118_Rx, N-terminal; IPR027417_P-loop containing nucleoside triphosphate hydrolase; IPR002182_NB-ARC	9.79	29.3267	16.5833	23.1333	4.44	14.84	10.09	31.07	27.36	29.55	11.58	19.71	18.46	31.46	20.53	17.41
Am_HQ_1989	4320	XP_045827615.1_YTH domain-containing protein ECT4 isoform X4 [Trifolium pratense] XP_045827616.1 YTH domain-containing protein ECT4 isoform X4 [Trifolium pratense]	AT3G13060.3_evolutionarily conserved C-terminal region 5, GeneName=ECT5	IPR007275_YTH domain	1.71333	4.73333	3.05667	4.59	0.96	2.82	1.36	5.16	4.47	4.57	1.55	3.86	3.76	4.98	4.31	4.48
Am_HQ_1990	4349	PNX72910.1_RNA-binding (RRM/RBD/RNP motif) family protein [Trifolium pratense]	AT3G15010.2_RNA-binding (RRM/RBD/RNP motifs) family protein	IPR000504_RNA recognition motif domain; IPR035979_RNA-binding domain superfamily	5.26333	6.31667	4.11333	5.27333	5.8	9.82	0.17	4.81	13.83	0.31	2.59	9.19	0.56	4.31	10.82	0.69
Am_HQ_1995	4420	XP_012567955.1_histone acetyltransferase HAC1-like [Cicer arietinum]	AT1G79000.3_histone acetyltransferase of the CBP family 1, GeneName=HAC1	.	0	0	0	0	0	0	0	0	0	0	0	0	0	0	0	0
Am_HQ_1997	4373	GAU20110.1_hypothetical protein TSUD_140100, partial [Trifolium subterraneum]	AT3G23590.1_REF4-related 1, GeneName=RFR1	.	1.75	5.74667	19.73	9.14667	0.95	1.51	2.79	5.59	5.62	6.03	14.82	26.05	18.32	5.68	11.76	10
Am_HQ_1998	4315	PNY06843.1_small subunit processome component-like protein [Trifolium pratense]	AT5G14880.1_Potassium transporter family protein	.	0.146667	0.71	0.543333	0	0.44	0	0	0.06	2.07	0	0	0.23	1.4	0	0	0
Am_HQ_1999	4374	XP_004487927.1_histone-lysine N-methyltransferase ATXR7 isoform X4 [Cicer arietinum]	AT5G42400.2_SET domain protein 25, GeneName=SDG25	IPR001214_SET domain; IPR003616_Post-SET domain; IPR035445_GYF-like domain superfamily	16.29	11.4467	8.09667	11.4067	24.53	13.35	10.99	9.89	14.22	10.23	3.79	10.86	9.64	8.01	14.37	11.84
Am_HQ_2000	4371	XP_020240540.1_NPC intracellular cholesterol transporter 1 isoform X1 [Cajanus cajan]	AT4G38350.1_Patched family protein	IPR004765_NPC1-like; IPR032190_Niemann-Pick C1, N-terminal; IPR003392_Protein patched/dispatched	8.53667	10.5767	10.1467	12.89	11.01	9.9	4.7	24.45	5.18	2.1	0	14	16.44	4.85	13.11	20.71
Am_HQ_2001	4324	XP_004502055.1_HEAT repeat-containing protein 6 [Cicer arietinum]	AT4G38120.3_ARM repeat superfamily protein	IPR016024_Armadillo-type fold; IPR025283_Domain of unknown function DUF4042	13.7033	12.8033	12.4233	17.9133	17.21	15.18	8.72	11.97	14.24	12.2	11	13.6	12.67	17.34	17.84	18.56
Am_HQ_2002	4324	XP_004504906.1_uncharacterized protein LOC101503310 [Cicer arietinum]	AT1G61690.1_phosphoinositide binding protein	IPR011011_Zinc finger, FYVE/PHD-type; IPR000306_FYVE zinc finger; IPR011990_Tetratricopeptide-like helical domain superfamily; IPR019734_Tetratricopeptide repeat	11.52	12.23	12.8333	12.1467	8.43	7.9	18.23	9.83	10.9	15.96	7.97	13.02	17.51	9.02	11.54	15.88
Am_HQ_2004	4313	XP_020212070.1_phosphatidylinositol 4-kinase gamma 5 isoform X1 [Cajanus cajan]	AT2G03890.1_phosphoinositide 4-kinase gamma 7, GeneName=PI4K GAMMA 7	IPR000403_Phosphatidylinositol 3-/4-kinase, catalytic domain	1.31333	1.52	1.31667	3.15	1.07	1.73	1.14	0.86	2.67	1.03	0.42	1.65	1.88	0.95	6.21	2.29
Am_HQ_2008	4338	RVW82526.1_Retrovirus-related Pol polyprotein from transposon TNT 1-94 [Vitis vinifera]	AT4G23160.3_cysteine-rich RECEPTOR-like kinase, GeneName=CRK8	IPR043502_DNA/RNA polymerase superfamily	1.92333	6.93667	7.7	4.23	1.63	4.13	0.01	6.9	7.36	6.55	8	8.84	6.26	2.02	5.17	5.5
Am_HQ_2012	4290	PRQ42077.1_putative RNA-directed DNA polymerase [Rosa chinensis]	AT4G23160.3_cysteine-rich RECEPTOR-like kinase, GeneName=CRK8	IPR012337_Ribonuclease H-like superfamily; IPR013103_Reverse transcriptase, RNA-dependent DNA polymerase; IPR043502_DNA/RNA polymerase superfamily	2.82333	3.13	2.41	3.10667	3.59	4.88	0	4.35	5.04	0	2.2	5.03	0	3.85	5.47	0
Am_HQ_2014	4328	XP_020215882.1_cellulose synthase A catalytic subunit 2 [UDP-forming] [Cajanus cajan] KYP67815.1 Cellulose synthase A catalytic subunit 6 [UDP-forming] [Cajanus cajan]	AT4G39350.1_cellulose synthase A2, GeneName=CESA2	IPR005150_Cellulose synthase; IPR029044_Nucleotide-diphospho-sugar transferases; IPR027934_Cellulose synthase, RING-type zinc finger	95.7967	92.3767	98.5433	125.967	73.7	114.1	99.59	84.4	100.85	91.88	56.08	121.49	118.06	136.09	106.8	135.01
Am_HQ_2015	4368	GAU42577.1_hypothetical protein TSUD_302930 [Trifolium subterraneum]	AT3G14172.3_GPI-anchored adhesin-like protein	.	1.22	1.47333	1.11667	2.02667	0.5	0.9	2.26	1.54	1.43	1.45	1.2	1.12	1.03	2.42	1.7	1.96
Am_HQ_2016	4369	XP_027331080.1_SNF2 domain-containing protein CLASSY 2-like isoform X1 [Abrus precatorius] XP_027331082.1 SNF2 domain-containing protein CLASSY 2-like isoform X1 [Abrus precatorius] XP_027331083.1 SNF2 domain-containing protein CLASSY 2-like isoform X1 [Abrus precatorius]	AT5G20420.1_chromatin remodeling 42, GeneName=CHR42	IPR000330_SNF2, N-terminal; IPR027417_P-loop containing nucleoside triphosphate hydrolase; IPR001650_Helicase, C-terminal; IPR014001_Helicase superfamily 1/2, ATP-binding domain	1.78333	6.64333	4.57333	10.2133	0.9	3.76	0.69	4.58	9.28	6.07	3.23	5.42	5.07	10.62	9.43	10.59
Am_HQ_2017	4318	CAN83990.1_hypothetical protein VITISV_018454 [Vitis vinifera]	AT4G23160.3_cysteine-rich RECEPTOR-like kinase, GeneName=CRK8	IPR013103_Reverse transcriptase, RNA-dependent DNA polymerase; IPR043502_DNA/RNA polymerase superfamily	3.18333	4.14333	3.58667	4.00333	6.49	2.38	0.68	2.38	5.52	4.53	3.1	3.45	4.21	2.84	5.5	3.67
Am_HQ_2023	4364	KAH1235775.1_hypothetical protein GmHk_08G021165 [Glycine max]	AT4G10890.1_DDE family endonuclease	.	0.16	0.1	0.12	0.0733333	0.08	0.21	0.19	0.1	0.12	0.08	0.07	0.06	0.23	0.11	0.03	0.08
Am_HQ_2024	4295	XP_027340503.1_protein ENHANCED DOWNY MILDEW 2 isoform X2 [Abrus precatorius]	AT5G55390.3_ENHANCED DOWNY MILDEW 2, GeneName=EDM2	IPR022702_DNA (cytosine-5)-methyltransferase 1, replication foci domain; IPR001965_Zinc finger, PHD-type	5.14333	10.7333	11.26	11.28	4.82	6.09	4.52	9.94	12.58	9.68	10.39	12.11	11.28	9.2	10.41	14.23
Am_HQ_2026	4364	XP_004495407.1_pyruvate kinase isozyme A, chloroplastic [Cicer arietinum]	AT3G22960.1_Pyruvate kinase family protein, GeneName=PKP-ALPHA	IPR015793_Pyruvate kinase, barrel; IPR015813_Pyruvate/Phosphoenolpyruvate kinase-like domain superfamily; IPR011037_Pyruvate kinase-like, insert domain superfamily; IPR001697_Pyruvate kinase	0.25	0.66	0.326667	0.593333	0.31	0.24	0.2	0.43	0.74	0.81	0.17	0.31	0.5	0.42	0.63	0.73
Am_HQ_2028	4286	PNX57676.1_LRR receptor-like kinase resistance protein, partial [Trifolium pratense]	AT4G08850.2_Leucine-rich repeat receptor-like protein kinase family protein	IPR001611_Leucine-rich repeat; IPR013210_Leucine-rich repeat-containing N-terminal, plant-type; IPR003591_Leucine-rich repeat, typical subtype; IPR011009_Protein kinase-like domain superfamily; IPR000719_Protein kinase domain	0.06	1.18333	0.92	2.37	0.11	0.07	0	1.73	0.94	0.88	0.68	1.05	1.03	2.93	2.66	1.52
Am_HQ_2029	4375	GAU33571.1_hypothetical protein TSUD_359490, partial [Trifolium subterraneum]	AT2G46900.1_transcription factor-like protein	.	0.296667	0.55	0.74	0.51	0.14	0.52	0.23	0.42	0.58	0.65	0.38	0.97	0.87	0.27	0.6	0.66
Am_HQ_2032	4360	XP_045811751.1_TMV resistance protein N-like [Trifolium pratense]	AT5G36930.3_Disease resistance protein (TIR-NBS-LRR class) family	IPR035897_Toll/interleukin-1 receptor homology (TIR) domain superfamily; IPR000157_Toll/interleukin-1 receptor homology (TIR) domain; IPR027417_P-loop containing nucleoside triphosphate hydrolase; IPR003593_AAA+ ATPase domain; IPR003591_Leucine-rich repeat, typical subtype; IPR002182_NB-ARC	10.84	6.08667	4.15667	9.97667	13.74	6.59	12.19	6.06	5.76	6.44	2.78	4.78	4.91	9.62	10.75	9.56
Am_HQ_2033	4314	TKY52407.1_ABC transporter B family member 4 [Spatholobus suberectus]	AT2G47000.5_ATP binding cassette subfamily B4, GeneName=ABCB4	IPR027417_P-loop containing nucleoside triphosphate hydrolase; IPR003439_ABC transporter-like, ATP-binding domain; IPR003593_AAA+ ATPase domain; IPR011527_ABC transporter type 1, transmembrane domain; IPR036640_ABC transporter type 1, transmembrane domain superfamily	0.69	0.836667	1.49	2.20667	0.1	1.67	0.3	0.2	1.28	1.03	0.97	2.08	1.42	1.48	2.52	2.62
Am_HQ_2034	4357	XP_004490290.1_HD domain-containing protein C4G3.17 [Cicer arietinum]	AT1G26160.2_Metal-dependent phosphohydrolase	.	3.96667	5.13667	3.28	4.51333	4.95	3.82	3.13	5.05	4.87	5.49	1.89	3.88	4.07	3.68	4.79	5.07
Am_HQ_2035	4382	XP_004493187.1_uncharacterized protein LOC101515516 [Cicer arietinum] XP_012569218.1 uncharacterized protein LOC101515516 [Cicer arietinum] XP_012569219.1 uncharacterized protein LOC101515516 [Cicer arietinum] XP_027188553.1 uncharacterized protein LOC101515516 [Cicer arietinum]	AT3G03790.2_ankyrin repeat family protein / regulator of chromosome condensation (RCC1) family protein	IPR000408_Regulator of chromosome condensation, RCC1; IPR002110_Ankyrin repeat; IPR009091_Regulator of chromosome condensation 1/beta-lactamase-inhibitor protein II; IPR036770_Ankyrin repeat-containing domain superfamily	6.68667	22.1133	17.7267	9.99	3.11	5.72	11.23	24	14.78	27.56	11.34	14.97	26.87	7.61	7.13	15.23
Am_HQ_2043	4224	XP_012570569.1_uncharacterized protein PFB0765w [Cicer arietinum] XP_012570570.1 uncharacterized protein PFB0765w [Cicer arietinum] XP_012570571.1 uncharacterized protein PFB0765w [Cicer arietinum]	AT1G20970.1_calponin-like domain protein	.	54.97	19.64	54.6833	37.1733	39.62	57.8	67.49	13.61	22.29	23.02	65.21	50.73	48.11	30.42	31.2	49.9
Am_HQ_2044	4355	XP_027353853.1_probable ubiquitin-like-specific protease 2B isoform X3 [Abrus precatorius]	AT1G09730.2_Cysteine proteinases superfamily protein	IPR003653_Ulp1 protease family, C-terminal catalytic domain; IPR038765_Papain-like cysteine peptidase superfamily	0.493333	1.31	0.36	1.24	0.56	0.41	0.51	1.7	0.62	1.61	0.14	0.41	0.53	1.43	0.83	1.46
Am_HQ_2051	4258	XP_027190613.1_phosphatidylinositol 4-kinase beta 1 isoform X3 [Cicer arietinum]	AT5G64070.2_phosphatidylinositol 4-OH kinase beta1, GeneName=PI-4KBETA1	IPR016024_Armadillo-type fold	0.913333	0.0866667	0.0933333	0.16	0.1	0.96	1.68	0.21	0	0.05	0.04	0	0.24	0.09	0.22	0.17
Am_HQ_2052	4255	XP_027343313.1_vacuolar sorting protein 18 isoform X1 [Abrus precatorius] XP_027343320.1 vacuolar sorting protein 18 isoform X1 [Abrus precatorius]	AT1G12470.1_zinc ion binding protein	.	0	0	0	0	0	0	0	0	0	0	0	0	0	0	0	0
Am_HQ_2054	4350	XP_004496435.1_protein GIGANTEA isoform X1 [Cicer arietinum] XP_012570136.1 protein GIGANTEA isoform X1 [Cicer arietinum]	AT1G22770.1_gigantea protein (GI), GeneName=GI	IPR026211_GIGANTEA	26.0433	77.9667	69.3067	71.55	28.74	35.15	14.24	74.02	79.64	80.24	55.72	76.97	75.23	72.79	71.2	70.66
Am_HQ_2055	4333	XP_027928435.1_uncharacterized protein LOC114185113 isoform X1 [Vigna unguiculata] XP_027928436.1 uncharacterized protein LOC114185113 isoform X1 [Vigna unguiculata] XP_027928437.1 uncharacterized protein LOC114185113 isoform X1 [Vigna unguiculata] XP_027928438.1 uncharacterized protein LOC114185113 isoform X1 [Vigna unguiculata] QCE11619.1 hypothetical protein DEO72_LG10g2854 [Vigna unguiculata]	AT3G24740.4_cellulose synthase, putative (DUF1644)	IPR012866_Protein of unknown function DUF1644	2.82667	8.75667	6.70667	4.71667	0.89	3.62	3.97	5.21	6.39	14.67	3.27	5.78	11.07	2.83	3.26	8.06
Am_HQ_2056	4339	XP_027329331.1_auxin response factor 19-like isoform X1 [Abrus precatorius]	AT1G19220.1_auxin response factor 19, GeneName=ARF19	IPR033389_AUX/IAA domain; IPR015300_DNA-binding pseudobarrel domain superfamily; IPR003340_B3 DNA binding domain; IPR010525_Auxin response factor domain	16.2033	16.9833	46.7367	25.7767	9.67	29.12	9.82	16.54	24.21	10.2	42.4	70.41	27.4	22.55	28.41	26.37
Am_HQ_2057	4368	AES69403.1_pentatricopeptide (PPR) repeat protein [Medicago truncatula]	AT1G16480.1_Tetratricopeptide repeat (TPR)-like superfamily protein	IPR032867_DYW domain; IPR002885_Pentatricopeptide repeat	7.15667	7.07667	5.28	8.97	8.61	7.87	4.99	7.76	7.29	6.18	2.92	6.25	6.67	8.3	8.12	10.49
Am_HQ_2059	4339	TKY71695.1_DNA-directed RNA polymerase II subunit RPB2 [Spatholobus suberectus]	AT4G21710.1_DNA-directed RNA polymerase family protein, GeneName=NRPB2	IPR007644_RNA polymerase, beta subunit, protrusion; IPR007642_RNA polymerase Rpb2, domain 2; IPR007120_DNA-directed RNA polymerase, subunit 2, hybrid-binding domain; IPR007647_RNA polymerase Rpb2, domain 5; IPR007645_RNA polymerase Rpb2, domain 3; IPR007646_RNA polymerase Rpb2, domain 4	54.9933	23.1133	20.16	25.06	43.3	63.48	58.2	28.08	23.77	17.49	15.84	24.08	20.56	17.6	27.42	30.16
Am_HQ_2060	4340	TKY59464.1_5-oxoprolinase protein [Spatholobus suberectus]	AT5G37830.1_oxoprolinase 1, GeneName=OXP1	IPR003692_Hydantoinase B/oxoprolinase	8.34	8.56667	8.83333	8.67	7.34	8.98	8.7	8.86	8.15	8.69	4.46	10.86	11.18	7.04	9.52	9.45
Am_HQ_2062	4290	XP_004495517.1_nuclear pore complex protein NUP98A isoform X2 [Cicer arietinum]	AT1G10390.2_Nucleoporin autopeptidase	IPR007230_Peptidase S59, nucleoporin; IPR036903_Peptidase S59, nucleoporin superfamily	22.9967	3.86667	6.71	5.00333	7.39	9.27	52.33	4.12	4.44	3.04	4.21	8.11	7.81	7.33	3.23	4.45
Am_HQ_2065	4282	KEH24043.1_protein phosphatase 2A regulatory B subunit family protein [Medicago truncatula]	AT3G09880.1_Protein phosphatase 2A regulatory B subunit family protein, GeneName=ATB' BETA	IPR002554_Protein phosphatase 2A, regulatory B subunit, B56; IPR016024_Armadillo-type fold	0.87	1.54333	1.87333	1.96	0.62	1.18	0.81	1.57	1.86	1.2	1.4	2.31	1.91	1.13	2.63	2.12
Am_HQ_2068	4310	XP_004488475.1_uncharacterized protein LOC101503892 [Cicer arietinum]	AT3G29760.3_Haloacid dehalogenase-like hydrolase (HAD) superfamily protein	IPR036412_HAD-like superfamily; IPR004274_FCP1 homology domain	15.9567	18.4967	11.9367	19.9933	19.53	13.65	14.69	19.19	19.96	16.34	8.28	13.42	14.11	18.02	22.04	19.92
Am_HQ_2069	4300	XP_027351657.1_uncharacterized protein LOC113862716 isoform X1 [Abrus precatorius]	AT4G01290.2_chorismate synthase	.	19.67	30.52	20.4767	36.36	18.49	23.52	17	29.07	31.79	30.7	5.67	31.2	24.56	24.61	32.86	51.61
Am_HQ_2072	4346	RHN42090.1_putative RNA-directed DNA polymerase [Medicago truncatula]	AT4G23160.3_cysteine-rich RECEPTOR-like kinase, GeneName=CRK8	IPR043502_DNA/RNA polymerase superfamily; IPR013103_Reverse transcriptase, RNA-dependent DNA polymerase	0.863333	1.26667	1.84	3.02333	0.29	1.03	1.27	0.65	2.32	0.83	2.28	1.31	1.93	0.44	7.59	1.04
Am_HQ_2077	4343	XP_024640338.1_FT-interacting protein 7 [Medicago truncatula] AES94060.1 calcium-dependent lipid-binding (CaLB domain) family protein [Medicago truncatula] RHN53600.1 putative C2 domain, phosphoribosyltransferase [Medicago truncatula]	AT4G11610.1_C2 calcium/lipid-binding plant phosphoribosyltransferase family protein	IPR035892_C2 domain superfamily; IPR000008_C2 domain	0.31	2.14	0.903333	1.63	0.28	0.55	0.1	2.07	2.24	2.11	0.65	1.06	1	1.36	2.04	1.49
Am_HQ_2080	4341	XP_027334834.1_UPF0481 protein At3g47200-like [Abrus precatorius]	AT2G44930.1_transmembrane protein, putative (DUF247)	IPR012438_Protein of unknown function DUF1639	32.33	17.1267	12.4633	13.1567	66.09	2.95	27.95	22.38	5.06	23.94	17.21	4.72	15.46	19	5.73	14.74
Am_HQ_2081	4309	KAG4378044.1_hypothetical protein GLYMA_18G255000v4 [Glycine max]	AT5G15070.4_Phosphoglycerate mutase-like family protein	IPR029033_Histidine phosphatase superfamily; IPR000560_Histidine phosphatase superfamily, clade-2	0.276667	1.36667	0.233333	0.446667	0.62	0	0.21	1.23	1.69	1.18	0.16	0.17	0.37	1.05	0	0.29
Am_HQ_2082	4339	PNY00009.1_E3 ubiquitin-protein ligase bre1-like protein 2-like protein, partial [Trifolium pratense]	AT1G55250.5_histone mono-ubiquitination 2, GeneName=HUB2	.	0.47	0.446667	0.496667	0.63	0.51	0.45	0.45	0.27	0.96	0.11	0.16	0.62	0.71	0.49	0.51	0.89
Am_HQ_2083	4307	RDX58346.1_Protein EMBRYONIC FLOWER 1, partial [Mucuna pruriens]	AT5G11530.2_embryonic flower 1 (EMF1), GeneName=EMF1	.	8.4	6.04	7.65	7.54	10.71	6.68	7.81	6.12	5.75	6.25	6.09	8.86	8	6.96	7.34	8.32
Am_HQ_2084	4287	KAG4979341.1_hypothetical protein JHK85_033299 [Glycine max] KAG4984992.1 hypothetical protein JHK86_032683 [Glycine max] KAG5139152.1 hypothetical protein JHK84_032920 [Glycine max] KAH1219901.1 hypothetical protein GmHk_12G033706 [Glycine max]	AT1G05320.1_myosin heavy chain, embryonic smooth protein	.	0.01	0	0	0	0	0	0.03	0	0	0	0	0	0	0	0	0
Am_HQ_2085	4340	XP_045799814.1_pumilio homolog 2-like isoform X2 [Trifolium pratense]	AT2G29190.1_pumilio 2, GeneName=PUM2	IPR012940_Nucleic acid binding NABP; IPR001313_Pumilio RNA-binding repeat; IPR016024_Armadillo-type fold	23.17	41.02	41.3967	54.8267	28.19	29.58	11.74	32.79	49.44	40.83	28.39	46.29	49.51	38.92	60.89	64.67
Am_HQ_2088	4329	XP_004493785.1_putative lysine-specific demethylase JMJ16 [Cicer arietinum] XP_004493786.1 putative lysine-specific demethylase JMJ16 [Cicer arietinum]	AT1G08620.2_Transcription factor jumonji (jmj) family protein / zinc finger (C5HC2 type) family protein, GeneName=PKDM7D	IPR004198_Zinc finger, C5HC2-type; IPR003349_JmjN domain; IPR003347_JmjC domain	0.41	1.34	0.7	0.77	0.33	0.69	0.21	1.06	1.07	1.89	0	0.99	1.11	0.73	0.61	0.97
Am_HQ_2094	4331	XP_004510296.1_homeobox-leucine zipper protein ATHB-15-like isoform X1 [Cicer arietinum]	AT1G52150.1_Homeobox-leucine zipper family protein / lipid-binding START domain-containing protein, GeneName=ATHB-15	IPR009057_Homeobox-like domain superfamily; IPR001356_Homeobox domain; IPR002913_START domain	12.56	3.47	4.13333	18.9	0.38	36.97	0.33	0.46	9.43	0.52	0.56	11.4	0.44	0.62	55.81	0.27
Am_HQ_2097	4344	PNX72162.1_methyltransferase-like protein 1-like, partial [Trifolium pratense] PNX72451.1 methyltransferase-like protein 1-like, partial [Trifolium pratense]	AT4G09980.2_Methyltransferase MT-A70 family protein, GeneName=EMB1691	.	10.9633	1.65667	0.993333	11.1967	6.57	17.4	8.92	2.31	1.08	1.58	0.36	1.2	1.42	8.82	11.66	13.11
Am_HQ_2100	4338	KAF4386364.1_hypothetical protein F8388_019991, partial [Cannabis sativa]	AT3G18480.1_CCAAT-displacement protein alternatively spliced product, GeneName=CASP	.	4.86333	24.7367	19.4833	11.6733	5.1	4.43	5.06	20.8	19.41	34	11.21	16.67	30.57	12.21	8.42	14.39
Am_HQ_2101	4264	TKY54264.1_Flowering time control protein FCA [Spatholobus suberectus]	AT4G16280.4_flowering time control protein FCA, GeneName=FCA	IPR000504_RNA recognition motif domain; IPR035979_RNA-binding domain superfamily; IPR036020_WW domain superfamily; IPR001202_WW domain	5.48333	6.31	6.15667	10.2733	5.01	9.15	2.29	5.84	8.14	4.95	5.52	7.86	5.09	8.8	10.89	11.13
Am_HQ_2103	4340	XP_014624945.1_ABC transporter B family member 4 isoform X1 [Glycine max] XP_028209040.1 ABC transporter B family member 4-like isoform X1 [Glycine soja] XP_028209042.1 ABC transporter B family member 4-like isoform X1 [Glycine soja] KAG4932222.1 hypothetical protein JHK87_046224 [Glycine soja] KAH1116685.1 hypothetical protein GYH30_046199 [Glycine max] KRH02482.1 hypothetical protein GLYMA_17G0…	AT2G47000.5_ATP binding cassette subfamily B4, GeneName=ABCB4	IPR027417_P-loop containing nucleoside triphosphate hydrolase; IPR011527_ABC transporter type 1, transmembrane domain; IPR003439_ABC transporter-like, ATP-binding domain; IPR036640_ABC transporter type 1, transmembrane domain superfamily; IPR003593_AAA+ ATPase domain	0.493333	0.36	0.833333	1.55333	0.35	0.75	0.38	0.74	0.26	0.08	0.32	1.33	0.85	1.58	1.25	1.83
Am_HQ_2106	4332	XP_004505648.1_isoleucine--tRNA ligase, cytoplasmic [Cicer arietinum]	AT4G10320.1_tRNA synthetase class I (I, L, M and V) family protein	IPR002301_Isoleucine-tRNA ligase; IPR002300_Aminoacyl-tRNA synthetase, class Ia; IPR009008_Valyl/Leucyl/Isoleucyl-tRNA synthetase, editing domain	0.553333	0.386667	0.463333	0.4	1.15	0.35	0.16	0.67	0	0.49	0.83	0.19	0.37	0.42	0.18	0.6
Am_HQ_2109	4148	XP_012574930.1_protein PLASTID MOVEMENT IMPAIRED 1-RELATED 1-like [Cicer arietinum]	AT5G20610.1_EEIG1/EHBP1 protein amino-terminal domain protein	IPR018392_LysM domain; IPR019448_NT-type C2 domain	3.49667	15.32	9.49333	6.61333	2.78	4.45	3.26	13.07	16.95	15.94	8	9.27	11.21	5.98	6.74	7.12
Am_HQ_2110	4330	XP_012569165.1_uncharacterized protein At2g33490-like isoform X3 [Cicer arietinum] XP_012569166.1 uncharacterized protein At2g33490-like isoform X3 [Cicer arietinum]	AT2G33490.3_hydroxyproline-rich glycoprotein family protein	IPR027267_AH/BAR domain superfamily	1.51667	2.32333	1.06333	1.20333	0.89	1.15	2.51	1.59	2.99	2.39	0.14	1.53	1.52	1.43	1.06	1.12
Am_HQ_2111	4331	MCH80527.1_peptide transporter PTR2 [Trifolium medium]	AT4G23160.3_cysteine-rich RECEPTOR-like kinase, GeneName=CRK8	IPR001584_Integrase, catalytic core; IPR012337_Ribonuclease H-like superfamily	1.74667	5.53	2.93667	4.08333	2.12	1.84	1.28	6.23	4.86	5.5	2.11	2.55	4.15	4.31	3.59	4.35
Am_HQ_2113	4329	XP_004491420.1_splicing factor, suppressor of white-apricot homolog isoform X2 [Cicer arietinum]	AT5G55100.1_SWAP (Suppressor-of-White-APricot)/surp domain-containing protein	IPR000061_SWAP/Surp; IPR035967_SWAP/Surp superfamily	0.35	3.00333	2.74333	1.92667	0.67	0.38	0	1.5	4.88	2.63	0.93	2.46	4.84	2.49	1.06	2.23
Am_HQ_2116	4332	XP_004497981.1_uncharacterized protein LOC101496762 isoform X1 [Cicer arietinum]	AT5G43310.2_COP1-interacting protein-like protein	.	1.22667	3.17	10.13	5.17	0.79	2.24	0.65	2.53	4.52	2.46	12.31	9.36	8.72	5.65	3.87	5.99
Am_HQ_2121	4326	KYP45237.1_Retrotransposable element Tf2 [Cajanus cajan]	AT1G73060.1_Low PSII Accumulation 3, GeneName=LPA3	IPR005162_Retrotransposon gag domain; IPR021109_Aspartic peptidase domain superfamily	1.78667	3.31667	2.21333	1.95	1.67	1.75	1.94	3.03	4.34	2.58	1.24	2.5	2.9	1.73	1.68	2.44
Am_HQ_2122	4327	XP_004504314.1_importin-5 [Cicer arietinum]	AT5G19820.1_ARM repeat superfamily protein, GeneName=emb2734	IPR034085_TOG domain; IPR041653_Importin repeat 4; IPR016024_Armadillo-type fold; IPR041389_Importin repeat 6; IPR001494_Importin-beta, N-terminal domain	2.21	2.33333	2.16667	1.62667	1.36	3.07	2.2	1.73	3.31	1.96	3.91	1.1	1.49	1.67	2.06	1.15
Am_HQ_2125	4337	RDX83503.1_Transcriptional corepressor SEUSS, partial [Mucuna pruriens]	AT1G43850.1_SEUSS transcriptional co-regulator, GeneName=SEU	IPR029005_LIM-domain binding protein/SEUSS	6.73667	5.63333	6.14333	7.76333	6.88	6.54	6.79	4	7.16	5.74	4.27	7.27	6.89	8.36	7.48	7.45
Am_HQ_2126	4318	XP_020212181.1_U-box domain-containing protein 3 isoform X3 [Cajanus cajan]	AT3G54790.2_ARM repeat superfamily protein	IPR003613_U-box domain	0	0.0933333	0.09	0.0966667	0	0	0	0.1	0.12	0.06	0.04	0.14	0.09	0.15	0.07	0.07
Am_HQ_2128	4328	XP_004498592.1_uncharacterized protein LOC101490286 [Cicer arietinum]	AT2G19160.1_Core-2/I-branching beta-1,6-N-acetylglucosaminyltransferase family protein	.	0.456667	0.84	1.57667	1.08333	0.26	0.86	0.25	0.6	1.16	0.76	1.05	2.02	1.66	1.4	0.73	1.12
Am_HQ_2132	4323	PNX96338.1_phosphatidylinositol 4-kinase type 2-beta [Trifolium pratense] PNY10312.1 phosphatidylinositol 4-kinase type 2-beta [Trifolium pratense]	AT2G03890.1_phosphoinositide 4-kinase gamma 7, GeneName=PI4K GAMMA 7	IPR000403_Phosphatidylinositol 3-/4-kinase, catalytic domain	11.12	13.04	10.31	15.3433	14.76	18.29	0.31	19.36	17.75	2.01	14.22	15.79	0.92	23.98	20.85	1.2
Am_HQ_2135	4207	KYP68927.1_hypothetical protein KK1_022577 [Cajanus cajan]	AT1G10410.1_CW14 protein (DUF1336)	.	1.16	3.42667	2.69667	1.98333	0.92	1.68	0.88	3.17	4.35	2.76	1.95	3.64	2.5	1.56	2.21	2.18
Am_HQ_2136	4293	XP_004491419.1_protein suppressor of white apricot isoform X1 [Cicer arietinum]	AT5G55100.1_SWAP (Suppressor-of-White-APricot)/surp domain-containing protein	IPR000061_SWAP/Surp; IPR035967_SWAP/Surp superfamily	3.62333	4.32667	2.94	3.62	4.74	4.2	1.93	5.36	5.06	2.56	2	3.6	3.22	2.59	5.09	3.18
Am_HQ_2140	4291	.	.	.	0	0	0	0	0	0	0	0	0	0	0	0	0	0	0	0
Am_HQ_2141	4323	XP_004503754.1_uncharacterized protein LOC101511357 [Cicer arietinum]	AT5G52230.1_methyl-CPG-binding domain protein 13, GeneName=MBD13	IPR001739_Methyl-CpG DNA binding; IPR016177_DNA-binding domain superfamily	59.4867	51.7467	52.51	35.2633	81.44	45.71	51.31	50.54	52.19	52.51	48.51	57.28	51.74	34.99	36.38	34.42
Am_HQ_2144	4244	MCH93889.1_enzymatic polyprotein [Trifolium medium]	.	.	0	0	0	0	0	0	0	0	0	0	0	0	0	0	0	0
Am_HQ_2146	4315	XP_004506226.1_serine/threonine-protein phosphatase BSL3 [Cicer arietinum] XP_004506227.1 serine/threonine-protein phosphatase BSL3 [Cicer arietinum] XP_012572830.1 serine/threonine-protein phosphatase BSL3 [Cicer arietinum]	AT2G27210.1_BRI1 suppressor 1 (BSU1)-like 3, GeneName=BSL3	IPR012391_Serine/threonine protein phosphatase, BSU1; IPR015915_Kelch-type beta propeller; IPR011498_Kelch repeat type 2; IPR029052_Metallo-dependent phosphatase-like; IPR006186_Serine/threonine-specific protein phosphatase/bis(5-nucleosyl)-tetraphosphatase; IPR004843_Calcineurin-like phosphoesterase domain, ApaH type	6.81667	13.6767	13.6433	14.2933	5.98	8.03	6.44	14.69	14.06	12.28	15.06	13.93	11.94	14.41	14.54	13.93
Am_HQ_2153	4061	XP_004504314.1_importin-5 [Cicer arietinum]	AT5G19820.1_ARM repeat superfamily protein, GeneName=emb2734	IPR016024_Armadillo-type fold; IPR000357_HEAT repeat; IPR001494_Importin-beta, N-terminal domain; IPR041389_Importin repeat 6; IPR034085_TOG domain; IPR041653_Importin repeat 4	131.537	49.1767	53.15	71.0367	143.78	120.17	130.66	48.44	51.41	47.68	36.01	62.19	61.25	54.14	73.88	85.09
Am_HQ_2154	4294	XP_045795186.1_disease resistance protein RPV1 isoform X2 [Trifolium pratense]	AT1G27170.1_transmembrane receptors / ATP binding protein	IPR003591_Leucine-rich repeat, typical subtype; IPR006553_Leucine-rich repeat, cysteine-containing subtype	0.786667	4.02333	5.13667	6.75667	0.93	0.71	0.72	2.58	4.46	5.03	4.54	3.95	6.92	5.06	5.9	9.31
Am_HQ_2163	4311	XP_003550600.1_zinc finger CCHC domain-containing protein 10 [Glycine max] XP_028211312.1 zinc finger CCHC domain-containing protein 10-like [Glycine soja] KAG4929394.1 hypothetical protein JHK86_046355 [Glycine max] KAG4932130.1 hypothetical protein JHK87_046132 [Glycine soja] KAG4942259.1 hypothetical protein JHK85_046905 [Glycine max] KAG5096602.1 hypothetical protein JHK82_046456 [Glycine max…	AT5G49400.1_zinc knuckle (CCHC-type) family protein	.	18.67	11.1733	16.1233	15.8967	19	19.08	17.93	11.01	13.28	9.23	15.95	17.06	15.36	16.54	16.77	14.38
Am_HQ_2165	4226	XP_004494762.1_protein PIR isoform X1 [Cicer arietinum]	AT5G18410.2_transcription activator, GeneName=PIR121	IPR008081_Cytoplasmic FMR1-interacting	3.82	9.77333	14.0567	18.1133	1.83	7.56	2.07	6.78	12.03	10.51	11.47	14.61	16.09	15.01	16.89	22.44
Am_HQ_2167	4308	TKY47822.1_DNA repair protein RAD50 [Spatholobus suberectus]	AT2G31970.1_DNA repair-recombination protein (RAD50), GeneName=RAD50	IPR027417_P-loop containing nucleoside triphosphate hydrolase	12.8733	9.38667	14.7533	26.38	10.35	19.42	8.85	9.01	11.29	7.86	12.24	17.39	14.63	23.21	27.66	28.27
Am_HQ_2171	4308	XP_004501312.1_UPF0481 protein At3g47200 [Cicer arietinum]	AT4G31980.1_PPPDE thiol peptidase family protein	IPR004158_Protein of unknown function DUF247, plant	0.223333	1.58	0.97	1.90333	0.05	0.51	0.11	1.11	2.24	1.39	0.43	1.15	1.33	1.83	2.03	1.85
Am_HQ_2173	4308	XP_004486471.1_endoribonuclease Dicer homolog 2 isoform X1 [Cicer arietinum]	AT3G03300.3_dicer-like 2, GeneName=DCL2	IPR000999_Ribonuclease III domain; IPR014001_Helicase superfamily 1/2, ATP-binding domain; IPR001650_Helicase, C-terminal; IPR036389_Ribonuclease III, endonuclease domain superfamily; IPR003100_PAZ domain; IPR006935_Helicase/UvrB, N-terminal; IPR027417_P-loop containing nucleoside triphosphate hydrolase	5.98667	3.08667	5.64	10.2633	7.74	4.14	6.08	4.49	1.91	2.86	7.94	2.77	6.21	12.62	2.93	15.24
Am_HQ_2175	4304	XP_013464760.1_trafficking protein particle complex II-specific subunit 130 homolog [Medicago truncatula] KEH38795.1 trafficking protein particle complex subunit-like protein [Medicago truncatula] RHN75163.1 putative TRAPP II complex, TRAPPC10 protein [Medicago truncatula]	AT5G54440.1_CLUB, GeneName=CLUB	IPR022233_TRAPP II complex TRAPPC10, C-terminal	10.02	26.4033	26.2267	37.65	6.25	18.38	5.43	19.82	30.74	28.65	18.63	29.3	30.75	29.17	39.13	44.65
Am_HQ_2177	4305	RDX89018.1_TMV resistance protein N, partial [Mucuna pruriens]	AT5G17680.2_disease resistance protein (TIR-NBS-LRR class)	.	0.56	0.563333	1.47333	0.326667	0.94	0	0.74	0	0.57	1.12	0.83	1.44	2.15	0.98	0	0
Am_HQ_2179	4307	KHN22031.1_hypothetical protein glysoja_008943 [Glycine soja]	AT5G60150.2_hypothetical protein	.	0.0266667	0.47	0.266667	1.22	0	0	0.08	1.41	0	0	0.8	0	0	0.8	2.86	0
Am_HQ_2180	4334	XP_004501753.1_protein MEI2-like 1 [Cicer arietinum]	AT5G07290.1_MEI2-like 4, GeneName=ML4	IPR007201_Mei2-like, C-terminal RNA recognition motif; IPR035979_RNA-binding domain superfamily	2.10333	3.77	5.23333	2.67333	2.07	1.7	2.54	4.2	3.63	3.48	5.09	5.45	5.16	3.49	2.62	1.91
Am_HQ_2181	4293	RDX69438.1_SWI/SNF complex subunit SWI3D, partial [Mucuna pruriens]	AT4G34430.2_DNA-binding family protein, GeneName=CHB3	IPR017930_Myb domain; IPR032451_SMARCC, C-terminal; IPR000433_Zinc finger, ZZ-type; IPR009057_Homeobox-like domain superfamily; IPR001005_SANT/Myb domain	13.73	9.92333	9.78	9.82	12.08	11.79	17.32	9.43	10.62	9.72	8.72	10.79	9.83	8.95	9.92	10.59
Am_HQ_2184	4204	XP_004506842.1_uncharacterized protein LOC101514293 isoform X1 [Cicer arietinum]	AT1G15240.2_phox (PX) domain-containing protein	IPR003114_Phox-associated domain; IPR001683_Phox homology; IPR013937_Sorting nexin, C-terminal; IPR036871_PX domain superfamily	6.86333	16.38	14.1533	13.1267	5.15	10.7	4.74	16.18	16.85	16.11	12.21	15.27	14.98	11.99	13.81	13.58
Am_HQ_2186	4302	XP_004491335.1_uncharacterized protein LOC101508823 isoform X2 [Cicer arietinum]	AT1G29820.1_Magnesium transporter CorA-like family protein	IPR045863_CorA, transmembrane region; IPR002523_Mg2+ transporter protein, CorA-like/Zinc transport protein ZntB	0.853333	10.57	3.54333	4.75333	0.73	1.34	0.49	12.32	10.96	8.43	2.13	4.74	3.76	4.42	5.03	4.81
Am_HQ_2193	4300	XP_004511218.1_PH, RCC1 and FYVE domains-containing protein 1-like [Cicer arietinum]	AT5G19420.1_Regulator of chromosome condensation (RCC1) family with FYVE zinc finger domain-containing protein	IPR009091_Regulator of chromosome condensation 1/beta-lactamase-inhibitor protein II; IPR000408_Regulator of chromosome condensation, RCC1; IPR001849_Pleckstrin homology domain; IPR000306_FYVE zinc finger; IPR011011_Zinc finger, FYVE/PHD-type; IPR013591_Brevis radix (BRX) domain; IPR027988_Transcription factor BREVIS RADIX, N-terminal domain	1.12	3.59667	5.41333	2.33667	1.42	1.09	0.85	4.49	3.23	3.07	9.04	4.32	2.88	2.33	2.23	2.45
Am_HQ_2200	4255	XP_004501745.1_chaperone protein ClpC, chloroplastic [Cicer arietinum] XP_004501746.1 chaperone protein ClpC, chloroplastic [Cicer arietinum] XP_004501747.1 chaperone protein ClpC, chloroplastic [Cicer arietinum]	AT5G50920.1_CLPC homologue 1, GeneName=CLPC1	IPR027417_P-loop containing nucleoside triphosphate hydrolase; IPR003593_AAA+ ATPase domain; IPR041546_ClpA/ClpB, AAA lid domain; IPR001270_ClpA/B family; IPR003959_ATPase, AAA-type, core	13.3933	99.0367	24.2533	17.8567	19.81	7.35	13.02	121.55	76.45	99.11	6.2	32.93	33.63	14.54	19.64	19.39
Am_HQ_2202	4297	XP_045823581.1_putative disease resistance RPP13-like protein 1 isoform X1 [Trifolium pratense]	AT3G14470.1_NB-ARC domain-containing disease resistance protein	IPR002182_NB-ARC; IPR041118_Rx, N-terminal; IPR027417_P-loop containing nucleoside triphosphate hydrolase	2.97333	29.01	2.08333	12.7	2.84	3.89	2.19	17.76	47.09	22.18	1.05	3.21	1.99	12.98	14.5	10.62
Am_HQ_2204	4299	XP_004500217.1_DExH-box ATP-dependent RNA helicase DExH11 isoform X1 [Cicer arietinum]	AT3G46960.1_RNA helicase, ATP-dependent, SK12/DOB1 protein	IPR001650_Helicase, C-terminal; IPR011545_DEAD/DEAH box helicase domain; IPR012961_ATP-dependent RNA helicase Ski2, C-terminal; IPR040801_Ski2, N-terminal domain; IPR027417_P-loop containing nucleoside triphosphate hydrolase; IPR025696_rRNA-processing arch domain; IPR014001_Helicase superfamily 1/2, ATP-binding domain; IPR016438_ATP-dependent RNA helicase Ski2-like	11.7067	12.1867	8.69667	17.62	18.54	11.51	5.07	11.41	14.14	11.01	7.22	9.55	9.32	13.57	19.98	19.31
Am_HQ_2213	4233	KAG4910603.1_hypothetical protein JHK87_056719 [Glycine soja]	AT1G76810.1_eukaryotic translation initiation factor 2 (eIF-2) family protein	IPR027417_P-loop containing nucleoside triphosphate hydrolase; IPR029459_Elongation factor Tu-type domain; IPR023115_Translation initiation factor IF- 2, domain 3; IPR036925_Translation initiation factor IF-2, domain 3 superfamily; IPR009000_Translation protein, beta-barrel domain superfamily; IPR005225_Small GTP-binding protein domain; IPR004161_Translation elongation factor EFTu-like, domain 2;…	72.7867	31.38	22.1567	22.6733	116.1	39.2	63.06	36.68	29.06	28.4	17.04	25.84	23.59	25.76	22.34	19.92
Am_HQ_2215	4113	XP_004502893.1_uncharacterized protein LOC101500766 [Cicer arietinum]	AT5G09840.1_Putative endonuclease or glycosyl hydrolase	IPR025605_OST-HTH/LOTUS domain; IPR021139_NYN domain, MARF1-type	1.79667	5.07667	6.53667	6.67333	1.05	2.92	1.42	4.23	6.46	4.54	5.32	7.16	7.13	5.27	5.77	8.98
Am_HQ_2216	4294	.	.	.	0.1	3.53	2.01	1.99	0	0.13	0.17	5.57	0.74	4.28	1.67	0.45	3.91	2.23	0.42	3.32
Am_HQ_2217	4200	TKY70937.1_LRR receptor serine/threonine-protein kinase [Spatholobus suberectus]	AT1G63430.1_Leucine-rich repeat protein kinase family protein	IPR001611_Leucine-rich repeat	3.34333	5.75667	6.17	4.85	6.25	3.28	0.5	6.09	5.75	5.43	8.75	4.65	5.11	6.86	4.54	3.15
Am_HQ_2219	4253	XP_004489352.1_ABC transporter B family member 15-like [Cicer arietinum]	AT3G28345.1_ABC transporter family protein, GeneName=ABCB15	IPR036640_ABC transporter type 1, transmembrane domain superfamily; IPR003593_AAA+ ATPase domain; IPR003439_ABC transporter-like, ATP-binding domain; IPR027417_P-loop containing nucleoside triphosphate hydrolase; IPR011527_ABC transporter type 1, transmembrane domain	3.76667	0.0466667	0.176667	5.35	4.03	3.02	4.25	0.03	0.09	0.02	0.14	0.24	0.15	2.79	9.17	4.09
Am_HQ_2222	4262	XP_045816807.1_uncharacterized protein LOC123909918 [Trifolium pratense] XP_045816808.1 uncharacterized protein LOC123909918 [Trifolium pratense]	AT1G73460.2_Protein kinase superfamily protein	IPR000719_Protein kinase domain; IPR011009_Protein kinase-like domain superfamily	11.72	21.5467	19.74	21.7567	9.14	13.6	12.42	22.37	21.73	20.54	13.96	22.3	22.96	19.24	21.34	24.69
Am_HQ_2224	4130	CAB81547.1_68 kDa protein [Cicer arietinum]	AT3G61130.1_galacturonosyltransferase 1, GeneName=GAUT1	IPR002495_Glycosyl transferase, family 8; IPR029044_Nucleotide-diphospho-sugar transferases	1.02	2.46	1.93	2.49667	0.85	1.19	1.02	1.63	3.41	2.34	1.31	2.31	2.17	2.14	2.35	3
Am_HQ_2230	4292	XP_004485478.1_ATP-dependent DNA helicase Q-like 4A [Cicer arietinum] XP_004485479.1 ATP-dependent DNA helicase Q-like 4A [Cicer arietinum]	AT1G10930.1_DNA helicase (RECQl4A), GeneName=RECQ4A	IPR027417_P-loop containing nucleoside triphosphate hydrolase; IPR002121_HRDC domain; IPR018982_RQC domain; IPR010997_HRDC-like superfamily; IPR032284_ATP-dependent DNA helicase RecQ, zinc-binding domain; IPR001650_Helicase, C-terminal; IPR011545_DEAD/DEAH box helicase domain; IPR014001_Helicase superfamily 1/2, ATP-binding domain; IPR004589_DNA helicase, ATP-dependent, RecQ type	0.29	1.51333	4.07667	3.16333	0.18	0.56	0.13	0.81	2.16	1.57	4.03	4.27	3.93	1.92	3.02	4.55
Am_HQ_2231	4289	XP_013466103.1_probable LRR receptor-like serine/threonine-protein kinase At2g16250 [Medicago truncatula] KEH40143.1 LRR receptor-like kinase family protein [Medicago truncatula] RHN77469.1 putative protein kinase RLK-Pelle-LRR-XIV family [Medicago truncatula]	AT2G16250.1_Leucine-rich repeat protein kinase family protein	IPR003591_Leucine-rich repeat, typical subtype; IPR001611_Leucine-rich repeat; IPR011009_Protein kinase-like domain superfamily; IPR001245_Serine-threonine/tyrosine-protein kinase, catalytic domain	3.97	21.27	9.01667	9.57	0.33	9.01	2.57	15.14	34.39	14.28	0.79	15.94	10.32	9.2	11.54	7.97
Am_HQ_2237	4287	XP_020230029.1_DEAD-box ATP-dependent RNA helicase 42 [Cajanus cajan]	AT1G20920.5_P-loop containing nucleoside triphosphate hydrolases superfamily protein	IPR027417_P-loop containing nucleoside triphosphate hydrolase; IPR011545_DEAD/DEAH box helicase domain; IPR001650_Helicase, C-terminal; IPR014001_Helicase superfamily 1/2, ATP-binding domain	0	0.07	0	0	0	0	0	0	0	0.21	0	0	0	0	0	0
Am_HQ_2240	4287	AMC33071.1_ribosomal protein S3 [Astragalus crassicarpus]	ATMG00090.1_structural constituent of ribosome;protein binding protein, GeneName=RPS3	IPR001351_Ribosomal protein S3, C-terminal; IPR009019_K homology domain superfamily, prokaryotic type; IPR036419_Ribosomal protein S3, C-terminal domain superfamily	0.0733333	0.403333	0.27	0.16	0	0	0.22	0.76	0.11	0.34	0.62	0.19	0	0.18	0.05	0.25
Am_HQ_2241	4203	XP_004505341.2_peroxisome biogenesis protein 1 isoform X1 [Cicer arietinum] XP_004505342.2 peroxisome biogenesis protein 1 isoform X2 [Cicer arietinum] XP_012572582.1 peroxisome biogenesis protein 1 isoform X1 [Cicer arietinum]	AT5G08470.1_peroxisome 1, GeneName=PEX1	IPR015342_Peroxisome biogenesis factor 1, N-terminal, psi beta-barrel fold; IPR009010_Aspartate decarboxylase-like domain superfamily; IPR029067_CDC48 domain 2-like superfamily	22.5067	34.0933	17.9533	28.5767	29.98	23.92	13.62	31.96	38.33	31.99	18.53	18.28	17.05	29.88	29.53	26.32
Am_HQ_2245	4287	MCH80322.1_hypothetical protein [Trifolium medium]	ATMG00860.1_DNA/RNA polymerases superfamily protein, GeneName=ORF158	.	1.54667	3.68667	2.38333	3.99	1.24	1.17	2.23	3.79	4.03	3.24	2.26	2.42	2.47	3.8	4.04	4.13
Am_HQ_2248	4286	XP_020204982.1_probable RNA-dependent RNA polymerase 5 isoform X1 [Cajanus cajan]	AT2G19930.3_RNA-dependent RNA polymerase family protein	IPR007855_RNA-dependent RNA polymerase, eukaryotic-type	1.30667	2.98333	2.64333	3.91	0.9	1.62	1.4	3.59	2.6	2.76	1.74	2.59	3.6	3.68	2.5	5.55
Am_HQ_2250	4285	XP_004516231.1_protein transport protein SEC31 homolog B [Cicer arietinum]	AT3G63460.1_transducin family protein / WD-40 repeat family protein	IPR001680_WD40 repeat; IPR036322_WD40-repeat-containing domain superfamily; IPR024298_Ancestral coatomer element 1, Sec16/Sec31	26.56	22.34	22.6867	25.4233	28.85	25.2	25.63	18.2	24.24	24.58	18.18	26.18	23.7	20.47	23.07	32.73
Am_HQ_2253	4181	KAG4937587.1_hypothetical protein JHK85_052506 [Glycine max]	AT1G67230.1_little nuclei1, GeneName=LINC1	.	53.0467	42.7967	35.9767	33.0633	30.37	48.94	79.83	43.56	43.17	41.66	25.95	43.65	38.33	35.42	34.61	29.16
Am_HQ_2260	4258	XP_003589912.1_ubiquitin carboxyl-terminal hydrolase 12 isoform X4 [Medicago truncatula] AES60163.1 ubiquitin carboxyl-terminal hydrolase-like protein [Medicago truncatula] RHN78835.1 putative ubiquitinyl hydrolase 1 [Medicago truncatula]	AT3G11910.3_ubiquitin-specific protease 13, GeneName=UBP13	IPR029346_Ubiquitin carboxyl-terminal hydrolase, C-terminal; IPR038765_Papain-like cysteine peptidase superfamily; IPR001394_Peptidase C19, ubiquitin carboxyl-terminal hydrolase; IPR002083_MATH/TRAF domain; IPR024729_Ubiquitin carboxyl-terminal hydro	28.05	32.4233	29.3767	43.8733	24.13	35.11	24.91	28.66	39.5	29.11	20.26	35.74	32.13	34.23	44.19	53.2
Am_HQ_2261	4274	PNY17334.1_protein argonaute 10-like, partial [Trifolium pratense]	AT5G43810.1_Stabilizer of iron transporter SufD / Polynucleotidyl transferase, GeneName=AGO10	IPR014811_Argonaute, linker 1 domain; IPR003165_Piwi domain; IPR003100_PAZ domain; IPR012337_Ribonuclease H-like superfamily; IPR032474_Protein argonaute, N-terminal; IPR032472_Argonaute linker 2 domain; IPR032473_Protein argonaute, Mid domain; IPR036085_PAZ domain superfamily	1.66333	7.49	15.2133	25.41	1.27	2.7	1.02	5.51	9.69	7.27	14.7	14.35	16.59	18.09	34.58	23.56
Am_HQ_2262	4282	AES76299.2_disease resistance protein (TIR-NBS-LRR class), putative [Medicago truncatula]	AT5G17680.1_disease resistance protein (TIR-NBS-LRR class)	.	12.1833	0.0166667	0.153333	0.19	2.48	21.88	12.19	0.03	0	0.02	0.2	0.11	0.15	0.38	0.11	0.08
Am_HQ_2263	4255	XP_045820852.1_protein TORNADO 1-like [Trifolium pratense]	AT5G55540.2_tornado 1, GeneName=TRN1	.	0	0.04	0	0.51	0	0	0	0	0	0.12	0	0	0	0.49	0.27	0.77
Am_HQ_2264	4244	XP_004495974.1_uncharacterized protein LOC101498262 [Cicer arietinum]	AT4G02480.1_AAA-type ATPase family protein	IPR003593_AAA+ ATPase domain; IPR003959_ATPase, AAA-type, core; IPR041569_AAA ATPase, AAA+ lid domain; IPR027417_P-loop containing nucleoside triphosphate hydrolase; IPR008984_SMAD/FHA domain superfamily	49.3567	49.5667	54.9067	41.39	41.4	50.66	56.01	45.65	48.81	54.24	38.66	65.59	60.47	40.93	41.22	42.02
Am_HQ_2265	4244	RDX84507.1_ATPase family AAA domain-containing protein 1, partial [Mucuna pruriens]	AT4G02480.1_AAA-type ATPase family protein	IPR041569_AAA ATPase, AAA+ lid domain; IPR003593_AAA+ ATPase domain; IPR008984_SMAD/FHA domain superfamily; IPR027417_P-loop containing nucleoside triphosphate hydrolase; IPR003959_ATPase, AAA-type, core	93.3433	81.1933	67.64	65.97	90.74	89.96	99.33	72.07	86.82	84.69	43.27	81.8	77.85	59.73	68.65	69.53
Am_HQ_2269	4245	RVW48419.1_Retrovirus-related Pol polyprotein from transposon TNT 1-94 [Vitis vinifera]	AT4G23160.3_cysteine-rich RECEPTOR-like kinase, GeneName=CRK8	IPR012337_Ribonuclease H-like superfamily; IPR001878_Zinc finger, CCHC-type; IPR001584_Integrase, catalytic core; IPR036875_Zinc finger, CCHC-type superfamily; IPR013103_Reverse transcriptase, RNA-dependent DNA polymerase; IPR043502_DNA/RNA polymerase superfamily; IPR025724_GAG-pre-integrase domain	0.823333	5.01667	2.97	4.62667	0.5	1.54	0.43	5.03	4.56	5.46	2.98	2.91	3.02	4.17	4.7	5.01
Am_HQ_2270	4289	KAG7019021.1_CAAX prenyl protease 1-like protein [Cucurbita argyrosperma subsp. argyrosperma]	AT4G01320.1_Peptidase family M48 family protein, GeneName=ATSTE24	IPR001915_Peptidase M48; IPR032456_CAAX prenyl protease 1, N-terminal	0.686667	1.97667	1.6	2.09667	0.82	0.69	0.55	1.22	3.09	1.62	0.91	2.05	1.84	1.19	2.71	2.39
Am_HQ_2275	4287	XP_007132119.1_hypothetical protein PHAVU_011G068200g [Phaseolus vulgaris] ESW04113.1 hypothetical protein PHAVU_011G068200g [Phaseolus vulgaris]	AT1G07740.1_Tetratricopeptide repeat (TPR)-like superfamily protein	IPR002885_Pentatricopeptide repeat; IPR011990_Tetratricopeptide-like helical domain superfamily	0.22	0.396667	0.556667	0.983333	0.34	0.25	0.07	0.41	0.44	0.34	0.32	0.74	0.61	0.68	1.28	0.99
Am_HQ_2280	4280	PON97524.1_Mitochondrial carrier protein [Trema orientale]	AT4G01100.1_adenine nucleotide transporter 1, GeneName=ADNT1	IPR018108_Mitochondrial substrate/solute carrier; IPR023395_Mitochondrial carrier domain superfamily; IPR002067_Mitochondrial carrier protein	1.51667	2.58333	1.04333	1.52667	2.27	0.93	1.35	2.19	3.26	2.3	0.67	1.38	1.08	1.12	1.98	1.48
Am_HQ_2282	4250	RDX91591.1_Cellulose synthase-like protein D3, partial [Mucuna pruriens]	AT3G03050.1_cellulose synthase-like D3, GeneName=CSLD3	IPR005150_Cellulose synthase; IPR029044_Nucleotide-diphospho-sugar transferases	86.3133	6.24667	4.64	22.37	8.96	106.78	143.2	10.97	2.18	5.59	2.86	4.8	6.26	46.94	6.16	14.01
[truncated: 31,561 more rows]
