# Supplementary material for: Enhancing transcriptome analysis in medicinal plants: multiple unigene sets in Astragalus membranaceus
Source: Front Plant Sci. 2024 Feb 7;15:1301526. doi: 10.3389/fpls.2024.1301526 (PMC10879423; doi:10.3389/fpls.2024.1301526)
Supplement: Supplementary file 4 [file Table_3.xlsx]

## Sheet: Table S5
Supplementary Table 5. Expression information of unigene set-2 (rnaSPAdes-assembled contigs) (Page-1).
Unigene ID	Unigene length	Annotation description			Average TPM				Roots			Leaves			Flowers			Stems
		NR blast	Araport11	InterPro	Roots	Leaves	Flowers	Stems	R1	R2	R3	L1	L2	L3	F1	F2	F3	S1	S2	S3
Am_Rn_000001	19621	XP_017239676.1_PREDICTED: uncharacterized protein LOC108212460 [Daucus carota subsp. sativus]	AT5G20090.1_Uncharacterized protein family (UPF0041)	IPR043502_DNA/RNA polymerase superfamily	0.303333	0.07	0.303333	0.23	0.16	0.23	0.52	0.15	0.06	0	0.23	0.39	0.29	0.1	0.46	0.13
Am_Rn_000002	17876	XP_045810121.1_uncharacterized protein LOC123904507 [Trifolium pratense]	ATMG00750.1_GAG/POL/ENV polyprotein, GeneName=ORF119	IPR041588_Integrase zinc-binding domain; IPR043502_DNA/RNA polymerase superfamily; IPR012337_Ribonuclease H-like superfamily; IPR001584_Integrase, catalytic core; IPR041373_Reverse transcriptase, RNase H-like domain; IPR000477_Reverse transcriptase domain	2.22	1.74333	1.54333	1.7	3.86	0.12	2.68	1.94	0.15	3.14	0.99	0.19	3.45	1.7	0.12	3.28
Am_Rn_000003	17292	XP_017239676.1_PREDICTED: uncharacterized protein LOC108212460 [Daucus carota subsp. sativus]	AT5G17370.1_Transducin/WD40 repeat-like superfamily protein	IPR043502_DNA/RNA polymerase superfamily	0.263333	14.0367	1.81333	2.26333	0.32	0.32	0.15	15.91	17.44	8.76	0	3.19	2.25	1.44	2.81	2.54
Am_Rn_000004	17289	KEH40352.1_stress-induced receptor-like kinase [Medicago truncatula]	AT5G38280.1_PR5-like receptor kinase, GeneName=PR5K	IPR011009_Protein kinase-like domain superfamily; IPR025287_Wall-associated receptor kinase, galacturonan-binding domain; IPR000719_Protein kinase domain	0.0333333	4.09	0.143333	0.563333	0.06	0.04	0	2.86	4.16	5.25	0.1	0.15	0.18	0.43	0.37	0.89
Am_Rn_000005	17152	XP_025703912.1_uncharacterized protein LOC112805796 [Arachis hypogaea]	AT4G29090.1_Ribonuclease H-like superfamily protein	IPR000477_Reverse transcriptase domain; IPR036691_Endonuclease/exonuclease/phosphatase superfamily	0.0833333	0.51	0.396667	1.07333	0.09	0.11	0.05	0.49	0.7	0.34	0.02	0.6	0.57	0.62	1.25	1.35
Am_Rn_000006	16885	XP_027192505.1_LOW QUALITY PROTEIN: midasin [Cicer arietinum]	AT1G67120.1_midasin-like protein	IPR036465_von Willebrand factor A-like domain superfamily; IPR027417_P-loop containing nucleoside triphosphate hydrolase; IPR012099_Midasin; IPR041190_Midasin AAA lid domain 5; IPR003593_AAA+ ATPase domain; IPR040848_Midasin, AAA lid domain 7; IPR011704_ATPase, dynein-related, AAA domain	10.05	7.77	4.78333	10.8067	15.7	12.48	1.97	6.22	11.11	5.98	0.59	6.72	7.04	4.74	10.65	17.03
Am_Rn_000007	16060	XP_017416451.1_PREDICTED: LOW QUALITY PROTEIN: uncharacterized protein LOC108327238 [Vigna angularis]	AT5G17680.2_disease resistance protein (TIR-NBS-LRR class)	IPR021109_Aspartic peptidase domain superfamily; IPR005162_Retrotransposon gag domain; IPR000467_G-patch domain	0.266667	2.07667	0.393333	0.683333	0.29	0.16	0.35	2.34	2.29	1.6	0.33	0.36	0.49	0.54	0.73	0.78
Am_Rn_000008	15980	KYP38573.1_Retrovirus-related Pol polyprotein from transposon TNT 1-94, partial [Cajanus cajan]	AT4G27290.2_S-locus lectin protein kinase family protein	IPR043502_DNA/RNA polymerase superfamily; IPR013103_Reverse transcriptase, RNA-dependent DNA polymerase; IPR001584_Integrase, catalytic core; IPR012337_Ribonuclease H-like superfamily; IPR036875_Zinc finger, CCHC-type superfamily; IPR025724_GAG-pre-integrase domain	0.54	0	0	0	0	0	1.62	0	0	0	0	0	0	0	0	0
Am_Rn_000009	15977	XP_045795149.1_auxin transport protein BIG [Trifolium pratense]	AT3G02260.2_auxin transport protein (BIG), GeneName=BIG	IPR016024_Armadillo-type fold; IPR000433_Zinc finger, ZZ-type; IPR003126_Zinc finger, UBR-type	0.98	0.33	0.68	1.38333	1	0.56	1.38	0.46	0.53	0	0.77	0.75	0.52	2.38	0.23	1.54
Am_Rn_000010	15872	BAG72151.1_hypothetical protein [Lotus japonicus]	AT1G72560.1_ARM repeat superfamily protein, GeneName=PSD	IPR021109_Aspartic peptidase domain superfamily; IPR016197_Chromo-like domain superfamily; IPR012337_Ribonuclease H-like superfamily; IPR041588_Integrase zinc-binding domain; IPR043502_DNA/RNA polymerase superfamily; IPR041577_Reverse transcriptase/retrotransposon-derived protein, RNase H-like domain; IPR023780_Chromo domain; IPR000477_Reverse transcriptase domain	0.06	0.0266667	0.0333333	0.02	0.04	0.03	0.11	0.02	0.06	0	0	0.04	0.06	0	0.02	0.04
Am_Rn_000011	15869	GAU14040.1_hypothetical protein TSUD_168640 [Trifolium subterraneum]	AT3G02260.4_auxin transport protein (BIG), GeneName=BIG	IPR025704_E3 ubiquitin ligase UBR4, C-terminal; IPR016024_Armadillo-type fold; IPR000433_Zinc finger, ZZ-type	0.516667	0.0966667	0.21	0.323333	0	0.77	0.78	0.29	0	0	0	0.37	0.26	0	0	0.97
Am_Rn_000012	15811	KAG7551573.1_Zinc finger CCHC-type [Arabidopsis thaliana x Arabidopsis arenosa]	AT4G23160.3_cysteine-rich RECEPTOR-like kinase, GeneName=CRK8	IPR043502_DNA/RNA polymerase superfamily; IPR013103_Reverse transcriptase, RNA-dependent DNA polymerase	0	0	0.136667	0.8	0	0	0	0	0	0	0.4	0.01	0	1.37	1.03	0
Am_Rn_000013	15770	XP_045795149.1_auxin transport protein BIG [Trifolium pratense]	AT3G02260.2_auxin transport protein (BIG), GeneName=BIG	IPR016024_Armadillo-type fold; IPR000433_Zinc finger, ZZ-type; IPR025704_E3 ubiquitin ligase UBR4, C-terminal; IPR003126_Zinc finger, UBR-type	42.5467	17.73	11.3667	24.1567	48.88	52.3	26.46	14.87	20.73	17.59	2.13	15.55	16.42	11.95	26.28	34.24
Am_Rn_000014	15572	PNX71762.1_cysteine-rich receptor-like protein kinase, partial [Trifolium pratense]	AT5G47650.1_nudix hydrolase homolog 2, GeneName=NUDT2	IPR000477_Reverse transcriptase domain; IPR036691_Endonuclease/exonuclease/phosphatase superfamily; IPR043502_DNA/RNA polymerase superfamily	0.0366667	0.473333	0.163333	0.23	0	0.03	0.08	0.62	0.43	0.37	0.13	0.13	0.23	0.26	0.24	0.19
Am_Rn_000015	15508	BAG72151.1_hypothetical protein [Lotus japonicus]	AT5G33406.1_hAT dimerization domain-containing protein / transposase-like protein	IPR021109_Aspartic peptidase domain superfamily; IPR016197_Chromo-like domain superfamily; IPR012337_Ribonuclease H-like superfamily; IPR041588_Integrase zinc-binding domain; IPR043502_DNA/RNA polymerase superfamily; IPR041577_Reverse transcriptase/retrotransposon-derived protein, RNase H-like domain; IPR023780_Chromo domain; IPR000477_Reverse transcriptase domain	0.503333	1.70333	1.18333	1.75333	0.65	0.62	0.24	1.57	1.94	1.6	0.55	1.51	1.49	1.37	1.92	1.97
Am_Rn_000016	15501	XP_004505697.1_uncharacterized protein LOC101494201 [Cicer arietinum]	AT4G38760.1_nucleoporin (DUF3414)	IPR041577_Reverse transcriptase/retrotransposon-derived protein, RNase H-like domain; IPR021109_Aspartic peptidase domain superfamily; IPR043502_DNA/RNA polymerase superfamily; IPR000477_Reverse transcriptase domain	1.3	11.1233	2.21333	6.77	1.06	1.97	0.87	10.31	12.51	10.55	1.26	2.64	2.74	6.25	7.88	6.18
Am_Rn_000017	15454	XP_012567740.1_sacsin [Cicer arietinum]	AT5G23110.1_Zinc finger, C3HC4 type (RING finger) family protein	IPR001841_Zinc finger, RING-type	1.05667	0.42	0.17	0.37	1.4	0.54	1.23	0.27	0.63	0.36	0.17	0.1	0.24	0.09	0.42	0.6
Am_Rn_000018	15397	BAG72151.1_hypothetical protein [Lotus japonicus]	AT1G72560.1_ARM repeat superfamily protein, GeneName=PSD	IPR021109_Aspartic peptidase domain superfamily; IPR016197_Chromo-like domain superfamily; IPR012337_Ribonuclease H-like superfamily; IPR041588_Integrase zinc-binding domain; IPR043502_DNA/RNA polymerase superfamily; IPR041577_Reverse transcriptase/retrotransposon-derived protein, RNase H-like domain; IPR023780_Chromo domain; IPR000477_Reverse transcriptase domain	0	0	0	0	0	0	0	0	0	0	0	0	0	0	0	0
Am_Rn_000019	15213	TKY53560.1_Nuclear pore complex protein NUP1 [Spatholobus suberectus]	AT3G10650.1_nuclear pore complex protein, GeneName=NUP1	.	0.486667	1.12	0.25	1.29	0.58	0	0.88	1	0.79	1.57	0	0.23	0.52	0.57	1.37	1.93
Am_Rn_000020	15133	TKY53560.1_Nuclear pore complex protein NUP1 [Spatholobus suberectus]	AT3G10650.1_nuclear pore complex protein, GeneName=NUP1	.	0.476667	0.46	0.0433333	0.5	0	1.42	0.01	0.75	0.63	0	0.01	0.12	0	0.87	0.63	0
Am_Rn_000021	15031	PNX81943.1_gag-pol polyprotein [Trifolium pratense]	AT3G50830.1_cold-regulated 413-plasma membrane 2, GeneName=COR413-PM2	IPR041588_Integrase zinc-binding domain; IPR001584_Integrase, catalytic core; IPR012337_Ribonuclease H-like superfamily	0.17	0.61	0.38	0.716667	0.14	0.21	0.16	0.61	0.39	0.83	0.34	0.25	0.55	0.43	0.55	1.17
Am_Rn_000022	15017	XP_012567740.1_sacsin [Cicer arietinum]	AT5G23110.1_Zinc finger, C3HC4 type (RING finger) family protein	IPR036890_Histidine kinase/HSP90-like ATPase superfamily; IPR001841_Zinc finger, RING-type	10.8033	9.9	6.51667	10.76	10.75	11.55	10.11	9.38	10.65	9.67	3.81	8.04	7.7	9.23	11.03	12.02
Am_Rn_000023	14655	XP_020237991.1_E3 ubiquitin-protein ligase UPL3 [Cajanus cajan]	AT4G38600.1_HECT ubiquitin protein ligase family protein KAK, GeneName=KAK	IPR000569_HECT domain; IPR016024_Armadillo-type fold; IPR035983_HECT, E3 ligase catalytic domain	0.673333	1.06333	0.833333	1.45333	0.38	0.37	1.27	0.83	1.91	0.45	0.67	1.24	0.59	1.17	1.52	1.67
Am_Rn_000024	14550	KAG7551573.1_Zinc finger CCHC-type [Arabidopsis thaliana x Arabidopsis arenosa]	AT4G23160.3_cysteine-rich RECEPTOR-like kinase, GeneName=CRK8	IPR013103_Reverse transcriptase, RNA-dependent DNA polymerase; IPR043502_DNA/RNA polymerase superfamily; IPR025724_GAG-pre-integrase domain; IPR012337_Ribonuclease H-like superfamily; IPR029472_Retrotransposon Copia-like, N-terminal; IPR005162_Retrotransposon gag domain	1.79333	1.27333	0.783333	0.916667	1.02	0	4.36	0.5	0	3.32	1.4	0	0.95	1.27	0	1.48
Am_Rn_000025	14541	RHN69276.1_putative RNA-directed DNA polymerase [Medicago truncatula]	AT4G23160.3_cysteine-rich RECEPTOR-like kinase, GeneName=CRK8	IPR012337_Ribonuclease H-like superfamily; IPR013103_Reverse transcriptase, RNA-dependent DNA polymerase; IPR025724_GAG-pre-integrase domain; IPR043502_DNA/RNA polymerase superfamily	1.03	5.46333	4.92667	4.56667	1.62	0	1.47	4.89	0.01	11.49	3.22	0	11.56	3.26	0	10.44
Am_Rn_000026	14498	BAG72151.1_hypothetical protein [Lotus japonicus]	AT3G61415.2_SKP1-like 21, GeneName=SK21	IPR021109_Aspartic peptidase domain superfamily; IPR016197_Chromo-like domain superfamily; IPR012337_Ribonuclease H-like superfamily; IPR041588_Integrase zinc-binding domain; IPR043502_DNA/RNA polymerase superfamily; IPR041577_Reverse transcriptase/retrotransposon-derived protein, RNase H-like domain; IPR023780_Chromo domain; IPR000477_Reverse transcriptase domain	1.91	1.34	0.79	1.38667	3.53	1.05	1.15	1.36	1.57	1.09	0.79	0.76	0.82	1.29	1.43	1.44
Am_Rn_000027	14320	PNX75860.1_cysteine-rich receptor-like protein kinase, partial [Trifolium pratense]	AT1G43760.1_DNAse I-like superfamily protein	IPR000477_Reverse transcriptase domain; IPR036691_Endonuclease/exonuclease/phosphatase superfamily; IPR043502_DNA/RNA polymerase superfamily	0.59	0.413333	0.436667	0.28	1.05	0.37	0.35	0.34	0.54	0.36	0.21	0.69	0.41	0.1	0.47	0.27
Am_Rn_000028	14268	XP_012573351.1_uncharacterized protein LOC101488675 [Cicer arietinum]	AT1G48090.5_calcium-dependent lipid-binding family protein	IPR031642_VPS13, repeated coiled region; IPR031646_Vacuolar protein sorting-associated protein 13, second N-terminal domain; IPR026854_Vacuolar protein sorting-associated protein 13-like, N-terminal domain; IPR001849_Pleckstrin homology domain	0.403333	0.296667	0.183333	0.81	0.55	0.56	0.1	0.18	0.33	0.38	0.16	0.27	0.12	0.22	1.7	0.51
Am_Rn_000029	14158	AAO23078.1_polyprotein [Glycine max] KAH1152324.1 hypothetical protein GYH30_045693 [Glycine max]	AT1G03390.1_HXXXD-type acyl-transferase family protein	IPR021109_Aspartic peptidase domain superfamily; IPR000477_Reverse transcriptase domain; IPR041577_Reverse transcriptase/retrotransposon-derived protein, RNase H-like domain; IPR043502_DNA/RNA polymerase superfamily; IPR041588_Integrase zinc-binding domain; IPR001584_Integrase, catalytic core; IPR012337_Ribonuclease H-like superfamily	1.39	1.06	0.403333	1.41667	0.15	3.67	0.35	1.22	1.17	0.79	0.08	0.68	0.45	2.11	1.33	0.81
Am_Rn_000030	14134	KAH1206432.1_TMV resistance protein N [Glycine max]	AT5G36930.3_Disease resistance protein (TIR-NBS-LRR class) family	IPR002182_NB-ARC; IPR000157_Toll/interleukin-1 receptor homology (TIR) domain; IPR027417_P-loop containing nucleoside triphosphate hydrolase; IPR035897_Toll/interleukin-1 receptor homology (TIR) domain superfamily	13.2867	13.4667	2.93	25.69	4.85	22.61	12.4	18.38	10.98	11.04	1.13	3.95	3.71	40.47	16.38	20.22
Am_Rn_000031	14070	XP_012573351.1_uncharacterized protein LOC101488675 [Cicer arietinum]	AT1G48090.2_calcium-dependent lipid-binding family protein	IPR009543_Vacuolar protein sorting-associated protein 13, SHR-binding domain; IPR035892_C2 domain superfamily; IPR009291_Vacuolar protein sorting-associated protein 62	1.37667	0.133333	0.156667	0	1.06	0.7	2.37	0	0	0.4	0	0.02	0.45	0	0	0
Am_Rn_000032	14060	XP_028203799.1_receptor-like protein kinase FERONIA [Glycine soja] KAG5051564.1 hypothetical protein JHK87_003762 [Glycine soja]	ATMG01360.1_cytochrome oxidase, GeneName=COX1	IPR024788_Malectin-like domain; IPR011009_Protein kinase-like domain superfamily; IPR000719_Protein kinase domain	0.74	1.34667	0.806667	1.36	1.03	0.77	0.42	2.86	0.47	0.71	1.44	0.43	0.55	2.72	0.39	0.97
Am_Rn_000033	13988	.	.	.	2.02667	1.19333	0.6	1.49	2.94	1.46	1.68	1.28	1	1.3	0.19	0.78	0.83	1.48	1.47	1.52
Am_Rn_000034	13901	XP_004511407.1_uncharacterized protein LOC101495944 isoform X2 [Cicer arietinum]	AT5G16680.1_RING/FYVE/PHD zinc finger superfamily protein	IPR001584_Integrase, catalytic core; IPR012337_Ribonuclease H-like superfamily; IPR025724_GAG-pre-integrase domain; IPR043502_DNA/RNA polymerase superfamily; IPR013103_Reverse transcriptase, RNA-dependent DNA polymerase	0.00666667	0.0166667	0.02	0.01	0	0.02	0	0	0.02	0.03	0	0.06	0	0.03	0	0
Am_Rn_000035	13899	XP_045801011.1_probable leucine-rich repeat receptor-like serine/threonine-protein kinase At3g14840 isoform X2 [Trifolium pratense]	AT3G14840.2_Leucine-rich repeat transmembrane protein kinase	IPR000719_Protein kinase domain; IPR021720_Malectin domain; IPR011009_Protein kinase-like domain superfamily	0	0.923333	0.753333	0.953333	0	0	0	0.66	1.18	0.93	0.29	0.76	1.21	0.64	0.84	1.38
Am_Rn_000036	13882	XP_004511755.1_uncharacterized protein LOC101495071 [Cicer arietinum]	AT4G17140.3_pleckstrin homology (PH) domain-containing protein	IPR031646_Vacuolar protein sorting-associated protein 13, second N-terminal domain; IPR031642_VPS13, repeated coiled region; IPR001849_Pleckstrin homology domain; IPR009291_Vacuolar protein sorting-associated protein 62; IPR026854_Vacuolar protein sorting-associated protein 13-like, N-terminal domain	0.473333	0.233333	0.186667	0.103333	0.93	0.3	0.19	0	0.7	0	0	0	0.56	0	0	0.31
Am_Rn_000037	13836	GAU26239.1_hypothetical protein TSUD_224300 [Trifolium subterraneum]	AT4G20520.1_RNA binding / RNA-directed DNA polymerase	.	0	2.02333	4.6	0.273333	0	0	0	2.18	2.34	1.55	2.73	5.93	5.14	0.17	0.4	0.25
Am_Rn_000038	13823	XP_012573351.1_uncharacterized protein LOC101488675 [Cicer arietinum]	AT1G48090.4_calcium-dependent lipid-binding family protein	IPR009543_Vacuolar protein sorting-associated protein 13, SHR-binding domain; IPR001849_Pleckstrin homology domain; IPR035892_C2 domain superfamily; IPR031646_Vacuolar protein sorting-associated protein 13, second N-terminal domain; IPR026854_Vacuolar protein sorting-associated protein 13-like, N-terminal domain; IPR031642_VPS13, repeated coiled region; IPR009291_Vacuolar protein sorting-associat…	14.7633	17.7667	11.4167	18.0267	16.29	22.51	5.49	16.31	22.84	14.15	1.72	17.38	15.15	10.97	18.67	24.44
Am_Rn_000039	13799	XP_004511755.1_uncharacterized protein LOC101495071 [Cicer arietinum]	AT4G17140.3_pleckstrin homology (PH) domain-containing protein	IPR031646_Vacuolar protein sorting-associated protein 13, second N-terminal domain; IPR001849_Pleckstrin homology domain; IPR009291_Vacuolar protein sorting-associated protein 62; IPR031642_VPS13, repeated coiled region; IPR009543_Vacuolar protein sorting-associated protein 13, SHR-binding domain; IPR026854_Vacuolar protein sorting-associated protein 13-like, N-terminal domain	16.65	20.3933	9.98333	15.8567	22.66	18.47	8.82	19.27	22.12	19.79	1.72	13.19	15.04	11.48	15.56	20.53
Am_Rn_000040	13788	XP_027346076.1_E3 ubiquitin-protein ligase UPL1-like isoform X1 [Abrus precatorius]	AT1G55860.1_LOW protein: E3 ubiquitin ligase-like protein, GeneName=UPL1	IPR035983_HECT, E3 ligase catalytic domain; IPR000569_HECT domain; IPR015940_Ubiquitin-associated domain; IPR016024_Armadillo-type fold; IPR010314_E3 ubiquitin ligase, domain of unknown function DUF913; IPR025527_HUWE1/Rev1, ubiquitin binding region; IPR009060_UBA-like superfamily	6.57667	6.93667	6.30667	7.90333	6.72	7.26	5.75	6	7.69	7.12	2.19	8.92	7.81	6.08	7.92	9.71
Am_Rn_000041	13777	PNX81943.1_gag-pol polyprotein [Trifolium pratense]	AT3G50830.1_cold-regulated 413-plasma membrane 2, GeneName=COR413-PM2	IPR041588_Integrase zinc-binding domain; IPR001584_Integrase, catalytic core; IPR012337_Ribonuclease H-like superfamily	0.213333	0.623333	0.36	0.3	0	0.64	0	0.05	1.7	0.12	0	0.95	0.13	0	0.9	0
Am_Rn_000042	13710	XP_019104280.1_PREDICTED: uncharacterized protein LOC109134684 [Beta vulgaris subsp. vulgaris]	ATMG00750.1_GAG/POL/ENV polyprotein, GeneName=ORF119	IPR041577_Reverse transcriptase/retrotransposon-derived protein, RNase H-like domain; IPR000477_Reverse transcriptase domain; IPR043502_DNA/RNA polymerase superfamily	1.86667	0.373333	0.173333	0.206667	2.9	1.44	1.26	0.16	0.52	0.44	0.06	0.22	0.24	0.23	0.19	0.2
Am_Rn_000043	13662	KYP38573.1_Retrovirus-related Pol polyprotein from transposon TNT 1-94, partial [Cajanus cajan]	AT4G23160.3_cysteine-rich RECEPTOR-like kinase, GeneName=CRK8	IPR043502_DNA/RNA polymerase superfamily; IPR025724_GAG-pre-integrase domain; IPR013103_Reverse transcriptase, RNA-dependent DNA polymerase; IPR012337_Ribonuclease H-like superfamily; IPR036875_Zinc finger, CCHC-type superfamily; IPR001584_Integrase, catalytic core	0.51	0	0.00666667	0	0.14	0.18	1.21	0	0	0	0.02	0	0	0	0	0
Am_Rn_000044	13546	XP_004512131.1_transformation/transcription domain-associated protein [Cicer arietinum]	AT2G17930.1_Phosphatidylinositol 3- and 4-kinase family protein with FAT domain-containing protein	IPR003152_FATC domain; IPR011009_Protein kinase-like domain superfamily; IPR000403_Phosphatidylinositol 3-/4-kinase, catalytic domain; IPR016024_Armadillo-type fold; IPR003151_PIK-related kinase, FAT	0	0.14	0.126667	0.28	0	0	0	0	0.42	0	0	0.38	0	0	0.44	0.4
Am_Rn_000045	13489	XP_027188658.1_LOW QUALITY PROTEIN: uncharacterized protein LOC113785801 [Cicer arietinum]	.	IPR000467_G-patch domain; IPR005162_Retrotransposon gag domain; IPR021109_Aspartic peptidase domain superfamily	17.0933	0.0866667	0.0533333	0.23	24.39	10.6	16.29	0.06	0.1	0.1	0.02	0.07	0.07	0.12	0.3	0.27
Am_Rn_000046	13329	KEH40352.1_stress-induced receptor-like kinase [Medicago truncatula]	AT1G66910.2_Protein kinase superfamily protein	IPR011009_Protein kinase-like domain superfamily; IPR025287_Wall-associated receptor kinase, galacturonan-binding domain; IPR000719_Protein kinase domain	0	0.86	0.0466667	0.296667	0	0	0	1.26	1	0.32	0	0.04	0.1	0.5	0.3	0.09
Am_Rn_000047	13301	XP_020236316.1_uncharacterized protein LOC109815911 [Cajanus cajan]	.	IPR005162_Retrotransposon gag domain	0.146667	2.70667	0.0866667	0.486667	0.14	0.2	0.1	2.02	2.92	3.18	0.02	0.08	0.16	0.54	0.35	0.57
Am_Rn_000048	13270	KAG7551573.1_Zinc finger CCHC-type [Arabidopsis thaliana x Arabidopsis arenosa]	AT4G23160.3_cysteine-rich RECEPTOR-like kinase, GeneName=CRK8	IPR043502_DNA/RNA polymerase superfamily; IPR013103_Reverse transcriptase, RNA-dependent DNA polymerase	2.40333	2.52	1.61667	1.23667	3.77	1.86	1.58	1.88	3.22	2.46	0.73	2.06	2.06	0.04	1.69	1.98
Am_Rn_000049	13229	XP_004511407.1_uncharacterized protein LOC101495944 isoform X2 [Cicer arietinum]	AT5G16680.1_RING/FYVE/PHD zinc finger superfamily protein	IPR011011_Zinc finger, FYVE/PHD-type	0.136667	0.38	0.19	0.25	0.23	0.08	0.1	0.28	0.48	0.38	0.07	0.26	0.24	0.11	0.36	0.28
Am_Rn_000050	13209	PNX81943.1_gag-pol polyprotein [Trifolium pratense]	AT3G50830.1_cold-regulated 413-plasma membrane 2, GeneName=COR413-PM2	IPR041588_Integrase zinc-binding domain; IPR001584_Integrase, catalytic core; IPR012337_Ribonuclease H-like superfamily	0.0433333	0.7	0.0866667	0.41	0.04	0.09	0	0.74	0.62	0.74	0	0.16	0.1	0.28	0.48	0.47
Am_Rn_000051	13191	XP_025703912.1_uncharacterized protein LOC112805796 [Arachis hypogaea]	AT4G29090.1_Ribonuclease H-like superfamily protein	IPR000477_Reverse transcriptase domain; IPR036691_Endonuclease/exonuclease/phosphatase superfamily	0.0233333	0.0666667	0.07	0.19	0	0.05	0.02	0	0	0.2	0.21	0	0	0.31	0.26	0
Am_Rn_000052	13177	PNX81943.1_gag-pol polyprotein [Trifolium pratense]	AT3G50830.1_cold-regulated 413-plasma membrane 2, GeneName=COR413-PM2	IPR041588_Integrase zinc-binding domain; IPR001584_Integrase, catalytic core; IPR012337_Ribonuclease H-like superfamily	0.14	0.05	0.0866667	0.05	0.28	0.05	0.09	0.05	0.05	0.05	0.05	0.09	0.12	0.03	0.1	0.02
Am_Rn_000053	13149	BAG72151.1_hypothetical protein [Lotus japonicus]	AT2G19450.1_membrane bound O-acyl transferase (MBOAT) family protein, GeneName=TAG1	IPR041577_Reverse transcriptase/retrotransposon-derived protein, RNase H-like domain; IPR043502_DNA/RNA polymerase superfamily; IPR000477_Reverse transcriptase domain; IPR005162_Retrotransposon gag domain; IPR021109_Aspartic peptidase domain superfamily	0.14	1.23333	0.596667	0.613333	0.06	0.19	0.17	1.23	1.21	1.26	0.29	0.9	0.6	0.62	0.68	0.54
Am_Rn_000054	13068	GAU25735.1_hypothetical protein TSUD_216660 [Trifolium subterraneum]	AT1G73170.4_P-loop containing nucleoside triphosphate hydrolases superfamily protein	.	0.26	1.75333	0.313333	0.16	0.37	0	0.41	1.06	2.09	2.11	0	0.36	0.58	0.33	0.15	0
Am_Rn_000055	13040	PNX92532.1_retrotransposon-related protein [Trifolium pratense]	AT1G73170.4_P-loop containing nucleoside triphosphate hydrolases superfamily protein	.	0.313333	0.513333	0.196667	0.69	0.5	0.44	0	1.54	0	0	0.2	0.39	0	0.71	0.46	0.9
Am_Rn_000056	12966	BAG72151.1_hypothetical protein [Lotus japonicus]	AT3G61415.1_SKP1-like 21, GeneName=SK21	IPR021109_Aspartic peptidase domain superfamily; IPR016197_Chromo-like domain superfamily; IPR012337_Ribonuclease H-like superfamily; IPR041588_Integrase zinc-binding domain; IPR043502_DNA/RNA polymerase superfamily; IPR041577_Reverse transcriptase/retrotransposon-derived protein, RNase H-like domain; IPR023780_Chromo domain; IPR000477_Reverse transcriptase domain	1.73667	1.07667	0.746667	1.23333	2.85	1.46	0.9	1	1.26	0.97	0.35	1.05	0.84	0.82	1.17	1.71
Am_Rn_000057	12832	XP_004512131.1_transformation/transcription domain-associated protein [Cicer arietinum]	AT2G17930.1_Phosphatidylinositol 3- and 4-kinase family protein with FAT domain-containing protein	IPR016024_Armadillo-type fold	0	0	0	0	0	0	0	0	0	0	0	0	0	0	0	0
Am_Rn_000058	12774	XP_027188811.1_protein SUPPRESSOR OF QUENCHING 1, chloroplastic isoform X3 [Cicer arietinum]	AT1G56500.2_haloacid dehalogenase-like hydrolase family protein	IPR041492_Haloacid dehalogenase-like hydrolase; IPR006439_HAD hydrolase, subfamily IA; IPR036412_HAD-like superfamily	0.03	0.486667	0.403333	0.19	0	0.09	0	1.04	0.04	0.38	0.16	1.05	0	0	0.31	0.26
Am_Rn_000059	12711	XP_004512131.1_transformation/transcription domain-associated protein [Cicer arietinum]	AT2G17930.1_Phosphatidylinositol 3- and 4-kinase family protein with FAT domain-containing protein	IPR016024_Armadillo-type fold; IPR003152_FATC domain; IPR000403_Phosphatidylinositol 3-/4-kinase, catalytic domain; IPR003151_PIK-related kinase, FAT; IPR011009_Protein kinase-like domain superfamily	13.38	22.7067	11.9567	24.21	13.49	21.03	5.62	22.16	25.08	20.88	5.42	15.26	15.19	16.85	25.99	29.79
Am_Rn_000060	12698	XP_004495161.1_protein SPIRRIG isoform X1 [Cicer arietinum]	AT1G03060.1_BEACH-DOMAIN HOMOLOG A1, GeneName=SPI	IPR000409_BEACH domain; IPR036372_BEACH domain superfamily; IPR023362_PH-BEACH domain	1.1	0	0	0.0633333	1.24	0.42	1.64	0	0	0	0	0	0	0.19	0	0
Am_Rn_000061	12650	XP_013463247.2_ABC transporter C family member 14 isoform X1 [Medicago truncatula] XP_039686377.1 ABC transporter C family member 14 isoform X2 [Medicago truncatula] RHN73200.1 putative xenobiotic-transporting ATPase [Medicago truncatula]	AT3G62700.1_multidrug resistance-associated protein 10, GeneName=ABCC14	IPR011527_ABC transporter type 1, transmembrane domain; IPR003593_AAA+ ATPase domain; IPR003439_ABC transporter-like, ATP-binding domain; IPR036640_ABC transporter type 1, transmembrane domain superfamily; IPR027417_P-loop containing nucleoside triphosphate hydrolase	0.39	0.413333	0.343333	0.35	0.2	0.7	0.27	0.48	0.46	0.3	0.05	0.5	0.48	0.34	0.33	0.38
Am_Rn_000062	12600	XP_004495161.1_protein SPIRRIG isoform X1 [Cicer arietinum]	AT1G03060.1_BEACH-DOMAIN HOMOLOG A1, GeneName=SPI	IPR001680_WD40 repeat; IPR000409_BEACH domain; IPR036322_WD40-repeat-containing domain superfamily; IPR036372_BEACH domain superfamily; IPR023362_PH-BEACH domain	0.62	0.113333	0.0533333	0.266667	1.34	0.52	0	0.16	0.18	0	0	0.16	0	0.37	0	0.43
Am_Rn_000063	12589	XP_045801011.1_probable leucine-rich repeat receptor-like serine/threonine-protein kinase At3g14840 isoform X2 [Trifolium pratense]	AT3G14840.2_Leucine-rich repeat transmembrane protein kinase	IPR000719_Protein kinase domain; IPR021720_Malectin domain; IPR011009_Protein kinase-like domain superfamily	0.143333	2.52	3.25667	3.07	0.15	0.03	0.25	0.86	4.14	2.56	0.4	5.23	4.14	2.5	2.71	4
Am_Rn_000064	12579	TKY54291.1_Vacuolar protein sorting-associated protein 13C [Spatholobus suberectus]	AT1G48090.5_calcium-dependent lipid-binding family protein	IPR009543_Vacuolar protein sorting-associated protein 13, SHR-binding domain	0.63	0.923333	0.546667	0.733333	0.4	1.29	0.2	0.73	1.77	0.27	0.23	1.09	0.32	0.56	1.48	0.16
Am_Rn_000065	12560	RHN82321.1_putative RNA-directed DNA polymerase [Medicago truncatula]	AT4G23160.3_cysteine-rich RECEPTOR-like kinase, GeneName=CRK8	IPR036875_Zinc finger, CCHC-type superfamily; IPR001584_Integrase, catalytic core; IPR043502_DNA/RNA polymerase superfamily; IPR025724_GAG-pre-integrase domain; IPR012337_Ribonuclease H-like superfamily; IPR001878_Zinc finger, CCHC-type; IPR013103_Reverse transcriptase, RNA-dependent DNA polymerase	8.25667	0.98	1.04	1.99667	8.51	4.41	11.85	1.8	0.68	0.46	0.65	1.15	1.32	1.57	3.84	0.58
Am_Rn_000066	12510	KAH1206432.1_TMV resistance protein N [Glycine max]	AT5G36930.3_Disease resistance protein (TIR-NBS-LRR class) family	IPR002182_NB-ARC; IPR036390_Winged helix DNA-binding domain superfamily; IPR027417_P-loop containing nucleoside triphosphate hydrolase	0.47	1.21	0.326667	1.69	0.31	0.78	0.32	2.26	0.9	0.47	0.38	0.2	0.4	3.07	0.5	1.5
Am_Rn_000067	12510	BAG72151.1_hypothetical protein [Lotus japonicus]	AT3G63510.1_FMN-linked oxidoreductases superfamily protein	IPR021109_Aspartic peptidase domain superfamily; IPR016197_Chromo-like domain superfamily; IPR012337_Ribonuclease H-like superfamily; IPR041588_Integrase zinc-binding domain; IPR043502_DNA/RNA polymerase superfamily; IPR041577_Reverse transcriptase/retrotransposon-derived protein, RNase H-like domain; IPR023780_Chromo domain; IPR000477_Reverse transcriptase domain	0.0133333	0.186667	0.08	0.0666667	0	0.03	0.01	0.16	0.14	0.26	0.05	0.11	0.08	0.05	0.07	0.08
Am_Rn_000068	12477	XP_012575158.1_glutamate receptor 2.9-like isoform X1 [Cicer arietinum]	AT2G29100.1_glutamate receptor 2.9, GeneName=GLR2.9	IPR001320_Ionotropic glutamate receptor; IPR028082_Periplasmic binding protein-like I; IPR001828_Receptor, ligand binding region; IPR001638_Solute-binding protein family 3/N-terminal domain of MltF	0.43	1.43	0.65	0.98	0.37	0.54	0.38	1.42	1.89	0.98	0.34	0.86	0.75	0.97	1.21	0.76
Am_Rn_000069	12476	XP_045819740.1_serine/threonine-protein kinase SMG1-like isoform X2 [Trifolium pratense]	AT1G50030.2_target of rapamycin, GeneName=TOR	IPR011009_Protein kinase-like domain superfamily; IPR003152_FATC domain; IPR000403_Phosphatidylinositol 3-/4-kinase, catalytic domain	9.66	0.513333	0.783333	0.84	20.26	3.59	5.13	1.12	0	0.42	0	1.07	1.28	1.53	0	0.99
Am_Rn_000070	12464	XP_004497459.1_E3 ubiquitin-protein ligase UPL4 [Cicer arietinum] XP_004497460.1 E3 ubiquitin-protein ligase UPL4 [Cicer arietinum] XP_027189850.1 E3 ubiquitin-protein ligase UPL4 [Cicer arietinum]	AT5G02880.2_ubiquitin-protein ligase 4, GeneName=UPL4	IPR000569_HECT domain; IPR035983_HECT, E3 ligase catalytic domain	0.0433333	0.0566667	0.11	0.13	0	0.13	0	0	0.17	0	0	0.33	0	0.18	0	0.21
Am_Rn_000071	12449	XP_004512797.1_TMV resistance protein N [Cicer arietinum]	AT5G17680.1_disease resistance protein (TIR-NBS-LRR class)	IPR002182_NB-ARC; IPR036390_Winged helix DNA-binding domain superfamily; IPR027417_P-loop containing nucleoside triphosphate hydrolase	5.56667	3.60667	0.8	11.41	4.29	5.04	7.37	6.23	2.15	2.44	0.61	0.54	1.25	23.54	7.63	3.06
Am_Rn_000072	12432	PNY08578.1_condensin complex subunit 1-like protein [Trifolium pratense]	AT3G57060.2_binding protein	IPR007673_Condensin subunit 1; IPR032682_Condensin complex subunit 1, C-terminal; IPR024324_Condensin complex subunit 1, N-terminal; IPR016024_Armadillo-type fold	0.0733333	0.22	0.23	0.22	0.17	0	0.05	0.12	0.36	0.18	0	0.55	0.14	0.24	0.33	0.09
Am_Rn_000073	12418	XP_027188811.1_protein SUPPRESSOR OF QUENCHING 1, chloroplastic isoform X3 [Cicer arietinum]	AT1G56500.2_haloacid dehalogenase-like hydrolase family protein	IPR041492_Haloacid dehalogenase-like hydrolase; IPR006439_HAD hydrolase, subfamily IA; IPR036412_HAD-like superfamily	0.1	0.42	0.38	0.13	0.07	0.13	0.1	0.34	0.92	0	0.19	0.19	0.76	0	0.39	0
Am_Rn_000074	12384	XP_045819740.1_serine/threonine-protein kinase SMG1-like isoform X2 [Trifolium pratense]	AT1G50030.2_target of rapamycin, GeneName=TOR	IPR003152_FATC domain; IPR011009_Protein kinase-like domain superfamily; IPR031559_Serine/threonine-protein kinase SMG1; IPR000403_Phosphatidylinositol 3-/4-kinase, catalytic domain; IPR016024_Armadillo-type fold	10.9267	12.7833	6.83667	12.5867	12.66	13.94	6.18	12.53	13.22	12.6	1.74	9.05	9.72	8.77	13.04	15.95
Am_Rn_000075	12340	XP_004490460.1_E3 ubiquitin-protein ligase UPL1-like [Cicer arietinum] XP_012568388.1 E3 ubiquitin-protein ligase UPL1-like [Cicer arietinum]	AT1G55860.1_LOW protein: E3 ubiquitin ligase-like protein, GeneName=UPL1	IPR015940_Ubiquitin-associated domain; IPR010309_E3 ubiquitin ligase, domain of unknown function DUF908; IPR016024_Armadillo-type fold; IPR009060_UBA-like superfamily; IPR010314_E3 ubiquitin ligase, domain of unknown function DUF913; IPR025527_HUWE1/Rev1, ubiquitin binding region	0.443333	0.356667	0.563333	0.226667	0.44	0.44	0.45	0.44	0.24	0.39	0.2	0.94	0.55	0.28	0.09	0.31
Am_Rn_000076	12286	XP_027188811.1_protein SUPPRESSOR OF QUENCHING 1, chloroplastic isoform X3 [Cicer arietinum]	AT1G56500.2_haloacid dehalogenase-like hydrolase family protein	IPR041492_Haloacid dehalogenase-like hydrolase; IPR006439_HAD hydrolase, subfamily IA; IPR036412_HAD-like superfamily	0.0133333	0.28	0.133333	0.4	0	0.04	0	0.16	0.34	0.34	0.07	0.15	0.18	0.69	0	0.51
Am_Rn_000077	12274	XP_020237991.1_E3 ubiquitin-protein ligase UPL3 [Cajanus cajan]	AT4G38600.1_HECT ubiquitin protein ligase family protein KAK, GeneName=KAK	IPR000569_HECT domain; IPR016024_Armadillo-type fold; IPR035983_HECT, E3 ligase catalytic domain	0.6	0	0	0	1.8	0	0	0	0	0	0	0	0	0	0	0
Am_Rn_000078	12254	XP_029126265.1_uncharacterized protein LOC109793794 isoform X1 [Cajanus cajan]	.	IPR004242_Transposon, En/Spm-like	0.0733333	2.21333	0.343333	0.13	0.12	0.08	0.02	1.8	3.37	1.47	0.02	0.39	0.62	0	0.27	0.12
Am_Rn_000079	12244	XP_020237991.1_E3 ubiquitin-protein ligase UPL3 [Cajanus cajan]	AT4G38600.1_HECT ubiquitin protein ligase family protein KAK, GeneName=KAK	IPR000569_HECT domain; IPR016024_Armadillo-type fold; IPR035983_HECT, E3 ligase catalytic domain	3.06667	6.69333	5.44667	5.63	0	5.58	3.62	2.26	8.27	9.55	0.33	7.91	8.1	1.76	5.46	9.67
Am_Rn_000080	12240	XP_027346076.1_E3 ubiquitin-protein ligase UPL1-like isoform X1 [Abrus precatorius]	AT1G55860.1_LOW protein: E3 ubiquitin ligase-like protein, GeneName=UPL1	IPR015940_Ubiquitin-associated domain; IPR009060_UBA-like superfamily; IPR025527_HUWE1/Rev1, ubiquitin binding region; IPR016024_Armadillo-type fold; IPR010314_E3 ubiquitin ligase, domain of unknown function DUF913; IPR010309_E3 ubiquitin ligase, domain of unknown function DUF908	0	0.156667	0.633333	0.266667	0	0	0	0	0	0.47	0	0	1.9	0	0	0.8
Am_Rn_000081	12232	XP_020237991.1_E3 ubiquitin-protein ligase UPL3 [Cajanus cajan]	AT4G38600.1_HECT ubiquitin protein ligase family protein KAK, GeneName=KAK	IPR000569_HECT domain; IPR016024_Armadillo-type fold; IPR035983_HECT, E3 ligase catalytic domain	0.283333	0.09	0.403333	0.266667	0	0.42	0.43	0	0.27	0	0.12	0	1.09	0.32	0.26	0.22
Am_Rn_000082	12196	XP_004495161.1_protein SPIRRIG isoform X1 [Cicer arietinum]	AT1G03060.1_BEACH-DOMAIN HOMOLOG A1, GeneName=SPI	IPR000409_BEACH domain; IPR036322_WD40-repeat-containing domain superfamily; IPR016024_Armadillo-type fold; IPR001680_WD40 repeat; IPR013320_Concanavalin A-like lectin/glucanase domain superfamily; IPR023362_PH-BEACH domain; IPR036372_BEACH domain superfamily	47.69	9.96333	11.6333	15.2367	80.61	25.63	36.83	8.18	11.34	10.37	7.97	13.78	13.15	12.09	14.45	19.17
Am_Rn_000083	12179	PNX81943.1_gag-pol polyprotein [Trifolium pratense]	AT3G50830.1_cold-regulated 413-plasma membrane 2, GeneName=COR413-PM2	IPR041588_Integrase zinc-binding domain; IPR001584_Integrase, catalytic core; IPR012337_Ribonuclease H-like superfamily	0.26	1.43333	0.323333	1	0.21	0.3	0.27	2.34	0.96	1	0.07	0.41	0.49	1.04	1.04	0.92
Am_Rn_000084	12141	XP_027346076.1_E3 ubiquitin-protein ligase UPL1-like isoform X1 [Abrus precatorius]	AT1G55860.1_LOW protein: E3 ubiquitin ligase-like protein, GeneName=UPL1	IPR000569_HECT domain; IPR010314_E3 ubiquitin ligase, domain of unknown function DUF913; IPR015940_Ubiquitin-associated domain; IPR035983_HECT, E3 ligase catalytic domain; IPR016024_Armadillo-type fold; IPR009060_UBA-like superfamily; IPR025527_HUWE1/Rev1, ubiquitin binding region	28.4133	36.7167	26.32	35.4433	35.33	31.93	17.98	33.62	41.65	34.88	5.75	39.32	33.89	21.92	35.05	49.36
Am_Rn_000085	12128	KHN21230.1_Retrovirus-related Pol polyprotein from transposon TNT 1-94, partial [Glycine soja]	AT4G23160.3_cysteine-rich RECEPTOR-like kinase, GeneName=CRK8	IPR001584_Integrase, catalytic core; IPR012337_Ribonuclease H-like superfamily; IPR025724_GAG-pre-integrase domain; IPR043502_DNA/RNA polymerase superfamily; IPR013103_Reverse transcriptase, RNA-dependent DNA polymerase	5.66	7.14	0.833333	3.03333	10.65	1.17	5.16	9.45	4.72	7.25	0.6	1.01	0.89	2.72	3.19	3.19
Am_Rn_000086	12118	XP_004512797.1_TMV resistance protein N [Cicer arietinum]	AT5G17680.1_disease resistance protein (TIR-NBS-LRR class)	IPR027417_P-loop containing nucleoside triphosphate hydrolase; IPR002182_NB-ARC; IPR036390_Winged helix DNA-binding domain superfamily	33.0767	37.5267	6.1	44.22	13.56	56.38	29.29	47.76	28.8	36.02	3.05	7.48	7.77	57.37	33.82	41.47
Am_Rn_000087	12099	RVW35763.1_Retrovirus-related Pol polyprotein from transposon TNT 1-94 [Vitis vinifera]	.	IPR012337_Ribonuclease H-like superfamily; IPR025724_GAG-pre-integrase domain	0.363333	0.566667	0.53	0.71	0.49	0.43	0.17	0.67	0.53	0.5	0.28	0.66	0.65	0.79	0.56	0.78
Am_Rn_000088	12096	XP_012569669.1_exportin-T [Cicer arietinum] XP_012569670.1 exportin-T [Cicer arietinum] XP_027188388.1 exportin-T [Cicer arietinum]	AT1G72560.1_ARM repeat superfamily protein, GeneName=PSD	IPR045546_Exportin-T, C-terminal domain; IPR016024_Armadillo-type fold; IPR013598_Exportin-1/Importin-beta-like	0.433333	0.33	0.163333	0.496667	0.85	0.44	0.01	0.57	0.38	0.04	0.19	0.22	0.08	0.82	0.58	0.09
Am_Rn_000089	12010	XP_004505684.1_uncharacterized protein LOC101490411 isoform X1 [Cicer arietinum] XP_012572708.1 uncharacterized protein LOC101490411 isoform X1 [Cicer arietinum] XP_027191168.1 uncharacterized protein LOC101490411 isoform X1 [Cicer arietinum]	AT4G30150.2_Urb2/Npa2 family protein	IPR018849_Nucleolar 27S pre-rRNA processing, Urb2/Npa2, C-terminal	1.75667	1.05	0.216667	0.796667	2.46	1.97	0.84	1.29	1.33	0.53	0.19	0.23	0.23	0.8	0.45	1.14
Am_Rn_000090	11979	XP_004501669.1_E3 ubiquitin-protein ligase UPL1-like isoform X1 [Cicer arietinum] XP_004501670.1 E3 ubiquitin-protein ligase UPL1-like isoform X1 [Cicer arietinum]	AT1G55860.1_LOW protein: E3 ubiquitin ligase-like protein, GeneName=UPL1	IPR015940_Ubiquitin-associated domain; IPR025527_HUWE1/Rev1, ubiquitin binding region; IPR000569_HECT domain; IPR010309_E3 ubiquitin ligase, domain of unknown function DUF908; IPR010314_E3 ubiquitin ligase, domain of unknown function DUF913; IPR016024_Armadillo-type fold; IPR009060_UBA-like superfamily; IPR035983_HECT, E3 ligase catalytic domain	9.69667	13.17	9.65667	13.0733	12.05	9.64	7.4	13.23	14.82	11.46	2.34	14.11	12.52	10.57	12.64	16.01
Am_Rn_000091	11960	XP_017239676.1_PREDICTED: uncharacterized protein LOC108212460 [Daucus carota subsp. sativus]	ATMG00860.1_DNA/RNA polymerases superfamily protein, GeneName=ORF158	IPR005162_Retrotransposon gag domain	1.40667	0.623333	0.2	0.29	3.09	0.79	0.34	0.62	0.73	0.52	0.06	0.26	0.28	0.16	0.33	0.38
Am_Rn_000092	11946	BAG72151.1_hypothetical protein [Lotus japonicus]	AT5G33406.1_hAT dimerization domain-containing protein / transposase-like protein	IPR021109_Aspartic peptidase domain superfamily; IPR016197_Chromo-like domain superfamily; IPR012337_Ribonuclease H-like superfamily; IPR041588_Integrase zinc-binding domain; IPR043502_DNA/RNA polymerase superfamily; IPR041577_Reverse transcriptase/retrotransposon-derived protein, RNase H-like domain; IPR023780_Chromo domain; IPR000477_Reverse transcriptase domain	0.06	0.106667	0.0666667	0.0333333	0.12	0.03	0.03	0.08	0.17	0.07	0	0.06	0.14	0.02	0.02	0.06
Am_Rn_000093	11916	XP_003601007.1_cation/H(+) antiporter 15 [Medicago truncatula] AES71258.1 cation/H+ exchanger 3 [Medicago truncatula] RHN68469.1 putative cation/H+ exchanger [Medicago truncatula]	AT2G43330.1_inositol transporter 1, GeneName=INT1	IPR036259_MFS transporter superfamily; IPR003663_Sugar/inositol transporter; IPR005828_Major facilitator, sugar transporter-like	0.553333	0.56	1.21	0.82	0.33	0.55	0.78	0.52	0.52	0.64	0.66	1.39	1.58	1.19	0.77	0.5
Am_Rn_000094	11909	XP_045820380.1_uncharacterized protein LOC123913619 [Trifolium pratense]	AT5G28750.1_Bacterial sec-independent translocation protein mttA/Hcf106	IPR005162_Retrotransposon gag domain	0.213333	5.62	3.97	3.75	0.17	0.22	0.25	5.24	6.34	5.28	2.2	5.85	3.86	3.07	4.98	3.2
Am_Rn_000095	11844	BAG72151.1_hypothetical protein [Lotus japonicus]	AT5G33406.1_hAT dimerization domain-containing protein / transposase-like protein	IPR021109_Aspartic peptidase domain superfamily; IPR016197_Chromo-like domain superfamily; IPR012337_Ribonuclease H-like superfamily; IPR041588_Integrase zinc-binding domain; IPR043502_DNA/RNA polymerase superfamily; IPR041577_Reverse transcriptase/retrotransposon-derived protein, RNase H-like domain; IPR023780_Chromo domain; IPR000477_Reverse transcriptase domain	0.01	0.0233333	0.02	0.0666667	0.01	0.02	0	0.05	0	0.02	0	0	0.06	0.02	0.18	0
Am_Rn_000096	11841	KYP41234.1_Retrovirus-related Pol polyprotein from transposon TNT 1-94 [Cajanus cajan]	AT1G74780.1_Nodulin-like / Major Facilitator Superfamily protein	IPR036259_MFS transporter superfamily; IPR011701_Major facilitator superfamily; IPR010658_Nodulin-like	0.45	0.443333	0.303333	0.423333	0.52	0.23	0.6	0.5	0.57	0.26	0.06	0.23	0.62	0.5	0.24	0.53
Am_Rn_000097	11819	PNY08578.1_condensin complex subunit 1-like protein [Trifolium pratense]	AT3G57060.2_binding protein	IPR007673_Condensin subunit 1; IPR032682_Condensin complex subunit 1, C-terminal; IPR024324_Condensin complex subunit 1, N-terminal; IPR016024_Armadillo-type fold	0.323333	1.04333	2.07333	2.11	0.33	0.5	0.14	0.95	1.29	0.89	1.58	1.99	2.65	1.7	1.41	3.22
Am_Rn_000098	11810	XP_004492654.1_BEACH domain-containing protein C2 isoform X1 [Cicer arietinum]	AT2G45540.1_WD-40 repeat family protein / beige-like protein	IPR001680_WD40 repeat; IPR031570_Neurobeachin/BDCP, DUF4704; IPR036322_WD40-repeat-containing domain superfamily; IPR000409_BEACH domain; IPR023362_PH-BEACH domain; IPR036372_BEACH domain superfamily	15.88	17.95	18.2633	21.49	13.36	20.55	13.73	13.39	21.49	18.97	9.08	23.46	22.25	16.37	19.7	28.4
Am_Rn_000099	11800	PNY10806.1_histone deacetylase [Trifolium pratense]	AT4G23160.3_cysteine-rich RECEPTOR-like kinase, GeneName=CRK8	IPR043502_DNA/RNA polymerase superfamily; IPR012337_Ribonuclease H-like superfamily; IPR025724_GAG-pre-integrase domain; IPR001584_Integrase, catalytic core; IPR013103_Reverse transcriptase, RNA-dependent DNA polymerase	1.26	8.09	6.62	6.47	0.99	1.99	0.8	6.78	11.8	5.69	10.58	6.14	3.14	6.35	6.11	6.95
Am_Rn_000100	11748	XP_004497459.1_E3 ubiquitin-protein ligase UPL4 [Cicer arietinum] XP_004497460.1 E3 ubiquitin-protein ligase UPL4 [Cicer arietinum] XP_027189850.1 E3 ubiquitin-protein ligase UPL4 [Cicer arietinum]	AT5G02880.1_ubiquitin-protein ligase 4, GeneName=UPL4	IPR000569_HECT domain; IPR035983_HECT, E3 ligase catalytic domain	0.646667	0.54	0.396667	0.666667	0.65	0.59	0.7	0.63	0.68	0.31	0.11	0.36	0.72	0.56	1	0.44
Am_Rn_000101	11724	XP_024017123.1_K(+) efflux antiporter 4 isoform X3 [Morus notabilis]	AT2G19600.1_K+ efflux antiporter 4, GeneName=KEA4	IPR006153_Cation/H+ exchanger	0.0433333	0.0133333	0.0333333	0.01	0.08	0.03	0.02	0	0	0.04	0	0.1	0	0.03	0	0
Am_Rn_000102	11715	XP_027188658.1_LOW QUALITY PROTEIN: uncharacterized protein LOC113785801 [Cicer arietinum]	AT1G26640.1_Amino acid kinase family protein	IPR005162_Retrotransposon gag domain; IPR021109_Aspartic peptidase domain superfamily; IPR000467_G-patch domain	0.0833333	0.846667	0.316667	0.486667	0.03	0.12	0.1	0.72	1.19	0.63	0.16	0.44	0.35	0.42	0.46	0.58
Am_Rn_000103	11710	GAU19116.1_hypothetical protein TSUD_79390 [Trifolium subterraneum]	AT2G41560.1_autoinhibited Ca(2+)-ATPase, isoform 4, GeneName=ACA4	IPR026960_Reverse transcriptase zinc-binding domain; IPR043502_DNA/RNA polymerase superfamily; IPR036691_Endonuclease/exonuclease/phosphatase superfamily; IPR000477_Reverse transcriptase domain	8.26	12.5833	4.13667	5.97	5.12	14.4	5.26	11.26	13.72	12.77	2.25	6.31	3.85	3.79	7.1	7.02
Am_Rn_000104	11699	XP_004501669.1_E3 ubiquitin-protein ligase UPL1-like isoform X1 [Cicer arietinum] XP_004501670.1 E3 ubiquitin-protein ligase UPL1-like isoform X1 [Cicer arietinum]	AT1G55860.1_LOW protein: E3 ubiquitin ligase-like protein, GeneName=UPL1	IPR000569_HECT domain; IPR015940_Ubiquitin-associated domain; IPR010309_E3 ubiquitin ligase, domain of unknown function DUF908; IPR009060_UBA-like superfamily; IPR035983_HECT, E3 ligase catalytic domain; IPR025527_HUWE1/Rev1, ubiquitin binding region; IPR016024_Armadillo-type fold; IPR010314_E3 ubiquitin ligase, domain of unknown function DUF913	18.4333	30.6567	21.9333	25.58	21.06	19.71	14.53	28.9	33.33	29.74	9.86	27.86	28.08	18.72	29.42	28.6
Am_Rn_000105	11686	PNX93614.1_retrovirus-related Pol polyprotein from transposon TNT 1-94 [Trifolium pratense]	AT4G23160.3_cysteine-rich RECEPTOR-like kinase, GeneName=CRK8	.	0.45	1.40333	1.41667	1.90667	0.34	0.7	0.31	1.4	1.5	1.31	0.67	1.73	1.85	1.26	2.22	2.24
Am_Rn_000106	11673	XP_004490460.1_E3 ubiquitin-protein ligase UPL1-like [Cicer arietinum] XP_012568388.1 E3 ubiquitin-protein ligase UPL1-like [Cicer arietinum]	AT1G55860.1_LOW protein: E3 ubiquitin ligase-like protein, GeneName=UPL1	IPR015940_Ubiquitin-associated domain; IPR016024_Armadillo-type fold; IPR000569_HECT domain; IPR009060_UBA-like superfamily; IPR010314_E3 ubiquitin ligase, domain of unknown function DUF913; IPR025527_HUWE1/Rev1, ubiquitin binding region; IPR010309_E3 ubiquitin ligase, domain of unknown function DUF908; IPR035983_HECT, E3 ligase catalytic domain	0.296667	0.106667	0	0.346667	0	0	0.89	0	0	0.32	0	0	0	0	0.34	0.7
Am_Rn_000107	11668	XP_027357100.1_protein NUCLEAR FUSION DEFECTIVE 4-like isoform X1 [Abrus precatorius] XP_027357109.1 protein NUCLEAR FUSION DEFECTIVE 4-like isoform X1 [Abrus precatorius] XP_027357117.1 protein NUCLEAR FUSION DEFECTIVE 4-like isoform X1 [Abrus precatorius] XP_027357123.1 protein NUCLEAR FUSION DEFECTIVE 4-like isoform X1 [Abrus precatorius] XP_027357124.1 protein NUCLEAR FUSION DEFECTIVE 4-like …	AT1G74780.1_Nodulin-like / Major Facilitator Superfamily protein	IPR036259_MFS transporter superfamily; IPR011701_Major facilitator superfamily; IPR010658_Nodulin-like	1.77667	0.286667	0.163333	1.31	0.15	2	3.18	0.57	0.16	0.13	0.17	0.15	0.17	3.4	0.27	0.26
Am_Rn_000108	11636	XP_004488855.1_uncharacterized protein LOC101507337 isoform X2 [Cicer arietinum]	AT1G17210.1_IAP-like protein 1, GeneName=ILP1	.	0.143333	0.383333	0.173333	0.23	0.15	0.13	0.15	0.62	0.28	0.25	0.04	0.28	0.2	0.14	0.37	0.18
Am_Rn_000109	11623	XP_004505684.1_uncharacterized protein LOC101490411 isoform X1 [Cicer arietinum] XP_012572708.1 uncharacterized protein LOC101490411 isoform X1 [Cicer arietinum] XP_027191168.1 uncharacterized protein LOC101490411 isoform X1 [Cicer arietinum]	AT4G15570.2_P-loop containing nucleoside triphosphate hydrolases superfamily protein, GeneName=MAA3	.	3.56667	4.74333	2.93	5.58333	5.45	3.67	1.58	4.59	5.32	4.32	1.9	3.25	3.64	4.69	5.78	6.28
Am_Rn_000110	11613	XP_027192668.1_uncharacterized protein LOC101511496 [Cicer arietinum]	.	IPR021109_Aspartic peptidase domain superfamily; IPR005162_Retrotransposon gag domain	1.34667	1.71	1.05333	1.25333	2.32	0.79	0.93	1.66	2.04	1.43	0.33	1.59	1.24	0.99	1.47	1.3
Am_Rn_000111	11595	XP_004490460.1_E3 ubiquitin-protein ligase UPL1-like [Cicer arietinum] XP_012568388.1 E3 ubiquitin-protein ligase UPL1-like [Cicer arietinum]	AT1G55860.1_LOW protein: E3 ubiquitin ligase-like protein, GeneName=UPL1	IPR015940_Ubiquitin-associated domain; IPR010309_E3 ubiquitin ligase, domain of unknown function DUF908; IPR009060_UBA-like superfamily; IPR016024_Armadillo-type fold; IPR010314_E3 ubiquitin ligase, domain of unknown function DUF913; IPR000569_HECT domain; IPR035983_HECT, E3 ligase catalytic domain; IPR025527_HUWE1/Rev1, ubiquitin binding region	62.8067	55.28	32.58	47.91	75.84	71.69	40.89	47.05	62.08	56.71	4.32	46.61	46.81	23.21	53.52	67
Am_Rn_000112	11560	XP_027188541.1_BEACH domain-containing protein C2 isoform X2 [Cicer arietinum]	AT2G45540.1_WD-40 repeat family protein / beige-like protein	IPR031570_Neurobeachin/BDCP, DUF4704; IPR023362_PH-BEACH domain	0.196667	0.15	0.13	0.106667	0.07	0.28	0.24	0.08	0.22	0.15	0.01	0.24	0.14	0.18	0.05	0.09
Am_Rn_000113	11531	XP_020237991.1_E3 ubiquitin-protein ligase UPL3 [Cajanus cajan]	AT4G38600.1_HECT ubiquitin protein ligase family protein KAK, GeneName=KAK	IPR000569_HECT domain; IPR016024_Armadillo-type fold; IPR035983_HECT, E3 ligase catalytic domain	1.10333	1.49	1.14667	1.05333	0.81	0.73	1.77	1.85	1.24	1.38	0.32	0.99	2.13	0.8	0.73	1.63
Am_Rn_000114	11529	XP_004504716.1_putative disease resistance protein RGA4 [Cicer arietinum]	AT4G20910.2_double-stranded RNA binding protein-related / DsRBD protein-like protein, GeneName=HEN1	IPR041118_Rx, N-terminal; IPR027417_P-loop containing nucleoside triphosphate hydrolase; IPR002182_NB-ARC	0.0533333	0.186667	0.306667	0.306667	0	0.07	0.09	0.14	0.29	0.13	0.13	0.49	0.3	0.32	0.27	0.33
Am_Rn_000115	11521	PNY03339.1_retrotransposon-related protein, partial [Trifolium pratense]	AT3G47990.4_SUGAR-INSENSITIVE 3, GeneName=SIS3	IPR021109_Aspartic peptidase domain superfamily	1.00667	2.70333	1.52	1.33667	1.97	0.59	0.46	3.14	2.03	2.94	1.12	1.6	1.84	1.28	1.96	0.77
Am_Rn_000116	11511	BAG72151.1_hypothetical protein [Lotus japonicus]	ATMG00860.1_DNA/RNA polymerases superfamily protein, GeneName=ORF158	IPR021109_Aspartic peptidase domain superfamily; IPR016197_Chromo-like domain superfamily; IPR012337_Ribonuclease H-like superfamily; IPR041588_Integrase zinc-binding domain; IPR043502_DNA/RNA polymerase superfamily; IPR041577_Reverse transcriptase/retrotransposon-derived protein, RNase H-like domain; IPR023780_Chromo domain; IPR000477_Reverse transcriptase domain	0.19	0.496667	0.376667	0.41	0.17	0.24	0.16	0.5	0.72	0.27	0.1	0.65	0.38	0.26	0.51	0.46
Am_Rn_000117	11498	XP_040870596.1_uncharacterized protein LOC121174734 [Glycine max]	AT1G50830.1_Aminotransferase-like, plant mobile domain family protein	IPR021109_Aspartic peptidase domain superfamily; IPR005162_Retrotransposon gag domain	0.31	0.606667	0.273333	0.46	0.6	0.21	0.12	0.63	0.69	0.5	0.07	0.37	0.38	0.41	0.53	0.44
Am_Rn_000118	11497	GAU19116.1_hypothetical protein TSUD_79390 [Trifolium subterraneum]	AT2G41560.1_autoinhibited Ca(2+)-ATPase, isoform 4, GeneName=ACA4	IPR026960_Reverse transcriptase zinc-binding domain; IPR043502_DNA/RNA polymerase superfamily; IPR036691_Endonuclease/exonuclease/phosphatase superfamily; IPR000477_Reverse transcriptase domain	0.343333	1.25333	0.593333	1.09	0.15	0.58	0.3	0.97	1.41	1.38	0.09	1.04	0.65	1.16	0.9	1.21
Am_Rn_000119	11481	XP_039683852.1_uncharacterized protein LOC112416600 [Medicago truncatula]	AT3G11660.1_NDR1/HIN1-like 1, GeneName=NHL1	IPR002156_Ribonuclease H domain; IPR000477_Reverse transcriptase domain; IPR012337_Ribonuclease H-like superfamily; IPR041577_Reverse transcriptase/retrotransposon-derived protein, RNase H-like domain; IPR043502_DNA/RNA polymerase superfamily	13.0667	26.39	42.47	20.8567	14.94	16.73	7.53	32.57	22.47	24.13	32.92	49.83	44.66	20.8	22.61	19.16
Am_Rn_000120	11466	XP_027192068.1_ATP-dependent (S)-NAD(P)H-hydrate dehydratase [Cicer arietinum]	AT5G19150.2_pfkB-like carbohydrate kinase family protein	IPR000477_Reverse transcriptase domain; IPR043502_DNA/RNA polymerase superfamily	0.946667	1.65	1.26	1.41333	0.65	1.56	0.63	1.61	1.57	1.77	1.66	1.83	0.29	1.54	1.37	1.33
Am_Rn_000121	11465	XP_027368736.1_probable flavin-containing monooxygenase 1 [Abrus precatorius]	AT1G19250.1_flavin-dependent monooxygenase 1, GeneName=FMO1	IPR013103_Reverse transcriptase, RNA-dependent DNA polymerase; IPR043502_DNA/RNA polymerase superfamily	0.136667	1.1	1.16	0.74	0.05	0.1	0.26	1.06	0.77	1.47	0.7	1.47	1.31	0.72	0.38	1.12
Am_Rn_000122	11458	MBA0582092.1_hypothetical protein [Gossypium raimondii]	AT1G52280.1_RAB GTPase homolog G3D, GeneName=RABG3d	.	7.33667	7.61667	7.83333	6.94	18.01	2.94	1.06	8.78	6.66	7.41	8.8	7.3	7.4	8.06	6.75	6.01
Am_Rn_000123	11334	XP_027187628.1_uncharacterized protein LOC101494533 [Cicer arietinum]	AT5G36930.3_Disease resistance protein (TIR-NBS-LRR class) family	IPR000157_Toll/interleukin-1 receptor homology (TIR) domain; IPR002182_NB-ARC; IPR027417_P-loop containing nucleoside triphosphate hydrolase; IPR035897_Toll/interleukin-1 receptor homology (TIR) domain superfamily	0.0766667	1.27333	0.276667	0.426667	0.1	0.1	0.03	1.16	1.7	0.96	0.04	0.43	0.36	0.16	0.53	0.59
Am_Rn_000124	11310	GAU26239.1_hypothetical protein TSUD_224300 [Trifolium subterraneum]	AT3G24255.5_RNA-directed DNA polymerase (reverse transcriptase)-related family protein	IPR026960_Reverse transcriptase zinc-binding domain; IPR000477_Reverse transcriptase domain; IPR002156_Ribonuclease H domain; IPR043502_DNA/RNA polymerase superfamily; IPR012337_Ribonuclease H-like superfamily	5.35333	3.52667	2.65	3.24	6.54	4.52	5	3.75	3.16	3.67	2.06	2.68	3.21	3.51	2.77	3.44
Am_Rn_000125	11276	XP_045818798.1_uncharacterized protein LOC123911434 isoform X2 [Trifolium pratense]	AT5G24740.2_vacuolar protein sorting-associated protein, putative (DUF1162)	IPR031642_VPS13, repeated coiled region; IPR031645_Vacuolar protein sorting-associated protein 13, C-terminal; IPR009543_Vacuolar protein sorting-associated protein 13, SHR-binding domain; IPR031646_Vacuolar protein sorting-associated protein 13, second N-terminal domain	21.2167	8.47	5.98	12.8467	27.4	21.8	14.45	8.03	9.23	8.15	2.73	7.29	7.92	10.64	13.88	14.02
Am_Rn_000126	11272	XP_027192068.1_ATP-dependent (S)-NAD(P)H-hydrate dehydratase [Cicer arietinum]	AT5G19150.2_pfkB-like carbohydrate kinase family protein	IPR000477_Reverse transcriptase domain; IPR043502_DNA/RNA polymerase superfamily	0.493333	3.10333	3.39	3.41667	0.77	0.52	0.19	2.76	3.54	3.01	3.34	2.98	3.85	3.01	3.51	3.73
Am_Rn_000127	11266	.	.	.	0.573333	1.65	1.41	2.10667	0.65	0.78	0.29	1.5	1.64	1.81	0.6	1.96	1.67	2.32	1.96	2.04
Am_Rn_000128	11256	XP_027192505.1_LOW QUALITY PROTEIN: midasin [Cicer arietinum]	AT1G67120.1_midasin-like protein	IPR040848_Midasin, AAA lid domain 7; IPR027417_P-loop containing nucleoside triphosphate hydrolase; IPR011704_ATPase, dynein-related, AAA domain	0.373333	2.14	1.69667	2.85333	0	1.12	0	1.01	4.09	1.32	0	3.09	2	0.6	7.96	0
Am_Rn_000129	11246	XP_045829554.1_trehalose-phosphate phosphatase A isoform X2 [Trifolium pratense] XP_045829555.1 trehalose-phosphate phosphatase A isoform X2 [Trifolium pratense] XP_045829556.1 trehalose-phosphate phosphatase A isoform X2 [Trifolium pratense] XP_045829557.1 trehalose-phosphate phosphatase A isoform X2 [Trifolium pratense]	AT5G51460.4_Haloacid dehalogenase-like hydrolase (HAD) superfamily protein, GeneName=ATTPPA	IPR003337_Trehalose-phosphatase; IPR036412_HAD-like superfamily	1.72333	1.97667	1.49	1.61	2.42	1.38	1.37	1.85	2.11	1.97	1.32	1.64	1.51	1.64	1.81	1.38
Am_Rn_000130	11245	XP_004489119.1_LOW QUALITY PROTEIN: protein SWEETIE [Cicer arietinum]	AT1G67140.3_HEAT repeat-containing protein, GeneName=SWEETIE	IPR016024_Armadillo-type fold	0.303333	0.496667	0.56	0.693333	0.29	0.3	0.32	0.51	0.61	0.37	0.24	1.06	0.38	0.62	0.69	0.77
Am_Rn_000131	11216	XP_004500526.1_PKS-NRPS hybrid synthetase CHGG_01239-like [Cicer arietinum]	AT3G48860.1_coiled-coil protein	IPR018289_MULE transposase domain	9.08333	0.97	3.4	2.38333	9.09	5.9	12.26	1.45	0.94	0.52	2.04	3.36	4.8	0.89	2.17	4.09
Am_Rn_000132	11170	PNY03339.1_retrotransposon-related protein, partial [Trifolium pratense]	AT3G52250.1_Duplicated homeodomain-like superfamily protein	IPR009057_Homeobox-like domain superfamily; IPR001005_SANT/Myb domain; IPR017930_Myb domain	0.543333	0.98	0.94	0.953333	0.52	0.7	0.41	0.77	1.32	0.85	0.26	1.19	1.37	0.83	0.91	1.12
Am_Rn_000133	11132	XP_004487086.2_helicase protein MOM1-like isoform X1 [Cicer arietinum]	AT1G08060.1_ATP-dependent helicase family protein, GeneName=MOM	IPR001650_Helicase, C-terminal; IPR027417_P-loop containing nucleoside triphosphate hydrolase; IPR000953_Chromo/chromo shadow domain; IPR016197_Chromo-like domain superfamily; IPR011011_Zinc finger, FYVE/PHD-type; IPR001965_Zinc finger, PHD-type; IPR000330_SNF2, N-terminal	0.883333	2.17667	2.78	3.64333	0.32	1.91	0.42	2.05	2.47	2.01	1.52	3.7	3.12	3.81	3.15	3.97
Am_Rn_000134	11101	XP_045808931.1_5&apos;-3&apos; exoribonuclease 4-like isoform X4 [Trifolium pratense]	AT1G54490.2_exoribonuclease 4, GeneName=XRN4	IPR041412_Xrn1, helical domain	0.03	0.416667	0.566667	0.126667	0	0.09	0	0.14	0.58	0.53	0.06	0.83	0.81	0.14	0	0.24
Am_Rn_000135	11099	XP_020237991.1_E3 ubiquitin-protein ligase UPL3 [Cajanus cajan]	AT4G38600.1_HECT ubiquitin protein ligase family protein KAK, GeneName=KAK	IPR000569_HECT domain; IPR016024_Armadillo-type fold; IPR035983_HECT, E3 ligase catalytic domain	0.1	0.69	0.31	0.366667	0	0.11	0.19	0	0.83	1.24	0	0.27	0.66	0	0.34	0.76
Am_Rn_000136	11087	XP_027189354.1_serine/threonine-protein kinase prpf4B [Cicer arietinum]	AT3G25840.2_Protein kinase superfamily protein	IPR000719_Protein kinase domain; IPR011009_Protein kinase-like domain superfamily	3.30333	4.19	3.94333	5.56	0.46	6	3.45	3.88	5.17	3.52	3.03	4.34	4.46	5.25	6.61	4.82
Am_Rn_000137	11046	XP_027192505.1_LOW QUALITY PROTEIN: midasin [Cicer arietinum]	AT1G67120.1_midasin-like protein	IPR027417_P-loop containing nucleoside triphosphate hydrolase; IPR011704_ATPase, dynein-related, AAA domain; IPR040848_Midasin, AAA lid domain 7; IPR036465_von Willebrand factor A-like domain superfamily	1.66	1.6	1.06	2.75	4.03	0	0.95	1.9	0	2.9	0.9	0.06	2.22	2.99	0.06	5.2
Am_Rn_000138	11041	KAH1067939.1_hypothetical protein GYH30_005792 [Glycine max]	ATMG00860.1_DNA/RNA polymerases superfamily protein, GeneName=ORF158	IPR041577_Reverse transcriptase/retrotransposon-derived protein, RNase H-like domain; IPR043502_DNA/RNA polymerase superfamily; IPR000477_Reverse transcriptase domain	0.986667	1.22	0.88	1.12	1.16	0.84	0.96	0.9	0.98	1.78	0.48	0.88	1.28	0.83	0.62	1.91
Am_Rn_000139	11036	KYP38573.1_Retrovirus-related Pol polyprotein from transposon TNT 1-94, partial [Cajanus cajan]	AT4G23160.3_cysteine-rich RECEPTOR-like kinase, GeneName=CRK8	IPR043502_DNA/RNA polymerase superfamily; IPR013103_Reverse transcriptase, RNA-dependent DNA polymerase; IPR001584_Integrase, catalytic core; IPR012337_Ribonuclease H-like superfamily; IPR036875_Zinc finger, CCHC-type superfamily; IPR025724_GAG-pre-integrase domain	0.153333	1.81667	0.59	0.596667	0.15	0.06	0.25	1.36	2.08	2.01	0.29	0.91	0.57	0.52	0.61	0.66
Am_Rn_000140	11005	XP_024634147.1_helicase SEN1 [Medicago truncatula]	AT1G65780.1_P-loop containing nucleoside triphosphate hydrolases superfamily protein	IPR041679_DNA2/NAM7 helicase-like, C-terminal; IPR045529_Domain of unknown function DUF6469; IPR041677_DNA2/NAM7 helicase, helicase domain; IPR027417_P-loop containing nucleoside triphosphate hydrolase	0.873333	2.19	0.87	1.39	0.76	0.91	0.95	1.91	2.02	2.64	0.52	1.15	0.94	1.29	1.57	1.31
Am_Rn_000141	10990	BAG72151.1_hypothetical protein [Lotus japonicus]	AT2G34900.2_Transcription factor GTE6, GeneName=IMB1	IPR021109_Aspartic peptidase domain superfamily; IPR016197_Chromo-like domain superfamily; IPR012337_Ribonuclease H-like superfamily; IPR041588_Integrase zinc-binding domain; IPR043502_DNA/RNA polymerase superfamily; IPR041577_Reverse transcriptase/retrotransposon-derived protein, RNase H-like domain; IPR023780_Chromo domain; IPR000477_Reverse transcriptase domain	0.0233333	0.00666667	0.0266667	0.0166667	0.02	0.04	0.01	0	0	0.02	0.02	0.06	0	0.02	0.03	0
Am_Rn_000142	10989	KZV25004.1_Cysteine-rich RLK (receptor-like protein kinase) 8 [Dorcoceras hygrometricum]	AT4G23160.3_cysteine-rich RECEPTOR-like kinase, GeneName=CRK8	IPR005162_Retrotransposon gag domain	0.136667	1.17667	0.606667	0.58	0.16	0.14	0.11	1.36	1.18	0.99	0.43	0.8	0.59	0.41	0.75	0.58
Am_Rn_000143	10973	RZB71032.1_LINE-1 retrotransposable element ORF2 protein [Glycine soja]	AT2G25737.1_Sulfite exporter TauE/SafE family protein	.	1.1	1.41333	1.08	1.25	0.66	0.33	2.31	2.09	0.72	1.43	0.56	1.21	1.47	2.08	1.04	0.63
Am_Rn_000144	10962	KHN21230.1_Retrovirus-related Pol polyprotein from transposon TNT 1-94, partial [Glycine soja]	AT3G14840.2_Leucine-rich repeat transmembrane protein kinase	IPR001584_Integrase, catalytic core; IPR012337_Ribonuclease H-like superfamily; IPR025724_GAG-pre-integrase domain; IPR043502_DNA/RNA polymerase superfamily; IPR013103_Reverse transcriptase, RNA-dependent DNA polymerase	0.11	0.18	0.0233333	0.06	0.25	0.06	0.02	0.28	0.11	0.15	0	0.04	0.03	0.05	0.08	0.05
Am_Rn_000145	10962	GAU48536.1_hypothetical protein TSUD_282880 [Trifolium subterraneum]	AT1G43760.1_DNAse I-like superfamily protein	IPR026960_Reverse transcriptase zinc-binding domain; IPR043502_DNA/RNA polymerase superfamily; IPR036691_Endonuclease/exonuclease/phosphatase superfamily; IPR000477_Reverse transcriptase domain	3.33667	1.35	2.2	3.29	0.43	8.3	1.28	1.08	1.67	1.3	0.69	3.4	2.51	2.51	3.36	4
Am_Rn_000146	10953	XP_004511497.1_pentatricopeptide repeat-containing protein At4g20770 [Cicer arietinum]	AT4G20770.1_Pentatricopeptide repeat (PPR) superfamily protein	IPR002885_Pentatricopeptide repeat	0.183333	1.20667	0.63	1.68667	0.15	0.3	0.1	0.87	1.65	1.1	0.41	0.8	0.68	1.12	2.17	1.77
Am_Rn_000147	10946	XP_014622155.1_uncharacterized protein LOC100818989 [Glycine max]	AT1G50830.1_Aminotransferase-like, plant mobile domain family protein	.	0.04	2.35333	1.69667	0.413333	0.04	0.08	0	0.14	6.24	0.68	1.62	2.34	1.13	0.45	0.79	0
Am_Rn_000148	10944	XP_012568428.1_mediator of RNA polymerase II transcription subunit 16-like isoform X4 [Cicer arietinum] XP_027186076.1 mediator of RNA polymerase II transcription subunit 16-like isoform X4 [Cicer arietinum]	AT4G04920.2_sensitive to freezing 6, GeneName=SFR6	IPR043502_DNA/RNA polymerase superfamily; IPR013103_Reverse transcriptase, RNA-dependent DNA polymerase	2.48667	4.04667	1.78667	5.70667	1.88	4.62	0.96	2.69	4.41	5.04	0.74	2.49	2.13	4.77	7.26	5.09
Am_Rn_000149	10941	GAU43000.1_hypothetical protein TSUD_188740 [Trifolium subterraneum]	AT4G23160.3_cysteine-rich RECEPTOR-like kinase, GeneName=CRK8	.	3.11	1.08667	1.66	0.903333	2.3	4.77	2.26	1.16	1.3	0.8	0.74	1.88	2.36	0.71	0.8	1.2
Am_Rn_000150	10931	XP_027186081.1_DExH-box ATP-dependent RNA helicase DExH14 isoform X2 [Cicer arietinum]	AT5G61140.2_U5 small nuclear ribonucleoprotein helicase	IPR004179_Sec63 domain; IPR014756_Immunoglobulin E-set; IPR014001_Helicase superfamily 1/2, ATP-binding domain; IPR027417_P-loop containing nucleoside triphosphate hydrolase; IPR036390_Winged helix DNA-binding domain superfamily; IPR011545_DEAD/DEAH box helicase domain; IPR001650_Helicase, C-terminal	0	0.39	0	0.22	0	0	0	0.69	0.25	0.23	0	0	0	0	0.43	0.23
Am_Rn_000151	10930	GAU26239.1_hypothetical protein TSUD_224300 [Trifolium subterraneum]	AT1G48430.1_Dihydroxyacetone kinase	IPR036691_Endonuclease/exonuclease/phosphatase superfamily	0.0866667	0.85	0.763333	0.876667	0.05	0.18	0.03	0.67	0.95	0.93	0.43	0.97	0.89	0.54	1.14	0.95
Am_Rn_000152	10917	KYP38573.1_Retrovirus-related Pol polyprotein from transposon TNT 1-94, partial [Cajanus cajan]	AT4G23160.3_cysteine-rich RECEPTOR-like kinase, GeneName=CRK8	IPR043502_DNA/RNA polymerase superfamily; IPR025724_GAG-pre-integrase domain; IPR013103_Reverse transcriptase, RNA-dependent DNA polymerase; IPR012337_Ribonuclease H-like superfamily; IPR036875_Zinc finger, CCHC-type superfamily; IPR001584_Integrase, catalytic core	0.233333	0.403333	0.06	0.136667	0.26	0.35	0.09	0.31	0.44	0.46	0.06	0.06	0.06	0.07	0.23	0.11
Am_Rn_000153	10907	MCH83164.1_hypothetical protein [Trifolium medium]	.	.	0.55	1.41667	1.22667	1.67	0.39	0.94	0.32	1.31	1.47	1.47	0.9	1.52	1.26	1.21	1.73	2.07
Am_Rn_000154	10906	XP_014622155.1_uncharacterized protein LOC100818989 [Glycine max]	AT1G50830.1_Aminotransferase-like, plant mobile domain family protein	.	0.666667	3.85	1.22667	1.76	0.73	1.01	0.26	2.07	6.19	3.29	0	2.02	1.66	0.95	3.46	0.87
Am_Rn_000155	10905	KYP38429.1_Retrotransposable element Tf2, partial [Cajanus cajan]	AT5G62810.1_peroxin 14, GeneName=PEX14	IPR005162_Retrotransposon gag domain	2.05333	4.75667	1.92	3.74333	1.27	2.7	2.19	5.46	5.22	3.59	0.61	2.6	2.55	2.86	4.14	4.23
Am_Rn_000156	10891	XP_013469402.1_pleiotropic drug resistance protein 2 [Medicago truncatula] KEH43440.1 drug resistance transporter-like ABC domain protein [Medicago truncatula] RHN81373.1 putative iron-chelate-transporting ATPase [Medicago truncatula]	AT2G36380.1_pleiotropic drug resistance 6, GeneName=ABCG34	IPR027417_P-loop containing nucleoside triphosphate hydrolase; IPR003439_ABC transporter-like, ATP-binding domain; IPR043926_ABC transporter family G domain; IPR013525_ABC-2 type transporter; IPR013581_Plant PDR ABC transporter associated; IPR029481_ABC-transporter, N-terminal domain; IPR003593_AAA+ ATPase domain	1.73	7.69333	2.87667	3.67667	2.18	1.6	1.41	9.48	6.88	6.72	1.65	4.11	2.87	3.06	4.14	3.83
Am_Rn_000157	10887	TKY54109.1_Chromatin structure-remodeling complex protein SYD [Spatholobus suberectus]	AT2G28290.5_P-loop containing nucleoside triphosphate hydrolases superfamily protein, GeneName=SYD	IPR029295_Snf2, ATP coupling domain; IPR001650_Helicase, C-terminal; IPR027417_P-loop containing nucleoside triphosphate hydrolase	0.343333	0.106667	0.1	0.196667	0.63	0	0.4	0	0	0.32	0	0	0.3	0.59	0	0
Am_Rn_000158	10879	BAG72152.1_hypothetical protein [Lotus japonicus]	ATMG00860.1_DNA/RNA polymerases superfamily protein, GeneName=ORF158	IPR005162_Retrotransposon gag domain; IPR021109_Aspartic peptidase domain superfamily	0.866667	2.12	1.24	0.89	0.41	0.9	1.29	3.84	1.29	1.23	0.58	1.72	1.42	2.09	0.39	0.19
Am_Rn_000159	10875	KHN21230.1_Retrovirus-related Pol polyprotein from transposon TNT 1-94, partial [Glycine soja]	AT4G23160.3_cysteine-rich RECEPTOR-like kinase, GeneName=CRK8	IPR001584_Integrase, catalytic core; IPR012337_Ribonuclease H-like superfamily; IPR025724_GAG-pre-integrase domain; IPR043502_DNA/RNA polymerase superfamily; IPR013103_Reverse transcriptase, RNA-dependent DNA polymerase	0.103333	0.233333	0.366667	0.473333	0	0.13	0.18	0.16	0.36	0.18	0.14	0.58	0.38	0.33	0.37	0.72
Am_Rn_000160	10872	XP_020202147.1_clathrin heavy chain 2 [Cajanus cajan] KYP73071.1 Clathrin heavy chain 1 [Cajanus cajan]	AT3G11130.1_Clathrin, heavy chain	IPR015348_Clathrin, heavy chain, linker, core motif; IPR016024_Armadillo-type fold; IPR022365_Clathrin, heavy chain, propeller repeat; IPR016341_Clathrin, heavy chain; IPR000547_Clathrin, heavy chain/VPS, 7-fold repeat; IPR016025_Clathrin heavy chain, N-terminal	0.986667	1.86	1.81	1.21	1.3	0.74	0.92	1.76	1.85	1.97	0.37	2.64	2.42	1.24	1.2	1.19
Am_Rn_000161	10871	PNX96991.1_retrotransposon-related protein [Trifolium pratense]	AT1G19110.1_inter-alpha-trypsin inhibitor heavy chain-like protein	IPR013103_Reverse transcriptase, RNA-dependent DNA polymerase; IPR043502_DNA/RNA polymerase superfamily	0.47	1.16	1.27	1.95	0.68	0.49	0.24	1.27	1.54	0.67	0.62	1.82	1.37	2.01	2.13	1.71
Am_Rn_000162	10867	KHN21230.1_Retrovirus-related Pol polyprotein from transposon TNT 1-94, partial [Glycine soja]	AT4G23160.3_cysteine-rich RECEPTOR-like kinase, GeneName=CRK8	IPR001584_Integrase, catalytic core; IPR012337_Ribonuclease H-like superfamily; IPR025724_GAG-pre-integrase domain; IPR043502_DNA/RNA polymerase superfamily; IPR013103_Reverse transcriptase, RNA-dependent DNA polymerase	0.643333	0.713333	0.43	0.606667	0.75	0.4	0.78	0.47	1.02	0.65	0.24	0.48	0.57	0.45	0.33	1.04
Am_Rn_000163	10865	PNX72392.1_copia-type polyprotein, partial [Trifolium pratense]	ATMG00810.1_DNA/RNA polymerases superfamily protein, GeneName=ORF240B	IPR001878_Zinc finger, CCHC-type; IPR012337_Ribonuclease H-like superfamily; IPR036875_Zinc finger, CCHC-type superfamily; IPR025724_GAG-pre-integrase domain; IPR001584_Integrase, catalytic core	0	0	0	0	0	0	0	0	0	0	0	0	0	0	0	0
Am_Rn_000164	10847	KYP38573.1_Retrovirus-related Pol polyprotein from transposon TNT 1-94, partial [Cajanus cajan]	AT4G23160.3_cysteine-rich RECEPTOR-like kinase, GeneName=CRK8	IPR043502_DNA/RNA polymerase superfamily; IPR013103_Reverse transcriptase, RNA-dependent DNA polymerase; IPR001584_Integrase, catalytic core; IPR012337_Ribonuclease H-like superfamily; IPR036875_Zinc finger, CCHC-type superfamily; IPR025724_GAG-pre-integrase domain	0.136667	0.0733333	0.0933333	0.0833333	0.05	0.06	0.3	0.08	0.09	0.05	0.05	0.06	0.17	0.08	0.1	0.07
Am_Rn_000165	10835	GAU30089.1_hypothetical protein TSUD_392450 [Trifolium subterraneum]	AT2G25530.1_AFG1-like ATPase family protein	IPR012337_Ribonuclease H-like superfamily; IPR016197_Chromo-like domain superfamily; IPR000477_Reverse transcriptase domain; IPR005162_Retrotransposon gag domain; IPR043502_DNA/RNA polymerase superfamily; IPR041577_Reverse transcriptase/retrotransposon-derived protein, RNase H-like domain; IPR041588_Integrase zinc-binding domain; IPR021109_Aspartic peptidase domain superfamily	0.283333	0.716667	0.476667	0.0133333	0.59	0	0.26	0.87	0.56	0.72	0	0.6	0.83	0.01	0.03	0
Am_Rn_000166	10834	BAG72152.1_hypothetical protein [Lotus japonicus]	ATMG00860.1_DNA/RNA polymerases superfamily protein, GeneName=ORF158	IPR005162_Retrotransposon gag domain; IPR021109_Aspartic peptidase domain superfamily	0.336667	1.00333	0.423333	0.326667	0.06	0	0.95	2.24	0	0.77	0.51	0	0.76	0.75	0	0.23
Am_Rn_000167	10808	XP_045812624.1_centromere-associated protein E-like isoform X2 [Trifolium pratense]	AT4G31570.6_nucleoporin	.	1.01	0.79	1.36333	1.43667	0.32	1.55	1.16	0.88	0.46	1.03	0.42	1.7	1.97	1.95	1.24	1.12
Am_Rn_000168	10804	XP_027360555.1_F-box/kelch-repeat protein At1g26930-like [Abrus precatorius] XP_027360556.1 F-box/kelch-repeat protein At1g26930-like [Abrus precatorius]	AT2G02870.3_Galactose oxidase/kelch repeat superfamily protein	IPR006652_Kelch repeat type 1; IPR015915_Kelch-type beta propeller	8.27	5.43667	10.0867	5.14333	4.48	5.9	14.43	4.3	4.69	7.32	1.17	12.93	16.16	6.8	4.8	3.83
Am_Rn_000169	10800	XP_024631312.1_rust resistance kinase Lr10 [Medicago truncatula] RHN77994.1 putative glycerophosphodiester phosphodiesterase, protein kinase RLK-Pelle-LRK10L-2 family [Medicago truncatula]	AT1G66910.2_Protein kinase superfamily protein	IPR011009_Protein kinase-like domain superfamily; IPR000719_Protein kinase domain	1.35	4.55	1.46	2.72333	1.73	1.39	0.93	3.97	5.44	4.24	0.9	1.91	1.57	4.09	2.26	1.82
Am_Rn_000170	10791	XP_004504003.1_uncharacterized protein LOC101511453 isoform X1 [Cicer arietinum]	AT4G39420.2_spatacsin carboxy-terminus protein	.	1.80667	1.16333	0.87	0.99	1.96	1.26	2.2	1.08	1.42	0.99	0.14	1.37	1.1	0.79	1.68	0.5
Am_Rn_000171	10788	RDX86603.1_putative protein C05D11.9 [Mucuna pruriens]	AT2G47300.2_ribonuclease Ps, GeneName=POP1	IPR009723_Pop1, N-terminal; IPR012590_POPLD domain	0.443333	0.483333	0.19	0.633333	0.56	0.6	0.17	0.56	0.21	0.68	0.06	0.25	0.26	0.45	0.62	0.83
Am_Rn_000172	10783	RYR74850.1_hypothetical protein Ahy_A02g009560 [Arachis hypogaea]	AT1G43760.1_DNAse I-like superfamily protein	IPR026960_Reverse transcriptase zinc-binding domain; IPR036691_Endonuclease/exonuclease/phosphatase superfamily; IPR043502_DNA/RNA polymerase superfamily; IPR000477_Reverse transcriptase domain	3.97	2.96667	2.49	1.94	5.81	1.95	4.15	3.73	4.29	0.88	3.1	3.48	0.89	2.52	2.64	0.66
Am_Rn_000173	10781	GAU46782.1_hypothetical protein TSUD_351810 [Trifolium subterraneum]	AT4G23160.3_cysteine-rich RECEPTOR-like kinase, GeneName=CRK8	IPR013103_Reverse transcriptase, RNA-dependent DNA polymerase; IPR012337_Ribonuclease H-like superfamily; IPR043502_DNA/RNA polymerase superfamily; IPR025724_GAG-pre-integrase domain; IPR001584_Integrase, catalytic core	0.06	2.10333	0.523333	0.24	0.06	0.12	0	3.72	2.59	0	0.64	0.93	0	0.4	0.31	0.01
Am_Rn_000174	10780	XP_004508316.1_chromatin structure-remodeling complex protein SYD isoform X2 [Cicer arietinum]	AT2G28290.5_P-loop containing nucleoside triphosphate hydrolases superfamily protein, GeneName=SYD	IPR027417_P-loop containing nucleoside triphosphate hydrolase; IPR000330_SNF2, N-terminal; IPR029295_Snf2, ATP coupling domain; IPR001650_Helicase, C-terminal; IPR014001_Helicase superfamily 1/2, ATP-binding domain	23.4733	33.2033	19.94	26.93	26.05	28.03	16.34	28.47	38.23	32.91	8.32	27.36	24.14	15.21	32.16	33.42
Am_Rn_000175	10762	XP_027189354.1_serine/threonine-protein kinase prpf4B [Cicer arietinum]	AT3G25840.2_Protein kinase superfamily protein	IPR000719_Protein kinase domain; IPR011009_Protein kinase-like domain superfamily	4.02333	2.99	1.64333	2.81	8.62	2.07	1.38	3.42	2.05	3.5	0.33	3.43	1.17	1.48	4.05	2.9
Am_Rn_000176	10758	XP_045795065.1_uncharacterized protein LOC123889669 [Trifolium pratense]	.	IPR041577_Reverse transcriptase/retrotransposon-derived protein, RNase H-like domain; IPR002156_Ribonuclease H domain; IPR043502_DNA/RNA polymerase superfamily; IPR000477_Reverse transcriptase domain; IPR012337_Ribonuclease H-like superfamily	0.323333	0.446667	0.183333	0.33	0.61	0.12	0.24	0.37	0.19	0.78	0.12	0.07	0.36	0.35	0.11	0.53
Am_Rn_000177	10736	XP_023874613.1_uncharacterized protein LOC111987139 [Quercus suber]	ATMG00750.1_GAG/POL/ENV polyprotein, GeneName=ORF119	IPR041588_Integrase zinc-binding domain; IPR001584_Integrase, catalytic core; IPR012337_Ribonuclease H-like superfamily; IPR000477_Reverse transcriptase domain; IPR041373_Reverse transcriptase, RNase H-like domain; IPR005162_Retrotransposon gag domain; IPR043502_DNA/RNA polymerase superfamily	4.24	2.68	2.71667	2.20667	7.55	1.04	4.13	2.63	3.22	2.19	1.4	3.83	2.92	2.27	2.72	1.63
Am_Rn_000178	10735	BAG72148.1_hypothetical protein [Lotus japonicus] BAG72153.1 hypothetical protein [Lotus japonicus]	ATMG00860.1_DNA/RNA polymerases superfamily protein, GeneName=ORF158	IPR021109_Aspartic peptidase domain superfamily; IPR005162_Retrotransposon gag domain; IPR041577_Reverse transcriptase/retrotransposon-derived protein, RNase H-like domain; IPR012337_Ribonuclease H-like superfamily; IPR000477_Reverse transcriptase domain; IPR043502_DNA/RNA polymerase superfamily; IPR023780_Chromo domain; IPR016197_Chromo-like domain superfamily; IPR041588_Integrase zinc-binding d…	0.866667	1.51667	1.41667	2.43	1.02	0.99	0.59	1.27	1.98	1.3	1.31	1.76	1.18	2.01	2.77	2.51
Am_Rn_000179	10730	XP_004512797.1_TMV resistance protein N [Cicer arietinum]	AT5G17680.1_disease resistance protein (TIR-NBS-LRR class)	IPR002182_NB-ARC; IPR036390_Winged helix DNA-binding domain superfamily; IPR027417_P-loop containing nucleoside triphosphate hydrolase	0	0	0	0	0	0	0	0	0	0	0	0	0	0	0	0
Am_Rn_000180	10716	XP_022637923.1_uncharacterized protein LOC106763556 [Vigna radiata var. radiata]	AT4G32480.1_sugar phosphate exchanger, putative (DUF506)	IPR000467_G-patch domain; IPR005162_Retrotransposon gag domain; IPR021109_Aspartic peptidase domain superfamily	1.54	0.746667	1.97667	0.163333	1.83	0.46	2.33	0.55	0.73	0.96	1.03	2.65	2.25	0.05	0.17	0.27
Am_Rn_000181	10709	XP_027359521.1_uncharacterized protein LOC113868150 isoform X1 [Abrus precatorius] XP_027359522.1 uncharacterized protein LOC113868150 isoform X1 [Abrus precatorius]	AT5G13950.4_nuclear factor kappa-B-binding protein	.	5.2	7.73667	3.84667	4.91333	9.7	2.92	2.98	7.56	7.72	7.93	2.94	4.12	4.48	4.73	4.92	5.09
Am_Rn_000182	10707	XP_020226197.1_uncharacterized protein LOC109807901 isoform X1 [Cajanus cajan]	AT4G23160.3_cysteine-rich RECEPTOR-like kinase, GeneName=CRK8	IPR025724_GAG-pre-integrase domain	0.13	0.54	0.396667	0.563333	0.19	0.16	0.04	0.33	0.81	0.48	0.1	0.49	0.6	0.38	0.65	0.66
Am_Rn_000183	10693	GAU26239.1_hypothetical protein TSUD_224300 [Trifolium subterraneum]	AT1G72330.2_alanine aminotransferase 2, GeneName=ALAAT2	IPR026960_Reverse transcriptase zinc-binding domain; IPR043502_DNA/RNA polymerase superfamily; IPR036691_Endonuclease/exonuclease/phosphatase superfamily; IPR012337_Ribonuclease H-like superfamily; IPR002156_Ribonuclease H domain; IPR000477_Reverse transcriptase domain	1.18667	0.626667	0.546667	0.7	1.38	0.7	1.48	0.65	0.72	0.51	0.26	0.41	0.97	0.43	0.51	1.16
Am_Rn_000184	10675	RHN69276.1_putative RNA-directed DNA polymerase [Medicago truncatula]	AT4G23160.3_cysteine-rich RECEPTOR-like kinase, GeneName=CRK8	IPR001584_Integrase, catalytic core; IPR043502_DNA/RNA polymerase superfamily; IPR025724_GAG-pre-integrase domain; IPR013103_Reverse transcriptase, RNA-dependent DNA polymerase; IPR012337_Ribonuclease H-like superfamily	0.00666667	0.00666667	0	0.00666667	0	0.01	0.01	0.01	0	0.01	0	0	0	0.02	0	0
Am_Rn_000185	10662	XP_004497717.1_uncharacterized protein LOC101500533 [Cicer arietinum]	AT1G35660.1_erythroid differentiation factor-like protein	.	0.47	1.01667	0.41	0.9	0.19	0.94	0.28	0.7	1.91	0.44	0.4	0.56	0.27	0.43	1.85	0.42
Am_Rn_000186	10660	XP_027342738.1_LEAF RUST 10 DISEASE-RESISTANCE LOCUS RECEPTOR-LIKE PROTEIN KINASE-like 2.1 isoform X1 [Abrus precatorius]	AT5G38260.1_Protein kinase superfamily protein	IPR032872_Wall-associated receptor kinase, C-terminal; IPR011009_Protein kinase-like domain superfamily; IPR025287_Wall-associated receptor kinase, galacturonan-binding domain; IPR000719_Protein kinase domain	0.473333	0.703333	0.22	1.00667	0.23	0.71	0.48	1.37	0.32	0.42	0.27	0.04	0.35	2.49	0.43	0.1
Am_Rn_000187	10652	XP_045808931.1_5&apos;-3&apos; exoribonuclease 4-like isoform X4 [Trifolium pratense]	AT1G54490.2_exoribonuclease 4, GeneName=XRN4	IPR041412_Xrn1, helical domain	0.143333	1.10667	0.45	1.14667	0.21	0.2	0.02	1.83	0.6	0.89	0.29	0.42	0.64	1.37	1.02	1.05
Am_Rn_000188	10634	TKY54109.1_Chromatin structure-remodeling complex protein SYD [Spatholobus suberectus]	AT2G28290.5_P-loop containing nucleoside triphosphate hydrolases superfamily protein, GeneName=SYD	IPR000330_SNF2, N-terminal; IPR027417_P-loop containing nucleoside triphosphate hydrolase; IPR001650_Helicase, C-terminal; IPR014001_Helicase superfamily 1/2, ATP-binding domain	2.71333	1.63	0.483333	0.77	6.61	1.03	0.5	2.63	1.37	0.89	0.58	0.27	0.6	0.66	0.91	0.74
Am_Rn_000189	10589	XP_028122056.1_uncharacterized protein LOC114319249 [Camellia sinensis]	ATCG00680.1_photosystem II reaction center protein B, GeneName=PSBB	IPR017486_Photosystem II CP47 reaction centre protein; IPR036001_Photosystem antenna protein-like superfamily; IPR000932_Photosystem antenna protein-like	0.13	2.32333	2.12333	0.46	0.11	0.07	0.21	4.9	1.21	0.86	0.83	3.85	1.69	0.25	0.77	0.36
Am_Rn_000190	10580	AES91771.2_SNF2 family amino-terminal protein [Medicago truncatula]	AT4G20840.1_FAD-binding Berberine family protein	IPR029295_Snf2, ATP coupling domain	2.85	3.47	4.02	7.3	0.26	3.77	4.52	2.38	3.84	4.19	3.77	2.48	5.81	6.01	6.64	9.25
Am_Rn_000191	10571	XP_012573671.2_LOW QUALITY PROTEIN: uncharacterized protein LOC101492923 [Cicer arietinum]	AT3G50380.3_vacuolar protein sorting-associated protein, putative (DUF1162)	.	0.0733333	0.363333	0.146667	0.116667	0.09	0.06	0.07	0.43	0.13	0.53	0.09	0.2	0.15	0.07	0.12	0.16
Am_Rn_000192	10568	XP_013469402.1_pleiotropic drug resistance protein 2 [Medicago truncatula] KEH43440.1 drug resistance transporter-like ABC domain protein [Medicago truncatula] RHN81373.1 putative iron-chelate-transporting ATPase [Medicago truncatula]	AT2G36380.1_pleiotropic drug resistance 6, GeneName=ABCG34	IPR043926_ABC transporter family G domain; IPR003439_ABC transporter-like, ATP-binding domain; IPR029481_ABC-transporter, N-terminal domain; IPR013581_Plant PDR ABC transporter associated; IPR027417_P-loop containing nucleoside triphosphate hydrolase; IPR003593_AAA+ ATPase domain; IPR013525_ABC-2 type transporter	0.04	1.6	0.966667	0.643333	0	0.07	0.05	2.26	1.33	1.21	0.74	0.84	1.32	0.6	0.6	0.73
Am_Rn_000193	10563	XP_027186081.1_DExH-box ATP-dependent RNA helicase DExH14 isoform X2 [Cicer arietinum]	AT5G61140.2_U5 small nuclear ribonucleoprotein helicase	IPR004179_Sec63 domain; IPR014756_Immunoglobulin E-set; IPR014001_Helicase superfamily 1/2, ATP-binding domain; IPR027417_P-loop containing nucleoside triphosphate hydrolase; IPR036390_Winged helix DNA-binding domain superfamily; IPR011545_DEAD/DEAH box helicase domain; IPR001650_Helicase, C-terminal	0.153333	0.536667	0.576667	1.11667	0	0.33	0.13	0.3	0.45	0.86	0.03	0.81	0.89	0.79	0.9	1.66
Am_Rn_000194	10537	XP_004513544.1_histone-lysine N-methyltransferase ATXR3-like [Cicer arietinum]	AT4G15180.1_SET domain protein 2, GeneName=SDG2	IPR001214_SET domain; IPR036047_F-box-like domain superfamily; IPR045606_Protein SET DOMAIN GROUP 2, C-terminal	0.706667	1.48333	1.35	1.41	0.3	1.29	0.53	2.58	0.45	1.42	1.04	1.7	1.31	2.43	0.98	0.82
Am_Rn_000195	10531	KAH0646953.1_hypothetical protein KY284_034837 [Solanum tuberosum]	ATMG00860.1_DNA/RNA polymerases superfamily protein, GeneName=ORF158	IPR043502_DNA/RNA polymerase superfamily; IPR000477_Reverse transcriptase domain; IPR041577_Reverse transcriptase/retrotransposon-derived protein, RNase H-like domain; IPR041588_Integrase zinc-binding domain	2.88	3.58	1.28	1.52667	4.17	1.31	3.16	2.67	4.06	4.01	0.67	1.77	1.4	0.98	2.05	1.55
Am_Rn_000196	10517	TKY73850.1_Zinc finger CCCH domain-containing protein 38 [Spatholobus suberectus]	AT3G18640.1_Zinc finger C-x8-C-x5-C-x3-H type family protein	IPR000571_Zinc finger, CCCH-type; IPR036855_Zinc finger, CCCH-type superfamily	0.8	1.47	0.993333	1.28	0.22	1.15	1.03	1.32	1.24	1.85	0.95	1.03	1	2.22	0.69	0.93
Am_Rn_000197	10515	PNY07558.1_gag-pol polyprotein [Trifolium pratense]	.	IPR012337_Ribonuclease H-like superfamily; IPR041588_Integrase zinc-binding domain; IPR002156_Ribonuclease H domain	0.87	0.83	0.483333	0.926667	1.81	0.11	0.69	1.49	0.12	0.88	0.41	0.21	0.83	1.63	0.15	1
Am_Rn_000198	10513	XP_012569867.1_DNA excision repair protein ERCC-1 [Cicer arietinum]	AT3G05210.1_nucleotide repair protein, GeneName=ERCC1	IPR004579_ERCC1/RAD10/SWI10 family; IPR011335_Restriction endonuclease type II-like	0.326667	0.106667	0.04	0.0433333	0	0.12	0.86	0	0.32	0	0	0.12	0	0	0.13	0
Am_Rn_000199	10512	XP_039683852.1_uncharacterized protein LOC112416600 [Medicago truncatula]	AT3G62550.1_Adenine nucleotide alpha hydrolases-like superfamily protein	IPR002156_Ribonuclease H domain; IPR000477_Reverse transcriptase domain; IPR012337_Ribonuclease H-like superfamily; IPR041577_Reverse transcriptase/retrotransposon-derived protein, RNase H-like domain; IPR043502_DNA/RNA polymerase superfamily	0.5	13.0467	0.113333	0.29	0.89	0.2	0.41	26.92	3.6	8.62	0.03	0.08	0.23	0.24	0.29	0.34
Am_Rn_000200	10506	XP_024631312.1_rust resistance kinase Lr10 [Medicago truncatula] RHN77994.1 putative glycerophosphodiester phosphodiesterase, protein kinase RLK-Pelle-LRK10L-2 family [Medicago truncatula]	AT1G66920.2_Protein kinase superfamily protein	IPR000719_Protein kinase domain; IPR025287_Wall-associated receptor kinase, galacturonan-binding domain; IPR011009_Protein kinase-like domain superfamily	0.403333	19.7633	1.94333	7.12667	0.42	0.61	0.18	16.68	19.75	22.86	1.17	1.54	3.12	9.07	3.66	8.65
Am_Rn_000201	10497	RZB71032.1_LINE-1 retrotransposable element ORF2 protein [Glycine soja]	AT2G25737.1_Sulfite exporter TauE/SafE family protein	.	0.553333	0.706667	0.53	1.05333	0.89	0.32	0.45	0.85	0.68	0.59	0.57	0.51	0.51	1.09	0.78	1.29
Am_Rn_000202	10475	XP_045819805.1_G-type lectin S-receptor-like serine/threonine-protein kinase At4g27290 isoform X2 [Trifolium pratense]	AT4G27290.2_S-locus lectin protein kinase family protein	IPR001480_Bulb-type lectin domain; IPR003609_PAN/Apple domain; IPR011009_Protein kinase-like domain superfamily; IPR001245_Serine-threonine/tyrosine-protein kinase, catalytic domain; IPR036426_Bulb-type lectin domain superfamily; IPR000858_S-locus glycoprotein domain	0.666667	19.6233	10.43	8.78667	0.37	1.17	0.46	16.41	20.99	21.47	5.07	13.2	13.02	9.05	6.33	10.98
Am_Rn_000203	10467	CAC43237.1_lipoxygenase [Sesbania rostrata]	AT1G17420.1_lipoxygenase 3, GeneName=LOX3	IPR036226_Lipoxigenase, C-terminal domain superfamily; IPR001024_PLAT/LH2 domain; IPR001246_Lipoxygenase, plant; IPR013819_Lipoxygenase, C-terminal; IPR036392_PLAT/LH2 domain superfamily	5.22667	4.33667	5.78667	12.8567	2.59	10.1	2.99	6.49	3.98	2.54	7.25	5.78	4.33	13.73	12.78	12.06
Am_Rn_000204	10459	RDX64251.1_Nuclear pore complex protein NUP1, partial [Mucuna pruriens]	AT3G10650.1_nuclear pore complex protein, GeneName=NUP1	.	1.41	2.80667	2.30333	3.23667	2.55	1.34	0.34	3.02	2.52	2.88	0.79	1.56	4.56	2.32	2.5	4.89
Am_Rn_000205	10455	RHN82321.1_putative RNA-directed DNA polymerase [Medicago truncatula]	AT4G23160.3_cysteine-rich RECEPTOR-like kinase, GeneName=CRK8	IPR036875_Zinc finger, CCHC-type superfamily; IPR001584_Integrase, catalytic core; IPR043502_DNA/RNA polymerase superfamily; IPR025724_GAG-pre-integrase domain; IPR012337_Ribonuclease H-like superfamily; IPR001878_Zinc finger, CCHC-type; IPR013103_Reverse transcriptase, RNA-dependent DNA polymerase	0.12	0.226667	0.0433333	0.0133333	0	0	0.36	0.11	0.18	0.39	0.06	0.02	0.05	0	0.02	0.02
Am_Rn_000206	10451	KZV25004.1_Cysteine-rich RLK (receptor-like protein kinase) 8 [Dorcoceras hygrometricum]	AT4G23160.3_cysteine-rich RECEPTOR-like kinase, GeneName=CRK8	IPR025724_GAG-pre-integrase domain; IPR043502_DNA/RNA polymerase superfamily; IPR001584_Integrase, catalytic core; IPR013103_Reverse transcriptase, RNA-dependent DNA polymerase; IPR029472_Retrotransposon Copia-like, N-terminal; IPR005162_Retrotransposon gag domain; IPR012337_Ribonuclease H-like superfamily	0.146667	1.21	0.993333	1.20333	0	0	0.44	0	1.47	2.16	0.36	0.42	2.2	1.41	1.13	1.07
Am_Rn_000207	10431	XP_027186081.1_DExH-box ATP-dependent RNA helicase DExH14 isoform X2 [Cicer arietinum]	AT5G61140.2_U5 small nuclear ribonucleoprotein helicase	IPR004179_Sec63 domain; IPR014756_Immunoglobulin E-set; IPR014001_Helicase superfamily 1/2, ATP-binding domain; IPR027417_P-loop containing nucleoside triphosphate hydrolase; IPR036390_Winged helix DNA-binding domain superfamily; IPR011545_DEAD/DEAH box helicase domain; IPR001650_Helicase, C-terminal	0.123333	0	0.0533333	0	0.12	0.25	0	0	0	0	0	0.16	0	0	0	0
Am_Rn_000208	10429	XP_027351357.1_uncharacterized protein LOC113862472 [Abrus precatorius]	AT4G27220.1_NB-ARC domain-containing disease resistance protein	IPR003593_AAA+ ATPase domain; IPR002182_NB-ARC; IPR027417_P-loop containing nucleoside triphosphate hydrolase	0.346667	0.353333	0.22	0.583333	0.5	0.21	0.33	0.26	0.31	0.49	0.05	0.36	0.25	0.41	0.64	0.7
Am_Rn_000209	10428	RYR44431.1_hypothetical protein Ahy_A08g040757 isoform C [Arachis hypogaea]	AT4G31120.2_SHK1 binding protein 1, GeneName=SKB1	IPR005162_Retrotransposon gag domain	0.143333	0.36	0.23	0.363333	0.1	0.25	0.08	0.32	0.5	0.26	0.12	0.32	0.25	0.39	0.42	0.28
Am_Rn_000210	10404	TKY69258.1_Mediator of RNA polymerase II transcription subunit 23 [Spatholobus suberectus]	AT1G23230.3_mediator of RNA polymerase II transcription subunit	IPR021629_Mediator complex, subunit Med23	0.29	0.873333	0.553333	0.576667	0.35	0.37	0.15	1.14	0.84	0.64	0.38	0.7	0.58	0.86	0.33	0.54
Am_Rn_000211	10393	XP_027192082.1_uncharacterized protein LOC101511453 isoform X2 [Cicer arietinum]	AT4G39420.2_spatacsin carboxy-terminus protein	IPR028107_Spatacsin, C-terminal domain	1.01667	0	0	0	0.86	0	2.19	0	0	0	0	0	0	0	0	0
Am_Rn_000212	10368	KYP38429.1_Retrotransposable element Tf2, partial [Cajanus cajan]	AT4G32010.1_HSI2-like 1, GeneName=HSL1	IPR043502_DNA/RNA polymerase superfamily; IPR016197_Chromo-like domain superfamily; IPR041588_Integrase zinc-binding domain; IPR012337_Ribonuclease H-like superfamily; IPR041373_Reverse transcriptase, RNase H-like domain; IPR023780_Chromo domain	0.726667	1.38	0.8	0.963333	0.6	0.86	0.72	1.55	1.65	0.94	0.36	0.98	1.06	1.08	1.03	0.78
Am_Rn_000213	10351	PNY10806.1_histone deacetylase [Trifolium pratense]	AT4G37930.1_serine transhydroxymethyltransferase 1, GeneName=SHM1	IPR012337_Ribonuclease H-like superfamily; IPR025724_GAG-pre-integrase domain; IPR043502_DNA/RNA polymerase superfamily; IPR001584_Integrase, catalytic core; IPR013103_Reverse transcriptase, RNA-dependent DNA polymerase	0.0166667	7.42667	1.07333	1.33333	0.03	0.02	0	8.95	6.66	6.67	0.38	1.74	1.1	1.45	1.23	1.32
Am_Rn_000214	10336	XP_027192082.1_uncharacterized protein LOC101511453 isoform X2 [Cicer arietinum]	AT4G39420.2_spatacsin carboxy-terminus protein	IPR028107_Spatacsin, C-terminal domain	20.22	11.96	8.81	11.76	22.92	15.73	22.01	12.34	11.57	11.97	3.19	12.27	10.97	9.96	10.64	14.68
Am_Rn_000215	10332	PNY14726.1_putative UDP-N-acetylglucosamine-peptide N-acetylglucosaminyltransferase SEC-like protein [Trifolium pratense]	AT3G04240.2_Tetratricopeptide repeat (TPR)-like superfamily protein, GeneName=SEC	IPR029489_O-GlcNAc transferase, C-terminal; IPR011990_Tetratricopeptide-like helical domain superfamily; IPR001440_Tetratricopeptide repeat 1; IPR019734_Tetratricopeptide repeat	2.42	0.33	0.0833333	0.0933333	2.78	0.1	4.38	0.45	0.14	0.4	0.09	0.16	0	0.09	0.1	0.09
Am_Rn_000216	10328	KZV25004.1_Cysteine-rich RLK (receptor-like protein kinase) 8 [Dorcoceras hygrometricum]	AT4G23160.3_cysteine-rich RECEPTOR-like kinase, GeneName=CRK8	IPR025724_GAG-pre-integrase domain; IPR043502_DNA/RNA polymerase superfamily; IPR001584_Integrase, catalytic core; IPR013103_Reverse transcriptase, RNA-dependent DNA polymerase; IPR029472_Retrotransposon Copia-like, N-terminal; IPR005162_Retrotransposon gag domain; IPR012337_Ribonuclease H-like superfamily	0.243333	2.55	1.40667	1.08333	0.32	0.41	0	4.98	1.5	1.17	0.45	2.97	0.8	0.92	1.23	1.1
Am_Rn_000217	10317	XP_027360555.1_F-box/kelch-repeat protein At1g26930-like [Abrus precatorius] XP_027360556.1 F-box/kelch-repeat protein At1g26930-like [Abrus precatorius]	AT2G02870.3_Galactose oxidase/kelch repeat superfamily protein	IPR006652_Kelch repeat type 1; IPR015915_Kelch-type beta propeller	29.15	15.23	22.52	15.45	14.27	34.25	38.93	17.51	11.73	16.45	15.85	27.76	23.95	17.32	14.32	14.71
Am_Rn_000218	10314	RDX86603.1_putative protein C05D11.9 [Mucuna pruriens]	AT2G47300.2_ribonuclease Ps, GeneName=POP1	IPR009723_Pop1, N-terminal; IPR012590_POPLD domain	0.22	0.193333	0.103333	0.373333	0.65	0	0.01	0	0.55	0.03	0	0.31	0	0	0.75	0.37
Am_Rn_000219	10286	XP_027366153.1_DNA excision repair protein ERCC-1 [Abrus precatorius]	AT3G05210.1_nucleotide repair protein, GeneName=ERCC1	IPR011335_Restriction endonuclease type II-like; IPR010994_RuvA domain 2-like; IPR004579_ERCC1/RAD10/SWI10 family	0.556667	0.226667	0.173333	0.406667	1.67	0	0	0.41	0	0.27	0.19	0	0.33	0.52	0	0.7
Am_Rn_000220	10263	XP_004514064.1_uncharacterized protein LOC101492288 isoform X1 [Cicer arietinum]	AT3G46920.1_kinase superfamily with octicosapeptide/Phox/Bem1p domain-containing protein	IPR000270_PB1 domain; IPR001245_Serine-threonine/tyrosine-protein kinase, catalytic domain; IPR000719_Protein kinase domain; IPR011009_Protein kinase-like domain superfamily	0.55	0.216667	0.296667	0.443333	0	1.02	0.63	0	0.43	0.22	0	0.89	0	0.16	0.9	0.27
Am_Rn_000221	10247	YP_009237616.1_ATPase subunit 1 [Medicago truncatula] AML26827.1 ATPase subunit 1 [Medicago truncatula]	ATMG01190.1_ATP synthase subunit 1, GeneName=ATP1	IPR000793_ATP synthase, alpha subunit, C-terminal; IPR005294_ATP synthase, F1 complex, alpha subunit; IPR004100_ATPase, F1/V1/A1 complex, alpha/beta subunit, N-terminal domain; IPR027417_P-loop containing nucleoside triphosphate hydrolase; IPR036121_ATPase, F1/V1/A1 complex, alpha/beta subunit, N-terminal domain superfamily; IPR000194_ATPase, F1/V1/A1 complex, alpha/beta subunit, nucleotide-bindi…	2.76667	2.09667	5.32	6.21667	2.82	3.14	2.34	2.7	1.42	2.17	10.98	2.78	2.2	13.69	2.4	2.56
Am_Rn_000222	10230	XP_025678867.1_uncharacterized protein LOC112778796 [Arachis hypogaea]	AT4G24160.2_alpha/beta-Hydrolases superfamily protein	IPR036691_Endonuclease/exonuclease/phosphatase superfamily; IPR000477_Reverse transcriptase domain; IPR043502_DNA/RNA polymerase superfamily	2.51	0.06	0.35	0	0.81	1.54	5.18	0.11	0.07	0	0.45	0.29	0.31	0	0	0
Am_Rn_000223	10216	XP_004501336.1_G-type lectin S-receptor-like serine/threonine-protein kinase SD2-5 [Cicer arietinum]	AT4G32300.1_S-domain-2 5, GeneName=SD2-5	IPR000719_Protein kinase domain; IPR011009_Protein kinase-like domain superfamily; IPR036426_Bulb-type lectin domain superfamily; IPR001480_Bulb-type lectin domain; IPR024171_S-receptor-like serine/threonine-protein kinase	0.52	0.383333	0.253333	0.613333	0.59	0.82	0.15	0.9	0.25	0	0.22	0.33	0.21	1.07	0.71	0.06
Am_Rn_000224	10211	PNX72392.1_copia-type polyprotein, partial [Trifolium pratense]	ATMG00810.1_DNA/RNA polymerases superfamily protein, GeneName=ORF240B	IPR001878_Zinc finger, CCHC-type; IPR012337_Ribonuclease H-like superfamily; IPR036875_Zinc finger, CCHC-type superfamily; IPR025724_GAG-pre-integrase domain; IPR001584_Integrase, catalytic core	0.296667	0	0	0	0	0.05	0.84	0	0	0	0	0	0	0	0	0
Am_Rn_000225	10200	TKY65440.1_Mediator of RNA polymerase II transcription subunit 12 [Spatholobus suberectus]	AT4G00450.2_RNA polymerase II transcription mediator, GeneName=CCT	IPR019035_Mediator complex, subunit Med12	0.0233333	0.586667	0.573333	0.483333	0.04	0	0.03	0.65	0.82	0.29	0.18	0.89	0.65	0.26	0.89	0.3
Am_Rn_000226	10178	XP_012571740.1_serine/threonine-protein kinase ATM isoform X2 [Cicer arietinum]	AT3G48190.2_Serine/Threonine-kinase ATM-like protein, GeneName=ATM	IPR016024_Armadillo-type fold	0.53	0.873333	0.84	1.02333	0.34	1.09	0.16	0.92	0	1.7	0	1.42	1.1	0.9	0	2.17
Am_Rn_000227	10176	XP_045811015.1_laccase-14-like [Trifolium pratense]	AT5G09360.1_laccase 14, GeneName=LAC14	IPR001117_Multicopper oxidase, type 1; IPR011706_Multicopper oxidase, C-terminal; IPR008972_Cupredoxin	0.55	0.293333	0.2	0.596667	1.19	0.22	0.24	0.21	0.28	0.39	0.06	0.17	0.37	0.4	0.44	0.95
Am_Rn_000228	10171	PNY07558.1_gag-pol polyprotein [Trifolium pratense]	.	IPR000477_Reverse transcriptase domain; IPR043502_DNA/RNA polymerase superfamily; IPR041577_Reverse transcriptase/retrotransposon-derived protein, RNase H-like domain; IPR005162_Retrotransposon gag domain	3.03667	4.98	3.28667	4.14	5.12	2.84	1.15	4.92	5.93	4.09	0.93	4.69	4.24	3.45	4.9	4.07
Am_Rn_000229	10156	XP_027357082.1_E3 ubiquitin-protein ligase UPL3-like isoform X1 [Abrus precatorius] XP_027357083.1 E3 ubiquitin-protein ligase UPL3-like isoform X2 [Abrus precatorius]	AT4G38600.1_HECT ubiquitin protein ligase family protein KAK, GeneName=KAK	IPR016024_Armadillo-type fold	0.173333	0.0966667	0.146667	0.126667	0	0.23	0.29	0	0	0.29	0.15	0.2	0.09	0	0.13	0.25
Am_Rn_000230	10154	XP_027905787.1_uncharacterized protein LOC114165341 [Vigna unguiculata]	AT4G15020.2_hAT transposon superfamily	IPR003656_Zinc finger, BED-type; IPR007021_Domain of unknown function DUF659; IPR012337_Ribonuclease H-like superfamily	6.27667	2.68	0.586667	1	17.05	1.14	0.64	3.5	2.44	2.1	0.42	0.88	0.46	1.17	0.88	0.95
Am_Rn_000231	10142	XP_004511695.1_uncharacterized protein LOC101504440 isoform X2 [Cicer arietinum]	AT4G17330.3_G2484-1 protein, GeneName=G2484-1	IPR008395_Agenet-like domain; IPR014002_Agenet domain, plant type	6.75667	16.0667	24.1967	28.7033	5.99	6.55	7.73	26.12	12.45	9.63	0.94	39.75	31.9	24.89	38.14	23.08
Am_Rn_000232	10124	XP_004501660.1_BEACH domain-containing protein B [Cicer arietinum]	AT1G58230.2_binding protein	IPR036372_BEACH domain superfamily; IPR031570_Neurobeachin/BDCP, DUF4704; IPR001680_WD40 repeat; IPR016024_Armadillo-type fold; IPR023362_PH-BEACH domain; IPR000409_BEACH domain; IPR036322_WD40-repeat-containing domain superfamily; IPR013320_Concanavalin A-like lectin/glucanase domain superfamily	19.1767	16.2667	10.5033	16.5667	25.13	19.3	13.1	14.67	18.14	15.99	3.04	14.05	14.42	12.11	17.33	20.26
Am_Rn_000233	10123	XP_012573671.2_LOW QUALITY PROTEIN: uncharacterized protein LOC101492923 [Cicer arietinum]	AT3G50380.2_vacuolar protein sorting-associated protein, putative (DUF1162)	IPR009543_Vacuolar protein sorting-associated protein 13, SHR-binding domain	2.44	13.04	5.53333	8.22	3.11	2.94	1.27	13.07	12.4	13.65	2.58	7.23	6.79	7.28	7.42	9.96
Am_Rn_000234	10112	XP_004505205.1_autophagy-related protein 2 isoform X1 [Cicer arietinum] XP_004505206.1 autophagy-related protein 2 isoform X1 [Cicer arietinum]	AT3G19190.2_autophagy 2, GeneName=ATG2	IPR026885_Autophagy-related protein 2, CAD motif; IPR026854_Vacuolar protein sorting-associated protein 13-like, N-terminal domain	0.8	0.49	0.456667	0.353333	0.38	0.56	1.46	0.41	0.56	0.5	0.16	0.52	0.69	0.34	0.41	0.31
Am_Rn_000235	10101	PNY06843.1_small subunit processome component-like protein [Trifolium pratense]	AT4G30990.1_ARM repeat superfamily protein	IPR011430_Down-regulated-in-metastasis protein	0.493333	0.95	0.863333	0.883333	0.9	0.44	0.14	1.24	0.76	0.85	0.51	1.03	1.05	0.8	0.7	1.15
Am_Rn_000236	10095	XP_004499912.1_DNA topoisomerase 2 [Cicer arietinum] XP_004517303.1 DNA topoisomerase 2 [Cicer arietinum]	AT3G23890.2_topoisomerase II, GeneName=TOPII	IPR003594_Histidine kinase/HSP90-like ATPase; IPR001154_DNA topoisomerase II, eukaryotic-type; IPR001241_DNA topoisomerase, type IIA; IPR013760_DNA topoisomerase, type IIA-like domain superfamily; IPR002205_DNA topoisomerase, type IIA, domain A; IPR036890_Histidine kinase/HSP90-like ATPase superfamily	1.82333	3.15667	2.73667	3.58667	2.36	1.89	1.22	3.88	2.69	2.9	3.34	2.44	2.43	4.23	3.08	3.45
Am_Rn_000237	10094	XP_027189354.1_serine/threonine-protein kinase prpf4B [Cicer arietinum]	AT3G25840.2_Protein kinase superfamily protein	IPR000719_Protein kinase domain; IPR011009_Protein kinase-like domain superfamily	3.56667	3.88333	1.3	2.16	7.81	1.88	1.01	2.93	5.54	3.18	0.62	1.19	2.09	0.56	3.56	2.36
Am_Rn_000238	10084	XP_045801011.1_probable leucine-rich repeat receptor-like serine/threonine-protein kinase At3g14840 isoform X2 [Trifolium pratense]	AT3G14840.2_Leucine-rich repeat transmembrane protein kinase	IPR000719_Protein kinase domain; IPR021720_Malectin domain; IPR011009_Protein kinase-like domain superfamily	8.35667	0.183333	0.383333	0	7.64	3	14.43	0	0.21	0.34	0	0.45	0.7	0	0	0
Am_Rn_000239	10079	KHN21230.1_Retrovirus-related Pol polyprotein from transposon TNT 1-94, partial [Glycine soja]	AT4G23160.3_cysteine-rich RECEPTOR-like kinase, GeneName=CRK8	IPR043502_DNA/RNA polymerase superfamily; IPR013103_Reverse transcriptase, RNA-dependent DNA polymerase	0.0766667	0.203333	0.13	0.0766667	0.09	0.09	0.05	0.35	0.11	0.15	0.03	0.19	0.17	0.07	0.05	0.11
Am_Rn_000240	10046	PNY09528.1_RNA-binding protein [Trifolium pratense]	AT2G41060.1_RNA-binding (RRM/RBD/RNP motifs) family protein	IPR000504_RNA recognition motif domain; IPR035979_RNA-binding domain superfamily	1.20333	1.86667	1.22333	2.33333	0.91	1.7	1	1.57	2.03	2	0.29	1.52	1.86	2.28	2	2.72
Am_Rn_000241	10040	XP_045787571.1_uncharacterized protein LOC123882956 isoform X1 [Trifolium pratense]	.	IPR002706_DNA-repair protein Xrcc1, N-terminal; IPR008979_Galactose-binding-like domain superfamily	0.516667	0.326667	0.166667	0.29	0.64	0.39	0.52	0.22	0.51	0.25	0.09	0.09	0.32	0.3	0.24	0.33
Am_Rn_000242	10028	XP_012571740.1_serine/threonine-protein kinase ATM isoform X2 [Cicer arietinum]	AT3G48190.2_Serine/Threonine-kinase ATM-like protein, GeneName=ATM	IPR011009_Protein kinase-like domain superfamily; IPR016024_Armadillo-type fold; IPR000403_Phosphatidylinositol 3-/4-kinase, catalytic domain; IPR003152_FATC domain	1.54	6.52667	2.21	7.63	1.95	2.21	0.46	5.86	9.04	4.68	1.21	2.57	2.85	4.95	7.94	10
Am_Rn_000243	10024	XP_027357100.1_protein NUCLEAR FUSION DEFECTIVE 4-like isoform X1 [Abrus precatorius] XP_027357109.1 protein NUCLEAR FUSION DEFECTIVE 4-like isoform X1 [Abrus precatorius] XP_027357117.1 protein NUCLEAR FUSION DEFECTIVE 4-like isoform X1 [Abrus precatorius] XP_027357123.1 protein NUCLEAR FUSION DEFECTIVE 4-like isoform X1 [Abrus precatorius] XP_027357124.1 protein NUCLEAR FUSION DEFECTIVE 4-like …	AT1G74780.1_Nodulin-like / Major Facilitator Superfamily protein	IPR036259_MFS transporter superfamily; IPR011701_Major facilitator superfamily; IPR010658_Nodulin-like	5.86	2.23333	2.00333	4.77333	2.21	10.42	4.95	1.98	2.11	2.61	1.32	2.25	2.44	4.86	4.71	4.75
Am_Rn_000244	10020	KAG7583819.1_Zinc finger CCHC-type superfamily [Arabidopsis suecica]	AT4G23160.3_cysteine-rich RECEPTOR-like kinase, GeneName=CRK8	IPR013103_Reverse transcriptase, RNA-dependent DNA polymerase; IPR043502_DNA/RNA polymerase superfamily	0.34	0.553333	0.346667	0.233333	0.54	0.27	0.21	0.82	0.42	0.42	0.6	0.15	0.29	0.23	0.28	0.19
Am_Rn_000245	10015	CAC43237.1_lipoxygenase [Sesbania rostrata]	AT1G17420.1_lipoxygenase 3, GeneName=LOX3	IPR036226_Lipoxigenase, C-terminal domain superfamily; IPR001024_PLAT/LH2 domain; IPR001246_Lipoxygenase, plant; IPR013819_Lipoxygenase, C-terminal; IPR036392_PLAT/LH2 domain superfamily	1.72667	0.626667	0.476667	1.57	0.63	1.07	3.48	0.25	1.26	0.37	0.26	0.34	0.83	0.95	2.29	1.47
Am_Rn_000246	10009	KYP76032.1_Retrovirus-related Pol polyprotein from transposon TNT 1-94 [Cajanus cajan]	AT3G07020.3_UDP-Glycosyltransferase superfamily protein, GeneName=SGT	IPR002213_UDP-glucuronosyl/UDP-glucosyltransferase	0.526667	0.706667	0.44	0.42	0.6	0.58	0.4	0.42	0.89	0.81	0.22	0.63	0.47	0.38	0.58	0.3
Am_Rn_000247	10003	GAU30089.1_hypothetical protein TSUD_392450 [Trifolium subterraneum]	AT2G25530.1_AFG1-like ATPase family protein	IPR012337_Ribonuclease H-like superfamily; IPR016197_Chromo-like domain superfamily; IPR000477_Reverse transcriptase domain; IPR005162_Retrotransposon gag domain; IPR043502_DNA/RNA polymerase superfamily; IPR041577_Reverse transcriptase/retrotransposon-derived protein, RNase H-like domain; IPR041588_Integrase zinc-binding domain; IPR021109_Aspartic peptidase domain superfamily	0	0.103333	0.186667	0.0133333	0	0	0	0.31	0	0	0.56	0	0	0.04	0	0
Am_Rn_000248	10001	XP_012571657.1_pentatricopeptide repeat-containing protein At4g31850, chloroplastic [Cicer arietinum] XP_012571658.1 pentatricopeptide repeat-containing protein At4g31850, chloroplastic [Cicer arietinum] XP_012571659.1 pentatricopeptide repeat-containing protein At4g31850, chloroplastic [Cicer arietinum] XP_027190422.1 pentatricopeptide repeat-containing protein At4g31850, chloroplastic [Cicer ar…	AT4G31860.2_Protein phosphatase 2C family protein	IPR002885_Pentatricopeptide repeat; IPR011990_Tetratricopeptide-like helical domain superfamily	0.31	0.393333	0.476667	0.183333	0.18	0.11	0.64	0.43	0.38	0.37	0.29	0.66	0.48	0.07	0.25	0.23
Am_Rn_000249	9995	XP_045786263.1_uncharacterized protein LOC123881587 [Trifolium pratense]	AT5G66810.3_Ran-binding protein in the microtubule-organising centre protein	IPR006595_CTLH, C-terminal LisH motif; IPR024964_CTLH/CRA C-terminal to LisH motif domain	0.15	0	0.236667	0	0	0	0.45	0	0	0	0.32	0.39	0	0	0	0
Am_Rn_000250	9990	GAU10196.1_hypothetical protein TSUD_418680, partial [Trifolium subterraneum]	AT5G57850.2_D-aminoacid aminotransferase-like PLP-dependent enzymes superfamily protein, GeneName=ADCL	IPR000477_Reverse transcriptase domain; IPR021109_Aspartic peptidase domain superfamily; IPR043502_DNA/RNA polymerase superfamily	0.613333	1.26667	2.44	1.61667	0.68	0.41	0.75	1.09	1	1.71	2.14	2.56	2.62	2.01	1.3	1.54
Am_Rn_000251	9988	XP_020237991.1_E3 ubiquitin-protein ligase UPL3 [Cajanus cajan]	AT4G38600.1_HECT ubiquitin protein ligase family protein KAK, GeneName=KAK	IPR016024_Armadillo-type fold	0.21	0.0366667	0.04	0.09	0	0.47	0.16	0	0.11	0	0.12	0	0	0.2	0.07	0
Am_Rn_000252	9984	GAU51986.1_hypothetical protein TSUD_417870, partial [Trifolium subterraneum]	.	IPR000477_Reverse transcriptase domain; IPR043502_DNA/RNA polymerase superfamily	0.52	1.58667	0.843333	0.643333	1.11	0.3	0.15	1.72	1.71	1.33	0.27	1.45	0.81	0.58	0.82	0.53
Am_Rn_000253	9978	TKY70749.1_Lon protease-like 2 [Spatholobus suberectus]	AT5G47040.1_lon protease 2, GeneName=LON2	IPR003593_AAA+ ATPase domain; IPR027417_P-loop containing nucleoside triphosphate hydrolase; IPR004815_Lon protease, bacterial/eukaryotic-type; IPR008269_Peptidase S16, Lon proteolytic domain; IPR020568_Ribosomal protein S5 domain 2-type fold; IPR003111_Lon, substrate-binding domain; IPR003959_ATPase, AAA-type, core; IPR027501_Lon protease homologue 2, peroxisomal; IPR015947_PUA-like superfamily	2.66667	18.1533	13.1767	9.32333	2.12	4.01	1.87	19.24	18.42	16.8	9.86	14.61	15.06	10.45	9.15	8.37
Am_Rn_000254	9974	KAG4381014.1_hypothetical protein GLYMA_15G060100v4 [Glycine max] KAH1145801.1 hypothetical protein GYH30_041487 [Glycine max]	AT5G64420.1_DNA polymerase V family	IPR007015_DNA polymerase V/Myb-binding protein 1A	0.323333	0.236667	0.206667	0.22	0.41	0.16	0.4	0.36	0.25	0.1	0.08	0.35	0.19	0.33	0.23	0.1
Am_Rn_000255	9974	PNY10806.1_histone deacetylase [Trifolium pratense]	AT4G23160.3_cysteine-rich RECEPTOR-like kinase, GeneName=CRK8	IPR013103_Reverse transcriptase, RNA-dependent DNA polymerase; IPR043502_DNA/RNA polymerase superfamily	0.143333	1.44333	1.24333	1.48	0.11	0.26	0.06	1.79	1.49	1.05	0.59	1.56	1.58	1.14	1.75	1.55
Am_Rn_000256	9929	KHN21230.1_Retrovirus-related Pol polyprotein from transposon TNT 1-94, partial [Glycine soja]	AT4G23160.3_cysteine-rich RECEPTOR-like kinase, GeneName=CRK8	IPR001584_Integrase, catalytic core; IPR012337_Ribonuclease H-like superfamily; IPR013103_Reverse transcriptase, RNA-dependent DNA polymerase; IPR025724_GAG-pre-integrase domain; IPR043502_DNA/RNA polymerase superfamily	0.283333	0.266667	0.213333	0.593333	0	0.51	0.34	0	0.55	0.25	0.34	0	0.3	0.81	0.97	0
Am_Rn_000257	9917	XP_014521995.1_uncharacterized protein LOC106778540 [Vigna radiata var. radiata]	.	IPR025452_Domain of unknown function DUF4218; IPR004242_Transposon, En/Spm-like; IPR025312_Domain of unknown function DUF4216	0.0133333	0.796667	0.2	0.226667	0.04	0	0	1.18	1.21	0	0.26	0.31	0.03	0.55	0.04	0.09
Am_Rn_000258	9915	XP_027347752.1_protein E6-like [Abrus precatorius]	AT2G33850.1_E6-like protein	.	0.17	0.276667	0.25	0.38	0	0.33	0.18	0.22	0.25	0.36	0.12	0.26	0.37	0.35	0.36	0.43
Am_Rn_000259	9887	XP_012570682.1_GRIP and coiled-coil domain-containing protein 2 [Cicer arietinum]	AT4G31570.6_nucleoporin	.	0.743333	0.413333	0.47	0.506667	0.39	0.61	1.23	0.43	0.44	0.37	0.33	0.26	0.82	0.75	0.33	0.44
Am_Rn_000260	9884	GAU26239.1_hypothetical protein TSUD_224300 [Trifolium subterraneum]	AT1G32127.2_plant viral-response family protein	IPR026960_Reverse transcriptase zinc-binding domain; IPR043502_DNA/RNA polymerase superfamily; IPR036691_Endonuclease/exonuclease/phosphatase superfamily; IPR012337_Ribonuclease H-like superfamily; IPR002156_Ribonuclease H domain; IPR000477_Reverse transcriptase domain	1.64	0.683333	0.846667	0.476667	0.39	1.15	3.38	0.95	0.18	0.92	0.55	1	0.99	0.72	0.28	0.43
Am_Rn_000261	9877	XP_039683852.1_uncharacterized protein LOC112416600 [Medicago truncatula]	AT3G62550.1_Adenine nucleotide alpha hydrolases-like superfamily protein	.	0.45	0.193333	0.0466667	0.383333	0.52	0.57	0.26	0.16	0.35	0.07	0	0	0.14	0	0.55	0.6
Am_Rn_000262	9877	GAU30026.1_hypothetical protein TSUD_161120 [Trifolium subterraneum]	AT2G43330.1_inositol transporter 1, GeneName=INT1	IPR043502_DNA/RNA polymerase superfamily; IPR026960_Reverse transcriptase zinc-binding domain; IPR000477_Reverse transcriptase domain	0.326667	1.64333	0.616667	1.07333	0.39	0.37	0.22	1.42	2.31	1.2	0.33	0.86	0.66	1.07	1.27	0.88
Am_Rn_000263	9870	XP_025703912.1_uncharacterized protein LOC112805796 [Arachis hypogaea]	AT4G29090.1_Ribonuclease H-like superfamily protein	IPR000477_Reverse transcriptase domain; IPR036691_Endonuclease/exonuclease/phosphatase superfamily	0.173333	0.496667	0.45	0.796667	0.15	0.07	0.3	0.54	0.41	0.54	0.25	0.55	0.55	1.07	0.75	0.57
Am_Rn_000264	9867	XP_045820380.1_uncharacterized protein LOC123913619 [Trifolium pratense]	.	IPR000477_Reverse transcriptase domain; IPR043502_DNA/RNA polymerase superfamily	0.906667	0.656667	0.123333	0.773333	1.86	0.55	0.31	0.46	0.8	0.71	0.07	0.12	0.18	0.6	0.77	0.95
Am_Rn_000265	9866	XP_045786263.1_uncharacterized protein LOC123881587 [Trifolium pratense]	AT5G66810.3_Ran-binding protein in the microtubule-organising centre protein	IPR024964_CTLH/CRA C-terminal to LisH motif domain; IPR006595_CTLH, C-terminal LisH motif	3.54	2.91	2.00667	2.09	3.76	2.29	4.57	2.64	3.26	2.83	0.33	2.64	3.05	1.62	2.3	2.35
Am_Rn_000266	9860	XP_027334834.1_UPF0481 protein At3g47200-like [Abrus precatorius]	AT2G44930.1_transmembrane protein, putative (DUF247)	IPR012438_Protein of unknown function DUF1639	1.28333	2.8	1.48	2.33	1.26	0.7	1.89	3.4	1.61	3.39	0.92	1.1	2.42	2.86	1.72	2.41
Am_Rn_000267	9848	XP_045822044.1_uncharacterized protein LOC123914926 [Trifolium pratense]	AT3G62550.1_Adenine nucleotide alpha hydrolases-like superfamily protein	IPR005162_Retrotransposon gag domain; IPR043502_DNA/RNA polymerase superfamily; IPR000477_Reverse transcriptase domain	0.923333	0.906667	0.78	0.893333	1.12	0.92	0.73	0.59	1.11	1.02	0.19	1.23	0.92	0.35	0.91	1.42
Am_Rn_000268	9847	KYP42564.1_Retrovirus-related Pol polyprotein from transposon TNT 1-94 [Cajanus cajan]	AT1G68390.1_Core-2/I-branching beta-1,6-N-acetylglucosaminyltransferase family protein	IPR001584_Integrase, catalytic core; IPR025724_GAG-pre-integrase domain; IPR012337_Ribonuclease H-like superfamily	0.356667	0.666667	0.03	0.676667	1.07	0	0	2	0	0	0.05	0.02	0.02	2.03	0	0
Am_Rn_000269	9836	XP_004512178.1_aconitate hydratase 1 [Cicer arietinum]	AT4G35830.1_aconitase 1, GeneName=ACO1	IPR036008_Aconitase, iron-sulfur domain; IPR000573_Aconitase A/isopropylmalate dehydratase small subunit, swivel domain; IPR001030_Aconitase/3-isopropylmalate dehydratase large subunit, alpha/beta/alpha domain; IPR006249_Aconitase/Iron-responsive element-binding protein 2	6.48667	4.35667	1.57	0.973333	3.68	2.03	13.75	3.87	4.23	4.97	0.88	2.13	1.7	0.86	1.36	0.7
Am_Rn_000270	9834	PNY10806.1_histone deacetylase [Trifolium pratense]	AT4G23160.3_cysteine-rich RECEPTOR-like kinase, GeneName=CRK8	IPR043502_DNA/RNA polymerase superfamily; IPR001584_Integrase, catalytic core; IPR012337_Ribonuclease H-like superfamily; IPR025724_GAG-pre-integrase domain; IPR013103_Reverse transcriptase, RNA-dependent DNA polymerase	1.38333	1.33333	0.976667	2.02	0.25	2.39	1.51	1.1	1.51	1.39	0.55	1.1	1.28	3.5	1.03	1.53
Am_Rn_000271	9834	GAU24540.1_hypothetical protein TSUD_156530 [Trifolium subterraneum]	AT3G56340.1_Ribosomal protein S26e family protein	IPR026960_Reverse transcriptase zinc-binding domain	0.89	0.806667	0.273333	0.296667	1.29	0.85	0.53	0.65	0.61	1.16	0.23	0.33	0.26	0.13	0.41	0.35
Am_Rn_000272	9824	GAU13153.1_hypothetical protein TSUD_112140, partial [Trifolium subterraneum]	AT5G23390.1_polygalacturonase inhibitor (DUF639)	IPR012337_Ribonuclease H-like superfamily; IPR023780_Chromo domain; IPR041588_Integrase zinc-binding domain; IPR000953_Chromo/chromo shadow domain; IPR016197_Chromo-like domain superfamily	0.166667	0.863333	0.72	1.24667	0.14	0.26	0.1	0.6	1.07	0.92	0.72	0.81	0.63	1.63	1.31	0.8
Am_Rn_000273	9821	XP_045826094.1_G-type lectin S-receptor-like serine/threonine-protein kinase RKS1 [Trifolium pratense]	AT1G11410.1_S-locus lectin protein kinase family protein	IPR003609_PAN/Apple domain; IPR001480_Bulb-type lectin domain; IPR000858_S-locus glycoprotein domain; IPR001245_Serine-threonine/tyrosine-protein kinase, catalytic domain; IPR036426_Bulb-type lectin domain superfamily; IPR011009_Protein kinase-like domain superfamily	0.476667	0.33	0.256667	0.546667	0.03	1.08	0.32	0.25	0.41	0.33	0.16	0.35	0.26	0.56	0.57	0.51
Am_Rn_000274	9817	RDX65887.1_Protein ILITYHIA, partial [Mucuna pruriens]	AT1G64790.3_ILITYHIA, GeneName=ILA	IPR016024_Armadillo-type fold; IPR034085_TOG domain	0	0.373333	0.0933333	0.333333	0	0	0	0	0.61	0.51	0	0	0.28	0	0.56	0.44
Am_Rn_000275	9816	BAG72148.1_hypothetical protein [Lotus japonicus] BAG72153.1 hypothetical protein [Lotus japonicus]	ATMG00860.1_DNA/RNA polymerases superfamily protein, GeneName=ORF158	IPR000477_Reverse transcriptase domain; IPR043502_DNA/RNA polymerase superfamily; IPR021109_Aspartic peptidase domain superfamily; IPR023780_Chromo domain; IPR012337_Ribonuclease H-like superfamily; IPR005162_Retrotransposon gag domain; IPR000953_Chromo/chromo shadow domain; IPR041588_Integrase zinc-binding domain; IPR041577_Reverse transcriptase/retrotransposon-derived protein, RNase H-like doma…	0.64	0.95	0.96	0.993333	0	0.67	1.25	0.73	1.43	0.69	0	1.63	1.25	0.37	1.37	1.24
Am_Rn_000276	9805	XP_045820380.1_uncharacterized protein LOC123913619 [Trifolium pratense]	.	IPR012337_Ribonuclease H-like superfamily; IPR041588_Integrase zinc-binding domain; IPR001584_Integrase, catalytic core; IPR000477_Reverse transcriptase domain; IPR043502_DNA/RNA polymerase superfamily; IPR041577_Reverse transcriptase/retrotransposon-derived protein, RNase H-like domain; IPR002156_Ribonuclease H domain	1.69333	0.75	0.673333	3.35	2.16	2.92	0	0.81	0.22	1.22	0.36	0.77	0.89	4.11	2.8	3.14
Am_Rn_000277	9798	GAU10196.1_hypothetical protein TSUD_418680, partial [Trifolium subterraneum]	AT5G57850.2_D-aminoacid aminotransferase-like PLP-dependent enzymes superfamily protein, GeneName=ADCL	IPR000477_Reverse transcriptase domain; IPR021109_Aspartic peptidase domain superfamily; IPR043502_DNA/RNA polymerase superfamily	1.55	0.283333	0.196667	0.32	4.1	0.17	0.38	0.23	0.28	0.34	0.1	0.18	0.31	0.38	0.17	0.41
Am_Rn_000278	9792	PNX92532.1_retrotransposon-related protein [Trifolium pratense]	AT2G45540.1_WD-40 repeat family protein / beige-like protein	IPR021109_Aspartic peptidase domain superfamily; IPR000477_Reverse transcriptase domain; IPR043502_DNA/RNA polymerase superfamily	0.406667	0.71	0.3	0.503333	0.45	0.25	0.52	0.32	1.29	0.52	0.25	0.35	0.3	0.44	0.51	0.56
Am_Rn_000279	9788	RDX65887.1_Protein ILITYHIA, partial [Mucuna pruriens]	AT1G64790.3_ILITYHIA, GeneName=ILA	IPR016024_Armadillo-type fold; IPR034085_TOG domain	0.05	0.0633333	0.0733333	0.0666667	0.05	0.1	0	0.19	0	0	0	0.22	0	0.2	0	0
Am_Rn_000280	9779	XP_045820380.1_uncharacterized protein LOC123913619 [Trifolium pratense]	.	IPR012337_Ribonuclease H-like superfamily; IPR041588_Integrase zinc-binding domain; IPR001584_Integrase, catalytic core; IPR000477_Reverse transcriptase domain; IPR043502_DNA/RNA polymerase superfamily; IPR041577_Reverse transcriptase/retrotransposon-derived protein, RNase H-like domain; IPR002156_Ribonuclease H domain	0.343333	0.473333	0.243333	0.363333	0.36	0.13	0.54	0.42	0.7	0.3	0	0.17	0.56	0.37	0.16	0.56
Am_Rn_000281	9774	XP_034687654.1_G-type lectin S-receptor-like serine/threonine-protein kinase LECRK3 [Vitis riparia]	AT5G60900.1_receptor-like protein kinase 1, GeneName=RLK1	IPR001480_Bulb-type lectin domain; IPR024171_S-receptor-like serine/threonine-protein kinase; IPR000719_Protein kinase domain; IPR036426_Bulb-type lectin domain superfamily; IPR011009_Protein kinase-like domain superfamily	1.62667	1.19	1.18333	1.67667	1.82	1.48	1.58	1.15	1.43	0.99	0.89	1.22	1.44	1.66	2.19	1.18
Am_Rn_000282	9773	XP_027345912.1_DNA-directed RNA polymerase III subunit 1 [Abrus precatorius]	AT5G60040.1_nuclear RNA polymerase C1, GeneName=NRPC1	IPR007083_RNA polymerase Rpb1, domain 4; IPR006592_RNA polymerase, N-terminal; IPR007066_RNA polymerase Rpb1, domain 3; IPR000722_RNA polymerase, alpha subunit; IPR007080_RNA polymerase Rpb1, domain 1	0.0233333	0.486667	0.11	0.616667	0	0.07	0	0.35	0.68	0.43	0	0	0.33	0.18	0.92	0.75
Am_Rn_000283	9763	XP_012569778.1_histone-lysine N-methyltransferase SUVR4-like isoform X1 [Cicer arietinum]	AT5G44000.1_Glutathione S-transferase family protein	IPR018848_WIYLD domain; IPR001214_SET domain; IPR007728_Pre-SET domain	0.34	0.75	0.87	1.49333	0.36	0.5	0.16	0.85	0.69	0.71	0.41	0.97	1.23	1.62	1.62	1.24
Am_Rn_000284	9762	GAU48536.1_hypothetical protein TSUD_282880 [Trifolium subterraneum]	AT1G43760.1_DNAse I-like superfamily protein	IPR026960_Reverse transcriptase zinc-binding domain; IPR043502_DNA/RNA polymerase superfamily; IPR036691_Endonuclease/exonuclease/phosphatase superfamily; IPR000477_Reverse transcriptase domain	0.09	0.28	0.536667	0.136667	0	0.06	0.21	0.19	0.35	0.3	0.48	0.58	0.55	0.13	0.19	0.09
Am_Rn_000285	9755	XP_013469315.1_uncharacterized protein LOC25484854 isoform X1 [Medicago truncatula] KEH43353.1 UDP-glycosyltransferase family protein [Medicago truncatula] RHN81311.1 putative glycosyl transferase, family 1 [Medicago truncatula]	AT5G04480.2_UDP-Glycosyltransferase superfamily protein	.	2.52333	0.496667	0.503333	2.22667	0.28	2.39	4.9	0.62	0.37	0.5	0.35	0.69	0.47	5.14	0.59	0.95
Am_Rn_000286	9754	PNX93462.1_histone deacetylase, partial [Trifolium pratense]	AT4G23160.3_cysteine-rich RECEPTOR-like kinase, GeneName=CRK8	IPR043502_DNA/RNA polymerase superfamily; IPR013103_Reverse transcriptase, RNA-dependent DNA polymerase	0.196667	0.303333	0.286667	0.403333	0.24	0.2	0.15	0.28	0.35	0.28	0.23	0.35	0.28	0.39	0.43	0.39
Am_Rn_000287	9752	XP_039683852.1_uncharacterized protein LOC112416600 [Medicago truncatula]	AT3G62550.1_Adenine nucleotide alpha hydrolases-like superfamily protein	IPR002156_Ribonuclease H domain; IPR000477_Reverse transcriptase domain; IPR012337_Ribonuclease H-like superfamily; IPR041577_Reverse transcriptase/retrotransposon-derived protein, RNase H-like domain; IPR043502_DNA/RNA polymerase superfamily	0.0633333	0.69	0.0433333	0.0733333	0.02	0.02	0.15	0.97	0.3	0.8	0.03	0.07	0.03	0	0.03	0.19
Am_Rn_000288	9752	XP_024634147.1_helicase SEN1 [Medicago truncatula]	AT1G65780.1_P-loop containing nucleoside triphosphate hydrolases superfamily protein	IPR041679_DNA2/NAM7 helicase-like, C-terminal; IPR045529_Domain of unknown function DUF6469; IPR041677_DNA2/NAM7 helicase, helicase domain; IPR027417_P-loop containing nucleoside triphosphate hydrolase	0.8	0.516667	0.473333	0.673333	0.79	0.63	0.98	0.68	0.47	0.4	0.36	0.14	0.92	1.33	0.22	0.47
Am_Rn_000289	9742	XP_004503378.1_LEAF RUST 10 DISEASE-RESISTANCE LOCUS RECEPTOR-LIKE PROTEIN KINASE-like 2.3 [Cicer arietinum]	AT5G62790.1_1-deoxy-D-xylulose 5-phosphate reductoisomerase, GeneName=DXR	IPR032872_Wall-associated receptor kinase, C-terminal; IPR011009_Protein kinase-like domain superfamily; IPR025287_Wall-associated receptor kinase, galacturonan-binding domain; IPR000719_Protein kinase domain	0.323333	7.02667	1.04333	3.14333	0.03	0.64	0.3	5.21	6.11	9.76	0.29	1.42	1.42	4.53	2.36	2.54
Am_Rn_000290	9741	PNX92532.1_retrotransposon-related protein [Trifolium pratense]	AT2G45540.1_WD-40 repeat family protein / beige-like protein	IPR021109_Aspartic peptidase domain superfamily; IPR000477_Reverse transcriptase domain; IPR043502_DNA/RNA polymerase superfamily	0.18	0	0	0	0	0.54	0	0	0	0	0	0	0	0	0	0
Am_Rn_000291	9736	KEH27669.1_neutral alpha-glucosidase [Medicago truncatula]	AT3G23640.3_heteroglycan glucosidase 1, GeneName=HGL1	IPR001584_Integrase, catalytic core; IPR012337_Ribonuclease H-like superfamily; IPR025724_GAG-pre-integrase domain; IPR043502_DNA/RNA polymerase superfamily; IPR013103_Reverse transcriptase, RNA-dependent DNA polymerase	0.88	1.36	0.456667	1.32	1.23	0.99	0.42	1.48	1.48	1.12	0.25	0.52	0.6	0.78	1.58	1.6
Am_Rn_000292	9730	PNX93462.1_histone deacetylase, partial [Trifolium pratense]	AT4G23160.3_cysteine-rich RECEPTOR-like kinase, GeneName=CRK8	IPR001584_Integrase, catalytic core; IPR013103_Reverse transcriptase, RNA-dependent DNA polymerase; IPR043502_DNA/RNA polymerase superfamily; IPR025724_GAG-pre-integrase domain; IPR012337_Ribonuclease H-like superfamily	2.62667	1.99667	1.24333	1.83667	3.48	2.55	1.85	1.88	2.03	2.08	0.8	1.5	1.43	1.52	2.16	1.83
Am_Rn_000293	9729	XP_027350956.1_protein NRT1/ PTR FAMILY 6.1 [Abrus precatorius]	AT5G13400.1_Major facilitator superfamily protein	IPR000109_Proton-dependent oligopeptide transporter family; IPR036259_MFS transporter superfamily	0	0.146667	0.213333	0.23	0	0	0	0	0.18	0.26	0.37	0	0.27	0	0.41	0.28
Am_Rn_000294	9722	XP_004504714.1_small RNA 2&apos;-O-methyltransferase-like [Cicer arietinum] XP_027192009.1 small RNA 2&apos;-O-methyltransferase-like [Cicer arietinum]	AT4G20910.2_double-stranded RNA binding protein-related / DsRBD protein-like protein, GeneName=HEN1	IPR002182_NB-ARC; IPR041118_Rx, N-terminal; IPR027417_P-loop containing nucleoside triphosphate hydrolase	0	0.24	0.203333	0.206667	0	0	0	0.72	0	0	0.61	0	0	0.25	0.37	0
Am_Rn_000295	9704	RDX86281.1_S phase cyclin A-associated protein in the endoplasmic reticulum, partial [Mucuna pruriens]	AT5G61260.1_Plant calmodulin-binding protein-like protein	IPR032446_S phase cyclin A-associated protein in the endoplasmic reticulum, N-terminal	4.96333	2.92667	4.39	5.30333	1.6	8.76	4.53	2.87	2.5	3.41	3.54	5.13	4.5	4.6	5.86	5.45
Am_Rn_000296	9701	BAG72152.1_hypothetical protein [Lotus japonicus]	ATMG00860.1_DNA/RNA polymerases superfamily protein, GeneName=ORF158	IPR005162_Retrotransposon gag domain; IPR021109_Aspartic peptidase domain superfamily	0.126667	0.15	0.0633333	0.0633333	0.05	0.04	0.29	0.21	0	0.24	0.06	0.08	0.05	0.19	0	0
Am_Rn_000297	9700	XP_012572465.1_pentatricopeptide repeat-containing protein At5g18390, mitochondrial [Cicer arietinum]	AT5G18390.1_Pentatricopeptide repeat (PPR) superfamily protein	IPR002885_Pentatricopeptide repeat	0.273333	0.966667	0.876667	1.22333	0.2	0.53	0.09	0.91	1.23	0.76	0.22	1.04	1.37	1.02	1.11	1.54
Am_Rn_000298	9691	RDX74323.1_Protein CELLULOSE SYNTHASE INTERACTIVE 3, partial [Mucuna pruriens]	AT1G77460.3_CELLULOSE SYNTHASE INTERACTIVE 3	IPR016024_Armadillo-type fold; IPR000225_Armadillo	0	0.903333	1.54667	1.15333	0	0	0	0	2.71	0	1.32	3.32	0	1.19	2.27	0
Am_Rn_000299	9690	XP_004499322.1_ubiquitin-like domain-containing protein CIP73 isoform X2 [Cicer arietinum]	AT5G42220.1_Ubiquitin-like superfamily protein	IPR029071_Ubiquitin-like domain superfamily; IPR000626_Ubiquitin-like domain	6.29	7.90333	7.94667	8.85333	7.16	7.38	4.33	6.74	10.16	6.81	7.24	9.51	7.09	8.1	10.4	8.06
Am_Rn_000300	9689	MCH83668.1_retrotransposon protein [Trifolium medium]	.	IPR005162_Retrotransposon gag domain	0.153333	1.71333	0.746667	3.73333	0.29	0.17	0	1.06	2.21	1.87	0.27	0.82	1.15	3.3	3.04	4.86
Am_Rn_000301	9678	GAU51986.1_hypothetical protein TSUD_417870, partial [Trifolium subterraneum]	.	IPR000477_Reverse transcriptase domain; IPR043502_DNA/RNA polymerase superfamily	0.233333	2.32	0.183333	0.546667	0.37	0.3	0.03	1.65	3.04	2.27	0.04	0.13	0.38	0.45	0.26	0.93
Am_Rn_000302	9663	XP_021279280.1_LOW QUALITY PROTEIN: uncharacterized protein LOC110412945 [Herrania umbratica]	AT4G31500.1_cytochrome P450, family 83, subfamily B, polypeptide 1, GeneName=CYP83B1	IPR019557_Aminotransferase-like, plant mobile domain	0	5.22333	0	0	0	0	0	6.82	4.31	4.54	0	0	0	0	0	0
Am_Rn_000303	9660	KYP31853.1_Retrovirus-related Pol polyprotein from transposon TNT 1-94 [Cajanus cajan]	AT4G23160.3_cysteine-rich RECEPTOR-like kinase, GeneName=CRK8	IPR025287_Wall-associated receptor kinase, galacturonan-binding domain	0.0833333	1.50333	0.13	0.46	0.04	0.2	0.01	2.01	2.5	0	0.07	0.32	0	0.49	0.89	0
Am_Rn_000304	9653	BAG72151.1_hypothetical protein [Lotus japonicus]	AT2G46380.2_extra-large G-like protein, putative (DUF3133)	IPR016197_Chromo-like domain superfamily; IPR005162_Retrotransposon gag domain; IPR043502_DNA/RNA polymerase superfamily; IPR041588_Integrase zinc-binding domain; IPR041577_Reverse transcriptase/retrotransposon-derived protein, RNase H-like domain; IPR000477_Reverse transcriptase domain; IPR012337_Ribonuclease H-like superfamily	1.85667	2.12667	1.55	2.87	2.27	1.63	1.67	1.78	2.04	2.56	1.25	1.54	1.86	2.72	2.37	3.52
Am_Rn_000305	9651	KEH43285.1_DUF3595 family protein, partial [Medicago truncatula]	AT2G48060.2_piezo-type mechanosensitive ion channel component	IPR031334_Piezo non-specific cation channel, R-Ras-binding domain	1.05333	1.98	0.66	0.753333	0.73	0.67	1.76	1.79	2.09	2.06	0.2	0.9	0.88	0.76	0.77	0.73
Am_Rn_000306	9644	XP_027188384.1_uncharacterized protein LOC113785753 [Cicer arietinum]	AT4G35335.1_Nucleotide-sugar transporter family protein	IPR007271_Nucleotide-sugar transporter	0.17	0.573333	0.41	0.586667	0.19	0.22	0.1	0.58	0.77	0.37	0.09	0.64	0.5	0.53	0.88	0.35
Am_Rn_000307	9643	PNY01932.1_disease resistance protein (TIR-NBS-LRR class) [Trifolium pratense]	AT5G36930.3_Disease resistance protein (TIR-NBS-LRR class) family	IPR002182_NB-ARC; IPR027417_P-loop containing nucleoside triphosphate hydrolase; IPR036390_Winged helix DNA-binding domain superfamily	0.66	1.07333	0.71	1.29	0.67	0.69	0.62	0.81	1.73	0.68	0.73	0.94	0.46	1.74	1.46	0.67
Am_Rn_000308	9641	XP_027192463.1_kinesin-like protein KIN-12C isoform X2 [Cicer arietinum]	AT3G17360.3_phragmoplast orienting kinesin 1, GeneName=POK1	IPR001752_Kinesin motor domain; IPR027417_P-loop containing nucleoside triphosphate hydrolase	0	0	0	0.0966667	0	0	0	0	0	0	0	0	0	0	0.29	0
Am_Rn_000309	9636	XP_024634147.1_helicase SEN1 [Medicago truncatula]	AT3G02710.1_ARM repeat superfamily protein	IPR027417_P-loop containing nucleoside triphosphate hydrolase; IPR045529_Domain of unknown function DUF6469; IPR041677_DNA2/NAM7 helicase, helicase domain	0.133333	0.0533333	0	0	0.32	0	0.08	0	0.16	0	0	0	0	0	0	0
Am_Rn_000310	9627	PRQ52345.1_putative RNA-directed DNA polymerase [Rosa chinensis]	AT4G23160.3_cysteine-rich RECEPTOR-like kinase, GeneName=CRK8	IPR036875_Zinc finger, CCHC-type superfamily; IPR013103_Reverse transcriptase, RNA-dependent DNA polymerase; IPR025724_GAG-pre-integrase domain; IPR001584_Integrase, catalytic core; IPR012337_Ribonuclease H-like superfamily; IPR043502_DNA/RNA polymerase superfamily	0.876667	5.41667	1.91667	1.43667	0.36	2.01	0.26	7.1	4.2	4.95	1.32	2.24	2.19	1.8	1.15	1.36
Am_Rn_000311	9625	XP_027350956.1_protein NRT1/ PTR FAMILY 6.1 [Abrus precatorius]	AT5G13400.1_Major facilitator superfamily protein	IPR000109_Proton-dependent oligopeptide transporter family; IPR036259_MFS transporter superfamily	0.0466667	13.06	12.3333	12.72	0.1	0.04	0	4.66	17.27	17.25	9.48	14.37	13.15	13.63	8.36	16.17
Am_Rn_000312	9621	XP_012568314.1_ABC transporter C family member 2-like [Cicer arietinum] XP_012568316.1 ABC transporter C family member 2-like [Cicer arietinum] XP_012568318.1 ABC transporter C family member 2-like [Cicer arietinum] XP_012568323.1 ABC transporter C family member 2-like [Cicer arietinum]	AT2G34660.2_multidrug resistance-associated protein 2, GeneName=ABCC2	IPR036640_ABC transporter type 1, transmembrane domain superfamily; IPR027417_P-loop containing nucleoside triphosphate hydrolase; IPR003439_ABC transporter-like, ATP-binding domain; IPR011527_ABC transporter type 1, transmembrane domain; IPR003593_AAA+ ATPase domain	0.0733333	0	0	0.136667	0	0.01	0.21	0	0	0	0	0	0	0.41	0	0
Am_Rn_000313	9621	GAU47199.1_hypothetical protein TSUD_89080 [Trifolium subterraneum]	AT1G06720.1_P-loop containing nucleoside triphosphate hydrolases superfamily protein	IPR007034_Ribosome biogenesis protein BMS1/TSR1, C-terminal	2.88	0.426667	0.65	1.10333	5.25	1.8	1.59	0.14	0.54	0.6	0.21	0.92	0.82	1.18	0.91	1.22
Am_Rn_000314	9620	BAG72151.1_hypothetical protein [Lotus japonicus]	AT2G19450.1_membrane bound O-acyl transferase (MBOAT) family protein, GeneName=TAG1	IPR041577_Reverse transcriptase/retrotransposon-derived protein, RNase H-like domain; IPR043502_DNA/RNA polymerase superfamily; IPR000477_Reverse transcriptase domain	1.28	5.02	1.56	4.31333	0.49	2.95	0.4	6.45	6.01	2.6	0.74	2.32	1.62	4.13	6	2.81
Am_Rn_000315	9615	GAU51986.1_hypothetical protein TSUD_417870, partial [Trifolium subterraneum]	.	IPR000477_Reverse transcriptase domain; IPR043502_DNA/RNA polymerase superfamily	0.08	0.47	0.0933333	0.16	0.13	0.04	0.07	0.61	0.32	0.48	0.03	0.11	0.14	0.15	0.21	0.12
Am_Rn_000316	9612	GAU26239.1_hypothetical protein TSUD_224300 [Trifolium subterraneum]	AT3G21420.1_2-oxoglutarate (2OG) and Fe(II)-dependent oxygenase superfamily protein, GeneName=LBO1	IPR026992_Non-haem dioxygenase N-terminal domain; IPR044861_Isopenicillin N synthase-like, Fe(2+) 2OG dioxygenase domain	0.5	0.183333	0.93	1.14667	1.3	0.12	0.08	0.24	0.09	0.22	1.07	0.92	0.8	1.24	1.74	0.46
Am_Rn_000317	9608	PNY04535.1_NHL repeat-containing protein 2-like [Trifolium pratense]	AT1G56500.3_haloacid dehalogenase-like hydrolase family protein	IPR001258_NHL repeat	0.186667	0.136667	0.26	0.166667	0.28	0.1	0.18	0	0.14	0.27	0	0.09	0.69	0.1	0.27	0.13
Am_Rn_000318	9603	XP_004501538.1_metal transporter Nramp2-like [Cicer arietinum] XP_027190399.1 metal transporter Nramp2-like [Cicer arietinum]	AT1G47240.1_NRAMP metal ion transporter 2, GeneName=NRAMP2	IPR018289_MULE transposase domain	6.41	0.703333	0.456667	0.606667	4.77	12	2.46	0.97	0.44	0.7	0.33	0.38	0.66	0.4	0.42	1
Am_Rn_000319	9603	XP_004513544.1_histone-lysine N-methyltransferase ATXR3-like [Cicer arietinum]	AT4G15180.1_SET domain protein 2, GeneName=SDG2	IPR001214_SET domain; IPR045606_Protein SET DOMAIN GROUP 2, C-terminal; IPR036047_F-box-like domain superfamily	3.24333	9.44333	4.11333	7.85	3.7	3.81	2.22	8.34	11.6	8.39	0.81	5.73	5.8	6.26	10.6	6.69
Am_Rn_000320	9601	RHN71246.1_putative RNA-directed DNA polymerase [Medicago truncatula]	AT3G20780.1_topoisomerase 6 subunit B, GeneName=TOP6B	IPR001584_Integrase, catalytic core; IPR025724_GAG-pre-integrase domain; IPR012337_Ribonuclease H-like superfamily	2.7	0.923333	0.513333	1.26	2.22	1.61	4.27	1.61	0.54	0.62	0.43	0.43	0.68	2.39	0.59	0.8
Am_Rn_000321	9598	XP_014508793.1_zinc finger BED domain-containing protein DAYSLEEPER [Vigna radiata var. radiata] XP_014508794.1 zinc finger BED domain-containing protein DAYSLEEPER [Vigna radiata var. radiata]	AT3G42170.1_BED zinc finger and hAT dimerization domain-containing protein DAYSLEEPER, GeneName=DAYSLEEPER	IPR009009_RlpA-like protein, double-psi beta-barrel domain; IPR008906_HAT, C-terminal dimerisation domain; IPR036749_Expansin, cellulose-binding-like domain superfamily; IPR007117_Expansin, cellulose-binding-like domain; IPR007118_Expansin/Lol pI; IPR025525_hAT-like transposase, RNase-H fold; IPR036908_RlpA-like domain superfamily; IPR012337_Ribonuclease H-like superfamily	0.46	0.506667	0.7	0.736667	0.66	0.32	0.4	0.72	0.08	0.72	0.4	0.48	1.22	1.22	0.08	0.91
Am_Rn_000322	9596	RDX74323.1_Protein CELLULOSE SYNTHASE INTERACTIVE 3, partial [Mucuna pruriens]	AT1G77460.3_CELLULOSE SYNTHASE INTERACTIVE 3	IPR016024_Armadillo-type fold; IPR000225_Armadillo	0.513333	1.01	0.953333	3.17667	0.44	0.95	0.15	1.5	0.11	1.42	0	0	2.86	2.16	1.94	5.43
Am_Rn_000323	9589	GAU37589.1_hypothetical protein TSUD_365100 [Trifolium subterraneum]	AT5G19150.2_pfkB-like carbohydrate kinase family protein	IPR000477_Reverse transcriptase domain; IPR043502_DNA/RNA polymerase superfamily	0	0.0966667	0.0766667	0.0666667	0	0	0	0.06	0.11	0.12	0	0.14	0.09	0	0.11	0.09
Am_Rn_000324	9588	XP_012575158.1_glutamate receptor 2.9-like isoform X1 [Cicer arietinum]	AT2G29100.1_glutamate receptor 2.9, GeneName=GLR2.9	IPR001320_Ionotropic glutamate receptor; IPR028082_Periplasmic binding protein-like I; IPR001828_Receptor, ligand binding region; IPR001638_Solute-binding protein family 3/N-terminal domain of MltF	1.66667	0.0133333	0.03	0.123333	0.63	1.46	2.91	0.02	0	0.02	0.04	0.02	0.03	0.35	0	0.02
Am_Rn_000325	9583	XP_004504350.1_uncharacterized protein LOC101515132 [Cicer arietinum]	AT4G13750.1_Histidine kinase-, DNA gyrase B-, and HSP90-like ATPase family protein, GeneName=NOV	IPR036890_Histidine kinase/HSP90-like ATPase superfamily; IPR024975_Protein NO VEIN, C-terminal	5.46667	2.43	2.03667	3.91333	6.73	6.07	3.6	2.69	2.71	1.89	0.59	2.8	2.72	3.24	4.06	4.44
Am_Rn_000326	9577	XP_004501666.1_protein SABRE [Cicer arietinum]	AT1G58250.1_HYPERSENSITIVE TO PI STARVATION 4, GeneName=SAB	IPR019443_FMP27, C-terminal; IPR019441_FMP27, GFWDK domain	17.5267	18.6567	13.3133	18.9567	21.22	17.94	13.42	16.93	20.08	18.96	7.94	16.5	15.5	14.85	20.89	21.13
Am_Rn_000327	9567	XP_004504714.1_small RNA 2&apos;-O-methyltransferase-like [Cicer arietinum] XP_027192009.1 small RNA 2&apos;-O-methyltransferase-like [Cicer arietinum]	AT4G20910.2_double-stranded RNA binding protein-related / DsRBD protein-like protein, GeneName=HEN1	IPR040870_HEN1, double-stranded RNA binding domain 2; IPR013216_Methyltransferase type 11; IPR040813_Small RNA 2'-O-methyltransferase Hen1, La-motif C-terminal domain; IPR014720_Double-stranded RNA-binding domain; IPR029063_S-adenosyl-L-methionine-dependent methyltransferase	1.40667	1.13	2.52	3.04	1.23	2.17	0.82	0	1.86	1.53	2.15	2.94	2.47	3.27	2.31	3.54
Am_Rn_000328	9557	XP_045822044.1_uncharacterized protein LOC123914926 [Trifolium pratense]	AT5G42905.1_Polynucleotidyl transferase, ribonuclease H-like superfamily protein	IPR005162_Retrotransposon gag domain; IPR021109_Aspartic peptidase domain superfamily; IPR036875_Zinc finger, CCHC-type superfamily	1.00667	2.1	2.34	1.38	1.51	0.87	0.64	1.8	2.58	1.92	1.44	2.71	2.87	1.46	1.42	1.26
Am_Rn_000329	9509	BAG72151.1_hypothetical protein [Lotus japonicus]	ATMG00860.1_DNA/RNA polymerases superfamily protein, GeneName=ORF158	IPR041588_Integrase zinc-binding domain; IPR041373_Reverse transcriptase, RNase H-like domain; IPR043502_DNA/RNA polymerase superfamily; IPR012337_Ribonuclease H-like superfamily	1.65	8.50333	9.18667	7.30333	1.37	2.32	1.26	5.37	11.39	8.75	8.42	10.33	8.81	4.89	9.83	7.19
Am_Rn_000330	9505	RDX97424.1_hypothetical protein CR513_19805, partial [Mucuna pruriens]	.	.	0.926667	0.16	0.243333	0.123333	1.3	0.86	0.62	0.22	0.26	0	0.07	0.43	0.23	0.37	0	0
Am_Rn_000331	9501	XP_004514064.1_uncharacterized protein LOC101492288 isoform X1 [Cicer arietinum]	AT3G46920.1_kinase superfamily with octicosapeptide/Phox/Bem1p domain-containing protein	IPR000270_PB1 domain; IPR001245_Serine-threonine/tyrosine-protein kinase, catalytic domain; IPR000719_Protein kinase domain; IPR011009_Protein kinase-like domain superfamily	0.256667	0.403333	0.326667	0.68	0.37	0.4	0	0.41	0.22	0.58	0	0.45	0.53	0.11	1.37	0.56
Am_Rn_000332	9500	XP_003550797.1_dicer-like protein 4 isoform X1 [Glycine max] XP_028211600.1 dicer-like protein 4 isoform X1 [Glycine soja] KAG5097278.1 hypothetical protein JHK82_047132 [Glycine max] KAH1117805.1 hypothetical protein GYH30_046870 [Glycine max] KRH03544.1 hypothetical protein GLYMA_17G104100v4 [Glycine max] RZB56237.1 Dicer-like protein 4 isoform A [Glycine soja]	AT5G20320.1_dicer-like 4, GeneName=DCL4	IPR003100_PAZ domain; IPR000999_Ribonuclease III domain; IPR036389_Ribonuclease III, endonuclease domain superfamily; IPR014720_Double-stranded RNA-binding domain	0.486667	0.28	0.243333	0.506667	0.09	1.05	0.32	0.34	0.32	0.18	0.14	0.29	0.3	1	0.39	0.13
Am_Rn_000333	9498	XP_014521995.1_uncharacterized protein LOC106778540 [Vigna radiata var. radiata]	.	IPR038765_Papain-like cysteine peptidase superfamily; IPR003653_Ulp1 protease family, C-terminal catalytic domain; IPR004252_Probable transposase, Ptta/En/Spm, plant	0.293333	0.676667	0.36	0.746667	0.05	0.18	0.65	0.62	0.95	0.46	0.49	0.29	0.3	0.63	0.76	0.85
Am_Rn_000334	9494	XP_027192463.1_kinesin-like protein KIN-12C isoform X2 [Cicer arietinum]	AT3G17360.3_phragmoplast orienting kinesin 1, GeneName=POK1	IPR027417_P-loop containing nucleoside triphosphate hydrolase; IPR001752_Kinesin motor domain	0.0566667	0.566667	1.51333	1.02333	0.05	0.04	0.08	0.49	0.72	0.49	1.21	1.65	1.68	0.63	0.85	1.59
Am_Rn_000335	9493	RHN56355.1_putative protein kinase RLK-Pelle-DLSV family [Medicago truncatula]	AT4G23180.1_cysteine-rich RLK (RECEPTOR-like protein kinase) 10, GeneName=CRK10	IPR011009_Protein kinase-like domain superfamily; IPR001245_Serine-threonine/tyrosine-protein kinase, catalytic domain; IPR000719_Protein kinase domain	0.05	0.0466667	0	0.09	0	0.08	0.07	0.14	0	0	0	0	0	0.27	0	0
Am_Rn_000336	9491	XP_004497900.1_protein PHOTOPERIOD-INDEPENDENT EARLY FLOWERING 1 isoform X1 [Cicer arietinum]	AT3G12810.1_SNF2 domain-containing protein / helicase domain-containing protein, GeneName=PIE1	IPR000330_SNF2, N-terminal; IPR001650_Helicase, C-terminal; IPR014001_Helicase superfamily 1/2, ATP-binding domain; IPR027417_P-loop containing nucleoside triphosphate hydrolase	0.303333	0.826667	0.796667	0.663333	0.29	0.37	0.25	0.46	1.31	0.71	0.34	1.14	0.91	0.54	0.78	0.67
Am_Rn_000337	9490	XP_004504350.1_uncharacterized protein LOC101515132 [Cicer arietinum]	AT4G13750.1_Histidine kinase-, DNA gyrase B-, and HSP90-like ATPase family protein, GeneName=NOV	IPR024975_Protein NO VEIN, C-terminal; IPR036890_Histidine kinase/HSP90-like ATPase superfamily	0	0	0	0	0	0	0	0	0	0	0	0	0	0	0	0
Am_Rn_000338	9490	KHN21230.1_Retrovirus-related Pol polyprotein from transposon TNT 1-94, partial [Glycine soja]	AT4G23160.3_cysteine-rich RECEPTOR-like kinase, GeneName=CRK8	IPR001584_Integrase, catalytic core; IPR012337_Ribonuclease H-like superfamily; IPR013103_Reverse transcriptase, RNA-dependent DNA polymerase; IPR025724_GAG-pre-integrase domain; IPR043502_DNA/RNA polymerase superfamily	1.05333	0.52	0.493333	0.436667	1.43	0	1.73	0.98	0.25	0.33	0.64	0.46	0.38	0.37	0	0.94
Am_Rn_000339	9488	XP_004513544.1_histone-lysine N-methyltransferase ATXR3-like [Cicer arietinum]	AT4G15180.1_SET domain protein 2, GeneName=SDG2	IPR036047_F-box-like domain superfamily	4.37333	8.22333	4.13667	6.30333	5.8	5.01	2.31	7.73	9.16	7.78	1.54	5.14	5.73	2.37	5.52	11.02
Am_Rn_000340	9482	GAU48536.1_hypothetical protein TSUD_282880 [Trifolium subterraneum]	AT1G43760.1_DNAse I-like superfamily protein	IPR026960_Reverse transcriptase zinc-binding domain; IPR000477_Reverse transcriptase domain; IPR005135_Endonuclease/exonuclease/phosphatase; IPR043502_DNA/RNA polymerase superfamily; IPR036691_Endonuclease/exonuclease/phosphatase superfamily	1.55	2.66333	1.56333	1.77667	2.7	1.29	0.66	3.77	3.09	1.13	1.04	1.31	2.34	2.02	1.54	1.77
Am_Rn_000341	9480	BAG72152.1_hypothetical protein [Lotus japonicus]	AT1G30910.1_Molybdenum cofactor sulfurase family protein	IPR005162_Retrotransposon gag domain; IPR021109_Aspartic peptidase domain superfamily	4.99333	6.90667	7.1	4.08667	5.46	0	9.52	11.52	0	9.2	9.29	0	12.01	7.23	0	5.03
Am_Rn_000342	9480	XP_004501773.3_sulfite exporter TauE/SafE family protein 3 [Cicer arietinum]	AT2G25737.1_Sulfite exporter TauE/SafE family protein	IPR002781_Transmembrane protein TauE-like	7.46	11.84	12.5467	11.7067	1.13	12.25	9	12.45	8.43	14.64	5.83	17.13	14.68	16.06	9.94	9.12
Am_Rn_000343	9479	KHN21230.1_Retrovirus-related Pol polyprotein from transposon TNT 1-94, partial [Glycine soja]	AT3G54670.1_Structural maintenance of chromosomes (SMC) family protein, GeneName=TTN8	IPR013103_Reverse transcriptase, RNA-dependent DNA polymerase; IPR025724_GAG-pre-integrase domain; IPR012337_Ribonuclease H-like superfamily; IPR043502_DNA/RNA polymerase superfamily; IPR001584_Integrase, catalytic core	0.18	0.67	0.343333	0.446667	0.1	0.22	0.22	0.55	0.9	0.56	0.05	0.59	0.39	0.32	0.5	0.52
Am_Rn_000344	9478	PNX93789.1_copia-type polyprotein [Trifolium pratense]	AT4G23160.3_cysteine-rich RECEPTOR-like kinase, GeneName=CRK8	IPR001584_Integrase, catalytic core; IPR001878_Zinc finger, CCHC-type; IPR012337_Ribonuclease H-like superfamily; IPR013103_Reverse transcriptase, RNA-dependent DNA polymerase; IPR036875_Zinc finger, CCHC-type superfamily; IPR043502_DNA/RNA polymerase superfamily; IPR025724_GAG-pre-integrase domain	0.193333	1.88	1.33667	0.996667	0.32	0.18	0.08	1.22	1.65	2.77	0.18	1.34	2.49	0.38	1.36	1.25
Am_Rn_000345	9470	XP_013469402.1_pleiotropic drug resistance protein 2 [Medicago truncatula] KEH43440.1 drug resistance transporter-like ABC domain protein [Medicago truncatula] RHN81373.1 putative iron-chelate-transporting ATPase [Medicago truncatula]	AT2G36380.1_pleiotropic drug resistance 6, GeneName=ABCG34	IPR003439_ABC transporter-like, ATP-binding domain; IPR003593_AAA+ ATPase domain; IPR043926_ABC transporter family G domain; IPR013581_Plant PDR ABC transporter associated; IPR027417_P-loop containing nucleoside triphosphate hydrolase; IPR013525_ABC-2 type transporter	1.02333	14.9667	8.50333	6.00333	0	2.57	0.5	15.83	14.62	14.45	5.4	9.03	11.08	3.63	6.2	8.18
Am_Rn_000346	9468	XP_004488745.1_D-amino-acid transaminase, chloroplastic-like [Cicer arietinum]	AT5G57850.2_D-aminoacid aminotransferase-like PLP-dependent enzymes superfamily protein, GeneName=ADCL	IPR000477_Reverse transcriptase domain; IPR021109_Aspartic peptidase domain superfamily; IPR043502_DNA/RNA polymerase superfamily	1.05	2.18333	2.95667	2.16667	1.11	1.04	1	1.84	1.8	2.91	1.33	3.86	3.68	2.18	1.65	2.67
Am_Rn_000347	9466	BAT74885.1_hypothetical protein VIGAN_01265800, partial [Vigna angularis var. angularis] BAT99651.1 hypothetical protein VIGAN_10114400, partial [Vigna angularis var. angularis]	AT4G23160.3_cysteine-rich RECEPTOR-like kinase, GeneName=CRK8	IPR029472_Retrotransposon Copia-like, N-terminal; IPR005162_Retrotransposon gag domain	0	0.116667	0.436667	0.06	0	0	0	0.05	0.21	0.09	0.07	0.5	0.74	0.05	0.06	0.07
Am_Rn_000348	9462	XP_004488475.1_uncharacterized protein LOC101503892 [Cicer arietinum]	AT3G29760.3_Haloacid dehalogenase-like hydrolase (HAD) superfamily protein	.	0.96	2.36	1.14333	1.64	1.18	0.96	0.74	2.3	2.86	1.92	0.42	1.53	1.48	1.14	1.75	2.03
Am_Rn_000349	9452	XP_020237991.1_E3 ubiquitin-protein ligase UPL3 [Cajanus cajan]	AT4G38600.1_HECT ubiquitin protein ligase family protein KAK, GeneName=KAK	IPR016024_Armadillo-type fold; IPR035983_HECT, E3 ligase catalytic domain; IPR000569_HECT domain	1.26333	0.37	0.423333	0.533333	0	1.05	2.74	0.86	0	0.25	0	0.78	0.49	0.52	0.45	0.63
Am_Rn_000350	9445	XP_028197148.1_protease Do-like 7 isoform X4 [Glycine soja]	AT3G03380.1_DegP protease 7, GeneName=DEG7	IPR009003_Peptidase S1, PA clan; IPR001478_PDZ domain; IPR041489_PDZ domain 6; IPR036034_PDZ superfamily; IPR025926_PDZ-like domain	0.0466667	0.27	0.0966667	0.236667	0	0.14	0	0.13	0.53	0.15	0	0.1	0.19	0.34	0.18	0.19
Am_Rn_000351	9444	BAT74885.1_hypothetical protein VIGAN_01265800, partial [Vigna angularis var. angularis] BAT99651.1 hypothetical protein VIGAN_10114400, partial [Vigna angularis var. angularis]	AT4G23160.3_cysteine-rich RECEPTOR-like kinase, GeneName=CRK8	IPR029472_Retrotransposon Copia-like, N-terminal; IPR005162_Retrotransposon gag domain	3.85667	3.42	1.71333	3.48667	6	5.57	0	4.51	5.75	0	1.12	4	0.02	5.9	4.56	0
Am_Rn_000352	9443	PNY07963.1_ABC transporter B family member 19-like protein [Trifolium pratense]	AT1G28010.1_P-glycoprotein 14, GeneName=ABCB14	IPR027417_P-loop containing nucleoside triphosphate hydrolase; IPR003593_AAA+ ATPase domain; IPR003439_ABC transporter-like, ATP-binding domain; IPR036640_ABC transporter type 1, transmembrane domain superfamily; IPR011527_ABC transporter type 1, transmembrane domain	5.15333	2.03333	2.08667	2.98667	1.94	5.39	8.13	3.29	1.52	1.29	0.78	2.76	2.72	4.5	1.99	2.47
Am_Rn_000353	9432	XP_021279280.1_LOW QUALITY PROTEIN: uncharacterized protein LOC110412945 [Herrania umbratica]	AT4G31500.1_cytochrome P450, family 83, subfamily B, polypeptide 1, GeneName=CYP83B1	IPR019557_Aminotransferase-like, plant mobile domain	0	4.67667	0.00666667	0	0	0	0	7.67	4.05	2.31	0	0.02	0	0	0	0
Am_Rn_000354	9431	XP_027364997.1_uncharacterized protein LOC113872028 [Abrus precatorius]	AT1G66950.1_pleiotropic drug resistance 11, GeneName=ABCG39	IPR005380_XS domain	1.21	18.9967	8.80333	7.62667	0	2.2	1.43	28.4	14.25	14.34	5.5	8.92	11.99	9.19	7.21	6.48
Am_Rn_000355	9420	KAH1227560.1_Increased DNA methylation 1 [Glycine max]	AT2G37520.1_Acyl-CoA N-acyltransferase with RING/FYVE/PHD-type zinc finger domain-containing protein	IPR011011_Zinc finger, FYVE/PHD-type; IPR032308_Jas TPL-binding domain	0.173333	0.0933333	0.25	0.386667	0.04	0.27	0.21	0	0.22	0.06	0.14	0.46	0.15	0.34	0.66	0.16
Am_Rn_000356	9416	XP_025699596.1_serine/threonine-protein kinase TOR isoform X2 [Arachis hypogaea]	AT1G50030.1_target of rapamycin, GeneName=TOR	IPR024585_Domain of unknown function DUF3385, target of rapamycin protein; IPR016024_Armadillo-type fold	0.19	0.28	0.103333	0.103333	0.1	0	0.47	0.37	0.15	0.32	0	0	0.31	0	0.31	0
Am_Rn_000357	9412	MCH79878.1_TMV resistance protein N-like [Trifolium medium]	AT5G36930.3_Disease resistance protein (TIR-NBS-LRR class) family	IPR000157_Toll/interleukin-1 receptor homology (TIR) domain; IPR027417_P-loop containing nucleoside triphosphate hydrolase; IPR036390_Winged helix DNA-binding domain superfamily; IPR002182_NB-ARC; IPR035897_Toll/interleukin-1 receptor homology (TIR) domain superfamily	6.27667	10.94	6.29667	11.28	7.72	7.4	3.71	10.12	13.22	9.48	2.49	9.6	6.8	8.71	12.49	12.64
Am_Rn_000358	9408	GAU30895.1_hypothetical protein TSUD_381080 [Trifolium subterraneum]	AT1G03220.1_Eukaryotic aspartyl protease family protein	IPR032861_Xylanase inhibitor, N-terminal; IPR032799_Xylanase inhibitor, C-terminal; IPR021109_Aspartic peptidase domain superfamily	0	0.24	1.67667	0.313333	0	0	0	0	0.51	0.21	0.49	2.52	2.02	0.43	0.12	0.39
Am_Rn_000359	9403	XP_012568687.1_rab3 GTPase-activating protein catalytic subunit [Cicer arietinum] XP_012568688.1 rab3 GTPase-activating protein catalytic subunit [Cicer arietinum]	AT5G55060.1_Rab3 GTPase-activating protein catalytic subunit	IPR026147_Rab3GAP catalytic subunit, conserved domain	0	0	0	0.79	0	0	0	0	0	0	0	0	0	1.17	0.72	0.48
Am_Rn_000360	9391	XP_012575158.1_glutamate receptor 2.9-like isoform X1 [Cicer arietinum]	AT1G51540.1_Galactose oxidase/kelch repeat superfamily protein	IPR001320_Ionotropic glutamate receptor; IPR028082_Periplasmic binding protein-like I; IPR001828_Receptor, ligand binding region; IPR001638_Solute-binding protein family 3/N-terminal domain of MltF	0.1	0	0.00666667	0	0.11	0.03	0.16	0	0	0	0.02	0	0	0	0	0
Am_Rn_000361	9391	KHN21230.1_Retrovirus-related Pol polyprotein from transposon TNT 1-94, partial [Glycine soja]	AT5G48120.1_ARM repeat superfamily protein, GeneName=MET18	IPR001584_Integrase, catalytic core; IPR012337_Ribonuclease H-like superfamily; IPR025724_GAG-pre-integrase domain; IPR043502_DNA/RNA polymerase superfamily; IPR013103_Reverse transcriptase, RNA-dependent DNA polymerase	0	0.116667	0.0466667	0.176667	0	0	0	0.08	0.13	0.14	0	0	0.14	0.2	0.08	0.25
Am_Rn_000362	9386	KYP41234.1_Retrovirus-related Pol polyprotein from transposon TNT 1-94 [Cajanus cajan]	AT4G23160.3_cysteine-rich RECEPTOR-like kinase, GeneName=CRK8	IPR001584_Integrase, catalytic core; IPR025724_GAG-pre-integrase domain; IPR012337_Ribonuclease H-like superfamily	0.0766667	0.183333	0.13	0.186667	0.19	0	0.04	0.25	0	0.3	0.18	0	0.21	0.41	0.06	0.09
Am_Rn_000363	9377	RDX97424.1_hypothetical protein CR513_19805, partial [Mucuna pruriens]	.	.	3.55667	6.17667	5.80333	7.56667	3.15	5.26	2.26	6.46	6.46	5.61	3.74	7.6	6.07	6.15	7.76	8.79
Am_Rn_000364	9371	XP_027351357.1_uncharacterized protein LOC113862472 [Abrus precatorius]	AT4G27220.1_NB-ARC domain-containing disease resistance protein	IPR003593_AAA+ ATPase domain; IPR002182_NB-ARC; IPR027417_P-loop containing nucleoside triphosphate hydrolase	5.02333	6.09	3.69333	5.04667	8.62	3.31	3.14	6.16	7.32	4.79	2.86	4.43	3.79	3.85	6.97	4.32
Am_Rn_000365	9368	XP_045798047.1_uncharacterized protein LOC123892292 [Trifolium pratense]	AT4G23160.3_cysteine-rich RECEPTOR-like kinase, GeneName=CRK8	IPR000477_Reverse transcriptase domain; IPR012337_Ribonuclease H-like superfamily; IPR026960_Reverse transcriptase zinc-binding domain; IPR043502_DNA/RNA polymerase superfamily	0.226667	0.376667	0.413333	0.713333	0.21	0.18	0.29	0.29	0.32	0.52	0.25	0.53	0.46	0.71	0.86	0.57
Am_Rn_000366	9361	XP_025699596.1_serine/threonine-protein kinase TOR isoform X2 [Arachis hypogaea]	AT1G50030.1_target of rapamycin, GeneName=TOR	IPR024585_Domain of unknown function DUF3385, target of rapamycin protein; IPR016024_Armadillo-type fold	0.0733333	0	0.08	0.286667	0	0.22	0	0	0	0	0	0.24	0	0.35	0	0.51
Am_Rn_000367	9359	XP_020237991.1_E3 ubiquitin-protein ligase UPL3 [Cajanus cajan]	AT4G38600.1_HECT ubiquitin protein ligase family protein KAK, GeneName=KAK	IPR016024_Armadillo-type fold; IPR000569_HECT domain; IPR035983_HECT, E3 ligase catalytic domain	0.0766667	0	0	0	0.23	0	0	0	0	0	0	0	0	0	0	0
Am_Rn_000368	9355	XP_027330727.1_E3 ubiquitin-protein ligase UPL2-like [Abrus precatorius] XP_027330728.1 E3 ubiquitin-protein ligase UPL2-like [Abrus precatorius] XP_027330729.1 E3 ubiquitin-protein ligase UPL2-like [Abrus precatorius]	AT1G55860.1_LOW protein: E3 ubiquitin ligase-like protein, GeneName=UPL1	IPR035983_HECT, E3 ligase catalytic domain; IPR025527_HUWE1/Rev1, ubiquitin binding region; IPR000569_HECT domain	0.07	0.543333	0.926667	0.26	0.21	0	0	0.77	0.86	0	2.09	0.69	0	0.78	0	0
Am_Rn_000369	9353	XP_045811015.1_laccase-14-like [Trifolium pratense]	AT5G09360.1_laccase 14, GeneName=LAC14	IPR001117_Multicopper oxidase, type 1; IPR011706_Multicopper oxidase, C-terminal; IPR008972_Cupredoxin	0.853333	1.10667	0.656667	0.83	1.3	0.09	1.17	1.5	0.61	1.21	0.46	0.52	0.99	1.11	0.72	0.66
Am_Rn_000370	9347	PNX92911.1_Ty3/gypsy retrotransposon protein [Trifolium pratense]	AT5G28050.1_Cytidine/deoxycytidylate deaminase family protein	IPR041588_Integrase zinc-binding domain; IPR016197_Chromo-like domain superfamily; IPR043502_DNA/RNA polymerase superfamily; IPR012337_Ribonuclease H-like superfamily; IPR041577_Reverse transcriptase/retrotransposon-derived protein, RNase H-like domain; IPR000477_Reverse transcriptase domain; IPR021109_Aspartic peptidase domain superfamily	2.19	2.31333	2.18333	2.64	1.18	1.59	3.8	1.33	1.98	3.63	1.63	2.31	2.61	1.86	2.24	3.82
Am_Rn_000371	9338	XP_027342738.1_LEAF RUST 10 DISEASE-RESISTANCE LOCUS RECEPTOR-LIKE PROTEIN KINASE-like 2.1 isoform X1 [Abrus precatorius]	AT5G38260.1_Protein kinase superfamily protein	IPR032872_Wall-associated receptor kinase, C-terminal; IPR011009_Protein kinase-like domain superfamily; IPR025287_Wall-associated receptor kinase, galacturonan-binding domain; IPR000719_Protein kinase domain	0.00333333	1.11	0.0633333	0.756667	0.01	0	0	2.34	0.75	0.24	0.19	0	0	1.53	0.55	0.19
Am_Rn_000372	9326	XP_045798047.1_uncharacterized protein LOC123892292 [Trifolium pratense]	AT4G23160.3_cysteine-rich RECEPTOR-like kinase, GeneName=CRK8	IPR043502_DNA/RNA polymerase superfamily; IPR000477_Reverse transcriptase domain	0.563333	0.223333	0.213333	0.32	0.85	0.42	0.42	0.22	0.23	0.22	0.03	0.33	0.28	0.12	0.39	0.45
Am_Rn_000373	9319	RDX64251.1_Nuclear pore complex protein NUP1, partial [Mucuna pruriens]	AT3G10650.1_nuclear pore complex protein, GeneName=NUP1	.	6.13667	7.89667	4.65	12.7933	13.01	2.15	3.25	8.89	5.06	9.74	6.79	5.68	1.48	11	14.9	12.48
Am_Rn_000374	9317	GAU51986.1_hypothetical protein TSUD_417870, partial [Trifolium subterraneum]	.	IPR000477_Reverse transcriptase domain; IPR043502_DNA/RNA polymerase superfamily	6.55	1.24	1.73	1.79	16.78	1.91	0.96	0.41	2.25	1.06	0.91	2.53	1.75	0.98	1.62	2.77
Am_Rn_000375	9315	XP_004504570.1_uncharacterized protein LOC101509424 [Cicer arietinum]	AT1G23170.1_transmembrane protein (Protein of unknown function DUF2359, transmembrane)	IPR012337_Ribonuclease H-like superfamily; IPR001584_Integrase, catalytic core	1.12	1.2	0.57	0.7	1.04	1.36	0.96	0.93	1.95	0.72	0	1.03	0.68	0.62	1.05	0.43
Am_Rn_000376	9313	GAU47870.1_hypothetical protein TSUD_404410 [Trifolium subterraneum]	ATMG00860.1_DNA/RNA polymerases superfamily protein, GeneName=ORF158	IPR041588_Integrase zinc-binding domain	4.95667	6.12667	4.52667	5.15667	4.51	10.34	0.02	7.49	10.89	0	2.18	11.39	0.01	5.04	10.41	0.02
Am_Rn_000377	9306	RZB71032.1_LINE-1 retrotransposable element ORF2 protein [Glycine soja]	AT2G25737.1_Sulfite exporter TauE/SafE family protein	.	8.21333	14.2333	13.78	12.91	2.12	12.73	9.79	13.9	12.04	16.76	5.38	17.01	18.95	15.62	11.78	11.33
Am_Rn_000378	9306	RHN65171.1_putative RNA helicase [Medicago truncatula]	AT1G58060.1_RNA helicase family protein	IPR011709_Domain of unknown function DUF1605	0.05	0	0	0	0	0	0.15	0	0	0	0	0	0	0	0	0
Am_Rn_000379	9304	XP_012570058.1_vacuolar protein-sorting-associated protein 33 homolog [Cicer arietinum]	AT3G54860.1_Sec1/munc18-like (SM) proteins superfamily, GeneName=ATVPS33	IPR003613_U-box domain; IPR000225_Armadillo; IPR016024_Armadillo-type fold	0.393333	0.76	0.743333	1.24333	0.37	0.48	0.33	0.76	0.8	0.72	0.51	0.62	1.1	1.52	1.16	1.05
Am_Rn_000380	9299	PNY17825.1_hypothetical protein L195_g014577 [Trifolium pratense]	AT5G10060.1_ENTH/VHS family protein	.	0.153333	0.12	0.21	0.143333	0.17	0.15	0.14	0.07	0.13	0.16	0.29	0.22	0.12	0.28	0.08	0.07
Am_Rn_000381	9294	KAH1067939.1_hypothetical protein GYH30_005792 [Glycine max]	ATMG00860.1_DNA/RNA polymerases superfamily protein, GeneName=ORF158	IPR041577_Reverse transcriptase/retrotransposon-derived protein, RNase H-like domain; IPR043502_DNA/RNA polymerase superfamily; IPR000477_Reverse transcriptase domain	0.42	0.96	0.99	1.24333	0.42	0.33	0.51	1.32	0.63	0.93	1.11	0.96	0.9	1.34	1.28	1.11
Am_Rn_000382	9293	PNY14726.1_putative UDP-N-acetylglucosamine-peptide N-acetylglucosaminyltransferase SEC-like protein [Trifolium pratense]	AT3G04240.2_Tetratricopeptide repeat (TPR)-like superfamily protein, GeneName=SEC	IPR019734_Tetratricopeptide repeat; IPR011990_Tetratricopeptide-like helical domain superfamily; IPR006597_Sel1-like repeat; IPR029489_O-GlcNAc transferase, C-terminal; IPR001440_Tetratricopeptide repeat 1	0.17	0.113333	0.153333	0.0933333	0	0	0.51	0	0	0.34	0.46	0	0	0.22	0	0.06
Am_Rn_000383	9292	XP_012575436.1_zinc finger BED domain-containing protein RICESLEEPER 2-like [Cicer arietinum]	AT3G42170.2_BED zinc finger and hAT dimerization domain-containing protein DAYSLEEPER, GeneName=DAYSLEEPER	IPR012337_Ribonuclease H-like superfamily; IPR003656_Zinc finger, BED-type; IPR036236_Zinc finger C2H2 superfamily	2.35667	2.29	2.62	2.76333	2.93	2.69	1.45	1.46	3.29	2.12	0.86	3.78	3.22	1.86	3.35	3.08
Am_Rn_000384	9289	XP_012570682.1_GRIP and coiled-coil domain-containing protein 2 [Cicer arietinum]	AT4G31570.2_nucleoporin	.	36.8767	14.81	13.2367	20.17	46.34	33.89	30.4	14.31	14.79	15.33	8.91	16.28	14.52	19.77	19.35	21.39
Am_Rn_000385	9283	XP_013464841.1_uncharacterized protein LOC25487444 [Medicago truncatula] XP_024632358.1 uncharacterized protein LOC25487444 [Medicago truncatula] KEH38876.1 DUF2146 family protein [Medicago truncatula] RHN75359.1 hypothetical protein MtrunA17_Chr2g0320301 [Medicago truncatula]	AT2G17420.2_NADPH-dependent thioredoxin reductase A, GeneName=NTRA	IPR019354_Smg8/Smg9	0.0566667	0.05	0.123333	0.136667	0.04	0.08	0.05	0.15	0	0	0.03	0.13	0.21	0.16	0	0.25
Am_Rn_000386	9282	KYP57626.1_Retrovirus-related Pol polyprotein from transposon TNT 1-94 [Cajanus cajan]	AT3G45240.1_geminivirus rep interacting kinase 1, GeneName=GRIK1	IPR012337_Ribonuclease H-like superfamily	1.97333	3.85	1.78333	2.3	2.43	1.53	1.96	2.63	4.61	4.31	1.9	1.59	1.86	1.24	2.7	2.96
Am_Rn_000387	9273	PNY14726.1_putative UDP-N-acetylglucosamine-peptide N-acetylglucosaminyltransferase SEC-like protein [Trifolium pratense]	AT3G04240.2_Tetratricopeptide repeat (TPR)-like superfamily protein, GeneName=SEC	IPR019734_Tetratricopeptide repeat; IPR006597_Sel1-like repeat; IPR011990_Tetratricopeptide-like helical domain superfamily; IPR001440_Tetratricopeptide repeat 1; IPR029489_O-GlcNAc transferase, C-terminal	0.07	0.05	0.11	0.13	0	0.1	0.11	0	0	0.15	0	0	0.33	0	0	0.39
Am_Rn_000388	9272	MCH80451.1_retrotransposon protein [Trifolium medium]	AT1G78995.1_hypothetical protein	IPR043502_DNA/RNA polymerase superfamily; IPR001878_Zinc finger, CCHC-type; IPR021109_Aspartic peptidase domain superfamily; IPR036875_Zinc finger, CCHC-type superfamily; IPR005162_Retrotransposon gag domain; IPR000477_Reverse transcriptase domain	0.126667	0.736667	0.29	0.436667	0.17	0.13	0.08	0.96	0.71	0.54	0.11	0.44	0.32	0.21	0.44	0.66
Am_Rn_000389	9271	XP_012568314.1_ABC transporter C family member 2-like [Cicer arietinum] XP_012568316.1 ABC transporter C family member 2-like [Cicer arietinum] XP_012568318.1 ABC transporter C family member 2-like [Cicer arietinum] XP_012568323.1 ABC transporter C family member 2-like [Cicer arietinum]	AT2G34660.2_multidrug resistance-associated protein 2, GeneName=ABCC2	IPR036640_ABC transporter type 1, transmembrane domain superfamily; IPR027417_P-loop containing nucleoside triphosphate hydrolase; IPR003439_ABC transporter-like, ATP-binding domain; IPR011527_ABC transporter type 1, transmembrane domain; IPR003593_AAA+ ATPase domain	1.73667	1.03	0.716667	0.583333	2.87	1.16	1.18	1.02	1.03	1.04	1.54	0.54	0.07	0.39	0.64	0.72
Am_Rn_000390	9263	XP_045795997.1_protein ROS1A [Trifolium pratense]	AT2G36490.1_demeter-like 1, GeneName=DML1	IPR011257_DNA glycosylase; IPR003651_Endonuclease III-like, iron-sulphur cluster loop motif; IPR003265_HhH-GPD domain	0.533333	1.26	2.65667	1.69667	1.05	0.44	0.11	0.45	2.45	0.88	1.12	4.17	2.68	1.61	1.69	1.79
Am_Rn_000391	9260	KYP38429.1_Retrotransposable element Tf2, partial [Cajanus cajan]	AT3G48780.1_serine palmitoyltransferase 1, GeneName=SPT1	IPR005162_Retrotransposon gag domain	2.05667	2.21333	1.04	1.84333	1.32	1.67	3.18	1.57	2.51	2.56	0.39	1.27	1.46	1.41	2.14	1.98
Am_Rn_000392	9253	XP_020237991.1_E3 ubiquitin-protein ligase UPL3 [Cajanus cajan]	AT4G38600.1_HECT ubiquitin protein ligase family protein KAK, GeneName=KAK	IPR035983_HECT, E3 ligase catalytic domain; IPR000569_HECT domain; IPR016024_Armadillo-type fold	3.12667	0.0933333	0.286667	0.0966667	2.59	1.36	5.43	0	0	0.28	0	0.25	0.61	0	0.29	0
Am_Rn_000393	9253	XP_025886975.1_K(+) efflux antiporter 6 isoform X6 [Solanum lycopersicum]	AT5G11800.1_K+ efflux antiporter 6, GeneName=KEA6	IPR006153_Cation/H+ exchanger	0.1	0.116667	0.206667	0.306667	0	0.14	0.16	0.17	0.18	0	0.2	0.31	0.11	0.45	0.16	0.31
Am_Rn_000394	9251	GAU34751.1_hypothetical protein TSUD_17230 [Trifolium subterraneum]	AT1G79190.1_ARM repeat superfamily protein	IPR016024_Armadillo-type fold	0.586667	1.55333	0.87	0.993333	0.51	0.68	0.57	1.78	1.32	1.56	0.29	1.24	1.08	0.96	1.08	0.94
Am_Rn_000395	9247	XP_004512257.1_ubiquitin domain-containing protein DSK2a-like isoform X1 [Cicer arietinum]	AT2G17200.1_ubiquitin family protein, GeneName=DSK2	IPR015940_Ubiquitin-associated domain; IPR000626_Ubiquitin-like domain; IPR009060_UBA-like superfamily; IPR019956_Ubiquitin domain; IPR029071_Ubiquitin-like domain superfamily; IPR006636_Heat shock chaperonin-binding	0.176667	1.43333	0.883333	0.726667	0.1	0.26	0.17	1.36	1.41	1.53	0.14	1.16	1.35	0.45	0.86	0.87
Am_Rn_000396	9246	BAG72151.1_hypothetical protein [Lotus japonicus]	AT5G16280.2_Tetratricopeptide repeat (TPR)-like superfamily protein	IPR005162_Retrotransposon gag domain; IPR000477_Reverse transcriptase domain; IPR043502_DNA/RNA polymerase superfamily; IPR021109_Aspartic peptidase domain superfamily	0.243333	0.26	0.333333	0.193333	0.23	0.25	0.25	0.23	0.42	0.13	0.15	0.46	0.39	0.19	0.2	0.19
Am_Rn_000397	9245	XP_004500268.1_protein SMAX1-LIKE 6 isoform X1 [Cicer arietinum]	AT5G02310.1_proteolysis 6, GeneName=PRT6	IPR044046_E3 ubiquitin-protein ligase UBR-like, C-terminal; IPR036628_Clp, N-terminal domain superfamily; IPR027417_P-loop containing nucleoside triphosphate hydrolase	0	0	0	0.116667	0	0	0	0	0	0	0	0	0	0	0	0.35
Am_Rn_000398	9245	KOM49767.1_hypothetical protein LR48_Vigan08g059400 [Vigna angularis]	ATMG00860.1_DNA/RNA polymerases superfamily protein, GeneName=ORF158	IPR041588_Integrase zinc-binding domain; IPR016197_Chromo-like domain superfamily; IPR005162_Retrotransposon gag domain; IPR012337_Ribonuclease H-like superfamily; IPR021109_Aspartic peptidase domain superfamily; IPR041577_Reverse transcriptase/retrotransposon-derived protein, RNase H-like domain; IPR023780_Chromo domain; IPR000477_Reverse transcriptase domain; IPR043502_DNA/RNA polymerase superf…	0.713333	3.03667	2.24	4.05333	0	2.14	0	4.43	1.08	3.6	0.6	3.28	2.84	2.97	5.03	4.16
Am_Rn_000399	9243	GAU41409.1_hypothetical protein TSUD_244940 [Trifolium subterraneum]	AT4G23180.1_cysteine-rich RLK (RECEPTOR-like protein kinase) 10, GeneName=CRK10	IPR011009_Protein kinase-like domain superfamily; IPR000719_Protein kinase domain; IPR001245_Serine-threonine/tyrosine-protein kinase, catalytic domain	0.653333	0.703333	0.236667	0.453333	0.52	0.68	0.76	0.47	0.93	0.71	0.29	0.1	0.32	0.09	0.54	0.73
Am_Rn_000400	9237	KEH17304.1_cytochrome O ubiquinol oxidase subunit I [Medicago truncatula]	ATMG01360.1_cytochrome oxidase, GeneName=COX1	.	1.64667	2.89	3.96333	5.33333	0.87	2.37	1.7	3.11	2.59	2.97	2.99	4.29	4.61	6.4	5.99	3.61
Am_Rn_000401	9233	KHN21230.1_Retrovirus-related Pol polyprotein from transposon TNT 1-94, partial [Glycine soja]	AT4G23160.3_cysteine-rich RECEPTOR-like kinase, GeneName=CRK8	IPR001584_Integrase, catalytic core; IPR012337_Ribonuclease H-like superfamily; IPR025724_GAG-pre-integrase domain; IPR043502_DNA/RNA polymerase superfamily; IPR013103_Reverse transcriptase, RNA-dependent DNA polymerase	0.443333	0.633333	1.11667	0.556667	0.23	1.04	0.06	0.76	0.55	0.59	0.68	1.41	1.26	0.59	0.48	0.6
Am_Rn_000402	9233	XP_045787806.1_uncharacterized protein LOC123883130 isoform X2 [Trifolium pratense]	AT2G46560.1_transducin family protein / WD-40 repeat family protein	IPR022033_RAVE complex protein Rav1 C-terminal; IPR036322_WD40-repeat-containing domain superfamily; IPR001680_WD40 repeat	0.2	0.53	0.576667	0.443333	0	0.29	0.31	0	0.57	1.02	0.08	0.7	0.95	0.44	0.45	0.44
Am_Rn_000403	9232	XP_027354888.1_B3 domain-containing protein Os07g0563300-like [Abrus precatorius]	AT1G79270.3_evolutionarily conserved C-terminal region 8, GeneName=ECT8	IPR007275_YTH domain	0.773333	0.65	0.493333	0.273333	0.84	1.25	0.23	0.42	0.64	0.89	0.94	0.15	0.39	0.7	0	0.12
Am_Rn_000404	9227	GAU51986.1_hypothetical protein TSUD_417870, partial [Trifolium subterraneum]	.	IPR000477_Reverse transcriptase domain; IPR043502_DNA/RNA polymerase superfamily	4.28667	1.58667	1.38	3.78333	9.7	2.17	0.99	1.67	0.9	2.19	0.52	0.75	2.87	2.74	3.49	5.12
Am_Rn_000405	9221	XP_027330727.1_E3 ubiquitin-protein ligase UPL2-like [Abrus precatorius] XP_027330728.1 E3 ubiquitin-protein ligase UPL2-like [Abrus precatorius] XP_027330729.1 E3 ubiquitin-protein ligase UPL2-like [Abrus precatorius]	AT1G55860.1_LOW protein: E3 ubiquitin ligase-like protein, GeneName=UPL1	IPR035983_HECT, E3 ligase catalytic domain; IPR025527_HUWE1/Rev1, ubiquitin binding region; IPR000569_HECT domain	0.916667	1.96667	1.91667	4.47667	1.98	0.77	0	3.93	1.97	0	3.36	2.14	0.25	8.42	5.01	0
Am_Rn_000406	9221	XP_004496318.1_uncharacterized protein LOC101504689 isoform X1 [Cicer arietinum]	AT3G52250.1_Duplicated homeodomain-like superfamily protein	IPR017930_Myb domain; IPR009057_Homeobox-like domain superfamily; IPR001005_SANT/Myb domain	0.153333	4.29667	3.33667	6.01667	0.23	0.23	0	6.22	2.54	4.13	3.39	4.15	2.47	5.98	5.71	6.36
Am_Rn_000407	9217	RDX63395.1_hypothetical protein CR513_58180, partial [Mucuna pruriens]	AT5G13950.4_nuclear factor kappa-B-binding protein	.	1.52667	3.21	1.27333	1.08333	2.66	0.93	0.99	3.61	3.16	2.86	1.29	1.25	1.28	1.19	1.12	0.94
Am_Rn_000408	9216	XP_027329281.1_beta-galactosidase-like [Abrus precatorius]	AT3G13750.1_beta galactosidase 1, GeneName=BGAL1	IPR008979_Galactose-binding-like domain superfamily; IPR041392_Beta-galactosidase, beta-sandwich domain; IPR001944_Glycoside hydrolase, family 35; IPR017853_Glycoside hydrolase superfamily; IPR000922_D-galactoside/L-rhamnose binding SUEL lectin domain; IPR031330_Glycoside hydrolase 35, catalytic domain	0.636667	0.166667	0.09	0.106667	0.9	0.7	0.31	0.11	0.2	0.19	0.11	0	0.16	0.25	0.07	0
Am_Rn_000409	9214	XP_004496318.1_uncharacterized protein LOC101504689 isoform X1 [Cicer arietinum]	AT3G52250.1_Duplicated homeodomain-like superfamily protein	IPR017930_Myb domain; IPR009057_Homeobox-like domain superfamily; IPR001005_SANT/Myb domain	1.10333	11.0933	9.62	9.01667	0.68	1.6	1.03	10.3	10.72	12.26	6.65	10.42	11.79	7.2	11.51	8.34
Am_Rn_000410	9213	KOM49767.1_hypothetical protein LR48_Vigan08g059400 [Vigna angularis]	ATMG00860.1_DNA/RNA polymerases superfamily protein, GeneName=ORF158	IPR041588_Integrase zinc-binding domain; IPR016197_Chromo-like domain superfamily; IPR005162_Retrotransposon gag domain; IPR012337_Ribonuclease H-like superfamily; IPR021109_Aspartic peptidase domain superfamily; IPR041577_Reverse transcriptase/retrotransposon-derived protein, RNase H-like domain; IPR023780_Chromo domain; IPR000477_Reverse transcriptase domain; IPR043502_DNA/RNA polymerase superf…	0.57	1.43333	0	0	0.9	0	0.81	0	4.3	0	0	0	0	0	0	0
Am_Rn_000411	9209	KYP38573.1_Retrovirus-related Pol polyprotein from transposon TNT 1-94, partial [Cajanus cajan]	AT4G23160.3_cysteine-rich RECEPTOR-like kinase, GeneName=CRK8	IPR043502_DNA/RNA polymerase superfamily; IPR025724_GAG-pre-integrase domain; IPR013103_Reverse transcriptase, RNA-dependent DNA polymerase; IPR012337_Ribonuclease H-like superfamily; IPR036875_Zinc finger, CCHC-type superfamily; IPR001584_Integrase, catalytic core	1.34	0.19	0.11	0.133333	0.33	0.26	3.43	0.09	0.33	0.15	0	0.23	0.1	0.11	0.26	0.03
Am_Rn_000412	9209	XP_024017123.1_K(+) efflux antiporter 4 isoform X3 [Morus notabilis]	AT2G19600.1_K+ efflux antiporter 4, GeneName=KEA4	IPR006153_Cation/H+ exchanger	0.0833333	0.1	0.16	0.173333	0.08	0	0.17	0	0.2	0.1	0.32	0.16	0	0	0.18	0.34
Am_Rn_000413	9208	XP_004493650.1_isoamylase 2, chloroplastic [Cicer arietinum]	AT1G03310.1_debranching enzyme 1, GeneName=DBE1	IPR014756_Immunoglobulin E-set; IPR004193_Glycoside hydrolase, family 13, N-terminal; IPR006047_Glycosyl hydrolase, family 13, catalytic domain; IPR017853_Glycoside hydrolase superfamily	1.13	2.97333	4.46667	4.17333	1.19	1.7	0.5	1.57	3.07	4.28	1.77	4.85	6.78	2.17	3.7	6.65
Am_Rn_000414	9206	XP_012570366.1_protein ROS1-like [Cicer arietinum]	AT2G36490.1_demeter-like 1, GeneName=DML1	IPR011257_DNA glycosylase; IPR003265_HhH-GPD domain; IPR003651_Endonuclease III-like, iron-sulphur cluster loop motif	0.466667	0.326667	0.82	0.49	0.67	0.4	0.33	0.21	0.52	0.25	0.74	1.25	0.47	0.6	0.49	0.38
Am_Rn_000415	9202	GAU37589.1_hypothetical protein TSUD_365100 [Trifolium subterraneum]	AT5G19150.2_pfkB-like carbohydrate kinase family protein	IPR000477_Reverse transcriptase domain; IPR043502_DNA/RNA polymerase superfamily	0.00333333	0.27	0.08	0.106667	0	0	0.01	0.49	0.27	0.05	0	0.05	0.19	0.26	0.06	0
Am_Rn_000416	9193	XP_004493267.1_UPF0400 protein C337.03-like [Cicer arietinum] XP_012569242.1 UPF0400 protein C337.03-like [Cicer arietinum]	AT5G10060.1_ENTH/VHS family protein	IPR006569_CID domain; IPR008942_ENTH/VHS	1.28667	1.01333	0.833333	0.773333	1.69	1.14	1.03	1	1.11	0.93	0.21	1.34	0.95	0.61	0.99	0.72
Am_Rn_000417	9192	XP_012571796.1_protein WHAT&apos;S THIS FACTOR 1, chloroplastic [Cicer arietinum] XP_012571797.1 protein WHAT&apos;S THIS FACTOR 1, chloroplastic [Cicer arietinum] XP_012571798.1 protein WHAT&apos;S THIS FACTOR 1, chloroplastic [Cicer arietinum] XP_012571799.1 protein WHAT&apos;S THIS FACTOR 1, chloroplastic [Cicer arietinum] XP_027190829.1 protein WHAT&apos;S THIS FACTOR 1, chloroplastic [Cicer …	AT5G62990.1_Ubiquitin carboxyl-terminal hydrolase family protein, GeneName=emb1692	IPR043502_DNA/RNA polymerase superfamily; IPR013103_Reverse transcriptase, RNA-dependent DNA polymerase	0.0133333	0.296667	0.23	0.41	0	0.04	0	0.29	0.43	0.17	0.02	0.25	0.42	0.29	0.41	0.53
Am_Rn_000418	9190	RZB98077.1_Mediator of RNA polymerase II transcription subunit 7b isoform B [Glycine soja]	AT5G03220.1_Mediator complex, subunit Med7	IPR037212_Mediator complex, subunit Med7/Med21-like; IPR009244_Mediator complex, subunit Med7	0.34	1.40333	1.13	0.323333	0.4	0.12	0.5	1.49	1.26	1.46	0.53	1.31	1.55	0.34	0.42	0.21
Am_Rn_000419	9180	PNY14726.1_putative UDP-N-acetylglucosamine-peptide N-acetylglucosaminyltransferase SEC-like protein [Trifolium pratense]	AT3G04240.2_Tetratricopeptide repeat (TPR)-like superfamily protein, GeneName=SEC	IPR019734_Tetratricopeptide repeat; IPR006597_Sel1-like repeat; IPR011990_Tetratricopeptide-like helical domain superfamily; IPR001440_Tetratricopeptide repeat 1; IPR029489_O-GlcNAc transferase, C-terminal	0.326667	1.29	1.22667	1.04667	0.21	0.39	0.38	0.95	1.97	0.95	0.1	2.62	0.96	1.02	1.98	0.14
Am_Rn_000420	9173	XP_045826463.1_uncharacterized protein LOC123918448 isoform X1 [Trifolium pratense] XP_045826464.1 uncharacterized protein LOC123918448 isoform X2 [Trifolium pratense]	AT1G61300.2_LRR and NB-ARC domains-containing disease resistance protein	IPR002182_NB-ARC; IPR027417_P-loop containing nucleoside triphosphate hydrolase	1.66667	5.61	4.52	7.55	1.58	2.37	1.05	4.72	9.11	3	2.79	7.31	3.46	5.29	12.54	4.82
Am_Rn_000421	9170	RZB52867.1_putative ribonuclease H protein, partial [Glycine soja]	AT4G25600.4_Oxoglutarate/iron-dependent oxygenase	IPR036691_Endonuclease/exonuclease/phosphatase superfamily	0.3	2.38667	0.593333	0.953333	0.29	0.36	0.25	2.37	2.21	2.58	0.17	0.83	0.78	0.98	0.88	1
Am_Rn_000422	9163	RHN61905.1_putative nucleotidyltransferase, Ribonuclease H [Medicago truncatula]	ATMG00860.1_DNA/RNA polymerases superfamily protein, GeneName=ORF158	IPR001810_F-box domain; IPR006527_F-box associated domain, type 1; IPR036047_F-box-like domain superfamily; IPR017451_F-box associated interaction domain	3.45333	11.4567	5.55333	5.05	5.02	2.4	2.94	13.32	10.66	10.39	2.05	7.74	6.87	3.59	6.15	5.41
Am_Rn_000423	9158	PNX81362.1_hypothetical protein L195_g037380, partial [Trifolium pratense]	AT1G67170.1_sarcolemmal membrane-associated protein	.	0.423333	0.753333	0.78	0.743333	0.53	0.52	0.22	0.47	1.14	0.65	0.31	1.18	0.85	0.5	0.81	0.92
Am_Rn_000424	9156	XP_045810998.1_nuclear exosome regulator NRDE2 isoform X4 [Trifolium pratense]	AT3G17740.1_hypothetical protein	IPR013633_siRNA-mediated silencing protein NRDE-2	0.0666667	3.74	1.09	6.54	0	0.2	0	1.59	5.02	4.61	0.56	1.77	0.94	7.02	7.19	5.41
Am_Rn_000425	9155	XP_027330727.1_E3 ubiquitin-protein ligase UPL2-like [Abrus precatorius] XP_027330728.1 E3 ubiquitin-protein ligase UPL2-like [Abrus precatorius] XP_027330729.1 E3 ubiquitin-protein ligase UPL2-like [Abrus precatorius]	AT1G55860.1_LOW protein: E3 ubiquitin ligase-like protein, GeneName=UPL1	IPR035983_HECT, E3 ligase catalytic domain; IPR025527_HUWE1/Rev1, ubiquitin binding region; IPR000569_HECT domain	0	0.873333	2.45	4.10667	0	0	0	2.47	0.15	0	5.51	1.84	0	11.41	0.91	0
Am_Rn_000426	9155	XP_003550500.1_phospholipase A I isoform X1 [Glycine max] XP_028210417.1 phospholipase A I-like [Glycine soja] KAG4929232.1 hypothetical protein JHK86_046193 [Glycine max] KAH1116226.1 hypothetical protein GYH30_045920 [Glycine max] KRH02092.1 hypothetical protein GLYMA_17G015200v4 [Glycine max] RZB54690.1 Phospholipase A I isoform A [Glycine soja]	AT1G61850.2_phospholipase A I-like protein	IPR016035_Acyl transferase/acyl hydrolase/lysophospholipase	0	0	0.0566667	0.106667	0	0	0	0	0	0	0	0	0.17	0	0	0.32
Am_Rn_000427	9150	KHN21230.1_Retrovirus-related Pol polyprotein from transposon TNT 1-94, partial [Glycine soja]	AT4G23160.3_cysteine-rich RECEPTOR-like kinase, GeneName=CRK8	IPR001584_Integrase, catalytic core; IPR012337_Ribonuclease H-like superfamily; IPR013103_Reverse transcriptase, RNA-dependent DNA polymerase; IPR025724_GAG-pre-integrase domain; IPR043502_DNA/RNA polymerase superfamily	0.52	1.30667	0.753333	0.74	0.57	0.45	0.54	0.79	1.35	1.78	0	1.16	1.1	0.2	0.71	1.31
Am_Rn_000428	9146	XP_027337807.1_CCR4-NOT transcription complex subunit 1 [Abrus precatorius]	AT1G02080.2_transcription regulator	IPR032193_CCR4-NOT transcription complex subunit 1, TTP binding domain; IPR032191_CCR4-NOT transcription complex subunit 1, CAF1-binding domain; IPR032194_CCR4-NOT transcription complex subunit 1, HEAT repeat; IPR024557_CCR4-NOT transcription complex subunit 1, domain 4	0.0966667	0.143333	0.133333	0.306667	0.12	0.12	0.05	0.14	0.16	0.13	0.07	0.07	0.26	0.31	0.15	0.46
Am_Rn_000429	9145	KAG5093040.1_hypothetical protein JHK82_051818 [Glycine max] KAG5096104.1 hypothetical protein JHK84_051692 [Glycine max]	AT4G10780.2_LRR and NB-ARC domains-containing disease resistance protein	IPR001611_Leucine-rich repeat; IPR003656_Zinc finger, BED-type; IPR002182_NB-ARC; IPR027417_P-loop containing nucleoside triphosphate hydrolase	0.0633333	0.853333	0.45	0.216667	0	0.08	0.11	0.55	1.64	0.37	0.24	0.57	0.54	0.21	0.3	0.14
Am_Rn_000430	9144	PNY15776.1_ribonuclease H [Trifolium pratense]	AT1G69770.1_chromomethylase 3, GeneName=CMT3	IPR001525_C-5 cytosine methyltransferase; IPR023780_Chromo domain; IPR029063_S-adenosyl-L-methionine-dependent methyltransferase; IPR000953_Chromo/chromo shadow domain; IPR016197_Chromo-like domain superfamily	0.06	0.05	0.116667	0.08	0	0.06	0.12	0.07	0.03	0.05	0.07	0.21	0.07	0.12	0	0.12
Am_Rn_000431	9134	XP_020202147.1_clathrin heavy chain 2 [Cajanus cajan] KYP73071.1 Clathrin heavy chain 1 [Cajanus cajan]	AT3G11130.1_Clathrin, heavy chain	IPR015348_Clathrin, heavy chain, linker, core motif; IPR016024_Armadillo-type fold; IPR022365_Clathrin, heavy chain, propeller repeat; IPR016341_Clathrin, heavy chain; IPR000547_Clathrin, heavy chain/VPS, 7-fold repeat; IPR016025_Clathrin heavy chain, N-terminal	1.35	0.646667	1.24667	0.76	1.71	0.69	1.65	1.26	0.29	0.39	3	0.25	0.49	1.44	0.18	0.66
Am_Rn_000432	9131	XP_042379126.1_uncharacterized protein LOC121971764 isoform X1 [Zingiber officinale] XP_042388948.1 uncharacterized protein LOC121980797 [Zingiber officinale] XP_042444503.1 uncharacterized protein LOC122029540 [Zingiber officinale]	AT4G38360.1_organic solute transporter ostalpha protein (DUF300), GeneName=LAZ1	IPR007021_Domain of unknown function DUF659; IPR008906_HAT, C-terminal dimerisation domain; IPR012337_Ribonuclease H-like superfamily	1.05333	1.09333	0.63	0.84	1.31	0.73	1.12	0.78	0.96	1.54	0.06	0.83	1	0.54	0.8	1.18
Am_Rn_000433	9129	GAU32478.1_hypothetical protein TSUD_316850, partial [Trifolium subterraneum]	AT1G58250.1_HYPERSENSITIVE TO PI STARVATION 4, GeneName=SAB	IPR019443_FMP27, C-terminal	0	0.496667	0.306667	0.623333	0	0	0	0.79	0.29	0.41	0.11	0.81	0	0.54	0.56	0.77
Am_Rn_000434	9124	ACD93723.1_phytase, partial [Glycine max]	AT3G07130.1_purple acid phosphatase 15, GeneName=PAP15	IPR004843_Calcineurin-like phosphoesterase domain, ApaH type; IPR029052_Metallo-dependent phosphatase-like	0.326667	1.42667	0.653333	1.32	0.12	0.68	0.18	1.65	1.45	1.18	0.54	0.83	0.59	2.1	1.12	0.74
Am_Rn_000435	9121	.	.	.	3.53	0.23	1.09333	1.02333	2.69	7.53	0.37	0.3	0.26	0.13	1.36	1.72	0.2	2.08	0.86	0.13
Am_Rn_000436	9119	XP_027337807.1_CCR4-NOT transcription complex subunit 1 [Abrus precatorius]	AT1G02080.2_transcription regulator	IPR024557_CCR4-NOT transcription complex subunit 1, domain 4; IPR032191_CCR4-NOT transcription complex subunit 1, CAF1-binding domain; IPR032194_CCR4-NOT transcription complex subunit 1, HEAT repeat; IPR032193_CCR4-NOT transcription complex subunit 1, TTP binding domain	0.306667	0.71	0.32	0.483333	0.69	0	0.23	0.45	0.75	0.93	0.1	0.24	0.62	0.24	0.6	0.61
Am_Rn_000437	9117	XP_027330727.1_E3 ubiquitin-protein ligase UPL2-like [Abrus precatorius] XP_027330728.1 E3 ubiquitin-protein ligase UPL2-like [Abrus precatorius] XP_027330729.1 E3 ubiquitin-protein ligase UPL2-like [Abrus precatorius]	AT1G55860.1_LOW protein: E3 ubiquitin ligase-like protein, GeneName=UPL1	IPR035983_HECT, E3 ligase catalytic domain; IPR025527_HUWE1/Rev1, ubiquitin binding region; IPR000569_HECT domain	1.97333	3.09333	4.93	2.23	0.9	0.71	4.31	6.67	1.41	1.2	8.1	4.44	2.25	5.04	1.24	0.41
Am_Rn_000438	9115	RDX86281.1_S phase cyclin A-associated protein in the endoplasmic reticulum, partial [Mucuna pruriens]	AT5G61260.1_Plant calmodulin-binding protein-like protein	IPR032446_S phase cyclin A-associated protein in the endoplasmic reticulum, N-terminal	7.74333	7.74333	8.67333	10.89	6.24	9.48	7.51	7.21	8.56	7.46	6.69	10.16	9.17	12.03	9.92	10.72
Am_Rn_000439	9105	XP_004504003.1_uncharacterized protein LOC101511453 isoform X1 [Cicer arietinum]	AT4G39420.2_spatacsin carboxy-terminus protein	.	0.246667	0.23	0.13	0.19	0.05	0.2	0.49	0.08	0.37	0.24	0.02	0.04	0.33	0.14	0.08	0.35
Am_Rn_000440	9095	XP_003591076.1_probable serine/threonine-protein kinase PBL7 [Medicago truncatula] AES61327.1 Serine/Threonine kinase family protein [Medicago truncatula] RHN80749.1 putative protein kinase RLK-Pelle-Extensin family [Medicago truncatula]	AT3G05210.1_nucleotide repair protein, GeneName=ERCC1	IPR011335_Restriction endonuclease type II-like; IPR010994_RuvA domain 2-like; IPR004579_ERCC1/RAD10/SWI10 family	6.50333	4.93667	5.21333	8.68	8.73	5.25	5.53	4.15	3.93	6.73	6.02	3.69	5.93	9.31	6.16	10.57
Am_Rn_000441	9091	XP_004511407.1_uncharacterized protein LOC101495944 isoform X2 [Cicer arietinum]	AT5G16680.1_RING/FYVE/PHD zinc finger superfamily protein	IPR011011_Zinc finger, FYVE/PHD-type	1.06667	0.803333	0.296667	0.956667	0.69	0.98	1.53	0.68	1.17	0.56	0.18	0.28	0.43	1.1	0.55	1.22
Am_Rn_000442	9091	XP_027345912.1_DNA-directed RNA polymerase III subunit 1 [Abrus precatorius]	AT5G60040.1_nuclear RNA polymerase C1, GeneName=NRPC1	IPR000722_RNA polymerase, alpha subunit; IPR006592_RNA polymerase, N-terminal; IPR007083_RNA polymerase Rpb1, domain 4; IPR007066_RNA polymerase Rpb1, domain 3; IPR007080_RNA polymerase Rpb1, domain 1	0.526667	0.306667	0.346667	0.186667	0.93	0.27	0.38	0.17	0.56	0.19	0.06	0.56	0.42	0.17	0	0.39
Am_Rn_000443	9079	XP_004500064.1_uncharacterized protein LOC101510812 [Cicer arietinum]	AT4G27010.2_ribosome 60S biogenesis amino-terminal protein, GeneName=EMB2788	IPR021714_Nucleolar pre-ribosomal-associated protein 1, N-terminal; IPR032436_Nucleolar pre-ribosomal-associated protein 1, C-terminal domain	0.356667	1.65333	1.68	1.68333	0.21	0.7	0.16	1.4	2.12	1.44	0.72	2	2.32	1.61	1.51	1.93
Am_Rn_000444	9075	XP_045813232.1_1-phosphatidylinositol-3-phosphate 5-kinase FAB1A isoform X1 [Trifolium pratense] XP_045813233.1 1-phosphatidylinositol-3-phosphate 5-kinase FAB1A isoform X1 [Trifolium pratense] XP_045813234.1 1-phosphatidylinositol-3-phosphate 5-kinase FAB1A isoform X1 [Trifolium pratense] XP_045813235.1 1-phosphatidylinositol-3-phosphate 5-kinase FAB1A isoform X1 [Trifolium pratense] XP_04581323…	AT3G14270.2_phosphatidylinositol-4-phosphate 5-kinase family protein, GeneName=FAB1B	IPR002498_Phosphatidylinositol-4-phosphate 5-kinase, core	0.376667	0.253333	0.26	0.283333	0.14	0.25	0.74	0.26	0.5	0	0.07	0.37	0.34	0.3	0.27	0.28
Am_Rn_000445	9075	BAG72148.1_hypothetical protein [Lotus japonicus] BAG72153.1 hypothetical protein [Lotus japonicus]	ATMG00860.1_DNA/RNA polymerases superfamily protein, GeneName=ORF158	IPR043502_DNA/RNA polymerase superfamily; IPR000477_Reverse transcriptase domain	0.00333333	0.0966667	0.2	0.183333	0	0	0.01	0.1	0.12	0.07	0.11	0.31	0.18	0.16	0.13	0.26
Am_Rn_000446	9073	TKY55886.1_coiled-coil domain-containing protein 73 [Spatholobus suberectus]	AT2G17990.1_polyamine-modulated factor 1-binding protein	.	0.203333	0.726667	0.48	0.68	0.26	0	0.35	0.93	0	1.25	0	0.91	0.53	0	0.72	1.32
Am_Rn_000447	9073	PNY02748.1_hypothetical protein L195_g026067, partial [Trifolium pratense]	AT2G37770.2_NAD(P)-linked oxidoreductase superfamily protein, GeneName=ChlAKR	IPR002423_Chaperonin Cpn60/GroEL/TCP-1 family; IPR027413_GroEL-like equatorial domain superfamily	0.19	0.443333	0.556667	0.323333	0.12	0.13	0.32	0.51	0.42	0.4	0.57	0.64	0.46	0.36	0.27	0.34
Am_Rn_000448	9072	TKY67157.1_DNA ligase 1 [Spatholobus suberectus]	AT1G08130.1_DNA ligase 1, GeneName=LIG1	IPR000977_DNA ligase, ATP-dependent; IPR012308_DNA ligase, ATP-dependent, N-terminal; IPR036599_DNA ligase, ATP-dependent, N-terminal domain superfamily; IPR012310_DNA ligase, ATP-dependent, central; IPR012340_Nucleic acid-binding, OB-fold; IPR012309_DNA ligase, ATP-dependent, C-terminal	0.666667	0.143333	0.01	0.166667	0.53	0.39	1.08	0.1	0.17	0.16	0	0	0.03	0.11	0.04	0.35
Am_Rn_000449	9072	XP_019453510.1_PREDICTED: trichohyalin isoform X2 [Lupinus angustifolius] OIW06246.1 hypothetical protein TanjilG_23303 [Lupinus angustifolius]	AT1G76770.1_HSP20-like chaperones superfamily protein	IPR008978_HSP20-like chaperone	14.87	0.276667	1.24	0.24	3.82	0.82	39.97	0.19	0.38	0.26	1.03	1.33	1.36	0.11	0.29	0.32
Am_Rn_000450	9055	BBG96384.1_ADP glucose pyrophosphorylase large subunit 1 [Prunus dulcis]	AT4G23160.3_cysteine-rich RECEPTOR-like kinase, GeneName=CRK8	IPR005162_Retrotransposon gag domain	0.846667	1.55	1.11	1.71	1.37	0.98	0.19	2	1.91	0.74	0.96	1.63	0.74	2.03	2.1	1
Am_Rn_000451	9053	XP_004509102.1_probable cadmium/zinc-transporting ATPase HMA1, chloroplastic [Cicer arietinum]	AT4G37270.1_heavy metal atpase 1, GeneName=HMA1	IPR036412_HAD-like superfamily; IPR027256_P-type ATPase, subfamily IB; IPR023298_P-type ATPase, transmembrane domain superfamily; IPR001757_P-type ATPase; IPR008250_P-type ATPase, A domain superfamily	1.18667	1.10333	3.57667	3.68	3.56	0	0	3.28	0.02	0.01	1.96	1.95	6.82	4.58	6.46	0
Am_Rn_000452	9051	RZB98077.1_Mediator of RNA polymerase II transcription subunit 7b isoform B [Glycine soja]	AT5G03220.1_Mediator complex, subunit Med7	IPR037212_Mediator complex, subunit Med7/Med21-like; IPR009244_Mediator complex, subunit Med7	0.02	0.36	0.713333	0.146667	0	0.05	0.01	0.64	0.21	0.23	0.23	1.57	0.34	0.12	0.32	0
Am_Rn_000453	9048	RZB70463.1_Transposon Ty3-G Gag-Pol polyprotein [Glycine soja]	ATMG00860.1_DNA/RNA polymerases superfamily protein, GeneName=ORF158	IPR043502_DNA/RNA polymerase superfamily; IPR041577_Reverse transcriptase/retrotransposon-derived protein, RNase H-like domain; IPR041588_Integrase zinc-binding domain	0.05	0.826667	0.513333	0.886667	0.04	0.04	0.07	1.24	0.48	0.76	0.17	0.35	1.02	0.64	0.68	1.34
Am_Rn_000454	9046	MCH95732.1_root phototropism protein 3-like [Trifolium medium]	AT5G64330.3_Phototropic-responsive NPH3 family protein, GeneName=NPH3	IPR003340_B3 DNA binding domain; IPR015300_DNA-binding pseudobarrel domain superfamily	0.106667	0	0.36	1.63	0.32	0	0	0	0	0	1.08	0	0	0.76	1.32	2.81
Am_Rn_000455	9043	XP_027331267.1_phospholipase A I-like [Abrus precatorius]	AT1G61850.2_phospholipase A I-like protein	IPR016035_Acyl transferase/acyl hydrolase/lysophospholipase	0.0366667	0.136667	0.133333	0.05	0	0.02	0.09	0.08	0.17	0.16	0.15	0.25	0	0.15	0	0
Am_Rn_000456	9043	MCH85394.1_LINE-1 reverse transcriptase like [Trifolium medium]	AT4G25300.1_2-oxoglutarate (2OG) and Fe(II)-dependent oxygenase superfamily protein	IPR005162_Retrotransposon gag domain	0.213333	0	0.44	0.61	0.16	0.48	0	0	0	0	0.03	0.85	0.44	0.16	1.22	0.45
Am_Rn_000457	9034	GAU30895.1_hypothetical protein TSUD_381080 [Trifolium subterraneum]	AT1G03220.1_Eukaryotic aspartyl protease family protein	IPR032861_Xylanase inhibitor, N-terminal; IPR032799_Xylanase inhibitor, C-terminal; IPR021109_Aspartic peptidase domain superfamily	0.126667	1.63667	6.52667	3.26	0.15	0.18	0.05	0.97	2.37	1.57	5.45	7.37	6.76	2.39	3.68	3.71
Am_Rn_000458	9032	XP_045807115.1_uncharacterized protein LOC123899897 isoform X1 [Trifolium pratense]	AT1G16800.2_P-loop containing nucleoside triphosphate hydrolases superfamily protein	IPR041677_DNA2/NAM7 helicase, helicase domain; IPR041679_DNA2/NAM7 helicase-like, C-terminal; IPR027417_P-loop containing nucleoside triphosphate hydrolase	0.516667	2.46667	2.04667	1.54333	0.7	0.49	0.36	2.64	2.42	2.34	0.82	2.3	3.02	1.14	1.73	1.76
Am_Rn_000459	9026	XP_004509102.1_probable cadmium/zinc-transporting ATPase HMA1, chloroplastic [Cicer arietinum]	AT4G37270.1_heavy metal atpase 1, GeneName=HMA1	IPR036412_HAD-like superfamily; IPR027256_P-type ATPase, subfamily IB; IPR023298_P-type ATPase, transmembrane domain superfamily; IPR001757_P-type ATPase; IPR008250_P-type ATPase, A domain superfamily	3.59	27.96	6.77333	12.2633	0	7.22	3.55	24.93	28.15	30.8	4.11	10.44	5.77	9.09	9.78	17.92
Am_Rn_000460	9024	XP_012573521.1_dicer-like protein 4 isoform X5 [Cicer arietinum]	AT5G20320.1_dicer-like 4, GeneName=DCL4	IPR001650_Helicase, C-terminal; IPR003100_PAZ domain; IPR000999_Ribonuclease III domain; IPR027417_P-loop containing nucleoside triphosphate hydrolase; IPR036389_Ribonuclease III, endonuclease domain superfamily; IPR014720_Double-stranded RNA-binding domain	82.78	48.0267	46.01	97.6933	45.74	146.06	56.54	27.04	64.41	52.63	32.29	55.79	49.95	78.62	125.45	89.01
Am_Rn_000461	9020	GAU37771.1_hypothetical protein TSUD_102880 [Trifolium subterraneum]	AT5G44290.7_Protein kinase superfamily protein	IPR026960_Reverse transcriptase zinc-binding domain; IPR012337_Ribonuclease H-like superfamily; IPR000477_Reverse transcriptase domain; IPR002156_Ribonuclease H domain; IPR043502_DNA/RNA polymerase superfamily	0.31	0.0966667	0.02	0.26	0.25	0.19	0.49	0.21	0.06	0.02	0.06	0	0	0.62	0	0.16
Am_Rn_000462	9018	PNY10806.1_histone deacetylase [Trifolium pratense]	AT4G23160.3_cysteine-rich RECEPTOR-like kinase, GeneName=CRK8	IPR001584_Integrase, catalytic core; IPR012337_Ribonuclease H-like superfamily; IPR013103_Reverse transcriptase, RNA-dependent DNA polymerase; IPR043502_DNA/RNA polymerase superfamily; IPR025724_GAG-pre-integrase domain	3.50667	23.2933	9.66333	10.2	4.57	3.8	2.15	30.8	27.21	11.87	7.22	14.12	7.65	8.06	13.16	9.38
Am_Rn_000463	9016	XP_004497763.1_protein BLISTER [Cicer arietinum]	AT3G23980.1_BLISTER, GeneName=BLI	.	0.163333	0.266667	0.15	0.16	0.07	0.05	0.37	0.15	0.54	0.11	0.05	0.16	0.24	0.08	0.13	0.27
Am_Rn_000464	9016	XP_024638708.1_extracellular ribonuclease isoform X2 [Medicago truncatula]	.	IPR044925_His-Me finger superfamily; IPR007346_Endonuclease I	0.396667	0.78	0.196667	0.213333	0	0.75	0.44	1.44	0.48	0.42	0.16	0.24	0.19	0.22	0.34	0.08
Am_Rn_000465	9013	TKY47855.1_Mediator of RNA polymerase II transcription subunit 13 [Spatholobus suberectus]	AT1G55325.2_RNA polymerase II transcription mediator, GeneName=GCT	IPR009401_Mediator complex subunit Med13, C-terminal; IPR041285_MID domain of medPIWI	0.11	0.206667	0.18	0.0333333	0.24	0.09	0	0.36	0.17	0.09	0.04	0	0.5	0	0.1	0
Am_Rn_000466	9010	XP_039690108.1_uncharacterized protein LOC25482784 [Medicago truncatula] XP_039690112.1 uncharacterized protein LOC25482784 [Medicago truncatula]	AT4G27190.1_NB-ARC domain-containing disease resistance protein	IPR003591_Leucine-rich repeat, typical subtype; IPR001611_Leucine-rich repeat; IPR002182_NB-ARC; IPR003593_AAA+ ATPase domain; IPR027417_P-loop containing nucleoside triphosphate hydrolase	26.1933	20.8733	9.28333	16.7767	23.35	24.46	30.77	14.84	27.06	20.72	2.8	14.02	11.03	9.81	22.64	17.88
Am_Rn_000467	9004	PNY05002.1_putative copia-type polyprotein [Trifolium pratense]	ATMG00810.1_DNA/RNA polymerases superfamily protein, GeneName=ORF240B	IPR025724_GAG-pre-integrase domain; IPR001878_Zinc finger, CCHC-type; IPR001584_Integrase, catalytic core; IPR012337_Ribonuclease H-like superfamily; IPR036875_Zinc finger, CCHC-type superfamily	0.04	0.0333333	0.0333333	0.0433333	0.08	0.04	0	0.05	0.05	0	0	0.07	0.03	0.13	0	0
Am_Rn_000468	9000	GAU31768.1_hypothetical protein TSUD_22140 [Trifolium subterraneum]	AT1G64680.1_beta-carotene isomerase D27	IPR026960_Reverse transcriptase zinc-binding domain	0.0933333	25.8067	7.17667	2.94	0.2	0.05	0.03	31.71	21.93	23.78	5.46	7.36	8.71	3.05	2.27	3.5
Am_Rn_000469	8999	XP_012568314.1_ABC transporter C family member 2-like [Cicer arietinum] XP_012568316.1 ABC transporter C family member 2-like [Cicer arietinum] XP_012568318.1 ABC transporter C family member 2-like [Cicer arietinum] XP_012568323.1 ABC transporter C family member 2-like [Cicer arietinum]	AT2G34660.2_multidrug resistance-associated protein 2, GeneName=ABCC2	IPR036640_ABC transporter type 1, transmembrane domain superfamily; IPR003593_AAA+ ATPase domain; IPR011527_ABC transporter type 1, transmembrane domain; IPR027417_P-loop containing nucleoside triphosphate hydrolase; IPR003439_ABC transporter-like, ATP-binding domain	0.82	0	0.143333	0	1.38	0.5	0.58	0	0	0	0	0.43	0	0	0	0
Am_Rn_000470	8999	XP_012571648.1_kinesin-like protein KIN-4A [Cicer arietinum]	AT5G47820.1_P-loop containing nucleoside triphosphate hydrolases superfamily protein, GeneName=FRA1	IPR001752_Kinesin motor domain; IPR027417_P-loop containing nucleoside triphosphate hydrolase	0.206667	0.133333	0.133333	0.356667	0.21	0.05	0.36	0	0.2	0.2	0.25	0.08	0.07	0.58	0.28	0.21
Am_Rn_000471	8998	YP_009237616.1_ATPase subunit 1 [Medicago truncatula] AML26827.1 ATPase subunit 1 [Medicago truncatula]	ATMG01190.1_ATP synthase subunit 1, GeneName=ATP1	IPR000793_ATP synthase, alpha subunit, C-terminal; IPR005294_ATP synthase, F1 complex, alpha subunit; IPR004100_ATPase, F1/V1/A1 complex, alpha/beta subunit, N-terminal domain; IPR027417_P-loop containing nucleoside triphosphate hydrolase; IPR036121_ATPase, F1/V1/A1 complex, alpha/beta subunit, N-terminal domain superfamily; IPR000194_ATPase, F1/V1/A1 complex, alpha/beta subunit, nucleotide-bindi…	0	0.0766667	0.293333	0.02	0	0	0	0.23	0	0	0.27	0.44	0.17	0.06	0	0
Am_Rn_000472	8997	XP_045787692.1_midasin-like [Trifolium pratense]	AT1G67120.1_midasin-like protein	IPR040848_Midasin, AAA lid domain 7; IPR027417_P-loop containing nucleoside triphosphate hydrolase; IPR011704_ATPase, dynein-related, AAA domain	0.253333	0.423333	0.27	0.456667	0.76	0	0	0.57	0	0.7	0.22	0	0.59	0.8	0	0.57
Am_Rn_000473	8993	BAG72151.1_hypothetical protein [Lotus japonicus]	AT3G23300.1_S-adenosyl-L-methionine-dependent methyltransferases superfamily protein	IPR016197_Chromo-like domain superfamily; IPR043502_DNA/RNA polymerase superfamily; IPR041588_Integrase zinc-binding domain; IPR041577_Reverse transcriptase/retrotransposon-derived protein, RNase H-like domain; IPR005162_Retrotransposon gag domain; IPR000477_Reverse transcriptase domain; IPR012337_Ribonuclease H-like superfamily	0.786667	4.27	2.37333	4.26667	0	0	2.36	4.06	0.58	8.17	0.7	1.08	5.34	5.79	0	7.01
Am_Rn_000474	8992	PRQ52345.1_putative RNA-directed DNA polymerase [Rosa chinensis]	AT4G23160.3_cysteine-rich RECEPTOR-like kinase, GeneName=CRK8	IPR036875_Zinc finger, CCHC-type superfamily; IPR013103_Reverse transcriptase, RNA-dependent DNA polymerase; IPR025724_GAG-pre-integrase domain; IPR001584_Integrase, catalytic core; IPR012337_Ribonuclease H-like superfamily; IPR043502_DNA/RNA polymerase superfamily	0.473333	1.56	1.84333	1.28667	1.29	0	0.13	1.95	2.73	0	0	3.21	2.32	0	2.69	1.17
Am_Rn_000475	8984	XP_004501538.1_metal transporter Nramp2-like [Cicer arietinum] XP_027190399.1 metal transporter Nramp2-like [Cicer arietinum]	AT1G47240.1_NRAMP metal ion transporter 2, GeneName=NRAMP2	IPR018289_MULE transposase domain	25.7367	11.55	9.84667	8.93333	21.27	29.66	26.28	12.9	10.39	11.36	8.55	10.18	10.81	12.25	7.49	7.06
Am_Rn_000476	8983	XP_020237991.1_E3 ubiquitin-protein ligase UPL3 [Cajanus cajan]	AT4G38600.1_HECT ubiquitin protein ligase family protein KAK, GeneName=KAK	IPR000569_HECT domain; IPR016024_Armadillo-type fold; IPR035983_HECT, E3 ligase catalytic domain	18.7467	25.4133	19.2	26.2	13.94	27.31	14.99	26.99	26.77	22.48	12.55	25.49	19.56	23.24	27.67	27.69
Am_Rn_000477	8979	TKY55886.1_coiled-coil domain-containing protein 73 [Spatholobus suberectus]	AT2G17990.1_polyamine-modulated factor 1-binding protein	.	1.01333	0.76	0.963333	0.606667	1.24	1.67	0.13	0.28	1.44	0.56	2.19	0.28	0.42	1.37	0.39	0.06
Am_Rn_000478	8976	KAH1140443.1_hypothetical protein GYH30_029367 [Glycine max]	ATMG00860.1_DNA/RNA polymerases superfamily protein, GeneName=ORF158	IPR021109_Aspartic peptidase domain superfamily; IPR005162_Retrotransposon gag domain; IPR000477_Reverse transcriptase domain; IPR041577_Reverse transcriptase/retrotransposon-derived protein, RNase H-like domain; IPR016197_Chromo-like domain superfamily; IPR041588_Integrase zinc-binding domain; IPR043502_DNA/RNA polymerase superfamily; IPR012337_Ribonuclease H-like superfamily	0.0533333	0.09	2.10333	0.29	0.1	0.06	0	0.01	0.12	0.14	0.49	3.55	2.27	0.07	0.28	0.52
Am_Rn_000479	8972	GAU26239.1_hypothetical protein TSUD_224300 [Trifolium subterraneum]	AT4G20520.1_RNA binding / RNA-directed DNA polymerase	IPR000477_Reverse transcriptase domain; IPR043502_DNA/RNA polymerase superfamily	3.69	5.33	3.57	5.85	6.14	3.47	1.46	4.91	5.94	5.14	1.92	4.29	4.5	5.07	6.81	5.67
Am_Rn_000480	8971	XP_027355255.1_G-type lectin S-receptor-like serine/threonine-protein kinase At4g27290 [Abrus precatorius]	AT4G27290.2_S-locus lectin protein kinase family protein	IPR035446_S-locus-specific glycoprotein/EP1; IPR000858_S-locus glycoprotein domain; IPR036426_Bulb-type lectin domain superfamily; IPR001480_Bulb-type lectin domain; IPR003609_PAN/Apple domain	0.333333	0.0233333	0.00666667	0.22	0.63	0.13	0.24	0.07	0	0	0	0	0.02	0.47	0.16	0.03
Am_Rn_000481	8955	XP_012568314.1_ABC transporter C family member 2-like [Cicer arietinum] XP_012568316.1 ABC transporter C family member 2-like [Cicer arietinum] XP_012568318.1 ABC transporter C family member 2-like [Cicer arietinum] XP_012568323.1 ABC transporter C family member 2-like [Cicer arietinum]	AT2G34660.2_multidrug resistance-associated protein 2, GeneName=ABCC2	IPR036640_ABC transporter type 1, transmembrane domain superfamily; IPR003593_AAA+ ATPase domain; IPR011527_ABC transporter type 1, transmembrane domain; IPR027417_P-loop containing nucleoside triphosphate hydrolase; IPR003439_ABC transporter-like, ATP-binding domain	0	0.473333	0.216667	0.463333	0	0	0	0.3	0.84	0.28	0.07	0.23	0.35	0.18	0.29	0.92
Am_Rn_000482	8946	KYP67396.1_Target of rapamycin [Cajanus cajan]	AT1G50030.1_target of rapamycin, GeneName=TOR	IPR036738_FKBP12-rapamycin binding domain superfamily; IPR024585_Domain of unknown function DUF3385, target of rapamycin protein; IPR003151_PIK-related kinase, FAT; IPR003152_FATC domain; IPR000403_Phosphatidylinositol 3-/4-kinase, catalytic domain; IPR011990_Tetratricopeptide-like helical domain superfamily; IPR011009_Protein kinase-like domain superfamily; IPR016024_Armadillo-type fold; IPR0090…	0.296667	0.476667	0.253333	0.286667	0.11	0.11	0.67	0.42	0.62	0.39	0.29	0.36	0.11	0.25	0.14	0.47
Am_Rn_000483	8945	XP_004493756.1_cytochrome P450 94A1-like [Cicer arietinum]	AT2G30630.2_P-loop containing nucleoside triphosphate hydrolases superfamily protein	IPR002401_Cytochrome P450, E-class, group I; IPR001128_Cytochrome P450; IPR036396_Cytochrome P450 superfamily	0.2	1.20667	0.316667	0.206667	0.32	0.23	0.05	0.81	2.23	0.58	0.18	0.55	0.22	0.24	0.17	0.21
Am_Rn_000484	8942	XP_006591464.1_4-methyl-5-nitrocatechol 5-monooxygenase isoform X2 [Glycine max] XP_028197721.1 uncharacterized protein LOC114382473 isoform X1 [Glycine soja] KAH1160720.1 hypothetical protein GYH30_032145 [Glycine max] KAH1226865.1 putative polyketide hydroxylase [Glycine max] KRH31438.1 hypothetical protein GLYMA_11G248400v4 [Glycine max] RZB73303.1 putative polyketide hydroxylase isoform A [Gl…	AT1G24340.1_FAD/NAD(P)-binding oxidoreductase family protein, GeneName=EMB2421	IPR002938_FAD-binding domain; IPR036188_FAD/NAD(P)-binding domain superfamily	0.746667	1.03333	0.853333	0.276667	0.46	0.75	1.03	1.42	0.85	0.83	0.3	1.52	0.74	0.23	0.5	0.1
Am_Rn_000485	8941	XP_004493407.1_ferredoxin-dependent glutamate synthase, chloroplastic [Cicer arietinum]	AT5G04140.2_glutamate synthase 1, GeneName=GLU1	IPR036485_Glutamate synthase, alpha subunit, C-terminal domain superfamily; IPR002489_Glutamate synthase, alpha subunit, C-terminal; IPR029055_Nucleophile aminohydrolases, N-terminal; IPR017932_Glutamine amidotransferase type 2 domain; IPR006982_Glutamate synthase, central-N; IPR002932_Glutamate synthase domain	0.146667	1.85	1.24667	1.15333	0.15	0.1	0.19	2.82	1.31	1.42	0.96	1.26	1.52	1.76	0.62	1.08
Am_Rn_000486	8935	XP_004493407.1_ferredoxin-dependent glutamate synthase, chloroplastic [Cicer arietinum]	AT5G04140.2_glutamate synthase 1, GeneName=GLU1	IPR036485_Glutamate synthase, alpha subunit, C-terminal domain superfamily; IPR002489_Glutamate synthase, alpha subunit, C-terminal; IPR029055_Nucleophile aminohydrolases, N-terminal; IPR017932_Glutamine amidotransferase type 2 domain; IPR006982_Glutamate synthase, central-N; IPR002932_Glutamate synthase domain	3.39	24.3667	11.4833	10.6167	2.85	5.16	2.16	25.77	27.28	20.05	7.72	15.66	11.07	10.07	11.6	10.18
Am_Rn_000487	8922	XP_045803755.1_sister chromatid cohesion protein PDS5 homolog A-like isoform X1 [Trifolium pratense]	AT5G47690.1_binding protein	IPR016024_Armadillo-type fold	0.206667	0.396667	0.513333	0.306667	0.18	0.31	0.13	0.62	0.25	0.32	0.23	0.4	0.91	0.32	0.46	0.14
Am_Rn_000488	8920	XP_004504405.1_calmodulin-binding transcription activator 4 isoform X4 [Cicer arietinum]	AT1G67310.1_Calmodulin-binding transcription activator protein with CG-1 and Ankyrin domain	IPR002909_IPT domain; IPR027417_P-loop containing nucleoside triphosphate hydrolase; IPR000048_IQ motif, EF-hand binding site; IPR002110_Ankyrin repeat; IPR005559_CG-1 DNA-binding domain; IPR036770_Ankyrin repeat-containing domain superfamily; IPR014756_Immunoglobulin E-set	0.95	1.26333	1.81333	1.75333	0	1.11	1.74	1.25	1.42	1.12	1.97	2.48	0.99	3.9	1.36	0
Am_Rn_000489	8914	PNY07558.1_gag-pol polyprotein [Trifolium pratense]	.	.	0.633333	0.183333	0.0833333	1.09667	0.2	1.24	0.46	0	0.15	0.4	0.09	0	0.16	0	0.56	2.73
Am_Rn_000490	8902	XP_045819740.1_serine/threonine-protein kinase SMG1-like isoform X2 [Trifolium pratense]	AT5G40820.3_Ataxia telangiectasia-mutated and RAD3-like protein, GeneName=ATR	IPR011009_Protein kinase-like domain superfamily; IPR000403_Phosphatidylinositol 3-/4-kinase, catalytic domain	0.54	0.353333	1.08333	0.51	0.6	0.16	0.86	0.23	0.48	0.35	2.67	0.26	0.32	0.88	0.39	0.26
Am_Rn_000491	8898	XP_004499141.1_uncharacterized protein LOC101507508 [Cicer arietinum]	AT5G42950.1_GYF domain-containing protein	IPR035445_GYF-like domain superfamily; IPR003169_GYF domain	2.11667	0.743333	0.69	1.13	0.53	2.28	3.54	1.21	0.56	0.46	0.35	0.33	1.39	2.68	0.18	0.53
Am_Rn_000492	8897	PNX78885.1_hypothetical protein L195_g034867 [Trifolium pratense]	.	.	1.51333	1.19	0.52	2.51667	1.27	2.36	0.91	0.59	2.33	0.65	0.23	0.94	0.39	1.34	5.43	0.78
Am_Rn_000493	8896	XP_012567955.1_histone acetyltransferase HAC1-like [Cicer arietinum]	AT1G79000.1_histone acetyltransferase of the CBP family 1, GeneName=HAC1	IPR013178_Histone acetyltransferase Rtt109/CBP; IPR000197_Zinc finger, TAZ-type; IPR011011_Zinc finger, FYVE/PHD-type; IPR035898_TAZ domain superfamily; IPR000433_Zinc finger, ZZ-type; IPR019787_Zinc finger, PHD-finger	0.596667	0.58	0.29	0.543333	0.17	0.41	1.21	0.73	1.01	0	0	0	0.87	0.36	0.76	0.51
Am_Rn_000494	8895	XP_012574126.2_LOW QUALITY PROTEIN: NAC domain-containing protein 69-like [Cicer arietinum]	AT4G35580.1_NAC transcription factor-like 9, GeneName=NTL9	IPR036093_NAC domain superfamily; IPR003441_NAC domain	1.15	0.31	1.11	0.8	0.23	3.11	0.11	0.24	0.35	0.34	0.62	1.38	1.33	0.56	1.02	0.82
Am_Rn_000495	8891	BAG72151.1_hypothetical protein [Lotus japonicus]	AT2G46380.2_extra-large G-like protein, putative (DUF3133)	IPR016197_Chromo-like domain superfamily; IPR043502_DNA/RNA polymerase superfamily; IPR041588_Integrase zinc-binding domain; IPR041577_Reverse transcriptase/retrotransposon-derived protein, RNase H-like domain; IPR005162_Retrotransposon gag domain; IPR000477_Reverse transcriptase domain; IPR012337_Ribonuclease H-like superfamily	2.73	1.28	0.703333	2.92	0.49	0.54	7.16	1.87	0	1.97	0	0	2.11	1.95	0.65	6.16
Am_Rn_000496	8889	PNX95999.1_UDP-glycosyltransferase 74B1-like protein [Trifolium pratense]	AT1G24100.1_UDP-glucosyl transferase 74B1, GeneName=UGT74B1	IPR001611_Leucine-rich repeat	0.0866667	0.08	0.206667	0.226667	0	0.26	0	0.15	0.05	0.04	0.29	0.33	0	0.15	0.28	0.25
Am_Rn_000497	8885	XP_027191607.1_cell morphogenesis protein PAG1 isoform X1 [Cicer arietinum]	AT5G15680.1_ARM repeat superfamily protein	IPR025481_Cell morphogenesis protein C-terminal; IPR029473_Cell morphogenesis central region; IPR016024_Armadillo-type fold	0.236667	0.393333	0.463333	0.51	0.05	0.28	0.38	0.46	0.49	0.23	0.05	0.73	0.61	0.49	0.68	0.36
Am_Rn_000498	8875	GAU32478.1_hypothetical protein TSUD_316850, partial [Trifolium subterraneum]	AT1G58250.1_HYPERSENSITIVE TO PI STARVATION 4, GeneName=SAB	IPR019443_FMP27, C-terminal	0.0333333	0.263333	0.34	0.853333	0.05	0.05	0	0.59	0.2	0	0.62	0	0.4	1.42	0.61	0.53
Am_Rn_000499	8871	XP_027356341.1_zinc finger CCCH domain-containing protein 19 [Abrus precatorius]	AT2G16485.2_GW repeat- and PHD finger-containing protein NERD, GeneName=NERD	IPR036128_Plus3-like superfamily; IPR011011_Zinc finger, FYVE/PHD-type; IPR019835_SWIB domain; IPR004343_Plus-3 domain; IPR001965_Zinc finger, PHD-type; IPR036885_SWIB/MDM2 domain superfamily; IPR003121_SWIB/MDM2 domain	1.00667	0.533333	0.723333	0.62	1.14	0.75	1.13	0.4	0.69	0.51	0.57	0.58	1.02	1.05	0	0.81
Am_Rn_000500	8867	ABN08111.1_Protein of unknown function DUF946, plant [Medicago truncatula] AES66088.1 DUF946 family protein [Medicago truncatula]	AT5G24530.1_2-oxoglutarate (2OG) and Fe(II)-dependent oxygenase superfamily protein, GeneName=DMR6	IPR009291_Vacuolar protein sorting-associated protein 62	6.68333	3.81667	0.79	7.84	1.13	6.15	12.77	6.99	2.17	2.29	0.7	0.66	1.01	19.31	1.2	3.01
Am_Rn_000501	8866	RDX68773.1_Protein CHROMATIN REMODELING 4, partial [Mucuna pruriens]	AT5G44800.1_chromatin remodeling 4, GeneName=CHR4	IPR023780_Chromo domain; IPR001965_Zinc finger, PHD-type; IPR016197_Chromo-like domain superfamily; IPR001650_Helicase, C-terminal; IPR019787_Zinc finger, PHD-finger; IPR000330_SNF2, N-terminal; IPR014001_Helicase superfamily 1/2, ATP-binding domain; IPR027417_P-loop containing nucleoside triphosphate hydrolase; IPR000953_Chromo/chromo shadow domain; IPR011011_Zinc finger, FYVE/PHD-type	0.02	0.393333	0.223333	0.366667	0	0	0.06	0.43	0.56	0.19	0	0.2	0.47	0.1	0.35	0.65
Am_Rn_000502	8863	MCH80451.1_retrotransposon protein [Trifolium medium]	AT5G22800.1_Alanyl-tRNA synthetase, class IIc, GeneName=EMB1030	IPR001878_Zinc finger, CCHC-type; IPR041577_Reverse transcriptase/retrotransposon-derived protein, RNase H-like domain; IPR021109_Aspartic peptidase domain superfamily; IPR036875_Zinc finger, CCHC-type superfamily; IPR000477_Reverse transcriptase domain; IPR043502_DNA/RNA polymerase superfamily	1.12333	0.73	0.91	0.873333	1.97	0.79	0.61	0.98	0.65	0.56	0.57	1.21	0.95	0.93	1.04	0.65
Am_Rn_000503	8858	KYP76436.1_Retrovirus-related Pol polyprotein from transposon TNT 1-94 [Cajanus cajan]	AT4G01550.1_NAC domain containing protein 69, GeneName=NAC069	IPR003441_NAC domain; IPR036093_NAC domain superfamily	0.64	0.67	0.633333	0.616667	0.26	0.97	0.69	0.89	0.61	0.51	0.74	0.59	0.57	1	0.43	0.42
Am_Rn_000504	8856	XP_012569579.1_protein ILITYHIA [Cicer arietinum]	AT1G64790.3_ILITYHIA, GeneName=ILA	IPR016024_Armadillo-type fold	0.21	0.116667	0.136667	0.0933333	0.26	0.11	0.26	0.16	0.11	0.08	0.07	0.06	0.28	0.1	0.06	0.12
Am_Rn_000505	8856	XP_039687849.1_uncharacterized protein LOC120579509 [Medicago truncatula]	AT3G09350.1_Fes1A, GeneName=Fes1A	IPR013918_Nucleotide exchange factor Fes1; IPR000225_Armadillo; IPR016024_Armadillo-type fold; IPR034085_TOG domain	1.39667	0.65	0.406667	0.386667	1.1	0.51	2.58	0.34	1.08	0.53	0.14	0.67	0.41	0.5	0.41	0.25
Am_Rn_000506	8853	PNX98275.1_gag-pol polyprotein [Trifolium pratense]	.	IPR012337_Ribonuclease H-like superfamily	0.0633333	0.67	0.82	0.636667	0.04	0.15	0	1	1.01	0	0.93	1.53	0	0.81	1.1	0
Am_Rn_000507	8851	TKY55065.1_Formin protein 20 [Spatholobus suberectus]	AT5G07740.3_actin binding protein	IPR015425_Formin, FH2 domain; IPR014020_Tensin phosphatase, C2 domain; IPR029021_Protein-tyrosine phosphatase-like; IPR035892_C2 domain superfamily	0.57	0.643333	0.71	0.926667	0.7	0.65	0.36	0.46	0.65	0.82	0.37	1.02	0.74	0.77	1.27	0.74
Am_Rn_000508	8848	PNY00884.1_retrotransposon-related protein, partial [Trifolium pratense]	ATMG00860.1_DNA/RNA polymerases superfamily protein, GeneName=ORF158	IPR004312_Arabidopsis retrotransposon Orf1	0.586667	0.0266667	0	0	0.88	0.21	0.67	0.08	0	0	0	0	0	0	0	0
Am_Rn_000509	8846	PNY09528.1_RNA-binding protein [Trifolium pratense]	AT2G41060.1_RNA-binding (RRM/RBD/RNP motifs) family protein	IPR000504_RNA recognition motif domain; IPR035979_RNA-binding domain superfamily	4.03333	2.00667	1.34333	3.59333	3.5	5.21	3.39	2.78	1.73	1.51	2.11	0.95	0.97	4.09	4.59	2.1
Am_Rn_000510	8834	KAG8487839.1_hypothetical protein CXB51_018073 [Gossypium anomalum]	AT4G23160.3_cysteine-rich RECEPTOR-like kinase, GeneName=CRK8	IPR001584_Integrase, catalytic core; IPR013103_Reverse transcriptase, RNA-dependent DNA polymerase; IPR043502_DNA/RNA polymerase superfamily; IPR012337_Ribonuclease H-like superfamily; IPR025724_GAG-pre-integrase domain	3.99667	1.77333	1.55333	2.26333	9.28	1.36	1.35	2.03	1.69	1.6	0.82	2.26	1.58	2.17	2.7	1.92
Am_Rn_000511	8830	KYP42564.1_Retrovirus-related Pol polyprotein from transposon TNT 1-94 [Cajanus cajan]	AT1G68390.1_Core-2/I-branching beta-1,6-N-acetylglucosaminyltransferase family protein	IPR001584_Integrase, catalytic core; IPR025724_GAG-pre-integrase domain; IPR012337_Ribonuclease H-like superfamily	0.0333333	0.19	0.17	0.32	0	0.08	0.02	0.43	0.14	0	0.33	0.18	0	0.7	0.23	0.03
Am_Rn_000512	8827	KAG4378277.1_hypothetical protein GLYMA_17G008400v4 [Glycine max] RZB54586.1 E3 ubiquitin-protein ligase UPL5 isoform B [Glycine soja]	AT4G12570.1_ubiquitin protein ligase 5, GeneName=UPL5	IPR000626_Ubiquitin-like domain; IPR000569_HECT domain; IPR035983_HECT, E3 ligase catalytic domain; IPR029071_Ubiquitin-like domain superfamily	3.10333	1.23667	0.663333	2.25667	3.56	3	2.75	1.08	1.51	1.12	0.41	0.93	0.65	3.06	2.12	1.59
Am_Rn_000513	8827	BAG72148.1_hypothetical protein [Lotus japonicus] BAG72153.1 hypothetical protein [Lotus japonicus]	AT1G04010.1_phospholipid sterol acyl transferase 1, GeneName=PSAT1	IPR041577_Reverse transcriptase/retrotransposon-derived protein, RNase H-like domain; IPR041588_Integrase zinc-binding domain; IPR043502_DNA/RNA polymerase superfamily	0.376667	0.293333	0.36	0.366667	0.11	0.33	0.69	0.13	0.39	0.36	0.2	0.42	0.46	0.47	0.41	0.22
Am_Rn_000514	8827	GAU33038.1_hypothetical protein TSUD_151930, partial [Trifolium subterraneum]	AT5G51795.1_DNA/RNA-binding protein Kin17, conserved region	IPR000477_Reverse transcriptase domain; IPR043502_DNA/RNA polymerase superfamily; IPR041577_Reverse transcriptase/retrotransposon-derived protein, RNase H-like domain	1.33333	1.59	0.683333	0.856667	2.13	0.95	0.92	1.48	1.96	1.33	0.27	0.99	0.79	0.8	1.05	0.72
Am_Rn_000515	8824	XP_004504405.1_calmodulin-binding transcription activator 4 isoform X4 [Cicer arietinum]	AT1G67310.1_Calmodulin-binding transcription activator protein with CG-1 and Ankyrin domain	IPR002909_IPT domain; IPR027417_P-loop containing nucleoside triphosphate hydrolase; IPR000048_IQ motif, EF-hand binding site; IPR002110_Ankyrin repeat; IPR005559_CG-1 DNA-binding domain; IPR036770_Ankyrin repeat-containing domain superfamily; IPR014756_Immunoglobulin E-set	12.8067	8.33667	6.60333	8.06	16.93	16.88	4.61	8.24	9.7	7.07	1.74	9.25	8.82	5.24	8.15	10.79
Am_Rn_000516	8815	MCH80348.1_hypothetical protein [Trifolium medium]	ATMG01250.1_RNA-directed DNA polymerase (reverse transcriptase), GeneName=ORF102	IPR025836_Zinc knuckle CX2CX4HX4C	0.04	1.46333	0.393333	2.18	0.07	0	0.05	0.57	1.21	2.61	0.14	0.45	0.59	2.37	1.35	2.82
Am_Rn_000517	8814	XP_003517639.1_receptor-like protein kinase HSL1 [Glycine max] XP_028226676.1 receptor-like protein kinase HSL1 [Glycine soja] KAH1161010.1 hypothetical protein GYH30_000076 [Glycine max] KAH1264088.1 Receptor-like protein kinase HSL1 [Glycine max] KRH74250.1 hypothetical protein GLYMA_01G007500v4 [Glycine max] RZC27852.1 Receptor-like protein kinase HSL1 [Glycine soja]	AT5G25930.1_kinase family with leucine-rich repeat domain-containing protein	IPR013210_Leucine-rich repeat-containing N-terminal, plant-type; IPR011009_Protein kinase-like domain superfamily; IPR000719_Protein kinase domain; IPR001611_Leucine-rich repeat; IPR003591_Leucine-rich repeat, typical subtype; IPR025875_Leucine rich repeat 4	4.17333	2.74333	1.94667	4.05	6.64	1.78	4.1	3.37	1.63	3.23	0.63	3.08	2.13	6.93	2.25	2.97
Am_Rn_000518	8809	KHN21230.1_Retrovirus-related Pol polyprotein from transposon TNT 1-94, partial [Glycine soja]	AT2G21630.1_Sec23/Sec24 protein transport family protein	IPR013103_Reverse transcriptase, RNA-dependent DNA polymerase; IPR043502_DNA/RNA polymerase superfamily	0.34	0.526667	0.383333	0.553333	0.64	0.09	0.29	0.58	0.19	0.81	0.13	0.12	0.9	0.43	0.36	0.87
Am_Rn_000519	8807	XP_024634147.1_helicase SEN1 [Medicago truncatula]	AT1G65780.1_P-loop containing nucleoside triphosphate hydrolases superfamily protein	IPR041679_DNA2/NAM7 helicase-like, C-terminal; IPR045529_Domain of unknown function DUF6469; IPR041677_DNA2/NAM7 helicase, helicase domain; IPR027417_P-loop containing nucleoside triphosphate hydrolase	9.16667	3.05	3.94333	7.04333	13.35	7.44	6.71	2.49	3.57	3.09	2.86	5.56	3.41	5.34	7.07	8.72
Am_Rn_000520	8805	XP_034899370.1_LOW QUALITY PROTEIN: uncharacterized protein LOC118037487 [Populus alba]	ATMG00860.1_DNA/RNA polymerases superfamily protein, GeneName=ORF158	IPR041373_Reverse transcriptase, RNase H-like domain; IPR041588_Integrase zinc-binding domain; IPR001584_Integrase, catalytic core; IPR043502_DNA/RNA polymerase superfamily; IPR012337_Ribonuclease H-like superfamily; IPR000477_Reverse transcriptase domain	1.07	1.41333	1.11	1.64333	1.44	1.15	0.62	0.79	2.15	1.3	0.49	1.64	1.2	1.5	1.74	1.69
Am_Rn_000521	8803	XP_027344030.1_alpha,alpha-trehalose-phosphate synthase [UDP-forming] 1 isoform X2 [Abrus precatorius]	AT1G78580.1_trehalose-6-phosphate synthase, GeneName=TPS1	IPR003337_Trehalose-phosphatase; IPR036412_HAD-like superfamily; IPR001830_Glycosyl transferase, family 20	7.83	6.99	4.48667	8.07667	10.79	8.85	3.85	6.86	7.31	6.8	1.83	6.84	4.79	6.16	9.19	8.88
Am_Rn_000522	8801	XP_004509455.1_glutamate receptor 3.6-like [Cicer arietinum] XP_004509456.1 glutamate receptor 3.6-like [Cicer arietinum]	AT3G51480.1_glutamate receptor 3.6, GeneName=GLR3.6	IPR017103_Ionotropic glutamate receptor, plant; IPR001638_Solute-binding protein family 3/N-terminal domain of MltF; IPR001828_Receptor, ligand binding region; IPR001320_Ionotropic glutamate receptor; IPR000337_GPCR, family 3; IPR028082_Periplasmic binding protein-like I	0.353333	0.316667	0.466667	0.366667	0.12	0.33	0.61	0.62	0.21	0.12	0.07	0.93	0.4	0.43	0.23	0.44
Am_Rn_000523	8799	XP_004495510.1_uncharacterized protein LOC101493187 [Cicer arietinum] XP_012569934.1 uncharacterized protein LOC101493187 [Cicer arietinum]	AT1G32810.2_RING/FYVE/PHD zinc finger superfamily protein	IPR011011_Zinc finger, FYVE/PHD-type; IPR001965_Zinc finger, PHD-type	0.533333	1.12333	0.586667	0.9	0.51	0.57	0.52	0.81	1.36	1.2	0.04	0.93	0.79	0.54	1.16	1
Am_Rn_000524	8794	TKY55886.1_coiled-coil domain-containing protein 73 [Spatholobus suberectus]	AT2G17990.1_polyamine-modulated factor 1-binding protein	.	3.05667	1.60333	2.31667	2.57	2.72	2.89	3.56	1.67	1.71	1.43	2.24	2.11	2.6	2.43	3.41	1.87
Am_Rn_000525	8793	XP_045817618.1_DExH-box ATP-dependent RNA helicase DExH7, chloroplastic-like isoform X3 [Trifolium pratense] XP_045817981.1 DExH-box ATP-dependent RNA helicase DExH7, chloroplastic-like isoform X3 [Trifolium pratense]	AT1G58060.1_RNA helicase family protein	IPR011545_DEAD/DEAH box helicase domain; IPR001650_Helicase, C-terminal; IPR027417_P-loop containing nucleoside triphosphate hydrolase; IPR011709_Domain of unknown function DUF1605; IPR014001_Helicase superfamily 1/2, ATP-binding domain; IPR007502_Helicase-associated domain	0.336667	0.18	0.46	0.27	0.41	0.35	0.25	0.25	0.07	0.22	0.22	0.64	0.52	0.26	0.28	0.27
Am_Rn_000526	8784	XP_012574126.2_LOW QUALITY PROTEIN: NAC domain-containing protein 69-like [Cicer arietinum]	AT4G35580.1_NAC transcription factor-like 9, GeneName=NTL9	IPR036093_NAC domain superfamily; IPR003441_NAC domain	2.82667	2.85333	1.65	10.33	0.62	4.49	3.37	4.08	0.75	3.73	1.17	1.62	2.16	16.33	2.99	11.67
Am_Rn_000527	8779	XP_004502032.1_nucleotide exchange factor SIL1 [Cicer arietinum]	AT3G51980.1_ARM repeat superfamily protein	IPR013918_Nucleotide exchange factor Fes1	0.72	2.31	1.33667	2.07333	1.12	0.59	0.45	2.1	2.53	2.3	0.61	1.76	1.64	1.74	2.06	2.42
Am_Rn_000528	8779	XP_027337093.1_uncharacterized protein LOC113850743 [Abrus precatorius]	.	IPR005162_Retrotransposon gag domain	1.05333	1.14	0.77	1.14333	1.65	0.82	0.69	0.98	1.38	1.06	0.44	0.93	0.94	0.92	1.47	1.04
Am_Rn_000529	8774	GAU18876.1_hypothetical protein TSUD_228660 [Trifolium subterraneum]	AT5G62180.1_carboxyesterase 20, GeneName=CXE20	IPR045358_Ty3 transposon capsid-like protein; IPR021109_Aspartic peptidase domain superfamily	2	2.96	0.95	4.64333	2.4	2.32	1.28	3.12	3.05	2.71	0.78	1.03	1.04	3.7	5.75	4.48
Am_Rn_000530	8760	XP_004492913.1_uncharacterized protein LOC101503595 [Cicer arietinum]	AT5G23520.1_smr (Small MutS Related) domain-containing protein	IPR002625_Smr domain; IPR036063_Smr domain superfamily; IPR013899_Domain of unknown function DUF1771	1.61667	0.136667	0	0.256667	4.85	0	0	0	0.41	0	0	0	0	0.38	0.39	0
Am_Rn_000531	8754	XP_027356341.1_zinc finger CCCH domain-containing protein 19 [Abrus precatorius]	AT2G16485.2_GW repeat- and PHD finger-containing protein NERD, GeneName=NERD	IPR011011_Zinc finger, FYVE/PHD-type; IPR004343_Plus-3 domain; IPR036885_SWIB/MDM2 domain superfamily; IPR019835_SWIB domain; IPR036128_Plus3-like superfamily; IPR001965_Zinc finger, PHD-type; IPR003121_SWIB/MDM2 domain	0	1.53667	0.04	1.02667	0	0	0	1.45	1.74	1.42	0	0	0.12	0.69	1.37	1.02
Am_Rn_000532	8752	XP_004510876.1_two-component response regulator ARR14 isoform X2 [Cicer arietinum]	.	.	0	5.66667	0.0966667	0.173333	0	0	0	5	6.09	5.91	0.23	0.06	0	0.32	0.07	0.13
Am_Rn_000533	8752	KYP42564.1_Retrovirus-related Pol polyprotein from transposon TNT 1-94 [Cajanus cajan]	AT4G23160.3_cysteine-rich RECEPTOR-like kinase, GeneName=CRK8	IPR012337_Ribonuclease H-like superfamily	2.86	2.05333	2.24333	1.52333	0.31	4.95	3.32	1.43	2.06	2.67	0.32	2.94	3.47	1.6	1.51	1.46
Am_Rn_000534	8746	XP_045806963.1_pre-mRNA-processing-splicing factor 8A isoform X1 [Trifolium pratense]	AT1G80070.1_Pre-mRNA-processing-splicing factor, GeneName=SUS2	IPR019581_Pre-mRNA-processing-splicing factor 8, U5-snRNA-binding; IPR012591_PRO8NT domain; IPR012592_PROCN domain; IPR019582_RNA recognition motif, spliceosomal PrP8; IPR012337_Ribonuclease H-like superfamily	0.186667	0	0.32	0.13	0.33	0	0.23	0	0	0	0	0.51	0.45	0.15	0	0.24
Am_Rn_000535	8736	XP_004501660.1_BEACH domain-containing protein B [Cicer arietinum]	AT1G58230.2_binding protein	IPR013320_Concanavalin A-like lectin/glucanase domain superfamily; IPR016024_Armadillo-type fold; IPR031570_Neurobeachin/BDCP, DUF4704	0.706667	0.17	0.143333	0.236667	0.94	0.27	0.91	0.23	0.22	0.06	0	0.23	0.2	0.1	0.4	0.21
Am_Rn_000536	8735	XP_004505180.1_kinesin-like protein KIN-12D isoform X1 [Cicer arietinum]	AT3G19050.1_phragmoplast orienting kinesin 2, GeneName=POK2	IPR027417_P-loop containing nucleoside triphosphate hydrolase; IPR001752_Kinesin motor domain	0.0133333	0.4	1.79	1.53667	0	0.02	0.02	0.36	0.58	0.26	1.33	1.66	2.38	1.12	0.75	2.74
Am_Rn_000537	8734	XP_004494344.1_uncharacterized protein LOC101503823 isoform X1 [Cicer arietinum] XP_004494345.1 uncharacterized protein LOC101503823 isoform X1 [Cicer arietinum] XP_004494346.1 uncharacterized protein LOC101503823 isoform X1 [Cicer arietinum] XP_012569589.1 uncharacterized protein LOC101503823 isoform X1 [Cicer arietinum]	AT3G62900.2_CW-type Zinc Finger	IPR011124_Zinc finger, CW-type	0.0166667	0.303333	0.45	0.45	0	0	0.05	0.37	0.43	0.11	0.08	0.99	0.28	0.15	1.01	0.19
Am_Rn_000538	8730	TKY53560.1_Nuclear pore complex protein NUP1 [Spatholobus suberectus]	AT3G10650.1_nuclear pore complex protein, GeneName=NUP1	.	0.04	0.0766667	0.226667	2.1	0.12	0	0	0	0	0.23	0.32	0.36	0	1.23	3.75	1.32
Am_Rn_000539	8729	PNX92266.1_retrotransposon-related protein [Trifolium pratense]	ATMG00860.1_DNA/RNA polymerases superfamily protein, GeneName=ORF158	IPR023780_Chromo domain; IPR041588_Integrase zinc-binding domain; IPR000477_Reverse transcriptase domain; IPR012337_Ribonuclease H-like superfamily; IPR016197_Chromo-like domain superfamily; IPR041577_Reverse transcriptase/retrotransposon-derived protein, RNase H-like domain; IPR043502_DNA/RNA polymerase superfamily	0.963333	3.69333	3.23333	2.69333	0.9	1.6	0.39	3.06	4.54	3.48	2.29	4.31	3.1	2.62	2.44	3.02
Am_Rn_000540	8727	GAU44417.1_hypothetical protein TSUD_100640 [Trifolium subterraneum]	AT4G23160.3_cysteine-rich RECEPTOR-like kinase, GeneName=CRK8	IPR036875_Zinc finger, CCHC-type superfamily; IPR012337_Ribonuclease H-like superfamily; IPR001584_Integrase, catalytic core; IPR013103_Reverse transcriptase, RNA-dependent DNA polymerase; IPR043502_DNA/RNA polymerase superfamily; IPR025724_GAG-pre-integrase domain; IPR001878_Zinc finger, CCHC-type	2.09	1.28	3.50333	2.73333	3.09	2.26	0.92	1.09	1.74	1.01	1.98	4.74	3.79	2.69	3.38	2.13
Am_Rn_000541	8726	XP_013467285.1_serine/threonine-protein kinase TIO [Medicago truncatula] KEH41322.1 Serine/Threonine kinase domain protein [Medicago truncatula] RHN78861.1 putative protein kinase ULK-Fused family [Medicago truncatula]	AT1G50240.2_kinase family with ARM repeat domain-containing protein, GeneName=FU	IPR000719_Protein kinase domain; IPR011009_Protein kinase-like domain superfamily	0.84	0.25	0.173333	0.483333	1.31	0.4	0.81	0.23	0.32	0.2	0.06	0.31	0.15	0.51	0.45	0.49
Am_Rn_000542	8721	KHN02071.1_Cytochrome P450 83B1 [Glycine soja]	AT4G31500.1_cytochrome P450, family 83, subfamily B, polypeptide 1, GeneName=CYP83B1	IPR002401_Cytochrome P450, E-class, group I; IPR001128_Cytochrome P450; IPR036396_Cytochrome P450 superfamily	1.24667	3.51667	0.883333	3.65333	1.93	1.43	0.38	7.25	3.16	0.14	0.49	2.16	0	6.44	4.35	0.17
Am_Rn_000543	8719	XP_045786320.1_wall-associated receptor kinase-like 14 [Trifolium pratense]	AT2G23450.1_Protein kinase superfamily protein	IPR001245_Serine-threonine/tyrosine-protein kinase, catalytic domain; IPR011009_Protein kinase-like domain superfamily; IPR000719_Protein kinase domain	1.22333	0.673333	0.293333	1.10333	1.98	1.52	0.17	0.73	0.59	0.7	0	0.24	0.64	0.59	1.08	1.64
Am_Rn_000544	8711	XP_027193445.1_probable serine/threonine protein kinase IREH1 isoform X3 [Cicer arietinum]	AT3G17850.1_Protein kinase superfamily protein	IPR011009_Protein kinase-like domain superfamily; IPR000719_Protein kinase domain	0.236667	0.173333	0.163333	0.08	0.32	0.07	0.32	0.13	0.17	0.22	0.17	0.24	0.08	0.15	0	0.09
Am_Rn_000545	8705	TKY47414.1_Protease Do 7 [Spatholobus suberectus]	AT3G03380.1_DegP protease 7, GeneName=DEG7	IPR036034_PDZ superfamily; IPR009003_Peptidase S1, PA clan; IPR001478_PDZ domain; IPR025926_PDZ-like domain; IPR041489_PDZ domain 6	0.103333	0.0633333	0.133333	0.17	0	0.16	0.15	0.11	0	0.08	0.13	0.27	0	0.04	0.03	0.44
Am_Rn_000546	8705	XP_024952509.1_histidine-containing phosphotransfer protein 1-like [Citrus sinensis]	.	.	0.126667	0.396667	0.323333	0.49	0.18	0.09	0.11	0.23	0.39	0.57	0.12	0.34	0.51	0.31	0.23	0.93
Am_Rn_000547	8703	PNX95999.1_UDP-glycosyltransferase 74B1-like protein [Trifolium pratense]	AT1G24100.1_UDP-glucosyl transferase 74B1, GeneName=UGT74B1	IPR001611_Leucine-rich repeat	0	0.123333	0.106667	0.0866667	0	0	0	0	0.08	0.29	0.15	0.17	0	0.18	0	0.08
Am_Rn_000548	8701	XP_027367010.1_probable UDP-N-acetylglucosamine--peptide N-acetylglucosaminyltransferase SEC isoform X1 [Abrus precatorius]	AT3G04240.2_Tetratricopeptide repeat (TPR)-like superfamily protein, GeneName=SEC	IPR029489_O-GlcNAc transferase, C-terminal; IPR011990_Tetratricopeptide-like helical domain superfamily	1.48	2.19667	2.60667	1.66667	1.14	0.94	2.36	3.33	1.91	1.35	4.37	1.89	1.56	2.51	1.53	0.96
Am_Rn_000549	8699	PNY10061.1_histone deacetylase 19-like protein, partial [Trifolium pratense]	AT4G38130.2_histone deacetylase 1, GeneName=HD1	IPR023801_Histone deacetylase domain; IPR003084_Histone deacetylase; IPR023696_Ureohydrolase domain superfamily	0.393333	0.866667	0.8	1.03	0.2	0.55	0.43	0.8	1.08	0.72	0.22	1.13	1.05	0.67	1.12	1.3
Am_Rn_000550	8699	RHN82321.1_putative RNA-directed DNA polymerase [Medicago truncatula]	AT4G23160.3_cysteine-rich RECEPTOR-like kinase, GeneName=CRK8	IPR001584_Integrase, catalytic core; IPR036875_Zinc finger, CCHC-type superfamily; IPR012337_Ribonuclease H-like superfamily; IPR001878_Zinc finger, CCHC-type; IPR025724_GAG-pre-integrase domain; IPR013103_Reverse transcriptase, RNA-dependent DNA polymerase; IPR043502_DNA/RNA polymerase superfamily	0.103333	0.0433333	0.653333	0.00666667	0.1	0	0.21	0	0	0.13	0.26	0.43	1.27	0	0.02	0
Am_Rn_000551	8695	XP_012574596.1_transcription initiation factor TFIID subunit 1 isoform X2 [Cicer arietinum]	AT1G32750.1_HAC13 protein (HAC13), GeneName=HAF01	IPR001487_Bromodomain; IPR036427_Bromodomain-like superfamily; IPR022591_Transcription initiation factor TFIID subunit 1, domain of unknown function	1.79333	1.03667	0.843333	0.783333	2.68	2.01	0.69	1.25	0.84	1.02	0.6	1.36	0.57	0.72	0.82	0.81
Am_Rn_000552	8692	XP_027362985.1_protein HUA2-LIKE 2-like isoform X1 [Abrus precatorius]	AT3G63070.1_Tudor/PWWP/MBT domain-containing protein	IPR000313_PWWP domain; IPR006569_CID domain	6.09	20.4167	6.43333	21.13	5.77	9.94	2.56	19.85	20.55	20.85	4.51	9.41	5.38	17.96	22.31	23.12
Am_Rn_000553	8676	PNX93462.1_histone deacetylase, partial [Trifolium pratense]	AT4G23160.3_cysteine-rich RECEPTOR-like kinase, GeneName=CRK8	IPR013103_Reverse transcriptase, RNA-dependent DNA polymerase; IPR012337_Ribonuclease H-like superfamily; IPR025724_GAG-pre-integrase domain; IPR043502_DNA/RNA polymerase superfamily	9.01667	9.41667	8.30333	13.0433	14.38	8	4.67	10.46	10.35	7.44	4.06	10.84	10.01	11.59	14.23	13.31
Am_Rn_000554	8675	XP_045824224.1_uncharacterized protein LOC123916741 [Trifolium pratense] PNX80886.1 hypothetical protein L195_g036898 [Trifolium pratense]	AT5G52010.1_C2H2-like zinc finger protein	IPR036236_Zinc finger C2H2 superfamily; IPR013087_Zinc finger C2H2-type	3.01667	3.65	5.63333	3.74	4.3	4.29	0.46	1.22	4.12	5.61	2.96	7.85	6.09	2.52	6.49	2.21
Am_Rn_000555	8672	XP_006591464.1_4-methyl-5-nitrocatechol 5-monooxygenase isoform X2 [Glycine max] XP_028197721.1 uncharacterized protein LOC114382473 isoform X1 [Glycine soja] KAH1160720.1 hypothetical protein GYH30_032145 [Glycine max] KAH1226865.1 putative polyketide hydroxylase [Glycine max] KRH31438.1 hypothetical protein GLYMA_11G248400v4 [Glycine max] RZB73303.1 putative polyketide hydroxylase isoform A [Gl…	AT1G24340.1_FAD/NAD(P)-binding oxidoreductase family protein, GeneName=EMB2421	IPR036188_FAD/NAD(P)-binding domain superfamily; IPR002938_FAD-binding domain	1.58	3.11667	2.95667	1.7	2.59	1.23	0.92	2.99	2.09	4.27	1.17	3.9	3.8	1.59	1.51	2
Am_Rn_000556	8671	ABD33309.1_Ribonuclease H [Medicago truncatula]	AT4G12010.1_Disease resistance protein (TIR-NBS-LRR class) family	IPR002182_NB-ARC; IPR003591_Leucine-rich repeat, typical subtype; IPR027417_P-loop containing nucleoside triphosphate hydrolase; IPR036390_Winged helix DNA-binding domain superfamily; IPR011713_Leucine-rich repeat 3	0	0.39	0.263333	0.32	0	0	0	0.19	0.45	0.53	0.17	0.22	0.4	0.24	0.21	0.51
Am_Rn_000557	8670	XP_027362985.1_protein HUA2-LIKE 2-like isoform X1 [Abrus precatorius]	AT3G63070.1_Tudor/PWWP/MBT domain-containing protein	IPR000313_PWWP domain; IPR006569_CID domain	0.286667	0.713333	0.0966667	0.746667	0.42	0	0.44	0.73	0.65	0.76	0	0.14	0.15	1.26	0.34	0.64
Am_Rn_000558	8669	XP_045806963.1_pre-mRNA-processing-splicing factor 8A isoform X1 [Trifolium pratense]	AT1G80070.1_Pre-mRNA-processing-splicing factor, GeneName=SUS2	IPR019581_Pre-mRNA-processing-splicing factor 8, U5-snRNA-binding; IPR012591_PRO8NT domain; IPR012592_PROCN domain; IPR019582_RNA recognition motif, spliceosomal PrP8; IPR012337_Ribonuclease H-like superfamily	0.05	0.313333	0.08	0.13	0	0.15	0	0.55	0.31	0.08	0.24	0	0	0	0.39	0
Am_Rn_000559	8668	PNX92571.1_histone deacetylase [Trifolium pratense]	AT4G23160.3_cysteine-rich RECEPTOR-like kinase, GeneName=CRK8	.	0.193333	1.21667	0.736667	1.02	0.12	0.34	0.12	1.35	1.24	1.06	0.47	0.83	0.91	0.86	0.89	1.31
Am_Rn_000560	8667	KEH17304.1_cytochrome O ubiquinol oxidase subunit I [Medicago truncatula]	ATMG01360.1_cytochrome oxidase, GeneName=COX1	.	7.49667	15.3567	11.4067	32.2867	4.79	14.94	2.76	12.4	16.24	17.43	4.37	14.32	15.53	33.3	26.42	37.14
Am_Rn_000561	8666	XP_004510481.1_linoleate 13S-lipoxygenase 3-1, chloroplastic [Cicer arietinum]	AT1G17420.1_lipoxygenase 3, GeneName=LOX3	IPR013819_Lipoxygenase, C-terminal; IPR036226_Lipoxigenase, C-terminal domain superfamily	1.85	0.98	0.403333	1.41	1.67	1.95	1.93	2.2	0.26	0.48	0.12	0.33	0.76	3.07	0.66	0.5
Am_Rn_000562	8666	XP_004499141.1_uncharacterized protein LOC101507508 [Cicer arietinum]	AT5G42950.1_GYF domain-containing protein	IPR003169_GYF domain; IPR035445_GYF-like domain superfamily	37.54	16.91	9.81	21.8533	25.41	43.32	43.89	18.43	16.69	15.61	6.46	12.14	10.83	24.18	15.8	25.58
Am_Rn_000563	8664	PNY09528.1_RNA-binding protein [Trifolium pratense]	AT2G41060.1_RNA-binding (RRM/RBD/RNP motifs) family protein	IPR000504_RNA recognition motif domain; IPR035979_RNA-binding domain superfamily	16.89	14.59	12.7667	21.6733	22.41	16.95	11.31	11.91	18.01	13.85	7.83	15.74	14.73	15.01	23.55	26.46
Am_Rn_000564	8664	RZB70463.1_Transposon Ty3-G Gag-Pol polyprotein [Glycine soja]	AT3G54720.1_Peptidase M28 family protein, GeneName=AMP1	IPR003137_PA domain; IPR007484_Peptidase M28	0.293333	0.376667	0.0433333	0.193333	0.49	0.11	0.28	0.16	0.58	0.39	0.02	0.11	0	0.06	0.16	0.36
Am_Rn_000565	8663	XP_003517639.1_receptor-like protein kinase HSL1 [Glycine max] XP_028226676.1 receptor-like protein kinase HSL1 [Glycine soja] KAH1161010.1 hypothetical protein GYH30_000076 [Glycine max] KAH1264088.1 Receptor-like protein kinase HSL1 [Glycine max] KRH74250.1 hypothetical protein GLYMA_01G007500v4 [Glycine max] RZC27852.1 Receptor-like protein kinase HSL1 [Glycine soja]	AT5G25930.1_kinase family with leucine-rich repeat domain-containing protein	IPR000719_Protein kinase domain; IPR001611_Leucine-rich repeat; IPR011009_Protein kinase-like domain superfamily; IPR003591_Leucine-rich repeat, typical subtype	1.54667	1.49667	0.86	2.17667	1.97	1	1.67	1.03	2.3	1.16	0.11	1.19	1.28	2.71	1.84	1.98
Am_Rn_000566	8661	KHN21230.1_Retrovirus-related Pol polyprotein from transposon TNT 1-94, partial [Glycine soja]	AT2G30800.1_helicase in vascular tissue and tapetum, GeneName=HVT1	IPR013103_Reverse transcriptase, RNA-dependent DNA polymerase; IPR025724_GAG-pre-integrase domain; IPR012337_Ribonuclease H-like superfamily; IPR043502_DNA/RNA polymerase superfamily; IPR001584_Integrase, catalytic core	0.146667	0.223333	0.0366667	0.236667	0	0.31	0.13	0.23	0	0.44	0	0	0.11	0	0.71	0
Am_Rn_000567	8659	KAH1088112.1_hypothetical protein GYH30_019248 [Glycine max]	AT4G23160.3_cysteine-rich RECEPTOR-like kinase, GeneName=CRK8	IPR025724_GAG-pre-integrase domain; IPR012337_Ribonuclease H-like superfamily	0.423333	1.01	0.74	0.883333	0.68	0.3	0.29	1.03	1.06	0.94	0.32	0.99	0.91	0.67	0.66	1.32
Am_Rn_000568	8657	XP_004511755.1_uncharacterized protein LOC101495071 [Cicer arietinum]	AT4G17140.3_pleckstrin homology (PH) domain-containing protein	IPR009291_Vacuolar protein sorting-associated protein 62; IPR001849_Pleckstrin homology domain; IPR031642_VPS13, repeated coiled region; IPR031646_Vacuolar protein sorting-associated protein 13, second N-terminal domain; IPR026854_Vacuolar protein sorting-associated protein 13-like, N-terminal domain	0	0.21	0.0633333	0.08	0	0	0	0.17	0.31	0.15	0.09	0.05	0.05	0.11	0.13	0
Am_Rn_000569	8655	XP_004502400.1_ATP-dependent RNA helicase DEAH11, chloroplastic [Cicer arietinum]	AT4G01020.1_helicase domain-containing protein / IBR domain-containing protein / zinc finger protein-like protein	IPR001650_Helicase, C-terminal; IPR011709_Domain of unknown function DUF1605; IPR007502_Helicase-associated domain; IPR027417_P-loop containing nucleoside triphosphate hydrolase; IPR011545_DEAD/DEAH box helicase domain; IPR014001_Helicase superfamily 1/2, ATP-binding domain	0.93	1.93	1.35667	2.28667	1.23	1.08	0.48	1.88	2.55	1.36	0.46	2.03	1.58	1.58	3.47	1.81
Am_Rn_000570	8649	XP_012569579.1_protein ILITYHIA [Cicer arietinum]	AT1G64790.3_ILITYHIA, GeneName=ILA	IPR016024_Armadillo-type fold; IPR034085_TOG domain	0.19	0	0.283333	0.12	0.29	0.28	0	0	0	0	0	0.28	0.57	0	0.36	0
Am_Rn_000571	8648	KHN21230.1_Retrovirus-related Pol polyprotein from transposon TNT 1-94, partial [Glycine soja]	AT4G23160.3_cysteine-rich RECEPTOR-like kinase, GeneName=CRK8	IPR001584_Integrase, catalytic core; IPR012337_Ribonuclease H-like superfamily; IPR025724_GAG-pre-integrase domain; IPR043502_DNA/RNA polymerase superfamily; IPR013103_Reverse transcriptase, RNA-dependent DNA polymerase	0	0.04	0.196667	0	0	0	0	0	0	0.12	0	0.14	0.45	0	0	0
Am_Rn_000572	8644	XP_004508738.2_protein MAIN-LIKE 1-like [Cicer arietinum]	.	.	0	0	0	0	0	0	0	0	0	0	0	0	0	0	0	0
Am_Rn_000573	8639	PNX95999.1_UDP-glycosyltransferase 74B1-like protein [Trifolium pratense]	AT1G24100.1_UDP-glucosyl transferase 74B1, GeneName=UGT74B1	IPR001611_Leucine-rich repeat	0	0	0	0	0	0	0	0	0	0	0	0	0	0	0	0
Am_Rn_000574	8637	XP_027366346.1_clathrin light chain 1-like [Abrus precatorius]	AT2G20760.1_Clathrin light chain protein	IPR019557_Aminotransferase-like, plant mobile domain	0.59	0.87	0.403333	0.583333	0.42	1	0.35	0.31	0.65	1.65	0	0.5	0.71	1.25	0.5	0
Am_Rn_000575	8637	XP_045820675.1_uncharacterized protein LOC123913842 [Trifolium pratense] XP_045820676.1 uncharacterized protein LOC123913842 [Trifolium pratense]	AT1G18270.2_ketose-bisphosphate aldolase class-II family protein	IPR008927_6-phosphogluconate dehydrogenase-like, C-terminal domain superfamily; IPR000771_Fructose-bisphosphate aldolase, class-II; IPR029154_3-hydroxyisobutyrate dehydrogenase, NAD-binding domain; IPR010737_Four-carbon acid sugar kinase, N-terminal domain; IPR031475_Four-carbon acid sugar kinase, nucleotide binding domain	0	0.536667	0.533333	0.386667	0	0	0	0.42	0.39	0.8	0	0.94	0.66	0	0.39	0.77
Am_Rn_000576	8633	KYP41234.1_Retrovirus-related Pol polyprotein from transposon TNT 1-94 [Cajanus cajan]	AT4G23160.3_cysteine-rich RECEPTOR-like kinase, GeneName=CRK8	IPR001584_Integrase, catalytic core; IPR025724_GAG-pre-integrase domain; IPR012337_Ribonuclease H-like superfamily	4.53333	4.36333	3.29667	5.80333	5.11	6.8	1.69	2.37	7.74	2.98	1.17	6.43	2.29	3.4	9.28	4.73
Am_Rn_000577	8629	BAG72148.1_hypothetical protein [Lotus japonicus] BAG72153.1 hypothetical protein [Lotus japonicus]	AT2G27100.1_C2H2 zinc-finger protein SERRATE (SE), GeneName=SE	IPR007042_SERRATE/Ars2 , C-terminal; IPR021933_SERRATE/Ars2, N-terminal	0.01	0.416667	0.526667	0.426667	0	0.03	0	0.29	0.85	0.11	0.47	0.87	0.24	0.43	0.73	0.12
Am_Rn_000578	8620	XP_012569579.1_protein ILITYHIA [Cicer arietinum]	AT1G64790.3_ILITYHIA, GeneName=ILA	IPR016024_Armadillo-type fold; IPR034085_TOG domain	0.07	0.173333	0.0833333	0.08	0	0	0.21	0	0.29	0.23	0	0	0.25	0	0.24	0
Am_Rn_000579	8617	XP_027347752.1_protein E6-like [Abrus precatorius]	AT2G33850.1_E6-like protein	.	0.286667	1.30667	1.67333	1.57667	0.12	0.35	0.39	0.88	1.73	1.31	1.42	1.97	1.63	0.7	2.46	1.57
Am_Rn_000580	8613	TKY73618.1_Transcription factor GTE10 [Spatholobus suberectus]	AT1G50730.2_hypothetical protein	IPR036427_Bromodomain-like superfamily; IPR027353_NET domain; IPR001487_Bromodomain	0.14	0.333333	0.163333	0.353333	0.1	0.17	0.15	0.35	0.33	0.32	0	0.27	0.22	0.79	0	0.27
Am_Rn_000581	8613	RZC09450.1_Retrovirus-related Pol polyprotein from transposon TNT 1-94 [Glycine soja]	AT4G23160.3_cysteine-rich RECEPTOR-like kinase, GeneName=CRK8	IPR013103_Reverse transcriptase, RNA-dependent DNA polymerase; IPR043502_DNA/RNA polymerase superfamily	0	0.856667	0	0	0	0	0	1.11	0.59	0.87	0	0	0	0	0	0
Am_Rn_000582	8609	XP_004497763.1_protein BLISTER [Cicer arietinum]	AT3G23980.1_BLISTER, GeneName=BLI	.	0.26	0.566667	0.293333	0.236667	0.23	0.37	0.18	0.64	0.35	0.71	0.23	0.37	0.28	0.54	0.17	0
Am_Rn_000583	8609	KHN21230.1_Retrovirus-related Pol polyprotein from transposon TNT 1-94, partial [Glycine soja]	AT5G49430.1_WD40/YVTN repeat and Bromo-WDR9-I-like domain-containing protein	IPR001584_Integrase, catalytic core; IPR025724_GAG-pre-integrase domain; IPR043502_DNA/RNA polymerase superfamily; IPR013103_Reverse transcriptase, RNA-dependent DNA polymerase; IPR012337_Ribonuclease H-like superfamily	0.41	0.72	0.683333	0.973333	0.3	0.59	0.34	1.59	0	0.57	0.27	1.08	0.7	1.42	0.55	0.95
Am_Rn_000584	8606	XP_045792033.1_uncharacterized protein LOC123886792 [Trifolium pratense]	AT5G20890.1_TCP-1/cpn60 chaperonin family protein	.	0.616667	0.0466667	0.0133333	0.11	1.27	0.25	0.33	0	0.05	0.09	0	0	0.04	0	0.14	0.19
Am_Rn_000585	8604	XP_045818083.1_protein PIGMENT DEFECTIVE 338, chloroplastic-like [Trifolium pratense]	AT1G71720.1_Nucleic acid-binding proteins superfamily, GeneName=PDE338	IPR012340_Nucleic acid-binding, OB-fold; IPR022967_RNA-binding domain, S1; IPR003029_S1 domain	0	0.0966667	0.04	0.0633333	0	0	0	0	0	0.29	0	0	0.12	0	0	0.19
Am_Rn_000586	8602	XP_025678867.1_uncharacterized protein LOC112778796 [Arachis hypogaea]	AT4G29090.1_Ribonuclease H-like superfamily protein	IPR026960_Reverse transcriptase zinc-binding domain; IPR002156_Ribonuclease H domain; IPR000477_Reverse transcriptase domain; IPR043502_DNA/RNA polymerase superfamily; IPR012337_Ribonuclease H-like superfamily; IPR036691_Endonuclease/exonuclease/phosphatase superfamily	0.37	1.65	1.53	1.16	0.66	0.3	0.15	1.13	1.85	1.97	1.42	1.64	1.53	1.07	1.05	1.36
Am_Rn_000587	8601	KAG4995227.1_hypothetical protein JHK86_032054 [Glycine max] KAG5125220.1 hypothetical protein JHK82_031957 [Glycine max] KAG5146645.1 hypothetical protein JHK84_032188 [Glycine max]	.	.	1.03	1.04	0.89	0.623333	1.41	0	1.68	1.47	0	1.65	0.79	0	1.88	0.71	0.03	1.13
Am_Rn_000588	8598	PNY13038.1_telomere-associated protein RIF1 [Trifolium pratense]	AT2G42230.1_C-CAP/cofactor C-like domain-containing protein	.	0.41	0.0933333	0	0.04	0.75	0.48	0	0	0	0.28	0	0	0	0	0	0.12
Am_Rn_000589	8585	KAG4930220.1_hypothetical protein JHK86_047181 [Glycine max] KAG4943111.1 hypothetical protein JHK85_047757 [Glycine max] KAG5102221.1 hypothetical protein JHK84_047190 [Glycine max]	AT2G26890.1_DNAJ heat shock N-terminal domain-containing protein, GeneName=GRV2	IPR016024_Armadillo-type fold; IPR001623_DnaJ domain; IPR045802_DnaJ homologue subfamily C, GRV2/DNAJC13, N-terminal domain; IPR036869_Chaperone J-domain superfamily; IPR025640_GYF domain 2	24.38	26.2467	20.2833	30.9867	29.1	26.75	17.29	25.43	27.85	25.46	10.26	25.79	24.8	25.07	31.2	36.69
Am_Rn_000590	8584	KHN21230.1_Retrovirus-related Pol polyprotein from transposon TNT 1-94, partial [Glycine soja]	AT2G30800.1_helicase in vascular tissue and tapetum, GeneName=HVT1	IPR013103_Reverse transcriptase, RNA-dependent DNA polymerase; IPR025724_GAG-pre-integrase domain; IPR012337_Ribonuclease H-like superfamily; IPR043502_DNA/RNA polymerase superfamily; IPR001584_Integrase, catalytic core	0	0.176667	0.143333	0.07	0	0	0	0	0.53	0	0	0.43	0	0	0	0.21
Am_Rn_000591	8583	KYP54028.1_Retrovirus-related Pol polyprotein LINE-1 [Cajanus cajan]	AT3G24255.5_RNA-directed DNA polymerase (reverse transcriptase)-related family protein	IPR012340_Nucleic acid-binding, OB-fold; IPR003871_Domain of unknown function DUF223	0.726667	0.216667	0.176667	0.64	1.05	0.71	0.42	0.37	0.15	0.13	0.15	0.24	0.14	1.02	0.6	0.3
Am_Rn_000592	8582	XP_004504350.1_uncharacterized protein LOC101515132 [Cicer arietinum]	AT4G13750.1_Histidine kinase-, DNA gyrase B-, and HSP90-like ATPase family protein, GeneName=NOV	IPR036890_Histidine kinase/HSP90-like ATPase superfamily; IPR024975_Protein NO VEIN, C-terminal	11.7567	6.06333	4.68333	6.09333	13.55	8.56	13.16	5.91	6.36	5.92	1.77	6.49	5.79	5.11	6.3	6.87
Am_Rn_000593	8580	XP_045810998.1_nuclear exosome regulator NRDE2 isoform X4 [Trifolium pratense]	AT3G17740.1_hypothetical protein	IPR013633_siRNA-mediated silencing protein NRDE-2	2.63	2.50333	2.62333	1.16667	2.41	3.41	2.07	4.23	1.56	1.72	1.72	2.89	3.26	0	0.46	3.04
Am_Rn_000594	8580	BAG72151.1_hypothetical protein [Lotus japonicus]	ATMG00860.1_DNA/RNA polymerases superfamily protein, GeneName=ORF158	IPR043502_DNA/RNA polymerase superfamily; IPR041577_Reverse transcriptase/retrotransposon-derived protein, RNase H-like domain; IPR000477_Reverse transcriptase domain	0.413333	1.32333	0.84	1.04333	0.41	0.62	0.21	1.3	1.52	1.15	0.37	1.01	1.14	0.74	1.24	1.15
Am_Rn_000595	8579	XP_012569146.1_sister chromatid cohesion 1 protein 4 isoform X1 [Cicer arietinum]	AT5G16270.1_sister chromatid cohesion 1 protein 4, GeneName=SYN4	IPR006910_Rad21/Rec8-like protein, N-terminal	1.1	1.33	1.19	0.793333	0.57	0.75	1.98	1.4	1.64	0.95	0.28	1.62	1.67	0.71	0.76	0.91
Am_Rn_000596	8579	XP_027187628.1_uncharacterized protein LOC101494533 [Cicer arietinum]	AT5G36930.3_Disease resistance protein (TIR-NBS-LRR class) family	IPR000157_Toll/interleukin-1 receptor homology (TIR) domain; IPR002182_NB-ARC; IPR027417_P-loop containing nucleoside triphosphate hydrolase; IPR035897_Toll/interleukin-1 receptor homology (TIR) domain superfamily	0.846667	2.66333	1.36	1.87333	0.92	0.9	0.72	1.08	4.28	2.63	0.76	1.71	1.61	1.13	3.08	1.41
Am_Rn_000597	8578	XP_020216415.1_puromycin-sensitive aminopeptidase isoform X3 [Cajanus cajan] XP_020216416.1 puromycin-sensitive aminopeptidase isoform X3 [Cajanus cajan] XP_029127384.1 puromycin-sensitive aminopeptidase isoform X3 [Cajanus cajan] XP_029127385.1 puromycin-sensitive aminopeptidase isoform X3 [Cajanus cajan]	AT1G63770.7_Peptidase M1 family protein	IPR024601_Peptidase M1, alanyl aminopeptidase, C-terminal; IPR035414_Peptidase M1, alanyl aminopeptidase, Ig-like fold; IPR014782_Peptidase M1, membrane alanine aminopeptidase	0.0933333	0.12	0.02	0.0866667	0.11	0.07	0.1	0.18	0.08	0.1	0	0.03	0.03	0.2	0.06	0
Am_Rn_000598	8577	XP_026282439.1_uncharacterized protein LOC113209233 [Frankliniella occidentalis]	AT4G23160.3_cysteine-rich RECEPTOR-like kinase, GeneName=CRK8	IPR013103_Reverse transcriptase, RNA-dependent DNA polymerase; IPR043502_DNA/RNA polymerase superfamily; IPR001584_Integrase, catalytic core; IPR012337_Ribonuclease H-like superfamily	0	0.0366667	1.05	0	0	0	0	0	0.07	0.04	2.32	0.57	0.26	0	0	0
Am_Rn_000599	8576	XP_045824196.1_beta-fructofuranosidase, insoluble isoenzyme CWINV6 isoform X1 [Trifolium pratense]	AT5G52010.1_C2H2-like zinc finger protein	IPR036236_Zinc finger C2H2 superfamily; IPR013087_Zinc finger C2H2-type	1.28333	6.13667	4.42667	0.65	0.05	2.71	1.09	8.27	6.67	3.47	2.8	5.29	5.19	1.54	0.41	0
Am_Rn_000600	8570	GAU13153.1_hypothetical protein TSUD_112140, partial [Trifolium subterraneum]	AT4G30720.1_FAD/NAD(P)-binding oxidoreductase family protein, GeneName=PDE327	IPR000477_Reverse transcriptase domain; IPR043502_DNA/RNA polymerase superfamily	0.153333	0.74	0.526667	0.523333	0.14	0.21	0.11	1.01	0.52	0.69	0.37	0.64	0.57	0.55	0.43	0.59
Am_Rn_000601	8567	XP_004500060.1_uncharacterized protein LOC101509310 isoform X2 [Cicer arietinum]	AT1G50660.1_actin cytoskeleton-regulatory complex pan-like protein	.	0.743333	1.7	0.543333	1.29	0.69	1.22	0.32	1.15	2.49	1.46	0.16	0.92	0.55	0.97	1.65	1.25
Am_Rn_000602	8567	KHN21230.1_Retrovirus-related Pol polyprotein from transposon TNT 1-94, partial [Glycine soja]	AT4G23160.3_cysteine-rich RECEPTOR-like kinase, GeneName=CRK8	IPR013103_Reverse transcriptase, RNA-dependent DNA polymerase; IPR043502_DNA/RNA polymerase superfamily	0.396667	0.45	0.54	0.883333	0.6	0.48	0.11	0.64	0.52	0.19	0.21	0.66	0.75	0.55	1.07	1.03
Am_Rn_000603	8565	XP_004501262.1_uncharacterized protein LOC101502765 isoform X1 [Cicer arietinum] XP_027190322.1 uncharacterized protein LOC101502765 isoform X2 [Cicer arietinum]	AT2G25730.3_zinc finger FYVE domain protein	.	0.146667	0.903333	0.3	0.563333	0	0.23	0.21	0.7	0.74	1.27	0	0.9	0	0.53	0	1.16
Am_Rn_000604	8559	XP_027339210.1_cyclic nucleotide-gated ion channel 17 isoform X3 [Abrus precatorius]	AT4G30360.1_cyclic nucleotide-gated channel 17, GeneName=CNGC17	IPR018490_Cyclic nucleotide-binding-like; IPR000595_Cyclic nucleotide-binding domain	0.99	2.57333	1.95667	3.05	0.84	1.53	0.6	2.42	2.56	2.74	0.73	2.68	2.46	1.84	3.6	3.71
Am_Rn_000605	8559	XP_039688839.1_1-phosphatidylinositol-3-phosphate 5-kinase FAB1B isoform X1 [Medicago truncatula]	AT4G33240.4_1-phosphatidylinositol-3-phosphate 5-kinase FAB1A, GeneName=FAB1A	IPR011011_Zinc finger, FYVE/PHD-type; IPR000306_FYVE zinc finger; IPR027409_GroEL-like apical domain superfamily; IPR002423_Chaperonin Cpn60/GroEL/TCP-1 family	0.296667	0.366667	0.146667	0.286667	0.49	0.23	0.17	0.56	0.22	0.32	0.14	0.12	0.18	0.19	0.28	0.39
Am_Rn_000606	8554	XP_027334669.1_NAC domain-containing protein 89-like [Abrus precatorius]	AT4G01550.1_NAC domain containing protein 69, GeneName=NAC069	IPR036093_NAC domain superfamily; IPR003441_NAC domain	0.713333	0.383333	0.583333	0.36	0.14	1.37	0.63	0.27	0.58	0.3	0.23	0.47	1.05	0.44	0.43	0.21
Am_Rn_000607	8550	XP_004496487.1_serine/threonine-protein kinase STY46-like isoform X2 [Cicer arietinum] XP_004496488.1 serine/threonine-protein kinase STY46-like isoform X2 [Cicer arietinum]	AT4G38470.1_ACT-like protein tyrosine kinase family protein, GeneName=STY46	IPR021109_Aspartic peptidase domain superfamily; IPR000477_Reverse transcriptase domain; IPR043502_DNA/RNA polymerase superfamily	0.103333	0.216667	0.0333333	0	0.03	0.08	0.2	0.07	0.41	0.17	0	0.1	0	0	0	0
Am_Rn_000608	8548	KEH30855.1_P-loop nucleoside triphosphate hydrolase superfamily protein [Medicago truncatula]	AT2G01460.3_P-loop containing nucleoside triphosphate hydrolases superfamily protein	.	1.08667	1.23667	0.17	0.133333	1.3	1.45	0.51	1.84	1.06	0.81	0.13	0.18	0.2	0.16	0.15	0.09
Am_Rn_000609	8547	RHN62961.1_putative nucleotidyltransferase, Ribonuclease H [Medicago truncatula]	AT3G09010.1_Protein kinase superfamily protein	IPR041373_Reverse transcriptase, RNase H-like domain; IPR043502_DNA/RNA polymerase superfamily; IPR012337_Ribonuclease H-like superfamily; IPR041588_Integrase zinc-binding domain	0.323333	0.00666667	0	0.236667	0.4	0.45	0.12	0	0	0.02	0	0	0	0.11	0.13	0.47
Am_Rn_000610	8546	XP_012569579.1_protein ILITYHIA [Cicer arietinum]	AT1G64790.3_ILITYHIA, GeneName=ILA	IPR016024_Armadillo-type fold; IPR034085_TOG domain	29.5533	30.3167	21.1867	46.6267	31.95	40.21	16.5	27.34	35.91	27.7	14.34	26.17	23.05	36.68	42.94	60.26
Am_Rn_000611	8543	XP_023874613.1_uncharacterized protein LOC111987139 [Quercus suber]	ATMG00750.1_GAG/POL/ENV polyprotein, GeneName=ORF119	IPR041588_Integrase zinc-binding domain; IPR001584_Integrase, catalytic core; IPR012337_Ribonuclease H-like superfamily; IPR000477_Reverse transcriptase domain; IPR041373_Reverse transcriptase, RNase H-like domain; IPR005162_Retrotransposon gag domain; IPR043502_DNA/RNA polymerase superfamily	0.686667	0.273333	0.766667	0.55	0.64	0.49	0.93	0	0.58	0.24	0.32	0.82	1.16	0.29	0.65	0.71
Am_Rn_000612	8541	PNX93462.1_histone deacetylase, partial [Trifolium pratense]	AT4G23160.3_cysteine-rich RECEPTOR-like kinase, GeneName=CRK8	IPR013103_Reverse transcriptase, RNA-dependent DNA polymerase; IPR012337_Ribonuclease H-like superfamily; IPR025724_GAG-pre-integrase domain; IPR043502_DNA/RNA polymerase superfamily	1.13667	0.82	0.976667	1.00667	1.58	0.59	1.24	0.72	0.35	1.39	1.49	0.82	0.62	0.55	0.91	1.56
Am_Rn_000613	8539	TKY61766.1_Histone-lysine N-methyltransferase ATX3 [Spatholobus suberectus]	AT3G61740.2_SET domain protein 14, GeneName=SDG14	IPR019787_Zinc finger, PHD-finger; IPR011011_Zinc finger, FYVE/PHD-type; IPR001965_Zinc finger, PHD-type	0.156667	0.0366667	0	0.246667	0	0.29	0.18	0	0	0.11	0	0	0	0	0	0.74
Am_Rn_000614	8535	PIN22518.1_DNA-directed DNA polymerase [Handroanthus impetiginosus]	ATMG00860.1_DNA/RNA polymerases superfamily protein, GeneName=ORF158	IPR041577_Reverse transcriptase/retrotransposon-derived protein, RNase H-like domain; IPR043502_DNA/RNA polymerase superfamily	0.1	1.76667	0.04	0.383333	0.07	0.2	0.03	1.34	2.08	1.88	0	0.06	0.06	0.56	0.1	0.49
Am_Rn_000615	8530	KHN21230.1_Retrovirus-related Pol polyprotein from transposon TNT 1-94, partial [Glycine soja]	AT4G23160.3_cysteine-rich RECEPTOR-like kinase, GeneName=CRK8	IPR001584_Integrase, catalytic core; IPR012337_Ribonuclease H-like superfamily; IPR025724_GAG-pre-integrase domain; IPR043502_DNA/RNA polymerase superfamily; IPR013103_Reverse transcriptase, RNA-dependent DNA polymerase	16.12	24.52	25.9633	18.48	8.72	26.39	13.25	23.25	26.78	23.53	16.09	31.16	30.64	19.34	19.87	16.23
Am_Rn_000616	8528	RDX84507.1_ATPase family AAA domain-containing protein 1, partial [Mucuna pruriens]	AT4G02480.1_AAA-type ATPase family protein	IPR041577_Reverse transcriptase/retrotransposon-derived protein, RNase H-like domain; IPR043502_DNA/RNA polymerase superfamily; IPR012337_Ribonuclease H-like superfamily; IPR000477_Reverse transcriptase domain; IPR041588_Integrase zinc-binding domain; IPR016197_Chromo-like domain superfamily; IPR023780_Chromo domain; IPR021109_Aspartic peptidase domain superfamily	1.34	1.20333	1.36	1.18	0.45	1.23	2.34	0.95	1.09	1.57	0.25	2.23	1.6	0.64	0.68	2.22
Am_Rn_000617	8528	AZI15359.1_K transporter protein, partial [Vitis vinifera] CBI27929.3 unnamed protein product, partial [Vitis vinifera]	AT2G19600.1_K+ efflux antiporter 4, GeneName=KEA4	IPR006153_Cation/H+ exchanger	0.163333	0.486667	0.0966667	0.863333	0.28	0.21	0	0.33	0.57	0.56	0	0	0.29	0.99	0.91	0.69
Am_Rn_000618	8525	XP_027362707.1_DNA (cytosine-5)-methyltransferase CMT3 [Abrus precatorius]	AT1G80740.1_chromomethylase 1, GeneName=CMT1	IPR029063_S-adenosyl-L-methionine-dependent methyltransferase; IPR023780_Chromo domain; IPR001525_C-5 cytosine methyltransferase; IPR016197_Chromo-like domain superfamily; IPR000953_Chromo/chromo shadow domain	1.43667	0.65	2.44667	1.01	1	0.2	3.11	0.31	1	0.64	3.09	2.39	1.86	0.44	0.57	2.02
Am_Rn_000619	8520	XP_014622155.1_uncharacterized protein LOC100818989 [Glycine max]	AT1G50830.1_Aminotransferase-like, plant mobile domain family protein	IPR012337_Ribonuclease H-like superfamily; IPR041373_Reverse transcriptase, RNase H-like domain; IPR041588_Integrase zinc-binding domain; IPR002156_Ribonuclease H domain; IPR043502_DNA/RNA polymerase superfamily	0.32	0.5	0.136667	2.87	0.16	0.53	0.27	0.26	1.11	0.13	0.1	0.25	0.06	1.44	4.95	2.22
Am_Rn_000620	8514	KHN21230.1_Retrovirus-related Pol polyprotein from transposon TNT 1-94, partial [Glycine soja]	AT4G23160.3_cysteine-rich RECEPTOR-like kinase, GeneName=CRK8	IPR012337_Ribonuclease H-like superfamily; IPR043502_DNA/RNA polymerase superfamily; IPR001584_Integrase, catalytic core; IPR013103_Reverse transcriptase, RNA-dependent DNA polymerase	0.13	0.92	0.19	0.68	0.26	0.13	0	0.68	1.3	0.78	0	0.34	0.23	0.39	1.02	0.63
Am_Rn_000621	8509	XP_045820675.1_uncharacterized protein LOC123913842 [Trifolium pratense] XP_045820676.1 uncharacterized protein LOC123913842 [Trifolium pratense]	AT1G18270.2_ketose-bisphosphate aldolase class-II family protein	IPR008927_6-phosphogluconate dehydrogenase-like, C-terminal domain superfamily; IPR000771_Fructose-bisphosphate aldolase, class-II; IPR029154_3-hydroxyisobutyrate dehydrogenase, NAD-binding domain; IPR010737_Four-carbon acid sugar kinase, N-terminal domain; IPR031475_Four-carbon acid sugar kinase, nucleotide binding domain	0.713333	0.46	0.12	0.483333	0.27	0.72	1.15	0.74	0.62	0.02	0.36	0	0	0.81	0.64	0
Am_Rn_000622	8508	XP_012573521.1_dicer-like protein 4 isoform X5 [Cicer arietinum]	AT5G20320.1_dicer-like 4, GeneName=DCL4	IPR014001_Helicase superfamily 1/2, ATP-binding domain; IPR001650_Helicase, C-terminal; IPR027417_P-loop containing nucleoside triphosphate hydrolase; IPR006935_Helicase/UvrB, N-terminal	6.26667	1.02333	0.983333	1.68	5.41	9.08	4.31	0.3	1.16	1.61	0.2	0.94	1.81	1.14	1.43	2.47
Am_Rn_000623	8505	TKY67847.1_EXPORTIN 1A [Spatholobus suberectus]	AT5G17020.1_exportin 1A, GeneName=XPO1A	IPR041123_Chromosome region maintenance repeat; IPR040485_Exportin-1, repeat 3; IPR014877_Exportin-1, C-terminal; IPR016024_Armadillo-type fold; IPR041235_Exportin-1, repeat 2; IPR013598_Exportin-1/Importin-beta-like; IPR001494_Importin-beta, N-terminal domain	1.05	2.95	2.98667	3.24	1.02	1.45	0.68	2.2	3.68	2.97	2.44	3.16	3.36	3	4.04	2.68
Am_Rn_000624	8505	XP_004514270.1_chromatin modification-related protein EAF1 B-like isoform X2 [Cicer arietinum]	AT3G24880.2_Helicase/SANT-associated, DNA binding protein	IPR014012_Helicase/SANT-associated domain; IPR009057_Homeobox-like domain superfamily; IPR001005_SANT/Myb domain	0.16	1.04667	0.766667	0.683333	0.06	0.36	0.06	0.91	1.1	1.13	0.56	0.75	0.99	0.71	0.59	0.75
Am_Rn_000625	8505	XP_020239124.1_CLIP-associated protein [Cajanus cajan]	AT2G20190.1_CLIP-associated protein, GeneName=CLASP	IPR024395_CLASP N-terminal domain; IPR034085_TOG domain; IPR000357_HEAT repeat; IPR016024_Armadillo-type fold	0.08	0.53	0.686667	0.65	0.04	0.12	0.08	0.69	0.63	0.27	0.4	1.09	0.57	0.75	0.41	0.79
Am_Rn_000626	8504	TKY63773.1_BEACH domain-containing protein lvsC [Spatholobus suberectus]	AT2G45540.1_WD-40 repeat family protein / beige-like protein	IPR001680_WD40 repeat; IPR036322_WD40-repeat-containing domain superfamily; IPR036372_BEACH domain superfamily; IPR000409_BEACH domain	0.846667	0.763333	0.693333	0.9	0.57	1.02	0.95	0.97	0.6	0.72	0.42	0.52	1.14	0.78	0.93	0.99
Am_Rn_000627	8502	BAG72150.1_hypothetical protein [Lotus japonicus]	AT5G61380.1_CCT motif -containing response regulator protein, GeneName=TOC1	IPR000477_Reverse transcriptase domain; IPR041577_Reverse transcriptase/retrotransposon-derived protein, RNase H-like domain; IPR021109_Aspartic peptidase domain superfamily; IPR043502_DNA/RNA polymerase superfamily	1.30333	1.41	1.32667	1.13667	2.44	0.8	0.67	1.08	1.43	1.72	0.39	1.82	1.77	0.85	1.24	1.32
Am_Rn_000628	8501	XP_045820380.1_uncharacterized protein LOC123913619 [Trifolium pratense]	.	IPR000477_Reverse transcriptase domain; IPR012337_Ribonuclease H-like superfamily; IPR041577_Reverse transcriptase/retrotransposon-derived protein, RNase H-like domain; IPR002156_Ribonuclease H domain; IPR043502_DNA/RNA polymerase superfamily	0.236667	0.23	0.183333	0.513333	0.66	0	0.05	0.57	0	0.12	0.19	0	0.36	1.31	0	0.23
Am_Rn_000629	8499	PNY15776.1_ribonuclease H [Trifolium pratense]	AT3G24255.5_RNA-directed DNA polymerase (reverse transcriptase)-related family protein	IPR005135_Endonuclease/exonuclease/phosphatase; IPR036691_Endonuclease/exonuclease/phosphatase superfamily; IPR000477_Reverse transcriptase domain; IPR043502_DNA/RNA polymerase superfamily; IPR026960_Reverse transcriptase zinc-binding domain	0.61	1.12	0.386667	1.08667	1.28	0.48	0.07	1.75	0.9	0.71	0.31	0.44	0.41	1.53	0.93	0.8
Am_Rn_000630	8481	XP_004492708.1_K(+) efflux antiporter 2, chloroplastic-like [Cicer arietinum]	AT4G00630.1_K+ efflux antiporter 2, GeneName=KEA2	IPR006153_Cation/H+ exchanger; IPR004771_K+/H+ exchanger	0.126667	2.96	0.73	0.913333	0.1	0.08	0.2	4.56	2.46	1.86	0.39	0.81	0.99	1.22	1.04	0.48
Am_Rn_000631	8480	GAU10453.1_hypothetical protein TSUD_419230, partial [Trifolium subterraneum]	.	IPR000477_Reverse transcriptase domain	0.72	0.626667	0.156667	0.0633333	1.11	0.18	0.87	0.99	0.49	0.4	0.11	0.23	0.13	0.06	0.03	0.1
Am_Rn_000632	8475	XP_003524102.1_berberine bridge enzyme-like 21 [Glycine max] KRH58395.1 hypothetical protein GLYMA_05G125600v4 [Glycine max]	AT4G20840.1_FAD-binding Berberine family protein	IPR006094_FAD linked oxidase, N-terminal; IPR036318_FAD-binding, type PCMH-like superfamily; IPR012951_Berberine/berberine-like	0.986667	3.46333	2.31	0.976667	1.16	1.72	0.08	2.48	2.64	5.27	0	1.49	5.44	0.52	2.41	0
Am_Rn_000633	8474	XP_034687654.1_G-type lectin S-receptor-like serine/threonine-protein kinase LECRK3 [Vitis riparia]	AT5G19180.1_E1 C-terminal related 1, GeneName=ECR1	IPR001480_Bulb-type lectin domain; IPR024171_S-receptor-like serine/threonine-protein kinase; IPR000719_Protein kinase domain; IPR036426_Bulb-type lectin domain superfamily; IPR011009_Protein kinase-like domain superfamily	0.29	0	0	0	0.17	0.7	0	0	0	0	0	0	0	0	0	0
Am_Rn_000634	8470	RZC09450.1_Retrovirus-related Pol polyprotein from transposon TNT 1-94 [Glycine soja]	AT4G23160.3_cysteine-rich RECEPTOR-like kinase, GeneName=CRK8	IPR013103_Reverse transcriptase, RNA-dependent DNA polymerase; IPR043502_DNA/RNA polymerase superfamily	0.503333	0.983333	0.79	0.676667	0.49	0.65	0.37	1.13	0.78	1.04	0.2	1.17	1	0.61	0.76	0.66
Am_Rn_000635	8468	RYQ85777.1_hypothetical protein Ahy_B10g105382 isoform B [Arachis hypogaea]	ATMG00860.1_DNA/RNA polymerases superfamily protein, GeneName=ORF158	IPR004312_Arabidopsis retrotransposon Orf1	0.6	0.193333	0.53	0.59	1	0.19	0.61	0.2	0.15	0.23	0.65	0.17	0.77	0.83	0.47	0.47
Am_Rn_000636	8467	XP_027342738.1_LEAF RUST 10 DISEASE-RESISTANCE LOCUS RECEPTOR-LIKE PROTEIN KINASE-like 2.1 isoform X1 [Abrus precatorius]	AT5G38260.1_Protein kinase superfamily protein	IPR032872_Wall-associated receptor kinase, C-terminal; IPR011009_Protein kinase-like domain superfamily; IPR025287_Wall-associated receptor kinase, galacturonan-binding domain; IPR000719_Protein kinase domain	0.373333	0.306667	0	0.63	0.37	0.52	0.23	0.77	0.15	0	0	0	0	1.73	0.16	0
Am_Rn_000637	8465	XP_004487236.1_pre-mRNA-splicing factor ATP-dependent RNA helicase DEAH7 [Cicer arietinum]	AT5G13010.1_RNA helicase family protein, GeneName=EMB3011	IPR007502_Helicase-associated domain; IPR001650_Helicase, C-terminal; IPR011545_DEAD/DEAH box helicase domain; IPR011709_Domain of unknown function DUF1605; IPR027417_P-loop containing nucleoside triphosphate hydrolase; IPR014001_Helicase superfamily 1/2, ATP-binding domain	1.98333	2.13333	1.25	1.64333	2.45	2.3	1.2	1.7	2.43	2.27	0.54	1.35	1.86	1.07	2.1	1.76
Am_Rn_000638	8464	PNY07558.1_gag-pol polyprotein [Trifolium pratense]	ATMG00860.1_DNA/RNA polymerases superfamily protein, GeneName=ORF158	.	0.596667	0.353333	0.373333	1.42667	0.64	0.99	0.16	0.34	0.72	0	0	0.58	0.54	1.63	1.59	1.06
Am_Rn_000639	8464	RHN71246.1_putative RNA-directed DNA polymerase [Medicago truncatula]	AT5G63280.1_C2H2-like zinc finger protein	IPR001584_Integrase, catalytic core; IPR025724_GAG-pre-integrase domain; IPR012337_Ribonuclease H-like superfamily	0.123333	0.163333	0.676667	0.21	0.13	0.04	0.2	0.15	0.24	0.1	0.34	0.89	0.8	0.34	0.15	0.14
Am_Rn_000640	8464	PNY03500.1_3-hydroxyisobutyryl-CoA hydrolase-like protein mitochondrial-like [Trifolium pratense]	AT3G60510.3_ATP-dependent caseinolytic (Clp) protease/crotonase family protein	.	0.19	0.626667	0.856667	0.706667	0.08	0.47	0.02	0.49	1.09	0.3	0.39	1.14	1.04	0.56	0.97	0.59
Am_Rn_000641	8463	RDX66355.1_Alpha-mannosidase I MNS4, partial [Mucuna pruriens]	AT5G43710.2_Glycosyl hydrolase family 47 protein	IPR001382_Glycoside hydrolase family 47; IPR036026_Seven-hairpin glycosidases	0.14	0.356667	0.28	0.436667	0.13	0.24	0.05	0.39	0.43	0.25	0.18	0.33	0.33	0.53	0.41	0.37
Am_Rn_000642	8461	XP_004505260.1_putative 1-phosphatidylinositol-3-phosphate 5-kinase FAB1C isoform X3 [Cicer arietinum] XP_012572566.1 putative 1-phosphatidylinositol-3-phosphate 5-kinase FAB1C isoform X1 [Cicer arietinum] XP_027191573.1 putative 1-phosphatidylinositol-3-phosphate 5-kinase FAB1C isoform X2 [Cicer arietinum]	AT1G71010.1_FORMS APLOID AND BINUCLEATE CELLS 1C, GeneName=FAB1C	IPR002423_Chaperonin Cpn60/GroEL/TCP-1 family; IPR027409_GroEL-like apical domain superfamily	1.61667	1.36333	1.67333	2.11333	0	1.66	3.19	3.16	0.18	0.75	0	1.45	3.57	0	4.88	1.46
Am_Rn_000643	8458	TKY73850.1_Zinc finger CCCH domain-containing protein 38 [Spatholobus suberectus]	AT3G18640.1_Zinc finger C-x8-C-x5-C-x3-H type family protein	IPR000571_Zinc finger, CCCH-type; IPR036855_Zinc finger, CCCH-type superfamily	0.866667	4.38667	1.75333	2.95	0.82	1.2	0.58	3.07	5.01	5.08	1.49	1.38	2.39	2.53	2.88	3.44
Am_Rn_000644	8457	XP_020216509.1_uncharacterized protein LOC109800181 [Cajanus cajan]	AT4G35690.1_hypothetical protein (DUF241)	IPR004320_Protein BPS1, chloroplastic	0.496667	0.64	0.423333	0.923333	0.54	0.38	0.57	0.67	0.85	0.4	0.12	0.46	0.69	0.59	0.88	1.3
Am_Rn_000645	8455	TKY47855.1_Mediator of RNA polymerase II transcription subunit 13 [Spatholobus suberectus]	AT1G55325.2_RNA polymerase II transcription mediator, GeneName=GCT	IPR009401_Mediator complex subunit Med13, C-terminal; IPR041285_MID domain of medPIWI	0.0166667	0	0.206667	0.0233333	0	0	0.05	0	0	0	0	0.62	0	0.07	0	0
Am_Rn_000646	8449	GAU44417.1_hypothetical protein TSUD_100640 [Trifolium subterraneum]	AT4G23160.3_cysteine-rich RECEPTOR-like kinase, GeneName=CRK8	IPR013103_Reverse transcriptase, RNA-dependent DNA polymerase; IPR043502_DNA/RNA polymerase superfamily	0.0333333	0.806667	0.336667	0.273333	0.05	0	0.05	0.88	0.94	0.6	0.12	0.26	0.63	0.29	0.24	0.29
Am_Rn_000647	8448	XP_004501262.1_uncharacterized protein LOC101502765 isoform X1 [Cicer arietinum] XP_027190322.1 uncharacterized protein LOC101502765 isoform X2 [Cicer arietinum]	AT2G25730.3_zinc finger FYVE domain protein	.	9.10333	15.09	9.85667	13.6433	8.08	12.5	6.73	13.77	16.53	14.97	4.17	12.74	12.66	11.44	14.17	15.32
Am_Rn_000648	8447	PNX76926.1_phosphoglycerate mutase-like protein [Trifolium pratense] PNX77242.1 phosphoglycerate mutase-like protein [Trifolium pratense]	AT5G64460.5_Phosphoglycerate mutase family protein	.	0.06	0.216667	0.283333	0.173333	0	0	0.18	0.22	0.15	0.28	0.07	0.36	0.42	0.27	0.25	0
Am_Rn_000649	8444	XP_025982707.1_inositol hexakisphosphate and diphosphoinositol-pentakisphosphate kinase VIP2 isoform X3 [Glycine max] XP_028213384.1 inositol hexakisphosphate and diphosphoinositol-pentakisphosphate kinase VIP2-like isoform X3 [Glycine soja]	AT5G15070.6_Phosphoglycerate mutase-like family protein	.	0.5	0.776667	0.253333	0.403333	0.43	0.35	0.72	0.6	0.97	0.76	0.05	0.37	0.34	0.25	0.49	0.47
Am_Rn_000650	8442	XP_027366346.1_clathrin light chain 1-like [Abrus precatorius]	AT2G20760.1_Clathrin light chain protein	IPR019557_Aminotransferase-like, plant mobile domain	0.956667	5.36	2.29333	3.00333	1.34	1.2	0.33	5.48	6.21	4.39	2	2.51	2.37	2.45	3.54	3.02
Am_Rn_000651	8442	XP_004500064.1_uncharacterized protein LOC101510812 [Cicer arietinum]	AT4G27010.2_ribosome 60S biogenesis amino-terminal protein, GeneName=EMB2788	IPR021714_Nucleolar pre-ribosomal-associated protein 1, N-terminal	0.2	0.15	0.0466667	0.0466667	0.13	0	0.47	0	0.2	0.25	0.14	0	0	0	0	0.14
Am_Rn_000652	8440	KYP54028.1_Retrovirus-related Pol polyprotein LINE-1 [Cajanus cajan]	AT3G24255.5_RNA-directed DNA polymerase (reverse transcriptase)-related family protein	IPR000477_Reverse transcriptase domain; IPR043502_DNA/RNA polymerase superfamily	0.14	0.566667	0.656667	0.906667	0.09	0.15	0.18	0.84	0.43	0.43	0.66	0.67	0.64	1.11	1.23	0.38
Am_Rn_000653	8439	KEH27671.1_neutral alpha-glucosidase [Medicago truncatula]	AT3G23640.3_heteroglycan glucosidase 1, GeneName=HGL1	IPR000322_Glycoside hydrolase family 31; IPR017853_Glycoside hydrolase superfamily; IPR025887_Glycoside hydrolase family 31, N-terminal domain; IPR011013_Galactose mutarotase-like domain superfamily	1.38	1.36	1.17	2.28333	1.16	2.04	0.94	0.98	1.71	1.39	1.3	1.23	0.98	2.06	3.1	1.69
Am_Rn_000654	8437	KYP38573.1_Retrovirus-related Pol polyprotein from transposon TNT 1-94, partial [Cajanus cajan]	AT4G23160.3_cysteine-rich RECEPTOR-like kinase, GeneName=CRK8	IPR043502_DNA/RNA polymerase superfamily; IPR012337_Ribonuclease H-like superfamily; IPR013103_Reverse transcriptase, RNA-dependent DNA polymerase; IPR001584_Integrase, catalytic core; IPR025724_GAG-pre-integrase domain	0.65	2.27333	1.29667	1.37	0.18	1.61	0.16	2.17	2.74	1.91	0.88	0.98	2.03	2.11	1.07	0.93
Am_Rn_000655	8436	XP_027188810.1_protein SUPPRESSOR OF QUENCHING 1, chloroplastic isoform X2 [Cicer arietinum]	AT1G56500.3_haloacid dehalogenase-like hydrolase family protein	IPR001258_NHL repeat; IPR012336_Thioredoxin-like fold; IPR036249_Thioredoxin-like superfamily; IPR000033_LDLR class B repeat	0.04	0	0	0.0766667	0	0.12	0	0	0	0	0	0	0	0.23	0	0
Am_Rn_000656	8434	TKY61766.1_Histone-lysine N-methyltransferase ATX3 [Spatholobus suberectus]	AT3G61740.2_SET domain protein 14, GeneName=SDG14	IPR011011_Zinc finger, FYVE/PHD-type; IPR019787_Zinc finger, PHD-finger; IPR001965_Zinc finger, PHD-type	0.0466667	0.373333	0.533333	0.67	0	0	0.14	0.24	0.64	0.24	0.12	0.72	0.76	0.53	0.8	0.68
Am_Rn_000657	8433	TKY64932.1_hypothetical protein E2542_SST07783 [Spatholobus suberectus]	AT1G27980.1_dihydrosphingosine phosphate lyase, GeneName=DPL1	.	0.09	0.106667	0.0466667	1.84667	0	0	0.27	0.16	0.16	0	0	0.14	0	0.16	3	2.38
Am_Rn_000658	8433	XP_003517639.1_receptor-like protein kinase HSL1 [Glycine max] XP_028226676.1 receptor-like protein kinase HSL1 [Glycine soja] KAH1161010.1 hypothetical protein GYH30_000076 [Glycine max] KAH1264088.1 Receptor-like protein kinase HSL1 [Glycine max] KRH74250.1 hypothetical protein GLYMA_01G007500v4 [Glycine max] RZC27852.1 Receptor-like protein kinase HSL1 [Glycine soja]	AT5G25930.1_kinase family with leucine-rich repeat domain-containing protein	IPR000719_Protein kinase domain; IPR001611_Leucine-rich repeat; IPR011009_Protein kinase-like domain superfamily; IPR003591_Leucine-rich repeat, typical subtype	31.2967	24.3567	8.80333	21.0567	24.54	34.21	35.14	23.52	21.1	28.45	4.37	8.98	13.06	26.88	17.78	18.51
Am_Rn_000659	8433	XP_024630962.1_putative aminoacrylate hydrolase RutD isoform X2 [Medicago truncatula]	AT5G53050.6_alpha/beta-Hydrolases superfamily protein	.	1.67	2.39	0.563333	0	0	0	5.01	0.82	3.84	2.51	0	0	1.69	0	0	0
Am_Rn_000660	8430	XP_045815894.1_ABC transporter D family member 1-like [Trifolium pratense]	AT4G39850.3_peroxisomal ABC transporter 1, GeneName=ABCD1	IPR011527_ABC transporter type 1, transmembrane domain; IPR027417_P-loop containing nucleoside triphosphate hydrolase; IPR003439_ABC transporter-like, ATP-binding domain; IPR036640_ABC transporter type 1, transmembrane domain superfamily; IPR003593_AAA+ ATPase domain	0.546667	0.33	0.896667	0.573333	0.23	0.45	0.96	0.23	0.31	0.45	0.25	0.98	1.46	0.92	0.25	0.55
Am_Rn_000661	8429	XP_004492913.1_uncharacterized protein LOC101503595 [Cicer arietinum]	AT5G23520.1_smr (Small MutS Related) domain-containing protein	IPR002625_Smr domain; IPR036063_Smr domain superfamily; IPR013899_Domain of unknown function DUF1771	11.6133	4.25	2.49667	4.16	15.76	7.98	11.1	4.36	5.42	2.97	1.97	3.23	2.29	5.68	4.87	1.93
Am_Rn_000662	8427	XP_026284061.1_CCR4-NOT transcription complex subunit 1 [Frankliniella occidentalis]	AT1G02080.3_transcription regulator	IPR024557_CCR4-NOT transcription complex subunit 1, domain 4; IPR007196_CCR4-Not complex component, Not1, C-terminal; IPR032191_CCR4-NOT transcription complex subunit 1, CAF1-binding domain; IPR032193_CCR4-NOT transcription complex subunit 1, TTP binding domain; IPR032194_CCR4-NOT transcription complex subunit 1, HEAT repeat	0	0.0733333	1.49	0	0	0	0	0	0.1	0.12	3.5	0.49	0.48	0	0	0
Am_Rn_000663	8426	XP_004509565.1_alpha-glucan water dikinase, chloroplastic isoform X2 [Cicer arietinum]	AT1G10760.1_Pyruvate phosphate dikinase, PEP/pyruvate binding domain-containing protein, GeneName=SEX1	IPR005162_Retrotransposon gag domain	0.25	0.586667	0.133333	0.556667	0.03	0.65	0.07	0.23	0.97	0.56	0.12	0.1	0.18	0.12	1	0.55
Am_Rn_000664	8423	XP_004505260.1_putative 1-phosphatidylinositol-3-phosphate 5-kinase FAB1C isoform X3 [Cicer arietinum] XP_012572566.1 putative 1-phosphatidylinositol-3-phosphate 5-kinase FAB1C isoform X1 [Cicer arietinum] XP_027191573.1 putative 1-phosphatidylinositol-3-phosphate 5-kinase FAB1C isoform X2 [Cicer arietinum]	AT1G71010.1_FORMS APLOID AND BINUCLEATE CELLS 1C, GeneName=FAB1C	IPR027409_GroEL-like apical domain superfamily; IPR002423_Chaperonin Cpn60/GroEL/TCP-1 family	26.0933	11.57	20.5567	29.3467	28.99	24.8	24.49	8.68	14.31	11.72	11.06	25.41	25.2	22.83	40.12	25.09
Am_Rn_000665	8421	KAH1205194.1_Phosphoglucan phosphatase LSF1, chloroplastic [Glycine max]	AT3G01510.1_like SEX4 1, GeneName=LSF1	.	0.03	0.15	0.173333	0.356667	0.07	0.01	0.01	0.14	0.17	0.14	0.11	0.3	0.11	0.26	0.44	0.37
Am_Rn_000666	8419	RDX60768.1_PHD finger protein ALFIN-LIKE 7, partial [Mucuna pruriens]	AT2G02470.2_alfin-like 6, GeneName=AL6	IPR001965_Zinc finger, PHD-type; IPR019787_Zinc finger, PHD-finger; IPR011011_Zinc finger, FYVE/PHD-type	1.94	1.27333	1.46667	1.57667	1.26	3.69	0.87	1.26	1.45	1.11	0.57	1.94	1.89	1.57	1.53	1.63
Am_Rn_000667	8417	GAU48536.1_hypothetical protein TSUD_282880 [Trifolium subterraneum]	AT1G43760.1_DNAse I-like superfamily protein	IPR026960_Reverse transcriptase zinc-binding domain; IPR043502_DNA/RNA polymerase superfamily; IPR036691_Endonuclease/exonuclease/phosphatase superfamily; IPR000477_Reverse transcriptase domain	2.45333	1.18667	0.916667	0.65	1.03	0.56	5.77	0.42	2.38	0.76	0.36	1.12	1.27	0.43	0.41	1.11
Am_Rn_000668	8417	XP_045794909.1_lysine-specific demethylase JMJ25 isoform X3 [Trifolium pratense]	AT4G00990.1_Transcription factor jumonji (jmjC) domain-containing protein	IPR003347_JmjC domain	0.166667	0.603333	0.35	0.45	0	0.5	0	0.58	1.23	0	0.61	0.44	0	1.16	0.19	0
Am_Rn_000669	8417	PNX93770.1_histone deacetylase [Trifolium pratense]	ATMG00810.1_DNA/RNA polymerases superfamily protein, GeneName=ORF240B	IPR025724_GAG-pre-integrase domain	1.18667	5.40667	2.87	2.5	1.27	1.56	0.73	6.44	5.86	3.92	1.61	3.77	3.23	3.12	3.19	1.19
Am_Rn_000670	8416	GAU13153.1_hypothetical protein TSUD_112140, partial [Trifolium subterraneum]	AT3G42723.1_ATP binding / aminoacyl-tRNA ligase/ nucleotide binding protein	IPR012337_Ribonuclease H-like superfamily; IPR023780_Chromo domain; IPR041588_Integrase zinc-binding domain; IPR000953_Chromo/chromo shadow domain; IPR016197_Chromo-like domain superfamily	0.0766667	0.0933333	0.0466667	0.116667	0.17	0.04	0.02	0.18	0	0.1	0.02	0.05	0.07	0.14	0.05	0.16
Am_Rn_000671	8415	XP_020217117.1_serine/threonine-protein kinase TOR [Cajanus cajan]	AT1G50030.1_target of rapamycin, GeneName=TOR	IPR003151_PIK-related kinase, FAT; IPR009076_FKBP12-rapamycin binding domain; IPR011990_Tetratricopeptide-like helical domain superfamily; IPR016024_Armadillo-type fold; IPR036738_FKBP12-rapamycin binding domain superfamily; IPR024585_Domain of unknown function DUF3385, target of rapamycin protein	0.216667	0.23	0.17	0.64	0.19	0.34	0.12	0.23	0	0.46	0	0.51	0	0.22	1.45	0.25
Am_Rn_000672	8413	XP_004499218.1_lysine-specific histone demethylase 1 homolog 3 isoform X1 [Cicer arietinum] XP_004499221.1 lysine-specific histone demethylase 1 homolog 3 isoform X1 [Cicer arietinum] XP_012570825.1 lysine-specific histone demethylase 1 homolog 3 isoform X1 [Cicer arietinum] XP_027189607.1 lysine-specific histone demethylase 1 homolog 3 isoform X1 [Cicer arietinum]	AT4G16310.3_LSD1-like 3, GeneName=LDL3	IPR009057_Homeobox-like domain superfamily; IPR035441_TFIIS/LEDGF domain superfamily; IPR007526_SWIRM domain; IPR002937_Amine oxidase; IPR036188_FAD/NAD(P)-binding domain superfamily	0.516667	0.0466667	0.123333	0	0.23	0.22	1.1	0.14	0	0	0.06	0.31	0	0	0	0
Am_Rn_000673	8413	XP_004487927.1_histone-lysine N-methyltransferase ATXR7 isoform X4 [Cicer arietinum]	AT5G42400.2_SET domain protein 25, GeneName=SDG25	IPR043502_DNA/RNA polymerase superfamily	1.76667	0.126667	0.203333	0.44	3.12	1.06	1.12	0	0.09	0.29	0.28	0.2	0.13	0.44	0.55	0.33
Am_Rn_000674	8412	XP_004494344.1_uncharacterized protein LOC101503823 isoform X1 [Cicer arietinum] XP_004494345.1 uncharacterized protein LOC101503823 isoform X1 [Cicer arietinum] XP_004494346.1 uncharacterized protein LOC101503823 isoform X1 [Cicer arietinum] XP_012569589.1 uncharacterized protein LOC101503823 isoform X1 [Cicer arietinum]	AT3G62900.2_CW-type Zinc Finger	IPR011124_Zinc finger, CW-type	0.493333	0.29	0.44	0.293333	0.67	0.81	0	0	0.48	0.39	0.49	0.59	0.24	0.51	0.19	0.18
Am_Rn_000675	8408	RHN71246.1_putative RNA-directed DNA polymerase [Medicago truncatula]	AT5G06370.1_NC domain-containing protein-like protein	IPR036875_Zinc finger, CCHC-type superfamily; IPR012337_Ribonuclease H-like superfamily; IPR001878_Zinc finger, CCHC-type; IPR001584_Integrase, catalytic core; IPR025724_GAG-pre-integrase domain	2.39333	2.9	3.68	2.47	2.49	2.45	2.24	2.72	3.15	2.83	1.43	5.02	4.59	1.9	2.68	2.83
Am_Rn_000676	8400	RZB75684.1_Retrovirus-related Pol polyprotein from transposon TNT 1-94 [Glycine soja]	AT4G23160.3_cysteine-rich RECEPTOR-like kinase, GeneName=CRK8	IPR025724_GAG-pre-integrase domain; IPR012337_Ribonuclease H-like superfamily	0.0633333	0.366667	0.386667	0.49	0.13	0.06	0	0.21	0.27	0.62	0.28	0.34	0.54	0.55	0.35	0.57
Am_Rn_000677	8399	GAU27030.1_hypothetical protein TSUD_313920 [Trifolium subterraneum]	AT2G25140.1_casein lytic proteinase B4, GeneName=CLPB4	IPR003959_ATPase, AAA-type, core; IPR027417_P-loop containing nucleoside triphosphate hydrolase; IPR019489_Clp ATPase, C-terminal; IPR041546_ClpA/ClpB, AAA lid domain; IPR001270_ClpA/B family; IPR003593_AAA+ ATPase domain	0.0566667	0.29	0.243333	0.506667	0.07	0.03	0.07	0.16	0.49	0.22	0.11	0.38	0.24	0.34	0.7	0.48
Am_Rn_000678	8399	KAG4979289.1_hypothetical protein JHK85_033247 [Glycine max] KAG5118118.1 hypothetical protein JHK82_032538 [Glycine max] KAG5139102.1 hypothetical protein JHK84_032870 [Glycine max]	AT3G03060.1_P-loop containing nucleoside triphosphate hydrolases superfamily protein	.	0.103333	0.266667	0.113333	0.33	0.07	0.19	0.05	0.28	0.07	0.45	0	0.18	0.16	0.21	0.34	0.44
Am_Rn_000679	8398	XP_026284174.1_apolipophorins [Frankliniella occidentalis]	.	IPR001846_von Willebrand factor, type D domain; IPR009454_Lipid transport, open beta-sheet	0	0.166667	4.34	0	0	0	0	0	0.28	0.22	9.41	2.45	1.16	0	0	0
Am_Rn_000680	8392	MCH80155.1_copia-type polyprotein [Trifolium medium]	AT4G24160.2_alpha/beta-Hydrolases superfamily protein	IPR013103_Reverse transcriptase, RNA-dependent DNA polymerase; IPR012337_Ribonuclease H-like superfamily; IPR043502_DNA/RNA polymerase superfamily	5.05	0.61	0.766667	0.286667	0.85	10.92	3.38	0.39	0.75	0.69	0.19	0.83	1.28	0.25	0.27	0.34
Am_Rn_000681	8390	XP_024630962.1_putative aminoacrylate hydrolase RutD isoform X2 [Medicago truncatula]	AT5G53050.6_alpha/beta-Hydrolases superfamily protein	.	1.50333	4.89667	0.64	1.57333	1.58	2.81	0.12	12.28	0	2.41	0.62	1.3	0	2.54	0.88	1.3
Am_Rn_000682	8388	XP_045801476.1_uncharacterized protein C24B11.05-like [Trifolium pratense]	AT5G59480.1_Haloacid dehalogenase-like hydrolase (HAD) superfamily protein	IPR005162_Retrotransposon gag domain	1.15333	1.57667	0.666667	1.12333	0.93	0.26	2.27	2.55	0.73	1.45	0.42	0.58	1	2.41	0.53	0.43
Am_Rn_000683	8385	XP_045794909.1_lysine-specific demethylase JMJ25 isoform X3 [Trifolium pratense]	AT4G00990.1_Transcription factor jumonji (jmjC) domain-containing protein	IPR003347_JmjC domain	0.15	0.676667	0.97	0.566667	0.32	0	0.13	0	0.67	1.36	0	1.17	1.74	0	1.22	0.48
Am_Rn_000684	8376	XP_034687654.1_G-type lectin S-receptor-like serine/threonine-protein kinase LECRK3 [Vitis riparia]	AT5G19180.1_E1 C-terminal related 1, GeneName=ECR1	IPR001480_Bulb-type lectin domain; IPR024171_S-receptor-like serine/threonine-protein kinase; IPR000719_Protein kinase domain; IPR036426_Bulb-type lectin domain superfamily; IPR011009_Protein kinase-like domain superfamily	3.45	2.01667	2.57	4.11333	1.09	4.39	4.87	1.08	3.08	1.89	2.27	3.25	2.19	3.91	3.22	5.21
Am_Rn_000685	8374	XP_012567490.1_disease resistance-like protein DSC1 isoform X2 [Cicer arietinum]	AT5G14250.1_Proteasome component (PCI) domain protein, GeneName=COP13	.	2.34	1.26333	0.756667	1.18667	1.94	1.55	3.53	2.31	0.7	0.78	0.21	0.89	1.17	2.62	0.53	0.41
Am_Rn_000686	8374	PNX58976.1_cysteine-rich receptor-like protein kinase, partial [Trifolium pratense]	.	IPR025558_Domain of unknown function DUF4283	0.03	0.08	0.0766667	0.0566667	0.06	0	0.03	0.13	0.11	0	0.03	0.02	0.18	0.05	0.03	0.09
Am_Rn_000687	8370	RZC15285.1_CHD3-type chromatin-remodeling factor PICKLE isoform A, partial [Glycine soja]	AT2G25170.3_chromatin remodeling factor CHD3 (PICKLE), GeneName=PKL	IPR016197_Chromo-like domain superfamily; IPR001965_Zinc finger, PHD-type; IPR014001_Helicase superfamily 1/2, ATP-binding domain; IPR019787_Zinc finger, PHD-finger; IPR000330_SNF2, N-terminal; IPR023780_Chromo domain; IPR000953_Chromo/chromo shadow domain; IPR027417_P-loop containing nucleoside triphosphate hydrolase; IPR001650_Helicase, C-terminal; IPR009463_Domain of unknown function DUF1087	2.64	10.6867	7.95667	8.70667	2.4	3.41	2.11	9.52	11.11	11.43	4.14	10.93	8.8	7.04	9.03	10.05
Am_Rn_000688	8370	XP_027342738.1_LEAF RUST 10 DISEASE-RESISTANCE LOCUS RECEPTOR-LIKE PROTEIN KINASE-like 2.1 isoform X1 [Abrus precatorius]	AT5G38260.1_Protein kinase superfamily protein	IPR032872_Wall-associated receptor kinase, C-terminal; IPR011009_Protein kinase-like domain superfamily; IPR025287_Wall-associated receptor kinase, galacturonan-binding domain; IPR000719_Protein kinase domain	15.0733	30.4167	4.84667	26.28	1.61	31.51	12.1	34.24	29.03	27.98	3.17	4.77	6.6	38.44	15.22	25.18
Am_Rn_000689	8367	XP_004494358.1_dephospho-CoA kinase [Cicer arietinum] XP_012569485.1 dephospho-CoA kinase [Cicer arietinum]	AT2G27490.1_dephospho-CoA kinase family, GeneName=ATCOAE	IPR006121_Heavy metal-associated domain, HMA; IPR036163_Heavy metal-associated domain superfamily	0.0166667	0.33	0.223333	0.443333	0	0	0.05	0.44	0.25	0.3	0.26	0.24	0.17	0.64	0.18	0.51
Am_Rn_000690	8364	XP_027337807.1_CCR4-NOT transcription complex subunit 1 [Abrus precatorius]	AT1G02080.2_transcription regulator	IPR032194_CCR4-NOT transcription complex subunit 1, HEAT repeat; IPR007196_CCR4-Not complex component, Not1, C-terminal; IPR024557_CCR4-NOT transcription complex subunit 1, domain 4; IPR032191_CCR4-NOT transcription complex subunit 1, CAF1-binding domain; IPR032193_CCR4-NOT transcription complex subunit 1, TTP binding domain	0	0.14	0.546667	0.156667	0	0	0	0.42	0	0	0.26	0.62	0.76	0	0.47	0
Am_Rn_000691	8363	XP_004510941.1_brefeldin A-inhibited guanine nucleotide-exchange protein 2 [Cicer arietinum]	AT3G60860.1_SEC7-like guanine nucleotide exchange family protein	IPR015403_Sec7, C-terminal; IPR032817_Mon2, C-terminal; IPR016024_Armadillo-type fold	0.07	0.306667	0.266667	0.45	0.1	0.11	0	0.29	0.41	0.22	0.15	0.26	0.39	0.07	0.7	0.58
Am_Rn_000692	8363	RZB75684.1_Retrovirus-related Pol polyprotein from transposon TNT 1-94 [Glycine soja]	AT2G01440.1_DEAD/DEAH box RNA helicase family protein	IPR025724_GAG-pre-integrase domain; IPR012337_Ribonuclease H-like superfamily	0	0.07	0	0.103333	0	0	0	0	0.21	0	0	0	0	0	0.31	0
Am_Rn_000693	8361	XP_004505260.1_putative 1-phosphatidylinositol-3-phosphate 5-kinase FAB1C isoform X3 [Cicer arietinum] XP_012572566.1 putative 1-phosphatidylinositol-3-phosphate 5-kinase FAB1C isoform X1 [Cicer arietinum] XP_027191573.1 putative 1-phosphatidylinositol-3-phosphate 5-kinase FAB1C isoform X2 [Cicer arietinum]	AT1G71010.1_FORMS APLOID AND BINUCLEATE CELLS 1C, GeneName=FAB1C	IPR002423_Chaperonin Cpn60/GroEL/TCP-1 family; IPR027409_GroEL-like apical domain superfamily; IPR002498_Phosphatidylinositol-4-phosphate 5-kinase, core	21.48	10.6267	11.6567	27.5233	24.78	25.16	14.5	6.48	13.12	12.28	2.53	16.68	15.76	16.98	38.35	27.24
Am_Rn_000694	8361	XP_004499912.1_DNA topoisomerase 2 [Cicer arietinum] XP_004517303.1 DNA topoisomerase 2 [Cicer arietinum]	AT3G23890.2_topoisomerase II, GeneName=TOPII	IPR002205_DNA topoisomerase, type IIA, domain A; IPR001154_DNA topoisomerase II, eukaryotic-type; IPR001241_DNA topoisomerase, type IIA; IPR036890_Histidine kinase/HSP90-like ATPase superfamily; IPR013760_DNA topoisomerase, type IIA-like domain superfamily; IPR003594_Histidine kinase/HSP90-like ATPase	4.95667	3.25667	3.93667	4.28	5.88	4.61	4.38	2.98	3.3	3.49	4.62	3.46	3.73	3.86	4.42	4.56
Am_Rn_000695	8359	XP_045787806.1_uncharacterized protein LOC123883130 isoform X2 [Trifolium pratense]	AT2G46560.1_transducin family protein / WD-40 repeat family protein	IPR022033_RAVE complex protein Rav1 C-terminal; IPR036322_WD40-repeat-containing domain superfamily; IPR001680_WD40 repeat	0.17	0.166667	0	0.103333	0.46	0	0.05	0.39	0.11	0	0	0	0	0.18	0	0.13
Am_Rn_000696	8359	XP_027365171.1_respiratory burst oxidase homolog protein B-like [Abrus precatorius]	AT1G09090.2_respiratory burst oxidase-like protein, GeneName=RBOHB	IPR013130_Ferric reductase transmembrane component-like domain; IPR013112_FAD-binding 8; IPR011992_EF-hand domain pair; IPR017938_Riboflavin synthase-like beta-barrel; IPR013121_Ferric reductase, NAD binding domain; IPR039261_Ferredoxin-NADP reductase (FNR), nucleotide-binding domain; IPR000778_Cytochrome b245, heavy chain	0.166667	0.796667	0.586667	0.996667	0.21	0.24	0.05	0.44	1.05	0.9	0.37	0.64	0.75	0.68	1.15	1.16
Am_Rn_000697	8357	XP_027337807.1_CCR4-NOT transcription complex subunit 1 [Abrus precatorius]	AT1G02080.2_transcription regulator	IPR032194_CCR4-NOT transcription complex subunit 1, HEAT repeat; IPR024557_CCR4-NOT transcription complex subunit 1, domain 4; IPR032193_CCR4-NOT transcription complex subunit 1, TTP binding domain; IPR032191_CCR4-NOT transcription complex subunit 1, CAF1-binding domain	0	0	0	0.106667	0	0	0	0	0	0	0	0	0	0.32	0	0
Am_Rn_000698	8352	PNY17867.1_hypothetical protein L195_g014621, partial [Trifolium pratense]	ATMG00860.1_DNA/RNA polymerases superfamily protein, GeneName=ORF158	IPR016197_Chromo-like domain superfamily; IPR043502_DNA/RNA polymerase superfamily; IPR041577_Reverse transcriptase/retrotransposon-derived protein, RNase H-like domain; IPR001584_Integrase, catalytic core; IPR012337_Ribonuclease H-like superfamily; IPR041588_Integrase zinc-binding domain	0.533333	2.84	1.17333	0.943333	0.43	0.71	0.46	3.54	2.39	2.59	0.29	1.57	1.66	1.01	0.74	1.08
Am_Rn_000699	8347	XP_004496065.1_piezo-type mechanosensitive ion channel homolog isoform X1 [Cicer arietinum]	AT2G48060.2_piezo-type mechanosensitive ion channel component	IPR031334_Piezo non-specific cation channel, R-Ras-binding domain	12.2267	17.36	10.1533	13.9567	16.08	12.43	8.17	18.32	16.92	16.84	6.48	12.32	11.66	12.68	15.05	14.14
Am_Rn_000700	8347	XP_004503669.1_uncharacterized protein LOC101513289 [Cicer arietinum]	AT4G11270.1_Transducin/WD40 repeat-like superfamily protein	IPR001680_WD40 repeat; IPR036322_WD40-repeat-containing domain superfamily	0.29	0.703333	0.29	0.786667	0.3	0.28	0.29	0.84	0.75	0.52	0.09	0.65	0.13	0.63	0.95	0.78
Am_Rn_000701	8347	PNY15174.1_ribonuclease H, partial [Trifolium pratense]	ATMG01250.1_RNA-directed DNA polymerase (reverse transcriptase), GeneName=ORF102	IPR026960_Reverse transcriptase zinc-binding domain; IPR002156_Ribonuclease H domain	0.09	0.553333	0.333333	0.703333	0.18	0.05	0.04	0.91	0.48	0.27	0.03	0.6	0.37	0.77	0.66	0.68
Am_Rn_000702	8346	GAU48536.1_hypothetical protein TSUD_282880 [Trifolium subterraneum]	AT5G16390.2_chloroplastic acetylcoenzyme A carboxylase 1, GeneName=CAC1	IPR026960_Reverse transcriptase zinc-binding domain; IPR000477_Reverse transcriptase domain; IPR005135_Endonuclease/exonuclease/phosphatase; IPR043502_DNA/RNA polymerase superfamily; IPR036691_Endonuclease/exonuclease/phosphatase superfamily	8.81	17.2367	12.31	12.5	12.36	8.88	5.19	21.73	17.76	12.22	11.68	15.12	10.13	11.54	12.55	13.41
Am_Rn_000703	8346	KAH1252486.1_Kinesin-like protein KIN-4A [Glycine max]	AT5G47820.1_P-loop containing nucleoside triphosphate hydrolases superfamily protein, GeneName=FRA1	IPR027417_P-loop containing nucleoside triphosphate hydrolase; IPR001752_Kinesin motor domain	0.423333	0.0366667	0.0266667	0	0.03	0	1.24	0.11	0	0	0	0.08	0	0	0	0
Am_Rn_000704	8345	KZV25004.1_Cysteine-rich RLK (receptor-like protein kinase) 8 [Dorcoceras hygrometricum]	AT4G23160.3_cysteine-rich RECEPTOR-like kinase, GeneName=CRK8	IPR012337_Ribonuclease H-like superfamily; IPR001584_Integrase, catalytic core; IPR013103_Reverse transcriptase, RNA-dependent DNA polymerase; IPR043502_DNA/RNA polymerase superfamily	0.07	0.753333	0.433333	1.13	0	0	0.21	0.73	0.82	0.71	0.17	0.36	0.77	1.14	0.71	1.54
Am_Rn_000705	8337	PIN22487.1_DNA-directed DNA polymerase [Handroanthus impetiginosus]	AT4G35160.1_O-methyltransferase family protein	IPR000477_Reverse transcriptase domain; IPR043502_DNA/RNA polymerase superfamily; IPR041373_Reverse transcriptase, RNase H-like domain	0.0733333	0.0866667	0.436667	0.0666667	0.07	0.07	0.08	0	0.13	0.13	0.07	0.75	0.49	0.02	0.05	0.13
Am_Rn_000706	8335	BAG72151.1_hypothetical protein [Lotus japonicus]	AT4G32010.1_HSI2-like 1, GeneName=HSL1	IPR043502_DNA/RNA polymerase superfamily; IPR005162_Retrotransposon gag domain; IPR041577_Reverse transcriptase/retrotransposon-derived protein, RNase H-like domain; IPR000477_Reverse transcriptase domain; IPR021109_Aspartic peptidase domain superfamily	2.09333	1.83	0.953333	1.85333	3.53	1.61	1.14	1.9	2.09	1.5	0.33	0.96	1.57	1.34	2.3	1.92
Am_Rn_000707	8334	PNY12555.1_putative sphingolipid transporter spinster 2-like protein, partial [Trifolium pratense]	AT5G64500.1_Major facilitator superfamily protein	IPR036259_MFS transporter superfamily	13.19	0.09	0.323333	0.213333	19.39	10.99	9.19	0.04	0.16	0.07	0.34	0.27	0.36	0.15	0.11	0.38
Am_Rn_000708	8332	XP_045793296.1_pentatricopeptide repeat-containing protein At1g09900-like [Trifolium pratense] XP_045793297.1 pentatricopeptide repeat-containing protein At1g09900-like [Trifolium pratense] XP_045793298.1 pentatricopeptide repeat-containing protein At1g09900-like [Trifolium pratense] XP_045793299.1 pentatricopeptide repeat-containing protein At1g09900-like [Trifolium pratense] XP_045793300.1 pent…	.	IPR002885_Pentatricopeptide repeat	0.00666667	0.263333	0.103333	0.25	0	0	0.02	0.34	0.13	0.32	0	0.16	0.15	0.07	0.38	0.3
Am_Rn_000709	8329	XP_012573351.1_uncharacterized protein LOC101488675 [Cicer arietinum]	AT1G48090.2_calcium-dependent lipid-binding family protein	IPR009543_Vacuolar protein sorting-associated protein 13, SHR-binding domain	9.38	11.78	11.5667	20.3633	8.04	15.98	4.12	9.78	17.92	7.64	11.31	16.58	6.81	22.16	31.99	6.94
Am_Rn_000710	8328	XP_045826038.1_pentatricopeptide repeat-containing protein At1g62260, mitochondrial [Trifolium pratense]	AT1G62260.1_mitochondrial editing factor 9, GeneName=MEF9	IPR011990_Tetratricopeptide-like helical domain superfamily; IPR002885_Pentatricopeptide repeat	0.07	1.01667	1.43667	0.28	0	0.06	0.15	0.69	0.96	1.4	0.2	2.08	2.03	0.23	0.37	0.24
Am_Rn_000711	8325	XP_004487363.1_histone-lysine N-methyltransferase ATXR3-like [Cicer arietinum]	AT4G15180.1_SET domain protein 2, GeneName=SDG2	IPR036047_F-box-like domain superfamily	0.213333	0.423333	0.446667	0.616667	0.27	0	0.37	0.31	0.52	0.44	0.2	0.6	0.54	0.43	1.07	0.35
Am_Rn_000712	8325	XP_045819804.1_G-type lectin S-receptor-like serine/threonine-protein kinase At4g27290 isoform X1 [Trifolium pratense]	AT4G27290.1_S-locus lectin protein kinase family protein	IPR003609_PAN/Apple domain; IPR036426_Bulb-type lectin domain superfamily; IPR000858_S-locus glycoprotein domain; IPR001480_Bulb-type lectin domain; IPR035446_S-locus-specific glycoprotein/EP1	0	0.0833333	0.113333	0	0	0	0	0.1	0.15	0	0	0.34	0	0	0	0
Am_Rn_000713	8325	KAH1231259.1_Serine/threonine-protein kinase STY46 [Glycine max]	AT4G38470.3_ACT-like protein tyrosine kinase family protein, GeneName=STY46	IPR011009_Protein kinase-like domain superfamily; IPR000719_Protein kinase domain; IPR001245_Serine-threonine/tyrosine-protein kinase, catalytic domain	0.376667	0.45	1.12667	0.413333	0.22	0.27	0.64	0.33	0.55	0.47	0.45	1.69	1.24	0.53	0.42	0.29
Am_Rn_000714	8320	XP_004510655.1_uncharacterized protein LOC101490119 isoform X1 [Cicer arietinum]	AT2G46560.1_transducin family protein / WD-40 repeat family protein	IPR022033_RAVE complex protein Rav1 C-terminal; IPR001680_WD40 repeat; IPR036322_WD40-repeat-containing domain superfamily	8.35667	10.09	6.69333	11.7733	8.85	8.56	7.66	8.11	11.47	10.69	3.28	8.56	8.24	9.85	11.51	13.96
Am_Rn_000715	8320	KDO43166.1_hypothetical protein CISIN_1g00870322mg, partial [Citrus sinensis]	AT5G26360.1_TCP-1/cpn60 chaperonin family protein	IPR027409_GroEL-like apical domain superfamily	0.02	0.523333	0.15	0.22	0	0.06	0	0.25	0.92	0.4	0	0.29	0.16	0	0.07	0.59
Am_Rn_000716	8315	PNY14726.1_putative UDP-N-acetylglucosamine-peptide N-acetylglucosaminyltransferase SEC-like protein [Trifolium pratense]	AT3G04240.2_Tetratricopeptide repeat (TPR)-like superfamily protein, GeneName=SEC	IPR029489_O-GlcNAc transferase, C-terminal; IPR011990_Tetratricopeptide-like helical domain superfamily; IPR001440_Tetratricopeptide repeat 1; IPR019734_Tetratricopeptide repeat	0.156667	0.186667	0.31	0.366667	0	0.2	0.27	0	0.32	0.24	0.59	0.24	0.1	0.4	0.33	0.37
Am_Rn_000717	8310	GAU48828.1_hypothetical protein TSUD_190590, partial [Trifolium subterraneum]	AT4G17140.1_pleckstrin homology (PH) domain-containing protein	IPR009291_Vacuolar protein sorting-associated protein 62	0.25	1.15333	0.44	0.56	0.19	0.19	0.37	1.03	1.34	1.09	0.22	0.46	0.64	0.38	0.53	0.77
Am_Rn_000718	8309	XP_020217117.1_serine/threonine-protein kinase TOR [Cajanus cajan]	AT1G50030.1_target of rapamycin, GeneName=TOR	IPR011009_Protein kinase-like domain superfamily; IPR000403_Phosphatidylinositol 3-/4-kinase, catalytic domain; IPR024585_Domain of unknown function DUF3385, target of rapamycin protein; IPR009076_FKBP12-rapamycin binding domain; IPR036738_FKBP12-rapamycin binding domain superfamily; IPR011990_Tetratricopeptide-like helical domain superfamily; IPR003152_FATC domain; IPR003151_PIK-related kinase, …	0	0.22	0	0	0	0	0	0	0.66	0	0	0	0	0	0	0
Am_Rn_000719	8308	GAU27876.1_hypothetical protein TSUD_159700 [Trifolium subterraneum]	AT4G23160.3_cysteine-rich RECEPTOR-like kinase, GeneName=CRK8	IPR043502_DNA/RNA polymerase superfamily; IPR013103_Reverse transcriptase, RNA-dependent DNA polymerase	0.66	0.786667	0.483333	0.83	0.33	0.39	1.26	0.74	0.81	0.81	0.28	0.59	0.58	1.01	0.88	0.6
Am_Rn_000720	8305	XP_027337807.1_CCR4-NOT transcription complex subunit 1 [Abrus precatorius]	AT1G02080.2_transcription regulator	IPR032194_CCR4-NOT transcription complex subunit 1, HEAT repeat; IPR032191_CCR4-NOT transcription complex subunit 1, CAF1-binding domain; IPR032193_CCR4-NOT transcription complex subunit 1, TTP binding domain	0.196667	0.366667	0.203333	0.246667	0	0.35	0.24	0.32	0.41	0.37	0	0.27	0.34	0	0.34	0.4
Am_Rn_000721	8304	XP_004509208.1_uncharacterized protein LOC101497795 [Cicer arietinum]	AT3G50370.2_hypothetical protein	.	0.246667	0.133333	0.243333	0.43	0.29	0.36	0.09	0	0	0.4	0	0	0.73	0.41	0	0.88
Am_Rn_000722	8304	RHN69146.1_hypothetical protein MtrunA17_Chr3g0121561 [Medicago truncatula]	AT2G40540.3_potassium transporter 2, GeneName=KT2	.	5.39333	6	4.79	7.07667	6.37	5.49	4.32	5.86	6.31	5.83	4.62	4.94	4.81	6.19	5.99	9.05
Am_Rn_000723	8302	GAU26239.1_hypothetical protein TSUD_224300 [Trifolium subterraneum]	AT4G20520.1_RNA binding / RNA-directed DNA polymerase	IPR036691_Endonuclease/exonuclease/phosphatase superfamily	0.203333	0.383333	0.463333	0.333333	0.31	0.12	0.18	0.4	0.54	0.21	0.67	0.44	0.28	0.39	0.36	0.25
Am_Rn_000724	8294	BAF98233.1_CM0545.530.nc, partial [Lotus japonicus]	AT2G32640.2_Lycopene beta/epsilon cyclase protein	.	5.17667	6.08	6.50333	11.1367	5.28	6.35	3.9	5.26	6.22	6.76	3.31	8.24	7.96	11.5	13.23	8.68
Am_Rn_000725	8294	BAG72152.1_hypothetical protein [Lotus japonicus]	AT3G17450.1_hAT dimerization domain-containing protein	IPR021109_Aspartic peptidase domain superfamily; IPR043502_DNA/RNA polymerase superfamily; IPR000477_Reverse transcriptase domain	0.453333	0.496667	0.376667	0.473333	0.91	0.24	0.21	0.64	0.5	0.35	0	0.69	0.44	0.29	0.52	0.61
Am_Rn_000726	8291	XP_017439807.1_PREDICTED: probable ubiquitin conjugation factor E4 [Vigna angularis] BAU01324.1 hypothetical protein VIGAN_11053400 [Vigna angularis var. angularis]	AT5G15400.1_U-box domain-containing protein	IPR003613_U-box domain; IPR019474_Ubiquitin conjugation factor E4, core	0.163333	0.586667	0.53	0.806667	0.18	0.1	0.21	1	0.38	0.38	0.45	0.52	0.62	0.86	0.84	0.72
Am_Rn_000727	8288	XP_004503246.1_putative D-cysteine desulfhydrase 1, mitochondrial [Cicer arietinum]	AT1G48420.1_D-cysteine desulfhydrase, GeneName=D-CDES	IPR001926_Pyridoxal-phosphate dependent enzyme; IPR036052_Tryptophan synthase beta subunit-like PLP-dependent enzyme	0.98	1.81	1.75667	1.98333	0.56	1.19	1.19	1.58	1.9	1.95	1.15	2	2.12	1.87	1.78	2.3
Am_Rn_000728	8287	AAR13298.1_gag-pol polyprotein [Phaseolus vulgaris]	AT3G27020.1_YELLOW STRIPE like 6, GeneName=YSL6	IPR043502_DNA/RNA polymerase superfamily; IPR013103_Reverse transcriptase, RNA-dependent DNA polymerase; IPR012337_Ribonuclease H-like superfamily	0.01	0.03	0.126667	0.0166667	0	0	0.03	0	0.09	0	0.25	0.06	0.07	0	0	0.05
Am_Rn_000729	8287	PNX74924.1_ribonuclease H, partial [Trifolium pratense]	AT5G08320.2_E2F-associated phosphoprotein	IPR026960_Reverse transcriptase zinc-binding domain	0.46	0.22	0.24	0.29	0.43	0.3	0.65	0.2	0.28	0.18	0.08	0.23	0.41	0.24	0.41	0.22
Am_Rn_000730	8285	XP_004511695.1_uncharacterized protein LOC101504440 isoform X2 [Cicer arietinum]	AT4G17330.3_G2484-1 protein, GeneName=G2484-1	IPR008395_Agenet-like domain	0.1	0.04	0.09	0.113333	0	0.13	0.17	0.12	0	0	0.1	0	0.17	0.2	0	0.14
Am_Rn_000731	8282	XP_012570050.1_piezo-type mechanosensitive ion channel homolog isoform X3 [Cicer arietinum]	AT2G48060.2_piezo-type mechanosensitive ion channel component	IPR031334_Piezo non-specific cation channel, R-Ras-binding domain	0.45	0.943333	0.533333	0.666667	0.83	0.22	0.3	1.6	1.08	0.15	0.38	0.44	0.78	1.06	0.28	0.66
Am_Rn_000732	8275	TKY64814.1_NtpR protein [Spatholobus suberectus]	AT5G38200.1_Class I glutamine amidotransferase-like superfamily protein	IPR029062_Class I glutamine amidotransferase-like; IPR011697_Peptidase C26	6.35333	7.31667	7.77667	10.3833	5.99	8.39	4.68	6.79	8.06	7.1	6.14	9.29	7.9	9.6	11.23	10.32
Am_Rn_000733	8274	XP_045819941.1_E3 ubiquitin-protein ligase KEG isoform X1 [Trifolium pratense]	AT5G13530.1_protein kinases;ubiquitin-protein ligase, GeneName=KEG	IPR002110_Ankyrin repeat; IPR000719_Protein kinase domain; IPR036770_Ankyrin repeat-containing domain superfamily; IPR001841_Zinc finger, RING-type; IPR011009_Protein kinase-like domain superfamily; IPR027370_RING-type zinc-finger, LisH dimerisation motif	0.24	0.38	0.113333	0.326667	0.19	0.22	0.31	0.2	0.44	0.5	0.03	0.31	0	0.35	0.18	0.45
Am_Rn_000734	8272	TKY74808.1_phosphatase 2C 60 [Spatholobus suberectus]	AT4G31860.1_Protein phosphatase 2C family protein	IPR002885_Pentatricopeptide repeat; IPR011990_Tetratricopeptide-like helical domain superfamily	0.44	1.19667	0.976667	0.95	0.35	0.47	0.5	1.23	1.29	1.07	0.26	1.32	1.35	0.74	0.58	1.53
Am_Rn_000735	8271	XP_027188137.1_chromodomain-helicase-DNA-binding protein 3-like isoform X1 [Cicer arietinum]	AT2G37040.1_PHE ammonia lyase 1, GeneName=PAL1	IPR027417_P-loop containing nucleoside triphosphate hydrolase; IPR001965_Zinc finger, PHD-type; IPR016197_Chromo-like domain superfamily; IPR000953_Chromo/chromo shadow domain	3.04	5.49333	4.11	9.61333	1.71	5.97	1.44	4.23	6.25	6	2.86	4.83	4.64	7.97	10.23	10.64
Am_Rn_000736	8270	PIN22487.1_DNA-directed DNA polymerase [Handroanthus impetiginosus]	AT4G35160.1_O-methyltransferase family protein	IPR000477_Reverse transcriptase domain; IPR043502_DNA/RNA polymerase superfamily; IPR041373_Reverse transcriptase, RNase H-like domain	0.0166667	0.0133333	0	0.00666667	0.04	0	0.01	0.02	0.02	0	0	0	0	0.02	0	0
Am_Rn_000737	8266	XP_004496318.1_uncharacterized protein LOC101504689 isoform X1 [Cicer arietinum]	AT3G52250.1_Duplicated homeodomain-like superfamily protein	IPR017930_Myb domain; IPR009057_Homeobox-like domain superfamily; IPR001005_SANT/Myb domain	31.15	12.4233	5.09333	7.54	39.06	16.85	37.54	10.84	15.98	10.45	1.19	8.37	5.72	4.06	9.59	8.97
Am_Rn_000738	8265	GAU37771.1_hypothetical protein TSUD_102880 [Trifolium subterraneum]	AT1G53050.1_Protein kinase superfamily protein	IPR026960_Reverse transcriptase zinc-binding domain; IPR012337_Ribonuclease H-like superfamily; IPR000477_Reverse transcriptase domain; IPR002156_Ribonuclease H domain; IPR043502_DNA/RNA polymerase superfamily	3.27	1.27333	0.363333	3.48	3.05	1.92	4.84	1.85	0.92	1.05	0.13	0.35	0.61	8.03	0.73	1.68
Am_Rn_000739	8265	XP_027355255.1_G-type lectin S-receptor-like serine/threonine-protein kinase At4g27290 [Abrus precatorius]	AT4G27290.2_S-locus lectin protein kinase family protein	IPR000858_S-locus glycoprotein domain; IPR003609_PAN/Apple domain; IPR024171_S-receptor-like serine/threonine-protein kinase; IPR011009_Protein kinase-like domain superfamily; IPR036426_Bulb-type lectin domain superfamily; IPR001480_Bulb-type lectin domain; IPR001245_Serine-threonine/tyrosine-protein kinase, catalytic domain; IPR000719_Protein kinase domain; IPR021820_S-locus receptor kinase, C-t…	5.25	0.513333	0.333333	3.17	2.69	7.52	5.54	0.66	0.63	0.25	0.29	0.38	0.33	6.75	1.73	1.03
Am_Rn_000740	8262	XP_027926883.1_uncharacterized protein LOC114183870 isoform X5 [Vigna unguiculata]	AT4G23160.3_cysteine-rich RECEPTOR-like kinase, GeneName=CRK8	IPR012337_Ribonuclease H-like superfamily	0.626667	2.22	1.28333	1.50333	0.99	0.53	0.36	2.65	1.9	2.11	0.73	1.52	1.6	1.31	1.71	1.49
Am_Rn_000741	8260	XP_021279280.1_LOW QUALITY PROTEIN: uncharacterized protein LOC110412945 [Herrania umbratica]	AT4G31500.1_cytochrome P450, family 83, subfamily B, polypeptide 1, GeneName=CYP83B1	IPR019557_Aminotransferase-like, plant mobile domain	0.0766667	6.24	0.0566667	0.0833333	0.08	0.03	0.12	10.67	3.09	4.96	0.03	0.11	0.03	0.17	0.04	0.04
Am_Rn_000742	8258	BAG72151.1_hypothetical protein [Lotus japonicus]	AT2G46380.2_extra-large G-like protein, putative (DUF3133)	IPR016197_Chromo-like domain superfamily; IPR043502_DNA/RNA polymerase superfamily; IPR041588_Integrase zinc-binding domain; IPR000477_Reverse transcriptase domain; IPR012337_Ribonuclease H-like superfamily; IPR041577_Reverse transcriptase/retrotransposon-derived protein, RNase H-like domain; IPR005162_Retrotransposon gag domain	1.16	1.77333	1.2	1.49	0.33	2.07	1.08	1.49	0.98	2.85	1.63	1.12	0.85	1.53	1.35	1.59
Am_Rn_000743	8258	XP_028230335.1_uncharacterized protein LOC114410549 [Glycine soja]	AT4G33150.2_lysine-ketoglutarate reductase/saccharopine dehydrogenase bifunctional enzyme	IPR012337_Ribonuclease H-like superfamily; IPR008906_HAT, C-terminal dimerisation domain	0	0	0	0	0	0	0	0	0	0	0	0	0	0	0	0
Am_Rn_000744	8250	GAU37771.1_hypothetical protein TSUD_102880 [Trifolium subterraneum]	AT5G03220.1_Mediator complex, subunit Med7	IPR026960_Reverse transcriptase zinc-binding domain	5.73333	17.46	10.5467	9.4	4.77	7.73	4.7	12.97	19	20.41	4.15	13.73	13.76	6.22	10.44	11.54
Am_Rn_000745	8247	XP_020217117.1_serine/threonine-protein kinase TOR [Cajanus cajan]	AT1G50030.1_target of rapamycin, GeneName=TOR	IPR016024_Armadillo-type fold; IPR036738_FKBP12-rapamycin binding domain superfamily; IPR000403_Phosphatidylinositol 3-/4-kinase, catalytic domain; IPR003152_FATC domain; IPR003151_PIK-related kinase, FAT; IPR024585_Domain of unknown function DUF3385, target of rapamycin protein; IPR011990_Tetratricopeptide-like helical domain superfamily; IPR011009_Protein kinase-like domain superfamily; IPR0090…	24.4367	31.6133	18.1233	29.53	26.67	26.92	19.72	29.63	35.12	30.09	4.06	25.87	24.44	17.18	33.9	37.51
Am_Rn_000746	8246	XP_004496961.1_cyclase-like protein 2 [Cicer arietinum]	AT4G35220.1_Cyclase family protein	IPR007325_Kynurenine formamidase/cyclase-like; IPR037175_Kynurenine formamidase superfamily	0.916667	0.59	0.823333	0.55	0.33	1.07	1.35	0.52	0.57	0.68	0.23	0.88	1.36	0.37	0.57	0.71
Am_Rn_000747	8246	XP_004490684.1_E3 ubiquitin-protein ligase listerin isoform X1 [Cicer arietinum]	AT5G58410.1_HEAT/U-box domain-containing protein	IPR001841_Zinc finger, RING-type; IPR011016_Zinc finger, RING-CH-type	0.376667	3.75667	0.923333	1.59333	0.44	0	0.69	5.07	2.68	3.52	0	0.89	1.88	2.63	1.05	1.1
Am_Rn_000748	8244	XP_027192481.1_dicer-like protein 4 isoform X2 [Cicer arietinum]	AT5G20320.1_dicer-like 4, GeneName=DCL4	IPR014720_Double-stranded RNA-binding domain; IPR003100_PAZ domain; IPR000999_Ribonuclease III domain; IPR036389_Ribonuclease III, endonuclease domain superfamily; IPR001650_Helicase, C-terminal; IPR027417_P-loop containing nucleoside triphosphate hydrolase	4.83	0.933333	1.47667	2.96667	1.42	11.77	1.3	0.27	1.02	1.51	1.15	2.26	1.02	3.07	3.28	2.55
Am_Rn_000749	8243	XP_004492866.1_putative metallophosphoesterase At3g03305 [Cicer arietinum] XP_027188574.1 putative metallophosphoesterase At3g03305 [Cicer arietinum]	AT3G03305.1_Calcineurin-like metallo-phosphoesterase superfamily protein	IPR004843_Calcineurin-like phosphoesterase domain, ApaH type; IPR029052_Metallo-dependent phosphatase-like	0.00333333	1.52667	0.816667	0.833333	0	0.01	0	1.52	1.66	1.4	0.31	0.64	1.5	0.91	0.98	0.61
Am_Rn_000750	8242	XP_045824224.1_uncharacterized protein LOC123916741 [Trifolium pratense] PNX80886.1 hypothetical protein L195_g036898 [Trifolium pratense]	AT5G52010.1_C2H2-like zinc finger protein	IPR036236_Zinc finger C2H2 superfamily; IPR013087_Zinc finger C2H2-type	0	0.303333	0.656667	0.263333	0	0	0	0	0.91	0	1.97	0	0	0	0	0.79
Am_Rn_000751	8241	XP_004488455.1_callose synthase 2-like isoform X1 [Cicer arietinum] XP_012575485.1 callose synthase 2-like isoform X1 [Cicer arietinum] XP_012575486.1 callose synthase 2-like isoform X1 [Cicer arietinum]	AT2G31960.2_glucan synthase-like 3, GeneName=GSL03	IPR003440_Glycosyl transferase, family 48; IPR026899_1,3-beta-glucan synthase subunit FKS1-like, domain-1; IPR039431_Vta1/callose synthase, N-terminal	0.416667	0.55	0.656667	1.94	0.37	0.56	0.32	0.71	0.64	0.3	0.67	0.85	0.45	2.47	1.65	1.7
Am_Rn_000752	8239	XP_004509208.1_uncharacterized protein LOC101497795 [Cicer arietinum]	AT3G50370.2_hypothetical protein	.	0	0	0.0966667	0.13	0	0	0	0	0	0	0	0	0.29	0	0.39	0
Am_Rn_000753	8239	PNX95999.1_UDP-glycosyltransferase 74B1-like protein [Trifolium pratense]	AT1G24100.1_UDP-glucosyl transferase 74B1, GeneName=UGT74B1	IPR001611_Leucine-rich repeat	4.96333	0.21	0.613333	0.246667	1.23	1.67	11.99	0	0.37	0.26	0.6	0.06	1.18	0.3	0.3	0.14
Am_Rn_000754	8237	PNY07956.1_ATP-dependent RNA helicase dhx29-like protein [Trifolium pratense]	AT1G58060.1_RNA helicase family protein	.	1.25667	0.243333	0.263333	0.323333	2.04	0.63	1.1	0.13	0.35	0.25	0.08	0.42	0.29	0.4	0.41	0.16
Am_Rn_000755	8236	KYP68417.1_Retrovirus-related Pol polyprotein from transposon TNT 1-94, partial [Cajanus cajan]	AT1G58250.1_HYPERSENSITIVE TO PI STARVATION 4, GeneName=SAB	IPR013103_Reverse transcriptase, RNA-dependent DNA polymerase	0	0.0266667	0.06	0.133333	0	0	0	0.08	0	0	0.04	0.05	0.09	0.12	0.12	0.16
Am_Rn_000756	8229	XP_027337807.1_CCR4-NOT transcription complex subunit 1 [Abrus precatorius]	AT1G02080.2_transcription regulator	IPR007196_CCR4-Not complex component, Not1, C-terminal; IPR032193_CCR4-NOT transcription complex subunit 1, TTP binding domain; IPR032194_CCR4-NOT transcription complex subunit 1, HEAT repeat; IPR024557_CCR4-NOT transcription complex subunit 1, domain 4; IPR032191_CCR4-NOT transcription complex subunit 1, CAF1-binding domain	34.04	30.7633	19.8367	29.7367	40.96	35.46	25.7	27.86	34.32	30.11	7.59	26.36	25.56	19.71	28.73	40.77
Am_Rn_000757	8229	XP_004486961.1_xanthine dehydrogenase 1-like [Cicer arietinum]	AT4G34890.1_xanthine dehydrogenase 1, GeneName=XDH1	IPR005107_CO dehydrogenase flavoprotein, C-terminal; IPR036683_CO dehydrogenase flavoprotein, C-terminal domain superfamily; IPR000674_Aldehyde oxidase/xanthine dehydrogenase, a/b hammerhead; IPR002346_Molybdopterin dehydrogenase, FAD-binding; IPR002888_[2Fe-2S]-binding; IPR037165_Aldehyde oxidase/xanthine dehydrogenase, molybdopterin binding domain superfamily; IPR036318_FAD-binding, type PCMH-l…	1.31667	4.03333	2.83	3.29	0.83	2.44	0.68	3.54	4.42	4.14	1.03	3.62	3.84	4.29	3.5	2.08
Am_Rn_000758	8229	GAU13153.1_hypothetical protein TSUD_112140, partial [Trifolium subterraneum]	AT5G23390.1_polygalacturonase inhibitor (DUF639)	IPR012337_Ribonuclease H-like superfamily; IPR023780_Chromo domain; IPR041588_Integrase zinc-binding domain; IPR000953_Chromo/chromo shadow domain; IPR016197_Chromo-like domain superfamily	0.696667	1.03333	1.05333	1.1	1.33	0.27	0.49	0.9	1.41	0.79	0.67	1.33	1.16	0.97	1.07	1.26
Am_Rn_000759	8227	XP_045809014.1_protein CHROMATIN REMODELING 20 [Trifolium pratense]	AT1G08600.3_P-loop containing nucleoside triphosphate hydrolases superfamily protein, GeneName=ATRX	IPR001650_Helicase, C-terminal; IPR000330_SNF2, N-terminal; IPR027417_P-loop containing nucleoside triphosphate hydrolase; IPR014001_Helicase superfamily 1/2, ATP-binding domain	7.78	5.93	4.78333	6.69	10.77	7.36	5.21	4.95	7.2	5.64	1.39	6.34	6.62	3.83	7.67	8.57
Am_Rn_000760	8220	XP_045813221.1_uncharacterized protein LOC123907154 isoform X2 [Trifolium pratense]	AT2G03140.3_alpha/beta-Hydrolases superfamily protein	IPR029058_Alpha/Beta hydrolase fold	4.62667	11.2133	7.65333	8.29333	5.86	4.47	3.55	15.11	8.13	10.4	3.81	8.2	10.95	7.21	7.34	10.33
Am_Rn_000761	8214	XP_045810455.1_uncharacterized protein LOC123904892 [Trifolium pratense]	AT1G11480.1_eukaryotic translation initiation factor-like protein	IPR000477_Reverse transcriptase domain; IPR043502_DNA/RNA polymerase superfamily; IPR036691_Endonuclease/exonuclease/phosphatase superfamily	1.23333	3.07667	1.95333	2.16667	1.09	1.04	1.57	3.43	3.25	2.55	0.69	2.74	2.43	2.07	2.25	2.18
Am_Rn_000762	8210	XP_004499218.1_lysine-specific histone demethylase 1 homolog 3 isoform X1 [Cicer arietinum] XP_004499221.1 lysine-specific histone demethylase 1 homolog 3 isoform X1 [Cicer arietinum] XP_012570825.1 lysine-specific histone demethylase 1 homolog 3 isoform X1 [Cicer arietinum] XP_027189607.1 lysine-specific histone demethylase 1 homolog 3 isoform X1 [Cicer arietinum]	AT4G16310.3_LSD1-like 3, GeneName=LDL3	IPR036188_FAD/NAD(P)-binding domain superfamily; IPR007526_SWIRM domain; IPR035441_TFIIS/LEDGF domain superfamily; IPR002937_Amine oxidase; IPR009057_Homeobox-like domain superfamily	1.77667	3.31333	2.11333	3.49667	1.46	2.23	1.64	3.94	2.86	3.14	1.84	2.64	1.86	3.06	3.83	3.6
Am_Rn_000763	8209	XP_004514064.1_uncharacterized protein LOC101492288 isoform X1 [Cicer arietinum]	AT3G46920.1_kinase superfamily with octicosapeptide/Phox/Bem1p domain-containing protein	IPR000270_PB1 domain; IPR001245_Serine-threonine/tyrosine-protein kinase, catalytic domain; IPR000719_Protein kinase domain; IPR011009_Protein kinase-like domain superfamily	1	4.2	3.13333	4.44333	1.18	1.4	0.42	3.27	4.6	4.73	1.17	4.47	3.76	3.25	3.99	6.09
Am_Rn_000764	8208	GAU30089.1_hypothetical protein TSUD_392450 [Trifolium subterraneum]	AT2G25530.1_AFG1-like ATPase family protein	IPR012337_Ribonuclease H-like superfamily; IPR016197_Chromo-like domain superfamily; IPR000477_Reverse transcriptase domain; IPR005162_Retrotransposon gag domain; IPR043502_DNA/RNA polymerase superfamily; IPR041577_Reverse transcriptase/retrotransposon-derived protein, RNase H-like domain; IPR041588_Integrase zinc-binding domain; IPR021109_Aspartic peptidase domain superfamily	0.773333	1.06	1.01333	0.45	0.7	0.69	0.93	0.53	1.22	1.43	0.07	1.44	1.53	0.34	0.37	0.64
Am_Rn_000765	8208	POE76842.1_putative metal-nicotianamine transporter ysl7 [Quercus suber]	AT1G48370.2_YELLOW STRIPE like 8, GeneName=YSL8	IPR002885_Pentatricopeptide repeat	0.18	1.08667	0.9	1.50667	0.26	0.24	0.04	0.84	1.68	0.74	0.27	1.18	1.25	1.42	1.64	1.46
Am_Rn_000766	8205	RDY09343.1_Auxilin-like protein 1, partial [Mucuna pruriens]	AT4G36520.1_Chaperone DnaJ-domain superfamily protein	.	0.0266667	0	0	0.186667	0.08	0	0	0	0	0	0	0	0	0.25	0.14	0.17
Am_Rn_000767	8203	GAU44417.1_hypothetical protein TSUD_100640 [Trifolium subterraneum]	AT4G23160.3_cysteine-rich RECEPTOR-like kinase, GeneName=CRK8	IPR036875_Zinc finger, CCHC-type superfamily; IPR001584_Integrase, catalytic core; IPR012337_Ribonuclease H-like superfamily; IPR025724_GAG-pre-integrase domain; IPR001878_Zinc finger, CCHC-type	0.0933333	4.74333	0.0566667	0.22	0.03	0.02	0.23	6.89	3.58	3.76	0	0.15	0.02	0.15	0.24	0.27
Am_Rn_000768	8202	XP_004496667.1_protein GFS12 [Cicer arietinum]	AT5G18525.1_protein serine/threonine kinase	IPR036372_BEACH domain superfamily; IPR000409_BEACH domain; IPR001680_WD40 repeat; IPR011009_Protein kinase-like domain superfamily; IPR036322_WD40-repeat-containing domain superfamily	0.303333	0.336667	0.696667	0.16	0.4	0.19	0.32	0.29	0.47	0.25	0	0.99	1.1	0	0.44	0.04
Am_Rn_000769	8201	XP_004511695.1_uncharacterized protein LOC101504440 isoform X2 [Cicer arietinum]	AT4G17330.3_G2484-1 protein, GeneName=G2484-1	IPR014002_Agenet domain, plant type; IPR008395_Agenet-like domain	3.54333	1.35333	0.526667	0.49	7.77	2.47	0.39	1.41	1.33	1.32	0	0.58	1	0	0.51	0.96
Am_Rn_000770	8200	PNY02735.1_retrotransposon-related protein [Trifolium pratense]	AT1G27980.1_dihydrosphingosine phosphate lyase, GeneName=DPL1	IPR012337_Ribonuclease H-like superfamily	0.83	0.0833333	0.203333	0.533333	0.17	0	2.32	0.12	0.08	0.05	0.29	0.07	0.25	0.12	0.51	0.97
Am_Rn_000771	8200	XP_004505684.1_uncharacterized protein LOC101490411 isoform X1 [Cicer arietinum] XP_012572708.1 uncharacterized protein LOC101490411 isoform X1 [Cicer arietinum] XP_027191168.1 uncharacterized protein LOC101490411 isoform X1 [Cicer arietinum]	AT4G30150.2_Urb2/Npa2 family protein	IPR018849_Nucleolar 27S pre-rRNA processing, Urb2/Npa2, C-terminal	8.41333	6.40333	1.87333	7.90667	13.99	7.01	4.24	6.66	6.8	5.75	0	3.01	2.61	6.47	8.66	8.59
Am_Rn_000772	8191	XP_039686010.1_inositol transporter 1-like [Medicago truncatula]	AT2G43330.1_inositol transporter 1, GeneName=INT1	IPR036259_MFS transporter superfamily; IPR003663_Sugar/inositol transporter; IPR005828_Major facilitator, sugar transporter-like	0.433333	0	0	0.383333	0.67	0.63	0	0	0	0	0	0	0	0.12	0.73	0.3
Am_Rn_000773	8191	XP_027192667.1_uncharacterized protein LOC101510858 [Cicer arietinum]	AT3G48170.1_aldehyde dehydrogenase 10A9, GeneName=ALDH10A9	IPR005162_Retrotransposon gag domain; IPR000467_G-patch domain; IPR021109_Aspartic peptidase domain superfamily	0.25	1.73	0.54	0.966667	0.26	0.32	0.17	1.58	1.81	1.8	0.28	0.87	0.47	1.24	0.95	0.71
Am_Rn_000774	8190	KHN21230.1_Retrovirus-related Pol polyprotein from transposon TNT 1-94, partial [Glycine soja]	AT2G37660.1_NAD(P)-binding Rossmann-fold superfamily protein	.	0.04	0.653333	0.75	1.07333	0	0.11	0.01	0.6	0.53	0.83	0.32	0.77	1.16	0.74	0.99	1.49
Am_Rn_000775	8183	.	.	.	0.536667	0.226667	0.183333	0.426667	0.88	0.45	0.28	0.26	0.2	0.22	0.06	0.24	0.25	0.22	0.45	0.61
Am_Rn_000776	8181	PNY00055.1_Ty3/gypsy retrotransposon protein [Trifolium pratense]	ATMG00860.1_DNA/RNA polymerases superfamily protein, GeneName=ORF158	IPR000477_Reverse transcriptase domain; IPR041577_Reverse transcriptase/retrotransposon-derived protein, RNase H-like domain; IPR043502_DNA/RNA polymerase superfamily	1.35	0.223333	0.236667	0.703333	0.47	1.74	1.84	0.29	0.17	0.21	0.06	0.39	0.26	0.94	0.8	0.37
Am_Rn_000777	8180	XP_004500064.1_uncharacterized protein LOC101510812 [Cicer arietinum]	AT4G27010.2_ribosome 60S biogenesis amino-terminal protein, GeneName=EMB2788	IPR032436_Nucleolar pre-ribosomal-associated protein 1, C-terminal domain; IPR021714_Nucleolar pre-ribosomal-associated protein 1, N-terminal	16.61	10.46	5.98	10.1067	25.38	11.83	12.62	10.71	9.91	10.76	3.71	6.94	7.29	8.93	9.43	11.96
Am_Rn_000778	8180	PNY16580.1_ribonuclease H, partial [Trifolium pratense]	ATMG00860.1_DNA/RNA polymerases superfamily protein, GeneName=ORF158	.	0.04	0.0333333	0.01	0.106667	0.04	0.03	0.05	0.07	0.02	0.01	0	0	0.03	0.19	0.13	0
Am_Rn_000779	8173	GAU18816.1_hypothetical protein TSUD_81050 [Trifolium subterraneum]	AT4G23160.3_cysteine-rich RECEPTOR-like kinase, GeneName=CRK8	IPR036875_Zinc finger, CCHC-type superfamily; IPR025724_GAG-pre-integrase domain; IPR001878_Zinc finger, CCHC-type	0.5	1.40667	0.976667	1.71667	0.27	0.98	0.25	1.73	1.41	1.08	0.61	1.23	1.09	2.28	1.29	1.58
Am_Rn_000780	8168	XP_045806965.1_pre-mRNA-processing-splicing factor 8A isoform X2 [Trifolium pratense]	AT1G80070.1_Pre-mRNA-processing-splicing factor, GeneName=SUS2	IPR012591_PRO8NT domain; IPR012592_PROCN domain	0	0.04	0.133333	0.24	0	0	0	0	0	0.12	0.18	0	0.22	0.23	0	0.49
Am_Rn_000781	8167	AML77294.1_putative LOV domain-containing protein [Astragalus membranaceus] AML77933.1 putative LOV domain-containing protein [Astragalus propinquus]	AT5G57360.1_Galactose oxidase/kelch repeat superfamily protein, GeneName=ZTL	IPR001584_Integrase, catalytic core; IPR013103_Reverse transcriptase, RNA-dependent DNA polymerase; IPR025724_GAG-pre-integrase domain; IPR012337_Ribonuclease H-like superfamily; IPR043502_DNA/RNA polymerase superfamily	0.47	0.42	0.37	0.24	0.93	0.19	0.29	0.58	0.21	0.47	0.21	0.29	0.61	0.31	0.18	0.23
Am_Rn_000782	8166	XP_004506226.1_serine/threonine-protein phosphatase BSL3 [Cicer arietinum] XP_004506227.1 serine/threonine-protein phosphatase BSL3 [Cicer arietinum] XP_012572830.1 serine/threonine-protein phosphatase BSL3 [Cicer arietinum]	AT2G27210.1_BRI1 suppressor 1 (BSU1)-like 3, GeneName=BSL3	IPR029052_Metallo-dependent phosphatase-like; IPR006186_Serine/threonine-specific protein phosphatase/bis(5-nucleosyl)-tetraphosphatase; IPR004843_Calcineurin-like phosphoesterase domain, ApaH type	0.116667	0.303333	0.22	0.256667	0	0.25	0.1	0.22	0.45	0.24	0.16	0.26	0.24	0.29	0.31	0.17
Am_Rn_000783	8164	XP_004490690.1_protein FAR1-RELATED SEQUENCE 5-like [Cicer arietinum]	AT4G15090.2_FRS (FAR1 Related Sequences) transcription factor family, GeneName=FAR1	IPR004330_FAR1 DNA binding domain; IPR018289_MULE transposase domain; IPR006564_Zinc finger, PMZ-type; IPR007527_Zinc finger, SWIM-type	0	0.94	0.713333	0.386667	0	0	0	1.26	0.71	0.85	0.43	0.99	0.72	0.14	0.54	0.48
Am_Rn_000784	8164	KYP78810.1_Copia protein, partial [Cajanus cajan]	.	.	0.58	1.37667	0.85	1.09	0.85	0.64	0.25	1.64	0.91	1.58	0.27	0.94	1.34	1.13	1.23	0.91
Am_Rn_000785	8157	XP_004509208.1_uncharacterized protein LOC101497795 [Cicer arietinum]	AT3G50370.2_hypothetical protein	.	0.203333	0	0.02	0.03	0	0.37	0.24	0	0	0	0	0	0.06	0	0	0.09
Am_Rn_000786	8156	XP_012570366.1_protein ROS1-like [Cicer arietinum]	AT2G36490.1_demeter-like 1, GeneName=DML1	IPR028925_Demeter, RRM-fold domain; IPR028924_Permuted single zf-CXXC unit	0.18	0.14	0.316667	0.303333	0.12	0.33	0.09	0	0.2	0.22	0.23	0.28	0.44	0.1	0.23	0.58
Am_Rn_000787	8155	XP_012575158.1_glutamate receptor 2.9-like isoform X1 [Cicer arietinum]	AT2G29100.1_glutamate receptor 2.9, GeneName=GLR2.9	IPR001320_Ionotropic glutamate receptor; IPR028082_Periplasmic binding protein-like I; IPR001828_Receptor, ligand binding region; IPR001638_Solute-binding protein family 3/N-terminal domain of MltF	0	3.23	4.71333	8.67333	0	0	0	2.42	4.92	2.35	3.16	4.54	6.44	3.47	16.62	5.93
Am_Rn_000788	8152	XP_027364997.1_uncharacterized protein LOC113872028 [Abrus precatorius]	AT2G36380.1_pleiotropic drug resistance 6, GeneName=ABCG34	IPR005380_XS domain	5.21	2.19	1.80333	1.04667	9.43	0.99	5.21	2.5	2.12	1.95	2.56	1.5	1.35	1.05	1.34	0.75
Am_Rn_000789	8149	KYP41234.1_Retrovirus-related Pol polyprotein from transposon TNT 1-94 [Cajanus cajan]	AT4G23160.3_cysteine-rich RECEPTOR-like kinase, GeneName=CRK8	IPR001584_Integrase, catalytic core; IPR025724_GAG-pre-integrase domain; IPR012337_Ribonuclease H-like superfamily	0.126667	0.0933333	0.123333	0	0.15	0	0.23	0	0.28	0	0.04	0	0.33	0	0	0
Am_Rn_000790	8148	GAU44417.1_hypothetical protein TSUD_100640 [Trifolium subterraneum]	AT4G23160.3_cysteine-rich RECEPTOR-like kinase, GeneName=CRK8	IPR012337_Ribonuclease H-like superfamily; IPR036875_Zinc finger, CCHC-type superfamily; IPR025724_GAG-pre-integrase domain	2.51667	5.36667	1.94	2.69333	0.26	1.57	5.72	5.6	7.11	3.39	1.29	2.68	1.85	3.17	4.05	0.86
Am_Rn_000791	8144	XP_004514820.1_DNA repair protein UVH3 isoform X1 [Cicer arietinum]	AT3G28030.2_5'-3' exonuclease family protein, GeneName=UVH3	IPR006084_XPG/Rad2 endonuclease; IPR001044_XPG/Rad2 endonuclease, eukaryotes; IPR006086_XPG-I domain; IPR025527_HUWE1/Rev1, ubiquitin binding region; IPR029060_PIN-like domain superfamily; IPR006085_XPG, N-terminal	0.486667	0.763333	0.686667	0.67	0.37	0.73	0.36	0.96	0.92	0.41	0.16	1.27	0.63	0.9	0.62	0.49
Am_Rn_000792	8144	GAU13153.1_hypothetical protein TSUD_112140, partial [Trifolium subterraneum]	AT5G23390.1_polygalacturonase inhibitor (DUF639)	IPR012337_Ribonuclease H-like superfamily; IPR023780_Chromo domain; IPR041588_Integrase zinc-binding domain; IPR000953_Chromo/chromo shadow domain; IPR016197_Chromo-like domain superfamily	0.776667	0.79	1.99	1.83	1.1	1.16	0.07	0.34	1.28	0.75	2.31	2.39	1.27	1.99	1.76	1.74
Am_Rn_000793	8143	XP_027192505.1_LOW QUALITY PROTEIN: midasin [Cicer arietinum]	AT1G67120.1_midasin-like protein	.	2.93	2.65667	1.83333	5.46	5.22	2.99	0.58	2.43	1.94	3.6	1.46	1.65	2.39	5.5	4.09	6.79
Am_Rn_000794	8143	XP_045824196.1_beta-fructofuranosidase, insoluble isoenzyme CWINV6 isoform X1 [Trifolium pratense]	AT5G52010.1_C2H2-like zinc finger protein	IPR036236_Zinc finger C2H2 superfamily; IPR013087_Zinc finger C2H2-type	1.19333	13.42	4.63667	4.16333	0	0	3.58	15.58	8.18	16.5	3.66	5.32	4.93	4.12	2.26	6.11
Am_Rn_000795	8142	AHG28998.1_NBS-LRR protein [Cicer arietinum]	AT5G36930.3_Disease resistance protein (TIR-NBS-LRR class) family	IPR002182_NB-ARC; IPR027417_P-loop containing nucleoside triphosphate hydrolase; IPR036390_Winged helix DNA-binding domain superfamily	8.67333	16.4133	1.76667	15.78	6.19	15.59	4.24	18.42	17.78	13.04	0.1	1.99	3.21	8.89	14.65	23.8
Am_Rn_000796	8140	XP_004487881.1_uncharacterized protein LOC113783882 isoform X1 [Cicer arietinum]	AT5G07900.1_Mitochondrial transcription termination factor family protein	IPR003690_Transcription termination factor, mitochondrial/chloroplastic	0.14	0.84	0.27	0.856667	0	0.42	0	0.47	0.88	1.17	0.57	0	0.24	1.12	0	1.45
Am_Rn_000797	8137	PNY10806.1_histone deacetylase [Trifolium pratense]	AT4G23160.3_cysteine-rich RECEPTOR-like kinase, GeneName=CRK8	IPR013103_Reverse transcriptase, RNA-dependent DNA polymerase; IPR043502_DNA/RNA polymerase superfamily	0.0866667	1.08667	0.273333	0.543333	0.1	0.16	0	1.72	1.54	0	0.08	0.69	0.05	0.6	1.03	0
Am_Rn_000798	8132	KYP38429.1_Retrotransposable element Tf2, partial [Cajanus cajan]	AT2G19450.1_membrane bound O-acyl transferase (MBOAT) family protein, GeneName=TAG1	IPR012337_Ribonuclease H-like superfamily	0.603333	0.82	0.876667	0.73	0.29	0.76	0.76	0.94	0.75	0.77	0.25	1.25	1.13	0.47	0.83	0.89
Am_Rn_000799	8129	XP_004494344.1_uncharacterized protein LOC101503823 isoform X1 [Cicer arietinum] XP_004494345.1 uncharacterized protein LOC101503823 isoform X1 [Cicer arietinum] XP_004494346.1 uncharacterized protein LOC101503823 isoform X1 [Cicer arietinum] XP_012569589.1 uncharacterized protein LOC101503823 isoform X1 [Cicer arietinum]	AT3G62900.2_CW-type Zinc Finger	IPR011124_Zinc finger, CW-type	3.03667	1.32333	0.536667	1.86667	2.84	3.82	2.45	2.99	0.63	0.35	0.35	0.66	0.6	4.4	0.7	0.5
Am_Rn_000800	8126	XP_004487363.1_histone-lysine N-methyltransferase ATXR3-like [Cicer arietinum]	AT4G15180.1_SET domain protein 2, GeneName=SDG2	IPR001214_SET domain; IPR045606_Protein SET DOMAIN GROUP 2, C-terminal; IPR036047_F-box-like domain superfamily	19.5067	32.39	18.91	24.67	15.9	19.46	23.16	30.55	35.6	31.02	10.84	24.49	21.4	21.1	25.05	27.86
Am_Rn_000801	8124	XP_016164673.1_uncharacterized protein LOC107607211 [Arachis ipaensis]	AT5G20090.1_Uncharacterized protein family (UPF0041)	IPR043502_DNA/RNA polymerase superfamily; IPR000477_Reverse transcriptase domain	0.376667	8.08	5.90667	4.27	0.25	0.71	0.17	9.42	8.31	6.51	3.46	7.55	6.71	4.03	4.91	3.87
Am_Rn_000802	8123	AFN88207.1_integrase core domain containing protein [Phaseolus vulgaris]	AT1G79070.1_SNARE-associated protein-like protein	.	0.666667	0.76	0.673333	0.71	0.66	1.15	0.19	0.4	1.13	0.75	0.27	1.14	0.61	0.43	0.89	0.81
Am_Rn_000803	8122	XP_020216699.1_PKS-NRPS hybrid synthetase CHGG_01239 [Cajanus cajan]	AT4G00315.1_F-box/RNI-like/FBD-like domains-containing protein	IPR018289_MULE transposase domain	0.173333	1.22667	0.513333	1.24667	0.04	0.37	0.11	0.69	1.78	1.21	0.27	0.7	0.57	0.95	1.55	1.24
Am_Rn_000804	8103	XP_004511695.1_uncharacterized protein LOC101504440 isoform X2 [Cicer arietinum]	AT4G17330.3_G2484-1 protein, GeneName=G2484-1	IPR008395_Agenet-like domain	0.72	0.16	1.39333	0.493333	0	0.66	1.5	0	0	0.48	4.18	0	0	0.41	0	1.07
Am_Rn_000805	8100	XP_045833187.1_5&apos;-3&apos; exoribonuclease 3-like isoform X2 [Trifolium pratense]	AT1G75660.1_5'-3' exoribonuclease 3, GeneName=XRN3	IPR004859_Putative 5-3 exonuclease; IPR017151_5'-3' exoribonuclease type 2; IPR041412_Xrn1, helical domain	1.12667	0.676667	0.423333	0.76	2.17	1.21	0	0.98	1.05	0	0.72	0.55	0	1.38	0.9	0
Am_Rn_000806	8097	XP_045825189.1_DExH-box ATP-dependent RNA helicase DExH14 isoform X2 [Trifolium pratense]	AT5G61140.2_U5 small nuclear ribonucleoprotein helicase	IPR001650_Helicase, C-terminal; IPR004179_Sec63 domain; IPR011545_DEAD/DEAH box helicase domain; IPR027417_P-loop containing nucleoside triphosphate hydrolase; IPR036390_Winged helix DNA-binding domain superfamily; IPR014001_Helicase superfamily 1/2, ATP-binding domain; IPR014756_Immunoglobulin E-set	1.18667	2.74667	2.13333	2.07333	0.93	2.13	0.5	3.33	2.14	2.77	0.59	2.06	3.75	0.89	1.48	3.85
Am_Rn_000807	8093	XP_027193391.1_uncharacterized protein LOC101496163 [Cicer arietinum]	AT1G63490.4_transcription factor jumonji (jmjC) domain-containing protein	IPR003347_JmjC domain; IPR011011_Zinc finger, FYVE/PHD-type; IPR001965_Zinc finger, PHD-type; IPR036431_ARID DNA-binding domain superfamily; IPR001606_ARID DNA-binding domain; IPR003349_JmjN domain; IPR004198_Zinc finger, C5HC2-type; IPR019787_Zinc finger, PHD-finger	0.0833333	0.07	0.0666667	0.273333	0	0	0.25	0	0	0.21	0	0.12	0.08	0.18	0	0.64
Am_Rn_000808	8091	XP_045794840.1_protein LATE ELONGATED HYPOCOTYL isoform X1 [Trifolium pratense] XP_045794841.1 protein LATE ELONGATED HYPOCOTYL isoform X1 [Trifolium pratense] XP_045794842.1 protein LATE ELONGATED HYPOCOTYL isoform X1 [Trifolium pratense] XP_045794843.1 protein LATE ELONGATED HYPOCOTYL isoform X1 [Trifolium pratense] XP_045794844.1 protein LATE ELONGATED HYPOCOTYL isoform X1 [Trifolium pratense]	AT1G01060.6_Homeodomain-like superfamily protein, GeneName=LHY	.	0.403333	5.72667	3.86	2.16	0.68	0.35	0.18	6.5	6.5	4.18	5	3.32	3.26	2.81	2.29	1.38
Am_Rn_000809	8091	PNY03339.1_retrotransposon-related protein, partial [Trifolium pratense]	AT4G10570.1_ubiquitin-specific protease 9, GeneName=UBP9	IPR000477_Reverse transcriptase domain; IPR021109_Aspartic peptidase domain superfamily; IPR043502_DNA/RNA polymerase superfamily	0.11	0.203333	0.233333	0.223333	0.12	0.05	0.16	0.16	0.25	0.2	0.13	0.21	0.36	0.18	0.22	0.27
Am_Rn_000810	8090	XP_013469315.1_uncharacterized protein LOC25484854 isoform X1 [Medicago truncatula] KEH43353.1 UDP-glycosyltransferase family protein [Medicago truncatula] RHN81311.1 putative glycosyl transferase, family 1 [Medicago truncatula]	AT5G04480.2_UDP-Glycosyltransferase superfamily protein	.	0.75	0	0.09	0.05	0	0.4	1.85	0	0	0	0.06	0.11	0.1	0.08	0	0.07
Am_Rn_000811	8090	KAH1211494.1_hypothetical protein GmHk_14G039928 [Glycine max]	AT1G56240.1_phloem protein 2-B13, GeneName=PP2-B13	IPR005162_Retrotransposon gag domain	0.723333	0.23	0.31	0.12	1.12	0.61	0.44	0.41	0.12	0.16	0.27	0.32	0.34	0.2	0.09	0.07
Am_Rn_000812	8089	XP_006591464.1_4-methyl-5-nitrocatechol 5-monooxygenase isoform X2 [Glycine max] XP_028197721.1 uncharacterized protein LOC114382473 isoform X1 [Glycine soja] KAH1160720.1 hypothetical protein GYH30_032145 [Glycine max] KAH1226865.1 putative polyketide hydroxylase [Glycine max] KRH31438.1 hypothetical protein GLYMA_11G248400v4 [Glycine max] RZB73303.1 putative polyketide hydroxylase isoform A [Gl…	AT1G24340.1_FAD/NAD(P)-binding oxidoreductase family protein, GeneName=EMB2421	IPR002938_FAD-binding domain; IPR036188_FAD/NAD(P)-binding domain superfamily	1.00333	2.24	1.58333	0.98	0	1.66	1.35	2.78	2.18	1.76	0.84	1.02	2.89	1.53	0.78	0.63
Am_Rn_000813	8089	KAG5068175.1_hypothetical protein JHK85_000552 [Glycine max] KAH1161760.1 hypothetical protein GYH30_000570 [Glycine max] KRH74980.1 hypothetical protein GLYMA_01G054700v4 [Glycine max]	AT1G19260.1_TTF-type zinc finger protein with HAT dimerization domain-containing protein	IPR012337_Ribonuclease H-like superfamily	0.0833333	0.916667	0.6	0.75	0.09	0.16	0	0.55	1.4	0.8	0.21	0.75	0.84	0.93	0.79	0.53
Am_Rn_000814	8088	XP_045797971.1_uncharacterized protein LOC123892199 [Trifolium pratense]	AT2G20180.1_phytochrome interacting factor 3-like 5, GeneName=PIL5	IPR002110_Ankyrin repeat; IPR026961_PGG domain; IPR036770_Ankyrin repeat-containing domain superfamily	0.0166667	0.916667	0.133333	0.326667	0	0	0.05	1.27	0.92	0.56	0	0.07	0.33	0.48	0.41	0.09
Am_Rn_000815	8086	XP_014622155.1_uncharacterized protein LOC100818989 [Glycine max]	AT1G50830.1_Aminotransferase-like, plant mobile domain family protein	IPR012337_Ribonuclease H-like superfamily; IPR041577_Reverse transcriptase/retrotransposon-derived protein, RNase H-like domain; IPR043502_DNA/RNA polymerase superfamily; IPR041588_Integrase zinc-binding domain; IPR002156_Ribonuclease H domain	0.336667	0.303333	0.476667	0.336667	0.51	0.27	0.23	0.69	0	0.22	0	0.88	0.55	0.16	0.47	0.38
Am_Rn_000816	8084	PRQ52345.1_putative RNA-directed DNA polymerase [Rosa chinensis]	AT4G23160.3_cysteine-rich RECEPTOR-like kinase, GeneName=CRK8	IPR013103_Reverse transcriptase, RNA-dependent DNA polymerase; IPR043502_DNA/RNA polymerase superfamily	1.94333	0.84	0.386667	0.28	2.37	1.18	2.28	0.7	0.42	1.4	0.26	0.59	0.31	0.32	0.52	0
Am_Rn_000817	8079	XP_045833187.1_5&apos;-3&apos; exoribonuclease 3-like isoform X2 [Trifolium pratense]	AT1G75660.1_5'-3' exoribonuclease 3, GeneName=XRN3	IPR017151_5'-3' exoribonuclease type 2; IPR041412_Xrn1, helical domain; IPR004859_Putative 5-3 exonuclease	8.99333	4.76667	6.49667	10.5667	12.97	8.01	6	3.89	5.6	4.81	5.26	8.51	5.72	10.02	10.81	10.87
Am_Rn_000818	8078	BAG72150.1_hypothetical protein [Lotus japonicus]	AT1G73170.2_P-loop containing nucleoside triphosphate hydrolases superfamily protein	IPR000477_Reverse transcriptase domain; IPR041577_Reverse transcriptase/retrotransposon-derived protein, RNase H-like domain; IPR041588_Integrase zinc-binding domain; IPR012337_Ribonuclease H-like superfamily; IPR043502_DNA/RNA polymerase superfamily	0.573333	0.363333	0.253333	0.42	0.51	0.77	0.44	0.4	0.26	0.43	0.13	0.32	0.31	0.75	0.26	0.25
Am_Rn_000819	8077	BAG72151.1_hypothetical protein [Lotus japonicus]	ATMG00860.1_DNA/RNA polymerases superfamily protein, GeneName=ORF158	IPR021109_Aspartic peptidase domain superfamily; IPR016197_Chromo-like domain superfamily; IPR012337_Ribonuclease H-like superfamily; IPR041588_Integrase zinc-binding domain; IPR043502_DNA/RNA polymerase superfamily; IPR041577_Reverse transcriptase/retrotransposon-derived protein, RNase H-like domain; IPR023780_Chromo domain; IPR000477_Reverse transcriptase domain	0.0133333	0.0166667	0.0266667	0.0666667	0	0.04	0	0	0.05	0	0	0.08	0	0	0.2	0
Am_Rn_000820	8075	XP_004510876.1_two-component response regulator ARR14 isoform X2 [Cicer arietinum]	AT3G62670.1_two-component response regulator, GeneName=RR20	IPR006447_Myb domain, plants; IPR009057_Homeobox-like domain superfamily	0.29	0	2.36333	3.32667	0.06	0.77	0.04	0	0	0	0.67	3.19	3.23	1.41	3.71	4.86
Am_Rn_000821	8073	RHN53444.1_putative RNA-directed DNA polymerase [Medicago truncatula]	ATMG00810.1_DNA/RNA polymerases superfamily protein, GeneName=ORF240B	.	0.903333	2.52667	1.37333	1.7	1.18	0.88	0.65	2.31	1.85	3.42	1.54	1.25	1.33	1.16	2.12	1.82
Am_Rn_000822	8072	XP_004509208.1_uncharacterized protein LOC101497795 [Cicer arietinum]	AT3G50370.2_hypothetical protein	.	83.4567	58.0267	39.2	61.8133	116.27	69.71	64.39	57.74	60.17	56.17	18.28	52.18	47.14	48.51	64.35	72.58
Am_Rn_000823	8069	XP_045806965.1_pre-mRNA-processing-splicing factor 8A isoform X2 [Trifolium pratense]	AT1G80070.1_Pre-mRNA-processing-splicing factor, GeneName=SUS2	IPR012591_PRO8NT domain; IPR019582_RNA recognition motif, spliceosomal PrP8; IPR019580_Pre-mRNA-processing-splicing factor 8, U6-snRNA-binding; IPR012592_PROCN domain; IPR012337_Ribonuclease H-like superfamily; IPR021983_PRP8 domain IV core; IPR019581_Pre-mRNA-processing-splicing factor 8, U5-snRNA-binding	0.7	0.436667	1.03667	0.46	0.91	0.41	0.78	0.22	0.72	0.37	1.15	0.38	1.58	0	0.85	0.53
Am_Rn_000824	8068	XP_004499551.1_uncharacterized protein LOC101494281 [Cicer arietinum]	AT1G17450.2_B-block binding subunit of TFIIIC	IPR036390_Winged helix DNA-binding domain superfamily; IPR007309_B-block binding subunit of TFIIIC	0.0833333	0.66	0.35	0.673333	0.08	0.04	0.13	0.58	0.86	0.54	0.18	0.5	0.37	0.57	1.05	0.4
Am_Rn_000825	8068	RZB75684.1_Retrovirus-related Pol polyprotein from transposon TNT 1-94 [Glycine soja]	AT2G01440.1_DEAD/DEAH box RNA helicase family protein	IPR025724_GAG-pre-integrase domain; IPR012337_Ribonuclease H-like superfamily	0.163333	0.146667	0.113333	0.31	0.05	0.38	0.06	0.44	0	0	0	0.34	0	0.22	0.22	0.49
Am_Rn_000826	8067	KAG4995227.1_hypothetical protein JHK86_032054 [Glycine max] KAG5125220.1 hypothetical protein JHK82_031957 [Glycine max] KAG5146645.1 hypothetical protein JHK84_032188 [Glycine max]	.	.	0.153333	0.203333	0.396667	0.283333	0.14	0.22	0.1	0.19	0.36	0.06	0	0.79	0.4	0.25	0	0.6
Am_Rn_000827	8064	XP_027351379.1_wall-associated receptor kinase-like 1 [Abrus precatorius]	AT1G16130.1_wall associated kinase-like 2, GeneName=WAKL2	IPR000719_Protein kinase domain; IPR011009_Protein kinase-like domain superfamily	0.11	0.85	0.54	0.683333	0.11	0.18	0.04	0.83	0.99	0.73	0.17	0.85	0.6	0.66	0.95	0.44
Am_Rn_000828	8062	PNX92852.1_hypothetical protein L195_g015995, partial [Trifolium pratense]	AT2G36910.1_ATP binding cassette subfamily B1, GeneName=ABCB1	.	2.71	1.4	0.886667	0.84	6.01	0.8	1.32	1.61	1.39	1.2	1.2	0.8	0.66	0.86	1.24	0.42
Am_Rn_000829	8061	KAH1191045.1_Protein GFS12 [Glycine max]	AT5G18525.1_protein serine/threonine kinase	IPR036322_WD40-repeat-containing domain superfamily	0.4	0.31	0.52	0.296667	0.31	0.49	0.4	0.28	0.41	0.24	0.39	0.6	0.57	0.48	0.2	0.21
Am_Rn_000830	8061	XP_027361258.1_histone-lysine N-methyltransferase SUVR5-like isoform X1 [Abrus precatorius]	AT2G23740.3_histone-lysine N-methyltransferase SUVR5, GeneName=SUVR5	IPR013087_Zinc finger C2H2-type; IPR040689_SUVR5, C2H2-type Zinc finger, 3 repeats; IPR001214_SET domain; IPR007728_Pre-SET domain	0.63	1.01333	0.673333	1.26667	0.72	0.85	0.32	1.32	0.83	0.89	0.46	0.82	0.74	0.9	1.24	1.66
Am_Rn_000831	8060	KEH40352.1_stress-induced receptor-like kinase [Medicago truncatula]	AT1G66910.2_Protein kinase superfamily protein	IPR011009_Protein kinase-like domain superfamily; IPR025287_Wall-associated receptor kinase, galacturonan-binding domain; IPR000719_Protein kinase domain	0	0.43	0.13	0.103333	0	0	0	0.67	0.62	0	0.09	0.3	0	0.19	0.12	0
Am_Rn_000832	8059	TKY73152.1_TSS protein [Spatholobus suberectus]	AT4G28080.1_Tetratricopeptide repeat (TPR)-like superfamily protein	IPR033646_CLU central domain; IPR028275_Clustered mitochondria protein, N-terminal; IPR011990_Tetratricopeptide-like helical domain superfamily; IPR019734_Tetratricopeptide repeat	0.06	1.45	0.636667	0.246667	0	0.07	0.11	1.12	1.36	1.87	0.49	0.65	0.77	0.29	0.26	0.19
Am_Rn_000833	8058	XP_027363777.1_uncharacterized protein LOC113871145 [Abrus precatorius] XP_027363778.1 uncharacterized protein LOC113871145 [Abrus precatorius] XP_027363779.1 uncharacterized protein LOC113871145 [Abrus precatorius]	AT5G36740.2_Acyl-CoA N-acyltransferase with RING/FYVE/PHD-type zinc finger protein	IPR011011_Zinc finger, FYVE/PHD-type; IPR017956_AT hook, DNA-binding motif; IPR001965_Zinc finger, PHD-type; IPR032308_Jas TPL-binding domain	1.43333	0.983333	0.953333	2.11333	1.46	1.75	1.09	0.98	1.55	0.42	0.33	1.11	1.42	1.91	1.78	2.65
Am_Rn_000834	8052	XP_004487881.1_uncharacterized protein LOC113783882 isoform X1 [Cicer arietinum]	AT5G07900.1_Mitochondrial transcription termination factor family protein	IPR003690_Transcription termination factor, mitochondrial/chloroplastic	0.193333	0.93	0.94	0.723333	0.17	0.25	0.16	0.71	2.02	0.06	0	1.91	0.91	0	2.17	0
Am_Rn_000835	8050	PNX59439.1_cysteine-rich receptor-like protein kinase, partial [Trifolium pratense]	AT5G13260.1_myosin	.	4.2	0.03	0.33	0.203333	1.45	1.81	9.34	0	0.09	0	0.31	0.37	0.31	0.24	0.08	0.29
Am_Rn_000836	8049	XP_004503697.1_puromycin-sensitive aminopeptidase [Cicer arietinum]	AT1G63770.5_Peptidase M1 family protein	IPR014782_Peptidase M1, membrane alanine aminopeptidase; IPR035414_Peptidase M1, alanyl aminopeptidase, Ig-like fold; IPR045357_Aminopeptidase N-like , N-terminal domain; IPR042097_Aminopeptidase N-like , N-terminal domain superfamliy; IPR001930_Peptidase M1, alanine aminopeptidase/leukotriene A4 hydrolase; IPR024601_Peptidase M1, alanyl aminopeptidase, C-terminal; IPR012779_Peptidase M1, alanyl …	0	0	0	0	0	0	0	0	0	0	0	0	0	0	0	0
Am_Rn_000837	8048	XP_013466263.3_LEAF RUST 10 DISEASE-RESISTANCE LOCUS RECEPTOR-LIKE PROTEIN KINASE-like 2.1 isoform X1 [Medicago truncatula] RHN77719.1 putative glycerophosphodiester phosphodiesterase, protein kinase RLK-Pelle-LRK10L-2 family [Medicago truncatula]	AT3G15010.2_RNA-binding (RRM/RBD/RNP motifs) family protein	IPR025287_Wall-associated receptor kinase, galacturonan-binding domain	0.273333	2.14	0.14	0.793333	0.16	0.4	0.26	1.54	2.13	2.75	0.13	0.08	0.21	1.19	0.27	0.92
Am_Rn_000838	8046	XP_004505865.1_probable protein phosphatase 2C 4 [Cicer arietinum]	AT1G07630.1_pol-like 5, GeneName=PLL5	IPR036457_PPM-type phosphatase domain superfamily; IPR001932_PPM-type phosphatase domain	2.26667	5.39667	3.20667	4.41	3.2	2.09	1.51	4.61	6.67	4.91	1.51	4.49	3.62	3.54	5.18	4.51
Am_Rn_000839	8046	PNY15111.1_ribonuclease H [Trifolium pratense]	AT4G29090.1_Ribonuclease H-like superfamily protein	IPR036691_Endonuclease/exonuclease/phosphatase superfamily	0.02	0.826667	2.02	1.29333	0.03	0.03	0	0.6	1.04	0.84	1.24	2.48	2.34	0.65	0.41	2.82
Am_Rn_000840	8045	XP_045819805.1_G-type lectin S-receptor-like serine/threonine-protein kinase At4g27290 isoform X2 [Trifolium pratense]	AT4G27290.2_S-locus lectin protein kinase family protein	IPR003609_PAN/Apple domain; IPR000858_S-locus glycoprotein domain; IPR036426_Bulb-type lectin domain superfamily; IPR001480_Bulb-type lectin domain	0.07	2.13333	1.20667	1.43333	0.12	0	0.09	1.85	2.41	2.14	0.72	1.38	1.52	0.95	1.58	1.77
Am_Rn_000841	8045	PNY10806.1_histone deacetylase [Trifolium pratense]	AT4G23160.3_cysteine-rich RECEPTOR-like kinase, GeneName=CRK8	IPR025724_GAG-pre-integrase domain; IPR013103_Reverse transcriptase, RNA-dependent DNA polymerase; IPR043502_DNA/RNA polymerase superfamily; IPR012337_Ribonuclease H-like superfamily; IPR001584_Integrase, catalytic core	0.00666667	0.2	0.616667	0.39	0.02	0	0	0.22	0.38	0	0.74	1.11	0	0.61	0.56	0
Am_Rn_000842	8042	XP_027354249.1_protein RCC2 homolog isoform X1 [Abrus precatorius] XP_027354250.1 protein RCC2 homolog isoform X1 [Abrus precatorius]	AT1G19880.1_Regulator of chromosome condensation (RCC1) family protein	IPR025064_Domain of unknown function DUF4005	1.02667	0.883333	0.993333	0.916667	0.73	0.34	2.01	0.62	1.43	0.6	0.87	0.97	1.14	0.89	0.71	1.15
Am_Rn_000843	8041	XP_042379126.1_uncharacterized protein LOC121971764 isoform X1 [Zingiber officinale] XP_042388948.1 uncharacterized protein LOC121980797 [Zingiber officinale] XP_042444503.1 uncharacterized protein LOC122029540 [Zingiber officinale]	AT3G08550.1_elongation defective 1 protein / ELD1 protein, GeneName=KOB1	IPR007021_Domain of unknown function DUF659; IPR008906_HAT, C-terminal dimerisation domain; IPR012337_Ribonuclease H-like superfamily	0.19	0.47	0.253333	0.4	0.04	0.45	0.08	0.37	0.46	0.58	0.25	0.26	0.25	0.41	0.39	0.4
Am_Rn_000844	8041	XP_025678867.1_uncharacterized protein LOC112778796 [Arachis hypogaea]	AT4G29090.1_Ribonuclease H-like superfamily protein	IPR026960_Reverse transcriptase zinc-binding domain; IPR002156_Ribonuclease H domain; IPR000477_Reverse transcriptase domain; IPR043502_DNA/RNA polymerase superfamily; IPR012337_Ribonuclease H-like superfamily; IPR036691_Endonuclease/exonuclease/phosphatase superfamily	0.00666667	0.126667	0.13	0.136667	0	0	0.02	0.15	0.08	0.15	0.05	0.25	0.09	0.23	0	0.18
Am_Rn_000845	8040	XP_007158039.1_hypothetical protein PHAVU_002G119000g [Phaseolus vulgaris] ESW30033.1 hypothetical protein PHAVU_002G119000g [Phaseolus vulgaris]	AT2G17420.2_NADPH-dependent thioredoxin reductase A, GeneName=NTRA	IPR036188_FAD/NAD(P)-binding domain superfamily; IPR023753_FAD/NAD(P)-binding domain; IPR005982_Thioredoxin reductase	2.54667	0.53	0.526667	0.933333	1.05	3.43	3.16	0.83	0.39	0.37	0.2	0.61	0.77	1.42	0.73	0.65
Am_Rn_000846	8040	TKY59948.1_Long-chain-fatty-acid--of acyl-carrier-protein ligase AEE15 [Spatholobus suberectus]	AT4G14070.1_acyl-activating enzyme 15, GeneName=AAE15	IPR000873_AMP-dependent synthetase/ligase; IPR020459_AMP-binding	0.116667	0.766667	0.11	0.566667	0.31	0	0.04	0.46	1.07	0.77	0.33	0	0	1.37	0.33	0
Am_Rn_000847	8040	XP_003601312.2_flowering time control protein FPA isoform X1 [Medicago truncatula] AES71563.2 RNA recognition motif (RRM) containing protein [Medicago truncatula] RHN68859.1 putative nucleotide-binding alpha-beta plait domain-containing protein [Medicago truncatula]	AT4G12640.1_RNA recognition motif (RRM)-containing protein	IPR012921_Spen paralogue and orthologue SPOC, C-terminal; IPR035979_RNA-binding domain superfamily; IPR000504_RNA recognition motif domain	0.436667	0.763333	0.386667	0.72	0.59	0.54	0.18	0.28	1.44	0.57	0.21	0.52	0.43	0.48	0.92	0.76
Am_Rn_000848	8036	AES89655.1_callose synthase-like protein [Medicago truncatula]	AT4G03550.1_glucan synthase-like 5, GeneName=GSL05	IPR026899_1,3-beta-glucan synthase subunit FKS1-like, domain-1; IPR003440_Glycosyl transferase, family 48	7.09333	2.97	3.17667	4.16	3.98	9.06	8.24	2.03	3.74	3.14	3.01	3.59	2.93	6.13	2.1	4.25
Am_Rn_000849	8033	GAU26239.1_hypothetical protein TSUD_224300 [Trifolium subterraneum]	AT4G20520.1_RNA binding / RNA-directed DNA polymerase	.	0.403333	0.216667	0.1	0.02	0.38	0.08	0.75	0.31	0.19	0.15	0.16	0.08	0.06	0	0.06	0
Am_Rn_000850	8031	PNX92532.1_retrotransposon-related protein [Trifolium pratense]	ATMG00860.1_DNA/RNA polymerases superfamily protein, GeneName=ORF158	IPR043502_DNA/RNA polymerase superfamily; IPR000477_Reverse transcriptase domain; IPR005162_Retrotransposon gag domain; IPR021109_Aspartic peptidase domain superfamily	0.0433333	0.246667	0.25	0.58	0.03	0.09	0.01	0.14	0.4	0.2	0.03	0.35	0.37	0.38	0.66	0.7
Am_Rn_000851	8026	XP_045823020.1_alpha-N-acetylglucosaminidase isoform X1 [Trifolium pratense]	AT5G13690.1_alpha-N-acetylglucosaminidase family / NAGLU family, GeneName=CYL1	IPR024733_Alpha-N-acetylglucosaminidase, tim-barrel domain; IPR024732_Alpha-N-acetylglucosaminidase, C-terminal	0.546667	2.60333	1.28333	0.706667	0.58	0.57	0.49	3.26	1.25	3.3	0.97	1.32	1.56	0.7	1.08	0.34
Am_Rn_000852	8025	XP_045810455.1_uncharacterized protein LOC123904892 [Trifolium pratense]	AT3G24255.5_RNA-directed DNA polymerase (reverse transcriptase)-related family protein	IPR002156_Ribonuclease H domain; IPR012337_Ribonuclease H-like superfamily; IPR000477_Reverse transcriptase domain; IPR026960_Reverse transcriptase zinc-binding domain; IPR043502_DNA/RNA polymerase superfamily; IPR036691_Endonuclease/exonuclease/phosphatase superfamily	0.05	1.80667	0.106667	0.0866667	0.04	0.05	0.06	1.69	1.53	2.2	0.07	0.15	0.1	0.04	0.06	0.16
Am_Rn_000853	8024	XP_027358564.1_acetyl-CoA carboxylase 1-like [Abrus precatorius] XP_027358573.1 acetyl-CoA carboxylase 1-like [Abrus precatorius] XP_027358583.1 acetyl-CoA carboxylase 1-like [Abrus precatorius]	AT1G36160.2_acetyl-CoA carboxylase 1, GeneName=ACC1	IPR013537_Acetyl-CoA carboxylase, central domain; IPR011053_Single hybrid motif; IPR034733_Acetyl-CoA carboxylase; IPR011054_Rudiment single hybrid motif; IPR005481_Biotin carboxylase-like, N-terminal domain; IPR029045_ClpP/crotonase-like domain superfamily; IPR005482_Biotin carboxylase, C-terminal; IPR000089_Biotin/lipoyl attachment; IPR016185_Pre-ATP-grasp domain superfamily; IPR005479_Carbamoy…	35.73	54.09	27.4833	39.7567	35.44	47.21	24.54	54.47	53.92	53.88	4.22	34.9	43.33	24.82	40.11	54.34
Am_Rn_000854	8023	RDX98537.1_Alpha,alpha-trehalose-phosphate synthase [UDP-forming] 1, partial [Mucuna pruriens]	AT1G78580.1_trehalose-6-phosphate synthase, GeneName=TPS1	IPR036412_HAD-like superfamily; IPR003337_Trehalose-phosphatase	0.313333	1.1	1.86	0.77	0.37	0.46	0.11	0.83	1.41	1.06	0.83	2.82	1.93	0.65	1.14	0.52
Am_Rn_000855	8016	XP_004497413.2_sn1-specific diacylglycerol lipase beta isoform X1 [Cicer arietinum]	AT1G05790.2_lipase class 3 family protein	.	0.663333	0.806667	0.896667	0.96	0.39	0.79	0.81	0.72	1.13	0.57	0.28	1.11	1.3	0.68	1	1.2
Am_Rn_000856	8014	TKY70828.1_transport protein SEC16B-like [Spatholobus suberectus]	AT1G59760.1_RNA helicase, ATP-dependent, SK12/DOB1 protein, GeneName=MTR4	IPR024298_Ancestral coatomer element 1, Sec16/Sec31	0.553333	0	0.166667	0.133333	0.66	0	1	0	0	0	0	0.34	0.16	0.4	0	0
Am_Rn_000857	8014	XP_004511499.1_probable serine/threonine-protein kinase At1g09600 [Cicer arietinum]	AT4G10010.1_Protein kinase superfamily protein	IPR000163_Prohibitin	1.17667	3.39333	4.34	5.63333	0.67	2.05	0.81	2.02	4.38	3.78	3.11	4.93	4.98	4.5	6.14	6.26
Am_Rn_000858	8014	XP_014622155.1_uncharacterized protein LOC100818989 [Glycine max]	AT1G50830.1_Aminotransferase-like, plant mobile domain family protein	IPR012337_Ribonuclease H-like superfamily; IPR041577_Reverse transcriptase/retrotransposon-derived protein, RNase H-like domain; IPR043502_DNA/RNA polymerase superfamily; IPR041588_Integrase zinc-binding domain; IPR002156_Ribonuclease H domain	0	0.323333	0.406667	0.0266667	0	0	0	0	0.74	0.23	0.29	0.59	0.34	0.08	0	0
Am_Rn_000859	8013	RDY09343.1_Auxilin-like protein 1, partial [Mucuna pruriens]	AT4G36520.1_Chaperone DnaJ-domain superfamily protein	.	0.02	1.35667	0.253333	0.336667	0	0	0.06	0.51	1.75	1.81	0.05	0.16	0.55	0.3	0.42	0.29
Am_Rn_000860	8013	KAG7597976.1_Retrotransposon Copia-like N-terminal [Arabidopsis suecica]	AT4G23160.3_cysteine-rich RECEPTOR-like kinase, GeneName=CRK8	IPR012337_Ribonuclease H-like superfamily; IPR043502_DNA/RNA polymerase superfamily; IPR013103_Reverse transcriptase, RNA-dependent DNA polymerase; IPR001584_Integrase, catalytic core	0.0966667	0.906667	0.693333	0.786667	0.1	0.19	0	0.8	0.91	1.01	0.75	0.74	0.59	0.59	1.12	0.65
Am_Rn_000861	8012	RHN82321.1_putative RNA-directed DNA polymerase [Medicago truncatula]	AT5G61980.1_ARF-GAP domain 1, GeneName=AGD1	IPR027267_AH/BAR domain superfamily; IPR001849_Pleckstrin homology domain; IPR004148_BAR domain	0.213333	0.706667	0.523333	0.473333	0.26	0.1	0.28	0.76	0.62	0.74	0.22	0.69	0.66	0.31	0.41	0.7
Am_Rn_000862	8010	RDX68773.1_Protein CHROMATIN REMODELING 4, partial [Mucuna pruriens]	AT5G44800.1_chromatin remodeling 4, GeneName=CHR4	IPR027417_P-loop containing nucleoside triphosphate hydrolase; IPR011011_Zinc finger, FYVE/PHD-type; IPR001965_Zinc finger, PHD-type; IPR016197_Chromo-like domain superfamily; IPR001650_Helicase, C-terminal; IPR023780_Chromo domain; IPR009463_Domain of unknown function DUF1087; IPR014001_Helicase superfamily 1/2, ATP-binding domain; IPR009057_Homeobox-like domain superfamily; IPR000953_Chromo/chr…	14.62	12.32	8.39	12.7533	19.3	12.42	12.14	12	13.18	11.78	2.73	11.64	10.8	9.28	12.97	16.01
Am_Rn_000863	8001	PNX76538.1_hypothetical protein L195_g032490, partial [Trifolium pratense]	ATMG00860.1_DNA/RNA polymerases superfamily protein, GeneName=ORF158	IPR012337_Ribonuclease H-like superfamily; IPR016197_Chromo-like domain superfamily; IPR023780_Chromo domain; IPR041588_Integrase zinc-binding domain; IPR000953_Chromo/chromo shadow domain	0.0333333	0.12	0.133333	0.226667	0	0.1	0	0	0.36	0	0.06	0.28	0.06	0.13	0.5	0.05
Am_Rn_000864	7999	TKY70948.1_Lysine-specific demethylase 5B [Spatholobus suberectus]	AT1G63490.4_transcription factor jumonji (jmjC) domain-containing protein	IPR003347_JmjC domain; IPR011011_Zinc finger, FYVE/PHD-type; IPR001965_Zinc finger, PHD-type; IPR036431_ARID DNA-binding domain superfamily; IPR001606_ARID DNA-binding domain; IPR003349_JmjN domain; IPR004198_Zinc finger, C5HC2-type; IPR019787_Zinc finger, PHD-finger	0.56	0.566667	0.22	0.39	0.59	0.65	0.44	0.7	0.66	0.34	0.1	0.39	0.17	0.59	0.58	0
Am_Rn_000865	7998	.	.	.	0.01	1.39667	0.24	0.156667	0.03	0	0	1.86	0.65	1.68	0.14	0.17	0.41	0.26	0.03	0.18
Am_Rn_000866	7997	.	.	.	0.923333	0.493333	0.993333	0.62	0	1.39	1.38	0	0.69	0.79	0	1.54	1.44	0.13	0.76	0.97
Am_Rn_000867	7994	XP_004491039.1_staphylococcal-like nuclease CAN2 [Cicer arietinum]	AT3G56170.1_Ca-2+ dependent nuclease, GeneName=CAN	.	0	0	0	0	0	0	0	0	0	0	0	0	0	0	0	0
Am_Rn_000868	7992	XP_045831703.1_protein CHROMATIN REMODELING 5 [Trifolium pratense]	AT2G13370.2_chromatin remodeling 5, GeneName=CHR5	IPR027417_P-loop containing nucleoside triphosphate hydrolase; IPR000953_Chromo/chromo shadow domain; IPR000330_SNF2, N-terminal; IPR016197_Chromo-like domain superfamily; IPR023780_Chromo domain; IPR014001_Helicase superfamily 1/2, ATP-binding domain; IPR001650_Helicase, C-terminal	0.906667	1.38	0.863333	1.06	0.69	1.01	1.02	1.05	1.86	1.23	0.91	0.99	0.69	1.31	0.91	0.96
Am_Rn_000869	7988	TKY47720.1_restin-like [Spatholobus suberectus]	AT1G24460.1_TGN-related, localized SYP41 interacting protein, GeneName=TNO1	.	0.18	0.513333	0.62	0.623333	0.41	0.13	0	0	0.65	0.89	0.35	0.58	0.93	0.94	0.21	0.72
Am_Rn_000870	7985	XP_027362304.1_serine/threonine-protein kinase TOR isoform X1 [Abrus precatorius]	AT1G50030.1_target of rapamycin, GeneName=TOR	IPR036738_FKBP12-rapamycin binding domain superfamily; IPR011990_Tetratricopeptide-like helical domain superfamily; IPR011009_Protein kinase-like domain superfamily; IPR009076_FKBP12-rapamycin binding domain; IPR000403_Phosphatidylinositol 3-/4-kinase, catalytic domain; IPR003151_PIK-related kinase, FAT	0.0666667	0	0.0633333	0	0	0	0.2	0	0	0	0	0	0.19	0	0	0
Am_Rn_000871	7984	XP_004499790.1_uncharacterized protein LOC101496970 [Cicer arietinum] XP_012571106.1 uncharacterized protein LOC101496970 [Cicer arietinum] XP_012571107.1 uncharacterized protein LOC101496970 [Cicer arietinum]	AT2G32910.1_DCD (Development and Cell Death) domain protein	IPR013989_Development/cell death domain	0.54	1.27	0.956667	1.41667	0.67	0.52	0.43	1.16	1.46	1.19	0.25	1.38	1.24	1.43	1.19	1.63
Am_Rn_000872	7983	GAU33038.1_hypothetical protein TSUD_151930, partial [Trifolium subterraneum]	.	.	0	0.0733333	0.0233333	0.0966667	0	0	0	0.08	0.06	0.08	0	0	0.07	0	0.11	0.18
Am_Rn_000873	7982	GAU26239.1_hypothetical protein TSUD_224300 [Trifolium subterraneum]	AT4G20520.1_RNA binding / RNA-directed DNA polymerase	IPR036691_Endonuclease/exonuclease/phosphatase superfamily	5.93333	2.16	1.92333	1.47	3.11	11.86	2.83	2.74	2.75	0.99	2.5	1.29	1.98	2.64	0.8	0.97
Am_Rn_000874	7978	PRQ52345.1_putative RNA-directed DNA polymerase [Rosa chinensis]	AT4G23160.3_cysteine-rich RECEPTOR-like kinase, GeneName=CRK8	IPR013103_Reverse transcriptase, RNA-dependent DNA polymerase; IPR043502_DNA/RNA polymerase superfamily	0.656667	1.21667	2.34333	3.83333	0.42	0.98	0.57	1.01	1.87	0.77	2.86	1.91	2.26	4.3	3.95	3.25
Am_Rn_000875	7978	RDX69337.1_hypothetical protein CR513_51561, partial [Mucuna pruriens]	AT4G29790.1_serine/arginine repetitive matrix protein	.	0.593333	0.55	0.706667	0.636667	0.27	0.99	0.52	0.77	0.48	0.4	0.28	0.85	0.99	0.76	0.56	0.59
Am_Rn_000876	7977	XP_027362985.1_protein HUA2-LIKE 2-like isoform X1 [Abrus precatorius]	AT3G63070.1_Tudor/PWWP/MBT domain-containing protein	IPR006569_CID domain	0.626667	0.0633333	0	0.97	0.76	0.95	0.17	0	0.13	0.06	0	0	0	0.61	1.52	0.78
Am_Rn_000877	7975	MCH81232.1_root phototropism protein 2-like [Trifolium medium]	AT2G30520.1_Phototropic-responsive NPH3 family protein, GeneName=RPT2	IPR027356_NPH3 domain; IPR011333_SKP1/BTB/POZ domain superfamily	1.79333	0.06	0.41	0.21	0.65	2.02	2.71	0.11	0.04	0.03	0.23	0.61	0.39	0.38	0.05	0.2
Am_Rn_000878	7973	XP_012575158.1_glutamate receptor 2.9-like isoform X1 [Cicer arietinum]	AT2G29100.1_glutamate receptor 2.9, GeneName=GLR2.9	IPR001320_Ionotropic glutamate receptor; IPR028082_Periplasmic binding protein-like I; IPR001828_Receptor, ligand binding region; IPR001638_Solute-binding protein family 3/N-terminal domain of MltF	1.12333	0.0466667	0.0133333	0.0933333	0	2.44	0.93	0.08	0	0.06	0	0.04	0	0.28	0	0
Am_Rn_000879	7971	XP_004511695.1_uncharacterized protein LOC101504440 isoform X2 [Cicer arietinum]	AT4G17330.3_G2484-1 protein, GeneName=G2484-1	IPR008395_Agenet-like domain	18.5267	17.5433	0.803333	7.97333	22.34	24.75	8.49	11.62	27.48	13.53	1.51	0	0.9	2.43	4.88	16.61
Am_Rn_000880	7971	KAG8487839.1_hypothetical protein CXB51_018073 [Gossypium anomalum]	AT4G23160.3_cysteine-rich RECEPTOR-like kinase, GeneName=CRK8	IPR001584_Integrase, catalytic core; IPR013103_Reverse transcriptase, RNA-dependent DNA polymerase; IPR043502_DNA/RNA polymerase superfamily; IPR012337_Ribonuclease H-like superfamily; IPR025724_GAG-pre-integrase domain	0.516667	1.1	0.763333	0.63	1.16	0.14	0.25	1.03	1.26	1.01	0.68	1.14	0.47	0.5	1.11	0.28
Am_Rn_000881	7970	XP_004491039.1_staphylococcal-like nuclease CAN2 [Cicer arietinum]	AT3G56170.1_Ca-2+ dependent nuclease, GeneName=CAN	.	0.69	1.45667	1.1	1.39667	0.32	1.12	0.63	1.6	1.82	0.95	0.18	1.59	1.53	2.11	0.95	1.13
Am_Rn_000882	7968	GAU20581.1_hypothetical protein TSUD_33280, partial [Trifolium subterraneum]	AT3G04240.1_Tetratricopeptide repeat (TPR)-like superfamily protein, GeneName=SEC	IPR001440_Tetratricopeptide repeat 1; IPR019734_Tetratricopeptide repeat; IPR006597_Sel1-like repeat; IPR011990_Tetratricopeptide-like helical domain superfamily; IPR029489_O-GlcNAc transferase, C-terminal	2.69667	7.43667	7.66	9.86667	1.18	4.21	2.7	4.32	9.82	8.17	1.59	9.25	12.14	6.43	11.5	11.67
Am_Rn_000883	7962	XP_045806965.1_pre-mRNA-processing-splicing factor 8A isoform X2 [Trifolium pratense]	AT1G80070.1_Pre-mRNA-processing-splicing factor, GeneName=SUS2	IPR019581_Pre-mRNA-processing-splicing factor 8, U5-snRNA-binding; IPR012592_PROCN domain; IPR019582_RNA recognition motif, spliceosomal PrP8; IPR012337_Ribonuclease H-like superfamily; IPR012591_PRO8NT domain	0.0966667	0	0.316667	0	0.29	0	0	0	0	0	0.64	0.31	0	0	0	0
Am_Rn_000884	7961	RDY10245.1_hypothetical protein CR513_05262, partial [Mucuna pruriens]	AT3G01180.1_starch synthase 2, GeneName=SS2	IPR013534_Starch synthase, catalytic domain	0.293333	4.06333	0.316667	0.246667	0.3	0.19	0.39	5.43	2.83	3.93	0.08	0.39	0.48	0.3	0.22	0.22
Am_Rn_000885	7957	XP_045820380.1_uncharacterized protein LOC123913619 [Trifolium pratense]	AT1G23890.1_NHL domain-containing protein	IPR000477_Reverse transcriptase domain; IPR041588_Integrase zinc-binding domain; IPR005162_Retrotransposon gag domain; IPR043502_DNA/RNA polymerase superfamily; IPR001584_Integrase, catalytic core; IPR012337_Ribonuclease H-like superfamily; IPR002156_Ribonuclease H domain; IPR041577_Reverse transcriptase/retrotransposon-derived protein, RNase H-like domain	0.236667	0	1.67333	0	0.52	0	0.19	0	0	0	0.73	4.02	0.27	0	0	0
Am_Rn_000886	7957	RHN69276.1_putative RNA-directed DNA polymerase [Medicago truncatula]	AT4G23160.3_cysteine-rich RECEPTOR-like kinase, GeneName=CRK8	IPR029472_Retrotransposon Copia-like, N-terminal; IPR043502_DNA/RNA polymerase superfamily; IPR013103_Reverse transcriptase, RNA-dependent DNA polymerase; IPR012337_Ribonuclease H-like superfamily	1.94	2.68667	2.56333	1.44333	1.17	2.88	1.77	2.45	3.32	2.29	0.75	4.57	2.37	1.05	2.22	1.06
Am_Rn_000887	7954	KZV25004.1_Cysteine-rich RLK (receptor-like protein kinase) 8 [Dorcoceras hygrometricum]	AT4G23160.3_cysteine-rich RECEPTOR-like kinase, GeneName=CRK8	IPR012337_Ribonuclease H-like superfamily; IPR043502_DNA/RNA polymerase superfamily; IPR001584_Integrase, catalytic core; IPR013103_Reverse transcriptase, RNA-dependent DNA polymerase	0.926667	9.99	14.0867	2.67667	0.76	1.41	0.61	7.23	11.53	11.21	7.99	16.78	17.49	1.84	2.29	3.9
Am_Rn_000888	7952	RYR53138.1_hypothetical protein Ahy_A06g028110 isoform C [Arachis hypogaea]	AT5G03650.1_starch branching enzyme 2.2, GeneName=SBE2.2	IPR021109_Aspartic peptidase domain superfamily; IPR000477_Reverse transcriptase domain; IPR043502_DNA/RNA polymerase superfamily	0.06	0.653333	0.293333	0.613333	0.03	0.15	0	1.04	0.4	0.52	0.39	0.26	0.23	0.88	0.71	0.25
Am_Rn_000889	7950	XP_004502452.1_protein CELLULOSE SYNTHASE INTERACTIVE 1 isoform X1 [Cicer arietinum]	AT2G22125.1_binding protein, GeneName=CSI1	IPR000225_Armadillo; IPR016024_Armadillo-type fold	8.30667	7.45667	8.82333	15.2433	5.49	12.82	6.61	5.44	9.81	7.12	3.43	11.66	11.38	11.99	14.87	18.87
Am_Rn_000890	7948	BAG72152.1_hypothetical protein [Lotus japonicus]	AT5G17770.1_NADH:cytochrome B5 reductase 1, GeneName=CBR	IPR021109_Aspartic peptidase domain superfamily; IPR043502_DNA/RNA polymerase superfamily; IPR000477_Reverse transcriptase domain	0.466667	0.133333	0.46	0.396667	0.91	0.38	0.11	0.16	0.1	0.14	0.31	0.71	0.36	0.3	0.78	0.11
Am_Rn_000891	7944	XP_004508475.1_WD repeat-containing protein 11 isoform X3 [Cicer arietinum]	AT3G33530.4_Transducin family protein / WD-40 repeat family protein	IPR036322_WD40-repeat-containing domain superfamily	0.49	0.236667	0.31	0.356667	0.42	0.89	0.16	0.11	0.45	0.15	0.08	0.28	0.57	0.36	0.19	0.52
Am_Rn_000892	7944	XP_025678867.1_uncharacterized protein LOC112778796 [Arachis hypogaea]	AT4G29090.1_Ribonuclease H-like superfamily protein	IPR000477_Reverse transcriptase domain; IPR043502_DNA/RNA polymerase superfamily	0.01	0	0.01	0.00666667	0	0	0.03	0	0	0	0.01	0	0.02	0	0.02	0
Am_Rn_000893	7939	GAU28992.1_hypothetical protein TSUD_391930 [Trifolium subterraneum]	AT2G44065.2_Ribosomal protein L2 family	IPR041588_Integrase zinc-binding domain; IPR041373_Reverse transcriptase, RNase H-like domain; IPR001584_Integrase, catalytic core; IPR016197_Chromo-like domain superfamily; IPR012337_Ribonuclease H-like superfamily; IPR043502_DNA/RNA polymerase superfamily	0.473333	1.17	1.01667	1.41667	0.46	0.6	0.36	0.89	1.27	1.35	0.81	1.18	1.06	1.38	1.32	1.55
Am_Rn_000894	7938	XP_027190985.1_protein NYNRIN-like [Cicer arietinum]	AT4G32480.1_sugar phosphate exchanger, putative (DUF506)	IPR041577_Reverse transcriptase/retrotransposon-derived protein, RNase H-like domain; IPR043502_DNA/RNA polymerase superfamily; IPR000477_Reverse transcriptase domain	11.7067	14.8667	3.77333	5.82667	11.45	4.27	19.4	18	8.77	17.83	0	3.52	7.8	0.35	9.07	8.06
Am_Rn_000895	7936	PNX76926.1_phosphoglycerate mutase-like protein [Trifolium pratense] PNX77242.1 phosphoglycerate mutase-like protein [Trifolium pratense]	AT5G64460.5_Phosphoglycerate mutase family protein	.	0.113333	1.15	0.44	0.12	0	0.09	0.25	0.82	1.77	0.86	0.31	0.5	0.51	0	0.09	0.27
Am_Rn_000896	7930	XP_027348820.1_mediator of RNA polymerase II transcription subunit 12-like isoform X1 [Abrus precatorius]	AT4G00450.2_RNA polymerase II transcription mediator, GeneName=CCT	IPR019035_Mediator complex, subunit Med12	5.46333	9.36	6.34333	8.61333	5.41	5.91	5.07	8.34	10.45	9.29	4.3	7.05	7.68	6.91	8.95	9.98
Am_Rn_000897	7929	GAU41760.1_hypothetical protein TSUD_13610 [Trifolium subterraneum]	.	.	0.816667	1.48333	1.15667	3.00333	0.76	1.34	0.35	1.05	1.94	1.46	0.53	1.64	1.3	2.34	3.86	2.81
Am_Rn_000898	7928	RDX64688.1_SNARE-interacting protein KEULE [Mucuna pruriens]	AT1G12360.1_Sec1/munc18-like (SM) proteins superfamily, GeneName=KEU	IPR036045_Sec1-like superfamily; IPR001619_Sec1-like protein	0.03	0	0	0.0166667	0	0.04	0.05	0	0	0	0	0	0	0	0.05	0
Am_Rn_000899	7927	GAU34596.1_hypothetical protein TSUD_15110 [Trifolium subterraneum]	AT1G77020.1_DNAJ heat shock N-terminal domain-containing protein	IPR003340_B3 DNA binding domain; IPR015300_DNA-binding pseudobarrel domain superfamily	0.336667	0.123333	0.14	0.0766667	0.36	0.08	0.57	0.13	0	0.24	0	0.29	0.13	0	0.23	0
Am_Rn_000900	7924	XP_004495555.1_probable UDP-N-acetylglucosamine--peptide N-acetylglucosaminyltransferase SEC isoform X1 [Cicer arietinum]	AT3G04240.1_Tetratricopeptide repeat (TPR)-like superfamily protein, GeneName=SEC	IPR019734_Tetratricopeptide repeat; IPR029489_O-GlcNAc transferase, C-terminal; IPR006597_Sel1-like repeat; IPR011990_Tetratricopeptide-like helical domain superfamily; IPR001440_Tetratricopeptide repeat 1	19.4333	30.4067	30.2733	30.3033	19.23	24.62	14.45	30.48	27.81	32.93	21.42	37.35	32.05	32.05	29.72	29.14
Am_Rn_000901	7921	KOM52097.1_hypothetical protein LR48_Vigan09g075600 [Vigna angularis]	AT2G32810.2_beta galactosidase 9, GeneName=BGAL9	IPR001944_Glycoside hydrolase, family 35; IPR008979_Galactose-binding-like domain superfamily	0.393333	1.03333	0.673333	0.48	0.39	0.42	0.37	1.44	0.92	0.74	0.34	0.95	0.73	0.5	0.58	0.36
Am_Rn_000902	7920	KHN21230.1_Retrovirus-related Pol polyprotein from transposon TNT 1-94, partial [Glycine soja]	AT1G34300.1_lectin protein kinase family protein	IPR025724_GAG-pre-integrase domain; IPR001584_Integrase, catalytic core; IPR013103_Reverse transcriptase, RNA-dependent DNA polymerase; IPR012337_Ribonuclease H-like superfamily; IPR043502_DNA/RNA polymerase superfamily	19.2167	35.3367	11.2367	22.2067	27.75	17.96	11.94	32.11	35.57	38.33	10.11	8.82	14.78	30.17	20.83	15.62
Am_Rn_000903	7915	XP_045817872.1_importin-4-like [Trifolium pratense]	AT4G27640.1_ARM repeat superfamily protein	IPR016024_Armadillo-type fold; IPR001494_Importin-beta, N-terminal domain; IPR000357_HEAT repeat	0.563333	0.566667	0.566667	0.936667	0.78	0.5	0.41	0.73	0.63	0.34	0.27	0.67	0.76	0.87	1.04	0.9
Am_Rn_000904	7915	RHN45205.1_putative F-box domain, FBD domain, leucine-rich repeat domain, L domain-containing protein [Medicago truncatula]	AT4G10400.1_F-box/RNI-like/FBD-like domains-containing protein	IPR036047_F-box-like domain superfamily; IPR006566_FBD domain	4.01333	2.09667	1.15667	2.08	8.59	1.86	1.59	2.63	1.82	1.84	0.71	1.62	1.14	2.91	2.22	1.11
Am_Rn_000905	7913	AES91771.2_SNF2 family amino-terminal protein [Medicago truncatula]	.	.	0.746667	3.8	3.01667	2.08	0.47	1.42	0.35	3.65	4.88	2.87	3.65	3.25	2.15	1.29	3.3	1.65
Am_Rn_000906	7913	XP_045831703.1_protein CHROMATIN REMODELING 5 [Trifolium pratense]	AT2G13370.2_chromatin remodeling 5, GeneName=CHR5	IPR027417_P-loop containing nucleoside triphosphate hydrolase; IPR000953_Chromo/chromo shadow domain; IPR000330_SNF2, N-terminal; IPR016197_Chromo-like domain superfamily; IPR023780_Chromo domain; IPR014001_Helicase superfamily 1/2, ATP-binding domain; IPR001650_Helicase, C-terminal	0	0	0	0	0	0	0	0	0	0	0	0	0	0	0	0
Am_Rn_000907	7913	TKY50406.1_Methyl-CpG-binding domain-containing protein 9 [Spatholobus suberectus]	AT3G01460.1_methyl-CPG-binding domain 9, GeneName=MBD9	IPR011011_Zinc finger, FYVE/PHD-type; IPR016177_DNA-binding domain superfamily; IPR001965_Zinc finger, PHD-type; IPR001739_Methyl-CpG DNA binding; IPR001487_Bromodomain; IPR036427_Bromodomain-like superfamily; IPR019787_Zinc finger, PHD-finger; IPR028942_WHIM1 domain	11.8833	4.84	5.27333	7.36333	17.02	8.78	9.85	5.21	4.64	4.67	2.33	7.36	6.13	4.41	9.26	8.42
Am_Rn_000908	7908	PNY14726.1_putative UDP-N-acetylglucosamine-peptide N-acetylglucosaminyltransferase SEC-like protein [Trifolium pratense]	AT3G04240.2_Tetratricopeptide repeat (TPR)-like superfamily protein, GeneName=SEC	IPR029489_O-GlcNAc transferase, C-terminal; IPR011990_Tetratricopeptide-like helical domain superfamily; IPR001440_Tetratricopeptide repeat 1; IPR019734_Tetratricopeptide repeat	4.35333	2.36	3.01333	4.42	6.72	2.98	3.36	2.01	2.59	2.48	2.91	3.27	2.86	4.23	5.83	3.2
Am_Rn_000909	7903	XP_026279320.1_chromodomain-helicase-DNA-binding protein Mi-2 homolog [Frankliniella occidentalis]	AT2G25170.1_chromatin remodeling factor CHD3 (PICKLE), GeneName=PKL	IPR009462_CHD subfamily II, SANT-like domain; IPR027417_P-loop containing nucleoside triphosphate hydrolase; IPR019787_Zinc finger, PHD-finger; IPR009463_Domain of unknown function DUF1087; IPR000330_SNF2, N-terminal; IPR016197_Chromo-like domain superfamily; IPR012957_CHD, C-terminal 2; IPR011011_Zinc finger, FYVE/PHD-type; IPR001650_Helicase, C-terminal; IPR012958_CHD, N-terminal; IPR000953_Chr…	0	0.0833333	3.01667	0	0	0	0	0	0.14	0.11	6.67	1.18	1.2	0	0	0
Am_Rn_000910	7900	XP_004485591.1_uncharacterized protein LOC101489448 [Cicer arietinum] XP_004485592.1 uncharacterized protein LOC101489448 [Cicer arietinum]	AT1G02170.1_metacaspase 1, GeneName=MC1	IPR013087_Zinc finger C2H2-type; IPR016177_DNA-binding domain superfamily	2.00667	1.23667	2.14	2.11667	2.56	0.8	2.66	1.65	0.75	1.31	1.43	2.59	2.4	2.86	1.02	2.47
Am_Rn_000911	7899	XP_004504301.1_uncharacterized protein LOC101499907 [Cicer arietinum]	AT1G29120.2_Hydrolase-like protein family	IPR007751_Domain of unknown function DUF676, lipase-like; IPR029058_Alpha/Beta hydrolase fold	0.573333	0.17	0.0466667	0.223333	1.27	0.17	0.28	0.15	0.36	0	0.02	0.12	0	0.21	0.34	0.12
Am_Rn_000912	7898	XP_045826038.1_pentatricopeptide repeat-containing protein At1g62260, mitochondrial [Trifolium pratense]	AT1G62260.1_mitochondrial editing factor 9, GeneName=MEF9	IPR011990_Tetratricopeptide-like helical domain superfamily; IPR002885_Pentatricopeptide repeat	0.0333333	0.5	0.286667	0.606667	0	0.1	0	0.62	0.6	0.28	0	0.44	0.42	0	1.04	0.78
Am_Rn_000913	7895	XP_004509458.1_serine/threonine-protein kinase/endoribonuclease IRE1a-like isoform X1 [Cicer arietinum]	AT2G17520.1_Endoribonuclease/protein kinase IRE1-like protein, GeneName=IRE1A	IPR010513_KEN domain; IPR011009_Protein kinase-like domain superfamily; IPR000719_Protein kinase domain	0.493333	0.103333	0	0.203333	0.96	0	0.52	0	0.31	0	0	0	0	0	0	0.61
Am_Rn_000914	7893	XP_045820380.1_uncharacterized protein LOC123913619 [Trifolium pratense]	AT1G23890.1_NHL domain-containing protein	IPR005162_Retrotransposon gag domain; IPR041577_Reverse transcriptase/retrotransposon-derived protein, RNase H-like domain; IPR000477_Reverse transcriptase domain; IPR043502_DNA/RNA polymerase superfamily	2.01	1.48667	0.0433333	2.84667	1.97	4.06	0	1.32	3.14	0	0	0.13	0	3.36	5.18	0
Am_Rn_000915	7893	RHN82321.1_putative RNA-directed DNA polymerase [Medicago truncatula]	AT2G41040.1_S-adenosyl-L-methionine-dependent methyltransferases superfamily protein	IPR001878_Zinc finger, CCHC-type; IPR036875_Zinc finger, CCHC-type superfamily	1.23667	3.39	2.30667	2.66667	1.13	1.7	0.88	3.08	4.03	3.06	1.07	3.08	2.77	2.01	3.1	2.89
Am_Rn_000916	7892	MCH79452.1_hypothetical protein [Trifolium medium]	AT1G24090.1_RNase H family protein	IPR004332_Transposase, MuDR, plant	1.33667	0.9	0.503333	0.556667	1.08	0.38	2.55	1.05	1.18	0.47	0.88	0.31	0.32	0	0.56	1.11
Am_Rn_000917	7889	XP_020230207.1_uncharacterized protein LOC109810994 [Cajanus cajan]	AT4G23160.3_cysteine-rich RECEPTOR-like kinase, GeneName=CRK8	IPR005162_Retrotransposon gag domain	0.2	0.71	0.52	0.58	0.08	0.24	0.28	0.44	0.94	0.75	0.59	0.31	0.66	0.25	0.59	0.9
Am_Rn_000918	7887	XP_027189985.1_probable UDP-N-acetylglucosamine--peptide N-acetylglucosaminyltransferase SEC isoform X2 [Cicer arietinum]	AT3G04240.1_Tetratricopeptide repeat (TPR)-like superfamily protein, GeneName=SEC	IPR019734_Tetratricopeptide repeat; IPR001440_Tetratricopeptide repeat 1; IPR006597_Sel1-like repeat; IPR011990_Tetratricopeptide-like helical domain superfamily; IPR029489_O-GlcNAc transferase, C-terminal	2.76333	2.13	3.43	6.58667	3.01	0.04	5.24	0	6.39	0	1.93	3.53	4.83	3.85	6.07	9.84
Am_Rn_000919	7887	KHN21230.1_Retrovirus-related Pol polyprotein from transposon TNT 1-94, partial [Glycine soja]	AT4G23160.3_cysteine-rich RECEPTOR-like kinase, GeneName=CRK8	IPR001584_Integrase, catalytic core; IPR012337_Ribonuclease H-like superfamily; IPR025724_GAG-pre-integrase domain; IPR043502_DNA/RNA polymerase superfamily; IPR013103_Reverse transcriptase, RNA-dependent DNA polymerase	0.846667	2.89	1.15667	1.93333	0.24	1.63	0.67	1.8	4.67	2.2	0	1.98	1.49	0.66	3.46	1.68
Am_Rn_000920	7887	KAF8410840.1_hypothetical protein HHK36_003377 [Tetracentron sinense]	AT3G13070.1_CBS domain-containing protein / transporter associated domain-containing protein	.	0.0933333	0.846667	0.513333	0.583333	0.06	0.12	0.1	0.77	1.19	0.58	0.3	0.59	0.65	0.67	0.55	0.53
Am_Rn_000921	7883	BAG72150.1_hypothetical protein [Lotus japonicus]	ATMG00860.1_DNA/RNA polymerases superfamily protein, GeneName=ORF158	IPR016197_Chromo-like domain superfamily; IPR041577_Reverse transcriptase/retrotransposon-derived protein, RNase H-like domain; IPR000477_Reverse transcriptase domain; IPR041588_Integrase zinc-binding domain; IPR021109_Aspartic peptidase domain superfamily; IPR012337_Ribonuclease H-like superfamily; IPR043502_DNA/RNA polymerase superfamily	5.39333	12.02	2.72333	4.80333	10.17	5.78	0.23	23.69	12.19	0.18	1.94	6.11	0.12	7.9	6.21	0.3
Am_Rn_000922	7883	XP_025678867.1_uncharacterized protein LOC112778796 [Arachis hypogaea]	AT4G29090.1_Ribonuclease H-like superfamily protein	IPR026960_Reverse transcriptase zinc-binding domain; IPR002156_Ribonuclease H domain; IPR000477_Reverse transcriptase domain; IPR043502_DNA/RNA polymerase superfamily; IPR012337_Ribonuclease H-like superfamily; IPR036691_Endonuclease/exonuclease/phosphatase superfamily	0.0666667	0.273333	0.0833333	0.183333	0.06	0.12	0.02	0.24	0.36	0.22	0.05	0	0.2	0.06	0.34	0.15
Am_Rn_000923	7880	XP_004497789.1_DNA mismatch repair protein MSH1, mitochondrial [Cicer arietinum]	AT3G24320.1_MUTL protein homolog 1, GeneName=MSH1	IPR000432_DNA mismatch repair protein MutS, C-terminal; IPR035901_GIY-YIG endonuclease superfamily; IPR027417_P-loop containing nucleoside triphosphate hydrolase	0.08	0.15	0.06	0.03	0.13	0.11	0	0	0.21	0.24	0	0.18	0	0	0	0.09
Am_Rn_000924	7879	TKY70828.1_transport protein SEC16B-like [Spatholobus suberectus]	AT1G59760.1_RNA helicase, ATP-dependent, SK12/DOB1 protein, GeneName=MTR4	IPR024298_Ancestral coatomer element 1, Sec16/Sec31	0.136667	0.903333	0.463333	0.41	0	0.41	0	1.45	0.78	0.48	0.57	0.82	0	0.49	0.51	0.23
Am_Rn_000925	7877	GAU26239.1_hypothetical protein TSUD_224300 [Trifolium subterraneum]	AT3G24255.5_RNA-directed DNA polymerase (reverse transcriptase)-related family protein	IPR012340_Nucleic acid-binding, OB-fold; IPR003871_Domain of unknown function DUF223	8.57333	4.85333	5.17	7.57667	15.79	5.25	4.68	4.26	5.45	4.85	2.99	5.72	6.8	5.63	8.33	8.77
Am_Rn_000926	7877	XP_039683852.1_uncharacterized protein LOC112416600 [Medicago truncatula]	AT1G24090.1_RNase H family protein	IPR002156_Ribonuclease H domain; IPR000477_Reverse transcriptase domain; IPR012337_Ribonuclease H-like superfamily; IPR041577_Reverse transcriptase/retrotransposon-derived protein, RNase H-like domain; IPR043502_DNA/RNA polymerase superfamily	0.483333	0.936667	0.0666667	0.106667	1.11	0.22	0.12	1.05	0.96	0.8	0.03	0.09	0.08	0.14	0.14	0.04
Am_Rn_000927	7876	XP_013458436.1_myosin-17 [Medicago truncatula] KEH32467.1 DIL domain myosin family protein [Medicago truncatula] RHN64597.1 putative myosin ATPase [Medicago truncatula]	AT5G20490.2_myosin family protein with Dil, GeneName=XIK	IPR002710_Dilute domain; IPR001609_Myosin head, motor domain; IPR027417_P-loop containing nucleoside triphosphate hydrolase; IPR004009_Myosin, N-terminal, SH3-like; IPR000048_IQ motif, EF-hand binding site	6.22667	10.38	5.21667	5.22333	6.44	6.83	5.41	9.1	11.14	10.9	0.44	6.37	8.84	4.44	4.84	6.39
Am_Rn_000928	7872	XP_004488845.1_DExH-box ATP-dependent RNA helicase DExH12 [Cicer arietinum] XP_004488846.1 DExH-box ATP-dependent RNA helicase DExH12 [Cicer arietinum]	AT1G20960.1_U5 small nuclear ribonucleoprotein helicase, GeneName=emb1507	IPR001650_Helicase, C-terminal; IPR011545_DEAD/DEAH box helicase domain; IPR003593_AAA+ ATPase domain; IPR027417_P-loop containing nucleoside triphosphate hydrolase; IPR014001_Helicase superfamily 1/2, ATP-binding domain; IPR004179_Sec63 domain; IPR014756_Immunoglobulin E-set; IPR041094_Brr2, N-terminal helicase PWI domain; IPR036390_Winged helix DNA-binding domain superfamily	9.58333	8.68333	7.03	8.37333	17.04	7.67	4.04	8.87	10.22	6.96	2.13	9.63	9.33	2.64	8.52	13.96
Am_Rn_000929	7872	XP_045815894.1_ABC transporter D family member 1-like [Trifolium pratense]	AT4G39850.4_peroxisomal ABC transporter 1, GeneName=ABCD1	IPR011527_ABC transporter type 1, transmembrane domain; IPR027417_P-loop containing nucleoside triphosphate hydrolase; IPR003439_ABC transporter-like, ATP-binding domain; IPR036640_ABC transporter type 1, transmembrane domain superfamily; IPR003593_AAA+ ATPase domain	0.0433333	1.43667	0.116667	0.43	0.13	0	0	1.17	2.24	0.9	0.08	0.27	0	0	0.51	0.78
Am_Rn_000930	7872	XP_004487086.2_helicase protein MOM1-like isoform X1 [Cicer arietinum]	AT1G08060.1_ATP-dependent helicase family protein, GeneName=MOM	IPR027417_P-loop containing nucleoside triphosphate hydrolase; IPR016197_Chromo-like domain superfamily; IPR000953_Chromo/chromo shadow domain; IPR000330_SNF2, N-terminal; IPR001965_Zinc finger, PHD-type; IPR011011_Zinc finger, FYVE/PHD-type; IPR001650_Helicase, C-terminal	3.95667	9.80667	13.1767	13.7433	3.28	6.43	2.16	8.59	11.63	9.2	9.24	16	14.29	9.83	13.87	17.53
Am_Rn_000931	7870	XP_004510784.1_mediator of RNA polymerase II transcription subunit 12 [Cicer arietinum] XP_012574178.1 mediator of RNA polymerase II transcription subunit 12 [Cicer arietinum]	AT4G00450.2_RNA polymerase II transcription mediator, GeneName=CCT	.	0	0.34	0.336667	0.163333	0	0	0	1.02	0	0	0	0.49	0.52	0.49	0	0
Am_Rn_000932	7870	AFN88207.1_integrase core domain containing protein [Phaseolus vulgaris]	AT4G23160.3_cysteine-rich RECEPTOR-like kinase, GeneName=CRK8	IPR012337_Ribonuclease H-like superfamily; IPR001584_Integrase, catalytic core; IPR043502_DNA/RNA polymerase superfamily; IPR013103_Reverse transcriptase, RNA-dependent DNA polymerase	0.39	0.886667	0.31	0.58	0.37	0.24	0.56	1.17	0.46	1.03	0.15	0.1	0.68	0.55	0.56	0.63
Am_Rn_000933	7868	XP_027188994.1_valine--tRNA ligase, mitochondrial 1 [Cicer arietinum]	AT1G14610.1_valyl-tRNA synthetase / valine-tRNA ligase (VALRS), GeneName=TWN2	IPR009080_Aminoacyl-tRNA synthetase, class Ia, anticodon-binding; IPR002303_Valine-tRNA ligase; IPR013155_Methionyl/Valyl/Leucyl/Isoleucyl-tRNA synthetase, anticodon-binding; IPR002300_Aminoacyl-tRNA synthetase, class Ia	1.46667	1.12333	3.18333	7.89	2.04	1.25	1.11	0.63	1.64	1.1	4.04	2.8	2.71	7.16	10.17	6.34
Am_Rn_000934	7867	XP_045826038.1_pentatricopeptide repeat-containing protein At1g62260, mitochondrial [Trifolium pratense]	AT1G62260.1_mitochondrial editing factor 9, GeneName=MEF9	IPR011990_Tetratricopeptide-like helical domain superfamily; IPR002885_Pentatricopeptide repeat	0.143333	1.65667	2.01	1.33667	0	0.43	0	1.11	2.2	1.66	1.55	2.69	1.79	0.59	2.4	1.02
Am_Rn_000935	7867	RZB95759.1_Retrovirus-related Pol polyprotein from transposon TNT 1-94 [Glycine soja]	AT4G23160.3_cysteine-rich RECEPTOR-like kinase, GeneName=CRK8	IPR013103_Reverse transcriptase, RNA-dependent DNA polymerase; IPR043502_DNA/RNA polymerase superfamily	4.01333	0.95	0.426667	0.953333	5.75	2.77	3.52	0.59	1.27	0.99	0.15	0.7	0.43	0.47	1.65	0.74
Am_Rn_000936	7864	XP_045806965.1_pre-mRNA-processing-splicing factor 8A isoform X2 [Trifolium pratense]	AT1G80070.1_Pre-mRNA-processing-splicing factor, GeneName=SUS2	IPR019582_RNA recognition motif, spliceosomal PrP8; IPR000555_JAB1/MPN/MOV34 metalloenzyme domain; IPR012591_PRO8NT domain; IPR012337_Ribonuclease H-like superfamily; IPR019580_Pre-mRNA-processing-splicing factor 8, U6-snRNA-binding; IPR019581_Pre-mRNA-processing-splicing factor 8, U5-snRNA-binding; IPR021983_PRP8 domain IV core; IPR012592_PROCN domain; IPR012984_PROCT domain	85.5533	97.8367	56.6967	112.947	98.42	92.24	66	92.55	110.37	90.59	16.82	78.09	75.18	72.21	118.18	148.45
Am_Rn_000937	7861	XP_004495555.1_probable UDP-N-acetylglucosamine--peptide N-acetylglucosaminyltransferase SEC isoform X1 [Cicer arietinum]	AT3G04240.1_Tetratricopeptide repeat (TPR)-like superfamily protein, GeneName=SEC	IPR019734_Tetratricopeptide repeat; IPR011990_Tetratricopeptide-like helical domain superfamily; IPR029489_O-GlcNAc transferase, C-terminal; IPR006597_Sel1-like repeat; IPR001440_Tetratricopeptide repeat 1	13.5267	20.6067	25.79	25.2833	14.28	17.14	9.16	17.33	19.12	25.37	25.51	30.12	21.74	28.04	27.31	20.5
Am_Rn_000938	7860	XP_045830742.1_uncharacterized protein LOC123922041 [Trifolium pratense]	AT3G55020.1_Ypt/Rab-GAP domain of gyp1p superfamily protein	IPR004242_Transposon, En/Spm-like	0.11	0.21	0.173333	0.126667	0.11	0.13	0.09	0.12	0.41	0.1	0.1	0.24	0.18	0.1	0.1	0.18
Am_Rn_000939	7858	XP_045818469.1_uncharacterized protein LOC123911155 [Trifolium pratense]	ATMG00750.1_GAG/POL/ENV polyprotein, GeneName=ORF119	IPR041373_Reverse transcriptase, RNase H-like domain; IPR043502_DNA/RNA polymerase superfamily; IPR012337_Ribonuclease H-like superfamily; IPR005162_Retrotransposon gag domain; IPR000477_Reverse transcriptase domain; IPR041588_Integrase zinc-binding domain; IPR001584_Integrase, catalytic core	0.123333	1.36	0.493333	0.96	0.13	0.17	0.07	2.86	0.6	0.62	0.2	0.62	0.66	1.11	0.78	0.99
Am_Rn_000940	7854	AAF19398.1_dynamin homolog [Astragalus sinicus]	AT1G10290.1_dynamin-like protein 6, GeneName=ADL6	IPR001849_Pleckstrin homology domain; IPR045063_Dynamin, N-terminal; IPR027417_P-loop containing nucleoside triphosphate hydrolase; IPR000375_Dynamin stalk domain; IPR001401_Dynamin, GTPase domain; IPR022812_Dynamin	0.146667	0.426667	0.203333	0.483333	0	0.4	0.04	0	1.28	0	0	0.55	0.06	0.03	1.42	0
Am_Rn_000941	7854	XP_045805325.1_U-box domain-containing protein 44-like [Trifolium pratense]	AT4G23980.2_auxin response factor 9, GeneName=ARF9	IPR003613_U-box domain; IPR016024_Armadillo-type fold; IPR000225_Armadillo	7.94667	12.58	10.9233	19.2067	10.87	9.32	3.65	11.48	13.57	12.69	12.05	10.61	10.11	20.16	17.25	20.21
Am_Rn_000942	7854	RZB95759.1_Retrovirus-related Pol polyprotein from transposon TNT 1-94 [Glycine soja]	AT4G23160.3_cysteine-rich RECEPTOR-like kinase, GeneName=CRK8	IPR036875_Zinc finger, CCHC-type superfamily	0.00666667	0.7	0.496667	0.396667	0	0.02	0	0.45	0.91	0.74	0.23	0.62	0.64	0.21	0.41	0.57
Am_Rn_000943	7853	XP_004490279.1_receptor-like protein 4 [Cicer arietinum]	AT1G25570.1_Di-glucose binding protein with Leucine-rich repeat domain-containing protein	IPR024788_Malectin-like domain	0.17	0.453333	0.316667	0.393333	0.11	0.37	0.03	0.26	0.98	0.12	0	0.37	0.58	0.41	0.41	0.36
Am_Rn_000944	7852	XP_045813221.1_uncharacterized protein LOC123907154 isoform X2 [Trifolium pratense]	AT2G03140.6_alpha/beta-Hydrolases superfamily protein	IPR029058_Alpha/Beta hydrolase fold	0.233333	0.133333	0.703333	0.106667	0	0.07	0.63	0.18	0	0.22	0.5	1.53	0.08	0	0.22	0.1
Am_Rn_000945	7852	MCI06283.1_ribonuclease H protein [Trifolium medium]	AT5G42905.1_Polynucleotidyl transferase, ribonuclease H-like superfamily protein	.	0.136667	0.283333	0.116667	0.16	0.22	0.16	0.03	0.25	0.3	0.3	0	0.35	0	0.12	0.36	0
Am_Rn_000946	7851	PKU87434.1_hypothetical protein MA16_Dca008530 [Dendrobium catenatum]	AT1G19260.1_TTF-type zinc finger protein with HAT dimerization domain-containing protein	.	3.03667	2.6	1.83667	3.12	1.47	4.95	2.69	2.72	3.3	1.78	1.13	2.37	2.01	2.93	3.62	2.81
Am_Rn_000947	7848	PNX93812.1_pentatricopeptide repeat-containing protein at1g56570-like protein [Trifolium pratense]	AT1G56570.1_Tetratricopeptide repeat (TPR)-like superfamily protein, GeneName=PGN	IPR002885_Pentatricopeptide repeat	1.76667	4.35	5.06333	9.66333	2.14	2.29	0.87	4.46	5.43	3.16	5.4	4.57	5.22	7.97	10.23	10.79
Am_Rn_000948	7846	XP_027342866.1_nuclear-pore anchor isoform X1 [Abrus precatorius]	AT1G79280.1_nuclear pore anchor, GeneName=NUA	IPR012929_Nucleoprotein TPR/MLP1	0.126667	0.556667	0.22	0.15	0.1	0.28	0	1	0.48	0.19	0.09	0.1	0.47	0.12	0.33	0
Am_Rn_000949	7844	KYP38573.1_Retrovirus-related Pol polyprotein from transposon TNT 1-94, partial [Cajanus cajan]	AT4G23160.3_cysteine-rich RECEPTOR-like kinase, GeneName=CRK8	IPR043502_DNA/RNA polymerase superfamily; IPR012337_Ribonuclease H-like superfamily; IPR013103_Reverse transcriptase, RNA-dependent DNA polymerase; IPR001584_Integrase, catalytic core; IPR025724_GAG-pre-integrase domain	0.583333	0.396667	0.363333	1.03667	0.92	0.23	0.6	0.44	0.32	0.43	0.33	0.42	0.34	0.61	1.35	1.15
Am_Rn_000950	7844	XP_027331349.1_probable receptor-like protein kinase At3g17420 isoform X1 [Abrus precatorius]	AT1G77280.2_kinase with adenine nucleotide alpha hydrolases-like domain-containing protein	IPR001245_Serine-threonine/tyrosine-protein kinase, catalytic domain; IPR011009_Protein kinase-like domain superfamily	0.08	0.693333	1.46	0.55	0	0.08	0.16	0	1.46	0.62	0.54	2.01	1.83	0.16	0	1.49
Am_Rn_000951	7838	QYF11656.1_ABCC15, partial [Glycyrrhiza glabra]	AT3G60160.2_multidrug resistance-associated protein 9, GeneName=ABCC9	IPR011527_ABC transporter type 1, transmembrane domain; IPR003593_AAA+ ATPase domain; IPR036640_ABC transporter type 1, transmembrane domain superfamily; IPR027417_P-loop containing nucleoside triphosphate hydrolase; IPR003439_ABC transporter-like, ATP-binding domain	0.596667	0.403333	0.503333	0.12	1.02	0.44	0.33	0.4	0.56	0.25	0.04	0.54	0.93	0.04	0	0.32
Am_Rn_000952	7837	XP_004503697.1_puromycin-sensitive aminopeptidase [Cicer arietinum]	AT1G63770.5_Peptidase M1 family protein	IPR045357_Aminopeptidase N-like , N-terminal domain; IPR035414_Peptidase M1, alanyl aminopeptidase, Ig-like fold; IPR024601_Peptidase M1, alanyl aminopeptidase, C-terminal; IPR042097_Aminopeptidase N-like , N-terminal domain superfamliy; IPR012779_Peptidase M1, alanyl aminopeptidase; IPR014782_Peptidase M1, membrane alanine aminopeptidase; IPR001930_Peptidase M1, alanine aminopeptidase/leukotrien…	0.29	0.526667	0.583333	0.16	0.26	0.27	0.34	0.65	0.34	0.59	0.25	0.43	1.07	0.22	0.04	0.22
Am_Rn_000953	7835	XP_045787572.1_uncharacterized protein LOC123882956 isoform X2 [Trifolium pratense]	.	IPR008979_Galactose-binding-like domain superfamily	1.21667	0.836667	0.44	1.17	0.99	1.45	1.21	0.58	0.6	1.33	0.32	0.32	0.68	1.62	1.3	0.59
Am_Rn_000954	7835	XP_027357556.1_probable serine/threonine-protein kinase SIS8 isoform X1 [Abrus precatorius]	AT1G73660.1_protein tyrosine kinase family protein	.	0.473333	0.32	0.113333	0.216667	0.58	0.5	0.34	0.17	0.5	0.29	0.04	0.07	0.23	0.22	0.35	0.08
Am_Rn_000955	7830	XP_027344205.1_DExH-box ATP-dependent RNA helicase DExH3 [Abrus precatorius]	AT1G48650.1_DEA(D/H)-box RNA helicase family protein	IPR027417_P-loop containing nucleoside triphosphate hydrolase; IPR001650_Helicase, C-terminal; IPR014001_Helicase superfamily 1/2, ATP-binding domain; IPR007502_Helicase-associated domain; IPR011545_DEAD/DEAH box helicase domain; IPR014720_Double-stranded RNA-binding domain; IPR011709_Domain of unknown function DUF1605	7.58333	7.63667	5.18	9.63	6.62	7.35	8.78	5.73	6.58	10.6	2.68	3.84	9.02	8.68	5.32	14.89
Am_Rn_000956	7828	XP_004492571.1_serine/threonine-protein kinase AtPK2/AtPK19-like [Cicer arietinum] XP_027188240.1 serine/threonine-protein kinase AtPK2/AtPK19-like [Cicer arietinum]	AT3G08720.2_serine/threonine protein kinase 2, GeneName=S6K2	IPR000719_Protein kinase domain; IPR011009_Protein kinase-like domain superfamily; IPR000961_AGC-kinase, C-terminal; IPR017892_Protein kinase, C-terminal	0.536667	0.353333	0.146667	0.163333	0.15	0	1.46	0.53	0.12	0.41	0.27	0.06	0.11	0.26	0.15	0.08
Am_Rn_000957	7828	BAG72151.1_hypothetical protein [Lotus japonicus]	ATMG00860.1_DNA/RNA polymerases superfamily protein, GeneName=ORF158	IPR021109_Aspartic peptidase domain superfamily; IPR043502_DNA/RNA polymerase superfamily; IPR000477_Reverse transcriptase domain; IPR045358_Ty3 transposon capsid-like protein; IPR016197_Chromo-like domain superfamily; IPR041577_Reverse transcriptase/retrotransposon-derived protein, RNase H-like domain; IPR041588_Integrase zinc-binding domain; IPR012337_Ribonuclease H-like superfamily	2.99333	2.43	4.49333	5.18333	3.7	3.56	1.72	3.31	2.95	1.03	6.87	5.28	1.33	8.81	3.84	2.9
Am_Rn_000958	7826	GAU48536.1_hypothetical protein TSUD_282880 [Trifolium subterraneum]	AT1G43760.1_DNAse I-like superfamily protein	IPR026960_Reverse transcriptase zinc-binding domain; IPR043502_DNA/RNA polymerase superfamily; IPR036691_Endonuclease/exonuclease/phosphatase superfamily; IPR000477_Reverse transcriptase domain	8.88	0	0.383333	0	5.22	17.25	4.17	0	0	0	0	1.15	0	0	0	0
Am_Rn_000959	7822	PNX96991.1_retrotransposon-related protein [Trifolium pratense]	AT1G53430.2_Leucine-rich repeat transmembrane protein kinase	.	0.336667	0.793333	0.62	2.51667	0.32	0.47	0.22	0.6	1.29	0.49	0.29	0.93	0.64	2.08	3.98	1.49
Am_Rn_000960	7820	XP_012574596.1_transcription initiation factor TFIID subunit 1 isoform X2 [Cicer arietinum]	AT1G32750.1_HAC13 protein (HAC13), GeneName=HAF01	IPR022591_Transcription initiation factor TFIID subunit 1, domain of unknown function; IPR000626_Ubiquitin-like domain; IPR001487_Bromodomain; IPR036427_Bromodomain-like superfamily; IPR029071_Ubiquitin-like domain superfamily	6.98333	12.0933	8.05667	9.82	7.52	5.63	7.8	11.86	12.41	12.01	6.09	8.67	9.41	9.19	9.34	10.93
Am_Rn_000961	7820	TKY74225.1_Histone-lysine N-methyltransferase ASHH2 [Spatholobus suberectus]	AT1G77300.1_histone-lysine N-methyltransferase, GeneName=EFS	IPR001214_SET domain; IPR011124_Zinc finger, CW-type; IPR006560_AWS domain	0.133333	0	0.106667	0	0.16	0.24	0	0	0	0	0	0	0.32	0	0	0
Am_Rn_000962	7819	CAC43237.1_lipoxygenase [Sesbania rostrata]	AT1G17420.1_lipoxygenase 3, GeneName=LOX3	IPR001246_Lipoxygenase, plant; IPR013819_Lipoxygenase, C-terminal; IPR036226_Lipoxigenase, C-terminal domain superfamily	58.2067	43.0167	14.45	50.4067	48.73	59.66	66.23	36.47	46.24	46.34	5	18.01	20.34	56.21	56.28	38.73
Am_Rn_000963	7815	XP_045823963.1_FACT complex subunit SPT16 [Trifolium pratense] PNY09386.1 FACT complex subunit spt16-like protein [Trifolium pratense] PNY14966.1 FACT complex subunit spt16-like protein [Trifolium pratense] PNY15807.1 FACT complex subunit spt16-like protein [Trifolium pratense]	AT4G10710.1_global transcription factor C, GeneName=SPT16	IPR029148_FACT complex subunit Spt16, N-terminal lobe domain; IPR013953_FACT complex subunit Spt16 domain; IPR036005_Creatinase/aminopeptidase-like; IPR013719_Domain of unknown function DUF1747; IPR000994_Peptidase M24	0.103333	0.126667	0.206667	0.466667	0	0.31	0	0	0.13	0.25	0	0.24	0.38	0	0.78	0.62
Am_Rn_000964	7814	XP_004503803.1_auxin response factor 2B [Cicer arietinum]	AT5G62000.2_auxin response factor 2, GeneName=ARF2	IPR015300_DNA-binding pseudobarrel domain superfamily; IPR003340_B3 DNA binding domain; IPR033389_AUX/IAA domain; IPR010525_Auxin response factor domain	0.266667	0.203333	0.04	0.106667	0	0.46	0.34	0.34	0.05	0.22	0.04	0.05	0.03	0.19	0.06	0.07
Am_Rn_000965	7814	XP_024642142.2_uncharacterized protein LOC112422744 [Medicago truncatula]	AT4G20410.1_gamma-soluble NSF attachment protein, GeneName=GSNAP	.	0.263333	0.756667	0.5	1.01	0.24	0.31	0.24	1	0.7	0.57	0.28	0.63	0.59	1.55	0.68	0.8
Am_Rn_000966	7812	RHN65171.1_putative RNA helicase [Medicago truncatula]	AT1G58060.1_RNA helicase family protein	IPR011709_Domain of unknown function DUF1605	0.163333	0.223333	0.276667	0.34	0.07	0.14	0.28	0.29	0.2	0.18	0.22	0.32	0.29	0.26	0.43	0.33
Am_Rn_000967	7811	TKY55969.1_Lysine-specific demethylase JMJ25 [Spatholobus suberectus]	AT4G00990.1_Transcription factor jumonji (jmjC) domain-containing protein	IPR017956_AT hook, DNA-binding motif	1.43667	2.81	1.57	5.23	1.35	2.07	0.89	2.15	4.08	2.2	0.9	1.66	2.15	3.81	4.72	7.16
Am_Rn_000968	7810	XP_020217117.1_serine/threonine-protein kinase TOR [Cajanus cajan]	AT1G50030.1_target of rapamycin, GeneName=TOR	IPR003151_PIK-related kinase, FAT; IPR016024_Armadillo-type fold; IPR009076_FKBP12-rapamycin binding domain; IPR000403_Phosphatidylinositol 3-/4-kinase, catalytic domain; IPR036738_FKBP12-rapamycin binding domain superfamily; IPR024585_Domain of unknown function DUF3385, target of rapamycin protein; IPR011009_Protein kinase-like domain superfamily	0.603333	1.35	2.11	1.50667	0.8	0.88	0.13	1.39	1.64	1.02	0.89	2.62	2.82	0.78	1.69	2.05
Am_Rn_000969	7806	XP_027344205.1_DExH-box ATP-dependent RNA helicase DExH3 [Abrus precatorius]	AT1G48650.1_DEA(D/H)-box RNA helicase family protein	IPR027417_P-loop containing nucleoside triphosphate hydrolase; IPR001650_Helicase, C-terminal; IPR014001_Helicase superfamily 1/2, ATP-binding domain; IPR007502_Helicase-associated domain; IPR011545_DEAD/DEAH box helicase domain; IPR014720_Double-stranded RNA-binding domain; IPR011709_Domain of unknown function DUF1605	2.69	4.58667	2.80333	4.73333	3.49	4.58	0	7.48	6.28	0	3.79	4.62	0	7.95	6.25	0
Am_Rn_000970	7805	BAG72151.1_hypothetical protein [Lotus japonicus]	AT1G65890.1_acyl activating enzyme 12, GeneName=AAE12	IPR043502_DNA/RNA polymerase superfamily; IPR045358_Ty3 transposon capsid-like protein; IPR000477_Reverse transcriptase domain; IPR016197_Chromo-like domain superfamily; IPR021109_Aspartic peptidase domain superfamily; IPR041577_Reverse transcriptase/retrotransposon-derived protein, RNase H-like domain; IPR041588_Integrase zinc-binding domain; IPR012337_Ribonuclease H-like superfamily	7.81667	44.89	20.4133	10.4833	11.76	8.86	2.83	39.12	59.82	35.73	8.54	24.17	28.53	13.38	10.1	7.97
Am_Rn_000971	7803	KYP42130.1_Copia protein [Cajanus cajan]	AT1G30450.4_cation-chloride co-transporter 1, GeneName=CCC1	IPR004841_Amino acid permease/ SLC12A domain	0.38	0.343333	0.47	0.253333	0.24	0.52	0.38	0.39	0.3	0.34	0.19	0.65	0.57	0.2	0.16	0.4
Am_Rn_000972	7801	XP_020220284.1_U3 small nucleolar RNA-associated protein 25 [Cajanus cajan] KYP62387.1 Digestive organ expansion factor isogeny [Cajanus cajan]	AT1G17690.1_U3 small nucleolar RNA-associated protein, GeneName=NOF1	IPR010678_U3 small nucleolar RNA-associated protein 25	0.486667	0.273333	0.233333	0.25	0.16	0.05	1.25	0.23	0.21	0.38	0.29	0.25	0.16	0.2	0.28	0.27
Am_Rn_000973	7798	XP_004507222.1_external alternative NAD(P)H-ubiquinone oxidoreductase B3, mitochondrial-like [Cicer arietinum]	AT4G05020.2_NAD(P)H dehydrogenase B2, GeneName=NDB2	IPR000535_Major sperm protein (MSP) domain; IPR008962_PapD-like superfamily	1.56333	0.136667	0.27	0.393333	1.59	0.8	2.3	0	0.41	0	0.45	0.22	0.14	0.23	0.3	0.65
Am_Rn_000974	7797	XP_004485591.1_uncharacterized protein LOC101489448 [Cicer arietinum] XP_004485592.1 uncharacterized protein LOC101489448 [Cicer arietinum]	AT1G02170.1_metacaspase 1, GeneName=MC1	IPR013087_Zinc finger C2H2-type; IPR016177_DNA-binding domain superfamily	5.94667	5.84333	6.49667	6.16	12.76	3.44	1.64	4.98	6.66	5.89	4.47	8.56	6.46	3.29	8.71	6.48
Am_Rn_000975	7796	XP_004492763.1_ATP-dependent helicase BRM-like [Cicer arietinum]	AT2G46020.3_transcription regulatory protein SNF2, GeneName=BRM	IPR027417_P-loop containing nucleoside triphosphate hydrolase; IPR001650_Helicase, C-terminal; IPR014978_Glutamine-Leucine-Glutamine, QLQ; IPR014001_Helicase superfamily 1/2, ATP-binding domain; IPR000330_SNF2, N-terminal	0	0	0	0.18	0	0	0	0	0	0	0	0	0	0	0	0.54
Am_Rn_000976	7790	XP_004510784.1_mediator of RNA polymerase II transcription subunit 12 [Cicer arietinum] XP_012574178.1 mediator of RNA polymerase II transcription subunit 12 [Cicer arietinum]	AT4G00450.2_RNA polymerase II transcription mediator, GeneName=CCT	IPR019035_Mediator complex, subunit Med12	15.58	12.6333	8.06667	11.6467	20.56	12.31	13.87	9.9	15.12	12.88	2.29	10.95	10.96	7.81	14.12	13.01
Am_Rn_000977	7790	XP_027331831.1_protein trichome birefringence-like 38 isoform X2 [Abrus precatorius]	AT2G34070.1_TRICHOME BIREFRINGENCE-LIKE 37, GeneName=TBL37	IPR002885_Pentatricopeptide repeat	0.396667	0.543333	0.696667	0.6	0.29	0.87	0.03	0.72	0.48	0.43	0.34	0.88	0.87	0.38	0.92	0.5
Am_Rn_000978	7785	PRQ52345.1_putative RNA-directed DNA polymerase [Rosa chinensis]	AT3G62580.1_Late embryogenesis abundant protein (LEA) family protein	IPR001878_Zinc finger, CCHC-type; IPR043502_DNA/RNA polymerase superfamily; IPR001584_Integrase, catalytic core; IPR036875_Zinc finger, CCHC-type superfamily; IPR012337_Ribonuclease H-like superfamily; IPR025724_GAG-pre-integrase domain; IPR013103_Reverse transcriptase, RNA-dependent DNA polymerase	4.48	6.52667	4.44667	2.73	10.39	1.61	1.44	7.53	5.23	6.82	4.25	3.82	5.27	2.92	2.3	2.97
Am_Rn_000979	7777	XP_012573521.1_dicer-like protein 4 isoform X5 [Cicer arietinum]	AT5G20320.1_dicer-like 4, GeneName=DCL4	IPR036389_Ribonuclease III, endonuclease domain superfamily; IPR014001_Helicase superfamily 1/2, ATP-binding domain; IPR003100_PAZ domain; IPR001650_Helicase, C-terminal; IPR027417_P-loop containing nucleoside triphosphate hydrolase; IPR000999_Ribonuclease III domain; IPR006935_Helicase/UvrB, N-terminal	24.0933	11.7333	8.36333	22.3733	16.91	48.44	6.93	5.58	18.94	10.68	1.01	12.66	11.42	3.48	31.84	31.8
Am_Rn_000980	7777	YP_009861005.1_photosystem II 47 kDa protein [Spatholobus suberectus] QKI32269.1 photosystem II 47 kDa protein [Spatholobus suberectus]	ATCG00680.1_photosystem II reaction center protein B, GeneName=PSBB	IPR017486_Photosystem II CP47 reaction centre protein; IPR036001_Photosystem antenna protein-like superfamily; IPR000932_Photosystem antenna protein-like	0.263333	0.303333	0.59	0.603333	0	0	0.79	0.29	0	0.62	0.28	0	1.49	1.41	0	0.4
Am_Rn_000981	7774	XP_045808627.1_glutamate synthase [NADH], amyloplastic isoform X1 [Trifolium pratense]	AT5G53460.1_NADH-dependent glutamate synthase 1, GeneName=GLT1	IPR029055_Nucleophile aminohydrolases, N-terminal; IPR017932_Glutamine amidotransferase type 2 domain; IPR006982_Glutamate synthase, central-N; IPR002932_Glutamate synthase domain	31.1633	8.42333	11.3633	8.53667	51.08	13.85	28.56	10.7	6.84	7.73	2.76	15.84	15.49	4.54	15	6.07
Am_Rn_000982	7771	XP_013465575.2_mediator of RNA polymerase II transcription subunit 15a isoform X2 [Medicago truncatula]	AT1G15780.1_mediator of RNA polymerase II transcription subunit 15a-like protein, GeneName=NRB4	IPR036529_Coactivator CBP, KIX domain superfamily; IPR036546_Mediator complex subunit 15, KIX domain	1.39	1.23	0.993333	0.74	1.22	0.39	2.56	1.68	0.97	1.04	0.79	1.01	1.18	0.73	0.92	0.57
Am_Rn_000983	7771	PNX55057.1_elongation factor 1-alpha, partial [Trifolium pratense]	AT1G18560.1_BED zinc finger and hAT dimerization domain-containing protein	IPR008906_HAT, C-terminal dimerisation domain; IPR012337_Ribonuclease H-like superfamily	0.04	0.286667	0.263333	0.176667	0.09	0.03	0	0.27	0.32	0.27	0.13	0.32	0.34	0.18	0.22	0.13
Am_Rn_000984	7768	XP_004511755.1_uncharacterized protein LOC101495071 [Cicer arietinum]	AT4G17140.3_pleckstrin homology (PH) domain-containing protein	IPR009543_Vacuolar protein sorting-associated protein 13, SHR-binding domain	0.3	0.98	0.616667	0.423333	0.33	0.24	0.33	0.96	1.11	0.87	0.3	0.76	0.79	0.42	0.44	0.41
Am_Rn_000985	7765	XP_012568040.1_nuclear pore complex protein GP210 isoform X2 [Cicer arietinum]	AT5G40480.1_embryo defective 3012, GeneName=EMB3012	IPR008964_Invasin/intimin cell-adhesion fragments; IPR003343_Bacterial Ig-like, group 2	0.0466667	0.363333	0.193333	0.213333	0.11	0	0.03	0.29	0.6	0.2	0.14	0.15	0.29	0.27	0.3	0.07
Am_Rn_000986	7764	XP_003597382.1_uncharacterized protein C24B11.05 [Medicago truncatula] XP_039686794.1 uncharacterized protein C24B11.05 [Medicago truncatula] AES67633.1 haloacid dehalogenase-like hydrolase [Medicago truncatula] AFK36402.1 unknown [Medicago truncatula] RHN76108.1 putative pyridoxal phosphatase [Medicago truncatula]	AT5G59480.1_Haloacid dehalogenase-like hydrolase (HAD) superfamily protein	IPR005162_Retrotransposon gag domain	2.92	8.16667	3.29	5.21333	1.05	7.71	0	8.61	15.89	0	1.14	8.73	0	6.33	9.31	0
Am_Rn_000987	7761	KEH44134.1_white-brown-complex ABC transporter family protein [Medicago truncatula]	AT2G01320.6_ABC-2 type transporter family protein, GeneName=ABCG7	IPR027417_P-loop containing nucleoside triphosphate hydrolase; IPR003439_ABC transporter-like, ATP-binding domain	0.226667	0.633333	0.39	0.286667	0.09	0.38	0.21	0.77	0.74	0.39	0.08	0.66	0.43	0.29	0.18	0.39
Am_Rn_000988	7760	XP_004505650.1_uncharacterized protein LOC101506771 isoform X2 [Cicer arietinum]	AT1G76140.2_Prolyl oligopeptidase family protein	IPR023302_Peptidase S9A, N-terminal domain; IPR002470_Peptidase S9A, prolyl oligopeptidase; IPR001375_Peptidase S9, prolyl oligopeptidase, catalytic domain; IPR029058_Alpha/Beta hydrolase fold	0.0166667	0.423333	0.123333	0.233333	0	0.03	0.02	0.32	0.65	0.3	0.06	0.19	0.12	0.31	0.22	0.17
Am_Rn_000989	7758	TKY61337.1_Exportin-4 protein [Spatholobus suberectus]	AT3G04490.2_exportin-4 protein	IPR014877_Exportin-1, C-terminal; IPR016024_Armadillo-type fold	0.0466667	0.28	0.2	0.38	0.1	0.04	0	0.28	0.35	0.21	0.15	0.33	0.12	0.28	0.22	0.64
Am_Rn_000990	7757	XP_004508792.1_uncharacterized protein LOC101496590 isoform X2 [Cicer arietinum]	AT3G47910.2_Ubiquitin carboxyl-terminal hydrolase-related protein	IPR006865_Domain of unknown function DUF629; IPR038765_Papain-like cysteine peptidase superfamily; IPR001394_Peptidase C19, ubiquitin carboxyl-terminal hydrolase; IPR006866_Domain of unknown function DUF627, N-terminal	0.193333	0.28	0.0866667	0.25	0	0	0.58	0.37	0.47	0	0.26	0	0	0	0.3	0.45
Am_Rn_000991	7756	RHN71246.1_putative RNA-directed DNA polymerase [Medicago truncatula]	AT4G23160.3_cysteine-rich RECEPTOR-like kinase, GeneName=CRK8	IPR012337_Ribonuclease H-like superfamily; IPR013103_Reverse transcriptase, RNA-dependent DNA polymerase; IPR043502_DNA/RNA polymerase superfamily	0.37	0.503333	0.57	0.61	0.14	0.27	0.7	0.39	0.77	0.35	0.43	0.63	0.65	1.04	0.41	0.38
Am_Rn_000992	7752	XP_039690261.1_protein FAR1-RELATED SEQUENCE 5-like isoform X1 [Medicago truncatula]	AT4G38180.1_FAR1-related sequence 5, GeneName=FRS5	IPR004330_FAR1 DNA binding domain; IPR006564_Zinc finger, PMZ-type; IPR018289_MULE transposase domain	0.28	0	0.106667	0.146667	0.43	0.25	0.16	0	0	0	0	0	0.32	0.27	0	0.17
Am_Rn_000993	7750	PNX95999.1_UDP-glycosyltransferase 74B1-like protein [Trifolium pratense]	AT1G24100.1_UDP-glucosyl transferase 74B1, GeneName=UGT74B1	IPR001611_Leucine-rich repeat	52.74	10.6433	30.1633	9.21667	11.75	37.84	108.63	8.68	11.82	11.43	26.72	30.46	33.31	6.7	9.47	11.48
Am_Rn_000994	7748	PNY02430.1_retrovirus-related Pol polyprotein from transposon TNT 1-94, partial [Trifolium pratense]	ATMG00820.1_Reverse transcriptase (RNA-dependent DNA polymerase), GeneName=ORF170	IPR013103_Reverse transcriptase, RNA-dependent DNA polymerase	0.63	0.58	0.513333	0.476667	0.41	0.91	0.57	0.52	0.56	0.66	0.09	1.03	0.42	0.3	0.73	0.4
Am_Rn_000995	7745	TKY55527.1_Lon protease-like 2 [Spatholobus suberectus]	AT5G47040.1_lon protease 2, GeneName=LON2	IPR007021_Domain of unknown function DUF659; IPR008906_HAT, C-terminal dimerisation domain; IPR012337_Ribonuclease H-like superfamily	0.57	0.57	1.06667	1.67	0.32	0.81	0.58	0.59	0.39	0.73	1.22	1.17	0.81	3.5	0.32	1.19
Am_Rn_000996	7742	XP_003597382.1_uncharacterized protein C24B11.05 [Medicago truncatula] XP_039686794.1 uncharacterized protein C24B11.05 [Medicago truncatula] AES67633.1 haloacid dehalogenase-like hydrolase [Medicago truncatula] AFK36402.1 unknown [Medicago truncatula] RHN76108.1 putative pyridoxal phosphatase [Medicago truncatula]	AT5G59480.1_Haloacid dehalogenase-like hydrolase (HAD) superfamily protein	IPR005162_Retrotransposon gag domain	5.64667	50.38	13.0067	6.72333	0.41	5.38	11.15	27.05	95.79	28.3	3.49	29.65	5.88	9.28	6.87	4.02
Am_Rn_000997	7742	XP_033139453.1_uncharacterized protein LOC117131412 isoform X1 [Brassica rapa]	AT3G11130.1_Clathrin, heavy chain	IPR036875_Zinc finger, CCHC-type superfamily; IPR041577_Reverse transcriptase/retrotransposon-derived protein, RNase H-like domain; IPR018061_Retropepsins; IPR000477_Reverse transcriptase domain; IPR001878_Zinc finger, CCHC-type; IPR043502_DNA/RNA polymerase superfamily	18.2667	6.27	4.53667	8.37667	24.95	13.59	16.26	5.37	7.01	6.43	3.74	4.61	5.26	6.01	10.05	9.07
Am_Rn_000998	7739	PNX92911.1_Ty3/gypsy retrotransposon protein [Trifolium pratense]	AT3G57280.1_Transmembrane proteins 14C	IPR043502_DNA/RNA polymerase superfamily; IPR005162_Retrotransposon gag domain; IPR000477_Reverse transcriptase domain; IPR021109_Aspartic peptidase domain superfamily; IPR041577_Reverse transcriptase/retrotransposon-derived protein, RNase H-like domain	0.756667	2.29	1.59	2.19667	0.59	0.8	0.88	1.76	2.79	2.32	0.5	2.12	2.15	1.94	2.57	2.08
Am_Rn_000999	7739	KYP34729.1_Retrovirus-related Pol polyprotein from transposon TNT 1-94, partial [Cajanus cajan]	AT4G20520.1_RNA binding / RNA-directed DNA polymerase	IPR036047_F-box-like domain superfamily	0.336667	0.5	0.51	0.34	0.38	0.29	0.34	0.44	0.64	0.42	0.07	0.78	0.68	0.22	0.07	0.73
Am_Rn_001000	7738	KAG4910148.1_hypothetical protein JHK87_056264 [Glycine soja]	AT1G68370.1_Chaperone DnaJ-domain superfamily protein, GeneName=ARG1	IPR001623_DnaJ domain; IPR036869_Chaperone J-domain superfamily	0.243333	0.47	0.353333	0.35	0.33	0.21	0.19	0.56	0.44	0.41	0.21	0.43	0.42	0.38	0.35	0.32
Am_Rn_001001	7737	MCH81232.1_root phototropism protein 2-like [Trifolium medium]	AT2G30520.1_Phototropic-responsive NPH3 family protein, GeneName=RPT2	IPR027356_NPH3 domain; IPR000210_BTB/POZ domain; IPR011333_SKP1/BTB/POZ domain superfamily	0	3.67333	18.6267	1.47333	0	0	0	2.7	5.72	2.6	10.05	25.25	20.58	2.48	0.66	1.28
Am_Rn_001002	7736	XP_004498161.1_probable pre-mRNA-splicing factor ATP-dependent RNA helicase DEAH5 [Cicer arietinum] XP_012570575.1 probable pre-mRNA-splicing factor ATP-dependent RNA helicase DEAH5 [Cicer arietinum] XP_012570576.1 probable pre-mRNA-splicing factor ATP-dependent RNA helicase DEAH5 [Cicer arietinum] XP_027189551.1 probable pre-mRNA-splicing factor ATP-dependent RNA helicase DEAH5 [Cicer arietinum]…	AT3G26560.1_ATP-dependent RNA helicase	IPR007502_Helicase-associated domain; IPR011709_Domain of unknown function DUF1605; IPR012340_Nucleic acid-binding, OB-fold; IPR014001_Helicase superfamily 1/2, ATP-binding domain; IPR011545_DEAD/DEAH box helicase domain; IPR001650_Helicase, C-terminal; IPR022967_RNA-binding domain, S1; IPR027417_P-loop containing nucleoside triphosphate hydrolase; IPR003029_S1 domain	0	1.05667	1.01	0.226667	0	0	0	0.65	1.47	1.05	1.1	1.93	0	0.68	0	0
Am_Rn_001003	7727	XP_045793050.1_histidine kinase CKI1-like [Trifolium pratense]	AT2G47430.1_Signal transduction histidine kinase, GeneName=CKI1	IPR003661_Signal transduction histidine kinase, dimerisation/phosphoacceptor domain; IPR036890_Histidine kinase/HSP90-like ATPase superfamily; IPR003594_Histidine kinase/HSP90-like ATPase; IPR004358_Signal transduction histidine kinase-related protein, C-terminal; IPR036097_Signal transduction histidine kinase, dimerisation/phosphoacceptor domain superfamily	0.0666667	0.263333	0.446667	0.18	0.2	0	0	0.48	0.31	0	0.33	0.68	0.33	0	0	0.54
Am_Rn_001004	7726	XP_045823020.1_alpha-N-acetylglucosaminidase isoform X1 [Trifolium pratense]	AT5G13690.1_alpha-N-acetylglucosaminidase family / NAGLU family, GeneName=CYL1	IPR024733_Alpha-N-acetylglucosaminidase, tim-barrel domain; IPR024732_Alpha-N-acetylglucosaminidase, C-terminal	0.183333	0.83	0.426667	0.32	0.09	0.23	0.23	0.78	0.69	1.02	0	0.64	0.64	0.41	0.09	0.46
Am_Rn_001005	7726	XP_004494118.1_E3 ubiquitin-protein ligase UPL7 [Cicer arietinum] XP_004494119.1 E3 ubiquitin-protein ligase UPL7 [Cicer arietinum] XP_012569641.1 E3 ubiquitin-protein ligase UPL7 [Cicer arietinum] XP_027188231.1 E3 ubiquitin-protein ligase UPL7 [Cicer arietinum]	AT3G53090.1_ubiquitin-protein ligase 7, GeneName=UPL7	IPR000569_HECT domain; IPR035983_HECT, E3 ligase catalytic domain	1.54	2.74667	2.41333	2.84	1.5	2.05	1.07	1.81	3.18	3.25	0.56	3.46	3.22	2.33	3.42	2.77
Am_Rn_001006	7726	RZB70463.1_Transposon Ty3-G Gag-Pol polyprotein [Glycine soja]	ATMG00860.1_DNA/RNA polymerases superfamily protein, GeneName=ORF158	IPR041588_Integrase zinc-binding domain; IPR043502_DNA/RNA polymerase superfamily; IPR041373_Reverse transcriptase, RNase H-like domain; IPR012337_Ribonuclease H-like superfamily; IPR001584_Integrase, catalytic core	0.833333	0.2	0.61	1.46667	0.26	1.2	1.04	0.09	0.39	0.12	0.44	0.8	0.59	1.88	1.48	1.04
Am_Rn_001007	7725	TKY63773.1_BEACH domain-containing protein lvsC [Spatholobus suberectus]	AT2G45540.1_WD-40 repeat family protein / beige-like protein	IPR001680_WD40 repeat; IPR036322_WD40-repeat-containing domain superfamily; IPR036372_BEACH domain superfamily; IPR000409_BEACH domain	18.6233	12.88	8.92	15.6733	18.8	18.86	18.21	6.74	16.22	15.68	3.61	12.12	11.03	8.42	19.16	19.44
Am_Rn_001008	7724	XP_004507222.1_external alternative NAD(P)H-ubiquinone oxidoreductase B3, mitochondrial-like [Cicer arietinum]	AT4G05020.2_NAD(P)H dehydrogenase B2, GeneName=NDB2	IPR000535_Major sperm protein (MSP) domain; IPR008962_PapD-like superfamily	1.01	0.0133333	0.0633333	0.123333	1.09	0.82	1.12	0	0	0.04	0.04	0.07	0.08	0	0.19	0.18
Am_Rn_001009	7723	GAU26239.1_hypothetical protein TSUD_224300 [Trifolium subterraneum]	AT4G20520.1_RNA binding / RNA-directed DNA polymerase	IPR036691_Endonuclease/exonuclease/phosphatase superfamily	0.11	0.0433333	0.276667	0.0933333	0.28	0.03	0.02	0.03	0	0.1	0.24	0.37	0.22	0.12	0.16	0
Am_Rn_001010	7719	XP_004498769.1_trafficking protein particle complex II-specific subunit 120 homolog [Cicer arietinum]	AT5G11040.1_TRS120, GeneName=TRS120	IPR013935_TRAPP II complex, Trs120	0.01	0	0.38	0.31	0.03	0	0	0	0	0	0	1.14	0	0.09	0	0.84
Am_Rn_001011	7717	KAH1144980.1_hypothetical protein GYH30_041013 [Glycine max] KRH09836.2 hypothetical protein GLYMA_15G013800v4 [Glycine max]	AT1G52360.2_Coatomer, beta' subunit	IPR036322_WD40-repeat-containing domain superfamily; IPR006692_Coatomer, WD associated region; IPR020472_G-protein beta WD-40 repeat; IPR016453_Coatomer beta' subunit (COPB2); IPR001680_WD40 repeat	0.0566667	0	0	0.106667	0	0.17	0	0	0	0	0	0	0	0	0.32	0
Am_Rn_001012	7717	XP_027351596.1_putative receptor-like protein kinase At5g39000 isoform X1 [Abrus precatorius]	AT5G28680.1_Malectin/receptor-like protein kinase family protein, GeneName=ANX2	IPR011009_Protein kinase-like domain superfamily; IPR001245_Serine-threonine/tyrosine-protein kinase, catalytic domain	0.0833333	0.213333	0.153333	0.346667	0	0.06	0.19	0.25	0.24	0.15	0.04	0.15	0.27	0.3	0.28	0.46
Am_Rn_001013	7716	KEH16379.1_dual-specificity kinase domain protein [Medicago truncatula]	AT3G13690.1_kinase with adenine nucleotide alpha hydrolases-like domain-containing protein	IPR001245_Serine-threonine/tyrosine-protein kinase, catalytic domain; IPR011009_Protein kinase-like domain superfamily	0	0.04	0.0466667	0.0233333	0	0	0	0	0.1	0.02	0	0.14	0	0	0	0.07
Am_Rn_001014	7713	GAU11620.1_hypothetical protein TSUD_346120 [Trifolium subterraneum]	AT1G55850.1_cellulose synthase like E1, GeneName=CSLE1	IPR012337_Ribonuclease H-like superfamily; IPR016197_Chromo-like domain superfamily; IPR005162_Retrotransposon gag domain; IPR043502_DNA/RNA polymerase superfamily; IPR000477_Reverse transcriptase domain; IPR023780_Chromo domain; IPR041588_Integrase zinc-binding domain; IPR021109_Aspartic peptidase domain superfamily; IPR041577_Reverse transcriptase/retrotransposon-derived protein, RNase H-like d…	2.40667	1.16	1.32	1.26667	0.99	3.03	3.2	1.26	0.86	1.36	0.46	1.68	1.82	1.06	1.44	1.3
Am_Rn_001015	7712	XP_012568040.1_nuclear pore complex protein GP210 isoform X2 [Cicer arietinum]	AT5G40480.1_embryo defective 3012, GeneName=EMB3012	IPR008964_Invasin/intimin cell-adhesion fragments; IPR003343_Bacterial Ig-like, group 2	0	0	0	0.103333	0	0	0	0	0	0	0	0	0	0	0	0.31
Am_Rn_001016	7712	XP_004507755.1_cellulose synthase A catalytic subunit 7 [UDP-forming] [Cicer arietinum]	AT5G17420.1_Cellulose synthase family protein, GeneName=IRX3	IPR029044_Nucleotide-diphospho-sugar transferases; IPR005150_Cellulose synthase; IPR027934_Cellulose synthase, RING-type zinc finger	0.376667	1.63333	5.87667	3.13667	0.58	0.2	0.35	1.26	2.19	1.45	3.8	7.18	6.65	4.09	2.93	2.39
Am_Rn_001017	7709	XP_004500526.1_PKS-NRPS hybrid synthetase CHGG_01239-like [Cicer arietinum]	AT3G48860.3_coiled-coil protein	IPR018289_MULE transposase domain	0.34	0.753333	0.556667	0.393333	0.13	0.24	0.65	1.41	0.85	0	0.22	0.98	0.47	0.24	0.8	0.14
Am_Rn_001018	7709	PNX92398.1_Ty3/gypsy retrotransposon protein [Trifolium pratense]	ATMG00860.1_DNA/RNA polymerases superfamily protein, GeneName=ORF158	IPR041577_Reverse transcriptase/retrotransposon-derived protein, RNase H-like domain; IPR005162_Retrotransposon gag domain; IPR021109_Aspartic peptidase domain superfamily; IPR000477_Reverse transcriptase domain; IPR043502_DNA/RNA polymerase superfamily	0.136667	0.41	0.366667	0.296667	0.16	0.11	0.14	0.12	0.83	0.28	0.25	0.65	0.2	0.17	0.48	0.24
Am_Rn_001019	7708	XP_027187598.1_TMV resistance protein N-like [Cicer arietinum]	AT5G36930.3_Disease resistance protein (TIR-NBS-LRR class) family	IPR027417_P-loop containing nucleoside triphosphate hydrolase; IPR002182_NB-ARC; IPR000157_Toll/interleukin-1 receptor homology (TIR) domain; IPR035897_Toll/interleukin-1 receptor homology (TIR) domain superfamily; IPR036390_Winged helix DNA-binding domain superfamily	0.833333	0.923333	0.243333	4.23333	0.08	1.09	1.33	1.74	0.59	0.44	0	0.39	0.34	8.44	0.98	3.28
Am_Rn_001020	7708	GAU20382.1_hypothetical protein TSUD_12010 [Trifolium subterraneum]	AT2G01730.1_cleavage and polyadenylation specificity factor 73 kDa subunit-II, GeneName=CPSF73-II	IPR022712_Beta-Casp domain; IPR001279_Metallo-beta-lactamase; IPR011108_Zn-dependent metallo-hydrolase, RNA specificity domain; IPR036866_Ribonuclease Z/Hydroxyacylglutathione hydrolase-like	0.203333	0.183333	0.143333	0.03	0	0.21	0.4	0.18	0.3	0.07	0.09	0.12	0.22	0.09	0	0
Am_Rn_001021	7706	XP_004511757.1_uncharacterized protein LOC101495726 [Cicer arietinum]	AT5G47020.1_MraZ	.	1.58	1.56667	0.75	1.91	0.61	2.73	1.4	2.23	1.5	0.97	0.12	1.27	0.86	1.89	1.54	2.3
Am_Rn_001022	7704	XP_012570649.1_glutamate synthase [NADH], amyloplastic isoform X1 [Cicer arietinum]	AT5G53460.1_NADH-dependent glutamate synthase 1, GeneName=GLT1	IPR017932_Glutamine amidotransferase type 2 domain; IPR023753_FAD/NAD(P)-binding domain; IPR029055_Nucleophile aminohydrolases, N-terminal; IPR012220_Glutamate synthase, eukaryotic; IPR002932_Glutamate synthase domain; IPR036485_Glutamate synthase, alpha subunit, C-terminal domain superfamily; IPR006982_Glutamate synthase, central-N; IPR028261_Dihydroprymidine dehydrogenase domain II; IPR006005_G…	425.067	61.2767	100.357	71.96	576.77	392.3	306.13	42.94	76.87	64.02	25.55	154.31	121.21	50.26	86.06	79.56
Am_Rn_001023	7704	RHN43371.1_putative cytosol alanyl aminopeptidase [Medicago truncatula]	AT1G63770.4_Peptidase M1 family protein	IPR024601_Peptidase M1, alanyl aminopeptidase, C-terminal; IPR035414_Peptidase M1, alanyl aminopeptidase, Ig-like fold; IPR014782_Peptidase M1, membrane alanine aminopeptidase	0.57	0.35	0.29	0.406667	0.79	0.16	0.76	0.27	0.48	0.3	0	0.39	0.48	0.38	0.52	0.32
[truncated: 148,973 more rows]
