# Supplementary material for: Enhancing transcriptome analysis in medicinal plants: multiple unigene sets in Astragalus membranaceus
Source: Front Plant Sci. 2024 Feb 7;15:1301526. doi: 10.3389/fpls.2024.1301526 (PMC10879423; doi:10.3389/fpls.2024.1301526)
Supplement: Supplementary file 6 [file Table_5.xlsx]

## Sheet: Table S6
Supplementary Table 6. Expression information of unigene set-3 (Trinity-assembled contigs) (Page-1).
Unigene ID	Unigene length	Annotation description			Average TPM				Roots			Leaves			Flowers			Stems
		NR blast	Araport11	InterPro	Roots	Leaves	Flowers	Stems	R1	R2	R3	L1	L2	L3	F1	F2	F3	S1	S2	S3
Am_Tr_000001	1539	MCH87000.1_serine-rich adhesin for platelets-like [Trifolium medium]	AT4G27300.1_S-locus lectin protein kinase family protein	IPR008395_Agenet-like domain	0	0	0	0	0	0	0	0	0	0	0	0	0	0	0	0
Am_Tr_000002	2016	XP_013462051.1_protein cereblon [Medicago truncatula] KEH36086.1 ATP-dependent protease LA (lon) domain protein [Medicago truncatula] RHN70901.1 putative ATP-dependent protease La (LON), substrate-binding domain, PUA-like protein [Medicago truncatula]	AT2G25740.2_ATP-dependent protease La (LON) domain protein	IPR003111_Lon, substrate-binding domain; IPR015947_PUA-like superfamily	1.39667	5.12333	2.14333	2.34667	1.28	2.14	0.77	7.24	3.66	4.47	2.39	4.01	0.03	0.22	1.89	4.93
Am_Tr_000003	1687	MCH87000.1_serine-rich adhesin for platelets-like [Trifolium medium]	AT4G27300.1_S-locus lectin protein kinase family protein	IPR008395_Agenet-like domain	7.19333	6.77667	3.15	3.60333	15.24	0.49	5.85	7.63	3.03	9.67	2.56	1.99	4.9	4.58	1.31	4.92
Am_Tr_000004	1403	XP_004514630.1_protein cereblon-like isoform X3 [Cicer arietinum]	AT2G25740.1_ATP-dependent protease La (LON) domain protein	IPR003111_Lon, substrate-binding domain; IPR015947_PUA-like superfamily	0	0.01	1.59	0.906667	0	0	0	0.01	0	0.02	0	0	4.77	2.72	0	0
Am_Tr_000005	418	XP_027360402.1_eukaryotic translation initiation factor 3 subunit G-like [Abrus precatorius]	AT3G11400.1_eukaryotic translation initiation factor 3G1, GeneName=EIF3G1	.	10.8833	7.90667	13.75	21.6967	12.9	3.85	15.9	3.3	7.58	12.84	20.16	11.72	9.37	23.3	24.08	17.71
Am_Tr_000006	630	XP_027360402.1_eukaryotic translation initiation factor 3 subunit G-like [Abrus precatorius]	AT3G11400.1_eukaryotic translation initiation factor 3G1, GeneName=EIF3G1	.	31.73	41.0933	35.1867	27.5567	52.86	23.22	19.11	45.59	32.65	45.04	25.44	38.11	42.01	28.86	25.16	28.65
Am_Tr_000007	837	XP_002324209.1_uncharacterized protein LOC7463779 [Populus trichocarpa] PNS92652.1 hypothetical protein POPTR_018G046700 [Populus trichocarpa]	AT2G25740.1_ATP-dependent protease La (LON) domain protein	.	0.36	0.72	0.52	0.52	0.23	0.67	0.18	1.08	0.88	0.2	0.5	0.5	0.56	0.42	0.67	0.47
Am_Tr_000008	1276	XP_004501096.2_protein cereblon [Cicer arietinum]	AT2G25740.1_ATP-dependent protease La (LON) domain protein	IPR003111_Lon, substrate-binding domain; IPR015947_PUA-like superfamily	5.91	7.16	1.68	4.54333	6.76	7.1	3.87	4.32	9.71	7.45	2.1	2.28	0.66	1.35	8.38	3.9
Am_Tr_000009	2148	MCH87000.1_serine-rich adhesin for platelets-like [Trifolium medium]	AT4G17330.3_G2484-1 protein, GeneName=G2484-1	IPR008395_Agenet-like domain	10.7267	11.3133	8.61333	14.47	8.52	15.65	8.01	10.83	13.81	9.3	5.77	11.17	8.9	11.84	17.89	13.68
Am_Tr_000010	1889	XP_004501096.2_protein cereblon [Cicer arietinum]	AT2G25740.1_ATP-dependent protease La (LON) domain protein	IPR015947_PUA-like superfamily; IPR003111_Lon, substrate-binding domain	6.94333	5.58333	7.00333	6.93	7.57	7.18	6.08	2.89	6.48	7.38	5.57	6.32	9.12	10.88	6.06	3.85
Am_Tr_000011	1986	MCH87000.1_serine-rich adhesin for platelets-like [Trifolium medium]	AT4G17330.3_G2484-1 protein, GeneName=G2484-1	IPR008395_Agenet-like domain	12.77	22.7433	14.9967	19.35	14.02	12.89	11.4	21.57	21.48	25.18	7.7	17.24	20.05	19.61	19.92	18.52
Am_Tr_000012	2373	XP_004498460.1_protein cereblon-like isoform X1 [Cicer arietinum]	AT2G25740.1_ATP-dependent protease La (LON) domain protein	IPR003111_Lon, substrate-binding domain; IPR004910_Yippee/Mis18/Cereblon; IPR015947_PUA-like superfamily	9.87	4.79667	4.77667	3.93	9.77	10.99	8.85	4.05	6.53	3.81	3.68	5.03	5.62	4.2	4.22	3.37
Am_Tr_000013	2413	XP_004498460.1_protein cereblon-like isoform X1 [Cicer arietinum]	AT2G25740.1_ATP-dependent protease La (LON) domain protein	IPR003111_Lon, substrate-binding domain; IPR015947_PUA-like superfamily	1.43667	0.696667	0.863333	1.30667	1.89	0.87	1.55	0.21	0.42	1.46	1.01	1.08	0.5	0	1.51	2.41
Am_Tr_000014	3002	RDY09544.1_Protein phosphatase 2C 16, partial [Mucuna pruriens]	AT1G72770.1_HYPERSENSITIVE TO ABA1, GeneName=HAB1	IPR036457_PPM-type phosphatase domain superfamily; IPR001932_PPM-type phosphatase domain	0	0	0	0	0	0	0	0	0	0	0	0	0	0	0	0
Am_Tr_000015	2584	RDY09544.1_Protein phosphatase 2C 16, partial [Mucuna pruriens]	AT1G72770.1_HYPERSENSITIVE TO ABA1, GeneName=HAB1	IPR036457_PPM-type phosphatase domain superfamily; IPR001932_PPM-type phosphatase domain	17.41	50.2867	27.1	24.25	20.13	14.99	17.11	47.29	49.59	53.98	23.32	29.53	28.45	31.34	24.47	16.94
Am_Tr_000016	3112	XP_025613393.1_protein phosphatase 2C 50 [Arachis hypogaea] XP_025613394.1 protein phosphatase 2C 50 [Arachis hypogaea] XP_025613395.1 protein phosphatase 2C 50 [Arachis hypogaea] XP_025613396.1 protein phosphatase 2C 50 [Arachis hypogaea] QHO30305.1 Protein phosphatase 2C [Arachis hypogaea] QHO30306.1 Protein phosphatase 2C [Arachis hypogaea] RYR42256.1 hypothetical protein Ahy_A08g038722 [Arach…	AT1G72770.1_HYPERSENSITIVE TO ABA1, GeneName=HAB1	IPR001932_PPM-type phosphatase domain; IPR036457_PPM-type phosphatase domain superfamily	6.68	25.23	15.0633	14.5433	5.31	8.85	5.88	25.41	22.16	28.12	10.88	18.72	15.59	17.01	15.14	11.48
Am_Tr_000017	2642	PNY08820.1_protein phosphatase 2C 16-like, partial [Trifolium pratense]	AT1G72770.2_HYPERSENSITIVE TO ABA1, GeneName=HAB1	IPR001932_PPM-type phosphatase domain; IPR036457_PPM-type phosphatase domain superfamily	0.0233333	0.0333333	0.186667	0	0	0.07	0	0	0.1	0	0.48	0	0.08	0	0	0
Am_Tr_000018	3099	PNY04141.1_protein phosphatase 2C 16-like [Trifolium pratense]	AT1G72770.1_HYPERSENSITIVE TO ABA1, GeneName=HAB1	IPR036457_PPM-type phosphatase domain superfamily	1.89333	7.58333	3.46333	2.32333	1.78	1.55	2.35	4.22	8.01	10.52	3.3	2.35	4.74	2.16	2.79	2.02
Am_Tr_000019	3007	XP_025613393.1_protein phosphatase 2C 50 [Arachis hypogaea] XP_025613394.1 protein phosphatase 2C 50 [Arachis hypogaea] XP_025613395.1 protein phosphatase 2C 50 [Arachis hypogaea] XP_025613396.1 protein phosphatase 2C 50 [Arachis hypogaea] QHO30305.1 Protein phosphatase 2C [Arachis hypogaea] QHO30306.1 Protein phosphatase 2C [Arachis hypogaea] RYR42256.1 hypothetical protein Ahy_A08g038722 [Arach…	AT1G72770.1_HYPERSENSITIVE TO ABA1, GeneName=HAB1	IPR001932_PPM-type phosphatase domain; IPR036457_PPM-type phosphatase domain superfamily	0	1.85	0.32	0	0	0	0	0.95	3.02	1.58	0.96	0	0	0	0	0
Am_Tr_000020	2897	RDY09544.1_Protein phosphatase 2C 16, partial [Mucuna pruriens]	AT1G72770.1_HYPERSENSITIVE TO ABA1, GeneName=HAB1	IPR036457_PPM-type phosphatase domain superfamily; IPR001932_PPM-type phosphatase domain	0	0	0	0	0	0	0	0	0	0	0	0	0	0	0	0
Am_Tr_000021	4179	XP_004498844.1_protein phosphatase 2C 50-like [Cicer arietinum] XP_004498845.1 protein phosphatase 2C 50-like [Cicer arietinum]	AT1G17550.1_homology to ABI2, GeneName=HAB2	IPR001932_PPM-type phosphatase domain; IPR036457_PPM-type phosphatase domain superfamily	8.91667	38.2933	20.38	22.61	7.68	11.62	7.45	36.06	40.47	38.35	9.43	26.79	24.92	21.15	26.88	19.8
Am_Tr_000022	1621	AXC25272.1_aminopeptidase P1-like protein [Lotus japonicus]	AT4G36760.3_aminopeptidase P1, GeneName=APP1	.	10.9167	15.6467	10.93	10.03	19.94	7.36	5.45	11.27	13.31	22.36	15.38	6.27	11.14	9.8	11.36	8.93
Am_Tr_000023	1557	XP_020216390.1_aminopeptidase P1 [Cajanus cajan] KYP66722.1 Xaa-Pro aminopeptidase 1 [Cajanus cajan]	AT4G36760.3_aminopeptidase P1, GeneName=APP1	.	2.87	6.87667	2.11333	4.46333	3.53	4	1.08	9.25	6.51	4.87	0.43	2.28	3.63	3.89	5.38	4.12
Am_Tr_000024	768	XP_040864330.1_uncharacterized protein LOC100793247 isoform X5 [Glycine max]	AT1G78650.1_DNA-directed DNA polymerase, GeneName=POLD3	IPR019038_DNA polymerase delta subunit 3	0.87	3.47	2.79	3.66667	1.6	0.19	0.82	4.02	2.68	3.71	1.12	3.91	3.34	1.82	3.24	5.94
Am_Tr_000025	2088	AXC25272.1_aminopeptidase P1-like protein [Lotus japonicus]	AT4G36760.3_aminopeptidase P1, GeneName=APP1	.	3.75333	2.23333	1.76	2.04333	3.52	2.16	5.58	1.21	2.71	2.78	0.88	1.8	2.6	2.25	1.57	2.31
Am_Tr_000026	1263	XP_004512011.1_aminopeptidase P1 [Cicer arietinum]	AT4G36760.3_aminopeptidase P1, GeneName=APP1	IPR000587_Creatinase, N-terminal; IPR029149_Creatinase/Aminopeptidase P/Spt16, N-terminal	76.6	58.61	36.5633	45.07	88.49	96.89	44.42	55.68	58.62	61.53	16.02	45.97	47.7	36.64	48.34	50.23
Am_Tr_000027	1505	AXC25272.1_aminopeptidase P1-like protein [Lotus japonicus]	AT4G36760.3_aminopeptidase P1, GeneName=APP1	.	5.27333	1.74	1.35	1.01667	10.04	4.09	1.69	1.72	3.12	0.38	0.48	1.85	1.72	1.08	0.85	1.12
Am_Tr_000028	1763	XP_020216390.1_aminopeptidase P1 [Cajanus cajan] KYP66722.1 Xaa-Pro aminopeptidase 1 [Cajanus cajan]	AT4G36760.3_aminopeptidase P1, GeneName=APP1	IPR036005_Creatinase/aminopeptidase-like; IPR000994_Peptidase M24	2.92333	2.72667	2.52333	3.57333	3	3.5	2.27	2.08	3	3.1	2.73	3.11	1.73	3.66	3.46	3.6
Am_Tr_000029	2410	XP_004512011.1_aminopeptidase P1 [Cicer arietinum]	AT4G36760.1_aminopeptidase P1, GeneName=APP1	IPR000994_Peptidase M24; IPR036005_Creatinase/aminopeptidase-like; IPR032416_Peptidase M24, C-terminal domain	41.71	47.88	32.21	37.9167	61.45	34.35	29.33	45.74	45.79	52.11	31.45	32.01	33.17	37.77	41.96	34.02
Am_Tr_000030	781	XP_026287116.1_mediator of RNA polymerase II transcription subunit 28-like [Frankliniella occidentalis]	.	.	0	0	0.683333	0	0	0	0	0	0	0	1.41	0.64	0	0	0	0
Am_Tr_000031	1621	AFK45810.1_unknown [Lotus japonicus]	AT2G02410.3_yacP-like NYN domain protein	IPR010298_Protein of unknown function DUF901	2.25333	2.15	1.91667	2.37667	2.21	1.99	2.56	0.18	2.58	3.69	0.27	4.48	1	0.46	4.66	2.01
Am_Tr_000032	2131	AFK45810.1_unknown [Lotus japonicus]	AT2G02410.3_yacP-like NYN domain protein	IPR010298_Protein of unknown function DUF901	0.526667	1.17333	1.04333	0.45	0	1.47	0.11	0	1.06	2.46	0	0.48	2.65	0	0.57	0.78
Am_Tr_000033	1041	KAH1116035.1_hypothetical protein GYH30_045797, partial [Glycine max] KAH1116036.1 hypothetical protein GYH30_045797, partial [Glycine max]	AT2G02410.5_yacP-like NYN domain protein	.	0.293333	0.406667	0.473333	0.56	0.43	0.3	0.15	0.4	0.23	0.59	0	0.58	0.84	0.03	1.16	0.49
Am_Tr_000034	395	.	.	.	0	10.4	1.87	0.353333	0	0	0	9.33	8.43	13.44	0.44	0.5	4.67	0.53	0	0.53
Am_Tr_000035	1012	XP_025614012.1_uncharacterized protein LOC112706763 [Arachis hypogaea] QHO51185.1 uncharacterized protein DS421_1g28720 [Arachis hypogaea]	AT2G02410.3_yacP-like NYN domain protein	IPR010298_Protein of unknown function DUF901	13.68	9.66	7.57	7.97	25.72	9.39	5.93	9.1	10.75	9.13	4.11	9.41	9.19	7.66	6.7	9.55
Am_Tr_000036	3182	AFK45810.1_unknown [Lotus japonicus]	AT2G02410.5_yacP-like NYN domain protein	IPR010298_Protein of unknown function DUF901	1.63667	1.71667	1.79667	1.62667	2.43	0.91	1.57	2.3	2.14	0.71	2.73	1.34	1.32	1.68	1.32	1.88
Am_Tr_000037	2044	TKY53866.1_YacP protein [Spatholobus suberectus]	AT2G02410.6_yacP-like NYN domain protein	.	0.423333	1.11	0.786667	0.533333	0.3	0.97	0	0.94	1.16	1.23	0.31	0.44	1.61	1.6	0	0
Am_Tr_000038	2554	TKY53866.1_YacP protein [Spatholobus suberectus]	AT2G02410.6_yacP-like NYN domain protein	.	0.326667	0.336667	0.75	1.19333	0	0	0.98	0	1.01	0	0	2.18	0.07	0	1.75	1.83
Am_Tr_000039	3267	TKY63694.1_Methionine aminopeptidase 1A [Spatholobus suberectus]	AT2G45240.2_methionine aminopeptidase 1A, GeneName=MAP1A	.	0.206667	0.35	0.0966667	0.486667	0.39	0	0.23	0.93	0.12	0	0.29	0	0	1.46	0	0
Am_Tr_000040	1572	XP_004497067.1_uncharacterized protein LOC101491135 isoform X1 [Cicer arietinum]	AT1G25375.1_Metallo-hydrolase/oxidoreductase superfamily protein	IPR001279_Metallo-beta-lactamase; IPR041516_LACTB2, winged helix domain; IPR036866_Ribonuclease Z/Hydroxyacylglutathione hydrolase-like	7.48	19.61	15.5567	23.12	4.41	13.75	4.28	17.77	21.48	19.58	16.71	16.68	13.28	21.99	24.43	22.94
Am_Tr_000041	3631	KEH44203.1_metallo-beta-lactamase superfamily protein [Medicago truncatula]	AT1G25375.1_Metallo-hydrolase/oxidoreductase superfamily protein	IPR001279_Metallo-beta-lactamase; IPR041516_LACTB2, winged helix domain; IPR036866_Ribonuclease Z/Hydroxyacylglutathione hydrolase-like	1.37667	5.97667	3.29333	6.05	0	4.13	0	6.18	8.53	3.22	0	5.34	4.54	7.98	6.46	3.71
Am_Tr_000042	1054	KEH44202.1_metallo-beta-lactamase superfamily protein [Medicago truncatula]	AT1G25375.1_Metallo-hydrolase/oxidoreductase superfamily protein	.	3.25	6.51	4.19333	6.93667	1.22	7.02	1.51	4.82	7.36	7.35	2.02	5.44	5.12	3.82	5.31	11.68
Am_Tr_000043	1281	XP_004497067.1_uncharacterized protein LOC101491135 isoform X1 [Cicer arietinum]	AT1G25375.1_Metallo-hydrolase/oxidoreductase superfamily protein	IPR001279_Metallo-beta-lactamase; IPR036866_Ribonuclease Z/Hydroxyacylglutathione hydrolase-like; IPR041516_LACTB2, winged helix domain	1.4	2.22	2.35333	3.77333	1.41	2.59	0.2	2.23	1.97	2.46	2.21	3.4	1.45	3.42	4.03	3.87
Am_Tr_000044	3605	KEH44203.1_metallo-beta-lactamase superfamily protein [Medicago truncatula]	AT1G25375.1_Metallo-hydrolase/oxidoreductase superfamily protein	IPR001279_Metallo-beta-lactamase; IPR041516_LACTB2, winged helix domain; IPR036866_Ribonuclease Z/Hydroxyacylglutathione hydrolase-like	0.9	0.976667	0.696667	3.11	1.63	0	1.07	0	0	2.93	2.09	0	0	0	4.29	5.04
Am_Tr_000045	1452	TKY50856.1_Beta-lactamase protein 2 [Spatholobus suberectus]	AT1G25375.1_Metallo-hydrolase/oxidoreductase superfamily protein	IPR036866_Ribonuclease Z/Hydroxyacylglutathione hydrolase-like; IPR001279_Metallo-beta-lactamase; IPR041516_LACTB2, winged helix domain	1.5	3.74667	2.38667	3.9	0.47	3.64	0.39	2.94	5.34	2.96	1.96	2.34	2.86	5.34	0.96	5.4
Am_Tr_000046	1755	TKY63697.1_Methionine aminopeptidase 1A [Spatholobus suberectus]	AT2G45240.1_methionine aminopeptidase 1A, GeneName=MAP1A	IPR036005_Creatinase/aminopeptidase-like; IPR002467_Peptidase M24A, methionine aminopeptidase, subfamily 1; IPR000994_Peptidase M24; IPR001714_Peptidase M24, methionine aminopeptidase; IPR031615_MYND-like zinc finger	38.4533	28.3167	30.1967	31.7267	42.68	36.48	36.2	27.06	28.86	29.03	31.15	31.76	27.68	27.44	32.91	34.83
Am_Tr_000047	2221	TKY63697.1_Methionine aminopeptidase 1A [Spatholobus suberectus]	AT2G45240.2_methionine aminopeptidase 1A, GeneName=MAP1A	IPR000994_Peptidase M24; IPR001714_Peptidase M24, methionine aminopeptidase; IPR031615_MYND-like zinc finger; IPR002467_Peptidase M24A, methionine aminopeptidase, subfamily 1; IPR036005_Creatinase/aminopeptidase-like	0.713333	3.48333	1.83667	1.60667	1.22	0.29	0.63	5.06	2.61	2.78	2.38	1.07	2.06	1.42	1	2.4
Am_Tr_000048	2139	TKY63697.1_Methionine aminopeptidase 1A [Spatholobus suberectus]	AT2G45240.1_methionine aminopeptidase 1A, GeneName=MAP1A	IPR031615_MYND-like zinc finger; IPR001714_Peptidase M24, methionine aminopeptidase; IPR036005_Creatinase/aminopeptidase-like; IPR000994_Peptidase M24	0.0733333	1.01	0.683333	0.886667	0	0.22	0	1.34	1.11	0.58	0.56	1.02	0.47	1.29	0.76	0.61
Am_Tr_000049	2605	TKY63697.1_Methionine aminopeptidase 1A [Spatholobus suberectus]	AT2G45240.2_methionine aminopeptidase 1A, GeneName=MAP1A	IPR031615_MYND-like zinc finger; IPR001714_Peptidase M24, methionine aminopeptidase; IPR036005_Creatinase/aminopeptidase-like; IPR000994_Peptidase M24	0.65	0.58	0.436667	0.61	0.53	0.54	0.88	0	0.85	0.89	0	0.93	0.38	0.84	0.99	0
Am_Tr_000050	2043	TKY63697.1_Methionine aminopeptidase 1A [Spatholobus suberectus]	AT2G45240.1_methionine aminopeptidase 1A, GeneName=MAP1A	IPR031615_MYND-like zinc finger; IPR001714_Peptidase M24, methionine aminopeptidase; IPR036005_Creatinase/aminopeptidase-like; IPR000994_Peptidase M24	0.68	0.883333	0.716667	1.37667	0	0.41	1.63	0.46	1.11	1.08	0.33	0	1.82	1.59	1.88	0.66
Am_Tr_000051	1666	XP_004511940.1_methionine aminopeptidase 1D, chloroplastic/mitochondrial [Cicer arietinum]	AT4G37040.1_methionine aminopeptidase 1D, GeneName=MAP1D	IPR002467_Peptidase M24A, methionine aminopeptidase, subfamily 1; IPR036005_Creatinase/aminopeptidase-like; IPR001714_Peptidase M24, methionine aminopeptidase; IPR000994_Peptidase M24	10.5767	30.8467	13.61	14.1333	12.13	10.32	9.28	33.48	23.19	35.87	15.81	12.25	12.77	16.68	10.89	14.83
Am_Tr_000052	340	KAG5087074.1_hypothetical protein JHK82_054471 [Glycine max]	.	.	0.21	0.22	0.433333	1.24	0	0	0.63	0	0	0.66	0.63	0	0.67	2.01	0.22	1.49
Am_Tr_000053	2541	XP_004511940.1_methionine aminopeptidase 1D, chloroplastic/mitochondrial [Cicer arietinum]	AT4G37040.1_methionine aminopeptidase 1D, GeneName=MAP1D	IPR000994_Peptidase M24; IPR001714_Peptidase M24, methionine aminopeptidase; IPR036005_Creatinase/aminopeptidase-like; IPR002467_Peptidase M24A, methionine aminopeptidase, subfamily 1	0.403333	2.46	1.25667	1.55333	0.3	0.48	0.43	1.77	3.79	1.82	0.32	1.16	2.29	1.71	1.34	1.61
Am_Tr_000054	910	.	.	.	0.6	0.396667	0.436667	0.6	0.84	0.84	0.12	0.13	0.46	0.6	0.81	0.26	0.24	0.73	0.52	0.55
Am_Tr_000055	941	.	.	.	0	0	0	0	0	0	0	0	0	0	0	0	0	0	0	0
Am_Tr_000056	791	.	.	.	0	0	0.0466667	0	0	0	0	0	0	0	0.14	0	0	0	0	0
Am_Tr_000057	439	.	.	.	0	8.8	2.21333	0.286667	0	0	0	10.45	8.22	7.73	0.71	4.06	1.87	0.43	0	0.43
Am_Tr_000058	482	.	.	.	0.526667	0.386667	0.546667	1.43667	0	0.37	1.21	0.35	0.81	0	0	1.02	0.62	2.51	0.37	1.43
Am_Tr_000059	2462	KAH1217018.1_hypothetical protein GmHk_13G037763 [Glycine max]	AT5G58200.1_Calcineurin-like metallo-phosphoesterase superfamily protein	.	0	1.86	0.286667	1.48333	0	0	0	0.54	3.28	1.76	0.72	0	0.14	1.26	1.36	1.83
Am_Tr_000060	1331	XP_004507709.1_uncharacterized protein LOC101506346 isoform X1 [Cicer arietinum]	AT5G58200.2_Calcineurin-like metallo-phosphoesterase superfamily protein	IPR029052_Metallo-dependent phosphatase-like; IPR027629_Putative protein phosphatase DevT-like; IPR004843_Calcineurin-like phosphoesterase domain, ApaH type	8.82333	22.0833	11.73	17.4633	9.77	10.7	6	21.32	20.18	24.75	15.22	10.19	9.78	15.9	15.68	20.81
Am_Tr_000061	3209	XP_027192541.1_uncharacterized protein LOC101506346 isoform X2 [Cicer arietinum]	AT5G58200.2_Calcineurin-like metallo-phosphoesterase superfamily protein	.	0.616667	0.506667	0.833333	0.603333	1.12	0.73	0	0.92	0.6	0	1.01	1.49	0	0.89	0.92	0
Am_Tr_000062	2860	XP_029126061.1_uncharacterized protein LOC109792784 isoform X2 [Cajanus cajan]	AT5G58200.1_Calcineurin-like metallo-phosphoesterase superfamily protein	.	0.746667	3.54667	2.55	3.19333	0.65	1.01	0.58	4.09	4.44	2.11	0.44	3.98	3.23	2.87	3.56	3.15
Am_Tr_000063	1877	TKY54728.1_hydrolase protein [Spatholobus suberectus]	AT5G58200.2_Calcineurin-like metallo-phosphoesterase superfamily protein	.	0.0733333	0.153333	0.82	0.5	0.18	0	0.04	0	0	0.46	0.76	0.45	1.25	0.28	0.39	0.83
Am_Tr_000064	1928	XP_027192541.1_uncharacterized protein LOC101506346 isoform X2 [Cicer arietinum]	AT5G58200.2_Calcineurin-like metallo-phosphoesterase superfamily protein	.	0.106667	0	0.07	0	0.32	0	0	0	0	0	0	0.21	0	0	0	0
Am_Tr_000065	2072	XP_029126061.1_uncharacterized protein LOC109792784 isoform X2 [Cajanus cajan]	AT5G58200.2_Calcineurin-like metallo-phosphoesterase superfamily protein	.	0.3	3.59	0.423333	0.956667	0	0.72	0.18	3.88	2.61	4.28	0	0	1.27	1.65	0.93	0.29
Am_Tr_000066	2048	XP_029126061.1_uncharacterized protein LOC109792784 isoform X2 [Cajanus cajan]	AT5G58200.1_Calcineurin-like metallo-phosphoesterase superfamily protein	.	0	0.543333	0	0.12	0	0	0	0	0	1.63	0	0	0	0	0	0.36
Am_Tr_000067	1993	XP_029126061.1_uncharacterized protein LOC109792784 isoform X2 [Cajanus cajan]	AT5G58200.2_Calcineurin-like metallo-phosphoesterase superfamily protein	.	0.293333	0.45	1.32667	0.893333	0.6	0.28	0	0.39	0.96	0	1.08	2.44	0.46	0	1.59	1.09
Am_Tr_000068	2470	XP_029126061.1_uncharacterized protein LOC109792784 isoform X2 [Cajanus cajan]	AT5G58200.1_Calcineurin-like metallo-phosphoesterase superfamily protein	.	0.536667	0.763333	0	0.586667	0.28	1.11	0.22	0.93	1.36	0	0	0	0	0.43	1.33	0
Am_Tr_000069	3156	XP_027192541.1_uncharacterized protein LOC101506346 isoform X2 [Cicer arietinum]	AT5G58200.2_Calcineurin-like metallo-phosphoesterase superfamily protein	.	0.12	0.89	1.38667	1.14667	0	0	0.36	0.68	0.82	1.17	0.32	1.62	2.22	0.72	0.85	1.87
Am_Tr_000070	1729	XP_029126061.1_uncharacterized protein LOC109792784 isoform X2 [Cajanus cajan]	AT5G58200.1_Calcineurin-like metallo-phosphoesterase superfamily protein	IPR029052_Metallo-dependent phosphatase-like; IPR004843_Calcineurin-like phosphoesterase domain, ApaH type	0	1.01333	0.803333	0.546667	0	0	0	1.64	0	1.4	2.41	0	0	1.05	0	0.59
Am_Tr_000071	1650	XP_020207803.1_uncharacterized protein LOC109792784 isoform X1 [Cajanus cajan]	AT5G58200.2_Calcineurin-like metallo-phosphoesterase superfamily protein	.	1.14	1.66333	1.32333	0.473333	0.93	0.87	1.62	3.03	1.96	0	1.45	1.75	0.77	0.91	0.51	0
Am_Tr_000072	1114	PRQ39450.1_putative protein kinase TKL-CTR1-DRK-2 family [Rosa chinensis]	AT3G06640.2_PAS domain-containing protein tyrosine kinase family protein	.	3.61	9.17667	6.84333	4.94667	5.09	3.66	2.08	8.07	9.84	9.62	9.88	5.74	4.91	3.94	5.02	5.88
Am_Tr_000073	3902	KAG4397825.1_hypothetical protein GLYMA_10G217900v4 [Glycine max] KAH1139478.1 hypothetical protein GYH30_028739 [Glycine max]	AT1G22710.1_sucrose-proton symporter 2, GeneName=SUC2	IPR036259_MFS transporter superfamily; IPR005989_Sucrose/H+ symporter, plant	0	0	0	0	0	0	0	0	0	0	0	0	0	0	0	0
Am_Tr_000074	4081	KAG4397825.1_hypothetical protein GLYMA_10G217900v4 [Glycine max] KAH1139478.1 hypothetical protein GYH30_028739 [Glycine max]	AT1G22710.1_sucrose-proton symporter 2, GeneName=SUC2	IPR036259_MFS transporter superfamily; IPR005989_Sucrose/H+ symporter, plant	3.67333	3.80333	1.27333	1.63333	5.78	0.89	4.35	3.85	4.6	2.96	2.44	0.66	0.72	2.3	0.74	1.86
Am_Tr_000075	3806	KAG4397825.1_hypothetical protein GLYMA_10G217900v4 [Glycine max] KAH1139478.1 hypothetical protein GYH30_028739 [Glycine max]	AT1G22710.1_sucrose-proton symporter 2, GeneName=SUC2	IPR036259_MFS transporter superfamily; IPR005989_Sucrose/H+ symporter, plant	27.77	29.3367	34.1433	16.4167	30.97	22.61	29.73	24.89	27.44	35.68	37.62	36.87	27.94	20.76	17.43	11.06
Am_Tr_000076	2461	XP_007143634.1_hypothetical protein PHAVU_007G088200g [Phaseolus vulgaris] ESW15628.1 hypothetical protein PHAVU_007G088200g [Phaseolus vulgaris]	AT1G22710.1_sucrose-proton symporter 2, GeneName=SUC2	IPR005989_Sucrose/H+ symporter, plant; IPR036259_MFS transporter superfamily	0.55	12.9	15.4233	1.31667	0	1.65	0	7.21	22.42	9.07	4.61	19.74	21.92	1.07	0.35	2.53
Am_Tr_000077	2747	XP_007143634.1_hypothetical protein PHAVU_007G088200g [Phaseolus vulgaris] ESW15628.1 hypothetical protein PHAVU_007G088200g [Phaseolus vulgaris]	AT1G22710.1_sucrose-proton symporter 2, GeneName=SUC2	IPR036259_MFS transporter superfamily; IPR005989_Sucrose/H+ symporter, plant	151.617	156.827	178.487	73.5367	167.85	137.1	149.9	178.23	135.14	157.11	161.75	217.37	156.34	64.89	83.26	72.46
Am_Tr_000078	4187	KAG4397825.1_hypothetical protein GLYMA_10G217900v4 [Glycine max] KAH1139478.1 hypothetical protein GYH30_028739 [Glycine max]	AT1G22710.1_sucrose-proton symporter 2, GeneName=SUC2	IPR036259_MFS transporter superfamily; IPR005989_Sucrose/H+ symporter, plant	5.99667	6.69333	2.83667	2.16333	8.8	4.77	4.42	8.14	6.07	5.87	2.93	3.03	2.55	2.77	2.59	1.13
Am_Tr_000079	2842	XP_007143634.1_hypothetical protein PHAVU_007G088200g [Phaseolus vulgaris] ESW15628.1 hypothetical protein PHAVU_007G088200g [Phaseolus vulgaris]	AT1G22710.1_sucrose-proton symporter 2, GeneName=SUC2	IPR036259_MFS transporter superfamily; IPR005989_Sucrose/H+ symporter, plant	0.87	0.946667	0.383333	0.0733333	0.72	0.58	1.31	1.03	0.47	1.34	0.19	0.57	0.39	0.22	0	0
Am_Tr_000080	1544	MCI21543.1_sucrose transport protein SUF1 [Trifolium medium]	AT1G71880.1_sucrose-proton symporter 1, GeneName=SUC1	.	0.09	1.05333	0.376667	0.266667	0	0.27	0	0.33	1.82	1.01	0.39	0	0.74	0.54	0	0.26
Am_Tr_000081	2159	XP_045815662.1_sucrose transport protein SUC8-like [Trifolium pratense]	AT1G71880.1_sucrose-proton symporter 1, GeneName=SUC1	IPR036259_MFS transporter superfamily; IPR005989_Sucrose/H+ symporter, plant	27.34	138.367	43.5933	56.9633	10.85	24.51	46.66	125.62	159.96	129.52	14.17	46.24	70.37	73.52	46.17	51.2
Am_Tr_000082	1731	XP_045815662.1_sucrose transport protein SUC8-like [Trifolium pratense]	AT1G66570.2_sucrose-proton symporter 7, GeneName=SUC7	IPR036259_MFS transporter superfamily; IPR005989_Sucrose/H+ symporter, plant	0.386667	0.556667	0.536667	0.47	0	0.38	0.78	0	0.89	0.78	0	0.37	1.24	0	0	1.41
Am_Tr_000083	2470	XP_013451670.1_sucrose transport protein SUC8 [Medicago truncatula] KEH25698.1 sucrose proton symporter 2 [Medicago truncatula] RHN50887.1 putative sucrose/H+ symporter, plant, major facilitator superfamily domain-containing protein [Medicago truncatula]	AT2G14670.1_sucrose-proton symporter 8, GeneName=SUC8	IPR005989_Sucrose/H+ symporter, plant; IPR036259_MFS transporter superfamily	0.396667	0.746667	0.26	0.2	0.32	0.37	0.5	0.77	1.14	0.33	0	0	0.78	0	0.21	0.39
Am_Tr_000084	2853	XP_013451670.1_sucrose transport protein SUC8 [Medicago truncatula] KEH25698.1 sucrose proton symporter 2 [Medicago truncatula] RHN50887.1 putative sucrose/H+ symporter, plant, major facilitator superfamily domain-containing protein [Medicago truncatula]	AT2G14670.1_sucrose-proton symporter 8, GeneName=SUC8	IPR005989_Sucrose/H+ symporter, plant; IPR036259_MFS transporter superfamily	0	0.686667	0.21	0.313333	0	0	0	0.34	1.04	0.68	0	0.63	0	0.28	0.66	0
Am_Tr_000085	1323	XP_027354382.1_serine carboxypeptidase-like 40 isoform X3 [Abrus precatorius]	AT3G63470.1_serine carboxypeptidase-like 40, GeneName=scpl40	IPR001563_Peptidase S10, serine carboxypeptidase; IPR029058_Alpha/Beta hydrolase fold	0.49	14.39	61.1733	6.81	0.44	0.26	0.77	10.01	22.15	11.01	32.68	73.81	77.03	4.67	5.6	10.16
Am_Tr_000086	2123	KEH17669.1_serine carboxypeptidase-like protein [Medicago truncatula]	AT3G63470.1_serine carboxypeptidase-like 40, GeneName=scpl40	IPR001563_Peptidase S10, serine carboxypeptidase; IPR029058_Alpha/Beta hydrolase fold	0	0.183333	0.986667	0.253333	0	0	0	0.09	0.3	0.16	0.36	1.6	1	0	0.19	0.57
Am_Tr_000087	1044	PNY14128.1_serine carboxypeptidase 40-like protein [Trifolium pratense]	AT3G63470.1_serine carboxypeptidase-like 40, GeneName=scpl40	IPR001563_Peptidase S10, serine carboxypeptidase; IPR029058_Alpha/Beta hydrolase fold	0	3.52333	33.86	1.66	0	0	0	3.43	5.69	1.45	41.14	33.31	27.13	1.53	0.83	2.62
Am_Tr_000088	1177	PNY14128.1_serine carboxypeptidase 40-like protein [Trifolium pratense]	AT3G63470.1_serine carboxypeptidase-like 40, GeneName=scpl40	IPR029058_Alpha/Beta hydrolase fold; IPR001563_Peptidase S10, serine carboxypeptidase	0.29	3.53	15.9233	2.23333	0.14	0	0.73	2.27	4.69	3.63	20.77	12.74	14.26	2.3	1.55	2.85
Am_Tr_000089	1567	PNY14128.1_serine carboxypeptidase 40-like protein [Trifolium pratense]	AT3G63470.1_serine carboxypeptidase-like 40, GeneName=scpl40	.	0.06	0.113333	0.913333	0.226667	0.18	0	0	0	0.34	0	0.96	0.86	0.92	0.12	0.35	0.21
Am_Tr_000090	2012	TKY67751.1_Serine carboxypeptidase 35 [Spatholobus suberectus]	AT5G23210.3_serine carboxypeptidase-like 34, GeneName=SCPL34	IPR029058_Alpha/Beta hydrolase fold; IPR001563_Peptidase S10, serine carboxypeptidase	1.84	10.5733	1.52333	8.89667	2.48	0.96	2.08	11.88	10.8	9.04	2.02	2.29	0.26	11.45	9.39	5.85
Am_Tr_000091	1691	TKY67751.1_Serine carboxypeptidase 35 [Spatholobus suberectus]	AT5G08260.1_serine carboxypeptidase-like 35, GeneName=scpl35	IPR008543_Uncharacterised protein family Ycf2	0.333333	5.11333	0.586667	4.74	0.61	0	0.39	4.88	5.93	4.53	0.16	1.08	0.52	5.57	5.12	3.53
Am_Tr_000092	1842	TKY67751.1_Serine carboxypeptidase 35 [Spatholobus suberectus]	AT5G08260.1_serine carboxypeptidase-like 35, GeneName=scpl35	IPR001563_Peptidase S10, serine carboxypeptidase; IPR029058_Alpha/Beta hydrolase fold	17.35	39.5733	9.69667	38.2467	31.96	10.54	9.55	46.83	39.59	32.3	11.13	9.54	8.42	51.69	31.29	31.76
Am_Tr_000093	2064	TKY67751.1_Serine carboxypeptidase 35 [Spatholobus suberectus]	AT5G08260.1_serine carboxypeptidase-like 35, GeneName=scpl35	IPR001563_Peptidase S10, serine carboxypeptidase; IPR029058_Alpha/Beta hydrolase fold	0.686667	2.86333	0.166667	1.30667	0.8	0.56	0.7	2.67	3.99	1.93	0	0	0.5	1.21	2.37	0.34
Am_Tr_000094	1308	TKY67751.1_Serine carboxypeptidase 35 [Spatholobus suberectus]	AT5G08260.1_serine carboxypeptidase-like 35, GeneName=scpl35	IPR029058_Alpha/Beta hydrolase fold; IPR001563_Peptidase S10, serine carboxypeptidase	0.346667	1.07667	0.583333	0.283333	0	0.71	0.33	0	0.72	2.51	0.74	0.51	0.5	0.85	0	0
Am_Tr_000095	2733	TKY67751.1_Serine carboxypeptidase 35 [Spatholobus suberectus]	AT5G23210.3_serine carboxypeptidase-like 34, GeneName=SCPL34	IPR029058_Alpha/Beta hydrolase fold; IPR001563_Peptidase S10, serine carboxypeptidase	0	0.386667	0	0.67	0	0	0	0.42	0.24	0.5	0	0	0	0.55	1.24	0.22
Am_Tr_000096	1616	TKY67751.1_Serine carboxypeptidase 35 [Spatholobus suberectus]	AT5G08260.1_serine carboxypeptidase-like 35, GeneName=scpl35	IPR029058_Alpha/Beta hydrolase fold; IPR001563_Peptidase S10, serine carboxypeptidase	0.426667	0	0.136667	2.16667	0.99	0	0.29	0	0	0	0.41	0	0	5.34	0	1.16
Am_Tr_000097	684	YP_009760410.1_Ycf2 [Astragalus gummifer] QIQ57213.1 Ycf2 [Astragalus gummifer]	ATCG01280.1_Chloroplast Ycf2;ATPase, AAA type, core, GeneName=YCF2.2	IPR008543_Uncharacterised protein family Ycf2	0.106667	0.666667	0.376667	0	0	0	0.32	1.68	0	0.32	0	0.59	0.54	0	0	0
Am_Tr_000098	1884	TKY67751.1_Serine carboxypeptidase 35 [Spatholobus suberectus]	AT5G08260.1_serine carboxypeptidase-like 35, GeneName=scpl35	IPR029058_Alpha/Beta hydrolase fold; IPR001563_Peptidase S10, serine carboxypeptidase	27.7	70.9633	10.22	77.1133	50.89	18	14.21	81.89	65.16	65.84	9.66	10.55	10.45	126.23	61.97	43.14
Am_Tr_000099	953	TKY67751.1_Serine carboxypeptidase 35 [Spatholobus suberectus]	AT5G08260.1_serine carboxypeptidase-like 35, GeneName=scpl35	IPR008543_Uncharacterised protein family Ycf2	0.333333	3.61	0.543333	5.83333	1	0	0	2.69	5.39	2.75	1.17	0	0.46	8.75	6.26	2.49
Am_Tr_000100	402	TKY67751.1_Serine carboxypeptidase 35 [Spatholobus suberectus]	AT5G23210.5_serine carboxypeptidase-like 34, GeneName=SCPL34	.	0	3.71	0.806667	0.156667	0	0	0	4.07	2.23	4.83	0	1.77	0.65	0	0	0.47
Am_Tr_000101	2539	TKY54278.1_Serine carboxypeptidase 33 [Spatholobus suberectus]	AT3G17180.2_serine carboxypeptidase-like 33, GeneName=scpl33	IPR001563_Peptidase S10, serine carboxypeptidase; IPR029058_Alpha/Beta hydrolase fold	0.233333	1.40667	1.81333	0.626667	0.25	0.14	0.31	1.21	1.53	1.48	2.27	1.16	2.01	0.25	0.48	1.15
Am_Tr_000102	1667	TKY54278.1_Serine carboxypeptidase 33 [Spatholobus suberectus]	AT3G17180.1_serine carboxypeptidase-like 33, GeneName=scpl33	IPR029058_Alpha/Beta hydrolase fold; IPR001563_Peptidase S10, serine carboxypeptidase	0.28	0.91	2.7	1.19667	0.43	0	0.41	0.59	1.28	0.86	6.25	1.85	0	1.84	0	1.75
Am_Tr_000103	1833	XP_013458324.1_serine carboxypeptidase-like 33 isoform X1 [Medicago truncatula] KEH32355.1 serine carboxypeptidase-like protein [Medicago truncatula] RHN64411.1 putative carboxypeptidase D [Medicago truncatula]	AT3G17180.1_serine carboxypeptidase-like 33, GeneName=scpl33	IPR001563_Peptidase S10, serine carboxypeptidase; IPR029058_Alpha/Beta hydrolase fold	3.11333	29.0967	41.95	18.62	1.48	5.33	2.53	29.38	24.11	33.8	28.09	46.85	50.91	11.15	13.01	31.7
Am_Tr_000104	1404	XP_013458324.1_serine carboxypeptidase-like 33 isoform X1 [Medicago truncatula] KEH32355.1 serine carboxypeptidase-like protein [Medicago truncatula] RHN64411.1 putative carboxypeptidase D [Medicago truncatula]	AT3G17180.2_serine carboxypeptidase-like 33, GeneName=scpl33	IPR029058_Alpha/Beta hydrolase fold; IPR001563_Peptidase S10, serine carboxypeptidase	0	0	0	0.02	0	0	0	0	0	0	0	0	0	0.06	0	0
Am_Tr_000105	4164	TKY52163.1_WD repeat-containing protein 48 [Spatholobus suberectus]	AT3G05090.2_Transducin/WD40 repeat-like superfamily protein, GeneName=LRS1	IPR020472_G-protein beta WD-40 repeat; IPR001680_WD40 repeat; IPR036322_WD40-repeat-containing domain superfamily; IPR021772_WDR48/Bun107	0.656667	1.11	0.336667	0.34	0.72	0	1.25	0.7	1.46	1.17	0.22	0.48	0.31	0.24	0.78	0
Am_Tr_000106	2871	TKY52163.1_WD repeat-containing protein 48 [Spatholobus suberectus]	AT3G05090.2_Transducin/WD40 repeat-like superfamily protein, GeneName=LRS1	IPR036322_WD40-repeat-containing domain superfamily; IPR001680_WD40 repeat; IPR020472_G-protein beta WD-40 repeat	0.716667	0	0.0133333	0	0	1.19	0.96	0	0	0	0.04	0	0	0	0	0
Am_Tr_000107	3316	XP_004494665.1_WD repeat-containing protein 48 isoform X1 [Cicer arietinum]	AT3G05090.2_Transducin/WD40 repeat-like superfamily protein, GeneName=LRS1	IPR036322_WD40-repeat-containing domain superfamily; IPR021772_WDR48/Bun107; IPR001680_WD40 repeat	0.0833333	0.14	0.0466667	0.103333	0	0.07	0.18	0.11	0.1	0.21	0.04	0	0.1	0.24	0.01	0.06
Am_Tr_000108	1257	KYP74418.1_WD repeat-containing protein 48 [Cajanus cajan]	AT3G05090.2_Transducin/WD40 repeat-like superfamily protein, GeneName=LRS1	.	1.72667	1.95	3.27	1.09333	0.7	2	2.48	1.83	1.09	2.93	6.33	2.69	0.79	0.87	1.63	0.78
Am_Tr_000109	3147	XP_004494665.1_WD repeat-containing protein 48 isoform X1 [Cicer arietinum]	AT3G05090.2_Transducin/WD40 repeat-like superfamily protein, GeneName=LRS1	IPR036322_WD40-repeat-containing domain superfamily; IPR021772_WDR48/Bun107; IPR001680_WD40 repeat; IPR020472_G-protein beta WD-40 repeat	0.39	0.613333	0.0966667	0.463333	0	0.71	0.46	0.44	0.48	0.92	0.13	0	0.16	0.89	0.26	0.24
Am_Tr_000110	3329	XP_004494665.1_WD repeat-containing protein 48 isoform X1 [Cicer arietinum]	AT3G05090.2_Transducin/WD40 repeat-like superfamily protein, GeneName=LRS1	IPR020472_G-protein beta WD-40 repeat; IPR036322_WD40-repeat-containing domain superfamily; IPR001680_WD40 repeat	0.556667	0.326667	0.22	0.553333	0.6	0.46	0.61	0.57	0.1	0.31	0	0.18	0.48	0.5	0.43	0.73
Am_Tr_000111	3216	RYR02348.1_hypothetical protein Ahy_B06g081146 isoform D [Arachis hypogaea]	AT3G05090.2_Transducin/WD40 repeat-like superfamily protein, GeneName=LRS1	IPR021772_WDR48/Bun107; IPR036322_WD40-repeat-containing domain superfamily; IPR001680_WD40 repeat	1.26333	0.86	0.163333	0.573333	0	1.53	2.26	0	1.74	0.84	0.48	0.01	0	1.17	0.55	0
Am_Tr_000112	3385	RYR02348.1_hypothetical protein Ahy_B06g081146 isoform D [Arachis hypogaea]	AT3G05090.2_Transducin/WD40 repeat-like superfamily protein, GeneName=LRS1	IPR021772_WDR48/Bun107; IPR036322_WD40-repeat-containing domain superfamily; IPR001680_WD40 repeat	0.156667	0.496667	0.53	0.116667	0.47	0	0	1.49	0	0	0.07	1.11	0.41	0.35	0	0
Am_Tr_000113	3859	TKY52163.1_WD repeat-containing protein 48 [Spatholobus suberectus]	AT3G05090.2_Transducin/WD40 repeat-like superfamily protein, GeneName=LRS1	IPR001680_WD40 repeat; IPR036322_WD40-repeat-containing domain superfamily	3.89667	3.26	1.88667	2.23667	2.51	1.2	7.98	3.18	3.72	2.88	1.61	1.61	2.44	3.11	2.02	1.58
Am_Tr_000114	542	TKY61423.1_WD repeat-containing protein 48 [Spatholobus suberectus]	AT3G05090.2_Transducin/WD40 repeat-like superfamily protein, GeneName=LRS1	.	0.583333	1.44333	1.36	2	0	0.78	0.97	1.6	1.74	0.99	0.39	2.44	1.25	1.2	2.4	2.4
Am_Tr_000115	3498	TKY52163.1_WD repeat-containing protein 48 [Spatholobus suberectus]	AT3G05090.2_Transducin/WD40 repeat-like superfamily protein, GeneName=LRS1	IPR020472_G-protein beta WD-40 repeat; IPR036322_WD40-repeat-containing domain superfamily; IPR001680_WD40 repeat	0	0	0	0	0	0	0	0	0	0	0	0	0	0	0	0
Am_Tr_000116	3050	XP_004494665.1_WD repeat-containing protein 48 isoform X1 [Cicer arietinum]	AT3G05090.2_Transducin/WD40 repeat-like superfamily protein, GeneName=LRS1	IPR036322_WD40-repeat-containing domain superfamily; IPR021772_WDR48/Bun107; IPR001680_WD40 repeat; IPR020472_G-protein beta WD-40 repeat	19.1133	25.6967	15.24	20.3367	14.57	22.19	20.58	23.45	26.59	27.05	9.51	17.65	18.56	17.82	23.14	20.05
Am_Tr_000117	3219	XP_004494665.1_WD repeat-containing protein 48 isoform X1 [Cicer arietinum]	AT3G05090.2_Transducin/WD40 repeat-like superfamily protein, GeneName=LRS1	IPR036322_WD40-repeat-containing domain superfamily; IPR021772_WDR48/Bun107; IPR001680_WD40 repeat	4.58667	5.77	1.89667	4.18667	1.69	3.45	8.62	3.12	6.89	7.3	1	0.45	4.24	4.36	4.75	3.45
Am_Tr_000118	2724	TKY52163.1_WD repeat-containing protein 48 [Spatholobus suberectus]	AT3G05090.2_Transducin/WD40 repeat-like superfamily protein, GeneName=LRS1	IPR001680_WD40 repeat; IPR036322_WD40-repeat-containing domain superfamily	0.59	1.52333	0.886667	1.18	1.11	0.03	0.63	1.44	1.83	1.3	0.44	1.13	1.09	1.41	1.25	0.88
Am_Tr_000119	3342	XP_004494665.1_WD repeat-containing protein 48 isoform X1 [Cicer arietinum]	AT3G05090.2_Transducin/WD40 repeat-like superfamily protein, GeneName=LRS1	IPR036322_WD40-repeat-containing domain superfamily; IPR021772_WDR48/Bun107; IPR001680_WD40 repeat	2.12333	1.88667	1.11	1.08667	1.37	2.71	2.29	2.37	2.03	1.26	1.61	1.66	0.06	1.66	0	1.6
Am_Tr_000120	3498	XP_004494665.1_WD repeat-containing protein 48 isoform X1 [Cicer arietinum]	AT3G05090.2_Transducin/WD40 repeat-like superfamily protein, GeneName=LRS1	IPR036322_WD40-repeat-containing domain superfamily; IPR020472_G-protein beta WD-40 repeat; IPR001680_WD40 repeat	0.0933333	0.13	0.126667	0.0933333	0.09	0.08	0.11	0.11	0.09	0.19	0	0	0.38	0.07	0.11	0.1
Am_Tr_000121	1024	TKY61423.1_WD repeat-containing protein 48 [Spatholobus suberectus]	AT3G05090.2_Transducin/WD40 repeat-like superfamily protein, GeneName=LRS1	.	0	0	0.176667	0	0	0	0	0	0	0	0	0	0.53	0	0	0
Am_Tr_000122	3336	TKY52163.1_WD repeat-containing protein 48 [Spatholobus suberectus]	AT3G05090.2_Transducin/WD40 repeat-like superfamily protein, GeneName=LRS1	IPR036322_WD40-repeat-containing domain superfamily; IPR021772_WDR48/Bun107; IPR001680_WD40 repeat; IPR020472_G-protein beta WD-40 repeat	1.44	1.88667	1.34333	1.83	1.49	1.4	1.43	1.4	2.58	1.68	0.18	1.9	1.95	1.8	1.56	2.13
Am_Tr_000123	3802	TKY52163.1_WD repeat-containing protein 48 [Spatholobus suberectus]	AT3G05090.2_Transducin/WD40 repeat-like superfamily protein, GeneName=LRS1	IPR020472_G-protein beta WD-40 repeat; IPR001680_WD40 repeat; IPR036322_WD40-repeat-containing domain superfamily; IPR021772_WDR48/Bun107	5.96333	5.97333	4.44667	6.03	4.54	6.38	6.97	4.79	5.47	7.66	3.54	4.88	4.92	5.96	5.73	6.4
Am_Tr_000124	1290	AID51435.1_3-hydroxy-3-methylglutaryl coenzyme A synthase [Astragalus membranaceus]	AT4G11820.1_hydroxymethylglutaryl-CoA synthase / HMG-CoA synthase / 3-hydroxy-3-methylglutaryl coenzyme A synthase, GeneName=HMGS	.	3.01	9.66667	6.07	17.9	5.37	2.83	0.83	16.44	12.56	0	7.35	0.41	10.45	25.3	22.31	6.09
Am_Tr_000125	1968	AID51435.1_3-hydroxy-3-methylglutaryl coenzyme A synthase [Astragalus membranaceus]	AT4G11820.1_hydroxymethylglutaryl-CoA synthase / HMG-CoA synthase / 3-hydroxy-3-methylglutaryl coenzyme A synthase, GeneName=HMGS	.	0.943333	16.74	8.12667	20.7633	0.85	0	1.98	22.89	18.26	9.07	5.07	6.84	12.47	25.74	25.32	11.23
Am_Tr_000126	1090	AID51435.1_3-hydroxy-3-methylglutaryl coenzyme A synthase [Astragalus membranaceus]	AT4G11820.1_hydroxymethylglutaryl-CoA synthase / HMG-CoA synthase / 3-hydroxy-3-methylglutaryl coenzyme A synthase, GeneName=HMGS	IPR013746_Hydroxymethylglutaryl-coenzyme A synthase, C-terminal domain; IPR010122_Hydroxymethylglutaryl-CoA synthase, eukaryotic; IPR016039_Thiolase-like; IPR013528_Hydroxymethylglutaryl-coenzyme A synthase, N-terminal	18.5833	44.4067	37.4667	50.95	7.58	34.09	14.08	34.52	47.6	51.1	36.83	37.51	38.06	54.47	60.17	38.21
Am_Tr_000127	2917	XP_027358919.1_WD repeat and HMG-box DNA-binding protein 1 [Abrus precatorius]	AT3G42660.1_transducin family protein / WD-40 repeat family protein	.	0	0.0866667	0	0.166667	0	0	0	0.26	0	0	0	0	0	0.5	0	0
Am_Tr_000128	2435	AID51435.1_3-hydroxy-3-methylglutaryl coenzyme A synthase [Astragalus membranaceus]	AT4G11820.1_hydroxymethylglutaryl-CoA synthase / HMG-CoA synthase / 3-hydroxy-3-methylglutaryl coenzyme A synthase, GeneName=HMGS	.	0.946667	1.91333	0.35	0.993333	0.92	1.1	0.82	1.94	2.53	1.27	0.35	0.7	0	1.87	0.1	1.01
Am_Tr_000129	1821	AID51435.1_3-hydroxy-3-methylglutaryl coenzyme A synthase [Astragalus membranaceus]	AT4G11820.1_hydroxymethylglutaryl-CoA synthase / HMG-CoA synthase / 3-hydroxy-3-methylglutaryl coenzyme A synthase, GeneName=HMGS	.	0	0	0.363333	0	0	0	0	0	0	0	0	0.49	0.6	0	0	0
Am_Tr_000130	1834	AID51435.1_3-hydroxy-3-methylglutaryl coenzyme A synthase [Astragalus membranaceus]	AT4G11820.1_hydroxymethylglutaryl-CoA synthase / HMG-CoA synthase / 3-hydroxy-3-methylglutaryl coenzyme A synthase, GeneName=HMGS	.	45.7967	51.0733	31.82	29.92	71.23	41.74	24.42	53.26	46.88	53.08	39.11	36.88	19.47	28.55	25.27	35.94
Am_Tr_000131	1546	AID51435.1_3-hydroxy-3-methylglutaryl coenzyme A synthase [Astragalus membranaceus]	AT4G11820.1_hydroxymethylglutaryl-CoA synthase / HMG-CoA synthase / 3-hydroxy-3-methylglutaryl coenzyme A synthase, GeneName=HMGS	.	0	1.40667	0.34	0	0	0	0	1.44	0	2.78	1.02	0	0	0	0	0
Am_Tr_000132	1615	AID51435.1_3-hydroxy-3-methylglutaryl coenzyme A synthase [Astragalus membranaceus]	AT4G11820.1_hydroxymethylglutaryl-CoA synthase / HMG-CoA synthase / 3-hydroxy-3-methylglutaryl coenzyme A synthase, GeneName=HMGS	.	0	0.99	0.89	0	0	0	0	0	2.97	0	0	0	2.67	0	0	0
Am_Tr_000133	1994	AID51435.1_3-hydroxy-3-methylglutaryl coenzyme A synthase [Astragalus membranaceus]	AT4G11820.1_hydroxymethylglutaryl-CoA synthase / HMG-CoA synthase / 3-hydroxy-3-methylglutaryl coenzyme A synthase, GeneName=HMGS	.	0	0.213333	0.32	0.3	0	0	0	0	0	0.64	0	0.96	0	0.9	0	0
Am_Tr_000134	2707	XP_027358919.1_WD repeat and HMG-box DNA-binding protein 1 [Abrus precatorius]	AT3G42660.1_transducin family protein / WD-40 repeat family protein	.	0	0	0.88	0.103333	0	0	0	0	0	0	0.01	0	2.63	0	0	0.31
Am_Tr_000135	2177	AID51435.1_3-hydroxy-3-methylglutaryl coenzyme A synthase [Astragalus membranaceus]	AT4G11820.1_hydroxymethylglutaryl-CoA synthase / HMG-CoA synthase / 3-hydroxy-3-methylglutaryl coenzyme A synthase, GeneName=HMGS	.	13.31	24.0033	14.6	18.7967	11.55	21.7	6.68	22.87	33.99	15.15	14.1	18.28	11.42	12.53	27.32	16.54
Am_Tr_000136	2676	XP_027358919.1_WD repeat and HMG-box DNA-binding protein 1 [Abrus precatorius]	AT3G42660.1_transducin family protein / WD-40 repeat family protein	.	0.15	1.24	2.19667	2.26333	0.42	0	0.03	0.41	1.74	1.57	4.08	2.51	0	1.24	1.8	3.75
Am_Tr_000137	1355	AID51435.1_3-hydroxy-3-methylglutaryl coenzyme A synthase [Astragalus membranaceus]	AT4G11820.1_hydroxymethylglutaryl-CoA synthase / HMG-CoA synthase / 3-hydroxy-3-methylglutaryl coenzyme A synthase, GeneName=HMGS	.	1.95333	2.58	1.71	7.06667	0.02	5.84	0	3.86	3.88	0	0.32	2.48	2.33	9.73	7.05	4.42
Am_Tr_000138	2141	AID51435.1_3-hydroxy-3-methylglutaryl coenzyme A synthase [Astragalus membranaceus]	AT4G11820.1_hydroxymethylglutaryl-CoA synthase / HMG-CoA synthase / 3-hydroxy-3-methylglutaryl coenzyme A synthase, GeneName=HMGS	.	1.41333	0.426667	2.47667	1.72333	2.39	1.68	0.17	0.62	0.23	0.43	5.79	1.64	0	3.9	0.58	0.69
Am_Tr_000139	2836	XP_027358919.1_WD repeat and HMG-box DNA-binding protein 1 [Abrus precatorius]	AT3G42660.1_transducin family protein / WD-40 repeat family protein	.	0.0566667	0	0.153333	0	0	0	0.17	0	0	0	0.46	0	0	0	0	0
Am_Tr_000140	3001	XP_027358919.1_WD repeat and HMG-box DNA-binding protein 1 [Abrus precatorius]	AT3G42660.1_transducin family protein / WD-40 repeat family protein	.	0	0	0	0.176667	0	0	0	0	0	0	0	0	0	0	0	0.53
Am_Tr_000141	2471	AID51435.1_3-hydroxy-3-methylglutaryl coenzyme A synthase [Astragalus membranaceus]	AT4G11820.1_hydroxymethylglutaryl-CoA synthase / HMG-CoA synthase / 3-hydroxy-3-methylglutaryl coenzyme A synthase, GeneName=HMGS	.	3.00667	3.31667	0.566667	2.79333	5.12	2.88	1.02	5.88	2.63	1.44	0.21	1.49	0	3.07	2.92	2.39
Am_Tr_000142	1424	AID51435.1_3-hydroxy-3-methylglutaryl coenzyme A synthase [Astragalus membranaceus]	AT4G11820.1_hydroxymethylglutaryl-CoA synthase / HMG-CoA synthase / 3-hydroxy-3-methylglutaryl coenzyme A synthase, GeneName=HMGS	.	25.8633	17.2533	6.44667	5.85667	38.79	20.99	17.81	17.11	10.79	23.86	4.54	14.79	0.01	0.11	0	17.46
Am_Tr_000143	1221	AID51435.1_3-hydroxy-3-methylglutaryl coenzyme A synthase [Astragalus membranaceus]	AT4G11820.1_hydroxymethylglutaryl-CoA synthase / HMG-CoA synthase / 3-hydroxy-3-methylglutaryl coenzyme A synthase, GeneName=HMGS	.	4.82	4.10667	1.99	0	7.28	2.45	4.73	5.75	2.43	4.14	2.3	2.48	1.19	0	0	0
Am_Tr_000144	2930	XP_045805405.1_uncharacterized protein LOC123898481 [Trifolium pratense]	AT1G08760.1_GPI-anchored adhesin-like protein, putative (DUF936)	IPR010341_Protein of unknown function DUF936, plant	1.65667	6.21667	4.15667	3.32333	0.74	3.57	0.66	5	7.94	5.71	1.92	6.37	4.18	2.69	4.84	2.44
Am_Tr_000145	2696	TKY48314.1_muscle M-line assembly protein unc-89 [Spatholobus suberectus]	AT1G08760.1_GPI-anchored adhesin-like protein, putative (DUF936)	IPR010341_Protein of unknown function DUF936, plant	0.126667	0.626667	6.32667	1.94667	0.07	0.14	0.17	0.66	0.54	0.68	5.49	7	6.49	1.58	2.03	2.23
Am_Tr_000146	1264	.	.	.	1.65667	6.32	4.44	4.82333	1.94	1.66	1.37	5.22	7.22	6.52	3.89	3.67	5.76	4.15	5.58	4.74
Am_Tr_000147	314	.	.	.	0	1.70667	0	0.92	0	0	0	1.85	0	3.27	0	0	0	0	0	2.76
Am_Tr_000148	451	.	.	.	0	0	0.113333	0	0	0	0	0	0	0	0.34	0	0	0	0	0
Am_Tr_000149	1066	XP_014497047.2_histone H3.2 [Vigna radiata var. radiata]	AT1G09200.1_Histone superfamily protein	IPR009072_Histone-fold; IPR007125_Histone H2A/H2B/H3; IPR000164_Histone H3/CENP-A	8.86667	16.55	75.8733	20.8733	5.36	9.33	11.91	13.34	23.4	12.91	106	65.99	55.63	19.14	10.77	32.71
Am_Tr_000150	326	VAH18507.1_unnamed protein product [Triticum turgidum subsp. durum]	AT1G09200.1_Histone superfamily protein	IPR007125_Histone H2A/H2B/H3; IPR009072_Histone-fold; IPR000164_Histone H3/CENP-A	0.593333	15.0633	180.64	44.7667	0	1.78	0	6.66	36.32	2.21	247.63	149.45	144.84	21.71	27.46	85.13
Am_Tr_000151	1180	WP_152932083.1_histone H3, partial [Escherichia coli] MQL41295.1 hypothetical protein [Escherichia coli]	AT4G40030.2_Histone superfamily protein	IPR000164_Histone H3/CENP-A; IPR009072_Histone-fold; IPR007125_Histone H2A/H2B/H3	311.363	155.683	173.587	178.763	456.74	211.08	266.27	148.21	162.6	156.24	192.32	165.23	163.21	199.99	168.55	167.75
Am_Tr_000152	1397	KAG4944723.1_hypothetical protein JHK85_049369 [Glycine max] KAG5099016.1 hypothetical protein JHK82_048870 [Glycine max] KAG5103786.1 hypothetical protein JHK84_048755 [Glycine max]	AT4G40040.3_Histone superfamily protein	.	3.50667	1.22667	1.67	0.903333	3.22	4.05	3.25	1.34	1.11	1.23	1.44	2.29	1.28	1.19	0.65	0.87
Am_Tr_000153	1379	CAG1857241.1_unnamed protein product [Musa acuminata subsp. malaccensis]	AT4G40040.3_Histone superfamily protein	.	3.61	2.25333	2.03	1.29667	4.03	3.93	2.87	1.41	1.73	3.62	2.34	1.52	2.23	1.13	1.58	1.18
Am_Tr_000154	1484	KAG4944723.1_hypothetical protein JHK85_049369 [Glycine max] KAG5099016.1 hypothetical protein JHK82_048870 [Glycine max] KAG5103786.1 hypothetical protein JHK84_048755 [Glycine max]	AT4G40040.3_Histone superfamily protein	.	0	0.00333333	0	0	0	0	0	0	0.01	0	0	0	0	0	0	0
Am_Tr_000155	431	XP_003517274.1_dof zinc finger protein DOF5.7 [Glycine max] XP_028228272.1 dof zinc finger protein DOF5.7-like [Glycine soja] KAG4403049.1 hypothetical protein GLYMA_01G021100v4 [Glycine max] KAG5059176.1 hypothetical protein JHK87_000205 [Glycine soja] KAG5067823.1 hypothetical protein JHK85_000200 [Glycine max] KAG5087586.1 hypothetical protein JHK86_000198 [Glycine max] KAH1161238.1 hypothetic…	.	.	7.45	18.29	16.1933	18.06	7.36	9.03	5.96	16.82	24.27	13.78	32.89	7.34	8.35	19.68	15.87	18.63
Am_Tr_000156	382	XP_003517274.1_dof zinc finger protein DOF5.7 [Glycine max] XP_028228272.1 dof zinc finger protein DOF5.7-like [Glycine soja] KAG4403049.1 hypothetical protein GLYMA_01G021100v4 [Glycine max] KAG5059176.1 hypothetical protein JHK87_000205 [Glycine soja] KAG5067823.1 hypothetical protein JHK85_000200 [Glycine max] KAG5087586.1 hypothetical protein JHK86_000198 [Glycine max] KAH1161238.1 hypothetic…	.	.	11.2233	10.7767	9.52333	14.1733	24.01	6.9	2.76	13.38	5.53	13.42	18.45	7.02	3.1	15.35	12.81	14.36
Am_Tr_000157	544	XP_003517274.1_dof zinc finger protein DOF5.7 [Glycine max] XP_028228272.1 dof zinc finger protein DOF5.7-like [Glycine soja] KAG4403049.1 hypothetical protein GLYMA_01G021100v4 [Glycine max] KAG5059176.1 hypothetical protein JHK87_000205 [Glycine soja] KAG5067823.1 hypothetical protein JHK85_000200 [Glycine max] KAG5087586.1 hypothetical protein JHK86_000198 [Glycine max] KAH1161238.1 hypothetic…	.	.	2.88	0.46	1.59667	7.88667	2.38	2.91	3.35	0.37	0.37	0.64	1.09	2.1	1.6	7.09	8.3	8.27
Am_Tr_000158	503	KAH1230213.1_Exocyst complex component EXO70A1 [Glycine max]	AT5G03540.2_exocyst subunit exo70 family protein A1, GeneName=EXO70A1	.	0.896667	0.973333	0.86	0.72	2.18	0.51	0	1	1.04	0.88	0.51	1.57	0.5	0.82	0.44	0.9
Am_Tr_000159	335	KAH1230213.1_Exocyst complex component EXO70A1 [Glycine max]	AT5G03540.2_exocyst subunit exo70 family protein A1, GeneName=EXO70A1	.	0.633333	0.876667	0.466667	0.3	1.9	0	0	1.26	0	1.37	0	0	1.4	0.9	0	0
Am_Tr_000160	419	KAH1230213.1_Exocyst complex component EXO70A1 [Glycine max]	AT5G03540.2_exocyst subunit exo70 family protein A1, GeneName=EXO70A1	.	4.79333	3.95667	2.32667	0.95	6.07	3.09	5.22	2.71	6.05	3.11	3.1	0.99	2.89	0	2.11	0.74
Am_Tr_000161	350	KAH1230213.1_Exocyst complex component EXO70A1 [Glycine max]	AT5G03540.2_exocyst subunit exo70 family protein A1, GeneName=EXO70A1	.	0.53	0.48	0.683333	1.19333	0	0	1.59	0.58	0.86	0	2.05	0	0	0	2.4	1.18
Am_Tr_000162	405	KAH1230213.1_Exocyst complex component EXO70A1 [Glycine max]	AT5G03540.2_exocyst subunit exo70 family protein A1, GeneName=EXO70A1	.	0.29	2.47	0.766667	0	0	0.87	0	0.91	1.16	5.34	0	2.3	0	0	0	0
Am_Tr_000163	442	KAH1230213.1_Exocyst complex component EXO70A1 [Glycine max]	AT5G03540.2_exocyst subunit exo70 family protein A1, GeneName=EXO70A1	.	1.28	1.94	2.2	1.81667	0	3.84	0	1.48	3.7	0.64	0	3.19	3.41	3.31	0.61	1.53
Am_Tr_000164	408	KAH1230213.1_Exocyst complex component EXO70A1 [Glycine max]	AT5G03540.2_exocyst subunit exo70 family protein A1, GeneName=EXO70A1	.	8.83333	1.19333	0.796667	1.32333	21.71	0.85	3.94	1.01	0	2.57	2.39	0	0	0	0.76	3.21
Am_Tr_000165	2855	XP_004496114.1_exocyst complex component EXO70A1 [Cicer arietinum]	AT5G03540.1_exocyst subunit exo70 family protein A1, GeneName=EXO70A1	IPR004140_Exocyst complex component Exo70; IPR016159_Cullin repeat-like-containing domain superfamily	0	0.26	0.28	0.463333	0	0	0	0.22	0.39	0.17	0.52	0.18	0.14	1.07	0.22	0.1
Am_Tr_000166	2753	XP_004496114.1_exocyst complex component EXO70A1 [Cicer arietinum]	AT5G03540.1_exocyst subunit exo70 family protein A1, GeneName=EXO70A1	IPR004140_Exocyst complex component Exo70; IPR016159_Cullin repeat-like-containing domain superfamily	40.5133	4.31667	7.76333	6.3	39.46	38.99	43.09	4.91	4.66	3.38	6.45	9.59	7.25	10.91	4.93	3.06
Am_Tr_000167	2731	XP_004496114.1_exocyst complex component EXO70A1 [Cicer arietinum]	AT5G03540.1_exocyst subunit exo70 family protein A1, GeneName=EXO70A1	IPR004140_Exocyst complex component Exo70; IPR016159_Cullin repeat-like-containing domain superfamily	11.9167	1.16333	0.123333	1.30667	21.1	8.63	6.02	0	2.14	1.35	0	0.37	0	1.39	1.52	1.01
Am_Tr_000168	378	.	.	.	0.203333	0.636667	0.913333	1.56333	0	0.61	0	0.57	1.34	0	0	2.22	0.52	0.58	1.79	2.32
Am_Tr_000169	2829	XP_004496114.1_exocyst complex component EXO70A1 [Cicer arietinum]	AT5G03540.1_exocyst subunit exo70 family protein A1, GeneName=EXO70A1	IPR004140_Exocyst complex component Exo70; IPR016159_Cullin repeat-like-containing domain superfamily	4.93333	0.123333	0.0433333	0.29	5.93	3.87	5	0	0.27	0.1	0	0.13	0	0.52	0.21	0.14
Am_Tr_000170	2655	XP_004496114.1_exocyst complex component EXO70A1 [Cicer arietinum]	AT5G03540.1_exocyst subunit exo70 family protein A1, GeneName=EXO70A1	IPR004140_Exocyst complex component Exo70; IPR016159_Cullin repeat-like-containing domain superfamily	87.89	26.7933	26.61	33.9	123.79	75.03	64.85	23.95	27.98	28.45	16.23	33.47	30.13	28.81	34.39	38.5
Am_Tr_000171	2757	XP_004496114.1_exocyst complex component EXO70A1 [Cicer arietinum]	AT5G03540.1_exocyst subunit exo70 family protein A1, GeneName=EXO70A1	IPR004140_Exocyst complex component Exo70; IPR016159_Cullin repeat-like-containing domain superfamily	2.62333	1.35	1.01333	1.57667	0	4.48	3.39	1.73	1.12	1.2	1.08	0.4	1.56	2.65	0.93	1.15
Am_Tr_000172	256	.	.	.	0.68	1.63333	0.836667	0	0	2.04	0	0	0	4.9	0	2.51	0	0	0	0
Am_Tr_000173	237	.	.	.	0	3.17333	0.83	0.84	0	0	0	2.65	0	6.87	0	0	2.49	0	0	2.52
Am_Tr_000174	260	.	.	.	0	0	0	0	0	0	0	0	0	0	0	0	0	0	0	0
Am_Tr_000175	1484	MCH80727.1_hypothetical protein [Trifolium medium]	.	.	0.256667	0.246667	0.303333	1.10333	0.28	0	0.49	0	0.74	0	0	0.91	0	0.65	2.66	0
Am_Tr_000176	269	.	.	.	0	1.13333	0	0.42	0	0	0	1.54	1.86	0	0	0	0	0	0	1.26
Am_Tr_000177	1437	KAH1264081.1_hypothetical protein GmHk_01G000068 [Glycine max]	.	.	2.80333	4.10333	3.07	8.61667	1.96	4.85	1.6	3.33	4.92	4.06	2.3	3.58	3.33	9.35	9.03	7.47
Am_Tr_000178	799	KAH1264081.1_hypothetical protein GmHk_01G000068 [Glycine max]	.	.	1.12667	3.59333	1.98667	7.70667	1.44	0.49	1.45	3.55	4.67	2.56	1.1	2.02	2.84	4.93	11.68	6.51
Am_Tr_000179	257	.	.	.	0	0.586667	2.90333	2.38667	0	0	0	1.76	0	0	0	3.56	5.15	1.8	0	5.36
Am_Tr_000180	353	.	.	.	1.19	3.46	2.57333	4.36333	2.13	1.44	0	2.03	4.75	3.6	1.72	2.94	3.06	4.77	5.6	2.72
Am_Tr_000181	1939	.	.	.	1.61	7.36333	4.68	5.12667	2.13	1.4	1.3	7.44	7.11	7.54	0.51	6.82	6.71	5.23	4.83	5.32
Am_Tr_000182	260	.	.	.	0	0	3.61667	0	0	0	0	0	0	0	5.88	1.7	3.27	0	0	0
Am_Tr_000183	216	.	.	.	3.23	0	1.40333	0	0	9.69	0	0	0	0	0	4.21	0	0	0	0
Am_Tr_000184	983	.	.	.	4.29667	9.8	5.91333	8.31333	7.71	3.15	2.03	9.33	10.02	10.05	2.61	8.73	6.4	7.86	8.3	8.78
Am_Tr_000185	6047	XP_045789009.1_FAD synthetase 1, chloroplastic-like [Trifolium pratense] PNY04032.1 riboflavin biosynthesis protein ribF [Trifolium pratense]	AT1G01290.1_cofactor of nitrate reductase and xanthine dehydrogenase 3, GeneName=CNX3	IPR015864_FAD synthetase	1.19667	5.89667	5.11	5.68667	1.83	1.25	0.51	4.8	7.14	5.75	4.57	5.97	4.79	4.96	6.26	5.84
Am_Tr_000186	2344	XP_045789009.1_FAD synthetase 1, chloroplastic-like [Trifolium pratense] PNY04032.1 riboflavin biosynthesis protein ribF [Trifolium pratense]	AT5G08340.1_Nucleotidylyl transferase superfamily protein	IPR015864_FAD synthetase	0.92	1.73333	0.493333	0.68	0.49	1.03	1.24	1.73	2.01	1.46	0.52	0.24	0.72	1.05	0.56	0.43
Am_Tr_000187	4340	TKY50695.1_Transmembrane protein 53-B [Spatholobus suberectus]	AT3G19970.1_alpha/beta-Hydrolases superfamily protein	IPR029058_Alpha/Beta hydrolase fold; IPR008547_Protein of unknown function DUF829, TMEM53	0.386667	4.56	9.82667	2.31333	0.21	0.83	0.12	7.52	3.62	2.54	17.8	6.9	4.78	5.26	0.97	0.71
Am_Tr_000188	2887	XP_027329918.1_WD repeat-containing protein PCN-like isoform X1 [Abrus precatorius]	AT4G07410.1_Transducin family protein / WD-40 repeat family protein, GeneName=PCN	IPR036322_WD40-repeat-containing domain superfamily; IPR001680_WD40 repeat; IPR011047_Quinoprotein alcohol dehydrogenase-like superfamily	17.9833	14.01	12.2933	17.2267	20.9	19.45	13.6	12.27	16.51	13.25	8.91	14.87	13.1	12.55	15.46	23.67
Am_Tr_000189	1890	XP_003544489.1_WD repeat-containing protein PCN isoform X2 [Glycine max] XP_028200170.1 WD repeat-containing protein PCN-like isoform X2 [Glycine soja] KAG4382468.1 hypothetical protein GLYMA_14G089042v4 [Glycine max] KAH1079726.1 hypothetical protein GYH30_057288 [Glycine max] RZB68194.1 WD repeat-containing protein PCN [Glycine soja]	AT1G27470.1_transducin family protein / WD-40 repeat family protein	.	0.783333	0.593333	0.156667	0.97	0.34	0.74	1.27	0.4	0.78	0.6	0	0.25	0.22	1.08	1.11	0.72
Am_Tr_000190	1968	XP_025606834.1_WD repeat-containing protein PCN isoform X2 [Arachis hypogaea] RYR06118.1 hypothetical protein Ahy_B06g085911 [Arachis hypogaea]	AT4G07410.1_Transducin family protein / WD-40 repeat family protein, GeneName=PCN	IPR036322_WD40-repeat-containing domain superfamily; IPR001680_WD40 repeat; IPR020472_G-protein beta WD-40 repeat	0	0.136667	0.0533333	0.0666667	0	0	0	0	0.41	0	0	0.16	0	0	0.04	0.16
Am_Tr_000191	1938	XP_003544489.1_WD repeat-containing protein PCN isoform X2 [Glycine max] XP_028200170.1 WD repeat-containing protein PCN-like isoform X2 [Glycine soja] KAG4382468.1 hypothetical protein GLYMA_14G089042v4 [Glycine max] KAH1079726.1 hypothetical protein GYH30_057288 [Glycine max] RZB68194.1 WD repeat-containing protein PCN [Glycine soja]	AT1G27470.1_transducin family protein / WD-40 repeat family protein	.	1.29333	1.03333	0.0866667	1.28	0.86	1.54	1.48	1.23	0.6	1.27	0	0.26	0	1.57	0.96	1.31
Am_Tr_000192	1348	XP_003544489.1_WD repeat-containing protein PCN isoform X2 [Glycine max] XP_028200170.1 WD repeat-containing protein PCN-like isoform X2 [Glycine soja] KAG4382468.1 hypothetical protein GLYMA_14G089042v4 [Glycine max] KAH1079726.1 hypothetical protein GYH30_057288 [Glycine max] RZB68194.1 WD repeat-containing protein PCN [Glycine soja]	AT1G27470.1_transducin family protein / WD-40 repeat family protein	.	0.0366667	0.193333	0.346667	0.79	0	0.11	0	0.58	0	0	0.62	0	0.42	0.7	0.67	1
Am_Tr_000193	1396	XP_003544489.1_WD repeat-containing protein PCN isoform X2 [Glycine max] XP_028200170.1 WD repeat-containing protein PCN-like isoform X2 [Glycine soja] KAG4382468.1 hypothetical protein GLYMA_14G089042v4 [Glycine max] KAH1079726.1 hypothetical protein GYH30_057288 [Glycine max] RZB68194.1 WD repeat-containing protein PCN [Glycine soja]	AT1G27470.1_transducin family protein / WD-40 repeat family protein	.	0.993333	0	0.06	0.0866667	1.18	0.44	1.36	0	0	0	0.18	0	0	0	0.26	0
Am_Tr_000194	2016	XP_025606834.1_WD repeat-containing protein PCN isoform X2 [Arachis hypogaea] RYR06118.1 hypothetical protein Ahy_B06g085911 [Arachis hypogaea]	AT4G07410.1_Transducin family protein / WD-40 repeat family protein, GeneName=PCN	IPR036322_WD40-repeat-containing domain superfamily; IPR001680_WD40 repeat; IPR020472_G-protein beta WD-40 repeat	0	0.0233333	0.133333	0.1	0	0	0	0	0.07	0	0	0.4	0	0	0.02	0.28
Am_Tr_000195	292	ACU16857.1_unknown, partial [Glycine max]	.	.	0.813333	11.5033	7.37333	5.76	2.44	0	0	8.11	15.2	11.2	5.84	6.71	9.57	4.6	3.55	9.13
Am_Tr_000196	325	.	.	.	0	0.526667	20.7367	1.13	0	0	0	0.84	0	0.74	44.02	10.55	7.64	1.68	0.87	0.84
Am_Tr_000197	3738	.	.	.	0.923333	1.41	0.113333	1.11	0.09	2.68	0	2.05	1.76	0.42	0	0.19	0.15	0.46	2.87	0
Am_Tr_000198	2213	KAH1148347.1_hypothetical protein GYH30_043126 [Glycine max] RZB65735.1 MLO-like protein 10 [Glycine soja]	.	.	0.366667	1.58333	2.88333	1.58	0.4	0.34	0.36	1.22	1.89	1.64	4.01	2.89	1.75	0.6	2.78	1.36
Am_Tr_000199	1667	.	.	.	0.04	0.14	0.0833333	0.22	0.12	0	0	0.23	0.19	0	0	0.25	0	0	0.25	0.41
Am_Tr_000200	4305	MCI23361.1_hypothetical protein [Trifolium medium]	.	.	1.57333	1.75333	0.806667	1.94333	3.16	1.27	0.29	0.5	1.28	3.48	2.28	0	0.14	1.1	2.68	2.05
Am_Tr_000201	2973	KAH1148347.1_hypothetical protein GYH30_043126 [Glycine max] RZB65735.1 MLO-like protein 10 [Glycine soja]	.	.	2.84667	4.89667	3.06667	1.90667	1.84	3.47	3.23	5.93	5.55	3.21	0.21	4.58	4.41	2.33	1.26	2.13
Am_Tr_000202	2406	KAH1148347.1_hypothetical protein GYH30_043126 [Glycine max] RZB65735.1 MLO-like protein 10 [Glycine soja]	.	.	0	0	0	0.0233333	0	0	0	0	0	0	0	0	0	0	0.07	0
Am_Tr_000203	868	.	.	.	9.45333	3.47667	4.84333	3.69667	12.21	7.99	8.16	4.28	1.78	4.37	4.11	5.27	5.15	3.81	3.45	3.83
Am_Tr_000204	1400	.	.	.	0.913333	4.25667	2.56	3.83333	0.54	1.85	0.35	5.05	4.53	3.19	0.86	3.49	3.33	3.8	3.58	4.12
Am_Tr_000205	1501	.	.	.	3.48333	4.77333	2.92333	5.42667	6.5	2.52	1.43	3.01	7.02	4.29	0.94	4.07	3.76	4.88	6.64	4.76
Am_Tr_000206	3545	.	.	.	2.17667	4.63667	4.1	4.71333	3.04	2.07	1.42	4.98	4.94	3.99	0.56	5.63	6.11	5.88	3.28	4.98
Am_Tr_000207	2718	TKY55875.1_serine protease EDA2 [Spatholobus suberectus]	AT4G36195.3_Serine carboxypeptidase S28 family protein	IPR008758_Peptidase S28; IPR029058_Alpha/Beta hydrolase fold	18.1067	38.0433	40.1467	34.27	9.98	24.82	19.52	37.36	34.99	41.78	36.05	42.01	42.38	29.6	34.16	39.05
Am_Tr_000208	1018	TKY55875.1_serine protease EDA2 [Spatholobus suberectus]	AT4G36195.2_Serine carboxypeptidase S28 family protein	IPR008758_Peptidase S28; IPR029058_Alpha/Beta hydrolase fold	3.8	9.89333	10.3967	9.27667	1.43	6.95	3.02	7.69	10.35	11.64	3.82	13.18	14.19	6.26	10.62	10.95
Am_Tr_000209	255	.	.	.	0	0.773333	2.18333	0.62	0	0	0	0	2.32	0	4.77	0	1.78	1.86	0	0
Am_Tr_000210	499	.	.	.	2.98667	9.27333	5.45333	7.95	3.91	4.18	0.87	13.51	7.26	7.05	5.77	5.31	5.28	7.37	7.98	8.5
Am_Tr_000211	894	.	.	.	0	0	0.19	0.16	0	0	0	0	0	0	0.57	0	0	0	0	0.48
Am_Tr_000212	598	.	.	.	0.906667	1.41667	1.47	1.06	1.55	0.36	0.81	0	3.03	1.22	1.2	2.03	1.18	0.51	1.79	0.88
Am_Tr_000213	548	.	.	.	3.27667	6.31333	5.10333	7.72333	3.62	4.27	1.94	7.01	4.18	7.75	3.08	6.22	6.01	8.66	7.06	7.45
Am_Tr_000214	528	.	.	.	0.523333	3.41667	2.10667	2.74	0.81	0.76	0	3.29	3.84	3.12	0.82	4.06	1.44	3.45	3.81	0.96
Am_Tr_000215	844	.	.	.	0.843333	0.626667	0.86	0.976667	0.63	1.03	0.87	0	1.47	0.41	1.14	0	1.44	1.46	0.57	0.9
Am_Tr_000216	2128	GAU33346.1_hypothetical protein TSUD_166110 [Trifolium subterraneum]	AT5G63450.1_cytochrome P450, family 94, subfamily B, polypeptide 1, GeneName=CYP94B1	IPR001128_Cytochrome P450; IPR036396_Cytochrome P450 superfamily	3.18	4.05	15.1267	1.02333	3.34	1.64	4.56	4.18	4.33	3.64	6.78	19.16	19.44	1.55	0.92	0.6
Am_Tr_000217	318	MCI20769.1_TMV resistance protein N-like [Trifolium medium]	.	.	0	6.94	3.94333	2.97667	0	0	0	7.14	4.22	9.46	6.03	1.73	4.07	8.04	0	0.89
Am_Tr_000218	833	.	.	.	0.24	1.53	1.09667	0.623333	0.16	0.31	0.25	3.02	1.03	0.54	0.26	1.17	1.86	1.4	0.16	0.31
Am_Tr_000219	420	PNX76355.1_putative serine protease EDA2-like protein, partial [Trifolium pratense]	AT4G36190.1_Serine carboxypeptidase S28 family protein	IPR008758_Peptidase S28	9.97333	25.1267	34.23	26.8533	4.79	20.32	4.81	19.19	33.35	22.84	17.93	38.1	46.66	19.98	28.09	32.49
Am_Tr_000220	323	.	.	.	0.3	0.336667	6.31667	3.14667	0.9	0	0	0	1.01	0	10.11	4.95	3.89	8.56	0.88	0
Am_Tr_000221	2075	TKY68673.1_GTP cyclohydrolase 1 [Spatholobus suberectus]	AT3G07270.2_GTP cyclohydrolase I	IPR020602_GTP cyclohydrolase I domain	0	0	0.0333333	0.12	0	0	0	0	0	0	0	0.1	0	0	0.36	0
Am_Tr_000222	1918	XP_013444296.1_GTP cyclohydrolase 1 [Medicago truncatula] KEH18323.1 GTP cyclohydrolase I 1 [Medicago truncatula] RHN39253.1 putative GTP cyclohydrolase I [Medicago truncatula]	AT3G07270.2_GTP cyclohydrolase I	IPR020602_GTP cyclohydrolase I domain	0.313333	0.323333	0.433333	0.576667	0.11	0.74	0.09	0	0.92	0.05	0.23	0.69	0.38	0	0.88	0.85
Am_Tr_000223	2122	TKY66180.1_GTP cyclohydrolase 1 [Spatholobus suberectus]	AT3G07270.1_GTP cyclohydrolase I	IPR020602_GTP cyclohydrolase I domain	6.56667	11.5	14.26	10.4933	6.81	9.21	3.68	10.15	11.95	12.4	9.81	16.26	16.71	7.79	13.1	10.59
Am_Tr_000224	1874	XP_004510246.1_GTP cyclohydrolase 1-like [Cicer arietinum]	AT3G07270.2_GTP cyclohydrolase I	IPR020602_GTP cyclohydrolase I domain	0.543333	4.06667	8.46667	3.25333	0.12	0.58	0.93	2.91	3.98	5.31	7.67	10.37	7.36	2.72	3.49	3.55
Am_Tr_000225	2052	TKY66180.1_GTP cyclohydrolase 1 [Spatholobus suberectus]	AT3G07270.2_GTP cyclohydrolase I	IPR020602_GTP cyclohydrolase I domain	0.306667	2.01	2.39667	0.916667	0.57	0.35	0	1.35	2.02	2.66	2.58	1.89	2.72	0.84	1.03	0.88
Am_Tr_000226	561	XP_013462248.1_lysine histidine transporter-like 8 [Medicago truncatula] KEH36283.1 transmembrane amino acid transporter family protein [Medicago truncatula] RHN71204.1 putative amino acid transporter, transmembrane domain-containing protein [Medicago truncatula]	AT1G47670.1_Transmembrane amino acid transporter family protein	IPR013057_Amino acid transporter, transmembrane domain	5.45667	2.47667	0.97	2.42	10.92	4.32	1.13	3.07	2.79	1.57	0	1.08	1.83	1.85	3.85	1.56
Am_Tr_000227	2319	XP_004500895.1_lysine histidine transporter-like 8 [Cicer arietinum]	AT1G47670.1_Transmembrane amino acid transporter family protein	IPR013057_Amino acid transporter, transmembrane domain	0.92	6.21	3.29333	5.70333	0.19	2.57	0	1.6	9.54	7.49	3.5	4.16	2.22	6.92	9.48	0.71
Am_Tr_000228	576	XP_013462248.1_lysine histidine transporter-like 8 [Medicago truncatula] KEH36283.1 transmembrane amino acid transporter family protein [Medicago truncatula] RHN71204.1 putative amino acid transporter, transmembrane domain-containing protein [Medicago truncatula]	AT1G47670.1_Transmembrane amino acid transporter family protein	.	6.46667	0	0.0466667	1.07	2.97	16.43	0	0	0	0	0.14	0	0	2.06	0.87	0.28
Am_Tr_000229	2291	PNX73074.1_lysine/histidine transporter 8-like protein, partial [Trifolium pratense]	AT1G47670.1_Transmembrane amino acid transporter family protein	IPR013057_Amino acid transporter, transmembrane domain	4.87667	0.486667	0.363333	0.616667	5.85	7.63	1.15	0.22	0.75	0.49	0.62	0.47	0	0.42	0.53	0.9
Am_Tr_000230	2631	PNX73074.1_lysine/histidine transporter 8-like protein, partial [Trifolium pratense]	AT1G47670.1_Transmembrane amino acid transporter family protein	IPR013057_Amino acid transporter, transmembrane domain	2.07333	0.0433333	0.0833333	0.183333	1.14	4.74	0.34	0.13	0	0	0	0	0.25	0	0	0.55
Am_Tr_000231	1927	PNX73074.1_lysine/histidine transporter 8-like protein, partial [Trifolium pratense]	AT1G47670.1_Transmembrane amino acid transporter family protein	IPR013057_Amino acid transporter, transmembrane domain	0.106667	0.61	0.446667	0.536667	0	0.32	0	0.74	0.95	0.14	0.7	0.62	0.02	0.49	0.39	0.73
Am_Tr_000232	2214	KHN33817.1_Lysine histidine transporter-like 8 [Glycine soja]	AT1G47670.1_Transmembrane amino acid transporter family protein	IPR013057_Amino acid transporter, transmembrane domain	0.77	0	0.24	0.23	0.8	0.89	0.62	0	0	0	0.36	0.36	0	0.25	0.33	0.11
Am_Tr_000233	1378	XP_004500895.1_lysine histidine transporter-like 8 [Cicer arietinum]	AT1G47670.1_Transmembrane amino acid transporter family protein	IPR013057_Amino acid transporter, transmembrane domain	0.42	0.323333	0.32	1.70333	0	0.91	0.35	0.24	0.43	0.3	0.5	0	0.46	1.75	1.98	1.38
Am_Tr_000234	2638	PNX73074.1_lysine/histidine transporter 8-like protein, partial [Trifolium pratense]	AT1G47670.1_Transmembrane amino acid transporter family protein	IPR013057_Amino acid transporter, transmembrane domain	0	0	0	0	0	0	0	0	0	0	0	0	0	0	0	0
Am_Tr_000235	607	PNX73074.1_lysine/histidine transporter 8-like protein, partial [Trifolium pratense]	AT1G47670.1_Transmembrane amino acid transporter family protein	.	1.07667	0.326667	0.403333	2.71333	3.23	0	0	0.98	0	0	1.21	0	0	0.27	4.03	3.84
Am_Tr_000236	2552	PNX73074.1_lysine/histidine transporter 8-like protein, partial [Trifolium pratense]	AT1G47670.1_Transmembrane amino acid transporter family protein	IPR013057_Amino acid transporter, transmembrane domain	0.58	0.0633333	0	0.0733333	1.4	0	0.34	0	0.11	0.08	0	0	0	0.22	0	0
Am_Tr_000237	971	PNX73074.1_lysine/histidine transporter 8-like protein, partial [Trifolium pratense]	AT1G47670.1_Transmembrane amino acid transporter family protein	IPR013057_Amino acid transporter, transmembrane domain	0.266667	1.02333	0.673333	1.87	0	0.57	0.23	0.35	0.69	2.03	0.57	0.87	0.58	2.9	2.64	0.07
Am_Tr_000238	579	XP_013462248.1_lysine histidine transporter-like 8 [Medicago truncatula] KEH36283.1 transmembrane amino acid transporter family protein [Medicago truncatula] RHN71204.1 putative amino acid transporter, transmembrane domain-containing protein [Medicago truncatula]	AT1G47670.1_Transmembrane amino acid transporter family protein	.	13.4333	1.29667	1.37	1.73667	16.4	18.29	5.61	1.08	1.07	1.74	4.11	0	0	0.55	1.4	3.26
Am_Tr_000239	610	PNX73074.1_lysine/histidine transporter 8-like protein, partial [Trifolium pratense]	AT1G47670.1_Transmembrane amino acid transporter family protein	.	27.92	1.31	4.51333	2.09	9.65	58.87	15.24	0.47	0.34	3.12	4.42	4.92	4.2	3.97	1.1	1.2
Am_Tr_000240	2496	PNX73074.1_lysine/histidine transporter 8-like protein, partial [Trifolium pratense]	AT1G47670.1_Transmembrane amino acid transporter family protein	IPR013057_Amino acid transporter, transmembrane domain	0.296667	0.00666667	0.336667	0.09	0	0	0.89	0.02	0	0	0	0.04	0.97	0.27	0	0
Am_Tr_000241	2433	PNX73074.1_lysine/histidine transporter 8-like protein, partial [Trifolium pratense]	AT1G47670.1_Transmembrane amino acid transporter family protein	IPR013057_Amino acid transporter, transmembrane domain	0.376667	0	0.05	0.08	0	1.13	0	0	0	0	0.15	0	0	0	0.24	0
Am_Tr_000242	1680	AFK33811.1_unknown [Lotus japonicus]	AT2G44525.1_NADH dehydrogenase ubiquinone 1 alpha subcomplex assembly factor-like protein (DUF498/DUF598)	IPR036748_MTH938-like superfamily; IPR007523_NDUFAF3/Mth938 domain-containing protein	1.21333	1.06333	0.58	1.00333	1.21	2.12	0.31	0.67	1.76	0.76	0.65	0	1.09	0.82	0	2.19
Am_Tr_000243	1638	KAG7948666.1_hypothetical protein I3843_13G018700 [Carya illinoinensis] KAG7948667.1 hypothetical protein I3843_13G018700 [Carya illinoinensis]	AT2G44525.1_NADH dehydrogenase ubiquinone 1 alpha subcomplex assembly factor-like protein (DUF498/DUF598)	.	0.12	0.79	0.556667	0.833333	0.36	0	0	0.6	0	1.77	0.19	1.48	0	0.44	1.13	0.93
Am_Tr_000244	1412	RDY01151.1_NADH dehydrogenase [ubiquinone] 1 alpha subcomplex assembly factor 3 [Mucuna pruriens]	AT2G44525.1_NADH dehydrogenase ubiquinone 1 alpha subcomplex assembly factor-like protein (DUF498/DUF598)	IPR007523_NDUFAF3/Mth938 domain-containing protein; IPR036748_MTH938-like superfamily	15.6367	20.5067	25.24	23.6633	16.79	18.18	11.94	19.3	20.91	21.31	26.73	25.82	23.17	23.7	24	23.29
Am_Tr_000245	3363	AML77931.1_putative LOV domain-containing protein [Astragalus propinquus]	AT5G58140.4_phototropin 2, GeneName=PHOT2	IPR035965_PAS domain superfamily; IPR000014_PAS domain; IPR001610_PAC motif	4.93	8.21	4.51667	8.55667	4.94	5.45	4.4	6.99	8.37	9.27	2.2	5.76	5.59	8.63	5.67	11.37
Am_Tr_000246	3812	AML77931.1_putative LOV domain-containing protein [Astragalus propinquus]	AT5G58140.2_phototropin 2, GeneName=PHOT2	IPR000719_Protein kinase domain; IPR035965_PAS domain superfamily; IPR001610_PAC motif; IPR000014_PAS domain; IPR011009_Protein kinase-like domain superfamily	0.0333333	58.06	0.283333	4.91667	0.06	0	0.04	67.96	44.38	61.84	0	0.34	0.51	1.95	7.64	5.16
Am_Tr_000247	4293	AML77931.1_putative LOV domain-containing protein [Astragalus propinquus]	AT5G58140.2_phototropin 2, GeneName=PHOT2	IPR000719_Protein kinase domain; IPR000014_PAS domain; IPR011009_Protein kinase-like domain superfamily; IPR001610_PAC motif; IPR035965_PAS domain superfamily	0	4.24667	0.0566667	0.116667	0	0	0	5.67	3.21	3.86	0	0.02	0.15	0.28	0.07	0
Am_Tr_000248	1370	RDY01151.1_NADH dehydrogenase [ubiquinone] 1 alpha subcomplex assembly factor 3 [Mucuna pruriens]	AT2G44525.1_NADH dehydrogenase ubiquinone 1 alpha subcomplex assembly factor-like protein (DUF498/DUF598)	IPR036748_MTH938-like superfamily	0.316667	0.193333	0.593333	0.213333	0	0.56	0.39	0	0.58	0	0	0	1.78	0.09	0	0.55
Am_Tr_000249	2044	XP_039684800.1_ornithine aminotransferase, mitochondrial [Medicago truncatula] RHN42408.1 putative ornithine aminotransferase [Medicago truncatula]	AT5G46180.1_ornithine-delta-aminotransferase, GeneName=DELTA-OAT	IPR005814_Aminotransferase class-III; IPR015424_Pyridoxal phosphate-dependent transferase	0.746667	0.21	0.366667	0.24	0.35	1.27	0.62	0.28	0.19	0.16	0.27	0.47	0.36	0.23	0.1	0.39
Am_Tr_000250	2676	XP_039684800.1_ornithine aminotransferase, mitochondrial [Medicago truncatula] RHN42408.1 putative ornithine aminotransferase [Medicago truncatula]	AT5G46180.1_ornithine-delta-aminotransferase, GeneName=DELTA-OAT	IPR005814_Aminotransferase class-III; IPR015424_Pyridoxal phosphate-dependent transferase	2.28667	1.27667	0.87	1.04667	1.6	1.22	4.04	1.85	0.58	1.4	1.27	0.4	0.94	1.17	1.44	0.53
Am_Tr_000251	434	.	.	.	1.58333	2.78667	2.45667	4.98333	4.38	0	0.37	4.74	0	3.62	3.81	0	3.56	5.84	0	9.11
Am_Tr_000252	3423	AML77931.1_putative LOV domain-containing protein [Astragalus propinquus]	AT5G58140.2_phototropin 2, GeneName=PHOT2	IPR000719_Protein kinase domain; IPR011009_Protein kinase-like domain superfamily; IPR035965_PAS domain superfamily; IPR001610_PAC motif; IPR000014_PAS domain	0	0.653333	0.13	0.346667	0	0	0	0.26	0.81	0.89	0.08	0.13	0.18	0.25	0.12	0.67
Am_Tr_000253	3155	AML77931.1_putative LOV domain-containing protein [Astragalus propinquus]	AT5G58140.2_phototropin 2, GeneName=PHOT2	IPR000719_Protein kinase domain; IPR011009_Protein kinase-like domain superfamily; IPR035965_PAS domain superfamily; IPR001610_PAC motif; IPR000014_PAS domain	0	2.78333	0.546667	0.413333	0	0	0	0.81	5.06	2.48	0.33	0.8	0.51	0.42	0.73	0.09
Am_Tr_000254	2953	AML77931.1_putative LOV domain-containing protein [Astragalus propinquus]	AT5G58140.2_phototropin 2, GeneName=PHOT2	IPR000719_Protein kinase domain; IPR011009_Protein kinase-like domain superfamily; IPR001610_PAC motif; IPR000014_PAS domain; IPR035965_PAS domain superfamily	5.67	14.3867	6.89667	10.9533	6.73	5.68	4.6	14.54	11.83	16.79	4.64	8.35	7.7	11.92	8.73	12.21
Am_Tr_000255	4091	AML77931.1_putative LOV domain-containing protein [Astragalus propinquus]	AT5G58140.2_phototropin 2, GeneName=PHOT2	IPR035965_PAS domain superfamily; IPR000719_Protein kinase domain; IPR000014_PAS domain; IPR001610_PAC motif; IPR011009_Protein kinase-like domain superfamily	0	43.21	0.593333	1.02	0	0	0	46.51	41.27	41.85	0.14	0.71	0.93	1.65	1.41	0
Am_Tr_000256	3221	AML77931.1_putative LOV domain-containing protein [Astragalus propinquus]	AT5G58140.2_phototropin 2, GeneName=PHOT2	IPR000719_Protein kinase domain; IPR011009_Protein kinase-like domain superfamily; IPR001610_PAC motif; IPR000014_PAS domain; IPR035965_PAS domain superfamily	1.39667	4.60333	2.51333	4.79667	1	2.4	0.79	4.13	4.75	4.93	1.26	2.68	3.6	6.13	3.93	4.33
Am_Tr_000257	1277	RDY01151.1_NADH dehydrogenase [ubiquinone] 1 alpha subcomplex assembly factor 3 [Mucuna pruriens]	AT3G60150.2_NADH dehydrogenase ubiquinone 1 alpha subcomplex assembly factor-like protein (DUF498/DUF598)	.	2.69333	0.06	0	0.186667	3.21	2	2.87	0	0	0.18	0	0	0	0.26	0	0.3
Am_Tr_000258	2570	GAU42281.1_hypothetical protein TSUD_81900 [Trifolium subterraneum]	AT5G46180.1_ornithine-delta-aminotransferase, GeneName=DELTA-OAT	IPR010164_Ornithine aminotransferase; IPR005814_Aminotransferase class-III; IPR015424_Pyridoxal phosphate-dependent transferase	222.81	77.9667	97.9133	98.0067	191.62	198.69	278.12	90.77	64.04	79.09	65.99	113.03	114.72	69.77	108.34	115.91
Am_Tr_000259	598	.	.	.	0	0	1.22	0	0	0	0	0	0	0	1.01	2.65	0	0	0	0
Am_Tr_000260	717	.	.	.	1.78	2.04667	1.47333	2.72667	2.79	1.95	0.6	3.71	0.78	1.65	1.19	2.79	0.44	3.62	1.69	2.87
Am_Tr_000261	1244	.	.	.	0	0.19	0.4	0	0	0	0	0	0.39	0.18	0.34	0.21	0.65	0	0	0
Am_Tr_000262	530	.	.	.	0.56	0	0	0.17	1.68	0	0	0	0	0	0	0	0	0.51	0	0
Am_Tr_000263	546	.	.	.	0.21	0.286667	0	0.64	0	0	0.63	0	0	0.86	0	0	0	0.95	0.97	0
Am_Tr_000264	1337	.	.	.	0.573333	0.63	0.5	0.466667	0.28	0.58	0.86	0	1.34	0.55	0.2	0.79	0.51	0.33	1.07	0
Am_Tr_000265	609	.	.	.	0	0.173333	0.36	0.163333	0	0	0	0	0	0.52	0	0	1.08	0	0	0.49
Am_Tr_000266	586	.	.	.	2.00333	0.43	0.0133333	1.46	1.52	1.23	3.26	1.29	0	0	0	0	0.04	0.88	2.9	0.6
Am_Tr_000267	582	.	.	.	0	0	0.746667	0	0	0	0	0	0	0	2.24	0	0	0	0	0
Am_Tr_000268	1163	.	.	.	1.37667	1.09333	1.75333	1.25333	1.73	1.18	1.22	1.07	0.91	1.3	2.63	1.27	1.36	0.88	1.69	1.19
Am_Tr_000269	477	.	.	.	0	0	0	0.486667	0	0	0	0	0	0	0	0	0	0.36	0.37	0.73
Am_Tr_000270	1684	ARW70868.1_abscisic acid 8&apos;-hydroxylase OH2 [Pisum sativum]	AT5G45340.2_cytochrome P450, family 707, subfamily A, polypeptide 3, GeneName=CYP707A3	IPR001128_Cytochrome P450; IPR002401_Cytochrome P450, E-class, group I; IPR036396_Cytochrome P450 superfamily	5.13	6.20333	0.17	7.06	3.22	5.36	6.81	10.8	2.31	5.5	0	0.51	0	19.23	0.2	1.75
Am_Tr_000271	2395	XP_027360058.1_abscisic acid 8&apos;-hydroxylase CYP707A2-like isoform X2 [Abrus precatorius]	AT5G45340.1_cytochrome P450, family 707, subfamily A, polypeptide 3, GeneName=CYP707A3	IPR001128_Cytochrome P450; IPR002397_Cytochrome P450, B-class; IPR036396_Cytochrome P450 superfamily	1.66667	0.16	0.363333	2.17	1.24	1.23	2.53	0.48	0	0	0	0.23	0.86	5.74	0.53	0.24
Am_Tr_000272	2866	XP_027360057.1_abscisic acid 8&apos;-hydroxylase CYP707A2-like isoform X1 [Abrus precatorius]	AT4G19230.1_cytochrome P450, family 707, subfamily A, polypeptide 1, GeneName=CYP707A1	IPR001128_Cytochrome P450; IPR036396_Cytochrome P450 superfamily	2.49667	1.33667	0.406667	3.94667	3.38	0.43	3.68	2.97	0.59	0.45	0.16	0.66	0.4	10.74	0.29	0.81
Am_Tr_000273	1892	XP_004509492.1_abscisic acid 8&apos;-hydroxylase CYP707A2-like [Cicer arietinum]	AT4G19230.1_cytochrome P450, family 707, subfamily A, polypeptide 1, GeneName=CYP707A1	IPR001128_Cytochrome P450; IPR036396_Cytochrome P450 superfamily	1.06	2.87667	0.163333	3.53667	1.02	0	2.16	5.05	1.29	2.29	0.19	0	0.3	8.51	1.48	0.62
Am_Tr_000274	1627	XP_004509492.1_abscisic acid 8&apos;-hydroxylase CYP707A2-like [Cicer arietinum]	AT4G19230.1_cytochrome P450, family 707, subfamily A, polypeptide 1, GeneName=CYP707A1	IPR036396_Cytochrome P450 superfamily; IPR001128_Cytochrome P450; IPR002403_Cytochrome P450, E-class, group IV	10.88	11.9133	0.28	12.9933	3.26	9.75	19.63	25.98	1.11	8.65	0	0.3	0.54	29.43	5.6	3.95
Am_Tr_000275	2195	XP_027360058.1_abscisic acid 8&apos;-hydroxylase CYP707A2-like isoform X2 [Abrus precatorius]	AT4G19230.1_cytochrome P450, family 707, subfamily A, polypeptide 1, GeneName=CYP707A1	IPR002401_Cytochrome P450, E-class, group I; IPR001128_Cytochrome P450; IPR036396_Cytochrome P450 superfamily	53.5333	31.2967	9.95667	63.5733	12.49	48.16	99.95	70.99	7.54	15.36	6.42	10.95	12.5	151.39	7.88	31.45
Am_Tr_000276	1828	XP_004509492.1_abscisic acid 8&apos;-hydroxylase CYP707A2-like [Cicer arietinum]	AT5G45340.2_cytochrome P450, family 707, subfamily A, polypeptide 3, GeneName=CYP707A3	IPR001128_Cytochrome P450; IPR002401_Cytochrome P450, E-class, group I; IPR036396_Cytochrome P450 superfamily	2.92333	0.786667	0.0566667	2.56	1.49	0	7.28	0.93	1.43	0	0	0	0.17	4.99	1.47	1.22
Am_Tr_000277	1324	MCI28189.1_hypothetical protein [Trifolium medium]	AT4G19230.1_cytochrome P450, family 707, subfamily A, polypeptide 1, GeneName=CYP707A1	IPR001128_Cytochrome P450; IPR036396_Cytochrome P450 superfamily; IPR002397_Cytochrome P450, B-class	0.386667	0.0633333	0.123333	0.573333	0.15	0.29	0.72	0	0.19	0	0	0.14	0.23	0.9	0.39	0.43
Am_Tr_000278	2478	XP_027360057.1_abscisic acid 8&apos;-hydroxylase CYP707A2-like isoform X1 [Abrus precatorius]	AT4G19230.1_cytochrome P450, family 707, subfamily A, polypeptide 1, GeneName=CYP707A1	IPR001128_Cytochrome P450; IPR036396_Cytochrome P450 superfamily	0.56	0.44	0.24	0.85	0	0.26	1.42	1.12	0	0.2	0	0	0.72	2.15	0	0.4
Am_Tr_000279	251	.	.	.	0	0	0.633333	0.653333	0	0	0	0	0	0	0	0	1.9	0	0	1.96
Am_Tr_000280	3798	XP_004489931.1_uncharacterized protein LOC101505283 isoform X2 [Cicer arietinum]	AT3G52250.1_Duplicated homeodomain-like superfamily protein	IPR009057_Homeobox-like domain superfamily; IPR001005_SANT/Myb domain; IPR017930_Myb domain	0.03	0.0466667	0.226667	0.106667	0.03	0.06	0	0	0.05	0.09	0.19	0	0.49	0.14	0.18	0
Am_Tr_000281	2966	XP_004489931.1_uncharacterized protein LOC101505283 isoform X2 [Cicer arietinum]	AT3G52250.1_Duplicated homeodomain-like superfamily protein	.	2.92667	1.29667	1.05333	1.42333	3.08	2.54	3.16	1.92	0.97	1	0.72	1.19	1.25	1.55	1.11	1.61
Am_Tr_000282	3879	XP_004489931.1_uncharacterized protein LOC101505283 isoform X2 [Cicer arietinum]	AT3G52250.1_Duplicated homeodomain-like superfamily protein	IPR009057_Homeobox-like domain superfamily; IPR001005_SANT/Myb domain; IPR017930_Myb domain	0.363333	0.486667	0.463333	0.666667	0.33	0.41	0.35	0.35	0.85	0.26	0.24	0.79	0.36	1.03	0.13	0.84
Am_Tr_000283	6735	XP_004496318.1_uncharacterized protein LOC101504689 isoform X1 [Cicer arietinum]	AT3G52250.1_Duplicated homeodomain-like superfamily protein	IPR001005_SANT/Myb domain; IPR017930_Myb domain; IPR009057_Homeobox-like domain superfamily	3.38	0.216667	0.263333	0.0766667	1.2	0.19	8.75	0	0	0.65	0	0.23	0.56	0	0	0.23
Am_Tr_000284	2104	MCH86163.1_nuclear receptor corepressor [Trifolium medium]	AT3G52250.1_Duplicated homeodomain-like superfamily protein	.	0.0933333	0.196667	0.43	0	0	0	0.28	0.16	0.19	0.24	0	0.37	0.92	0	0	0
Am_Tr_000285	5392	XP_004489931.1_uncharacterized protein LOC101505283 isoform X2 [Cicer arietinum]	AT3G52250.1_Duplicated homeodomain-like superfamily protein	IPR001005_SANT/Myb domain; IPR017930_Myb domain; IPR009057_Homeobox-like domain superfamily	36.6733	12.9633	8.76333	12.85	63.64	20.73	25.65	12.82	14.64	11.43	8.91	8.57	8.81	12.77	13.11	12.67
Am_Tr_000286	5236	XP_004489931.1_uncharacterized protein LOC101505283 isoform X2 [Cicer arietinum]	AT3G52250.1_Duplicated homeodomain-like superfamily protein	IPR001005_SANT/Myb domain; IPR009057_Homeobox-like domain superfamily; IPR017930_Myb domain	0.826667	0.996667	0.65	0.886667	0.87	0.44	1.17	0.71	1.02	1.26	0.1	0.75	1.1	0.69	1.22	0.75
Am_Tr_000287	5311	XP_004489931.1_uncharacterized protein LOC101505283 isoform X2 [Cicer arietinum]	AT3G52250.1_Duplicated homeodomain-like superfamily protein	IPR017930_Myb domain; IPR009057_Homeobox-like domain superfamily; IPR001005_SANT/Myb domain	14.6167	8.13333	9.05333	8.09667	17.74	12.48	13.63	9.22	9.25	5.93	8.08	12.04	7.04	5.1	11.23	7.96
Am_Tr_000288	5317	XP_004489931.1_uncharacterized protein LOC101505283 isoform X2 [Cicer arietinum]	AT3G52250.1_Duplicated homeodomain-like superfamily protein	IPR017930_Myb domain; IPR009057_Homeobox-like domain superfamily; IPR001005_SANT/Myb domain	2.22667	1.77667	0.683333	1.55	3.58	0.79	2.31	1.03	1.84	2.46	0.13	0.51	1.41	1.88	1.45	1.32
Am_Tr_000289	6521	XP_004496318.1_uncharacterized protein LOC101504689 isoform X1 [Cicer arietinum]	AT3G52250.1_Duplicated homeodomain-like superfamily protein	IPR017930_Myb domain; IPR009057_Homeobox-like domain superfamily; IPR001005_SANT/Myb domain	34.26	24.6133	15.04	19.5033	43.74	20.89	38.15	24.32	26.42	23.1	8.87	19.63	16.62	14.27	23.5	20.74
Am_Tr_000290	2751	XP_004510773.1_ATP-dependent helicase BRM isoform X2 [Cicer arietinum]	AT2G46020.3_transcription regulatory protein SNF2, GeneName=BRM	IPR027417_P-loop containing nucleoside triphosphate hydrolase; IPR000330_SNF2, N-terminal; IPR014978_Glutamine-Leucine-Glutamine, QLQ	2.77667	3.5	1.39333	4.82	2.06	3.29	2.98	3.81	3.07	3.62	0.31	2.06	1.81	3.83	4.83	5.8
Am_Tr_000291	3890	RDX66539.1_ATP-dependent helicase BRM, partial [Mucuna pruriens]	AT2G46020.1_transcription regulatory protein SNF2, GeneName=BRM	IPR014978_Glutamine-Leucine-Glutamine, QLQ	2.77333	4.72333	1.52	3.84	3.18	3.66	1.48	4.45	5.08	4.64	0.57	1.76	2.23	2.72	3.91	4.89
Am_Tr_000292	3847	XP_004492763.1_ATP-dependent helicase BRM-like [Cicer arietinum]	AT2G46020.1_transcription regulatory protein SNF2, GeneName=BRM	IPR014978_Glutamine-Leucine-Glutamine, QLQ	0.43	0.156667	0.666667	0.69	0.43	0.86	0	0	0	0.47	0	1.1	0.9	0.34	0.6	1.13
Am_Tr_000293	3744	XP_004492763.1_ATP-dependent helicase BRM-like [Cicer arietinum]	AT2G46020.1_transcription regulatory protein SNF2, GeneName=BRM	IPR014978_Glutamine-Leucine-Glutamine, QLQ	12.0967	20.8367	11.6533	17.3733	11.07	16.26	8.96	19.82	23.84	18.85	3.06	15.68	16.22	9.17	19.05	23.9
Am_Tr_000294	267	XP_045816126.1_alcohol dehydrogenase 1 isoform X1 [Trifolium pratense]	AT5G43940.1_GroES-like zinc-binding dehydrogenase family protein, GeneName=HOT5	.	0.573333	0.993333	0.49	2.61	0	1.72	0	1.59	0	1.39	0	0	1.47	4.68	1.61	1.54
Am_Tr_000295	3856	TKY68593.1_PAT1-like 1 [Spatholobus suberectus]	AT1G79090.2_topoisomerase II-associated protein	.	7.39667	13.7733	10.7667	13.5467	6.45	9.7	6.04	13.34	15.09	12.89	6.1	13.97	12.23	11.61	15.73	13.3
Am_Tr_000296	3882	TKY68593.1_PAT1-like 1 [Spatholobus suberectus]	AT1G79090.2_topoisomerase II-associated protein	.	0.07	0.193333	0.263333	0.0666667	0	0.21	0	0	0.58	0	0	0.37	0.42	0	0.2	0
Am_Tr_000297	3974	TKY68593.1_PAT1-like 1 [Spatholobus suberectus]	AT1G79090.2_topoisomerase II-associated protein	.	0.3	1.07333	1.07667	0.676667	0.39	0.51	0	0.3	1.39	1.53	1.63	0.85	0.75	0.82	0.61	0.6
Am_Tr_000298	2401	MCH86792.1_hypothetical protein [Trifolium medium]	AT1G79090.2_topoisomerase II-associated protein	.	8.21	10.6667	9.73667	11.4567	9.47	9.87	5.29	9.78	11.44	10.78	8.02	11.96	9.23	9.39	13.46	11.52
Am_Tr_000299	3870	XP_004488835.1_protein PAT1 homolog [Cicer arietinum]	AT1G79090.2_topoisomerase II-associated protein	.	18.9767	22.4667	16.2233	22.5867	14.26	23.15	19.52	20.61	26.51	20.28	9.23	20.88	18.56	17.76	28.16	21.84
Am_Tr_000300	748	PNX92552.1_hypothetical protein L195_g015691 [Trifolium pratense]	AT1G79090.2_topoisomerase II-associated protein	.	1.32	2.44	1.55	1.55333	0.33	2.96	0.67	0.83	5.17	1.32	0.37	2.27	2.01	0	2.26	2.4
Am_Tr_000301	456	.	.	.	0	0.15	0	0	0	0	0	0	0.45	0	0	0	0	0	0	0
Am_Tr_000302	1069	XP_004513449.1_uncharacterized protein LOC101511845 [Cicer arietinum]	AT4G29790.1_serine/arginine repetitive matrix protein	.	0.143333	0.466667	0.563333	0.616667	0.11	0.23	0.09	0.66	0.25	0.49	0	0.55	1.14	1.02	0.36	0.47
Am_Tr_000303	4973	RDX69337.1_hypothetical protein CR513_51561, partial [Mucuna pruriens]	AT4G29790.1_serine/arginine repetitive matrix protein	.	14.4533	9.51667	7.06667	9.00333	13.75	17.54	12.07	10.27	8.73	9.55	2.27	9.43	9.5	7.73	8.97	10.31
Am_Tr_000304	10107	KAH1201156.1_hypothetical protein GmHk_17G047931 [Glycine max]	AT4G29790.1_serine/arginine repetitive matrix protein	.	0.583333	0.33	0.29	0.236667	0.2	0.85	0.7	0.4	0.25	0.34	0	0.74	0.13	0.71	0	0
Am_Tr_000305	4021	RDX69337.1_hypothetical protein CR513_51561, partial [Mucuna pruriens]	AT4G29790.1_serine/arginine repetitive matrix protein	.	0.863333	0.883333	1.74333	0.23	1.61	0.27	0.71	1.37	1.28	0	3.74	1.2	0.29	0	0.19	0.5
Am_Tr_000306	9879	KAH1201156.1_hypothetical protein GmHk_17G047931 [Glycine max]	AT4G29790.1_serine/arginine repetitive matrix protein	.	3.77333	2.96667	1.92667	3.15667	2.97	6.1	2.25	2.83	3.32	2.75	0.75	2.37	2.66	1.39	3.84	4.24
Am_Tr_000307	10704	KAH1201156.1_hypothetical protein GmHk_17G047931 [Glycine max]	AT4G29790.1_serine/arginine repetitive matrix protein	.	0.363333	0.0533333	0.0566667	0.0566667	0	0.95	0.14	0.07	0	0.09	0.17	0	0	0.09	0	0.08
Am_Tr_000308	5339	RDX69337.1_hypothetical protein CR513_51561, partial [Mucuna pruriens]	AT4G29790.1_serine/arginine repetitive matrix protein	.	0	0	0	0	0	0	0	0	0	0	0	0	0	0	0	0
Am_Tr_000309	10138	KAH1201156.1_hypothetical protein GmHk_17G047931 [Glycine max]	AT4G29790.1_serine/arginine repetitive matrix protein	.	0.0466667	0.0966667	0.22	0.24	0	0.14	0	0.29	0	0	0	0	0.66	0.72	0	0
Am_Tr_000310	283	GAY57266.1_hypothetical protein CUMW_178130 [Citrus unshiu] GAY57267.1 hypothetical protein CUMW_178130 [Citrus unshiu]	AT4G29790.1_serine/arginine repetitive matrix protein	.	0	0	0.393333	0	0	0	0	0	0	0	0	0	1.18	0	0	0
Am_Tr_000311	10326	KAH1201156.1_hypothetical protein GmHk_17G047931 [Glycine max]	AT4G29790.1_serine/arginine repetitive matrix protein	.	0.363333	0.236667	0.21	0.13	0.29	0.56	0.24	0	0.41	0.3	0	0.22	0.41	0.22	0.17	0
Am_Tr_000312	2806	XP_020239530.1_luminal-binding protein 4 [Cajanus cajan] KYP42326.1 Luminal-binding protein 4 [Cajanus cajan]	AT5G42020.1_Heat shock protein 70 (Hsp 70) family protein, GeneName=BIP2	IPR013126_Heat shock protein 70 family; IPR043129_ATPase, nucleotide binding domain; IPR029047_Heat shock protein 70kD, peptide-binding domain superfamily; IPR029048_Heat shock protein 70kD, C-terminal domain superfamily	35.3533	169.933	246.02	143.707	8.74	77.77	19.55	84.63	253.84	171.33	125.38	362.07	250.61	124.08	120.15	186.89
Am_Tr_000313	2896	XP_020239530.1_luminal-binding protein 4 [Cajanus cajan] KYP42326.1 Luminal-binding protein 4 [Cajanus cajan]	AT5G42020.1_Heat shock protein 70 (Hsp 70) family protein, GeneName=BIP2	IPR029047_Heat shock protein 70kD, peptide-binding domain superfamily; IPR043129_ATPase, nucleotide binding domain; IPR013126_Heat shock protein 70 family	0.563333	3.07333	4.97333	2.63333	0	0.88	0.81	0.27	6.46	2.49	3.51	7.25	4.16	1.01	4.13	2.76
Am_Tr_000314	1308	XP_026287900.1_heat shock 70 kDa protein cognate 4 [Frankliniella occidentalis] KAE8746182.1 Heat shock protein 70 [Frankliniella occidentalis]	AT5G02500.2_heat shock cognate protein 70-1, GeneName=HSC70-1	IPR043129_ATPase, nucleotide binding domain; IPR013126_Heat shock protein 70 family	0	0.966667	35.4167	0.04	0	0	0	0	1.31	1.59	85.25	12.95	8.05	0	0	0.12
Am_Tr_000315	1273	MBA0694860.1_hypothetical protein [Gossypium aridum]	AT5G02500.2_heat shock cognate protein 70-1, GeneName=HSC70-1	IPR043129_ATPase, nucleotide binding domain; IPR013126_Heat shock protein 70 family	158.36	71.5467	99.73	183.237	174.98	185.98	114.12	54.64	92.36	67.64	48.93	132.6	117.66	137.26	224.01	188.44
Am_Tr_000316	588	KAA0869156.1_molecular chaperone DnaK, partial [Enterobacter hormaechei]	AT3G12580.1_heat shock protein 70, GeneName=HSP70	IPR013126_Heat shock protein 70 family; IPR043129_ATPase, nucleotide binding domain	209.287	267.787	154.007	497.903	51.36	280.57	295.93	88.82	610.85	103.69	54.86	266.28	140.88	226.95	940.84	325.92
Am_Tr_000317	1472	XP_028212774.1_heat shock cognate 70 kDa protein 2-like isoform X2 [Glycine soja]	AT5G02500.2_heat shock cognate protein 70-1, GeneName=HSC70-1	IPR043129_ATPase, nucleotide binding domain; IPR013126_Heat shock protein 70 family	279.347	578.077	322.437	585.497	81.41	369.22	387.41	210.39	1243.46	280.38	81.02	546.39	339.9	195.11	1273.08	288.3
Am_Tr_000318	1454	GAU17805.1_hypothetical protein TSUD_171940 [Trifolium subterraneum]	AT5G02500.2_heat shock cognate protein 70-1, GeneName=HSC70-1	IPR013126_Heat shock protein 70 family; IPR043129_ATPase, nucleotide binding domain	599.11	1106.04	520.377	712.097	189.43	847.02	760.88	770.94	1527.52	1019.65	218.57	710.37	632.19	593.05	915.07	628.17
Am_Tr_000319	576	XP_026287900.1_heat shock 70 kDa protein cognate 4 [Frankliniella occidentalis] KAE8746182.1 Heat shock protein 70 [Frankliniella occidentalis]	AT3G12580.1_heat shock protein 70, GeneName=HSP70	IPR013126_Heat shock protein 70 family; IPR043129_ATPase, nucleotide binding domain	0	2.12667	52.94	0	0	0	0	0	2.66	3.72	130.86	17.35	10.61	0	0	0
Am_Tr_000320	1172	KXH51225.1_hsp70-like protein [Colletotrichum simmondsii]	AT5G02490.1_Heat shock protein 70 (Hsp 70) family protein, GeneName=Hsp70-2	IPR013126_Heat shock protein 70 family; IPR029047_Heat shock protein 70kD, peptide-binding domain superfamily; IPR029048_Heat shock protein 70kD, C-terminal domain superfamily; IPR043129_ATPase, nucleotide binding domain	9.94	0.113333	0	0.0333333	0.81	3.94	25.07	0	0.22	0.12	0	0	0	0	0	0.1
Am_Tr_000321	1349	KXH51225.1_hsp70-like protein [Colletotrichum simmondsii]	AT3G12580.1_heat shock protein 70, GeneName=HSP70	IPR029047_Heat shock protein 70kD, peptide-binding domain superfamily; IPR013126_Heat shock protein 70 family; IPR029048_Heat shock protein 70kD, C-terminal domain superfamily; IPR043129_ATPase, nucleotide binding domain	0.71	0.146667	14.9733	0.143333	0.09	0.6	1.44	0.25	0	0.19	20.4	7.03	17.49	0	0.09	0.34
Am_Tr_000322	390	PNX57649.1_HSP70, partial [Trifolium pratense] PNX86536.1 heat shock protein HSP70-2, partial [Trifolium pratense]	AT1G56410.1_heat shock protein 70 (Hsp 70) family protein, GeneName=ERD2	.	145.863	60.9067	83.6267	160.983	161.74	186.38	89.47	42.25	89.01	51.46	39.18	107.82	103.88	99.27	200.76	182.92
Am_Tr_000323	686	KAH1204526.1_Protein STRUBBELIG-RECEPTOR FAMILY 6 [Glycine max]	AT3G14350.3_STRUBBELIG-receptor family 7, GeneName=SRF7	IPR013210_Leucine-rich repeat-containing N-terminal, plant-type	0.29	1.35333	0.66	1.56333	0.87	0	0	3.14	0.92	0	1.59	0.39	0	3.49	1.2	0
Am_Tr_000324	522	.	.	.	1.33	0.776667	0.1	1.20333	3.34	0.65	0	0	2.33	0	0	0.3	0	2.77	0.84	0
Am_Tr_000325	2642	XP_027337895.1_protein STRUBBELIG-RECEPTOR FAMILY 6-like isoform X1 [Abrus precatorius]	AT1G53730.1_STRUBBELIG-receptor family 6, GeneName=SRF6	IPR013210_Leucine-rich repeat-containing N-terminal, plant-type; IPR001245_Serine-threonine/tyrosine-protein kinase, catalytic domain; IPR001611_Leucine-rich repeat; IPR011009_Protein kinase-like domain superfamily	81.1967	21.0267	35.8333	75.88	29.02	148	66.57	21.43	19.81	21.84	29.85	41.95	35.7	99.87	47.61	80.16
Am_Tr_000326	846	KAE9615321.1_putative protein kinase RLK-Pelle-LRR-V family [Lupinus albus] KAF1869124.1 hypothetical protein Lal_00048405 [Lupinus albus]	AT3G14350.3_STRUBBELIG-receptor family 7, GeneName=SRF7	.	1.06	2.60667	1.78	2.63667	2.56	0.62	0	5.27	2.55	0	3.44	1.9	0	5.06	2.85	0
Am_Tr_000327	257	.	.	.	0	1.91667	2.13333	0.36	0	0	0	1.85	3.9	0	3.08	3.32	0	1.08	0	0
Am_Tr_000328	943	KAE9595852.1_putative protein kinase RLK-Pelle-LRR-V family [Lupinus albus] KAF1863899.1 hypothetical protein Lal_00031027 [Lupinus albus]	AT3G14350.3_STRUBBELIG-receptor family 7, GeneName=SRF7	.	0.09	0.75	0	0.606667	0.27	0	0	0.97	1.28	0	0	0	0	1.32	0.5	0
Am_Tr_000329	2737	XP_027337895.1_protein STRUBBELIG-RECEPTOR FAMILY 6-like isoform X1 [Abrus precatorius]	AT3G14350.2_STRUBBELIG-receptor family 7, GeneName=SRF7	IPR011009_Protein kinase-like domain superfamily; IPR001245_Serine-threonine/tyrosine-protein kinase, catalytic domain	1.85667	0.346667	0.46	4.37667	0.83	1.65	3.09	0.51	0.29	0.24	0	0.52	0.86	8.18	2.8	2.15
Am_Tr_000330	2991	RDY06447.1_Protein STRUBBELIG-RECEPTOR FAMILY 6 [Mucuna pruriens]	AT3G14350.1_STRUBBELIG-receptor family 7, GeneName=SRF7	IPR013210_Leucine-rich repeat-containing N-terminal, plant-type	0.0166667	2.43667	0.62	0.46	0	0.05	0	3.59	0	3.72	0	1.73	0.13	0	1.24	0.14
Am_Tr_000331	2896	RDY06447.1_Protein STRUBBELIG-RECEPTOR FAMILY 6 [Mucuna pruriens]	AT3G14350.2_STRUBBELIG-receptor family 7, GeneName=SRF7	IPR013210_Leucine-rich repeat-containing N-terminal, plant-type	0.103333	0.776667	0.0966667	1.15333	0	0.31	0	0	2.33	0	0	0	0.29	2.61	0	0.85
Am_Tr_000332	2891	KAH1196230.1_Protein STRUBBELIG-RECEPTOR FAMILY 6 [Glycine max]	AT1G53730.1_STRUBBELIG-receptor family 6, GeneName=SRF6	IPR001611_Leucine-rich repeat; IPR013210_Leucine-rich repeat-containing N-terminal, plant-type	0.96	6.65333	2.17667	5.21667	0.58	1.99	0.31	5.64	11.12	3.2	2.25	1.38	2.9	4.27	7.4	3.98
Am_Tr_000333	2796	TKY61165.1_STRUBBELIG-RECEPTOR FAMILY 6 [Spatholobus suberectus]	AT3G14350.1_STRUBBELIG-receptor family 7, GeneName=SRF7	IPR001611_Leucine-rich repeat; IPR013210_Leucine-rich repeat-containing N-terminal, plant-type	8.78667	25.5967	15.08	24.1367	10.72	13.07	2.57	25.19	28.03	23.57	14.36	16.65	14.23	26.39	24.94	21.08
Am_Tr_000334	2915	TKY61165.1_STRUBBELIG-RECEPTOR FAMILY 6 [Spatholobus suberectus]	AT3G14350.1_STRUBBELIG-receptor family 7, GeneName=SRF7	IPR001611_Leucine-rich repeat; IPR013210_Leucine-rich repeat-containing N-terminal, plant-type	0	0.95	0.24	0.433333	0	0	0	1.89	0	0.96	0.55	0	0.17	0.2	0.87	0.23
Am_Tr_000335	2885	GAU46979.1_hypothetical protein TSUD_190160 [Trifolium subterraneum]	AT3G14350.2_STRUBBELIG-receptor family 7, GeneName=SRF7	IPR001611_Leucine-rich repeat	0	0	0	0.416667	0	0	0	0	0	0	0	0	0	0.68	0.28	0.29
Am_Tr_000336	3796	RDY02946.1_Leucine-rich repeat receptor-like serine/threonine-protein kinase BAM1, partial [Mucuna pruriens]	AT5G65700.1_Leucine-rich receptor-like protein kinase family protein, GeneName=BAM1	IPR011009_Protein kinase-like domain superfamily; IPR013210_Leucine-rich repeat-containing N-terminal, plant-type; IPR001245_Serine-threonine/tyrosine-protein kinase, catalytic domain; IPR000719_Protein kinase domain; IPR003591_Leucine-rich repeat, t	0.3	11.9767	16.5667	26.2367	0.24	0.51	0.15	6.85	17.6	11.48	10.97	20.36	18.37	24.66	25.33	28.72
Am_Tr_000337	529	XP_004497372.1_CDP-diacylglycerol--glycerol-3-phosphate 3-phosphatidyltransferase 2-like [Cicer arietinum]	.	.	3.69667	5.45667	8.89333	5.22333	2.28	1.51	7.3	0	12.15	4.22	12.2	6.81	7.67	3.91	5.31	6.45
Am_Tr_000338	539	XP_004497372.1_CDP-diacylglycerol--glycerol-3-phosphate 3-phosphatidyltransferase 2-like [Cicer arietinum]	.	.	0.64	3.15667	0.476667	0.336667	0	1.31	0.61	4.28	2.71	2.48	0	0.72	0.71	0	1.01	0
Am_Tr_000339	565	XP_004497372.1_CDP-diacylglycerol--glycerol-3-phosphate 3-phosphatidyltransferase 2-like [Cicer arietinum]	.	.	2.94	8.30667	8.29	3.99333	4.94	3.88	0	13.61	5.26	6.05	3.92	10.48	10.47	6.06	3.5	2.42
Am_Tr_000340	709	XP_027190883.1_VQ motif-containing protein 9 isoform X6 [Cicer arietinum] XP_027190884.1 VQ motif-containing protein 9 isoform X6 [Cicer arietinum] XP_027190885.1 VQ motif-containing protein 9 isoform X6 [Cicer arietinum] XP_027190886.1 VQ motif-containing protein 9 isoform X6 [Cicer arietinum]	AT1G78310.1_VQ motif-containing protein	IPR008889_VQ	31.21	23.59	12.76	16.4833	27.76	21.53	44.34	22.14	27.04	21.59	5.88	16.45	15.95	18.68	15.57	15.2
Am_Tr_000341	2578	KHM99687.1_Leucine-rich repeat receptor-like serine/threonine-protein kinase BAM3 [Glycine soja]	AT4G20270.1_Leucine-rich receptor-like protein kinase family protein, GeneName=BAM3	IPR000719_Protein kinase domain; IPR001611_Leucine-rich repeat; IPR011009_Protein kinase-like domain superfamily; IPR003591_Leucine-rich repeat, typical subtype	0	1.05667	1.03	1.34	0	0	0	0.71	1.68	0.78	0.68	1.34	1.07	1.26	1.04	1.72
Am_Tr_000342	3511	XP_004491265.1_leucine-rich repeat receptor-like serine/threonine-protein kinase BAM3 [Cicer arietinum]	AT4G20270.1_Leucine-rich receptor-like protein kinase family protein, GeneName=BAM3	IPR003591_Leucine-rich repeat, typical subtype; IPR013210_Leucine-rich repeat-containing N-terminal, plant-type; IPR000719_Protein kinase domain; IPR001611_Leucine-rich repeat; IPR011009_Protein kinase-like domain superfamily	0.25	1.52667	3.22	6.10333	0.26	0.35	0.14	0.87	2.51	1.2	3.16	3.32	3.18	5.18	5.98	7.15
Am_Tr_000343	3478	XP_004491265.1_leucine-rich repeat receptor-like serine/threonine-protein kinase BAM3 [Cicer arietinum]	AT4G20270.1_Leucine-rich receptor-like protein kinase family protein, GeneName=BAM3	IPR003591_Leucine-rich repeat, typical subtype; IPR000719_Protein kinase domain; IPR013210_Leucine-rich repeat-containing N-terminal, plant-type; IPR001611_Leucine-rich repeat; IPR011009_Protein kinase-like domain superfamily	0	0	0	0	0	0	0	0	0	0	0	0	0	0	0	0
Am_Tr_000344	416	.	.	.	1.39333	2.98333	1.70667	3.81	1.96	0.99	1.23	2.8	3.24	2.91	0.8	1.81	2.51	5.21	2.91	3.31
Am_Tr_000345	452	.	.	.	1.36333	1.32333	1.83	3.64333	0.83	2.92	0.34	1.19	1.37	1.41	1.01	3.07	1.41	6.04	2.47	2.42
Am_Tr_000346	975	XP_007140553.1_hypothetical protein PHAVU_008G122200g [Phaseolus vulgaris] ESW12547.1 hypothetical protein PHAVU_008G122200g [Phaseolus vulgaris]	AT5G48940.1_Leucine-rich repeat transmembrane protein kinase family protein	IPR001611_Leucine-rich repeat; IPR013210_Leucine-rich repeat-containing N-terminal, plant-type	0.0433333	0.0466667	0.306667	0.253333	0.13	0	0	0	0.14	0	0	0.6	0.32	0.13	0	0.63
Am_Tr_000347	242	MCI43280.1_LRR receptor-like serine/threonine-protein kinase RCH1-like [Trifolium medium]	AT5G48940.1_Leucine-rich repeat transmembrane protein kinase family protein	.	21.4467	0	0	0	38.09	26.25	0	0	0	0	0	0	0	0	0	0
Am_Tr_000348	2888	XP_013448805.1_LRR receptor-like serine/threonine-protein kinase RCH1 [Medicago truncatula] KEH22832.1 LRR receptor-like kinase family protein [Medicago truncatula] RHN46029.1 putative protein kinase RLK-Pelle-LRR-XI-1 family [Medicago truncatula]	AT3G24240.1_Leucine-rich repeat receptor-like protein kinase family protein	IPR000719_Protein kinase domain; IPR003591_Leucine-rich repeat, typical subtype; IPR001245_Serine-threonine/tyrosine-protein kinase, catalytic domain; IPR011009_Protein kinase-like domain superfamily	0.0133333	0.0533333	0.193333	0.59	0.04	0	0	0	0.16	0	0.3	0.1	0.18	0.79	0.15	0.83
Am_Tr_000349	469	.	.	.	0.473333	0.576667	0.106667	0.256667	0	0.78	0.64	0.74	0	0.99	0.32	0	0	0.38	0.39	0
Am_Tr_000350	3017	XP_004511648.1_SNARE-interacting protein KEULE-like isoform X1 [Cicer arietinum]	AT1G12360.1_Sec1/munc18-like (SM) proteins superfamily, GeneName=KEU	IPR001619_Sec1-like protein; IPR036045_Sec1-like superfamily	16.22	4.55	3.71333	11.8533	8.2	25.77	14.69	4.52	6.06	3.07	2.89	3.62	4.63	14.79	9.18	11.59
Am_Tr_000351	2781	XP_027359931.1_SNARE-interacting protein KEULE-like isoform X1 [Abrus precatorius]	AT1G12360.1_Sec1/munc18-like (SM) proteins superfamily, GeneName=KEU	IPR001619_Sec1-like protein; IPR036045_Sec1-like superfamily	99.75	35.0867	35.37	35.3533	113.73	82.53	102.99	30.36	44.61	30.29	21.15	41.55	43.41	25.47	43.2	37.39
Am_Tr_000352	1305	XP_042491072.1_SNARE-interacting protein KEULE-like [Macadamia integrifolia]	AT1G12360.1_Sec1/munc18-like (SM) proteins superfamily, GeneName=KEU	.	1.95	0.08	0.123333	0.713333	1.63	2.73	1.49	0.13	0	0.11	0.1	0.27	0	1.32	0.14	0.68
Am_Tr_000353	1811	AFK39976.1_unknown [Lotus japonicus]	AT1G12360.1_Sec1/munc18-like (SM) proteins superfamily, GeneName=KEU	IPR036045_Sec1-like superfamily; IPR001619_Sec1-like protein	1.19333	0	0.0733333	0.106667	0.54	0.18	2.86	0	0	0	0.14	0	0.08	0.32	0	0
Am_Tr_000354	4279	XP_004511648.1_SNARE-interacting protein KEULE-like isoform X1 [Cicer arietinum]	AT1G12360.1_Sec1/munc18-like (SM) proteins superfamily, GeneName=KEU	IPR001619_Sec1-like protein; IPR036045_Sec1-like superfamily	0.0333333	0.0633333	0.146667	0.326667	0	0.07	0.03	0.19	0	0	0	0	0.44	0.62	0.36	0
Am_Tr_000355	4359	XP_004511648.1_SNARE-interacting protein KEULE-like isoform X1 [Cicer arietinum]	AT1G12360.1_Sec1/munc18-like (SM) proteins superfamily, GeneName=KEU	IPR001619_Sec1-like protein; IPR036045_Sec1-like superfamily	0.193333	0.903333	1.15333	3.27	0	0.4	0.18	2.02	0.49	0.2	0.01	1.27	2.18	6.96	1.23	1.62
Am_Tr_000356	4203	PNY04212.1_SNARE-interacting protein KEULE [Trifolium pratense]	AT1G12360.1_Sec1/munc18-like (SM) proteins superfamily, GeneName=KEU	IPR036045_Sec1-like superfamily; IPR001619_Sec1-like protein	7.63333	4.76	1.66	7.38667	1.08	13.97	7.85	5.35	3.54	5.39	1.62	2.33	1.03	12.58	2.72	6.86
Am_Tr_000357	2937	XP_004511648.1_SNARE-interacting protein KEULE-like isoform X1 [Cicer arietinum]	AT1G12360.1_Sec1/munc18-like (SM) proteins superfamily, GeneName=KEU	IPR001619_Sec1-like protein; IPR036045_Sec1-like superfamily	3.52	19.1367	9.85333	15.49	0	9.08	1.48	16.19	17.91	23.31	4.21	14.14	11.21	7.28	21.78	17.41
Am_Tr_000358	4123	PNY04212.1_SNARE-interacting protein KEULE [Trifolium pratense]	AT1G12360.1_Sec1/munc18-like (SM) proteins superfamily, GeneName=KEU	IPR036045_Sec1-like superfamily; IPR001619_Sec1-like protein	1.3	0.143333	0.06	0.59	0	2.62	1.28	0.43	0	0	0	0	0.18	1	0.77	0
Am_Tr_000359	3228	XP_027193492.1_protein transport Sec1a-like isoform X1 [Cicer arietinum]	AT1G02010.1_secretory 1A, GeneName=SEC1A	IPR001619_Sec1-like protein; IPR036045_Sec1-like superfamily	0.19	0.04	0.14	0.00666667	0.56	0.01	0	0	0	0.12	0.42	0	0	0	0.02	0
Am_Tr_000360	3144	XP_027193492.1_protein transport Sec1a-like isoform X1 [Cicer arietinum]	AT1G02010.1_secretory 1A, GeneName=SEC1A	IPR001619_Sec1-like protein; IPR036045_Sec1-like superfamily	0.58	0.2	0.19	0.583333	0.47	0.31	0.96	0.09	0.51	0	0.19	0.38	0	0.57	0.56	0.62
Am_Tr_000361	2508	XP_004506504.1_protein transport Sec1a-like [Cicer arietinum]	AT1G02010.1_secretory 1A, GeneName=SEC1A	IPR001619_Sec1-like protein; IPR036045_Sec1-like superfamily	7.27333	3.12333	6.58333	4.81	6.65	8.02	7.15	2.56	2.86	3.95	5.04	7.37	7.34	4.92	4.44	5.07
Am_Tr_000362	2696	XP_004506504.1_protein transport Sec1a-like [Cicer arietinum]	AT1G02010.3_secretory 1A, GeneName=SEC1A	IPR036045_Sec1-like superfamily; IPR001619_Sec1-like protein	0.123333	0.01	0.326667	0.0866667	0	0.37	0	0	0	0.03	0.19	0.17	0.62	0.26	0	0
Am_Tr_000363	2592	XP_004506504.1_protein transport Sec1a-like [Cicer arietinum]	AT1G02010.1_secretory 1A, GeneName=SEC1A	IPR001619_Sec1-like protein; IPR036045_Sec1-like superfamily	0.33	0.246667	0.423333	0.08	0.23	0.19	0.57	0	0.17	0.57	0.9	0.22	0.15	0	0.24	0
Am_Tr_000364	3332	XP_004506504.1_protein transport Sec1a-like [Cicer arietinum]	AT1G02010.3_secretory 1A, GeneName=SEC1A	IPR036045_Sec1-like superfamily; IPR001619_Sec1-like protein	0	0.0833333	0.06	0.123333	0	0	0	0	0	0.25	0	0.01	0.17	0	0	0.37
Am_Tr_000365	629	.	.	.	0.143333	0.0866667	0.203333	0.08	0	0.24	0.19	0	0.26	0	0.39	0.22	0	0	0.24	0
Am_Tr_000366	562	.	.	.	0	0	0.246667	0.183333	0	0	0	0	0	0	0	0.26	0.48	0	0	0.55
Am_Tr_000367	1792	XP_004509061.1_telomere repeat-binding factor 2 isoform X2 [Cicer arietinum]	AT1G49950.1_telomere repeat binding factor 1, GeneName=TRB1	IPR036390_Winged helix DNA-binding domain superfamily; IPR009057_Homeobox-like domain superfamily; IPR005818_Linker histone H1/H5, domain H15; IPR001005_SANT/Myb domain; IPR017930_Myb domain	5.91333	8.13333	9.15333	13.7267	5.77	8.02	3.95	8.08	9.15	7.17	10.39	8.41	8.66	13.63	13.12	14.43
Am_Tr_000368	2432	XP_004509061.1_telomere repeat-binding factor 2 isoform X2 [Cicer arietinum]	AT1G49950.1_telomere repeat binding factor 1, GeneName=TRB1	IPR036390_Winged helix DNA-binding domain superfamily; IPR009057_Homeobox-like domain superfamily; IPR005818_Linker histone H1/H5, domain H15; IPR001005_SANT/Myb domain; IPR017930_Myb domain	0.166667	0.253333	0.4	0.156667	0	0.22	0.28	0.34	0.13	0.29	0.22	0.23	0.75	0.12	0	0.35
Am_Tr_000369	1252	XP_004509061.1_telomere repeat-binding factor 2 isoform X2 [Cicer arietinum]	AT1G49950.1_telomere repeat binding factor 1, GeneName=TRB1	IPR036390_Winged helix DNA-binding domain superfamily; IPR009057_Homeobox-like domain superfamily; IPR005818_Linker histone H1/H5, domain H15; IPR001005_SANT/Myb domain; IPR017930_Myb domain	1.43667	1.06333	3.96	1.15333	0.94	1.7	1.67	0.03	1.97	1.19	1.48	5.14	5.26	0	1.51	1.95
Am_Tr_000370	1887	XP_012573675.1_telomere repeat-binding factor 2 isoform X1 [Cicer arietinum] XP_027192421.1 telomere repeat-binding factor 2 isoform X1 [Cicer arietinum]	AT1G49950.1_telomere repeat binding factor 1, GeneName=TRB1	IPR036390_Winged helix DNA-binding domain superfamily; IPR009057_Homeobox-like domain superfamily; IPR017930_Myb domain; IPR005818_Linker histone H1/H5, domain H15; IPR001005_SANT/Myb domain	0.286667	0.436667	0	0	0	0.67	0.19	0.25	0.58	0.48	0	0	0	0	0	0
Am_Tr_000371	1619	XP_027360708.1_telomere repeat-binding factor 2-like [Abrus precatorius] XP_027360709.1 telomere repeat-binding factor 2-like [Abrus precatorius] XP_027360710.1 telomere repeat-binding factor 2-like [Abrus precatorius] XP_027360711.1 telomere repeat-binding factor 2-like [Abrus precatorius]	AT5G67580.2_Homeodomain-like/winged-helix DNA-binding family protein, GeneName=TRB2	IPR017930_Myb domain; IPR001005_SANT/Myb domain; IPR009057_Homeobox-like domain superfamily	0	0.216667	0	0.576667	0	0	0	0.29	0	0.36	0	0	0	1.12	0.4	0.21
Am_Tr_000372	1719	XP_027360708.1_telomere repeat-binding factor 2-like [Abrus precatorius] XP_027360709.1 telomere repeat-binding factor 2-like [Abrus precatorius] XP_027360710.1 telomere repeat-binding factor 2-like [Abrus precatorius] XP_027360711.1 telomere repeat-binding factor 2-like [Abrus precatorius]	AT1G49950.1_telomere repeat binding factor 1, GeneName=TRB1	IPR036390_Winged helix DNA-binding domain superfamily; IPR017930_Myb domain; IPR009057_Homeobox-like domain superfamily; IPR001005_SANT/Myb domain; IPR005818_Linker histone H1/H5, domain H15	9.74333	21.6367	16.75	27.66	9.22	13.96	6.05	19.59	23.66	21.66	13.3	19.01	17.94	23.84	31.14	28
Am_Tr_000373	2179	XP_027360708.1_telomere repeat-binding factor 2-like [Abrus precatorius] XP_027360709.1 telomere repeat-binding factor 2-like [Abrus precatorius] XP_027360710.1 telomere repeat-binding factor 2-like [Abrus precatorius] XP_027360711.1 telomere repeat-binding factor 2-like [Abrus precatorius]	AT5G67580.2_Homeodomain-like/winged-helix DNA-binding family protein, GeneName=TRB2	IPR005818_Linker histone H1/H5, domain H15; IPR036390_Winged helix DNA-binding domain superfamily	0.48	0.993333	1.14	0.533333	0.14	0.26	1.04	0.45	1.69	0.84	0.41	1.48	1.53	0.32	1.02	0.26
Am_Tr_000374	248	.	.	.	0	0	0	1.37667	0	0	0	0	0	0	0	0	0	0	0	4.13
Am_Tr_000375	6921	XP_004485595.1_splicing factor 3B subunit 1 [Cicer arietinum]	AT5G64270.1_splicing factor	IPR015016_Splicing factor 3B subunit 1; IPR016024_Armadillo-type fold; IPR034085_TOG domain	2.89667	5.39	2.06	2.29333	2.97	2.51	3.21	4.07	5.98	6.12	2.06	2.09	2.03	3.08	2.01	1.79
Am_Tr_000376	6561	XP_004485595.1_splicing factor 3B subunit 1 [Cicer arietinum]	AT5G64270.1_splicing factor	IPR015016_Splicing factor 3B subunit 1; IPR016024_Armadillo-type fold; IPR034085_TOG domain	1.86667	3.66	3.31667	6.03	1.87	2.54	1.19	3.58	4	3.4	4.08	3.03	2.84	7.47	4.17	6.45
Am_Tr_000377	7403	XP_004485595.1_splicing factor 3B subunit 1 [Cicer arietinum]	AT5G64270.1_splicing factor	IPR015016_Splicing factor 3B subunit 1; IPR016024_Armadillo-type fold; IPR034085_TOG domain	1.43333	4.27667	2.84	3.27	1.5	1.86	0.94	5.8	3.97	3.06	2.22	3.31	2.99	3.78	3.33	2.7
Am_Tr_000378	4057	XP_004485595.1_splicing factor 3B subunit 1 [Cicer arietinum]	AT5G64270.1_splicing factor	IPR015016_Splicing factor 3B subunit 1; IPR016024_Armadillo-type fold; IPR034085_TOG domain	18.8733	24.07	16.95	25.7933	25.65	19.4	11.57	23.78	26.71	21.72	6.5	23.16	21.19	15.57	32.64	29.17
Am_Tr_000379	3971	QHO15134.1_Splicing factor 3B subunit [Arachis hypogaea]	AT5G64270.1_splicing factor	IPR034085_TOG domain; IPR015016_Splicing factor 3B subunit 1; IPR016024_Armadillo-type fold	0.0666667	0	0.22	0.0933333	0	0.2	0	0	0	0	0.66	0	0	0	0.21	0.07
Am_Tr_000380	3736	QHO15134.1_Splicing factor 3B subunit [Arachis hypogaea]	AT5G64270.1_splicing factor	IPR034085_TOG domain; IPR015016_Splicing factor 3B subunit 1; IPR016024_Armadillo-type fold	21.0067	2.36667	4.16	3.61	13.21	32.44	17.37	1.9	3.19	2.01	2.78	5.28	4.42	2.31	4.91	3.61
Am_Tr_000381	788	.	.	.	1.01333	0.383333	0.346667	0.17	0.34	1.19	1.51	0.16	0.55	0.44	0.28	0.47	0.29	0.17	0.34	0
Am_Tr_000382	2766	XP_013470288.2_pentatricopeptide repeat-containing protein At2g35130 [Medicago truncatula]	AT2G35130.3_Tetratricopeptide repeat (TPR)-like superfamily protein	IPR002885_Pentatricopeptide repeat	0	5.48333	0.07	1.43333	0	0	0	4.63	5.59	6.23	0	0.09	0.12	1.8	1.08	1.42
Am_Tr_000383	2022	XP_013470288.2_pentatricopeptide repeat-containing protein At2g35130 [Medicago truncatula]	AT2G35130.3_Tetratricopeptide repeat (TPR)-like superfamily protein	IPR011990_Tetratricopeptide-like helical domain superfamily; IPR002885_Pentatricopeptide repeat; IPR033443_Pentacotripeptide-repeat region of PRORP	0	37.2	0.283333	7.52333	0	0	0	37.18	29.28	45.14	0.3	0.29	0.26	10.79	4.12	7.66
Am_Tr_000384	3077	XP_045806459.1_pentatricopeptide repeat-containing protein At3g16010 [Trifolium pratense]	AT3G16010.1_Pentatricopeptide repeat (PPR-like) superfamily protein	IPR002885_Pentatricopeptide repeat; IPR011990_Tetratricopeptide-like helical domain superfamily	3.24667	4.06667	2.06333	3.65	4.51	2.97	2.26	4.68	3.38	4.14	1.26	2.66	2.27	3.34	3.44	4.17
Am_Tr_000385	3524	GAU11017.1_hypothetical protein TSUD_113100 [Trifolium subterraneum]	AT3G16010.1_Pentatricopeptide repeat (PPR-like) superfamily protein	IPR002885_Pentatricopeptide repeat; IPR011990_Tetratricopeptide-like helical domain superfamily	0.176667	0.956667	0.34	0.58	0.24	0.13	0.16	1.29	0.77	0.81	0.08	0.33	0.61	0.48	0.39	0.87
Am_Tr_000386	2565	XP_004499354.1_uncharacterized protein LOC101492768 [Cicer arietinum]	AT5G39960.1_GTP-binding protein	.	0.406667	0.726667	0.92	1.65	0.63	0.59	0	0.68	0.82	0.68	1.04	0.33	1.39	1.76	0.5	2.69
Am_Tr_000387	2343	XP_004499354.1_uncharacterized protein LOC101492768 [Cicer arietinum]	AT5G39960.1_GTP-binding protein	IPR032859_GTPase Der, C-terminal KH-domain-like; IPR006073_GTP binding domain; IPR027417_P-loop containing nucleoside triphosphate hydrolase; IPR005225_Small GTP-binding protein domain; IPR016484_GTP-binding protein EngA	4.56333	18.2	19.6167	17.1033	3.14	7.69	2.86	16.15	19.09	19.36	18.12	21.39	19.34	14.87	15.99	20.45
Am_Tr_000388	2725	XP_004499354.1_uncharacterized protein LOC101492768 [Cicer arietinum]	AT5G39960.1_GTP-binding protein	.	0	0.0666667	0	0.24	0	0	0	0.17	0.03	0	0	0	0	0	0.72	0
Am_Tr_000389	2843	XP_004499354.1_uncharacterized protein LOC101492768 [Cicer arietinum]	AT5G39960.1_GTP-binding protein	.	0.103333	0.51	0.00666667	0.1	0	0.31	0	0	1.21	0.32	0	0.02	0	0	0.3	0
Am_Tr_000390	2245	PNX71948.1_GTPase Der protein [Trifolium pratense]	AT5G39960.1_GTP-binding protein	.	0.0666667	0.536667	0.356667	1.21	0.2	0	0	1.1	0.51	0	0.61	0.13	0.33	1.84	0.43	1.36
Am_Tr_000391	1902	XP_027331959.1_uncharacterized protein LOC113847204 isoform X2 [Abrus precatorius] XP_027331960.1 uncharacterized protein LOC113847204 isoform X2 [Abrus precatorius]	AT5G39960.1_GTP-binding protein	.	0.1	0.676667	1.12667	0.82	0.2	0	0.1	0.83	0.81	0.39	2.28	0.77	0.33	0.68	1.54	0.24
Am_Tr_000392	2771	XP_004499354.1_uncharacterized protein LOC101492768 [Cicer arietinum]	AT5G39960.1_GTP-binding protein	.	0.29	0.346667	1.15667	0.723333	0	0.54	0.33	0	0.02	1.02	0	1.82	1.65	0	0.79	1.38
Am_Tr_000393	2317	PNX71948.1_GTPase Der protein [Trifolium pratense]	AT5G39960.1_GTP-binding protein	.	0	0	1.16	0.286667	0	0	0	0	0	0	2.78	0.7	0	0.04	0.82	0
Am_Tr_000394	683	MCI28477.1_F-box/LRR-repeat protein [Trifolium medium]	AT2G41460.4_apurinic endonuclease-redox protein, GeneName=ARP	.	5.16667	6.84667	4.38	6.14	11.76	1.01	2.73	7.02	3.17	10.35	7.8	1.41	3.93	7.16	2.76	8.5
Am_Tr_000395	5560	XP_020212452.1_O-fucosyltransferase 31 [Cajanus cajan] KYP70062.1 DUF246 domain-containing protein At1g04910 family [Cajanus cajan]	AT4G24530.1_O-fucosyltransferase family protein	IPR019378_GDP-fucose protein O-fucosyltransferase	0.123333	1.36333	0.55	1.17333	0	0.18	0.19	1.3	1.38	1.41	0.35	0.46	0.84	0.92	1.5	1.1
Am_Tr_000396	5516	XP_027354871.1_O-fucosyltransferase 31-like [Abrus precatorius]	AT4G24530.1_O-fucosyltransferase family protein	IPR019378_GDP-fucose protein O-fucosyltransferase	0.313333	1.5	0.906667	3.7	0.12	0.48	0.34	1.51	1.19	1.8	0.33	1.15	1.24	4.19	4.37	2.54
Am_Tr_000397	948	MCI28477.1_F-box/LRR-repeat protein [Trifolium medium]	AT2G41460.4_apurinic endonuclease-redox protein, GeneName=ARP	.	0.176667	2.83333	0.673333	1.74667	0	0.15	0.38	3.34	0.98	4.18	0	1.02	1	3.25	1.36	0.63
Am_Tr_000398	3030	XP_027942180.1_O-fucosyltransferase 31 isoform X2 [Vigna unguiculata]	AT4G24530.1_O-fucosyltransferase family protein	IPR019378_GDP-fucose protein O-fucosyltransferase	0	0	0	0	0	0	0	0	0	0	0	0	0	0	0	0
Am_Tr_000399	1902	XP_020212452.1_O-fucosyltransferase 31 [Cajanus cajan] KYP70062.1 DUF246 domain-containing protein At1g04910 family [Cajanus cajan]	AT4G24530.1_O-fucosyltransferase family protein	IPR019378_GDP-fucose protein O-fucosyltransferase	9.99667	0.9	1.88667	5.65	4.44	14.19	11.36	2.07	0.63	0	4.94	0.65	0.07	11.8	5.15	0
Am_Tr_000400	6171	XP_027942180.1_O-fucosyltransferase 31 isoform X2 [Vigna unguiculata]	AT4G24530.1_O-fucosyltransferase family protein	IPR019378_GDP-fucose protein O-fucosyltransferase	0	0	0	0	0	0	0	0	0	0	0	0	0	0	0	0
Am_Tr_000401	4520	XP_027354871.1_O-fucosyltransferase 31-like [Abrus precatorius]	AT4G24530.1_O-fucosyltransferase family protein	IPR019378_GDP-fucose protein O-fucosyltransferase	3.73667	3.20333	2.23333	3.57	2.27	6.23	2.71	2.7	3.91	3	1.11	2.92	2.67	2.5	2.56	5.65
Am_Tr_000402	2321	XP_020212452.1_O-fucosyltransferase 31 [Cajanus cajan] KYP70062.1 DUF246 domain-containing protein At1g04910 family [Cajanus cajan]	AT4G24530.1_O-fucosyltransferase family protein	IPR019378_GDP-fucose protein O-fucosyltransferase	0.123333	1.84667	2.66	2.64333	0.37	0	0	2.08	1.4	2.06	3.84	1.37	2.77	3.21	0.98	3.74
Am_Tr_000403	1671	XP_020212452.1_O-fucosyltransferase 31 [Cajanus cajan] KYP70062.1 DUF246 domain-containing protein At1g04910 family [Cajanus cajan]	AT4G24530.1_O-fucosyltransferase family protein	IPR024709_Putative O-fucosyltransferase, plant; IPR019378_GDP-fucose protein O-fucosyltransferase	2.2	5.22	7.2	8.07333	1.67	3.61	1.32	3.79	5.14	6.73	8.73	6.74	6.13	7.05	8.03	9.14
Am_Tr_000404	2763	XP_045820033.1_O-fucosyltransferase 31 [Trifolium pratense]	AT4G24530.1_O-fucosyltransferase family protein	IPR019378_GDP-fucose protein O-fucosyltransferase	2.01	2.14667	1.09	1.98	0.9	3.26	1.87	2.11	2.5	1.83	1.16	0.57	1.54	2.32	2.35	1.27
Am_Tr_000405	2159	XP_020212452.1_O-fucosyltransferase 31 [Cajanus cajan] KYP70062.1 DUF246 domain-containing protein At1g04910 family [Cajanus cajan]	AT4G24530.1_O-fucosyltransferase family protein	IPR019378_GDP-fucose protein O-fucosyltransferase	3.21	9.23667	7.43667	9.42667	2.02	4.27	3.34	5.79	10.53	11.39	5.77	9.21	7.33	6.49	9.23	12.56
Am_Tr_000406	6269	XP_027942180.1_O-fucosyltransferase 31 isoform X2 [Vigna unguiculata]	AT4G24530.1_O-fucosyltransferase family protein	IPR019378_GDP-fucose protein O-fucosyltransferase	0	0	0	0	0	0	0	0	0	0	0	0	0	0	0	0
Am_Tr_000407	5175	XP_027942180.1_O-fucosyltransferase 31 isoform X2 [Vigna unguiculata]	AT4G24530.1_O-fucosyltransferase family protein	IPR019378_GDP-fucose protein O-fucosyltransferase	0	0	0	0	0	0	0	0	0	0	0	0	0	0	0	0
Am_Tr_000408	844	OIV90457.1_hypothetical protein TanjilG_01935 [Lupinus angustifolius]	AT2G41460.4_apurinic endonuclease-redox protein, GeneName=ARP	.	0.336667	2.01	2.69333	2.38667	0.65	0	0.36	2.18	1.19	2.66	3.77	1.19	3.12	2.69	0	4.47
Am_Tr_000409	5099	XP_027942180.1_O-fucosyltransferase 31 isoform X2 [Vigna unguiculata]	AT5G65470.1_O-fucosyltransferase family protein	IPR019378_GDP-fucose protein O-fucosyltransferase	0.516667	0.46	0.726667	1.2	0	0.32	1.23	0.71	0.33	0.34	0.46	1.2	0.52	2.06	0.94	0.6
Am_Tr_000410	2868	XP_027942180.1_O-fucosyltransferase 31 isoform X2 [Vigna unguiculata]	AT4G24530.1_O-fucosyltransferase family protein	IPR019378_GDP-fucose protein O-fucosyltransferase	0	0	0	0	0	0	0	0	0	0	0	0	0	0	0	0
Am_Tr_000411	290	XP_007136337.1_hypothetical protein PHAVU_009G0371001g, partial [Phaseolus vulgaris] ESW08331.1 hypothetical protein PHAVU_009G0371001g, partial [Phaseolus vulgaris]	AT4G24530.1_O-fucosyltransferase family protein	.	0	0	0	0	0	0	0	0	0	0	0	0	0	0	0	0
Am_Tr_000412	2721	XP_004502465.1_long chain acyl-CoA synthetase 9, chloroplastic-like [Cicer arietinum]	AT1G77590.1_long chain acyl-CoA synthetase 9, GeneName=LACS9	IPR000873_AMP-dependent synthetase/ligase	25.9633	23.5867	26.82	34.1533	18.29	32.39	27.21	18.4	27.92	24.44	23.45	28.84	28.17	26.49	31.29	44.68
Am_Tr_000413	2537	XP_004498337.1_long chain acyl-CoA synthetase 9, chloroplastic-like [Cicer arietinum]	AT1G77590.1_long chain acyl-CoA synthetase 9, GeneName=LACS9	IPR000873_AMP-dependent synthetase/ligase	2.33	14.8133	11.3333	7.95	1.8	3.18	2.01	12.39	17.64	14.41	8.67	13.92	11.41	8.58	6.26	9.01
Am_Tr_000414	2501	RDX71938.1_Auxin response factor 18, partial [Mucuna pruriens]	AT4G30080.1_auxin response factor 16, GeneName=ARF16	.	0.69	0	0	0	2.07	0	0	0	0	0	0	0	0	0	0	0
Am_Tr_000415	1528	RDX71938.1_Auxin response factor 18, partial [Mucuna pruriens]	AT4G30080.1_auxin response factor 16, GeneName=ARF16	.	0.676667	0.176667	0.37	0.24	1.35	0.33	0.35	0	0	0.53	1.11	0	0	0.2	0.21	0.31
Am_Tr_000416	1147	MCH98094.1_hypothetical protein [Trifolium medium]	AT1G65230.1_transmembrane protein, putative (DUF2358)	.	6.90333	8.34667	1.21667	5.81	2.64	15.09	2.98	8.42	4.68	11.94	0	0	3.65	5.2	7.05	5.18
Am_Tr_000417	2591	PNX61108.1_protein dehydration-induced 19-like [Trifolium pratense]	.	.	0.0866667	0	0.0633333	0.27	0	0.26	0	0	0	0	0	0	0.19	0.15	0	0.66
Am_Tr_000418	9029	XP_004505180.1_kinesin-like protein KIN-12D isoform X1 [Cicer arietinum]	AT3G19050.1_phragmoplast orienting kinesin 2, GeneName=POK2	IPR001752_Kinesin motor domain; IPR027417_P-loop containing nucleoside triphosphate hydrolase	0.00333333	0.273333	1.09	1.00333	0	0	0.01	0.2	0.42	0.2	0.54	1.08	1.65	0.57	0.49	1.95
Am_Tr_000419	2594	RDX71938.1_Auxin response factor 18, partial [Mucuna pruriens]	AT4G30080.1_auxin response factor 16, GeneName=ARF16	.	2.62	3.85	3.89667	6.4	0.73	3.54	3.59	3.69	5.15	2.71	2.85	4.88	3.96	4.74	10.14	4.32
Am_Tr_000420	2684	PNX61108.1_protein dehydration-induced 19-like [Trifolium pratense]	.	.	0.913333	2.00333	2.17667	2.22	0	1.95	0.79	0.03	3.46	2.52	1.07	2.39	3.07	3.66	0	3
Am_Tr_000421	2041	RDX71938.1_Auxin response factor 18, partial [Mucuna pruriens]	AT4G30080.1_auxin response factor 16, GeneName=ARF16	.	0.0766667	0	0.0533333	0.156667	0	0	0.23	0	0	0	0	0	0.16	0	0.47	0
Am_Tr_000422	1609	KAG4982474.1_hypothetical protein JHK87_027223 [Glycine soja]	.	.	1.75667	1.67	1.74333	1.60667	3.36	0.57	1.34	2.4	0.48	2.13	2.68	0.53	2.02	2.18	0.59	2.05
Am_Tr_000423	2134	RDX71938.1_Auxin response factor 18, partial [Mucuna pruriens]	AT4G30080.1_auxin response factor 16, GeneName=ARF16	.	11.2933	10.9533	10.4233	11.57	19.07	7.13	7.68	7.85	11.98	13.03	7.44	11.76	12.07	12.21	7.84	14.66
Am_Tr_000424	1454	MCH98094.1_hypothetical protein [Trifolium medium]	AT1G65230.1_transmembrane protein, putative (DUF2358)	.	30.0267	34.8767	27.3767	18.74	38.63	24.58	26.87	31.69	41.66	31.28	36.09	24.32	21.72	22.54	17.39	16.29
Am_Tr_000425	867	RDX71938.1_Auxin response factor 18, partial [Mucuna pruriens]	AT4G30080.1_auxin response factor 16, GeneName=ARF16	.	0.72	0.753333	1.16667	0.993333	0.33	1.06	0.77	0.16	1.38	0.72	1.74	0.92	0.84	1.08	0.83	1.07
Am_Tr_000426	973	.	.	.	2.68	1.94	2.28	1.42667	5.12	1.43	1.49	1.82	3.08	0.92	1.79	2.78	2.27	0	1.71	2.57
Am_Tr_000427	752	.	.	.	11.7733	10.9867	5.63	8.20333	12.39	10.79	12.14	8.34	11.69	12.93	5.48	4.1	7.31	11.68	6.7	6.23
Am_Tr_000428	1628	.	.	.	1.95	1.98	1.40333	3.58	2.53	1.75	1.57	2.28	2.01	1.65	1.39	1.46	1.36	4.9	2.18	3.66
Am_Tr_000429	2224	PNX61108.1_protein dehydration-induced 19-like [Trifolium pratense]	.	.	0.906667	0.403333	0.0133333	1.63667	2.72	0	0	1.21	0	0	0.04	0	0	0	4.91	0
Am_Tr_000430	2317	RHN42769.1_putative transferase, protein kinase TKL-Pl-5 family [Medicago truncatula]	AT2G43850.1_Integrin-linked protein kinase family	IPR002110_Ankyrin repeat; IPR036770_Ankyrin repeat-containing domain superfamily; IPR011009_Protein kinase-like domain superfamily; IPR001245_Serine-threonine/tyrosine-protein kinase, catalytic domain	55.1333	30.1967	29.8633	35.01	59.95	56.62	48.83	25.15	37.12	28.32	30.8	31.76	27.03	37.95	38.93	28.15
Am_Tr_000431	278	XP_004504620.1_SWR1 complex subunit 2 [Cicer arietinum]	AT2G36740.1_DNA binding protein SWC2, GeneName=SWC2	.	0	0.76	0.826667	0	0	0	0	0	2.28	0	0	0	2.48	0	0	0
Am_Tr_000432	249	.	.	.	0	2.11	0	0	0	0	0	6.33	0	0	0	0	0	0	0	0
Am_Tr_000433	429	XP_004504620.1_SWR1 complex subunit 2 [Cicer arietinum]	AT2G36740.1_DNA binding protein SWC2, GeneName=SWC2	.	0.126667	2.23667	1.3	1.04333	0	0	0.38	2.19	3.35	1.17	1.12	0.42	2.36	0.45	0.46	2.22
Am_Tr_000434	236	XP_004504620.1_SWR1 complex subunit 2 [Cicer arietinum]	AT2G36740.1_DNA binding protein SWC2, GeneName=SWC2	.	0	0.78	0	0	0	0	0	0	0	2.34	0	0	0	0	0	0
Am_Tr_000435	2121	XP_014509299.1_3-oxoacyl-[acyl-carrier-protein] synthase II, chloroplastic [Vigna radiata var. radiata] XP_017430546.1 PREDICTED: 3-oxoacyl-[acyl-carrier-protein] synthase II, chloroplastic [Vigna angularis] XP_017430547.1 PREDICTED: 3-oxoacyl-[acyl-carrier-protein] synthase II, chloroplastic [Vigna angularis] BAT76905.1 hypothetical protein VIGAN_01497100 [Vigna angularis var. angularis] KAG2407…	AT1G74960.2_fatty acid biosynthesis 1, GeneName=FAB1	IPR014030_Beta-ketoacyl synthase, N-terminal; IPR016039_Thiolase-like; IPR017568_3-oxoacyl-[acyl-carrier-protein] synthase 2; IPR014031_Beta-ketoacyl synthase, C-terminal; IPR020841_Polyketide synthase, beta-ketoacyl synthase domain	2.42333	4.48333	7.06	8.34	1.22	5	1.05	3.41	5.99	4.05	7.41	7.37	6.4	9.03	8.98	7.01
Am_Tr_000436	2306	RZB71974.1_3-oxoacyl-[acyl-carrier-protein] synthase II, chloroplastic isoform B [Glycine soja]	AT1G74960.2_fatty acid biosynthesis 1, GeneName=FAB1	IPR014031_Beta-ketoacyl synthase, C-terminal; IPR016039_Thiolase-like; IPR014030_Beta-ketoacyl synthase, N-terminal; IPR020841_Polyketide synthase, beta-ketoacyl synthase domain	0	0.196667	0.0666667	0.136667	0	0	0	0.19	0.4	0	0	0.2	0	0	0.2	0.21
Am_Tr_000437	2918	KAH1216396.1_3-oxoacyl-[acyl-carrier-protein] synthase II, chloroplastic [Glycine max]	AT1G74960.2_fatty acid biosynthesis 1, GeneName=FAB1	IPR016039_Thiolase-like; IPR020841_Polyketide synthase, beta-ketoacyl synthase domain; IPR014031_Beta-ketoacyl synthase, C-terminal; IPR014030_Beta-ketoacyl synthase, N-terminal	8.1	1.1	0.323333	1.09667	10.27	6.92	7.11	1.67	1.11	0.52	0.26	0.27	0.44	0.57	1.25	1.47
Am_Tr_000438	637	XP_028945148.1_3-oxoacyl-[acyl-carrier-protein] synthase II, chloroplastic-like isoform X2 [Malus domestica]	AT1G74960.2_fatty acid biosynthesis 1, GeneName=FAB1	.	0	0.126667	0.743333	0.736667	0	0	0	0.38	0	0	1.65	0.58	0	2.21	0	0
Am_Tr_000439	2967	XP_004488123.1_3-oxoacyl-[acyl-carrier-protein] synthase II, chloroplastic-like [Cicer arietinum]	AT1G74960.2_fatty acid biosynthesis 1, GeneName=FAB1	IPR016039_Thiolase-like; IPR017568_3-oxoacyl-[acyl-carrier-protein] synthase 2; IPR014031_Beta-ketoacyl synthase, C-terminal; IPR014030_Beta-ketoacyl synthase, N-terminal; IPR020841_Polyketide synthase, beta-ketoacyl synthase domain	157.723	88.0533	57.0867	91.8867	146.24	171.97	154.96	89.55	85.02	89.59	36.45	70.12	64.69	89.22	88.87	97.57
Am_Tr_000440	2887	XP_004488123.1_3-oxoacyl-[acyl-carrier-protein] synthase II, chloroplastic-like [Cicer arietinum]	AT1G74960.2_fatty acid biosynthesis 1, GeneName=FAB1	IPR014030_Beta-ketoacyl synthase, N-terminal; IPR016039_Thiolase-like	21.95	0.25	0.286667	0.993333	19.89	7.82	38.14	0	0.75	0	0	0.59	0.27	0.75	1.66	0.57
Am_Tr_000441	2143	XP_004488123.1_3-oxoacyl-[acyl-carrier-protein] synthase II, chloroplastic-like [Cicer arietinum]	AT1G74960.2_fatty acid biosynthesis 1, GeneName=FAB1	IPR014030_Beta-ketoacyl synthase, N-terminal; IPR016039_Thiolase-like	0.376667	0.133333	0.336667	0.136667	0.29	0.38	0.46	0	0.29	0.11	0.07	0.4	0.54	0.14	0	0.27
Am_Tr_000442	2652	XP_014509299.1_3-oxoacyl-[acyl-carrier-protein] synthase II, chloroplastic [Vigna radiata var. radiata] XP_017430546.1 PREDICTED: 3-oxoacyl-[acyl-carrier-protein] synthase II, chloroplastic [Vigna angularis] XP_017430547.1 PREDICTED: 3-oxoacyl-[acyl-carrier-protein] synthase II, chloroplastic [Vigna angularis] BAT76905.1 hypothetical protein VIGAN_01497100 [Vigna angularis var. angularis] KAG2407…	AT1G74960.2_fatty acid biosynthesis 1, GeneName=FAB1	IPR017568_3-oxoacyl-[acyl-carrier-protein] synthase 2; IPR014030_Beta-ketoacyl synthase, N-terminal; IPR020841_Polyketide synthase, beta-ketoacyl synthase domain; IPR014031_Beta-ketoacyl synthase, C-terminal; IPR016039_Thiolase-like	0	0.0833333	0.286667	0	0	0	0	0.12	0.13	0	0.11	0.35	0.4	0	0	0
Am_Tr_000443	605	POE84256.1_3-oxoacyl-[acyl-carrier-protein] synthase ii, chloroplastic [Quercus suber]	AT1G74960.2_fatty acid biosynthesis 1, GeneName=FAB1	IPR016039_Thiolase-like; IPR014030_Beta-ketoacyl synthase, N-terminal	0	0	0.176667	0.146667	0	0	0	0	0	0	0.53	0	0	0.44	0	0
Am_Tr_000444	2795	KYP52903.1_hypothetical protein KK1_025103 [Cajanus cajan]	.	.	0	0	0.53	0	0	0	0	0	0	0	0.43	0.17	0.99	0	0	0
Am_Tr_000445	2257	KYP52903.1_hypothetical protein KK1_025103 [Cajanus cajan]	.	.	0	0	1.31333	0	0	0	0	0	0	0	0	3.02	0.92	0	0	0
Am_Tr_000446	4947	MQL41468.1_beta-ketoacyl-[acyl-carrier-protein] synthase II [Escherichia coli]	AT1G74960.2_fatty acid biosynthesis 1, GeneName=FAB1	.	0.133333	0.306667	4.93	0.113333	0.11	0.11	0.18	0.21	0.33	0.38	1.21	7.8	5.78	0.08	0.17	0.09
Am_Tr_000447	457	.	AT1G74960.2_fatty acid biosynthesis 1, GeneName=FAB1	.	0	0	1.01333	0.493333	0	0	0	0	0	0	1.65	0.7	0.69	1.08	0.4	0
Am_Tr_000448	371	.	.	.	0.213333	0	0	0.203333	0	0.64	0	0	0	0	0	0	0	0.61	0	0
Am_Tr_000449	1807	GAU45868.1_hypothetical protein TSUD_187010 [Trifolium subterraneum]	AT1G23800.1_aldehyde dehydrogenase 2B7, GeneName=ALDH2B7	IPR015590_Aldehyde dehydrogenase domain; IPR016161_Aldehyde/histidinol dehydrogenase	2.29333	0.903333	0.793333	3.30333	0.49	1.02	5.37	0.72	0	1.99	0.77	1.61	0	3.23	4.02	2.66
Am_Tr_000450	2837	GAU45868.1_hypothetical protein TSUD_187010 [Trifolium subterraneum]	AT1G23800.1_aldehyde dehydrogenase 2B7, GeneName=ALDH2B7	IPR015590_Aldehyde dehydrogenase domain; IPR016161_Aldehyde/histidinol dehydrogenase	0.96	0.0933333	0	0	2.1	0.78	0	0.28	0	0	0	0	0	0	0	0
Am_Tr_000451	2751	GAU45868.1_hypothetical protein TSUD_187010 [Trifolium subterraneum]	AT1G23800.2_aldehyde dehydrogenase 2B7, GeneName=ALDH2B7	IPR015590_Aldehyde dehydrogenase domain; IPR016161_Aldehyde/histidinol dehydrogenase	0.203333	0.0266667	0	0	0	0.61	0	0	0	0.08	0	0	0	0	0	0
Am_Tr_000452	976	KAG4377512.1_hypothetical protein GLYMA_18G137300v4 [Glycine max] KAH1154423.1 hypothetical protein GYH30_049915 [Glycine max]	AT1G23800.1_aldehyde dehydrogenase 2B7, GeneName=ALDH2B7	IPR015590_Aldehyde dehydrogenase domain; IPR016161_Aldehyde/histidinol dehydrogenase	1.54333	1.44333	1.11333	0.63	0.38	1.84	2.41	1.64	0.83	1.86	3.05	0	0.29	0.64	0.51	0.74
Am_Tr_000453	1716	GAU45868.1_hypothetical protein TSUD_187010 [Trifolium subterraneum]	AT1G23800.1_aldehyde dehydrogenase 2B7, GeneName=ALDH2B7	IPR015590_Aldehyde dehydrogenase domain; IPR016161_Aldehyde/histidinol dehydrogenase	198.297	86.7233	33.81	57.11	161.4	121.02	312.47	86.51	65.86	107.8	19.82	37.92	43.69	44.51	52.27	74.55
Am_Tr_000454	890	RDX77127.1_Aldehyde dehydrogenase family 2 member B4, mitochondrial [Mucuna pruriens]	AT1G23800.1_aldehyde dehydrogenase 2B7, GeneName=ALDH2B7	IPR015590_Aldehyde dehydrogenase domain; IPR016161_Aldehyde/histidinol dehydrogenase	353.09	160.237	71.13	113	260.85	203.86	594.56	154.92	125.37	200.42	75.96	65.05	72.38	113.81	97.11	128.08
Am_Tr_000455	2960	MCH82728.1_aldehyde dehydrogenase family 2 member B7 mitochondrial-like [Trifolium medium]	AT1G23800.2_aldehyde dehydrogenase 2B7, GeneName=ALDH2B7	IPR015590_Aldehyde dehydrogenase domain; IPR016161_Aldehyde/histidinol dehydrogenase	1.52	0.446667	0.27	0.496667	1.39	0	3.17	0.26	0.55	0.53	0.1	0.23	0.48	0.87	0.19	0.43
Am_Tr_000456	1281	GAU19656.1_hypothetical protein TSUD_185720 [Trifolium subterraneum]	AT1G23800.2_aldehyde dehydrogenase 2B7, GeneName=ALDH2B7	IPR015590_Aldehyde dehydrogenase domain; IPR016161_Aldehyde/histidinol dehydrogenase	0.0266667	1.16667	0.623333	0.673333	0	0	0.08	1.75	1.38	0.37	0.26	0.91	0.7	0.26	0.99	0.77
Am_Tr_000457	2394	XP_045787833.1_aldehyde dehydrogenase family 2 member B4, mitochondrial-like [Trifolium pratense] XP_045787834.1 aldehyde dehydrogenase family 2 member B4, mitochondrial-like [Trifolium pratense]	AT3G48000.1_aldehyde dehydrogenase 2B4, GeneName=ALDH2B4	IPR015590_Aldehyde dehydrogenase domain; IPR016161_Aldehyde/histidinol dehydrogenase	0.126667	0	0.863333	0.376667	0	0	0.38	0	0	0	1.85	0.74	0	0.31	0.48	0.34
Am_Tr_000458	1621	RDX73897.1_Aldehyde dehydrogenase family 2 member B4, mitochondrial, partial [Mucuna pruriens]	AT1G23800.2_aldehyde dehydrogenase 2B7, GeneName=ALDH2B7	.	0.453333	0.496667	0.44	0.0666667	0	1.23	0.13	0	0.98	0.51	0.34	0	0.98	0	0	0.2
Am_Tr_000459	2153	XP_045787833.1_aldehyde dehydrogenase family 2 member B4, mitochondrial-like [Trifolium pratense] XP_045787834.1 aldehyde dehydrogenase family 2 member B4, mitochondrial-like [Trifolium pratense]	AT3G48000.1_aldehyde dehydrogenase 2B4, GeneName=ALDH2B4	IPR015590_Aldehyde dehydrogenase domain; IPR016161_Aldehyde/histidinol dehydrogenase	0.51	1.29667	0.606667	0.2	0.9	0.44	0.19	1.65	1.26	0.98	0	0	1.82	0.17	0	0.43
Am_Tr_000460	2232	XP_045787833.1_aldehyde dehydrogenase family 2 member B4, mitochondrial-like [Trifolium pratense] XP_045787834.1 aldehyde dehydrogenase family 2 member B4, mitochondrial-like [Trifolium pratense]	AT3G48000.1_aldehyde dehydrogenase 2B4, GeneName=ALDH2B4	IPR016161_Aldehyde/histidinol dehydrogenase; IPR015590_Aldehyde dehydrogenase domain	0.236667	1.23333	0.616667	0.33	0.4	0	0.31	1.56	1.46	0.68	0.22	0.37	1.26	0	0	0.99
Am_Tr_000461	1052	RDX73897.1_Aldehyde dehydrogenase family 2 member B4, mitochondrial, partial [Mucuna pruriens]	AT1G23800.2_aldehyde dehydrogenase 2B7, GeneName=ALDH2B7	IPR015590_Aldehyde dehydrogenase domain; IPR016161_Aldehyde/histidinol dehydrogenase	0.52	4.73667	3.41	3.5	1.21	0	0.35	6.8	4.01	3.4	2.64	3.7	3.89	1.52	3.18	5.8
Am_Tr_000462	1991	XP_045787833.1_aldehyde dehydrogenase family 2 member B4, mitochondrial-like [Trifolium pratense] XP_045787834.1 aldehyde dehydrogenase family 2 member B4, mitochondrial-like [Trifolium pratense]	AT3G48000.1_aldehyde dehydrogenase 2B4, GeneName=ALDH2B4	IPR015590_Aldehyde dehydrogenase domain; IPR016161_Aldehyde/histidinol dehydrogenase	31.1167	143.253	223.937	109.437	27.1	42.56	23.69	207.97	108.64	113.15	219	207.78	245.03	87.17	104.08	137.06
Am_Tr_000463	1304	RDX73897.1_Aldehyde dehydrogenase family 2 member B4, mitochondrial, partial [Mucuna pruriens]	AT1G23800.2_aldehyde dehydrogenase 2B7, GeneName=ALDH2B7	.	0.213333	0.31	0.04	0	0.33	0	0.31	0.93	0	0	0.12	0	0	0	0	0
Am_Tr_000464	1352	KOM52532.1_hypothetical protein LR48_Vigan09g119100 [Vigna angularis]	AT1G23800.1_aldehyde dehydrogenase 2B7, GeneName=ALDH2B7	.	11.7833	4.98	2.85	4.45333	9.46	7.65	18.24	5.22	4.16	5.56	4.55	2.31	1.69	5.4	4.4	3.56
Am_Tr_000465	1631	BBG97486.1_hypothetical protein Prudu_006629 [Prunus dulcis]	AT1G23800.1_aldehyde dehydrogenase 2B7, GeneName=ALDH2B7	.	0.09	0.423333	0.396667	0	0	0	0.27	0.34	0	0.93	0.59	0	0.6	0	0	0
Am_Tr_000466	564	.	AT3G48000.1_aldehyde dehydrogenase 2B4, GeneName=ALDH2B4	.	0	0	0.0866667	0.0933333	0	0	0	0	0	0	0	0.26	0	0	0.28	0
Am_Tr_000467	2275	TKY56892.1_Sorting and assembly machinery component 50-like [Spatholobus suberectus]	AT5G05520.1_Outer membrane OMP85 family protein	IPR000184_Bacterial surface antigen (D15)	0	0.823333	1.29	0.5	0	0	0	0	1.8	0.67	0.86	2.69	0.32	0.38	0.47	0.65
Am_Tr_000468	1643	XP_019437565.1_PREDICTED: sorting and assembly machinery component 50 homolog isoform X2 [Lupinus angustifolius]	AT5G05520.1_Outer membrane OMP85 family protein	IPR000184_Bacterial surface antigen (D15)	0	0.07	0.12	0.0833333	0	0	0	0	0.11	0.1	0	0.36	0	0.14	0	0.11
Am_Tr_000469	3411	XP_004500508.1_sorting and assembly machinery component 50 homolog B-like [Cicer arietinum]	AT3G11070.1_Outer membrane OMP85 family protein	IPR010827_POTRA domain, BamA/TamA-like; IPR000184_Bacterial surface antigen (D15)	0.17	0.0766667	0.09	0.0733333	0.22	0	0.29	0.23	0	0	0.27	0	0	0.22	0	0
Am_Tr_000470	2944	XP_004500508.1_sorting and assembly machinery component 50 homolog B-like [Cicer arietinum]	AT3G11070.1_Outer membrane OMP85 family protein	IPR010827_POTRA domain, BamA/TamA-like; IPR000184_Bacterial surface antigen (D15)	5.41667	4.71	8.59333	6.50333	4.87	5.38	6	3.33	5.07	5.73	8.06	9.87	7.85	6.33	4.98	8.2
Am_Tr_000471	1592	XP_004500508.1_sorting and assembly machinery component 50 homolog B-like [Cicer arietinum]	AT5G05520.1_Outer membrane OMP85 family protein	IPR010827_POTRA domain, BamA/TamA-like	0.136667	0.36	0.24	0.276667	0.33	0	0.08	0.29	0.69	0.1	0	0.53	0.19	0.1	0.31	0.42
Am_Tr_000472	1739	TKY56892.1_Sorting and assembly machinery component 50-like [Spatholobus suberectus]	AT5G05520.1_Outer membrane OMP85 family protein	IPR000184_Bacterial surface antigen (D15)	0.123333	0.76	0.36	0.296667	0	0.37	0	1.1	1.07	0.11	0.18	0.38	0.52	0	0.76	0.13
Am_Tr_000473	2165	TKY56892.1_Sorting and assembly machinery component 50-like [Spatholobus suberectus]	AT5G05520.1_Outer membrane OMP85 family protein	IPR000184_Bacterial surface antigen (D15)	0	0	0.306667	0.743333	0	0	0	0	0	0	0	0.36	0.56	0.25	1.15	0.83
Am_Tr_000474	2412	TKY56892.1_Sorting and assembly machinery component 50-like [Spatholobus suberectus]	AT5G05520.1_Outer membrane OMP85 family protein	IPR000184_Bacterial surface antigen (D15)	6.21667	11.1833	11.38	13.3733	3.3	10.12	5.23	10.11	13.15	10.29	9.81	13.68	10.65	12.7	12.83	14.59
Am_Tr_000475	2318	TKY56892.1_Sorting and assembly machinery component 50-like [Spatholobus suberectus]	AT5G05520.1_Outer membrane OMP85 family protein	IPR000184_Bacterial surface antigen (D15)	1.14	1.68333	1.42667	0.94	0.69	2.1	0.63	1.06	1.62	2.37	0.54	1.41	2.33	0.81	0	2.01
Am_Tr_000476	2620	TKY56892.1_Sorting and assembly machinery component 50-like [Spatholobus suberectus]	AT5G05520.1_Outer membrane OMP85 family protein	IPR000184_Bacterial surface antigen (D15)	0.28	0.446667	0.573333	0.156667	0	0.46	0.38	0.54	0.31	0.49	0.39	0.59	0.74	0	0.32	0.15
Am_Tr_000477	3713	XP_004500508.1_sorting and assembly machinery component 50 homolog B-like [Cicer arietinum]	AT5G05520.1_Outer membrane OMP85 family protein	IPR000184_Bacterial surface antigen (D15); IPR010827_POTRA domain, BamA/TamA-like	0.163333	0.136667	0.08	0.0866667	0.1	0.26	0.13	0.08	0.26	0.07	0.08	0.09	0.07	0	0.26	0
Am_Tr_000478	2093	XP_004500508.1_sorting and assembly machinery component 50 homolog B-like [Cicer arietinum]	AT5G05520.1_Outer membrane OMP85 family protein	IPR010827_POTRA domain, BamA/TamA-like	0	0	0	0	0	0	0	0	0	0	0	0	0	0	0	0
Am_Tr_000479	6549	XP_004494504.1_pentatricopeptide repeat-containing protein At3g49170, chloroplastic-like [Cicer arietinum]	AT3G49170.1_Tetratricopeptide repeat (TPR)-like superfamily protein, GeneName=EMB2261	IPR011990_Tetratricopeptide-like helical domain superfamily; IPR032867_DYW domain; IPR002885_Pentatricopeptide repeat	0.756667	0.186667	0.256667	0.51	0.2	0.94	1.13	0	0.03	0.53	0.17	0	0.6	1.53	0	0
Am_Tr_000480	1578	BAU00568.1_hypothetical protein VIGAN_10217500, partial [Vigna angularis var. angularis] BAU00577.1 hypothetical protein VIGAN_10218500, partial [Vigna angularis var. angularis] BAU03601.1 hypothetical protein VIGAN_UM140300, partial [Vigna angularis var. angularis]	AT3G22690.3_LOW protein: PPR containing-like protein	.	0	0	0	0	0	0	0	0	0	0	0	0	0	0	0	0
Am_Tr_000481	6238	XP_004494504.1_pentatricopeptide repeat-containing protein At3g49170, chloroplastic-like [Cicer arietinum]	AT3G49170.1_Tetratricopeptide repeat (TPR)-like superfamily protein, GeneName=EMB2261	IPR011990_Tetratricopeptide-like helical domain superfamily; IPR032867_DYW domain; IPR002885_Pentatricopeptide repeat	2.77	5.55333	4.44	5.10667	4.51	2.33	1.47	5.02	6.72	4.92	4.02	4.06	5.24	4.83	5.52	4.97
Am_Tr_000482	6642	XP_004494504.1_pentatricopeptide repeat-containing protein At3g49170, chloroplastic-like [Cicer arietinum]	AT3G49170.1_Tetratricopeptide repeat (TPR)-like superfamily protein, GeneName=EMB2261	IPR011990_Tetratricopeptide-like helical domain superfamily; IPR032867_DYW domain; IPR002885_Pentatricopeptide repeat	0.0766667	0.35	0.266667	0.336667	0	0	0.23	0	1.05	0	0	0.6	0.2	0.5	0.16	0.35
Am_Tr_000483	5997	XP_004494504.1_pentatricopeptide repeat-containing protein At3g49170, chloroplastic-like [Cicer arietinum]	AT3G49170.1_Tetratricopeptide repeat (TPR)-like superfamily protein, GeneName=EMB2261	IPR011990_Tetratricopeptide-like helical domain superfamily; IPR032867_DYW domain; IPR002885_Pentatricopeptide repeat	5.38667	0.78	0.683333	1.69	11.17	2.74	2.25	0.56	0.42	1.36	0	1.26	0.79	0.76	2.96	1.35
Am_Tr_000484	6355	XP_004494504.1_pentatricopeptide repeat-containing protein At3g49170, chloroplastic-like [Cicer arietinum]	AT3G49170.1_Tetratricopeptide repeat (TPR)-like superfamily protein, GeneName=EMB2261	IPR011990_Tetratricopeptide-like helical domain superfamily; IPR032867_DYW domain; IPR002885_Pentatricopeptide repeat	0.923333	5.27667	2.36667	2.64667	0	2.77	0	6.11	4.76	4.96	3.45	3.44	0.21	2.44	2.54	2.96
Am_Tr_000485	6455	XP_004494504.1_pentatricopeptide repeat-containing protein At3g49170, chloroplastic-like [Cicer arietinum]	AT3G49170.1_Tetratricopeptide repeat (TPR)-like superfamily protein, GeneName=EMB2261	IPR011990_Tetratricopeptide-like helical domain superfamily; IPR032867_DYW domain; IPR002885_Pentatricopeptide repeat	0.136667	0.213333	0.32	0.223333	0.24	0	0.17	0.39	0	0.25	0	0	0.96	0.29	0.38	0
Am_Tr_000486	1546	BAU00568.1_hypothetical protein VIGAN_10217500, partial [Vigna angularis var. angularis] BAU00577.1 hypothetical protein VIGAN_10218500, partial [Vigna angularis var. angularis] BAU03601.1 hypothetical protein VIGAN_UM140300, partial [Vigna angularis var. angularis]	.	IPR002885_Pentatricopeptide repeat	1.15667	4.14	2.79333	4.22333	1.02	1.81	0.64	2.79	4.97	4.66	1.26	3.94	3.18	3.89	5.16	3.62
Am_Tr_000487	2287	XP_003591254.1_transcription factor PIF3 [Medicago truncatula] XP_024638901.1 transcription factor PIF3 [Medicago truncatula] AES61505.1 phytochrome-interacting factor 3.1 [Medicago truncatula] RHN80908.1 putative transcription factor bHLH family [Medicago truncatula]	AT1G09530.1_phytochrome interacting factor 3, GeneName=PIF3	IPR011598_Myc-type, basic helix-loop-helix (bHLH) domain; IPR036638_Helix-loop-helix DNA-binding domain superfamily	4.74	2.65333	2.17667	4.12667	3.88	7.58	2.76	2.42	2.02	3.52	1.27	3.06	2.2	3.42	4.12	4.84
Am_Tr_000488	2329	XP_012574162.1_pentatricopeptide repeat-containing protein At4g38010 [Cicer arietinum] XP_027192634.1 pentatricopeptide repeat-containing protein At4g38010 [Cicer arietinum]	AT4G38010.1_Pentatricopeptide repeat (PPR-like) superfamily protein	IPR002885_Pentatricopeptide repeat	0.43	1.83333	1.27333	3.32667	0.5	0.64	0.15	1.8	1.68	2.02	0.76	1.37	1.69	3.63	3.29	3.06
Am_Tr_000489	1442	.	.	.	0.14	0.183333	0.13	0.68	0.1	0.32	0	0	0.36	0.19	0.12	0.11	0.16	0.55	0.7	0.79
Am_Tr_000490	2894	.	.	.	0.716667	2.69	1.63333	4.23667	0.43	1.55	0.17	1.58	3.06	3.43	0.78	2	2.12	3.05	4.55	5.11
Am_Tr_000491	1537	.	.	.	0	0	0.146667	0.11	0	0	0	0	0	0	0	0.23	0.21	0.11	0.22	0
Am_Tr_000492	892	.	.	.	0.266667	1.81	2.94333	5.47667	0.41	0.27	0.12	0.45	3.52	1.46	1.43	3.86	3.54	4.41	3.75	8.27
Am_Tr_000493	1106	PNX81075.1_hypothetical protein L195_g037090 [Trifolium pratense] PNX81194.1 hypothetical protein L195_g037211 [Trifolium pratense] PNY03386.1 hypothetical protein L195_g026713 [Trifolium pratense]	AT5G17280.1_oxidoreductase-like protein, amino-terminal protein	IPR019180_Oxidoreductase-like, N-terminal	25.5667	11.1367	21.8767	13.6767	27.88	23.9	24.92	11.38	10.64	11.39	25.42	20.94	19.27	13.88	13.64	13.51
Am_Tr_000494	649	.	.	.	0.276667	1.00667	0	0.443333	0	0.83	0	0	3.02	0	0	0	0	0	1.02	0.31
Am_Tr_000495	1120	.	.	.	1.51667	6.79667	3.72333	5.87667	1.82	1.18	1.55	8.02	4.86	7.51	1.86	3.5	5.81	5.06	4.27	8.3
Am_Tr_000496	1338	AFK35926.1_unknown [Medicago truncatula]	AT4G20110.1_VACUOLAR SORTING RECEPTOR 7, GeneName=VSR7	.	0.0466667	3.26333	0.47	0.47	0	0	0.14	5.57	4.22	0	1.41	0	0	0.63	0.61	0.17
Am_Tr_000497	721	.	.	.	0	0.913333	1.12	0.92	0	0	0	0	2.74	0	0	3.36	0	0	2.76	0
Am_Tr_000498	1696	XP_004487890.1_vacuolar-sorting receptor 6 [Cicer arietinum]	AT4G20110.1_VACUOLAR SORTING RECEPTOR 7, GeneName=VSR7	IPR003137_PA domain	0	0	0	0.0866667	0	0	0	0	0	0	0	0	0	0	0.26	0
Am_Tr_000499	1515	AFK35926.1_unknown [Medicago truncatula]	AT4G20110.1_VACUOLAR SORTING RECEPTOR 7, GeneName=VSR7	.	0	7.54	1.95667	0.286667	0	0	0	11.53	11.09	0	2.72	3.15	0	0.86	0	0
Am_Tr_000500	758	.	.	.	0.376667	1.53333	1.57	0.746667	0	1.13	0	0	4.6	0	0.29	4.22	0.2	0	1.78	0.46
Am_Tr_000501	1604	XP_004487890.1_vacuolar-sorting receptor 6 [Cicer arietinum]	AT1G30900.1_VACUOLAR SORTING RECEPTOR 6, GeneName=VSR6	IPR003137_PA domain	175.79	127.177	22.9167	59.8233	183.68	175.46	168.23	106.89	149.87	124.77	6.45	26.98	35.32	63.36	65.57	50.54
Am_Tr_000502	534	.	.	.	0	0.136667	0.316667	0.276667	0	0	0	0	0.41	0	0	0	0.95	0.36	0.47	0
Am_Tr_000503	686	.	.	.	0	0.92	0.383333	0.303333	0	0	0	0	2.05	0.71	0.68	0	0.47	0	0.91	0
Am_Tr_000504	1423	AFK35926.1_unknown [Medicago truncatula]	AT4G20110.1_VACUOLAR SORTING RECEPTOR 7, GeneName=VSR7	.	0	10.57	1.99	0	0	0	0	17.75	13.96	0	0.74	5.23	0	0	0	0
Am_Tr_000505	1568	AFK39810.1_unknown [Lotus japonicus] AFK44073.1 unknown [Lotus japonicus]	AT1G79040.1_photosystem II subunit R, GeneName=PSBR	.	0	9.77333	3.00333	1.91	0	0	0	8.14	7.91	13.27	1.76	3.75	3.5	0.51	2.32	2.9
Am_Tr_000506	1123	AFK39810.1_unknown [Lotus japonicus] AFK44073.1 unknown [Lotus japonicus]	AT1G79040.1_photosystem II subunit R, GeneName=PSBR	.	0.106667	6.38667	1.71	0.933333	0	0.32	0	3.5	11.41	4.25	0.81	2.89	1.43	0.22	1.94	0.64
Am_Tr_000507	429	XP_027340402.1_photosystem II 10 kDa polypeptide, chloroplastic [Abrus precatorius]	AT1G79040.1_photosystem II subunit R, GeneName=PSBR	.	0.09	8.46667	1.80333	0.74	0	0.27	0	3.33	9.85	12.22	0.54	2.6	2.27	2.22	0	0
Am_Tr_000508	1546	AFK39810.1_unknown [Lotus japonicus] AFK44073.1 unknown [Lotus japonicus]	AT1G79040.1_photosystem II subunit R, GeneName=PSBR	.	0	1.88333	0.66	0.393333	0	0	0	2.91	0	2.74	1.4	0	0.58	1.09	0	0.09
Am_Tr_000509	1859	PNX78490.1_hypothetical protein L195_g034468, partial [Trifolium pratense]	AT1G79040.1_photosystem II subunit R, GeneName=PSBR	.	0	4.66667	0.616667	0.453333	0	0	0	4.21	9.79	0	0.36	1.48	0.01	0	1.19	0.17
Am_Tr_000510	987	AFK39810.1_unknown [Lotus japonicus] AFK44073.1 unknown [Lotus japonicus]	AT1G79040.1_photosystem II subunit R, GeneName=PSBR	IPR006814_Photosystem II PsbR	0	1.07333	0.683333	0.25	0	0	0	1.14	0.16	1.92	0.8	0.13	1.12	0.27	0.14	0.34
Am_Tr_000511	806	KAA0873338.1_hypothetical protein EYC94_25995, partial [Enterobacter hormaechei]	AT1G79040.1_photosystem II subunit R, GeneName=PSBR	IPR006814_Photosystem II PsbR	5.87	6418.85	1459.14	1066.77	0	17.34	0.27	7915.04	5254.5	6087	1578.78	1382.69	1415.96	1321.38	1097.75	781.17
Am_Tr_000512	727	KAA0873338.1_hypothetical protein EYC94_25995, partial [Enterobacter hormaechei]	AT1G79040.1_photosystem II subunit R, GeneName=PSBR	.	0.25	36.0333	20.32	6.13667	0	0.75	0	34.89	31.94	41.27	29.91	10.6	20.45	2.28	8.84	7.29
Am_Tr_000513	1837	PNX78490.1_hypothetical protein L195_g034468, partial [Trifolium pratense]	AT1G79040.1_photosystem II subunit R, GeneName=PSBR	.	0	1.40333	0.656667	0.386667	0	0	0	0.87	0	3.34	0.03	0	1.94	0	0	1.16
Am_Tr_000514	4953	GAU46782.1_hypothetical protein TSUD_351810 [Trifolium subterraneum]	AT4G23160.3_cysteine-rich RECEPTOR-like kinase, GeneName=CRK8	IPR029472_Retrotransposon Copia-like, N-terminal; IPR005162_Retrotransposon gag domain	2.04	4.84667	0.79	2.92	0.53	0.96	4.63	3.55	4.83	6.16	0	1.47	0.9	2.69	2.38	3.69
Am_Tr_000515	3875	GAU46782.1_hypothetical protein TSUD_351810 [Trifolium subterraneum]	AT4G23160.3_cysteine-rich RECEPTOR-like kinase, GeneName=CRK8	IPR005162_Retrotransposon gag domain; IPR029472_Retrotransposon Copia-like, N-terminal	1.45	2.89	1.61667	1.65	0.75	1.96	1.64	2.89	2.66	3.12	0.76	2.05	2.04	1.82	1.57	1.56
Am_Tr_000516	5261	GAU46782.1_hypothetical protein TSUD_351810 [Trifolium subterraneum]	AT4G23160.3_cysteine-rich RECEPTOR-like kinase, GeneName=CRK8	IPR005162_Retrotransposon gag domain; IPR029472_Retrotransposon Copia-like, N-terminal; IPR025724_GAG-pre-integrase domain	12.7633	15.5267	2.97	6.94	0.93	13.5	23.86	6.29	22.25	18.04	0	5.06	3.85	2.95	10.56	7.31
Am_Tr_000517	5288	GAU46782.1_hypothetical protein TSUD_351810 [Trifolium subterraneum]	AT4G23160.3_cysteine-rich RECEPTOR-like kinase, GeneName=CRK8	IPR005162_Retrotransposon gag domain; IPR029472_Retrotransposon Copia-like, N-terminal; IPR025724_GAG-pre-integrase domain	0.93	2.68333	0.9	3.08	2.79	0	0	8.05	0	0	2.7	0	0	9.24	0	0
Am_Tr_000518	4980	GAU46782.1_hypothetical protein TSUD_351810 [Trifolium subterraneum]	AT4G23160.3_cysteine-rich RECEPTOR-like kinase, GeneName=CRK8	IPR029472_Retrotransposon Copia-like, N-terminal; IPR005162_Retrotransposon gag domain	0.573333	1.58	0	2.18333	1.72	0	0	4.74	0	0	0	0	0	6.55	0	0
Am_Tr_000519	2143	MCH83148.1_retrovirus-related Pol polyprotein from transposon TNT 1-94 [Trifolium medium]	AT4G23160.3_cysteine-rich RECEPTOR-like kinase, GeneName=CRK8	.	0.58	1.79333	1.03667	1.20333	0	1.22	0.52	1.41	2.91	1.06	1.12	1.99	0	0.69	0.48	2.44
Am_Tr_000520	2197	MCH83148.1_retrovirus-related Pol polyprotein from transposon TNT 1-94 [Trifolium medium]	AT4G23160.3_cysteine-rich RECEPTOR-like kinase, GeneName=CRK8	.	1.50667	2.17	1.18333	0.95	2.19	0.91	1.42	1.91	1.83	2.77	0	0.99	2.56	0.95	1.9	0
Am_Tr_000521	2673	XP_004500232.1_uncharacterized protein LOC101514797 isoform X1 [Cicer arietinum]	AT3G47000.1_Glycosyl hydrolase family protein	IPR002772_Glycoside hydrolase family 3 C-terminal domain; IPR036881_Glycoside hydrolase family 3 C-terminal domain superfamily; IPR017853_Glycoside hydrolase superfamily	0.0866667	0.283333	0.183333	0.556667	0.26	0	0	0.85	0	0	0.33	0	0.22	1.67	0	0
Am_Tr_000522	2463	XP_004500232.1_uncharacterized protein LOC101514797 isoform X1 [Cicer arietinum]	AT3G47000.1_Glycosyl hydrolase family protein	IPR001764_Glycoside hydrolase, family 3, N-terminal; IPR017853_Glycoside hydrolase superfamily; IPR002772_Glycoside hydrolase family 3 C-terminal domain; IPR036881_Glycoside hydrolase family 3 C-terminal domain superfamily	10.6067	25.0733	22.3867	46.8867	6.32	19.38	6.12	22.8	27.42	25	18.4	23.07	25.69	49.52	45.55	45.59
Am_Tr_000523	2539	XP_004500232.1_uncharacterized protein LOC101514797 isoform X1 [Cicer arietinum]	AT3G47000.3_Glycosyl hydrolase family protein	IPR001764_Glycoside hydrolase, family 3, N-terminal; IPR017853_Glycoside hydrolase superfamily	0.936667	2.21	0.72	0.806667	0.27	0.69	1.85	2.92	1.76	1.95	0	0.5	1.66	0.92	1.5	0
Am_Tr_000524	2597	XP_027190850.1_uncharacterized protein LOC101514797 isoform X3 [Cicer arietinum] XP_027190852.1 uncharacterized protein LOC101514797 isoform X3 [Cicer arietinum] XP_027190853.1 uncharacterized protein LOC101514797 isoform X3 [Cicer arietinum]	AT3G47000.2_Glycosyl hydrolase family protein	IPR002772_Glycoside hydrolase family 3 C-terminal domain; IPR036881_Glycoside hydrolase family 3 C-terminal domain superfamily; IPR017853_Glycoside hydrolase superfamily	0.13	0.216667	0	0.0833333	0	0.23	0.16	0.65	0	0	0	0	0	0	0.25	0
Am_Tr_000525	748	XP_045816873.1_beta-glucosidase BoGH3B-like [Trifolium pratense]	AT5G20950.1_Glycosyl hydrolase family protein	IPR001764_Glycoside hydrolase, family 3, N-terminal; IPR017853_Glycoside hydrolase superfamily	3.98	5.71	10.6733	7.18333	1.1	4.93	5.91	5.6	7.93	3.6	5.67	11.76	14.59	2.88	5.51	13.16
Am_Tr_000526	634	XP_045816873.1_beta-glucosidase BoGH3B-like [Trifolium pratense]	AT5G20950.1_Glycosyl hydrolase family protein	IPR001764_Glycoside hydrolase, family 3, N-terminal; IPR017853_Glycoside hydrolase superfamily	0	0.32	58.7033	0.16	0	0	0	0	0.54	0.42	122.45	34.83	18.83	0	0.24	0.24
Am_Tr_000527	1054	.	.	.	0.41	1.57	2.05333	1.65667	0.69	0.35	0.19	0.44	3.27	1	0.67	4.32	1.17	0.8	1.99	2.18
Am_Tr_000528	1187	.	.	.	0.75	0.983333	1.37333	1.22667	0.67	0.83	0.75	1.05	0.95	0.95	0.66	2.4	1.06	1.08	1.82	0.78
Am_Tr_000529	750	.	.	.	0.713333	0.683333	0.476667	0.383333	0.68	0.38	1.08	1.02	0.79	0.24	0.92	0.51	0	0.36	0.37	0.42
Am_Tr_000530	371	.	.	.	0.343333	0.73	2.44	0.553333	0	1.03	0	0.6	1.54	0.05	1.96	3.02	2.34	0	0	1.66
Am_Tr_000531	372	.	.	.	0.75	0.486667	1.08667	0	1.59	0	0.66	0.73	0	0.73	0	0	3.26	0	0	0
Am_Tr_000532	364	.	.	.	0.296667	0.72	1.49	0	0.61	0	0.28	0	0	2.16	1.89	2.58	0	0	0	0
Am_Tr_000533	896	.	.	.	2.47667	3.11667	2.07	2.80667	3.01	3.56	0.86	3.83	3.41	2.11	0.29	4.23	1.69	1.55	4.75	2.12
Am_Tr_000534	251	KAG4995227.1_hypothetical protein JHK86_032054 [Glycine max] KAG5125220.1 hypothetical protein JHK82_031957 [Glycine max] KAG5146645.1 hypothetical protein JHK84_032188 [Glycine max]	.	.	0	0	0	0	0	0	0	0	0	0	0	0	0	0	0	0
Am_Tr_000535	251	.	.	.	0	0	0.633333	0	0	0	0	0	0	0	0	0	1.9	0	0	0
Am_Tr_000536	836	KAE9609356.1_putative shikimate O-hydroxycinnamoyltransferase [Lupinus albus] KAF1871260.1 hypothetical protein Lal_00020052 [Lupinus albus]	AT5G42830.1_HXXXD-type acyl-transferase family protein	.	0	0.266667	11.4867	0.256667	0	0	0	0.15	0.51	0.14	16.84	0.31	17.31	0.46	0	0.31
Am_Tr_000537	4801	PNX92571.1_histone deacetylase [Trifolium pratense]	AT4G23160.3_cysteine-rich RECEPTOR-like kinase, GeneName=CRK8	IPR043502_DNA/RNA polymerase superfamily; IPR013103_Reverse transcriptase, RNA-dependent DNA polymerase	2.41667	2.22333	1.38333	2.34	1.78	2.94	2.53	1.86	2.46	2.35	0.8	1.38	1.97	1.71	2.58	2.73
Am_Tr_000538	799	XP_020219488.1_uncharacterized protein LOC109802504 [Cajanus cajan]	AT4G21105.3_cytochrome-c oxidase/ electron carrier	.	24.6433	82.4367	33.7167	93.5433	37.64	22.97	13.32	106.27	64.35	76.69	29.34	32.29	39.52	104.15	94.47	82.01
Am_Tr_000539	1122	.	.	.	0.18	0.546667	0.286667	0.503333	0.11	0.43	0	0.41	0.58	0.65	0.09	0.5	0.27	0.32	0.76	0.43
Am_Tr_000540	4301	QHO00044.1_uncharacterized protein DS421_13g403050 [Arachis hypogaea]	.	.	0.22	0.296667	0.11	0	0.14	0.52	0	0.02	0.79	0.08	0.33	0	0	0	0	0
Am_Tr_000541	4332	QHO00044.1_uncharacterized protein DS421_13g403050 [Arachis hypogaea]	.	.	0.18	0	0.346667	1.38333	0	0	0.54	0	0	0	0	0.53	0.51	0.51	2.21	1.43
Am_Tr_000542	551	.	.	.	0.08	0.19	0.43	0.456667	0	0	0.24	0	0.32	0.25	0.48	0.81	0	0.53	0.29	0.55
Am_Tr_000543	364	.	.	.	0.406667	0	0	0.0433333	0.66	0	0.56	0	0	0	0	0	0	0.08	0	0.05
Am_Tr_000544	313	.	.	.	0.333333	0.273333	0.853333	0.623333	0	1	0	0	0	0.82	0	0	2.56	1.87	0	0
Am_Tr_000545	207	.	.	.	0	0	0	0	0	0	0	0	0	0	0	0	0	0	0	0
Am_Tr_000546	1829	XP_003526254.1_GDSL esterase/lipase At1g29670 [Glycine max] XP_028237017.1 GDSL esterase/lipase At1g29670-like [Glycine soja] KHN07786.1 GDSL esterase/lipase [Glycine soja] KRH55870.1 hypothetical protein GLYMA_06G287400v4 [Glycine max] RZC09595.1 GDSL esterase/lipase [Glycine soja]	AT5G45670.1_GDSL-like Lipase/Acylhydrolase superfamily protein	IPR001087_GDSL lipase/esterase	0	0	10.17	0	0	0	0	0	0	0	23.24	5.03	2.24	0	0	0
Am_Tr_000547	1484	XP_003526254.1_GDSL esterase/lipase At1g29670 [Glycine max] XP_028237017.1 GDSL esterase/lipase At1g29670-like [Glycine soja] KHN07786.1 GDSL esterase/lipase [Glycine soja] KRH55870.1 hypothetical protein GLYMA_06G287400v4 [Glycine max] RZC09595.1 GDSL esterase/lipase [Glycine soja]	AT5G45670.1_GDSL-like Lipase/Acylhydrolase superfamily protein	IPR001087_GDSL lipase/esterase	0	0	7.13667	0	0	0	0	0	0	0	15.01	4.24	2.16	0	0	0
Am_Tr_000548	1450	XP_003526254.1_GDSL esterase/lipase At1g29670 [Glycine max] XP_028237017.1 GDSL esterase/lipase At1g29670-like [Glycine soja] KHN07786.1 GDSL esterase/lipase [Glycine soja] KRH55870.1 hypothetical protein GLYMA_06G287400v4 [Glycine max] RZC09595.1 GDSL esterase/lipase [Glycine soja]	AT5G45670.1_GDSL-like Lipase/Acylhydrolase superfamily protein	IPR001087_GDSL lipase/esterase	0	0.0833333	14.22	0	0	0	0	0.08	0.17	0	33.91	5.05	3.7	0	0	0
Am_Tr_000549	1411	XP_012568212.1_GDSL esterase/lipase At1g29670-like isoform X1 [Cicer arietinum]	AT1G29660.1_GDSL-like Lipase/Acylhydrolase superfamily protein	IPR001087_GDSL lipase/esterase	0	1.59667	28.4567	0.163333	0	0	0	0	4.65	0.14	19.74	33.84	31.79	0	0.25	0.24
Am_Tr_000550	1784	GAU39193.1_hypothetical protein TSUD_270370 [Trifolium subterraneum]	AT4G15180.1_SET domain protein 2, GeneName=SDG2	IPR045606_Protein SET DOMAIN GROUP 2, C-terminal	10.4933	14.8267	12.3133	11.9767	7.75	8.13	15.6	13.64	14.16	16.68	17.98	10.77	8.19	13.52	11.51	10.9
Am_Tr_000551	10471	XP_004513544.1_histone-lysine N-methyltransferase ATXR3-like [Cicer arietinum]	AT4G15180.1_SET domain protein 2, GeneName=SDG2	IPR036047_F-box-like domain superfamily	4.34	6.00667	2.80667	4.64333	5.54	5.11	2.37	5.98	6.23	5.81	1.55	3.34	3.53	3.28	3.65	7
Am_Tr_000552	10296	XP_004487363.1_histone-lysine N-methyltransferase ATXR3-like [Cicer arietinum]	AT4G15180.1_SET domain protein 2, GeneName=SDG2	IPR036047_F-box-like domain superfamily	0	0	0	0	0	0	0	0	0	0	0	0	0	0	0	0
Am_Tr_000553	10687	XP_004513544.1_histone-lysine N-methyltransferase ATXR3-like [Cicer arietinum]	AT4G15180.1_SET domain protein 2, GeneName=SDG2	IPR001214_SET domain; IPR036047_F-box-like domain superfamily	0.973333	4.91333	1.61	3.25667	1.55	0.65	0.72	6.36	5.11	3.27	0.76	2	2.07	2.73	4.12	2.92
Am_Tr_000554	10210	XP_004487363.1_histone-lysine N-methyltransferase ATXR3-like [Cicer arietinum]	AT4G15180.1_SET domain protein 2, GeneName=SDG2	IPR001214_SET domain; IPR036047_F-box-like domain superfamily	0.283333	0	0	0.0466667	0.07	0.15	0.63	0	0	0	0	0	0	0.14	0	0
Am_Tr_000555	10397	XP_004487363.1_histone-lysine N-methyltransferase ATXR3-like [Cicer arietinum]	AT4G15180.1_SET domain protein 2, GeneName=SDG2	IPR036047_F-box-like domain superfamily	0	0	0	0	0	0	0	0	0	0	0	0	0	0	0	0
Am_Tr_000556	7381	XP_004487363.1_histone-lysine N-methyltransferase ATXR3-like [Cicer arietinum]	AT4G15180.1_SET domain protein 2, GeneName=SDG2	IPR036047_F-box-like domain superfamily; IPR001214_SET domain; IPR045606_Protein SET DOMAIN GROUP 2, C-terminal	14.0667	18.8367	10.3967	14.09	11.51	13.81	16.88	18.17	21.73	16.61	3.19	14.63	13.37	10.22	14.47	17.58
Am_Tr_000557	10586	XP_004513544.1_histone-lysine N-methyltransferase ATXR3-like [Cicer arietinum]	AT4G15180.1_SET domain protein 2, GeneName=SDG2	IPR001214_SET domain; IPR036047_F-box-like domain superfamily	0.286667	0	0	0.04	0.09	0.05	0.72	0	0	0	0	0	0	0.12	0	0
Am_Tr_000558	7757	TKY66939.1_Histone-lysine N-methyltransferase ATXR3 [Spatholobus suberectus]	AT4G15180.1_SET domain protein 2, GeneName=SDG2	IPR001214_SET domain; IPR045606_Protein SET DOMAIN GROUP 2, C-terminal; IPR036047_F-box-like domain superfamily	2.56333	5.11333	3.53	4.75	2.53	3.84	1.32	3.65	6.15	5.54	0.61	5.25	4.73	3	6.12	5.13
Am_Tr_000559	726	KYP44294.1_putative histone-lysine N-methyltransferase ATXR3 [Cajanus cajan]	AT4G15180.1_SET domain protein 2, GeneName=SDG2	IPR045606_Protein SET DOMAIN GROUP 2, C-terminal	9.38	10.8333	6.39	10.22	6.71	5.73	15.7	11.1	10.89	10.51	9.27	4.49	5.41	14.01	8.01	8.64
Am_Tr_000560	10773	XP_004513544.1_histone-lysine N-methyltransferase ATXR3-like [Cicer arietinum]	AT4G15180.1_SET domain protein 2, GeneName=SDG2	IPR036047_F-box-like domain superfamily	0	0	0	0	0	0	0	0	0	0	0	0	0	0	0	0
Am_Tr_000561	1702	XP_003539881.1_uncharacterized protein LOC100787042 [Glycine max] XP_028193803.1 uncharacterized protein LOC114379360 [Glycine soja] KAG4967625.1 hypothetical protein JHK87_033276 [Glycine soja] KAG4980099.1 hypothetical protein JHK85_034057 [Glycine max] KAG4985732.1 hypothetical protein JHK86_033423 [Glycine max] KAG5118918.1 hypothetical protein JHK82_033338 [Glycine max] KAG5139911.1 hypothet…	AT2G32280.1_GPI inositol-deacylase C, putative (DUF1218)	IPR009606_Modifying wall lignin-1/2	0.483333	0.536667	0.78	1.98667	0.27	0.77	0.41	0	0.58	1.03	1.8	0.37	0.17	2.21	1.06	2.69
Am_Tr_000562	10311	XP_004487363.1_histone-lysine N-methyltransferase ATXR3-like [Cicer arietinum]	AT4G15180.1_SET domain protein 2, GeneName=SDG2	IPR001214_SET domain; IPR036047_F-box-like domain superfamily	1.35	3.74333	1.91333	2.72667	1.27	2.17	0.61	2.39	3.42	5.42	1.58	2.01	2.15	3.55	2.78	1.85
Am_Tr_000563	1964	PNY12006.1_4-hydroxyphenylpyruvate dioxygenase-like protein [Trifolium pratense]	AT1G06570.1_4-hydroxyphenylpyruvate dioxygenase, GeneName=PDS1	IPR005956_4-hydroxyphenylpyruvate dioxygenase; IPR029068_Glyoxalase/Bleomycin resistance protein/Dihydroxybiphenyl dioxygenase; IPR004360_Glyoxalase/fosfomycin resistance/dioxygenase domain	126.913	162.25	345.397	36.46	74.87	40.98	264.89	184.04	119.07	183.64	139.84	522.15	374.2	37.86	37.13	34.39
Am_Tr_000564	2723	PNY12006.1_4-hydroxyphenylpyruvate dioxygenase-like protein [Trifolium pratense]	AT1G06570.1_4-hydroxyphenylpyruvate dioxygenase, GeneName=PDS1	IPR004360_Glyoxalase/fosfomycin resistance/dioxygenase domain; IPR005956_4-hydroxyphenylpyruvate dioxygenase; IPR029068_Glyoxalase/Bleomycin resistance protein/Dihydroxybiphenyl dioxygenase	1.64667	6.03	10.3267	0.803333	1.32	1.12	2.5	8.2	4.53	5.36	5.38	13.06	12.54	0.93	0.69	0.79
Am_Tr_000565	230	MCH90162.1_histone-lysine N-methyltransferase ATXR3-like [Trifolium medium]	.	.	0	0	0.99	0	0	0	0	0	0	0	0	2.97	0	0	0	0
Am_Tr_000566	360	.	.	.	1.12667	2.02333	1.08667	5.12333	3.38	0	0	6.07	0	0	3.26	0	0	15.12	0	0.25
Am_Tr_000567	488	MCH90162.1_histone-lysine N-methyltransferase ATXR3-like [Trifolium medium]	AT4G15180.1_SET domain protein 2, GeneName=SDG2	.	0.196667	0.676667	0.223333	0.38	0	0	0.59	0.58	1.45	0	0	0.33	0.34	0	1.14	0
Am_Tr_000568	2888	XP_027342707.1_transcription factor GTE4 isoform X3 [Abrus precatorius] XP_027342709.1 transcription factor GTE4 isoform X3 [Abrus precatorius]	AT1G06230.4_global transcription factor group E4, GeneName=GTE4	IPR001487_Bromodomain; IPR036427_Bromodomain-like superfamily; IPR027353_NET domain	0.85	1.13	1.27	0.18	0.3	2.2	0.05	0	1.91	1.48	0.35	2.92	0.54	0	0	0.54
Am_Tr_000569	1634	GAU22560.1_hypothetical protein TSUD_93280 [Trifolium subterraneum]	.	.	10.77	12.5767	6.86	11.1667	16.73	9.58	6	11.41	15.76	10.56	2.2	9.54	8.84	5.26	14.92	13.32
Am_Tr_000570	3059	XP_027342707.1_transcription factor GTE4 isoform X3 [Abrus precatorius] XP_027342709.1 transcription factor GTE4 isoform X3 [Abrus precatorius]	AT1G06230.4_global transcription factor group E4, GeneName=GTE4	IPR001487_Bromodomain; IPR036427_Bromodomain-like superfamily; IPR027353_NET domain	8.53667	15.53	8.43667	12.0267	10.63	8.05	6.93	19.21	13.36	14.02	5.15	8.67	11.49	12.75	12.9	10.43
Am_Tr_000571	6371	XP_027342707.1_transcription factor GTE4 isoform X3 [Abrus precatorius] XP_027342709.1 transcription factor GTE4 isoform X3 [Abrus precatorius]	AT1G06230.4_global transcription factor group E4, GeneName=GTE4	IPR001487_Bromodomain; IPR036427_Bromodomain-like superfamily; IPR027353_NET domain	0	0	0	0.5	0	0	0	0	0	0	0	0	0	0.91	0.59	0
Am_Tr_000572	3536	XP_004505512.1_transcription factor GTE4-like [Cicer arietinum] XP_012572642.1 transcription factor GTE4-like [Cicer arietinum] XP_012572643.1 transcription factor GTE4-like [Cicer arietinum]	AT1G06230.4_global transcription factor group E4, GeneName=GTE4	IPR027353_NET domain; IPR001487_Bromodomain; IPR036427_Bromodomain-like superfamily	0.0766667	0.25	0.396667	0.613333	0	0	0.23	0.24	0.29	0.22	0.44	0.27	0.48	0.2	0.46	1.18
Am_Tr_000573	6292	XP_027342707.1_transcription factor GTE4 isoform X3 [Abrus precatorius] XP_027342709.1 transcription factor GTE4 isoform X3 [Abrus precatorius]	AT1G06230.4_global transcription factor group E4, GeneName=GTE4	IPR001487_Bromodomain; IPR036427_Bromodomain-like superfamily; IPR027353_NET domain	0.306667	1.79333	0.25	0	0.11	0.48	0.33	1.99	1.78	1.61	0.43	0.17	0.15	0	0	0
Am_Tr_000574	3445	XP_004505512.1_transcription factor GTE4-like [Cicer arietinum] XP_012572642.1 transcription factor GTE4-like [Cicer arietinum] XP_012572643.1 transcription factor GTE4-like [Cicer arietinum]	AT1G06230.4_global transcription factor group E4, GeneName=GTE4	IPR001487_Bromodomain; IPR027353_NET domain; IPR036427_Bromodomain-like superfamily	26.3367	27.2933	15.6233	22.3167	41.5	20.35	17.16	28.28	27.56	26.04	10.56	18.89	17.42	17	27.39	22.56
Am_Tr_000575	6000	XP_027342707.1_transcription factor GTE4 isoform X3 [Abrus precatorius] XP_027342709.1 transcription factor GTE4 isoform X3 [Abrus precatorius]	AT1G06230.4_global transcription factor group E4, GeneName=GTE4	IPR001487_Bromodomain; IPR036427_Bromodomain-like superfamily; IPR027353_NET domain	0.376667	1.83667	0.766667	0.32	0.42	0	0.71	2.4	1.89	1.22	0.33	1.4	0.57	0.43	0	0.53
Am_Tr_000576	1010	.	.	.	0.68	1.41667	1.27333	1.55333	0.43	1.06	0.55	1.27	1.06	1.92	1.87	1.24	0.71	1.78	1.12	1.76
Am_Tr_000577	3490	XP_027367470.1_uncharacterized protein LOC113873520 isoform X1 [Abrus precatorius] XP_027367471.1 uncharacterized protein LOC113873520 isoform X1 [Abrus precatorius] XP_027367472.1 uncharacterized protein LOC113873520 isoform X1 [Abrus precatorius]	AT4G13550.3_putative triglyceride lipase	IPR000008_C2 domain; IPR035892_C2 domain superfamily; IPR029058_Alpha/Beta hydrolase fold	0.29	10.2	3.48	4.03667	0	0.79	0.08	9.24	7.83	13.53	3.14	3.14	4.16	2.43	4.59	5.09
Am_Tr_000578	3401	XP_027367470.1_uncharacterized protein LOC113873520 isoform X1 [Abrus precatorius] XP_027367471.1 uncharacterized protein LOC113873520 isoform X1 [Abrus precatorius] XP_027367472.1 uncharacterized protein LOC113873520 isoform X1 [Abrus precatorius]	AT4G13550.1_putative triglyceride lipase	IPR029058_Alpha/Beta hydrolase fold; IPR002921_Fungal lipase-like domain	0.556667	14.8767	4.45333	5.89667	0.12	1.39	0.16	16.42	11.5	16.71	3.83	5.46	4.07	7.25	5.22	5.22
Am_Tr_000579	4057	XP_004497240.1_myosin-1 [Cicer arietinum]	AT3G19960.1_myosin 1, GeneName=ATM1	IPR001609_Myosin head, motor domain; IPR000048_IQ motif, EF-hand binding site; IPR027417_P-loop containing nucleoside triphosphate hydrolase	1.53333	26.41	14.6167	4.96667	0.91	3.29	0.4	36.19	25.75	17.29	11.2	16.44	16.21	6	5.44	3.46
Am_Tr_000580	4718	XP_045820456.1_myosin-1-like [Trifolium pratense] XP_045820464.1 myosin-1-like [Trifolium pratense]	AT3G19960.1_myosin 1, GeneName=ATM1	IPR000048_IQ motif, EF-hand binding site; IPR001609_Myosin head, motor domain; IPR027417_P-loop containing nucleoside triphosphate hydrolase	15.9133	12.5533	19.9667	17.63	13.13	21.39	13.22	13.31	14.42	9.93	15.55	25.86	18.49	19.06	20.02	13.81
Am_Tr_000581	4558	XP_004497240.1_myosin-1 [Cicer arietinum]	AT3G19960.1_myosin 1, GeneName=ATM1	IPR000048_IQ motif, EF-hand binding site; IPR001609_Myosin head, motor domain; IPR027417_P-loop containing nucleoside triphosphate hydrolase	0.0466667	0.706667	0.63	0.623333	0	0	0.14	0	0.22	1.9	1.72	0.17	0	0.92	0	0.95
Am_Tr_000582	4500	XP_027192671.1_myosin-2-like [Cicer arietinum]	AT5G54280.2_myosin 2, GeneName=ATM2	IPR000048_IQ motif, EF-hand binding site; IPR027417_P-loop containing nucleoside triphosphate hydrolase; IPR001609_Myosin head, motor domain	0.72	18.98	8.15	9.76333	0.63	1.3	0.23	20.01	19.32	17.61	6.36	9.54	8.55	10.1	8.77	10.42
Am_Tr_000583	4643	XP_004487658.1_myosin-2 [Cicer arietinum]	AT5G54280.2_myosin 2, GeneName=ATM2	IPR001609_Myosin head, motor domain; IPR000048_IQ motif, EF-hand binding site; IPR027417_P-loop containing nucleoside triphosphate hydrolase	3.31333	8.75667	11.3767	6.7	2.82	2.24	4.88	10.4	8.78	7.09	8.37	12.58	13.18	4.96	7.22	7.92
Am_Tr_000584	3975	KYP74490.1_Myosin-J heavy chain, partial [Cajanus cajan]	AT1G54560.2_Myosin family protein with Dil domain-containing protein, GeneName=XIE	IPR000048_IQ motif, EF-hand binding site; IPR001609_Myosin head, motor domain; IPR027417_P-loop containing nucleoside triphosphate hydrolase	0.376667	1.16667	1.22667	1.11	0.28	0.71	0.14	1.04	1.51	0.95	1.64	0.96	1.08	0.79	1.33	1.21
Am_Tr_000585	2992	XP_027365893.1_myosin-9-like isoform X2 [Abrus precatorius]	AT1G08730.1_Myosin family protein with Dil domain-containing protein, GeneName=XIC	IPR002710_Dilute domain; IPR000048_IQ motif, EF-hand binding site; IPR027417_P-loop containing nucleoside triphosphate hydrolase; IPR001609_Myosin head, motor domain	0.483333	0.806667	1.1	1.03333	0.8	0.53	0.12	0.7	0.86	0.86	1.07	1.15	1.08	0.96	0.61	1.53
Am_Tr_000586	2935	XP_045823114.1_probable methyltransferase PMT2 [Trifolium pratense]	AT1G26850.1_S-adenosyl-L-methionine-dependent methyltransferases superfamily protein	IPR004159_Putative S-adenosyl-L-methionine-dependent methyltransferase; IPR029063_S-adenosyl-L-methionine-dependent methyltransferase	0	0	0.143333	0.0366667	0	0	0	0	0	0	0.31	0	0.12	0	0	0.11
Am_Tr_000587	2537	XP_004511207.1_probable methyltransferase PMT2 [Cicer arietinum] XP_004511208.1 probable methyltransferase PMT2 [Cicer arietinum]	AT1G26850.1_S-adenosyl-L-methionine-dependent methyltransferases superfamily protein	IPR004159_Putative S-adenosyl-L-methionine-dependent methyltransferase; IPR029063_S-adenosyl-L-methionine-dependent methyltransferase	1.26	0.986667	1.74667	2.27667	0.3	2.79	0.69	0.15	1.76	1.05	0.75	2.29	2.2	1.73	2.35	2.75
Am_Tr_000588	2109	XP_003628357.1_probable methyltransferase PMT2 [Medicago truncatula] XP_024628158.1 probable methyltransferase PMT2 [Medicago truncatula] AET02833.1 methyltransferase PMT2-like protein [Medicago truncatula] RHN41045.1 putative S-adenosyl-L-methionine-dependent methyltransferase [Medicago truncatula]	AT1G26850.1_S-adenosyl-L-methionine-dependent methyltransferases superfamily protein	IPR004159_Putative S-adenosyl-L-methionine-dependent methyltransferase; IPR029063_S-adenosyl-L-methionine-dependent methyltransferase	46.8867	39.31	61.9033	57.8567	29.58	76.83	34.25	26.7	44.01	47.22	44.15	68.22	73.34	44.65	48.16	80.76
Am_Tr_000589	2434	XP_045823114.1_probable methyltransferase PMT2 [Trifolium pratense]	AT1G26850.1_S-adenosyl-L-methionine-dependent methyltransferases superfamily protein	IPR029063_S-adenosyl-L-methionine-dependent methyltransferase; IPR004159_Putative S-adenosyl-L-methionine-dependent methyltransferase	10.28	28.6833	26.86	22.92	2.96	17.1	10.78	31.44	29.39	25.22	20.08	30.58	29.92	23.72	22.18	22.86
Am_Tr_000590	1699	XP_045813549.1_probable methyltransferase PMT2 [Trifolium pratense]	AT1G26850.1_S-adenosyl-L-methionine-dependent methyltransferases superfamily protein	IPR004159_Putative S-adenosyl-L-methionine-dependent methyltransferase; IPR029063_S-adenosyl-L-methionine-dependent methyltransferase	38.1233	26.1633	44.9233	52.7733	36.54	48.68	29.15	14.28	34.98	29.23	50.26	46.68	37.83	43.28	56.88	58.16
Am_Tr_000591	358	.	.	.	27.13	25.6233	15.3667	22.42	37.1	30.57	13.72	12.5	36.12	28.25	1.26	27.78	17.06	9.93	37.34	19.99
Am_Tr_000592	2713	XP_029125647.1_probable methyltransferase PMT14 [Cajanus cajan]	AT4G18030.1_S-adenosyl-L-methionine-dependent methyltransferases superfamily protein	IPR029063_S-adenosyl-L-methionine-dependent methyltransferase; IPR004159_Putative S-adenosyl-L-methionine-dependent methyltransferase	3.47	18.57	30.3567	29.17	2.16	6.49	1.76	9.95	28.04	17.72	24.75	34.7	31.62	25.91	21.13	40.47
Am_Tr_000593	1117	KAG4941744.1_hypothetical protein JHK87_045615 [Glycine soja]	AT2G45750.1_S-adenosyl-L-methionine-dependent methyltransferases superfamily protein	IPR004159_Putative S-adenosyl-L-methionine-dependent methyltransferase; IPR029063_S-adenosyl-L-methionine-dependent methyltransferase	6.82333	0.44	0.116667	1.33667	4.62	11.27	4.58	0.39	0.6	0.33	0.21	0.14	0	1.59	1.11	1.31
Am_Tr_000594	2410	XP_045811705.1_probable methyltransferase PMT16 [Trifolium pratense]	AT2G45750.1_S-adenosyl-L-methionine-dependent methyltransferases superfamily protein	IPR004159_Putative S-adenosyl-L-methionine-dependent methyltransferase; IPR029063_S-adenosyl-L-methionine-dependent methyltransferase	0.663333	14.3833	6.05	15.41	0.27	1.4	0.32	13.61	14.83	14.71	5.59	5.74	6.82	15.65	6.24	24.34
Am_Tr_000595	991	MCI62946.1_hypothetical protein [Trifolium medium]	.	.	247.043	137.53	871.853	332.857	146.27	348.28	246.58	152.12	146.22	114.25	961.35	868.59	785.62	615.7	167.22	215.65
Am_Tr_000596	517	XP_027334542.1_probable methyltransferase PMT16 [Abrus precatorius]	AT4G00750.1_S-adenosyl-L-methionine-dependent methyltransferases superfamily protein	IPR004159_Putative S-adenosyl-L-methionine-dependent methyltransferase; IPR029063_S-adenosyl-L-methionine-dependent methyltransferase	0.106667	9.15667	2.29	3.28667	0.32	0	0	8.67	8.53	10.27	2.39	0.9	3.58	2.53	1.62	5.71
Am_Tr_000597	316	.	.	.	0	0	0	0.903333	0	0	0	0	0	0	0	0	0	0	0	2.71
Am_Tr_000598	495	GAU13050.1_hypothetical protein TSUD_173500 [Trifolium subterraneum]	AT3G52690.1_RNI-like superfamily protein	IPR006566_FBD domain	0.99	1.33667	1.39667	1.89	0.41	1.41	1.15	3.95	0.06	0	0.38	0	3.81	1.58	2.94	1.15
Am_Tr_000599	1432	XP_045793820.1_F-box/FBD/LRR-repeat protein At4g26340-like [Trifolium pratense]	AT3G54910.1_RNI-like superfamily protein	IPR006566_FBD domain	0	0.136667	0	0	0	0	0	0.41	0	0	0	0	0	0	0	0
Am_Tr_000600	1559	XP_045793820.1_F-box/FBD/LRR-repeat protein At4g26340-like [Trifolium pratense]	AT4G26340.1_F-box/RNI-like/FBD-like domains-containing protein	IPR006566_FBD domain; IPR001810_F-box domain; IPR036047_F-box-like domain superfamily	1.94333	3.33	2.38333	5.42	0.76	4.15	0.92	2.06	4.6	3.33	1.97	3.09	2.09	4.17	6.82	5.27
Am_Tr_000601	1509	XP_045793820.1_F-box/FBD/LRR-repeat protein At4g26340-like [Trifolium pratense]	AT3G54910.1_RNI-like superfamily protein	IPR006566_FBD domain	1.70667	0.46	1.11333	2.04333	2.09	1.77	1.26	0	0.83	0.55	1.26	0.98	1.1	1.46	1.92	2.75
Am_Tr_000602	1530	XP_045793820.1_F-box/FBD/LRR-repeat protein At4g26340-like [Trifolium pratense]	AT4G26340.1_F-box/RNI-like/FBD-like domains-containing protein	IPR001810_F-box domain; IPR036047_F-box-like domain superfamily	0.266667	1.02333	0.77	1.65333	0.8	0	0	1.54	1.27	0.26	0.39	1.18	0.74	0.39	2.18	2.39
Am_Tr_000603	745	GAU13050.1_hypothetical protein TSUD_173500 [Trifolium subterraneum]	AT3G18150.1_RNI-like superfamily protein	IPR006566_FBD domain	0.886667	0	0.566667	1.3	1.48	1.18	0	0	0	0	0	1.37	0.33	2.43	1.47	0
Am_Tr_000604	540	GAU13050.1_hypothetical protein TSUD_173500 [Trifolium subterraneum]	AT3G52690.1_RNI-like superfamily protein	IPR006566_FBD domain	0.786667	4.23333	4.90333	3.21667	2.36	0	0	2.06	5.22	5.42	5.34	7.54	1.83	2.76	2.58	4.31
Am_Tr_000605	258	GAU13050.1_hypothetical protein TSUD_173500 [Trifolium subterraneum]	AT5G56440.1_F-box/RNI-like/FBD-like domains-containing protein	.	2.59667	9.89333	1.71	4.66	3.84	3.95	0	9.08	15.43	5.17	0	1.75	3.38	10.3	3.68	0
Am_Tr_000606	282	RHN71099.1_putative FBD domain-containing protein [Medicago truncatula]	AT5G56440.1_F-box/RNI-like/FBD-like domains-containing protein	.	0	1.04	1.09333	4.36	0	0	0	0	0	3.12	3.28	0	0	6.69	0	6.39
Am_Tr_000607	1978	XP_004512278.1_amino acid transporter AVT3B-like [Cicer arietinum]	AT4G38250.1_Transmembrane amino acid transporter family protein	IPR013057_Amino acid transporter, transmembrane domain	21.6333	32.5667	21.8467	26.56	13.23	23.18	28.49	26.73	36.19	34.78	8.49	26.39	30.66	21.26	33.03	25.39
Am_Tr_000608	1900	XP_045807197.1_FBD-associated F-box protein At5g56370-like [Trifolium pratense]	.	.	0	0.02	0	0.243333	0	0	0	0	0.06	0	0	0	0	0.61	0.12	0
Am_Tr_000609	2020	XP_045807197.1_FBD-associated F-box protein At5g56370-like [Trifolium pratense]	.	.	2.26	2.55667	3.64667	2.58	4.13	0	2.65	2.88	0	4.79	6.34	0	4.6	3.2	0	4.54
Am_Tr_000610	1835	XP_045819046.1_uncharacterized protein LOC123911630 [Trifolium pratense] XP_045819047.1 uncharacterized protein LOC123911630 [Trifolium pratense]	AT1G13480.1_hypothetical protein (DUF1262)	IPR010683_Protein of unknown function DUF1262	132.677	8.12	22.3633	28.5267	25.02	70.7	302.31	6.19	7.76	10.41	2.72	29.33	35.04	39.85	18.64	27.09
Am_Tr_000611	942	.	.	.	1.91667	1.30667	1.89667	3.17667	1.24	3.82	0.69	1.14	1.13	1.65	1.58	3.08	1.03	3.45	3.06	3.02
Am_Tr_000612	1805	XP_045819046.1_uncharacterized protein LOC123911630 [Trifolium pratense] XP_045819047.1 uncharacterized protein LOC123911630 [Trifolium pratense]	AT1G13480.1_hypothetical protein (DUF1262)	IPR010683_Protein of unknown function DUF1262	4.27	1.50333	1.84333	3.51	12.81	0	0	4.51	0	0	5.53	0	0	10.53	0	0
Am_Tr_000613	1768	XP_004512278.1_amino acid transporter AVT3B-like [Cicer arietinum]	AT4G38250.1_Transmembrane amino acid transporter family protein	.	2.48333	2.46667	2.14333	2.35333	1.48	2.45	3.52	2.46	2.58	2.36	1.68	2.87	1.88	2.95	1.98	2.13
Am_Tr_000614	1094	XP_045793821.1_probable FBD-associated F-box protein At1g32375 [Trifolium pratense]	AT3G52680.2_F-box/RNI-like/FBD-like domains-containing protein	IPR036047_F-box-like domain superfamily	0.99	7.11333	6.19667	5.79667	1.55	0.44	0.98	5.93	8.63	6.78	2.82	8.14	7.63	4.8	5.69	6.9
Am_Tr_000615	609	TKY58477.1_hypothetical protein E2542_SST15539 [Spatholobus suberectus]	.	.	3.56667	1.59667	1.89	2.23667	0	10.7	0	0	4.79	0	0	5.67	0	0	6.71	0
Am_Tr_000616	1331	XP_040871812.1_cyclin-dependent kinase F-4 isoform X1 [Glycine max] XP_040871813.1 cyclin-dependent kinase F-4 isoform X1 [Glycine max] XP_040871814.1 cyclin-dependent kinase F-4 isoform X1 [Glycine max]	AT4G19110.1_Protein kinase superfamily protein	.	51.2467	31.29	24.35	37.3733	67.38	41.54	44.82	34.03	28.21	31.63	19.18	25.24	28.63	38.38	40.91	32.83
Am_Tr_000617	1308	XP_040871812.1_cyclin-dependent kinase F-4 isoform X1 [Glycine max] XP_040871813.1 cyclin-dependent kinase F-4 isoform X1 [Glycine max] XP_040871814.1 cyclin-dependent kinase F-4 isoform X1 [Glycine max]	AT4G19110.1_Protein kinase superfamily protein	.	7.29667	5.91667	3.45	3.34667	11.45	4.49	5.95	3.97	10.33	3.45	1.1	6.73	2.52	2.56	4.18	3.3
Am_Tr_000618	1356	XP_040871812.1_cyclin-dependent kinase F-4 isoform X1 [Glycine max] XP_040871813.1 cyclin-dependent kinase F-4 isoform X1 [Glycine max] XP_040871814.1 cyclin-dependent kinase F-4 isoform X1 [Glycine max]	AT4G19110.1_Protein kinase superfamily protein	.	0	1.17667	0	0	0	0	0	0	3.53	0	0	0	0	0	0	0
Am_Tr_000619	1400	XP_040871812.1_cyclin-dependent kinase F-4 isoform X1 [Glycine max] XP_040871813.1 cyclin-dependent kinase F-4 isoform X1 [Glycine max] XP_040871814.1 cyclin-dependent kinase F-4 isoform X1 [Glycine max]	AT4G19110.1_Protein kinase superfamily protein	.	15.4967	10.44	6.58	13.79	15.14	19.82	11.53	9.65	11.46	10.21	5.98	2.27	11.49	11.4	10.49	19.48
Am_Tr_000620	1425	XP_040871812.1_cyclin-dependent kinase F-4 isoform X1 [Glycine max] XP_040871813.1 cyclin-dependent kinase F-4 isoform X1 [Glycine max] XP_040871814.1 cyclin-dependent kinase F-4 isoform X1 [Glycine max]	AT4G19110.1_Protein kinase superfamily protein	.	2.35333	0	2.68667	1.38333	0	7.06	0	0	0	0	0	8.06	0	0	4.15	0
Am_Tr_000621	411	.	.	.	0.626667	0.29	0.553333	0	0	1.88	0	0	0.87	0	0	1.66	0	0	0	0
Am_Tr_000622	856	GAU13047.1_hypothetical protein TSUD_173470 [Trifolium subterraneum]	AT5G56800.1_Protein with RNI-like/FBD-like domain	.	0	0.286667	0.166667	0.18	0	0	0	0.26	0.6	0	0.5	0	0	0	0.25	0.29
Am_Tr_000623	762	KEH22195.1_F-box/RNI/FBD-like domain protein [Medicago truncatula]	AT5G56800.1_Protein with RNI-like/FBD-like domain	IPR006566_FBD domain	0.06	1.50667	2.28667	1.49333	0	0.18	0	1.06	1.62	1.84	1.76	3.15	1.95	1.58	0.96	1.94
Am_Tr_000624	645	.	.	.	0.0766667	0.14	0	0.223333	0	0.23	0	0.22	0	0.2	0	0	0	0	0	0.67
Am_Tr_000625	709	RYR54670.1_hypothetical protein Ahy_A06g029976 isoform E [Arachis hypogaea]	AT3G60190.1_DYNAMIN-like 1E, GeneName=DL1E	IPR045063_Dynamin, N-terminal; IPR027417_P-loop containing nucleoside triphosphate hydrolase; IPR000375_Dynamin stalk domain; IPR001401_Dynamin, GTPase domain	2.45333	31.0433	13.8767	18.65	1.58	4.34	1.44	30.04	36.18	26.91	8.59	16.52	16.52	17.53	17.58	20.84
Am_Tr_000626	2590	XP_027193087.1_probable ADP-ribosylation factor GTPase-activating protein AGD14 isoform X4 [Cicer arietinum]	AT4G13350.2_NSP (nuclear shuttle protein)-interacting GTPase, GeneName=NIG	IPR001164_Arf GTPase activating protein; IPR037278_ARFGAP/RecO-like zinc finger	0	0	0	0	0	0	0	0	0	0	0	0	0	0	0	0
Am_Tr_000627	2757	XP_027193087.1_probable ADP-ribosylation factor GTPase-activating protein AGD14 isoform X4 [Cicer arietinum]	AT4G13350.2_NSP (nuclear shuttle protein)-interacting GTPase, GeneName=NIG	IPR001164_Arf GTPase activating protein; IPR037278_ARFGAP/RecO-like zinc finger	0.08	0.486667	0.316667	0.946667	0	0	0.24	0.54	0.6	0.32	0	0.71	0.24	1.01	0.6	1.23
Am_Tr_000628	2682	XP_027193087.1_probable ADP-ribosylation factor GTPase-activating protein AGD14 isoform X4 [Cicer arietinum]	AT4G13350.2_NSP (nuclear shuttle protein)-interacting GTPase, GeneName=NIG	IPR001164_Arf GTPase activating protein; IPR037278_ARFGAP/RecO-like zinc finger	2.02	5.81	3.26	6.20667	3.05	1.56	1.45	5.96	8.19	3.28	3.62	3.8	2.36	9.26	6.41	2.95
Am_Tr_000629	2945	XP_027193087.1_probable ADP-ribosylation factor GTPase-activating protein AGD14 isoform X4 [Cicer arietinum]	AT4G13350.2_NSP (nuclear shuttle protein)-interacting GTPase, GeneName=NIG	IPR001164_Arf GTPase activating protein; IPR037278_ARFGAP/RecO-like zinc finger	1.56	2.88	1.95333	1.51333	1.28	2.99	0.41	3.75	3.31	1.58	1.69	2.45	1.72	1.74	1.82	0.98
Am_Tr_000630	2327	XP_027193087.1_probable ADP-ribosylation factor GTPase-activating protein AGD14 isoform X4 [Cicer arietinum]	AT4G13350.2_NSP (nuclear shuttle protein)-interacting GTPase, GeneName=NIG	IPR001164_Arf GTPase activating protein; IPR037278_ARFGAP/RecO-like zinc finger	19.6033	27.41	19.4367	17.4567	27.18	21.04	10.59	26.12	31.65	24.46	20.09	23.67	14.55	17.31	20.89	14.17
Am_Tr_000631	1333	XP_020223479.1_dynamin-related protein 1E [Cajanus cajan] KYP59210.1 Dynamin-related protein 1E [Cajanus cajan]	AT3G60190.1_DYNAMIN-like 1E, GeneName=DL1E	IPR000375_Dynamin stalk domain; IPR003130_Dynamin GTPase effector	1.92333	14.02	10.1333	10.3933	1.52	3.77	0.48	13.77	14.91	13.38	10.49	8.98	10.93	9.45	11.91	9.82
Am_Tr_000632	1562	XP_027188578.1_acyltransferase-like protein At3g26840, chloroplastic isoform X2 [Cicer arietinum]	AT5G41120.2_Esterase/lipase/thioesterase family protein	IPR007130_Diacylglycerol acyltransferase	9.15667	15.3933	1.61333	1.21667	13.99	3.76	9.72	19.42	11.42	15.34	2.46	0.39	1.99	1.65	0.33	1.67
Am_Tr_000633	6021	XP_027188578.1_acyltransferase-like protein At3g26840, chloroplastic isoform X2 [Cicer arietinum]	AT5G41120.2_Esterase/lipase/thioesterase family protein	IPR007021_Domain of unknown function DUF659	6.37	2.91	0.813333	0.49	6.97	3.34	8.8	3.14	0	5.59	1.49	0.2	0.75	1.4	0.07	0
Am_Tr_000634	1168	GAU42399.1_hypothetical protein TSUD_324540, partial [Trifolium subterraneum]	AT5G41130.1_Esterase/lipase/thioesterase family protein	IPR000073_Alpha/beta hydrolase fold-1; IPR029058_Alpha/Beta hydrolase fold; IPR007130_Diacylglycerol acyltransferase	0.966667	10.2067	6.49333	1.41	0.85	2.05	0	8.02	9.84	12.76	0.23	10.82	8.43	1.26	1.18	1.79
Am_Tr_000635	5830	XP_045795156.1_acyltransferase-like protein At3g26840, chloroplastic isoform X2 [Trifolium pratense]	AT5G41130.1_Esterase/lipase/thioesterase family protein	IPR000073_Alpha/beta hydrolase fold-1; IPR029058_Alpha/Beta hydrolase fold; IPR007130_Diacylglycerol acyltransferase	2.27	7.47333	3.51333	1.94	3.37	1.15	2.29	8.86	3.79	9.77	0.78	4.19	5.57	2.54	1.3	1.98
Am_Tr_000636	2102	XP_027188578.1_acyltransferase-like protein At3g26840, chloroplastic isoform X2 [Cicer arietinum]	AT5G41120.2_Esterase/lipase/thioesterase family protein	IPR007130_Diacylglycerol acyltransferase	5.7	21.3933	22.1567	4.70333	6.14	7.12	3.84	23.96	11.35	28.87	11.46	27.36	27.65	6.08	4.62	3.41
Am_Tr_000637	6298	XP_027350946.1_acyltransferase-like protein At3g26840, chloroplastic [Abrus precatorius] XP_027350947.1 acyltransferase-like protein At3g26840, chloroplastic [Abrus precatorius]	AT5G41130.1_Esterase/lipase/thioesterase family protein	IPR007021_Domain of unknown function DUF659	2.95667	3.19667	0	0.233333	3.34	0	5.53	3.82	4.19	1.58	0	0	0	0	0.2	0.5
Am_Tr_000638	6124	XP_045795156.1_acyltransferase-like protein At3g26840, chloroplastic isoform X2 [Trifolium pratense]	AT5G41130.1_Esterase/lipase/thioesterase family protein	IPR007021_Domain of unknown function DUF659	0	0.0233333	0	0	0	0	0	0.07	0	0	0	0	0	0	0	0
Am_Tr_000639	1402	AET01305.2_dynamin 1E-like protein [Medicago truncatula]	AT3G60190.1_DYNAMIN-like 1E, GeneName=DL1E	IPR003130_Dynamin GTPase effector; IPR000375_Dynamin stalk domain	156.717	65.99	49.88	67.2	148.73	142.44	178.98	59.94	66.41	71.62	44.7	51.85	53.09	81.2	61.2	59.2
Am_Tr_000640	1833	XP_045795157.1_acyltransferase-like protein At3g26840, chloroplastic isoform X3 [Trifolium pratense]	AT5G41120.2_Esterase/lipase/thioesterase family protein	IPR007130_Diacylglycerol acyltransferase	1.36667	5.55333	1.39333	0.95	1.76	1.41	0.93	8.63	0.11	7.92	0.91	1.24	2.03	1.61	0.01	1.23
Am_Tr_000641	1043	TKY60906.1_Arf-GAP domain and FG repeat-containing protein 1 [Spatholobus suberectus]	AT4G13350.2_NSP (nuclear shuttle protein)-interacting GTPase, GeneName=NIG	IPR001164_Arf GTPase activating protein; IPR037278_ARFGAP/RecO-like zinc finger	86.5033	17.92	16.73	22.5233	71.87	109.95	77.69	16.07	20.11	17.58	7.64	20.65	21.9	22.41	20.83	24.33
Am_Tr_000642	1152	TKY60906.1_Arf-GAP domain and FG repeat-containing protein 1 [Spatholobus suberectus]	AT4G13350.2_NSP (nuclear shuttle protein)-interacting GTPase, GeneName=NIG	IPR001164_Arf GTPase activating protein; IPR037278_ARFGAP/RecO-like zinc finger	12.4933	0.22	0.296667	0.243333	3.72	6.08	27.68	0	0	0.66	0	0.6	0.29	0.34	0	0.39
Am_Tr_000643	600	XP_020228458.1_uncharacterized protein LOC109809531 isoform X1 [Cajanus cajan] XP_020239678.1 uncharacterized protein LOC109818574 isoform X1 [Cajanus cajan]	AT5G33406.1_hAT dimerization domain-containing protein / transposase-like protein	.	0	0.966667	0.583333	0	0	0	0	0.94	0.83	1.13	0	1.75	0	0	0	0
Am_Tr_000644	635	XP_020228458.1_uncharacterized protein LOC109809531 isoform X1 [Cajanus cajan] XP_020239678.1 uncharacterized protein LOC109818574 isoform X1 [Cajanus cajan]	AT5G33406.1_hAT dimerization domain-containing protein / transposase-like protein	IPR012337_Ribonuclease H-like superfamily; IPR008906_HAT, C-terminal dimerisation domain	1.11	0.31	0.49	0.16	2.09	0	1.24	0	0	0.93	0	0.88	0.59	0.48	0	0
Am_Tr_000645	395	.	.	.	0.366667	0	0.31	0.483333	0	1.1	0	0	0	0	0	0.93	0	0	0.54	0.91
Am_Tr_000646	359	.	.	.	0.846667	0.55	1.39667	0.446667	0	1.38	1.16	0.89	0.76	0	0	1.26	2.93	0	1.34	0
Am_Tr_000647	614	XP_020228458.1_uncharacterized protein LOC109809531 isoform X1 [Cajanus cajan] XP_020239678.1 uncharacterized protein LOC109818574 isoform X1 [Cajanus cajan]	AT5G33406.1_hAT dimerization domain-containing protein / transposase-like protein	IPR008906_HAT, C-terminal dimerisation domain; IPR012337_Ribonuclease H-like superfamily	0	0.433333	0.453333	0.1	0	0	0	1.3	0	0	1.2	0.16	0	0	0	0.3
Am_Tr_000648	217	.	.	.	0	0	0	0	0	0	0	0	0	0	0	0	0	0	0	0
Am_Tr_000649	416	.	.	.	0	0.27	0	0.496667	0	0	0	0	0	0.81	0	0	0	1.49	0	0
Am_Tr_000650	576	XP_020239677.1_uncharacterized protein LOC109818573 [Cajanus cajan]	AT5G33406.1_hAT dimerization domain-containing protein / transposase-like protein	IPR008906_HAT, C-terminal dimerisation domain; IPR012337_Ribonuclease H-like superfamily	0.463333	0.22	0.166667	0.09	1.09	0	0.3	0	0	0.66	0	0.5	0	0	0.27	0
Am_Tr_000651	6606	XP_004490094.1_protein SHORT ROOT IN SALT MEDIUM 1 isoform X1 [Cicer arietinum]	AT2G03150.2_ATP/GTP-binding protein family, GeneName=emb1579	IPR025954_DBC1/CARP1 catalytically inactive NUDIX hydrolase domain	0.136667	1.36667	0.626667	0.413333	0	0	0.41	0.94	1.96	1.2	0.43	1.05	0.4	0.33	0	0.91
Am_Tr_000652	4365	XP_004490094.1_protein SHORT ROOT IN SALT MEDIUM 1 isoform X1 [Cicer arietinum]	AT2G03150.1_ATP/GTP-binding protein family, GeneName=emb1579	IPR045353_LAIKA domain; IPR011992_EF-hand domain pair	0	0	0	0	0	0	0	0	0	0	0	0	0	0	0	0
Am_Tr_000653	6603	XP_004490094.1_protein SHORT ROOT IN SALT MEDIUM 1 isoform X1 [Cicer arietinum]	AT2G03150.2_ATP/GTP-binding protein family, GeneName=emb1579	IPR025954_DBC1/CARP1 catalytically inactive NUDIX hydrolase domain; IPR045353_LAIKA domain	0.00666667	0.0133333	0.02	0.04	0.02	0	0	0.02	0	0.02	0	0	0.06	0	0.12	0
Am_Tr_000654	4036	XP_004490094.1_protein SHORT ROOT IN SALT MEDIUM 1 isoform X1 [Cicer arietinum]	AT2G03150.1_ATP/GTP-binding protein family, GeneName=emb1579	IPR045353_LAIKA domain; IPR025954_DBC1/CARP1 catalytically inactive NUDIX hydrolase domain; IPR011992_EF-hand domain pair	0.03	0.823333	0.72	0.38	0.07	0.02	0	1.66	0.81	0	0.58	0.72	0.86	0	0.62	0.52
Am_Tr_000655	6604	XP_004490094.1_protein SHORT ROOT IN SALT MEDIUM 1 isoform X1 [Cicer arietinum]	AT2G03150.1_ATP/GTP-binding protein family, GeneName=emb1579	IPR045353_LAIKA domain; IPR011992_EF-hand domain pair	0.113333	0.09	0.0666667	0.126667	0.26	0.08	0	0.24	0	0.03	0	0	0.2	0	0.38	0
Am_Tr_000656	2846	XP_012568287.1_protein SHORT ROOT IN SALT MEDIUM 1 isoform X2 [Cicer arietinum]	AT2G03150.1_ATP/GTP-binding protein family, GeneName=emb1579	IPR011992_EF-hand domain pair	0.783333	2.08667	7.44	1.55	0.74	0.68	0.93	2.64	2.9	0.72	17.5	2.71	2.11	2.87	0.71	1.07
Am_Tr_000657	4086	XP_004490094.1_protein SHORT ROOT IN SALT MEDIUM 1 isoform X1 [Cicer arietinum]	AT2G03150.1_ATP/GTP-binding protein family, GeneName=emb1579	IPR025954_DBC1/CARP1 catalytically inactive NUDIX hydrolase domain; IPR045354_BURAN domain	9.26667	9.76667	6.48667	11.0567	6.85	11.82	9.13	12.13	9.06	8.11	0	13.2	6.26	10.8	6.81	15.56
Am_Tr_000658	4098	XP_004490094.1_protein SHORT ROOT IN SALT MEDIUM 1 isoform X1 [Cicer arietinum]	AT2G03150.1_ATP/GTP-binding protein family, GeneName=emb1579	IPR025954_DBC1/CARP1 catalytically inactive NUDIX hydrolase domain; IPR045354_BURAN domain; IPR011992_EF-hand domain pair; IPR045353_LAIKA domain	0.193333	1.05	1.42667	1.18	0	0	0.58	0.26	1.23	1.66	0.34	1.71	2.23	0	2.1	1.44
Am_Tr_000659	4188	XP_004490094.1_protein SHORT ROOT IN SALT MEDIUM 1 isoform X1 [Cicer arietinum]	AT2G03150.1_ATP/GTP-binding protein family, GeneName=emb1579	IPR045353_LAIKA domain; IPR011992_EF-hand domain pair	2.95	7.13333	6.20333	6.84	2.5	1.94	4.41	8.92	6.58	5.9	7.53	3.95	7.13	6.2	8.95	5.37
Am_Tr_000660	4170	XP_004490094.1_protein SHORT ROOT IN SALT MEDIUM 1 isoform X1 [Cicer arietinum]	AT2G03150.1_ATP/GTP-binding protein family, GeneName=emb1579	IPR045353_LAIKA domain; IPR025954_DBC1/CARP1 catalytically inactive NUDIX hydrolase domain; IPR011992_EF-hand domain pair	26.1267	39.67	21.9267	33.63	31.52	22.6	24.26	38	39.57	41.44	11.85	25.66	28.27	30.19	32.66	38.04
Am_Tr_000661	6502	XP_004490094.1_protein SHORT ROOT IN SALT MEDIUM 1 isoform X1 [Cicer arietinum]	AT2G03150.1_ATP/GTP-binding protein family, GeneName=emb1579	IPR025954_DBC1/CARP1 catalytically inactive NUDIX hydrolase domain	0.24	0.19	0.08	0.0966667	0.53	0.19	0	0.53	0	0.04	0	0	0.24	0	0.28	0.01
Am_Tr_000662	4104	XP_004490094.1_protein SHORT ROOT IN SALT MEDIUM 1 isoform X1 [Cicer arietinum]	AT2G03150.1_ATP/GTP-binding protein family, GeneName=emb1579	IPR045353_LAIKA domain; IPR025954_DBC1/CARP1 catalytically inactive NUDIX hydrolase domain; IPR011992_EF-hand domain pair	9.94333	20.28	8.37667	10.5267	7.06	7.15	15.62	23.01	20.95	16.88	7.95	11.13	6.05	8.75	11.09	11.74
Am_Tr_000663	4390	XP_004490094.1_protein SHORT ROOT IN SALT MEDIUM 1 isoform X1 [Cicer arietinum]	AT2G03150.1_ATP/GTP-binding protein family, GeneName=emb1579	IPR045353_LAIKA domain; IPR025954_DBC1/CARP1 catalytically inactive NUDIX hydrolase domain; IPR011992_EF-hand domain pair	0.196667	0	0.12	0.686667	0	0.59	0	0	0	0	0	0.12	0.24	1.07	0.99	0
Am_Tr_000664	4187	XP_004490094.1_protein SHORT ROOT IN SALT MEDIUM 1 isoform X1 [Cicer arietinum]	AT2G03150.2_ATP/GTP-binding protein family, GeneName=emb1579	IPR045354_BURAN domain; IPR045353_LAIKA domain; IPR025954_DBC1/CARP1 catalytically inactive NUDIX hydrolase domain	0.376667	1.43333	2.11333	1.11	0.64	0	0.49	0.29	2.07	1.94	2.18	1	3.16	0.31	0.2	2.82
Am_Tr_000665	951	.	.	.	0.0833333	0	0.163333	0.06	0	0.24	0.01	0	0	0	0.14	0.35	0	0	0.18	0
Am_Tr_000666	697	TKY69650.1_Cell division cycle and apoptosis regulator protein 1 [Spatholobus suberectus]	AT2G03150.2_ATP/GTP-binding protein family, GeneName=emb1579	IPR025954_DBC1/CARP1 catalytically inactive NUDIX hydrolase domain	0.0966667	0.87	0.573333	0.13	0	0	0.29	1.39	0.54	0.68	0	1.35	0.37	0.39	0	0
Am_Tr_000667	1565	PNX97784.1_cell division cycle and apoptosis regulator protein, partial [Trifolium pratense]	AT2G03150.2_ATP/GTP-binding protein family, GeneName=emb1579	.	9.93667	22.06	10.6167	15.4133	9.2	10.21	10.4	21.26	27.06	17.86	1.19	15.7	14.96	7.86	16.12	22.26
Am_Tr_000668	2001	RZB56904.1_GTP-binding protein YPTM2, partial [Glycine soja]	AT4G17530.1_RAB GTPase homolog 1C, GeneName=RAB1C	.	0.21	0	0.136667	0.0133333	0	0	0.63	0	0	0	0	0.41	0	0	0.04	0
Am_Tr_000669	2063	XP_040871128.1_uncharacterized protein LOC100783333 isoform X1 [Glycine max]	AT4G17530.1_RAB GTPase homolog 1C, GeneName=RAB1C	.	0.563333	0.673333	0	0.353333	0.18	1	0.51	0.58	0	1.44	0	0	0	0.29	0.68	0.09
Am_Tr_000670	2160	RZB56904.1_GTP-binding protein YPTM2, partial [Glycine soja]	AT4G17530.1_RAB GTPase homolog 1C, GeneName=RAB1C	.	0.126667	0.386667	0.613333	0.426667	0.38	0	0	0	1.16	0	0.66	0	1.18	0.33	0.39	0.56
Am_Tr_000671	3376	AFK48486.1_unknown [Lotus japonicus] KAH7514241.1 hypothetical protein FEM48_Zijuj11G0067900 [Ziziphus jujuba var. spinosa]	AT4G17530.1_RAB GTPase homolog 1C, GeneName=RAB1C	.	0.273333	0.333333	0.206667	0.173333	0.16	0	0.66	0.53	0.47	0	0.09	0.16	0.37	0.52	0	0
Am_Tr_000672	1021	RZB56904.1_GTP-binding protein YPTM2, partial [Glycine soja]	AT4G17530.1_RAB GTPase homolog 1C, GeneName=RAB1C	IPR005225_Small GTP-binding protein domain; IPR001806_Small GTPase; IPR027417_P-loop containing nucleoside triphosphate hydrolase	1.08667	2.38667	1.00333	1.57333	1.64	1.03	0.59	2.91	2.15	2.1	0.4	0.57	2.04	2.5	0.64	1.58
Am_Tr_000673	1904	AFK48486.1_unknown [Lotus japonicus] KAH7514241.1 hypothetical protein FEM48_Zijuj11G0067900 [Ziziphus jujuba var. spinosa]	AT4G17530.1_RAB GTPase homolog 1C, GeneName=RAB1C	.	0.5	0.466667	0.17	0.146667	0.21	0	1.29	0	1.4	0	0.42	0	0.09	0	0.44	0
Am_Tr_000674	1910	AFK48486.1_unknown [Lotus japonicus] KAH7514241.1 hypothetical protein FEM48_Zijuj11G0067900 [Ziziphus jujuba var. spinosa]	AT4G17530.1_RAB GTPase homolog 1C, GeneName=RAB1C	.	0.113333	0.46	0	0.0933333	0	0.24	0.1	0.58	0	0.8	0	0	0	0	0.28	0
Am_Tr_000675	1269	RZB56904.1_GTP-binding protein YPTM2, partial [Glycine soja]	AT4G17530.1_RAB GTPase homolog 1C, GeneName=RAB1C	IPR027417_P-loop containing nucleoside triphosphate hydrolase; IPR001806_Small GTPase; IPR005225_Small GTP-binding protein domain	176.213	184.403	173.087	127.65	163.05	169.3	196.29	189.48	148.75	214.98	150.14	195.7	173.42	153.28	128.47	101.2
Am_Tr_000676	3285	AFK48486.1_unknown [Lotus japonicus] KAH7514241.1 hypothetical protein FEM48_Zijuj11G0067900 [Ziziphus jujuba var. spinosa]	AT4G17530.1_RAB GTPase homolog 1C, GeneName=RAB1C	.	0.0766667	0.15	0.193333	0.233333	0	0.23	0	0	0	0.45	0.1	0.48	0	0	0.47	0.23
Am_Tr_000677	2154	XP_040871128.1_uncharacterized protein LOC100783333 isoform X1 [Glycine max]	AT4G17530.1_RAB GTPase homolog 1C, GeneName=RAB1C	.	0.183333	0.01	0.713333	0.01	0.44	0	0.11	0	0.03	0	0.1	1.5	0.54	0	0.03	0
Am_Tr_000678	1813	AFK48486.1_unknown [Lotus japonicus] KAH7514241.1 hypothetical protein FEM48_Zijuj11G0067900 [Ziziphus jujuba var. spinosa]	AT4G17530.1_RAB GTPase homolog 1C, GeneName=RAB1C	.	0.04	1.00333	0	1.31667	0	0.09	0.03	1.78	0.69	0.54	0	0	0	2.03	0.07	1.85
Am_Tr_000679	2737	KHN19438.1_Ras-related protein RGP1 [Glycine soja]	AT5G47960.1_RAB GTPase homolog A4C, GeneName=RABA4C	IPR027417_P-loop containing nucleoside triphosphate hydrolase; IPR001806_Small GTPase; IPR005225_Small GTP-binding protein domain	0.113333	0.0233333	0.1	0.05	0.08	0.2	0.06	0	0.07	0	0	0	0.3	0.08	0	0.07
Am_Tr_000680	1781	TKY68158.1_Ras-related protein Rab11D [Spatholobus suberectus]	AT5G47960.1_RAB GTPase homolog A4C, GeneName=RABA4C	IPR027417_P-loop containing nucleoside triphosphate hydrolase; IPR001806_Small GTPase; IPR005225_Small GTP-binding protein domain	0.87	1.15333	5.65667	2.94	0.74	1.03	0.84	0.71	1.36	1.39	5.88	6.01	5.08	3.3	1.69	3.83
Am_Tr_000681	268	KAF6330820.1_RAB7A, member RAS oncogene family [Myotis myotis]	AT1G52280.1_RAB GTPase homolog G3D, GeneName=RABG3d	.	0	0	0	0	0	0	0	0	0	0	0	0	0	0	0	0
Am_Tr_000682	1943	XP_012571881.1_probable polygalacturonase [Cicer arietinum]	AT4G33440.1_Pectin lyase-like superfamily protein	IPR000743_Glycoside hydrolase, family 28; IPR006626_Parallel beta-helix repeat; IPR011050_Pectin lyase fold/virulence factor	18.7733	0.136667	1.71	0.526667	7.15	7.9	41.27	0.41	0	0	3.09	1.44	0.6	1.17	0	0.41
Am_Tr_000683	2492	TKY52493.1_polygalacturonase protein [Spatholobus suberectus]	AT3G16850.1_Pectin lyase-like superfamily protein	IPR000743_Glycoside hydrolase, family 28; IPR011050_Pectin lyase fold/virulence factor; IPR024535_Pectate lyase superfamily protein	5.88	3.13	5.96333	3.11667	4.93	7.1	5.61	3.53	2.89	2.97	5.81	5.6	6.48	3.18	2.03	4.14
Am_Tr_000684	2309	XP_012571881.1_probable polygalacturonase [Cicer arietinum]	AT4G33440.1_Pectin lyase-like superfamily protein	IPR000743_Glycoside hydrolase, family 28; IPR006626_Parallel beta-helix repeat; IPR011050_Pectin lyase fold/virulence factor	0.36	0.06	0.17	0	0	0.32	0.76	0	0	0.18	0.36	0	0.15	0	0	0
Am_Tr_000685	2304	XP_020204372.1_probable polygalacturonase isoform X2 [Cajanus cajan]	AT3G06770.3_Pectin lyase-like superfamily protein	IPR000743_Glycoside hydrolase, family 28; IPR011050_Pectin lyase fold/virulence factor	7.76667	7.85	11.61	7.55	5.15	8.24	9.91	10.99	7.09	5.47	10.83	12.36	11.64	11.12	6.44	5.09
Am_Tr_000686	2578	XP_012571881.1_probable polygalacturonase [Cicer arietinum]	AT4G33440.1_Pectin lyase-like superfamily protein	IPR000743_Glycoside hydrolase, family 28; IPR006626_Parallel beta-helix repeat; IPR011050_Pectin lyase fold/virulence factor	2.08	0.0766667	0.176667	0.16	1.25	0.67	4.32	0.23	0	0	0	0.23	0.3	0.48	0	0
Am_Tr_000687	3766	XP_012571881.1_probable polygalacturonase [Cicer arietinum]	AT4G33440.1_Pectin lyase-like superfamily protein	IPR011050_Pectin lyase fold/virulence factor	0.36	0	0.0266667	0	0.35	0	0.73	0	0	0	0	0	0.08	0	0	0
Am_Tr_000688	2183	PNY09630.1_putative polygalacturonase-like protein [Trifolium pratense]	AT4G33440.1_Pectin lyase-like superfamily protein	IPR000743_Glycoside hydrolase, family 28; IPR011050_Pectin lyase fold/virulence factor	1.27667	0.0933333	0.973333	0	0	0	3.83	0	0.28	0	0.62	0.88	1.42	0	0	0
Am_Tr_000689	3063	TKY52493.1_polygalacturonase protein [Spatholobus suberectus]	AT3G16850.1_Pectin lyase-like superfamily protein	IPR000743_Glycoside hydrolase, family 28; IPR011050_Pectin lyase fold/virulence factor; IPR006626_Parallel beta-helix repeat	3.33667	3.93333	2.66667	1.36333	3.86	2.07	4.08	4.03	3.29	4.48	0.53	3.2	4.27	2.29	1.09	0.71
Am_Tr_000690	3999	KHN09615.1_Putative polygalacturonase [Glycine soja]	AT4G33440.1_Pectin lyase-like superfamily protein	IPR000743_Glycoside hydrolase, family 28; IPR011050_Pectin lyase fold/virulence factor; IPR006626_Parallel beta-helix repeat	6.52667	1.75	2.50333	1.39	2.82	5.21	11.55	2.27	1.1	1.88	3.03	2.68	1.8	2.93	0.52	0.72
Am_Tr_000691	2064	XP_045823685.1_LOW QUALITY PROTEIN: probable polygalacturonase [Trifolium pratense]	AT4G33440.1_Pectin lyase-like superfamily protein	IPR011050_Pectin lyase fold/virulence factor; IPR006626_Parallel beta-helix repeat; IPR000743_Glycoside hydrolase, family 28	43.4	13.3567	31.8167	12.9967	14.04	61.73	54.43	20.23	7.74	12.1	27.03	37.98	30.44	25.66	5.44	7.89
Am_Tr_000692	978	KEH17976.1_1-aminocyclopropane-1-carboxylate oxidase-like protein [Medicago truncatula]	AT1G06620.2_2-oxoglutarate (2OG) and Fe(II)-dependent oxygenase superfamily protein	IPR044861_Isopenicillin N synthase-like, Fe(2+) 2OG dioxygenase domain	1.72667	3.16667	1.23667	2.16667	0.1	1.93	3.15	1.83	3.03	4.64	0.87	1.05	1.79	1.37	2.98	2.15
Am_Tr_000693	883	KEH17976.1_1-aminocyclopropane-1-carboxylate oxidase-like protein [Medicago truncatula]	AT5G43440.2_2-oxoglutarate (2OG) and Fe(II)-dependent oxygenase superfamily protein	IPR044861_Isopenicillin N synthase-like, Fe(2+) 2OG dioxygenase domain	0	0.283333	0	0.423333	0	0	0	0.85	0	0	0	0	0	0	1.27	0
Am_Tr_000694	901	KHN09615.1_Putative polygalacturonase [Glycine soja]	AT4G33440.1_Pectin lyase-like superfamily protein	IPR000743_Glycoside hydrolase, family 28; IPR011050_Pectin lyase fold/virulence factor	5.15667	2.41333	2.77667	1.31667	4.49	3.42	7.56	3.31	1.74	2.19	3.68	2.12	2.53	2.04	0.89	1.02
Am_Tr_000695	1803	XP_003617307.1_probable polygalacturonase [Medicago truncatula] AET00266.1 polygalacturonase/glycoside hydrolase family protein [Medicago truncatula] RHN57601.1 putative galacturan 1,4-alpha-galacturonidase [Medicago truncatula]	AT4G23820.1_Pectin lyase-like superfamily protein	IPR006626_Parallel beta-helix repeat; IPR000743_Glycoside hydrolase, family 28; IPR011050_Pectin lyase fold/virulence factor	0.786667	10.7933	24.6133	4.78	1.25	0.87	0.24	8.31	13.73	10.34	21.11	26.16	26.57	4.29	4.22	5.83
Am_Tr_000696	560	XP_003617307.1_probable polygalacturonase [Medicago truncatula] AET00266.1 polygalacturonase/glycoside hydrolase family protein [Medicago truncatula] RHN57601.1 putative galacturan 1,4-alpha-galacturonidase [Medicago truncatula]	AT4G23820.1_Pectin lyase-like superfamily protein	IPR011050_Pectin lyase fold/virulence factor; IPR024535_Pectate lyase superfamily protein	0.49	0.19	0	0.246667	0.41	1.06	0	0	0	0.57	0	0	0	0	0.74	0
Am_Tr_000697	888	GAU12608.1_hypothetical protein TSUD_132180 [Trifolium subterraneum]	AT4G23820.1_Pectin lyase-like superfamily protein	.	0.42	0.706667	1.93	1.03	0.17	0.68	0.41	0.65	0.35	1.12	2.17	2.45	1.17	0.72	0.78	1.59
Am_Tr_000698	673	XP_004499965.1_probable polygalacturonase [Cicer arietinum]	AT4G23820.1_Pectin lyase-like superfamily protein	IPR011050_Pectin lyase fold/virulence factor; IPR024535_Pectate lyase superfamily protein	0.433333	3.42333	1.20667	0.853333	0	1.3	0	1.81	7.48	0.98	0	2.73	0.89	0	1.94	0.62
Am_Tr_000699	842	XP_004499965.1_probable polygalacturonase [Cicer arietinum]	AT4G23820.1_Pectin lyase-like superfamily protein	IPR011050_Pectin lyase fold/virulence factor; IPR000743_Glycoside hydrolase, family 28	31.7533	10.5733	16.3933	3.40333	44.91	26.14	24.21	4.96	10.89	15.87	10.43	17.64	21.11	1.36	1.34	7.51
Am_Tr_000700	1134	XP_027189546.1_protein Dr1 homolog isoform X2 [Cicer arietinum]	AT5G23090.4_nuclear factor Y, subunit B13, GeneName=NF-YB13	IPR003958_Transcription factor CBF/NF-Y/archaeal histone domain; IPR009072_Histone-fold	188.157	77.1967	65.4967	98.5233	97.12	212.25	255.1	87.92	70.4	73.27	57.27	72.4	66.82	113.65	83.61	98.31
Am_Tr_000701	3183	XP_045824346.1_protein Dr1 homolog [Trifolium pratense]	AT5G23090.4_nuclear factor Y, subunit B13, GeneName=NF-YB13	IPR003958_Transcription factor CBF/NF-Y/archaeal histone domain; IPR009072_Histone-fold	16.07	4.5	3.83667	8.86333	5.13	19.05	24.03	8.37	3.01	2.12	2.66	3.67	5.18	14.34	4.89	7.36
Am_Tr_000702	1724	XP_045824346.1_protein Dr1 homolog [Trifolium pratense]	AT5G23090.4_nuclear factor Y, subunit B13, GeneName=NF-YB13	.	2.65667	0	0.666667	1.11	0	2.64	5.33	0	0	0	0	0.95	1.05	2.84	0	0.49
Am_Tr_000703	3773	XP_045824346.1_protein Dr1 homolog [Trifolium pratense]	AT5G23090.4_nuclear factor Y, subunit B13, GeneName=NF-YB13	.	5.54333	0.773333	0.0366667	2.07333	4.99	3.57	8.07	1.47	0.23	0.62	0.11	0	0	3.43	0.89	1.9
Am_Tr_000704	2600	RDY05568.1_Protein Dr1-like protein [Mucuna pruriens]	AT5G08190.2_nuclear factor Y, subunit B12, GeneName=NF-YB12	.	5.36333	2.67	0.676667	2.08	2.4	3.4	10.29	7.26	0.75	0	0.45	0	1.58	5.03	0.39	0.82
Am_Tr_000705	1376	XP_004508593.1_protein Dr1 homolog isoform X2 [Cicer arietinum]	AT5G23090.4_nuclear factor Y, subunit B13, GeneName=NF-YB13	IPR003958_Transcription factor CBF/NF-Y/archaeal histone domain; IPR009072_Histone-fold	7.69	5.78333	2.57667	4.16333	6.55	2.82	13.7	8.87	3.36	5.12	1.36	3.71	2.66	8.91	2.25	1.33
Am_Tr_000706	390	.	.	.	2.41333	2.99	0.726667	4.22667	0.59	3.51	3.14	5.76	3.21	0	0.53	1.65	0	7.93	4.21	0.54
Am_Tr_000707	211	.	.	.	0	1.68333	0	0	0	0	0	5.05	0	0	0	0	0	0	0	0
Am_Tr_000708	1541	XP_027329536.1_protein Dr1 homolog isoform X2 [Abrus precatorius]	AT5G08190.2_nuclear factor Y, subunit B12, GeneName=NF-YB12	.	11.0633	7.98	6.34333	7.07	6.37	15.19	11.63	10.31	7.7	5.93	8.88	8	2.15	11.18	6.38	3.65
Am_Tr_000709	867	KJB06876.1_hypothetical protein B456_001G064700 [Gossypium raimondii]	AT5G08190.2_nuclear factor Y, subunit B12, GeneName=NF-YB12	.	0.2	1.46	0.56	1.16333	0	0.47	0.13	2.14	0.52	1.72	0.37	0.6	0.71	2.55	0.51	0.43
Am_Tr_000710	2302	XP_027919242.1_protein Dr1 homolog isoform X2 [Vigna unguiculata]	AT5G08190.2_nuclear factor Y, subunit B12, GeneName=NF-YB12	.	0.806667	2.80333	0.58	1.56	0.58	0.87	0.97	4.54	1.36	2.51	0.03	1.1	0.61	4.39	0.29	0
Am_Tr_000711	1081	XP_004508592.1_protein Dr1 homolog isoform X1 [Cicer arietinum]	AT5G08190.1_nuclear factor Y, subunit B12, GeneName=NF-YB12	IPR003958_Transcription factor CBF/NF-Y/archaeal histone domain; IPR009072_Histone-fold	87.5067	72.3267	47.9633	59.26	32.22	112.69	117.61	75.87	62.4	78.71	45.27	52.25	46.37	96	41.97	39.81
Am_Tr_000712	1430	XP_025676667.1_uncharacterized protein At2g38710 [Arachis hypogaea] QHN79582.1 uncharacterized protein DS421_19g671180 [Arachis hypogaea]	AT2G38710.1_AMMECR1 family	.	3.36333	10.8967	4.14	8.95	5.69	2.41	1.99	15.52	10.88	6.29	3.88	6.17	2.37	2.07	8.01	16.77
Am_Tr_000713	4874	XP_027351561.1_F-box/LRR-repeat protein 3 isoform X2 [Abrus precatorius]	AT5G27920.1_F-box family protein	IPR006553_Leucine-rich repeat, cysteine-containing subtype; IPR001611_Leucine-rich repeat	0	0	0.0133333	0	0	0	0	0	0	0	0	0	0.04	0	0	0
Am_Tr_000714	1117	XP_027365408.1_uncharacterized protein At2g38710 isoform X2 [Abrus precatorius]	AT2G38710.1_AMMECR1 family	.	2.41333	3.03	1.55667	1.41333	5.49	0	1.75	2.47	6.6	0.02	0	4.67	0	0	0.1	4.14
Am_Tr_000715	1003	.	.	.	0.303333	2.96333	1.6	3.21667	0.91	0	0	3.67	0.26	4.96	2.03	2.77	0	3.76	0	5.89
Am_Tr_000716	1061	XP_019459772.1_PREDICTED: uncharacterized protein LOC109359528 [Lupinus angustifolius]	.	.	5.44333	6.26667	5.76	4.63667	1.41	6.01	8.91	7.92	5.45	5.43	6.01	6.16	5.11	3.41	5.51	4.99
Am_Tr_000717	1295	XP_025676667.1_uncharacterized protein At2g38710 [Arachis hypogaea] QHN79582.1 uncharacterized protein DS421_19g671180 [Arachis hypogaea]	AT2G38710.1_AMMECR1 family	.	0.793333	1.86333	1.07667	2.68667	0.34	1.16	0.88	1.41	1.31	2.87	0	1.49	1.74	1.2	2.46	4.4
Am_Tr_000718	947	XP_027365408.1_uncharacterized protein At2g38710 isoform X2 [Abrus precatorius]	AT2G38710.1_AMMECR1 family	.	2.59	0	1.52333	1.93667	7.44	0.33	0	0	0	0	0	0	4.57	0	5.81	0
Am_Tr_000719	1534	XP_027351561.1_F-box/LRR-repeat protein 3 isoform X2 [Abrus precatorius]	AT5G27920.1_F-box family protein	IPR001611_Leucine-rich repeat; IPR006553_Leucine-rich repeat, cysteine-containing subtype	4.37	0.663333	0.48	5.96	3.68	3.78	5.65	0.9	0.58	0.51	0.31	0.44	0.69	5.7	4.35	7.83
Am_Tr_000720	1350	XP_025676667.1_uncharacterized protein At2g38710 [Arachis hypogaea] QHN79582.1 uncharacterized protein DS421_19g671180 [Arachis hypogaea]	AT2G38710.1_AMMECR1 family	.	0.0766667	3.84	0	2.32	0	0.23	0	0	5.72	5.8	0	0	0	5.53	1.43	0
Am_Tr_000721	1465	XP_025676667.1_uncharacterized protein At2g38710 [Arachis hypogaea] QHN79582.1 uncharacterized protein DS421_19g671180 [Arachis hypogaea]	AT2G38710.1_AMMECR1 family	.	0.33	3.65	0.473333	2.65667	0	0.99	0	1.41	5.64	3.9	0	0	1.42	1.7	1.97	4.3
Am_Tr_000722	1375	XP_025676667.1_uncharacterized protein At2g38710 [Arachis hypogaea] QHN79582.1 uncharacterized protein DS421_19g671180 [Arachis hypogaea]	AT2G38710.1_AMMECR1 family	.	0.583333	0	0.16	2.13667	0	1.37	0.38	0	0	0	0.39	0.09	0	3.08	3.33	0
Am_Tr_000723	1520	XP_025676667.1_uncharacterized protein At2g38710 [Arachis hypogaea] QHN79582.1 uncharacterized protein DS421_19g671180 [Arachis hypogaea]	AT2G38710.1_AMMECR1 family	.	0	4.14	0.68	2.43	0	0	0	0.07	2.37	9.98	0	0	2.04	3.68	3.61	0
Am_Tr_000724	1173	QHN77530.1_NADP-dependent malic enzyme 4 [Arachis hypogaea]	AT2G19900.2_NADP-malic enzyme 1, GeneName=NADP-ME1	.	0.343333	1.06333	1.33333	0	0	0.94	0.09	3.19	0	0	3.99	0	0.01	0	0	0
Am_Tr_000725	1944	XP_027351561.1_F-box/LRR-repeat protein 3 isoform X2 [Abrus precatorius]	AT5G27920.1_F-box family protein	IPR006553_Leucine-rich repeat, cysteine-containing subtype; IPR001611_Leucine-rich repeat	0.52	0.436667	0.313333	0.563333	0.07	0.83	0.66	0	0.69	0.62	0.12	0.29	0.53	0.53	0.49	0.67
Am_Tr_000726	5021	XP_027351561.1_F-box/LRR-repeat protein 3 isoform X2 [Abrus precatorius]	AT5G27920.1_F-box family protein	IPR001611_Leucine-rich repeat; IPR006553_Leucine-rich repeat, cysteine-containing subtype	0	0	0.0366667	0	0	0	0	0	0	0	0	0	0.11	0	0	0
Am_Tr_000727	4177	XP_027351561.1_F-box/LRR-repeat protein 3 isoform X2 [Abrus precatorius]	AT5G27920.1_F-box family protein	IPR001611_Leucine-rich repeat; IPR006553_Leucine-rich repeat, cysteine-containing subtype	0.37	3.59667	1.79667	1.85333	0.71	0.37	0.03	4.21	3.82	2.76	0.45	2.78	2.16	1.97	1.45	2.14
Am_Tr_000728	1126	XP_025676667.1_uncharacterized protein At2g38710 [Arachis hypogaea] QHN79582.1 uncharacterized protein DS421_19g671180 [Arachis hypogaea]	AT2G38710.1_AMMECR1 family	.	1.33667	2.61333	1.83333	2.25333	1.7	1.32	0.99	2.97	2.91	1.96	2.89	0.99	1.62	2.96	1.52	2.28
Am_Tr_000729	1083	QHN77530.1_NADP-dependent malic enzyme 4 [Arachis hypogaea]	AT2G19900.2_NADP-malic enzyme 1, GeneName=NADP-ME1	.	3.21	6.24333	5.65333	1.19667	4.26	1.86	3.51	3.09	8.28	7.36	4.59	5.08	7.29	0	3.59	0
Am_Tr_000730	972	OIW13702.1_hypothetical protein TanjilG_08044 [Lupinus angustifolius]	AT2G38710.1_AMMECR1 family	.	1.40667	4.34333	2.07667	4.56	0.98	2.13	1.11	1.35	5.04	6.64	2.14	0.45	3.64	0	6.57	7.11
Am_Tr_000731	4030	XP_027351561.1_F-box/LRR-repeat protein 3 isoform X2 [Abrus precatorius]	AT5G27920.1_F-box family protein	IPR006553_Leucine-rich repeat, cysteine-containing subtype; IPR001611_Leucine-rich repeat	0.326667	0.266667	0.756667	0.143333	0.39	0.33	0.26	0.18	0	0.62	1.43	0.42	0.42	0.34	0.06	0.03
Am_Tr_000732	1339	XP_025676667.1_uncharacterized protein At2g38710 [Arachis hypogaea] QHN79582.1 uncharacterized protein DS421_19g671180 [Arachis hypogaea]	AT2G38710.1_AMMECR1 family	IPR002733_AMMECR1 domain; IPR023473_AMMECR1; IPR036071_AMMECR1 domain superfamily	20.7633	40.48	49.3033	38.96	15.47	33.08	13.74	36.73	42.36	42.35	55	44.75	48.16	38.87	36.42	41.59
Am_Tr_000733	1027	XP_027365408.1_uncharacterized protein At2g38710 isoform X2 [Abrus precatorius]	AT2G38710.1_AMMECR1 family	.	18.0767	9.60333	6.01333	14.07	37.98	9.45	6.8	5.56	9.94	13.31	11.34	3.79	2.91	16.2	17.19	8.82
Am_Tr_000734	2091	XP_027351561.1_F-box/LRR-repeat protein 3 isoform X2 [Abrus precatorius]	AT5G27920.1_F-box family protein	IPR001611_Leucine-rich repeat; IPR006553_Leucine-rich repeat, cysteine-containing subtype	0.08	0.126667	0.303333	0	0	0	0.24	0.27	0.11	0	0.68	0	0.23	0	0	0
Am_Tr_000735	2315	XP_019459772.1_PREDICTED: uncharacterized protein LOC109359528 [Lupinus angustifolius]	.	.	1.74333	1.55667	1.9	3.00667	1.32	1.87	2.04	1.78	0.76	2.13	1.61	1.58	2.51	3.73	3.39	1.9
Am_Tr_000736	2098	TKY64867.1_Transcription initiation factor TFIID subunit 6 [Spatholobus suberectus]	AT1G04950.1_TATA BOX ASSOCIATED FACTOR II 59, GeneName=TAFII59	IPR011442_TAF6, C-terminal HEAT repeat domain; IPR016024_Armadillo-type fold	0.206667	0.623333	0.42	0.333333	0.62	0	0	1.23	0.64	0	0.46	0.8	0	1	0	0
Am_Tr_000737	2309	TKY64867.1_Transcription initiation factor TFIID subunit 6 [Spatholobus suberectus]	AT1G04950.1_TATA BOX ASSOCIATED FACTOR II 59, GeneName=TAFII59	IPR009072_Histone-fold; IPR016024_Armadillo-type fold; IPR004823_TATA box binding protein associated factor (TAF); IPR011442_TAF6, C-terminal HEAT repeat domain	1.33333	9.09	7.64667	8.87	0.46	2.07	1.47	7.95	10.03	9.29	7.19	8.45	7.3	6.93	9.22	10.46
Am_Tr_000738	726	.	.	.	0.993333	1.17333	0.336667	0.95	0.95	0.95	1.08	1.82	1.04	0.66	0.16	0.53	0.32	0.37	1.73	0.75
Am_Tr_000739	2622	XP_020226282.1_transcription factor MYBS3 [Cajanus cajan]	AT5G47390.1_myb-like transcription factor family protein	IPR001005_SANT/Myb domain; IPR006447_Myb domain, plants; IPR009057_Homeobox-like domain superfamily; IPR017930_Myb domain	6.27	17.2967	7.97667	10.36	4.62	5.37	8.82	17.44	15.01	19.44	6.54	9.31	8.08	12	10.79	8.29
Am_Tr_000740	1712	XP_020226282.1_transcription factor MYBS3 [Cajanus cajan]	AT5G47390.1_myb-like transcription factor family protein	IPR017930_Myb domain; IPR001005_SANT/Myb domain; IPR009057_Homeobox-like domain superfamily; IPR006447_Myb domain, plants	1.34	2.79667	1.20667	0.496667	2.99	0	1.03	1.69	5.51	1.19	0	0.77	2.85	0.56	0.93	0
Am_Tr_000741	2160	XP_020226282.1_transcription factor MYBS3 [Cajanus cajan]	AT5G47390.1_myb-like transcription factor family protein	IPR009057_Homeobox-like domain superfamily; IPR001005_SANT/Myb domain; IPR017930_Myb domain; IPR006447_Myb domain, plants	40.1567	101.737	48.82	83.7033	27.21	50.25	43.01	117.67	90.37	97.17	30.22	58.61	57.63	92.77	99.85	58.49
Am_Tr_000742	2555	XP_004490575.1_transcription factor DIVARICATA-like [Cicer arietinum]	AT5G58900.1_Homeodomain-like transcriptional regulator	IPR009057_Homeobox-like domain superfamily; IPR017930_Myb domain; IPR001005_SANT/Myb domain; IPR006447_Myb domain, plants	1.81	3.57	3.97	3.54	0.82	2.42	2.19	2.62	4.26	3.83	1.1	5.73	5.08	1.3	4.77	4.55
Am_Tr_000743	1370	XP_004490575.1_transcription factor DIVARICATA-like [Cicer arietinum]	AT5G58900.1_Homeodomain-like transcriptional regulator	.	1.08667	1.89	1.16333	1.94333	0.94	2.02	0.3	1.7	2.06	1.91	1.58	1.01	0.9	3.35	0.26	2.22
Am_Tr_000744	394	KAB5574021.1_hypothetical protein DKX38_001215 [Salix brachista]	AT5G47390.1_myb-like transcription factor family protein	.	0	0	0.89	0	0	0	0	0	0	0	0	2.2	0.47	0	0	0
Am_Tr_000745	2474	XP_027334971.1_transcription factor DIVARICATA-like [Abrus precatorius]	AT5G58900.1_Homeodomain-like transcriptional regulator	IPR017930_Myb domain; IPR009057_Homeobox-like domain superfamily; IPR001005_SANT/Myb domain; IPR006447_Myb domain, plants	3.52	9.76333	21.91	10.2433	4.33	4.22	2.01	7.17	12.54	9.58	18.71	25.02	22	6.44	15.35	8.94
Am_Tr_000746	2955	TKY47134.1_Transcription factor DIVARICATA [Spatholobus suberectus]	AT2G38090.1_Duplicated homeodomain-like superfamily protein	IPR001005_SANT/Myb domain; IPR009057_Homeobox-like domain superfamily; IPR017930_Myb domain	0.153333	0.693333	1.59333	0.586667	0.46	0	0	0.4	1.35	0.33	1.16	2.19	1.43	0.4	1.16	0.2
Am_Tr_000747	1403	AFK46972.1_unknown [Lotus japonicus]	AT1G67250.1_Proteasome maturation factor UMP1	.	0.116667	0.176667	0.19	0.123333	0	0.2	0.15	0.09	0.35	0.09	0.23	0.27	0.07	0.09	0.28	0
Am_Tr_000748	947	AFK46972.1_unknown [Lotus japonicus]	AT1G67250.1_Proteasome maturation factor UMP1	IPR008012_Proteasome maturation factor Ump1	5.66333	10.8033	17.7567	20.9767	7.43	5.64	3.92	8.89	11.97	11.55	20.4	17.88	14.99	18.44	20.03	24.46
Am_Tr_000749	973	XP_004505621.1_cyclin-B1-2-like isoform X2 [Cicer arietinum]	AT1G67250.1_Proteasome maturation factor UMP1	IPR008012_Proteasome maturation factor Ump1	87.9233	119.477	135.397	112.207	66.44	108.4	88.93	117.37	117.27	123.79	155.65	127.43	123.11	108.5	116.29	111.83
Am_Tr_000750	1199	GAU33964.1_hypothetical protein TSUD_60940 [Trifolium subterraneum]	.	.	0.906667	0.766667	0.346667	0.946667	1.77	0.95	0	1.23	0.64	0.43	0.49	0.55	0	1.05	1.1	0.69
Am_Tr_000751	992	OVA06764.1_Proteasome maturation factor UMP1 [Macleaya cordata]	AT1G67250.1_Proteasome maturation factor UMP1	.	0.43	0.483333	0.46	0.74	0.68	0.28	0.33	0.65	0.44	0.36	0	1.03	0.35	0.7	0.71	0.81
Am_Tr_000752	1355	GAU33964.1_hypothetical protein TSUD_60940 [Trifolium subterraneum]	.	.	0.69	0	0.166667	0.26	0	0.37	1.7	0	0	0	0	0	0.5	0.78	0	0
Am_Tr_000753	6594	TKY73839.1_Phosphatidylinositol 4-kinase beta 1 [Spatholobus suberectus]	AT5G64070.1_phosphatidylinositol 4-OH kinase beta1, GeneName=PI-4KBETA1	IPR016024_Armadillo-type fold; IPR011009_Protein kinase-like domain superfamily	0.47	0.44	0.21	0.196667	0.05	0.38	0.98	0.4	0.51	0.41	0.13	0.41	0.09	0.33	0	0.26
Am_Tr_000754	4949	XP_004502930.1_phosphatidylinositol 4-kinase beta 1 isoform X1 [Cicer arietinum]	AT5G64070.1_phosphatidylinositol 4-OH kinase beta1, GeneName=PI-4KBETA1	IPR016024_Armadillo-type fold; IPR011009_Protein kinase-like domain superfamily; IPR000403_Phosphatidylinositol 3-/4-kinase, catalytic domain	23.75	20.0033	17.07	24.85	20.33	34.52	16.4	17.71	21.37	20.93	9.14	21.42	20.65	21.45	25.23	27.87
Am_Tr_000755	5967	XP_027340614.1_phosphatidylinositol 4-kinase beta 1-like [Abrus precatorius]	AT5G64070.1_phosphatidylinositol 4-OH kinase beta1, GeneName=PI-4KBETA1	IPR016024_Armadillo-type fold; IPR000403_Phosphatidylinositol 3-/4-kinase, catalytic domain; IPR011009_Protein kinase-like domain superfamily	1.58667	2.15667	0.39	1.37333	2.1	1.33	1.33	2.05	1.76	2.66	0.56	0	0.61	1.82	0.64	1.66
Am_Tr_000756	5937	XP_027340614.1_phosphatidylinositol 4-kinase beta 1-like [Abrus precatorius]	AT5G64070.1_phosphatidylinositol 4-OH kinase beta1, GeneName=PI-4KBETA1	IPR016024_Armadillo-type fold; IPR011009_Protein kinase-like domain superfamily; IPR000403_Phosphatidylinositol 3-/4-kinase, catalytic domain	5.70333	7.39	5.67	7.09	6.78	6.56	3.77	7.6	8.73	5.84	4.39	7.49	5.13	5.96	8.96	6.35
Am_Tr_000757	5970	XP_027340614.1_phosphatidylinositol 4-kinase beta 1-like [Abrus precatorius]	AT5G64070.1_phosphatidylinositol 4-OH kinase beta1, GeneName=PI-4KBETA1	IPR016024_Armadillo-type fold; IPR011009_Protein kinase-like domain superfamily; IPR000403_Phosphatidylinositol 3-/4-kinase, catalytic domain	3.22	3.2	2.62667	3.09	5.12	2.81	1.73	3.41	3.77	2.42	1.5	3.08	3.3	2.63	3.12	3.52
Am_Tr_000758	2922	XP_027359619.1_phosphatidylinositol 4-kinase beta 1-like isoform X3 [Abrus precatorius]	AT5G64070.1_phosphatidylinositol 4-OH kinase beta1, GeneName=PI-4KBETA1	.	4.98667	2.76	1.98	3.24333	1.67	7.65	5.64	3.01	2.45	2.82	1.73	2.18	2.03	3.78	3.21	2.74
Am_Tr_000759	4982	XP_004502930.1_phosphatidylinositol 4-kinase beta 1 isoform X1 [Cicer arietinum]	AT5G64070.1_phosphatidylinositol 4-OH kinase beta1, GeneName=PI-4KBETA1	IPR011009_Protein kinase-like domain superfamily; IPR000403_Phosphatidylinositol 3-/4-kinase, catalytic domain; IPR016024_Armadillo-type fold	8.57333	7.40333	5.53333	7.34667	8.65	10.25	6.82	6.82	8.98	6.41	2.72	8.52	5.36	3.87	8.23	9.94
Am_Tr_000760	2845	XP_010461372.1_PREDICTED: phosphatidylinositol 4-kinase beta 1 [Camelina sativa]	AT5G64070.1_phosphatidylinositol 4-OH kinase beta1, GeneName=PI-4KBETA1	.	1.51333	1.72333	3.27667	2.10333	1.43	2.44	0.67	1.71	2.99	0.47	6.35	2.3	1.18	2.49	2.44	1.38
Am_Tr_000761	6000	XP_027340614.1_phosphatidylinositol 4-kinase beta 1-like [Abrus precatorius]	AT5G64070.1_phosphatidylinositol 4-OH kinase beta1, GeneName=PI-4KBETA1	IPR016024_Armadillo-type fold; IPR000403_Phosphatidylinositol 3-/4-kinase, catalytic domain; IPR011009_Protein kinase-like domain superfamily	0.92	0.923333	0.193333	0.643333	1.59	0.57	0.6	0.91	0.75	1.11	0.19	0	0.39	0.8	0.22	0.91
Am_Tr_000762	6627	TKY73839.1_Phosphatidylinositol 4-kinase beta 1 [Spatholobus suberectus]	AT5G64070.1_phosphatidylinositol 4-OH kinase beta1, GeneName=PI-4KBETA1	IPR016024_Armadillo-type fold; IPR011009_Protein kinase-like domain superfamily	0.23	0.196667	0.0966667	0.103333	0.05	0.18	0.46	0.18	0.22	0.19	0.04	0.17	0.08	0.19	0	0.12
Am_Tr_000763	1984	KEH26885.1_glycoside hydrolase family 1 protein [Medicago truncatula]	AT2G44480.1_beta glucosidase 17, GeneName=BGLU17	IPR001360_Glycoside hydrolase family 1; IPR017853_Glycoside hydrolase superfamily	0	0	0	0	0	0	0	0	0	0	0	0	0	0	0	0
Am_Tr_000764	2027	XP_003620203.1_beta-glucosidase 12 [Medicago truncatula] AES76421.1 glycoside hydrolase family 1 protein [Medicago truncatula] RHN52583.1 putative beta-glucosidase [Medicago truncatula]	AT2G44480.1_beta glucosidase 17, GeneName=BGLU17	IPR001360_Glycoside hydrolase family 1; IPR017853_Glycoside hydrolase superfamily	0.0733333	0	0	0	0.22	0	0	0	0	0	0	0	0	0	0	0
Am_Tr_000765	2083	XP_003620203.1_beta-glucosidase 12 [Medicago truncatula] AES76421.1 glycoside hydrolase family 1 protein [Medicago truncatula] RHN52583.1 putative beta-glucosidase [Medicago truncatula]	AT2G44480.2_beta glucosidase 17, GeneName=BGLU17	IPR001360_Glycoside hydrolase family 1; IPR017853_Glycoside hydrolase superfamily	0	0	0	0	0	0	0	0	0	0	0	0	0	0	0	0
Am_Tr_000766	1808	XP_003620203.1_beta-glucosidase 12 [Medicago truncatula] AES76421.1 glycoside hydrolase family 1 protein [Medicago truncatula] RHN52583.1 putative beta-glucosidase [Medicago truncatula]	AT2G44480.1_beta glucosidase 17, GeneName=BGLU17	IPR017853_Glycoside hydrolase superfamily; IPR001360_Glycoside hydrolase family 1	0.0566667	0	0	0	0	0.12	0.05	0	0	0	0	0	0	0	0	0
Am_Tr_000767	2203	KEH26885.1_glycoside hydrolase family 1 protein [Medicago truncatula]	AT2G44480.1_beta glucosidase 17, GeneName=BGLU17	IPR001360_Glycoside hydrolase family 1; IPR017853_Glycoside hydrolase superfamily	0	0	0	0	0	0	0	0	0	0	0	0	0	0	0	0
Am_Tr_000768	1819	KEH26881.1_glycoside hydrolase family 1 protein [Medicago truncatula]	AT5G42260.1_beta glucosidase 12, GeneName=BGLU12	IPR001360_Glycoside hydrolase family 1; IPR017853_Glycoside hydrolase superfamily	0.0666667	0.166667	0	0	0	0	0.2	0.16	0.34	0	0	0	0	0	0	0
Am_Tr_000769	1822	KEH26881.1_glycoside hydrolase family 1 protein [Medicago truncatula]	AT5G42260.1_beta glucosidase 12, GeneName=BGLU12	IPR001360_Glycoside hydrolase family 1; IPR017853_Glycoside hydrolase superfamily	0.776667	3.08	2.38333	3.75333	0.09	0.87	1.37	2.97	3.64	2.63	1.61	2.37	3.17	4.54	3.35	3.37
Am_Tr_000770	2603	XP_003620192.2_beta-glucosidase 12 isoform X1 [Medicago truncatula] AES76410.2 glycoside hydrolase family 1 protein [Medicago truncatula] AFK35893.1 unknown [Medicago truncatula] RHN52578.1 putative beta-glucosidase [Medicago truncatula]	AT5G42260.1_beta glucosidase 12, GeneName=BGLU12	IPR001360_Glycoside hydrolase family 1; IPR017853_Glycoside hydrolase superfamily	5.80333	1.89667	5.78667	4.08333	17.21	0.2	0	1.58	2.52	1.59	4.84	5.94	6.58	2.54	6.82	2.89
Am_Tr_000771	2485	XP_003620192.2_beta-glucosidase 12 isoform X1 [Medicago truncatula] AES76410.2 glycoside hydrolase family 1 protein [Medicago truncatula] AFK35893.1 unknown [Medicago truncatula] RHN52578.1 putative beta-glucosidase [Medicago truncatula]	AT5G44640.1_beta glucosidase 13, GeneName=BGLU13	IPR017853_Glycoside hydrolase superfamily; IPR001360_Glycoside hydrolase family 1	0.556667	4.11333	1.84	3.91	0.15	0.83	0.69	6.64	2.65	3.05	2.29	2.11	1.12	4.46	4.23	3.04
Am_Tr_000772	2425	XP_045824297.1_beta-glucosidase 12-like [Trifolium pratense]	AT2G44480.1_beta glucosidase 17, GeneName=BGLU17	IPR001360_Glycoside hydrolase family 1; IPR017853_Glycoside hydrolase superfamily	45.1767	28.73	29.1233	25.5333	6.22	37.47	91.84	23.76	18.18	44.25	12.68	30.48	44.21	26.03	30.42	20.15
Am_Tr_000773	2512	XP_045824297.1_beta-glucosidase 12-like [Trifolium pratense]	AT2G44480.1_beta glucosidase 17, GeneName=BGLU17	IPR001360_Glycoside hydrolase family 1; IPR017853_Glycoside hydrolase superfamily	0.54	0.5	1.27333	0.86	0.25	0.5	0.87	0.15	0.46	0.89	0.66	1.36	1.8	0.92	1.13	0.53
Am_Tr_000774	1306	XP_020228475.1_uncharacterized protein LOC109809547 [Cajanus cajan]	.	.	0.156667	0.24	0.466667	0.23	0	0.23	0.24	0.22	0.5	0	0.39	0.43	0.58	0	0	0.69
Am_Tr_000775	889	XP_020228475.1_uncharacterized protein LOC109809547 [Cajanus cajan]	AT1G13770.4_root UVB sensitive protein (Protein of unknown function, DUF647), GeneName=RUS3	.	0.53	0	0	0.123333	0	1.15	0.44	0	0	0	0	0	0	0	0	0.37
Am_Tr_000776	400	XP_020228475.1_uncharacterized protein LOC109809547 [Cajanus cajan]	.	.	1.82	1.99	3.63333	5.04	1.67	3.79	0	0.54	2.21	3.22	1.47	4.05	5.38	5.14	7.34	2.64
Am_Tr_000777	1032	XP_020228475.1_uncharacterized protein LOC109809547 [Cajanus cajan]	.	.	3.08	2.06667	2.49333	1.97333	5.32	2.06	1.86	3.9	1.09	1.21	2.46	1.21	3.81	1.74	1.49	2.69
Am_Tr_000778	889	XP_020228475.1_uncharacterized protein LOC109809547 [Cajanus cajan]	AT1G13770.4_root UVB sensitive protein (Protein of unknown function, DUF647), GeneName=RUS3	.	10.3767	7.69333	5.10333	6.13667	10.82	7.96	12.35	6.51	7.31	9.26	3.79	5.53	5.99	6.95	6.64	4.82
Am_Tr_000779	469	XP_020228475.1_uncharacterized protein LOC109809547 [Cajanus cajan]	.	.	3.1	4.25	3.51667	1.82	6.2	3.1	0	4.69	5.09	2.97	1.73	3.79	5.03	0.51	1.87	3.08
Am_Tr_000780	247	TKY65015.1_TdcA1-ORF1-ORF2 protein [Spatholobus suberectus]	.	.	0	1.67333	5.65	0.733333	0	0	0	0	5.02	0	12.73	4.22	0	0	2.2	0
Am_Tr_000781	941	XP_020228475.1_uncharacterized protein LOC109809547 [Cajanus cajan]	AT1G13770.4_root UVB sensitive protein (Protein of unknown function, DUF647), GeneName=RUS3	.	6.55333	7.74667	4.95	6.05667	12.13	3.05	4.48	6.32	7.52	9.4	3.95	5.96	4.94	5.22	7.34	5.61
Am_Tr_000782	390	TKY65015.1_TdcA1-ORF1-ORF2 protein [Spatholobus suberectus]	.	.	0.62	0.41	0.16	0.793333	0.73	1.13	0	0.53	0.7	0	0	0	0.48	0	0.54	1.84
Am_Tr_000783	959	XP_020228475.1_uncharacterized protein LOC109809547 [Cajanus cajan]	.	.	0.33	1.39667	0	0.256667	0	0	0.99	0	2.46	1.73	0	0	0	0	0.77	0
Am_Tr_000784	227	.	.	.	0	0	0	0	0	0	0	0	0	0	0	0	0	0	0	0
Am_Tr_000785	1734	.	.	.	0.02	0.0666667	0.35	0.226667	0.06	0	0	0	0	0.2	0.19	0.26	0.6	0	0.68	0
Am_Tr_000786	837	.	.	.	0	0	0.553333	0.153333	0	0	0	0	0	0	1.35	0	0.31	0	0.46	0
Am_Tr_000787	933	.	.	.	0	1.06667	0.71	0.2	0	0	0	0	2.9	0.3	1.66	0.01	0.46	0.33	0	0.27
Am_Tr_000788	1025	.	.	.	0.16	0.373333	0.626667	0.783333	0.24	0.24	0	0	0.26	0.86	0.7	1.05	0.13	0.4	1.59	0.36
Am_Tr_000789	2360	.	.	.	0.113333	0.816667	1.27333	1.87	0	0.34	0	0.46	1.01	0.98	1.15	1.14	1.53	1.19	0.41	4.01
Am_Tr_000790	745	.	.	.	0.233333	0	0	0.296667	0.55	0	0.15	0	0	0	0	0	0	0.46	0	0.43
Am_Tr_000791	931	.	.	.	0.653333	1.32333	2.68667	2.07	0.14	1.82	0	1.48	1.29	1.2	1.39	3.64	3.03	1.94	1.29	2.98
Am_Tr_000792	770	.	.	.	0	0.91	1.11667	0.92	0	0	0	1.51	0.75	0.47	1.84	0.72	0.79	0.43	1.75	0.58
Am_Tr_000793	1625	.	.	.	2.04	0.88	1.16	0	2.14	3.98	0	1.63	1.01	0	0	3.48	0	0	0	0
Am_Tr_000794	1562	.	.	.	6.57333	5.30667	3.90667	8.04	6.96	12.76	0	7.26	8.66	0	7.14	4.58	0	10.91	13.21	0
Am_Tr_000795	1542	.	.	.	0	0	1.53333	1.14	0	0	0	0	0	0	1.71	2.89	0	3.23	0.19	0
Am_Tr_000796	1605	.	.	.	3.87333	6.28667	5.10333	13.8533	3.27	4.28	4.07	2.35	4.86	11.65	4.22	1	10.09	7.99	8.04	25.53
Am_Tr_000797	984	.	.	.	0	0	0	0	0	0	0	0	0	0	0	0	0	0	0	0
Am_Tr_000798	706	.	.	.	0	0.0566667	0.0566667	0.333333	0	0	0	0	0	0.17	0	0	0.17	0	0.8	0.2
Am_Tr_000799	3911	TKY52849.1_Phosphatidate phosphatase PAH1 [Spatholobus suberectus]	AT3G09560.2_Lipin family protein, GeneName=PAH1	IPR031703_Lipin, middle domain; IPR007651_Lipin, N-terminal; IPR036412_HAD-like superfamily; IPR031315_LNS2/PITP; IPR013209_Lipin/Ned1/Smp2 (LNS2)	0.966667	1.33	0.903333	0.526667	1.38	0.6	0.92	1.51	1.95	0.53	0.87	0.95	0.89	0.33	1.25	0
Am_Tr_000800	3702	TKY52849.1_Phosphatidate phosphatase PAH1 [Spatholobus suberectus]	AT3G09560.2_Lipin family protein, GeneName=PAH1	IPR031703_Lipin, middle domain; IPR036412_HAD-like superfamily; IPR031315_LNS2/PITP; IPR013209_Lipin/Ned1/Smp2 (LNS2); IPR007651_Lipin, N-terminal	19.82	24.93	15.9833	17.6	16.25	22.07	21.14	26.2	23.32	25.27	13.14	17.6	17.21	18.76	16.79	17.25
Am_Tr_000801	3129	XP_004493909.1_phosphatidate phosphatase PAH1-like [Cicer arietinum]	AT3G09560.2_Lipin family protein, GeneName=PAH1	IPR031703_Lipin, middle domain; IPR007651_Lipin, N-terminal; IPR036412_HAD-like superfamily; IPR013209_Lipin/Ned1/Smp2 (LNS2); IPR031315_LNS2/PITP	0.0433333	1.22	0.476667	0	0.13	0	0	0.73	0.69	2.24	0.91	0	0.52	0	0	0
Am_Tr_000802	763	KYP70813.1_Lipin-2 [Cajanus cajan]	AT3G09560.2_Lipin family protein, GeneName=PAH1	.	0.0133333	0	0	0.07	0.04	0	0	0	0	0	0	0	0	0	0.21	0
Am_Tr_000803	3354	XP_004493909.1_phosphatidate phosphatase PAH1-like [Cicer arietinum]	AT3G09560.2_Lipin family protein, GeneName=PAH1	IPR031315_LNS2/PITP; IPR036412_HAD-like superfamily; IPR013209_Lipin/Ned1/Smp2 (LNS2); IPR031703_Lipin, middle domain; IPR007651_Lipin, N-terminal	0.453333	8.59667	4.68	2.41667	0	1.11	0.25	5.19	10.08	10.52	1.77	5.22	7.05	1.89	2.26	3.1
Am_Tr_000804	1017	KYP70813.1_Lipin-2 [Cajanus cajan]	AT3G09560.2_Lipin family protein, GeneName=PAH1	IPR013209_Lipin/Ned1/Smp2 (LNS2); IPR031315_LNS2/PITP; IPR036412_HAD-like superfamily	0.4	0.606667	1.85667	0.866667	0.11	0.93	0.16	1.37	0	0.45	4.61	0.45	0.51	2.17	0.18	0.25
Am_Tr_000805	2692	KAF5960540.1_hypothetical protein HYC85_001749 [Camellia sinensis]	AT2G22240.3_myo-inositol-1-phosphate synthase 2, GeneName=MIPS2	IPR002587_Myo-inositol-1-phosphate synthase; IPR036291_NAD(P)-binding domain superfamily	0	0.73	0	0	0	0	0	1.1	1.09	0	0	0	0	0	0	0
Am_Tr_000806	2583	KAF5960540.1_hypothetical protein HYC85_001749 [Camellia sinensis]	AT5G10170.1_myo-inositol-1-phosphate synthase 3, GeneName=MIPS3	IPR002587_Myo-inositol-1-phosphate synthase; IPR036291_NAD(P)-binding domain superfamily	0	3.00333	0.00666667	0	0	0	0	4.31	4.7	0	0	0.02	0	0	0	0
Am_Tr_000807	511	KAA0873694.1_hypothetical protein EYC94_25870, partial [Enterobacter hormaechei]	AT5G10170.1_myo-inositol-1-phosphate synthase 3, GeneName=MIPS3	.	1.31333	6.92333	2.93667	2.43333	2.53	1.41	0	7.63	9.46	3.68	3	4.69	1.12	2.93	4.05	0.32
Am_Tr_000808	2565	KDO47034.1_hypothetical protein CISIN_1g010460mg [Citrus sinensis]	AT5G10170.1_myo-inositol-1-phosphate synthase 3, GeneName=MIPS3	IPR002587_Myo-inositol-1-phosphate synthase; IPR036291_NAD(P)-binding domain superfamily	0	0.0566667	0	0	0	0	0	0.01	0	0.16	0	0	0	0	0	0
Am_Tr_000809	2649	KDO47034.1_hypothetical protein CISIN_1g010460mg [Citrus sinensis]	AT2G22240.3_myo-inositol-1-phosphate synthase 2, GeneName=MIPS2	IPR002587_Myo-inositol-1-phosphate synthase; IPR036291_NAD(P)-binding domain superfamily; IPR013021_Myo-inositol-1-phosphate synthase, GAPDH-like	0	0.0733333	0	0	0	0	0	0.03	0.01	0.18	0	0	0	0	0	0
Am_Tr_000810	2449	RZC13007.1_Inositol-3-phosphate synthase isoform B [Glycine soja]	AT2G22240.3_myo-inositol-1-phosphate synthase 2, GeneName=MIPS2	IPR002587_Myo-inositol-1-phosphate synthase; IPR013021_Myo-inositol-1-phosphate synthase, GAPDH-like; IPR036291_NAD(P)-binding domain superfamily	0	12.47	0.233333	0.0633333	0	0	0	7.96	13.17	16.28	0.14	0.56	0	0	0	0.19
Am_Tr_000811	2431	KDO47034.1_hypothetical protein CISIN_1g010460mg [Citrus sinensis]	AT2G22240.1_myo-inositol-1-phosphate synthase 2, GeneName=MIPS2	IPR002587_Myo-inositol-1-phosphate synthase; IPR013021_Myo-inositol-1-phosphate synthase, GAPDH-like; IPR036291_NAD(P)-binding domain superfamily	0	0.783333	0	0	0	0	0	0.41	1.01	0.93	0	0	0	0	0	0
Am_Tr_000812	1809	KAA0873694.1_hypothetical protein EYC94_25870, partial [Enterobacter hormaechei]	AT2G22240.2_myo-inositol-1-phosphate synthase 2, GeneName=MIPS2	IPR002587_Myo-inositol-1-phosphate synthase; IPR013021_Myo-inositol-1-phosphate synthase, GAPDH-like; IPR036291_NAD(P)-binding domain superfamily	91.88	805.227	365.753	314.04	51.73	143.45	80.46	762.75	913.66	739.27	372.84	390.32	334.1	449.51	276.79	215.82
Am_Tr_000813	2474	XP_027363303.1_inositol-3-phosphate synthase [Abrus precatorius]	AT2G22240.3_myo-inositol-1-phosphate synthase 2, GeneName=MIPS2	IPR002587_Myo-inositol-1-phosphate synthase; IPR036291_NAD(P)-binding domain superfamily	0	4.61667	0.176667	0.07	0	0	0	0.56	0.14	13.15	0	0.3	0.23	0	0.21	0
Am_Tr_000814	1471	QHO58629.1_Inositol-3-phosphate synthase [Arachis hypogaea]	AT5G10170.1_myo-inositol-1-phosphate synthase 3, GeneName=MIPS3	.	0	0.54	0.51	1.15333	0	0	0	0.63	0.74	0.25	0.89	0.58	0.06	1.45	1.09	0.92
Am_Tr_000815	1204	QHO58629.1_Inositol-3-phosphate synthase [Arachis hypogaea]	AT2G22240.3_myo-inositol-1-phosphate synthase 2, GeneName=MIPS2	IPR036291_NAD(P)-binding domain superfamily; IPR002587_Myo-inositol-1-phosphate synthase	0.0266667	3.34	0	0	0	0	0.08	2.72	3.15	4.15	0	0	0	0	0	0
Am_Tr_000816	2540	KDO47034.1_hypothetical protein CISIN_1g010460mg [Citrus sinensis]	AT2G22240.3_myo-inositol-1-phosphate synthase 2, GeneName=MIPS2	IPR002587_Myo-inositol-1-phosphate synthase; IPR036291_NAD(P)-binding domain superfamily; IPR013021_Myo-inositol-1-phosphate synthase, GAPDH-like	0	0.0966667	0	0	0	0	0	0.06	0.05	0.18	0	0	0	0	0	0
Am_Tr_000817	2558	RZC13007.1_Inositol-3-phosphate synthase isoform B [Glycine soja]	AT2G22240.3_myo-inositol-1-phosphate synthase 2, GeneName=MIPS2	IPR002587_Myo-inositol-1-phosphate synthase; IPR013021_Myo-inositol-1-phosphate synthase, GAPDH-like; IPR036291_NAD(P)-binding domain superfamily	0	4.24	0	0	0	0	0	2.35	2.64	7.73	0	0	0	0	0	0
Am_Tr_000818	2340	NP_001265952.1_inositol-3-phosphate synthase-like [Cicer arietinum] ACH87553.1 L-myo inositol-1 phosphate synthase 2 [Cicer arietinum]	AT2G22240.1_myo-inositol-1-phosphate synthase 2, GeneName=MIPS2	IPR002587_Myo-inositol-1-phosphate synthase; IPR036291_NAD(P)-binding domain superfamily; IPR013021_Myo-inositol-1-phosphate synthase, GAPDH-like	0.0466667	203.157	2.51333	0.45	0.05	0.09	0	181.5	176.92	251.05	1.51	3.75	2.28	0.27	0.6	0.48
Am_Tr_000819	1994	KAA0873694.1_hypothetical protein EYC94_25870, partial [Enterobacter hormaechei]	AT2G22240.3_myo-inositol-1-phosphate synthase 2, GeneName=MIPS2	IPR002587_Myo-inositol-1-phosphate synthase; IPR013021_Myo-inositol-1-phosphate synthase, GAPDH-like; IPR036291_NAD(P)-binding domain superfamily	0.373333	8.84667	3.20667	2.10333	0.15	0.34	0.63	5.04	13.43	8.07	3.48	2.93	3.21	2.04	3.06	1.21
Am_Tr_000820	414	.	.	.	0	0.463333	0.56	2.77333	0	0	0	0	0.55	0.84	0.8	0.46	0.42	4.9	2.94	0.48
Am_Tr_000821	3128	XP_004505487.1_serine/threonine-protein kinase EDR1 isoform X1 [Cicer arietinum] XP_027191560.1 serine/threonine-protein kinase EDR1 isoform X1 [Cicer arietinum]	AT3G58640.2_Mitogen activated protein kinase kinase kinase-like protein	.	1.4	1.51	0.523333	1.62667	1.68	0.93	1.59	0.45	2.51	1.57	0	0.17	1.4	0.75	2.91	1.22
Am_Tr_000822	4290	XP_027191705.1_serine/threonine-protein kinase EDR1 isoform X5 [Cicer arietinum]	AT3G58640.2_Mitogen activated protein kinase kinase kinase-like protein	IPR011009_Protein kinase-like domain superfamily	0.176667	0.196667	0.58	1.30333	0	0.39	0.14	0.28	0.31	0	1.02	0	0.72	0.39	1.81	1.71
Am_Tr_000823	4310	XP_004487151.1_serine/threonine-protein kinase EDR1 isoform X1 [Cicer arietinum]	AT3G58640.2_Mitogen activated protein kinase kinase kinase-like protein	IPR011009_Protein kinase-like domain superfamily; IPR001245_Serine-threonine/tyrosine-protein kinase, catalytic domain; IPR000719_Protein kinase domain	2.05667	5.85667	4.33667	9.26	1.35	3.27	1.55	4.51	6.73	6.33	3.11	4.9	5	4.93	10.38	12.47
Am_Tr_000824	3216	XP_004505487.1_serine/threonine-protein kinase EDR1 isoform X1 [Cicer arietinum] XP_027191560.1 serine/threonine-protein kinase EDR1 isoform X1 [Cicer arietinum]	AT3G58640.2_Mitogen activated protein kinase kinase kinase-like protein	IPR011009_Protein kinase-like domain superfamily; IPR001245_Serine-threonine/tyrosine-protein kinase, catalytic domain; IPR000719_Protein kinase domain	5.67667	5.39	5.34667	8.02667	7.06	7.04	2.93	3.91	6.05	6.21	3.7	6.72	5.62	6.42	6.99	10.67
Am_Tr_000825	2332	XP_004505488.1_serine/threonine-protein kinase EDR1 isoform X3 [Cicer arietinum] XP_004505489.1 serine/threonine-protein kinase EDR1 isoform X3 [Cicer arietinum]	AT3G58640.2_Mitogen activated protein kinase kinase kinase-like protein	IPR000719_Protein kinase domain; IPR011009_Protein kinase-like domain superfamily; IPR001245_Serine-threonine/tyrosine-protein kinase, catalytic domain	0.813333	1.83667	1.79	1.74333	0.18	1.34	0.92	1.53	2.03	1.95	3.12	1.2	1.05	1	2.7	1.53
Am_Tr_000826	1980	XP_004497787.1_putative G3BP-like protein [Cicer arietinum]	AT5G43960.1_Nuclear transport factor 2 (NTF2) family protein with RNA binding (RRM-RBD-RNP motifs) domain-containing protein	IPR000504_RNA recognition motif domain; IPR032710_NTF2-like domain superfamily; IPR002075_Nuclear transport factor 2 domain; IPR035979_RNA-binding domain superfamily	7.92667	14.03	12.0533	13.85	7.07	8.74	7.97	13.48	15.49	13.12	9.75	13.54	12.87	12.66	11.78	17.11
Am_Tr_000827	1346	ATY39973.1_Chalcone reductase [Astragalus membranaceus]	AT1G59960.1_NAD(P)-linked oxidoreductase superfamily protein	IPR036812_NADP-dependent oxidoreductase domain superfamily; IPR020471_Aldo-keto reductase; IPR023210_NADP-dependent oxidoreductase domain	634	229.17	217.35	110.147	616.15	868.3	417.55	143.95	252.97	290.59	108.29	264.12	279.64	63.75	148.73	117.96
Am_Tr_000828	1547	ATY39973.1_Chalcone reductase [Astragalus membranaceus]	AT1G59960.1_NAD(P)-linked oxidoreductase superfamily protein	IPR036812_NADP-dependent oxidoreductase domain superfamily; IPR020471_Aldo-keto reductase; IPR023210_NADP-dependent oxidoreductase domain	616.397	38.16	35.6267	77.22	1148.4	516.54	184.25	25.79	43.41	45.28	50.45	17.72	38.71	114.7	57.33	59.63
Am_Tr_000829	3219	TKY57375.1_Scarecrow protein 5 [Spatholobus suberectus]	AT5G48150.3_GRAS family transcription factor, GeneName=PAT1	IPR005202_Transcription factor GRAS	6.51	6.98667	2.11333	3.69667	4.91	7.07	7.55	8.47	6.66	5.83	0.7	2.67	2.97	3.78	5.03	2.28
Am_Tr_000830	2196	TKY57375.1_Scarecrow protein 5 [Spatholobus suberectus]	AT5G48150.3_GRAS family transcription factor, GeneName=PAT1	IPR005202_Transcription factor GRAS	49.6133	17.26	7.42667	13.92	46.24	58.56	44.04	14.68	20.11	16.99	6.52	8.78	6.98	7.53	22.2	12.03
Am_Tr_000831	2107	XP_027343733.1_scarecrow-like protein 21 [Abrus precatorius] XP_027343734.1 scarecrow-like protein 21 [Abrus precatorius] XP_027343735.1 scarecrow-like protein 21 [Abrus precatorius] XP_027343736.1 scarecrow-like protein 21 [Abrus precatorius]	AT5G48150.3_GRAS family transcription factor, GeneName=PAT1	IPR005202_Transcription factor GRAS	19.0167	42.42	15.2367	45.5433	11.08	24.53	21.44	49.75	38.56	38.95	10.94	13.81	20.96	61.46	26.72	48.45
Am_Tr_000832	2614	TKY57375.1_Scarecrow protein 5 [Spatholobus suberectus]	AT5G48150.3_GRAS family transcription factor, GeneName=PAT1	IPR005202_Transcription factor GRAS	1.62	0.836667	0.706667	0.75	1.45	2.07	1.34	0	0.65	1.86	0.31	1.37	0.44	0	0.6	1.65
Am_Tr_000833	3225	XP_027343733.1_scarecrow-like protein 21 [Abrus precatorius] XP_027343734.1 scarecrow-like protein 21 [Abrus precatorius] XP_027343735.1 scarecrow-like protein 21 [Abrus precatorius] XP_027343736.1 scarecrow-like protein 21 [Abrus precatorius]	AT5G48150.3_GRAS family transcription factor, GeneName=PAT1	IPR005202_Transcription factor GRAS	1.69	9.85333	2.53	10.37	1.38	1.67	2.02	15.18	6.19	8.19	1.19	3.2	3.2	16.29	6.63	8.19
Am_Tr_000834	2159	TKY57375.1_Scarecrow protein 5 [Spatholobus suberectus]	AT5G48150.3_GRAS family transcription factor, GeneName=PAT1	IPR005202_Transcription factor GRAS	70.2267	41.0967	21.4467	38.3767	66.04	107.64	37	38.86	41.04	43.39	14.11	25.77	24.46	30.67	47.7	36.76
Am_Tr_000835	3266	XP_004506678.1_scarecrow-like protein 21 [Cicer arietinum] XP_004506679.1 scarecrow-like protein 21 [Cicer arietinum]	AT1G50600.3_scarecrow-like 5, GeneName=SCL5	IPR005202_Transcription factor GRAS	9.77	27.2967	11.2633	35.43	6.15	11.22	11.94	39.7	19.64	22.55	11.22	10.88	11.69	58.02	19.48	28.79
Am_Tr_000836	2324	XP_003617966.1_scarecrow-like transcription factor PAT1 [Medicago truncatula] AET00925.1 GRAS family transcription factor [Medicago truncatula] RHN58122.1 putative transcription factor GRAS family [Medicago truncatula]	AT5G48150.3_GRAS family transcription factor, GeneName=PAT1	IPR005202_Transcription factor GRAS	17.36	13.6333	15.7533	15.4967	31.15	7.17	13.76	14.01	12.81	14.08	7.66	20.51	19.09	15.91	15.53	15.05
Am_Tr_000837	1268	XP_004512133.1_uncharacterized protein LOC101501661 [Cicer arietinum]	AT5G66230.1_Chalcone-flavanone isomerase family protein	.	0.196667	0.85	2.13	1.00667	0.09	0.28	0.22	1.15	0.6	0.8	3.12	1.72	1.55	0.91	0.65	1.46
Am_Tr_000838	234	.	.	.	0	0	1.66333	0.903333	0	0	0	0	0	0	2.34	0	2.65	2.71	0	0
Am_Tr_000839	542	.	.	.	0.283333	0.436667	0.706667	0.883333	0	0.6	0.25	0	1.31	0	0	1.11	1.01	0.59	0.6	1.46
Am_Tr_000840	1837	.	.	.	0.116667	0.97	0.5	1.11667	0.12	0.18	0.05	1.03	1.1	0.78	0.1	0.5	0.9	0.83	1.09	1.43
Am_Tr_000841	1775	XP_003616715.1_uncharacterized protein LOC11418953 [Medicago truncatula] AES99673.1 hypothetical protein MTR_5g083500 [Medicago truncatula] RHN57196.1 hypothetical protein MtrunA17_Chr5g0437761 [Medicago truncatula]	AT2G40390.1_neuronal PAS domain protein	.	0.88	6.34	41.7733	2.66667	0.31	0.84	1.49	3.55	5.26	10.21	31.16	50.33	43.83	0.89	5.29	1.82
Am_Tr_000842	2610	XP_027333668.1_uncharacterized protein LOC113848381 [Abrus precatorius]	AT2G40390.1_neuronal PAS domain protein	.	0.06	0.333333	1.75333	0.213333	0	0.18	0	0.45	0.3	0.25	1.25	1.72	2.29	0.18	0.28	0.18
Am_Tr_000843	2048	XP_004500524.1_uncharacterized protein LOC101511037 [Cicer arietinum]	AT2G40390.1_neuronal PAS domain protein	.	0.0833333	0.406667	39.5667	0.79	0	0.21	0.04	0.1	1.03	0.09	5.98	62.45	50.27	1.36	0.75	0.26
Am_Tr_000844	931	AFK40742.1_unknown [Lotus japonicus]	AT5G47650.1_nudix hydrolase homolog 2, GeneName=NUDT2	IPR000086_NUDIX hydrolase domain; IPR015797_NUDIX hydrolase-like domain superfamily; IPR040618_Pre-nudix hydrolase domain; IPR003293_Nudix hydrolase 6-like	0.253333	0	0	0.0933333	0	0.76	0	0	0	0	0	0	0	0	0.28	0
Am_Tr_000845	1936	XP_004507591.1_nudix hydrolase 2-like isoform X2 [Cicer arietinum]	AT5G47650.1_nudix hydrolase homolog 2, GeneName=NUDT2	.	0	0	0.103333	0	0	0	0	0	0	0	0	0	0.31	0	0	0
Am_Tr_000846	1164	XP_004507591.1_nudix hydrolase 2-like isoform X2 [Cicer arietinum]	AT5G47650.1_nudix hydrolase homolog 2, GeneName=NUDT2	IPR015797_NUDIX hydrolase-like domain superfamily	0.306667	0	0.0966667	0	0.92	0	0	0	0	0	0	0	0.29	0	0	0
Am_Tr_000847	1258	XP_004507591.1_nudix hydrolase 2-like isoform X2 [Cicer arietinum]	AT5G47650.1_nudix hydrolase homolog 2, GeneName=NUDT2	IPR015797_NUDIX hydrolase-like domain superfamily	0.0933333	0.71	1.45667	0	0	0	0.28	0	0.47	1.66	2.39	0	1.98	0	0	0
Am_Tr_000848	1606	XP_029129806.1_nudix hydrolase 2 isoform X2 [Cajanus cajan]	AT5G47650.1_nudix hydrolase homolog 2, GeneName=NUDT2	IPR015797_NUDIX hydrolase-like domain superfamily; IPR003293_Nudix hydrolase 6-like; IPR000086_NUDIX hydrolase domain; IPR040618_Pre-nudix hydrolase domain	1.79667	9.85	8.10667	8.16333	2.2	1.69	1.5	13.23	7.49	8.83	6.49	8.14	9.69	8.12	7.19	9.18
Am_Tr_000849	1952	XP_004507591.1_nudix hydrolase 2-like isoform X2 [Cicer arietinum]	AT5G47650.1_nudix hydrolase homolog 2, GeneName=NUDT2	IPR003293_Nudix hydrolase 6-like; IPR040618_Pre-nudix hydrolase domain	0.11	1.30333	0.253333	0.366667	0.33	0	0	1.33	1.96	0.62	0	0	0.76	0.71	0.03	0.36
Am_Tr_000850	1700	XP_004507591.1_nudix hydrolase 2-like isoform X2 [Cicer arietinum]	AT5G47650.1_nudix hydrolase homolog 2, GeneName=NUDT2	IPR003293_Nudix hydrolase 6-like; IPR040618_Pre-nudix hydrolase domain	1.96667	3.05333	2.22667	2.02333	1.07	3.31	1.52	4.25	2.59	2.32	1.89	4.13	0.66	2.15	3.16	0.76
Am_Tr_000851	1684	XP_004507591.1_nudix hydrolase 2-like isoform X2 [Cicer arietinum]	AT5G47650.1_nudix hydrolase homolog 2, GeneName=NUDT2	IPR015797_NUDIX hydrolase-like domain superfamily	0.103333	0.0466667	0	0.22	0	0.31	0	0.14	0	0	0	0	0	0	0.66	0
Am_Tr_000852	583	GAU38755.1_hypothetical protein TSUD_158870 [Trifolium subterraneum]	AT5G17270.2_Protein prenylyltransferase superfamily protein	.	0	0	0	0.433333	0	0	0	0	0	0	0	0	0	0	1.3	0
Am_Tr_000853	1025	AFK40742.1_unknown [Lotus japonicus]	AT4G12720.5_MutT/nudix family protein, GeneName=NUDT7	IPR003293_Nudix hydrolase 6-like; IPR040618_Pre-nudix hydrolase domain	0.04	0.52	0	0.366667	0	0.12	0	0	1.56	0	0	0	0	0	0	1.1
Am_Tr_000854	1009	GAU38755.1_hypothetical protein TSUD_158870 [Trifolium subterraneum]	AT5G17270.2_Protein prenylyltransferase superfamily protein	.	0	1.47333	1.11333	0.353333	0	0	0	0	1.47	2.95	0	1.37	1.97	0	0	1.06
Am_Tr_000855	1858	XP_029129806.1_nudix hydrolase 2 isoform X2 [Cajanus cajan]	AT5G47650.1_nudix hydrolase homolog 2, GeneName=NUDT2	IPR040618_Pre-nudix hydrolase domain; IPR003293_Nudix hydrolase 6-like; IPR015797_NUDIX hydrolase-like domain superfamily; IPR000086_NUDIX hydrolase domain	0.123333	0	1.32333	0.146667	0	0.37	0	0	0	0	1.75	2.22	0	0	0.44	0
Am_Tr_000856	489	MCH90172.1_nudix hydrolase 2-like [Trifolium medium]	AT5G47650.1_nudix hydrolase homolog 2, GeneName=NUDT2	.	0	0.576667	0	1.27	0	0	0	0	1.09	0.64	0	0	0	0	1.55	2.26
Am_Tr_000857	3568	PNY00925.1_putative serine threonine-protein kinase [Trifolium pratense]	AT1G66880.3_Protein kinase superfamily protein	IPR011009_Protein kinase-like domain superfamily; IPR000719_Protein kinase domain	14.61	13.0867	2.65	8.96333	8.58	12.94	22.31	15.31	11.6	12.35	1.49	2.67	3.79	13.11	6.31	7.47
Am_Tr_000858	1654	XP_004498543.1_BURP domain protein RD22 [Cicer arietinum]	AT5G25610.1_BURP domain-containing protein, GeneName=RD22	IPR004873_BURP domain	0	2018.94	302.85	525.09	0	0	0	2414.04	1582.01	2060.78	135.14	325.89	447.52	719.18	588.55	267.54
Am_Tr_000859	3446	XP_004498543.1_BURP domain protein RD22 [Cicer arietinum]	AT5G25610.1_BURP domain-containing protein, GeneName=RD22	IPR032872_Wall-associated receptor kinase, C-terminal	2.82667	12.62	2.46333	2.88333	0.65	3.89	3.94	7.75	15.01	15.1	0.86	2.51	4.02	4.07	2.38	2.2
Am_Tr_000860	2882	RHN47269.1_putative protein kinase RLK-Pelle-WAK-LRK10L-1 family [Medicago truncatula]	AT5G38210.2_Protein kinase family protein	IPR032872_Wall-associated receptor kinase, C-terminal; IPR011009_Protein kinase-like domain superfamily; IPR025287_Wall-associated receptor kinase, galacturonan-binding domain; IPR000719_Protein kinase domain	111.383	45.47	6.63333	39.3933	19.18	179.91	135.06	45.83	39.83	50.75	3.66	5.94	10.3	51.89	26.1	40.19
Am_Tr_000861	1550	XP_004486349.1_nudix hydrolase 2-like isoform X1 [Cicer arietinum]	AT5G47650.1_nudix hydrolase homolog 2, GeneName=NUDT2	IPR015797_NUDIX hydrolase-like domain superfamily; IPR003293_Nudix hydrolase 6-like; IPR000086_NUDIX hydrolase domain; IPR040618_Pre-nudix hydrolase domain	1.94333	11.8967	9.51	7.85667	1.05	4.37	0.41	12.6	8.57	14.52	7.4	9.62	11.51	6.26	7.3	10.01
Am_Tr_000862	2090	XP_004486349.1_nudix hydrolase 2-like isoform X1 [Cicer arietinum]	AT4G25434.8_nudix hydrolase homolog 10, GeneName=NUDT10	IPR000086_NUDIX hydrolase domain; IPR040618_Pre-nudix hydrolase domain; IPR015797_NUDIX hydrolase-like domain superfamily; IPR003293_Nudix hydrolase 6-like	1.14	7.06667	4.56667	4.37333	0.8	1.88	0.74	7.53	7.1	6.57	4.16	5.26	4.28	6.48	3.48	3.16
Am_Tr_000863	533	.	.	.	0	0	0.18	0.7	0	0	0	0	0	0	0.25	0.29	0	1.2	0	0.9
Am_Tr_000864	6401	XP_004492482.1_ethylene-overproduction protein 1 [Cicer arietinum]	AT3G51770.2_tetratricopeptide repeat (TPR)-containing protein, GeneName=ETO1	IPR011333_SKP1/BTB/POZ domain superfamily; IPR011990_Tetratricopeptide-like helical domain superfamily	0.336667	3.22667	1.66	1.56333	0.24	0.48	0.29	2.93	3.01	3.74	0.63	1.77	2.58	1.34	1.74	1.61
Am_Tr_000865	5292	RDX81799.1_Ethylene-overproduction protein 1, partial [Mucuna pruriens]	AT3G51770.2_tetratricopeptide repeat (TPR)-containing protein, GeneName=ETO1	IPR011990_Tetratricopeptide-like helical domain superfamily; IPR019734_Tetratricopeptide repeat; IPR011333_SKP1/BTB/POZ domain superfamily	0.966667	5.27	7.14333	5.52667	0.77	1.72	0.41	4.53	5.74	5.54	6.22	9.02	6.19	4.5	6.04	6.04
Am_Tr_000866	3679	XP_004506795.1_ethylene-overproduction protein 1-like [Cicer arietinum]	AT3G51770.2_tetratricopeptide repeat (TPR)-containing protein, GeneName=ETO1	IPR011990_Tetratricopeptide-like helical domain superfamily; IPR011333_SKP1/BTB/POZ domain superfamily; IPR019734_Tetratricopeptide repeat	6.70667	13.08	34.6333	9.71667	5.08	7.11	7.93	12.49	12.58	14.17	27.21	44.19	32.5	8.33	9.2	11.62
Am_Tr_000867	2771	XP_013455436.1_purple acid phosphatase [Medicago truncatula] AAX20028.1 purple acid phosphatase [Medicago truncatula] KEH29467.1 purple acid phosphatase superfamily protein [Medicago truncatula] RHN59888.1 Purple acid phosphatase [Medicago truncatula]	AT2G16430.2_purple acid phosphatase 10, GeneName=PAP10	IPR025733_Iron/zinc purple acid phosphatase-like C-terminal domain; IPR015914_Purple acid phosphatase, N-terminal; IPR004843_Calcineurin-like phosphoesterase domain, ApaH type; IPR029052_Metallo-dependent phosphatase-like; IPR008963_Purple acid phosphatase-like, N-terminal	2.97667	9.29667	3.97333	10.76	5.24	2.39	1.3	9.74	11.58	6.57	1.87	4.14	5.91	9.21	13.85	9.22
Am_Tr_000868	2335	XP_013455436.1_purple acid phosphatase [Medicago truncatula] AAX20028.1 purple acid phosphatase [Medicago truncatula] KEH29467.1 purple acid phosphatase superfamily protein [Medicago truncatula] RHN59888.1 Purple acid phosphatase [Medicago truncatula]	AT2G16430.2_purple acid phosphatase 10, GeneName=PAP10	IPR008963_Purple acid phosphatase-like, N-terminal; IPR025733_Iron/zinc purple acid phosphatase-like C-terminal domain; IPR004843_Calcineurin-like phosphoesterase domain, ApaH type; IPR015914_Purple acid phosphatase, N-terminal; IPR029052_Metallo-dependent phosphatase-like	10.16	35.9367	23.7967	22.1033	6.14	16.37	7.97	41.6	30.68	35.53	20.58	24.25	26.56	22.77	14.24	29.3
Am_Tr_000869	1950	XP_004487490.1_rho GTPase-activating protein 5 [Cicer arietinum]	AT5G22400.1_Rho GTPase activating protein with PAK-box/P21-Rho-binding domain-containing protein	IPR000198_Rho GTPase-activating protein domain; IPR008936_Rho GTPase activation protein; IPR000095_CRIB domain	0	0.49	0.406667	0.83	0	0	0	0	0.99	0.48	0.13	0.82	0.27	1.51	0.31	0.67
Am_Tr_000870	1313	XP_004487490.1_rho GTPase-activating protein 5 [Cicer arietinum]	AT5G22400.1_Rho GTPase activating protein with PAK-box/P21-Rho-binding domain-containing protein	IPR008936_Rho GTPase activation protein; IPR000198_Rho GTPase-activating protein domain	0.116667	0.223333	0.436667	0.483333	0.1	0.18	0.07	0.42	0.25	0	0.65	0.66	0	0.24	1.21	0
Am_Tr_000871	1924	XP_004487490.1_rho GTPase-activating protein 5 [Cicer arietinum]	AT5G22400.1_Rho GTPase activating protein with PAK-box/P21-Rho-binding domain-containing protein	IPR000198_Rho GTPase-activating protein domain; IPR008936_Rho GTPase activation protein	0	0	0.1	0	0	0	0	0	0	0	0	0	0.3	0	0	0
Am_Tr_000872	368	GAU22387.1_hypothetical protein TSUD_107160 [Trifolium subterraneum]	AT5G22400.1_Rho GTPase activating protein with PAK-box/P21-Rho-binding domain-containing protein	.	0.176667	0	0.273333	0	0.53	0	0	0	0	0	0.68	0.14	0	0	0	0
Am_Tr_000873	300	PNX86619.1_rho GTPase-activating protein 24-like [Trifolium pratense]	AT4G03100.1_Rho GTPase activating protein with PAK-box/P21-Rho-binding domain-containing protein	.	0	0.666667	0.65	0.703333	0	0	0	1.06	0	0.94	0	0	1.95	1.06	0	1.05
Am_Tr_000874	273	PNX86619.1_rho GTPase-activating protein 24-like [Trifolium pratense]	AT1G08340.1_Rho GTPase activating protein with PAK-box/P21-Rho-binding domain-containing protein	.	0	1.17333	0	0	0	0	0	0	3.52	0	0	0	0	0	0	0
Am_Tr_000875	1766	TKY49386.1_Transcription factor JUNGBRUNNEN 1 [Spatholobus suberectus]	AT2G43000.1_NAC domain containing protein 42, GeneName=NAC042	IPR003441_NAC domain; IPR036093_NAC domain superfamily	0	0.993333	0.08	0.326667	0	0	0	0.78	1.12	1.08	0.16	0	0.08	0.27	0	0.71
Am_Tr_000876	1262	XP_027356420.1_transcription factor JUNGBRUNNEN 1-like [Abrus precatorius]	AT2G43000.1_NAC domain containing protein 42, GeneName=NAC042	IPR003441_NAC domain; IPR036093_NAC domain superfamily	0.37	17.48	0.69	4.52	0	0.74	0.37	14.75	18.62	19.07	0.23	0.95	0.89	4.64	2.06	6.86
Am_Tr_000877	1278	XP_027368132.1_transcription factor JUNGBRUNNEN 1 [Abrus precatorius]	AT2G43000.1_NAC domain containing protein 42, GeneName=NAC042	IPR036093_NAC domain superfamily; IPR003441_NAC domain	1.95667	3.56667	2.42667	3.53	0.09	1.91	3.87	3.85	1.88	4.97	2.48	2.04	2.76	5.05	1.01	4.53
Am_Tr_000878	282	.	.	.	40.36	3.36333	4.51333	14.3033	12.34	43.62	65.12	7.81	0	2.28	0	7.54	6	19.31	15.94	7.66
Am_Tr_000879	2777	XP_039683462.1_putative uncharacterized protein DDB_G0290521 [Medicago truncatula]	AT2G46630.1_serine/arginine repetitive matrix protein	.	8.66667	6.88667	9.15333	10.46	15.33	7.21	3.46	10.22	4.61	5.83	12.27	8.72	6.47	14.9	6.39	10.09
Am_Tr_000880	2021	QDX01726.1_NAC domain-containing protein NAC87 [Medicago falcata]	AT2G46770.1_NAC (No Apical Meristem) domain transcriptional regulator superfamily protein, GeneName=NST1	IPR003441_NAC domain; IPR036093_NAC domain superfamily	0.203333	0.106667	0.24	1.35667	0.61	0	0	0	0.16	0.16	0.14	0.58	0	2.21	1.4	0.46
Am_Tr_000881	1667	QDX01726.1_NAC domain-containing protein NAC87 [Medicago falcata]	AT2G46770.1_NAC (No Apical Meristem) domain transcriptional regulator superfamily protein, GeneName=NST1	IPR036093_NAC domain superfamily; IPR003441_NAC domain	10.4067	1.29667	1.59333	14.8167	20.45	7.04	3.73	1.22	2.18	0.49	1.97	1.58	1.23	17.85	15.75	10.85
Am_Tr_000882	2102	XP_017413977.1_PREDICTED: NAC domain-containing protein 30 isoform X2 [Vigna angularis] BAT94409.1 hypothetical protein VIGAN_08100800 [Vigna angularis var. angularis]	AT1G71930.2_vascular related NAC-domain protein 7, GeneName=VND7	IPR003441_NAC domain; IPR036093_NAC domain superfamily	3.08	1.27667	0.493333	1.72	5.31	1.27	2.66	2.52	0.36	0.95	0.9	0.58	0	1.76	1.27	2.13
Am_Tr_000883	552	.	.	.	0	0	0	0.11	0	0	0	0	0	0	0	0	0	0	0	0.33
Am_Tr_000884	1916	XP_017413977.1_PREDICTED: NAC domain-containing protein 30 isoform X2 [Vigna angularis] BAT94409.1 hypothetical protein VIGAN_08100800 [Vigna angularis var. angularis]	AT1G71930.2_vascular related NAC-domain protein 7, GeneName=VND7	IPR036093_NAC domain superfamily; IPR003441_NAC domain	0.746667	0.443333	0	0.893333	0	0.5	1.74	0	1	0.33	0	0	0	0	2.37	0.31
Am_Tr_000885	1841	XP_017413977.1_PREDICTED: NAC domain-containing protein 30 isoform X2 [Vigna angularis] BAT94409.1 hypothetical protein VIGAN_08100800 [Vigna angularis var. angularis]	AT1G71930.2_vascular related NAC-domain protein 7, GeneName=VND7	IPR003441_NAC domain; IPR036093_NAC domain superfamily	6.42667	3.09333	2.45667	4.05667	10.21	4.95	4.12	3.47	2.98	2.83	1.71	3.06	2.6	7.28	1.29	3.6
Am_Tr_000886	1634	XP_004507694.1_uncharacterized protein LOC101501851 [Cicer arietinum]	.	.	0.44	0.34	0.133333	0.41	0.41	0.2	0.71	0.33	0.22	0.47	0.11	0	0.29	0.54	0.55	0.14
Am_Tr_000887	2263	RZB84360.1_putative E3 ubiquitin-protein ligase ARI7 isoform B [Glycine soja]	AT2G31510.2_IBR domain-containing protein, GeneName=ARI7	IPR002867_IBR domain	10.86	8.10667	4.01667	7.51	15.4	8.45	8.73	8.16	8.13	8.03	0	5.53	6.52	4.26	9.24	9.03
Am_Tr_000888	3550	XP_027353689.1_probable E3 ubiquitin-protein ligase ARI7 isoform X1 [Abrus precatorius]	AT2G31510.1_IBR domain-containing protein, GeneName=ARI7	.	6.65	1.73333	2.35667	2.05	15.64	2.87	1.44	2.37	1.36	1.47	1.39	2.93	2.75	1.86	2.15	2.14
Am_Tr_000889	4292	XP_027353690.1_probable E3 ubiquitin-protein ligase ARI7 isoform X2 [Abrus precatorius]	AT1G65430.1_IBR domain-containing protein, GeneName=ARI8	IPR002867_IBR domain	0.386667	0.476667	0.123333	0.173333	0.79	0	0.37	0.31	0.81	0.31	0.14	0	0.23	0	0.39	0.13
Am_Tr_000890	2678	RZB84360.1_putative E3 ubiquitin-protein ligase ARI7 isoform B [Glycine soja]	AT2G31510.2_IBR domain-containing protein, GeneName=ARI7	IPR002867_IBR domain	0.16	0.136667	0	0.08	0.48	0	0	0.41	0	0	0	0	0	0	0	0.24
Am_Tr_000891	925	QCD87292.1_ariadne-1 [Vigna unguiculata]	AT2G31510.3_IBR domain-containing protein, GeneName=ARI7	.	0	0.203333	0	0.103333	0	0	0	0.29	0.32	0	0	0	0	0.02	0.29	0
Am_Tr_000892	2781	RZB84360.1_putative E3 ubiquitin-protein ligase ARI7 isoform B [Glycine soja]	AT2G31510.2_IBR domain-containing protein, GeneName=ARI7	IPR002867_IBR domain	0.753333	0.153333	0.523333	0.576667	0.34	1.66	0.26	0	0.3	0.16	0	0.37	1.2	0.51	1.16	0.06
Am_Tr_000893	4150	XP_045827265.1_probable E3 ubiquitin-protein ligase ARI7 [Trifolium pratense]	AT2G31510.1_IBR domain-containing protein, GeneName=ARI7	IPR002867_IBR domain	0.563333	0.8	0.383333	0.736667	0.53	0.91	0.25	1.22	0.93	0.25	0.3	0.3	0.55	0.33	0.67	1.21
Am_Tr_000894	4342	XP_045827265.1_probable E3 ubiquitin-protein ligase ARI7 [Trifolium pratense]	AT2G31510.2_IBR domain-containing protein, GeneName=ARI7	.	0.263333	0.28	0.176667	0.143333	0.28	0.49	0.02	0.14	0.03	0.67	0.12	0	0.41	0.06	0.04	0.33
Am_Tr_000895	4247	XP_045827265.1_probable E3 ubiquitin-protein ligase ARI7 [Trifolium pratense]	AT2G31510.2_IBR domain-containing protein, GeneName=ARI7	.	0.00333333	0	0	0	0.01	0	0	0	0	0	0	0	0	0	0	0
Am_Tr_000896	3318	XP_027353689.1_probable E3 ubiquitin-protein ligase ARI7 isoform X1 [Abrus precatorius]	AT1G65430.1_IBR domain-containing protein, GeneName=ARI8	IPR001876_Zinc finger, RanBP2-type; IPR045840_Ariadne domain; IPR002867_IBR domain; IPR036443_Zinc finger, RanBP2-type superfamily	13.9633	7.43333	5.96333	7.23667	18.09	11.1	12.7	7.02	6.43	8.85	4.75	7.17	5.97	5.45	8.58	7.68
Am_Tr_000897	4619	XP_027353690.1_probable E3 ubiquitin-protein ligase ARI7 isoform X2 [Abrus precatorius]	AT1G65430.1_IBR domain-containing protein, GeneName=ARI8	.	0.12	0.15	0.28	0	0	0.36	0	0	0	0.45	0.46	0.38	0	0	0	0
Am_Tr_000898	3769	RZB84360.1_putative E3 ubiquitin-protein ligase ARI7 isoform B [Glycine soja]	AT2G31510.2_IBR domain-containing protein, GeneName=ARI7	IPR002867_IBR domain; IPR045840_Ariadne domain	0.25	0.0466667	0.406667	0.206667	0.16	0.46	0.13	0	0	0.14	0.31	0.77	0.14	0	0.32	0.3
Am_Tr_000899	3223	XP_027353689.1_probable E3 ubiquitin-protein ligase ARI7 isoform X1 [Abrus precatorius]	AT2G31510.1_IBR domain-containing protein, GeneName=ARI7	IPR002867_IBR domain; IPR045840_Ariadne domain	84.7867	34.8833	32.1767	36.3967	123.78	58.7	71.88	29	35.63	40.02	26.14	36.58	33.81	30.83	39.57	38.79
Am_Tr_000900	510	KAF7805362.1_putative E3 ubiquitin-protein ligase ARI7 [Senna tora]	AT2G31510.3_IBR domain-containing protein, GeneName=ARI7	.	33.7733	17.04	16.6233	16.6	53.79	16.57	30.96	17.35	19.39	14.38	10.08	18.32	21.47	20.34	13.27	16.19
Am_Tr_000901	4096	RZB84360.1_putative E3 ubiquitin-protein ligase ARI7 isoform B [Glycine soja]	AT2G31510.2_IBR domain-containing protein, GeneName=ARI7	IPR002867_IBR domain	0.07	0.0366667	0.256667	0.19	0	0	0.21	0	0	0.11	0.21	0.17	0.39	0.2	0	0.37
Am_Tr_000902	3920	XP_045827265.1_probable E3 ubiquitin-protein ligase ARI7 [Trifolium pratense]	AT2G31510.2_IBR domain-containing protein, GeneName=ARI7	IPR002867_IBR domain	0.03	0.25	0	0	0.09	0	0	0.49	0.26	0	0	0	0	0	0	0
Am_Tr_000903	3645	XP_027353689.1_probable E3 ubiquitin-protein ligase ARI7 isoform X1 [Abrus precatorius]	AT1G65430.1_IBR domain-containing protein, GeneName=ARI8	IPR045840_Ariadne domain; IPR036443_Zinc finger, RanBP2-type superfamily; IPR002867_IBR domain; IPR001876_Zinc finger, RanBP2-type	1.13667	0.426667	0.353333	0.373333	2.75	0.6	0.06	0.65	0.11	0.52	0.17	0.76	0.13	0.34	0.37	0.41
Am_Tr_000904	4477	XP_045827265.1_probable E3 ubiquitin-protein ligase ARI7 [Trifolium pratense]	AT2G31510.1_IBR domain-containing protein, GeneName=ARI7	.	0.0266667	0.02	0.03	0.01	0	0.07	0.01	0.05	0.01	0	0	0	0.09	0.01	0	0.02
Am_Tr_000905	3681	XP_003543557.1_probable E3 ubiquitin-protein ligase ARI7 [Glycine max] XP_028190392.1 probable E3 ubiquitin-protein ligase ARI7 [Glycine soja] KAG4978817.1 hypothetical protein JHK86_038291 [Glycine max] KAH1104838.1 hypothetical protein GYH30_038262 [Glycine max] KAH1219221.1 putative E3 ubiquitin-protein ligase ARI7 [Glycine max] KRH23186.1 hypothetical protein GLYMA_13G343300v4 [Glycine max] R…	AT2G31510.1_IBR domain-containing protein, GeneName=ARI7	IPR036443_Zinc finger, RanBP2-type superfamily; IPR045840_Ariadne domain; IPR002867_IBR domain; IPR001876_Zinc finger, RanBP2-type	24.3067	20.64	24.0533	23.0867	27.05	24.18	21.69	16.71	22.18	23.03	17.8	28.81	25.55	22.41	22.46	24.39
Am_Tr_000906	4015	XP_045827265.1_probable E3 ubiquitin-protein ligase ARI7 [Trifolium pratense]	AT2G31510.2_IBR domain-containing protein, GeneName=ARI7	IPR002867_IBR domain	3.19333	3.76667	3.65333	3.67	5.56	1.45	2.57	3.75	2.78	4.77	3.15	3.84	3.97	3.8	3.53	3.68
Am_Tr_000907	437	.	.	.	0	1.51	0.663333	0	0	0	0	0.84	0	3.69	0	1.99	0	0	0	0
Am_Tr_000908	578	.	.	.	0	7.41	4.78333	0	0	0	0	4.12	8.83	9.28	5.29	4.04	5.02	0	0	0
Am_Tr_000909	666	.	.	.	0.133333	0.203333	0.236667	0.143333	0	0.22	0.18	0	0.24	0.37	0.53	0	0.18	0.21	0.22	0
Am_Tr_000910	231	.	.	.	0	0	0	0	0	0	0	0	0	0	0	0	0	0	0	0
Am_Tr_000911	213	.	.	.	0	0	0	0	0	0	0	0	0	0	0	0	0	0	0	0
Am_Tr_000912	244	.	.	.	0	0	0	0	0	0	0	0	0	0	0	0	0	0	0	0
Am_Tr_000913	334	.	.	.	0.556667	0	0	0.26	0	1.67	0	0	0	0	0	0	0	0	0	0.78
Am_Tr_000914	1466	XP_004503559.1_26S proteasome regulatory subunit RPN13 [Cicer arietinum]	AT2G26590.4_regulatory particle non-ATPase 13, GeneName=RPN13	IPR032368_RPN13, DEUBAD domain; IPR044868_Rpn13/ADRM1, Pru domain	0.713333	0.886667	1.08667	1.17	0.34	1.05	0.75	0.36	0.82	1.48	1.74	0.99	0.53	2.08	0.73	0.7
Am_Tr_000915	1166	XP_018504192.1_PREDICTED: 26S proteasome regulatory subunit RPN13-like [Pyrus x bretschneideri]	.	.	0.526667	1.15333	1.23333	2.22	1.06	0.43	0.09	1.43	1.12	0.91	1.94	1.22	0.54	2.01	2.52	2.13
Am_Tr_000916	1368	XP_004503559.1_26S proteasome regulatory subunit RPN13 [Cicer arietinum]	AT2G26590.2_regulatory particle non-ATPase 13, GeneName=RPN13	IPR032368_RPN13, DEUBAD domain; IPR044868_Rpn13/ADRM1, Pru domain	31.74	30.35	31.0133	35.4433	31.71	28.32	35.19	28.76	32.35	29.94	37.12	28	27.92	32.17	35.22	38.94
Am_Tr_000917	850	XP_002903192.1_40S ribosomal protein S9-1 [Phytophthora infestans T30-4] XP_008911307.1 ribosomal protein S4 [Phytophthora parasitica INRA-310] ETI37949.1 ribosomal protein S4 [Phytophthora parasitica P1569] ETK78146.1 ribosomal protein S4 [Phytophthora parasitica] ETO66726.1 ribosomal protein S4 [Phytophthora parasitica P1976] ETP07838.1 ribosomal protein S4 [Phytophthora parasitica CJ01A1] ETP3…	AT5G39850.1_Ribosomal protein S4	IPR002942_RNA-binding S4 domain; IPR001912_Ribosomal protein S4/S9, N-terminal; IPR005710_Ribosomal protein S4/S9, eukaryotic/archaeal	7.48333	0	0	0	5.36	4.74	12.35	0	0	0	0	0	0	0	0	0
Am_Tr_000918	210	RMY31362.1_hypothetical protein D0865_15021 [Hortaea werneckii] RMY31982.1 hypothetical protein D0865_14851 [Hortaea werneckii] RMY50665.1 hypothetical protein D0864_14526 [Hortaea werneckii] RMY75600.1 hypothetical protein D0864_09802 [Hortaea werneckii]	AT5G15200.1_Ribosomal protein S4	.	0	0	0	0	0	0	0	0	0	0	0	0	0	0	0	0
Am_Tr_000919	5569	XP_004491335.1_uncharacterized protein LOC101508823 isoform X2 [Cicer arietinum]	AT1G29820.1_Magnesium transporter CorA-like family protein	IPR045863_CorA, transmembrane region	0.0566667	1.05	0.0433333	0.326667	0	0	0.17	3.15	0	0	0.12	0	0.01	0	0.98	0
Am_Tr_000920	4758	XP_004491335.1_uncharacterized protein LOC101508823 isoform X2 [Cicer arietinum]	AT1G29820.1_Magnesium transporter CorA-like family protein	IPR045863_CorA, transmembrane region	0.12	1.75333	0.69	1.46333	0.13	0.23	0	1.57	1.97	1.72	0	0.85	1.22	2.59	1.19	0.61
Am_Tr_000921	4645	XP_004491335.1_uncharacterized protein LOC101508823 isoform X2 [Cicer arietinum]	AT1G29820.1_Magnesium transporter CorA-like family protein	IPR045863_CorA, transmembrane region; IPR002523_Mg2+ transporter protein, CorA-like/Zinc transport protein ZntB	0.426667	3.05667	0.943333	1.23333	0.3	0.78	0.2	4.79	2.93	1.45	0.81	1.33	0.69	0	1.81	1.89
Am_Tr_000922	2742	XP_003617437.2_uncharacterized protein LOC11437053 isoform X1 [Medicago truncatula] AET00396.2 magnesium transporter CorA family protein [Medicago truncatula] RHN57697.1 putative Mg2+ transporter protein, CorA-like/Zinc transport protein ZntB [Medicago truncatula]	AT1G29820.1_Magnesium transporter CorA-like family protein	.	0.18	0.773333	0.183333	1.17333	0.16	0.38	0	2.32	0	0	0	0.55	0	1.85	1.63	0.04
Am_Tr_000923	5956	XP_004491335.1_uncharacterized protein LOC101508823 isoform X2 [Cicer arietinum]	AT1G29820.1_Magnesium transporter CorA-like family protein	.	0	0.993333	0.71	0.503333	0	0	0	0	2.98	0	0.47	0.91	0.75	0.74	0	0.77
Am_Tr_000924	2606	XP_003617437.2_uncharacterized protein LOC11437053 isoform X1 [Medicago truncatula] AET00396.2 magnesium transporter CorA family protein [Medicago truncatula] RHN57697.1 putative Mg2+ transporter protein, CorA-like/Zinc transport protein ZntB [Medicago truncatula]	AT1G29820.1_Magnesium transporter CorA-like family protein	IPR045863_CorA, transmembrane region; IPR002523_Mg2+ transporter protein, CorA-like/Zinc transport protein ZntB	0	0	0	0	0	0	0	0	0	0	0	0	0	0	0	0
Am_Tr_000925	3279	XP_003617437.2_uncharacterized protein LOC11437053 isoform X1 [Medicago truncatula] AET00396.2 magnesium transporter CorA family protein [Medicago truncatula] RHN57697.1 putative Mg2+ transporter protein, CorA-like/Zinc transport protein ZntB [Medicago truncatula]	AT1G29820.1_Magnesium transporter CorA-like family protein	IPR045863_CorA, transmembrane region	0.186667	0.996667	0.403333	0.593333	0.25	0.31	0	0.19	0	2.8	0.21	0.52	0.48	0.68	0.68	0.42
Am_Tr_000926	5145	XP_004491335.1_uncharacterized protein LOC101508823 isoform X2 [Cicer arietinum]	AT1G29820.1_Magnesium transporter CorA-like family protein	.	0.00666667	0.793333	0.0733333	0.35	0.02	0	0	0	0.42	1.96	0	0.2	0.02	0	0.14	0.91
Am_Tr_000927	2355	XP_003617437.2_uncharacterized protein LOC11437053 isoform X1 [Medicago truncatula] AET00396.2 magnesium transporter CorA family protein [Medicago truncatula] RHN57697.1 putative Mg2+ transporter protein, CorA-like/Zinc transport protein ZntB [Medicago truncatula]	AT1G29820.1_Magnesium transporter CorA-like family protein	IPR045863_CorA, transmembrane region; IPR002523_Mg2+ transporter protein, CorA-like/Zinc transport protein ZntB	4.57	16.3433	10.8833	17.0067	4.2	6.84	2.67	15.72	15.67	17.64	7.17	12.58	12.9	16.61	17.06	17.35
Am_Tr_000928	5032	XP_004491335.1_uncharacterized protein LOC101508823 isoform X2 [Cicer arietinum]	AT1G29820.1_Magnesium transporter CorA-like family protein	.	0.04	1.04	0.0833333	0.0566667	0.12	0	0	0.35	0.56	2.21	0	0.25	0	0	0.17	0
Am_Tr_000929	1545	XP_003625101.1_uncharacterized protein LOC11416135 isoform X2 [Medicago truncatula] AES81319.1 hypothetical protein MTR_7g090930 [Medicago truncatula] AFK46067.1 unknown [Medicago truncatula] RHN47813.1 hypothetical protein MtrunA17_Chr7g0257071 [Medicago truncatula]	AT5G04000.1_hypothetical protein	.	0.583333	1.04333	0.566667	0.463333	1.25	0.5	0	0	3.13	0	1.7	0	0	0.48	0.91	0
Am_Tr_000930	2913	XP_003625101.1_uncharacterized protein LOC11416135 isoform X2 [Medicago truncatula] AES81319.1 hypothetical protein MTR_7g090930 [Medicago truncatula] AFK46067.1 unknown [Medicago truncatula] RHN47813.1 hypothetical protein MtrunA17_Chr7g0257071 [Medicago truncatula]	AT5G04000.1_hypothetical protein	.	1.74333	4.41	2.38	4.12	1.75	2.75	0.73	6.69	3.1	3.44	1.74	3.17	2.23	5.58	3.74	3.04
Am_Tr_000931	3371	XP_013449583.1_uncharacterized protein LOC11416135 isoform X1 [Medicago truncatula] KEH23611.1 hypothetical protein MTR_7g090930 [Medicago truncatula]	AT5G04000.1_hypothetical protein	.	1.14	1.09667	0.74	0.676667	1.08	0.57	1.77	0.86	1.8	0.63	0.42	0.85	0.95	1.09	0.57	0.37
Am_Tr_000932	1153	XP_003625101.1_uncharacterized protein LOC11416135 isoform X2 [Medicago truncatula] AES81319.1 hypothetical protein MTR_7g090930 [Medicago truncatula] AFK46067.1 unknown [Medicago truncatula] RHN47813.1 hypothetical protein MtrunA17_Chr7g0257071 [Medicago truncatula]	AT5G04000.1_hypothetical protein	.	49.2067	39.2767	34.48	37.33	85.19	29.33	33.1	38.82	39.52	39.49	34.86	37.63	30.95	36.84	42.68	32.47
Am_Tr_000933	216	.	.	.	0	2.5	5.19667	0	0	0	0	0	0	7.5	7.21	4.21	4.17	0	0	0
Am_Tr_000934	335	.	.	.	1.79333	3.81333	3.43	2.62333	1.63	1.65	2.1	1.65	6.37	3.42	3.93	0.75	5.61	3.11	3.99	0.77
Am_Tr_000935	2285	KAE9601573.1_hypothetical protein Lalb_Chr13g0299281 [Lupinus albus]	AT2G34357.1_ARM repeat superfamily protein	.	4.06333	3.73667	1.44	3.11	2.57	5.2	4.42	4.45	3.51	3.25	1.01	1.54	1.77	4.26	3.1	1.97
Am_Tr_000936	2168	.	.	.	0.186667	1.84333	1.20667	1.9	0.1	0.36	0.1	1.5	2.45	1.58	0.98	1.1	1.54	2.26	1.58	1.86
Am_Tr_000937	2751	XP_024632402.1_uncharacterized zinc finger CCHC domain-containing protein At4g19190 isoform X1 [Medicago truncatula] XP_039686424.1 uncharacterized zinc finger CCHC domain-containing protein At4g19190 isoform X1 [Medicago truncatula] RHN73574.1 putative transcription factor interactor and regulator CCHC(Zn) family [Medicago truncatula]	AT4G19190.1_zinc knuckle (CCHC-type) family protein	IPR019339_CBF1-interacting co-repressor CIR, N-terminal domain	1.77667	4.64	3.68	3.53667	0.88	0.05	4.4	1.13	3.18	9.61	0.58	2.57	7.89	0.87	1.74	8
Am_Tr_000938	2570	XP_027360644.1_uncharacterized zinc finger CCHC domain-containing protein At4g19190 isoform X2 [Abrus precatorius]	AT4G19190.1_zinc knuckle (CCHC-type) family protein	.	0.59	0.883333	1.89333	0.876667	0	1.77	0	2.01	0	0.64	3.9	0.97	0.81	1.41	0.4	0.82
Am_Tr_000939	2828	XP_027360643.1_uncharacterized zinc finger CCHC domain-containing protein At4g19190 isoform X1 [Abrus precatorius]	AT4G19190.1_zinc knuckle (CCHC-type) family protein	IPR019339_CBF1-interacting co-repressor CIR, N-terminal domain	0.78	2.17	1.57667	1.55333	1.68	0.66	0	2.89	3.62	0	1.91	2.75	0.07	1.8	2.86	0
Am_Tr_000940	2713	XP_024632402.1_uncharacterized zinc finger CCHC domain-containing protein At4g19190 isoform X1 [Medicago truncatula] XP_039686424.1 uncharacterized zinc finger CCHC domain-containing protein At4g19190 isoform X1 [Medicago truncatula] RHN73574.1 putative transcription factor interactor and regulator CCHC(Zn) family [Medicago truncatula]	AT4G19190.1_zinc knuckle (CCHC-type) family protein	IPR019339_CBF1-interacting co-repressor CIR, N-terminal domain	0.593333	1.55333	1.24	1.70667	1	0.46	0.32	1.71	1.92	1.03	0.61	2.01	1.1	1.96	1.86	1.3
Am_Tr_000941	2790	XP_027360643.1_uncharacterized zinc finger CCHC domain-containing protein At4g19190 isoform X1 [Abrus precatorius]	AT4G19190.1_zinc knuckle (CCHC-type) family protein	IPR019339_CBF1-interacting co-repressor CIR, N-terminal domain	1.76333	2.05	1.81333	2.34	2.73	2.56	0	3.36	2.79	0	2.83	2.6	0.01	2.95	4.07	0
Am_Tr_000942	524	.	.	.	0	0	0	0	0	0	0	0	0	0	0	0	0	0	0	0
Am_Tr_000943	2873	.	.	.	0.05	0.1	0.153333	0.00666667	0	0	0.15	0.3	0	0	0.35	0	0.11	0.01	0.01	0
Am_Tr_000944	1947	.	.	.	0.0866667	0.453333	0.46	0.736667	0.22	0	0.04	0.26	0.33	0.77	0.53	0.19	0.66	0.85	0.67	0.69
Am_Tr_000945	709	.	.	.	0.713333	3.1	1.59	1.11	1.15	0.99	0	1.83	3.74	3.73	0.57	1.07	3.13	0.42	1.69	1.22
Am_Tr_000946	572	AES99968.1_Myb/SANT-like DNA-binding domain protein [Medicago truncatula]	.	.	0.0966667	0.413333	0	0.05	0	0	0.29	0.16	0.44	0.64	0	0	0	0.15	0	0
Am_Tr_000947	556	.	.	.	24.5133	12.7033	23.1867	23.5233	33.18	22.54	17.82	15.89	11.21	11.01	32.66	16.73	20.17	27.36	16.87	26.34
Am_Tr_000948	549	.	.	.	11.9833	5.26333	4.83667	7.12667	23.42	6.9	5.63	4.08	4.6	7.11	3.12	5.14	6.25	4.54	11.24	5.6
Am_Tr_000949	618	.	.	.	8.47333	11.5067	6.36	12.4767	6.68	14.72	4.02	12.28	14.54	7.7	5.17	8.78	5.13	13.78	14	9.65
Am_Tr_000950	1652	.	.	.	0	0.23	0.14	0.566667	0	0	0	0	0.69	0	0	0.42	0	0.16	0.84	0.7
Am_Tr_000951	1250	.	.	.	7.58333	6.47667	6.50667	8.6	9.1	6.94	6.71	5.18	7.04	7.21	7.78	7.28	4.46	8.35	9	8.45
Am_Tr_000952	544	AES99968.1_Myb/SANT-like DNA-binding domain protein [Medicago truncatula]	.	.	6.31	13.2733	14.01	12.3233	0.3	11.05	7.58	0.57	13.43	25.82	0.75	11.16	30.12	0.31	9.52	27.14
Am_Tr_000953	599	AES99968.1_Myb/SANT-like DNA-binding domain protein [Medicago truncatula]	.	.	30.4233	13.5667	18.5333	15.8433	41	22.33	27.94	17.6	9.31	13.79	24.37	13.88	17.35	18.66	14.1	14.77
Am_Tr_000954	744	.	.	.	0.583333	3.46333	1.45	3.09667	0.33	0.68	0.74	3	5.32	2.07	0.7	0.88	2.77	1.87	4.53	2.89
Am_Tr_000955	2578	.	.	.	0	0.156667	0	0.223333	0	0	0	0.18	0.29	0	0	0	0	0.35	0.23	0.09
Am_Tr_000956	514	.	.	.	11.6267	2.35	4.12	4.48333	22.07	9.14	3.67	1.79	3.12	2.14	3.99	6.1	2.27	2.44	6.11	4.9
Am_Tr_000957	2042	.	.	.	0.02	0.276667	0.286667	0.793333	0	0.06	0	0.31	0.24	0.28	0.27	0.27	0.32	0.8	0.97	0.61
Am_Tr_000958	956	MCH82643.1_translocase of chloroplast 132 chloroplastic-like [Trifolium medium]	AT2G16640.2_multimeric translocon complex in the outer envelope membrane 132, GeneName=TOC132	IPR024283_Translocase of chloroplast 159/132, membrane anchor domain	0	0.943333	2.20667	1.75333	0	0	0	0	0	2.83	1.48	4.58	0.56	1.49	3.77	0
Am_Tr_000959	1014	MCH82643.1_translocase of chloroplast 132 chloroplastic-like [Trifolium medium]	AT2G16640.2_multimeric translocon complex in the outer envelope membrane 132, GeneName=TOC132	IPR024283_Translocase of chloroplast 159/132, membrane anchor domain	1.09333	5.95667	8.48333	6.18	0	3.28	0	4.74	5.05	8.08	8.74	8.21	8.5	7.4	4.37	6.77
Am_Tr_000960	925	.	.	.	0.22	0.69	0.656667	0.396667	0.55	0	0.11	0.76	0.5	0.81	0.34	1	0.63	0.45	0.33	0.41
Am_Tr_000961	837	MCH82643.1_translocase of chloroplast 132 chloroplastic-like [Trifolium medium]	AT2G16640.2_multimeric translocon complex in the outer envelope membrane 132, GeneName=TOC132	IPR024283_Translocase of chloroplast 159/132, membrane anchor domain	1.02	3.77	3.44333	7.93667	1.09	0.46	1.51	3.05	8.26	0	0	4.54	5.79	6.74	6.43	10.64
Am_Tr_000962	991	.	.	.	0.19	1.03	0.423333	0.666667	0	0.37	0.2	0.86	1.02	1.21	0	0.7	0.57	0.54	0.59	0.87
Am_Tr_000963	839	.	.	.	0	0.126667	0.106667	0.116667	0	0	0	0	0.38	0	0	0.17	0.15	0.35	0	0
Am_Tr_000964	253	.	.	.	1.36	2.02667	5.37667	1.29667	0	2.15	1.93	1.97	2.4	1.71	4.92	5.7	5.51	0	1.99	1.9
Am_Tr_000965	245	.	.	.	0	1.51	0	0	0	0	0	4.53	0	0	0	0	0	0	0	0
Am_Tr_000966	2330	XP_019449930.1_PREDICTED: serine/threonine receptor-like kinase NFP [Lupinus angustifolius] OIW07712.1 hypothetical protein TanjilG_19655 [Lupinus angustifolius]	AT2G23770.1_protein kinase family protein / peptidoglycan-binding LysM domain-containing protein, GeneName=LYK4	IPR000719_Protein kinase domain; IPR011009_Protein kinase-like domain superfamily; IPR018392_LysM domain	35.55	58.3467	25.3033	56.2167	6.78	69.24	30.63	31.37	78.07	65.6	12.38	25.21	38.32	71.16	51.41	46.08
Am_Tr_000967	3965	XP_019449930.1_PREDICTED: serine/threonine receptor-like kinase NFP [Lupinus angustifolius] OIW07712.1 hypothetical protein TanjilG_19655 [Lupinus angustifolius]	AT2G33580.1_Protein kinase superfamily protein, GeneName=LYK5	IPR018392_LysM domain	2.28333	4.73667	2.07	5.02	0.59	4.22	2.04	2.4	6.79	5.02	0.42	1.68	4.11	8.7	3.24	3.12
Am_Tr_000968	2802	XP_027352617.1_receptor protein kinase-like protein ZAR1 [Abrus precatorius]	AT1G67510.1_Leucine-rich repeat protein kinase family protein	IPR011009_Protein kinase-like domain superfamily; IPR000719_Protein kinase domain; IPR013210_Leucine-rich repeat-containing N-terminal, plant-type	0.34	4.58333	9.50667	2.76333	0.64	0.11	0.27	3.63	5.68	4.44	6.79	12.24	9.49	2.8	2.58	2.91
Am_Tr_000969	1309	KYP63622.1_Receptor protein kinase CLAVATA1 [Cajanus cajan]	AT1G67510.1_Leucine-rich repeat protein kinase family protein	IPR001245_Serine-threonine/tyrosine-protein kinase, catalytic domain; IPR011009_Protein kinase-like domain superfamily	0	0.113333	3.71667	0.22	0	0	0	0	0.34	0	11.15	0	0	0.66	0	0
Am_Tr_000970	666	.	.	.	0.0733333	0.0633333	0	0.213333	0	0.22	0	0	0	0.19	0	0	0	0	0	0.64
Am_Tr_000971	482	.	.	.	0	0.133333	0.216667	0.243333	0	0	0	0	0.4	0	0	0.34	0.31	0.36	0.37	0
Am_Tr_000972	411	.	.	.	0	0	0	0.163333	0	0	0	0	0	0	0	0	0	0.49	0	0
Am_Tr_000973	1362	TKY60301.1_regulation of transcription [Spatholobus suberectus]	AT4G39780.1_Integrase-type DNA-binding superfamily protein	IPR016177_DNA-binding domain superfamily; IPR001471_AP2/ERF domain	8.02333	0.05	0.2	0.416667	5.49	7.23	11.35	0	0	0.15	0	0.43	0.17	0.62	0.63	0
Am_Tr_000974	1532	GAU17146.1_hypothetical protein TSUD_177760 [Trifolium subterraneum]	AT1G67510.1_Leucine-rich repeat protein kinase family protein	IPR013210_Leucine-rich repeat-containing N-terminal, plant-type; IPR001611_Leucine-rich repeat	0	0	0	0	0	0	0	0	0	0	0	0	0	0	0	0
Am_Tr_000975	1498	.	.	.	0.04	0.106667	0.0733333	0.13	0	0	0.12	0.17	0	0.15	0	0.07	0.15	0.08	0	0.31
Am_Tr_000976	2184	XP_003519618.1_probable WRKY transcription factor 20 isoform X1 [Glycine max] XP_028221428.1 probable WRKY transcription factor 20 isoform X1 [Glycine soja] KAG5064762.1 hypothetical protein JHK85_005945 [Glycine max] KRH73864.1 hypothetical protein GLYMA_02G297400v4 [Glycine max] RZC27387.1 putative WRKY transcription factor 20 isoform A [Glycine soja]	AT4G26640.2_WRKY family transcription factor family protein, GeneName=WRKY20	IPR003657_WRKY domain; IPR036576_WRKY domain superfamily	8.9	8.97	9.73333	15.0367	10.9	9.8	6	8.95	9.62	8.34	8.67	9.26	11.27	10.11	16.84	18.16
Am_Tr_000977	2637	KHN43870.1_Putative WRKY transcription factor 20 [Glycine soja]	AT4G26640.4_WRKY family transcription factor family protein, GeneName=WRKY20	IPR036576_WRKY domain superfamily; IPR003657_WRKY domain	0.143333	0.0133333	0.16	0	0	0.43	0	0	0	0.04	0.14	0.14	0.2	0	0	0
Am_Tr_000978	2532	KHN43870.1_Putative WRKY transcription factor 20 [Glycine soja]	AT4G26640.4_WRKY family transcription factor family protein, GeneName=WRKY20	IPR036576_WRKY domain superfamily; IPR003657_WRKY domain	0	0.296667	0.103333	0.0566667	0	0	0	0.44	0	0.45	0.31	0	0	0	0	0.17
Am_Tr_000979	2538	KHN43870.1_Putative WRKY transcription factor 20 [Glycine soja]	AT4G26640.4_WRKY family transcription factor family protein, GeneName=WRKY20	IPR003657_WRKY domain; IPR036576_WRKY domain superfamily	0.146667	0.22	0.01	0.673333	0.29	0	0.15	0	0.65	0.01	0	0.03	0	0.79	0.84	0.39
Am_Tr_000980	2283	XP_027343728.1_probable WRKY transcription factor 20 isoform X1 [Abrus precatorius]	AT4G26640.2_WRKY family transcription factor family protein, GeneName=WRKY20	IPR036576_WRKY domain superfamily; IPR003657_WRKY domain	0	0	0.163333	0	0	0	0	0	0	0	0	0.49	0	0	0	0
Am_Tr_000981	2254	KHN43870.1_Putative WRKY transcription factor 20 [Glycine soja]	AT4G26640.4_WRKY family transcription factor family protein, GeneName=WRKY20	IPR036576_WRKY domain superfamily; IPR003657_WRKY domain	0.13	0.1	0.16	0.266667	0	0	0.39	0	0	0.3	0.1	0.38	0	0	0.8	0
Am_Tr_000982	2816	KHN43870.1_Putative WRKY transcription factor 20 [Glycine soja]	AT4G26640.4_WRKY family transcription factor family protein, GeneName=WRKY20	IPR003657_WRKY domain; IPR036576_WRKY domain superfamily	0.103333	0.433333	0.126667	0.44	0	0.31	0	0.51	0	0.79	0	0	0.38	0	0	1.32
Am_Tr_000983	2501	TKY46989.1_WRKY transcription factor 20 [Spatholobus suberectus]	AT4G26640.2_WRKY family transcription factor family protein, GeneName=WRKY20	IPR036576_WRKY domain superfamily; IPR003657_WRKY domain	25.4533	28.3733	24.9467	29.9733	41.32	19.99	15.05	32.32	25.4	27.4	18.84	27.45	28.55	25.86	23.69	40.37
Am_Tr_000984	3141	TKY46989.1_WRKY transcription factor 20 [Spatholobus suberectus]	AT4G26640.1_WRKY family transcription factor family protein, GeneName=WRKY20	IPR036576_WRKY domain superfamily; IPR003657_WRKY domain	0.78	2.75667	2.00333	1.24667	1.53	0.81	0	3.95	1.94	2.38	1.16	2.72	2.13	1.26	0.86	1.62
Am_Tr_000985	2706	QFI57409.1_WRKY14 [Glycyrrhiza glabra]	AT4G26640.2_WRKY family transcription factor family protein, GeneName=WRKY20	IPR003657_WRKY domain; IPR036576_WRKY domain superfamily	0.173333	0.826667	0.72	0.296667	0.28	0	0.24	0.66	0.43	1.39	0.58	1.03	0.55	0.62	0.13	0.14
Am_Tr_000986	2353	KHN43870.1_Putative WRKY transcription factor 20 [Glycine soja]	AT4G26640.4_WRKY family transcription factor family protein, GeneName=WRKY20	IPR036576_WRKY domain superfamily; IPR003657_WRKY domain	0	0.0766667	0.24	0	0	0	0	0	0	0.23	0.5	0.2	0.02	0	0	0
Am_Tr_000987	2933	XP_029130150.1_probable WRKY transcription factor 20 isoform X2 [Cajanus cajan]	AT4G26640.1_WRKY family transcription factor family protein, GeneName=WRKY20	IPR036576_WRKY domain superfamily; IPR003657_WRKY domain	0.216667	0.33	0.326667	0.136667	0.26	0.39	0	0.16	0.08	0.75	0	0.28	0.7	0.41	0	0
Am_Tr_000988	2462	XP_003519618.1_probable WRKY transcription factor 20 isoform X1 [Glycine max] XP_028221428.1 probable WRKY transcription factor 20 isoform X1 [Glycine soja] KAG5064762.1 hypothetical protein JHK85_005945 [Glycine max] KRH73864.1 hypothetical protein GLYMA_02G297400v4 [Glycine max] RZC27387.1 putative WRKY transcription factor 20 isoform A [Glycine soja]	AT4G26640.7_WRKY family transcription factor family protein, GeneName=WRKY20	IPR036576_WRKY domain superfamily; IPR003657_WRKY domain	1.33667	0.896667	1.48333	2.59667	0	3.4	0.61	1.58	1.11	0	1.72	1.69	1.04	1.75	2.67	3.37
Am_Tr_000989	2188	PNY15110.1_cysteine desulfurase mitochondrial-like [Trifolium pratense]	.	IPR025558_Domain of unknown function DUF4283	0.833333	0.156667	0.08	0.176667	2.5	0	0	0.47	0	0	0.24	0	0	0.53	0	0
Am_Tr_000990	573	QFI57454.1_WRKY59 [Glycyrrhiza glabra]	.	.	0.186667	0.96	0.31	0.09	0.28	0.28	0	1.07	0.6	1.21	0.22	0.25	0.46	0.27	0	0
Am_Tr_000991	417	.	.	.	0.136667	0.136667	0.7	0.16	0	0	0.41	0	0	0.41	0.4	0.45	1.25	0	0.48	0
Am_Tr_000992	811	RDX61654.1_Acyl-CoA-binding protein [Mucuna pruriens]	.	.	0.103333	0.23	0.61	0.113333	0	0.17	0.14	0.32	0.37	0	1.18	0.37	0.28	0.34	0	0
Am_Tr_000993	917	XP_016201243.1_acyl-CoA-binding protein [Arachis ipaensis]	AT1G31812.1_acyl-CoA-binding protein 6, GeneName=ACBP6	.	0.203333	0.393333	1.12667	0.0866667	0	0.23	0.38	0.23	0	0.95	1.69	0.72	0.97	0	0	0.26
Am_Tr_000994	704	KAF5176679.1_Acyl-coa-binding protein [Thalictrum thalictroides]	AT1G31812.1_acyl-CoA-binding protein 6, GeneName=ACBP6	.	0.0633333	0.153333	0.956667	0.236667	0	0	0.19	0.46	0	0	1.67	0.8	0.4	0.24	0	0.47
Am_Tr_000995	799	XP_016201243.1_acyl-CoA-binding protein [Arachis ipaensis]	AT1G31812.1_acyl-CoA-binding protein 6, GeneName=ACBP6	.	88.8867	195.32	323.227	227.487	72.96	104.42	89.28	182.98	203.35	199.63	420.05	265.07	284.56	229.08	198.66	254.72
Am_Tr_000996	262	.	.	.	0	0	3.09333	0	0	0	0	0	0	0	4.34	4.94	0	0	0	0
Am_Tr_000997	224	.	.	.	0	0	0	0	0	0	0	0	0	0	0	0	0	0	0	0
Am_Tr_000998	1013	.	.	.	0.38	0.85	0.713333	0.566667	0.36	0.49	0.29	0.58	0.92	1.05	0.2	0.91	1.03	0.24	0.86	0.6
Am_Tr_000999	220	.	.	.	0	0	0	0	0	0	0	0	0	0	0	0	0	0	0	0
Am_Tr_001000	763	.	AT5G13490.1_ADP/ATP carrier 2, GeneName=AAC2	.	1.54333	1.52	0.933333	2.34667	2.84	1.07	0.72	1.02	1.55	1.99	0.29	1.16	1.35	3.5	1.79	1.75
Am_Tr_001001	316	.	.	.	0	0.91	0	0	0	0	0	2.73	0	0	0	0	0	0	0	0
Am_Tr_001002	6414	XP_012568016.1_UDP-glucose:glycoprotein glucosyltransferase [Cicer arietinum]	AT1G71220.3_EMS-MUTAGENIZED BRI1 SUPPRESSOR 1, GeneName=EBS1	IPR040693_UGGT, thioredoxin-like domain 1; IPR040525_UDP-glucose:glycoprotein glucosyltransferase, thioredoxin-like domain 4; IPR040694_UGGT, thioredoxin-like domain 2; IPR040692_UGGT, thioredoxin-like domain 3	0.16	0.436667	0.78	0.00333333	0	0.31	0.17	0	1.31	0	0	2.32	0.02	0	0	0.01
Am_Tr_001003	4600	XP_012568016.1_UDP-glucose:glycoprotein glucosyltransferase [Cicer arietinum]	AT1G71220.2_EMS-MUTAGENIZED BRI1 SUPPRESSOR 1, GeneName=EBS1	IPR029044_Nucleotide-diphospho-sugar transferases; IPR040497_Glucosyltransferase 24, catalytic domain; IPR009448_UDP-glucose:Glycoprotein Glucosyltransferase	0.0333333	0	0	0	0.1	0	0	0	0	0	0	0	0	0	0	0
Am_Tr_001004	2646	MCH81595.1_RNA polymerase-associated protein CTR9 [Trifolium medium]	AT2G06210.1_binding protein, GeneName=ELF8	.	0.83	2.14667	2.37333	1.66667	0.65	0.26	1.58	3.09	2.44	0.91	0.55	3.3	3.27	1.09	1.31	2.6
Am_Tr_001005	6301	XP_012568016.1_UDP-glucose:glycoprotein glucosyltransferase [Cicer arietinum]	AT1G71220.2_EMS-MUTAGENIZED BRI1 SUPPRESSOR 1, GeneName=EBS1	IPR040693_UGGT, thioredoxin-like domain 1; IPR040525_UDP-glucose:glycoprotein glucosyltransferase, thioredoxin-like domain 4; IPR040694_UGGT, thioredoxin-like domain 2; IPR040692_UGGT, thioredoxin-like domain 3	1.78333	1.74333	2.74333	1.33	0	4.77	0.58	0	4.22	1.01	0	3.07	5.16	0	0.92	3.07
Am_Tr_001006	6435	XP_012568016.1_UDP-glucose:glycoprotein glucosyltransferase [Cicer arietinum]	AT1G71220.2_EMS-MUTAGENIZED BRI1 SUPPRESSOR 1, GeneName=EBS1	IPR029044_Nucleotide-diphospho-sugar transferases; IPR040497_Glucosyltransferase 24, catalytic domain	0.17	0.99	1.53333	1.45	0.21	0.07	0.23	2.25	0.72	0	0.7	3.26	0.64	4.35	0	0
Am_Tr_001007	4811	XP_012568016.1_UDP-glucose:glycoprotein glucosyltransferase [Cicer arietinum]	AT1G71220.2_EMS-MUTAGENIZED BRI1 SUPPRESSOR 1, GeneName=EBS1	IPR029044_Nucleotide-diphospho-sugar transferases; IPR040497_Glucosyltransferase 24, catalytic domain; IPR009448_UDP-glucose:Glycoprotein Glucosyltransferase	2.48333	4.63	4.23667	4.04667	2.23	2.92	2.3	4.93	4.14	4.82	5.07	3.63	4.01	4.56	4.61	2.97
Am_Tr_001008	4559	XP_012568016.1_UDP-glucose:glycoprotein glucosyltransferase [Cicer arietinum]	AT1G71220.2_EMS-MUTAGENIZED BRI1 SUPPRESSOR 1, GeneName=EBS1	IPR029044_Nucleotide-diphospho-sugar transferases; IPR040497_Glucosyltransferase 24, catalytic domain; IPR009448_UDP-glucose:Glycoprotein Glucosyltransferase	2.06667	2.02	0.42	1.84	3.37	2.32	0.51	0.95	3.42	1.69	0	0.74	0.52	1.48	2.25	1.79
Am_Tr_001009	2347	GAU41349.1_hypothetical protein TSUD_390350, partial [Trifolium subterraneum]	AT1G71220.2_EMS-MUTAGENIZED BRI1 SUPPRESSOR 1, GeneName=EBS1	IPR029044_Nucleotide-diphospho-sugar transferases; IPR040497_Glucosyltransferase 24, catalytic domain; IPR009448_UDP-glucose:Glycoprotein Glucosyltransferase	9.86333	19.47	29.3333	22.98	8.62	10.46	10.51	18.91	20.89	18.61	35.81	27.68	24.51	27.12	20.17	21.65
Am_Tr_001010	2458	.	.	.	0	1.50667	0.0166667	0.0566667	0	0	0	2.13	1.07	1.32	0	0.05	0	0	0.12	0.05
Am_Tr_001011	6527	XP_012568016.1_UDP-glucose:glycoprotein glucosyltransferase [Cicer arietinum]	AT1G71220.2_EMS-MUTAGENIZED BRI1 SUPPRESSOR 1, GeneName=EBS1	IPR029044_Nucleotide-diphospho-sugar transferases; IPR040497_Glucosyltransferase 24, catalytic domain; IPR009448_UDP-glucose:Glycoprotein Glucosyltransferase	0.0266667	0.08	0.07	0.09	0	0.04	0.04	0	0.24	0	0	0	0.21	0	0	0.27
Am_Tr_001012	6209	XP_012568016.1_UDP-glucose:glycoprotein glucosyltransferase [Cicer arietinum]	AT1G71220.3_EMS-MUTAGENIZED BRI1 SUPPRESSOR 1, GeneName=EBS1	IPR040693_UGGT, thioredoxin-like domain 1; IPR040525_UDP-glucose:glycoprotein glucosyltransferase, thioredoxin-like domain 4; IPR040694_UGGT, thioredoxin-like domain 2; IPR040692_UGGT, thioredoxin-like domain 3	5.14667	14.8167	13.3867	14.5733	5.41	6.11	3.92	14.39	14.85	15.21	6.23	17.53	16.4	11.06	15.23	17.43
Am_Tr_001013	6506	XP_012568016.1_UDP-glucose:glycoprotein glucosyltransferase [Cicer arietinum]	AT1G71220.3_EMS-MUTAGENIZED BRI1 SUPPRESSOR 1, GeneName=EBS1	IPR040693_UGGT, thioredoxin-like domain 1; IPR040525_UDP-glucose:glycoprotein glucosyltransferase, thioredoxin-like domain 4; IPR040694_UGGT, thioredoxin-like domain 2; IPR040692_UGGT, thioredoxin-like domain 3	0.0966667	0.133333	0.00333333	0.226667	0	0.26	0.03	0	0.4	0	0	0	0.01	0	0	0.68
Am_Tr_001014	4672	XP_012568016.1_UDP-glucose:glycoprotein glucosyltransferase [Cicer arietinum]	AT1G71220.2_EMS-MUTAGENIZED BRI1 SUPPRESSOR 1, GeneName=EBS1	IPR029044_Nucleotide-diphospho-sugar transferases; IPR040497_Glucosyltransferase 24, catalytic domain	0.566667	0.606667	0.583333	0.54	1.6	0.05	0.05	1.15	0.67	0	1.2	0.55	0	1.62	0	0
Am_Tr_001015	6322	GAU41349.1_hypothetical protein TSUD_390350, partial [Trifolium subterraneum]	AT1G71220.2_EMS-MUTAGENIZED BRI1 SUPPRESSOR 1, GeneName=EBS1	IPR029044_Nucleotide-diphospho-sugar transferases; IPR040497_Glucosyltransferase 24, catalytic domain; IPR009448_UDP-glucose:Glycoprotein Glucosyltransferase	0.866667	2.18333	0.44	1.33	0.28	1.57	0.75	1.88	2.13	2.54	0	0.09	1.23	0	2.57	1.42
Am_Tr_001016	1815	XP_004500164.1_DNA damage-inducible protein 1 [Cicer arietinum]	AT3G13235.3_ubiquitin family protein, GeneName=DDI1	.	0.02	1.33667	3.23667	1.11	0	0	0.06	0.77	2.01	1.23	3.08	5.42	1.21	0.49	1.31	1.53
Am_Tr_001017	3679	RHN72433.1_putative F-box domain-containing protein [Medicago truncatula]	.	IPR036047_F-box-like domain superfamily; IPR017451_F-box associated interaction domain	6.81333	0.63	2.12333	1.74333	5.34	5.76	9.34	0.2	0.5	1.19	1.53	1.1	3.74	1.36	2	1.87
Am_Tr_001018	4922	RHN72433.1_putative F-box domain-containing protein [Medicago truncatula]	AT3G13235.3_ubiquitin family protein, GeneName=DDI1	IPR036047_F-box-like domain superfamily; IPR017451_F-box associated interaction domain	0.923333	0.613333	1.49333	1.49	1.24	1.39	0.14	1.15	0.69	0	1.21	2.46	0.81	1.8	1.95	0.72
Am_Tr_001019	4676	RHN72433.1_putative F-box domain-containing protein [Medicago truncatula]	AT3G13235.3_ubiquitin family protein, GeneName=DDI1	IPR036047_F-box-like domain superfamily; IPR017451_F-box associated interaction domain	3.28	1.14	2.35	1.8	5.08	0.56	4.2	1.51	0.56	1.35	0.73	2.12	4.2	0.3	2.16	2.94
Am_Tr_001020	4797	RHN72433.1_putative F-box domain-containing protein [Medicago truncatula]	AT3G13235.3_ubiquitin family protein, GeneName=DDI1	IPR036047_F-box-like domain superfamily; IPR017451_F-box associated interaction domain	1.18667	2.2	1.36333	0.896667	0.59	2.13	0.84	1.59	2.13	2.88	1.31	2.62	0.16	0.33	1.43	0.93
Am_Tr_001021	5043	RHN72433.1_putative F-box domain-containing protein [Medicago truncatula]	AT3G13235.3_ubiquitin family protein, GeneName=DDI1	IPR036047_F-box-like domain superfamily; IPR017451_F-box associated interaction domain	1.57333	0.983333	1.23333	1.44667	0.1	4.6	0.02	0.95	2	0	1.24	2.41	0.05	2.77	1.28	0.29
Am_Tr_001022	812	NP_001238059.1_phosphoribosylglycinamide formyltransferase, chloroplastic [Glycine max] AAP86248.2 glycinamide ribonucleotide transformylase [Glycine max] KAG4912746.1 hypothetical protein JHK86_053179 [Glycine max] KAG4927573.1 hypothetical protein JHK85_054059 [Glycine max] KAG5083168.1 hypothetical protein JHK84_053206 [Glycine max] KAG5085940.1 hypothetical protein JHK82_053337 [Glycine max]	.	.	3.47667	13.5733	8.75	8.64	3.58	5.53	1.32	12.95	14	13.77	4.56	12.75	8.94	6.58	9.03	10.31
Am_Tr_001023	6312	TKY62423.1_NETWORKED 1D [Spatholobus suberectus]	AT1G03080.2_kinase interacting (KIP1-like) family protein, GeneName=NET1D	IPR011684_Protein Networked (NET), actin-binding (NAB) domain	10.2667	1.93667	5.94333	7.48667	8.2	7.47	15.13	1.31	3.14	1.36	5.5	6.62	5.71	5.59	8.12	8.75
Am_Tr_001024	6405	XP_004495177.1_protein NETWORKED 1D [Cicer arietinum]	AT1G03080.2_kinase interacting (KIP1-like) family protein, GeneName=NET1D	IPR011684_Protein Networked (NET), actin-binding (NAB) domain	29.6567	23.67	30.6867	41.6567	25.34	29.77	33.86	22.08	27.48	21.45	20.14	38.84	33.08	33.66	54.86	36.45
Am_Tr_001025	473	XP_004516823.1_vesicle-associated protein 1-2-like [Cicer arietinum]	AT2G45140.2_plant VAP homolog 12, GeneName=PVA12	IPR016763_Vesicle-associated membrane-protein-associated protein; IPR008962_PapD-like superfamily; IPR000535_Major sperm protein (MSP) domain	37.5	45.9267	52.5033	48.6133	23.55	55.36	33.59	47.47	52.1	38.21	32.88	65.76	58.87	51.96	48.03	45.85
Am_Tr_001026	467	GAU24490.1_hypothetical protein TSUD_156020 [Trifolium subterraneum]	AT3G60600.2_vesicle associated protein, GeneName=VAP27-1	.	0.69	2.03333	0	1.38667	0	2.07	0	0	2.68	3.42	0	0	0	0	1.12	3.04
Am_Tr_001027	488	KAE9607449.1_putative major sperm protein (MSP) [Lupinus albus] KAF1862440.1 hypothetical protein Lal_00026974 [Lupinus albus]	AT2G45140.2_plant VAP homolog 12, GeneName=PVA12	.	0.34	0.27	1.27	1.56	0.38	0	0.64	0.39	0.42	0	0	1.08	2.73	1.98	1.59	1.11
Am_Tr_001028	2749	XP_004513433.1_IQ domain-containing protein IQM1-like [Cicer arietinum]	AT5G57010.1_calmodulin-binding family protein	.	1.92333	0.976667	1.79	0.71	2.21	0.9	2.66	1.03	0.83	1.07	0.89	1.55	2.93	1.28	0.13	0.72
Am_Tr_001029	2788	RDX77499.1_IQ domain-containing protein IQM1, partial [Mucuna pruriens]	AT2G26190.2_calmodulin-binding family protein	.	2.78	5.62	2.86667	2.44333	2.38	1.25	4.71	7.51	5.72	3.63	2.52	3.24	2.84	3.84	3.23	0.26
Am_Tr_001030	2846	XP_004513433.1_IQ domain-containing protein IQM1-like [Cicer arietinum]	AT2G26190.1_calmodulin-binding family protein	.	1.12667	0.713333	0.593333	0.283333	0.72	0	2.66	0	1.2	0.94	0.64	0.7	0.44	0.85	0	0
Am_Tr_001031	2558	XP_004513433.1_IQ domain-containing protein IQM1-like [Cicer arietinum]	AT2G26190.1_calmodulin-binding family protein	.	57.75	78.5567	25.7633	50.27	19.66	46.65	106.94	96.99	54.46	84.22	12.62	27.62	37.05	106.29	18.34	26.18
Am_Tr_001032	3076	RDX77499.1_IQ domain-containing protein IQM1, partial [Mucuna pruriens]	AT2G26190.2_calmodulin-binding family protein	.	3.02667	5.44667	1.05333	3.39	5.1	2.23	1.75	6.61	5.14	4.59	0	0.91	2.25	7.43	0.63	2.11
Am_Tr_001033	2307	XP_045811906.1_IQ domain-containing protein IQM1-like [Trifolium pratense]	AT4G33050.3_calmodulin-binding family protein, GeneName=EDA39	.	117.913	15.37	3.63333	22.3567	25.82	96.38	231.54	28.59	7.38	10.14	2.22	3.06	5.62	50.69	6.77	9.61
Am_Tr_001034	2461	KEH32503.1_calmodulin-binding family protein [Medicago truncatula]	AT2G26190.2_calmodulin-binding family protein	.	0.0766667	0.196667	0	0.443333	0.23	0	0	0	0	0.59	0	0	0	0	0.79	0.54
Am_Tr_001035	1702	KEH32503.1_calmodulin-binding family protein [Medicago truncatula]	AT4G33050.4_calmodulin-binding family protein, GeneName=EDA39	.	0.14	2.18333	0.236667	0.55	0.16	0	0.26	1.71	1.1	3.74	0.36	0.19	0.16	0.94	0	0.71
Am_Tr_001036	2410	PNX96296.1_calmodulin-binding protein [Trifolium pratense] PNY01364.1 calmodulin-binding protein [Trifolium pratense]	AT5G57010.1_calmodulin-binding family protein	.	0	0	0	0	0	0	0	0	0	0	0	0	0	0	0	0
Am_Tr_001037	2531	XP_020963019.1_IQ domain-containing protein IQM4 isoform X2 [Arachis ipaensis]	AT5G57010.1_calmodulin-binding family protein	.	17.6333	2.22667	1.13333	3.03	10.39	13.63	28.88	3.9	2.06	0.72	0.82	1.38	1.2	8.87	0	0.22
Am_Tr_001038	1301	XP_045811906.1_IQ domain-containing protein IQM1-like [Trifolium pratense]	AT4G33050.6_calmodulin-binding family protein, GeneName=EDA39	.	1.38	0.523333	0.223333	0.72	0.55	0.85	2.74	0.58	0.82	0.17	0.11	0.23	0.33	1.48	0.4	0.28
Am_Tr_001039	545	XP_027346968.1_apoptosis-inducing factor homolog B-like [Abrus precatorius]	AT3G44190.2_FAD/NAD(P)-binding oxidoreductase family protein	.	5.23	1.05667	1.01667	2.61	2.82	6.4	6.47	2.72	0.45	0	0.33	0	2.72	6.63	0	1.2
Am_Tr_001040	1754	XP_004506219.1_apoptosis-inducing factor homolog A-like [Cicer arietinum]	AT3G44190.1_FAD/NAD(P)-binding oxidoreductase family protein	IPR036188_FAD/NAD(P)-binding domain superfamily; IPR023753_FAD/NAD(P)-binding domain	9.58	2.01333	3.94333	3.65333	5.78	10.44	12.52	2.92	2.11	1.01	1.26	4.22	6.35	4.61	3.6	2.75
Am_Tr_001041	1530	XP_004506219.1_apoptosis-inducing factor homolog A-like [Cicer arietinum]	AT5G22140.1_FAD/NAD(P)-binding oxidoreductase family protein	IPR023753_FAD/NAD(P)-binding domain; IPR036188_FAD/NAD(P)-binding domain superfamily	288.207	24.7267	33.8767	94.8567	143.77	310.01	410.84	38.4	23.12	12.66	35.81	21.91	43.91	115.63	83.08	85.86
Am_Tr_001042	1471	XP_004490332.1_endo-1,4-beta-xylanase 5-like [Cicer arietinum]	AT4G33860.1_Glycosyl hydrolase family 10 protein	.	2.36667	10.4633	9.04667	5.60333	6.53	0.57	0	7.72	8.63	15.04	8.98	9.43	8.73	3.98	5.55	7.28
Am_Tr_001043	1874	XP_004490332.1_endo-1,4-beta-xylanase 5-like [Cicer arietinum]	AT4G35830.1_aconitase 1, GeneName=ACO1	.	1.83667	3.15	2.79667	1.75333	1.94	1.19	2.38	3.32	3.93	2.2	4.11	1.4	2.88	2.03	2.09	1.14
Am_Tr_001044	1061	KAF3597791.1_hypothetical protein DY000_02027842 [Brassica cretica]	AT4G33860.1_Glycosyl hydrolase family 10 protein	.	15.5667	9.30667	4.28667	7.85	33.77	6.94	5.99	10.56	9.07	8.29	4.54	5.78	2.54	7.77	10	5.78
Am_Tr_001045	494	.	.	.	14.0333	3.20667	2.58667	3.03667	42.1	0	0	9.62	0	0	7.76	0	0	9.11	0	0
Am_Tr_001046	1719	XP_004490332.1_endo-1,4-beta-xylanase 5-like [Cicer arietinum]	AT4G35830.1_aconitase 1, GeneName=ACO1	.	2.48333	0.39	1.13	0.35	7.03	0	0.42	0.53	0	0.64	0.62	2.77	0	0	0	1.05
Am_Tr_001047	1574	XP_004490332.1_endo-1,4-beta-xylanase 5-like [Cicer arietinum]	AT4G33860.1_Glycosyl hydrolase family 10 protein	.	4.84667	3.92667	1.27667	4.82333	5.74	2.2	6.6	3.36	4.43	3.99	0.67	0.62	2.54	3.81	6.6	4.06
Am_Tr_001048	1251	XP_004490332.1_endo-1,4-beta-xylanase 5-like [Cicer arietinum]	AT4G33860.1_Glycosyl hydrolase family 10 protein	.	0.08	0.0866667	0	0.0733333	0.24	0	0	0	0.26	0	0	0	0	0	0	0.22
Am_Tr_001049	1063	KAH0894132.1_hypothetical protein HID58_056561 [Brassica napus] KAH0894186.1 hypothetical protein HID58_056615 [Brassica napus]	AT4G35830.1_aconitase 1, GeneName=ACO1	.	31.2967	29.75	16.6833	20.9733	67.04	10.92	15.93	25.45	31	32.8	13.14	20.06	16.85	16.88	25.12	20.92
Am_Tr_001050	551	.	.	.	0	0.623333	0	0	0	0	0	0	1.87	0	0	0	0	0	0	0
Am_Tr_001051	811	.	.	.	0.43	0.236667	0.81	0.5	0	0.39	0.9	0	0.71	0	0.31	0.51	1.61	0	0	1.5
Am_Tr_001052	1034	.	.	.	0.783333	2.76667	0.54	3.00333	0.28	0.16	1.91	4.9	1.23	2.17	1.62	0	0	3.46	3.96	1.59
Am_Tr_001053	828	XP_004490332.1_endo-1,4-beta-xylanase 5-like [Cicer arietinum]	AT4G33860.1_Glycosyl hydrolase family 10 protein	.	0	0	0.0766667	0	0	0	0	0	0	0	0	0.23	0	0	0	0
Am_Tr_001054	1379	XP_004490332.1_endo-1,4-beta-xylanase 5-like [Cicer arietinum]	AT4G33860.1_Glycosyl hydrolase family 10 protein	.	0.00333333	7.45333	1.95333	1.36667	0	0.01	0	5.04	11.25	6.07	1.24	2.69	1.93	1.09	1.14	1.87
Am_Tr_001055	1218	KAH0894132.1_hypothetical protein HID58_056561 [Brassica napus] KAH0894186.1 hypothetical protein HID58_056615 [Brassica napus]	AT4G35830.1_aconitase 1, GeneName=ACO1	.	2.86667	8.43667	6.76333	6.00333	2.87	2.79	2.94	8.44	11.64	5.23	4.59	7.39	8.31	7.52	6.27	4.22
Am_Tr_001056	3141	PNX88298.1_hypothetical protein L195_g044401, partial [Trifolium pratense]	.	.	1.87667	5.30333	2.7	1.44	2.49	2.6	0.54	7.21	3.32	5.38	0	5.34	2.76	3.14	1.18	0
Am_Tr_001057	2873	KYP78290.1_hypothetical protein KK1_049940, partial [Cajanus cajan]	.	IPR004242_Transposon, En/Spm-like	0.356667	18.04	2.4	3.27	0.36	0.51	0.2	20.37	21.82	11.93	0.27	4.02	2.91	2.34	3.98	3.49
Am_Tr_001058	3246	PNX88298.1_hypothetical protein L195_g044401, partial [Trifolium pratense]	.	.	7.61667	24.9467	10.0033	15.0067	10.04	8.15	4.66	21.84	29.8	23.2	3.43	12.87	13.71	10.98	16.17	17.87
Am_Tr_001059	972	XP_020207259.1_uncharacterized protein LOC109792269 [Cajanus cajan] KYP72832.1 TVP38/TMEM64 family membrane protein slr0305 family [Cajanus cajan]	AT5G19070.1_SNARE associated Golgi protein family	IPR032816_SNARE associated Golgi protein	21.83	34.4933	54.4	31.93	17.19	21.77	26.53	33.21	34.7	35.57	52.45	58.29	52.46	33.8	31.72	30.27
Am_Tr_001060	1619	XP_004486984.1_uncharacterized protein LOC101501849 isoform X2 [Cicer arietinum]	AT5G59610.4_Chaperone DnaJ-domain superfamily protein	IPR001623_DnaJ domain; IPR036869_Chaperone J-domain superfamily	13.17	34.7567	25.6867	29.92	13.8	14.69	11.02	36.32	31.69	36.26	20.94	28.21	27.91	31.74	31.77	26.25
Am_Tr_001061	1652	XP_027188507.1_uncharacterized protein LOC101501849 isoform X1 [Cicer arietinum]	AT5G59610.3_Chaperone DnaJ-domain superfamily protein	IPR001623_DnaJ domain; IPR036869_Chaperone J-domain superfamily	0.493333	6.48667	3.69	3.55667	0	1.15	0.33	6.3	4.81	8.35	2.99	3.31	4.77	3.74	1.64	5.29
Am_Tr_001062	665	KYP78290.1_hypothetical protein KK1_049940, partial [Cajanus cajan]	.	.	0.0666667	0.923333	0.25	0.263333	0.2	0	0	1.07	1.33	0.37	0.21	0	0.54	0.32	0.47	0
Am_Tr_001063	523	.	.	.	0	1.12	0.736667	0.106667	0	0	0	1.54	1.04	0.78	0.52	0.88	0.81	0	0.32	0
Am_Tr_001064	374	.	.	.	10.02	0.426667	0	0.596667	12.47	11.27	6.32	0	0.69	0.59	0	0	0	1.19	0.6	0
Am_Tr_001065	588	XP_004499225.1_60S ribosomal protein L13a-4 [Cicer arietinum] XP_004499231.1 60S ribosomal protein L13a-4 [Cicer arietinum]	AT5G48760.1_Ribosomal protein L13 family protein	IPR005822_Ribosomal protein L13; IPR036899_Ribosomal protein L13 superfamily; IPR005755_Ribosomal protein L13, eukaryotic/archaeal	289.537	138.373	180.637	278.973	357.87	272.36	238.38	111.27	180.83	123.02	185.65	176.17	180.09	211.45	267.45	358.02
Am_Tr_001066	590	PNY07798.1_TVP38/TMEM64 family membrane protein slr0305-like protein, partial [Trifolium pratense]	AT5G19070.2_SNARE associated Golgi protein family	.	18.0267	29.1233	38.2533	28.6933	11.46	17.75	24.87	28.64	33.02	25.71	23.06	44.05	47.65	20.42	33.43	32.23
Am_Tr_001067	511	KAE9611096.1_60S ribosomal protein L13a [Lupinus albus]	AT3G07110.1_Ribosomal protein L13 family protein	.	13.7067	36.0267	17.2067	23.6367	14.22	22.27	4.63	39.8	33.74	34.54	2.98	23.35	25.29	20.67	20.17	30.07
Am_Tr_001068	291	.	.	.	0.786667	1.51333	1.04333	1.96	0	1.26	1.1	3.51	0	1.03	0.98	0	2.15	2.33	2.4	1.15
Am_Tr_001069	252	.	.	.	0.726667	1.62667	0.643333	0	0	2.18	0	0	4.88	0	0	1.93	0	0	0	0
Am_Tr_001070	332	PNX66840.1_60S ribosomal protein l13a-4-like, partial [Trifolium pratense]	AT5G48760.1_Ribosomal protein L13 family protein	.	136.573	93.3333	86.19	148.6	227.3	93.24	89.18	86.3	99.78	93.92	81.79	80.41	96.37	120.92	127.49	197.39
Am_Tr_001071	302	.	.	.	0	0	0.336667	0	0	0	0	0	0	0	0	1.01	0	0	0	0
Am_Tr_001072	818	PNY06461.1_GTP pyrophosphokinase, partial [Trifolium pratense] PNY14708.1 GTP pyrophosphokinase, partial [Trifolium pratense]	AT4G02260.3_RELA/SPOT homolog 1, GeneName=RSH1	.	16.5333	26.9967	16.31	14.0267	10.89	11.3	27.41	31.23	18.53	31.23	11.47	22.92	14.54	16.72	1.86	23.5
Am_Tr_001073	1490	XP_004494394.1_putative GTP diphosphokinase RSH1, chloroplastic isoform X3 [Cicer arietinum] XP_004494395.1 putative GTP diphosphokinase RSH1, chloroplastic isoform X1 [Cicer arietinum]	AT4G02260.3_RELA/SPOT homolog 1, GeneName=RSH1	IPR003607_HD/PDEase domain	0.286667	18.4333	9.25667	9.76667	0	0.86	0	15.48	13.74	26.08	4.57	12.15	11.05	9.03	8.54	11.73
Am_Tr_001074	772	XP_016187519.1_uncharacterized protein LOC107629283 [Arachis ipaensis] XP_025641667.1 uncharacterized protein LOC112736428 [Arachis hypogaea] QHN98596.1 Increased DNA methylation [Arachis hypogaea] RYR23352.1 hypothetical protein Ahy_B03g068587 isoform B [Arachis hypogaea]	AT2G37520.1_Acyl-CoA N-acyltransferase with RING/FYVE/PHD-type zinc finger domain-containing protein	.	2.15667	3.12667	2.62667	2.76667	4.54	1.22	0.71	5.02	1.95	2.41	2.01	3.66	2.21	2.7	4.22	1.38
Am_Tr_001075	722	XP_020959544.1_putative GTP diphosphokinase RSH1, chloroplastic isoform X2 [Arachis ipaensis]	AT4G02260.3_RELA/SPOT homolog 1, GeneName=RSH1	.	0	0.816667	0.616667	0	0	0	0	0	2.19	0.26	1.44	0.41	0	0	0	0
Am_Tr_001076	1023	PNY06461.1_GTP pyrophosphokinase, partial [Trifolium pratense] PNY14708.1 GTP pyrophosphokinase, partial [Trifolium pratense]	AT4G02260.3_RELA/SPOT homolog 1, GeneName=RSH1	.	18.8033	5.05333	5.68	4.59667	27.62	21.31	7.48	0	15.16	0	10.95	0	6.09	0	13.79	0
Am_Tr_001077	894	XP_020959544.1_putative GTP diphosphokinase RSH1, chloroplastic isoform X2 [Arachis ipaensis]	AT4G02260.3_RELA/SPOT homolog 1, GeneName=RSH1	.	0.0666667	1.22667	1.56	1.15333	0	0.2	0	2.14	0.46	1.08	2.07	0.95	1.66	1.05	1.17	1.24
Am_Tr_001078	940	PNY06461.1_GTP pyrophosphokinase, partial [Trifolium pratense] PNY14708.1 GTP pyrophosphokinase, partial [Trifolium pratense]	AT4G02260.3_RELA/SPOT homolog 1, GeneName=RSH1	.	5.99	0	4.56	7.49	0	0	17.97	0	0	0	0	13.68	0	3.33	0.06	19.08
Am_Tr_001079	406	.	.	.	12.6967	27.9867	19.4233	18.5567	15.58	15.61	6.9	17.68	39.61	26.67	9.54	28.05	20.68	21.89	21.35	12.43
Am_Tr_001080	735	PNY06461.1_GTP pyrophosphokinase, partial [Trifolium pratense] PNY14708.1 GTP pyrophosphokinase, partial [Trifolium pratense]	AT4G02260.3_RELA/SPOT homolog 1, GeneName=RSH1	.	28.0833	25.0233	13.1467	26.99	44.83	31.83	7.59	25.13	26.22	23.72	19.74	0.6	19.1	30.67	33.29	17.01
Am_Tr_001081	478	RYQ97928.1_hypothetical protein Ahy_B08g094004 isoform B [Arachis hypogaea]	AT2G37520.1_Acyl-CoA N-acyltransferase with RING/FYVE/PHD-type zinc finger domain-containing protein	.	0	0.246667	0	0.166667	0	0	0	0	0.74	0	0	0	0	0.5	0	0
Am_Tr_001082	488	KAE9587971.1_putative histone acetyltransferase chromatin regulator PHD family [Lupinus albus]	.	.	0	0	0	0	0	0	0	0	0	0	0	0	0	0	0	0
Am_Tr_001083	2818	XP_013450381.1_putative GTP diphosphokinase RSH1, chloroplastic [Medicago truncatula] KEH24409.1 RelA-SpoT-like protein RSH1 [Medicago truncatula] RHN48980.1 putative GTP diphosphokinase [Medicago truncatula]	AT4G02260.2_RELA/SPOT homolog 1, GeneName=RSH1	IPR007685_RelA/SpoT; IPR045865_ACT-like domain; IPR012676_TGS-like; IPR004095_TGS; IPR043519_Nucleotidyltransferase superfamily	4.16667	45.7833	17.84	12.7867	3.16	5.3	4.04	52.59	41.56	43.2	16.98	19.24	17.3	16.73	9.74	11.89
Am_Tr_001084	1410	XP_004494394.1_putative GTP diphosphokinase RSH1, chloroplastic isoform X3 [Cicer arietinum] XP_004494395.1 putative GTP diphosphokinase RSH1, chloroplastic isoform X1 [Cicer arietinum]	AT4G02260.3_RELA/SPOT homolog 1, GeneName=RSH1	IPR003607_HD/PDEase domain	1.35333	9.40333	0	0	1.84	1.44	0.78	16.68	11.53	0	0	0	0	0	0	0
Am_Tr_001085	1154	XP_027346491.1_MLO-like protein 10 isoform X3 [Abrus precatorius]	AT5G65970.2_Seven transmembrane MLO family protein, GeneName=MLO10	IPR004326_Mlo-related protein	2.78667	3.77667	4.78667	4.75	0.53	5.84	1.99	3.03	4.18	4.12	3.74	5.07	5.55	5.33	2.01	6.91
Am_Tr_001086	1867	MCH89773.1_vacuolar-sorting receptor 1-like [Trifolium medium]	AT3G52850.1_vacuolar sorting receptor homolog 1, GeneName=VSR1	.	1.53333	1.31667	1.47667	1.50333	0	4.6	0	0	3.95	0	0	4.43	0	0	4.51	0
Am_Tr_001087	1545	MCH89773.1_vacuolar-sorting receptor 1-like [Trifolium medium]	AT3G52850.1_vacuolar sorting receptor homolog 1, GeneName=VSR1	.	2.3	2.31	1.41	1.52	0	6.9	0	0	6.93	0	0	4.23	0	0	4.56	0
Am_Tr_001088	2582	XP_004492565.1_vacuolar-sorting receptor 1-like [Cicer arietinum]	AT3G52850.1_vacuolar sorting receptor homolog 1, GeneName=VSR1	IPR003137_PA domain; IPR001881_EGF-like calcium-binding domain	2.76667	10.5267	13.92	11.56	1.59	3.62	3.09	8.71	10.96	11.91	11.97	15.33	14.46	9.4	10.11	15.17
Am_Tr_001089	216	.	.	.	0	0	0	0	0	0	0	0	0	0	0	0	0	0	0	0
Am_Tr_001090	801	KAH1163112.1_hypothetical protein GYH30_001588 [Glycine max] KRH76327.1 hypothetical protein GLYMA_01G146300v4 [Glycine max]	AT1G67280.1_Glyoxalase/Bleomycin resistance protein/Dioxygenase superfamily protein	IPR004360_Glyoxalase/fosfomycin resistance/dioxygenase domain; IPR004361_Glyoxalase I; IPR029068_Glyoxalase/Bleomycin resistance protein/Dihydroxybiphenyl dioxygenase	4.32667	15.54	6.54	9.08667	4.65	4.98	3.35	15.42	14.45	16.75	4.23	8.66	6.73	5.88	11.2	10.18
Am_Tr_001091	1647	TKY52609.1_Basic 7S globulin 2 [Spatholobus suberectus]	AT1G03220.1_Eukaryotic aspartyl protease family protein	IPR032861_Xylanase inhibitor, N-terminal; IPR032799_Xylanase inhibitor, C-terminal; IPR021109_Aspartic peptidase domain superfamily	1535.54	5.61	229.29	19.28	290.73	625.77	3690.12	5.16	5.11	6.56	69.31	217.91	400.65	15.55	13.81	28.48
Am_Tr_001092	2315	TKY52609.1_Basic 7S globulin 2 [Spatholobus suberectus]	AT1G03220.1_Eukaryotic aspartyl protease family protein	IPR032799_Xylanase inhibitor, C-terminal; IPR021109_Aspartic peptidase domain superfamily; IPR032861_Xylanase inhibitor, N-terminal	454.437	10.4367	47.0367	21.5367	662.97	224.52	475.82	8.82	10.12	12.37	28.15	50.97	61.99	13.64	24.01	26.96
Am_Tr_001093	2150	TKY52609.1_Basic 7S globulin 2 [Spatholobus suberectus]	AT1G03220.1_Eukaryotic aspartyl protease family protein	IPR032799_Xylanase inhibitor, C-terminal; IPR032861_Xylanase inhibitor, N-terminal; IPR021109_Aspartic peptidase domain superfamily	0	0	0	0	0	0	0	0	0	0	0	0	0	0	0	0
Am_Tr_001094	1850	TKY52609.1_Basic 7S globulin 2 [Spatholobus suberectus]	AT1G03220.1_Eukaryotic aspartyl protease family protein	IPR032861_Xylanase inhibitor, N-terminal; IPR032799_Xylanase inhibitor, C-terminal; IPR021109_Aspartic peptidase domain superfamily	98.21	1.64	16.3933	3.11333	94.95	69.94	129.74	0.69	0.47	3.76	0.92	21.74	26.52	2.58	0.6	6.16
Am_Tr_001095	2353	TKY52609.1_Basic 7S globulin 2 [Spatholobus suberectus]	AT1G03220.1_Eukaryotic aspartyl protease family protein	IPR032799_Xylanase inhibitor, C-terminal; IPR021109_Aspartic peptidase domain superfamily; IPR032861_Xylanase inhibitor, N-terminal	7.01333	0	0	0	4.97	0	16.07	0	0	0	0	0	0	0	0	0
Am_Tr_001096	2112	TKY52609.1_Basic 7S globulin 2 [Spatholobus suberectus]	AT1G03220.1_Eukaryotic aspartyl protease family protein	IPR032799_Xylanase inhibitor, C-terminal; IPR032861_Xylanase inhibitor, N-terminal; IPR021109_Aspartic peptidase domain superfamily	0	0	0	0	0	0	0	0	0	0	0	0	0	0	0	0
Am_Tr_001097	2708	AFK42416.1_unknown [Lotus japonicus]	AT1G03220.1_Eukaryotic aspartyl protease family protein	IPR032799_Xylanase inhibitor, C-terminal; IPR032861_Xylanase inhibitor, N-terminal; IPR021109_Aspartic peptidase domain superfamily	774.343	8.89333	32.25	18.2167	659.35	874.1	789.58	4.43	7.68	14.57	13.99	32.08	50.68	15.27	10.85	28.53
Am_Tr_001098	777	PNX80683.1_methyltransferase-related protein [Trifolium pratense]	AT5G18150.1_Methyltransferase-related protein	.	14.3533	6.58333	8.45667	21.1033	3.21	27.29	12.56	6.61	6.91	6.23	6.7	8.87	9.8	31.05	15.61	16.65
Am_Tr_001099	651	TKY46192.1_hypothetical protein E2542_SST28230 [Spatholobus suberectus]	AT5G18150.1_Methyltransferase-related protein	.	0.8	0.19	0	0.483333	1.89	0.29	0.22	0.24	0.33	0	0	0	0	0.6	0.3	0.55
Am_Tr_001100	627	PNX80683.1_methyltransferase-related protein [Trifolium pratense]	AT5G14602.1_methyltransferase-like protein	.	0.07	0.0833333	0	0.336667	0	0	0.21	0	0	0.25	0	0	0	0.24	0.27	0.5
Am_Tr_001101	702	MCH94263.1_alpha-L-arabinofuranosidase-like protein [Trifolium medium]	AT3G10740.1_alpha-L-arabinofuranosidase 1, GeneName=ASD1	.	4.97	3.71667	4.81667	4.03333	7.87	7.04	0	5.03	6.12	0	5.96	8.49	0	5.88	6.22	0
Am_Tr_001102	999	MCH94263.1_alpha-L-arabinofuranosidase-like protein [Trifolium medium]	AT3G10740.1_alpha-L-arabinofuranosidase 1, GeneName=ASD1	IPR008979_Galactose-binding-like domain superfamily	0.11	0.756667	0.07	0.2	0.33	0	0	1.95	0	0.32	0	0	0.21	0.48	0	0.12
Am_Tr_001103	1735	MCH94263.1_alpha-L-arabinofuranosidase-like protein [Trifolium medium]	AT3G10740.1_alpha-L-arabinofuranosidase 1, GeneName=ASD1	IPR041577_Reverse transcriptase/retrotransposon-derived protein, RNase H-like domain; IPR043502_DNA/RNA polymerase superfamily	5.19333	4.03	6	3.32333	10.58	5	0	6.44	5.65	0	9.1	8.9	0	4.74	5.23	0
Am_Tr_001104	2429	XP_027353356.1_alpha-L-arabinofuranosidase 1-like isoform X1 [Abrus precatorius]	AT3G10740.2_alpha-L-arabinofuranosidase 1, GeneName=ASD1	IPR008979_Galactose-binding-like domain superfamily; IPR010720_Alpha-L-arabinofuranosidase, C-terminal; IPR017853_Glycoside hydrolase superfamily	27.7467	54.8367	89.18	82.1367	13.21	30.86	39.17	54.91	61.02	48.58	47.19	115.28	105.07	69.7	80.71	96
Am_Tr_001105	536	ACJ83789.1_unknown [Medicago truncatula]	AT3G10740.1_alpha-L-arabinofuranosidase 1, GeneName=ASD1	IPR010720_Alpha-L-arabinofuranosidase, C-terminal	1.51667	4.53667	4.98	4.45333	0.55	2.55	1.45	3.37	5.79	4.45	9.57	5.15	0.22	3.71	7.17	2.48
Am_Tr_001106	690	PNX78545.1_alpha-L-arabinofuranosidase 1-like protein [Trifolium pratense]	AT3G10740.1_alpha-L-arabinofuranosidase 1, GeneName=ASD1	.	0	0	0.716667	0	0	0	0	0	0	0	2.15	0	0	0	0	0
Am_Tr_001107	1115	XP_007162013.1_hypothetical protein PHAVU_001G116300g [Phaseolus vulgaris] ESW34007.1 hypothetical protein PHAVU_001G116300g [Phaseolus vulgaris]	AT3G10740.1_alpha-L-arabinofuranosidase 1, GeneName=ASD1	IPR017853_Glycoside hydrolase superfamily	0	0.103333	57.4967	0	0	0	0	0	0.31	0	117.39	31.87	23.23	0	0	0
Am_Tr_001108	2656	XP_004493305.1_alpha-L-arabinofuranosidase 1-like [Cicer arietinum]	AT3G10740.1_alpha-L-arabinofuranosidase 1, GeneName=ASD1	IPR010720_Alpha-L-arabinofuranosidase, C-terminal; IPR017853_Glycoside hydrolase superfamily	0.0133333	3.79	483.717	0.0133333	0.04	0	0	0	11.16	0.21	1069.12	216.98	165.05	0	0	0.04
Am_Tr_001109	2683	XP_004493305.1_alpha-L-arabinofuranosidase 1-like [Cicer arietinum]	AT5G26120.1_alpha-L-arabinofuranosidase 2, GeneName=ASD2	IPR010720_Alpha-L-arabinofuranosidase, C-terminal; IPR017853_Glycoside hydrolase superfamily	0	0.2	62.4467	0	0	0	0	0	0.6	0	135.22	31.75	20.37	0	0	0
Am_Tr_001110	1581	XP_027335159.1_uncharacterized protein LOC113849443 isoform X2 [Abrus precatorius]	AT1G01710.1_acyl-CoA thioesterase II	IPR029069_HotDog domain superfamily; IPR003703_Acyl-CoA thioesterase	3.28333	2.56667	5.01	2.61667	3.88	2.57	3.4	1.25	3.09	3.36	6.63	3.15	5.25	2.64	3.15	2.06
Am_Tr_001111	397	GAU44005.1_hypothetical protein TSUD_349370 [Trifolium subterraneum]	AT1G01710.1_acyl-CoA thioesterase II	IPR025652_Acyl-CoA thioesterase II domain; IPR029069_HotDog domain superfamily	4.86667	1.36	0.11	2.34	7.73	0	6.87	0	0	4.08	0.33	0	0	0.94	3.46	2.62
Am_Tr_001112	2704	XP_045789096.1_acyl-CoA thioesterase 2-like [Trifolium pratense]	AT1G01710.1_acyl-CoA thioesterase II	.	0.11	0.433333	0.32	0.206667	0	0.33	0	0	0.5	0.8	0.28	0	0.68	0	0.61	0.01
Am_Tr_001113	2891	GAU44005.1_hypothetical protein TSUD_349370 [Trifolium subterraneum]	AT1G01710.1_acyl-CoA thioesterase II	.	0.146667	1.34667	0.426667	0.25	0	0.44	0	0	0.91	3.13	0.59	0	0.69	0.38	0.23	0.14
Am_Tr_001114	1768	XP_027335159.1_uncharacterized protein LOC113849443 isoform X2 [Abrus precatorius]	AT1G01710.1_acyl-CoA thioesterase II	IPR029069_HotDog domain superfamily	0.453333	2.22333	0.393333	0.55	1.07	0	0.29	1.79	2.8	2.08	0	1.18	0	1.27	0	0.38
Am_Tr_001115	2758	XP_027335159.1_uncharacterized protein LOC113849443 isoform X2 [Abrus precatorius]	AT1G01710.1_acyl-CoA thioesterase II	IPR029069_HotDog domain superfamily	0.213333	1.2	0.693333	0.00333333	0	0.34	0.3	0.01	1.25	2.34	0.26	1.13	0.69	0	0	0.01
Am_Tr_001116	3439	XP_027335159.1_uncharacterized protein LOC113849443 isoform X2 [Abrus precatorius]	AT1G01710.1_acyl-CoA thioesterase II	IPR029069_HotDog domain superfamily	0.206667	0.463333	0	0.41	0.16	0.46	0	0.46	0.55	0.38	0	0	0	0.67	0.26	0.3
Am_Tr_001117	3037	RZB53512.1_Acyl-CoA thioesterase 2 isoform A, partial [Glycine soja]	AT1G01710.1_acyl-CoA thioesterase II	.	0.723333	0.18	0.0766667	0.433333	0.27	0.97	0.93	0	0.14	0.4	0	0	0.23	0	0.72	0.58
Am_Tr_001118	1806	XP_015961718.1_uncharacterized protein LOC107485707 isoform X2 [Arachis duranensis]	AT1G01710.1_acyl-CoA thioesterase II	IPR018490_Cyclic nucleotide-binding-like; IPR000595_Cyclic nucleotide-binding domain	0.613333	0.16	1.04667	1.79667	0.09	1.03	0.72	0	0	0.48	1.9	0.12	1.12	0.56	1.2	3.63
Am_Tr_001119	1328	XP_028247860.1_acyl-coenzyme A thioesterase 8-like [Glycine soja]	AT1G01710.1_acyl-CoA thioesterase II	.	0.17	0.683333	0.166667	0.49	0.15	0	0.36	0.57	0.48	1	0	0	0.5	0.32	0	1.15
Am_Tr_001120	2571	XP_027335159.1_uncharacterized protein LOC113849443 isoform X2 [Abrus precatorius]	AT1G01710.1_acyl-CoA thioesterase II	IPR029069_HotDog domain superfamily	0.266667	0.83	0.0766667	0.393333	0.25	0.55	0	1.26	1.23	0	0.13	0.1	0	0	0	1.18
Am_Tr_001121	1619	XP_027350564.1_uncharacterized protein LOC113861748 isoform X2 [Abrus precatorius]	AT1G01710.1_acyl-CoA thioesterase II	IPR025652_Acyl-CoA thioesterase II domain; IPR029069_HotDog domain superfamily	2.05667	5.83667	1.26333	1.69	1.07	3.37	1.73	4.35	5.2	7.96	0	2.2	1.59	3.23	1.83	0.01
Am_Tr_001122	3293	XP_027335159.1_uncharacterized protein LOC113849443 isoform X2 [Abrus precatorius]	AT1G01710.1_acyl-CoA thioesterase II	IPR029069_HotDog domain superfamily	0.423333	1.57667	0.296667	0.89	0	1.27	0	2.16	2.01	0.56	0	0.82	0.07	0.27	1.43	0.97
Am_Tr_001123	3106	XP_027335159.1_uncharacterized protein LOC113849443 isoform X2 [Abrus precatorius]	AT1G01710.1_acyl-CoA thioesterase II	IPR029069_HotDog domain superfamily	0.0433333	1.33667	0.206667	0.0466667	0	0.13	0	1.92	1.44	0.65	0	0.59	0.03	0	0	0.14
Am_Tr_001124	2840	XP_016178869.1_uncharacterized protein LOC107621346 isoform X2 [Arachis ipaensis]	AT1G01710.1_acyl-CoA thioesterase II	IPR029069_HotDog domain superfamily; IPR025652_Acyl-CoA thioesterase II domain	0.163333	0.146667	0.36	0.55	0	0.49	0	0	0.31	0.13	0.48	0.6	0	0.57	0.01	1.07
Am_Tr_001125	1886	KAG4377921.1_hypothetical protein GLYMA_18G232000v4 [Glycine max] KAH1155787.1 hypothetical protein GYH30_050869 [Glycine max]	AT1G01710.1_acyl-CoA thioesterase II	IPR018490_Cyclic nucleotide-binding-like; IPR000595_Cyclic nucleotide-binding domain; IPR029069_HotDog domain superfamily	0.436667	0	0	0	0	0	1.31	0	0	0	0	0	0	0	0	0
Am_Tr_001126	2879	XP_016178869.1_uncharacterized protein LOC107621346 isoform X2 [Arachis ipaensis]	AT1G01710.1_acyl-CoA thioesterase II	.	0.226667	0.776667	0.103333	0.0866667	0.27	0	0.41	0.54	1	0.79	0	0.31	0	0	0.26	0
Am_Tr_001127	1847	KAG4377921.1_hypothetical protein GLYMA_18G232000v4 [Glycine max] KAH1155787.1 hypothetical protein GYH30_050869 [Glycine max]	AT1G01710.1_acyl-CoA thioesterase II	IPR000595_Cyclic nucleotide-binding domain; IPR018490_Cyclic nucleotide-binding-like; IPR029069_HotDog domain superfamily	0.57	0.23	0.466667	0.21	0	0.12	1.59	0	0	0.69	0.51	0.63	0.26	0.05	0.58	0
Am_Tr_001128	1815	XP_027350563.1_uncharacterized protein LOC113861748 isoform X1 [Abrus precatorius]	AT1G01710.1_acyl-CoA thioesterase II	IPR003703_Acyl-CoA thioesterase; IPR000595_Cyclic nucleotide-binding domain; IPR029069_HotDog domain superfamily; IPR018490_Cyclic nucleotide-binding-like	57.9633	26.5433	33.6	50.3033	66	46.59	61.3	22.37	30.03	27.23	33.65	33.94	33.21	50.11	49.6	51.2
Am_Tr_001129	2889	RYR61145.1_hypothetical protein Ahy_A04g018271 [Arachis hypogaea]	AT1G01710.1_acyl-CoA thioesterase II	IPR029069_HotDog domain superfamily; IPR025652_Acyl-CoA thioesterase II domain	0.113333	0.623333	0.4	0.363333	0	0.21	0.13	0.76	0.44	0.67	0.64	0.16	0.4	0.39	0.34	0.36
Am_Tr_001130	2808	XP_027350564.1_uncharacterized protein LOC113861748 isoform X2 [Abrus precatorius]	AT1G01710.1_acyl-CoA thioesterase II	IPR029069_HotDog domain superfamily; IPR025652_Acyl-CoA thioesterase II domain	0.143333	0.553333	0.69	1.16667	0.15	0.28	0	1.02	0.62	0.02	0.69	0.34	1.04	1.61	1.22	0.67
Am_Tr_001131	424	XP_021831352.1_alpha-L-arabinofuranosidase 1-like isoform X1 [Prunus avium]	AT3G10740.1_alpha-L-arabinofuranosidase 1, GeneName=ASD1	.	0	0.15	0.386667	0.303333	0	0	0	0.45	0	0	0.76	0	0.4	0.91	0	0
Am_Tr_001132	431	XP_021831352.1_alpha-L-arabinofuranosidase 1-like isoform X1 [Prunus avium]	AT3G10740.1_alpha-L-arabinofuranosidase 1, GeneName=ASD1	.	0	0	0.263333	0.146667	0	0	0	0	0	0	0.37	0.42	0	0	0	0.44
Am_Tr_001133	605	.	.	.	0.25	0.79	0.433333	0.576667	0.75	0	0	0.96	0.55	0.86	0.41	0.47	0.42	0.49	0.75	0.49
Am_Tr_001134	1736	GAU44116.1_hypothetical protein TSUD_124030 [Trifolium subterraneum]	AT1G65720.1_transmembrane protein	.	89.8067	95.97	166.66	111.687	78.63	103.86	86.93	83.17	96.25	108.49	152.37	181.68	165.93	98.7	119.18	117.18
Am_Tr_001135	1954	XP_003594497.1_peroxidase 15 [Medicago truncatula] AES64748.1 peroxidase family protein [Medicago truncatula] RHN72854.1 putative peroxidase [Medicago truncatula]	AT5G06730.1_Peroxidase superfamily protein	.	1.60667	3.38	2.56	3.37	1.61	1.76	1.45	2.14	2.86	5.14	2.07	1.96	3.65	3.81	2.81	3.49
Am_Tr_001136	1334	XP_012569970.1_peroxidase A2 [Cicer arietinum] AII99877.1 peroxidase [Cicer arietinum]	AT5G06730.1_Peroxidase superfamily protein	IPR010255_Haem peroxidase superfamily; IPR000823_Plant peroxidase; IPR002016_Haem peroxidase	0.393333	0.573333	1.86333	2.07	0.26	0.78	0.14	0.42	0.85	0.45	2.72	1.05	1.82	1.71	0.88	3.62
Am_Tr_001137	1439	XP_012569970.1_peroxidase A2 [Cicer arietinum] AII99877.1 peroxidase [Cicer arietinum]	AT5G06720.1_peroxidase 2, GeneName=PA2	IPR010255_Haem peroxidase superfamily; IPR002016_Haem peroxidase; IPR000823_Plant peroxidase	0	0	0	0	0	0	0	0	0	0	0	0	0	0	0	0
Am_Tr_001138	406	MCH86586.1_peroxidase [Trifolium medium]	AT5G06730.1_Peroxidase superfamily protein	IPR002016_Haem peroxidase; IPR010255_Haem peroxidase superfamily; IPR000823_Plant peroxidase	0	0	0	0	0	0	0	0	0	0	0	0	0	0	0	0
Am_Tr_001139	1849	GAU43774.1_hypothetical protein TSUD_377990 [Trifolium subterraneum]	AT5G06730.1_Peroxidase superfamily protein	.	0	0	0	0	0	0	0	0	0	0	0	0	0	0	0	0
Am_Tr_001140	1673	PNX72434.1_peroxidase [Trifolium pratense]	AT5G06730.1_Peroxidase superfamily protein	IPR000823_Plant peroxidase; IPR010255_Haem peroxidase superfamily; IPR002016_Haem peroxidase	31.1633	69.4167	216.277	350.973	15.22	55.05	23.22	69.05	71.4	67.8	189.15	195.51	264.17	446.58	278.59	327.75
Am_Tr_001141	243	.	.	.	0	0	0	0.786667	0	0	0	0	0	0	0	0	0	0	2.36	0
Am_Tr_001142	477	.	.	.	0	0	0	0	0	0	0	0	0	0	0	0	0	0	0	0
Am_Tr_001143	414	.	.	.	0	0	0.266667	0	0	0	0	0	0	0	0.8	0	0	0	0	0
Am_Tr_001144	3421	XP_004497219.1_lysine-specific demethylase JMJ25-like isoform X1 [Cicer arietinum]	AT3G07610.1_Transcription factor jumonji (jmjC) domain-containing protein, GeneName=IBM1	IPR003347_JmjC domain; IPR018866_Zinc-finger domain of monoamine-oxidase A repressor R1	3.73333	4.11333	5.45667	3.91	4.84	3.69	2.67	3.43	4.52	4.39	3.73	7.1	5.54	4.07	3.95	3.71
Am_Tr_001145	1328	RDX93087.1_Lysine-specific demethylase JMJ25, partial [Mucuna pruriens]	AT3G07610.1_Transcription factor jumonji (jmjC) domain-containing protein, GeneName=IBM1	IPR003347_JmjC domain	0.866667	1.20667	2.73667	2.23667	0.64	1.63	0.33	0.87	1.23	1.52	3.45	2.68	2.08	2.53	2.17	2.01
Am_Tr_001146	2348	XP_004497219.1_lysine-specific demethylase JMJ25-like isoform X1 [Cicer arietinum]	AT3G07610.1_Transcription factor jumonji (jmjC) domain-containing protein, GeneName=IBM1	IPR003347_JmjC domain	4.19333	6.74	6.20667	5.76333	5.67	3.94	2.97	8.14	6.07	6.01	4.66	7.13	6.83	4.6	5.97	6.72
Am_Tr_001147	3458	XP_004497219.1_lysine-specific demethylase JMJ25-like isoform X1 [Cicer arietinum]	AT3G07610.1_Transcription factor jumonji (jmjC) domain-containing protein, GeneName=IBM1	IPR003347_JmjC domain; IPR018866_Zinc-finger domain of monoamine-oxidase A repressor R1	3.52667	6.51	3	5.06333	3.88	2.33	4.37	6.75	6.76	6.02	1.73	3.14	4.13	3.56	4.53	7.1
Am_Tr_001148	225	PNX81004.1_lysine-specific demethylase 3B, partial [Trifolium pratense]	AT1G62310.1_transcription factor jumonji (jmjC) domain-containing protein	.	0	0	0	0	0	0	0	0	0	0	0	0	0	0	0	0
Am_Tr_001149	483	XP_027189653.1_LOW QUALITY PROTEIN: lysine-specific demethylase JMJ25-like [Cicer arietinum]	.	.	0.246667	2.51	3.55333	2.27	0.37	0.37	0	2.44	3.21	1.88	4.78	3.39	2.49	1.43	1.46	3.92
Am_Tr_001150	211	ACU19276.1_unknown [Glycine max]	AT1G62310.1_transcription factor jumonji (jmjC) domain-containing protein	.	0	1.68333	5.78	4.88667	0	0	0	5.05	0	0	12.5	0	4.84	0	9.97	4.69
Am_Tr_001151	508	MCH94080.1_glutathione S-transferase amino-terminal domain protein [Trifolium medium]	AT5G03880.1_Thioredoxin family protein	.	0.113333	1.09333	1.08333	1.23667	0	0.34	0	1.28	0	2	0	1.55	1.7	1.63	1.25	0.83
Am_Tr_001152	515	.	.	.	0	0.476667	1.24667	0.396667	0	0	0	0	1.43	0	3.74	0	0	0	0.41	0.78
Am_Tr_001153	265	.	.	.	0	0	0	0	0	0	0	0	0	0	0	0	0	0	0	0
Am_Tr_001154	2101	XP_020222820.1_protein ABA DEFICIENT 4, chloroplastic [Cajanus cajan]	AT1G67080.1_abscisic acid (aba)-deficient 4, GeneName=ABA4	.	0	1.03667	4.89	0.366667	0	0	0	1.19	1.46	0.46	0.63	9.43	4.61	1.1	0	0
Am_Tr_001155	3197	XP_020222820.1_protein ABA DEFICIENT 4, chloroplastic [Cajanus cajan]	AT1G67080.1_abscisic acid (aba)-deficient 4, GeneName=ABA4	.	0.0366667	0.08	0.733333	0.426667	0	0.11	0	0	0	0.24	0	0.46	1.74	0.85	0.43	0
Am_Tr_001156	2945	XP_020222820.1_protein ABA DEFICIENT 4, chloroplastic [Cajanus cajan]	AT1G67080.1_abscisic acid (aba)-deficient 4, GeneName=ABA4	.	0.02	2.48333	28.2933	1.11333	0	0	0.06	0.56	2.56	4.33	27.8	32.72	24.36	2.76	0.5	0.08
Am_Tr_001157	920	XP_020222820.1_protein ABA DEFICIENT 4, chloroplastic [Cajanus cajan]	AT1G67080.1_abscisic acid (aba)-deficient 4, GeneName=ABA4	IPR025461_ABA DEFICIENT 4-like	0	0.523333	2.28333	0.276667	0	0	0	1.57	0	0	0.67	2.41	3.77	0.29	0.54	0
Am_Tr_001158	3458	XP_020222820.1_protein ABA DEFICIENT 4, chloroplastic [Cajanus cajan]	AT1G67080.1_abscisic acid (aba)-deficient 4, GeneName=ABA4	.	0	0.34	5.12	0.103333	0	0	0	0	0.51	0.51	4.11	7.02	4.23	0	0	0.31
Am_Tr_001159	2684	XP_020222820.1_protein ABA DEFICIENT 4, chloroplastic [Cajanus cajan]	AT1G67080.1_abscisic acid (aba)-deficient 4, GeneName=ABA4	IPR025461_ABA DEFICIENT 4-like	0.0966667	8.82	75.5933	0.813333	0	0.29	0	3.1	9.2	14.16	58.12	106	62.66	0.15	0.68	1.61
Am_Tr_001160	1431	XP_013447464.1_protein ABA DEFICIENT 4, chloroplastic [Medicago truncatula] KEH21545.1 neoxanthin synthase [Medicago truncatula] RHN44080.1 putative neoxanthin synthase [Medicago truncatula]	AT1G67080.1_abscisic acid (aba)-deficient 4, GeneName=ABA4	IPR025461_ABA DEFICIENT 4-like	1.09333	7.89667	11.4533	7.46	0.81	1.59	0.88	5.79	10.23	7.67	12.04	11.07	11.25	6.48	6.62	9.28
Am_Tr_001161	1303	XP_013447464.1_protein ABA DEFICIENT 4, chloroplastic [Medicago truncatula] KEH21545.1 neoxanthin synthase [Medicago truncatula] RHN44080.1 putative neoxanthin synthase [Medicago truncatula]	AT1G67080.1_abscisic acid (aba)-deficient 4, GeneName=ABA4	IPR025461_ABA DEFICIENT 4-like	0.113333	0.72	0.42	0.556667	0	0	0.34	0.25	0.97	0.94	0.45	0.43	0.38	0.48	0.22	0.97
Am_Tr_001162	564	.	.	.	0.493333	0.363333	0.25	0.366667	0	0.56	0.92	0.54	0.31	0.24	0.23	0.52	0	0.27	0.28	0.55
Am_Tr_001163	3102	XP_027361651.1_F-box protein CPR1 isoform X2 [Abrus precatorius]	AT1G50870.1_F-box and associated interaction domains-containing protein	IPR036047_F-box-like domain superfamily; IPR001810_F-box domain; IPR017451_F-box associated interaction domain	3.72	2.74333	2.68	2.86333	4.62	3.5	3.04	2.54	3.19	2.5	1.52	3.17	3.35	2.16	2.75	3.68
Am_Tr_001164	1556	XP_020223996.1_protein ABA DEFICIENT 4, chloroplastic [Cajanus cajan]	.	.	0.333333	0.856667	0.843333	1.27	0.92	0	0.08	0.57	0.9	1.1	0.66	0.95	0.92	0.81	2	1
Am_Tr_001165	221	.	.	.	1.41	1.09667	1.21	1.67	0	4.23	0	0	0	3.29	0	0	3.63	0	5.01	0
Am_Tr_001166	225	.	.	.	0	1.43667	0	1.48667	0	0	0	0	4.31	0	0	0	0	0	4.46	0
Am_Tr_001167	216	.	.	.	0	0	0	0	0	0	0	0	0	0	0	0	0	0	0	0
Am_Tr_001168	1319	.	.	.	0.106667	1.23667	1.89667	1.02667	0.09	0.09	0.14	1.01	1.71	0.99	1.01	2.09	2.59	1.48	0.81	0.79
Am_Tr_001169	225	.	.	.	1.27	0	1.68667	1.08667	0	3.81	0	0	0	0	0	5.06	0	0	0	3.26
Am_Tr_001170	4282	MCH80338.1_Ty-3/gypsy retroelement polyprotein [Trifolium medium]	.	IPR016197_Chromo-like domain superfamily; IPR023780_Chromo domain	0.0366667	0.0666667	0.17	12.24	0.05	0.02	0.04	0	0.03	0.17	0.08	0.13	0.3	21.22	6.27	9.23
Am_Tr_001171	1153	PNX61539.1_hypothetical protein L195_g060710, partial [Trifolium pratense]	.	.	0.343333	0.113333	0.12	0.413333	0.72	0.31	0	0	0.34	0	0.26	0.1	0	0.82	0.42	0
Am_Tr_001172	351	AES74709.1_hypothetical protein MTR_6g012230 [Medicago truncatula]	.	.	0	0	0	0.473333	0	0	0	0	0	0	0	0	0	0	1.42	0
Am_Tr_001173	480	KEH17359.1_hypothetical protein MTR_0020s0050 [Medicago truncatula]	.	.	1.35667	0	0.456667	0.36	3.33	0.74	0	0	0	0	0	1.37	0	1.08	0	0
Am_Tr_001174	325	.	.	.	0	0	0	0.57	0	0	0	0	0	0	0	0	0	0.84	0.87	0
Am_Tr_001175	308	.	.	.	0	0	0	0	0	0	0	0	0	0	0	0	0	0	0	0
Am_Tr_001176	1772	PNX95346.1_charged multivesicular body protein 7-like, partial [Trifolium pratense]	AT3G62080.1_SNF7 family protein	IPR005024_Snf7 family	3.23333	6.46	5.25	6.49667	5.56	4.04	0.1	8.21	8.37	2.8	5.09	5.76	4.9	5.04	8.28	6.17
Am_Tr_001177	1803	XP_045796781.1_uncharacterized protein LOC123891039 [Trifolium pratense]	AT3G62080.1_SNF7 family protein	IPR005024_Snf7 family	1.39667	2.68667	1.68333	1.25667	0	0	4.19	1.22	1.66	5.18	2.94	0.9	1.21	1.39	0.82	1.56
Am_Tr_001178	1653	XP_045796781.1_uncharacterized protein LOC123891039 [Trifolium pratense]	AT3G62080.2_SNF7 family protein	.	2.57333	6.83667	3.75667	6.53	1.8	3.34	2.58	5.35	6.83	8.33	1.32	4.3	5.65	3.85	7.13	8.61
Am_Tr_001179	1480	GAU11365.1_hypothetical protein TSUD_343560 [Trifolium subterraneum]	AT3G62080.1_SNF7 family protein	.	0.1	0.123333	0.0966667	0.27	0.3	0	0	0.21	0.16	0	0	0.29	0	0.19	0.44	0.18
Am_Tr_001180	248	.	.	.	0	2.62333	8.82667	0	0	0	0	0	7.87	0	0	12.43	14.05	0	0	0
Am_Tr_001181	1109	.	.	.	0.55	2.15667	15.5467	0.106667	0	0.87	0.78	0.73	2.36	3.38	0.63	21.88	24.13	0.32	0	0
Am_Tr_001182	2224	XP_039688999.1_E3 UFM1-protein ligase 1 homolog [Medicago truncatula] RHN60871.1 putative E3 UFM1-protein ligase 1 [Medicago truncatula]	AT3G46220.4_E3 UFM1-protein ligase-like protein	.	0.646667	0.136667	0.0866667	0.313333	0.23	0.55	1.16	0	0	0.41	0	0	0.26	0	0.41	0.53
Am_Tr_001183	4391	PNX92282.1_E3 ufm1-protein ligase 1 [Trifolium pratense]	AT3G46220.4_E3 UFM1-protein ligase-like protein	.	0	0	0.00333333	0	0	0	0	0	0	0	0.01	0	0	0	0	0
Am_Tr_001184	1902	XP_039688999.1_E3 UFM1-protein ligase 1 homolog [Medicago truncatula] RHN60871.1 putative E3 UFM1-protein ligase 1 [Medicago truncatula]	AT3G46220.4_E3 UFM1-protein ligase-like protein	.	0.366667	0.16	0.15	0.73	0	0.07	1.03	0	0.48	0	0.34	0.11	0	0.73	0.51	0.95
Am_Tr_001185	2938	XP_039688999.1_E3 UFM1-protein ligase 1 homolog [Medicago truncatula] RHN60871.1 putative E3 UFM1-protein ligase 1 [Medicago truncatula]	AT3G46220.4_E3 UFM1-protein ligase-like protein	.	1.49333	1.19333	1.23667	2.17667	0.97	1.53	1.98	0.82	1.9	0.86	0.42	2.02	1.27	1.8	2.14	2.59
Am_Tr_001186	4016	XP_023914227.1_E3 UFM1-protein ligase 1 homolog [Quercus suber]	AT3G46220.3_E3 UFM1-protein ligase-like protein	.	0.49	0.65	0.313333	0.553333	0.29	0.87	0.31	0.84	0.49	0.62	0	0.87	0.07	0.71	0.67	0.28
Am_Tr_001187	2243	XP_039688999.1_E3 UFM1-protein ligase 1 homolog [Medicago truncatula] RHN60871.1 putative E3 UFM1-protein ligase 1 [Medicago truncatula]	AT3G46220.4_E3 UFM1-protein ligase-like protein	IPR018611_E3 UFM1-protein ligase 1	13.68	16.8333	12.1	18.1133	12.61	15.93	12.5	12.19	20.61	17.7	3.4	17.25	15.65	10.4	18.5	25.44
Am_Tr_001188	2990	XP_023914227.1_E3 UFM1-protein ligase 1 homolog [Quercus suber]	AT3G46220.3_E3 UFM1-protein ligase-like protein	.	0.58	0	0	0	1.02	0	0.72	0	0	0	0	0	0	0	0	0
Am_Tr_001189	2414	XP_039688999.1_E3 UFM1-protein ligase 1 homolog [Medicago truncatula] RHN60871.1 putative E3 UFM1-protein ligase 1 [Medicago truncatula]	AT3G46220.4_E3 UFM1-protein ligase-like protein	.	0	0.276667	0.233333	0.193333	0	0	0	0.61	0.22	0	0	0.22	0.48	0.19	0	0.39
Am_Tr_001190	2201	XP_039688999.1_E3 UFM1-protein ligase 1 homolog [Medicago truncatula] RHN60871.1 putative E3 UFM1-protein ligase 1 [Medicago truncatula]	AT3G46220.4_E3 UFM1-protein ligase-like protein	.	0.766667	1.04667	0.51	0.283333	0.97	0.92	0.41	0.32	2.37	0.45	0.42	0.65	0.46	0.65	0	0.2
Am_Tr_001191	2328	XP_039688999.1_E3 UFM1-protein ligase 1 homolog [Medicago truncatula] RHN60871.1 putative E3 UFM1-protein ligase 1 [Medicago truncatula]	AT3G46220.4_E3 UFM1-protein ligase-like protein	.	0.713333	0.486667	0.563333	0.0866667	0.9	0.27	0.97	0.52	0.53	0.41	0.5	1	0.19	0	0.26	0
Am_Tr_001192	3414	XP_039688999.1_E3 UFM1-protein ligase 1 homolog [Medicago truncatula] RHN60871.1 putative E3 UFM1-protein ligase 1 [Medicago truncatula]	AT3G46220.4_E3 UFM1-protein ligase-like protein	.	0.206667	0.616667	0.746667	0.586667	0	0.14	0.48	0.76	0.05	1.04	0.8	0.76	0.68	0.88	0.84	0.04
Am_Tr_001193	2013	XP_039688999.1_E3 UFM1-protein ligase 1 homolog [Medicago truncatula] RHN60871.1 putative E3 UFM1-protein ligase 1 [Medicago truncatula]	AT3G46220.3_E3 UFM1-protein ligase-like protein	.	15.2033	19.1967	19.5	22.4633	13.08	15.84	16.69	18.03	20.18	19.38	21.02	19.18	18.3	23.78	21.59	22.02
Am_Tr_001194	1983	XP_039688999.1_E3 UFM1-protein ligase 1 homolog [Medicago truncatula] RHN60871.1 putative E3 UFM1-protein ligase 1 [Medicago truncatula]	AT3G46220.4_E3 UFM1-protein ligase-like protein	.	0.296667	0.226667	0.283333	0.0866667	0.31	0.26	0.32	0.12	0.56	0	0	0.61	0.24	0	0.26	0
Am_Tr_001195	1685	XP_039688999.1_E3 UFM1-protein ligase 1 homolog [Medicago truncatula] RHN60871.1 putative E3 UFM1-protein ligase 1 [Medicago truncatula]	AT3G46220.4_E3 UFM1-protein ligase-like protein	.	0.263333	0.963333	0.556667	0.42	0.39	0.4	0	0.78	1	1.11	0	0.53	1.14	0	0.35	0.91
Am_Tr_001196	4492	PNX92282.1_E3 ufm1-protein ligase 1 [Trifolium pratense]	AT3G46220.4_E3 UFM1-protein ligase-like protein	.	0.213333	0.246667	0.0933333	0.186667	0.38	0.15	0.11	0.01	0.72	0.01	0	0.1	0.18	0.06	0.14	0.36
Am_Tr_001197	3915	XP_023914227.1_E3 UFM1-protein ligase 1 homolog [Quercus suber]	AT3G46220.3_E3 UFM1-protein ligase-like protein	.	0	0	0.0566667	0	0	0	0	0	0	0	0.17	0	0	0	0	0
Am_Tr_001198	1132	XP_045822450.1_uncharacterized protein LOC123915367 [Trifolium pratense]	AT4G27300.1_S-locus lectin protein kinase family protein	.	0.0766667	1.99333	0.456667	0.553333	0	0	0.23	1.84	2.46	1.68	0.12	0.19	1.06	0.73	0.2	0.73
Am_Tr_001199	1495	TKY54346.1_NRT1/ PTR FAMILY 8.1 [Spatholobus suberectus]	AT5G17250.1_Alkaline-phosphatase-like family protein	.	0.0566667	0	0.11	0.24	0	0	0.17	0	0	0	0.33	0	0	0	0	0.72
Am_Tr_001200	1609	RDX87788.1_Protein NRT1/ PTR FAMILY 4.6, partial [Mucuna pruriens]	AT5G17250.1_Alkaline-phosphatase-like family protein	.	0.223333	0	0.463333	0.546667	0.67	0	0	0	0	0	0.91	0.16	0.32	0.9	0.3	0.44
Am_Tr_001201	2231	XP_020226813.1_GPI ethanolamine phosphate transferase 3 isoform X3 [Cajanus cajan]	AT5G17250.1_Alkaline-phosphatase-like family protein	.	3.97333	14.0533	8.79667	13.1533	3.98	6.61	1.33	14.05	14.01	14.1	8.45	9.82	8.12	12.13	12.94	14.39
Am_Tr_001202	1475	KAG4970303.1_hypothetical protein JHK85_036724 [Glycine max] KAG4976707.1 hypothetical protein JHK86_036181 [Glycine max] KAG5112723.1 hypothetical protein JHK82_035992 [Glycine max] KAG5130002.1 hypothetical protein JHK84_036399 [Glycine max]	AT5G17250.1_Alkaline-phosphatase-like family protein	.	1.35	2.09	4.57	3.88	1.24	1.73	1.08	1.37	3.16	1.74	6.39	3.83	3.49	2.58	4.06	5
Am_Tr_001203	3000	TKY54346.1_NRT1/ PTR FAMILY 8.1 [Spatholobus suberectus]	AT5G17250.1_Alkaline-phosphatase-like family protein	.	0.343333	0.5	0.33	0.34	0.53	0	0.5	0.58	0.5	0.42	0.35	0.28	0.36	0.2	0.51	0.31
Am_Tr_001204	2766	RZB53079.1_SUMO-conjugating enzyme UBC9 isoform A [Glycine soja] RZB53081.1 SUMO-conjugating enzyme UBC9 isoform C [Glycine soja]	AT5G41700.3_ubiquitin conjugating enzyme 8, GeneName=UBC8	IPR016135_Ubiquitin-conjugating enzyme/RWD-like; IPR000608_Ubiquitin-conjugating enzyme E2	95.2367	19.4967	12.3467	39.6	211.74	73.74	0.23	27.9	28.55	2.04	15.23	20.72	1.09	55.91	60.69	2.2
Am_Tr_001205	2569	RZB53079.1_SUMO-conjugating enzyme UBC9 isoform A [Glycine soja] RZB53081.1 SUMO-conjugating enzyme UBC9 isoform C [Glycine soja]	AT5G41700.3_ubiquitin conjugating enzyme 8, GeneName=UBC8	IPR016135_Ubiquitin-conjugating enzyme/RWD-like; IPR000608_Ubiquitin-conjugating enzyme E2	188.093	46.9967	29.0767	97.65	270.99	97.87	195.42	37.79	39.03	64.17	17.08	25.75	44.4	80.09	94.41	118.45
Am_Tr_001206	1120	XP_019412795.1_PREDICTED: ubiquitin-conjugating enzyme E2 28-like [Lupinus angustifolius] XP_019412796.1 PREDICTED: ubiquitin-conjugating enzyme E2 28-like [Lupinus angustifolius] OIV98541.1 hypothetical protein TanjilG_12127 [Lupinus angustifolius]	AT1G64230.1_ubiquitin-conjugating enzyme 28, GeneName=UBC28	IPR016135_Ubiquitin-conjugating enzyme/RWD-like; IPR000608_Ubiquitin-conjugating enzyme E2	1310.55	232.67	181.187	619.32	2234.55	777.94	919.15	248.91	220.34	228.76	207.41	175.41	160.74	735.98	676.38	445.6
Am_Tr_001207	1189	KAG6738172.1_hypothetical protein POTOM_059735 [Populus tomentosa]	AT1G64230.1_ubiquitin-conjugating enzyme 28, GeneName=UBC28	IPR000608_Ubiquitin-conjugating enzyme E2; IPR016135_Ubiquitin-conjugating enzyme/RWD-like	5.14	2.45667	3.56667	3.82333	6.37	4.49	4.56	1.05	3.03	3.29	4.57	3.18	2.95	3.66	4.38	3.43
Am_Tr_001208	2825	KAH0896882.1_hypothetical protein HID58_046450 [Brassica napus]	AT5G41700.3_ubiquitin conjugating enzyme 8, GeneName=UBC8	.	0.296667	0.576667	1.21	0.433333	0.42	0.18	0.29	0.3	0.52	0.91	1.47	0.72	1.44	0.4	0.09	0.81
Am_Tr_001209	489	XP_027340407.1_methyltransferase-like protein 22 isoform X1 [Abrus precatorius]	AT1G79915.2_Putative methyltransferase family protein	.	0	0.903333	1.24333	1.13	0	0	0	1.41	0.51	0.79	1.18	1.37	1.18	1.25	0	2.14
Am_Tr_001210	1196	XP_027340407.1_methyltransferase-like protein 22 isoform X1 [Abrus precatorius]	AT1G79915.2_Putative methyltransferase family protein	IPR029063_S-adenosyl-L-methionine-dependent methyltransferase; IPR019410_Lysine methyltransferase	0.163333	2.75	2.91	2.18	0.19	0.3	0	3.55	2.62	2.08	4.68	1.15	2.9	2.82	2.13	1.59
Am_Tr_001211	2026	XP_028202768.1_methyltransferase-like protein 22 isoform X2 [Glycine soja] XP_040865340.1 S-adenosylmethionine-dependent methyltransferase family protein isoform X1 [Glycine max]	AT1G79915.2_Putative methyltransferase family protein	.	0.05	0.0633333	0.03	0.0533333	0.15	0	0	0.19	0	0	0.09	0	0	0	0	0.16
Am_Tr_001212	1421	GAU11009.1_hypothetical protein TSUD_113020 [Trifolium subterraneum]	AT1G79915.1_Putative methyltransferase family protein	.	0.133333	0.183333	0.12	0.273333	0.27	0	0.13	0	0.55	0	0.36	0	0	0.82	0	0
Am_Tr_001213	1551	XP_027340407.1_methyltransferase-like protein 22 isoform X1 [Abrus precatorius]	AT1G79915.2_Putative methyltransferase family protein	.	0	0.603333	0.693333	0.556667	0	0	0	0.31	0.41	1.09	0.75	0.94	0.39	0.39	0.61	0.67
Am_Tr_001214	443	XP_027340407.1_methyltransferase-like protein 22 isoform X1 [Abrus precatorius]	AT1G79915.2_Putative methyltransferase family protein	.	0.143333	1.10333	0.25	0.203333	0	0.43	0	2.02	1.29	0	0.35	0.4	0	0.61	0	0
Am_Tr_001215	643	XP_027340407.1_methyltransferase-like protein 22 isoform X1 [Abrus precatorius]	AT1G79915.2_Putative methyltransferase family protein	.	0	0.963333	0.593333	0.12	0	0	0	0	0.99	1.9	0.46	0.35	0.97	0.04	0	0.32
Am_Tr_001216	641	XP_027340407.1_methyltransferase-like protein 22 isoform X1 [Abrus precatorius]	AT1G79915.2_Putative methyltransferase family protein	IPR019410_Lysine methyltransferase	0	0.32	0.253333	0.423333	0	0	0	0.26	0.5	0.2	0	0	0.76	0.28	0.99	0
Am_Tr_001217	1322	TKY74802.1_Transmembrane 9 superfamily member 8 [Spatholobus suberectus]	AT5G10840.1_Endomembrane protein 70 protein family, GeneName=EMP1	IPR004240_Nonaspanin (TM9SF)	0.0733333	0.19	0.11	0.0666667	0.22	0	0	0	0.38	0.19	0.08	0	0.25	0	0.2	0
Am_Tr_001218	855	XP_027330166.1_transmembrane 9 superfamily member 8 isoform X2 [Abrus precatorius]	AT5G10840.1_Endomembrane protein 70 protein family, GeneName=EMP1	IPR004240_Nonaspanin (TM9SF)	0.2	0.383333	0.113333	0.0966667	0	0	0.6	0	1.15	0	0	0	0.34	0	0	0.29
Am_Tr_001219	2516	XP_004501387.1_transmembrane 9 superfamily member 9 [Cicer arietinum]	AT5G10840.1_Endomembrane protein 70 protein family, GeneName=EMP1	IPR004240_Nonaspanin (TM9SF); IPR036259_MFS transporter superfamily	59.5833	61.2	44.2967	83.9433	31.01	91.44	56.3	58.9	66.71	57.99	29.17	47.34	56.38	71.85	86.63	93.35
Am_Tr_001220	2184	PNX92982.1_transmembrane 9 superfamily member 4-like protein [Trifolium pratense] PNY11771.1 transmembrane 9 superfamily member 4-like protein [Trifolium pratense] PNY11774.1 transmembrane 9 superfamily member 4-like protein [Trifolium pratense]	AT2G24170.2_Endomembrane protein 70 protein family	IPR004240_Nonaspanin (TM9SF)	0.233333	0.466667	0.226667	0.57	0.29	0.41	0	0.44	0.56	0.4	0.13	0.22	0.33	0.11	0.72	0.88
Am_Tr_001221	2009	KAG4392023.1_hypothetical protein GLYMA_04G060700v4 [Glycine max] KAH1110020.1 hypothetical protein GYH30_009091 [Glycine max]	AT5G25100.1_Endomembrane protein 70 protein family	IPR036259_MFS transporter superfamily; IPR004240_Nonaspanin (TM9SF)	2.26667	2.09667	2.66667	4.56333	1.14	1.99	3.67	3.14	1.97	1.18	5.44	1.78	0.78	9.34	2.62	1.73
Am_Tr_001222	2149	MCH81784.1_transmembrane 9 superfamily member 4-like [Trifolium medium]	AT5G10840.1_Endomembrane protein 70 protein family, GeneName=EMP1	IPR004240_Nonaspanin (TM9SF)	0.203333	0.52	4.93	0.9	0	0.61	0	0.24	0.5	0.82	13.91	0.22	0.66	2.23	0.23	0.24
Am_Tr_001223	2807	MCH81784.1_transmembrane 9 superfamily member 4-like [Trifolium medium]	AT5G10840.1_Endomembrane protein 70 protein family, GeneName=EMP1	IPR004240_Nonaspanin (TM9SF)	0.0866667	0.576667	0.26	0.6	0.26	0	0	0.5	0.57	0.66	0	0	0.78	1.03	0.51	0.26
Am_Tr_001224	2759	XP_004501387.1_transmembrane 9 superfamily member 9 [Cicer arietinum]	AT5G10840.1_Endomembrane protein 70 protein family, GeneName=EMP1	IPR004240_Nonaspanin (TM9SF); IPR036259_MFS transporter superfamily	1.16667	0.606667	0.696667	0.78	0	0.85	2.65	1.1	0.31	0.41	0	1.11	0.98	1.47	0.43	0.44
Am_Tr_001225	1676	XP_004501387.1_transmembrane 9 superfamily member 9 [Cicer arietinum]	AT5G10840.1_Endomembrane protein 70 protein family, GeneName=EMP1	IPR004240_Nonaspanin (TM9SF)	0.1	0.583333	0.106667	0.226667	0.12	0	0.18	0.98	0.38	0.39	0	0	0.32	0.34	0.18	0.16
Am_Tr_001226	2709	XP_003588860.1_transmembrane 9 superfamily member 8 [Medicago truncatula] AES59111.1 endomembrane protein 70 family protein [Medicago truncatula] RHN77015.1 putative nonaspanin (TM9SF), major facilitator superfamily domain-containing protein [Medicago truncatula]	AT5G10840.1_Endomembrane protein 70 protein family, GeneName=EMP1	IPR004240_Nonaspanin (TM9SF)	55.4833	59.6067	58.2267	77.5333	34.6	72.11	59.74	48.79	63.55	66.48	40.16	68	66.52	65.8	68.77	98.03
Am_Tr_001227	226	DAD32951.1_TPA_asm: hypothetical protein HUJ06_011802 [Nelumbo nucifera]	AT3G62150.2_P-glycoprotein 21, GeneName=ABCB21	.	1.15667	0	0	0	0	0	3.47	0	0	0	0	0	0	0	0	0
Am_Tr_001228	206	.	.	.	0	0	0	0	0	0	0	0	0	0	0	0	0	0	0	0
Am_Tr_001229	1471	PNY12361.1_alpha-L-fucosidase 2-like protein [Trifolium pratense]	AT4G34260.1_1,2-alpha-L-fucosidase, GeneName=FUC95A	IPR008928_Six-hairpin glycosidase superfamily	0	0.163333	0.256667	0	0	0	0	0.26	0	0.23	0	0.77	0	0	0	0
Am_Tr_001230	682	TKY50995.1_Alpha-L-fucosidase 2 [Spatholobus suberectus]	AT4G34260.1_1,2-alpha-L-fucosidase, GeneName=FUC95A	IPR008928_Six-hairpin glycosidase superfamily	0	0.956667	0.326667	0.113333	0	0	0	1.97	0.34	0.56	0.19	0.79	0	0	0	0.34
Am_Tr_001231	1721	XP_028219922.1_alpha-L-fucosidase 2-like isoform X2 [Glycine soja]	AT4G34260.1_1,2-alpha-L-fucosidase, GeneName=FUC95A	IPR008928_Six-hairpin glycosidase superfamily	0.343333	0.0833333	0.42	0.626667	0	0.75	0.28	0.25	0	0	0.44	0.55	0.27	0.97	0.51	0.4
Am_Tr_001232	1949	GAU15034.1_hypothetical protein TSUD_48300 [Trifolium subterraneum]	AT4G34260.1_1,2-alpha-L-fucosidase, GeneName=FUC95A	IPR008928_Six-hairpin glycosidase superfamily	0.613333	0.14	0.586667	0.803333	0	0.38	1.46	0.19	0.11	0.12	1.31	0	0.45	1.87	0.12	0.42
Am_Tr_001233	2241	RDX58928.1_Alpha-L-fucosidase 2, partial [Mucuna pruriens]	AT4G34260.1_1,2-alpha-L-fucosidase, GeneName=FUC95A	IPR008928_Six-hairpin glycosidase superfamily	0.0433333	0.05	0.0433333	0.613333	0	0	0.13	0	0	0.15	0	0	0.13	1.65	0	0.19
Am_Tr_001234	883	GAU15037.1_hypothetical protein TSUD_48330, partial [Trifolium subterraneum]	AT4G34260.1_1,2-alpha-L-fucosidase, GeneName=FUC95A	IPR008928_Six-hairpin glycosidase superfamily	0	2.48333	1.14333	0.183333	0	0	0	3.56	2.33	1.56	2.19	0.67	0.57	0	0.28	0.27
Am_Tr_001235	1902	RDX58928.1_Alpha-L-fucosidase 2, partial [Mucuna pruriens]	AT4G34260.1_1,2-alpha-L-fucosidase, GeneName=FUC95A	IPR008928_Six-hairpin glycosidase superfamily	5.32	3.93	11.76	12.8533	3.9	8.93	3.13	4.16	4.9	2.73	11.95	11.97	11.36	10.97	8.84	18.75
Am_Tr_001236	1075	AFK33985.1_unknown [Lotus japonicus]	AT2G39705.1_ROTUNDIFOLIA like 8, GeneName=RTFL8	.	24.7067	8.17	8.58667	15.1967	33.74	24.43	15.95	11.9	6.37	6.24	6.61	9.16	9.99	10.03	16.07	19.49
Am_Tr_001237	938	OIV95622.1_hypothetical protein TanjilG_23853 [Lupinus angustifolius]	AT2G39705.1_ROTUNDIFOLIA like 8, GeneName=RTFL8	IPR012552_DVL	0	0.81	0.896667	3.78667	0	0	0	0.39	0.88	1.16	0.33	1	1.36	0.66	2.58	8.12
Am_Tr_001238	1127	.	.	.	192.103	133.103	121.36	146.99	217.38	165.4	193.53	120.5	144.52	134.29	76.37	139.19	148.52	120.49	153.53	166.95
Am_Tr_001239	1719	.	.	.	10.0833	9.88333	14.6933	11.8467	18.64	4.62	6.99	11.78	10.55	7.32	23.72	10.86	9.5	19.55	6.88	9.11
Am_Tr_001240	1364	.	.	.	28.03	33.4833	33.4633	71.32	40.5	30.89	12.7	28.71	39.79	31.95	32.58	34.75	33.06	63.71	80.84	69.41
Am_Tr_001241	468	.	.	.	2.86667	2.39333	3.66667	2.18333	4.14	2.95	1.51	3.51	0.69	2.98	7.14	1.55	2.31	4.64	0	1.91
Am_Tr_001242	1667	GAU31020.1_hypothetical protein TSUD_214560 [Trifolium subterraneum]	.	.	0.163333	0.176667	0.28	0.236667	0.17	0.32	0	0.25	0.15	0.13	0.09	0.25	0.5	0.24	0.29	0.18
Am_Tr_001243	1907	.	.	.	1.07667	0.793333	0.99	0.38	1.62	0.71	0.9	1.91	0	0.47	1.7	0.38	0.89	0.43	0.47	0.24
Am_Tr_001244	1989	.	.	.	22.9767	17.7233	17.8	23.3467	26.51	19.76	22.66	17.15	18.31	17.71	14.48	21.74	17.18	19.5	25.39	25.15
Am_Tr_001245	1475	.	.	.	0.0366667	0.133333	0.09	0.0466667	0	0	0.11	0	0	0.4	0	0	0.27	0.14	0	0
Am_Tr_001246	6048	XP_027350956.1_protein NRT1/ PTR FAMILY 6.1 [Abrus precatorius]	AT5G13400.1_Major facilitator superfamily protein	IPR000109_Proton-dependent oligopeptide transporter family; IPR036259_MFS transporter superfamily	0	1.70667	0.126667	0	0	0	0	2.59	1.1	1.43	0	0.38	0	0	0	0
Am_Tr_001247	2191	KAE9621214.1_putative 7-hydroxymethyl chlorophyll a reductase [Lupinus albus]	AT1G04620.1_coenzyme F420 hydrogenase family / dehydrogenase, beta subunit family, GeneName=HCAR	IPR007525_Coenzyme F420 hydrogenase/dehydrogenase beta subunit, C-terminal; IPR011254_Prismane-like superfamily; IPR007516_Coenzyme F420 hydrogenase/dehydrogenase beta subunit, N-terminal	0.103333	60.2733	18.5633	19.41	0	0.31	0	63.43	52.49	64.9	12.56	20.39	22.74	17.12	18.15	22.96
Am_Tr_001248	6824	XP_027350956.1_protein NRT1/ PTR FAMILY 6.1 [Abrus precatorius]	AT5G13400.1_Major facilitator superfamily protein	IPR000109_Proton-dependent oligopeptide transporter family; IPR036259_MFS transporter superfamily	0.05	0.613333	0.463333	0.226667	0.15	0	0	1.18	0.13	0.53	0.3	0.24	0.85	0.21	0.14	0.33
Am_Tr_001249	1809	KAF1898749.1_hypothetical protein Lal_00000651 [Lupinus albus]	AT1G04620.1_coenzyme F420 hydrogenase family / dehydrogenase, beta subunit family, GeneName=HCAR	IPR007516_Coenzyme F420 hydrogenase/dehydrogenase beta subunit, N-terminal; IPR011254_Prismane-like superfamily	0.116667	0.33	0.27	0.37	0.35	0	0	0.22	0.09	0.68	0.07	0.67	0.07	0	1.11	0
Am_Tr_001250	5197	XP_027350956.1_protein NRT1/ PTR FAMILY 6.1 [Abrus precatorius]	AT5G13400.1_Major facilitator superfamily protein	IPR000109_Proton-dependent oligopeptide transporter family; IPR036259_MFS transporter superfamily	1.13	0.193333	0.22	0.703333	1.35	1.72	0.32	0.19	0.11	0.28	0.19	0.21	0.26	0.42	0.81	0.88
Am_Tr_001251	999	ACU18042.1_unknown [Glycine max]	AT1G04620.1_coenzyme F420 hydrogenase family / dehydrogenase, beta subunit family, GeneName=HCAR	.	0	4.94667	8.79667	2.70333	0	0	0	8.37	4.79	1.68	17.97	5.51	2.91	5.06	1.6	1.45
Am_Tr_001252	1099	XP_027189478.1_7-hydroxymethyl chlorophyll a reductase, chloroplastic isoform X4 [Cicer arietinum]	AT1G04620.1_coenzyme F420 hydrogenase family / dehydrogenase, beta subunit family, GeneName=HCAR	.	0.0733333	1.06667	0.95	0.803333	0	0.22	0	2.53	0.44	0.23	0.7	0.42	1.73	0.48	1.18	0.75
Am_Tr_001253	1789	XP_013467142.1_7-hydroxymethyl chlorophyll a reductase, chloroplastic [Medicago truncatula] AYG87489.1 7-hydroxymethyl chlorophyll a reductase [Medicago truncatula] KEH41178.1 coenzyme F420-reducing hydrogenase, beta subunit [Medicago truncatula] RHN78728.1 putative 7-hydroxymethyl chlorophyll a reductase [Medicago truncatula]	AT1G04620.1_coenzyme F420 hydrogenase family / dehydrogenase, beta subunit family, GeneName=HCAR	IPR007516_Coenzyme F420 hydrogenase/dehydrogenase beta subunit, N-terminal; IPR007525_Coenzyme F420 hydrogenase/dehydrogenase beta subunit, C-terminal; IPR011254_Prismane-like superfamily	0	3.35333	1.91	0.423333	0	0	0	6.59	2.9	0.57	0.59	3.44	1.7	0	1.27	0
Am_Tr_001254	1475	KYP73610.1_Uncharacterized protein all1601 family [Cajanus cajan]	AT1G04620.1_coenzyme F420 hydrogenase family / dehydrogenase, beta subunit family, GeneName=HCAR	.	0.0833333	2.88333	0.923333	0.16	0.03	0.22	0	2.65	3.03	2.97	1.28	1.49	0	0	0.48	0
Am_Tr_001255	1630	RZB42897.1_7-hydroxymethyl chlorophyll a reductase, chloroplastic [Glycine soja]	AT1G04620.1_coenzyme F420 hydrogenase family / dehydrogenase, beta subunit family, GeneName=HCAR	.	0	4.76333	0.81	1.71	0	0	0	7.45	4.1	2.74	0.52	0	1.91	1.53	1.18	2.42
Am_Tr_001256	579	PNX71993.1_7-hydroxymethyl chlorophyll a reductase chloroplastic-like, partial [Trifolium pratense]	AT1G04620.1_coenzyme F420 hydrogenase family / dehydrogenase, beta subunit family, GeneName=HCAR	.	0.286667	15.9	9.57333	7	0	0.86	0	11.49	16.23	19.98	8.34	10.31	10.07	4.9	5.43	10.67
Am_Tr_001257	788	XP_012570411.1_7-hydroxymethyl chlorophyll a reductase, chloroplastic isoform X3 [Cicer arietinum]	AT1G04620.1_coenzyme F420 hydrogenase family / dehydrogenase, beta subunit family, GeneName=HCAR	.	0	2.36667	0.66	1.40333	0	0	0	2.44	3.37	1.29	0	0.9	1.08	1.5	0.82	1.89
Am_Tr_001258	1831	XP_027189478.1_7-hydroxymethyl chlorophyll a reductase, chloroplastic isoform X4 [Cicer arietinum]	AT1G04620.1_coenzyme F420 hydrogenase family / dehydrogenase, beta subunit family, GeneName=HCAR	.	0	0.236667	0	0.0866667	0	0	0	0.31	0	0.4	0	0	0	0	0.26	0
Am_Tr_001259	6363	XP_027350956.1_protein NRT1/ PTR FAMILY 6.1 [Abrus precatorius]	AT5G13400.1_Major facilitator superfamily protein	IPR000109_Proton-dependent oligopeptide transporter family; IPR036259_MFS transporter superfamily	0.0466667	0.82	0.12	0.0866667	0	0.14	0	1.11	0.33	1.02	0	0	0.36	0	0.26	0
Am_Tr_001260	6283	XP_027350956.1_protein NRT1/ PTR FAMILY 6.1 [Abrus precatorius]	AT5G13400.1_Major facilitator superfamily protein	IPR000109_Proton-dependent oligopeptide transporter family; IPR036259_MFS transporter superfamily	0.0133333	1.52667	0.216667	0.28	0	0	0.04	1.27	2.32	0.99	0	0.43	0.22	0.28	0.29	0.27
Am_Tr_001261	509	MCH92751.1_7-hydroxymethyl chlorophyll a reductase chloroplastic-like [Trifolium medium]	AT1G04620.1_coenzyme F420 hydrogenase family / dehydrogenase, beta subunit family, GeneName=HCAR	.	0.14	7.72667	2.91	2.31333	0	0.42	0	7.03	6.13	10.02	1	2.08	5.65	1.82	1.78	3.34
Am_Tr_001262	893	RVW96738.1_7-hydroxymethyl chlorophyll a reductase, chloroplastic [Vitis vinifera]	AT1G04620.1_coenzyme F420 hydrogenase family / dehydrogenase, beta subunit family, GeneName=HCAR	.	0.376667	7.92667	5.63333	2.54333	0.26	0.64	0.23	7.49	6.68	9.61	6.85	5.69	4.36	2.67	2.92	2.04
Am_Tr_001263	5292	XP_027350956.1_protein NRT1/ PTR FAMILY 6.1 [Abrus precatorius]	AT5G13400.1_Major facilitator superfamily protein	IPR000109_Proton-dependent oligopeptide transporter family; IPR036259_MFS transporter superfamily	0.06	1.47667	0	0.0766667	0.05	0.13	0	1.05	3.38	0	0	0	0	0	0	0.23
Am_Tr_001264	4904	XP_027350956.1_protein NRT1/ PTR FAMILY 6.1 [Abrus precatorius]	AT5G13400.1_Major facilitator superfamily protein	IPR000109_Proton-dependent oligopeptide transporter family; IPR036259_MFS transporter superfamily	151.353	43.4867	81.1	105.497	126.89	235.19	91.98	30.62	49.1	50.74	56.47	91.74	95.09	95.54	110.56	110.39
Am_Tr_001265	2432	XP_020991053.1_7-hydroxymethyl chlorophyll a reductase, chloroplastic isoform X5 [Arachis duranensis] XP_029147856.1 7-hydroxymethyl chlorophyll a reductase, chloroplastic isoform X5 [Arachis hypogaea]	AT1G04620.1_coenzyme F420 hydrogenase family / dehydrogenase, beta subunit family, GeneName=HCAR	IPR007516_Coenzyme F420 hydrogenase/dehydrogenase beta subunit, N-terminal; IPR011254_Prismane-like superfamily	0.0366667	4.86	3.58667	2.12	0	0.05	0.06	8.3	2.72	3.56	3.65	2.86	4.25	4.04	0.4	1.92
Am_Tr_001266	2211	KAF1898749.1_hypothetical protein Lal_00000651 [Lupinus albus]	AT1G04620.1_coenzyme F420 hydrogenase family / dehydrogenase, beta subunit family, GeneName=HCAR	IPR007525_Coenzyme F420 hydrogenase/dehydrogenase beta subunit, C-terminal	0.643333	17.63	8.14667	5.78333	0.23	1.61	0.09	15.95	17.33	19.61	8.23	7.74	8.47	4.36	7.76	5.23
Am_Tr_001267	5447	XP_027350956.1_protein NRT1/ PTR FAMILY 6.1 [Abrus precatorius]	AT5G13400.1_Major facilitator superfamily protein	IPR000109_Proton-dependent oligopeptide transporter family; IPR036259_MFS transporter superfamily	0	1.35667	0.146667	0.853333	0	0	0	0.18	0.38	3.51	0	0	0.44	1.47	0	1.09
Am_Tr_001268	1550	RVW96738.1_7-hydroxymethyl chlorophyll a reductase, chloroplastic [Vitis vinifera]	AT1G04620.1_coenzyme F420 hydrogenase family / dehydrogenase, beta subunit family, GeneName=HCAR	.	0.0633333	3.75333	0.166667	0	0.19	0	0	2.99	4.11	4.16	0	0.5	0	0	0	0
Am_Tr_001269	2466	XP_013467142.1_7-hydroxymethyl chlorophyll a reductase, chloroplastic [Medicago truncatula] AYG87489.1 7-hydroxymethyl chlorophyll a reductase [Medicago truncatula] KEH41178.1 coenzyme F420-reducing hydrogenase, beta subunit [Medicago truncatula] RHN78728.1 putative 7-hydroxymethyl chlorophyll a reductase [Medicago truncatula]	AT1G04620.1_coenzyme F420 hydrogenase family / dehydrogenase, beta subunit family, GeneName=HCAR	IPR007516_Coenzyme F420 hydrogenase/dehydrogenase beta subunit, N-terminal; IPR011254_Prismane-like superfamily	0.0133333	0	1.09667	0.483333	0	0.01	0.03	0	0	0	0.76	2.53	0	0.01	0.66	0.78
Am_Tr_001270	2354	XP_045823542.1_probable WRKY transcription factor 9 [Trifolium pratense]	AT1G66950.1_pleiotropic drug resistance 11, GeneName=ABCG39	.	0.533333	0.496667	0.63	0.746667	1.01	0.59	0	0.87	0.62	0	1.22	0.39	0.28	1.1	1.14	0
Am_Tr_001271	2313	XP_045823542.1_probable WRKY transcription factor 9 [Trifolium pratense]	AT1G66950.1_pleiotropic drug resistance 11, GeneName=ABCG39	.	0.11	1.63333	1.75	0.986667	0.26	0	0.07	4.11	0.67	0.12	3.14	1.5	0.61	2.58	0.24	0.14
Am_Tr_001272	4903	XP_004486707.1_pleiotropic drug resistance protein 1-like [Cicer arietinum]	AT1G15520.1_pleiotropic drug resistance 12, GeneName=ABCG40	IPR003593_AAA+ ATPase domain; IPR013581_Plant PDR ABC transporter associated; IPR043926_ABC transporter family G domain; IPR029481_ABC-transporter, N-terminal domain; IPR003439_ABC transporter-like, ATP-binding domain; IPR027417_P-loop containing nucleoside triphosphate hydrolase; IPR013525_ABC-2 type transporter	1.56667	5.84667	4.21667	1.92333	1.9	2.41	0.39	4.74	5.44	7.36	2.32	2.84	7.49	2.68	1.68	1.41
Am_Tr_001273	4810	XP_004486707.1_pleiotropic drug resistance protein 1-like [Cicer arietinum]	AT1G15520.1_pleiotropic drug resistance 12, GeneName=ABCG40	IPR003593_AAA+ ATPase domain; IPR027417_P-loop containing nucleoside triphosphate hydrolase; IPR003439_ABC transporter-like, ATP-binding domain; IPR013581_Plant PDR ABC transporter associated; IPR013525_ABC-2 type transporter; IPR043926_ABC transporter family G domain; IPR029481_ABC-transporter, N-terminal domain	97.24	214.487	93.19	101.64	32.2	138.84	120.68	156.08	214.23	273.15	38.57	108.87	132.13	90.16	104.02	110.74
Am_Tr_001274	734	PNX77073.1_ABC transporter G family member 36-like protein, partial [Trifolium pratense]	AT1G59870.1_ABC-2 and Plant PDR ABC-type transporter family protein, GeneName=PEN3	IPR043926_ABC transporter family G domain; IPR027417_P-loop containing nucleoside triphosphate hydrolase	11.8433	12.93	5.23333	8.74667	25.43	7.63	2.47	15.23	12.88	10.68	2.06	7.39	6.25	6.06	12.44	7.74
Am_Tr_001275	5324	XP_004510308.1_ABC transporter G family member 36-like [Cicer arietinum]	AT1G59870.1_ABC-2 and Plant PDR ABC-type transporter family protein, GeneName=PEN3	IPR013525_ABC-2 type transporter; IPR013581_Plant PDR ABC transporter associated; IPR029481_ABC-transporter, N-terminal domain; IPR027417_P-loop containing nucleoside triphosphate hydrolase; IPR003439_ABC transporter-like, ATP-binding domain; IPR043926_ABC transporter family G domain; IPR003593_AAA+ ATPase domain	1.64667	2.25667	2.08	2.83333	1.94	1.55	1.45	3.47	1.8	1.5	0.43	3.17	2.64	5.29	1.46	1.75
Am_Tr_001276	5212	XP_004510308.1_ABC transporter G family member 36-like [Cicer arietinum]	AT1G59870.1_ABC-2 and Plant PDR ABC-type transporter family protein, GeneName=PEN3	IPR027417_P-loop containing nucleoside triphosphate hydrolase; IPR029481_ABC-transporter, N-terminal domain; IPR043926_ABC transporter family G domain; IPR013581_Plant PDR ABC transporter associated; IPR003593_AAA+ ATPase domain; IPR013525_ABC-2 type transporter; IPR003439_ABC transporter-like, ATP-binding domain	215.473	321.92	95.8	236.52	213.19	271.77	161.46	272.42	356.27	337.07	31.3	128.31	127.79	202.86	234.45	272.25
Am_Tr_001277	1161	QYF11716.1_ABCG8, partial [Glycyrrhiza glabra]	AT3G16340.2_pleiotropic drug resistance 1, GeneName=ABCG29	IPR013525_ABC-2 type transporter; IPR027417_P-loop containing nucleoside triphosphate hydrolase; IPR003439_ABC transporter-like, ATP-binding domain; IPR013581_Plant PDR ABC transporter associated	0	0.38	0.633333	0.676667	0	0	0	1.14	0	0	1.71	0.19	0	2.03	0	0
Am_Tr_001278	1245	QYF11716.1_ABCG8, partial [Glycyrrhiza glabra]	AT3G16340.2_pleiotropic drug resistance 1, GeneName=ABCG29	IPR027417_P-loop containing nucleoside triphosphate hydrolase; IPR003439_ABC transporter-like, ATP-binding domain; IPR013525_ABC-2 type transporter; IPR013581_Plant PDR ABC transporter associated	0.25	0.47	0.15	0.523333	0.75	0	0	1.41	0	0	0.45	0	0	1.57	0	0
Am_Tr_001279	760	XP_045821476.1_DNA mismatch repair protein MLH1 isoform X2 [Trifolium pratense]	AT4G09140.1_MUTL-homologue 1, GeneName=MLH1	IPR036890_Histidine kinase/HSP90-like ATPase superfamily	0.0866667	2.25667	0.506667	1.28333	0.1	0	0.16	0.87	2.96	2.94	0	1.32	0.2	0	0.66	3.19
Am_Tr_001280	2787	XP_004499581.1_DNA mismatch repair protein MLH1 [Cicer arietinum]	AT4G09140.1_MUTL-homologue 1, GeneName=MLH1	IPR013507_DNA mismatch repair protein, S5 domain 2-like; IPR020568_Ribosomal protein S5 domain 2-type fold; IPR002099_DNA mismatch repair protein family, N-terminal; IPR032189_DNA mismatch repair protein Mlh1, C-terminal; IPR036890_Histidine kinase/	3.34667	9.45	4.03333	9.26667	2.73	4.53	2.78	10.51	8.25	9.59	2.89	4.29	4.92	7.46	9.01	11.33
Am_Tr_001281	1062	PNX70119.1_pleiotropic drug resistance protein 1-like, partial [Trifolium pratense] PNX70726.1 pleiotropic drug resistance protein 1-like, partial [Trifolium pratense]	AT1G15520.2_pleiotropic drug resistance 12, GeneName=ABCG40	.	0	0.04	0	0.0766667	0	0	0	0	0.12	0	0	0	0	0	0.23	0
Am_Tr_001282	1009	XP_045814156.1_pleiotropic drug resistance protein 1-like isoform X2 [Trifolium pratense] XP_045814164.1 pleiotropic drug resistance protein 1-like isoform X2 [Trifolium pratense]	AT1G15520.2_pleiotropic drug resistance 12, GeneName=ABCG40	.	0.183333	0.633333	0	0	0	0.55	0	0	1.39	0.51	0	0	0	0	0	0
Am_Tr_001283	1038	PNX66681.1_pleiotropic drug resistance protein, partial [Trifolium pratense]	AT1G15520.2_pleiotropic drug resistance 12, GeneName=ABCG40	.	0.686667	3.53667	1.96667	2.72333	1.06	1	0	2.74	3.94	3.93	1.95	2.71	1.24	1.28	2.65	4.24
Am_Tr_001284	237	PNX70747.1_pleiotropic drug resistance protein 1-like, partial [Trifolium pratense]	AT1G15520.2_pleiotropic drug resistance 12, GeneName=ABCG40	.	0	0	1.55333	0.85	0	0	0	0	0	0	0	4.66	0	2.55	0	0
Am_Tr_001285	1068	PNX66681.1_pleiotropic drug resistance protein, partial [Trifolium pratense]	AT1G15520.2_pleiotropic drug resistance 12, GeneName=ABCG40	.	0.18	0.06	0	0.393333	0.01	0.53	0	0.18	0	0	0	0	0	0	1.18	0
Am_Tr_001286	1154	XP_045814156.1_pleiotropic drug resistance protein 1-like isoform X2 [Trifolium pratense] XP_045814164.1 pleiotropic drug resistance protein 1-like isoform X2 [Trifolium pratense]	AT1G15520.2_pleiotropic drug resistance 12, GeneName=ABCG40	.	0.39	0.113333	0.18	2.06333	0	1.17	0	0.34	0	0	0	0.12	0.42	1.98	2.41	1.8
Am_Tr_001287	1153	PNX55890.1_pleiotropic drug resistance protein 1-like, partial [Trifolium pratense]	AT1G15520.2_pleiotropic drug resistance 12, GeneName=ABCG40	.	0	0.296667	0.17	0.243333	0	0	0	0.19	0.51	0.19	0	0.2	0.31	0	0.52	0.21
Am_Tr_001288	893	PNX55890.1_pleiotropic drug resistance protein 1-like, partial [Trifolium pratense]	AT1G15520.2_pleiotropic drug resistance 12, GeneName=ABCG40	.	0	1.75667	0.126667	1.81333	0	0	0	1.07	0.91	3.29	0	0	0.38	2.51	1.37	1.56
Am_Tr_001289	208	PNX70119.1_pleiotropic drug resistance protein 1-like, partial [Trifolium pratense] PNX70726.1 pleiotropic drug resistance protein 1-like, partial [Trifolium pratense]	AT4G15233.4_ABC-2 and Plant PDR ABC-type transporter family protein, GeneName=ABCG42	.	0	0	0	0	0	0	0	0	0	0	0	0	0	0	0	0
Am_Tr_001290	1184	XP_045814156.1_pleiotropic drug resistance protein 1-like isoform X2 [Trifolium pratense] XP_045814164.1 pleiotropic drug resistance protein 1-like isoform X2 [Trifolium pratense]	AT1G15520.2_pleiotropic drug resistance 12, GeneName=ABCG40	.	0.456667	0.63	0.1	0	0.49	0	0.88	0	0.69	1.2	0	0.3	0	0	0	0
Am_Tr_001291	923	PNX55890.1_pleiotropic drug resistance protein 1-like, partial [Trifolium pratense]	AT1G15520.2_pleiotropic drug resistance 12, GeneName=ABCG40	.	0	0	0	0.68	0	0	0	0	0	0	0	0	0	1.07	0.41	0.56
Am_Tr_001292	239	XP_030526429.1_pleiotropic drug resistance protein 1-like isoform X3 [Rhodamnia argentea]	AT1G15520.2_pleiotropic drug resistance 12, GeneName=ABCG40	.	0	0	0	0	0	0	0	0	0	0	0	0	0	0	0	0
Am_Tr_001293	470	.	.	.	2.98333	3.86667	2.6	2.02	5.16	3.79	0	4.27	4.62	2.71	2.43	2.26	3.11	3.28	2.03	0.75
Am_Tr_001294	301	XP_045810889.1_uncharacterized protein LOC123905327 [Trifolium pratense]	.	.	2.03667	0	1.56667	0.346667	4.66	1.45	0	0	0	0	4.7	0	0	0	0	1.04
Am_Tr_001295	203	.	AT1G69410.1_eukaryotic elongation factor 5A-3, GeneName=ELF5A-3	.	0	5.00667	0	4.01333	0	0	0	6.55	8.47	0	0	0	0	0	0	12.04
Am_Tr_001296	311	.	.	.	0	2.91	1.03667	0.596667	0	0	0	3.3	2.84	2.59	2.07	1.04	0	1.79	0	0
Am_Tr_001297	226	XP_045810889.1_uncharacterized protein LOC123905327 [Trifolium pratense]	AT2G19480.3_nucleosome assembly protein 1;2, GeneName=NAP1;2	.	2.39333	0	0	0	7.18	0	0	0	0	0	0	0	0	0	0	0
Am_Tr_001298	484	.	.	.	4.28667	1.70333	3.47667	2.88333	8.49	4.37	0	2.93	2.18	0	6.87	3.56	0	4.39	4.26	0
Am_Tr_001299	305	.	.	.	1.42333	2.52	1.07667	0	4.27	0	0	0	6.14	1.42	0	0	3.23	0	0	0
Am_Tr_001300	311	.	.	.	2.89667	1.96333	0.346667	0.316667	6.06	0	2.63	3.3	0	2.59	1.04	0	0	0	0	0.95
Am_Tr_001301	622	KAH1203473.1_ABC transporter G family member 35 [Glycine max]	AT1G15520.2_pleiotropic drug resistance 12, GeneName=ABCG40	.	0.0366667	0.663333	0.466667	2.93	0.05	0.06	0	0	0	1.99	0	0.9	0.5	1.36	5.25	2.18
Am_Tr_001302	2848	XP_020240148.1_ABC transporter G family member 39 isoform X1 [Cajanus cajan]	AT1G15520.1_pleiotropic drug resistance 12, GeneName=ABCG40	IPR003593_AAA+ ATPase domain; IPR027417_P-loop containing nucleoside triphosphate hydrolase; IPR003439_ABC transporter-like, ATP-binding domain; IPR013581_Plant PDR ABC transporter associated; IPR043926_ABC transporter family G domain; IPR029481_ABC-transporter, N-terminal domain; IPR013525_ABC-2 type transporter	0.33	1.17333	0.25	6.43	0.18	0.61	0.2	0.25	1.9	1.37	0.21	0	0.54	3.26	8.34	7.69
Am_Tr_001303	2928	XP_004498643.1_pleiotropic drug resistance protein 1-like [Cicer arietinum] XP_012570689.1 pleiotropic drug resistance protein 1-like [Cicer arietinum]	AT1G15520.2_pleiotropic drug resistance 12, GeneName=ABCG40	IPR029481_ABC-transporter, N-terminal domain; IPR003593_AAA+ ATPase domain; IPR003439_ABC transporter-like, ATP-binding domain; IPR027417_P-loop containing nucleoside triphosphate hydrolase; IPR043926_ABC transporter family G domain; IPR013525_ABC-2 type transporter	0	0.533333	0.21	2.17333	0	0	0	0	1.28	0.32	0	0.63	0	0.48	3.65	2.39
Am_Tr_001304	1068	XP_004495102.1_chromatin modification-related protein MEAF6-like [Cicer arietinum]	AT4G14385.1_histone acetyltransferase subunit NuA4-domain protein	IPR015418_Chromatin modification-related protein Eaf6	9.76333	16.7	10.9533	14.8167	13.49	10.11	5.69	16.14	17.39	16.57	9.6	11.05	12.21	17.4	15.69	11.36
Am_Tr_001305	1490	XP_004495102.1_chromatin modification-related protein MEAF6-like [Cicer arietinum]	AT4G14385.4_histone acetyltransferase subunit NuA4-domain protein	.	0.15	1.02	0.23	0.21	0	0.45	0	0.67	2.01	0.38	0	0.69	0	0.2	0.43	0
Am_Tr_001306	2612	XP_004492714.1_exosome complex exonuclease RRP46 homolog isoform X1 [Cicer arietinum] XP_004492715.1 exosome complex exonuclease RRP46 homolog isoform X1 [Cicer arietinum]	AT3G46210.5_Ribosomal protein S5 domain 2-like superfamily protein	IPR001247_Exoribonuclease, phosphorolytic domain 1; IPR020568_Ribosomal protein S5 domain 2-type fold	0.936667	3.32667	1.84333	1.57667	0.63	0.98	1.2	1.95	4.8	3.23	1.56	1.99	1.98	0.85	2.49	1.39
Am_Tr_001307	2993	XP_004492714.1_exosome complex exonuclease RRP46 homolog isoform X1 [Cicer arietinum] XP_004492715.1 exosome complex exonuclease RRP46 homolog isoform X1 [Cicer arietinum]	AT3G46210.5_Ribosomal protein S5 domain 2-like superfamily protein	IPR001247_Exoribonuclease, phosphorolytic domain 1; IPR020568_Ribosomal protein S5 domain 2-type fold	0	0.0366667	0.0233333	0.246667	0	0	0	0.1	0	0.01	0.07	0	0	0	0	0.74
Am_Tr_001308	670	.	.	.	3.49	5.51667	5.57	6.90333	3.73	2.03	4.71	5.99	5.86	4.7	4.51	5.6	6.6	6.95	7.74	6.02
Am_Tr_001309	2567	XP_004492714.1_exosome complex exonuclease RRP46 homolog isoform X1 [Cicer arietinum] XP_004492715.1 exosome complex exonuclease RRP46 homolog isoform X1 [Cicer arietinum]	AT3G46210.5_Ribosomal protein S5 domain 2-like superfamily protein	IPR001247_Exoribonuclease, phosphorolytic domain 1; IPR036345_Exoribonuclease, PH domain 2 superfamily; IPR020568_Ribosomal protein S5 domain 2-type fold	0.0766667	1.11667	0.303333	0.203333	0	0.23	0	0.73	1.34	1.28	0.91	0	0	0	0	0.61
Am_Tr_001310	1210	.	.	.	2.21	1.31667	1.52333	1.15667	2.06	2.52	2.05	0.87	1.93	1.15	1.51	1.6	1.46	1.92	1.37	0.18
Am_Tr_001311	1319	XP_004495102.1_chromatin modification-related protein MEAF6-like [Cicer arietinum]	AT4G14385.4_histone acetyltransferase subunit NuA4-domain protein	.	0.4	1.66667	1.29667	1.49333	0.43	0.58	0.19	2.21	0.64	2.15	2.34	0.57	0.98	1.04	0.58	2.86
Am_Tr_001312	1653	XP_004495102.1_chromatin modification-related protein MEAF6-like [Cicer arietinum]	AT4G14385.4_histone acetyltransferase subunit NuA4-domain protein	.	1.64667	2.06	0.776667	1.79	0.23	1.75	2.96	1.46	1.86	2.86	0.45	0.97	0.91	1.03	1.88	2.46
Am_Tr_001313	2186	XP_004492714.1_exosome complex exonuclease RRP46 homolog isoform X1 [Cicer arietinum] XP_004492715.1 exosome complex exonuclease RRP46 homolog isoform X1 [Cicer arietinum]	AT3G46210.5_Ribosomal protein S5 domain 2-like superfamily protein	IPR001247_Exoribonuclease, phosphorolytic domain 1; IPR036345_Exoribonuclease, PH domain 2 superfamily; IPR020568_Ribosomal protein S5 domain 2-type fold	10.06	15	13.0033	17.8733	11.84	12.07	6.27	12.79	16.02	16.19	12.86	12.77	13.38	17.03	20.06	16.53
Am_Tr_001314	520	.	.	.	0.926667	2.33333	1.99333	2.32333	1.28	0.97	0.53	2.15	2.46	2.39	0.53	2.83	2.62	0.63	2.57	3.77
Am_Tr_001315	884	XP_004495102.1_chromatin modification-related protein MEAF6-like [Cicer arietinum]	AT4G14385.1_histone acetyltransferase subunit NuA4-domain protein	.	1.84333	6.55667	5.81667	3.28667	3.89	0.99	0.65	6.1	4.07	9.5	6.7	5.17	5.58	2.61	4.59	2.66
Am_Tr_001316	1700	KAF1860438.1_hypothetical protein Lal_00037782 [Lupinus albus]	AT4G14385.5_histone acetyltransferase subunit NuA4-domain protein	.	0.15	0.00333333	0.393333	0.54	0.45	0	0	0	0	0.01	0.01	0.65	0.52	0.45	1.17	0
Am_Tr_001317	2693	XP_024639895.1_ran guanine nucleotide release factor isoform X2 [Medicago truncatula] AES96655.2 Ran guanine nucleotide release factor-like protein [Medicago truncatula] RHN55330.1 putative ran-interacting Mog1 protein [Medicago truncatula]	AT1G69680.1_ran guanine nucleotide release factor, putative (Mog1/PsbP/DUF1795-like photosystem II reaction center PsbP family protein)	IPR016123_Mog1/PsbP, alpha/beta/alpha sandwich; IPR007681_Ran-interacting Mog1 protein	0.563333	1.40333	0.516667	0.753333	0	1.3	0.39	1.17	1.34	1.7	0	0.31	1.24	1.24	0.3	0.72
Am_Tr_001318	1498	XP_039690171.1_ran guanine nucleotide release factor isoform X1 [Medicago truncatula]	AT1G69680.1_ran guanine nucleotide release factor, putative (Mog1/PsbP/DUF1795-like photosystem II reaction center PsbP family protein)	IPR007681_Ran-interacting Mog1 protein; IPR016123_Mog1/PsbP, alpha/beta/alpha sandwich	21.9567	9.02	11.4333	11.1233	14.84	28.39	22.64	7.31	9.26	10.49	11.57	12.32	10.41	12.18	10.24	10.95
Am_Tr_001319	2608	XP_024639895.1_ran guanine nucleotide release factor isoform X2 [Medicago truncatula] AES96655.2 Ran guanine nucleotide release factor-like protein [Medicago truncatula] RHN55330.1 putative ran-interacting Mog1 protein [Medicago truncatula]	AT1G69680.1_ran guanine nucleotide release factor, putative (Mog1/PsbP/DUF1795-like photosystem II reaction center PsbP family protein)	IPR007681_Ran-interacting Mog1 protein; IPR016123_Mog1/PsbP, alpha/beta/alpha sandwich	2.32	3.16	1.79333	2.35333	0.95	1.92	4.09	2.84	2.94	3.7	1.77	2.31	1.3	1.95	2.44	2.67
Am_Tr_001320	1089	XP_004490033.1_ran guanine nucleotide release factor [Cicer arietinum] XP_004490035.1 ran guanine nucleotide release factor [Cicer arietinum]	AT1G69680.1_ran guanine nucleotide release factor, putative (Mog1/PsbP/DUF1795-like photosystem II reaction center PsbP family protein)	IPR007681_Ran-interacting Mog1 protein; IPR016123_Mog1/PsbP, alpha/beta/alpha sandwich	16.5567	8.29	10.4167	13.5267	18.65	15.02	16	9.05	8.54	7.28	11.59	10.02	9.64	12.08	13.33	15.17
Am_Tr_001321	311	.	.	.	0.396667	0	0	0	0	0	1.19	0	0	0	0	0	0	0	0	0
Am_Tr_001322	1455	KYP37954.1_hypothetical protein KK1_040815 [Cajanus cajan]	AT4G23160.3_cysteine-rich RECEPTOR-like kinase, GeneName=CRK8	.	0.886667	3.90333	7.51667	2.20667	0.31	1.56	0.79	3.67	3.64	4.4	3.39	5.77	13.39	3.17	1.66	1.79
Am_Tr_001323	1356	RZB87138.1_Pectin acetylesterase 2 isoform B [Glycine soja]	AT4G23160.3_cysteine-rich RECEPTOR-like kinase, GeneName=CRK8	.	0.0766667	0.11	0.443333	0	0	0	0.23	0.33	0	0	0.87	0	0.46	0	0	0
Am_Tr_001324	375	RDX97948.1_Copia protein, partial [Mucuna pruriens]	AT4G23160.3_cysteine-rich RECEPTOR-like kinase, GeneName=CRK8	.	2.49	0.346667	0.54	0.196667	1.23	0	6.24	0	0	1.04	0	0.57	1.05	0	0	0.59
Am_Tr_001325	1119	KYP60096.1_Retrovirus-related Pol polyprotein from transposon TNT 1-94 [Cajanus cajan]	AT4G23160.3_cysteine-rich RECEPTOR-like kinase, GeneName=CRK8	IPR013103_Reverse transcriptase, RNA-dependent DNA polymerase; IPR043502_DNA/RNA polymerase superfamily	1.23	3.34	3	2.17	0.32	1.91	1.46	2.37	3.38	4.27	0.95	2.44	5.61	2.54	1.95	2.02
Am_Tr_001326	7254	KHN21230.1_Retrovirus-related Pol polyprotein from transposon TNT 1-94, partial [Glycine soja]	AT4G23160.3_cysteine-rich RECEPTOR-like kinase, GeneName=CRK8	IPR013103_Reverse transcriptase, RNA-dependent DNA polymerase; IPR012337_Ribonuclease H-like superfamily; IPR043502_DNA/RNA polymerase superfamily	1.16	3.35333	2.29667	1.56	1.17	1.11	1.2	3.06	3.94	3.06	1.3	3.17	2.42	1.55	1.55	1.58
Am_Tr_001327	564	PNY12086.1_NBS-LRR resistance protein [Trifolium pratense]	AT3G14470.1_NB-ARC domain-containing disease resistance protein	.	0.436667	0.99	0.763333	2.06	0.94	0	0.37	0.39	0.46	2.12	1.18	0	1.11	1.13	1.78	3.27
Am_Tr_001328	2504	XP_027190826.1_LOW QUALITY PROTEIN: putative disease resistance RPP13-like protein 1 [Cicer arietinum]	AT3G14470.1_NB-ARC domain-containing disease resistance protein	.	2.74333	3.58333	1.84667	3.39333	2.58	1.96	3.69	2.11	5.08	3.56	1.95	2.27	1.32	4.17	2.68	3.33
Am_Tr_001329	2564	XP_027190826.1_LOW QUALITY PROTEIN: putative disease resistance RPP13-like protein 1 [Cicer arietinum]	.	.	2.74333	2.33	0.88	3.2	3.52	1.71	3	1.82	3.37	1.8	0.11	1.39	1.14	2.02	4.94	2.64
Am_Tr_001330	2655	XP_027190826.1_LOW QUALITY PROTEIN: putative disease resistance RPP13-like protein 1 [Cicer arietinum]	.	.	0	0.563333	0.756667	1.09	0	0	0	1.06	0	0.63	0.48	1.19	0.6	1.27	1.32	0.68
Am_Tr_001331	2299	XP_027190826.1_LOW QUALITY PROTEIN: putative disease resistance RPP13-like protein 1 [Cicer arietinum]	AT3G14470.1_NB-ARC domain-containing disease resistance protein	.	0.343333	0.616667	0.306667	0.606667	1.03	0	0	1.36	0.17	0.32	0.08	0.35	0.49	0.83	0.46	0.53
Am_Tr_001332	2740	XP_027190826.1_LOW QUALITY PROTEIN: putative disease resistance RPP13-like protein 1 [Cicer arietinum]	AT3G14470.1_NB-ARC domain-containing disease resistance protein	.	0.476667	0.12	0.24	0.123333	0	1.14	0.29	0.01	0.35	0	0	0.47	0.25	0.28	0	0.09
Am_Tr_001333	641	XP_027190826.1_LOW QUALITY PROTEIN: putative disease resistance RPP13-like protein 1 [Cicer arietinum]	.	.	6.72333	7.84	5.48	8.66667	8.24	5.04	6.89	7.45	10.49	5.58	5.07	5.36	6.01	6.29	7.54	12.17
Am_Tr_001334	469	XP_027190826.1_LOW QUALITY PROTEIN: putative disease resistance RPP13-like protein 1 [Cicer arietinum]	.	.	0	0.14	0.346667	0	0	0	0	0	0	0.42	0	1.04	0	0	0	0
Am_Tr_001335	1044	XP_027190826.1_LOW QUALITY PROTEIN: putative disease resistance RPP13-like protein 1 [Cicer arietinum]	.	.	0.14	0.0633333	0.38	0.253333	0	0.42	0	0	0	0.19	0	1.14	0	0	0.76	0
Am_Tr_001336	996	XP_027190826.1_LOW QUALITY PROTEIN: putative disease resistance RPP13-like protein 1 [Cicer arietinum]	.	.	0.62	1.49667	0.31	1.48	0.62	0.54	0.7	0.72	2.43	1.34	0.2	0.52	0.21	1.23	1.85	1.36
Am_Tr_001337	209	XP_027190826.1_LOW QUALITY PROTEIN: putative disease resistance RPP13-like protein 1 [Cicer arietinum]	AT3G14460.1_LRR and NB-ARC domains-containing disease resistance protein	.	0	0	0	0	0	0	0	0	0	0	0	0	0	0	0	0
Am_Tr_001338	3415	XP_012571685.1_transcription initiation factor TFIID subunit 5 isoform X1 [Cicer arietinum]	AT5G25150.2_TBP-associated factor 5, GeneName=TAF5	IPR007582_TFIID subunit TAF5, NTD2 domain; IPR037264_TFIID subunit TAF5, NTD2 domain superfamily	0.226667	0.856667	0.22	0.313333	0	0.68	0	0.72	0.25	1.6	0.12	0.38	0.16	0.54	0.4	0
Am_Tr_001339	3517	XP_012571685.1_transcription initiation factor TFIID subunit 5 isoform X1 [Cicer arietinum]	AT5G25150.2_TBP-associated factor 5, GeneName=TAF5	IPR007582_TFIID subunit TAF5, NTD2 domain; IPR037264_TFIID subunit TAF5, NTD2 domain superfamily	0	1.42333	1.26667	2.10333	0	0	0	0.76	2.32	1.19	0	1.94	1.86	1.5	0.83	3.98
Am_Tr_001340	3060	RDY14040.1_Transcription initiation factor TFIID subunit 5, partial [Mucuna pruriens]	AT5G25150.2_TBP-associated factor 5, GeneName=TAF5	IPR036322_WD40-repeat-containing domain superfamily; IPR001680_WD40 repeat; IPR020472_G-protein beta WD-40 repeat	0.0833333	0.506667	0	0.426667	0	0	0.25	0.19	0.45	0.88	0	0	0	0.34	0.93	0.01
Am_Tr_001341	205	.	.	.	0	0	0	0	0	0	0	0	0	0	0	0	0	0	0	0
Am_Tr_001342	2513	TKY58052.1_Transcription initiation factor TFIID subunit 5 [Spatholobus suberectus]	AT5G25150.2_TBP-associated factor 5, GeneName=TAF5	IPR037264_TFIID subunit TAF5, NTD2 domain superfamily; IPR036322_WD40-repeat-containing domain superfamily; IPR007582_TFIID subunit TAF5, NTD2 domain; IPR001680_WD40 repeat	1.07333	0.483333	1.00333	0.563333	1.16	1.83	0.23	0.52	0.93	0	1.19	1.32	0.5	0	0.86	0.83
Am_Tr_001343	2456	TKY58052.1_Transcription initiation factor TFIID subunit 5 [Spatholobus suberectus]	AT5G25150.2_TBP-associated factor 5, GeneName=TAF5	IPR001680_WD40 repeat; IPR007582_TFIID subunit TAF5, NTD2 domain; IPR020472_G-protein beta WD-40 repeat; IPR037264_TFIID subunit TAF5, NTD2 domain superfamily; IPR036322_WD40-repeat-containing domain superfamily	0.403333	0.896667	0.146667	0.44	0.8	0.2	0.21	0	1.31	1.38	0.05	0	0.39	0	0.62	0.7
Am_Tr_001344	532	RDY14040.1_Transcription initiation factor TFIID subunit 5, partial [Mucuna pruriens]	AT5G25150.2_TBP-associated factor 5, GeneName=TAF5	IPR037264_TFIID subunit TAF5, NTD2 domain superfamily; IPR007582_TFIID subunit TAF5, NTD2 domain	0.476667	0.7	0.653333	0.7	0	1.43	0	0	2.1	0	1.38	0.58	0	0	0.86	1.24
Am_Tr_001345	2092	XP_003603301.2_transcription initiation factor TFIID subunit 5 [Medicago truncatula] AES73552.2 TBP-associated factor 5 [Medicago truncatula] RHN70572.1 putative transcription factor WD40-like family [Medicago truncatula]	AT5G25150.1_TBP-associated factor 5, GeneName=TAF5	IPR020472_G-protein beta WD-40 repeat; IPR001680_WD40 repeat; IPR036322_WD40-repeat-containing domain superfamily	0.16	0.103333	1.47	0.336667	0.16	0.28	0.04	0.26	0.01	0.04	4.09	0	0.32	0	0.43	0.58
Am_Tr_001346	3621	XP_012571685.1_transcription initiation factor TFIID subunit 5 isoform X1 [Cicer arietinum]	AT5G25150.2_TBP-associated factor 5, GeneName=TAF5	IPR007582_TFIID subunit TAF5, NTD2 domain; IPR037264_TFIID subunit TAF5, NTD2 domain superfamily	0	0.153333	0.256667	0.08	0	0	0	0	0	0.46	0.34	0.43	0	0.24	0	0
Am_Tr_001347	1334	TKY58052.1_Transcription initiation factor TFIID subunit 5 [Spatholobus suberectus]	AT5G25150.2_TBP-associated factor 5, GeneName=TAF5	IPR007582_TFIID subunit TAF5, NTD2 domain; IPR037264_TFIID subunit TAF5, NTD2 domain superfamily	0.133333	0	0	0.41	0.4	0	0	0	0	0	0	0	0	0.98	0	0.25
Am_Tr_001348	2126	XP_027941720.1_transcription initiation factor TFIID subunit 5-like isoform X5 [Vigna unguiculata]	AT5G25150.2_TBP-associated factor 5, GeneName=TAF5	IPR036322_WD40-repeat-containing domain superfamily; IPR001680_WD40 repeat; IPR020472_G-protein beta WD-40 repeat	0.166667	0.293333	0.386667	0.44	0.25	0.25	0	0.67	0.21	0	0.73	0	0.43	0.87	0.45	0
Am_Tr_001349	2549	XP_003603301.2_transcription initiation factor TFIID subunit 5 [Medicago truncatula] AES73552.2 TBP-associated factor 5 [Medicago truncatula] RHN70572.1 putative transcription factor WD40-like family [Medicago truncatula]	AT5G25150.1_TBP-associated factor 5, GeneName=TAF5	IPR001680_WD40 repeat; IPR037264_TFIID subunit TAF5, NTD2 domain superfamily; IPR036322_WD40-repeat-containing domain superfamily; IPR007582_TFIID subunit TAF5, NTD2 domain; IPR020472_G-protein beta WD-40 repeat	5.91333	18.0233	13.48	18.7467	5.32	8.67	3.75	16.7	21.14	16.23	9.76	15.98	14.7	17.36	18.43	20.45
Am_Tr_001350	2456	TKY58052.1_Transcription initiation factor TFIID subunit 5 [Spatholobus suberectus]	AT5G25150.2_TBP-associated factor 5, GeneName=TAF5	IPR001680_WD40 repeat; IPR007582_TFIID subunit TAF5, NTD2 domain; IPR037264_TFIID subunit TAF5, NTD2 domain superfamily; IPR036322_WD40-repeat-containing domain superfamily; IPR020472_G-protein beta WD-40 repeat	5.65667	5.95333	4.78667	6.65667	9.62	4.03	3.32	6.21	6.29	5.36	3.99	5.93	4.44	6.9	7.27	5.8
Am_Tr_001351	2247	RDX81787.1_Serine carboxypeptidase-like 45, partial [Mucuna pruriens]	AT1G28110.2_serine carboxypeptidase-like 45, GeneName=SCPL45	IPR001563_Peptidase S10, serine carboxypeptidase; IPR029058_Alpha/Beta hydrolase fold	0.793333	3.22	12.36	7.56	0.16	0.24	1.98	1.37	5.98	2.31	11.79	13	12.29	5.57	10.37	6.74
Am_Tr_001352	4882	XP_004494514.2_uncharacterized protein LOC101501160 [Cicer arietinum]	AT3G62200.1_Putative endonuclease or glycosyl hydrolase	IPR021139_NYN domain, MARF1-type; IPR025677_OST-HTH associated domain	0	0	0	0	0	0	0	0	0	0	0	0	0	0	0	0
Am_Tr_001353	2008	KHN49021.1_hypothetical protein glysoja_031232, partial [Glycine soja]	.	.	0.46	3.31333	1.75333	2.52667	0.41	0.56	0.41	4.71	3.05	2.18	2.95	1.07	1.24	3.35	2.36	1.87
Am_Tr_001354	2864	KHN49021.1_hypothetical protein glysoja_031232, partial [Glycine soja]	AT5G42880.1_WEAK CHLOROPLAST MOVEMENT UNDER BLUE LIGHT-like protein (DUF827)	.	0.713333	1.21	0.873333	0.61	1.69	0.45	0	2.41	0.41	0.81	0.77	0.66	1.19	1.83	0	0
Am_Tr_001355	4787	XP_004494514.2_uncharacterized protein LOC101501160 [Cicer arietinum]	AT3G62200.1_Putative endonuclease or glycosyl hydrolase	IPR021139_NYN domain, MARF1-type; IPR025677_OST-HTH associated domain	0	0	0	0	0	0	0	0	0	0	0	0	0	0	0	0
Am_Tr_001356	5922	XP_004494514.2_uncharacterized protein LOC101501160 [Cicer arietinum]	AT3G62200.1_Putative endonuclease or glycosyl hydrolase	IPR021139_NYN domain, MARF1-type; IPR025677_OST-HTH associated domain	0.233333	0.62	0	1.07667	0	0.07	0.63	0	0	1.86	0	0	0	0	0.67	2.56
Am_Tr_001357	2769	KHN49021.1_hypothetical protein glysoja_031232, partial [Glycine soja]	AT5G42880.1_WEAK CHLOROPLAST MOVEMENT UNDER BLUE LIGHT-like protein (DUF827)	.	4.5	1.18667	1.37667	2.32333	5.48	3.73	4.29	0.9	0.92	1.74	1.98	1.83	0.32	2.76	1.29	2.92
Am_Tr_001358	1824	MCI06267.1_serine carboxypeptidase-like 45 [Trifolium medium]	AT1G28110.2_serine carboxypeptidase-like 45, GeneName=SCPL45	.	0.0833333	0	0.163333	0	0.25	0	0	0	0	0	0.49	0	0	0	0	0
Am_Tr_001359	1402	ONK67266.1_uncharacterized protein A4U43_C06F18360 [Asparagus officinalis]	AT5G42880.1_WEAK CHLOROPLAST MOVEMENT UNDER BLUE LIGHT-like protein (DUF827)	.	2.32	3.00333	6.62	2.99667	0	3.89	3.07	5.04	1.94	2.03	16.57	1.63	1.66	4.7	2.72	1.57
Am_Tr_001360	5827	XP_004494514.2_uncharacterized protein LOC101501160 [Cicer arietinum]	AT3G62200.1_Putative endonuclease or glycosyl hydrolase	IPR021139_NYN domain, MARF1-type; IPR025677_OST-HTH associated domain	4.43333	4.55333	2.34333	2.87667	8.33	3.06	1.91	4.02	5.88	3.76	1.68	3.21	2.14	3.07	4.51	1.05
Am_Tr_001361	4177	XP_004494514.2_uncharacterized protein LOC101501160 [Cicer arietinum]	AT3G62200.1_Putative endonuclease or glycosyl hydrolase	IPR021139_NYN domain, MARF1-type; IPR025677_OST-HTH associated domain	13.66	8.42	5.35	6.94667	11.7	9.08	20.2	6.58	7.73	10.95	4.74	5.64	5.67	8.59	5.98	6.27
Am_Tr_001362	1729	MCI06267.1_serine carboxypeptidase-like 45 [Trifolium medium]	AT1G28110.2_serine carboxypeptidase-like 45, GeneName=SCPL45	.	0	0	0	0	0	0	0	0	0	0	0	0	0	0	0	0
Am_Tr_001363	4928	XP_004494514.2_uncharacterized protein LOC101501160 [Cicer arietinum]	AT3G62200.1_Putative endonuclease or glycosyl hydrolase	IPR021139_NYN domain, MARF1-type; IPR025677_OST-HTH associated domain	25.8333	24.3967	23.34	28.9367	17.3	35.7	24.5	22.8	27.46	22.93	17.35	27.11	25.56	27.3	28.02	31.49
Am_Tr_001364	349	XP_007141394.1_hypothetical protein PHAVU_008G191600g [Phaseolus vulgaris] ESW13388.1 hypothetical protein PHAVU_008G191600g [Phaseolus vulgaris]	AT1G06520.1_glycerol-3-phosphate acyltransferase 1, GeneName=GPAT1	.	0	3.90667	2.17	2.59667	0	0	0	2.09	4.08	5.55	0	3.36	3.15	1.4	3.6	2.79
Am_Tr_001365	3623	XP_003621733.2_fanconi-associated nuclease 1 homolog [Medicago truncatula] AES77951.2 fanconi-associated nuclease-like protein [Medicago truncatula] RHN44708.1 putative phosphodiesterase I [Medicago truncatula]	AT1G48360.6_zinc ion binding/nucleic acid binding/hydrolase	IPR014883_VRR-NUC domain	1.32667	2.54667	2.66333	4.2	0.97	0.83	2.18	3.77	1.63	2.24	0.68	3.87	3.44	3.6	3.73	5.27
Am_Tr_001366	3601	XP_012568883.1_fanconi-associated nuclease 1 homolog isoform X1 [Cicer arietinum]	AT1G48360.2_zinc ion binding/nucleic acid binding/hydrolase	IPR014883_VRR-NUC domain; IPR014905_HIRAN domain; IPR006642_Rad18, zinc finger UBZ4-type	2.75	4.48	2.27667	1.34333	5.31	2.29	0.65	2.76	5.52	5.16	3.57	1.9	1.36	1.67	2.36	0
Am_Tr_001367	1888	XP_013447573.1_serine carboxypeptidase-like 25 [Medicago truncatula] KEH21654.1 serine carboxypeptidase-like protein [Medicago truncatula] RHN44401.1 putative carboxypeptidase D [Medicago truncatula]	AT3G02110.1_serine carboxypeptidase-like 25, GeneName=scpl25	IPR029058_Alpha/Beta hydrolase fold; IPR001563_Peptidase S10, serine carboxypeptidase	0.0166667	39.4533	9.26333	4.26333	0	0	0.05	39.55	42.66	36.15	7.41	10.55	9.83	4.87	4.92	3
Am_Tr_001368	1657	XP_017418766.1_PREDICTED: uncharacterized protein LOC108329187 [Vigna angularis] KAG2406435.1 uncharacterized protein HKW66_Vig0056910 [Vigna angularis] KOM39304.1 hypothetical protein LR48_Vigan03g268600 [Vigna angularis] BAT86149.1 hypothetical protein VIGAN_04377300 [Vigna angularis var. angularis]	AT3G62200.1_Putative endonuclease or glycosyl hydrolase	IPR021139_NYN domain, MARF1-type	4.3	13.3433	3.32667	16.35	2.22	7.89	2.79	20.89	10.18	8.96	2.44	3.08	4.46	28.99	8.09	11.97
Am_Tr_001369	5018	XP_004506039.1_helicase protein MOM1-like [Cicer arietinum]	.	.	0.486667	0.303333	0.24	0.493333	0.82	0.31	0.33	0.45	0.46	0	0.14	0.31	0.27	0.16	0.73	0.59
Am_Tr_001370	2440	XP_004506039.1_helicase protein MOM1-like [Cicer arietinum]	.	.	0.15	0.09	0.1	0.126667	0.36	0	0.09	0.19	0.08	0	0	0.25	0.05	0.23	0	0.15
Am_Tr_001371	5646	TKY67201.1_Helicase protein MOM1 [Spatholobus suberectus]	.	.	0	0.27	0	0.12	0	0	0	0.5	0.13	0.18	0	0	0	0.17	0.03	0.16
Am_Tr_001372	1457	RDX93301.1_Helicase protein MOM1, partial [Mucuna pruriens]	.	.	0.303333	0	0	0.0866667	0.79	0	0.12	0	0	0	0	0	0	0	0.26	0
Am_Tr_001373	6635	TKY67201.1_Helicase protein MOM1 [Spatholobus suberectus]	.	.	0.05	0.273333	0.0633333	0.0933333	0	0.15	0	0.24	0.58	0	0.05	0	0.14	0	0.2	0.08
Am_Tr_001374	4939	TKY67201.1_Helicase protein MOM1 [Spatholobus suberectus]	.	.	6.10333	5.62667	4.57	6.64333	8.22	4.77	5.32	4.31	6.3	6.27	3.06	5.37	5.28	5.55	6.96	7.42
Am_Tr_001375	6271	TKY67201.1_Helicase protein MOM1 [Spatholobus suberectus]	.	.	0	0.0533333	0	0.08	0	0	0	0	0	0.16	0	0	0	0.24	0	0
Am_Tr_001376	6074	TKY67201.1_Helicase protein MOM1 [Spatholobus suberectus]	.	.	0.02	0.0866667	0.186667	0.06	0	0	0.06	0	0	0.26	0	0.42	0.14	0	0	0.18
Am_Tr_001377	4464	TKY67201.1_Helicase protein MOM1 [Spatholobus suberectus]	.	.	0.116667	0.356667	1.23667	0.366667	0	0.2	0.15	0.14	0.8	0.13	2.83	0.33	0.55	0.95	0.15	0
Am_Tr_001378	2206	XP_004506039.1_helicase protein MOM1-like [Cicer arietinum]	.	.	0.113333	0.173333	0.163333	0.0633333	0	0.34	0	0.39	0	0.13	0.19	0.22	0.08	0.09	0.1	0
Am_Tr_001379	5085	TKY67201.1_Helicase protein MOM1 [Spatholobus suberectus]	.	.	0.28	0.263333	0.586667	0.26	0.84	0	0	0	0.63	0.16	0	1.65	0.11	0	0.22	0.56
Am_Tr_001380	2987	KYP77525.1_Retrovirus-related Pol polyprotein LINE-1, partial [Cajanus cajan]	.	.	0.246667	0.136667	0.37	0.0466667	0.03	0.21	0.5	0.17	0.15	0.09	0.03	0.46	0.62	0	0.11	0.03
Am_Tr_001381	269	.	.	.	0	0	0.496667	0	0	0	0	0	0	0	0	1.49	0	0	0	0
Am_Tr_001382	1216	XP_004499844.1_uncharacterized protein LOC101491770 [Cicer arietinum]	AT1G05970.2_RNA-binding (RRM/RBD/RNP motifs) family protein	IPR035979_RNA-binding domain superfamily	0.65	0.426667	0.62	1.31667	0.52	0.19	1.24	0	0	1.28	0.84	0	1.02	1.17	0	2.78
Am_Tr_001383	1126	XP_004499844.1_uncharacterized protein LOC101491770 [Cicer arietinum]	AT1G05970.2_RNA-binding (RRM/RBD/RNP motifs) family protein	IPR035979_RNA-binding domain superfamily	6.32	21.4733	16.8233	21.5667	4.69	8.71	5.56	19.3	23.11	22.01	16.87	17.9	15.7	22.51	19.35	22.84
Am_Tr_001384	1111	XP_004499844.1_uncharacterized protein LOC101491770 [Cicer arietinum]	AT1G05970.1_RNA-binding (RRM/RBD/RNP motifs) family protein	IPR035979_RNA-binding domain superfamily	0	0	0.586667	0	0	0	0	0	0	0	0	1.76	0	0	0	0
Am_Tr_001385	1307	XP_004499844.1_uncharacterized protein LOC101491770 [Cicer arietinum]	AT1G05970.2_RNA-binding (RRM/RBD/RNP motifs) family protein	IPR035979_RNA-binding domain superfamily	1.15	6.11667	5.05667	6.1	2.45	0	1	6.73	4.04	7.58	8.54	0.46	6.17	7.79	3.97	6.54
Am_Tr_001386	1468	.	.	.	1.02667	0	0	0	1.77	0.69	0.62	0	0	0	0	0	0	0	0	0
Am_Tr_001387	1743	XP_028192780.1_cellulose synthase-like protein H1 [Glycine soja] KHN44861.1 Cellulose synthase-like protein B3 [Glycine soja] RZB76632.1 Cellulose synthase-like protein H1 isoform B [Glycine soja]	AT2G32540.1_cellulose synthase-like B4, GeneName=CSLB04	IPR029044_Nucleotide-diphospho-sugar transferases; IPR005150_Cellulose synthase	0.0433333	3.60667	0.303333	0.953333	0.13	0	0	2.29	2.86	5.67	0	0.91	0	0.98	0.67	1.21
Am_Tr_001388	2788	XP_003596942.1_cellulose synthase-like protein H1 [Medicago truncatula] AES67193.1 cellulose synthase H1-like protein [Medicago truncatula]	AT2G32540.1_cellulose synthase-like B4, GeneName=CSLB04	IPR029044_Nucleotide-diphospho-sugar transferases; IPR005150_Cellulose synthase	0.296667	0.226667	1.66	0.11	0.44	0.18	0.27	0.04	0.64	0	1.09	1.92	1.97	0.15	0.05	0.13
Am_Tr_001389	3468	PNY03283.1_cellulose synthase-like protein h1, partial [Trifolium pratense]	AT4G15320.5_cellulose synthase-like B6, GeneName=CSLB06	IPR005150_Cellulose synthase	0	0.353333	0	0	0	0	0	0.33	0.73	0	0	0	0	0	0	0
Am_Tr_001390	1341	KEH39004.1_cellulose synthase H1-like protein [Medicago truncatula]	AT2G32540.1_cellulose synthase-like B4, GeneName=CSLB04	IPR029044_Nucleotide-diphospho-sugar transferases; IPR005150_Cellulose synthase	0.03	33.05	0.0233333	0.03	0	0.09	0	35.83	16.92	46.4	0	0	0.07	0.09	0	0
Am_Tr_001391	2917	XP_004487424.1_cellulose synthase-like protein B4 isoform X2 [Cicer arietinum]	AT2G32540.1_cellulose synthase-like B4, GeneName=CSLB04	IPR005150_Cellulose synthase	0	0.34	0	0	0	0	0	0.99	0.03	0	0	0	0	0	0	0
Am_Tr_001392	516	KAH1143944.1_hypothetical protein GYH30_034255 [Glycine max]	AT2G32540.1_cellulose synthase-like B4, GeneName=CSLB04	IPR005150_Cellulose synthase	0	47.32	0.15	0	0	0	0	47.77	23.67	70.52	0	0.45	0	0	0	0
Am_Tr_001393	2716	XP_004487424.1_cellulose synthase-like protein B4 isoform X2 [Cicer arietinum]	AT2G32540.1_cellulose synthase-like B4, GeneName=CSLB04	IPR029044_Nucleotide-diphospho-sugar transferases; IPR005150_Cellulose synthase	0	15.18	8.80333	4.88333	0	0	0	11.81	17.96	15.77	8.32	8.64	9.45	3.99	6.02	4.64
Am_Tr_001394	2668	XP_045803892.1_cellulose synthase-like protein B4 [Trifolium pratense]	AT2G32540.1_cellulose synthase-like B4, GeneName=CSLB04	IPR005150_Cellulose synthase	4.26333	38.8467	2.51667	14.4733	5.32	5.25	2.22	36.95	35.45	44.14	0.97	2.68	3.9	18.99	11.59	12.84
Am_Tr_001395	3267	PNY03283.1_cellulose synthase-like protein h1, partial [Trifolium pratense]	AT4G15320.5_cellulose synthase-like B6, GeneName=CSLB06	IPR029044_Nucleotide-diphospho-sugar transferases; IPR005150_Cellulose synthase	4.27	40.5367	1.98667	15.2033	5.26	4.28	3.27	38.61	33.64	49.36	1.13	2.34	2.49	25.01	8.99	11.61
Am_Tr_001396	472	XP_027343349.1_cellulose synthase-like protein H1 [Abrus precatorius]	AT2G32540.1_cellulose synthase-like B4, GeneName=CSLB04	.	0.253333	0.7	2.30333	0	0.38	0.38	0	0	2.1	0	1.87	2.12	2.92	0	0	0
Am_Tr_001397	336	.	.	.	0	1.71667	0	0	0	0	0	1.53	0.9	2.72	0	0	0	0	0	0
Am_Tr_001398	1057	.	.	.	1.55333	0.286667	0.393333	0.766667	1.44	3.22	0	0.23	0.63	0	0	1.18	0	0.67	1.63	0
Am_Tr_001399	7214	RDX64251.1_Nuclear pore complex protein NUP1, partial [Mucuna pruriens]	AT3G10650.1_nuclear pore complex protein, GeneName=NUP1	.	6.32	5.81667	4.95667	7.37	7.56	8.11	3.29	5.16	6.37	5.92	3.45	4.82	6.6	6.57	6.19	9.35
Am_Tr_001400	4211	TKY51774.1_Nuclear pore complex protein NUP1 [Spatholobus suberectus]	AT3G10650.1_nuclear pore complex protein, GeneName=NUP1	.	3.82	7.81667	6.04	7.35667	6.13	3.73	1.6	6.68	8.88	7.89	4.91	6.79	6.42	6.41	8.96	6.7
Am_Tr_001401	2133	XP_027367726.1_nuclear pore complex protein NUP1 isoform X3 [Abrus precatorius]	AT3G10650.1_nuclear pore complex protein, GeneName=NUP1	.	24.4233	10.3633	8.62333	12.2	31.48	22.18	19.61	9.98	11.44	9.67	1.58	12.82	11.47	6.31	14.18	16.11
Am_Tr_001402	7117	RDX64251.1_Nuclear pore complex protein NUP1, partial [Mucuna pruriens]	AT3G10650.1_nuclear pore complex protein, GeneName=NUP1	.	3.25667	1.45667	1.22333	0.523333	3.73	0.89	5.15	1.84	1.69	0.84	1.81	1.47	0.39	0.43	0.45	0.69
Am_Tr_001403	1032	.	.	.	2.99	2.23	3.57333	6.51333	5.05	0	3.92	1.93	0	4.76	4.06	0	6.66	4.24	0	15.3
Am_Tr_001404	4305	TKY51774.1_Nuclear pore complex protein NUP1 [Spatholobus suberectus]	AT3G10650.1_nuclear pore complex protein, GeneName=NUP1	.	1.72667	1.1	0.186667	0.433333	0.4	0.07	4.71	1.25	1.56	0.49	0.56	0	0	0.3	0	1
Am_Tr_001405	4676	TKY51774.1_Nuclear pore complex protein NUP1 [Spatholobus suberectus]	AT3G10650.1_nuclear pore complex protein, GeneName=NUP1	.	0.316667	1.5	0.453333	0.896667	0.43	0.52	0	1.53	0.85	2.12	0	1.36	0	0.99	0	1.7
Am_Tr_001406	4256	XP_004498067.1_nuclear pore complex protein NUP1-like isoform X4 [Cicer arietinum] XP_004498068.1 nuclear pore complex protein NUP1-like isoform X4 [Cicer arietinum]	AT3G10650.1_nuclear pore complex protein, GeneName=NUP1	.	19.3367	7.94333	7.56	10.3433	22.6	15.3	20.11	7.67	8.05	8.11	6.3	9.77	6.61	9.52	11.66	9.85
Am_Tr_001407	4426	TKY51774.1_Nuclear pore complex protein NUP1 [Spatholobus suberectus]	AT3G10650.1_nuclear pore complex protein, GeneName=NUP1	.	0.13	0.0366667	0.183333	0.24	0.28	0	0.11	0	0	0.11	0	0	0.55	0.3	0.02	0.4
Am_Tr_001408	4797	TKY51774.1_Nuclear pore complex protein NUP1 [Spatholobus suberectus]	AT3G10650.1_nuclear pore complex protein, GeneName=NUP1	.	0.1	0.763333	0.24	0.636667	0.16	0	0.14	1.33	0.77	0.19	0	0.5	0.22	0.45	1.32	0.14
Am_Tr_001409	462	.	.	.	0	0.146667	0.106667	0	0	0	0	0	0.44	0	0.32	0	0	0	0	0
Am_Tr_001410	414	.	.	.	0	0	0.133333	0.323333	0	0	0	0	0	0	0.4	0	0	0.48	0.49	0
Am_Tr_001411	2771	KAH1263165.1_Senescence-associated protein SPA15, chloroplastic [Glycine max]	AT1G66330.1_senescence-associated family protein	.	0.293333	2.29333	1.02667	0.286667	0.4	0.2	0.28	4.81	1.37	0.7	0.59	0.89	1.6	0.31	0	0.55
Am_Tr_001412	276	MCH86182.1_senescence-associated family protein [Trifolium medium]	AT1G66330.1_senescence-associated family protein	.	3.07	8.57333	2.95333	4.24	3.44	4.44	1.33	4.21	11.81	9.7	1.18	2.33	5.35	1.39	8.58	2.75
Am_Tr_001413	1850	RYQ99656.1_hypothetical protein Ahy_B07g087622 isoform C [Arachis hypogaea]	AT1G66330.1_senescence-associated family protein	.	0	0.736667	0.53	0	0	0	0	1.12	0.57	0.52	0.43	0.43	0.73	0	0	0
Am_Tr_001414	2683	XP_004490814.1_senescence-associated protein AAF, chlorolplastic [Cicer arietinum] XP_012568500.1 senescence-associated protein AAF, chlorolplastic [Cicer arietinum]	AT1G66330.1_senescence-associated family protein	IPR016024_Armadillo-type fold	2.69333	72.96	31.2767	17.3167	1.25	4.91	1.92	86.64	62.17	70.07	19.42	38.09	36.32	17.68	18.24	16.03
Am_Tr_001415	1750	RYQ99656.1_hypothetical protein Ahy_B07g087622 isoform C [Arachis hypogaea]	AT1G66330.1_senescence-associated family protein	.	0.05	1.74667	1.28333	0.483333	0	0.08	0.07	2.36	1.63	1.25	1.07	1.87	0.91	0.63	0.64	0.18
Am_Tr_001416	271	KAF4377921.1_hypothetical protein F8388_018522 [Cannabis sativa]	AT1G66330.1_senescence-associated family protein	.	4.01333	16.88	6.60667	14.7533	8.98	1.63	1.43	15.01	12.65	22.98	7.54	4.35	7.93	16.25	4.58	23.43
Am_Tr_001417	2072	XP_031396922.1_senescence-associated protein SPA15, chloroplastic isoform X2 [Punica granatum]	AT1G66330.1_senescence-associated family protein	.	0.183333	0.87	0.33	0.393333	0.13	0.09	0.33	1.11	0.53	0.97	0.42	0.21	0.36	0.63	0.42	0.13
Am_Tr_001418	615	.	.	.	0.133333	0.246667	0.0866667	0.0233333	0	0.4	0	0	0.74	0	0	0	0.26	0.07	0	0
Am_Tr_001419	997	XP_004504125.1_uncharacterized protein LOC101498637 [Cicer arietinum]	AT1G67850.4_lysine ketoglutarate reductase trans-splicing protein (DUF707)	IPR007877_Protein of unknown function DUF707	17.8533	2.48667	3.47333	8.07	15.14	23.38	15.04	1.56	3.72	2.18	2.08	4.35	3.99	3.54	15.59	5.08
Am_Tr_001420	1917	GAU36664.1_hypothetical protein TSUD_213180 [Trifolium subterraneum]	AT3G55830.1_Nucleotide-diphospho-sugar transferases superfamily protein, GeneName=EPC1	IPR015338_Glycosyl transferase 64 domain; IPR029044_Nucleotide-diphospho-sugar transferases	21.7867	18.8333	14.2833	17.7867	19.68	22.2	23.48	20.64	17.18	18.68	8.37	18.45	16.03	20.95	17.05	15.36
Am_Tr_001421	1675	KAG4986143.1_hypothetical protein JHK86_033834 [Glycine max]	AT1G08040.3_trimethylguanosine synthase (DUF707)	IPR015338_Glycosyl transferase 64 domain	1.75667	6.33333	4.16667	3.36	2.03	2.71	0.53	6.22	8.72	4.06	4.25	5.25	3	3.77	3.55	2.76
Am_Tr_001422	1491	KAG4986143.1_hypothetical protein JHK86_033834 [Glycine max]	AT1G08040.3_trimethylguanosine synthase (DUF707)	IPR015338_Glycosyl transferase 64 domain	9.69333	34.2733	20.2733	19.29	16.2	7.58	5.3	32.15	33.98	36.69	26.67	18.93	15.22	18.31	22.87	16.69
Am_Tr_001423	1422	XP_020237280.1_uncharacterized protein LOC109816618 [Cajanus cajan] XP_020237281.1 uncharacterized protein LOC109816618 [Cajanus cajan] KYP44889.1 Uncharacterized protein C24B11.05 [Cajanus cajan]	AT5G02230.1_Haloacid dehalogenase-like hydrolase (HAD) superfamily protein	IPR006439_HAD hydrolase, subfamily IA; IPR010237_Pyrimidine 5-nucleotidase; IPR036412_HAD-like superfamily; IPR041492_Haloacid dehalogenase-like hydrolase	2.74	21.8033	70.99	5.05	0	2.52	5.7	15.33	24.38	25.7	62.76	78.78	71.43	3.23	2.65	9.27
Am_Tr_001424	1389	XP_013455015.1_suppressor of disruption of TFIIS [Medicago truncatula] XP_024638476.1 suppressor of disruption of TFIIS [Medicago truncatula] KEH29061.1 haloacid dehalogenase-like hydrolase [Medicago truncatula] RHN59129.1 putative pyridoxal phosphatase [Medicago truncatula]	AT5G02230.3_Haloacid dehalogenase-like hydrolase (HAD) superfamily protein	IPR041492_Haloacid dehalogenase-like hydrolase; IPR036412_HAD-like superfamily; IPR006439_HAD hydrolase, subfamily IA; IPR010237_Pyrimidine 5-nucleotidase	5.33333	2.46	110.977	1.1	0.5	11.97	3.53	0	6.87	0.51	99.95	119.5	113.48	0.52	1.8	0.98
Am_Tr_001425	4098	XP_004503714.1_kinesin-like protein KIN-14J [Cicer arietinum] XP_004503715.1 kinesin-like protein KIN-14J [Cicer arietinum]	AT1G63640.1_P-loop nucleoside triphosphate hydrolases superfamily protein with CH (Calponin Homology) domain-containing protein	IPR001752_Kinesin motor domain; IPR027417_P-loop containing nucleoside triphosphate hydrolase; IPR036872_CH domain superfamily; IPR001715_Calponin homology domain	0.383333	3.07667	6.89	4.39333	0.55	0.42	0.18	1.96	4.87	2.4	7.5	7.5	5.67	3.75	3.86	5.57
Am_Tr_001426	220	.	.	.	0	0	1.26	0	0	0	0	0	0	0	0	3.78	0	0	0	0
Am_Tr_001427	2089	TKY56844.1_Glycosyltransferase family 64 protein C4 [Spatholobus suberectus]	AT3G55830.1_Nucleotide-diphospho-sugar transferases superfamily protein, GeneName=EPC1	IPR029044_Nucleotide-diphospho-sugar transferases; IPR015338_Glycosyl transferase 64 domain	8.61333	1.74	3.60333	3.65	7.49	6.48	11.87	1.44	2.12	1.66	2.26	3.77	4.78	2.76	3.3	4.89
Am_Tr_001428	6153	XP_004504106.1_pentatricopeptide repeat-containing protein At4g02750-like [Cicer arietinum] XP_012572223.1 pentatricopeptide repeat-containing protein At4g02750-like [Cicer arietinum] XP_027191351.1 pentatricopeptide repeat-containing protein At4g02750-like [Cicer arietinum]	AT1G20230.1_Pentatricopeptide repeat (PPR) superfamily protein	IPR002885_Pentatricopeptide repeat; IPR011990_Tetratricopeptide-like helical domain superfamily	0.213333	0.186667	0.31	0.593333	0.07	0.57	0	0	0.32	0.24	0	0.22	0.71	0.48	1.04	0.26
Am_Tr_001429	6055	RDX82121.1_Pentatricopeptide repeat-containing protein, partial [Mucuna pruriens]	AT3G23330.1_Tetratricopeptide repeat (TPR)-like superfamily protein	IPR002885_Pentatricopeptide repeat; IPR011990_Tetratricopeptide-like helical domain superfamily	0.666667	1.01667	0.14	1.05667	0.62	0.93	0.45	1.25	1.38	0.42	0.18	0.24	0	1.02	0.79	1.36
Am_Tr_001430	2502	XP_004504106.1_pentatricopeptide repeat-containing protein At4g02750-like [Cicer arietinum] XP_012572223.1 pentatricopeptide repeat-containing protein At4g02750-like [Cicer arietinum] XP_027191351.1 pentatricopeptide repeat-containing protein At4g02750-like [Cicer arietinum]	AT5G09950.2_Tetratricopeptide repeat (TPR)-like superfamily protein, GeneName=MEF7	IPR002885_Pentatricopeptide repeat; IPR011990_Tetratricopeptide-like helical domain superfamily; IPR032867_DYW domain	1.73667	1.42667	0.87	1.51667	3.82	1.22	0.17	1.19	1.68	1.41	0.74	0.66	1.21	1.84	2.71	0
Am_Tr_001431	6242	RDX82121.1_Pentatricopeptide repeat-containing protein, partial [Mucuna pruriens]	AT3G23330.2_Tetratricopeptide repeat (TPR)-like superfamily protein	IPR002885_Pentatricopeptide repeat; IPR011990_Tetratricopeptide-like helical domain superfamily	0.226667	0.5	0.19	0.323333	0.26	0.42	0	0.97	0	0.53	0	0.57	0	0.18	0.17	0.62
Am_Tr_001432	2788	RDX82121.1_Pentatricopeptide repeat-containing protein, partial [Mucuna pruriens]	AT2G37320.1_Tetratricopeptide repeat (TPR)-like superfamily protein	IPR032867_DYW domain	0.516667	0.473333	0.0833333	0.453333	0.38	0.91	0.26	0.31	0.77	0.34	0	0	0.25	0.62	0.74	0
Am_Tr_001433	2767	RDX82121.1_Pentatricopeptide repeat-containing protein, partial [Mucuna pruriens]	AT3G02330.1_Pentatricopeptide repeat (PPR) superfamily protein	IPR002885_Pentatricopeptide repeat	0.78	1.32667	0.646667	1.64333	0.39	0.87	1.08	1.12	0.76	2.1	0.76	0.86	0.32	1.77	0.88	2.28
Am_Tr_001434	2591	XP_006584019.1_pentatricopeptide repeat-containing protein At2g22070 isoform X1 [Glycine max] XP_014633706.1 pentatricopeptide repeat-containing protein At2g22070 isoform X1 [Glycine max] XP_028241662.1 pentatricopeptide repeat-containing protein At2g22070-like [Glycine soja] XP_028241663.1 pentatricopeptide repeat-containing protein At2g22070-like [Glycine soja] XP_028241664.1 pentatricopeptide …	AT3G23330.2_Tetratricopeptide repeat (TPR)-like superfamily protein	IPR002885_Pentatricopeptide repeat; IPR032867_DYW domain; IPR011990_Tetratricopeptide-like helical domain superfamily	0.85	1.70667	0.31	1.88667	0.23	1.4	0.92	1.71	1.9	1.51	0	0.38	0.55	1.62	1.98	2.06
Am_Tr_001435	2025	KYP61652.1_Putative pentatricopeptide repeat-containing protein At1g68930 family [Cajanus cajan]	AT3G23330.2_Tetratricopeptide repeat (TPR)-like superfamily protein	IPR032867_DYW domain	0.683333	0.84	0.366667	1.48	0.45	1.06	0.54	0.29	0.72	1.51	0.05	0.3	0.75	1.25	0.68	2.51
Am_Tr_001436	1685	TKY61431.1_translation initiation factor eIF-2B subunit epsilon [Spatholobus suberectus]	AT2G34970.1_Trimeric LpxA-like enzyme	IPR003307_W2 domain; IPR016024_Armadillo-type fold	0.0666667	1.09667	0.783333	0	0	0.2	0	0.88	0.46	1.95	0	0.96	1.39	0	0	0
Am_Tr_001437	2068	XP_004511344.1_protein phosphatase 2C 70 [Cicer arietinum]	AT5G19280.1_kinase associated protein phosphatase, GeneName=KAPP	IPR008984_SMAD/FHA domain superfamily; IPR000253_Forkhead-associated (FHA) domain; IPR001932_PPM-type phosphatase domain; IPR036457_PPM-type phosphatase domain superfamily	40.09	17.2667	17.8333	15.4933	69.93	23.02	27.32	16.62	17.31	17.87	16.23	19.19	18.08	12.3	16.02	18.16
Am_Tr_001438	2539	XP_027348978.1_translation initiation factor eIF-2B subunit epsilon isoform X1 [Abrus precatorius]	AT2G34970.1_Trimeric LpxA-like enzyme	IPR005835_Nucleotidyl transferase domain; IPR011004_Trimeric LpxA-like superfamily; IPR001451_Hexapeptide repeat; IPR029044_Nucleotide-diphospho-sugar transferases	0	1.72	0.97	2.06667	0	0	0	0.5	1.59	3.07	0	0.77	2.14	0	2.32	3.88
Am_Tr_001439	1790	TKY61431.1_translation initiation factor eIF-2B subunit epsilon [Spatholobus suberectus]	AT2G34970.1_Trimeric LpxA-like enzyme	IPR016024_Armadillo-type fold; IPR003307_W2 domain	0	0.57	0.0433333	1.00333	0	0	0	0	0.75	0.96	0.13	0	0	0.14	0.57	2.3
Am_Tr_001440	445	RZB49500.1_Translation initiation factor eIF-2B subunit epsilon [Glycine soja]	AT4G18300.1_Trimeric LpxA-like enzyme	.	2.63333	0	1.00333	1.13667	5.66	0.42	1.82	0	0	0	2.98	0.03	0	3.28	0.13	0
Am_Tr_001441	1360	KAF7800797.1_putative ribonuclease H protein [Senna tora] KAF7843343.1 putative ribonuclease H protein [Senna tora] KAF7843349.1 putative ribonuclease H protein [Senna tora]	AT2G34320.1_Polynucleotidyl transferase, ribonuclease H-like superfamily protein	IPR012337_Ribonuclease H-like superfamily; IPR002156_Ribonuclease H domain	5.36333	5.28333	1.75333	4.94333	11.44	4.65	0	12.2	3.65	0	2.14	3.12	0	10.24	4.59	0
Am_Tr_001442	2721	XP_027348978.1_translation initiation factor eIF-2B subunit epsilon isoform X1 [Abrus precatorius]	AT2G34970.1_Trimeric LpxA-like enzyme	IPR005835_Nucleotidyl transferase domain; IPR016024_Armadillo-type fold; IPR003307_W2 domain; IPR029044_Nucleotide-diphospho-sugar transferases; IPR011004_Trimeric LpxA-like superfamily; IPR001451_Hexapeptide repeat	0	0.196667	0.506667	0.06	0	0	0	0	0.49	0.1	0.39	0.09	1.04	0.08	0.1	0
Am_Tr_001443	1813	QHO11352.1_Protein phosphatase 2C [Arachis hypogaea] QHO11353.1 Protein phosphatase 2C [Arachis hypogaea]	AT5G19280.1_kinase associated protein phosphatase, GeneName=KAPP	IPR001932_PPM-type phosphatase domain; IPR036457_PPM-type phosphatase domain superfamily	4.32	4.18	2.83	4.74333	10.66	2.3	0	9.03	3.51	0	6.27	2.15	0.07	10.2	4.03	0
Am_Tr_001444	2644	XP_027348978.1_translation initiation factor eIF-2B subunit epsilon isoform X1 [Abrus precatorius]	AT2G34970.1_Trimeric LpxA-like enzyme	IPR005835_Nucleotidyl transferase domain; IPR011004_Trimeric LpxA-like superfamily; IPR001451_Hexapeptide repeat; IPR029044_Nucleotide-diphospho-sugar transferases	0	0.886667	0.133333	0.766667	0	0	0	0	0.85	1.81	0	0.4	0	0	0.64	1.66
Am_Tr_001445	2392	XP_013450567.1_translation initiation factor eIF-2B subunit epsilon isoform X1 [Medicago truncatula] KEH24595.1 initiation factor-2Bepsilon-like protein [Medicago truncatula] RHN49441.1 putative nucleotide-diphospho-sugar transferase [Medicago truncatula]	AT2G34970.1_Trimeric LpxA-like enzyme	IPR011004_Trimeric LpxA-like superfamily; IPR029044_Nucleotide-diphospho-sugar transferases; IPR005835_Nucleotidyl transferase domain; IPR001451_Hexapeptide repeat; IPR016024_Armadillo-type fold	1.48	3.73333	3.34667	4.62333	2.03	0.84	1.57	2.72	3.94	4.54	1.57	4.01	4.46	1.85	4.21	7.81
Am_Tr_001446	753	QHO11352.1_Protein phosphatase 2C [Arachis hypogaea] QHO11353.1 Protein phosphatase 2C [Arachis hypogaea]	AT5G19280.1_kinase associated protein phosphatase, GeneName=KAPP	IPR036457_PPM-type phosphatase domain superfamily; IPR001932_PPM-type phosphatase domain	0.426667	0.356667	0.8	0.523333	0.44	0.84	0	0.79	0	0.28	1.34	1.06	0	0.68	0.89	0
[truncated: 188,550 more rows]
