# Supplementary material for: Enhancing transcriptome analysis in medicinal plants: multiple unigene sets in Astragalus membranaceus
Source: Front Plant Sci. 2024 Feb 7;15:1301526. doi: 10.3389/fpls.2024.1301526 (PMC10879423; doi:10.3389/fpls.2024.1301526)
Supplement: Supplementary file 7 [file Table_6.xlsx]

## Sheet: Table S6
Supplementary Table 6. Expression information of unigene set-3 (Trinity-assembled contigs).
Unigene ID	Unigene length	Annotation description			Average TPM				Roots			Leaves			Flowers			Stems
		NR blast	Araport11	InterPro	Roots	Leaves	Flowers	Stems	R1	R2	R3	L1	L2	L3	F1	F2	F3	S1	S2	S3
Am_Tr_189997	553	.	.	.	0	0	0	0	0	0	0	0	0	0	0	0	0	0	0	0
Am_Tr_189998	894	.	.	.	0	0.853333	0	0.0933333	0	0	0	1.41	0.16	0.99	0	0	0	0.28	0	0
Am_Tr_189999	973	.	.	.	0	0.113333	0	0	0	0	0	0.34	0	0	0	0	0	0	0	0
Am_Tr_190000	1384	.	.	.	0.0266667	0.106667	0	0.11	0	0.08	0	0.32	0	0	0	0	0	0.16	0.17	0
Am_Tr_190001	438	.	.	.	0	0.19	0	0	0	0	0	0	0.57	0	0	0	0	0	0	0
Am_Tr_190002	736	TKY65852.1_yippee protein [Spatholobus suberectus]	AT2G40110.1_Yippee family putative zinc-binding protein	IPR004910_Yippee/Mis18/Cereblon	0	0.216667	1.12333	0	0	0	0	0	0.65	0	1.68	1.22	0.47	0	0	0
Am_Tr_190003	580	XP_023743474.1_protein yippee-like [Lactuca sativa] PLY66409.1 hypothetical protein LSAT_9X33821 [Lactuca sativa] CAB4113437.1 unnamed protein product [Lactuca saligna]	AT2G40110.1_Yippee family putative zinc-binding protein	.	0	0.52	0.15	0.0866667	0	0	0	0	0.64	0.92	0.45	0	0	0	0	0.26
Am_Tr_190004	334	XP_023743474.1_protein yippee-like [Lactuca sativa] PLY66409.1 hypothetical protein LSAT_9X33821 [Lactuca sativa] CAB4113437.1 unnamed protein product [Lactuca saligna]	AT2G40110.1_Yippee family putative zinc-binding protein	.	0	0.446667	0	0	0	0	0	0	1.34	0	0	0	0	0	0	0
Am_Tr_190005	326	.	.	.	0.253333	0	0	0	0	0	0.76	0	0	0	0	0	0	0	0	0
Am_Tr_190006	441	.	.	.	0.94	0	0	0	0.87	0.88	1.07	0	0	0	0	0	0	0	0	0
Am_Tr_190007	267	.	.	.	0	0	0	0	0	0	0	0	0	0	0	0	0	0	0	0
Am_Tr_190008	289	.	.	.	0.803333	0	0	0	0	1.29	1.12	0	0	0	0	0	0	0	0	0
Am_Tr_190009	512	.	.	.	0.473333	0	0	0	0	0.33	1.09	0	0	0	0	0	0	0	0	0
Am_Tr_190010	857	XP_046139458.1_uncharacterized protein B0J15DRAFT_473710 [Fusarium solani] KAH7274841.1 hypothetical protein B0J15DRAFT_473710 [Fusarium solani]	.	IPR010451_Acetoacetate decarboxylase; IPR023375_Acetoacetate decarboxylase domain superfamily	0.65	0	0	0	0	0	1.95	0	0	0	0	0	0	0	0	0
Am_Tr_190011	291	.	.	.	0	0	0	0	0	0	0	0	0	0	0	0	0	0	0	0
Am_Tr_190012	537	.	.	.	0	0.0866667	0.173333	0	0	0	0	0	0	0.26	0	0	0.52	0	0	0
Am_Tr_190013	2598	XP_045822248.1_pentatricopeptide repeat-containing protein At4g21065-like [Trifolium pratense]	AT1G08070.2_Tetratricopeptide repeat (TPR)-like superfamily protein, GeneName=OTP82	IPR032867_DYW domain; IPR002885_Pentatricopeptide repeat	0.113333	0.46	0.6	0.646667	0	0.28	0.06	0.31	0.4	0.67	0.6	0.65	0.55	0.36	0.49	1.09
Am_Tr_190014	1075	XP_046129272.1_uncharacterized protein B0J15DRAFT_527384 [Fusarium solani] KAH7249511.1 hypothetical protein B0J15DRAFT_527384 [Fusarium solani]	.	.	0.49	0	0	0	0	0.11	1.36	0	0	0	0	0	0	0	0	0
Am_Tr_190015	1374	XP_035327092.1_dolichyl-phosphate-mannose-protein mannosyltransferase [Colletotrichum scovillei] KAF4774089.1 dolichyl-phosphate-mannose-protein mannosyltransferase [Colletotrichum scovillei] KAG7048919.1 dolichyl-phosphate-mannose-protein mannosyltransferase [Colletotrichum scovillei] KAG7066082.1 dolichyl-phosphate-mannose-protein mannosyltransferase [Colletotrichum scovillei] KAG7068683.1 doli…	.	IPR016093_MIR motif; IPR036300_Mir domain superfamily; IPR032421_Protein O-mannosyl-transferase, C-terminal four TM domain	0	0	0.72	0.0266667	0	0	0	0	0	0	1.32	0	0.84	0	0	0.08
Am_Tr_190016	1159	XP_035327092.1_dolichyl-phosphate-mannose-protein mannosyltransferase [Colletotrichum scovillei] KAF4774089.1 dolichyl-phosphate-mannose-protein mannosyltransferase [Colletotrichum scovillei] KAG7048919.1 dolichyl-phosphate-mannose-protein mannosyltransferase [Colletotrichum scovillei] KAG7066082.1 dolichyl-phosphate-mannose-protein mannosyltransferase [Colletotrichum scovillei] KAG7068683.1 doli…	.	IPR016093_MIR motif; IPR032421_Protein O-mannosyl-transferase, C-terminal four TM domain; IPR036300_Mir domain superfamily	0	0	0.17	0	0	0	0	0	0	0	0.41	0.1	0	0	0	0
Am_Tr_190017	607	CCF43627.1_dolichyl-phosphate-mannose-proteinmannosyltransferase, partial [Colletotrichum higginsianum]	.	IPR016093_MIR motif; IPR003342_Glycosyl transferase family 39/83; IPR036300_Mir domain superfamily	0	0	0.206667	0	0	0	0	0	0	0	0.2	0	0.42	0	0	0
Am_Tr_190018	3140	XP_046136505.1_family 39 glycosyltransferase [Fusarium solani] KAH7271888.1 family 39 glycosyltransferase [Fusarium solani]	.	IPR003342_Glycosyl transferase family 39/83; IPR036300_Mir domain superfamily; IPR032421_Protein O-mannosyl-transferase, C-terminal four TM domain; IPR016093_MIR motif	0.613333	0	0	0	0	0.13	1.71	0	0	0	0	0	0	0	0	0
Am_Tr_190019	582	.	.	.	0.356667	0	0	0	0	1.07	0	0	0	0	0	0	0	0	0	0
Am_Tr_190020	1747	TKY70388.1_GATA transcription factor 18 [Spatholobus suberectus]	AT3G50870.1_GATA type zinc finger transcription factor family protein, GeneName=MNP	IPR000679_Zinc finger, GATA-type	0	0	0.433333	0.27	0	0	0	0	0	0	0.68	0.3	0.32	0.56	0	0.25
Am_Tr_190021	546	.	.	.	0	0	0	0	0	0	0	0	0	0	0	0	0	0	0	0
Am_Tr_190022	676	KXH43201.1_hypothetical protein CSAL01_03482 [Colletotrichum salicis]	.	IPR036236_Zinc finger C2H2 superfamily	0	0	0.533333	0	0	0	0	0	0	0	1.04	0.2	0.36	0	0	0
Am_Tr_190023	731	XP_046133313.1_major facilitator superfamily domain-containing protein [Fusarium solani] KAH7264446.1 major facilitator superfamily domain-containing protein [Fusarium solani]	.	IPR005828_Major facilitator, sugar transporter-like; IPR036259_MFS transporter superfamily	0.48	0	0	0	0	1.13	0.31	0	0	0	0	0	0	0	0	0
Am_Tr_190024	423	XP_003050588.1_uncharacterized protein NECHADRAFT_48646 [Fusarium vanettenii 77-13-4] EEU44875.1 predicted protein [Fusarium vanettenii 77-13-4]	.	.	0.393333	0	0	0	0	0	1.18	0	0	0	0	0	0	0	0	0
Am_Tr_190025	1375	KAH7092620.1_carboxylic acid transport protein [Paraphoma chrysanthemicola]	.	IPR036259_MFS transporter superfamily; IPR005828_Major facilitator, sugar transporter-like	0	0.03	0	0.493333	0	0	0	0	0.09	0	0	0	0	1.4	0	0.08
Am_Tr_190026	589	KHN49021.1_hypothetical protein glysoja_031232, partial [Glycine soja]	.	.	0.616667	2.08333	1.16667	0.903333	0.26	0.52	1.07	0.94	2.85	2.46	1.16	1.68	0.66	0.77	1.17	0.77
Am_Tr_190027	404	KAH1142575.1_hypothetical protein GYH30_033331 [Glycine max] KAH1220921.1 hypothetical protein GmHk_12G034449 [Glycine max]	.	.	1.02	0.53	0.16	1.19667	1.04	1.58	0.44	0	1.15	0.44	0	0.48	0	0.5	3.09	0
Am_Tr_190028	451	KAH1142575.1_hypothetical protein GYH30_033331 [Glycine max] KAH1220921.1 hypothetical protein GmHk_12G034449 [Glycine max]	.	.	0	0.27	0	0.136667	0	0	0	0	0.46	0.35	0	0	0	0	0.41	0
Am_Tr_190029	609	KAH1142575.1_hypothetical protein GYH30_033331 [Glycine max] KAH1220921.1 hypothetical protein GmHk_12G034449 [Glycine max]	.	.	1.38	0.156667	0	0.146667	0	0.5	3.64	0.47	0	0	0	0	0	0	0	0.44
Am_Tr_190030	438	KAH1142575.1_hypothetical protein GYH30_033331 [Glycine max] KAH1220921.1 hypothetical protein GmHk_12G034449 [Glycine max]	.	.	0	0.28	0.136667	0	0	0	0	0.84	0	0	0	0.41	0	0	0	0
Am_Tr_190031	258	.	.	.	0	0	1.69	1.22667	0	0	0	0	0	0	0	0	5.07	0	3.68	0
Am_Tr_190032	402	XP_001804264.1_hypothetical protein SNOG_14064 [Parastagonospora nodorum SN15] KAH3904448.1 hypothetical protein HBH56_233890 [Parastagonospora nodorum] EAT78689.1 hypothetical protein SNOG_14064 [Parastagonospora nodorum SN15] KAH3921338.1 hypothetical protein HBH54_241950 [Parastagonospora nodorum] KAH3944520.1 hypothetical protein HBH53_158300 [Parastagonospora nodorum] KAH3959329.1 hypothetic…	AT1G74060.1_Ribosomal protein L6 family protein	IPR000915_60S ribosomal protein L6E; IPR008991_Translation protein SH3-like domain superfamily	0	0.316667	0	0.683333	0	0	0	0.5	0	0.45	0	0	0	1.53	0.52	0
Am_Tr_190033	330	XP_014657746.1_60S ribosomal protein L6 [Moesziomyces antarcticus] ETS60791.1 hypothetical protein PaG_04703 [Moesziomyces aphidis DSM 70725] GAC72396.1 60s ribosomal protein L6 [Moesziomyces antarcticus T-34] GAK64106.1 60S ribosomal protein L6 [Moesziomyces antarcticus] SPO44675.1 probable 60S large subunit ribosomal protein L6 [Moesziomyces antarcticus]	AT1G74050.1_Ribosomal protein L6 family protein	IPR000915_60S ribosomal protein L6E; IPR008991_Translation protein SH3-like domain superfamily	0	0.236667	0.226667	0	0	0	0	0	0	0.71	0.68	0	0	0	0	0
Am_Tr_190034	224	KAG9194669.1_hypothetical protein G6011_04704 [Alternaria panax]	AT1G74060.1_Ribosomal protein L6 family protein	.	0	0	1.14	0	0	0	0	0	0	0	0	3.42	0	0	0	0
Am_Tr_190035	229	.	.	.	1.15333	0	0	0	0	3.46	0	0	0	0	0	0	0	0	0	0
Am_Tr_190036	309	MCI88497.1_hypothetical protein [Trifolium medium]	.	.	0	0	0.406667	0.333333	0	0	0	0	0	0	0	1.22	0	0	1	0
Am_Tr_190037	1656	XP_024028757.1_uncharacterized protein LOC112093792 [Morus notabilis]	.	.	0.62	0.253333	0.63	0.203333	0.67	0.6	0.59	0.06	0.29	0.41	0.33	0.71	0.85	0.4	0.14	0.07
Am_Tr_190038	720	MCI03960.1_hypothetical protein [Trifolium medium]	.	.	0.246667	0	0.343333	0.0633333	0.58	0	0.16	0	0	0	0.34	0.36	0.33	0	0.19	0
Am_Tr_190039	274	XP_038889767.1_uncharacterized protein LOC120079608 [Benincasa hispida]	.	.	1.02667	0.84	1.32667	0.49	1.52	1.56	0	0	0	2.52	1.21	2.77	0	0	1.47	0
Am_Tr_190040	387	XP_024043209.1_uncharacterized protein LOC112099912 [Citrus clementina]	.	.	0	0.39	0	0	0	0	0	0.54	0.63	0	0	0	0	0	0	0
Am_Tr_190041	305	XP_024959011.1_uncharacterized protein LOC112499984 [Cynara cardunculus var. scolymus]	.	.	0	2.76333	0	0	0	0	0	2.02	3.6	2.67	0	0	0	0	0	0
Am_Tr_190042	206	MCI24086.1_hypothetical protein [Trifolium medium]	.	.	0	0	0	0	0	0	0	0	0	0	0	0	0	0	0	0
Am_Tr_190043	316	MCI03960.1_hypothetical protein [Trifolium medium]	.	.	0	0.36	1.15333	0	0	0	0	0	1.08	0	0	2.63	0.83	0	0	0
Am_Tr_190044	319	XP_022032292.1_uncharacterized protein LOC110933371 [Helianthus annuus]	.	.	0	0	0	0.303333	0	0	0	0	0	0	0	0	0	0	0.91	0
Am_Tr_190045	332	.	.	.	0	0	0.51	0.266667	0	0	0	0	0	0	0	1.53	0	0.8	0	0
Am_Tr_190046	2813	XP_003042186.1_uncharacterized protein NECHADRAFT_104634 [Fusarium vanettenii 77-13-4] EEU36473.1 hypothetical protein NECHADRAFT_104634 [Fusarium vanettenii 77-13-4]	AT1G13350.1_Protein kinase superfamily protein	IPR000719_Protein kinase domain; IPR011009_Protein kinase-like domain superfamily	0.28	0	0	0	0	0	0.84	0	0	0	0	0	0	0	0	0
Am_Tr_190047	2758	XP_046125407.1_kinase-like domain-containing protein [Fusarium solani] KAH7235178.1 kinase-like domain-containing protein [Fusarium solani]	AT1G13350.1_Protein kinase superfamily protein	IPR000719_Protein kinase domain; IPR011009_Protein kinase-like domain superfamily	0.363333	0	0	0	0	0.3	0.79	0	0	0	0	0	0	0	0	0
Am_Tr_190048	259	THU42576.1_hypothetical protein C4D60_Mb00t13260 [Musa balbisiana] THU42625.1 hypothetical protein C4D60_Mb00t11460 [Musa balbisiana] THU42846.1 hypothetical protein C4D60_Mb00t14550 [Musa balbisiana] THU43229.1 hypothetical protein C4D60_Mb00t08170 [Musa balbisiana]	ATCG00270.1_photosystem II reaction center protein D, GeneName=PSBD	.	0	0	0	0	0	0	0	0	0	0	0	0	0	0	0	0
Am_Tr_190049	400	KAG9438674.1_hypothetical protein H6P81_021394 [Aristolochia fimbriata]	ATCG00270.1_photosystem II reaction center protein D, GeneName=PSBD	.	0	0	0	0	0	0	0	0	0	0	0	0	0	0	0	0
Am_Tr_190050	228	KAG6766523.1_hypothetical protein POTOM_030609 [Populus tomentosa]	AT5G18650.1_CHY-type/CTCHY-type/RING-type Zinc finger protein	.	0	0	0	0	0	0	0	0	0	0	0	0	0	0	0	0
Am_Tr_190051	1859	GAU48831.1_hypothetical protein TSUD_190610 [Trifolium subterraneum]	.	.	0	1.07667	0.363333	0.16	0	0	0	0.44	1.51	1.28	0.16	0.61	0.32	0.35	0.13	0
Am_Tr_190052	615	PNX58316.1_hypothetical protein L195_g059131, partial [Trifolium pratense]	.	.	0.443333	0	0.0766667	0	0	0.73	0.6	0	0	0	0	0.23	0	0	0	0
Am_Tr_190053	2756	KXH42320.1_dolichyl-phosphate-mannose-protein mannosyltransferase [Colletotrichum nymphaeae SA-01]	.	IPR016093_MIR motif; IPR032421_Protein O-mannosyl-transferase, C-terminal four TM domain; IPR003342_Glycosyl transferase family 39/83; IPR036300_Mir domain superfamily	0.226667	0	0.34	0	0	0.04	0.64	0	0	0	0.72	0.07	0.23	0	0	0
Am_Tr_190054	1596	KXH42320.1_dolichyl-phosphate-mannose-protein mannosyltransferase [Colletotrichum nymphaeae SA-01]	.	IPR016093_MIR motif; IPR003342_Glycosyl transferase family 39/83; IPR036300_Mir domain superfamily	0	0.02	0.316667	0	0	0	0	0	0	0.06	0.42	0	0.53	0	0	0
Am_Tr_190055	866	XP_046129540.1_RGS domain-containing protein [Fusarium solani] KAH7250516.1 RGS domain-containing protein [Fusarium solani]	.	IPR036305_RGS domain superfamily	0.48	0	0	0	0	0	1.44	0	0	0	0	0	0	0	0	0
Am_Tr_190056	448	.	.	.	0.14	0.133333	0	0.14	0	0.42	0	0.4	0	0	0	0	0	0	0.42	0
Am_Tr_190057	262	XP_001986336.1_uncharacterized protein LOC6559564 [Drosophila grimshawi] EDW01203.1 GH20579 [Drosophila grimshawi]	.	.	0	0	1.42667	0	0	0	0	0	0	0	4.28	0	0	0	0	0
Am_Tr_190058	837	XP_046132236.1_uncharacterized protein B0J15DRAFT_278672 [Fusarium solani] KAH7260140.1 hypothetical protein B0J15DRAFT_278672 [Fusarium solani]	.	.	0.473333	0	0	0	0	0.16	1.26	0	0	0	0	0	0	0	0	0
Am_Tr_190059	219	.	.	.	2.8	0	0	0	0	0	8.4	0	0	0	0	0	0	0	0	0
Am_Tr_190060	218	ORG82792.1_hypothetical protein B5016_24945, partial [Salmonella enterica subsp. enterica serovar Newport]	.	.	0	0	0	0	0	0	0	0	0	0	0	0	0	0	0	0
Am_Tr_190061	247	WP_219824299.1_hypothetical protein, partial [Enterobacter cloacae complex sp. 743-2DZ2F-22B] RYA84808.1 endonuclease, partial [Enterobacter cloacae complex sp. 743-2DZ2F-22B]	.	.	0	0	1.21333	0	0	0	0	0	0	0	3.64	0	0	0	0	0
Am_Tr_190062	1118	AFJ95731.1_NADH dehydrogenase subunit 5 [Frankliniella intonsa]	ATMG00513.1_NADH dehydrogenase 5A, GeneName=NAD5A	.	0	0	0.923333	0	0	0	0	0	0	0	2.48	0.2	0.09	0	0	0
Am_Tr_190063	2706	XP_027191497.1_phospholipase D delta-like [Cicer arietinum]	AT4G35790.2_phospholipase D delta, GeneName=PLDDELTA	IPR000008_C2 domain; IPR024632_Phospholipase D, C-terminal; IPR035892_C2 domain superfamily; IPR011402_Phospholipase D, plant; IPR025202_Phospholipase D-like domain; IPR001736_Phospholipase D/Transphosphatidylase	0	0.0566667	1.13667	0	0	0	0	0	0.17	0	2.41	0.51	0.49	0	0	0
Am_Tr_190064	1546	XP_003039219.1_uncharacterized protein NECHADRAFT_56548 [Fusarium vanettenii 77-13-4] EEU33506.1 hypothetical protein NECHADRAFT_56548 [Fusarium vanettenii 77-13-4]	.	IPR002938_FAD-binding domain; IPR036188_FAD/NAD(P)-binding domain superfamily	1.49333	0	0	0	0	0	4.48	0	0	0	0	0	0	0	0	0
Am_Tr_190065	221	XP_046139002.1_HRDC-like protein [Fusarium solani] KAH7274385.1 HRDC-like protein [Fusarium solani]	.	.	1.32333	0	0	0	0	0	3.97	0	0	0	0	0	0	0	0	0
Am_Tr_190066	807	XP_003054179.1_uncharacterized protein NECHADRAFT_74640 [Fusarium vanettenii 77-13-4] EEU48466.1 predicted protein [Fusarium vanettenii 77-13-4]	.	IPR010997_HRDC-like superfamily; IPR005574_RNA polymerase subunit Rpb4/RPC9; IPR006590_RNA polymerase Rpb4/RPC9, core	0.62	0	0	0	0	0	1.86	0	0	0	0	0	0	0	0	0
Am_Tr_190067	258	.	.	.	0	0	0.563333	0.586667	0	0	0	0	0	0	0	0	1.69	0	0	1.76
Am_Tr_190068	683	XP_020999780.1_uncharacterized protein LOC110281843 [Arachis duranensis]	.	.	0.24	0.87	0.0633333	0.07	0	0.21	0.51	1.99	0.45	0.17	0	0.19	0	0	0.21	0
Am_Tr_190069	743	MCI32287.1_hypothetical protein [Trifolium medium]	.	.	1.27	0	0	0.06	2.93	0.18	0.7	0	0	0	0	0	0	0.18	0	0
Am_Tr_190070	308	.	.	.	0	0.326667	0	0.323333	0	0	0	0.98	0	0	0	0	0	0	0	0.97
Am_Tr_190071	422	.	.	.	0.29	0	0	0.153333	0.47	0	0.4	0	0	0	0	0	0	0.46	0	0
Am_Tr_190072	223	.	.	.	0	0	0	0	0	0	0	0	0	0	0	0	0	0	0	0
Am_Tr_190073	574	.	.	.	0.09	0	0.0833333	0.18	0.27	0	0	0	0	0	0	0.25	0	0	0.27	0.27
Am_Tr_190074	1138	XP_026279892.1_uncharacterized protein LOC113207503 isoform X2 [Frankliniella occidentalis]	.	.	0	0	0.52	0	0	0	0	0	0	0	1.47	0	0.09	0	0	0
Am_Tr_190075	1817	KXH27994.1_DnaJ domain-containing protein, partial [Colletotrichum salicis]	AT5G22060.1_DNAJ homologue 2, GeneName=J2	IPR012724_Chaperone DnaJ; IPR001305_Heat shock protein DnaJ, cysteine-rich domain; IPR036410_Heat shock protein DnaJ, cysteine-rich domain superfamily; IPR001623_DnaJ domain; IPR036869_Chaperone J-domain superfamily; IPR002939_Chaperone DnaJ, C-terminal; IPR008971_HSP40/DnaJ peptide-binding	0.276667	0	0	0	0	0.06	0.77	0	0	0	0	0	0	0	0	0
Am_Tr_190076	1581	KXH27994.1_DnaJ domain-containing protein, partial [Colletotrichum salicis]	AT5G22060.1_DNAJ homologue 2, GeneName=J2	IPR001623_DnaJ domain; IPR001305_Heat shock protein DnaJ, cysteine-rich domain; IPR002939_Chaperone DnaJ, C-terminal; IPR008971_HSP40/DnaJ peptide-binding; IPR012724_Chaperone DnaJ; IPR036410_Heat shock protein DnaJ, cysteine-rich domain superfamily; IPR036869_Chaperone J-domain superfamily	0	0	1.27333	0	0	0	0	0	0	0	2.23	0.46	1.13	0	0	0
Am_Tr_190077	1019	.	.	.	0	0.656667	0.0666667	0	0	0	0	0.26	1.61	0.1	0	0	0.2	0	0	0
Am_Tr_190078	858	GAU45976.1_hypothetical protein TSUD_401160 [Trifolium subterraneum]	.	.	0	2.55333	0	0	0	0	0	0.84	4.73	2.09	0	0	0	0	0	0
Am_Tr_190079	728	PNX73016.1_polygalacturonase [Trifolium pratense]	AT3G61490.1_Pectin lyase-like superfamily protein	.	0.0633333	0.183333	0.156667	0.5	0	0.19	0	0.18	0.21	0.16	0.31	0	0.16	0.75	0.38	0.37
Am_Tr_190080	427	GAU18816.1_hypothetical protein TSUD_81050 [Trifolium subterraneum]	.	.	0	0.316667	0	0	0	0	0	0.44	0.51	0	0	0	0	0	0	0
Am_Tr_190081	440	XP_026281597.1_vacuolar protein sorting-associated protein 35 isoform X1 [Frankliniella occidentalis] KAE8750673.1 hypothetical protein FOCC_FOCC002653 [Frankliniella occidentalis]	.	.	0	0	0.12	0	0	0	0	0	0	0	0.36	0	0	0	0	0
Am_Tr_190082	382	XP_026281597.1_vacuolar protein sorting-associated protein 35 isoform X1 [Frankliniella occidentalis] KAE8750673.1 hypothetical protein FOCC_FOCC002653 [Frankliniella occidentalis]	.	.	0	0	0.496667	0	0	0	0	0	0	0	0.48	0	1.01	0	0	0
Am_Tr_190083	1395	XP_003053570.1_uncharacterized protein NECHADRAFT_74848 [Fusarium vanettenii 77-13-4] EEU47857.1 hypothetical protein NECHADRAFT_74848 [Fusarium vanettenii 77-13-4]	AT3G46230.1_heat shock protein 17.4, GeneName=HSP17.4	IPR002068_Alpha crystallin/Hsp20 domain; IPR008978_HSP20-like chaperone	0.953333	0	0	0	0	0.49	2.37	0	0	0	0	0	0	0	0	0
Am_Tr_190084	578	.	.	.	0.626667	0	0	0	1.61	0.27	0	0	0	0	0	0	0	0	0	0
Am_Tr_190085	3120	XP_026274981.1_exportin-2 [Frankliniella occidentalis]	AT2G46520.1_cellular apoptosis susceptibility protein, putative / importin-alpha re-exporter	IPR005043_Exportin-2, C-terminal; IPR016024_Armadillo-type fold; IPR013713_Exportin-2, central domain	0	0.1	1.89333	0	0	0	0	0	0.18	0.12	5.01	0.28	0.39	0	0	0
Am_Tr_190086	977	.	.	.	0.423333	0.0766667	0.293333	0.256667	0.38	0.38	0.51	0.12	0	0.11	0.32	0.24	0.32	0.38	0.26	0.13
Am_Tr_190087	994	.	.	IPR000684_RNA polymerase II, heptapeptide repeat, eukaryotic	0.756667	0	0	0	0	0.37	1.9	0	0	0	0	0	0	0	0	0
Am_Tr_190088	715	XP_029130821.1_uncharacterized protein LOC109816345 isoform X2 [Cajanus cajan]	AT5G03880.1_Thioredoxin family protein	.	0	0.886667	0.11	0.0633333	0	0	0	0.31	0.85	1.5	0	0	0.33	0.19	0	0
Am_Tr_190089	425	XP_015951451.1_uncharacterized protein LOC107476200 [Arachis duranensis]	AT5G03880.1_Thioredoxin family protein	.	0	1.06	0.253333	0.15	0	0	0	1.04	0.52	1.62	0.76	0	0	0	0	0.45
Am_Tr_190090	284	.	.	.	0	1.35333	0	0	0	0	0	2.54	1.52	0	0	0	0	0	0	0
Am_Tr_190091	3189	XP_026290530.1_guanylate kinase-associated protein mars [Frankliniella occidentalis] KAE8751298.1 hypothetical protein FOCC_FOCC001869 [Frankliniella occidentalis]	.	IPR005026_SAPAP family	0	0.0733333	1.12333	0	0	0	0	0	0.14	0.08	2.77	0.33	0.27	0	0	0
Am_Tr_190092	447	.	.	.	0	0.133333	0	0	0	0	0	0.4	0	0	0	0	0	0	0	0
Am_Tr_190093	1874	KEH23310.1_ethanolamine-phosphate cytidylyltransferase [Medicago truncatula]	AT2G38670.1_phosphorylethanolamine cytidylyltransferase 1, GeneName=PECT1	IPR004821_Cytidyltransferase-like domain	0	0.236667	0.533333	0.216667	0	0	0	0	0.71	0	1.25	0.35	0	0	0.32	0.33
Am_Tr_190094	2328	XP_004492610.1_ethanolamine-phosphate cytidylyltransferase [Cicer arietinum]	AT2G38670.1_phosphorylethanolamine cytidylyltransferase 1, GeneName=PECT1	IPR004821_Cytidyltransferase-like domain	0	0.216667	0.403333	0.0833333	0	0	0	0.11	0.54	0	0.14	0.62	0.45	0.14	0	0.11
Am_Tr_190095	1844	XP_004492610.1_ethanolamine-phosphate cytidylyltransferase [Cicer arietinum]	AT2G38670.1_phosphorylethanolamine cytidylyltransferase 1, GeneName=PECT1	IPR004821_Cytidyltransferase-like domain	0.0733333	0.0666667	0.343333	0.456667	0	0.22	0	0	0	0.2	0.61	0.23	0.19	0.88	0	0.49
Am_Tr_190096	1794	XP_004492610.1_ethanolamine-phosphate cytidylyltransferase [Cicer arietinum]	AT2G38670.1_phosphorylethanolamine cytidylyltransferase 1, GeneName=PECT1	IPR004821_Cytidyltransferase-like domain	9.84	22.9467	26.7733	27.0333	6.19	14.91	8.42	21.4	25.99	21.45	25.77	28.4	26.15	23.74	26.54	30.82
Am_Tr_190097	892	.	.	.	0	0.226667	0.59	0.11	0	0	0	0	0.39	0.29	0.63	0.59	0.55	0	0.17	0.16
Am_Tr_190098	944	.	.	.	0.283333	0.0833333	0.0766667	0.116667	0.13	0.51	0.21	0.13	0	0.12	0	0.12	0.11	0	0	0.35
Am_Tr_190099	1363	.	.	.	0.0566667	0.453333	0.3	0.543333	0	0.1	0.07	0.41	0.73	0.22	0.35	0.55	0	0.92	0.51	0.2
Am_Tr_190100	258	.	.	.	0	0	0	0.613333	0	0	0	0	0	0	0	0	0	0	1.84	0
Am_Tr_190101	696	.	.	.	1.45	0.69	0	0.53	1.01	2.03	1.31	0	1.55	0.52	0	0	0	1.19	0	0.4
Am_Tr_190102	439	.	.	.	0.39	0	0	0	0.44	0	0.73	0	0	0	0	0	0	0	0	0
Am_Tr_190103	258	.	.	.	0	2.73	0	0	0	0	0	0	6.61	1.58	0	0	0	0	0	0
Am_Tr_190104	507	.	.	.	0	1.03	0	0.223333	0	0	0	0.96	1.84	0.29	0	0	0	0.33	0.34	0
Am_Tr_190105	337	.	.	.	0	0.506667	0.246667	0	0	0	0	1.52	0	0	0	0.74	0	0	0	0
Am_Tr_190106	248	XP_004489658.1_histone-lysine N-methyltransferase SUVR3 [Cicer arietinum]	AT3G03750.2_SET domain protein 20, GeneName=SDG20	.	0	0	0.67	0.72	0	0	0	0	0	0	0	0	2.01	0	2.16	0
Am_Tr_190107	730	TKY46316.1_Histone-lysine N-methyltransferase SUVR3 [Spatholobus suberectus]	AT3G03750.2_SET domain protein 20, GeneName=SDG20	.	0.386667	0.126667	0.06	0.0666667	0.78	0.38	0	0	0.21	0.17	0	0.18	0	0	0.2	0
Am_Tr_190108	576	MCH97846.1_sucrose synthase 6-like [Trifolium medium]	AT5G37180.2_sucrose synthase 5, GeneName=SUS5	.	0	0	0.0733333	0	0	0	0	0	0	0	0.22	0	0	0	0	0
Am_Tr_190109	216	KAG4923464.1_hypothetical protein JHK87_049004 [Glycine soja]	AT1G73370.2_sucrose synthase 6, GeneName=SUS6	.	0	0	0	0	0	0	0	0	0	0	0	0	0	0	0	0
Am_Tr_190110	446	KAF1365624.1_hypothetical protein EJ07DRAFT_94512, partial [Lizonia empirigonia]	.	.	0	0.27	0	0.413333	0	0	0	0.81	0	0	0	0	0	1.24	0	0
Am_Tr_190111	2002	XP_003039978.1_uncharacterized protein NECHADRAFT_63934 [Fusarium vanettenii 77-13-4] EEU34265.1 predicted protein [Fusarium vanettenii 77-13-4]	AT1G65540.2_LETM1-like protein, GeneName=LETM2	IPR011685_LETM1-like	0.786667	0	0	0	0	0.11	2.25	0	0	0	0	0	0	0	0	0
Am_Tr_190112	688	.	.	.	0	0.13	0.0566667	0.273333	0	0	0	0.39	0	0	0	0	0.17	0	0.62	0.2
Am_Tr_190113	390	.	.	.	0	0.323333	0.473333	0.366667	0	0	0	0	0	0.97	0.46	0	0.96	0.54	0.56	0
Am_Tr_190114	2615	KYP50868.1_hypothetical protein KK1_027333 [Cajanus cajan]	AT2G01050.1_zinc ion binding / nucleic acid binding protein	IPR036875_Zinc finger, CCHC-type superfamily	0.0766667	0.03	0.07	0.78	0	0.2	0.03	0	0.09	0	0.1	0.04	0.07	0.32	1.18	0.84
Am_Tr_190115	214	.	.	.	0	0	0	0	0	0	0	0	0	0	0	0	0	0	0	0
Am_Tr_190116	329	KHN39944.1_hypothetical protein glysoja_043054 [Glycine soja]	AT2G04360.4_transmembrane protein	.	0	1.17667	0	0.28	0	0	0	1.62	1.91	0	0	0	0	0	0.84	0
Am_Tr_190117	2655	TKY60627.1_polybromo-1 protein [Spatholobus suberectus]	AT4G11560.1_bromo-adjacent homology (BAH) domain-containing protein	IPR001025_Bromo adjacent homology (BAH) domain; IPR003618_Transcription elongation factor S-II, central domain; IPR036575_Transcription elongation factor S-II, central domain superfamily	0.753333	0.273333	0.406667	0.346667	0	1.11	1.15	0.49	0.33	0	0.61	0.61	0	0.76	0	0.28
Am_Tr_190118	1284	XP_027191979.1_uncharacterized protein LOC101501082 isoform X2 [Cicer arietinum]	.	.	0.446667	0.613333	1.41333	0.3	0.61	0	0.73	0	1.13	0.71	3.58	0.66	0	0.51	0	0.39
Am_Tr_190119	2564	TKY60627.1_polybromo-1 protein [Spatholobus suberectus]	AT4G11560.1_bromo-adjacent homology (BAH) domain-containing protein	IPR036575_Transcription elongation factor S-II, central domain superfamily; IPR003618_Transcription elongation factor S-II, central domain; IPR001025_Bromo adjacent homology (BAH) domain	10.0867	11.7233	10.7567	11.4167	14.22	10.83	5.21	9.89	11.89	13.39	5.64	13.3	13.33	9.76	11.44	13.05
Am_Tr_190120	1368	XP_027191979.1_uncharacterized protein LOC101501082 isoform X2 [Cicer arietinum]	.	.	0.213333	0.3	0.09	0.243333	0	0.64	0	0.9	0	0	0	0	0.27	0	0.5	0.23
Am_Tr_190121	2070	TKY60627.1_polybromo-1 protein [Spatholobus suberectus]	AT4G11560.2_bromo-adjacent homology (BAH) domain-containing protein	IPR001025_Bromo adjacent homology (BAH) domain; IPR036575_Transcription elongation factor S-II, central domain superfamily; IPR003618_Transcription elongation factor S-II, central domain	0.04	0.113333	0.23	0.213333	0	0	0.12	0.34	0	0	0	0.47	0.22	0	0.42	0.22
Am_Tr_190122	1811	KAE8748672.1_hypothetical protein FOCC_FOCC004685 [Frankliniella occidentalis]	.	IPR002999_Tudor domain	0	0.0166667	0.383333	0	0	0	0	0	0	0.05	1.04	0.06	0.05	0	0	0
Am_Tr_190123	2495	KAE8748672.1_hypothetical protein FOCC_FOCC004685 [Frankliniella occidentalis]	AT1G55150.1_DEA(D/H)-box RNA helicase family protein, GeneName=RH20	IPR011545_DEAD/DEAH box helicase domain; IPR002999_Tudor domain; IPR027417_P-loop containing nucleoside triphosphate hydrolase	0	0	0.506667	0	0	0	0	0	0	0	1.13	0.39	0	0	0	0
Am_Tr_190124	1660	XP_035326896.1_GDP dissociation inhibitor [Colletotrichum scovillei] EXF75276.1 GDP dissociation inhibitor [Colletotrichum fioriniae PJ7] KXH37796.1 GDP dissociation inhibitor [Colletotrichum simmondsii] KXH65034.1 GDP dissociation inhibitor [Colletotrichum nymphaeae SA-01] KAF4773893.1 GDP dissociation inhibitor [Colletotrichum scovillei] KAG7048749.1 Rab GDP-dissociation inhibitor [Colletotrich…	AT5G09550.1_GDP dissociation inhibitor family protein / Rab GTPase activator family protein, GeneName=GDI	IPR000806_Rab GDI protein; IPR036188_FAD/NAD(P)-binding domain superfamily; IPR018203_GDP dissociation inhibitor	0	0.02	1.12	0	0	0	0	0	0	0.06	2.1	0.75	0.51	0	0	0
Am_Tr_190125	1660	XP_046139890.1_GDP dissociation inhibitor [Fusarium solani] KAH7275273.1 GDP dissociation inhibitor [Fusarium solani] RSL49108.1 hypothetical protein CEP54_012580 [Fusarium sp. AF-8]	AT5G09550.1_GDP dissociation inhibitor family protein / Rab GTPase activator family protein, GeneName=GDI	IPR018203_GDP dissociation inhibitor; IPR036188_FAD/NAD(P)-binding domain superfamily; IPR000806_Rab GDI protein	0.27	0	0	0	0	0.33	0.48	0	0	0	0	0	0	0	0	0
Am_Tr_190126	838	.	.	.	0	0.203333	0.18	0.103333	0	0	0	0	0.34	0.27	0.26	0.15	0.13	0	0.31	0
Am_Tr_190127	281	.	.	.	0	0.526667	0.846667	0	0	0	0	0	1.58	0	0	2.54	0	0	0	0
Am_Tr_190128	683	.	.	.	0.113333	0	1.41	0.07	0	0	0.34	0	0	0	0.34	2.13	1.76	0	0.21	0
Am_Tr_190129	256	PNX98086.1_ribonuclease H [Trifolium pratense]	.	.	1.21667	0	0	0	0	0	3.65	0	0	0	0	0	0	0	0	0
Am_Tr_190130	471	XP_002897096.1_40S ribosomal protein S15a [Phytophthora infestans T30-4] XP_008915553.1 40S ribosomal protein S15a [Phytophthora parasitica INRA-310] XP_009523228.1 hypothetical protein PHYSODRAFT_285440 [Phytophthora sojae] ETK71004.1 40S ribosomal protein S15a [Phytophthora parasitica] ETO59361.1 40S ribosomal protein S15a [Phytophthora parasitica P1976] ETP00396.1 40S ribosomal protein S15a [P…	AT3G46040.1_ribosomal protein S15A D, GeneName=RPS15AD	IPR035987_Ribosomal protein S8 superfamily; IPR000630_Ribosomal protein S8	0	0	0	0.623333	0	0	0	0	0	0	0	0	0	1.49	0.38	0
Am_Tr_190131	240	RLN46659.1_hypothetical protein BBJ29_008041, partial [Phytophthora kernoviae]	AT3G46040.1_ribosomal protein S15A D, GeneName=RPS15AD	.	0	0.72	0	0	0	0	0	0	0	2.16	0	0	0	0	0	0
Am_Tr_190132	1440	RSL72442.1_hypothetical protein CEP53_001079 [Fusarium sp. AF-6]	.	IPR010856_Protein of unknown function DUF1479	0.696667	0	0	0	0	0	2.09	0	0	0	0	0	0	0	0	0
Am_Tr_190133	447	KAG4959466.1_hypothetical protein JHK87_036099 [Glycine soja]	.	.	0.116667	0	0.13	0.273333	0	0	0.35	0	0	0	0	0.39	0	0.82	0	0
Am_Tr_190134	553	KAG4959466.1_hypothetical protein JHK87_036099 [Glycine soja]	.	.	0.253333	0.456667	0.57	1.04667	0	0.29	0.47	0.55	0.32	0.5	0.24	0	1.47	0	1.16	1.98
Am_Tr_190135	281	XP_003046228.1_uncharacterized protein NECHADRAFT_33954 [Fusarium vanettenii 77-13-4] EEU40515.1 predicted protein [Fusarium vanettenii 77-13-4]	.	.	1.24667	0	0	0	0	0	3.74	0	0	0	0	0	0	0	0	0
Am_Tr_190136	604	XP_046140529.1_peroxisomal membrane anchor protein conserved region-domain-containing protein [Fusarium solani] KAH7275912.1 peroxisomal membrane anchor protein conserved region-domain-containing protein [Fusarium solani]	.	.	0.493333	0	0	0	0	0.25	1.23	0	0	0	0	0	0	0	0	0
Am_Tr_190137	1212	XP_046137583.1_inositol phospholipid synthesis and fat-storage-inducing TM-domain-containing protein [Fusarium solani] KAH7272966.1 inositol phospholipid synthesis and fat-storage-inducing TM-domain-containing protein [Fusarium solani]	.	IPR019388_Fat storage-inducing transmembrane protein	0.843333	0	0	0	0	0.19	2.34	0	0	0	0	0	0	0	0	0
Am_Tr_190138	587	.	.	.	0.07	0.0766667	1.09	0	0	0	0.21	0	0	0.23	0	1.71	1.56	0	0	0
Am_Tr_190139	563	.	.	.	0.453333	0.656667	0.603333	0.186667	0	1.13	0.23	0.81	0.92	0.24	0	1.57	0.24	0	0.28	0.28
Am_Tr_190140	813	.	.	.	0.0533333	0.0533333	0.0466667	0.106667	0	0.16	0	0.16	0	0	0	0	0.14	0	0	0.32
Am_Tr_190141	623	.	.	.	0.08	0.0866667	0	0	0.24	0	0	0	0.26	0	0	0	0	0	0	0
Am_Tr_190142	243	.	.	.	1.68667	0	0	0	2.49	2.57	0	0	0	0	0	0	0	0	0	0
Am_Tr_190143	784	.	.	.	0.15	0.933333	0.353333	0.286667	0.17	0	0.28	1.47	0.74	0.59	0	0.48	0.58	0.17	0.52	0.17
Am_Tr_190144	1691	AFK48387.1_unknown [Medicago truncatula] RHN66597.1 hypothetical protein MtrunA17_Chr3g0092931 [Medicago truncatula]	.	.	0.06	2.04	0.0933333	0.46	0	0.13	0.05	1.51	0.92	3.69	0.05	0.12	0.11	0.26	0.6	0.52
Am_Tr_190145	1126	.	.	.	0.23	0	0	0	0.11	0.32	0.26	0	0	0	0	0	0	0	0	0
Am_Tr_190146	768	KAG4955858.1_hypothetical protein JHK85_042238 [Glycine max]	AT4G05120.1_Major facilitator superfamily protein, GeneName=FUR1	.	0.143333	0	0.05	0.0566667	0	0	0.43	0	0	0	0	0	0.15	0.17	0	0
Am_Tr_190147	617	.	.	.	0.733333	0	0	0	0	0	2.2	0	0	0	0	0	0	0	0	0
Am_Tr_190148	450	.	.	.	1.42333	0	0	0	0.84	0	3.43	0	0	0	0	0	0	0	0	0
Am_Tr_190149	437	.	.	.	0.356667	0.716667	0.293333	0.376667	1.07	0	0	1.66	0.49	0	0.88	0	0	0	0.7	0.43
Am_Tr_190150	765	KYP77328.1_Xyloglucan endotransglucosylase/hydrolase protein 22, partial [Cajanus cajan]	AT4G25810.1_xyloglucan endotransglycosylase 6, GeneName=XTR6	IPR000757_Glycoside hydrolase family 16; IPR010713_Xyloglucan endo-transglycosylase, C-terminal; IPR013320_Concanavalin A-like lectin/glucanase domain superfamily	1.44	0	0.05	0	0.88	0	3.44	0	0	0	0	0	0.15	0	0	0
Am_Tr_190151	319	.	.	.	0	0.883333	0	0	0	0	0	2.65	0	0	0	0	0	0	0	0
Am_Tr_190152	748	.	.	.	0.06	0.103333	0	0	0	0.18	0	0	0	0.31	0	0	0	0	0	0
Am_Tr_190153	376	.	.	.	0	0.386667	0	0.196667	0	0	0	1.16	0	0	0	0	0	0.59	0	0
Am_Tr_190154	248	.	.	.	0	0	0	0	0	0	0	0	0	0	0	0	0	0	0	0
Am_Tr_190155	409	.	.	.	0.283333	0	0.156667	0	0	0	0.85	0	0	0	0	0.47	0	0	0	0
Am_Tr_190156	306	.	.	.	0.706667	0	0	0	1.05	1.07	0	0	0	0	0	0	0	0	0	0
Am_Tr_190157	211	.	.	.	0	0	0	0	0	0	0	0	0	0	0	0	0	0	0	0
Am_Tr_190158	895	XP_020593379.1_transcription factor RAX3-like [Phalaenopsis equestris]	AT4G37780.1_myb domain protein 87, GeneName=MYB87	.	0.22	0.13	0.203333	0.186667	0	0.43	0.23	0.27	0	0.12	0	0.13	0.48	0	0.14	0.42
Am_Tr_190159	350	.	.	.	0.45	0.203333	0	0.23	0.73	0	0.62	0	0	0.61	0	0	0	0	0	0.69
Am_Tr_190160	220	.	.	.	0	2.24667	0	0	0	0	0	0	0	6.74	0	0	0	0	0	0
Am_Tr_190161	921	.	.	.	0.543333	0.14	0.16	0.186667	0.83	0.69	0.11	0	0.3	0.12	0.23	0.13	0.12	0.14	0.42	0
Am_Tr_190162	961	.	.	.	0	0	0	0	0	0	0	0	0	0	0	0	0	0	0	0
Am_Tr_190163	328	.	.	.	0	0.56	0	0	0	0	0	0	0.96	0.72	0	0	0	0	0	0
Am_Tr_190164	531	.	.	.	0	0	0	0	0	0	0	0	0	0	0	0	0	0	0	0
Am_Tr_190165	255	.	AT3G58180.1_ARM repeat superfamily protein	.	0	0.636667	0	0.616667	0	0	0	1.91	0	0	0	0	0	1.85	0	0
Am_Tr_190166	271	KAH8643620.1_60S ribosomal protein L12 [Alternaria alternata]	AT2G37190.1_Ribosomal protein L11 family protein	.	0	0	0	0.486667	0	0	0	0	0	0	0	0	0	0	0	1.46
Am_Tr_190167	236	XP_033655900.1_uncharacterized protein EI97DRAFT_431597 [Westerdykella ornata] KAF2278361.1 hypothetical protein EI97DRAFT_431597 [Westerdykella ornata]	AT2G37190.1_Ribosomal protein L11 family protein	.	0	2.22333	0	0	0	0	0	0	6.67	0	0	0	0	0	0	0
Am_Tr_190168	396	KAF2033230.1_hypothetical protein EK21DRAFT_58976, partial [Setomelanomma holmii]	AT5G60670.1_Ribosomal protein L11 family protein	IPR020783_Ribosomal protein L11, C-terminal; IPR036796_Ribosomal protein L11/L12, N-terminal domain superfamily; IPR036769_Ribosomal protein L11, C-terminal domain superfamily; IPR000911_Ribosomal protein L11/L12; IPR020784_Ribosomal protein L11, N-terminal	0	0	0	0.873333	0	0	0	0	0	0	0	0	0	2.62	0	0
Am_Tr_190169	665	.	.	.	0	0	0.366667	0	0	0	0	0	0	0	0	0	1.1	0	0	0
Am_Tr_190170	920	XP_046140466.1_mitochondrial 54S ribosomal protein YmL16 [Fusarium solani] KAH7275849.1 mitochondrial 54S ribosomal protein YmL16 [Fusarium solani]	AT1G05190.1_Ribosomal protein L6 family, GeneName=emb2394	IPR036789_Ribosomal protein L6, alpha-beta domain superfamily; IPR020040_Ribosomal protein L6, alpha-beta domain; IPR019906_Ribosomal protein L6, bacterial-type	1.87	0	0	0	0	0.28	5.33	0	0	0	0	0	0	0	0	0
Am_Tr_190171	1014	MCH86304.1_hypothetical protein [Trifolium medium]	.	IPR043502_DNA/RNA polymerase superfamily	0	0	0.0533333	0.0466667	0	0	0	0	0	0	0	0	0.16	0.14	0	0
Am_Tr_190172	1792	XP_045791627.1_uncharacterized protein LOC123886344 [Trifolium pratense]	.	IPR021109_Aspartic peptidase domain superfamily	0.296667	0.323333	0.13	0	0.11	0.44	0.34	0	0.93	0.04	0	0	0.39	0	0	0
Am_Tr_190173	480	XP_028230784.1_uncharacterized protein LOC114411240 [Glycine soja]	.	.	0	0	0.136667	0	0	0	0	0	0	0	0	0.34	0.07	0	0	0
Am_Tr_190174	3354	XP_028201091.1_uncharacterized protein LOC114385274 [Glycine soja]	.	IPR021109_Aspartic peptidase domain superfamily	0.233333	0.543333	0.16	0.376667	0.37	0.18	0.15	0.53	0.4	0.7	0	0.23	0.25	0.33	0.37	0.43
Am_Tr_190175	381	XP_028183905.1_uncharacterized protein LOC114370676 [Glycine soja]	.	.	0.366667	0	0	0	0	0.6	0.5	0	0	0	0	0	0	0	0	0
Am_Tr_190176	1132	PNY10481.1_hypothetical protein L195_g007059 [Trifolium pratense]	.	.	0.236667	0.403333	0.03	0.886667	0	0.63	0.08	0.2	0.46	0.55	0	0	0.09	0.21	1.5	0.95
Am_Tr_190177	297	MCI57173.1_hypothetical protein [Trifolium medium]	.	.	0	0	0	0.373333	0	0	0	0	0	0	0	0	0	0	1.12	0
Am_Tr_190178	1912	XP_045791627.1_uncharacterized protein LOC123886344 [Trifolium pratense]	.	IPR021109_Aspartic peptidase domain superfamily	0.376667	0.423333	0.213333	0.303333	0.49	0.41	0.23	0.11	0.5	0.66	0.19	0.21	0.24	0.11	0.35	0.45
Am_Tr_190179	701	KEH41558.1_hypothetical protein MTR_1g052285 [Medicago truncatula]	.	.	0	0	0.66	0	0	0	0	0	0	0	0.16	1.31	0.51	0	0	0
Am_Tr_190180	650	XP_039683800.1_uncharacterized protein LOC120576986 [Medicago truncatula]	.	.	0	0	0.52	0	0	0	0	0	0	0	0.74	0.63	0.19	0	0	0
Am_Tr_190181	595	KEH17559.1_hypothetical protein MTR_0008s0310 [Medicago truncatula]	.	.	0.0866667	0	0	0	0.26	0	0	0	0	0	0	0	0	0	0	0
Am_Tr_190182	282	KEH17079.1_hypothetical protein MTR_0046s0090 [Medicago truncatula]	.	.	0.41	0	0	0.423333	0	0	1.23	0	0	0	0	0	0	0	0	1.27
Am_Tr_190183	275	PNX94198.1_hypothetical protein L195_g017369 [Trifolium pratense]	.	.	0	0	0	0	0	0	0	0	0	0	0	0	0	0	0	0
Am_Tr_190184	360	XP_046138267.1_uncharacterized protein B0J15DRAFT_566988 [Fusarium solani] KAH7273650.1 hypothetical protein B0J15DRAFT_566988 [Fusarium solani]	.	.	0.77	0	0	0	0	0	2.31	0	0	0	0	0	0	0	0	0
Am_Tr_190185	649	XP_003053780.1_uncharacterized protein NECHADRAFT_98931 [Fusarium vanettenii 77-13-4] EEU48067.1 predicted protein [Fusarium vanettenii 77-13-4]	.	.	0.376667	0	0	0	0	0.22	0.91	0	0	0	0	0	0	0	0	0
Am_Tr_190186	642	.	.	.	0	0	0.446667	0	0	0	0	0	0	0	1.13	0.21	0	0	0	0
Am_Tr_190187	256	.	.	.	1.82667	0.76	0	0	0	0	5.48	0	2.28	0	0	0	0	0	0	0
Am_Tr_190188	510	.	.	.	0.11	0	0	0	0.33	0	0	0	0	0	0	0	0	0	0	0
Am_Tr_190189	562	.	.	.	0.246667	0.08	0	0	0	0.28	0.46	0	0	0.24	0	0	0	0	0	0
Am_Tr_190190	708	.	.	.	0	0	0.11	0.196667	0	0	0	0	0	0	0	0	0.33	0.39	0.2	0
Am_Tr_190191	1274	KHN49021.1_hypothetical protein glysoja_031232, partial [Glycine soja]	.	.	0	0.4	0.0633333	0.14	0	0	0	0.44	0.44	0.32	0.08	0	0.11	0.1	0.14	0.18
Am_Tr_190192	525	KHN49021.1_hypothetical protein glysoja_031232, partial [Glycine soja]	.	.	0	0.456667	0.24	0.56	0	0	0	1.19	0.18	0	0	0.29	0.43	0.89	0.79	0
Am_Tr_190193	232	KHN37157.1_hypothetical protein glysoja_046755, partial [Glycine soja]	.	.	0	0	3.72333	0.93	0	0	0	0	0	0	0	2.84	8.33	0	0	2.79
Am_Tr_190194	640	RHN40653.1_putative abieta-7,13-dien-18-ol hydroxylase [Medicago truncatula]	AT2G45510.1_cytochrome P450, family 704, subfamily A, polypeptide 2, GeneName=CYP704A2	IPR001128_Cytochrome P450; IPR036396_Cytochrome P450 superfamily	0.123333	0	0	0.46	0	0.37	0	0	0	0	0	0	0	0.45	0.06	0.87
Am_Tr_190195	971	KEH19025.1_cytochrome P450 family protein [Medicago truncatula]	AT2G45510.1_cytochrome P450, family 704, subfamily A, polypeptide 2, GeneName=CYP704A2	IPR001128_Cytochrome P450; IPR036396_Cytochrome P450 superfamily	0.446667	0.436667	0.89	0.973333	0.26	0.77	0.31	0.62	0.14	0.55	0.95	0.96	0.76	1.25	0.78	0.89
Am_Tr_190196	944	XP_045804323.1_cytochrome P450 704C1-like [Trifolium pratense] XP_045807398.1 cytochrome P450 704C1-like [Trifolium pratense]	AT2G45510.1_cytochrome P450, family 704, subfamily A, polypeptide 2, GeneName=CYP704A2	IPR001128_Cytochrome P450; IPR036396_Cytochrome P450 superfamily	0.266667	0	0	1.19667	0.27	0.32	0.21	0	0	0	0	0	0	1.73	0.91	0.95
Am_Tr_190197	744	RHN40653.1_putative abieta-7,13-dien-18-ol hydroxylase [Medicago truncatula]	AT2G45510.1_cytochrome P450, family 704, subfamily A, polypeptide 2, GeneName=CYP704A2	IPR001128_Cytochrome P450; IPR036396_Cytochrome P450 superfamily	0.563333	0.293333	0.653333	0.823333	0	0.76	0.93	0.61	0	0.27	0	0.75	1.21	0	1.58	0.89
Am_Tr_190198	1408	KAG8370288.1_hypothetical protein BUALT_Bualt14G0101400 [Buddleja alternifolia]	AT3G55760.1_hypothetical protein	.	0.206667	0.58	0.93	0.786667	0.13	0.37	0.12	0.85	0.89	0	1.29	0.54	0.96	1.53	0.69	0.14
Am_Tr_190199	2435	XP_004497996.1_uncharacterized protein LOC101501809 isoform X1 [Cicer arietinum]	AT3G55760.1_hypothetical protein	.	22.1533	60.92	29.5733	35.3133	18.97	31.99	15.5	57.09	59.88	65.79	27.24	31.14	30.34	36.54	29.44	39.96
Am_Tr_190200	298	.	.	.	0	0.36	0.33	1.1	0	0	0	1.08	0	0	0	0	0.99	1.08	2.22	0
Am_Tr_190201	1198	.	.	.	0.0266667	0.06	0.0533333	0.653333	0	0	0.08	0.09	0	0.09	0.16	0	0	1.17	0.3	0.49
Am_Tr_190202	757	.	.	.	0.516667	0.173333	0.55	0.413333	0.36	0.9	0.29	0.17	0.2	0.15	0.3	0.84	0.51	0.35	0.54	0.35
Am_Tr_190203	459	KEH19025.1_cytochrome P450 family protein [Medicago truncatula]	AT2G45510.1_cytochrome P450, family 704, subfamily A, polypeptide 2, GeneName=CYP704A2	.	0	1.00667	1.33333	0.343333	0	0	0	2.57	0	0.45	0.46	2.29	1.25	0	1.03	0
Am_Tr_190204	1199	KAG4400555.1_hypothetical protein GLYMA_07G083366v4 [Glycine max] KAG5022003.1 hypothetical protein JHK85_018345 [Glycine max]	AT2G45510.1_cytochrome P450, family 704, subfamily A, polypeptide 2, GeneName=CYP704A2	IPR001128_Cytochrome P450; IPR002401_Cytochrome P450, E-class, group I; IPR036396_Cytochrome P450 superfamily	0.0833333	0.13	0.873333	0	0.25	0	0	0	0	0.39	0	1.78	0.84	0	0	0
Am_Tr_190205	483	XP_027337405.1_cytochrome P450 704C1-like [Abrus precatorius]	AT2G45510.1_cytochrome P450, family 704, subfamily A, polypeptide 2, GeneName=CYP704A2	IPR001128_Cytochrome P450; IPR002403_Cytochrome P450, E-class, group IV; IPR036396_Cytochrome P450 superfamily	0	0	0	1.19667	0	0	0	0	0	0	0	0	0	2.5	0.73	0.36
Am_Tr_190206	246	.	.	.	0	0.906667	0	0	0	0	0	0	2.72	0	0	0	0	0	0	0
Am_Tr_190207	208	.	.	.	0	0	3.30667	0	0	0	0	0	0	0	4.57	5.35	0	0	0	0
Am_Tr_190208	541	MCI27578.1_hypothetical protein [Trifolium medium]	.	.	0	0	0	0.293333	0	0	0	0	0	0	0	0	0	0.29	0	0.59
Am_Tr_190209	4665	.	.	.	0	0	0.803333	0	0	0	0	0	0	0	0	0	2.41	0	0	0
Am_Tr_190210	3481	TKY65078.1_LONGIFOLIA 1 protein [Spatholobus suberectus]	AT1G74160.1_LONGIFOLIA protein, GeneName=TRM4	.	1.47333	0.573333	0.226667	0.436667	1.91	0.5	2.01	0.54	0.7	0.48	0.39	0	0.29	0.26	0.78	0.27
Am_Tr_190211	3130	TKY65078.1_LONGIFOLIA 1 protein [Spatholobus suberectus]	AT1G74160.2_LONGIFOLIA protein, GeneName=TRM4	.	0.98	0.11	0.113333	0.0533333	2.54	0	0.4	0	0.2	0.13	0.13	0.21	0	0	0	0.16
Am_Tr_190212	3423	TKY65078.1_LONGIFOLIA 1 protein [Spatholobus suberectus]	AT1G74160.1_LONGIFOLIA protein, GeneName=TRM4	IPR025486_Domain of unknown function DUF4378	0.346667	0.463333	3.74	0	0	0	1.04	0	1.39	0	4.42	3.93	2.87	0	0	0
Am_Tr_190213	419	.	.	.	0	0	1.11333	0	0	0	0	0	0	0	0.39	0.89	2.06	0	0	0
Am_Tr_190214	245	XP_004499469.1_protein LONGIFOLIA 1-like [Cicer arietinum]	AT1G74160.1_LONGIFOLIA protein, GeneName=TRM4	.	1.6	0	0	0	4.8	0	0	0	0	0	0	0	0	0	0	0
Am_Tr_190215	312	.	.	.	0	0	0.286667	0.96	0	0	0	0	0	0	0	0	0.86	0.94	1.94	0
Am_Tr_190216	545	.	.	.	0.196667	0.0933333	0	0	0.59	0	0	0.28	0	0	0	0	0	0	0	0
Am_Tr_190217	426	.	.	.	0	0.443333	0	0	0	0	0	1.33	0	0	0	0	0	0	0	0
Am_Tr_190218	409	.	.	.	0	0	0	0.33	0	0	0	0	0	0	0	0	0	0.49	0.5	0
Am_Tr_190219	548	.	.	.	0.0966667	0.0933333	0.0833333	0	0	0.29	0	0.28	0	0	0	0	0.25	0	0	0
Am_Tr_190220	725	.	.	.	0.126667	0	0	0	0	0.38	0	0	0	0	0	0	0	0	0	0
Am_Tr_190221	1349	.	.	.	0.0566667	0.106667	0	0.88	0	0.17	0	0.08	0.09	0.15	0	0	0	0.93	0.95	0.76
Am_Tr_190222	875	.	.	.	0	0	0.0866667	0	0	0	0	0	0	0	0	0.14	0.12	0	0	0
Am_Tr_190223	216	.	.	.	0	0	0	0	0	0	0	0	0	0	0	0	0	0	0	0
Am_Tr_190224	281	.	.	.	0	0	0	0.87	0	0	0	0	0	0	0	0	0	2.61	0	0
Am_Tr_190225	1141	TXG48346.1_hypothetical protein EZV62_027640 [Acer yangbiense]	.	IPR036875_Zinc finger, CCHC-type superfamily	0.236667	0.206667	0.153333	0.0366667	0	0.63	0.08	0.3	0.23	0.09	0	0.2	0.26	0	0.11	0
Am_Tr_190226	249	KAE9021216.1_hypothetical protein PR002_g12320 [Phytophthora rubi] KAE9207279.1 hypothetical protein PF004_g17073 [Phytophthora fragariae] KAE9336481.1 hypothetical protein PR003_g12497 [Phytophthora rubi]	.	.	1.46	0	0	0	0	2.3	2.08	0	0	0	0	0	0	0	0	0
Am_Tr_190227	935	.	.	.	0.09	0	0.0833333	0.273333	0	0.27	0	0	0	0	0	0.25	0	0	0.82	0
Am_Tr_190228	478	.	.	.	0.25	0.683333	0.46	1.61333	0	0.75	0	0	2.05	0	0	1.38	0	0	4.84	0
Am_Tr_190229	464	.	.	.	0.216667	0	0	0	0	0	0.65	0	0	0	0	0	0	0	0	0
Am_Tr_190230	379	.	.	.	0.336667	0	0	0	0	0	1.01	0	0	0	0	0	0	0	0	0
Am_Tr_190231	1271	.	.	.	0	0.336667	0.106667	0.06	0	0	0	0.53	0.4	0.08	0.15	0.09	0.08	0.09	0	0.09
Am_Tr_190232	304	KAG5017533.1_hypothetical protein JHK85_023669 [Glycine max]	.	.	0.63	0	0	0	0	0	1.89	0	0	0	0	0	0	0	0	0
Am_Tr_190233	337	.	.	.	0	0.296667	0	0.51	0	0	0	0	0.89	0	0	0	0	1.53	0	0
Am_Tr_190234	263	.	.	.	0	0	0	0	0	0	0	0	0	0	0	0	0	0	0	0
Am_Tr_190235	3589	XP_014626203.1_uncharacterized mitochondrial protein AtMg00810-like [Glycine max] XP_028215242.1 uncharacterized protein LOC114397394 [Glycine soja]	AT4G23160.3_cysteine-rich RECEPTOR-like kinase, GeneName=CRK8	IPR007750_Protein of unknown function DUF674	0.34	0.07	0.0666667	0.25	0.57	0.43	0.02	0.06	0.15	0	0.07	0.13	0	0.11	0.64	0
Am_Tr_190236	384	.	.	.	0.193333	0	0	0.186667	0.58	0	0	0	0	0	0	0	0	0.56	0	0
Am_Tr_190237	351	.	.	.	0	0	0	0	0	0	0	0	0	0	0	0	0	0	0	0
Am_Tr_190238	541	.	.	.	0	0	0	0.293333	0	0	0	0	0	0	0	0	0	0	0	0.88
Am_Tr_190239	430	.	.	.	0.153333	0.146667	0	0.296667	0	0.46	0	0.44	0	0	0	0	0	0.89	0	0
Am_Tr_190240	249	.	.	.	0	0	0.656667	0	0	0	0	0	0	0	0	0	1.97	0	0	0
Am_Tr_190241	344	.	.	.	0	0	0.436667	0	0	0	0	0	0	0	0	0	1.31	0	0	0
Am_Tr_190242	636	.	.	.	0	0	0.836667	0	0	0	0	0	0	0	2.09	0.22	0.2	0	0	0
Am_Tr_190243	261	XP_025667848.1_zinc finger-containing ubiquitin peptidase 1 isoform X3 [Arachis hypogaea]	AT5G24680.1_Peptidase C78, ubiquitin fold modifier-specific peptidase 1/ 2	.	0	1.01	0	0.56	0	0	0	0	0	3.03	0	0	0	0	0	1.68
Am_Tr_190244	308	.	.	.	0.35	0.286667	0	0.336667	0	1.05	0	0	0	0.86	0	0	0	0	1.01	0
Am_Tr_190245	262	.	.	.	0	0	0	0	0	0	0	0	0	0	0	0	0	0	0	0
Am_Tr_190246	206	.	.	.	0	0	0	0	0	0	0	0	0	0	0	0	0	0	0	0
Am_Tr_190247	238	.	.	.	0	0	0	0	0	0	0	0	0	0	0	0	0	0	0	0
Am_Tr_190248	840	XP_026287822.1_protein disabled isoform X4 [Frankliniella occidentalis]	.	.	0	0	0.596667	0	0	0	0	0	0	0	1.79	0	0	0	0	0
Am_Tr_190249	1413	XP_017227899.1_PREDICTED: uncharacterized protein LOC108203467 [Daucus carota subsp. sativus]	.	.	1.15333	0.403333	0.9	0.693333	1.13	0.16	2.17	0.32	0.61	0.28	0.4	1.29	1.01	0.78	0.41	0.89
Am_Tr_190250	516	XP_030478287.1_uncharacterized protein LOC115695357 [Cannabis sativa]	.	.	1.66	1.06667	1.14	0.746667	3.58	0.33	1.07	2.49	0.71	0	0.53	1.51	1.38	0.64	0.65	0.95
Am_Tr_190251	350	MCI03960.1_hypothetical protein [Trifolium medium]	.	.	0.483333	0	0.43	0	1.45	0	0	0	0	0	0	0.67	0.62	0	0	0
Am_Tr_190252	367	.	.	.	0	0	1.22	0	0	0	0	0	0	0	3.66	0	0	0	0	0
Am_Tr_190253	900	KAE8745000.1_hypothetical protein FOCC_FOCC008412 [Frankliniella occidentalis]	.	.	0	0	0.546667	0	0	0	0	0	0	0	1.64	0	0	0	0	0
Am_Tr_190254	827	KAE8745000.1_hypothetical protein FOCC_FOCC008412 [Frankliniella occidentalis]	.	.	0	0.0466667	0.216667	0	0	0	0	0	0	0.14	0.65	0	0	0	0	0
Am_Tr_190255	621	EMS60031.1_Long-chain-fatty-acid--CoA ligase FadD15 [Triticum urartu]	AT3G23790.1_AMP-dependent synthetase and ligase family protein, GeneName=AAE16	.	0.0266667	0.00666667	0.0966667	0.23	0	0	0.08	0.02	0	0	0.29	0	0	0.57	0	0.12
Am_Tr_190256	1392	MCI09692.1_putative acyl-activating enzyme 16 chloroplastic [Trifolium medium]	AT3G23790.1_AMP-dependent synthetase and ligase family protein, GeneName=AAE16	.	0.0333333	1.34	0.416667	0.306667	0	0	0.1	1.65	1.87	0.5	0.1	0.46	0.69	0.13	0.67	0.12
Am_Tr_190257	256	XP_045814884.1_probable acyl-activating enzyme 16, chloroplastic isoform X2 [Trifolium pratense] XP_045814885.1 probable acyl-activating enzyme 16, chloroplastic isoform X2 [Trifolium pratense]	AT3G23790.1_AMP-dependent synthetase and ligase family protein, GeneName=AAE16	.	0	2.06333	0	0	0	0	0	0	4.56	1.63	0	0	0	0	0	0
Am_Tr_190258	982	XP_045813034.1_probable acyl-activating enzyme 16, chloroplastic isoform X3 [Trifolium pratense] XP_045813035.1 probable acyl-activating enzyme 16, chloroplastic isoform X3 [Trifolium pratense] XP_045813036.1 probable acyl-activating enzyme 16, chloroplastic isoform X3 [Trifolium pratense]	AT3G23790.1_AMP-dependent synthetase and ligase family protein, GeneName=AAE16	.	0.0833333	0.0933333	0.04	0.21	0.25	0	0	0	0.28	0	0	0.12	0	0.12	0.51	0
Am_Tr_190259	398	XP_045814882.1_probable acyl-activating enzyme 16, chloroplastic isoform X2 [Trifolium pratense]	AT4G14070.1_acyl-activating enzyme 15, GeneName=AAE15	.	0	0	0.146667	0	0	0	0	0	0	0	0.44	0	0	0	0	0
Am_Tr_190260	456	PNY01183.1_putative acyl-activating enzyme chloroplastic-like [Trifolium pratense]	AT3G23790.1_AMP-dependent synthetase and ligase family protein, GeneName=AAE16	IPR000873_AMP-dependent synthetase/ligase	0	0.13	0	0.263333	0	0	0	0.39	0	0	0	0	0	0.79	0	0
Am_Tr_190261	298	PNX93049.1_putative acyl-activating enzyme chloroplastic-like [Trifolium pratense]	AT3G23790.1_AMP-dependent synthetase and ligase family protein, GeneName=AAE16	.	0	0	0	0.37	0	0	0	0	0	0	0	0	0	0	1.11	0
Am_Tr_190262	356	XP_027190749.1_probable acyl-activating enzyme 16, chloroplastic isoform X3 [Cicer arietinum]	AT3G23790.1_AMP-dependent synthetase and ligase family protein, GeneName=AAE16	.	0.196667	0.256667	0	0	0	0	0.59	0	0.77	0	0	0	0	0	0	0
Am_Tr_190263	788	EGT57061.1_CBN-ASP-6 protein [Caenorhabditis brenneri]	.	IPR033121_Peptidase family A1 domain; IPR001461_Aspartic peptidase A1 family; IPR021109_Aspartic peptidase domain superfamily	0.94	0	0	0	0	2.55	0.27	0	0	0	0	0	0	0	0	0
Am_Tr_190264	532	PIC22610.1_hypothetical protein B9Z55_016599 [Caenorhabditis nigoni]	.	IPR033121_Peptidase family A1 domain; IPR001461_Aspartic peptidase A1 family; IPR021109_Aspartic peptidase domain superfamily	0.62	0	0	0	0	1.86	0	0	0	0	0	0	0	0	0	0
Am_Tr_190265	388	PIC22610.1_hypothetical protein B9Z55_016599 [Caenorhabditis nigoni]	.	IPR021109_Aspartic peptidase domain superfamily; IPR001461_Aspartic peptidase A1 family; IPR033121_Peptidase family A1 domain	1.15	0	0	0	0	3.45	0	0	0	0	0	0	0	0	0	0
Am_Tr_190266	254	TMW68073.1_hypothetical protein Poli38472_007745 [Pythium oligandrum]	.	.	0	0	0	0	0	0	0	0	0	0	0	0	0	0	0	0
Am_Tr_190267	508	XP_007840857.1_Protein SnodProt1 [Pestalotiopsis fici W106-1] ETS74219.1 Protein SnodProt1 [Pestalotiopsis fici W106-1]	.	.	1.21333	0	0	0	0	2.35	1.29	0	0	0	0	0	0	0	0	0
Am_Tr_190268	518	XP_007840857.1_Protein SnodProt1 [Pestalotiopsis fici W106-1] ETS74219.1 Protein SnodProt1 [Pestalotiopsis fici W106-1]	.	.	0.313333	0	0	0	0	0.32	0.62	0	0	0	0	0	0	0	0	0
Am_Tr_190269	517	RSM04388.1_hypothetical protein CDV31_010090 [Fusarium ambrosium]	.	.	0.8	0	0	0	0	0	2.4	0	0	0	0	0	0	0	0	0
Am_Tr_190270	677	.	.	.	0.393333	0	0	0	0.63	0.21	0.34	0	0	0	0	0	0	0	0	0
Am_Tr_190271	256	KAF2690050.1_DEAD-domain-containing protein [Lentithecium fluviatile CBS 122367]	AT5G63630.1_P-loop containing nucleoside triphosphate hydrolases superfamily protein	.	0	0	1.20667	0	0	0	0	0	0	0	0	3.62	0	0	0	0
Am_Tr_190272	727	XP_046139924.1_P-loop containing nucleoside triphosphate hydrolase protein [Fusarium solani] KAH7275307.1 P-loop containing nucleoside triphosphate hydrolase protein [Fusarium solani]	AT5G08610.1_P-loop containing nucleoside triphosphate hydrolases superfamily protein, GeneName=PDE340	IPR011545_DEAD/DEAH box helicase domain; IPR027417_P-loop containing nucleoside triphosphate hydrolase	0.793333	0	0	0	0.38	0	2	0	0	0	0	0	0	0	0	0
Am_Tr_190273	807	XP_046129513.1_uncharacterized protein B0J15DRAFT_467364 [Fusarium solani] KAH7250489.1 hypothetical protein B0J15DRAFT_467364 [Fusarium solani]	.	.	0.576667	0	0	0	0	0	1.73	0	0	0	0	0	0	0	0	0
Am_Tr_190274	657	XP_026283145.1_microsomal glutathione S-transferase 1-like isoform X2 [Frankliniella occidentalis]	.	IPR001129_Membrane-associated, eicosanoid/glutathione metabolism (MAPEG) protein; IPR023352_Membrane associated eicosanoid/glutathione metabolism-like domain superfamily	0	0	0.293333	0	0	0	0	0	0	0	0	0	0.88	0	0	0
Am_Tr_190275	701	XP_034233308.1_microsomal glutathione S-transferase 1 isoform X1 [Thrips palmi]	.	IPR001129_Membrane-associated, eicosanoid/glutathione metabolism (MAPEG) protein; IPR023352_Membrane associated eicosanoid/glutathione metabolism-like domain superfamily	0	0	0.356667	0	0	0	0	0	0	0	0	0	1.07	0	0	0
Am_Tr_190276	229	.	.	.	1.11333	0	1.01333	0	3.34	0	0	0	0	0	0	3.04	0	0	0	0
Am_Tr_190277	204	.	.	.	0	0	0	0	0	0	0	0	0	0	0	0	0	0	0	0
Am_Tr_190278	354	PNX97653.1_transaldolase, partial [Trifolium pratense]	AT5G13420.1_Aldolase-type TIM barrel family protein, GeneName=TRA2	.	0	0	0.76	0	0	0	0	0	0	0	2.28	0	0	0	0	0
Am_Tr_190279	256	XP_046134165.1_PXA domain-containing protein [Fusarium solani] KAH7266366.1 PXA domain-containing protein [Fusarium solani]	.	.	0.61	0	0	0	0	0	1.83	0	0	0	0	0	0	0	0	0
Am_Tr_190280	426	.	.	.	0.13	0	0	0.15	0	0	0.39	0	0	0	0	0	0	0.45	0	0
Am_Tr_190281	769	.	.	.	0.386667	0.113333	0.103333	0.113333	0.35	0.53	0.28	0	0.19	0.15	0	0.16	0.15	0.17	0	0.17
Am_Tr_190282	901	.	.	.	0.473333	0.303333	0.166667	0.426667	0.43	0.42	0.57	0.27	0.15	0.49	0.12	0.26	0.12	0.28	0.86	0.14
Am_Tr_190283	414	.	.	.	0	0.156667	0	0	0	0	0	0.47	0	0	0	0	0	0	0	0
Am_Tr_190284	213	.	.	.	0	0	0	0	0	0	0	0	0	0	0	0	0	0	0	0
Am_Tr_190285	285	.	.	.	1.68	0	0	0	1.32	1.36	2.36	0	0	0	0	0	0	0	0	0
Am_Tr_190286	331	.	.	.	0.483333	0	0	0	0	0	1.45	0	0	0	0	0	0	0	0	0
Am_Tr_190287	238	.	.	.	0	0	0.813333	0	0	0	0	0	0	0	0	0	2.44	0	0	0
Am_Tr_190288	529	KAE8747879.1_hypothetical protein FOCC_FOCC005492 [Frankliniella occidentalis]	.	.	0	0	0.34	0	0	0	0	0	0	0	1.02	0	0	0	0	0
Am_Tr_190289	1431	KYP72596.1_Putative ribonuclease H protein At1g65750 family [Cajanus cajan]	ATMG01250.1_RNA-directed DNA polymerase (reverse transcriptase), GeneName=ORF102	IPR000477_Reverse transcriptase domain	0.0266667	0.193333	0	0.21	0	0.08	0	0.15	0.43	0	0	0	0	0.39	0.24	0
Am_Tr_190290	248	.	.	.	0	0	0	0	0	0	0	0	0	0	0	0	0	0	0	0
Am_Tr_190291	634	XP_013457154.1_uncharacterized protein LOC25493255 [Medicago truncatula] KEH31185.1 transmembrane protein, putative [Medicago truncatula] RHN62582.1 hypothetical protein MtrunA17_Chr4g0049001 [Medicago truncatula]	AT4G21310.1_transmembrane protein, putative (DUF1218)	IPR009606_Modifying wall lignin-1/2	0	0	0	0	0	0	0	0	0	0	0	0	0	0	0	0
Am_Tr_190292	620	TKY59388.1_hypothetical protein E2542_SST16477 [Spatholobus suberectus]	AT4G21310.1_transmembrane protein, putative (DUF1218)	IPR009606_Modifying wall lignin-1/2	0.08	0	2.89667	0.316667	0.24	0	0	0	0	0	7.12	1.57	0	0.71	0.24	0
Am_Tr_190293	3641	XP_026285105.1_protein mini spindles [Frankliniella occidentalis] XP_026285106.1 protein mini spindles [Frankliniella occidentalis] KAE8740038.1 hypothetical protein FOCC_FOCC014444 [Frankliniella occidentalis]	.	IPR016024_Armadillo-type fold; IPR034085_TOG domain; IPR024395_CLASP N-terminal domain	0	0.0333333	1.45667	0	0	0	0	0	0.03	0.07	4.13	0.05	0.19	0	0	0
Am_Tr_190294	359	.	.	.	0	0	0	0	0	0	0	0	0	0	0	0	0	0	0	0
Am_Tr_190295	836	MCI24018.1_hypothetical protein [Trifolium medium]	.	.	0	0.436667	0	0.256667	0	0	0	0.9	0	0.41	0	0	0	0.31	0	0.46
Am_Tr_190296	241	.	.	.	0	0	0	0	0	0	0	0	0	0	0	0	0	0	0	0
Am_Tr_190297	533	RYN49633.1_hypothetical protein AA0118_g11335 [Alternaria tenuissima] RYN70919.1 hypothetical protein AA0117_g10024 [Alternaria alternata]	.	.	0	0	0	0.403333	0	0	0	0	0	0	0	0	0	0.6	0.31	0.3
Am_Tr_190298	254	XP_033460596.1_family A G protein-coupled receptor-like protein [Dissoconium aciculare CBS 342.82] KAF1823560.1 family A G protein-coupled receptor-like protein [Dissoconium aciculare CBS 342.82]	.	.	0	1.77	0	0	0	0	0	1.94	0	3.37	0	0	0	0	0	0
Am_Tr_190299	246	KAF2681323.1_family A G protein-coupled receptor-like protein [Lentithecium fluviatile CBS 122367]	.	.	0	1.28667	0	0	0	0	0	0	0	3.86	0	0	0	0	0	0
Am_Tr_190300	822	XP_046132121.1_ribosomal protein S10 domain-containing protein [Fusarium solani] KAH7260025.1 ribosomal protein S10 domain-containing protein [Fusarium solani]	.	IPR027486_Ribosomal protein S10 domain; IPR001848_Ribosomal protein S10; IPR036838_Ribosomal protein S10 domain superfamily	0.58	0	0	0	0.16	0.16	1.42	0	0	0	0	0	0	0	0	0
Am_Tr_190301	3626	XP_026286062.1_uncharacterized protein LOC113211791 [Frankliniella occidentalis]	.	IPR000198_Rho GTPase-activating protein domain; IPR008936_Rho GTPase activation protein	0	0.0366667	0.883333	0	0	0	0	0	0.06	0.05	2.06	0.21	0.38	0	0	0
Am_Tr_190302	818	KAG8308252.1_hypothetical protein J6590_002337 [Homalodisca vitripennis]	.	IPR036236_Zinc finger C2H2 superfamily; IPR013087_Zinc finger C2H2-type	0	0	0.753333	0	0	0	0	0	0	0	1.99	0	0.27	0	0	0
Am_Tr_190303	1480	KAE8747853.1_hypothetical protein FOCC_FOCC005465 [Frankliniella occidentalis]	.	IPR000210_BTB/POZ domain; IPR011333_SKP1/BTB/POZ domain superfamily	0	0	0.44	0	0	0	0	0	0	0	0.87	0	0.45	0	0	0
Am_Tr_190304	705	.	.	.	0	0	0.27	0	0	0	0	0	0	0	0.81	0	0	0	0	0
Am_Tr_190305	1381	KAE8747853.1_hypothetical protein FOCC_FOCC005465 [Frankliniella occidentalis]	.	IPR000210_BTB/POZ domain; IPR013087_Zinc finger C2H2-type; IPR036236_Zinc finger C2H2 superfamily; IPR011333_SKP1/BTB/POZ domain superfamily	0	0.03	0.466667	0	0	0	0	0	0.09	0	1.32	0.08	0	0	0	0
Am_Tr_190306	1005	.	.	.	0	0	1.09333	0	0	0	0	0	0	0	2.84	0.23	0.21	0	0	0
Am_Tr_190307	748	.	.	.	0	0	0.916667	0	0	0	0	0	0	0	2.1	0.34	0.31	0	0	0
Am_Tr_190308	349	.	.	.	0.66	1.69	0.63	1.19333	0.73	0	1.25	1.39	2.45	1.23	0.59	0.67	0.63	0.7	2.88	0
Am_Tr_190309	535	.	.	.	0	0.0866667	0	0.1	0	0	0	0	0	0.26	0	0	0	0.3	0	0
Am_Tr_190310	461	.	.	.	0	0	0.236667	0	0	0	0	0	0	0	0	0.37	0.34	0	0	0
Am_Tr_190311	722	.	.	.	0.0633333	0.126667	0.21	0.19	0	0.19	0	0	0.21	0.17	0.47	0	0.16	0.38	0.19	0
Am_Tr_190312	684	.	.	.	0.253333	0.21	0.3	0.276667	0	0.42	0.34	0.4	0.23	0	0.51	0.39	0	0.2	0.63	0
Am_Tr_190313	1444	XP_009527353.1_hypothetical protein PHYSODRAFT_559240 [Phytophthora sojae] EGZ18295.1 hypothetical protein PHYSODRAFT_559240 [Phytophthora sojae]	AT1G20630.1_catalase 1, GeneName=CAT1	IPR018028_Catalase, mono-functional, haem-containing; IPR010582_Catalase immune-responsive domain; IPR011614_Catalase core domain; IPR020835_Catalase superfamily	0.55	0	0	0	0.24	1.02	0.39	0	0	0	0	0	0	0	0	0
Am_Tr_190314	1092	KAG6617295.1_Catalase [Phytophthora cinnamomi]	AT1G20630.1_catalase 1, GeneName=CAT1	.	0.243333	0	0	0	0.21	0	0.52	0	0	0	0	0	0	0	0	0
Am_Tr_190315	809	XP_033457664.1_uncharacterized protein K489DRAFT_382554 [Dissoconium aciculare CBS 342.82] KAF1820628.1 hypothetical protein K489DRAFT_382554 [Dissoconium aciculare CBS 342.82]	.	.	0	0.696667	0	0	0	0	0	0.31	1.07	0.71	0	0	0	0	0	0
Am_Tr_190316	546	XP_033457664.1_uncharacterized protein K489DRAFT_382554 [Dissoconium aciculare CBS 342.82] KAF1820628.1 hypothetical protein K489DRAFT_382554 [Dissoconium aciculare CBS 342.82]	.	.	0	0.196667	0	0.1	0	0	0	0.59	0	0	0	0	0	0	0.3	0
Am_Tr_190317	934	XP_033457664.1_uncharacterized protein K489DRAFT_382554 [Dissoconium aciculare CBS 342.82] KAF1820628.1 hypothetical protein K489DRAFT_382554 [Dissoconium aciculare CBS 342.82]	.	.	0	0.83	0.0433333	0	0	0	0	1.15	0.29	1.05	0	0.13	0	0	0	0
Am_Tr_190318	823	KAH7088449.1_pectate lyase precursor [Paraphoma chrysanthemicola]	.	IPR004898_Pectate lyase PlyH/PlyE-like; IPR011050_Pectin lyase fold/virulence factor	0.213333	0	0	0	0.64	0	0	0	0	0	0	0	0	0	0	0
Am_Tr_190319	750	KAH7088449.1_pectate lyase precursor [Paraphoma chrysanthemicola]	.	IPR011050_Pectin lyase fold/virulence factor; IPR004898_Pectate lyase PlyH/PlyE-like	0	0.123333	0.1	0.776667	0	0	0	0.17	0.2	0	0.3	0	0	1.97	0	0.36
Am_Tr_190320	1363	GAU20595.1_hypothetical protein TSUD_297680 [Trifolium subterraneum]	.	.	0	0.03	1.61	0	0	0	0	0	0.09	0	1.32	2.37	1.14	0	0	0
Am_Tr_190321	276	.	.	.	0.986667	0	0	0	2.96	0	0	0	0	0	0	0	0	0	0	0
Am_Tr_190322	229	.	.	.	0	0	0	1.99667	0	0	0	0	0	0	0	0	0	3.01	0	2.98
Am_Tr_190323	1182	.	.	.	0.173333	0.64	0.15	0.266667	0.1	0.1	0.32	0.58	0.65	0.69	0	0.37	0.08	0.2	0.2	0.4
Am_Tr_190324	1528	.	.	.	0.32	0	0.0233333	0.05	0.15	0.81	0	0	0	0	0	0.07	0	0	0.15	0
Am_Tr_190325	1019	.	.	.	0	0.436667	0.103333	0.243333	0	0	0	0.69	0.52	0.1	0	0	0.31	0.12	0.37	0.24
Am_Tr_190326	311	.	.	.	0	0.376667	0.29	0	0	0	0	0	1.13	0	0	0	0.87	0	0	0
Am_Tr_190327	786	RYR79687.1_hypothetical protein Ahy_A01g004503 [Arachis hypogaea]	AT1G40390.1_DNAse I-like superfamily protein	.	0.39	0	0.386667	0	0	0.34	0.83	0	0	0	0.7	0.32	0.14	0	0	0
Am_Tr_190328	1808	XP_020975770.1_uncharacterized protein LOC110270496 [Arachis ipaensis]	.	.	0	0.553333	0.0866667	0.02	0	0	0	0.29	1.05	0.32	0	0.11	0.15	0	0.06	0
Am_Tr_190329	1107	.	.	.	0.29	0	0	0	0	0	0.87	0	0	0	0	0	0	0	0	0
Am_Tr_190330	791	CRK28634.1_hypothetical protein BN1708_015282 [Verticillium longisporum]	AT3G09840.1_cell division cycle 48, GeneName=CDC48	IPR027417_P-loop containing nucleoside triphosphate hydrolase; IPR003959_ATPase, AAA-type, core; IPR041569_AAA ATPase, AAA+ lid domain; IPR003593_AAA+ ATPase domain	0.546667	0	0	0	0	0.68	0.96	0	0	0	0	0	0	0	0	0
Am_Tr_190331	844	XP_034237827.1_transitional endoplasmic reticulum ATPase TER94 isoform X1 [Thrips palmi]	AT3G53230.1_ATPase, AAA-type, CDC48 protein, GeneName=AtCDC48B	IPR003593_AAA+ ATPase domain; IPR003959_ATPase, AAA-type, core; IPR027417_P-loop containing nucleoside triphosphate hydrolase; IPR004201_CDC48, domain 2; IPR029067_CDC48 domain 2-like superfamily	0	0	0.696667	0	0	0	0	0	0	0	0	0	2.09	0	0	0
Am_Tr_190332	573	.	.	.	0.363333	0.36	0	0.176667	1.09	0	0	0.78	0.3	0	0	0	0	0.53	0	0
Am_Tr_190333	214	.	.	.	0	0	0	0	0	0	0	0	0	0	0	0	0	0	0	0
Am_Tr_190334	732	.	.	.	0.126667	0.49	0.22	0.373333	0.38	0	0	0	0.82	0.65	0.31	0.35	0	0.56	0	0.56
Am_Tr_190335	476	.	.	.	0	0	0	0	0	0	0	0	0	0	0	0	0	0	0	0
Am_Tr_190336	227	.	.	.	0	0	0	0	0	0	0	0	0	0	0	0	0	0	0	0
Am_Tr_190337	359	.	.	.	0	0.41	0	0	0	0	0	0.65	0	0.58	0	0	0	0	0	0
Am_Tr_190338	309	KAG6573087.1_Major pollen allergen Ole e 6, partial [Cucurbita argyrosperma subsp. sororia]	.	.	0	0	0.69	0	0	0	0	0	0	0	2.07	0	0	0	0	0
Am_Tr_190339	318	KAG6573087.1_Major pollen allergen Ole e 6, partial [Cucurbita argyrosperma subsp. sororia]	.	.	0	0	0.623333	0	0	0	0	0	0	0	1.87	0	0	0	0	0
Am_Tr_190340	416	.	.	.	0.136667	0.656667	0.3	0.163333	0	0	0.41	0.47	1.08	0.42	0	0.9	0	0	0.49	0
Am_Tr_190341	414	.	.	.	0	0	1.20333	0	0	0	0	0	0	0	3.61	0	0	0	0	0
Am_Tr_190342	694	XP_033463816.1_uncharacterized protein K489DRAFT_312469 [Dissoconium aciculare CBS 342.82] KAF1826780.1 hypothetical protein K489DRAFT_312469 [Dissoconium aciculare CBS 342.82]	.	.	0	0.313333	0	0.0666667	0	0	0	0.19	0.22	0.53	0	0	0	0	0.2	0
Am_Tr_190343	1090	XP_033463816.1_uncharacterized protein K489DRAFT_312469 [Dissoconium aciculare CBS 342.82] KAF1826780.1 hypothetical protein K489DRAFT_312469 [Dissoconium aciculare CBS 342.82]	.	.	0	0.77	0	0	0	0	0	1.81	0.12	0.38	0	0	0	0	0	0
Am_Tr_190344	579	XP_033463816.1_uncharacterized protein K489DRAFT_312469 [Dissoconium aciculare CBS 342.82] KAF1826780.1 hypothetical protein K489DRAFT_312469 [Dissoconium aciculare CBS 342.82]	.	.	0	0.426667	0	0	0	0	0	1.28	0	0	0	0	0	0	0	0
Am_Tr_190345	1574	XP_026273954.1_uncharacterized protein LOC113203459 [Frankliniella occidentalis] KAE8750909.1 hypothetical protein FOCC_FOCC002337 [Frankliniella occidentalis]	.	.	0	0.0833333	1.11667	0	0	0	0	0	0	0.25	2.59	0.4	0.36	0	0	0
Am_Tr_190346	313	.	.	.	1.06667	0	0	0	1.48	0	1.72	0	0	0	0	0	0	0	0	0
Am_Tr_190347	918	GAU44417.1_hypothetical protein TSUD_100640 [Trifolium subterraneum]	.	.	0.443333	0	0	0.0466667	1.11	0	0.22	0	0	0	0	0	0	0.14	0	0
Am_Tr_190348	483	.	.	.	0.55	0	0	0	1.28	0.37	0	0	0	0	0	0	0	0	0	0
Am_Tr_190349	700	XP_004497525.1_uncharacterized protein LOC101510262 [Cicer arietinum]	.	.	0.2	0.243333	0.17	0.0866667	0	0.6	0	0.38	0	0.35	0	0	0.51	0	0.2	0.06
Am_Tr_190350	870	XP_045826029.1_OVARIAN TUMOR DOMAIN-containing deubiquitinating enzyme 9-like isoform X11 [Trifolium pratense]	AT5G03330.3_Cysteine proteinases superfamily protein	.	0.08	0	0.04	0.33	0	0	0.24	0	0	0	0.12	0	0	0.45	0	0.54
Am_Tr_190351	432	.	.	.	0.456667	1.83667	0.913333	1.03667	0.91	0.46	0	0.86	3.49	1.16	0	0.42	2.32	1.32	1.35	0.44
Am_Tr_190352	1020	.	.	.	0.0633333	0.346667	0.5	0.12	0	0	0.19	0.23	0.39	0.42	0.3	0.79	0.41	0	0.12	0.24
Am_Tr_190353	1131	XP_026275496.1_carbon catabolite-derepressing protein kinase-like [Frankliniella occidentalis] KAE8749855.1 hypothetical protein FOCC_FOCC003324 [Frankliniella occidentalis]	.	IPR000719_Protein kinase domain; IPR011009_Protein kinase-like domain superfamily	0	0	0.416667	0	0	0	0	0	0	0	0.87	0.2	0.18	0	0	0
Am_Tr_190354	633	XP_039689790.1_uncharacterized protein LOC120580264 [Medicago truncatula]	.	IPR036875_Zinc finger, CCHC-type superfamily	0	0.29	0	0.0766667	0	0	0	0.67	0	0.2	0	0	0	0.23	0	0
Am_Tr_190355	1268	XP_027193053.1_probable aspartyl protease At4g16563 [Cicer arietinum]	AT4G16563.1_Eukaryotic aspartyl protease family protein	IPR032861_Xylanase inhibitor, N-terminal; IPR021109_Aspartic peptidase domain superfamily	0.186667	0.16	0	0.16	0	0	0.56	0	0.48	0	0	0	0	0	0.48	0
Am_Tr_190356	404	CDO73278.1_hypothetical protein BN946_scf185008.g40 [Trametes cinnabarina]	.	.	0	0	0	0.336667	0	0	0	0	0	0	0	0	0	1.01	0	0
Am_Tr_190357	958	XP_003051531.1_uncharacterized protein NECHADRAFT_104001 [Fusarium vanettenii 77-13-4] EEU45818.1 predicted protein [Fusarium vanettenii 77-13-4]	AT4G11380.1_Adaptin family protein	IPR016024_Armadillo-type fold	0.543333	0	0	0	0	0.26	1.37	0	0	0	0	0	0	0	0	0
Am_Tr_190358	715	KAE8739975.1_Hormone receptor-like in 46, partial [Frankliniella occidentalis]	.	.	0	0	0.3	0	0	0	0	0	0	0	0.56	0.18	0.16	0	0	0
Am_Tr_190359	1497	XP_026271592.1_probable nuclear hormone receptor HR3 isoform X5 [Frankliniella occidentalis]	.	IPR000536_Nuclear hormone receptor, ligand-binding domain; IPR001723_Nuclear hormone receptor; IPR001728_Thyroid hormone receptor; IPR035500_Nuclear hormone receptor-like domain superfamily	0	0	1.04	0	0	0	0	0	0	0	2.72	0.21	0.19	0	0	0
Am_Tr_190360	2971	XP_004504222.1_pentatricopeptide repeat-containing protein At5g46460, mitochondrial [Cicer arietinum]	AT5G46460.1_Pentatricopeptide repeat (PPR) superfamily protein	IPR032867_DYW domain; IPR011990_Tetratricopeptide-like helical domain superfamily; IPR002885_Pentatricopeptide repeat	0.4	1.38333	0.753333	2.48333	0.14	0.84	0.22	1.21	1.48	1.46	0.73	0.82	0.71	2.47	2.49	2.49
Am_Tr_190361	317	.	.	.	0.323333	0	0	0.31	0	0.97	0	0	0	0	0	0	0	0	0.93	0
Am_Tr_190362	497	.	.	.	0	0.306667	0.106667	0.463333	0	0	0	0.33	0	0.59	0	0.32	0	0	1.39	0
Am_Tr_190363	529	TKY64553.1_GDP-fucose protein O-fucosyltransferase [Spatholobus suberectus]	AT1G52630.2_O-fucosyltransferase family protein	.	0.103333	0.1	0.363333	0	0	0.31	0	0.3	0	0	0.25	0.58	0.26	0	0	0
Am_Tr_190364	752	.	.	.	0	0.123333	0.226667	0.06	0	0	0	0.17	0.2	0	0	0.68	0	0	0	0.18
Am_Tr_190365	213	.	.	.	1.7	0	0	0	5.1	0	0	0	0	0	0	0	0	0	0	0
Am_Tr_190366	693	.	.	.	0.0566667	0.0733333	0.173333	0.2	0	0	0.17	0	0.22	0	0	0	0.52	0	0.2	0.4
Am_Tr_190367	642	.	.	.	0.123333	0	0	0.226667	0	0	0.37	0	0	0	0	0	0	0	0.23	0.45
Am_Tr_190368	315	.	.	.	0	0	0	0	0	0	0	0	0	0	0	0	0	0	0	0
Am_Tr_190369	630	.	.	.	0.08	0	0.0633333	0.0766667	0	0.24	0	0	0	0	0.19	0	0	0.23	0	0
Am_Tr_190370	440	.	.	.	0.146667	0	0.496667	0	0	0.44	0	0	0	0	0	0	1.49	0	0	0
Am_Tr_190371	682	.	.	.	0	0.196667	0.0566667	0.07	0	0	0	0	0.23	0.36	0.17	0	0	0	0.21	0
Am_Tr_190372	412	XP_012840930.1_PREDICTED: BTB/POZ domain-containing protein At5g03250 [Erythranthe guttata] EYU34459.1 hypothetical protein MIMGU_mgv1a003106mg [Erythranthe guttata]	AT1G30440.1_Phototropic-responsive NPH3 family protein	.	0	0	0.136667	0	0	0	0	0	0	0	0.41	0	0	0	0	0
Am_Tr_190373	631	.	.	.	0	0.133333	0	0.156667	0	0	0	0	0	0.4	0	0	0	0	0.47	0
Am_Tr_190374	207	.	.	.	0	0	0	0	0	0	0	0	0	0	0	0	0	0	0	0
Am_Tr_190375	1333	.	.	.	0	0.52	0.0533333	0.0566667	0	0	0	0.58	0.75	0.23	0	0.16	0	0.17	0	0
Am_Tr_190376	1072	XP_026272688.1_protein-L-isoaspartate(D-aspartate) O-methyltransferase isoform X1 [Frankliniella occidentalis]	AT3G48330.2_protein-l-isoaspartate methyltransferase 1, GeneName=PIMT1	IPR029063_S-adenosyl-L-methionine-dependent methyltransferase; IPR000682_Protein-L-isoaspartate(D-aspartate) O-methyltransferase	0	0.0733333	1.38333	0	0	0	0	0	0.12	0.1	3.16	0.42	0.57	0	0	0
Am_Tr_190377	1140	XP_026272688.1_protein-L-isoaspartate(D-aspartate) O-methyltransferase isoform X1 [Frankliniella occidentalis]	AT3G48330.2_protein-l-isoaspartate methyltransferase 1, GeneName=PIMT1	IPR029063_S-adenosyl-L-methionine-dependent methyltransferase; IPR000682_Protein-L-isoaspartate(D-aspartate) O-methyltransferase	0	0	0.09	0	0	0	0	0	0	0	0.27	0	0	0	0	0
Am_Tr_190378	1026	.	.	.	0	0.0433333	0.113333	0	0	0	0	0	0.13	0	0	0.34	0	0	0	0
Am_Tr_190379	357	.	.	.	0	0	0.46	0	0	0	0	0	0	0	1.38	0	0	0	0	0
Am_Tr_190380	289	.	.	.	0	0	0.51	0	0	0	0	0	0	0	1.53	0	0	0	0	0
Am_Tr_190381	1142	.	.	.	0	0.433333	0.06	0	0	0	0	1.3	0	0	0.09	0	0.09	0	0	0
Am_Tr_190382	1194	XP_046136576.1_ERV/ALR sulfhydryl oxidase domain-containing protein [Fusarium solani] KAH7271959.1 ERV/ALR sulfhydryl oxidase domain-containing protein [Fusarium solani]	AT1G49880.1_Erv1/Alr family protein, GeneName=Erv1	IPR017905_ERV/ALR sulfhydryl oxidase domain; IPR036774_ERV/ALR sulfhydryl oxidase domain superfamily	0.643333	0	0	0	0	0.1	1.83	0	0	0	0	0	0	0	0	0
Am_Tr_190383	2976	XP_024627733.2_cation/H(+) antiporter 15 [Medicago truncatula] AET04756.1 cation/H+ exchanger 3 [Medicago truncatula] RHN43120.1 putative cation/H+ exchanger, rossmann-like alpha/beta/alpha sandwich [Medicago truncatula]	AT2G13620.1_cation/hydrogen exchanger 15, GeneName=CHX15	IPR006153_Cation/H+ exchanger	0.0133333	0.37	1.17	0.2	0.04	0	0	0.17	0.3	0.64	2.67	0.46	0.38	0.21	0.25	0.14
Am_Tr_190384	3412	XP_045824106.1_cation/H(+) antiporter 15-like [Trifolium pratense]	AT2G13620.1_cation/hydrogen exchanger 15, GeneName=CHX15	IPR006153_Cation/H+ exchanger	1.33333	0.376667	0.786667	0.166667	0.21	0.03	3.76	0.17	0.72	0.24	0.95	0.49	0.92	0.25	0.25	0
Am_Tr_190385	3512	XP_003602627.1_cation/H(+) antiporter 15 [Medicago truncatula] AES72878.1 cation/H+ exchanger 3 [Medicago truncatula] RHN69949.1 putative cation/H+ exchanger [Medicago truncatula]	AT2G13620.1_cation/hydrogen exchanger 15, GeneName=CHX15	IPR006153_Cation/H+ exchanger	0	0	0.09	0	0	0	0	0	0	0	0	0.27	0	0	0	0
Am_Tr_190386	3609	XP_003602627.1_cation/H(+) antiporter 15 [Medicago truncatula] AES72878.1 cation/H+ exchanger 3 [Medicago truncatula] RHN69949.1 putative cation/H+ exchanger [Medicago truncatula]	AT2G13620.1_cation/hydrogen exchanger 15, GeneName=CHX15	.	0.21	0	0.283333	0.07	0.15	0	0.48	0	0	0	0.28	0.29	0.28	0.1	0	0.11
Am_Tr_190387	1369	XP_027355556.1_psbP domain-containing protein 3, chloroplastic isoform X1 [Abrus precatorius]	AT1G76450.1_Photosystem II reaction center PsbP family protein	IPR002683_PsbP, C-terminal; IPR016123_Mog1/PsbP, alpha/beta/alpha sandwich	0	0	0	0	0	0	0	0	0	0	0	0	0	0	0	0
Am_Tr_190388	323	XP_027355559.1_psbP domain-containing protein 3, chloroplastic isoform X4 [Abrus precatorius]	.	.	0	0	0	0	0	0	0	0	0	0	0	0	0	0	0	0
Am_Tr_190389	1201	XP_027355556.1_psbP domain-containing protein 3, chloroplastic isoform X1 [Abrus precatorius]	AT1G76450.1_Photosystem II reaction center PsbP family protein	IPR002683_PsbP, C-terminal; IPR016123_Mog1/PsbP, alpha/beta/alpha sandwich	0.0333333	0.433333	0.0266667	3.09667	0.1	0	0	0.66	0.21	0.43	0.08	0	0	4.18	1.89	3.22
Am_Tr_190390	801	RSL73729.1_hypothetical protein CEP54_000090 [Fusarium sp. AF-8]	.	IPR004299_Membrane bound O-acyl transferase, MBOAT	0.446667	0	0	0	0	0	1.34	0	0	0	0	0	0	0	0	0
Am_Tr_190391	262	GJC89270.1_putative sterol O-acyltransferase 2 [Colletotrichum spaethianum]	.	.	0	0	1.08	0	0	0	0	0	0	0	0	1.65	1.59	0	0	0
Am_Tr_190392	1044	.	.	.	0	0	0.823333	0	0	0	0	0	0	0	0.39	2.08	0	0	0	0
Am_Tr_190393	503	KAE9088661.1_hypothetical protein PF006_g25526, partial [Phytophthora fragariae]	AT1G08920.3_ERD (early response to dehydration) six-like 1, GeneName=ESL1	IPR005828_Major facilitator, sugar transporter-like; IPR003663_Sugar/inositol transporter; IPR036259_MFS transporter superfamily	0.58	0	0	0	0	0.34	1.4	0	0	0	0	0	0	0	0	0
Am_Tr_190394	272	.	.	.	0.47	1.18667	0	0	0	0	1.41	0	3.56	0	0	0	0	0	0	0
Am_Tr_190395	239	.	.	.	0	2.08667	0	0	0	0	0	0	6.26	0	0	0	0	0	0	0
Am_Tr_190396	285	.	.	.	0.903333	0	0	0	0	2.71	0	0	0	0	0	0	0	0	0	0
Am_Tr_190397	314	.	.	.	0	0.583333	0.296667	0.616667	0	0	0	0.93	0	0.82	0	0.89	0	0.93	0	0.92
Am_Tr_190398	387	.	.	.	0.54	0	0	0.373333	1.14	0	0.48	0	0	0	0	0	0	0.55	0.57	0
Am_Tr_190399	755	.	.	.	0.446667	1.47667	0.976667	0.356667	0.18	0.72	0.44	1.21	2.75	0.47	1.04	0.67	1.22	0.71	0	0.36
Am_Tr_190400	374	RYR14555.1_hypothetical protein Ahy_B04g071163 [Arachis hypogaea]	AT1G67510.1_Leucine-rich repeat protein kinase family protein	.	0.38	0.916667	0	0.396667	0.62	0	0.52	1.18	0	1.57	0	0	0	0	0	1.19
Am_Tr_190401	471	RYR14555.1_hypothetical protein Ahy_B04g071163 [Arachis hypogaea]	AT1G67510.1_Leucine-rich repeat protein kinase family protein	.	0	0.14	0	0	0	0	0	0	0.42	0	0	0	0	0	0	0
Am_Tr_190402	736	.	.	.	0.676667	0	0	0	0.93	0.19	0.91	0	0	0	0	0	0	0	0	0
Am_Tr_190403	2613	XP_012573879.1_LOW QUALITY PROTEIN: pentatricopeptide repeat-containing protein At1g26900, mitochondrial [Cicer arietinum]	AT1G26900.1_Pentatricopeptide repeat (PPR) superfamily protein	IPR002885_Pentatricopeptide repeat	0.186667	1.25667	0.826667	1.53667	0	0.4	0.16	1.13	1.31	1.33	0	1.43	1.05	1.04	1.56	2.01
Am_Tr_190404	2496	PNX84162.1_hypothetical protein L195_g040216 [Trifolium pratense]	AT1G26900.1_Pentatricopeptide repeat (PPR) superfamily protein	IPR002885_Pentatricopeptide repeat	0.0433333	0.0666667	0.35	0.0833333	0.13	0	0	0.2	0	0	1.05	0	0	0	0.25	0
Am_Tr_190405	267	.	.	.	0.573333	0	2.02333	0.513333	0	1.72	0	0	0	0	0	4.6	1.47	0	0	1.54
Am_Tr_190406	682	XP_027916332.1_L-ascorbate oxidase homolog isoform X2 [Vigna unguiculata]	AT4G22010.1_SKU5 similar 4, GeneName=sks4	.	0	0	0	0	0	0	0	0	0	0	0	0	0	0	0	0
Am_Tr_190407	278	.	.	.	0	0	0	0	0	0	0	0	0	0	0	0	0	0	0	0
Am_Tr_190408	436	KYP67774.1_Reticulocyte-binding protein 2 isogeny a [Cajanus cajan]	.	.	0.273333	0.326667	0.39	0	0	0.45	0.37	0	0.98	0	0	0.41	0.76	0	0	0
Am_Tr_190409	433	.	.	.	0	0	0	0	0	0	0	0	0	0	0	0	0	0	0	0
Am_Tr_190410	234	.	.	.	0	0	0	0	0	0	0	0	0	0	0	0	0	0	0	0
Am_Tr_190411	242	XP_003843462.1_hypothetical protein LEMA_P075720.1 [Leptosphaeria maculans JN3] CBX99983.1 hypothetical protein LEMA_P075720.1 [Leptosphaeria maculans JN3]	AT5G25754.1_RNA polymerase I-associated factor PAF67	.	0	0	0	0.763333	0	0	0	0	0	0	0	0	0	0	0	2.29
Am_Tr_190412	530	XP_022480840.1_eukaryotic translation initiation factor 3 subunit L [Colletotrichum orchidophilum] XP_035328033.1 eukaryotic translation initiation factor 3 subunit L [Colletotrichum scovillei] EXF76099.1 eukaryotic translation initiation factor 3 subunit L [Colletotrichum fioriniae PJ7] KXH33473.1 eukaryotic translation initiation factor 3 subunit L [Colletotrichum nymphaeae SA-01] KAF4775030.1 …	AT5G25754.1_RNA polymerase I-associated factor PAF67	IPR019382_Translation initiation factor 3 complex subunit L	0	0.176667	0.346667	0	0	0	0	0	0	0.53	0.25	0	0.79	0	0	0
Am_Tr_190413	1191	XP_019414638.1_PREDICTED: uncharacterized protein LOC109326409 [Lupinus angustifolius]	.	.	0.63	0	0	0	1.39	0.1	0.4	0	0	0	0	0	0	0	0	0
Am_Tr_190414	515	.	.	.	0.09	0.24	0.1	0.106667	0	0	0.27	0	0.72	0	0	0.3	0	0	0	0.32
Am_Tr_190415	1026	.	.	.	0	0.173333	0.0666667	0	0	0	0	0.11	0	0.41	0.2	0	0	0	0	0
Am_Tr_190416	244	.	.	.	0	0	0.743333	0	0	0	0	0	0	0	0	2.23	0	0	0	0
Am_Tr_190417	2301	KAE8740654.1_hypothetical protein FOCC_FOCC013802 [Frankliniella occidentalis]	.	IPR016161_Aldehyde/histidinol dehydrogenase; IPR015590_Aldehyde dehydrogenase domain; IPR005931_Delta-1-pyrroline-5-carboxylate dehydrogenase	0	0	0.65	0	0	0	0	0	0	0	1.53	0.3	0.12	0	0	0
Am_Tr_190418	745	PNX93067.1_auxin-induced protein 5ng4-like [Trifolium pratense]	.	.	0	0.253333	0.286667	0	0	0	0	0.2	0.2	0.36	0	0.86	0	0	0	0
Am_Tr_190419	1345	PNX93067.1_auxin-induced protein 5ng4-like [Trifolium pratense]	.	.	0	0.35	0.0933333	0	0	0	0	0.48	0	0.57	0.14	0	0.14	0	0	0
Am_Tr_190420	626	KAE8738957.1_hypothetical protein FOCC_FOCC015557 [Frankliniella occidentalis]	AT2G47170.1_Ras-related small GTP-binding family protein, GeneName=ARF1A1C	IPR006689_Small GTPase superfamily, ARF/SAR type; IPR027417_P-loop containing nucleoside triphosphate hydrolase; IPR005225_Small GTP-binding protein domain	0	0	0.73	0	0	0	0	0	0	0	1.75	0.44	0	0	0	0
Am_Tr_190421	581	.	.	.	0	0.626667	0	0.0866667	0	0	0	0.51	0	1.37	0	0	0	0.26	0	0
Am_Tr_190422	2103	.	.	.	0.426667	0.0466667	0.0466667	0.153333	0.67	0.41	0.2	0.05	0	0.09	0	0.1	0.04	0.2	0.21	0.05
Am_Tr_190423	893	XP_026275431.1_coiled-coil domain-containing protein 6 [Frankliniella occidentalis] KAE8749887.1 hypothetical protein FOCC_FOCC003356 [Frankliniella occidentalis]	.	.	0	0	0.84	0	0	0	0	0	0	0	2.13	0.27	0.12	0	0	0
Am_Tr_190424	2700	XP_027191019.1_uncharacterized protein LOC101511049 [Cicer arietinum]	.	.	0	0.0433333	0.0333333	0.04	0	0	0	0	0.13	0	0	0.07	0.03	0.04	0.04	0.04
Am_Tr_190425	855	RSL70499.1_hypothetical protein CEP54_001683 [Fusarium sp. AF-8]	AT2G40490.1_Uroporphyrinogen decarboxylase, GeneName=HEME2	IPR000257_Uroporphyrinogen decarboxylase (URO-D); IPR038071_UROD/MetE-like superfamily	0.386667	0	0	0	0.15	0.15	0.86	0	0	0	0	0	0	0	0	0
Am_Tr_190426	814	.	.	.	0	0	0.446667	0	0	0	0	0	0	0	1.34	0	0	0	0	0
Am_Tr_190427	518	.	.	.	0	0.0933333	0.183333	0	0	0	0	0	0	0.28	0	0	0.55	0	0	0
Am_Tr_190428	478	.	.	.	0	0.106667	0	0.12	0	0	0	0	0	0.32	0	0	0	0	0	0.36
Am_Tr_190429	255	XP_042969411.1_auxin response factor 8-like isoform X6 [Carya illinoinensis]	AT1G30330.1_auxin response factor 6, GeneName=ARF6	.	0.693333	1.74333	1.82	1.22667	0	2.08	0	1.91	0	3.32	0	3.68	1.78	0	0	3.68
Am_Tr_190430	208	CAD7282694.1_unnamed protein product [Notodromas monacha] CAG0922846.1 unnamed protein product [Notodromas monacha]	.	.	0	0	0	3.45667	0	0	0	0	0	0	0	0	0	10.37	0	0
Am_Tr_190431	438	XP_780735.1_ADP/ATP translocase 3 [Strongylocentrotus purpuratus]	AT5G56450.1_Mitochondrial substrate carrier family protein, GeneName=PM-ANT	IPR002113_ADP/ATP carrier protein, eukaryotic type; IPR023395_Mitochondrial carrier domain superfamily; IPR018108_Mitochondrial substrate/solute carrier	0	0.14	0	0.286667	0	0	0	0.42	0	0	0	0	0	0.86	0	0
Am_Tr_190432	469	XP_022646803.1_ADP,ATP carrier protein 1-like [Varroa destructor] XP_022709983.1 ADP,ATP carrier protein 1-like [Varroa jacobsoni]	AT5G56450.1_Mitochondrial substrate carrier family protein, GeneName=PM-ANT	IPR023395_Mitochondrial carrier domain superfamily; IPR018108_Mitochondrial substrate/solute carrier; IPR002067_Mitochondrial carrier protein	0	0	0	0.5	0	0	0	0	0	0	0	0	0	0.75	0	0.75
Am_Tr_190433	995	OIV97025.1_hypothetical protein TanjilG_19572 [Lupinus angustifolius]	.	.	0.0833333	0	0.0733333	0	0	0.25	0	0	0	0	0	0.12	0.1	0	0	0
Am_Tr_190434	1086	OIV97025.1_hypothetical protein TanjilG_19572 [Lupinus angustifolius]	.	.	0.03	0	0	0	0	0	0.09	0	0	0	0	0	0	0	0	0
Am_Tr_190435	201	CAF3465842.1_unnamed protein product [Fusarium graminearum] CAG1965957.1 unnamed protein product [Fusarium graminearum] VTO93050.1 unnamed protein product [Fusarium graminearum]	.	.	0	0	0	0	0	0	0	0	0	0	0	0	0	0	0	0
Am_Tr_190436	217	XP_046132673.1_uncharacterized protein B0J15DRAFT_492831 [Fusarium solani] KAH7260577.1 hypothetical protein B0J15DRAFT_492831 [Fusarium solani]	.	.	0	0	0	0	0	0	0	0	0	0	0	0	0	0	0	0
Am_Tr_190437	734	.	.	.	0.303333	0.06	0	0.0633333	0.38	0.38	0.15	0.18	0	0	0	0	0	0	0.19	0
Am_Tr_190438	388	.	.	.	0	0.52	0.323333	0.373333	0	0	0	1.08	0	0.48	0	0	0.97	0	1.12	0
Am_Tr_190439	516	XP_046133280.1_terpenoid cyclases/protein prenyltransferase alpha-alpha toroid [Fusarium solani] KAH7264413.1 terpenoid cyclases/protein prenyltransferase alpha-alpha toroid [Fusarium solani]	AT1G78955.5_camelliol C synthase 1, GeneName=CAMS1	IPR032696_Squalene cyclase, C-terminal; IPR008930_Terpenoid cyclases/protein prenyltransferase alpha-alpha toroid	0.713333	0	0	0	0	0	2.14	0	0	0	0	0	0	0	0	0
Am_Tr_190440	499	.	.	.	0	0	0	0	0	0	0	0	0	0	0	0	0	0	0	0
Am_Tr_190441	554	.	.	.	0	0.183333	0.243333	0	0	0	0	0.55	0	0	0.24	0	0.49	0	0	0
Am_Tr_190442	235	.	.	.	0	0	0	0	0	0	0	0	0	0	0	0	0	0	0	0
Am_Tr_190443	387	.	.	.	0	1.11667	0	0.183333	0	0	0	2.72	0.63	0	0	0	0	0.55	0	0
Am_Tr_190444	1056	XP_026281697.1_guanine nucleotide exchange protein smcr8a-like isoform X1 [Frankliniella occidentalis] KAE8745331.1 hypothetical protein FOCC_FOCC007879 [Frankliniella occidentalis]	.	IPR037520_Folliculin/SMCR8, longin domain	0	0.0333333	0.393333	0	0	0	0	0	0	0.1	0.86	0.22	0.1	0	0	0
Am_Tr_190445	615	GAU37960.1_hypothetical protein TSUD_269750 [Trifolium subterraneum]	AT1G22550.1_Major facilitator superfamily protein	IPR036259_MFS transporter superfamily	0	1.65	0.41	1.27667	0	0	0	1.87	2.66	0.42	0.4	0	0.83	1.91	0	1.92
Am_Tr_190446	412	.	.	.	0.723333	0	0	0.323333	0.5	0	1.67	0	0	0	0	0	0	0.97	0	0
Am_Tr_190447	531	.	.	.	0	0.226667	0.0966667	0	0	0	0	0	0.68	0	0	0.29	0	0	0	0
Am_Tr_190448	319	.	.	.	0.58	0	0	0.303333	0.93	0	0.81	0	0	0	0	0	0	0	0.91	0
Am_Tr_190449	788	MCH81894.1_hypothetical protein [Trifolium medium]	.	IPR021109_Aspartic peptidase domain superfamily	0.113333	0.103333	0.146667	0.0566667	0.17	0.17	0	0.16	0	0.15	0.14	0.16	0.14	0	0.17	0
Am_Tr_190450	829	MCH81894.1_hypothetical protein [Trifolium medium]	.	.	0.443333	0.146667	0.176667	0.106667	0.63	0.32	0.38	0.3	0	0.14	0.26	0	0.27	0	0.32	0
Am_Tr_190451	251	KEH16120.1_hypothetical protein MTR_0319s0030, partial [Medicago truncatula]	.	.	0	0	0	0	0	0	0	0	0	0	0	0	0	0	0	0
Am_Tr_190452	285	.	.	.	0	0	0	0	0	0	0	0	0	0	0	0	0	0	0	0
Am_Tr_190453	211	.	.	.	0	1.68333	0	1.58	0	0	0	5.05	0	0	0	0	0	4.74	0	0
Am_Tr_190454	359	.	.	.	0.456667	0	0	0	0.68	0.69	0	0	0	0	0	0	0	0	0	0
Am_Tr_190455	216	.	.	.	0	0	0	0	0	0	0	0	0	0	0	0	0	0	0	0
Am_Tr_190456	433	.	.	.	0	0.4	0	0	0	0	0	0.43	0	0.77	0	0	0	0	0	0
Am_Tr_190457	239	.	.	.	0	0	0	0	0	0	0	0	0	0	0	0	0	0	0	0
Am_Tr_190458	537	RSL48218.1_hypothetical protein CEP54_013049 [Fusarium sp. AF-8]	.	.	0.913333	0	0	0	0	0	2.74	0	0	0	0	0	0	0	0	0
Am_Tr_190459	1341	XP_027342812.1_trihelix transcription factor ASIL1-like [Abrus precatorius]	AT3G54390.1_sequence-specific DNA binding transcription factor	IPR044822_Myb/SANT-like DNA-binding domain 4	1.79	3.98333	6.13333	13.99	1.21	3.06	1.1	1.3	7.15	3.5	6.5	6.34	5.56	9.86	22.89	9.22
Am_Tr_190460	1353	PNX56274.1_transcription factor, partial [Trifolium pratense] PNX91552.1 transcription factor, partial [Trifolium pratense]	AT3G54390.1_sequence-specific DNA binding transcription factor	.	0.0366667	0.27	0.166667	0.49	0	0.11	0	0.18	0.63	0	0.21	0	0.29	0.77	0.24	0.46
Am_Tr_190461	1501	XP_027342812.1_trihelix transcription factor ASIL1-like [Abrus precatorius]	AT3G54390.1_sequence-specific DNA binding transcription factor	IPR044822_Myb/SANT-like DNA-binding domain 4	0	0.176667	0.35	0.46	0	0	0	0.14	0	0.39	0	0.72	0.33	0	1.09	0.29
Am_Tr_190462	1482	XP_027342812.1_trihelix transcription factor ASIL1-like [Abrus precatorius]	AT3G54390.1_sequence-specific DNA binding transcription factor	IPR044822_Myb/SANT-like DNA-binding domain 4	0	0.21	0.0333333	0	0	0	0	0	0.63	0	0.1	0	0	0	0	0
Am_Tr_190463	590	XP_016179747.1_cationic peroxidase 2 [Arachis ipaensis]	AT5G64120.1_Peroxidase superfamily protein	.	0	0.283333	0	0	0	0	0	0	0.85	0	0	0	0	0	0	0
Am_Tr_190464	553	XP_016179747.1_cationic peroxidase 2 [Arachis ipaensis]	AT5G64120.1_Peroxidase superfamily protein	.	3.36667	2.06667	0	4.43333	3.18	0.29	6.63	3.59	0.63	1.98	0	0	0	13.3	0	0
Am_Tr_190465	477	.	.	.	0	0.703333	0.453333	0.606667	0	0	0	1.79	0	0.32	0	1.04	0.32	1.46	0	0.36
Am_Tr_190466	764	.	.	.	0	0	0.403333	0	0	0	0	0	0	0	0.73	0.33	0.15	0	0	0
Am_Tr_190467	1703	KYP41567.1_Retrotransposable element Tf2 [Cajanus cajan]	.	.	0.0533333	0.12	0.126667	0.13	0	0.06	0.1	0.12	0.07	0.17	0.22	0	0.16	0.13	0.13	0.13
Am_Tr_190468	2003	XP_046139694.1_uncharacterized protein B0J15DRAFT_474089 [Fusarium solani] KAH7275077.1 hypothetical protein B0J15DRAFT_474089 [Fusarium solani]	AT5G06460.1_ubiquitin activating enzyme 2, GeneName=UBA 2	IPR018965_Ubiquitin-activating enzyme E1, C-terminal; IPR018075_Ubiquitin-activating enzyme E1; IPR035985_Ubiquitin-activating enzyme; IPR000594_THIF-type NAD/FAD binding fold; IPR019572_Ubiquitin-activating enzyme, SCCH domain	0.626667	0	0	0	0.05	0.15	1.68	0	0	0	0	0	0	0	0	0
Am_Tr_190469	757	XP_046139694.1_uncharacterized protein B0J15DRAFT_474089 [Fusarium solani] KAH7275077.1 hypothetical protein B0J15DRAFT_474089 [Fusarium solani]	AT5G06460.1_ubiquitin activating enzyme 2, GeneName=UBA 2	IPR019572_Ubiquitin-activating enzyme, SCCH domain; IPR000594_THIF-type NAD/FAD binding fold; IPR035985_Ubiquitin-activating enzyme; IPR018965_Ubiquitin-activating enzyme E1, C-terminal	0.17	0	0	0.06	0	0.05	0.46	0	0	0	0	0	0	0.18	0	0
Am_Tr_190470	2096	XP_035331441.1_ubiquitin-activating enzyme E1 [Colletotrichum scovillei] KAF4778438.1 ubiquitin-activating enzyme E1 [Colletotrichum scovillei]	AT2G30110.1_ubiquitin-activating enzyme 1, GeneName=UBA1	IPR035985_Ubiquitin-activating enzyme; IPR018965_Ubiquitin-activating enzyme E1, C-terminal; IPR030661_SUMO-activating enzyme subunit Uba2; IPR000594_THIF-type NAD/FAD binding fold; IPR018075_Ubiquitin-activating enzyme E1; IPR019572_Ubiquitin-activating enzyme, SCCH domain	0.0133333	0.03	0.97	0.0166667	0	0	0.04	0	0	0.09	1.74	0.48	0.69	0	0.05	0
Am_Tr_190471	304	XP_043070667.1_serine-rich adhesin for platelets [Drosophila grimshawi]	.	IPR013761_Sterile alpha motif/pointed domain superfamily	0	0	1.14667	0	0	0	0	0	0	0	3.44	0	0	0	0	0
Am_Tr_190472	264	XP_003054363.1_uncharacterized protein NECHADRAFT_31391 [Fusarium vanettenii 77-13-4] EEU48650.1 hypothetical protein NECHADRAFT_31391 [Fusarium vanettenii 77-13-4]	.	.	1.06667	0	0	0	0	0	3.2	0	0	0	0	0	0	0	0	0
Am_Tr_190473	406	XP_046138596.1_uncharacterized protein B0J15DRAFT_385515 [Fusarium solani] KAH7273979.1 hypothetical protein B0J15DRAFT_385515 [Fusarium solani]	.	.	0.78	0	0	0	0	1.04	1.3	0	0	0	0	0	0	0	0	0
Am_Tr_190474	981	KAG7291894.1_hypothetical protein NEMBOFW57_001918 [Staphylotrichum longicolle]	.	IPR043129_ATPase, nucleotide binding domain; IPR013126_Heat shock protein 70 family	0	0	0.283333	0	0	0	0	0	0	0	0.21	0	0.64	0	0	0
Am_Tr_190475	2461	XP_046136177.1_uncharacterized protein B0J15DRAFT_218949 [Fusarium solani] KAH7271560.1 hypothetical protein B0J15DRAFT_218949 [Fusarium solani]	.	IPR043129_ATPase, nucleotide binding domain; IPR013126_Heat shock protein 70 family	0.603333	0	0	0.0133333	0	0.09	1.72	0	0	0	0	0	0	0	0	0.04
Am_Tr_190476	961	KAG8405705.1_hypothetical protein J3459_021528 [Metarhizium acridum]	.	.	0	0.0366667	0.65	0.13	0	0	0	0	0	0.11	1.5	0.12	0.33	0	0	0.39
Am_Tr_190477	300	.	.	.	0	0	0	0	0	0	0	0	0	0	0	0	0	0	0	0
Am_Tr_190478	323	WP_215903199.1_hypothetical protein, partial [Acinetobacter baumannii]	.	.	0	0	0	1.14	0	0	0	0	0	0	0	0	0	3.42	0	0
Am_Tr_190479	429	NP_001235150.1_FCS-like zinc-finger domain-containing protein [Glycine max] XP_028240106.1 FCS-Like Zinc finger 3-like [Glycine soja] ACU14475.1 unknown [Glycine max] KAG5009651.1 hypothetical protein JHK87_018166 [Glycine soja] KAG5022359.1 hypothetical protein JHK85_018701 [Glycine max] KAG5037461.1 hypothetical protein JHK86_018301 [Glycine max] KAG5142583.1 hypothetical protein JHK82_018278 […	.	.	0	0.17	0.45	0	0	0	0	0	0.51	0	0	0.42	0.93	0	0	0
Am_Tr_190480	323	TKY68857.1_hypothetical protein E2542_SST05119 [Spatholobus suberectus]	.	.	0	0	0.42	0	0	0	0	0	0	0	0	0	1.26	0	0	0
Am_Tr_190481	226	.	.	.	0	0	0	0	0	0	0	0	0	0	0	0	0	0	0	0
Am_Tr_190482	244	XP_033463522.1_Phosphoglucomutase, first 3 domain-containing protein [Dissoconium aciculare CBS 342.82] KAF1826486.1 Phosphoglucomutase, first 3 domain-containing protein [Dissoconium aciculare CBS 342.82]	AT1G70730.1_Phosphoglucomutase/phosphomannomutase family protein, GeneName=PGM2	.	0	0.77	0	0	0	0	0	2.31	0	0	0	0	0	0	0	0
Am_Tr_190483	976	KXH45115.1_peptidase family M3 [Colletotrichum simmondsii]	AT5G51540.1_Zincin-like metalloproteases family protein	IPR001567_Peptidase M3A/M3B catalytic domain	0	0	0.986667	0	0	0	0	0	0	0	2.52	0.12	0.32	0	0	0
Am_Tr_190484	224	XP_003852540.1_uncharacterized protein MYCGRDRAFT_59247 [Zymoseptoria tritici IPO323] EGP87516.1 hypothetical protein MYCGRDRAFT_59247 [Zymoseptoria tritici IPO323]	AT5G51540.1_Zincin-like metalloproteases family protein	.	0	1.47667	0	0	0	0	0	0	4.43	0	0	0	0	0	0	0
Am_Tr_190485	439	XP_045798775.1_NAC domain-containing protein 2-like [Trifolium pratense]	.	.	0	0.14	0	0	0	0	0	0.42	0	0	0	0	0	0	0	0
Am_Tr_190486	542	TKY62163.1_NAC transcription factor 29 [Spatholobus suberectus]	.	.	0	0.326667	0.35	0.293333	0	0	0	0	0.98	0	0.49	0.56	0	0.29	0.3	0.29
Am_Tr_190487	531	AFK41741.1_unknown [Lotus japonicus]	AT2G16660.1_Major facilitator superfamily protein	.	0	0.746667	0.0833333	0	0	0	0	1.18	0	1.06	0.25	0	0	0	0	0
Am_Tr_190488	261	RMJ07277.1_hypothetical protein CDV36_013132 [Fusarium kuroshium]	.	.	1.67667	0	0	0	0	0	5.03	0	0	0	0	0	0	0	0	0
Am_Tr_190489	308	XP_003052553.1_uncharacterized protein NECHADRAFT_91804 [Fusarium vanettenii 77-13-4] EEU46840.1 hypothetical protein NECHADRAFT_91804 [Fusarium vanettenii 77-13-4]	.	.	0.3	0	0	0	0	0	0.9	0	0	0	0	0	0	0	0	0
Am_Tr_190490	432	.	AT4G39150.1_DNAJ heat shock N-terminal domain-containing protein	.	0	0.366667	0	0	0	0	0	0	0.33	0.77	0	0	0	0	0	0
Am_Tr_190491	1026	.	.	.	0	0.28	0.0666667	0.08	0	0	0	0.46	0.17	0.21	0.2	0	0	0.12	0.12	0
Am_Tr_190492	1012	RDX74042.1_hypothetical protein CR513_46251, partial [Mucuna pruriens]	.	.	0.08	0.543333	0.0466667	0.373333	0	0.24	0	1.63	0	0	0	0.14	0	0.54	0	0.58
Am_Tr_190493	2680	XP_003590788.2_uncharacterized protein LOC11429751 [Medicago truncatula] XP_039684450.1 uncharacterized protein LOC11429751 [Medicago truncatula] XP_039684453.1 uncharacterized protein LOC11429751 [Medicago truncatula] XP_039684455.1 uncharacterized protein LOC11429751 [Medicago truncatula] XP_039684456.1 uncharacterized protein LOC11429751 [Medicago truncatula] AES61039.2 hypothetical protein MT…	.	.	0	1	0	0.163333	0	0	0	1.77	0.41	0.82	0	0	0	0.07	0.07	0.35
Am_Tr_190494	2806	XP_003590788.2_uncharacterized protein LOC11429751 [Medicago truncatula] XP_039684450.1 uncharacterized protein LOC11429751 [Medicago truncatula] XP_039684453.1 uncharacterized protein LOC11429751 [Medicago truncatula] XP_039684455.1 uncharacterized protein LOC11429751 [Medicago truncatula] XP_039684456.1 uncharacterized protein LOC11429751 [Medicago truncatula] AES61039.2 hypothetical protein MT…	.	.	0	1.48	0.866667	0.143333	0	0	0	1.86	1.39	1.19	0	1.13	1.47	0.4	0.03	0
Am_Tr_190495	2201	XP_003590788.2_uncharacterized protein LOC11429751 [Medicago truncatula] XP_039684450.1 uncharacterized protein LOC11429751 [Medicago truncatula] XP_039684453.1 uncharacterized protein LOC11429751 [Medicago truncatula] XP_039684455.1 uncharacterized protein LOC11429751 [Medicago truncatula] XP_039684456.1 uncharacterized protein LOC11429751 [Medicago truncatula] AES61039.2 hypothetical protein MT…	.	.	0	1.85667	0.133333	0.243333	0	0	0	3.55	1.3	0.72	0.4	0	0	0.52	0.21	0
Am_Tr_190496	2075	XP_003590788.2_uncharacterized protein LOC11429751 [Medicago truncatula] XP_039684450.1 uncharacterized protein LOC11429751 [Medicago truncatula] XP_039684453.1 uncharacterized protein LOC11429751 [Medicago truncatula] XP_039684455.1 uncharacterized protein LOC11429751 [Medicago truncatula] XP_039684456.1 uncharacterized protein LOC11429751 [Medicago truncatula] AES61039.2 hypothetical protein MT…	.	.	0	10.4233	4.4	1.49667	0	0	0	11.81	9.71	9.75	6.49	3.03	3.68	2.8	1	0.69
Am_Tr_190497	1795	KAG4997788.1_hypothetical protein JHK85_029227 [Glycine max] KAG5152335.1 hypothetical protein JHK84_028807 [Glycine max]	.	.	0	1.74	0.47	0.216667	0	0	0	2.75	1.4	1.07	1.05	0.06	0.3	0.65	0	0
Am_Tr_190498	1361	RDX74042.1_hypothetical protein CR513_46251, partial [Mucuna pruriens]	.	.	0	0.146667	0	0	0	0	0	0	0.44	0	0	0	0	0	0	0
Am_Tr_190499	1535	RDX74042.1_hypothetical protein CR513_46251, partial [Mucuna pruriens]	.	.	0	0.246667	0.13	0	0	0	0	0.49	0	0.25	0.39	0	0	0	0	0
Am_Tr_190500	1323	RZC29062.1_Transposon Tf2-9 polyprotein [Glycine soja]	.	.	0.11	0.586667	0.36	0.0566667	0	0.26	0.07	0.76	0.85	0.15	0.14	0.57	0.37	0.17	0	0
Am_Tr_190501	416	.	.	.	0	0	0.396667	0	0	0	0	0	0	0	1.19	0	0	0	0	0
Am_Tr_190502	465	.	.	.	0	0.286667	0.12	0.833333	0	0	0	0	0.86	0	0	0.36	0	1.72	0.78	0
Am_Tr_190503	473	.	.	.	0	0	0	0.183333	0	0	0	0	0	0	0	0	0	0.55	0	0
Am_Tr_190504	342	GFR64384.1_40S ribosomal protein S25 [Elysia marginata]	AT2G21580.2_Ribosomal protein S25 family protein	IPR004977_Ribosomal protein S25; IPR036390_Winged helix DNA-binding domain superfamily	0	0	0	0	0	0	0	0	0	0	0	0	0	0	0	0
Am_Tr_190505	352	GFR64384.1_40S ribosomal protein S25 [Elysia marginata]	AT2G21580.2_Ribosomal protein S25 family protein	IPR004977_Ribosomal protein S25	0	0	0	0.23	0	0	0	0	0	0	0	0	0	0.69	0	0
Am_Tr_190506	798	XP_027192669.1_uncharacterized protein LOC101515717 [Cicer arietinum]	AT1G64255.1_MuDR family transposase	.	0.36	0	0.386667	0.103333	0	0	1.08	0	0	0	0.27	0.47	0.42	0.16	0.15	0
Am_Tr_190507	1028	RDX80042.1_Orf V, partial [Mucuna pruriens]	.	IPR043502_DNA/RNA polymerase superfamily	0	0	0	0	0	0	0	0	0	0	0	0	0	0	0	0
Am_Tr_190508	560	.	.	.	0.36	0	0	0	0.85	0	0.23	0	0	0	0	0	0	0	0	0
Am_Tr_190509	1144	KYP33646.1_polyprotein [Cajanus cajan]	.	IPR043502_DNA/RNA polymerase superfamily	0	0	0.0566667	0	0	0	0	0	0	0	0.17	0	0	0	0	0
Am_Tr_190510	731	KYP37097.1_polyprotein [Cajanus cajan]	.	IPR041577_Reverse transcriptase/retrotransposon-derived protein, RNase H-like domain; IPR043502_DNA/RNA polymerase superfamily	0.28	0.07	0.156667	0.123333	0.19	0.19	0.46	0	0.21	0	0.31	0	0.16	0	0	0.37
Am_Tr_190511	938	.	.	.	0.0466667	0.16	0.163333	0.18	0	0.14	0	0.13	0	0.35	0	0.38	0.11	0	0.27	0.27
Am_Tr_190512	529	.	.	.	0.19	0.213333	0.556667	0.2	0.31	0	0.26	0.3	0.34	0	0.25	1.16	0.26	0.3	0	0.3
Am_Tr_190513	380	.	.	.	1.11	0.336667	0	0	1.19	0.6	1.54	0	0	1.01	0	0	0	0	0	0
Am_Tr_190514	712	.	.	.	0.0666667	0	0	0.196667	0	0.2	0	0	0	0	0	0	0	0	0.59	0
Am_Tr_190515	342	.	.	.	1.02667	0	0	0.246667	3.08	0	0	0	0	0	0	0	0	0.74	0	0
Am_Tr_190516	507	QJI07016.1_translation elongation factor 1 alpha, partial [Pyrenochaetopsis chromolaenae]	AT1G07930.1_GTP binding Elongation factor Tu family protein	IPR004161_Translation elongation factor EFTu-like, domain 2; IPR027417_P-loop containing nucleoside triphosphate hydrolase; IPR009000_Translation protein, beta-barrel domain superfamily	0	0.213333	0.09	0.796667	0	0	0	0.64	0	0	0.27	0	0	2.39	0	0
Am_Tr_190517	406	UBZ25084.1_translation elongation factor 1-alpha, partial [Neofusicoccum sp.]	AT1G07930.1_GTP binding Elongation factor Tu family protein	IPR004161_Translation elongation factor EFTu-like, domain 2; IPR009000_Translation protein, beta-barrel domain superfamily; IPR027417_P-loop containing nucleoside triphosphate hydrolase	0	0	2.29667	0	0	0	0	0	0	0	6.89	0	0	0	0	0
Am_Tr_190518	404	BCY15858.1_translation elongation factor 1-alpha, partial [Pleosporales sp.]	AT1G07930.1_GTP binding Elongation factor Tu family protein	IPR027417_P-loop containing nucleoside triphosphate hydrolase	0	0.146667	0.776667	0	0	0	0	0	0	0.44	2.33	0	0	0	0	0
Am_Tr_190519	407	QCZ35491.1_translation elongation factor 1-alpha, partial [Daldinia sp.]	AT1G07930.1_GTP binding Elongation factor Tu family protein	IPR027417_P-loop containing nucleoside triphosphate hydrolase	0	0	0.736667	0	0	0	0	0	0	0	0.83	1.38	0	0	0	0
Am_Tr_190520	468	QNR59711.1_translation initiation factor 1 alpha, partial [Preussia sp. 8 MP-2020] QNR59741.1 translation initiation factor 1 alpha, partial [Preussia sp. 10 MP-2020]	AT1G07930.1_GTP binding Elongation factor Tu family protein	IPR027417_P-loop containing nucleoside triphosphate hydrolase	0	0.143333	0.24	1.74	0	0	0	0	0.43	0	0	0.72	0	2.13	3.09	0
Am_Tr_190521	409	AJB29925.1_translation elongation factor 1-alpha, partial [Annulohypoxylon sp. NS-2014]	AT1G07930.1_GTP binding Elongation factor Tu family protein	IPR004161_Translation elongation factor EFTu-like, domain 2; IPR009000_Translation protein, beta-barrel domain superfamily	0.453333	0	0	0	0	0.51	0.85	0	0	0	0	0	0	0	0	0
Am_Tr_190522	274	AIM46988.1_translation elongation factor 1-alpha, partial [Colponema edaphicum]	AT1G07930.1_GTP binding Elongation factor Tu family protein	.	0	0	0	0	0	0	0	0	0	0	0	0	0	0	0	0
Am_Tr_190523	610	ABQ41398.1_elongation factor 1A, partial [Cavostelium apophysatum]	AT1G07930.2_GTP binding Elongation factor Tu family protein	IPR000795_Translational (tr)-type GTP-binding domain; IPR027417_P-loop containing nucleoside triphosphate hydrolase	0.0666667	0	0	0	0	0	0.2	0	0	0	0	0	0	0	0	0
Am_Tr_190524	309	ATP15555.1_elongation factor 1 alpha, partial [Melanaspis sp. D1888A]	AT1G07930.1_GTP binding Elongation factor Tu family protein	IPR009000_Translation protein, beta-barrel domain superfamily	1.19333	0	0	0	0	0	3.58	0	0	0	0	0	0	0	0	0
Am_Tr_190525	1567	XP_004489382.1_uncharacterized protein At5g39865 [Cicer arietinum]	AT5G39865.1_Glutaredoxin family protein	IPR002109_Glutaredoxin; IPR036249_Thioredoxin-like superfamily	5.03333	0.99	1.52	3.73667	5.37	3.14	6.59	1.31	0.85	0.81	0.89	1.14	2.53	5.46	2.47	3.28
Am_Tr_190526	3732	XP_004507973.1_protein PLASTID MOVEMENT IMPAIRED 1-RELATED 1-like [Cicer arietinum] XP_004507974.1 protein PLASTID MOVEMENT IMPAIRED 1-RELATED 1-like [Cicer arietinum]	AT5G20610.1_EEIG1/EHBP1 protein amino-terminal domain protein	IPR036779_LysM domain superfamily; IPR018392_LysM domain; IPR019448_NT-type C2 domain	0.04	0	0.52	0.0633333	0	0.03	0.09	0	0	0	1.02	0.49	0.05	0.16	0	0.03
Am_Tr_190527	407	.	.	.	0	0	0	0	0	0	0	0	0	0	0	0	0	0	0	0
Am_Tr_190528	234	.	.	.	0.95	0.94	0	0	0	0	2.85	2.82	0	0	0	0	0	0	0	0
Am_Tr_190529	1257	.	.	.	0	0	0.193333	0.183333	0	0	0	0	0	0	0.08	0.26	0.24	0.55	0	0
Am_Tr_190530	489	XP_046137681.1_signal recognition particle receptor beta subunit-domain-containing protein [Fusarium solani] KAH7273064.1 signal recognition particle receptor beta subunit-domain-containing protein [Fusarium solani]	.	IPR027417_P-loop containing nucleoside triphosphate hydrolase; IPR019009_Signal recognition particle receptor, beta subunit	0.69	0	0	0	0	0	2.07	0	0	0	0	0	0	0	0	0
Am_Tr_190531	367	.	.	.	0.4	0	0.356667	0	0.65	0	0.55	0	0	0	0.52	0	0.55	0	0	0
Am_Tr_190532	417	.	.	.	0.58	0.983333	0.133333	0.16	0.49	0	1.25	0.93	1.61	0.41	0.4	0	0	0	0.48	0
Am_Tr_190533	598	XP_009529554.1_hypothetical protein PHYSODRAFT_315976 [Phytophthora sojae] EGZ15805.1 hypothetical protein PHYSODRAFT_315976 [Phytophthora sojae]	.	.	0.36	0	0	0	0.25	0	0.83	0	0	0	0	0	0	0	0	0
Am_Tr_190534	1231	.	.	.	0	0	0	0	0	0	0	0	0	0	0	0	0	0	0	0
Am_Tr_190535	387	.	.	.	0	0.18	0	0.136667	0	0	0	0.54	0	0	0	0	0	0.41	0	0
Am_Tr_190536	1195	.	.	.	0.126667	0.276667	0.313333	0.403333	0.3	0	0.08	0.28	0.43	0.12	0.41	0.28	0.25	0.12	0.5	0.59
Am_Tr_190537	888	.	.	.	0	0.146667	0.0433333	0	0	0	0	0	0	0.44	0	0.13	0	0	0	0
Am_Tr_190538	744	.	.	.	0.16	0.21	0	0.243333	0.18	0	0.3	0	0	0.63	0	0	0	0.36	0.19	0.18
Am_Tr_190539	1079	.	.	.	0.0366667	0.143333	0.17	0.0733333	0.11	0	0	0.43	0	0	0.28	0.14	0.09	0	0.11	0.11
Am_Tr_190540	1315	.	.	.	0.0466667	0.163333	0.1	0.15	0	0	0.14	0	0.49	0	0	0.3	0	0	0.45	0
Am_Tr_190541	433	.	.	.	0	0	0.266667	0	0	0	0	0	0	0	0	0.42	0.38	0	0	0
Am_Tr_190542	272	.	.	.	2.01333	1.29667	0	1.45667	0	3.21	2.83	0	0	3.89	0	0	0	4.37	0	0
Am_Tr_190543	239	.	.	.	0	0	0	0	0	0	0	0	0	0	0	0	0	0	0	0
Am_Tr_190544	239	.	.	.	0	0	0	0.85	0	0	0	0	0	0	0	0	0	0	2.55	0
Am_Tr_190545	1415	XP_039683207.1_GRF1-interacting factor 1 isoform X2 [Medicago truncatula] RHN49422.1 putative transcription factor SSXT family [Medicago truncatula]	AT5G28640.1_SSXT family protein, GeneName=AN3	IPR007726_SS18, N-terminal	0	0.163333	0.633333	0	0	0	0	0.23	0.26	0	0.73	0.83	0.34	0	0	0
Am_Tr_190546	364	POE55923.1_protein weak chloroplast movement under blue light 1 [Quercus suber]	AT1G45545.1_WEAK CHLOROPLAST MOVEMENT UNDER BLUE LIGHT-like protein (DUF827)	.	0.223333	0	0.19	0	0	0.67	0	0	0	0	0	0	0.57	0	0	0
Am_Tr_190547	1755	XP_038712154.1_heat stress transcription factor B-2a-like [Tripterygium wilfordii] KAF5742272.1 heat stress transcription factor B-2a-like [Tripterygium wilfordii]	AT4G13980.1_winged-helix DNA-binding transcription factor family protein, GeneName=AT-HSFA5	.	0.393333	0.0633333	0.0566667	0.233333	0.94	0.19	0.05	0	0.14	0.05	0	0.06	0.11	0.06	0.45	0.19
Am_Tr_190548	267	POM57975.1_Copper-transporting ATPase, partial [Phytophthora palmivora var. palmivora]	AT1G63440.1_heavy metal atpase 5, GeneName=HMA5	.	1.01667	0	0	0	0	0	3.05	0	0	0	0	0	0	0	0	0
Am_Tr_190549	897	ETI45649.1_hypothetical protein F443_09849, partial [Phytophthora parasitica P1569]	AT5G44790.1_copper-exporting ATPase / responsive-to-antagonist 1 / copper-transporting ATPase (RAN1), GeneName=RAN1	IPR023299_P-type ATPase, cytoplasmic domain N; IPR001757_P-type ATPase; IPR036412_HAD-like superfamily	0.58	0	0	0	0.28	1	0.46	0	0	0	0	0	0	0	0	0
Am_Tr_190550	248	XP_044644352.1_Cu(2+)-transporting P-type ATPase CCC2 [Diaporthe batatas] KAG8163624.1 hypothetical protein KVR01_006921 [Diaporthe batatas]	AT5G44790.1_copper-exporting ATPase / responsive-to-antagonist 1 / copper-transporting ATPase (RAN1), GeneName=RAN1	.	0	0	0	1.39	0	0	0	0	0	0	0	0	0	4.17	0	0
Am_Tr_190551	435	.	.	.	0.273333	0.283333	0	0.146667	0.45	0	0.37	0.85	0	0	0	0	0	0	0.44	0
Am_Tr_190552	604	.	.	.	0.0666667	0.153333	0	0	0	0	0.2	0.24	0	0.22	0	0	0	0	0	0
Am_Tr_190553	467	MCH99098.1_cellulose synthase A catalytic subunit 3 [Trifolium medium]	AT5G05170.1_Cellulose synthase family protein, GeneName=CEV1	IPR005150_Cellulose synthase	2.31333	2.92	4.4	4.19333	2.72	1.96	2.26	1.49	4.28	2.99	4.45	5.77	2.98	5.69	3.1	3.79
Am_Tr_190554	696	XP_024582288.1_elongation factor 1-alpha [Plasmopara halstedii] CEG45919.1 elongation factor 1-alpha [Plasmopara halstedii]	AT1G07930.1_GTP binding Elongation factor Tu family protein	IPR009001_Translation elongation factor EF1A/initiation factor IF2gamma, C-terminal; IPR004160_Translation elongation factor EFTu/EF1A, C-terminal; IPR004161_Translation elongation factor EFTu-like, domain 2; IPR009000_Translation protein, beta-barrel domain superfamily; IPR027417_P-loop containing nucleoside triphosphate hydrolase	0.12	0	0	0.4	0	0.2	0.16	0	0	0	0	0	0	1	0	0.2
Am_Tr_190555	506	.	.	.	0	0	0.643333	0	0	0	0	0	0	0	1.93	0	0	0	0	0
Am_Tr_190556	771	XP_046128392.1_CTP synthase N-terminus-domain-containing protein [Fusarium solani] KAH7247956.1 CTP synthase N-terminus-domain-containing protein [Fusarium solani]	AT1G30820.1_CTP synthase family protein	IPR017456_CTP synthase, N-terminal; IPR027417_P-loop containing nucleoside triphosphate hydrolase	0.473333	0	0	0	0	0	1.42	0	0	0	0	0	0	0	0	0
Am_Tr_190557	643	XP_010522620.1_PREDICTED: ELMO domain-containing protein A isoform X4 [Tarenaya hassleriana] XP_010522621.1 PREDICTED: ELMO domain-containing protein A isoform X4 [Tarenaya hassleriana] XP_010522622.1 PREDICTED: ELMO domain-containing protein A isoform X4 [Tarenaya hassleriana] XP_010522623.1 PREDICTED: ELMO domain-containing protein A isoform X4 [Tarenaya hassleriana] XP_010522626.1 PREDICTED: E…	AT1G03620.2_ELMO/CED-12 family protein	.	0	0.166667	0.523333	0	0	0	0	0	0.5	0	0.56	0.24	0.77	0	0	0
Am_Tr_190558	523	XP_039161910.1_ELMO domain-containing protein B isoform X6 [Eucalyptus grandis] KCW89509.1 hypothetical protein EUGRSUZ_A01798 [Eucalyptus grandis]	AT1G03620.2_ELMO/CED-12 family protein	.	0	0.1	0.476667	0.31	0	0	0	0.3	0	0	0	1.43	0	0.31	0	0.62
Am_Tr_190559	717	.	.	.	0.323333	0	0.113333	0.126667	0.97	0	0	0	0	0	0	0.18	0.16	0	0	0.38
Am_Tr_190560	757	.	.	.	0.3	0	0.05	0.116667	0	0.9	0	0	0	0	0.15	0	0	0.35	0	0
Am_Tr_190561	1159	XP_045814106.1_phosphoribosylaminoimidazole-succinocarboxamide synthase, chloroplastic-like [Trifolium pratense] XP_045814107.1 phosphoribosylaminoimidazole-succinocarboxamide synthase, chloroplastic-like [Trifolium pratense]	.	.	0	0	0	0.0333333	0	0	0	0	0	0	0	0	0	0	0.1	0
Am_Tr_190562	1139	XP_045814106.1_phosphoribosylaminoimidazole-succinocarboxamide synthase, chloroplastic-like [Trifolium pratense] XP_045814107.1 phosphoribosylaminoimidazole-succinocarboxamide synthase, chloroplastic-like [Trifolium pratense]	.	.	0.833333	0.403333	0.366667	0	1.98	0.52	0	1.21	0	0	0.61	0.49	0	0	0	0
Am_Tr_190563	307	.	.	.	0	0.39	0	0.653333	0	0	0	0	1.17	0	0	0	0	0	0	1.96
Am_Tr_190564	225	.	.	.	1.27	1.15333	0	0	0	3.81	0	3.46	0	0	0	0	0	0	0	0
Am_Tr_190565	522	.	.	.	0.173333	0.436667	0.1	0	0	0	0.52	0.61	0.7	0	0	0.3	0	0	0	0
Am_Tr_190566	949	XP_045814106.1_phosphoribosylaminoimidazole-succinocarboxamide synthase, chloroplastic-like [Trifolium pratense] XP_045814107.1 phosphoribosylaminoimidazole-succinocarboxamide synthase, chloroplastic-like [Trifolium pratense]	.	.	0.45	0	0.08	0.0866667	0.95	0.4	0	0	0	0	0	0.24	0	0.26	0	0
Am_Tr_190567	304	.	.	.	0	0	0.33	0	0	0	0	0	0	0	0	0.99	0	0	0	0
Am_Tr_190568	1124	.	.	.	0	0	0.243333	0.14	0	0	0	0	0	0	0	0.6	0.13	0	0.42	0
Am_Tr_190569	652	.	.	.	0	0	0	0.01	0	0	0	0	0	0	0	0	0	0	0.03	0
Am_Tr_190570	995	.	.	.	0.233333	0.09	0.19	0.0833333	0.25	0.25	0.2	0	0.27	0	0.41	0	0.16	0	0	0.25
Am_Tr_190571	236	.	.	.	1.91	0	0	0	5.73	0	0	0	0	0	0	0	0	0	0	0
Am_Tr_190572	763	.	.	.	7.18667	0.163333	0.16	0.176667	12.61	3.2	5.75	0.34	0	0.15	0	0.33	0.15	0.17	0.18	0.18
Am_Tr_190573	866	.	.	.	0	1.21333	0	0	0	0	0	2.86	0.65	0.13	0	0	0	0	0	0
Am_Tr_190574	1884	XP_026290334.1_zinc finger protein 850-like isoform X2 [Frankliniella occidentalis]	.	IPR036236_Zinc finger C2H2 superfamily; IPR013087_Zinc finger C2H2-type	0	0.0533333	0.59	0	0	0	0	0	0.06	0.1	1.34	0.33	0.1	0	0	0
Am_Tr_190575	1714	XP_026278373.1_protein AATF-like [Frankliniella occidentalis]	AT5G61330.1_rRNA processing protein-like protein	IPR025160_AATF leucine zipper-containing domain; IPR012617_Apoptosis-antagonizing transcription factor, C-terminal	0	0	0.923333	0	0	0	0	0	0	0	2.3	0.42	0.05	0	0	0
Am_Tr_190576	1428	XP_026280845.1_myeloid leukemia factor 2 isoform X2 [Frankliniella occidentalis]	.	.	0	0	0.226667	0	0	0	0	0	0	0	0.38	0.3	0	0	0	0
Am_Tr_190577	272	.	.	.	0	0	2.89333	0	0	0	0	0	0	0	8.68	0	0	0	0	0
Am_Tr_190578	2020	KAE8748847.1_hypothetical protein FOCC_FOCC004441 [Frankliniella occidentalis]	.	IPR019376_Myeloid leukemia factor	0	0.04	2.03333	0	0	0	0	0	0.12	0	5.2	0.45	0.45	0	0	0
Am_Tr_190579	901	XP_014506826.2_putative E3 ubiquitin-protein ligase LIN-1 isoform X2 [Vigna radiata var. radiata]	.	.	0	0.273333	0.216667	0	0	0	0	0.14	0.68	0	0	0.53	0.12	0	0	0
Am_Tr_190580	944	RZC12142.1_hypothetical protein D0Y65_012090 [Glycine soja]	AT1G36990.1_C-jun-amino-terminal kinase-interacting protein	.	0	0.18	0.113333	0	0	0	0	0	0.42	0.12	0.11	0.12	0.11	0	0	0
Am_Tr_190581	966	RZC12142.1_hypothetical protein D0Y65_012090 [Glycine soja]	AT1G36990.1_C-jun-amino-terminal kinase-interacting protein	.	0	0.25	0	0	0	0	0	0.37	0.38	0	0	0	0	0	0	0
Am_Tr_190582	3815	XP_027191354.1_LOW QUALITY PROTEIN: putative E3 ubiquitin-protein ligase LIN-1 [Cicer arietinum]	AT1G49780.1_plant U-box 26, GeneName=PUB26	IPR036322_WD40-repeat-containing domain superfamily; IPR001680_WD40 repeat; IPR016024_Armadillo-type fold; IPR003613_U-box domain	0.01	0.0866667	0.0866667	0.0833333	0	0.03	0	0	0	0.26	0.07	0.1	0.09	0.2	0.05	0
Am_Tr_190583	4437	GAU11683.1_hypothetical protein TSUD_74330 [Trifolium subterraneum]	AT1G49780.1_plant U-box 26, GeneName=PUB26	IPR036322_WD40-repeat-containing domain superfamily; IPR001680_WD40 repeat; IPR003613_U-box domain; IPR016024_Armadillo-type fold	0	0.32	0.06	0.143333	0	0	0	0.09	0.45	0.42	0.13	0	0.05	0.06	0	0.37
Am_Tr_190584	219	.	.	.	2.8	0	0	0	0	0	8.4	0	0	0	0	0	0	0	0	0
Am_Tr_190585	402	.	.	.	0.146667	1.17667	0.803333	1.02	0	0	0.44	2.5	0.58	0.45	0.85	0.49	1.07	0.51	0.52	2.03
Am_Tr_190586	292	.	.	.	0	0	1.28667	0	0	0	0	0	0	0	0	2.24	1.62	0	0	0
Am_Tr_190587	247	MCI10475.1_reticulon-like protein B2 [Trifolium medium]	.	.	1.87333	0	0	0	0	0	5.62	0	0	0	0	0	0	0	0	0
Am_Tr_190588	346	.	.	.	2.86333	0.21	0	0	3.73	0.76	4.1	0	0	0.63	0	0	0	0	0	0
Am_Tr_190589	255	MCI10475.1_reticulon-like protein B2 [Trifolium medium]	.	.	0	0	1.11333	0	0	0	0	0	0	0	3.18	0	0.16	0	0	0
Am_Tr_190590	419	GAU26259.1_hypothetical protein TSUD_224500 [Trifolium subterraneum]	AT5G66360.1_Ribosomal RNA adenine dimethylase family protein, GeneName=DIM1B	.	0	0	0.266667	0	0	0	0	0	0	0	0.39	0	0.41	0	0	0
Am_Tr_190591	475	.	.	.	0.253333	0	0.103333	0	0.38	0.38	0	0	0	0	0.31	0	0	0	0	0
Am_Tr_190592	402	.	.	.	0.323333	0.796667	0	0.516667	0	0.53	0.44	1.5	0	0.89	0	0	0	0.51	1.04	0
Am_Tr_190593	802	GAU49374.1_hypothetical protein TSUD_252480 [Trifolium subterraneum]	.	.	0	0	0	0.273333	0	0	0	0	0	0	0	0	0	0.16	0.5	0.16
Am_Tr_190594	256	XP_013465261.3_myosin-11 [Medicago truncatula]	.	.	0	0	0.52	0	0	0	0	0	0	0	1.56	0	0	0	0	0
Am_Tr_190595	441	PNX88120.1_frigida-LIKE protein [Trifolium pratense]	.	.	0	0.16	1.00333	0	0	0	0	0	0.48	0	1.06	1.21	0.74	0	0	0
Am_Tr_190596	454	PNX65829.1_copia-type polyprotein [Trifolium pratense]	.	IPR012337_Ribonuclease H-like superfamily	0.386667	0	0.126667	0.136667	0.82	0	0.34	0	0	0	0	0.38	0	0	0.41	0
Am_Tr_190597	762	RYQ87637.1_hypothetical protein Ahy_B09g095159 [Arachis hypogaea]	.	.	0.973333	0.156667	1.03	0.503333	0.53	0.71	1.68	0.47	0	0	0.88	1.16	1.05	0	0.63	0.88
Am_Tr_190598	426	.	.	.	1.03667	0	0.143333	0	0	0	3.11	0	0	0	0	0.43	0	0	0	0
Am_Tr_190599	216	.	.	.	0	0	0	0	0	0	0	0	0	0	0	0	0	0	0	0
Am_Tr_190600	1716	XP_003046679.1_uncharacterized protein NECHADRAFT_58353 [Fusarium vanettenii 77-13-4] XP_046140245.1 kinase-like domain-containing protein [Fusarium solani] EEU40966.1 predicted protein [Fusarium vanettenii 77-13-4] KAH7275628.1 kinase-like domain-containing protein [Fusarium solani]	AT3G45640.1_mitogen-activated protein kinase 3, GeneName=MPK3	IPR000719_Protein kinase domain; IPR011009_Protein kinase-like domain superfamily; IPR008352_Mitogen-activated protein (MAP) kinase p38-like	1.75	0	0	0	0.45	1.35	3.45	0	0	0	0	0	0	0	0	0
Am_Tr_190601	722	PHH60699.1_hypothetical protein CDD80_1570 [Ophiocordyceps camponoti-rufipedis]	AT2G43790.1_MAP kinase 6, GeneName=MPK6	IPR011009_Protein kinase-like domain superfamily; IPR000719_Protein kinase domain	0	0	0	0	0	0	0	0	0	0	0	0	0	0	0	0
Am_Tr_190602	313	XP_018242102.1_CMGC/MAPK/P38 protein kinase [Fusarium oxysporum f. sp. lycopersici 4287] EXA47478.1 CMGC/MAPK/P38 protein kinase [Fusarium oxysporum f. sp. pisi HDV247] EXK35389.1 CMGC/MAPK/P38 protein kinase [Fusarium oxysporum f. sp. melonis 26406] EXK94210.1 CMGC/MAPK/P38 protein kinase [Fusarium oxysporum f. sp. raphani 54005] EXL89063.1 CMGC/MAPK/P38 protein kinase [Fusarium oxysporum f. sp.…	AT1G07880.1_Protein kinase superfamily protein, GeneName=ATMPK13	IPR000719_Protein kinase domain; IPR011009_Protein kinase-like domain superfamily	0.906667	0	0	0	0	1	1.72	0	0	0	0	0	0	0	0	0
Am_Tr_190603	228	XP_036588280.1_mitogen-activated protein kinase HOG1 [Colletotrichum truncatum] KAF6799653.1 mitogen-activated protein kinase HOG1 [Colletotrichum truncatum]	.	.	0	0	0	0	0	0	0	0	0	0	0	0	0	0	0	0
Am_Tr_190604	763	MCH96155.1_hypothetical protein [Trifolium medium]	ATMG00860.1_DNA/RNA polymerases superfamily protein, GeneName=ORF158	IPR041577_Reverse transcriptase/retrotransposon-derived protein, RNase H-like domain; IPR043502_DNA/RNA polymerase superfamily	0.226667	0	0.106667	0.176667	0.18	0.36	0.14	0	0	0	0	0.17	0.15	0.35	0.18	0
Am_Tr_190605	546	MCI12082.1_enzymatic polyprotein [Trifolium medium]	ATMG00860.1_DNA/RNA polymerases superfamily protein, GeneName=ORF158	IPR043502_DNA/RNA polymerase superfamily; IPR041577_Reverse transcriptase/retrotransposon-derived protein, RNase H-like domain	0	0	0	0	0	0	0	0	0	0	0	0	0	0	0	0
Am_Tr_190606	391	XP_045831357.1_uncharacterized protein K02A2.6-like [Trifolium pratense]	ATMG00860.1_DNA/RNA polymerases superfamily protein, GeneName=ORF158	IPR000477_Reverse transcriptase domain; IPR043502_DNA/RNA polymerase superfamily	0.186667	0	0	0.37	0.56	0	0	0	0	0	0	0	0	0	1.11	0
Am_Tr_190607	721	PNX81877.1_hypothetical protein L195_g037902, partial [Trifolium pratense]	.	IPR043502_DNA/RNA polymerase superfamily; IPR013103_Reverse transcriptase, RNA-dependent DNA polymerase	0.45	0.07	0	0	1.35	0	0	0	0.21	0	0	0	0	0	0	0
Am_Tr_190608	1196	XP_026274730.1_AT-rich interactive domain-containing protein 4B-like isoform X2 [Frankliniella occidentalis]	.	.	0	0.03	0.333333	0	0	0	0	0	0	0.09	0.58	0.09	0.33	0	0	0
Am_Tr_190609	939	KAE8751451.1_hypothetical protein FOCC_FOCC001698 [Frankliniella occidentalis]	.	.	0	0	0.406667	0	0	0	0	0	0	0	0.99	0	0.23	0	0	0
Am_Tr_190610	1484	.	.	.	0	0	0.793333	0	0	0	0	0	0	0	0	0	2.38	0	0	0
Am_Tr_190611	630	XP_024625434.2_uncharacterized protein LOC112416305 isoform X3 [Medicago truncatula]	.	.	0	0	0.48	0	0	0	0	0	0	0	0.64	0	0.8	0	0	0
Am_Tr_190612	653	XP_024625434.2_uncharacterized protein LOC112416305 isoform X3 [Medicago truncatula]	.	.	0	0	0.866667	0	0	0	0	0	0	0	1.77	0.83	0	0	0	0
Am_Tr_190613	247	PNY03949.1_ATP-dependent DNA helicase PIF1 [Trifolium pratense]	.	.	0	0	1.21333	0	0	0	0	0	0	0	3.64	0	0	0	0	0
Am_Tr_190614	265	.	.	.	0	0	1.50667	0	0	0	0	0	0	0	1.37	3.15	0	0	0	0
Am_Tr_190615	5319	XP_026276893.1_apoptotic chromatin condensation inducer in the nucleus-like isoform X1 [Frankliniella occidentalis]	AT4G39680.2_SAP domain-containing protein	IPR032552_Acin1, RNSP1-SAP18 binding (RSB) motif	0	0	0.426667	0	0	0	0	0	0	0	1.14	0	0.14	0	0	0
Am_Tr_190616	5297	XP_026276894.1_apoptotic chromatin condensation inducer in the nucleus-like isoform X2 [Frankliniella occidentalis]	AT4G39680.2_SAP domain-containing protein	IPR032552_Acin1, RNSP1-SAP18 binding (RSB) motif; IPR035979_RNA-binding domain superfamily	0	0.09	0.993333	0	0	0	0	0	0.1	0.17	2.2	0.48	0.3	0	0	0
Am_Tr_190617	548	GBP88530.1_Putative uncharacterized protein ART2 [Eumeta japonica]	.	.	0.48	0	0	0	0	0	1.44	0	0	0	0	0	0	0	0	0
Am_Tr_190618	295	KDQ32286.1_hypothetical protein PLEOSDRAFT_22346, partial [Pleurotus ostreatus PC15]	.	.	0	0	0	3.71333	0	0	0	0	0	0	0	0	0	11.14	0	0
Am_Tr_190619	697	XP_003370102.1_conserved hypothetical protein, partial [Trichinella spiralis]	.	.	0	0.0633333	0	0.27	0	0	0	0.19	0	0	0	0	0	0	0.41	0.4
Am_Tr_190620	245	.	.	.	0	0.926667	0	2.24333	0	0	0	0	2.78	0	0	0	0	0	4.56	2.17
Am_Tr_190621	229	.	.	.	0	0	0	0	0	0	0	0	0	0	0	0	0	0	0	0
Am_Tr_190622	1381	XP_003051155.1_uncharacterized protein NECHADRAFT_100513 [Fusarium vanettenii 77-13-4] XP_046134278.1 anticodon-binding protein [Fusarium solani] EEU45442.1 predicted protein [Fusarium vanettenii 77-13-4] KAH7266479.1 anticodon-binding protein [Fusarium solani]	AT1G63780.1_Ribosomal RNA processing Brix domain protein, GeneName=IMP4	IPR007109_Brix domain	0.92	0	0	0	0	0.62	2.14	0	0	0	0	0	0	0	0	0
Am_Tr_190623	480	XP_025590537.1_uncharacterized protein FVRRES_03332 [Fusarium venenatum] KAG8353480.1 U3 small nucleolar ribonucleoprotein IMP4 [Fusarium venenatum] KAH7003640.1 anticodon-binding protein [Fusarium venenatum] CEI66820.1 unnamed protein product [Fusarium venenatum]	AT1G63780.1_Ribosomal RNA processing Brix domain protein, GeneName=IMP4	.	0.476667	0	0	0	0	0.58	0.85	0	0	0	0	0	0	0	0	0
Am_Tr_190624	623	.	AT4G37040.1_methionine aminopeptidase 1D, GeneName=MAP1D	.	0.543333	0.783333	0.206667	0.55	1.2	0.24	0.19	0.69	1.04	0.62	0.2	0.22	0.2	0.7	0.24	0.71
Am_Tr_190625	668	.	.	.	0	0	0	0	0	0	0	0	0	0	0	0	0	0	0	0
Am_Tr_190626	681	MCI03910.1_TMV resistance protein N-like [Trifolium medium]	AT1G72920.1_Toll-Interleukin-Resistance (TIR) domain family protein	.	2.19667	4.84	4.91333	2.22333	2.3	2.93	1.36	4.4	6.16	3.96	2.06	7.2	5.48	0.82	3.99	1.86
Am_Tr_190627	1182	.	.	.	0	0.53	0.0633333	0.0666667	0	0	0	0.52	0.63	0.44	0	0.19	0	0.1	0.1	0
Am_Tr_190628	766	.	.	.	0	0.843333	0.0533333	0	0	0	0	0	2.53	0	0	0.16	0	0	0	0
Am_Tr_190629	2641	MCH79686.1_retrovirus-related Pol polyprotein from transposon TNT 1-94 [Trifolium medium]	AT1G21280.1_Copia-like polyprotein/retrotransposon	IPR005162_Retrotransposon gag domain; IPR025724_GAG-pre-integrase domain; IPR029472_Retrotransposon Copia-like, N-terminal	0.0133333	0.64	0.0433333	0.08	0	0.04	0	0.71	0	1.21	0.1	0	0.03	0.12	0	0.12
Am_Tr_190630	623	MCI03910.1_TMV resistance protein N-like [Trifolium medium]	AT4G12010.1_Disease resistance protein (TIR-NBS-LRR class) family	.	0.143333	2.21	0.0666667	0.08	0.24	0	0.19	4.12	2.3	0.21	0	0	0.2	0	0	0.24
Am_Tr_190631	1445	XP_027368764.1_auxin-responsive protein IAA33 [Abrus precatorius]	AT5G57420.1_indole-3-acetic acid inducible 33, GeneName=IAA33	IPR033389_AUX/IAA domain	0.193333	2.22667	2.88667	0.71	0.39	0	0.19	1.51	3.26	1.91	3.71	2.5	2.45	0.7	0.72	0.71
Am_Tr_190632	240	XP_045809709.1_uncharacterized protein LOC123904058 [Trifolium pratense]	.	.	0.88	0.72	0.8	0	2.64	0	0	0	0	2.16	0	2.4	0	0	0	0
Am_Tr_190633	1816	MCH79686.1_retrovirus-related Pol polyprotein from transposon TNT 1-94 [Trifolium medium]	.	IPR025724_GAG-pre-integrase domain	0	0	0	0	0	0	0	0	0	0	0	0	0	0	0	0
Am_Tr_190634	1506	PNY16454.1_flavonol sulfotransferase-like protein [Trifolium pratense]	.	.	0	0	0	0	0	0	0	0	0	0	0	0	0	0	0	0
Am_Tr_190635	943	XP_036575051.1_coatomer beta subunit [Colletotrichum truncatum] KAF6781561.1 coatomer beta subunit [Colletotrichum truncatum]	AT4G31480.1_Coatomer, beta subunit	IPR011710_Coatomer beta subunit, C-terminal; IPR029446_Coatomer beta subunit, appendage platform domain	0.94	0	0	0	0	0.67	2.15	0	0	0	0	0	0	0	0	0
Am_Tr_190636	1486	GJC80512.1_coatomer subunit beta [Colletotrichum spaethianum]	AT4G31490.2_Coatomer, beta subunit	IPR029446_Coatomer beta subunit, appendage platform domain; IPR011710_Coatomer beta subunit, C-terminal	0	0	0.436667	0	0	0	0	0	0	0	0.82	0.43	0.06	0	0	0
Am_Tr_190637	259	.	.	.	0	0	0	0	0	0	0	0	0	0	0	0	0	0	0	0
Am_Tr_190638	360	.	.	.	0	0	0.183333	0.873333	0	0	0	0	0	0	0.55	0	0	1.3	0.67	0.65
Am_Tr_190639	920	.	.	.	0.78	0.633333	0.35	0.183333	0.55	1.24	0.55	0.92	0.15	0.83	0.34	0.13	0.58	0.14	0.14	0.27
Am_Tr_190640	316	.	.	.	2.76667	1.82333	4.20333	1.85	2.87	2.93	2.5	0.91	2.15	2.41	1.54	5.27	5.8	0	3.74	1.81
Am_Tr_190641	413	.	.	.	0.166667	2.18333	0.743333	0.96	0.5	0	0	2.84	3.29	0.42	0	1.38	0.85	0.48	0	2.4
Am_Tr_190642	804	.	.	.	0	0.156667	0.383333	0.166667	0	0	0	0.47	0	0	0.14	0.31	0.7	0.33	0.17	0
Am_Tr_190643	344	.	.	.	0.253333	0.426667	0.216667	0.24	0.76	0	0	0	0	1.28	0	0	0.65	0	0	0.72
Am_Tr_190644	446	.	.	.	0	0	0	0	0	0	0	0	0	0	0	0	0	0	0	0
Am_Tr_190645	787	.	.	.	0.0566667	0.206667	0.0966667	0.166667	0.17	0	0	0.33	0	0.29	0	0	0.29	0	0	0.5
Am_Tr_190646	691	.	.	.	0.0666667	0.06	0.0566667	0.136667	0	0.2	0	0	0	0.18	0	0	0.17	0	0.21	0.2
Am_Tr_190647	230	.	.	.	1.09	0	0	0	3.27	0	0	0	0	0	0	0	0	0	0	0
Am_Tr_190648	464	.	.	.	0	0.223333	0.343333	0.126667	0	0	0	0	0	0.67	0	0.36	0.67	0.38	0	0
Am_Tr_190649	204	.	.	.	0	0	0	0	0	0	0	0	0	0	0	0	0	0	0	0
Am_Tr_190650	406	.	.	.	0.17	0	0.14	0.17	0.51	0	0	0	0	0	0.42	0	0	0	0.51	0
Am_Tr_190651	720	.	.	.	0	0.123333	0.396667	0.13	0	0	0	0.37	0	0	0	0.54	0.65	0	0.39	0
Am_Tr_190652	306	.	.	.	0	0	0	0	0	0	0	0	0	0	0	0	0	0	0	0
Am_Tr_190653	250	.	.	.	6.33667	3	0	0.57	6.54	2.08	10.39	2.14	5.06	1.8	0	0	0	1.71	0	0
Am_Tr_190654	415	.	.	.	0.163333	0	0	0	0.49	0	0	0	0	0	0	0	0	0	0	0
Am_Tr_190655	309	.	.	.	0	0.286667	0	0	0	0	0	0	0	0.86	0	0	0	0	0	0
Am_Tr_190656	345	.	.	.	0	0	0	0	0	0	0	0	0	0	0	0	0	0	0	0
Am_Tr_190657	1098	XP_003052815.1_uncharacterized protein NECHADRAFT_36533 [Fusarium vanettenii 77-13-4] EEU47102.1 hypothetical protein NECHADRAFT_36533 [Fusarium vanettenii 77-13-4]	.	IPR001138_Zn(2)-C6 fungal-type DNA-binding domain; IPR036864_Zn(2)-C6 fungal-type DNA-binding domain superfamily	0.506667	0	0	0	0	0.55	0.97	0	0	0	0	0	0	0	0	0
Am_Tr_190658	280	.	.	.	0	0	0	0	0	0	0	0	0	0	0	0	0	0	0	0
Am_Tr_190659	667	.	.	.	0	0	0.316667	0	0	0	0	0	0	0	0.75	0.2	0	0	0	0
Am_Tr_190660	705	.	.	.	0	0	0.15	0	0	0	0	0	0	0	0.45	0	0	0	0	0
Am_Tr_190661	391	.	.	.	0	0	0.15	0.736667	0	0	0	0	0	0	0.45	0	0	0	2.21	0
Am_Tr_190662	265	.	.	.	0	2.08333	0	0	0	0	0	0	1.97	4.28	0	0	0	0	0	0
Am_Tr_190663	334	.	.	.	0	0	0	0	0	0	0	0	0	0	0	0	0	0	0	0
Am_Tr_190664	402	PQM34381.1_valine--tRNA ligase mitochondrial 1-like [Prunus yedoensis var. nudiflora]	AT1G14610.1_valyl-tRNA synthetase / valine-tRNA ligase (VALRS), GeneName=TWN2	.	0.643333	0.316667	0	0	1.05	0	0.88	0.5	0	0.45	0	0	0	0	0	0
Am_Tr_190665	250	.	.	.	1.46	0	0	0	4.38	0	0	0	0	0	0	0	0	0	0	0
Am_Tr_190666	214	.	.	.	0	0	0	2.87	0	0	0	0	0	0	0	0	0	0	0	8.61
Am_Tr_190667	341	.	.	.	0.483333	0	0.236667	0	0.78	0	0.67	0	0	0	0	0.71	0	0	0	0
Am_Tr_190668	664	XP_046140497.1_pectin lyase fold/virulence factor [Fusarium solani] KAH7275880.1 pectin lyase fold/virulence factor [Fusarium solani]	AT3G55140.2_Pectin lyase-like superfamily protein	IPR011050_Pectin lyase fold/virulence factor; IPR002022_Pectate lyase	0	0	0	0.143333	0	0	0	0	0	0	0	0	0	0	0	0.43
Am_Tr_190669	1264	XP_003046791.1_uncharacterized protein NECHADRAFT_58553 [Fusarium vanettenii 77-13-4] EEU41078.1 hypothetical protein NECHADRAFT_58553 [Fusarium vanettenii 77-13-4]	AT3G55140.2_Pectin lyase-like superfamily protein	IPR002022_Pectate lyase; IPR011050_Pectin lyase fold/virulence factor	3.29333	0	0	0	0	0.18	9.7	0	0	0	0	0	0	0	0	0
Am_Tr_190670	512	XP_036589924.1_pectate lyase [Colletotrichum truncatum] KAF6801929.1 pectate lyase [Colletotrichum truncatum]	.	IPR002022_Pectate lyase; IPR011050_Pectin lyase fold/virulence factor	0	0	0.47	0	0	0	0	0	0	0	0.54	0.31	0.56	0	0	0
Am_Tr_190671	652	XP_003041570.1_polysaccharide lyase family 1 [Fusarium vanettenii 77-13-4] EEU35857.1 polysaccharide lyase family 1 [Fusarium vanettenii 77-13-4]	AT3G09540.1_Pectin lyase-like superfamily protein	IPR002022_Pectate lyase; IPR011050_Pectin lyase fold/virulence factor	0.586667	0	0	0	0	0.67	1.09	0	0	0	0	0	0	0	0	0
Am_Tr_190672	260	.	.	.	0	0	0	0	0	0	0	0	0	0	0	0	0	0	0	0
Am_Tr_190673	862	MCH81248.1_CC-NBS-LRR resistance protein [Trifolium medium]	.	.	0	0.0866667	0.126667	0.396667	0	0	0	0	0	0.26	0	0	0.38	0.15	0	1.04
Am_Tr_190674	3993	AES68918.1_disease resistance protein (CC-NBS-LRR class) family protein [Medicago truncatula]	AT3G14470.1_NB-ARC domain-containing disease resistance protein	.	0	0	0	0	0	0	0	0	0	0	0	0	0	0	0	0
Am_Tr_190675	2312	XP_045815632.1_putative disease resistance RPP13-like protein 1 [Trifolium pratense]	AT3G14470.1_NB-ARC domain-containing disease resistance protein	IPR002182_NB-ARC; IPR027417_P-loop containing nucleoside triphosphate hydrolase	0.03	0	0	0	0.05	0	0.04	0	0	0	0	0	0	0	0	0
Am_Tr_190676	660	GAU15285.1_hypothetical protein TSUD_03520 [Trifolium subterraneum]	.	.	0.356667	0	0	0	0	0	1.07	0	0	0	0	0	0	0	0	0
Am_Tr_190677	2379	PNY10806.1_histone deacetylase [Trifolium pratense]	.	IPR012337_Ribonuclease H-like superfamily; IPR025724_GAG-pre-integrase domain	0.0133333	0	0	0	0.04	0	0	0	0	0	0	0	0	0	0	0
Am_Tr_190678	499	MCH81248.1_CC-NBS-LRR resistance protein [Trifolium medium]	.	.	0	0.1	0.376667	0	0	0	0	0	0	0.3	1.13	0	0	0	0	0
Am_Tr_190679	1058	.	.	.	1.3	0.48	0.79	3.82	0.23	2.63	1.04	0.77	0.18	0.49	0.86	0.48	1.03	2.31	8.05	1.1
Am_Tr_190680	1269	.	.	.	1.16	0.246667	0.113333	2.88	1.53	0.89	1.06	0	0.13	0.61	0	0.16	0.18	1.6	4.14	2.9
Am_Tr_190681	1752	.	.	.	0.25	0.0533333	0.24	2.38667	0.09	0.59	0.07	0	0.08	0.08	0.21	0.51	0	0.75	4.61	1.8
Am_Tr_190682	225	.	.	.	0	0	0	0	0	0	0	0	0	0	0	0	0	0	0	0
Am_Tr_190683	307	.	.	.	0.353333	0.95	0.3	3.69333	0	1.06	0	1.98	0	0.87	0	0	0.9	0.99	8.13	1.96
Am_Tr_190684	1197	.	.	.	0.356667	0	0.03	0.1	0	0.59	0.48	0	0	0	0	0.09	0	0.2	0.1	0
Am_Tr_190685	374	.	.	.	0	0.403333	0.533333	0	0	0	0	0	0.69	0.52	0.5	0.57	0.53	0	0	0
Am_Tr_190686	242	.	.	.	0	0	0	0	0	0	0	0	0	0	0	0	0	0	0	0
Am_Tr_190687	213	.	.	.	0	0	0	0	0	0	0	0	0	0	0	0	0	0	0	0
Am_Tr_190688	231	.	.	.	0	0	0	0	0	0	0	0	0	0	0	0	0	0	0	0
Am_Tr_190689	650	KAF3049217.1_hypothetical protein E8E11_005660 [Didymella keratinophila]	.	.	0	0.07	0	0.22	0	0	0	0.21	0	0	0	0	0	0.66	0	0
Am_Tr_190690	392	XP_003047145.1_uncharacterized protein NECHADRAFT_46439, partial [Fusarium vanettenii 77-13-4] EEU41432.1 hypothetical protein NECHADRAFT_46439, partial [Fusarium vanettenii 77-13-4]	.	IPR013530_Protein-arginine deiminase, C-terminal	0.313333	0	0	0	0	0	0.94	0	0	0	0	0	0	0	0	0
Am_Tr_190691	220	XP_046131631.1_uncharacterized protein B0J15DRAFT_465811 [Fusarium solani] KAH7258554.1 hypothetical protein B0J15DRAFT_465811 [Fusarium solani]	.	.	2.72333	0	0	0	0	0	8.17	0	0	0	0	0	0	0	0	0
Am_Tr_190692	297	XP_003047145.1_uncharacterized protein NECHADRAFT_46439, partial [Fusarium vanettenii 77-13-4] EEU41432.1 hypothetical protein NECHADRAFT_46439, partial [Fusarium vanettenii 77-13-4]	.	.	0.68	0	0	0	0	0	2.04	0	0	0	0	0	0	0	0	0
Am_Tr_190693	1118	PNX89536.1_gag-pol polyprotein [Trifolium pratense]	.	IPR041577_Reverse transcriptase/retrotransposon-derived protein, RNase H-like domain; IPR043502_DNA/RNA polymerase superfamily	0	0.32	0	0.216667	0	0	0	0.1	0.58	0.28	0	0	0	0	0.65	0
Am_Tr_190694	392	.	.	.	0	0.333333	0	0.73	0	0	0	0.53	0	0.47	0	0	0	0	1.65	0.54
Am_Tr_190695	1024	XP_018164319.1_Proteasome subunit beta type [Colletotrichum higginsianum IMI 349063] XP_035335302.1 proteasome component PUP3 [Colletotrichum scovillei] TDZ27206.1 Proteasome subunit beta type-3 [Colletotrichum spinosum] TDZ74334.1 Proteasome subunit beta type-3 [Colletotrichum trifolii] TEA16399.1 Proteasome subunit beta type-3 [Colletotrichum sidae] TID05063.1 Proteasome subunit beta type-3 [Co…	AT1G21720.1_proteasome beta subunit C1, GeneName=PBC1	IPR001353_Proteasome, subunit alpha/beta; IPR029055_Nucleophile aminohydrolases, N-terminal	0	0	1.12333	0	0	0	0	0	0	0	1.78	0.78	0.81	0	0	0
Am_Tr_190696	879	XP_003054110.1_uncharacterized protein NECHADRAFT_57213 [Fusarium vanettenii 77-13-4] RMJ10800.1 Proteasome subunit beta type-3 [Fusarium kuroshium] RSL63500.1 Proteasome subunit beta type-3 [Fusarium sp. AF-6] RSL70579.1 Proteasome subunit beta type-3 [Fusarium sp. AF-8] RSL76593.1 Proteasome subunit beta type-3 [Fusarium floridanum] RSM00777.1 Proteasome subunit beta type-3 [Fusarium ambrosium]…	AT1G21720.1_proteasome beta subunit C1, GeneName=PBC1	IPR029055_Nucleophile aminohydrolases, N-terminal; IPR001353_Proteasome, subunit alpha/beta	0.866667	0	0	0	0	0	2.6	0	0	0	0	0	0	0	0	0
Am_Tr_190697	1005	.	.	.	0.116667	1.21667	0.926667	0.943333	0.25	0	0.1	0.71	0.93	2.01	0	1.03	1.75	0.24	1.49	1.1
Am_Tr_190698	358	.	.	.	0	0	0	0.886667	0	0	0	0	0	0	0	0	0	1.98	0.68	0
Am_Tr_190699	320	.	.	.	0	0.256667	0.266667	0.583333	0	0	0	0	0	0.77	0	0	0.8	0	0	1.75
Am_Tr_190700	395	.	.	.	0	0.173333	0.456667	0	0	0	0	0.52	0	0	0.44	0	0.93	0	0	0
Am_Tr_190701	819	.	.	.	0	0.05	0.1	0.16	0	0	0	0	0	0.15	0	0.15	0.15	0	0.32	0.16
Am_Tr_190702	241	.	.	.	0	0.706667	0	0	0	0	0	0	0	2.12	0	0	0	0	0	0
Am_Tr_190703	398	.	.	.	0	0	0.153333	0	0	0	0	0	0	0	0	0	0.46	0	0	0
Am_Tr_190704	233	.	.	.	0	0	3.70333	1.92	0	0	0	0	0	0	0	11.11	0	0	5.76	0
Am_Tr_190705	214	.	.	.	1.63	0	0	0	0	0	4.89	0	0	0	0	0	0	0	0	0
Am_Tr_190706	425	.	.	.	0.39	0	0.143333	0	0	0	1.17	0	0	0	0	0.43	0	0	0	0
Am_Tr_190707	264	.	.	.	0	0	0.513333	0	0	0	0	0	0	0	0	0	1.54	0	0	0
Am_Tr_190708	402	.	.	.	0	0	0.71	0	0	0	0	0	0	0	2.13	0	0	0	0	0
Am_Tr_190709	676	KAE8745068.1_hypothetical protein FOCC_FOCC008319 [Frankliniella occidentalis]	.	.	0	0	0.356667	0	0	0	0	0	0	0	0.87	0.2	0	0	0	0
Am_Tr_190710	2059	GAU48831.1_hypothetical protein TSUD_190610 [Trifolium subterraneum]	AT3G06778.1_Chaperone DnaJ-domain superfamily protein	.	0.0266667	0	0	0	0	0	0.08	0	0	0	0	0	0	0	0	0
Am_Tr_190711	282	XP_016493511.1_PREDICTED: J protein JJJ2-like [Nicotiana tabacum]	AT3G06778.1_Chaperone DnaJ-domain superfamily protein	.	0.456667	0	0	0	1.37	0	0	0	0	0	0	0	0	0	0	0
Am_Tr_190712	1746	GAU48831.1_hypothetical protein TSUD_190610 [Trifolium subterraneum]	.	.	0.276667	0.0366667	0	0	0.7	0.13	0	0.06	0	0.05	0	0	0	0	0	0
Am_Tr_190713	649	.	.	.	0	0	0.246667	0	0	0	0	0	0	0	0.55	0	0.19	0	0	0
Am_Tr_190714	360	.	.	.	0	0	0.386667	0	0	0	0	0	0	0	0	0	1.16	0	0	0
Am_Tr_190715	644	.	.	.	0	0	0.63	0	0	0	0	0	0	0	1.31	0	0.58	0	0	0
Am_Tr_190716	2012	XP_046137090.1_P-loop containing nucleoside triphosphate hydrolase protein [Fusarium solani] KAH7272473.1 P-loop containing nucleoside triphosphate hydrolase protein [Fusarium solani]	AT1G04170.1_eukaryotic translation initiation factor 2 gamma subunit, GeneName=EIF2 GAMMA	IPR004161_Translation elongation factor EFTu-like, domain 2; IPR009000_Translation protein, beta-barrel domain superfamily; IPR000795_Translational (tr)-type GTP-binding domain; IPR015256_Initiation factor eIF2 gamma, C-terminal; IPR027417_P-loop containing nucleoside triphosphate hydrolase; IPR009001_Translation elongation factor EF1A/initiation factor IF2gamma, C-terminal	0.946667	0	0	0	0.05	0.21	2.58	0	0	0	0	0	0	0	0	0
Am_Tr_190717	563	KAE9044941.1_Eukaryotic translation initiation factor 2 subunit 3 [Phytophthora rubi] KAE9051439.1 Eukaryotic translation initiation factor 2 subunit 3 [Phytophthora rubi] KAE9356153.1 Eukaryotic translation initiation factor 2 subunit 3 [Phytophthora rubi]	AT1G04170.1_eukaryotic translation initiation factor 2 gamma subunit, GeneName=EIF2 GAMMA	IPR000795_Translational (tr)-type GTP-binding domain; IPR027417_P-loop containing nucleoside triphosphate hydrolase	0.776667	0	0	0	0.56	0.85	0.92	0	0	0	0	0	0	0	0	0
Am_Tr_190718	2056	XP_035335260.1_eukaryotic translation initiation factor 2 subunit gamma [Colletotrichum scovillei] KXH39415.1 eukaryotic translation initiation factor 2 subunit gamma [Colletotrichum simmondsii] KXH45460.1 eukaryotic translation initiation factor 2 subunit gamma [Colletotrichum nymphaeae SA-01] KAF4782257.1 eukaryotic translation initiation factor 2 subunit gamma [Colletotrichum scovillei] KAG705…	AT1G04170.1_eukaryotic translation initiation factor 2 gamma subunit, GeneName=EIF2 GAMMA	IPR000795_Translational (tr)-type GTP-binding domain; IPR015256_Initiation factor eIF2 gamma, C-terminal; IPR009000_Translation protein, beta-barrel domain superfamily; IPR027417_P-loop containing nucleoside triphosphate hydrolase; IPR009001_Translation elongation factor EF1A/initiation factor IF2gamma, C-terminal; IPR004161_Translation elongation factor EFTu-like, domain 2	0	0	0.226667	0.0166667	0	0	0	0	0	0	0.22	0.15	0.31	0	0	0.05
Am_Tr_190719	1284	GJC84054.1_eukaryotic translation initiation factor 2 subunit gamma [Colletotrichum spaethianum]	AT1G04170.1_eukaryotic translation initiation factor 2 gamma subunit, GeneName=EIF2 GAMMA	IPR009001_Translation elongation factor EF1A/initiation factor IF2gamma, C-terminal; IPR004161_Translation elongation factor EFTu-like, domain 2; IPR027417_P-loop containing nucleoside triphosphate hydrolase; IPR009000_Translation protein, beta-barrel domain superfamily; IPR015256_Initiation factor eIF2 gamma, C-terminal	0	0	1.29	0	0	0	0	0	0	0	2.77	0.34	0.76	0	0	0
Am_Tr_190720	928	.	.	.	0	0.326667	0.17	0.183333	0	0	0	0.39	0	0.59	0	0.51	0	0	0.55	0
Am_Tr_190721	788	.	.	.	0.43	0	0.19	0.613333	0.17	0.85	0.27	0	0	0	0.14	0	0.43	1.34	0	0.5
Am_Tr_190722	243	.	.	.	0	0	0	0	0	0	0	0	0	0	0	0	0	0	0	0
Am_Tr_190723	393	XP_018336817.1_RNA-binding protein Musashi homolog Rbp6-like, partial [Agrilus planipennis]	.	.	0	0	0.746667	0	0	0	0	0	0	0	2.24	0	0	0	0	0
Am_Tr_190724	822	XP_022905421.1_RNA-binding protein Musashi homolog Rbp6 isoform X5 [Onthophagus taurus]	AT5G55550.1_RNA-binding (RRM/RBD/RNP motifs) family protein	IPR000504_RNA recognition motif domain; IPR035979_RNA-binding domain superfamily	0	0	0.226667	0	0	0	0	0	0	0	0.68	0	0	0	0	0
Am_Tr_190725	751	XP_034241254.1_RNA-binding protein Musashi homolog Rbp6 isoform X3 [Thrips palmi]	AT5G55550.1_RNA-binding (RRM/RBD/RNP motifs) family protein	IPR035979_RNA-binding domain superfamily; IPR000504_RNA recognition motif domain	0	0	0.19	0	0	0	0	0	0	0	0.57	0	0	0	0	0
Am_Tr_190726	248	XP_034241255.1_RNA-binding protein Musashi homolog Rbp6 isoform X4 [Thrips palmi]	.	.	0	0	1.33667	0	0	0	0	0	0	0	0	0	4.01	0	0	0
Am_Tr_190727	350	.	.	.	0.206667	0.77	0.196667	1.40333	0	0	0.62	0.69	1.62	0	0.59	0	0	1.39	1.43	1.39
Am_Tr_190728	3153	GAU43383.1_hypothetical protein TSUD_254660 [Trifolium subterraneum]	AT4G35270.4_Plant regulator RWP-RK family protein	IPR003035_RWP-RK domain; IPR000270_PB1 domain	0.266667	0.01	0.02	0.143333	0.23	0.07	0.5	0.03	0	0	0	0.03	0.03	0.33	0	0.1
Am_Tr_190729	689	XP_027351271.1_putative receptor protein kinase ZmPK1 [Abrus precatorius]	.	IPR000858_S-locus glycoprotein domain	0.0566667	0.0666667	0.936667	0	0	0	0.17	0.2	0	0	0.68	0.57	1.56	0	0	0
Am_Tr_190730	221	KAF2824750.1_hypothetical protein CC86DRAFT_371286 [Ophiobolus disseminans]	.	.	0	0	0	0	0	0	0	0	0	0	0	0	0	0	0	0
Am_Tr_190731	682	KAG5097804.1_hypothetical protein JHK82_047658 [Glycine max]	.	.	0.16	0	0.24	0	0.21	0.27	0	0	0	0	0	0.19	0.53	0	0	0
Am_Tr_190732	618	.	.	.	0.22	0.0866667	0.3	0.16	0	0.66	0	0	0.26	0	0	0.9	0	0.24	0.24	0
Am_Tr_190733	459	KAG8432972.1_hypothetical protein GDO86_017297 [Hymenochirus boettgeri]	AT1G07770.1_ribosomal protein S15A, GeneName=RPS15A	IPR000630_Ribosomal protein S8; IPR035987_Ribosomal protein S8 superfamily	0	0.23	0	0.523333	0	0	0	0	0	0.69	0	0	0	1.57	0	0
Am_Tr_190734	412	TYZ62272.1_hypothetical protein PybrP1_011391 [Pythium brassicum]	AT1G07770.1_ribosomal protein S15A, GeneName=RPS15A	IPR035987_Ribosomal protein S8 superfamily; IPR000630_Ribosomal protein S8	0.166667	0	0	0.966667	0	0.5	0	0	0	0	0	0	0	0.97	0	1.93
Am_Tr_190735	215	QJQ35670.1_cytochrome b [Acrobeloides varius]	.	.	1.66333	0	0	0	0	4.99	0	0	0	0	0	0	0	0	0	0
Am_Tr_190736	1169	QJQ35670.1_cytochrome b [Acrobeloides varius]	AT2G07727.1_cytochrome b	IPR016174_Di-haem cytochrome, transmembrane; IPR005797_Cytochrome b/b6, N-terminal	1.37	0	0	0	0.1	3.85	0.16	0	0	0	0	0	0	0	0	0
Am_Tr_190737	1620	XP_045799962.1_uncharacterized protein LOC123894109 [Trifolium pratense]	.	.	0	1.13333	0.263333	0.343333	0	0	0	0.82	0.52	2.06	0.34	0.13	0.32	0.48	0.21	0.34
Am_Tr_190738	1515	.	.	.	0	0.41	0.116667	0.343333	0	0	0	0.18	0.24	0.81	0	0	0.35	0.66	0.15	0.22
Am_Tr_190739	1227	XP_026280478.1_male-specific lethal 1-like 1 isoform X2 [Frankliniella occidentalis]	.	IPR029332_PEHE domain	0	0	0.713333	0	0	0	0	0	0	0	1.58	0	0.56	0	0	0
Am_Tr_190740	462	.	.	.	0	0	0.433333	0	0	0	0	0	0	0	1.3	0	0	0	0	0
Am_Tr_190741	407	.	.	.	0	0.19	0.146667	0.33	0	0	0	0	0.57	0	0	0	0.44	0.99	0	0
Am_Tr_190742	639	RKL25686.1_AP-1 complex subunit mu-1 [Fusarium oxysporum]	AT1G60780.1_Clathrin adaptor complexes medium subunit family protein, GeneName=HAP13	IPR011012_Longin-like domain superfamily; IPR028565_Mu homology domain; IPR022775_AP complex, mu/sigma subunit; IPR001392_Clathrin adaptor, mu subunit; IPR036168_AP-2 complex subunit mu, C-terminal superfamily	0.373333	0	0	0	0	0	1.12	0	0	0	0	0	0	0	0	0
Am_Tr_190743	519	CRK48720.1_hypothetical protein BN1723_008167 [Verticillium longisporum]	AT1G60780.1_Clathrin adaptor complexes medium subunit family protein, GeneName=HAP13	IPR001392_Clathrin adaptor, mu subunit; IPR036168_AP-2 complex subunit mu, C-terminal superfamily; IPR011012_Longin-like domain superfamily; IPR022775_AP complex, mu/sigma subunit; IPR028565_Mu homology domain	0	0	0.623333	0	0	0	0	0	0	0	1.05	0	0.82	0	0	0
Am_Tr_190744	1224	.	.	.	0.0333333	0.0566667	0.106667	0.223333	0	0.1	0	0.09	0	0.08	0	0	0.32	0.28	0.1	0.29
Am_Tr_190745	824	XP_025651312.1_transmembrane protein 45A-like [Arachis hypogaea] XP_025651313.1 transmembrane protein 45A-like [Arachis hypogaea] XP_025651314.1 transmembrane protein 45A-like [Arachis hypogaea] XP_025697966.1 transmembrane protein 45A-like [Arachis hypogaea] XP_025697967.1 transmembrane protein 45A-like [Arachis hypogaea] XP_025697968.1 transmembrane protein 45A-like [Arachis hypogaea] QHO40090.…	AT1G32127.2_plant viral-response family protein	.	0	0.343333	0.336667	0.863333	0	0	0	0.73	0.3	0	0.61	0.4	0	0.77	1.45	0.37
Am_Tr_190746	440	.	.	.	0	0.57	0.123333	0.14	0	0	0	0.84	0.13	0.74	0	0	0.37	0	0	0.42
Am_Tr_190747	562	XP_025651312.1_transmembrane protein 45A-like [Arachis hypogaea] XP_025651313.1 transmembrane protein 45A-like [Arachis hypogaea] XP_025651314.1 transmembrane protein 45A-like [Arachis hypogaea] XP_025697966.1 transmembrane protein 45A-like [Arachis hypogaea] XP_025697967.1 transmembrane protein 45A-like [Arachis hypogaea] XP_025697968.1 transmembrane protein 45A-like [Arachis hypogaea] QHO40090.…	AT1G32127.2_plant viral-response family protein	.	0.0933333	0.64	1.04667	0.156667	0	0.28	0	1.13	0.31	0.48	0.55	1.4	1.19	0.3	0	0.17
Am_Tr_190748	284	KYP75432.1_Beta-hexosaminidase subunit B2 [Cajanus cajan]	AT3G55260.1_beta-hexosaminidase 1, GeneName=HEXO1	.	0.446667	0	0	0	1.34	0	0	0	0	0	0	0	0	0	0	0
Am_Tr_190749	426	KYP75432.1_Beta-hexosaminidase subunit B2 [Cajanus cajan]	.	.	0	0	0	0	0	0	0	0	0	0	0	0	0	0	0	0
Am_Tr_190750	366	.	.	.	0	0	0	0	0	0	0	0	0	0	0	0	0	0	0	0
Am_Tr_190751	389	QCE08782.1_hexosaminidase [Vigna unguiculata]	AT1G65590.1_beta-hexosaminidase 3, GeneName=HEXO3	.	0.376667	0.16	0	0	1.13	0	0	0	0	0.48	0	0	0	0	0	0
Am_Tr_190752	1389	XP_046129285.1_uncharacterized protein B0J15DRAFT_497878 [Fusarium solani] KAH7249524.1 hypothetical protein B0J15DRAFT_497878 [Fusarium solani]	AT2G04350.1_AMP-dependent synthetase and ligase family protein, GeneName=LACS8	IPR000873_AMP-dependent synthetase/ligase	0.583333	0	0	0	0	0.16	1.59	0	0	0	0	0	0	0	0	0
Am_Tr_190753	359	XP_026285730.1_adenylate cyclase type 8-like [Frankliniella occidentalis]	.	IPR001054_Adenylyl cyclase class-3/4/guanylyl cyclase; IPR029787_Nucleotide cyclase	0	0	0.76	0	0	0	0	0	0	0	1.65	0.63	0	0	0	0
Am_Tr_190754	314	.	.	.	0	0	0	0	0	0	0	0	0	0	0	0	0	0	0	0
Am_Tr_190755	441	AMB26867.1_E3 ubiquitin-protein ligase MARCH6, partial [Avicennia officinalis]	AT4G34100.2_RING/U-box superfamily protein, GeneName=CER9	.	0.36	0.696667	0.493333	0.56	0	0	1.08	1.24	0.48	0.37	0	0	1.48	0.84	0	0.84
Am_Tr_190756	1767	XP_046137294.1_inositol-pentakisphosphate 2-kinase-domain-containing protein [Fusarium solani] KAH7272677.1 inositol-pentakisphosphate 2-kinase-domain-containing protein [Fusarium solani]	.	IPR009286_Inositol-pentakisphosphate 2-kinase	0.646667	0	0	0	0	0.25	1.69	0	0	0	0	0	0	0	0	0
Am_Tr_190757	405	XP_046137294.1_inositol-pentakisphosphate 2-kinase-domain-containing protein [Fusarium solani] KAH7272677.1 inositol-pentakisphosphate 2-kinase-domain-containing protein [Fusarium solani]	.	.	0.723333	0	0	0	0	0	2.17	0	0	0	0	0	0	0	0	0
Am_Tr_190758	2108	XP_026289888.1_NFX1-type zinc finger-containing protein 1-like, partial [Frankliniella occidentalis]	AT5G37030.1_P-loop containing nucleoside triphosphate hydrolases superfamily protein	IPR041679_DNA2/NAM7 helicase-like, C-terminal; IPR003593_AAA+ ATPase domain; IPR041677_DNA2/NAM7 helicase, helicase domain; IPR027417_P-loop containing nucleoside triphosphate hydrolase	0	0	0.746667	0	0	0	0	0	0	0	2.24	0	0	0	0	0
Am_Tr_190759	407	.	.	.	0.17	0	0	0	0.51	0	0	0	0	0	0	0	0	0	0	0
Am_Tr_190760	405	.	.	.	0.58	0	0	0	0	0	1.74	0	0	0	0	0	0	0	0	0
Am_Tr_190761	320	.	.	.	0	0	0	0	0	0	0	0	0	0	0	0	0	0	0	0
Am_Tr_190762	266	.	.	.	0	0.536667	0	0.523333	0	0	0	1.61	0	0	0	0	0	0	0	1.57
Am_Tr_190763	446	.	.	.	0.143333	0	0	0	0	0.43	0	0	0	0	0	0	0	0	0	0
Am_Tr_190764	209	XP_004031849.1_ribosomal protein, putative [Ichthyophthirius multifiliis] EGR30253.1 ribosomal protein, putative [Ichthyophthirius multifiliis]	AT3G47370.1_Ribosomal protein S10p/S20e family protein	.	0	0	0	1.65667	0	0	0	0	0	0	0	0	0	0	0	4.97
Am_Tr_190765	427	XP_001030939.2_40S ribosomal protein S20 [Tetrahymena thermophila SB210] EAR83276.2 40S ribosomal protein S20 [Tetrahymena thermophila SB210]	AT3G47370.1_Ribosomal protein S10p/S20e family protein	IPR001848_Ribosomal protein S10; IPR005729_Ribosomal protein S10, eukaryotic/archaeal; IPR027486_Ribosomal protein S10 domain; IPR036838_Ribosomal protein S10 domain superfamily	0	0	0.646667	0.303333	0	0	0	0	0	0	0.75	0	1.19	0.45	0.46	0
Am_Tr_190766	466	XP_001030939.2_40S ribosomal protein S20 [Tetrahymena thermophila SB210] EAR83276.2 40S ribosomal protein S20 [Tetrahymena thermophila SB210]	AT3G45030.1_Ribosomal protein S10p/S20e family protein	IPR001848_Ribosomal protein S10; IPR036838_Ribosomal protein S10 domain superfamily; IPR005729_Ribosomal protein S10, eukaryotic/archaeal; IPR027486_Ribosomal protein S10 domain	0	0	0	0.886667	0	0	0	0	0	0	0	0	0	1.52	0	1.14
Am_Tr_190767	541	XP_001030939.2_40S ribosomal protein S20 [Tetrahymena thermophila SB210] EAR83276.2 40S ribosomal protein S20 [Tetrahymena thermophila SB210]	AT3G47370.1_Ribosomal protein S10p/S20e family protein	.	0	0	0.423333	0	0	0	0	0	0	0	0.25	0	1.02	0	0	0
Am_Tr_190768	430	XP_001030939.2_40S ribosomal protein S20 [Tetrahymena thermophila SB210] EAR83276.2 40S ribosomal protein S20 [Tetrahymena thermophila SB210]	AT3G47370.1_Ribosomal protein S10p/S20e family protein	.	0	0.29	0	0.146667	0	0	0	0.87	0	0	0	0	0	0.44	0	0
Am_Tr_190769	474	PNX98468.1_putative copia-type polyprotein, partial [Trifolium pratense]	.	IPR025724_GAG-pre-integrase domain; IPR012337_Ribonuclease H-like superfamily; IPR001584_Integrase, catalytic core	1.07	0.763333	0.976667	1.11	1.96	0	1.25	0.72	1.25	0.32	0	0.35	2.58	1.84	0.38	1.11
Am_Tr_190770	504	GAU44417.1_hypothetical protein TSUD_100640 [Trifolium subterraneum]	.	IPR025724_GAG-pre-integrase domain; IPR001584_Integrase, catalytic core; IPR012337_Ribonuclease H-like superfamily	0.11	1.37	1.39	0.55	0	0	0.33	0.32	2.34	1.45	0.55	1.89	1.73	0.69	0.34	0.62
Am_Tr_190771	377	GAU44417.1_hypothetical protein TSUD_100640 [Trifolium subterraneum]	.	.	0.683333	0	0	0.0266667	0.61	0	1.44	0	0	0	0	0	0	0	0	0.08
Am_Tr_190772	618	GAU44417.1_hypothetical protein TSUD_100640 [Trifolium subterraneum]	.	IPR025724_GAG-pre-integrase domain; IPR001584_Integrase, catalytic core; IPR012337_Ribonuclease H-like superfamily	0.86	0.763333	0.446667	0.24	1.65	0.73	0.2	0.69	0.98	0.62	0	1.13	0.21	0	0.24	0.48
Am_Tr_190773	202	PNX98468.1_putative copia-type polyprotein, partial [Trifolium pratense]	.	.	0	1.93	2.18667	2.07667	0	0	0	0	0	5.79	0	0	6.56	0	0	6.23
Am_Tr_190774	608	.	.	.	0.166667	0.303333	0.07	0.166667	0	0.5	0	0.48	0	0.43	0	0	0.21	0	0.5	0
Am_Tr_190775	1010	XP_020219833.1_NAC domain-containing protein 100 [Cajanus cajan]	AT5G61430.1_NAC domain containing protein 100, GeneName=NAC100	IPR036093_NAC domain superfamily; IPR003441_NAC domain	0	0	0	0	0	0	0	0	0	0	0	0	0	0	0	0
Am_Tr_190776	1096	RHN44282.1_putative transcription factor NAM family [Medicago truncatula]	AT5G61430.1_NAC domain containing protein 100, GeneName=NAC100	IPR003441_NAC domain; IPR036093_NAC domain superfamily	0	0	0	0	0	0	0	0	0	0	0	0	0	0	0	0
Am_Tr_190777	663	.	.	.	0	0	0.84	0	0	0	0	0	0	0	2.14	0.2	0.18	0	0	0
Am_Tr_190778	800	XP_025623284.1_uncharacterized protein LOC112715699 [Arachis hypogaea]	.	.	3.16333	1.49667	0.686667	0.883333	7.48	1.34	0.67	0.98	2.62	0.89	0.27	1.09	0.7	0.81	1.01	0.83
Am_Tr_190779	395	.	.	.	0.343333	0.666667	0.64	0.523333	0.48	0.55	0	1.54	0	0.46	0.44	1.48	0	0	0.54	1.03
Am_Tr_190780	470	.	.	.	0	0.25	0	0.25	0	0	0	0	0.42	0.33	0	0	0	0.75	0	0
Am_Tr_190781	489	XP_046127522.1_uncharacterized protein B0J15DRAFT_451265 [Fusarium solani] KAH7244838.1 hypothetical protein B0J15DRAFT_451265 [Fusarium solani]	.	IPR027267_AH/BAR domain superfamily	0.886667	0	0	0	0	0	2.66	0	0	0	0	0	0	0	0	0
Am_Tr_190782	1795	XP_003531555.1_aminotransferase ALD1, chloroplastic isoform X1 [Glycine max] XP_028246559.1 aminotransferase ALD1, chloroplastic-like [Glycine soja] KAG5136972.1 hypothetical protein JHK82_021703 [Glycine max] KAH1051811.1 hypothetical protein GYH30_021621 [Glycine max] KRH43921.1 hypothetical protein GLYMA_08G180600v4 [Glycine max] RZB97485.1 Aminotransferase ALD1, chloroplastic isoform A [Glyci…	AT2G13810.1_AGD2-like defense response protein 1, GeneName=ALD1	IPR019942_LL-diaminopimelate aminotransferase/aminotransferase ALD1; IPR004839_Aminotransferase, class I/classII; IPR015424_Pyridoxal phosphate-dependent transferase	0	4.19	1.29	0.06	0	0	0	0	7.47	5.1	2.28	0.97	0.62	0.18	0	0
Am_Tr_190783	751	XP_003593162.1_aminotransferase ALD1, chloroplastic [Medicago truncatula] AES63413.1 LL-diaminopimelate aminotransferase [Medicago truncatula] RHN71628.1 putative LL-diaminopimelate aminotransferase [Medicago truncatula]	AT2G13810.1_AGD2-like defense response protein 1, GeneName=ALD1	IPR004839_Aminotransferase, class I/classII; IPR015424_Pyridoxal phosphate-dependent transferase	0	0.36	0.0466667	0	0	0	0	0	1.08	0	0	0	0.14	0	0	0
Am_Tr_190784	794	.	.	.	0.606667	0	0	0	0	1.01	0.81	0	0	0	0	0	0	0	0	0
Am_Tr_190785	788	.	.	.	0	0	0.0466667	0	0	0	0	0	0	0	0.14	0	0	0	0	0
Am_Tr_190786	490	KAG4391781.1_hypothetical protein GLYMA_05G248850v4 [Glycine max] KAH1079907.1 hypothetical protein GYH30_057033 [Glycine max]	.	.	0	0	0	0.12	0	0	0	0	0	0	0	0	0	0	0.36	0
Am_Tr_190787	499	KAG4391781.1_hypothetical protein GLYMA_05G248850v4 [Glycine max] KAH1079907.1 hypothetical protein GYH30_057033 [Glycine max]	.	.	0	0	0.106667	0	0	0	0	0	0	0	0	0.32	0	0	0	0
Am_Tr_190788	245	.	.	.	8.62	2.23667	0.706667	1.48333	14.39	2.48	8.99	0	2.78	3.93	0	0	2.12	0	2.28	2.17
Am_Tr_190789	603	XP_035330391.1_NADH-ubiquinone oxidoreductase 17.8 kDa subunit [Colletotrichum scovillei] KXH44395.1 NADH-ubiquinone oxidoreductase 17.8 kDa subunit [Colletotrichum simmondsii] KXH54005.1 NADH-ubiquinone oxidoreductase 17.8 kDa subunit [Colletotrichum nymphaeae SA-01] KAF4777388.1 NADH-ubiquinone oxidoreductase 17.8 kDa subunit [Colletotrichum scovillei] KAG7058842.1 NADH-ubiquinone oxidoreductas…	.	.	0	0.143333	2.32	0.0833333	0	0	0	0	0	0.43	4.13	0.7	2.13	0	0	0.25
Am_Tr_190790	587	XP_046138588.1_uncharacterized protein B0J15DRAFT_459043 [Fusarium solani] KAH7273971.1 hypothetical protein B0J15DRAFT_459043 [Fusarium solani]	.	.	2.05	0	0	0	0	0.79	5.36	0	0	0	0	0	0	0	0	0
Am_Tr_190791	363	.	.	.	0.223333	0.186667	0.203333	0	0	0.67	0	0	0	0.56	0	0.61	0	0	0	0
Am_Tr_190792	439	.	.	.	0	0	0.25	0	0	0	0	0	0	0	0	0	0.75	0	0	0
Am_Tr_190793	258	SBS94469.1_hypothetical protein PMALA_043440 [Plasmodium malariae]	.	.	0	0	1.63333	0	0	0	0	0	0	0	1.52	0	3.38	0	0	0
Am_Tr_190794	224	KAF1980992.1_hypothetical protein K402DRAFT_343363, partial [Aulographum hederae CBS 113979]	.	.	2.51333	0	0	0	7.54	0	0	0	0	0	0	0	0	0	0	0
Am_Tr_190795	258	KAF1980992.1_hypothetical protein K402DRAFT_343363, partial [Aulographum hederae CBS 113979]	.	.	0	0	0	0.593333	0	0	0	0	0	0	0	0	0	1.78	0	0
Am_Tr_190796	771	XP_002484510.1_hypothetical protein TSTA_040370 [Talaromyces stipitatus ATCC 10500] EED14557.1 hypothetical protein TSTA_040370 [Talaromyces stipitatus ATCC 10500]	.	.	0.173333	1.27	0.0466667	0.113333	0.35	0.17	0	0	3.81	0	0.14	0	0	0.34	0	0
Am_Tr_190797	973	TVY31859.1_hypothetical protein LOCC1_G008330, partial [Lachnellula occidentalis]	.	.	0.17	0.04	0.0366667	0.166667	0	0.51	0	0.12	0	0	0.11	0	0	0.25	0	0.25
Am_Tr_190798	330	XP_018712500.1_hypothetical protein METBIDRAFT_39660, partial [Metschnikowia bicuspidata var. bicuspidata NRRL YB-4993] OBA22004.1 hypothetical protein METBIDRAFT_39660, partial [Metschnikowia bicuspidata var. bicuspidata NRRL YB-4993]	.	.	0	0	0	0	0	0	0	0	0	0	0	0	0	0	0	0
Am_Tr_190799	469	KAG9300028.1_hypothetical protein G9A89_009756 [Geosiphon pyriformis]	.	.	0	0	0	0	0	0	0	0	0	0	0	0	0	0	0	0
Am_Tr_190800	309	KAF3945953.1_hypothetical protein CMV_027724 [Castanea mollissima]	.	.	0.296667	0	0	0	0	0	0.89	0	0	0	0	0	0	0	0	0
Am_Tr_190801	253	PLB42834.1_hypothetical protein P170DRAFT_371375, partial [Aspergillus steynii IBT 23096]	.	.	0	0	0	0	0	0	0	0	0	0	0	0	0	0	0	0
Am_Tr_190802	2007	XP_045795222.1_MDIS1-interacting receptor like kinase 2-like [Trifolium pratense]	AT4G08850.1_Leucine-rich repeat receptor-like protein kinase family protein	IPR001611_Leucine-rich repeat; IPR011009_Protein kinase-like domain superfamily; IPR000719_Protein kinase domain	0.203333	0	0	0.2	0.22	0.22	0.17	0	0	0	0	0	0	0.16	0.33	0.11
Am_Tr_190803	875	.	.	.	0	0	1.53	0	0	0	0	0	0	0	3.15	0.69	0.75	0	0	0
Am_Tr_190804	299	.	.	.	0	0.356667	0	0.366667	0	0	0	1.07	0	0	0	0	0	0	1.1	0
Am_Tr_190805	678	.	AT1G60780.1_Clathrin adaptor complexes medium subunit family protein, GeneName=HAP13	.	0	0.316667	0	0	0	0	0	0	0.23	0.72	0	0	0	0	0	0
Am_Tr_190806	2137	XP_026282235.1_septin-7 isoform X7 [Frankliniella occidentalis]	.	IPR027417_P-loop containing nucleoside triphosphate hydrolase; IPR030379_Septin-type guanine nucleotide-binding (G) domain	0	0.0166667	0.69	0	0	0	0	0	0	0.05	1.55	0.16	0.36	0	0	0
Am_Tr_190807	2754	XP_026282231.1_septin-7 isoform X3 [Frankliniella occidentalis]	.	IPR016491_Septin; IPR030379_Septin-type guanine nucleotide-binding (G) domain; IPR027417_P-loop containing nucleoside triphosphate hydrolase	0	0.0933333	1.10667	0	0	0	0	0	0.12	0.16	2.7	0.41	0.21	0	0	0
Am_Tr_190808	204	.	.	.	0	0	0	0	0	0	0	0	0	0	0	0	0	0	0	0
Am_Tr_190809	221	.	.	.	2.71667	0	0	0	8.15	0	0	0	0	0	0	0	0	0	0	0
Am_Tr_190810	561	.	.	.	1.39667	0	0.0766667	0.0933333	4.19	0	0	0	0	0	0.23	0	0	0.28	0	0
Am_Tr_190811	438	.	.	.	1.17333	0	0.956667	0.286667	3.52	0	0	0	0	0	2.87	0	0	0.86	0	0
Am_Tr_190812	400	.	.	.	0.86	0	0.306667	0.343333	1.59	0.54	0.45	0	0	0	0.43	0.49	0	1.03	0	0
Am_Tr_190813	1429	KXH45311.1_Sec23/Sec24 trunk domain-containing protein [Colletotrichum nymphaeae SA-01]	AT3G07100.1_Sec23/Sec24 protein transport family protein, GeneName=ERMO2	IPR036180_Gelsolin-like domain superfamily; IPR036175_Sec23/Sec24 helical domain superfamily; IPR007123_Gelsolin-like domain; IPR036465_von Willebrand factor A-like domain superfamily; IPR006900_Sec23/Sec24, helical domain; IPR012990_Sec23/Sec24 beta-sandwich; IPR006896_Sec23/Sec24, trunk domain	0	0.0266667	1.09333	0	0	0	0	0.08	0	0	2.24	0.3	0.74	0	0	0
Am_Tr_190814	531	XP_022471125.1_RNA polymerase Rpb5 domain-containing protein [Colletotrichum orchidophilum] OHE93961.1 RNA polymerase Rpb5 domain-containing protein [Colletotrichum orchidophilum]	.	.	0	0	0.626667	0	0	0	0	0	0	0	0.76	0.86	0.26	0	0	0
Am_Tr_190815	391	.	.	.	0	0.533333	0	0.183333	0	0	0	1.6	0	0	0	0	0	0	0.55	0
Am_Tr_190816	390	.	.	.	0	0	0.32	0	0	0	0	0	0	0	0	0	0.96	0	0	0
Am_Tr_190817	1050	PNX62013.1_F-box/kelch-repeat protein, partial [Trifolium pratense]	.	.	0.923333	0.383333	0.53	0.346667	0.93	0.81	1.03	0.22	0.63	0.3	0.67	0.43	0.49	0	0.35	0.69
Am_Tr_190818	1662	XP_046132743.1_uncharacterized protein B0J15DRAFT_256863 [Fusarium solani] KAH7263876.1 hypothetical protein B0J15DRAFT_256863 [Fusarium solani]	AT1G17745.1_D-3-phosphoglycerate dehydrogenase, GeneName=PGDH	IPR006139_D-isomer specific 2-hydroxyacid dehydrogenase, catalytic domain; IPR006140_D-isomer specific 2-hydroxyacid dehydrogenase, NAD-binding domain; IPR036291_NAD(P)-binding domain superfamily; IPR045865_ACT-like domain	1.27	0	0	0	0.07	0	3.74	0	0	0	0	0	0	0	0	0
Am_Tr_190819	333	.	.	.	0	0	0	0	0	0	0	0	0	0	0	0	0	0	0	0
Am_Tr_190820	261	.	.	.	0	0	0	0	0	0	0	0	0	0	0	0	0	0	0	0
Am_Tr_190821	297	XP_026283068.1_homeobox protein Hmx-like [Frankliniella occidentalis]	.	.	0	0	0.66	0	0	0	0	0	0	0	0.92	1.06	0	0	0	0
Am_Tr_190822	473	KAH7095599.1_aldehyde dehydrogenase domain-containing protein [Paraphoma chrysanthemicola]	AT3G24503.1_aldehyde dehydrogenase 2C4, GeneName=ALDH2C4	IPR015590_Aldehyde dehydrogenase domain; IPR016161_Aldehyde/histidinol dehydrogenase	0	0	0	0.37	0	0	0	0	0	0	0	0	0	0.74	0	0.37
Am_Tr_190823	801	KAH7085960.1_aldehyde dehydrogenase domain-containing protein [Paraphoma chrysanthemicola]	AT3G48000.1_aldehyde dehydrogenase 2B4, GeneName=ALDH2B4	IPR016161_Aldehyde/histidinol dehydrogenase; IPR015590_Aldehyde dehydrogenase domain	0	0.1	0.09	0.326667	0	0	0	0.16	0	0.14	0.27	0	0	0.49	0.33	0.16
Am_Tr_190824	214	KAF2833283.1_aldehyde dehydrogenase [Ophiobolus disseminans]	.	.	0	0	0	1.45	0	0	0	0	0	0	0	0	0	4.35	0	0
Am_Tr_190825	296	.	.	.	0	0.88	0	0	0	0	0	0	2.64	0	0	0	0	0	0	0
Am_Tr_190826	292	PRQ31891.1_putative non-specific serine/threonine protein kinase [Rosa chinensis]	AT3G28450.1_Leucine-rich repeat protein kinase family protein	.	0	0.846667	0	0	0	0	0	1.16	1.38	0	0	0	0	0	0	0
Am_Tr_190827	394	.	.	.	0	0.203333	0	0.176667	0	0	0	0	0.61	0	0	0	0	0	0	0.53
Am_Tr_190828	345	ADV57688.1_beta tubulin chain, partial [Culex pipiens complex sp. YL-2011]	AT4G20890.1_tubulin beta-9 chain, GeneName=TUB9	IPR036525_Tubulin/FtsZ, GTPase domain superfamily; IPR000217_Tubulin; IPR002453_Beta tubulin; IPR003008_Tubulin/FtsZ, GTPase domain	0	0	1.08	0	0	0	0	0	0	0	0	0	3.24	0	0	0
Am_Tr_190829	412	KAG0015651.1_alpha-tubulin, partial [Podila clonocystis] KAG0082593.1 alpha-tubulin, partial [Podila epicladia] KAG0087905.1 alpha-tubulin, partial [Podila epicladia]	AT5G23860.1_tubulin beta 8, GeneName=TUB8	IPR000217_Tubulin; IPR036525_Tubulin/FtsZ, GTPase domain superfamily; IPR003008_Tubulin/FtsZ, GTPase domain; IPR002453_Beta tubulin	0	0	0	0.483333	0	0	0	0	0	0	0	0	0	1.45	0	0
Am_Tr_190830	440	.	.	.	0	0	0	0	0	0	0	0	0	0	0	0	0	0	0	0
Am_Tr_190831	640	.	.	.	0.416667	0	0	0	0.69	0	0.56	0	0	0	0	0	0	0	0	0
Am_Tr_190832	255	.	.	.	0.693333	0	0	0	0	2.08	0	0	0	0	0	0	0	0	0	0
Am_Tr_190833	592	XP_046132100.1_heme peroxidase [Fusarium solani] KAH7260004.1 heme peroxidase [Fusarium solani]	.	.	0.66	0	0	0	0	1.56	0.42	0	0	0	0	0	0	0	0	0
Am_Tr_190834	230	XP_009523807.1_hypothetical protein PHYSODRAFT_285558, partial [Phytophthora sojae] EGZ21090.1 hypothetical protein PHYSODRAFT_285558, partial [Phytophthora sojae]	AT3G07110.1_Ribosomal protein L13 family protein	.	3.38667	0	0	0	0	10.16	0	0	0	0	0	0	0	0	0	0
Am_Tr_190835	361	TYZ58265.1_hypothetical protein PybrP1_007942 [Pythium brassicum]	AT3G24830.1_Ribosomal protein L13 family protein	IPR005755_Ribosomal protein L13, eukaryotic/archaeal; IPR036899_Ribosomal protein L13 superfamily; IPR005822_Ribosomal protein L13	2.39	0	0	0	1.34	0.68	5.15	0	0	0	0	0	0	0	0	0
Am_Tr_190836	577	KXX79413.1_hypothetical protein MMYC01_204068 [Madurella mycetomatis] KXX82208.1 hypothetical protein MMYC01_201676 [Madurella mycetomatis]	.	IPR025649_Protein of unknown function DUF4360	0.873333	0	0	0	0	1.08	1.54	0	0	0	0	0	0	0	0	0
Am_Tr_190837	1157	XP_035331690.1_3-isopropylmalate dehydratase [Colletotrichum scovillei] KAF4778687.1 3-isopropylmalate dehydratase [Colletotrichum scovillei] KAG7043976.1 3-isopropylmalate dehydratase [Colletotrichum scovillei] KAG7046077.1 3-isopropylmalate dehydratase [Colletotrichum scovillei] KAG7063425.1 3-isopropylmalate dehydratase [Colletotrichum scovillei]	AT2G43090.1_Aconitase/3-isopropylmalate dehydratase protein	IPR004431_3-isopropylmalate dehydratase, small subunit; IPR000573_Aconitase A/isopropylmalate dehydratase small subunit, swivel domain	0	0	0.133333	0.0333333	0	0	0	0	0	0	0	0.1	0.3	0	0	0.1
Am_Tr_190838	1119	XP_003046097.1_uncharacterized protein NECHADRAFT_32154 [Fusarium vanettenii 77-13-4] EEU40384.1 predicted protein [Fusarium vanettenii 77-13-4]	AT2G43090.1_Aconitase/3-isopropylmalate dehydratase protein	IPR004431_3-isopropylmalate dehydratase, small subunit; IPR000573_Aconitase A/isopropylmalate dehydratase small subunit, swivel domain	0	0	0	0.0366667	0	0	0	0	0	0	0	0	0	0.11	0	0
Am_Tr_190839	1696	KXH48581.1_3-isopropylmalate dehydratase [Colletotrichum nymphaeae SA-01]	AT2G43090.1_Aconitase/3-isopropylmalate dehydratase protein	IPR004431_3-isopropylmalate dehydratase, small subunit; IPR036008_Aconitase, iron-sulfur domain; IPR001030_Aconitase/3-isopropylmalate dehydratase large subunit, alpha/beta/alpha domain; IPR000573_Aconitase A/isopropylmalate dehydratase small subunit, swivel domain	0	0	0.37	0	0	0	0	0	0	0	0.81	0	0.3	0	0	0
Am_Tr_190840	1658	KXH48581.1_3-isopropylmalate dehydratase [Colletotrichum nymphaeae SA-01]	AT2G43090.1_Aconitase/3-isopropylmalate dehydratase protein	IPR004431_3-isopropylmalate dehydratase, small subunit; IPR000573_Aconitase A/isopropylmalate dehydratase small subunit, swivel domain; IPR036008_Aconitase, iron-sulfur domain; IPR001030_Aconitase/3-isopropylmalate dehydratase large subunit, alpha/be	0.41	0.02	0	0	0	0	1.23	0	0	0.06	0	0	0	0	0	0
Am_Tr_190841	655	EKG17139.1_Aconitase A/isopropylmalate dehydratase small subunit swivel [Macrophomina phaseolina MS6]	AT2G43090.1_Aconitase/3-isopropylmalate dehydratase protein	IPR000573_Aconitase A/isopropylmalate dehydratase small subunit, swivel domain; IPR004431_3-isopropylmalate dehydratase, small subunit	0	0	0.303333	0	0	0	0	0	0	0	0.91	0	0	0	0	0
Am_Tr_190842	568	XP_026282068.1_protein FAM151B [Frankliniella occidentalis]	.	IPR019356_Protein of unknown function DUF2181	0	0	0.38	0	0	0	0	0	0	0	0.91	0	0.23	0	0	0
Am_Tr_190843	1059	.	.	.	0	0	0.17	0	0	0	0	0	0	0	0.51	0	0	0	0	0
Am_Tr_190844	1273	.	.	.	0	0.0533333	0.33	0	0	0	0	0	0	0.16	0.65	0.34	0	0	0	0
Am_Tr_190845	1720	GAU51752.1_hypothetical protein TSUD_415440 [Trifolium subterraneum]	.	.	0.366667	0	0.0166667	0.02	0.51	0.13	0.46	0	0	0	0	0	0.05	0	0	0.06
Am_Tr_190846	1854	GAU51752.1_hypothetical protein TSUD_415440 [Trifolium subterraneum]	.	.	0.503333	0	0	0	0	0	1.51	0	0	0	0	0	0	0	0	0
Am_Tr_190847	446	GAU51752.1_hypothetical protein TSUD_415440 [Trifolium subterraneum]	.	.	0.143333	0	0	0	0	0.43	0	0	0	0	0	0	0	0	0	0
Am_Tr_190848	451	GAU10453.1_hypothetical protein TSUD_419230, partial [Trifolium subterraneum]	.	.	0.116667	0.116667	0	0	0	0	0.35	0	0	0.35	0	0	0	0	0	0
Am_Tr_190849	843	GAU10453.1_hypothetical protein TSUD_419230, partial [Trifolium subterraneum]	.	.	0.173333	0.0433333	0.186667	0.103333	0	0.15	0.37	0	0	0.13	0.13	0.43	0	0	0.16	0.15
Am_Tr_190850	898	GAU10453.1_hypothetical protein TSUD_419230, partial [Trifolium subterraneum]	.	.	0.0466667	0	0	0	0.14	0	0	0	0	0	0	0	0	0	0	0
Am_Tr_190851	2462	MCH84713.1_helicase-like protein [Trifolium medium]	AT3G51700.1_PIF1 helicase	IPR027417_P-loop containing nucleoside triphosphate hydrolase; IPR010285_DNA helicase Pif1-like	0.01	0.0133333	1.40333	0	0	0	0.03	0	0	0.04	3.67	0.3	0.24	0	0	0
Am_Tr_190852	2572	XP_024642375.1_uncharacterized protein LOC112422873 [Medicago truncatula]	AT3G51700.1_PIF1 helicase	IPR010285_DNA helicase Pif1-like; IPR027417_P-loop containing nucleoside triphosphate hydrolase	0	0	0.563333	0	0	0	0	0	0	0	1.11	0.22	0.36	0	0	0
Am_Tr_190853	688	MCH87034.1_ATP-dependent DNA helicase PIF1 [Trifolium medium]	.	IPR010285_DNA helicase Pif1-like; IPR027417_P-loop containing nucleoside triphosphate hydrolase	0	0	0.733333	0	0	0	0	0	0	0	2.2	0	0	0	0	0
Am_Tr_190854	1280	MCH91235.1_fanconi anemia group J protein [Trifolium medium]	AT1G20720.1_RAD3-like DNA-binding helicase protein	.	0.0233333	0.1	0.0766667	0.363333	0	0	0.07	0	0.3	0	0.15	0	0.08	0	0.28	0.81
Am_Tr_190855	548	CAD1822084.1_unnamed protein product [Ananas comosus var. bracteatus]	AT3G12580.1_heat shock protein 70, GeneName=HSP70	IPR013126_Heat shock protein 70 family; IPR029047_Heat shock protein 70kD, peptide-binding domain superfamily	0	0	0	0	0	0	0	0	0	0	0	0	0	0	0	0
Am_Tr_190856	423	MCI13088.1_heat-shock protein [Trifolium medium]	AT5G02500.1_heat shock cognate protein 70-1, GeneName=HSC70-1	IPR013126_Heat shock protein 70 family; IPR043129_ATPase, nucleotide binding domain; IPR029047_Heat shock protein 70kD, peptide-binding domain superfamily	0	0.45	0	0	0	0	0	1.35	0	0	0	0	0	0	0	0
Am_Tr_190857	1234	.	.	.	0.126667	0.286667	0.08	0.123333	0.19	0.19	0	0.37	0	0.49	0	0	0.24	0.28	0	0.09
Am_Tr_190858	365	RDX65097.1_Mitochondrial carrier protein MTM1 [Mucuna pruriens]	AT4G27940.1_manganese tracking factor for mitochondrial SOD2, GeneName=MTM1	.	1.09	0	0	0	3.27	0	0	0	0	0	0	0	0	0	0	0
Am_Tr_190859	358	KAG6613118.1_BAG domain [Phytophthora cinnamomi]	.	.	0.39	0	0	0	0	0	1.17	0	0	0	0	0	0	0	0	0
Am_Tr_190860	1118	GAX98396.1_Hypothetical protein PINS_006265 [Pythium insidiosum]	.	IPR036533_BAG domain superfamily; IPR003103_BAG domain	0.56	0	0	0	0	0	1.68	0	0	0	0	0	0	0	0	0
Am_Tr_190861	866	GAX98396.1_Hypothetical protein PINS_006265 [Pythium insidiosum]	.	IPR003103_BAG domain; IPR036533_BAG domain superfamily	0.263333	0	0	0	0	0	0.79	0	0	0	0	0	0	0	0	0
Am_Tr_190862	720	.	.	.	0	0.166667	0.306667	0.32	0	0	0	0	0	0.5	0.16	0.18	0.58	0.57	0.39	0
Am_Tr_190863	481	.	.	.	0	0	0.15	0.123333	0	0	0	0	0	0	0	0	0.45	0	0.37	0
Am_Tr_190864	868	MCH96155.1_hypothetical protein [Trifolium medium]	ATMG00860.1_DNA/RNA polymerases superfamily protein, GeneName=ORF158	.	0	0	0	0	0	0	0	0	0	0	0	0	0	0	0	0
Am_Tr_190865	487	PNX86717.1_retrotransposon-related protein, partial [Trifolium pratense]	ATMG00860.1_DNA/RNA polymerases superfamily protein, GeneName=ORF158	IPR043502_DNA/RNA polymerase superfamily; IPR000477_Reverse transcriptase domain	0	0	0	0	0	0	0	0	0	0	0	0	0	0	0	0
Am_Tr_190866	253	MCI21157.1_hypothetical protein [Trifolium medium]	.	.	0.716667	0.656667	1.16	1.26667	0	2.15	0	1.97	0	0	1.64	0	1.84	0	0	3.8
Am_Tr_190867	322	MCI08332.1_enzymatic polyprotein [Trifolium medium]	ATMG00860.1_DNA/RNA polymerases superfamily protein, GeneName=ORF158	IPR043502_DNA/RNA polymerase superfamily	0	0.253333	0.523333	1.14667	0	0	0	0	0	0.76	0	0	1.57	0.86	0	2.58
Am_Tr_190868	275	MCH81990.1_enzymatic polyprotein [Trifolium medium]	ATMG00860.1_DNA/RNA polymerases superfamily protein, GeneName=ORF158	.	0	1.14	0.876667	0.93	0	0	0	0	3.42	0	0	0	2.63	1.4	0	1.39
Am_Tr_190869	609	.	.	.	0.166667	0.09	0.423333	0.08	0.25	0.25	0	0	0.27	0	0.41	0.23	0.63	0	0	0.24
Am_Tr_190870	701	.	.	.	0	0.2	0.0633333	0	0	0	0	0.38	0.22	0	0	0.19	0	0	0	0
Am_Tr_190871	285	ACO83024.1_chalcone synthase, partial [Trifolium subterraneum]	AT5G13930.1_Chalcone and stilbene synthase family protein, GeneName=TT4	.	10.03	2.44	1.58	2.09667	7.82	10.51	11.76	2.51	1.5	3.31	0	2.42	2.32	2.49	2.56	1.24
Am_Tr_190872	1005	ACO83024.1_chalcone synthase, partial [Trifolium subterraneum]	AT5G13930.1_Chalcone and stilbene synthase family protein, GeneName=TT4	.	0.816667	0	0	0.04	0.5	1.75	0.2	0	0	0	0	0	0	0.12	0	0
Am_Tr_190873	256	KAF4308735.1_Tetratricopeptide TPR-1 [Botryosphaeria dothidea]	AT4G39150.1_DNAJ heat shock N-terminal domain-containing protein	.	0	0	0.52	0	0	0	0	0	0	0	1.56	0	0	0	0	0
Am_Tr_190874	617	KAF2855398.1_RNA-binding domain-containing protein [Plenodomus tracheiphilus IPT5]	AT4G13850.4_glycine-rich RNA-binding protein 2, GeneName=GR-RBP2	IPR000504_RNA recognition motif domain; IPR035979_RNA-binding domain superfamily	0	0.07	0	0.316667	0	0	0	0	0	0.21	0	0	0	0.95	0	0
Am_Tr_190875	797	.	.	.	0.166667	0.113333	0.25	0.17	0.17	0.33	0	0.16	0.18	0	0	0.47	0.28	0	0.34	0.17
Am_Tr_190876	770	.	.	.	0	0.05	0.1	0	0	0	0	0	0	0.15	0	0	0.3	0	0	0
Am_Tr_190877	379	XP_046140009.1_uncharacterized protein B0J15DRAFT_14629 [Fusarium solani] KAH7275392.1 hypothetical protein B0J15DRAFT_14629 [Fusarium solani]	.	.	1.01333	0	0	0	0	0	3.04	0	0	0	0	0	0	0	0	0
Am_Tr_190878	575	XP_046140009.1_uncharacterized protein B0J15DRAFT_14629 [Fusarium solani] KAH7275392.1 hypothetical protein B0J15DRAFT_14629 [Fusarium solani]	.	.	0.386667	0	0	0	0	0.27	0.89	0	0	0	0	0	0	0	0	0
Am_Tr_190879	432	RZB52867.1_putative ribonuclease H protein, partial [Glycine soja]	AT4G29090.1_Ribonuclease H-like superfamily protein	.	0	0.81	0	0	0	0	0	0.43	2	0	0	0	0	0	0	0
Am_Tr_190880	965	XP_027345754.1_uncharacterized protein LOC113857764 [Abrus precatorius]	.	.	0.0333333	0	0.0766667	0	0	0	0.1	0	0	0	0	0.12	0.11	0	0	0
Am_Tr_190881	335	.	.	.	0	0	0	0	0	0	0	0	0	0	0	0	0	0	0	0
Am_Tr_190882	910	XP_046140207.1_argininosuccinate synthase [Fusarium solani] KAH7275590.1 argininosuccinate synthase [Fusarium solani]	AT4G24830.2_arginosuccinate synthase family	IPR024074_Argininosuccinate synthetase, catalytic/multimerisation domain body; IPR001518_Argininosuccinate synthase	1.08667	0	0	0	0	0.56	2.7	0	0	0	0	0	0	0	0	0
Am_Tr_190883	569	XP_018253141.1_argininosuccinate synthase [Fusarium oxysporum f. sp. lycopersici 4287] EXK34848.1 argininosuccinate synthase [Fusarium oxysporum f. sp. melonis 26406] EXL54723.1 argininosuccinate synthase [Fusarium oxysporum f. sp. radicis-lycopersici 26381] KNB15096.1 argininosuccinate synthase [Fusarium oxysporum f. sp. lycopersici 4287]	.	IPR024074_Argininosuccinate synthetase, catalytic/multimerisation domain body; IPR001518_Argininosuccinate synthase	0.996667	0	0	0	0	0.28	2.71	0	0	0	0	0	0	0	0	0
Am_Tr_190884	885	XP_035331109.1_von Willebrand factor type A domain-containing protein [Colletotrichum scovillei] KAF4778106.1 von Willebrand factor type A domain-containing protein [Colletotrichum scovillei] KAG7058672.1 von Willebrand factor type A domain-containing protein [Colletotrichum scovillei] KAG7077189.1 von Willebrand factor type A domain-containing protein [Colletotrichum scovillei] KAG7084385.1 von …	AT4G38630.1_regulatory particle non-ATPase 10, GeneName=RPN10	IPR036465_von Willebrand factor A-like domain superfamily; IPR002035_von Willebrand factor, type A	0	0	1.13667	0	0	0	0	0	0	0	1.55	0.27	1.59	0	0	0
Am_Tr_190885	870	XP_046137139.1_uncharacterized protein B0J15DRAFT_180232 [Fusarium solani] KAH7272522.1 hypothetical protein B0J15DRAFT_180232 [Fusarium solani]	.	.	0.426667	0	0	0	0	0.44	0.84	0	0	0	0	0	0	0	0	0
Am_Tr_190886	586	XP_046137139.1_uncharacterized protein B0J15DRAFT_180232 [Fusarium solani] KAH7272522.1 hypothetical protein B0J15DRAFT_180232 [Fusarium solani]	.	.	0.286667	0	0	0	0	0	0.86	0	0	0	0	0	0	0	0	0
Am_Tr_190887	204	.	.	.	0	0	0	0	0	0	0	0	0	0	0	0	0	0	0	0
Am_Tr_190888	415	.	.	.	0	0	0	0	0	0	0	0	0	0	0	0	0	0	0	0
Am_Tr_190889	210	.	.	.	0	0	0	0	0	0	0	0	0	0	0	0	0	0	0	0
Am_Tr_190890	616	.	.	.	0.936667	0	0	0.08	1.22	0	1.59	0	0	0	0	0	0	0	0.24	0
Am_Tr_190891	420	.	.	.	0	0	0	0	0	0	0	0	0	0	0	0	0	0	0	0
Am_Tr_190892	1034	XP_045818473.1_zinc finger MYM-type protein 1-like [Trifolium pratense]	AT3G29765.1_General transcription factor 2-related zinc finger protein	.	0.27	0.216667	0	0.0766667	0.24	0	0.57	0	0.65	0	0	0	0	0.23	0	0
Am_Tr_190893	901	XP_045791578.1_zinc finger MYM-type protein 1-like [Trifolium pratense]	AT1G41920.1_General transcription factor 2-related zinc finger protein	.	0	0.613333	0.0833333	0	0	0	0	0.81	0.3	0.73	0.12	0.13	0	0	0	0
Am_Tr_190894	234	XP_045791578.1_zinc finger MYM-type protein 1-like [Trifolium pratense]	AT1G19260.1_TTF-type zinc finger protein with HAT dimerization domain-containing protein	.	1.9	0	0	0	0	0	5.7	0	0	0	0	0	0	0	0	0
Am_Tr_190895	369	.	.	.	0	0.36	0	0.406667	0	0	0	0	0	1.08	0	0	0	0	0	1.22
Am_Tr_190896	627	.	.	.	0	0.0866667	0.27	0	0	0	0	0	0.26	0	0.19	0.22	0.4	0	0	0
Am_Tr_190897	269	.	.	.	0	0	0	0	0	0	0	0	0	0	0	0	0	0	0	0
Am_Tr_190898	344	XP_028215124.1_uncharacterized protein LOC114397228 [Glycine soja]	.	.	0.303333	1.12667	0	0.103333	0.54	0.37	0	1.05	0	2.33	0	0	0	0	0.31	0
Am_Tr_190899	3029	GAU27776.1_hypothetical protein TSUD_215870 [Trifolium subterraneum]	AT1G43760.1_DNAse I-like superfamily protein	IPR000477_Reverse transcriptase domain	0.18	2.18	0.236667	0.36	0.18	0.33	0.03	3.05	1.78	1.71	0.26	0.19	0.26	0.37	0.4	0.31
Am_Tr_190900	2009	XP_045810906.1_uncharacterized protein LOC123905342 [Trifolium pratense]	AT2G46950.1_cytochrome P450, family 709, subfamily B, polypeptide 2, GeneName=CYP709B2	.	0	0.993333	0.0933333	0	0	0	0	1.19	0.53	1.26	0.04	0.1	0.14	0	0	0
Am_Tr_190901	589	PNX80550.1_cysteine-rich receptor-like protein kinase, partial [Trifolium pratense]	ATMG01250.1_RNA-directed DNA polymerase (reverse transcriptase), GeneName=ORF102	IPR000477_Reverse transcriptase domain; IPR043502_DNA/RNA polymerase superfamily	0	0	0	0	0	0	0	0	0	0	0	0	0	0	0	0
Am_Tr_190902	209	.	.	.	0	0	0	0	0	0	0	0	0	0	0	0	0	0	0	0
Am_Tr_190903	381	.	.	.	0.73	0.79	1.5	0.19	0.59	0.6	1	0.56	1.31	0.5	1.92	0.55	2.03	0	0	0.57
Am_Tr_190904	1572	XP_020237796.1_homeobox-leucine zipper protein HAT7 isoform X1 [Cajanus cajan] KYP44343.1 Homeobox-leucine zipper protein HAT7 [Cajanus cajan]	AT5G15150.1_homeobox 3, GeneName=HB-3	IPR003106_Leucine zipper, homeobox-associated; IPR001356_Homeobox domain; IPR000047_Helix-turn-helix motif; IPR009057_Homeobox-like domain superfamily	0.603333	1.83667	31	3.17	0.21	0.92	0.68	0.41	4.11	0.99	9.92	43.78	39.3	1.84	4.32	3.35
Am_Tr_190905	757	.	.	.	0	0.176667	0.996667	0	0	0	0	0	0.53	0	0	1.09	1.9	0	0	0
Am_Tr_190906	2116	XP_020237798.1_homeobox-leucine zipper protein HAT7 isoform X2 [Cajanus cajan]	.	.	0	0.0233333	0.953333	0.0833333	0	0	0	0	0.07	0	0	1.27	1.59	0	0.06	0.19
Am_Tr_190907	1524	XP_020237798.1_homeobox-leucine zipper protein HAT7 isoform X2 [Cajanus cajan]	AT1G69780.1_Homeobox-leucine zipper protein family, GeneName=ATHB13	IPR001356_Homeobox domain; IPR000047_Helix-turn-helix motif; IPR009057_Homeobox-like domain superfamily; IPR003106_Leucine zipper, homeobox-associated	0	0.103333	1.02333	0	0	0	0	0	0.31	0	0.29	0.72	2.06	0	0	0
Am_Tr_190908	481	.	.	.	0.123333	0.103333	0.113333	0.363333	0.37	0	0	0	0	0.31	0	0.34	0	0.72	0.37	0
Am_Tr_190909	453	.	.	.	0.846667	0	0.116667	0	0.41	0.42	1.71	0	0	0	0	0	0.35	0	0	0
Am_Tr_190910	323	.	.	.	0	0	0	0	0	0	0	0	0	0	0	0	0	0	0	0
Am_Tr_190911	289	.	.	.	0.793333	0	0	0	1.26	0	1.12	0	0	0	0	0	0	0	0	0
Am_Tr_190912	596	.	.	.	0	0	0.21	0.0833333	0	0	0	0	0	0	0.63	0	0	0	0	0.25
Am_Tr_190913	235	.	.	.	0	0.796667	0	0	0	0	0	0	0	2.39	0	0	0	0	0	0
Am_Tr_190914	419	KAE9086390.1_hypothetical protein PF007_g20790 [Phytophthora fragariae]	.	.	0.293333	0	0	0	0.48	0	0.4	0	0	0	0	0	0	0	0	0
Am_Tr_190915	343	OLN81091.1_60S acidic ribosomal protein P2 [Colletotrichum chlorophyti]	AT2G27710.4_60S acidic ribosomal protein family	IPR027534_Ribosomal protein L12/P1/P2 family	0	0	0	0	0	0	0	0	0	0	0	0	0	0	0	0
Am_Tr_190916	335	KAG8068485.1_hypothetical protein GUJ93_ZPchr0005g15149 [Zizania palustris]	AT2G27710.4_60S acidic ribosomal protein family	IPR027534_Ribosomal protein L12/P1/P2 family	0	0	0	0	0	0	0	0	0	0	0	0	0	0	0	0
Am_Tr_190917	1068	OAV87110.1_UTP-glucose-1-phosphate uridylyltransferase [Puccinia triticina 1-1 BBBD Race 1]	AT5G17310.6_UDP-glucose pyrophosphorylase 2, GeneName=UGP2	IPR002618_UDPGP family; IPR029044_Nucleotide-diphospho-sugar transferases	0	0.106667	0	0.523333	0	0	0	0.22	0	0.1	0	0	0	1.12	0.11	0.34
Am_Tr_190918	217	.	.	.	0	3.64667	0	0	0	0	0	0	0	10.94	0	0	0	0	0	0
Am_Tr_190919	620	.	.	.	0.323333	0.156667	0	0.156667	0	0.97	0	0	0.26	0.21	0	0	0	0.47	0	0
Am_Tr_190920	571	.	.	.	0	0.08	0.466667	0.18	0	0	0	0	0	0.24	0.45	0.25	0.7	0.27	0	0.27
Am_Tr_190921	265	.	.	.	1.57333	1.42667	0	1.08333	0	0	4.72	0	0	4.28	0	0	0	0	1.66	1.59
Am_Tr_190922	381	MCI96569.1_hypothetical protein [Trifolium medium]	.	.	0.2	0	0.16	0.19	0	0.6	0	0	0	0	0.48	0	0	0.57	0	0
Am_Tr_190923	522	KAF4362858.1_hypothetical protein G4B88_014195 [Cannabis sativa]	AT2G40760.1_Rhodanese/Cell cycle control phosphatase superfamily protein	.	0.32	1.09333	0.566667	1.15333	0.32	0.64	0	0.91	2.1	0.27	0	0.89	0.81	0.93	1.59	0.94
Am_Tr_190924	466	.	.	.	0.106667	0.123333	0.216667	0.126667	0	0	0.32	0.37	0	0	0.32	0	0.33	0	0	0.38
Am_Tr_190925	686	.	.	.	0.07	0	0	0.133333	0.21	0	0	0	0	0	0	0	0	0.2	0	0.2
Am_Tr_190926	601	XP_020233869.1_uncharacterized protein LOC109813973 [Cajanus cajan]	.	.	0.07	0.08	0.07	0.0833333	0	0	0.21	0.24	0	0	0	0	0.21	0	0	0.25
Am_Tr_190927	440	.	.	.	0	0.14	0	0	0	0	0	0.42	0	0	0	0	0	0	0	0
Am_Tr_190928	1326	XP_034232390.1_paramyosin, short form-like isoform X1 [Thrips palmi]	.	.	0	0	0.483333	0	0	0	0	0	0	0	1.37	0.08	0	0	0	0
Am_Tr_190929	380	XP_034232391.1_paramyosin, short form-like isoform X2 [Thrips palmi]	.	.	0	0	0.51	0	0	0	0	0	0	0	0	0	1.53	0	0	0
Am_Tr_190930	432	.	.	.	0	0.166667	0.13	0.293333	0	0	0	0	0.5	0	0	0	0.39	0	0	0.88
Am_Tr_190931	372	.	.	.	0	0	0	0	0	0	0	0	0	0	0	0	0	0	0	0
Am_Tr_190932	985	XP_026274769.1_uncharacterized protein LOC113203992 isoform X1 [Frankliniella occidentalis]	.	IPR008253_Marvel domain	0	0	0.403333	0	0	0	0	0	0	0	0.98	0.12	0.11	0	0	0
Am_Tr_190933	728	XP_026274769.1_uncharacterized protein LOC113203992 isoform X1 [Frankliniella occidentalis]	.	.	0	0	0.206667	0	0	0	0	0	0	0	0.62	0	0	0	0	0
Am_Tr_190934	1777	XP_034240755.1_CKLF-like MARVEL transmembrane domain-containing protein 4 [Thrips palmi]	.	IPR008253_Marvel domain	0	0	1.06	0	0	0	0	0	0	0	2.85	0.17	0.16	0	0	0
Am_Tr_190935	942	GEQ66358.1_hypothetical protein JCM33374_g21 [Metschnikowia sp. JCM 33374]	AT1G24360.1_NAD(P)-binding Rossmann-fold superfamily protein	IPR002347_Short-chain dehydrogenase/reductase SDR; IPR036291_NAD(P)-binding domain superfamily	0	0	0.626667	0	0	0	0	0	0	0	0	0.87	1.01	0	0	0
Am_Tr_190936	918	XP_026287873.1_uncharacterized protein LOC113213122 isoform X6 [Frankliniella occidentalis]	.	.	0	0	0.576667	0	0	0	0	0	0	0	1.48	0.13	0.12	0	0	0
Am_Tr_190937	771	.	.	.	0.0966667	0	0.0866667	0	0	0	0.29	0	0	0	0	0.26	0	0	0	0
Am_Tr_190938	691	.	.	.	0.546667	0.203333	0.113333	0	0	0.82	0.82	0.39	0.22	0	0.17	0	0.17	0	0	0
Am_Tr_190939	682	.	.	.	0.07	0.0766667	0.236667	0	0	0.21	0	0	0.23	0	0	0	0.71	0	0	0
Am_Tr_190940	716	XP_020230539.1_uncharacterized protein LOC109811261 [Cajanus cajan]	.	.	0.13	0	0.12	0.0666667	0.39	0	0	0	0	0	0	0.36	0	0	0.2	0
Am_Tr_190941	277	MCH89622.1_ribonuclease H protein [Trifolium medium]	.	.	0.44	0	0	0	0	0	1.32	0	0	0	0	0	0	0	0	0
Am_Tr_190942	771	.	.	.	0.0566667	0.176667	0.21	0.173333	0	0.17	0	0.34	0.19	0	0.14	0.49	0	0.17	0	0.35
Am_Tr_190943	434	MBA0856255.1_hypothetical protein [Gossypium schwendimanii]	.	.	0.15	0.126667	0	0.15	0	0.45	0	0	0	0.38	0	0	0	0	0.45	0
Am_Tr_190944	428	CAN77253.1_hypothetical protein VITISV_020397 [Vitis vinifera]	.	.	0.28	0	0	0	0.46	0	0.38	0	0	0	0	0	0	0	0	0
Am_Tr_190945	368	KYP34868.1_hypothetical protein KK1_044118, partial [Cajanus cajan]	.	.	0.973333	0	0	0	1.28	0	1.64	0	0	0	0	0	0	0	0	0
Am_Tr_190946	779	MCI07485.1_LINE-1 reverse transcriptase like [Trifolium medium]	AT4G29090.1_Ribonuclease H-like superfamily protein	.	0	0.0566667	0	0.0566667	0	0	0	0.17	0	0	0	0	0	0	0	0.17
Am_Tr_190947	435	.	.	.	0.45	0.94	1.29	0.146667	0.45	0.9	0	0.85	1.97	0	1.09	2.31	0.47	0	0.44	0
Am_Tr_190948	208	.	.	.	0	1.58	0	1.71	0	0	0	0	0	4.74	0	0	0	0	0	5.13
Am_Tr_190949	701	.	.	.	0.0666667	0.126667	0	0.0666667	0	0.2	0	0.38	0	0	0	0	0	0.2	0	0
Am_Tr_190950	746	GAU37771.1_hypothetical protein TSUD_102880 [Trifolium subterraneum]	.	.	0	0.0466667	0.233333	0	0	0	0	0	0.14	0	0.35	0.09	0.26	0	0	0
Am_Tr_190951	1130	PNX97001.1_hypothetical protein L195_g020219 [Trifolium pratense]	.	.	0	0.193333	0.343333	0	0	0	0	0.31	0.27	0	0.67	0.24	0.12	0	0	0
Am_Tr_190952	302	XP_045809737.1_uncharacterized protein LOC123904092 [Trifolium pratense]	ATMG00850.1_DNA/RNA polymerases superfamily protein, GeneName=ORF107E	IPR043502_DNA/RNA polymerase superfamily	0	0.823333	1.30333	0.69	0	0	0	0	2.47	0	0	2.01	1.9	1.04	0	1.03
Am_Tr_190953	1039	PNX84169.1_retrotransposon-related protein, partial [Trifolium pratense]	ATMG00850.1_DNA/RNA polymerases superfamily protein, GeneName=ORF107E	IPR000477_Reverse transcriptase domain; IPR043502_DNA/RNA polymerase superfamily	0	0.216667	0.49	0.196667	0	0	0	0.34	0	0.31	0.1	0.77	0.6	0	0.12	0.47
Am_Tr_190954	461	MCI08332.1_enzymatic polyprotein [Trifolium medium]	ATMG00860.1_DNA/RNA polymerases superfamily protein, GeneName=ORF158	IPR043502_DNA/RNA polymerase superfamily; IPR000477_Reverse transcriptase domain	0.133333	0.466667	0.123333	0.133333	0.4	0	0	0.38	0	1.02	0	0.37	0	0	0.4	0
Am_Tr_190955	457	MCH98725.1_enzymatic polyprotein [Trifolium medium]	ATMG00860.1_DNA/RNA polymerases superfamily protein, GeneName=ORF158	.	1.13667	2.10333	0.686667	0.66	1.62	1.12	0.67	2.1	1.79	2.42	0.33	0	1.73	0.79	0.4	0.79
Am_Tr_190956	228	MCI21157.1_hypothetical protein [Trifolium medium]	.	.	0	0	1.01333	0	0	0	0	0	0	0	0	0	3.04	0	0	0
Am_Tr_190957	1009	GAU47870.1_hypothetical protein TSUD_404410 [Trifolium subterraneum]	ATMG00860.1_DNA/RNA polymerases superfamily protein, GeneName=ORF158	IPR043502_DNA/RNA polymerase superfamily; IPR041577_Reverse transcriptase/retrotransposon-derived protein, RNase H-like domain	0.19	0.583333	0.153333	0.08	0.24	0.33	0	0.77	0.66	0.32	0	0.46	0	0	0	0.24
Am_Tr_190958	808	MCI07923.1_hypothetical protein [Trifolium medium]	.	IPR023780_Chromo domain; IPR016197_Chromo-like domain superfamily; IPR012337_Ribonuclease H-like superfamily	1.58333	0.316667	0.24	0.323333	0.49	0.82	3.44	0.31	0.36	0.28	0.27	0.31	0.14	0.81	0	0.16
Am_Tr_190959	2819	KYP38429.1_Retrotransposable element Tf2, partial [Cajanus cajan]	ATMG00860.1_DNA/RNA polymerases superfamily protein, GeneName=ORF158	IPR000477_Reverse transcriptase domain; IPR043502_DNA/RNA polymerase superfamily	0.113333	0.303333	0.186667	0.31	0.04	0.3	0	0.29	0.56	0.06	0.12	0.35	0.09	0.41	0.45	0.07
Am_Tr_190960	2746	MCH88701.1_hypothetical protein [Trifolium medium]	ATMG00860.1_DNA/RNA polymerases superfamily protein, GeneName=ORF158	IPR023780_Chromo domain; IPR016197_Chromo-like domain superfamily	0.303333	0	0	0	0.88	0	0.03	0	0	0	0	0	0	0	0	0
Am_Tr_190961	1107	GAU29071.1_hypothetical protein TSUD_278270 [Trifolium subterraneum]	ATMG00860.1_DNA/RNA polymerases superfamily protein, GeneName=ORF158	IPR043502_DNA/RNA polymerase superfamily; IPR041577_Reverse transcriptase/retrotransposon-derived protein, RNase H-like domain; IPR000477_Reverse transcriptase domain	2.32333	2.06667	1.16667	1.84667	2.28	1.63	3.06	2.4	2.48	1.32	0.63	1.22	1.65	1.83	1.98	1.73
Am_Tr_190962	1075	PNX84169.1_retrotransposon-related protein, partial [Trifolium pratense]	AT3G30770.1_Eukaryotic aspartyl protease family protein	IPR021109_Aspartic peptidase domain superfamily	0.306667	1.86	0.456667	0.526667	0.34	0.4	0.18	3.25	1.35	0.98	0	0.42	0.95	0.22	0.91	0.45
Am_Tr_190963	335	.	.	.	0	1.51333	0.466667	0.883333	0	0	0	1.55	1.62	1.37	0	0	1.4	2.65	0	0
Am_Tr_190964	469	.	.	.	0	1.39333	0.226667	0.326667	0	0	0	1.11	3.07	0	0.32	0.36	0	0.6	0	0.38
Am_Tr_190965	284	.	.	.	0	0	0	0	0	0	0	0	0	0	0	0	0	0	0	0
Am_Tr_190966	224	.	.	.	0.966667	0	1.14	0	2.9	0	0	0	0	0	0	3.42	0	0	0	0
Am_Tr_190967	1873	.	.	.	0	1.09667	0.173333	0.33	0	0	0	1.02	1.33	0.94	0.17	0.25	0.1	0.47	0.35	0.17
Am_Tr_190968	414	.	.	.	0	0.206667	0.76	0.163333	0	0	0	0	0	0.62	0.21	0.84	1.23	0	0.49	0
Am_Tr_190969	594	.	.	.	0	0	0.22	0.0833333	0	0	0	0	0	0	0.42	0.24	0	0	0	0.25
Am_Tr_190970	703	.	.	.	0	0.0733333	0.14	0	0	0	0	0	0.22	0	0	0.33	0.09	0	0	0
Am_Tr_190971	1094	.	.	.	0	0	1.26	0	0	0	0	0	0	0	3.35	0.23	0.2	0	0	0
Am_Tr_190972	1462	XP_026277796.1_ras-related protein Rap1 isoform X1 [Frankliniella occidentalis]	AT5G03530.1_RAB GTPase homolog C2A, GeneName=RABC2A	IPR005225_Small GTP-binding protein domain; IPR001806_Small GTPase; IPR027417_P-loop containing nucleoside triphosphate hydrolase	0	0	0.423333	0	0	0	0	0	0	0	1.21	0	0.06	0	0	0
Am_Tr_190973	1987	XP_026277796.1_ras-related protein Rap1 isoform X1 [Frankliniella occidentalis]	AT5G03530.1_RAB GTPase homolog C2A, GeneName=RABC2A	IPR005225_Small GTP-binding protein domain; IPR001806_Small GTPase; IPR027417_P-loop containing nucleoside triphosphate hydrolase	0	0.02	1	0	0	0	0	0	0.06	0	2.14	0.61	0.25	0	0	0
Am_Tr_190974	661	XP_026277796.1_ras-related protein Rap1 isoform X1 [Frankliniella occidentalis]	AT4G17530.1_RAB GTPase homolog 1C, GeneName=RAB1C	IPR001806_Small GTPase; IPR005225_Small GTP-binding protein domain; IPR027417_P-loop containing nucleoside triphosphate hydrolase	0	0.07	0	0	0	0	0	0.21	0	0	0	0	0	0	0	0
Am_Tr_190975	593	RIA81745.1_hypothetical protein C1645_744276 [Glomus cerebriforme]	.	.	0	0	0	0	0	0	0	0	0	0	0	0	0	0	0	0
Am_Tr_190976	445	.	.	.	0	0	0	0.48	0	0	0	0	0	0	0	0	0	0	0	1.44
Am_Tr_190977	343	.	.	.	0	0	0	0.61	0	0	0	0	0	0	0	0	0	0	0	1.83
Am_Tr_190978	244	.	.	.	0	0	0	0	0	0	0	0	0	0	0	0	0	0	0	0
Am_Tr_190979	202	.	.	.	0	0	0	6.23	0	0	0	0	0	0	0	0	0	0	0	18.69
Am_Tr_190980	444	XP_022642947.1_mediator of RNA polymerase II transcription subunit 16 isoform X2 [Vigna radiata var. radiata]	AT4G04920.2_sensitive to freezing 6, GeneName=SFR6	.	0	0	0	0	0	0	0	0	0	0	0	0	0	0	0	0
Am_Tr_190981	549	QCD76737.1_hypothetical protein DEO72_LG1g358 [Vigna unguiculata]	AT4G04920.2_sensitive to freezing 6, GeneName=SFR6	.	2.51667	1.96	1.3	2.67	0	7.55	0	0	5.88	0	0	3.9	0	0	8.01	0
Am_Tr_190982	461	.	.	.	0	0	0	0	0	0	0	0	0	0	0	0	0	0	0	0
Am_Tr_190983	488	.	.	.	0	0	0	0	0	0	0	0	0	0	0	0	0	0	0	0
Am_Tr_190984	201	OWZ15713.1_Rab GDP dissociation inhibitor alpha [Phytophthora megakarya]	.	.	5.13333	0	0	0	0	0	15.4	0	0	0	0	0	0	0	0	0
Am_Tr_190985	1519	XP_009516088.1_hypothetical protein PHYSODRAFT_284351 [Phytophthora sojae] EGZ28813.1 hypothetical protein PHYSODRAFT_284351 [Phytophthora sojae]	AT5G09550.1_GDP dissociation inhibitor family protein / Rab GTPase activator family protein, GeneName=GDI	IPR036188_FAD/NAD(P)-binding domain superfamily; IPR018203_GDP dissociation inhibitor; IPR000806_Rab GDI protein	0.46	0	0	0	0.07	0.3	1.01	0	0	0	0	0	0	0	0	0
Am_Tr_190986	520	.	.	.	0	0.206667	0	0.21	0	0	0	0	0.35	0.27	0	0	0	0	0.32	0.31
Am_Tr_190987	222	.	.	.	0	0	1.02667	0	0	0	0	0	0	0	3.08	0	0	0	0	0
Am_Tr_190988	260	.	.	.	0	0	0	1.78333	0	0	0	0	0	0	0	0	0	0	5.35	0
Am_Tr_190989	470	.	.	.	0.11	0.283333	0	0	0	0	0.33	0	0.85	0	0	0	0	0	0	0
Am_Tr_190990	4100	MCH81586.1_RNA-directed DNA polymerase (Reverse transcriptase) [Trifolium medium]	.	.	4.76333	0	0.00666667	0.0466667	6.37	4.06	3.86	0	0	0	0	0	0.02	0.02	0.1	0.02
Am_Tr_190991	905	.	.	.	1.12667	0.27	0.153333	0.186667	3.38	0	0	0.81	0	0	0.46	0	0	0.56	0	0
Am_Tr_190992	1971	XP_004490107.1_uncharacterized protein LOC101511498 [Cicer arietinum]	.	.	0	0.07	0.06	0.0366667	0	0	0	0.21	0	0	0.18	0	0	0.11	0	0
Am_Tr_190993	208	.	.	.	0	0	0	0	0	0	0	0	0	0	0	0	0	0	0	0
Am_Tr_190994	444	.	.	.	0	0	0	0	0	0	0	0	0	0	0	0	0	0	0	0
Am_Tr_190995	491	.	.	.	0	0.676667	1.25667	0	0	0	0	2.03	0	0	3.77	0	0	0	0	0
Am_Tr_190996	647	TKY50641.1_hypothetical protein E2542_SST22145 [Spatholobus suberectus]	AT3G55240.1_Plant protein 1589 of unknown function	.	0	0	0.126667	0.0733333	0	0	0	0	0	0	0.19	0	0.19	0	0	0.22
Am_Tr_190997	790	XP_026287404.1_uncharacterized protein LOC113212797 [Frankliniella occidentalis]	.	.	0	0	1.04	0	0	0	0	0	0	0	2.65	0.47	0	0	0	0
Am_Tr_190998	1988	XP_026287404.1_uncharacterized protein LOC113212797 [Frankliniella occidentalis]	.	.	0	0.0166667	0.66	0	0	0	0	0	0	0.05	1.58	0.26	0.14	0	0	0
Am_Tr_190999	538	.	.	.	0.1	0	0.0933333	0	0	0.3	0	0	0	0	0	0.28	0	0	0	0
Am_Tr_191000	2291	PNY12297.1_G-type lectin S-receptor-like serine/threonine-kinase, partial [Trifolium pratense]	AT1G11330.3_S-locus lectin protein kinase family protein	.	0.11	0.35	0.263333	0.353333	0.19	0.09	0.05	0.42	0.29	0.34	0.22	0.42	0.15	0.48	0.3	0.28
Am_Tr_191001	1673	PNY12297.1_G-type lectin S-receptor-like serine/threonine-kinase, partial [Trifolium pratense]	AT1G11330.3_S-locus lectin protein kinase family protein	IPR003609_PAN/Apple domain; IPR000858_S-locus glycoprotein domain	0.396667	0.686667	0.323333	0.853333	0.34	0.6	0.25	0.87	0.81	0.38	0.19	0.21	0.57	0.85	1.05	0.66
Am_Tr_191002	290	XP_045798116.1_G-type lectin S-receptor-like serine/threonine-protein kinase SD1-13 [Trifolium pratense]	AT1G11300.2_G-type lectin S-receptor-like Serine/Threonine-kinase	.	1.13667	0	0	0.633333	2.3	0	1.11	0	0	0	0	0	0	1.9	0	0
Am_Tr_191003	902	.	.	.	0	0.28	0.08	0.14	0	0	0	0.14	0.46	0.24	0	0	0.24	0.14	0.14	0.14
Am_Tr_191004	345	.	.	.	0	0.28	0.23	0.963333	0	0	0	0	0.84	0	0	0.69	0	0	0.74	2.15
Am_Tr_191005	288	.	AT1G26560.1_beta glucosidase 40, GeneName=BGLU40	.	0.756667	0	0	1.21333	0	0	2.27	0	0	0	0	0	0	2.4	1.24	0
Am_Tr_191006	1604	XP_020965244.1_uncharacterized protein LOC110265975 [Arachis ipaensis] QHO19927.1 Quinone oxidoreductase [Arachis hypogaea]	.	.	1.77	2.14333	1.13	1.71	2.09	1.88	1.34	2.61	1.04	2.78	0.35	0.81	2.23	1.86	2.3	0.97
Am_Tr_191007	1504	XP_020965244.1_uncharacterized protein LOC110265975 [Arachis ipaensis] QHO19927.1 Quinone oxidoreductase [Arachis hypogaea]	.	.	0	0.116667	0.13	0.0866667	0	0	0	0	0.35	0	0	0.39	0	0	0.26	0
Am_Tr_191008	418	.	.	.	0.323333	0.483333	0	0.47	0.97	0	0	0.92	0.53	0	0	0	0	0.47	0	0.94
Am_Tr_191009	446	.	.	.	0.236667	0	0	0	0	0	0.71	0	0	0	0	0	0	0	0	0
Am_Tr_191010	2128	XP_013463930.1_probable receptor-like protein kinase At5g20050 [Medicago truncatula] KEH37965.1 receptor-like kinase [Medicago truncatula] RHN74134.1 putative protein kinase RLK-Pelle-SD-2b family [Medicago truncatula]	AT5G20050.1_Protein kinase superfamily protein	IPR011009_Protein kinase-like domain superfamily; IPR000719_Protein kinase domain	0.673333	0.883333	0.266667	0.256667	0.14	1.57	0.31	2.15	0	0.5	0.19	0.1	0.51	0.77	0	0
Am_Tr_191011	1698	XP_013463930.1_probable receptor-like protein kinase At5g20050 [Medicago truncatula] KEH37965.1 receptor-like kinase [Medicago truncatula] RHN74134.1 putative protein kinase RLK-Pelle-SD-2b family [Medicago truncatula]	AT5G20050.1_Protein kinase superfamily protein	IPR011009_Protein kinase-like domain superfamily; IPR000719_Protein kinase domain	1.93333	6.59333	0.523333	1.20333	0.4	4.28	1.12	12.77	0.92	6.09	0.25	0.55	0.77	2.7	0	0.91
Am_Tr_191012	373	.	.	.	0	1.04	0.726667	0.403333	0	0	0	0	2.07	1.05	0	0.58	1.6	0	0.61	0.6
Am_Tr_191013	438	.	.	.	0.146667	0	0	0.283333	0.44	0	0	0	0	0	0	0	0	0	0	0.85
Am_Tr_191014	594	.	.	.	0.14	0	0.07	0.11	0	0	0.42	0	0	0	0.21	0	0	0.33	0	0
Am_Tr_191015	596	.	.	.	0.0866667	0	0.233333	0.166667	0.26	0	0	0	0	0	0	0.48	0.22	0.5	0	0
Am_Tr_191016	670	.	.	.	0.126667	0	0	0.07	0	0.21	0.17	0	0	0	0	0	0	0	0	0.21
Am_Tr_191017	1234	.	.	.	0.0966667	1.96667	0.0566667	0.18	0.29	0	0	2.46	1.96	1.48	0	0.09	0.08	0.16	0.1	0.28
Am_Tr_191018	334	.	.	.	1.38	0	0	0	1.64	2.5	0	0	0	0	0	0	0	0	0	0
Am_Tr_191019	372	.	.	.	0.593333	0	0.356667	0.206667	1.25	0	0.53	0	0	0	0	0	1.07	0	0.62	0
Am_Tr_191020	266	.	.	.	0.566667	0	0	0	1.7	0	0	0	0	0	0	0	0	0	0	0
Am_Tr_191021	651	.	.	.	0	0	0.283333	0	0	0	0	0	0	0	0.85	0	0	0	0	0
Am_Tr_191022	671	.	.	IPR009003_Peptidase S1, PA clan; IPR001254_Serine proteases, trypsin domain	0	0	0.256667	0	0	0	0	0	0	0	0.77	0	0	0	0	0
Am_Tr_191023	332	.	.	.	0	0	0.67	0.266667	0	0	0	0	0	0	2.01	0	0	0.8	0	0
Am_Tr_191024	216	.	.	.	0	0	0	2.73	0	0	0	0	0	0	0	0	0	4.12	0	4.07
Am_Tr_191025	352	.	.	.	0.716667	0	0	0	2.15	0	0	0	0	0	0	0	0	0	0	0
Am_Tr_191026	588	XP_045799867.1_uncharacterized protein LOC123894041 isoform X2 [Trifolium pratense]	AT5G12930.1_inactive rhomboid protein	.	0	0	0	0	0	0	0	0	0	0	0	0	0	0	0	0
Am_Tr_191027	1574	XP_003597463.2_uncharacterized protein LOC11421473 isoform X2 [Medicago truncatula] AES67714.2 hypothetical protein MTR_2g098330 [Medicago truncatula] RHN76163.1 hypothetical protein MtrunA17_Chr2g0329061 [Medicago truncatula]	AT5G12930.1_inactive rhomboid protein	.	0	0.02	0	0.26	0	0	0	0	0	0.06	0	0	0	0.21	0	0.57
Am_Tr_191028	1821	XP_003597463.2_uncharacterized protein LOC11421473 isoform X2 [Medicago truncatula] AES67714.2 hypothetical protein MTR_2g098330 [Medicago truncatula] RHN76163.1 hypothetical protein MtrunA17_Chr2g0329061 [Medicago truncatula]	AT5G12930.1_inactive rhomboid protein	.	0	0	0.243333	0	0	0	0	0	0	0	0.4	0.22	0.11	0	0	0
Am_Tr_191029	1041	XP_027187816.1_uncharacterized protein LOC101488901 isoform X2 [Cicer arietinum]	AT5G12930.1_inactive rhomboid protein	.	0	0	0.0966667	0	0	0	0	0	0	0	0	0	0.29	0	0	0
Am_Tr_191030	1984	XP_003597463.2_uncharacterized protein LOC11421473 isoform X2 [Medicago truncatula] AES67714.2 hypothetical protein MTR_2g098330 [Medicago truncatula] RHN76163.1 hypothetical protein MtrunA17_Chr2g0329061 [Medicago truncatula]	AT5G12930.1_inactive rhomboid protein	.	0	0	0.103333	0	0	0	0	0	0	0	0	0.31	0	0	0	0
Am_Tr_191031	668	.	.	.	0	0.213333	0.0666667	0.0733333	0	0	0	0.41	0.23	0	0	0.2	0	0	0.22	0
Am_Tr_191032	459	.	.	.	0.133333	0.113333	0.236667	0	0.4	0	0	0	0	0.34	0	0.37	0.34	0	0	0
Am_Tr_191033	466	.	.	.	0	0	0.213333	0.126667	0	0	0	0	0	0	0.64	0	0	0.38	0	0
Am_Tr_191034	1490	XP_004500889.1_uncharacterized protein LOC101490069 [Cicer arietinum]	AT1G76250.1_transmembrane protein	.	0.78	0.23	3.89	0.0133333	1.24	0.17	0.93	0	0.5	0.19	7.7	1.77	2.2	0	0	0.04
Am_Tr_191035	511	.	.	.	0	0.296667	0.0933333	0	0	0	0	0.32	0	0.57	0	0	0.28	0	0	0
Am_Tr_191036	2081	XP_045806358.1_uncharacterized protein LOC123899296 [Trifolium pratense]	AT1G76250.1_transmembrane protein	.	1.84333	0.916667	4.97667	2.93333	0.81	3.24	1.48	0.45	1.17	1.13	2.37	5.77	6.79	2.93	3.42	2.45
Am_Tr_191037	276	.	.	.	0.493333	0	0	0	1.48	0	0	0	0	0	0	0	0	0	0	0
Am_Tr_191038	224	.	.	.	0	0	3.07333	0	0	0	0	0	0	0	5.86	0	3.36	0	0	0
Am_Tr_191039	1350	.	.	.	0.213333	0.37	0.256667	0.17	0.43	0	0.21	0.25	0.56	0.3	0	0.48	0.29	0.34	0	0.17
Am_Tr_191040	1050	.	.	.	0	0.126667	0.593333	0.113333	0	0	0	0	0.38	0	0.86	0.43	0.49	0.34	0	0
Am_Tr_191041	238	.	.	.	1.73667	0	0	0	0	0	5.21	0	0	0	0	0	0	0	0	0
Am_Tr_191042	244	.	.	.	0	0	0	0	0	0	0	0	0	0	0	0	0	0	0	0
Am_Tr_191043	225	.	.	.	0	0	1.09333	0	0	0	0	0	0	0	0	0	3.28	0	0	0
Am_Tr_191044	354	KAF1863410.1_hypothetical protein Lal_00031297 [Lupinus albus]	.	.	0	0.396667	1.04	0.223333	0	0	0	0	0	1.19	0	1.3	1.82	0	0	0.67
Am_Tr_191045	681	.	.	.	0	0.133333	0.06	0.21	0	0	0	0.4	0	0	0	0	0.18	0	0.42	0.21
Am_Tr_191046	1665	PNX63876.1_hypothetical protein L195_g053733, partial [Trifolium pratense]	.	.	0.0766667	0.4	0.273333	0.38	0.07	0	0.16	0.51	0.29	0.4	0	0.37	0.45	0.4	0.41	0.33
Am_Tr_191047	331	.	.	.	0.813333	2.61667	2.85	2.7	0	1.71	0.73	0.8	5.64	1.41	4.05	2.32	2.18	2.41	3.3	2.39
Am_Tr_191048	723	.	.	.	0.0633333	0.07	0.106667	0	0	0.19	0	0	0.21	0	0	0	0.32	0	0	0
Am_Tr_191049	296	.	.	.	0	0	0.676667	0	0	0	0	0	0	0	0	0	2.03	0	0	0
Am_Tr_191050	524	.	.	.	0	0.293333	0	0.21	0	0	0	0.61	0	0.27	0	0	0	0.31	0.32	0
Am_Tr_191051	251	PNX63876.1_hypothetical protein L195_g053733, partial [Trifolium pratense]	.	.	0	0	0.633333	1.31333	0	0	0	0	0	0	0	0	1.9	1.98	0	1.96
Am_Tr_191052	209	.	.	.	0	0	0	0	0	0	0	0	0	0	0	0	0	0	0	0
Am_Tr_191053	1325	XP_027343301.1_dihydroflavonol 4-reductase-like [Abrus precatorius]	.	.	0.316667	0.2	0.08	0.173333	0.44	0.09	0.42	0.17	0.28	0.15	0	0.24	0	0.17	0.26	0.09
Am_Tr_191054	808	RSL47733.1_60S ribosomal protein L19-2 [Fusarium sp. AF-6]	AT4G02230.1_Ribosomal protein L19e family protein	IPR035970_Ribosomal protein L19/L19e superfamily; IPR000196_Ribosomal protein L19/L19e	0	0	0.766667	0	0	0	0	0	0	0	2.16	0	0.14	0	0	0
Am_Tr_191055	951	TIC91691.1_60S ribosomal protein L19-2 [Colletotrichum higginsianum]	AT4G02230.1_Ribosomal protein L19e family protein	IPR000196_Ribosomal protein L19/L19e; IPR035970_Ribosomal protein L19/L19e superfamily	0.0366667	0.24	13.6067	0.12	0	0	0.11	0.38	0	0.34	22.19	6.28	12.35	0	0	0.36
Am_Tr_191056	235	KAH0563458.1_60S ribosomal protein L19A [Trichoglossum hirsutum]	AT1G02780.1_Ribosomal protein L19e family protein, GeneName=emb2386	.	0	1.13667	0	0	0	0	0	0	3.41	0	0	0	0	0	0	0
Am_Tr_191057	1107	RSL47733.1_60S ribosomal protein L19-2 [Fusarium sp. AF-6]	AT4G02230.1_Ribosomal protein L19e family protein	IPR000196_Ribosomal protein L19/L19e; IPR035970_Ribosomal protein L19/L19e superfamily	7.57333	0	0	0	0.44	2.5	19.78	0	0	0	0	0	0	0	0	0
Am_Tr_191058	935	RSL47733.1_60S ribosomal protein L19-2 [Fusarium sp. AF-6]	AT4G02230.1_Ribosomal protein L19e family protein	IPR035970_Ribosomal protein L19/L19e superfamily; IPR000196_Ribosomal protein L19/L19e	0.306667	0.05	0	0.186667	0	0	0.92	0	0.15	0	0	0	0	0	0	0.56
Am_Tr_191059	203	XP_016625166.1_hypothetical protein Z519_00158 [Cladophialophora bantiana CBS 173.52] KIW98497.1 hypothetical protein Z519_00158 [Cladophialophora bantiana CBS 173.52]	.	.	0	0	0	0	0	0	0	0	0	0	0	0	0	0	0	0
Am_Tr_191060	2350	XP_027365671.1_uncharacterized protein LOC113872366 isoform X1 [Abrus precatorius]	AT3G22970.1_hypothetical protein (DUF506)	IPR006502_Protein of unknown function PDDEXK-like	1.93333	0.266667	0.21	0.62	0.96	0.63	4.21	0	0.58	0.22	0	0.44	0.19	0.96	0.26	0.64
Am_Tr_191061	2254	XP_027365671.1_uncharacterized protein LOC113872366 isoform X1 [Abrus precatorius]	AT3G22970.1_hypothetical protein (DUF506)	IPR006502_Protein of unknown function PDDEXK-like	12.03	2.56	2.32667	5.22333	2.57	9.08	24.44	4.83	0.46	2.39	0	3.22	3.76	6.45	2.07	7.15
Am_Tr_191062	2225	XP_027365671.1_uncharacterized protein LOC113872366 isoform X1 [Abrus precatorius]	AT3G22970.1_hypothetical protein (DUF506)	IPR006502_Protein of unknown function PDDEXK-like	2.88	1.05	1.03667	4.76333	0.91	7.73	0	2.58	0.57	0	1.98	1.13	0	11.15	3.14	0
Am_Tr_191063	2321	XP_027365671.1_uncharacterized protein LOC113872366 isoform X1 [Abrus precatorius]	AT3G22970.1_hypothetical protein (DUF506)	IPR006502_Protein of unknown function PDDEXK-like	0.203333	0.2	0.386667	0.506667	0.33	0.28	0	0	0.6	0	0.96	0.2	0	1.26	0.26	0
Am_Tr_191064	2306	XP_027365671.1_uncharacterized protein LOC113872366 isoform X1 [Abrus precatorius]	AT3G22970.1_hypothetical protein (DUF506)	IPR006502_Protein of unknown function PDDEXK-like	0.25	0.113333	0.176667	0.146667	0.13	0.62	0	0.04	0.3	0	0.46	0.07	0	0	0.44	0
Am_Tr_191065	2335	XP_027365671.1_uncharacterized protein LOC113872366 isoform X1 [Abrus precatorius]	AT3G22970.1_hypothetical protein (DUF506)	IPR006502_Protein of unknown function PDDEXK-like	1.55	0.283333	0.233333	0.15	0.44	1.37	2.84	0.06	0.3	0.49	0	0.21	0.49	0	0.45	0
Am_Tr_191066	2378	XP_013449816.1_uncharacterized protein LOC25499188 [Medicago truncatula] KEH23844.1 DUF506 family protein [Medicago truncatula] RHN48138.1 hypothetical protein MtrunA17_Chr7g0260551 [Medicago truncatula]	AT3G22970.1_hypothetical protein (DUF506)	IPR006502_Protein of unknown function PDDEXK-like	2.43667	0.96	0.9	1.18	2.47	1.18	3.66	1.28	1.24	0.36	0.92	0.86	0.92	1.07	1.24	1.23
Am_Tr_191067	2141	XP_004493733.1_uncharacterized protein LOC101501573 [Cicer arietinum]	AT2G38820.2_DNA-directed RNA polymerase subunit beta-beta protein, putative (DUF506)	IPR006502_Protein of unknown function PDDEXK-like	75.46	42.8567	22.6233	53.0133	57.31	65.31	103.76	60.47	37.75	30.35	14.01	27.18	26.68	62.02	58.62	38.4
Am_Tr_191068	1039	XP_027365671.1_uncharacterized protein LOC113872366 isoform X1 [Abrus precatorius]	AT3G22970.1_hypothetical protein (DUF506)	.	0	0.0333333	0	1.01667	0	0	0	0.1	0	0	0	0	0	1.3	0.85	0.9
Am_Tr_191069	308	.	.	.	0	0	0	0	0	0	0	0	0	0	0	0	0	0	0	0
Am_Tr_191070	820	.	.	.	0	0.153333	0	0.0533333	0	0	0	0.46	0	0	0	0	0	0	0	0.16
Am_Tr_191071	282	.	.	.	0	0	0	0	0	0	0	0	0	0	0	0	0	0	0	0
Am_Tr_191072	357	.	.	.	0.196667	0.22	0	0	0	0	0.59	0.66	0	0	0	0	0	0	0	0
Am_Tr_191073	842	.	.	.	0.133333	0	0.27	0.05	0	0.15	0.25	0	0	0	0	0.29	0.52	0	0	0.15
Am_Tr_191074	288	.	.	.	0	0	0	0	0	0	0	0	0	0	0	0	0	0	0	0
Am_Tr_191075	369	.	.	.	0	0	0.393333	0	0	0	0	0	0	0	0	1.18	0	0	0	0
Am_Tr_191076	375	.	.	.	0	0	0.663333	0	0	0	0	0	0	0	1.99	0	0	0	0	0
Am_Tr_191077	533	.	.	.	0	0	0	0	0	0	0	0	0	0	0	0	0	0	0	0
Am_Tr_191078	595	.	.	.	0	0	0.773333	0	0	0	0	0	0	0	0.21	1.67	0.44	0	0	0
Am_Tr_191079	1312	XP_046129491.1_DNA-directed RNA polymerase [Fusarium solani] KAH7250467.1 DNA-directed RNA polymerase [Fusarium solani]	AT2G15430.3_DNA-directed RNA polymerase family protein, GeneName=NRPB3	IPR011263_DNA-directed RNA polymerase, RpoA/D/Rpb3-type; IPR011262_DNA-directed RNA polymerase, insert domain; IPR036643_DNA-directed RNA polymerase, insert domain superfamily; IPR036603_RNA polymerase, RBP11-like subunit	0.696667	0	0	0	0	0.18	1.91	0	0	0	0	0	0	0	0	0
Am_Tr_191080	1111	XP_035330032.1_RNA polymerase Rpb3/RpoA insert domain-containing protein [Colletotrichum scovillei] KAF4777029.1 RNA polymerase Rpb3/RpoA insert domain-containing protein [Colletotrichum scovillei] KAG7053987.1 RNA polymerase Rpb3/RpoA insert domain-containing protein [Colletotrichum scovillei] KAG7072290.1 RNA polymerase Rpb3/RpoA insert domain-containing protein [Colletotrichum scovillei] KAG70…	AT2G15430.1_DNA-directed RNA polymerase family protein, GeneName=NRPB3	IPR011262_DNA-directed RNA polymerase, insert domain; IPR036603_RNA polymerase, RBP11-like subunit; IPR011263_DNA-directed RNA polymerase, RpoA/D/Rpb3-type; IPR036643_DNA-directed RNA polymerase, insert domain superfamily	0	0	0.5	0	0	0	0	0	0	0	0.63	0.51	0.36	0	0	0
Am_Tr_191081	431	KAF4313277.1_ATPase V0 complex proteolipid subunit C [Botryosphaeria dothidea]	AT2G16510.1_ATPase, F0/V0 complex, subunit C protein	IPR002379_V-ATPase proteolipid subunit C-like domain; IPR000245_V-ATPase proteolipid subunit; IPR035921_F/V-ATP synthase subunit C superfamily; IPR011555_V-ATPase proteolipid subunit C, eukaryotic	0	0	0.616667	0	0	0	0	0	0	0	1.85	0	0	0	0	0
Am_Tr_191082	385	.	.	.	0.163333	0	0	0	0	0	0.49	0	0	0	0	0	0	0	0	0
Am_Tr_191083	382	.	.	.	0	0	0.166667	0	0	0	0	0	0	0	0	0	0.5	0	0	0
Am_Tr_191084	659	.	.	.	0	0.333333	0.376667	0.0733333	0	0	0	0	0.24	0.76	0	0.2	0.93	0	0	0.22
Am_Tr_191085	203	.	.	.	0	0	6.01667	0	0	0	0	0	0	0	5.41	12.64	0	0	0	0
Am_Tr_191086	1168	XP_046136706.1_vesicular-fusion protein sec17 [Fusarium solani] KAH7272089.1 vesicular-fusion protein sec17 [Fusarium solani]	AT3G56190.1_alpha-soluble NSF attachment protein 2, GeneName=ALPHA-SNAP2	IPR011990_Tetratricopeptide-like helical domain superfamily; IPR000744_NSF attachment protein	0.636667	0	0	0	0	0.2	1.71	0	0	0	0	0	0	0	0	0
Am_Tr_191087	1423	KXH45386.1_alpha-soluble NSF attachment protein [Colletotrichum simmondsii]	AT3G56190.1_alpha-soluble NSF attachment protein 2, GeneName=ALPHA-SNAP2	IPR000744_NSF attachment protein; IPR011990_Tetratricopeptide-like helical domain superfamily	0.0266667	0	0.826667	0	0	0.08	0	0	0	0	1.52	0.22	0.74	0	0	0
Am_Tr_191088	449	.	.	.	0	0	0.593333	0	0	0	0	0	0	0	1.03	0.39	0.36	0	0	0
Am_Tr_191089	260	.	.	.	1.70667	0	1.03667	1.19	0	0	5.12	0	0	0	1.47	0	1.64	0	3.57	0
Am_Tr_191090	343	.	.	.	0	0	0	0	0	0	0	0	0	0	0	0	0	0	0	0
Am_Tr_191091	231	.	.	.	3.06	1.73	0	0	0	0	9.18	0	0	5.19	0	0	0	0	0	0
Am_Tr_191092	431	.	.	.	0.403333	0	0	0.146667	0.45	0	0.76	0	0	0	0	0	0	0	0	0.44
Am_Tr_191093	249	.	.	.	0	0.703333	0	0	0	0	0	2.11	0	0	0	0	0	0	0	0
Am_Tr_191094	910	XP_022636833.1_uncharacterized protein LOC111241685 [Vigna radiata var. radiata]	ATMG00850.1_DNA/RNA polymerases superfamily protein, GeneName=ORF107E	IPR000477_Reverse transcriptase domain; IPR043502_DNA/RNA polymerase superfamily	0.0366667	0.05	0.04	0.186667	0	0	0.11	0	0.15	0	0	0	0.12	0.28	0	0.28
Am_Tr_191095	2938	KOM50008.1_hypothetical protein LR48_Vigan08g083500 [Vigna angularis]	ATMG00860.1_DNA/RNA polymerases superfamily protein, GeneName=ORF158	IPR041577_Reverse transcriptase/retrotransposon-derived protein, RNase H-like domain; IPR043502_DNA/RNA polymerase superfamily; IPR000477_Reverse transcriptase domain	0.173333	0.153333	0.0633333	0.19	0.14	0.21	0.17	0.24	0.19	0.03	0.03	0.07	0.09	0.14	0.25	0.18
Am_Tr_191096	1360	GEX24785.1_putative mitochondrial protein [Tanacetum cinerariifolium]	AT3G30770.1_Eukaryotic aspartyl protease family protein	.	0.0266667	0.413333	0.123333	0.17	0.08	0	0	0.32	0.55	0.37	0	0.16	0.21	0.17	0.09	0.25
Am_Tr_191097	829	XP_017420141.1_PREDICTED: uncharacterized protein LOC108330141 [Vigna angularis]	AT3G30770.1_Eukaryotic aspartyl protease family protein	IPR021109_Aspartic peptidase domain superfamily	0	0	0	0	0	0	0	0	0	0	0	0	0	0	0	0
Am_Tr_191098	826	XP_017417578.1_PREDICTED: uncharacterized protein LOC108328253 [Vigna angularis]	ATMG00850.1_DNA/RNA polymerases superfamily protein, GeneName=ORF107E	IPR043502_DNA/RNA polymerase superfamily	0	0.21	0.0433333	0	0	0	0	0.46	0.17	0	0.13	0	0	0	0	0
Am_Tr_191099	212	KAG6548064.1_hypothetical protein Mapa_010498 [Marchantia paleacea]	AT1G15250.2_Zinc-binding ribosomal protein family protein	.	0	0	0	0	0	0	0	0	0	0	0	0	0	0	0	0
Am_Tr_191100	215	VVA26609.1_PREDICTED: aminoacylase-1 [Prunus dulcis]	AT1G44180.1_Peptidase M20/M25/M40 family protein	.	0	0	0	1.41333	0	0	0	0	0	0	0	0	0	4.24	0	0
Am_Tr_191101	624	.	.	.	0.16	0.446667	0.0666667	0.236667	0.24	0.24	0	0	0.52	0.82	0.2	0	0	0	0.48	0.23
Am_Tr_191102	321	GAU12107.1_hypothetical protein TSUD_00730 [Trifolium subterraneum]	.	.	0	0	0	0	0	0	0	0	0	0	0	0	0	0	0	0
Am_Tr_191103	233	MCE0481479.1_choline dehydrogenase 3 [Datura stramonium]	AT2G25170.1_chromatin remodeling factor CHD3 (PICKLE), GeneName=PKL	.	0.973333	0	0.903333	0	0	0	2.92	0	0	0	0	0	2.71	0	0	0
Am_Tr_191104	343	MCE0481479.1_choline dehydrogenase 3 [Datura stramonium]	AT2G25170.1_chromatin remodeling factor CHD3 (PICKLE), GeneName=PKL	.	0	0	0	0	0	0	0	0	0	0	0	0	0	0	0	0
Am_Tr_191105	556	.	.	.	0.48	0	0	0	0	1.44	0	0	0	0	0	0	0	0	0	0
Am_Tr_191106	377	XP_002508204.1_predicted protein [Micromonas commoda] ACO69462.1 predicted protein [Micromonas commoda]	AT5G35530.1_Ribosomal protein S3 family protein	IPR009019_K homology domain superfamily, prokaryotic type; IPR004044_K Homology domain, type 2; IPR036419_Ribosomal protein S3, C-terminal domain superfamily	0	0	0	0	0	0	0	0	0	0	0	0	0	0	0	0
Am_Tr_191107	298	WP_164913535.1_KH domain-containing protein, partial [Sphingomonas sp. UV9] RXD01355.1 30S ribosomal protein S3, partial [Sphingomonas sp. UV9]	AT5G35530.1_Ribosomal protein S3 family protein	.	0	0	0	1.44333	0	0	0	0	0	0	0	0	0	0	1.11	3.22
Am_Tr_191108	690	KAG8375731.1_hypothetical protein BUALT_Bualt10G0130900 [Buddleja alternifolia]	AT3G53870.1_Ribosomal protein S3 family protein	IPR036419_Ribosomal protein S3, C-terminal domain superfamily; IPR005703_Ribosomal protein S3, eukaryotic/archaeal; IPR009019_K homology domain superfamily, prokaryotic type; IPR001351_Ribosomal protein S3, C-terminal; IPR004044_K Homology domain, type 2	0	0.27	0.0566667	0.573333	0	0	0	0.59	0.22	0	0	0	0.17	1.51	0.21	0
Am_Tr_191109	690	POF11020.1_40s ribosomal protein s3-3 [Quercus suber]	AT3G53870.1_Ribosomal protein S3 family protein	IPR009019_K homology domain superfamily, prokaryotic type; IPR036419_Ribosomal protein S3, C-terminal domain superfamily; IPR004044_K Homology domain, type 2; IPR005703_Ribosomal protein S3, eukaryotic/archaeal; IPR001351_Ribosomal protein S3, C-terminal	0	0.0733333	0.0566667	0.37	0	0	0	0	0.22	0	0	0	0.17	0.5	0.41	0.2
Am_Tr_191110	238	KAF9117670.1_40S ribosomal protein S3, partial [Mortierella sp. 14UC]	AT2G31610.1_Ribosomal protein S3 family protein	.	0	0	0	0.833333	0	0	0	0	0	0	0	0	0	2.5	0	0
Am_Tr_191111	596	.	.	.	0.413333	0.146667	0.443333	0.0866667	0.77	0.26	0.21	0	0	0.44	0.42	0.48	0.43	0	0.26	0
Am_Tr_191112	632	.	.	.	0	0	0	0	0	0	0	0	0	0	0	0	0	0	0	0
Am_Tr_191113	252	.	.	.	3.42	0	0.623333	0	0	4.37	5.89	0	0	0	0	0	1.87	0	0	0
Am_Tr_191114	476	.	.	.	0	2.84667	0.526667	0	0	0	0	3.59	2.06	2.89	1.23	0.35	0	0	0	0
Am_Tr_191115	787	.	.	.	0	2.72	0.263333	0.79	0	0	0	0.98	7.03	0.15	0	0.79	0	1	1.37	0
Am_Tr_191116	639	.	.	.	0	0	0.54	0.15	0	0	0	0	0	0	1.13	0.3	0.19	0	0	0.45
Am_Tr_191117	725	.	.	.	0	0	0.21	0	0	0	0	0	0	0	0	0.47	0.16	0	0	0
Am_Tr_191118	220	.	.	.	0	0	1.08	0	0	0	0	0	0	0	3.24	0	0	0	0	0
Am_Tr_191119	240	.	.	.	0	0.83	3.16333	0.803333	0	0	0	2.49	0	0	0	4.81	4.68	2.41	0	0
Am_Tr_191120	312	.	.	.	0	0.276667	0	0.313333	0	0	0	0	0	0.83	0	0	0	0	0	0.94
Am_Tr_191121	1388	.	.	.	0	0.173333	0.1	0	0	0	0	0.32	0.13	0.07	0.09	0.1	0.11	0	0	0
Am_Tr_191122	741	.	.	.	0	0.293333	1.87	0.793333	0	0	0	0	0.72	0.16	3.31	0.99	1.31	1.64	0.37	0.37
Am_Tr_191123	368	.	.	.	0	0.203333	0	0	0	0	0	0.61	0	0	0	0	0	0	0	0
Am_Tr_191124	555	.	.	.	0	0	0	0	0	0	0	0	0	0	0	0	0	0	0	0
Am_Tr_191125	2494	XP_026292895.1_inter-alpha-trypsin inhibitor heavy chain H4-like [Frankliniella occidentalis]	AT1G19110.1_inter-alpha-trypsin inhibitor heavy chain-like protein	IPR013694_VIT domain; IPR036465_von Willebrand factor A-like domain superfamily; IPR002035_von Willebrand factor, type A	0	0	0.223333	0	0	0	0	0	0	0	0.67	0	0	0	0	0
Am_Tr_191126	2385	XP_026292895.1_inter-alpha-trypsin inhibitor heavy chain H4-like [Frankliniella occidentalis]	AT1G19110.1_inter-alpha-trypsin inhibitor heavy chain-like protein	IPR013694_VIT domain; IPR036465_von Willebrand factor A-like domain superfamily; IPR002035_von Willebrand factor, type A	0	0	11.89	0	0	0	0	0	0	0	34.67	0.96	0.04	0	0	0
Am_Tr_191127	2523	XP_026292895.1_inter-alpha-trypsin inhibitor heavy chain H4-like [Frankliniella occidentalis]	AT1G19110.1_inter-alpha-trypsin inhibitor heavy chain-like protein	IPR002035_von Willebrand factor, type A; IPR013694_VIT domain; IPR036465_von Willebrand factor A-like domain superfamily	0	0	4.27333	0	0	0	0	0	0	0	12.82	0	0	0	0	0
Am_Tr_191128	1202	KEH35142.1_disease resistance protein (TIR-NBS-LRR class), putative [Medicago truncatula]	AT5G17680.2_disease resistance protein (TIR-NBS-LRR class)	IPR027417_P-loop containing nucleoside triphosphate hydrolase; IPR002182_NB-ARC	0.86	0.0366667	0.113333	0.0333333	2.16	0.1	0.32	0	0.11	0	0	0.09	0.25	0	0.1	0
Am_Tr_191129	429	.	.	.	0.153333	0	0.13	0	0	0.46	0	0	0	0	0	0	0.39	0	0	0
Am_Tr_191130	243	.	.	.	0	2.25	0	0	0	0	0	4.71	0	2.04	0	0	0	0	0	0
Am_Tr_191131	287	.	.	.	0	0.41	0.376667	0	0	0	0	1.23	0	0	0	0	1.13	0	0	0
Am_Tr_191132	228	KAF1882838.1_hypothetical protein Lal_00003019 [Lupinus albus]	.	.	0	5.89	0	0	0	0	0	9.66	8.01	0	0	0	0	0	0	0
Am_Tr_191133	820	.	.	.	0	0	0.45	0	0	0	0	0	0	0	1.06	0.15	0.14	0	0	0
Am_Tr_191134	780	.	.	.	0	0	0.956667	0	0	0	0	0	0	0	2.55	0.32	0	0	0	0
Am_Tr_191135	1972	XP_046136560.1_uncharacterized protein B0J15DRAFT_480526 [Fusarium solani] KAH7271943.1 hypothetical protein B0J15DRAFT_480526 [Fusarium solani]	AT5G03160.1_DnaJ P58IPK-like protein, GeneName=P58IPK	IPR001623_DnaJ domain; IPR011990_Tetratricopeptide-like helical domain superfamily; IPR019734_Tetratricopeptide repeat; IPR036869_Chaperone J-domain superfamily	0.983333	0	0	0	0	0.27	2.68	0	0	0	0	0	0	0	0	0
Am_Tr_191136	282	.	.	.	0.41	0	0	0	0	0	1.23	0	0	0	0	0	0	0	0	0
Am_Tr_191137	610	.	.	.	0	0	0.146667	0	0	0	0	0	0	0	0	0.23	0.21	0	0	0
Am_Tr_191138	745	MPY69929.1_choice-of-anchor A family protein [Alphaproteobacteria bacterium]	.	IPR026588_Choice-of-anchor A domain	0	0	0	0.843333	0	0	0	0	0	0	0	0	0	1.08	0	1.45
Am_Tr_191139	299	GAU11523.1_hypothetical protein TSUD_345130 [Trifolium subterraneum]	AT1G09000.2_NPK1-related protein kinase 1, GeneName=NP1	.	0.78	0	0	0	2.34	0	0	0	0	0	0	0	0	0	0	0
Am_Tr_191140	214	GAU11523.1_hypothetical protein TSUD_345130 [Trifolium subterraneum]	AT1G09000.2_NPK1-related protein kinase 1, GeneName=NP1	.	8.20333	0	0	0	14.84	0	9.77	0	0	0	0	0	0	0	0	0
Am_Tr_191141	1221	XP_004494615.1_mitogen-activated protein kinase kinase kinase NPK1 [Cicer arietinum] XP_027188613.1 mitogen-activated protein kinase kinase kinase NPK1 [Cicer arietinum]	AT1G09000.2_NPK1-related protein kinase 1, GeneName=NP1	IPR000719_Protein kinase domain; IPR011009_Protein kinase-like domain superfamily	0	0	0	0	0	0	0	0	0	0	0	0	0	0	0	0
Am_Tr_191142	1169	XP_004494615.1_mitogen-activated protein kinase kinase kinase NPK1 [Cicer arietinum] XP_027188613.1 mitogen-activated protein kinase kinase kinase NPK1 [Cicer arietinum]	AT1G09000.2_NPK1-related protein kinase 1, GeneName=NP1	IPR000719_Protein kinase domain; IPR011009_Protein kinase-like domain superfamily	0.656667	0	0.106667	0.04	1.97	0	0	0	0	0	0.32	0	0	0	0.12	0
Am_Tr_191143	1198	XP_004494615.1_mitogen-activated protein kinase kinase kinase NPK1 [Cicer arietinum] XP_027188613.1 mitogen-activated protein kinase kinase kinase NPK1 [Cicer arietinum]	AT1G09000.2_NPK1-related protein kinase 1, GeneName=NP1	IPR000719_Protein kinase domain; IPR011009_Protein kinase-like domain superfamily	0	0	0	0.1	0	0	0	0	0	0	0	0	0	0	0.3	0
Am_Tr_191144	1250	XP_004494615.1_mitogen-activated protein kinase kinase kinase NPK1 [Cicer arietinum] XP_027188613.1 mitogen-activated protein kinase kinase kinase NPK1 [Cicer arietinum]	AT1G09000.2_NPK1-related protein kinase 1, GeneName=NP1	IPR000719_Protein kinase domain; IPR011009_Protein kinase-like domain superfamily	0.266667	0	0	0	0	0	0.8	0	0	0	0	0	0	0	0	0
Am_Tr_191145	1141	RZB69040.1_Mitogen-activated protein kinase kinase kinase 3 [Glycine soja]	AT1G09000.2_NPK1-related protein kinase 1, GeneName=NP1	IPR011009_Protein kinase-like domain superfamily	0.476667	0.14	0	0.0766667	1.03	0.31	0.09	0.19	0.23	0	0	0	0	0.23	0	0
Am_Tr_191146	964	XP_004494615.1_mitogen-activated protein kinase kinase kinase NPK1 [Cicer arietinum] XP_027188613.1 mitogen-activated protein kinase kinase kinase NPK1 [Cicer arietinum]	AT1G09000.2_NPK1-related protein kinase 1, GeneName=NP1	IPR000719_Protein kinase domain; IPR011009_Protein kinase-like domain superfamily	0.253333	0.68	0.656667	0.3	0	0	0.76	0	0.14	1.9	0	0.66	1.31	0	0	0.9
Am_Tr_191147	935	XP_004494615.1_mitogen-activated protein kinase kinase kinase NPK1 [Cicer arietinum] XP_027188613.1 mitogen-activated protein kinase kinase kinase NPK1 [Cicer arietinum]	AT1G09000.2_NPK1-related protein kinase 1, GeneName=NP1	IPR000719_Protein kinase domain; IPR011009_Protein kinase-like domain superfamily	1.7	0.706667	0.423333	0.473333	5.1	0	0	1.69	0.43	0	0.57	0.7	0	0.9	0.52	0
Am_Tr_191148	482	XP_001993031.1_vitellogenin-1 isoform X2 [Drosophila grimshawi] EDV98956.1 GH13312 [Drosophila grimshawi]	.	.	0	0	0.3	0	0	0	0	0	0	0	0.9	0	0	0	0	0
Am_Tr_191149	247	KAF5344122.1_hypothetical protein D9758_008848 [Tetrapyrgos nigripes]	AT1G74060.1_Ribosomal protein L6 family protein	.	0.72	0	0	0	0	0	2.16	0	0	0	0	0	0	0	0	0
Am_Tr_191150	324	PAV68320.1_hypothetical protein WR25_12959 [Diploscapter pachys]	AT1G18540.1_Ribosomal protein L6 family protein	IPR008991_Translation protein SH3-like domain superfamily; IPR000915_60S ribosomal protein L6E	0.303333	0	0	0	0	0.91	0	0	0	0	0	0	0	0	0	0
Am_Tr_191151	664	XP_004340229.1_ribosomal protein L6e, putative [Acanthamoeba castellanii str. Neff] ELR18209.1 ribosomal protein L6e, putative [Acanthamoeba castellanii str. Neff]	AT1G74060.1_Ribosomal protein L6 family protein	IPR000915_60S ribosomal protein L6E; IPR008991_Translation protein SH3-like domain superfamily	0	0	0	0.713333	0	0	0	0	0	0	0	0	0	1.28	0	0.86
Am_Tr_191152	237	.	.	.	0	0	0	0	0	0	0	0	0	0	0	0	0	0	0	0
Am_Tr_191153	248	.	.	.	1.53667	0	0	0	2.27	2.34	0	0	0	0	0	0	0	0	0	0
Am_Tr_191154	2002	.	.	.	0	0	0	0	0	0	0	0	0	0	0	0	0	0	0	0
Am_Tr_191155	527	.	.	.	0	0.38	0.193333	0.103333	0	0	0	0.6	0.54	0	0	0.58	0	0	0.31	0
Am_Tr_191156	483	.	.	.	0.2	0.52	0.416667	0.12	0	0	0.6	0	0	1.56	0.6	0.34	0.31	0.36	0	0
Am_Tr_191157	386	.	.	.	0.19	0.423333	0	0	0.57	0	0	0	1.27	0	0	0	0	0	0	0
Am_Tr_191158	307	.	.	.	0	0.99	0	0	0	0	0	2.97	0	0	0	0	0	0	0	0
Am_Tr_191159	348	.	.	.	0	0	0	0	0	0	0	0	0	0	0	0	0	0	0	0
Am_Tr_191160	387	.	.	.	0.483333	0.533333	0	0.55	0	0	1.45	0	0.63	0.97	0	0	0	1.1	0	0.55
Am_Tr_191161	326	.	.	.	0.296667	0	0	0	0	0.89	0	0	0	0	0	0	0	0	0	0
Am_Tr_191162	1585	XP_003051096.1_uncharacterized protein NECHADRAFT_60964 [Fusarium vanettenii 77-13-4] EEU45383.1 hypothetical protein NECHADRAFT_60964 [Fusarium vanettenii 77-13-4]	.	IPR007568_RTA-like protein	0.833333	0	0	0	0	0.35	2.15	0	0	0	0	0	0	0	0	0
Am_Tr_191163	453	.	.	.	0.253333	0	0	0.4	0	0.42	0.34	0	0	0	0	0	0	1.2	0	0
Am_Tr_191164	425	.	.	.	0	0	0.523333	0.153333	0	0	0	0	0	0	1.14	0.43	0	0	0.46	0
Am_Tr_191165	554	.	.	.	0	0	0	0	0	0	0	0	0	0	0	0	0	0	0	0
Am_Tr_191166	609	.	.	.	0.203333	0	0.73	0	0	0	0.61	0	0	0	0.41	1.15	0.63	0	0	0
Am_Tr_191167	555	.	.	.	0.386667	0	0	0	0.58	0.58	0	0	0	0	0	0	0	0	0	0
Am_Tr_191168	734	.	.	.	0.05	0	0	0	0	0	0.15	0	0	0	0	0	0	0	0	0
Am_Tr_191169	532	.	.	.	0	0.0866667	0.0866667	0	0	0	0	0	0	0.26	0	0	0.26	0	0	0
Am_Tr_191170	355	.	.	.	0.2	1.52333	0.82	0.446667	0	0	0.6	0.67	3.9	0	0.57	1.29	0.6	0	0	1.34
Am_Tr_191171	587	XP_001023112.2_hypothetical protein TTHERM_00353560 [Tetrahymena thermophila SB210] EAS02867.2 hypothetical protein TTHERM_00353560 [Tetrahymena thermophila SB210]	.	.	0	0	0.216667	0.256667	0	0	0	0	0	0	0.65	0	0	0.51	0.26	0
Am_Tr_191172	954	XP_046140258.1_uncharacterized protein B0J15DRAFT_21087 [Fusarium solani] KAH7275641.1 hypothetical protein B0J15DRAFT_21087 [Fusarium solani]	.	IPR008972_Cupredoxin	1.90333	0	0	0	0	0	5.71	0	0	0	0	0	0	0	0	0
Am_Tr_191173	821	XP_025489974.1_P-loop containing nucleoside triphosphate hydrolase protein [Aspergillus uvarum CBS 121591] XP_025529629.1 P-loop containing nucleoside triphosphate hydrolase protein [Aspergillus japonicus CBS 114.51] XP_040665928.1 uncharacterized protein ASPVEDRAFT_550408 [Aspergillus versicolor CBS 583.65] OJJ00166.1 hypothetical protein ASPVEDRAFT_550408 [Aspergillus versicolor CBS 583.65] PYH…	AT1G72730.1_DEA(D/H)-box RNA helicase family protein	IPR027417_P-loop containing nucleoside triphosphate hydrolase; IPR001650_Helicase, C-terminal	0	0.14	0.76	0	0	0	0	0	0	0.42	1.98	0.3	0	0	0	0
Am_Tr_191174	716	MBE3042217.1_hypothetical protein [Candidatus Bathyarchaeota archaeon]	AT3G19760.1_eukaryotic initiation factor 4A-III, GeneName=EIF4A-III	.	0	0.0566667	8.62667	0.193333	0	0	0	0	0	0.17	15.66	2.17	8.05	0	0	0.58
Am_Tr_191175	468	MBE3042217.1_hypothetical protein [Candidatus Bathyarchaeota archaeon]	AT3G19760.1_eukaryotic initiation factor 4A-III, GeneName=EIF4A-III	.	0	0	0	0.516667	0	0	0	0	0	0	0	0	0	0	1.55	0
Am_Tr_191176	446	CCW67443.1_unnamed protein product [Phytomonas sp. isolate Hart1]	.	IPR002108_Actin-depolymerising factor homology domain	0.57	0	0	0	0.85	0.86	0	0	0	0	0	0	0	0	0	0
Am_Tr_191177	411	.	.	.	0	0	0.716667	0	0	0	0	0	0	0	1.22	0.93	0	0	0	0
Am_Tr_191178	245	.	.	.	0	0	0	0.733333	0	0	0	0	0	0	0	0	0	2.2	0	0
Am_Tr_191179	401	XP_007730968.1_calmodulin [Capronia epimyces CBS 606.96] KAG9809300.1 hypothetical protein KCU68_g21320, partial [Aureobasidium melanogenum] KUM63044.1 hypothetical protein ACN42_g4054 [Penicillium freii] EXJ89571.1 calmodulin [Capronia epimyces CBS 606.96] KAG9887077.1 hypothetical protein KCV05_g19221, partial [Aureobasidium melanogenum] KAG9940180.1 hypothetical protein KCU98_g19218, partial […	AT1G66410.3_calmodulin 4, GeneName=CAM4	.	0	0	0	0.68	0	0	0	0	0	0	0	0	0	0.51	0	1.53
Am_Tr_191180	3204	PNX92398.1_Ty3/gypsy retrotransposon protein [Trifolium pratense]	.	IPR043502_DNA/RNA polymerase superfamily	0.13	0.166667	0.0533333	0.0866667	0.29	0.1	0	0.44	0	0.06	0.05	0.06	0.05	0.06	0.07	0.13
Am_Tr_191181	1401	KAH1142575.1_hypothetical protein GYH30_033331 [Glycine max] KAH1220921.1 hypothetical protein GmHk_12G034449 [Glycine max]	.	.	1.34333	0.806667	0.416667	0.426667	3.91	0.12	0	2.33	0.09	0	1.11	0	0.14	1.28	0	0
Am_Tr_191182	1200	.	.	.	0.553333	0.933333	0.44	0.553333	0.69	0.1	0.87	1.23	0.75	0.82	0.37	0.28	0.67	0.19	0.5	0.97
Am_Tr_191183	576	.	AT3G19170.2_presequence protease 1, GeneName=PREP1	.	0	0.16	0.226667	0	0	0	0	0	0	0.48	0	0	0.68	0	0	0
Am_Tr_191184	467	.	.	.	0	0.146667	0.04	0.26	0	0	0	0	0	0.44	0.12	0	0	0	0	0.78
Am_Tr_191185	224	.	.	.	0	0	0	0	0	0	0	0	0	0	0	0	0	0	0	0
Am_Tr_191186	618	.	.	.	0	0.0866667	0	0	0	0	0	0	0.26	0	0	0	0	0	0	0
Am_Tr_191187	409	.	.	.	0.17	0.72	0.72	0.653333	0.51	0	0	0.48	1.68	0	0.82	0.47	0.87	0.98	0	0.98
Am_Tr_191188	581	.	.	.	0	0.0866667	0	0	0	0	0	0.26	0	0	0	0	0	0	0	0
Am_Tr_191189	622	.	.	.	0	0	0	0	0	0	0	0	0	0	0	0	0	0	0	0
Am_Tr_191190	586	.	.	.	0	0	0	0	0	0	0	0	0	0	0	0	0	0	0	0
Am_Tr_191191	436	.	.	.	0	0.52	0.136667	0.146667	0	0	0	0.42	0	1.14	0	0.41	0	0	0.44	0
Am_Tr_191192	239	.	.	.	0	2.08667	0	0	0	0	0	0	6.26	0	0	0	0	0	0	0
Am_Tr_191193	485	.	.	.	0	0	0.42	0.353333	0	0	0	0	0	0	0.59	0.67	0	1.06	0	0
Am_Tr_191194	303	.	.	.	0	0	0.58	0	0	0	0	0	0	0	1.74	0	0	0	0	0
Am_Tr_191195	392	.	.	.	0	0.206667	0.823333	0.903333	0	0	0	0	0.62	0	0.45	1.54	0.48	0.54	1.1	1.07
Am_Tr_191196	1414	QHN92328.1_ATP-dependent zinc metalloprotease FTSH 9 [Arachis hypogaea]	AT3G47060.1_FTSH protease 7, GeneName=ftsh7	.	0.166667	0.346667	0.19	0.16	0.16	0.08	0.26	0.39	0.44	0.21	0.07	0.23	0.27	0.24	0.08	0.16
Am_Tr_191197	337	.	.	.	0	0	1.12	0	0	0	0	0	0	0	1.93	0.74	0.69	0	0	0
Am_Tr_191198	320	.	.	.	0.313333	0.256667	0.55	0	0	0.94	0	0	0	0.77	0	0.85	0.8	0	0	0
Am_Tr_191199	295	.	.	.	0	0	1.37	0	0	0	0	0	0	0	0	0	4.11	0	0	0
Am_Tr_191200	1014	KAH1237317.1_Callose synthase 5 [Glycine max]	AT2G13680.1_callose synthase 5, GeneName=CALS5	IPR026899_1,3-beta-glucan synthase subunit FKS1-like, domain-1	0	0.12	0.31	0.04	0	0	0	0	0.26	0.1	0.28	0.45	0.2	0.12	0	0
Am_Tr_191201	1402	KAH1237317.1_Callose synthase 5 [Glycine max]	AT2G13680.1_callose synthase 5, GeneName=CALS5	IPR026899_1,3-beta-glucan synthase subunit FKS1-like, domain-1; IPR039431_Vta1/callose synthase, N-terminal	0	0	0.396667	0	0	0	0	0	0	0	0.96	0.23	0	0	0	0
Am_Tr_191202	511	XP_026280070.1_Down syndrome cell adhesion molecule-like protein Dscam2 [Frankliniella occidentalis]	.	IPR003961_Fibronectin type III; IPR036116_Fibronectin type III superfamily	0	0	0.65	0	0	0	0	0	0	0	0.67	0	1.28	0	0	0
Am_Tr_191203	378	XP_034230021.1_Down syndrome cell adhesion molecule-like protein Dscam2 isoform X38 [Thrips palmi]	.	IPR036116_Fibronectin type III superfamily; IPR003961_Fibronectin type III	0	0	0.496667	0	0	0	0	0	0	0	0.74	0	0.75	0	0	0
Am_Tr_191204	351	XP_026280070.1_Down syndrome cell adhesion molecule-like protein Dscam2 [Frankliniella occidentalis]	.	IPR036116_Fibronectin type III superfamily; IPR003961_Fibronectin type III	0	0	0.386667	0	0	0	0	0	0	0	1.16	0	0	0	0	0
Am_Tr_191205	428	.	.	.	0	0.423333	0.0933333	0.0966667	0	0	0	0	0.88	0.39	0	0	0.28	0	0	0.29
Am_Tr_191206	1244	.	.	.	0	0.163333	0.0933333	0.2	0	0	0	0.36	0.13	0	0	0.18	0.1	0.09	0.29	0.22
Am_Tr_191207	921	.	.	.	0.273333	0.19	0.0433333	0	0.41	0.41	0	0	0.45	0.12	0	0.13	0	0	0	0
Am_Tr_191208	295	.	.	.	0	0	0.343333	0	0	0	0	0	0	0	0	0	1.03	0	0	0
Am_Tr_191209	329	XP_026290495.1_40S ribosomal protein S21 [Frankliniella occidentalis] KAE8747968.1 hypothetical protein FOCC_FOCC005358 [Frankliniella occidentalis]	AT3G53890.2_Ribosomal protein S21e	.	0	0	2.46	0	0	0	0	0	0	0	0	0	7.38	0	0	0
Am_Tr_191210	585	PNX66461.1_hypothetical protein L195_g055105, partial [Trifolium pratense]	.	.	0	0.33	0	0	0	0	0	0.25	0.29	0.45	0	0	0	0	0	0
Am_Tr_191211	537	PNX66461.1_hypothetical protein L195_g055105, partial [Trifolium pratense]	.	.	0.37	0.11	0	0	0.61	0	0.5	0	0.33	0	0	0	0	0	0	0
Am_Tr_191212	660	MCH86443.1_copia protein [Trifolium medium]	.	.	0.353333	0	0.06	0	0.44	0.44	0.18	0	0	0	0.18	0	0	0	0	0
Am_Tr_191213	312	PNX66461.1_hypothetical protein L195_g055105, partial [Trifolium pratense]	.	.	0	0.373333	1.08333	0	0	0	0	0	1.12	0	2.39	0	0.86	0	0	0
Am_Tr_191214	641	XP_026284729.1_glucose dehydrogenase [FAD, quinone]-like [Frankliniella occidentalis]	.	IPR007867_Glucose-methanol-choline oxidoreductase, C-terminal	0	0	0.716667	0	0	0	0	0	0	0	1.32	0.64	0.19	0	0	0
Am_Tr_191215	234	MCI01683.1_RNA-directed DNA polymerase (Reverse transcriptase) [Trifolium medium]	.	.	0	1.16	0	0	0	0	0	0	3.48	0	0	0	0	0	0	0
Am_Tr_191216	516	XP_024636186.1_uncharacterized protein LOC112420759 [Medicago truncatula]	.	.	0.433333	0.12	0.2	0.543333	0.65	0.65	0	0	0.36	0	0	0.6	0	0	1.63	0
Am_Tr_191217	704	XP_024636186.1_uncharacterized protein LOC112420759 [Medicago truncatula]	.	IPR036691_Endonuclease/exonuclease/phosphatase superfamily	0.0533333	0.143333	0.0566667	0.0666667	0	0	0.16	0	0.43	0	0	0	0.17	0.2	0	0
Am_Tr_191218	233	MCI01683.1_RNA-directed DNA polymerase (Reverse transcriptase) [Trifolium medium]	.	.	0	0	0	0	0	0	0	0	0	0	0	0	0	0	0	0
Am_Tr_191219	664	.	.	.	0	0	0.653333	0	0	0	0	0	0	0	1.96	0	0	0	0	0
Am_Tr_191220	359	.	.	.	0	0	0	2.2	0	0	0	0	0	0	0	0	0	4.58	2.02	0
Am_Tr_191221	470	XP_003052159.1_uncharacterized protein NECHADRAFT_68385 [Fusarium vanettenii 77-13-4] EEU46446.1 hypothetical protein NECHADRAFT_68385 [Fusarium vanettenii 77-13-4]	.	.	0.53	0	0	0	0	0	1.59	0	0	0	0	0	0	0	0	0
Am_Tr_191222	213	.	.	.	0	0	0	0	0	0	0	0	0	0	0	0	0	0	0	0
Am_Tr_191223	228	.	.	.	0	3.33667	0	0	0	0	0	3.22	0	6.79	0	0	0	0	0	0
Am_Tr_191224	368	.	.	.	0	0.586667	0.183333	0.616667	0	0	0	1.22	0	0.54	0	0	0.55	1.85	0	0
Am_Tr_191225	325	.	.	.	0.256667	0.99	0	0.846667	0	0	0.77	0	2.97	0	0	0	0	0	0.87	1.67
Am_Tr_191226	333	.	.	.	0.556667	0.496667	0.236667	1.31667	0.83	0.84	0	0.79	0	0.7	0	0	0.71	0	0.81	3.14
Am_Tr_191227	212	.	.	.	0	0	1.56333	0	0	0	0	0	0	0	0	0	4.69	0	0	0
Am_Tr_191228	238	.	.	.	0	0	0	0	0	0	0	0	0	0	0	0	0	0	0	0
Am_Tr_191229	206	.	.	.	0	0	0	0	0	0	0	0	0	0	0	0	0	0	0	0
Am_Tr_191230	374	RIB23699.1_ribosomal protein S28e, partial [Gigaspora rosea] CAG8763396.1 18739_t:CDS:1, partial [Dentiscutata erythropus] CAG8785540.1 42281_t:CDS:1, partial [Gigaspora margarita]	AT3G10090.1_Nucleic acid-binding, OB-fold-like protein	.	0.21	0	0	0	0	0.63	0	0	0	0	0	0	0	0	0	0
Am_Tr_191231	299	KDE09119.1_40S ribosomal protein S28 [Microbotryum lychnidis-dioicae p1A1 Lamole]	AT3G10090.1_Nucleic acid-binding, OB-fold-like protein	.	0	0	0	0	0	0	0	0	0	0	0	0	0	0	0	0
Am_Tr_191232	607	.	.	.	0	0.233333	0	0.08	0	0	0	0	0.27	0.43	0	0	0	0.24	0	0
Am_Tr_191233	406	XP_014241375.1_uncharacterized protein LOC106662081 [Cimex lectularius]	.	IPR012464_Protein of unknown function DUF1676	0	0	0.16	0	0	0	0	0	0	0	0	0.48	0	0	0	0
Am_Tr_191234	274	.	.	.	0	0	0	0	0	0	0	0	0	0	0	0	0	0	0	0
Am_Tr_191235	313	XP_026290201.1_ras-related protein Rab-11A isoform X2 [Frankliniella occidentalis] KAE8745004.1 Rab11 [Frankliniella occidentalis]	AT4G18430.1_RAB GTPase homolog A1E, GeneName=RABA1e	IPR001806_Small GTPase; IPR027417_P-loop containing nucleoside triphosphate hydrolase; IPR005225_Small GTP-binding protein domain	0	0	1.70667	0	0	0	0	0	0	0	0	0	5.12	0	0	0
Am_Tr_191236	5347	XP_016164673.1_uncharacterized protein LOC107607211 [Arachis ipaensis]	AT3G24255.5_RNA-directed DNA polymerase (reverse transcriptase)-related family protein	IPR025558_Domain of unknown function DUF4283	0	3.13667	0.876667	1.21333	0	0	0	3.26	4.95	1.2	0.95	1.33	0.35	1.17	2.16	0.31
Am_Tr_191237	1673	PNX75059.1_ribonuclease H [Trifolium pratense]	AT5G42905.1_Polynucleotidyl transferase, ribonuclease H-like superfamily protein	.	0.0433333	1.06667	0.403333	1.12	0.13	0	0	2.17	0.56	0.47	0.99	0.06	0.16	3	0	0.36
Am_Tr_191238	4649	RYR47659.1_hypothetical protein Ahy_A07g033602 [Arachis hypogaea]	AT3G24255.5_RNA-directed DNA polymerase (reverse transcriptase)-related family protein	IPR025558_Domain of unknown function DUF4283	0.05	0.23	0.213333	0.0966667	0.02	0.11	0.02	0	0.36	0.33	0	0.56	0.08	0.23	0	0.06
Am_Tr_191239	538	PNX89922.1_kunitz type trypsin inhibitor [Trifolium pratense]	.	.	0	0.306667	0	0	0	0	0	0	0.66	0.26	0	0	0	0	0	0
Am_Tr_191240	568	KZV18031.1_clathrin heavy chain 1 [Dorcoceras hygrometricum]	AT3G08530.1_Clathrin, heavy chain	.	0	0	0	0	0	0	0	0	0	0	0	0	0	0	0	0
Am_Tr_191241	583	KEH33364.1_viral movement protein [Medicago truncatula]	.	.	0	0	0	0.0866667	0	0	0	0	0	0	0	0	0	0	0	0.26
Am_Tr_191242	949	MCI38130.1_ribonuclease H protein [Trifolium medium]	.	.	0	1.51333	0.113333	0.173333	0	0	0	3.17	0.61	0.76	0	0.12	0.22	0.39	0	0.13
Am_Tr_191243	939	PNX81608.1_ribonuclease H [Trifolium pratense]	AT5G42905.1_Polynucleotidyl transferase, ribonuclease H-like superfamily protein	IPR012337_Ribonuclease H-like superfamily; IPR002156_Ribonuclease H domain	0.0366667	0.13	0.46	0	0	0	0.11	0.39	0	0	1	0.38	0	0	0	0
Am_Tr_191244	458	MCI28066.1_putative ribonuclease H protein [Trifolium medium]	.	.	0.223333	0.93	0	0	0	0	0.67	0.77	1.33	0.69	0	0	0	0	0	0
Am_Tr_191245	4701	GAU26239.1_hypothetical protein TSUD_224300 [Trifolium subterraneum]	AT1G43760.1_DNAse I-like superfamily protein	IPR025558_Domain of unknown function DUF4283	0.113333	1.12333	0.33	0.64	0.19	0	0.15	1.57	0	1.8	0.22	0	0.77	0.97	0	0.95
Am_Tr_191246	238	KYP48433.1_Retrovirus-related Pol polyprotein from transposon TNT 1-94, partial [Cajanus cajan]	.	.	0	2.59333	0	0	0	0	0	7.78	0	0	0	0	0	0	0	0
Am_Tr_191247	255	KYP48433.1_Retrovirus-related Pol polyprotein from transposon TNT 1-94, partial [Cajanus cajan]	.	.	0	0.636667	0	0	0	0	0	1.91	0	0	0	0	0	0	0	0
Am_Tr_191248	227	MCH91428.1_transportin-3-like [Trifolium medium]	.	.	0	0	0	0	0	0	0	0	0	0	0	0	0	0	0	0
Am_Tr_191249	212	XP_020217579.1_uncharacterized protein LOC109801023 [Cajanus cajan]	.	.	0	0	0	0	0	0	0	0	0	0	0	0	0	0	0	0
Am_Tr_191250	267	.	.	.	0	0	0.49	0	0	0	0	0	0	0	0	0	1.47	0	0	0
Am_Tr_191251	684	.	.	.	0.7	0.166667	0	0	1.55	0.55	0	0.22	0.28	0	0	0	0	0	0	0
Am_Tr_191252	1387	.	.	.	0.08	0	0.0466667	0.09	0.17	0	0.07	0	0	0	0.14	0	0	0.27	0	0
Am_Tr_191253	1604	.	.	.	0	0.19	0.0766667	0.186667	0	0	0	0.33	0	0.24	0	0	0.23	0	0	0.56
Am_Tr_191254	326	.	.	.	0	4.51	0.503333	0.473333	0	0	0	6.66	3.93	2.94	0	0	1.51	0.56	0.86	0
Am_Tr_191255	496	.	.	.	0.33	0	0.1	0	0	0.7	0.29	0	0	0	0	0	0.3	0	0	0
Am_Tr_191256	438	.	.	.	0	0	0.406667	0	0	0	0	0	0	0	0	1.22	0	0	0	0
Am_Tr_191257	453	.	.	.	0.14	0	0.223333	0.266667	0	0.42	0	0	0	0	0.67	0	0	0.4	0	0.4
Am_Tr_191258	466	.	.	.	0	0.11	0	0	0	0	0	0	0	0.33	0	0	0	0	0	0
Am_Tr_191259	250	.	.	.	0.73	0	0	0	2.19	0	0	0	0	0	0	0	0	0	0	0
Am_Tr_191260	946	.	.	.	0.22	0.806667	0.77	0	0.53	0.13	0	0	1.73	0.69	0.66	0.87	0.78	0	0	0
Am_Tr_191261	301	.	.	.	0	0	0.643333	0	0	0	0	0	0	0	0	0	1.93	0	0	0
Am_Tr_191262	325	RVW22927.1_Diaminopimelate decarboxylase 1, chloroplastic [Vitis vinifera]	AT3G14390.1_Pyridoxal-dependent decarboxylase family protein	.	0	0	0	0	0	0	0	0	0	0	0	0	0	0	0	0
Am_Tr_191263	242	RVW22927.1_Diaminopimelate decarboxylase 1, chloroplastic [Vitis vinifera]	AT3G14390.1_Pyridoxal-dependent decarboxylase family protein	.	0	0	0	0	0	0	0	0	0	0	0	0	0	0	0	0
Am_Tr_191264	317	GEY80892.1_pyridoxal-dependent decarboxylase family protein [Tanacetum cinerariifolium]	AT3G14390.1_Pyridoxal-dependent decarboxylase family protein	.	0	0	0	0	0	0	0	0	0	0	0	0	0	0	0	0
Am_Tr_191265	306	.	.	.	0.306667	0.2	0.28	0	0	0	0.92	0.6	0	0	0.84	0	0	0	0	0
Am_Tr_191266	528	.	.	.	0.21	0.14	0	0.103333	0.63	0	0	0.42	0	0	0	0	0	0.31	0	0
Am_Tr_191267	234	RVW22927.1_Diaminopimelate decarboxylase 1, chloroplastic [Vitis vinifera]	AT3G14390.1_Pyridoxal-dependent decarboxylase family protein	.	0	0	0	0	0	0	0	0	0	0	0	0	0	0	0	0
Am_Tr_191268	322	.	.	.	0	0	0	0	0	0	0	0	0	0	0	0	0	0	0	0
Am_Tr_191269	475	.	.	.	0	0.136667	0	0	0	0	0	0	0.41	0	0	0	0	0	0	0
Am_Tr_191270	518	.	.	.	0.413333	0.39	0.1	0.526667	0	0.97	0.27	0.62	0	0.55	0	0.3	0	0.95	0	0.63
Am_Tr_191271	587	.	.	.	0.246667	0.763333	0.943333	1.04667	0	0.53	0.21	0.75	0.86	0.68	1.94	0	0.89	0.26	2.11	0.77
Am_Tr_191272	615	.	.	.	0.163333	0	0.346667	0.08	0	0.49	0	0	0	0	0.6	0.23	0.21	0.24	0	0
Am_Tr_191273	223	.	.	.	0	0	1.16667	0	0	0	0	0	0	0	0	3.5	0	0	0	0
Am_Tr_191274	531	XP_004515810.1_zinc finger protein SHOOT GRAVITROPISM 5 [Cicer arietinum]	.	.	1.96667	0.456667	0.23	0.83	0	3.59	2.31	0.31	0.86	0.2	0	0.69	0	1.56	0.93	0
Am_Tr_191275	567	.	.	.	0	0	0.08	0	0	0	0	0	0	0	0	0	0.24	0	0	0
Am_Tr_191276	1046	.	.	.	0	0	0	0	0	0	0	0	0	0	0	0	0	0	0	0
Am_Tr_191277	504	.	.	.	0	0	0	0.223333	0	0	0	0	0	0	0	0	0	0.33	0.34	0
Am_Tr_191278	593	KXH46590.1_oxidoreductase [Colletotrichum nymphaeae SA-01]	.	IPR004104_Gfo/Idh/MocA-like oxidoreductase, C-terminal	0	0	0.643333	0	0	0	0	0	0	0	1.69	0.24	0	0	0	0
Am_Tr_191279	336	.	.	.	0	0	0	0.256667	0	0	0	0	0	0	0	0	0	0	0	0.77
Am_Tr_191280	459	KXH46590.1_oxidoreductase [Colletotrichum nymphaeae SA-01]	.	IPR000683_Gfo/Idh/MocA-like oxidoreductase, N-terminal; IPR036291_NAD(P)-binding domain superfamily	0	0	0.44	0	0	0	0	0	0	0	0.98	0	0.34	0	0	0
Am_Tr_191281	243	.	.	.	0	0	0	0	0	0	0	0	0	0	0	0	0	0	0	0
Am_Tr_191282	274	.	.	.	0	0	0.403333	0	0	0	0	0	0	0	1.21	0	0	0	0	0
Am_Tr_191283	666	.	.	.	0	0	0.06	0.216667	0	0	0	0	0	0	0	0	0.18	0	0.22	0.43
Am_Tr_191284	1764	KAE8749856.1_UDP-glycosyltransferase-13 [Frankliniella occidentalis]	AT1G05675.1_UDP-Glycosyltransferase superfamily protein	IPR002213_UDP-glucuronosyl/UDP-glucosyltransferase	0	0	1.02667	0	0	0	0	0	0	0	2.67	0.41	0	0	0	0
Am_Tr_191285	532	KAE8749856.1_UDP-glycosyltransferase-13 [Frankliniella occidentalis]	.	.	0	0	0.61	0	0	0	0	0	0	0	1.83	0	0	0	0	0
Am_Tr_191286	450	XP_026290324.1_UDP-glucuronosyltransferase 2B2-like [Frankliniella occidentalis]	.	.	0	0	0.453333	0	0	0	0	0	0	0	1.36	0	0	0	0	0
Am_Tr_191287	293	XP_026290324.1_UDP-glucuronosyltransferase 2B2-like [Frankliniella occidentalis]	.	.	0	0	1.28333	0	0	0	0	0	0	0	3.85	0	0	0	0	0
Am_Tr_191288	1416	XP_027191534.1_F-box/LRR-repeat protein At4g14103-like isoform X2 [Cicer arietinum]	AT1G58310.1_F-box/RNI-like superfamily protein	IPR001810_F-box domain; IPR036047_F-box-like domain superfamily	0.2	0.0866667	0.226667	0.456667	0.26	0	0.34	0.26	0	0	0	0.68	0	0	0.28	1.09
Am_Tr_191289	1297	XP_027191534.1_F-box/LRR-repeat protein At4g14103-like isoform X2 [Cicer arietinum]	AT1G58310.1_F-box/RNI-like superfamily protein	IPR001810_F-box domain; IPR036047_F-box-like domain superfamily	0.753333	1.27333	0.913333	0.75	0.78	1.11	0.37	0.87	1.32	1.63	0.7	1.32	0.72	0.19	0.86	1.2
Am_Tr_191290	1068	XP_027191534.1_F-box/LRR-repeat protein At4g14103-like isoform X2 [Cicer arietinum]	AT1G58310.1_F-box/RNI-like superfamily protein	IPR001810_F-box domain; IPR036047_F-box-like domain superfamily	0.553333	0.14	0.583333	0.64	0	0.97	0.69	0	0.42	0	0.05	0.98	0.72	1.34	0.58	0
Am_Tr_191291	341	.	.	.	0	0	0	0.743333	0	0	0	0	0	0	0	0	0	1.49	0	0.74
Am_Tr_191292	712	.	.	.	0	0.433333	0.166667	0	0	0	0	0.11	0.85	0.34	0	0	0.5	0	0	0
Am_Tr_191293	335	.	.	.	0	0	0	0.516667	0	0	0	0	0	0	0	0	0	0	0	1.55
Am_Tr_191294	1161	XP_004486760.1_ALA-interacting subunit 1-like [Cicer arietinum]	AT1G54320.1_LEM3 (ligand-effect modulator 3) family protein / CDC50 family protein	IPR005045_CDC50/LEM3 family	0	0.0366667	1.29333	0	0	0	0	0	0.11	0	2.79	0.57	0.52	0	0	0
Am_Tr_191295	506	.	.	.	0	0	0.19	0	0	0	0	0	0	0	0	0	0.57	0	0	0
Am_Tr_191296	1221	GAU29467.1_hypothetical protein TSUD_65020 [Trifolium subterraneum]	.	.	0.22	0.276667	0.0833333	0.223333	0	0.58	0.08	0.37	0.21	0.25	0.16	0.09	0	0.29	0.19	0.19
Am_Tr_191297	299	.	.	.	1.13	0	0	0	3.39	0	0	0	0	0	0	0	0	0	0	0
Am_Tr_191298	279	.	.	.	0	0	0	0	0	0	0	0	0	0	0	0	0	0	0	0
Am_Tr_191299	277	.	.	.	0	0	0.893333	0	0	0	0	0	0	0	0	2.68	0	0	0	0
Am_Tr_191300	349	.	.	.	0	0	0	0	0	0	0	0	0	0	0	0	0	0	0	0
Am_Tr_191301	450	.	.	.	0	0.253333	0	0.136667	0	0	0	0.4	0	0.36	0	0	0	0.41	0	0
Am_Tr_191302	394	.	.	.	0	0.936667	0.61	0.356667	0	0	0	0.52	1.82	0.47	0.89	0	0.94	0	0.54	0.53
Am_Tr_191303	412	.	.	.	0	0	0	0	0	0	0	0	0	0	0	0	0	0	0	0
Am_Tr_191304	281	.	.	.	0.416667	0	0.37	0.896667	0	0	1.25	0	0	0	1.11	0	0	0	2.69	0
Am_Tr_191305	209	.	.	.	0	0	0	0	0	0	0	0	0	0	0	0	0	0	0	0
Am_Tr_191306	309	.	.	.	0.696667	0	0	0	0	2.09	0	0	0	0	0	0	0	0	0	0
Am_Tr_191307	503	.	.	.	0.566667	0.346667	0.19	0.22	1.02	0.68	0	0	0.75	0.29	0.28	0	0.29	0.33	0	0.33
Am_Tr_191308	238	.	.	.	0	1.06333	0	0	0	0	0	0	3.19	0	0	0	0	0	0	0
Am_Tr_191309	242	.	.	.	0	0	0	0	0	0	0	0	0	0	0	0	0	0	0	0
Am_Tr_191310	2442	KAE8739531.1_hypothetical protein FOCC_FOCC014951 [Frankliniella occidentalis]	AT5G26240.2_chloride channel D, GeneName=CLC-D	IPR001807_Chloride channel, voltage gated; IPR000644_CBS domain; IPR014743_Chloride channel, core	0	0.0133333	0.64	0	0	0	0	0	0	0.04	1.65	0.2	0.07	0	0	0
Am_Tr_191311	246	XP_046136617.1_CP2 transcription factor-domain-containing protein [Fusarium solani] KAH7272000.1 CP2 transcription factor-domain-containing protein [Fusarium solani]	.	.	1.46667	0	0	0	0	0	4.4	0	0	0	0	0	0	0	0	0
Am_Tr_191312	781	.	.	.	0.26	0	0	0	0	0.78	0	0	0	0	0	0	0	0	0	0
Am_Tr_191313	947	.	.	.	0.5	1.41	1.28333	1.44	0	0	1.5	0	2.17	2.06	0	2.17	1.68	0	0.9	3.42
Am_Tr_191314	559	.	.	.	0.19	0.31	1.32333	0.373333	0.28	0.29	0	0	0.93	0	0	1.32	2.65	0.56	0.28	0.28
Am_Tr_191315	912	.	.	.	0.576667	0.356667	0	0.31	0	1.73	0	0	1.07	0	0	0	0	0	0.93	0
Am_Tr_191316	746	.	.	.	0.673333	1.44	0.633333	1.25333	2.02	0	0	3.34	0.98	0	0.45	1.45	0	2.53	1.23	0
Am_Tr_191317	588	.	.	.	0	0.55	0.356667	0	0	0	0	0.75	0	0.9	1.07	0	0	0	0	0
Am_Tr_191318	391	.	.	.	0.186667	0	0.32	0.37	0.56	0	0	0	0	0	0	0	0.96	0	1.11	0
Am_Tr_191319	251	.	.	.	0.666667	0	0	0	0	0	2	0	0	0	0	0	0	0	0	0
Am_Tr_191320	672	.	.	.	0	0.41	0.246667	0.63	0	0	0	0.82	0.23	0.18	0	0.2	0.54	0.42	0.21	1.26
Am_Tr_191321	377	.	.	.	0	0.833333	0.826667	0.386667	0	0	0	1.15	1.35	0	1.96	0	0.52	0.58	0	0.58
Am_Tr_191322	484	.	.	.	0.123333	0.103333	0.623333	0.483333	0	0.37	0	0	0	0.31	1.19	0.68	0	0.36	1.09	0
Am_Tr_191323	456	.	.	.	0.136667	0.36	0	0.396667	0.41	0	0	0.39	0	0.69	0	0	0	0.79	0	0.4
Am_Tr_191324	544	.	.	.	1.49667	0	0	0	0.59	0	3.9	0	0	0	0	0	0	0	0	0
Am_Tr_191325	206	.	.	.	0	0	1.90333	0	0	0	0	0	0	0	0	5.71	0	0	0	0
Am_Tr_191326	336	.	.	.	0	0	0	0.256667	0	0	0	0	0	0	0	0	0	0	0	0.77
Am_Tr_191327	246	.	.	.	0	0	0	0	0	0	0	0	0	0	0	0	0	0	0	0
Am_Tr_191328	327	GAC74002.1_60S ribosomal protein L35 [Moesziomyces antarcticus T-34]	AT2G39390.1_Ribosomal L29 family protein	.	0	0	0.716667	0	0	0	0	0	0	0	1.4	0	0.75	0	0	0
Am_Tr_191329	262	SAM58865.1_probable ribosomal protein L35 [Ustilago bromivora] SOV01281.1 probable ribosomal protein L35 [Ustilago sp. UG-2017a]	AT2G39390.1_Ribosomal L29 family protein	.	0	0	0	0	0	0	0	0	0	0	0	0	0	0	0	0
Am_Tr_191330	510	RDX60594.1_Subtilisin-like protease SBT5.4, partial [Mucuna pruriens]	AT2G04160.1_Subtilisin-like serine endopeptidase family protein, GeneName=AIR3	.	0.183333	0.53	0	0.323333	0	0	0.55	0.95	0.36	0.28	0	0	0	0.65	0	0.32
Am_Tr_191331	859	.	.	.	0	0	0	0.556667	0	0	0	0	0	0	0	0	0	0	1.67	0
Am_Tr_191332	343	XP_033464533.1_heat shock protein 70 [Dissoconium aciculare CBS 342.82] KAF1827497.1 heat shock protein 70 [Dissoconium aciculare CBS 342.82]	AT5G42020.2_Heat shock protein 70 (Hsp 70) family protein, GeneName=BIP2	IPR013126_Heat shock protein 70 family; IPR043129_ATPase, nucleotide binding domain	0	1.55	0	0	0	0	0	1.45	2.56	0.64	0	0	0	0	0	0
Am_Tr_191333	315	KAG9811414.1_heat shock 70 kDa protein, partial [Aureobasidium melanogenum]	AT1G09080.2_Heat shock protein 70 (Hsp 70) family protein, GeneName=BIP3	IPR013126_Heat shock protein 70 family; IPR043129_ATPase, nucleotide binding domain	0	0.88	0	0	0	0	0	1.83	0	0.81	0	0	0	0	0	0
Am_Tr_191334	336	XP_036585998.1_heat shock 70 kda protein [Colletotrichum truncatum] KAF6796189.1 heat shock 70 kda protein [Colletotrichum truncatum]	AT5G42020.2_Heat shock protein 70 (Hsp 70) family protein, GeneName=BIP2	IPR013126_Heat shock protein 70 family; IPR043129_ATPase, nucleotide binding domain	0	0	1.73	0.256667	0	0	0	0	0	0	0	5.19	0	0	0	0.77
Am_Tr_191335	374	XP_016640780.1_hypothetical protein SAPIO_CDS7001 [Scedosporium apiospermum] KEZ40981.1 hypothetical protein SAPIO_CDS7001 [Scedosporium apiospermum]	AT1G69410.1_eukaryotic elongation factor 5A-3, GeneName=ELF5A-3	IPR008991_Translation protein SH3-like domain superfamily; IPR001884_Translation elongation factor IF5A-like	1.25667	0	0	0	0	0.63	3.14	0	0	0	0	0	0	0	0	0
Am_Tr_191336	530	.	AT2G20050.2_protein phosphatase 2C and cyclic nucleotide-binding/kinase domain-containing protein	.	0	0.19	0.0966667	0.516667	0	0	0	0.3	0	0.27	0	0.29	0	0	1.55	0
Am_Tr_191337	1168	XP_026272699.1_influenza virus NS1A-binding protein homolog [Frankliniella occidentalis] XP_026272700.1 influenza virus NS1A-binding protein homolog [Frankliniella occidentalis] XP_026272701.1 influenza virus NS1A-binding protein homolog [Frankliniella occidentalis] XP_026272702.1 influenza virus NS1A-binding protein homolog [Frankliniella occidentalis] XP_026272704.1 influenza virus NS1A-binding…	.	IPR006652_Kelch repeat type 1; IPR015915_Kelch-type beta propeller	0	0.0366667	1.13667	0	0	0	0	0	0.11	0	2.69	0.38	0.34	0	0	0
Am_Tr_191338	1021	.	.	.	0	0.12	0.93	0	0	0	0	0	0.26	0.1	2.18	0	0.61	0	0	0
Am_Tr_191339	891	KAG5050915.1_hypothetical protein JHK87_003113 [Glycine soja]	AT2G18290.1_anaphase promoting complex 10, GeneName=APC10	.	0	0.1	0.0433333	0.19	0	0	0	0.14	0.16	0	0	0.13	0	0.43	0	0.14
Am_Tr_191340	817	.	AT2G18290.1_anaphase promoting complex 10, GeneName=APC10	.	0	0.21	0.233333	0.213333	0	0	0	0.31	0.18	0.14	0.13	0.3	0.27	0	0	0.64
Am_Tr_191341	466	RYR04749.1_hypothetical protein Ahy_B06g084525 isoform C [Arachis hypogaea]	AT5G41130.1_Esterase/lipase/thioesterase family protein	.	1.26667	0.286667	0	0.126667	0	0.39	3.41	0	0.86	0	0	0	0	0.38	0	0
Am_Tr_191342	671	KAG4951178.1_hypothetical protein JHK85_045045 [Glycine max]	AT5G41130.1_Esterase/lipase/thioesterase family protein	.	0.386667	0.326667	0	0	0.21	0	0.95	0.61	0	0.37	0	0	0	0	0	0
Am_Tr_191343	323	.	.	.	0.26	0.336667	0	0.863333	0	0	0.78	0	1.01	0	0	0	0	0.86	0.88	0.85
Am_Tr_191344	258	.	.	.	0.66	4.45667	1.07	0.593333	0	1.98	0	5.45	0	7.92	1.52	0	1.69	1.78	0	0
Am_Tr_191345	306	.	.	.	0	0	0	0	0	0	0	0	0	0	0	0	0	0	0	0
Am_Tr_191346	308	.	.	.	0	0	0	0.646667	0	0	0	0	0	0	0	0	0	0	0	1.94
Am_Tr_191347	373	.	.	.	0	0	0.703333	0.2	0	0	0	0	0	0	1.01	0.57	0.53	0.6	0	0
Am_Tr_191348	364	.	.	.	0.373333	0	0.176667	0	0	0	1.12	0	0	0	0.53	0	0	0	0	0
Am_Tr_191349	452	KAH8910481.1_hypothetical protein BR93DRAFT_271509 [Coniochaeta sp. PMI_546]	.	.	0.62	0	0	0	0	0.83	1.03	0	0	0	0	0	0	0	0	0
Am_Tr_191350	336	KAE8902106.1_hypothetical protein PF003_g14005 [Phytophthora fragariae] KAE8931710.1 hypothetical protein PF009_g18238 [Phytophthora fragariae] KAE8996621.1 hypothetical protein PF011_g15823 [Phytophthora fragariae] KAE9096495.1 hypothetical protein PF007_g16976 [Phytophthora fragariae] KAE9096820.1 hypothetical protein PF010_g16197 [Phytophthora fragariae]	.	.	0.503333	0	0	0	0	0.82	0.69	0	0	0	0	0	0	0	0	0
Am_Tr_191351	1021	TKY68751.1_Linoleate 9S-lipoxygenase 5 [Spatholobus suberectus]	AT3G22400.1_PLAT/LH2 domain-containing lipoxygenase family protein, GeneName=LOX5	.	0.0966667	0	0.0466667	0	0	0	0.29	0	0	0	0	0.14	0	0	0	0
Am_Tr_191352	862	TKY68751.1_Linoleate 9S-lipoxygenase 5 [Spatholobus suberectus]	AT3G22400.1_PLAT/LH2 domain-containing lipoxygenase family protein, GeneName=LOX5	.	0	0.126667	0.23	0	0	0	0	0.22	0.16	0	0.31	0	0.38	0	0	0
Am_Tr_191353	311	MCI16274.1_copia protein [Trifolium medium]	.	.	0	1.23333	0	0	0	0	0	2.86	0	0.84	0	0	0	0	0	0
Am_Tr_191354	269	XP_004333668.1_ran, putative [Acanthamoeba castellanii str. Neff] ELR11655.1 ran, putative [Acanthamoeba castellanii str. Neff]	AT5G20020.1_RAS-related GTP-binding nuclear protein 2, GeneName=RAN2	.	0	0	0	0	0	0	0	0	0	0	0	0	0	0	0	0
Am_Tr_191355	214	KAA8910746.1_GTP-binding nuclear protein GSP1/Ran [Sphaerosporella brunnea]	AT5G20020.1_RAS-related GTP-binding nuclear protein 2, GeneName=RAN2	.	0	0	0	0	0	0	0	0	0	0	0	0	0	0	0	0
Am_Tr_191356	257	.	.	.	0.65	0	0	0	1.95	0	0	0	0	0	0	0	0	0	0	0
Am_Tr_191357	399	.	.	.	0	0	0	0.173333	0	0	0	0	0	0	0	0	0	0.52	0	0
Am_Tr_191358	363	.	.	.	0	0	0.356667	0	0	0	0	0	0	0	1.07	0	0	0	0	0
Am_Tr_191359	255	.	.	.	0	1.54333	0	0	0	0	0	0	4.63	0	0	0	0	0	0	0
Am_Tr_191360	335	.	.	.	0	0	0	0.00333333	0	0	0	0	0	0	0	0	0	0	0	0.01
Am_Tr_191361	404	.	.	.	1.83	3.54667	0.3	1.34667	1.56	0	3.93	3.96	4.03	2.65	0.42	0.48	0	1.51	1.03	1.5
Am_Tr_191362	223	.	.	.	0	0	0	1.15	0	0	0	0	0	0	0	0	0	3.45	0	0
Am_Tr_191363	318	.	.	.	0.94	0	0	0	2.82	0	0	0	0	0	0	0	0	0	0	0
Am_Tr_191364	221	.	.	.	0	0	0	0	0	0	0	0	0	0	0	0	0	0	0	0
Am_Tr_191365	383	KAH1253356.1_Protein MAIN-LIKE 2 [Glycine max]	AT2G04865.2_Aminotransferase-like, plant mobile domain family protein	.	0.193333	0	0	0.186667	0.58	0	0	0	0	0	0	0	0	0	0	0.56
Am_Tr_191366	432	.	AT4G35220.1_Cyclase family protein	.	0.933333	0.71	0.396667	0.45	0.45	0.46	1.89	0.86	0.5	0.77	0	0.42	0.77	0	1.35	0
Am_Tr_191367	1197	.	.	.	0.223333	0.61	0.823333	0.826667	0.2	0.39	0.08	0.76	0.64	0.43	0.49	0.65	1.33	0.39	1.4	0.69
Am_Tr_191368	258	.	.	.	0	1.47	2.57	0	0	0	0	0	4.41	0	2.36	3.66	1.69	0	0	0
Am_Tr_191369	326	.	.	.	0	0.766667	0.746667	0.276667	0	0	0	0.83	0	1.47	0.7	1.54	0	0.83	0	0
Am_Tr_191370	398	.	.	.	0	1.21333	0.693333	0.52	0	0	0	1.02	2.16	0.46	0.63	0.99	0.46	0.52	0	1.04
Am_Tr_191371	529	.	.	.	0.416667	0.496667	0	0	1.25	0	0	0	1.49	0	0	0	0	0	0	0
Am_Tr_191372	389	.	.	.	3.21333	3.28333	0.803333	1.66667	6.78	2.86	0	4.84	5.01	0	1.37	1.04	0	1.09	3.91	0
Am_Tr_191373	273	.	.	.	0	0.486667	0.406667	0	0	0	0	1.46	0	0	1.22	0	0	0	0	0
Am_Tr_191374	415	.	.	.	0.273333	0	0	0	0	0	0.82	0	0	0	0	0	0	0	0	0
Am_Tr_191375	1315	XP_045805406.1_probable aspartic proteinase GIP2 [Trifolium pratense]	AT1G03220.1_Eukaryotic aspartyl protease family protein	IPR021109_Aspartic peptidase domain superfamily; IPR032799_Xylanase inhibitor, C-terminal; IPR032861_Xylanase inhibitor, N-terminal	0.13	0.676667	4.58333	2.49667	0	0.39	0	0.06	0.79	1.18	6.91	3.36	3.48	2.62	2.55	2.32
Am_Tr_191376	1232	XP_045805406.1_probable aspartic proteinase GIP2 [Trifolium pratense]	AT1G03220.1_Eukaryotic aspartyl protease family protein	IPR032861_Xylanase inhibitor, N-terminal; IPR032799_Xylanase inhibitor, C-terminal; IPR021109_Aspartic peptidase domain superfamily	0.0266667	0.366667	0.196667	0	0	0	0.08	0.52	0.58	0	0	0.32	0.27	0	0	0
Am_Tr_191377	330	.	.	.	0	0.79	0	0	0	0	0	0	0.95	1.42	0	0	0	0	0	0
Am_Tr_191378	685	XP_026277462.1_uncharacterized protein LOC113205891 [Frankliniella occidentalis] XP_026277463.1 uncharacterized protein LOC113205891 [Frankliniella occidentalis] XP_026277464.1 uncharacterized protein LOC113205891 [Frankliniella occidentalis]	.	.	0	0	0.463333	0	0	0	0	0	0	0	1.02	0.19	0.18	0	0	0
Am_Tr_191379	280	XP_026277462.1_uncharacterized protein LOC113205891 [Frankliniella occidentalis] XP_026277463.1 uncharacterized protein LOC113205891 [Frankliniella occidentalis] XP_026277464.1 uncharacterized protein LOC113205891 [Frankliniella occidentalis]	.	.	0	0	0.746667	0	0	0	0	0	0	0	2.24	0	0	0	0	0
Am_Tr_191380	275	XP_027343314.1_inactive TPR repeat-containing thioredoxin TTL3-like [Abrus precatorius]	AT3G58620.1_tetratricopetide-repeat thioredoxin-like 4, GeneName=TTL4	.	0	0	1.29	0	0	0	0	0	0	0	1.19	1.37	1.31	0	0	0
Am_Tr_191381	227	.	.	.	0	0	3.16	0	0	0	0	0	0	0	0	6.36	3.12	0	0	0
Am_Tr_191382	367	.	.	.	0	0.203333	0	0.413333	0	0	0	0.61	0	0	0	0	0	1.24	0	0
Am_Tr_191383	453	RZC06585.1_Phosphoenolpyruvate carboxykinase (ATP) [Glycine soja]	AT4G37870.1_phosphoenolpyruvate carboxykinase 1, GeneName=PCK1	.	0.113333	0.826667	0	0.136667	0	0	0.34	1.57	0.91	0	0	0	0	0	0.41	0
Am_Tr_191384	373	.	.	.	0.176667	0	0	0	0	0	0.53	0	0	0	0	0	0	0	0	0
Am_Tr_191385	298	KAF5092337.1_hypothetical protein D0Z03_002915, partial [Galactomyces reessii]	AT5G08670.1_ATP synthase alpha/beta family protein	IPR036121_ATPase, F1/V1/A1 complex, alpha/beta subunit, N-terminal domain superfamily; IPR027417_P-loop containing nucleoside triphosphate hydrolase; IPR004100_ATPase, F1/V1/A1 complex, alpha/beta subunit, N-terminal domain	0	1.06667	0	0	0	0	0	0	1.29	1.91	0	0	0	0	0	0
Am_Tr_191386	211	.	.	.	1.80667	1.68333	0	10.97	5.42	0	0	5.05	0	0	0	0	0	9.48	0	23.43
Am_Tr_191387	399	OMJ15099.1_60S ribosomal protein L33-A [Smittium culicis] OMJ16017.1 60S ribosomal protein L33-A [Smittium culicis]	AT1G41880.2_Ribosomal protein L35Ae family protein	IPR001780_Ribosomal protein L35A; IPR009000_Translation protein, beta-barrel domain superfamily	0	0	0	0	0	0	0	0	0	0	0	0	0	0	0	0
Am_Tr_191388	478	.	.	.	0	0.226667	0	0	0	0	0	0.36	0	0.32	0	0	0	0	0	0
Am_Tr_191389	214	.	AT5G55760.1_sirtuin 1, GeneName=SRT1	.	0	0	0	0	0	0	0	0	0	0	0	0	0	0	0	0
Am_Tr_191390	1130	XP_027192644.1_uncharacterized protein LOC113787725 [Cicer arietinum]	.	.	0.44	0.0766667	0	0	0	0.21	1.11	0	0.23	0	0	0	0	0	0	0
Am_Tr_191391	397	.	.	.	0	0	0	0	0	0	0	0	0	0	0	0	0	0	0	0
Am_Tr_191392	456	.	.	.	0	0	0	0	0	0	0	0	0	0	0	0	0	0	0	0
Am_Tr_191393	296	.	.	.	0	1.50333	0	1.12333	0	0	0	2.22	1.32	0.97	0	0	0	1.1	2.27	0
Am_Tr_191394	318	MCI03392.1_hypothetical protein [Trifolium medium]	.	.	0	0	0	0.306667	0	0	0	0	0	0	0	0	0	0	0.92	0
Am_Tr_191395	805	.	.	.	0	0.12	0.68	0	0	0	0	0	0.36	0	2.04	0	0	0	0	0
Am_Tr_191396	588	XP_004339185.1_opioid growth factor receptor (ogfr) region protein, putative [Acanthamoeba castellanii str. Neff] ELR17172.1 opioid growth factor receptor (ogfr) region protein, putative [Acanthamoeba castellanii str. Neff]	.	IPR006757_Opioid growth factor receptor (OGFr) conserved domain	0	0	0	0	0	0	0	0	0	0	0	0	0	0	0	0
Am_Tr_191397	504	XP_004339185.1_opioid growth factor receptor (ogfr) region protein, putative [Acanthamoeba castellanii str. Neff] ELR17172.1 opioid growth factor receptor (ogfr) region protein, putative [Acanthamoeba castellanii str. Neff]	.	IPR006757_Opioid growth factor receptor (OGFr) conserved domain	0	0	0	0	0	0	0	0	0	0	0	0	0	0	0	0
Am_Tr_191398	332	XP_004339185.1_opioid growth factor receptor (ogfr) region protein, putative [Acanthamoeba castellanii str. Neff] ELR17172.1 opioid growth factor receptor (ogfr) region protein, putative [Acanthamoeba castellanii str. Neff]	.	IPR006757_Opioid growth factor receptor (OGFr) conserved domain	0	0	0	0	0	0	0	0	0	0	0	0	0	0	0	0
Am_Tr_191399	771	.	.	.	1.17333	1.67	0.1	0.403333	2.1	0.57	0.85	0.93	1.82	2.26	0	0	0.3	0.34	0.7	0.17
Am_Tr_191400	1299	.	.	.	0.15	0.113333	0.183333	0	0.09	0	0.36	0.09	0.1	0.15	0.22	0.33	0	0	0	0
Am_Tr_191401	927	.	.	.	1.01667	0.436667	0.236667	0.38	1.11	0.95	0.99	0.79	0.28	0.24	0.34	0.14	0.23	0.13	0.41	0.6
Am_Tr_191402	448	.	.	.	0	0	0.49	0.356667	0	0	0	0	0	0	0	0.39	1.08	0	0	1.07
Am_Tr_191403	448	.	.	.	0.116667	0.153333	0	0	0	0	0.35	0	0.46	0	0	0	0	0	0	0
Am_Tr_191404	283	.	.	.	1.33	4.91333	1.58	0.856667	0	2.78	1.21	6.43	1.54	6.77	0	0	4.74	0	1.31	1.26
Am_Tr_191405	488	PNY09504.1_hypothetical protein L195_g006057 [Trifolium pratense]	.	IPR012337_Ribonuclease H-like superfamily	0	0	0	0	0	0	0	0	0	0	0	0	0	0	0	0
Am_Tr_191406	432	PNX76538.1_hypothetical protein L195_g032490, partial [Trifolium pratense]	.	.	0.15	0	1.13	0.44	0.45	0	0	0	0	0	2.58	0.42	0.39	0	0	1.32
Am_Tr_191407	464	MCH88206.1_retrotransposon protein [Trifolium medium]	.	IPR012337_Ribonuclease H-like superfamily	0.963333	1.40333	0.463333	0.906667	0.39	1.19	1.31	1.13	1.73	1.35	0.32	0.73	0.34	0.38	1.57	0.77
Am_Tr_191408	337	KAD4888885.1_hypothetical protein E3N88_20958 [Mikania micrantha]	.	IPR012337_Ribonuclease H-like superfamily	0	0.253333	0.69	0.78	0	0	0	0.76	0	0	0.64	0.74	0.69	0.77	1.57	0
Am_Tr_191409	346	KAD4888885.1_hypothetical protein E3N88_20958 [Mikania micrantha]	.	IPR012337_Ribonuclease H-like superfamily	0.253333	1.75333	1.07333	0.49	0	0.76	0	2.13	2.5	0.63	0	0	3.22	0	1.47	0
Am_Tr_191410	234	WP_203276223.1_DDE-type integrase/transposase/recombinase, partial [Klebsiella pneumoniae] MBM1124174.1 DDE-type integrase/transposase/recombinase [Klebsiella pneumoniae]	.	.	0	2.91333	2.23	0	0	0	0	2.82	3.48	2.44	6.69	0	0	0	0	0
Am_Tr_191411	362	KAD5318103.1_hypothetical protein E3N88_18049 [Mikania micrantha]	.	IPR012337_Ribonuclease H-like superfamily	0.566667	0	0.383333	0	0	0	1.7	0	0	0	0.58	0	0.57	0	0	0
Am_Tr_191412	243	KAD5318103.1_hypothetical protein E3N88_18049 [Mikania micrantha]	.	.	0	0	0	0	0	0	0	0	0	0	0	0	0	0	0	0
Am_Tr_191413	296	MCH80066.1_hypothetical protein [Trifolium medium]	.	.	0.39	0	0	0	1.17	0	0	0	0	0	0	0	0	0	0	0
Am_Tr_191414	250	KAD4981939.1_hypothetical protein E3N88_18610 [Mikania micrantha]	.	.	0	0	0	0	0	0	0	0	0	0	0	0	0	0	0	0
Am_Tr_191415	310	XP_046124581.1_uncharacterized protein B0J15DRAFT_505105 [Fusarium solani] KAH7232622.1 hypothetical protein B0J15DRAFT_505105 [Fusarium solani]	.	.	1.23	0	0	0	0	1.03	2.66	0	0	0	0	0	0	0	0	0
Am_Tr_191416	549	KAG7381088.1_hypothetical protein PHYPSEUDO_006463 [Phytophthora pseudosyringae]	.	.	0.436667	0	0	0	0	0.59	0.72	0	0	0	0	0	0	0	0	0
Am_Tr_191417	642	KYP68832.1_Retrovirus-related Pol polyprotein from transposon opus [Cajanus cajan]	ATMG00850.1_DNA/RNA polymerases superfamily protein, GeneName=ORF107E	.	0.123333	0.233333	0.56	0.603333	0	0	0.37	0	0.5	0.2	0.56	0.93	0.19	0.9	0.69	0.22
Am_Tr_191418	245	MCH91291.1_enzymatic polyprotein [Trifolium medium]	.	.	0	0	0.706667	0	0	0	0	0	0	0	0	0	2.12	0	0	0
Am_Tr_191419	2674	KOM57691.1_hypothetical protein LR48_Vigan11g072400 [Vigna angularis]	ATMG00860.1_DNA/RNA polymerases superfamily protein, GeneName=ORF158	IPR041373_Reverse transcriptase, RNase H-like domain; IPR001584_Integrase, catalytic core; IPR043502_DNA/RNA polymerase superfamily; IPR041588_Integrase zinc-binding domain; IPR012337_Ribonuclease H-like superfamily	0.606667	0.126667	0.253333	0.71	0.24	0.98	0.6	0.11	0.17	0.1	0.07	0.33	0.36	0.74	0.8	0.59
Am_Tr_191420	207	RZB70463.1_Transposon Ty3-G Gag-Pol polyprotein [Glycine soja]	.	.	0	1.90667	0	0	0	0	0	5.72	0	0	0	0	0	0	0	0
Am_Tr_191421	239	.	.	.	0	0.846667	0	1.63667	0	0	0	2.54	0	0	0	0	0	4.91	0	0
Am_Tr_191422	514	KYP35909.1_Retrovirus-related Pol polyprotein from transposon 297 family [Cajanus cajan]	ATMG00860.1_DNA/RNA polymerases superfamily protein, GeneName=ORF158	IPR041577_Reverse transcriptase/retrotransposon-derived protein, RNase H-like domain; IPR043502_DNA/RNA polymerase superfamily	0	0.103333	0	0	0	0	0	0.31	0	0	0	0	0	0	0	0
Am_Tr_191423	287	MCI21157.1_hypothetical protein [Trifolium medium]	ATMG00850.1_DNA/RNA polymerases superfamily protein, GeneName=ORF107E	.	0	0	0	0	0	0	0	0	0	0	0	0	0	0	0	0
Am_Tr_191424	367	.	.	.	0	0	0	0.206667	0	0	0	0	0	0	0	0	0	0	0	0.62
Am_Tr_191425	342	.	.	.	0	0	0	0	0	0	0	0	0	0	0	0	0	0	0	0
Am_Tr_191426	2404	AES62426.1_integral membrane protein [Medicago truncatula]	AT1G28140.1_integral membrane family protein	IPR029472_Retrotransposon Copia-like, N-terminal	0.2	0.38	0.13	0.516667	0	0.32	0.28	0.25	0.27	0.62	0	0.39	0	0.78	0.37	0.4
Am_Tr_191427	2218	AES62426.1_integral membrane protein [Medicago truncatula]	AT1G28140.1_integral membrane family protein	IPR005162_Retrotransposon gag domain	0.266667	0.43	0.42	0.386667	0.8	0	0	0.78	0.36	0.15	0.46	0	0.8	0.04	1.12	0
Am_Tr_191428	1439	TKY75547.1_hypothetical protein E2542_SST04315 [Spatholobus suberectus]	AT1G28140.1_integral membrane family protein	IPR019275_Protein of unknown function DUF2301	10.62	165.647	50.05	51.25	13.77	14.25	3.84	182.15	152.53	162.26	40.11	57.18	52.86	60.27	48.28	45.2
Am_Tr_191429	2062	TKY75547.1_hypothetical protein E2542_SST04315 [Spatholobus suberectus]	AT1G28140.1_integral membrane family protein	IPR019275_Protein of unknown function DUF2301	0.07	0.83	0.363333	0.213333	0	0.21	0	1.53	0.24	0.72	0.51	0	0.58	0	0.33	0.31
Am_Tr_191430	2142	TKY75547.1_hypothetical protein E2542_SST04315 [Spatholobus suberectus]	AT1G28140.1_integral membrane family protein	IPR019275_Protein of unknown function DUF2301	0.386667	1.63333	0.89	0.87	0.58	0	0.58	1.8	1.97	1.13	0.43	1.62	0.62	1.19	1.07	0.35
Am_Tr_191431	1382	KAH1086272.1_hypothetical protein GYH30_017991 [Glycine max]	.	.	0.0366667	0.0733333	0.206667	0.37	0.08	0	0.03	0	0	0.22	0.62	0	0	1.11	0	0
Am_Tr_191432	3646	XP_004508428.1_pentatricopeptide repeat-containing protein At5g64320, mitochondrial [Cicer arietinum] XP_004508429.1 pentatricopeptide repeat-containing protein At5g64320, mitochondrial [Cicer arietinum] XP_004508430.1 pentatricopeptide repeat-containing protein At5g64320, mitochondrial [Cicer arietinum]	AT5G64320.1_Pentatricopeptide repeat (PPR) superfamily protein	IPR002885_Pentatricopeptide repeat	0.03	0.926667	0.57	0.706667	0	0.06	0.03	1.18	0.97	0.63	0.31	0.48	0.92	0.72	0.6	0.8
Am_Tr_191433	2848	XP_020202460.1_pentatricopeptide repeat-containing protein At5g64320, mitochondrial [Cajanus cajan] XP_020202466.1 pentatricopeptide repeat-containing protein At5g64320, mitochondrial [Cajanus cajan] XP_020202473.1 pentatricopeptide repeat-containing protein At5g64320, mitochondrial [Cajanus cajan] XP_020202483.1 pentatricopeptide repeat-containing protein At5g64320, mitochondrial [Cajanus cajan]…	AT5G64320.1_Pentatricopeptide repeat (PPR) superfamily protein	IPR002885_Pentatricopeptide repeat	0.01	0.256667	0.0833333	0.263333	0	0	0.03	0.3	0.2	0.27	0.08	0.17	0	0.25	0.12	0.42
Am_Tr_191434	986	.	.	.	0	0.23	0.14	0.0433333	0	0	0	0.36	0	0.33	0.21	0	0.21	0	0.13	0
Am_Tr_191435	627	.	.	.	0	0	1.04667	0	0	0	0	0	0	0	2.92	0.22	0	0	0	0
Am_Tr_191436	1288	XP_026291102.1_mucin-12-like, partial [Frankliniella occidentalis]	.	.	0	0	0.36	0	0	0	0	0	0	0	0.75	0.25	0.08	0	0	0
Am_Tr_191437	861	PNF43637.1_hypothetical protein B7P43_G00694 [Cryptotermes secundus]	.	.	0	0	0.65	0	0	0	0	0	0	0	1.12	0.7	0.13	0	0	0
Am_Tr_191438	275	KAE8748227.1_hypothetical protein FOCC_FOCC005066 [Frankliniella occidentalis]	.	.	0	0	0.793333	0	0	0	0	0	0	0	2.38	0	0	0	0	0
Am_Tr_191439	305	XP_026293326.1_peptidylglycine alpha-hydroxylating monooxygenase [Frankliniella occidentalis]	.	IPR000323_Copper type II, ascorbate-dependent monooxygenase, N-terminal; IPR008977_PHM/PNGase F domain superfamily	0	0	0.85	0	0	0	0	0	0	0	2.55	0	0	0	0	0
Am_Tr_191440	808	XP_024985322.1_histone H3-like centromeric protein CSE4 [Cynara cardunculus var. scolymus]	AT4G40040.3_Histone superfamily protein	.	0	0	0.783333	0	0	0	0	0	0	0	0	0	2.35	0	0	0
Am_Tr_191441	448	SCM12286.1_60S ribosomal protein L29, putative [Plasmodium chabaudi adami]	AT3G06700.1_Ribosomal L29e protein family	IPR002673_Ribosomal protein L29e	0	0	0	0	0	0	0	0	0	0	0	0	0	0	0	0
Am_Tr_191442	315	XP_034423392.1_60S ribosomal protein L29, putative [Plasmodium berghei ANKA] CXI94008.1 60S ribosomal protein L29, putative [Plasmodium berghei] SCL96937.1 60S ribosomal protein L29, putative [Plasmodium berghei] SCM16515.1 60S ribosomal protein L29, putative [Plasmodium berghei] SCM18309.1 60S ribosomal protein L29, putative [Plasmodium berghei] SCN27739.1 60S ribosomal protein L29, putative [Pl…	AT3G06700.1_Ribosomal L29e protein family	IPR002673_Ribosomal protein L29e	0	0	0	0	0	0	0	0	0	0	0	0	0	0	0	0
Am_Tr_191443	272	.	.	.	2.09333	0	0.456667	0.973333	4.68	1.6	0	0	0	0	0	0	1.37	2.92	0	0
Am_Tr_191444	324	.	.	.	0	0.283333	0	0	0	0	0	0.85	0	0	0	0	0	0	0	0
Am_Tr_191445	315	.	.	.	0	0	0	0.63	0	0	0	0	0	0	0	0	0	0	1.89	0
Am_Tr_191446	294	.	.	.	0.396667	0.376667	0	0.373333	1.19	0	0	1.13	0	0	0	0	0	0	0	1.12
Am_Tr_191447	298	.	.	.	0	0	0	0	0	0	0	0	0	0	0	0	0	0	0	0
Am_Tr_191448	318	.	.	.	0	0	0	0	0	0	0	0	0	0	0	0	0	0	0	0
Am_Tr_191449	585	AFK42929.1_unknown [Medicago truncatula]	AT5G13930.1_Chalcone and stilbene synthase family protein, GeneName=TT4	.	0	0.226667	0.143333	0.433333	0	0	0	0	0	0.68	0.43	0	0	0.78	0	0.52
Am_Tr_191450	211	.	.	.	0	0	0	0	0	0	0	0	0	0	0	0	0	0	0	0
Am_Tr_191451	639	.	.	.	0.62	0.38	0.143333	0	0.69	0.23	0.94	0.44	0.5	0.2	0	0.43	0	0	0	0
Am_Tr_191452	487	.	.	.	0	0	0.18	0	0	0	0	0	0	0	0	0.54	0	0	0	0
Am_Tr_191453	485	.	.	.	0.823333	1.98333	1.52333	1.52333	1.07	1.1	0.3	2.72	1.99	1.24	0	2.17	2.4	0.35	2.8	1.42
Am_Tr_191454	226	.	.	.	1.19667	0	0	0	3.59	0	0	0	0	0	0	0	0	0	0	0
Am_Tr_191455	501	.	.	.	0.343333	1.38667	0.386667	0.556667	0	1.03	0	0.98	1.13	2.05	0	0	1.16	0.67	0	1
Am_Tr_191456	487	.	.	.	0	0.333333	0	0	0	0	0	0.69	0	0.31	0	0	0	0	0	0
Am_Tr_191457	365	.	.	.	0	0	0.803333	0	0	0	0	0	0	0	0	2.41	0	0	0	0
Am_Tr_191458	429	.	.	.	0	3.04667	0	0	0	0	0	3.94	0.51	4.69	0	0	0	0	0	0
Am_Tr_191459	455	.	.	.	0	0.71	0	0	0	0	0	0.39	0	1.74	0	0	0	0	0	0
Am_Tr_191460	355	.	.	.	0	0.196667	0.19	0	0	0	0	0	0	0.59	0.57	0	0	0	0	0
Am_Tr_191461	213	AKU77251.1_MutL-like protein 1, partial [Pelargonium x hortorum]	AT4G09140.2_MUTL-homologue 1, GeneName=MLH1	.	0	0	1.31	0	0	0	0	0	0	0	3.93	0	0	0	0	0
Am_Tr_191462	1209	XP_026285670.1_dynamin-like 120 kDa protein, mitochondrial [Frankliniella occidentalis]	AT2G14120.4_dynamin related protein, GeneName=DRP3B	IPR045063_Dynamin, N-terminal; IPR022812_Dynamin; IPR027417_P-loop containing nucleoside triphosphate hydrolase; IPR045817_Dynamin-like GTPase OPA1, C-terminal	0	0.0266667	0.286667	0	0	0	0	0	0	0.08	0.75	0	0.11	0	0	0
Am_Tr_191463	3340	XP_034255275.1_dynamin-like 120 kDa protein, mitochondrial isoform X2 [Thrips palmi]	AT4G33650.1_dynamin-related protein 3A, GeneName=DRP3A	IPR045817_Dynamin-like GTPase OPA1, C-terminal; IPR022812_Dynamin; IPR027417_P-loop containing nucleoside triphosphate hydrolase; IPR001401_Dynamin, GTPase domain; IPR045063_Dynamin, N-terminal	0	0	0.856667	0	0	0	0	0	0	0	2.37	0.2	0	0	0	0
Am_Tr_191464	3271	XP_034255275.1_dynamin-like 120 kDa protein, mitochondrial isoform X2 [Thrips palmi]	AT4G33650.1_dynamin-related protein 3A, GeneName=DRP3A	IPR027417_P-loop containing nucleoside triphosphate hydrolase; IPR045817_Dynamin-like GTPase OPA1, C-terminal; IPR045063_Dynamin, N-terminal; IPR022812_Dynamin; IPR001401_Dynamin, GTPase domain	0	0	0.156667	0	0	0	0	0	0	0	0	0.24	0.23	0	0	0
Am_Tr_191465	1856	XP_025980497.1_uncharacterized protein LOC100807553 isoform X3 [Glycine max]	AT5G22820.1_ARM repeat superfamily protein	IPR016024_Armadillo-type fold	0	0.436667	0.163333	0.43	0	0	0	0.36	0.53	0.42	0.08	0.16	0.25	0.49	0.41	0.39
Am_Tr_191466	2637	XP_004487545.1_uncharacterized protein LOC101493251 [Cicer arietinum]	AT5G22820.1_ARM repeat superfamily protein	.	0.0366667	0.15	0.16	0.27	0.07	0	0.04	0.12	0.07	0.26	0.17	0.31	0	0.06	0.19	0.56
Am_Tr_191467	440	XP_027926135.1_protein saal1 isoform X4 [Vigna unguiculata]	AT5G22820.1_ARM repeat superfamily protein	.	0	0	0	0.14	0	0	0	0	0	0	0	0	0	0.42	0	0
Am_Tr_191468	1897	XP_004487545.1_uncharacterized protein LOC101493251 [Cicer arietinum]	AT5G22820.3_ARM repeat superfamily protein	IPR016024_Armadillo-type fold	0.446667	2.3	1.52333	2.4	0.87	0.11	0.36	1.57	2.06	3.27	1.23	1.57	1.77	1.26	2.17	3.77
Am_Tr_191469	2746	XP_004487545.1_uncharacterized protein LOC101493251 [Cicer arietinum]	AT5G22820.1_ARM repeat superfamily protein	IPR016024_Armadillo-type fold	0.22	1.35	0.54	0.86	0.08	0.46	0.12	1.51	1.37	1.17	0.38	0.67	0.57	0.61	0.9	1.07
Am_Tr_191470	1893	XP_004487545.1_uncharacterized protein LOC101493251 [Cicer arietinum]	AT5G22820.3_ARM repeat superfamily protein	IPR016024_Armadillo-type fold	0.06	0.77	0.336667	0.87	0.18	0	0	0.89	1.1	0.32	0.58	0	0.43	1.47	0.7	0.44
Am_Tr_191471	2093	XP_014508094.1_uncharacterized protein LOC106767669 [Vigna radiata var. radiata]	AT3G18295.1_DUF1639 family protein, putative (DUF1639)	IPR012438_Protein of unknown function DUF1639	1.60333	5.46667	22.6467	4.69333	1	2.39	1.42	4.51	5.86	6.03	33.65	22.61	11.68	4.69	4.74	4.65
Am_Tr_191472	1160	XP_014508094.1_uncharacterized protein LOC106767669 [Vigna radiata var. radiata]	AT3G18295.1_DUF1639 family protein, putative (DUF1639)	IPR012438_Protein of unknown function DUF1639	3.76667	19.1667	55.3867	11.4833	0.68	5.4	5.22	13.2	19.63	24.67	56.26	68.9	41	9.22	15.07	10.16
Am_Tr_191473	1453	XP_014508094.1_uncharacterized protein LOC106767669 [Vigna radiata var. radiata]	AT1G48770.2_hypothetical protein (DUF1639)	IPR012438_Protein of unknown function DUF1639	0.0666667	0.506667	2.38	0.596667	0	0.2	0	0.21	0.49	0.82	1.95	2.47	2.72	1.34	0.23	0.22
Am_Tr_191474	1704	XP_026272849.1_caspase-1-like [Frankliniella occidentalis] KAE8751626.1 hypothetical protein FOCC_FOCC001474 [Frankliniella occidentalis]	.	IPR015917_Peptidase C14A, caspase catalytic domain; IPR029030_Caspase-like domain superfamily	0	0	0.603333	0	0	0	0	0	0	0	1.4	0.36	0.05	0	0	0
Am_Tr_191475	668	XP_012077350.1_serine/threonine-protein kinase Aurora-1 isoform X1 [Jatropha curcas]	AT4G32830.1_ataurora1, GeneName=AUR1	.	0.62	0	0	0	1.29	0.22	0.35	0	0	0	0	0	0	0	0	0
Am_Tr_191476	244	.	.	.	0	0	0	0	0	0	0	0	0	0	0	0	0	0	0	0
Am_Tr_191477	436	.	.	.	0	0	0	0	0	0	0	0	0	0	0	0	0	0	0	0
Am_Tr_191478	273	.	.	.	0	0	1.67333	0	0	0	0	0	0	0	3.67	0	1.35	0	0	0
Am_Tr_191479	532	.	.	.	0.103333	0.373333	0.433333	0.303333	0	0.31	0	0.59	0	0.53	1.01	0.29	0	0.91	0	0
Am_Tr_191480	1173	XP_026292357.1_delta(24)-sterol reductase-like [Frankliniella occidentalis]	AT3G19820.2_cell elongation protein / DWARF1 / DIMINUTO (DIM), GeneName=DWF1	.	0	0	0.756667	0	0	0	0	0	0	0	2.01	0.09	0.17	0	0	0
Am_Tr_191481	428	.	.	.	0.156667	0	0	0	0	0.47	0	0	0	0	0	0	0	0	0	0
Am_Tr_191482	646	.	.	.	0	0	0.246667	0	0	0	0	0	0	0	0.74	0	0	0	0	0
Am_Tr_191483	559	.	.	.	0.0766667	0.103333	0	0.0933333	0	0	0.23	0	0.31	0	0	0	0	0	0.28	0
Am_Tr_191484	318	.	.	.	0	0	0	0	0	0	0	0	0	0	0	0	0	0	0	0
Am_Tr_191485	484	.	.	.	0.366667	0	0	0.24	0.73	0.37	0	0	0	0	0	0	0	0	0.36	0.36
Am_Tr_191486	485	.	.	.	0.12	0.266667	0.103333	0	0.36	0	0	0	0.8	0	0	0	0.31	0	0	0
Am_Tr_191487	402	.	.	.	0	0.333333	0.313333	0.51	0	0	0	1	0	0	0	0.49	0.45	1.02	0	0.51
Am_Tr_191488	327	.	.	.	0.5	2.64	0.983333	0.273333	0	0	1.5	3.3	0.97	3.65	0.7	0	2.25	0	0	0.82
Am_Tr_191489	535	.	.	.	0.25	0.603333	0.0866667	0	0	0	0.75	0	1.55	0.26	0	0	0.26	0	0	0
Am_Tr_191490	245	XP_004504073.1_BTB/POZ domain-containing protein DOT3 isoform X1 [Cicer arietinum]	.	.	0	0	1.25667	0	0	0	0	0	0	0	3.77	0	0	0	0	0
Am_Tr_191491	678	RZB96770.1_BTB/POZ domain-containing protein DOT3 isoform C [Glycine soja]	AT5G10250.2_Phototropic-responsive NPH3 family protein, GeneName=DOT3	IPR027356_NPH3 domain	0.693333	1.57667	0.26	0.206667	0.42	0.63	1.03	0.75	2.88	1.1	0	0.2	0.58	0.41	0	0.21
Am_Tr_191492	772	.	AT5G13600.1_Phototropic-responsive NPH3 family protein	.	0	0.67	0	0.0566667	0	0	0	0.74	0.87	0.4	0	0	0	0	0	0.17
Am_Tr_191493	371	.	.	.	0	0	0.18	0.203333	0	0	0	0	0	0	0	0	0.54	0.61	0	0
Am_Tr_191494	387	.	.	.	0	0	0	0	0	0	0	0	0	0	0	0	0	0	0	0
Am_Tr_191495	356	KXL42939.1_hypothetical protein FE78DRAFT_109740 [Acidomyces sp. &apos;richmondensis&apos;] KYG49510.1 hypothetical protein M433DRAFT_82008 [Acidomyces richmondensis BFW]	.	.	0	3	0	0	0	0	0	5.29	0.77	2.94	0	0	0	0	0	0
Am_Tr_191496	236	QIX00158.1_hypothetical protein AMS68_005675 [Peltaster fructicola]	.	.	0	0.9	0	0	0	0	0	2.7	0	0	0	0	0	0	0	0
Am_Tr_191497	459	MCI09024.1_retrovirus-related pol polyprotein from transposon TNT 1-94 [Trifolium medium]	.	.	0.536667	0.24	0.346667	0.53	1.61	0	0	0.38	0	0.34	0.33	0.37	0.34	0	1.2	0.39
Am_Tr_191498	875	MCI09024.1_retrovirus-related pol polyprotein from transposon TNT 1-94 [Trifolium medium]	.	.	0.423333	1.01667	0.26	0.343333	0.44	0.59	0.24	1.27	0.64	1.14	0	0.41	0.37	0	0.45	0.58
Am_Tr_191499	284	MCI09024.1_retrovirus-related pol polyprotein from transposon TNT 1-94 [Trifolium medium]	.	.	0.796667	1.3	0.39	0.416667	0	0	2.39	1.27	1.52	1.11	0	0	1.17	0	0	1.25
Am_Tr_191500	1800	XP_035328359.1_glucan 1,3-beta-glucosidase [Colletotrichum scovillei] KAF4775356.1 glucan 1,3-beta-glucosidase [Colletotrichum scovillei] KAG7038976.1 glucan 1 [Colletotrichum scovillei] KAG7041156.1 glucan 1 [Colletotrichum scovillei] KAG7061188.1 glucan 1 [Colletotrichum scovillei]	.	IPR000490_Glycoside hydrolase family 17; IPR017853_Glycoside hydrolase superfamily	0.0166667	0.0966667	5.1	0.183333	0	0	0.05	0.06	0.07	0.16	10.6	1.31	3.39	0	0	0.55
Am_Tr_191501	566	XP_036578674.1_glucan endo-1,3-beta-glucosidase eglC 4 [Colletotrichum truncatum] KAF6786007.1 glucan endo-1,3-beta-glucosidase eglC 4 [Colletotrichum truncatum]	.	.	0	0	0.476667	0.183333	0	0	0	0	0	0	0.91	0.52	0	0.55	0	0
Am_Tr_191502	229	GAQ87020.1_hypothetical protein KFL_003260030 [Klebsormidium nitens]	.	.	0	0	0	1.04667	0	0	0	0	0	0	0	0	0	0	3.14	0
Am_Tr_191503	638	.	.	.	0.14	0.286667	0.263333	0.0766667	0	0.23	0.19	0.66	0	0.2	0.19	0.21	0.39	0	0.23	0
Am_Tr_191504	590	.	.	.	0	0	0.583333	0	0	0	0	0	0	0	1.07	0.24	0.44	0	0	0
Am_Tr_191505	241	VAI07906.1_unnamed protein product [Triticum turgidum subsp. durum]	AT1G68130.2_indeterminate(ID)-domain 14, GeneName=IDD14	.	0	0	0	0	0	0	0	0	0	0	0	0	0	0	0	0
Am_Tr_191506	287	.	.	.	0	0	0	0	0	0	0	0	0	0	0	0	0	0	0	0
Am_Tr_191507	505	MCH91156.1_putative ribonuclease H protein [Trifolium medium]	.	.	0.576667	0	0	0	0.34	0	1.39	0	0	0	0	0	0	0	0	0
Am_Tr_191508	237	.	.	.	0	0	0	0	0	0	0	0	0	0	0	0	0	0	0	0
Am_Tr_191509	1356	GAU21332.1_hypothetical protein TSUD_372270 [Trifolium subterraneum]	.	.	0	0.256667	0.633333	0.0566667	0	0	0	0.16	0.61	0	0.28	1.62	0	0.08	0.09	0
Am_Tr_191510	530	TYI36097.1_hypothetical protein ES332_A03G118600v1 [Gossypium tomentosum]	.	.	0	0.226667	0.0966667	0.1	0	0	0	0	0.68	0	0	0.29	0	0	0	0.3
Am_Tr_191511	668	.	.	.	0.0733333	0.103333	0.376667	0.07	0.22	0	0	0	0.31	0	0.18	0.22	0.73	0.21	0	0
Am_Tr_191512	3308	AFK37717.1_unknown [Lotus japonicus]	AT5G27760.1_Hypoxia-responsive family protein	.	78.96	0	0.01	0.07	173.2	35.1	28.58	0	0	0	0	0	0.03	0.06	0.06	0.09
Am_Tr_191513	3076	AFK37717.1_unknown [Lotus japonicus]	AT3G05550.1_Hypoxia-responsive family protein	.	281.737	0	0.0666667	0.103333	606.18	125.22	113.81	0	0	0	0.11	0.06	0.03	0.07	0.21	0.03
Am_Tr_191514	404	TYI36097.1_hypothetical protein ES332_A03G118600v1 [Gossypium tomentosum]	AT2G43080.2_P4H isoform 1, GeneName=AT-P4H-1	.	0.146667	1.05333	0.563333	0.51	0	0	0.44	0.99	1.73	0.44	1.69	0	0	1.01	0.52	0
Am_Tr_191515	727	.	.	.	0.206667	0.07	0	0.0633333	0	0	0.62	0	0.21	0	0	0	0	0	0.19	0
Am_Tr_191516	806	.	.	.	0.0533333	1.35667	0.286667	0.106667	0	0.16	0	2.36	0.72	0.99	0.27	0.31	0.28	0.32	0	0
Am_Tr_191517	496	.	.	.	0.89	0.423333	0.693333	0.226667	1.05	1.05	0.57	0.67	0	0.6	0.57	0.32	1.19	0.34	0	0.34
Am_Tr_191518	527	XP_004485929.1_pentatricopeptide repeat-containing protein At5g59600-like [Cicer arietinum]	.	.	0	0.38	0.09	0.306667	0	0	0	0.6	0	0.54	0	0	0.27	0.31	0	0.61
Am_Tr_191519	426	TDZ25641.1_Carbamoyl-phosphate synthase arginine-specific small chain [Colletotrichum orbiculare MAFF 240422] TDZ35304.1 Carbamoyl-phosphate synthase arginine-specific small chain [Colletotrichum spinosum] TDZ47733.1 Carbamoyl-phosphate synthase arginine-specific small chain [Colletotrichum trifolii] TEA21791.1 Carbamoyl-phosphate synthase arginine-specific small chain [Colletotrichum sidae]	.	.	0.443333	0	0	0	0	0.94	0.39	0	0	0	0	0	0	0	0	0
Am_Tr_191520	242	CRJ84057.1_hypothetical protein BN1708_016990 [Verticillium longisporum]	.	.	0	0	0.663333	0	0	0	0	0	0	0	1.99	0	0	0	0	0
Am_Tr_191521	853	.	.	.	0.1	0	0	0.61	0.3	0	0	0	0	0	0	0	0	0.3	1.38	0.15
Am_Tr_191522	495	.	.	.	0.353333	0.436667	0.803333	0	0	1.06	0	0.33	0.38	0.6	0.57	0.65	1.19	0	0	0
Am_Tr_191523	353	.	.	.	0.643333	0	0.42	0	0	0.72	1.21	0	0	0	0	0.65	0.61	0	0	0
Am_Tr_191524	341	.	.	.	0	0	0	0	0	0	0	0	0	0	0	0	0	0	0	0
Am_Tr_191525	632	MCH99699.1_V-type proton ATPase subunit B2 [Trifolium medium]	AT4G38510.1_ATPase, V1 complex, subunit B protein, GeneName=VAB2	.	0.283333	0.0866667	0.14	0.0766667	0.47	0	0.38	0	0.26	0	0	0.22	0.2	0.23	0	0
Am_Tr_191526	2342	XP_026273588.1_protein sel-1 homolog 1 [Frankliniella occidentalis] XP_026273589.1 protein sel-1 homolog 1 [Frankliniella occidentalis] XP_026273590.1 protein sel-1 homolog 1 [Frankliniella occidentalis]	AT1G73570.1_HCP-like superfamily protein	IPR006597_Sel1-like repeat	0	0	0.653333	0	0	0	0	0	0	0	1.64	0.21	0.11	0	0	0
Am_Tr_191527	2418	XP_026273588.1_protein sel-1 homolog 1 [Frankliniella occidentalis] XP_026273589.1 protein sel-1 homolog 1 [Frankliniella occidentalis] XP_026273590.1 protein sel-1 homolog 1 [Frankliniella occidentalis]	AT1G73570.1_HCP-like superfamily protein	IPR006597_Sel1-like repeat	0	0	0.103333	0	0	0	0	0	0	0	0.31	0	0	0	0	0
Am_Tr_191528	927	XP_026272522.1_dedicator of cytokinesis protein 1 isoform X3 [Frankliniella occidentalis]	.	.	0	0	0.673333	0	0	0	0	0	0	0	1.65	0.25	0.12	0	0	0
Am_Tr_191529	1553	XP_026272522.1_dedicator of cytokinesis protein 1 isoform X3 [Frankliniella occidentalis]	.	.	0	0	0.733333	0	0	0	0	0	0	0	1.93	0.27	0	0	0	0
Am_Tr_191530	1510	XP_026272521.1_dedicator of cytokinesis protein 1 isoform X2 [Frankliniella occidentalis]	.	IPR027357_DOCKER domain	0	0	0.516667	0	0	0	0	0	0	0	1.3	0	0.25	0	0	0
Am_Tr_191531	235	MCI06242.1_CDPK-related kinase 4-like [Trifolium medium]	AT5G24430.1_Calcium-dependent protein kinase (CDPK) family protein	.	0	0	3.05	0	0	0	0	0	0	0	9.15	0	0	0	0	0
Am_Tr_191532	360	.	.	.	0	0	0.193333	0.216667	0	0	0	0	0	0	0	0	0.58	0	0	0.65
Am_Tr_191533	277	KAG2682562.1_hypothetical protein I3760_11G196200 [Carya illinoinensis] KAG7957870.1 hypothetical protein I3843_11G196900 [Carya illinoinensis]	AT1G55915.1_zinc ion binding protein	.	0.486667	0.81	1.22	0.47	1.46	0	0	0	0	2.43	2.32	1.34	0	0	1.41	0
Am_Tr_191534	289	.	.	.	0	0	0	0.396667	0	0	0	0	0	0	0	0	0	1.19	0	0
Am_Tr_191535	427	TFK78907.1_glycoside hydrolase family 37 protein, partial [Polyporus arcularius HHB13444]	.	IPR008928_Six-hairpin glycosidase superfamily; IPR001661_Glycoside hydrolase, family 37	0	0	0	0	0	0	0	0	0	0	0	0	0	0	0	0
Am_Tr_191536	390	TFK78907.1_glycoside hydrolase family 37 protein, partial [Polyporus arcularius HHB13444]	.	IPR001661_Glycoside hydrolase, family 37; IPR008928_Six-hairpin glycosidase superfamily	0	0	0	0	0	0	0	0	0	0	0	0	0	0	0	0
Am_Tr_191537	2049	.	.	.	0	0.116667	0.146667	0	0	0	0	0	0.17	0.18	0	0.44	0	0	0	0
Am_Tr_191538	1651	.	.	.	0	0.0433333	0.0933333	0.246667	0	0	0	0.13	0	0	0	0	0.28	0.2	0.41	0.13
Am_Tr_191539	640	XP_046136763.1_transcription initiation factor IID, 18kD subunit-domain-containing protein [Fusarium solani] KAH7272146.1 transcription initiation factor IID, 18kD subunit-domain-containing protein [Fusarium solani]	AT1G02680.1_TBP-associated factor 13, GeneName=TAF13	IPR009072_Histone-fold; IPR003195_Transcription initiation factor IID, subunit 13	0.836667	0	0	0	0	0.46	2.05	0	0	0	0	0	0	0	0	0
Am_Tr_191540	291	.	.	.	0	0	1.36	0	0	0	0	0	0	0	2.95	1.13	0	0	0	0
Am_Tr_191541	292	.	.	.	0.36	0	0	0	0	0	1.08	0	0	0	0	0	0	0	0	0
Am_Tr_191542	2427	KAE8741481.1_hypothetical protein FOCC_FOCC012987 [Frankliniella occidentalis]	AT1G04980.1_PDI-like 2-2, GeneName=PDIL2-2	IPR036249_Thioredoxin-like superfamily; IPR005788_Disulphide isomerase; IPR013766_Thioredoxin domain	0	0.106667	3.46667	0	0	0	0	0	0.28	0.04	8.21	1.27	0.92	0	0	0
Am_Tr_191543	1188	QMV80805.1_protein disulfide isomerase 14 [Clitoria ternatea]	AT1G04980.1_PDI-like 2-2, GeneName=PDIL2-2	IPR036249_Thioredoxin-like superfamily; IPR005788_Disulphide isomerase; IPR013766_Thioredoxin domain	0	0	0.446667	0	0	0	0	0	0	0	0	0	1.34	0	0	0
Am_Tr_191544	406	KAE8748113.1_hypothetical protein FOCC_FOCC005116 [Frankliniella occidentalis]	.	.	0	0	0.14	0	0	0	0	0	0	0	0.42	0	0	0	0	0
Am_Tr_191545	1237	KAE9585825.1_putative DNA-formamidopyrimidine glycosylase, DNA-(apurinic or apyrimidinic site) lyase [Lupinus albus] KAF1859252.1 hypothetical protein Lal_00009836 [Lupinus albus]	.	.	1.05	0.0566667	0.253333	0.0633333	0.76	0.62	1.77	0.09	0	0.08	0.23	0.53	0	0	0.1	0.09
Am_Tr_191546	1281	KAE9585825.1_putative DNA-formamidopyrimidine glycosylase, DNA-(apurinic or apyrimidinic site) lyase [Lupinus albus] KAF1859252.1 hypothetical protein Lal_00009836 [Lupinus albus]	.	.	0.29	0.0333333	0.13	0.08	0	0	0.87	0	0.1	0	0	0	0.39	0.24	0	0
Am_Tr_191547	268	.	.	.	0	0	0	0.53	0	0	0	0	0	0	0	0	0	0	1.59	0
Am_Tr_191548	447	.	.	.	0.64	0	0.11	0.186667	0	0.61	1.31	0	0	0	0	0	0.33	0.56	0	0
Am_Tr_191549	351	.	.	.	0	0	0.193333	0	0	0	0	0	0	0	0.58	0	0	0	0	0
Am_Tr_191550	294	.	.	.	0	0	0	0	0	0	0	0	0	0	0	0	0	0	0	0
Am_Tr_191551	1048	KAB2619299.1_hypothetical protein D8674_015168 [Pyrus ussuriensis x Pyrus communis]	ATMG00810.1_DNA/RNA polymerases superfamily protein, GeneName=ORF240B	IPR043502_DNA/RNA polymerase superfamily	0	0	0	0.12	0	0	0	0	0	0	0	0	0	0.12	0.24	0
Am_Tr_191552	543	QHO49946.1_polyprotein [Arachis hypogaea]	.	IPR028919_Viral movement protein	0.396667	0.0933333	0.0833333	0.293333	1.19	0	0	0.28	0	0	0	0	0.25	0	0	0.88
Am_Tr_191553	259	MCH86406.1_hypothetical protein [Trifolium medium]	.	.	2.46333	0	0	0	5.66	0	1.73	0	0	0	0	0	0	0	0	0
Am_Tr_191554	4360	XP_026284530.1_protein argonaute-2 isoform X1 [Frankliniella occidentalis]	AT1G48410.1_Stabilizer of iron transporter SufD / Polynucleotidyl transferase, GeneName=AGO1	IPR003100_PAZ domain; IPR032472_Argonaute linker 2 domain; IPR032473_Protein argonaute, Mid domain; IPR014811_Argonaute, linker 1 domain; IPR032474_Protein argonaute, N-terminal; IPR036085_PAZ domain superfamily; IPR012337_Ribonuclease H-like superfamily; IPR003165_Piwi domain	0	0.02	1.09667	0	0	0	0	0	0	0.06	2.7	0.2	0.39	0	0	0
Am_Tr_191555	390	.	.	.	0	0	0.48	0	0	0	0	0	0	0	0	0	1.44	0	0	0
Am_Tr_191556	399	KYP72170.1_hypothetical protein KK1_004754 [Cajanus cajan] KYP72182.1 hypothetical protein KK1_004768 [Cajanus cajan]	.	.	0.15	0	0.303333	0	0	0	0.45	0	0	0	0	0	0.91	0	0	0
Am_Tr_191557	343	XP_004357146.1_calponin domain containing protein [Acanthamoeba castellanii str. Neff] ELR24991.1 calponin domain containing protein [Acanthamoeba castellanii str. Neff]	.	IPR003096_Smooth muscle protein/calponin; IPR001715_Calponin homology domain; IPR036872_CH domain superfamily	0	0.213333	0	0.73	0	0	0	0	0	0.64	0	0	0	1.46	0	0.73
Am_Tr_191558	1087	XP_028118669.1_ABC transporter A family member 1-like [Camellia sinensis]	AT2G41700.2_ATP-binding cassette A1, GeneName=ABCA1	.	0.0666667	0.08	0.0733333	0.186667	0	0.11	0.09	0	0.24	0	0	0.13	0.09	0.22	0.34	0
Am_Tr_191559	457	PQP94893.1_hypothetical protein Pyn_04462 [Prunus yedoensis var. nudiflora]	AT2G41700.2_ATP-binding cassette A1, GeneName=ABCA1	.	0.136667	0.13	0.203333	0.263333	0.41	0	0	0.39	0	0	0.33	0.28	0	0.39	0.4	0
Am_Tr_191560	635	XP_026293788.1_uncharacterized protein LOC113217913 [Frankliniella occidentalis] KAE8743946.1 hypothetical protein FOCC_FOCC009409 [Frankliniella occidentalis]	.	IPR010009_Apolipophorin-III	0	0	1.11333	0	0	0	0	0	0	0	0	0	3.34	0	0	0
Am_Tr_191561	376	.	.	.	0.406667	0	0	0.393333	1.22	0	0	0	0	0	0	0	0	1.18	0	0
Am_Tr_191562	407	KYP31853.1_Retrovirus-related Pol polyprotein from transposon TNT 1-94 [Cajanus cajan]	.	.	0	0	0	0.263333	0	0	0	0	0	0	0	0	0	0	0	0.79
Am_Tr_191563	481	RVW14620.1_Retrovirus-related Pol polyprotein from transposon TNT 1-94 [Vitis vinifera]	.	.	0	0	0	0.413333	0	0	0	0	0	0	0	0	0	0	0.74	0.5
Am_Tr_191564	524	AYF52918.1_translation elongation factor 1-alpha, partial [Classicula sinensis]	AT1G07930.1_GTP binding Elongation factor Tu family protein	IPR004161_Translation elongation factor EFTu-like, domain 2; IPR009000_Translation protein, beta-barrel domain superfamily; IPR027417_P-loop containing nucleoside triphosphate hydrolase	0	0.59	0	0.416667	0	0	0	0	0.69	1.08	0	0	0	0.93	0.32	0
Am_Tr_191565	283	ALI88669.1_translation elongation factor 1-alpha, partial [Bipolaris maydis]	AT1G07930.1_GTP binding Elongation factor Tu family protein	.	0	0	0	0.423333	0	0	0	0	0	0	0	0	0	1.27	0	0
Am_Tr_191566	324	UIC51879.1_translation elongation factor 1-alpha, partial [Acaulium stercorarius] UIC51880.1 translation elongation factor 1-alpha, partial [Acaulium stercorarius] UIC51881.1 translation elongation factor 1-alpha, partial [Acaulium stercorarius]	AT1G07930.1_GTP binding Elongation factor Tu family protein	IPR004161_Translation elongation factor EFTu-like, domain 2; IPR009000_Translation protein, beta-barrel domain superfamily	0	2.03333	0	0	0	0	0	0.85	3	2.25	0	0	0	0	0	0
Am_Tr_191567	554	AWB11394.1_translation elongation factor 1a, partial [Trametes gibbosa]	AT1G07930.1_GTP binding Elongation factor Tu family protein	IPR009000_Translation protein, beta-barrel domain superfamily; IPR004161_Translation elongation factor EFTu-like, domain 2; IPR027417_P-loop containing nucleoside triphosphate hydrolase	0	0	0	0	0	0	0	0	0	0	0	0	0	0	0	0
Am_Tr_191568	235	AMW90943.1_elongation factor 1 alpha 1, partial [Anisakis pegreffii] AMW90944.1 elongation factor 1 alpha 1, partial [Anisakis simplex] ATI96588.1 translation elongation factor 1-alpha, partial [Anisakis simplex x Anisakis pegreffii] AQW41360.1 elongation factor subunit 1, partial [Anisakis pegreffii] AQW41361.1 elongation factor subunit 1, partial [Anisakis pegreffii]	AT1G07930.2_GTP binding Elongation factor Tu family protein	.	0.976667	0	0	0	2.93	0	0	0	0	0	0	0	0	0	0	0
Am_Tr_191569	493	CAF4481958.1_unnamed protein product, partial [Rotaria socialis]	AT1G07930.2_GTP binding Elongation factor Tu family protein	IPR000795_Translational (tr)-type GTP-binding domain; IPR027417_P-loop containing nucleoside triphosphate hydrolase	0.193333	0	0.3	0.113333	0	0	0.58	0	0	0	0	0	0.9	0	0	0.34
Am_Tr_191570	691	BAN37425.1_elongation factor 1-alpha [Cercozoa sp. DMV]	AT1G07930.2_GTP binding Elongation factor Tu family protein	IPR000795_Translational (tr)-type GTP-binding domain; IPR027417_P-loop containing nucleoside triphosphate hydrolase	0.79	0	0	0	0.2	1.84	0.33	0	0	0	0	0	0	0	0	0
Am_Tr_191571	500	BAN37425.1_elongation factor 1-alpha [Cercozoa sp. DMV]	AT1G07930.2_GTP binding Elongation factor Tu family protein	IPR000795_Translational (tr)-type GTP-binding domain; IPR027417_P-loop containing nucleoside triphosphate hydrolase	0	0	0	0.336667	0	0	0	0	0	0	0	0	0	0.34	0	0.67
Am_Tr_191572	529	ADK90072.1_elongation factor 1 alpha, partial [Corallomyxa tenera]	AT1G07930.1_GTP binding Elongation factor Tu family protein	IPR000795_Translational (tr)-type GTP-binding domain; IPR027417_P-loop containing nucleoside triphosphate hydrolase	1.12667	0	0	0	1.87	1.25	0.26	0	0	0	0	0	0	0	0	0
Am_Tr_191573	204	TAQ97966.1_elongation factor 1-alpha [Lactiplantibacillus plantarum]	AT1G07930.2_GTP binding Elongation factor Tu family protein	.	0	0	0	0	0	0	0	0	0	0	0	0	0	0	0	0
Am_Tr_191574	360	QKY88828.1_translation elongation factor 1-alpha, partial [Ustilago esculenta] QKY88829.1 translation elongation factor 1-alpha, partial [Ustilago esculenta] QKY88830.1 translation elongation factor 1-alpha, partial [Ustilago esculenta] QKY88831.1 translation elongation factor 1-alpha, partial [Ustilago esculenta] QKY88832.1 translation elongation factor 1-alpha, partial [Ustilago esculenta]	AT1G07930.2_GTP binding Elongation factor Tu family protein	IPR000795_Translational (tr)-type GTP-binding domain; IPR027417_P-loop containing nucleoside triphosphate hydrolase	0	0.403333	0.763333	0.223333	0	0	0	0.64	0	0.57	0.55	0	1.74	0	0.67	0
Am_Tr_191575	370	ASK85679.1_translation elongation factor 1-alpha, partial [Leptographium trypodendri] ASK85680.1 translation elongation factor 1-alpha, partial [Leptographium trypodendri] ASK85681.1 translation elongation factor 1-alpha, partial [Leptographium trypodendri]	AT1G07930.2_GTP binding Elongation factor Tu family protein	IPR000795_Translational (tr)-type GTP-binding domain; IPR027417_P-loop containing nucleoside triphosphate hydrolase	0.213333	0	0.18	0	0	0.64	0	0	0	0	0	0	0.54	0	0	0
Am_Tr_191576	343	.	.	.	0	0.213333	0	0	0	0	0	0	0	0.64	0	0	0	0	0	0
Am_Tr_191577	323	.	.	.	0	0.25	0	0	0	0	0	0	0	0.75	0	0	0	0	0	0
Am_Tr_191578	1562	.	.	.	0	0.22	0.226667	0.07	0	0	0	0.66	0	0	0	0	0.68	0	0	0.21
Am_Tr_191579	2086	KHN49021.1_hypothetical protein glysoja_031232, partial [Glycine soja]	.	.	0.206667	0.536667	0.403333	0.356667	0.51	0.06	0.05	0.44	0.49	0.68	0.73	0.28	0.2	0.67	0.4	0
Am_Tr_191580	334	.	.	.	0	0	0	0	0	0	0	0	0	0	0	0	0	0	0	0
Am_Tr_191581	531	KAH1142575.1_hypothetical protein GYH30_033331 [Glycine max] KAH1220921.1 hypothetical protein GmHk_12G034449 [Glycine max]	.	.	0.206667	0.226667	0.253333	0.206667	0.31	0.31	0	0	0.68	0	0.76	0	0	0	0.62	0
Am_Tr_191582	373	KAF1912364.1_class I glutamine amidotransferase-like protein [Ampelomyces quisqualis]	.	IPR029062_Class I glutamine amidotransferase-like	0	0.406667	0	0	0	0	0	0	0.69	0.53	0	0	0	0	0	0
Am_Tr_191583	439	.	.	.	0.146667	0.283333	0.123333	0.856667	0.44	0	0	0	0.48	0.37	0	0	0.37	0	0.44	2.13
Am_Tr_191584	602	.	.	.	0.0833333	0.703333	0.46	0.25	0.25	0	0	0.24	1.65	0.22	0	1.17	0.21	0.25	0	0.5
Am_Tr_191585	745	.	.	.	0	0.976667	1.14333	0.606667	0	0	0	0	0.4	2.53	0	1.88	1.55	0	0.55	1.27
Am_Tr_191586	923	.	.	.	0.0466667	0.0866667	0.113333	0.0466667	0	0.14	0	0.26	0	0	0.34	0	0	0	0.14	0
Am_Tr_191587	983	XP_026274817.1_protein ABHD18 isoform X2 [Frankliniella occidentalis]	.	IPR019149_Alpha/beta hydrolase domain-containing protein 18; IPR029058_Alpha/Beta hydrolase fold	0	0.0466667	0.453333	0	0	0	0	0	0.14	0	1.15	0	0.21	0	0	0
Am_Tr_191588	810	GAU10013.1_hypothetical protein TSUD_415800, partial [Trifolium subterraneum]	AT3G24430.1_ATP binding protein, GeneName=HCF101	IPR026960_Reverse transcriptase zinc-binding domain	0	0.273333	0.233333	0	0	0	0	0.16	0.36	0.3	0.27	0.15	0.28	0	0	0
Am_Tr_191589	230	KCW82751.1_hypothetical protein EUGRSUZ_C041311, partial [Eucalyptus grandis]	AT3G24430.1_ATP binding protein, GeneName=HCF101	.	0	0.75	1.69667	0	0	0	0	0	0	2.25	5.09	0	0	0	0	0
Am_Tr_191590	764	KAF2026792.1_protein translation factor SUI1 [Setomelanomma holmii] KAH7095172.1 protein translation factor SUI1 [Paraphoma chrysanthemicola]	AT1G54290.1_Translation initiation factor SUI1 family protein	IPR001950_SUI1 domain; IPR036877_SUI1 domain superfamily; IPR005874_Eukaryotic translation initiation factor SUI1	0	0.106667	0	0.756667	0	0	0	0.17	0	0.15	0	0	0	2.09	0	0.18
Am_Tr_191591	707	TKY59012.1_Glucan endo-1,3-beta-glucosidase 11 [Spatholobus suberectus]	.	.	0.12	0	0.433333	0	0.36	0	0	0	0	0	1.27	0.03	0	0	0	0
Am_Tr_191592	1846	XP_013456803.1_glucan endo-1,3-beta-glucosidase 14 isoform X2 [Medicago truncatula] KEH30834.1 glycoside hydrolase family 17 protein [Medicago truncatula] RHN62112.1 putative glucan endo-1,3-beta-D-glucosidase [Medicago truncatula]	AT4G18340.1_Glycosyl hydrolase superfamily protein	IPR000490_Glycoside hydrolase family 17; IPR017853_Glycoside hydrolase superfamily	0.943333	0	0.516667	0	0.07	0.65	2.11	0	0	0	0.7	0.49	0.36	0	0	0
Am_Tr_191593	1952	XP_013456803.1_glucan endo-1,3-beta-glucosidase 14 isoform X2 [Medicago truncatula] KEH30834.1 glycoside hydrolase family 17 protein [Medicago truncatula] RHN62112.1 putative glucan endo-1,3-beta-D-glucosidase [Medicago truncatula]	AT4G18340.1_Glycosyl hydrolase superfamily protein	IPR000490_Glycoside hydrolase family 17; IPR017853_Glycoside hydrolase superfamily	0.01	0.06	0.13	0	0	0	0.03	0	0.18	0	0	0	0.39	0	0	0
Am_Tr_191594	1162	AES90110.2_animal cytomegalovirus UL139 protein [Medicago truncatula] RHN62110.1 putative herpesvirus UL139, cytomegalovirus [Medicago truncatula]	AT2G34580.1_cytomegalovirus UL139 protein	IPR021042_Herpesvirus UL139, cytomegalovirus	0.186667	0.243333	0.716667	0.1	0	0.41	0.15	0.29	0	0.44	0.34	0.48	1.33	0	0.1	0.2
Am_Tr_191595	1190	XP_035336451.1_60S ribosomal protein L2 [Colletotrichum scovillei] EXF73040.1 60S ribosomal protein L2 [Colletotrichum fioriniae PJ7] KXH50980.1 60S ribosomal protein L2 [Colletotrichum simmondsii] KXH51664.1 60S ribosomal protein L2 [Colletotrichum nymphaeae SA-01] KAF4783448.1 60S ribosomal protein L2 [Colletotrichum scovillei] KAG7051788.1 60S ribosomal protein L2 [Colletotrichum scovillei]	AT2G18020.1_Ribosomal protein L2 family, GeneName=EMB2296	IPR002171_Ribosomal protein L2; IPR022666_Ribosomal Proteins L2, RNA binding domain; IPR012340_Nucleic acid-binding, OB-fold; IPR022669_Ribosomal protein L2, C-terminal; IPR008991_Translation protein SH3-like domain superfamily	0.1	0.15	14.81	0.106667	0.1	0.2	0	0.19	0	0.26	21.31	7.87	15.25	0.2	0	0.12
Am_Tr_191596	1094	KAF0644223.1_hypothetical protein FPSE5266_04794 [Fusarium pseudograminearum]	AT2G18020.1_Ribosomal protein L2 family, GeneName=EMB2296	IPR022666_Ribosomal Proteins L2, RNA binding domain; IPR012340_Nucleic acid-binding, OB-fold; IPR002171_Ribosomal protein L2; IPR008991_Translation protein SH3-like domain superfamily; IPR022669_Ribosomal protein L2, C-terminal	9.47	0	0.03	0.0366667	0.44	1.88	26.09	0	0	0	0.09	0	0	0	0.11	0
Am_Tr_191597	1185	KAF0644223.1_hypothetical protein FPSE5266_04794 [Fusarium pseudograminearum]	AT2G18020.1_Ribosomal protein L2 family, GeneName=EMB2296	IPR012340_Nucleic acid-binding, OB-fold; IPR002171_Ribosomal protein L2; IPR008991_Translation protein SH3-like domain superfamily; IPR022669_Ribosomal protein L2, C-terminal; IPR022666_Ribosomal Proteins L2, RNA binding domain	0.0633333	0	0.44	0.16	0	0.19	0	0	0	0	1.02	0.3	0	0	0	0.48
Am_Tr_191598	477	KMU84675.1_60S ribosomal protein L2 [Coccidioides immitis H538.4]	AT2G18020.1_Ribosomal protein L2 family, GeneName=EMB2296	.	0.18	0	0	0	0	0	0.54	0	0	0	0	0	0	0	0	0
Am_Tr_191599	427	KAG0144112.1_hypothetical protein CROQUDRAFT_660372 [Cronartium quercuum f. sp. fusiforme G11]	AT2G18020.1_Ribosomal protein L2 family, GeneName=EMB2296	IPR008991_Translation protein SH3-like domain superfamily; IPR022669_Ribosomal protein L2, C-terminal	0	0	0.143333	0.75	0	0	0	0	0	0	0	0.43	0	0.9	0	1.35
Am_Tr_191600	284	XP_033459943.1_ribosomal protein L2 [Dissoconium aciculare CBS 342.82] KAF1822907.1 ribosomal protein L2 [Dissoconium aciculare CBS 342.82]	AT2G18020.1_Ribosomal protein L2 family, GeneName=EMB2296	.	0	0	0	0	0	0	0	0	0	0	0	0	0	0	0	0
Am_Tr_191601	396	XP_033459943.1_ribosomal protein L2 [Dissoconium aciculare CBS 342.82] KAF1822907.1 ribosomal protein L2 [Dissoconium aciculare CBS 342.82]	AT2G18020.1_Ribosomal protein L2 family, GeneName=EMB2296	IPR022669_Ribosomal protein L2, C-terminal; IPR008991_Translation protein SH3-like domain superfamily	0	0.753333	0	0	0	0	0	0	1.8	0.46	0	0	0	0	0	0
Am_Tr_191602	281	.	.	.	0	0	0	0	0	0	0	0	0	0	0	0	0	0	0	0
Am_Tr_191603	1081	XP_039682644.1_uncharacterized protein LOC120575882 [Medicago truncatula]	.	IPR003653_Ulp1 protease family, C-terminal catalytic domain; IPR038765_Papain-like cysteine peptidase superfamily	0.113333	0.04	0.07	0	0	0.34	0	0	0.12	0	0	0.21	0	0	0	0
Am_Tr_191604	373	PNX97569.1_nucleotidyltransferase family protein [Trifolium pratense]	AT3G56320.1_PAP/OAS1 substrate-binding domain superfamily	IPR002934_Polymerase, nucleotidyl transferase domain; IPR043519_Nucleotidyltransferase superfamily	0	0.04	0	0.596667	0	0	0	0.12	0	0	0	0	0	0	0	1.79
Am_Tr_191605	802	XP_004502847.1_uncharacterized protein LOC101513710 [Cicer arietinum] XP_012571878.1 uncharacterized protein LOC101513710 [Cicer arietinum] XP_012571879.1 uncharacterized protein LOC101513710 [Cicer arietinum] XP_012571880.1 uncharacterized protein LOC101513710 [Cicer arietinum] XP_027190331.1 uncharacterized protein LOC101513710 [Cicer arietinum] XP_027190332.1 uncharacterized protein LOC1015137…	AT3G56320.1_PAP/OAS1 substrate-binding domain superfamily	IPR002934_Polymerase, nucleotidyl transferase domain; IPR043519_Nucleotidyltransferase superfamily	0.586667	0.643333	0.886667	0.673333	0.31	1.32	0.13	0.92	0.72	0.29	0	1.54	1.12	0.37	0.99	0.66
Am_Tr_191606	651	RDY07030.1_hypothetical protein CR513_08906, partial [Mucuna pruriens]	AT3G51620.3_PAP/OAS1 substrate-binding domain superfamily	IPR043519_Nucleotidyltransferase superfamily	1.17667	0.163333	0	1.61	1.15	2.02	0.36	0	0.49	0	0	0	0	2.58	1.59	0.66
Am_Tr_191607	374	PNX70912.1_nucleotidyltransferase family protein, partial [Trifolium pratense]	AT3G56320.1_PAP/OAS1 substrate-binding domain superfamily	.	0	0	0	0	0	0	0	0	0	0	0	0	0	0	0	0
Am_Tr_191608	436	.	.	.	0	0	0.86	0	0	0	0	0	0	0	2.17	0.41	0	0	0	0
Am_Tr_191609	671	.	.	.	0	0.183333	0	2.17333	0	0	0	0	0	0.55	0	0	0	6.52	0	0
Am_Tr_191610	929	.	.	.	0	0	0	1.63	0	0	0	0	0	0	0	0	0	3.73	1.03	0.13
Am_Tr_191611	342	.	.	.	0	0.216667	0	7.10667	0	0	0	0	0	0.65	0	0	0	20.59	0	0.73
Am_Tr_191612	535	OAL03990.1_hypothetical protein IQ06DRAFT_113298 [Stagonospora sp. SRC1lsM3a]	.	.	0	0.27	0	2.16	0	0	0	0.29	0	0.52	0	0	0	4.81	1.07	0.6
Am_Tr_191613	372	.	.	.	0	0	0	0.23	0	0	0	0	0	0	0	0	0	0.69	0	0
Am_Tr_191614	366	KAH7068813.1_hypothetical protein BKA63DRAFT_569684 [Paraphoma chrysanthemicola]	.	.	0	0.24	0	0.213333	0	0	0	0	0.72	0	0	0	0	0	0.64	0
Am_Tr_191615	734	XP_019453315.1_PREDICTED: basic endochitinase-like [Lupinus angustifolius] OIW06442.1 hypothetical protein TanjilG_05213 [Lupinus angustifolius]	AT5G24090.1_chitinase A, GeneName=CHIA	.	0.526667	0.37	0.496667	0.53	0.56	0.56	0.46	0	1.11	0	0.15	1.02	0.32	0.55	0.19	0.85
Am_Tr_191616	1144	TKY46427.1_Basic endochitinase [Spatholobus suberectus]	AT5G24090.1_chitinase A, GeneName=CHIA	IPR001223_Glycoside hydrolase family 18, catalytic domain; IPR017853_Glycoside hydrolase superfamily	0.946667	4.11667	5.74	2.64667	0.23	1.88	0.73	0.51	6.97	4.87	4.3	4.43	8.49	1.58	2.62	3.74
Am_Tr_191617	521	XP_018710536.1_60S ribosomal protein L12 [Metschnikowia bicuspidata var. bicuspidata NRRL YB-4993] OBA20011.1 60S ribosomal protein L12 [Metschnikowia bicuspidata var. bicuspidata NRRL YB-4993] GEQ71402.1 hypothetical protein JCM33374_g5085 [Metschnikowia sp. JCM 33374]	AT5G60670.1_Ribosomal protein L11 family protein	IPR020784_Ribosomal protein L11, N-terminal; IPR036796_Ribosomal protein L11/L12, N-terminal domain superfamily; IPR000911_Ribosomal protein L11/L12; IPR036769_Ribosomal protein L11, C-terminal domain superfamily; IPR020783_Ribosomal protein L11, C-terminal	0	0	0.893333	0	0	0	0	0	0	0	0.78	0	1.9	0	0	0
Am_Tr_191618	263	.	.	.	0	21.6167	0.47	3.86	0	0	0	48.8	10.18	5.87	1.41	0	0	6.6	1.71	3.27
Am_Tr_191619	239	TQD78115.1_hypothetical protein C1H46_036345 [Malus baccata]	AT1G03860.2_prohibitin 2, GeneName=PHB2	.	0	0.846667	0	0	0	0	0	2.54	0	0	0	0	0	0	0	0
Am_Tr_191620	234	TQD78115.1_hypothetical protein C1H46_036345 [Malus baccata]	AT4G28510.1_prohibitin 1, GeneName=PHB1	.	0	1.16	0	0	0	0	0	0	3.48	0	0	0	0	0	0	0
Am_Tr_191621	364	TQD78115.1_hypothetical protein C1H46_036345 [Malus baccata]	AT4G28510.1_prohibitin 1, GeneName=PHB1	IPR000163_Prohibitin	0	0.21	0	0	0	0	0	0.63	0	0	0	0	0	0	0	0
Am_Tr_191622	256	.	.	.	0	2.5	0	0	0	0	0	7.5	0	0	0	0	0	0	0	0
Am_Tr_191623	540	XP_020208938.1_putative pentatricopeptide repeat-containing protein At3g01580 [Cajanus cajan]	.	.	0	0.0866667	0.0866667	0.293333	0	0	0	0	0	0.26	0	0	0.26	0.29	0	0.59
Am_Tr_191624	363	.	.	.	0	1.41667	0	0	0	0	0	0	3.69	0.56	0	0	0	0	0	0
Am_Tr_191625	217	XP_033463450.1_uncharacterized protein K489DRAFT_115448 [Dissoconium aciculare CBS 342.82] KAF1826414.1 hypothetical protein K489DRAFT_115448 [Dissoconium aciculare CBS 342.82]	.	.	0	3.64667	0	0	0	0	0	0	0	10.94	0	0	0	0	0	0
Am_Tr_191626	302	.	.	.	0	1.06667	0	0	0	0	0	1.04	1.24	0.92	0	0	0	0	0	0
Am_Tr_191627	223	KAH7028583.1_hypothetical protein B0J12DRAFT_325880 [Macrophomina phaseolina]	AT3G51680.1_NAD(P)-binding Rossmann-fold superfamily protein, GeneName=SDR2	.	0	0	0	0	0	0	0	0	0	0	0	0	0	0	0	0
Am_Tr_191628	518	KAF4304044.1_Short-chain dehydrogenase/reductase SDR [Botryosphaeria dothidea]	AT3G51680.1_NAD(P)-binding Rossmann-fold superfamily protein, GeneName=SDR2	IPR002347_Short-chain dehydrogenase/reductase SDR; IPR036291_NAD(P)-binding domain superfamily	0	0	0.53	0	0	0	0	0	0	0	1.59	0	0	0	0	0
Am_Tr_191629	339	.	.	.	0.226667	0.293333	0	0	0	0	0.68	0	0.88	0	0	0	0	0	0	0
Am_Tr_191630	1148	XP_046140168.1_class I glutamine amidotransferase-like protein [Fusarium solani] KAH7275551.1 class I glutamine amidotransferase-like protein [Fusarium solani]	.	IPR002818_DJ-1/PfpI; IPR029062_Class I glutamine amidotransferase-like	0.903333	0	0	0	0.1	0.52	2.09	0	0	0	0	0	0	0	0	0
Am_Tr_191631	295	.	.	.	0	0	0	0	0	0	0	0	0	0	0	0	0	0	0	0
Am_Tr_191632	659	.	.	.	0	0	0.3	0	0	0	0	0	0	0	0.9	0	0	0	0	0
Am_Tr_191633	276	XP_018580040.1_trypsin-3-like [Anoplophora glabripennis]	.	.	0	0	1.29667	0	0	0	0	0	0	0	0	0	3.89	0	0	0
Am_Tr_191634	806	XP_034244959.1_trypsin-3-like [Thrips palmi]	.	IPR009003_Peptidase S1, PA clan; IPR001314_Peptidase S1A, chymotrypsin family; IPR001254_Serine proteases, trypsin domain	0	0	0.926667	0	0	0	0	0	0	0	0	0	2.78	0	0	0
Am_Tr_191635	301	.	.	.	0	0.7	0	1.07	0	0	0	2.1	0	0	0	0	0	1.05	2.16	0
Am_Tr_191636	1160	.	.	.	0.143333	0.27	0.31	0.103333	0.43	0	0	0.39	0.22	0.2	0	0.58	0.35	0	0.21	0.1
Am_Tr_191637	206	.	.	.	0	0	0	0	0	0	0	0	0	0	0	0	0	0	0	0
Am_Tr_191638	218	.	.	.	0	1.18333	0	0	0	0	0	0	0	3.55	0	0	0	0	0	0
Am_Tr_191639	259	.	.	.	0.63	0	0	0	1.89	0	0	0	0	0	0	0	0	0	0	0
Am_Tr_191640	356	.	.	.	0.933333	1.21333	0.213333	0.23	2.09	0.71	0	1.32	2.32	0	0	0.64	0	0	0.69	0
Am_Tr_191641	275	.	.	.	0	0	0.456667	0	0	0	0	0	0	0	0	1.37	0	0	0	0
Am_Tr_191642	561	.	.	.	0	0	0	0	0	0	0	0	0	0	0	0	0	0	0	0
Am_Tr_191643	501	.	.	.	0	0	0.76	0	0	0	0	0	0	0	1.96	0.32	0	0	0	0
Am_Tr_191644	572	XP_033462839.1_uncharacterized protein K489DRAFT_313654 [Dissoconium aciculare CBS 342.82] KAF1825803.1 hypothetical protein K489DRAFT_313654 [Dissoconium aciculare CBS 342.82]	.	.	0	0.626667	0	0	0	0	0	1.05	0.6	0.23	0	0	0	0	0	0
Am_Tr_191645	406	XP_033462900.1_uncharacterized protein K489DRAFT_428323 [Dissoconium aciculare CBS 342.82] KAF1825864.1 hypothetical protein K489DRAFT_428323 [Dissoconium aciculare CBS 342.82]	.	.	0	1.69	0	0	0	0	0	2.45	0	2.62	0	0	0	0	0	0
Am_Tr_191646	737	KAE8748456.1_Focal adhesion kinase 1 variant 2 [Frankliniella occidentalis]	AT3G50730.1_Protein kinase superfamily protein	IPR020635_Tyrosine-protein kinase, catalytic domain; IPR001245_Serine-threonine/tyrosine-protein kinase, catalytic domain; IPR011009_Protein kinase-like domain superfamily	0	0	0.323333	0	0	0	0	0	0	0	0.97	0	0	0	0	0
Am_Tr_191647	692	XP_026286971.1_focal adhesion kinase 1 isoform X3 [Frankliniella occidentalis]	AT3G50730.1_Protein kinase superfamily protein	IPR001245_Serine-threonine/tyrosine-protein kinase, catalytic domain; IPR011009_Protein kinase-like domain superfamily; IPR020635_Tyrosine-protein kinase, catalytic domain	0	0	0.5	0	0	0	0	0	0	0	1.12	0.38	0	0	0	0
Am_Tr_191648	880	XP_004510135.1_E3 ubiquitin-protein ligase ATL4-like [Cicer arietinum]	AT3G60220.1_TOXICOS EN LEVADURA 4, GeneName=ATL4	.	0.42	0	0.176667	0.0466667	0.29	0.15	0.82	0	0	0	0	0.41	0.12	0	0	0.14
Am_Tr_191649	276	RZB50934.1_SMR domain-containing protein isoform C [Glycine soja]	.	.	0	0	0	0	0	0	0	0	0	0	0	0	0	0	0	0
Am_Tr_191650	1756	.	.	.	0.02	0.103333	0.0766667	0.146667	0	0.06	0	0.24	0.07	0	0	0.12	0.11	0.06	0.25	0.13
Am_Tr_191651	299	.	.	.	0	0	0	0	0	0	0	0	0	0	0	0	0	0	0	0
Am_Tr_191652	561	MCH90884.1_hypothetical protein [Trifolium medium]	.	.	0.463333	0.206667	0	0.0933333	0	0	1.39	0	0.62	0	0	0	0	0	0.28	0
Am_Tr_191653	583	RZC01534.1_Auxin response factor 18 isoform E [Glycine soja]	AT3G61830.2_auxin response factor 18, GeneName=ARF18	.	0.163333	0	0	0	0.27	0	0.22	0	0	0	0	0	0	0	0	0
Am_Tr_191654	473	RZC01534.1_Auxin response factor 18 isoform E [Glycine soja]	AT3G61830.2_auxin response factor 18, GeneName=ARF18	.	0.23	0	0	0	0	0.38	0.31	0	0	0	0	0	0	0	0	0
Am_Tr_191655	307	.	.	.	0	0	0	0	0	0	0	0	0	0	0	0	0	0	0	0
Am_Tr_191656	534	MBA0654720.1_hypothetical protein [Gossypium klotzschianum]	AT5G18910.1_Protein kinase superfamily protein	.	0	0.806667	0.166667	0.303333	0	0	0	0.29	1.34	0.79	0.5	0	0	0	0.31	0.6
Am_Tr_191657	379	.	.	.	0.54	0	0.54	0.393333	0	0.61	1.01	0	0	0	0	1.11	0.51	0	1.18	0
Am_Tr_191658	973	.	.	.	0.19	0.0833333	0.216667	0.17	0.13	0.13	0.31	0.25	0	0	0.53	0.12	0	0.25	0.26	0
Am_Tr_191659	284	GBC09583.1_hypothetical protein RclHR1_00090017 [Rhizophagus clarus] GES90507.1 Ca-transporting ATPase [Rhizophagus clarus]	AT1G10130.1_endoplasmic reticulum-type calcium-transporting ATPase 3, GeneName=ECA3	.	0	0	0	0.84	0	0	0	0	0	0	0	0	0	2.52	0	0
Am_Tr_191660	565	KAF6005217.1_Sarcoplasmic/endoplasmic reticulum calcium ATPase 3 [Cyanidiococcus yangmingshanensis]	AT1G10130.1_endoplasmic reticulum-type calcium-transporting ATPase 3, GeneName=ECA3	IPR023298_P-type ATPase, transmembrane domain superfamily; IPR006068_Cation-transporting P-type ATPase, C-terminal	0	0	0	0.453333	0	0	0	0	0	0	0	0	0	1.09	0	0.27
Am_Tr_191661	441	.	.	.	0	0	0	0.71	0	0	0	0	0	0	0	0	0	1.27	0.86	0
Am_Tr_191662	406	.	.	.	0.343333	0	0	0	1.03	0	0	0	0	0	0	0	0	0	0	0
Am_Tr_191663	393	.	.	.	0.863333	0	0	0	1.1	0.56	0.93	0	0	0	0	0	0	0	0	0
Am_Tr_191664	990	.	.	.	0	0.09	0.19	0.04	0	0	0	0	0.27	0	0.1	0.47	0	0.12	0	0
Am_Tr_191665	226	.	.	.	0	0	0	0	0	0	0	0	0	0	0	0	0	0	0	0
Am_Tr_191666	661	KAG4401105.1_hypothetical protein GLYMA_07G204500v4 [Glycine max] KAH1087765.1 hypothetical protein GYH30_019041 [Glycine max]	AT4G18490.1_hypothetical protein	.	0	0.16	0	0	0	0	0	0	0.48	0	0	0	0	0	0	0
Am_Tr_191667	549	KAG4401105.1_hypothetical protein GLYMA_07G204500v4 [Glycine max] KAH1087765.1 hypothetical protein GYH30_019041 [Glycine max]	AT4G18490.2_hypothetical protein	.	0	0.213333	0.426667	0	0	0	0	0	0.64	0	0	0.54	0.74	0	0	0
Am_Tr_191668	976	KAG4401105.1_hypothetical protein GLYMA_07G204500v4 [Glycine max] KAH1087765.1 hypothetical protein GYH30_019041 [Glycine max]	AT4G18490.1_hypothetical protein	.	0	0	0.143333	0.213333	0	0	0	0	0	0	0.11	0	0.32	0.38	0.26	0
Am_Tr_191669	415	KAE8752280.1_hypothetical protein FOCC_FOCC001073, partial [Frankliniella occidentalis]	.	.	0	0	0.186667	0	0	0	0	0	0	0	0.56	0	0	0	0	0
Am_Tr_191670	450	KAE8752280.1_hypothetical protein FOCC_FOCC001073, partial [Frankliniella occidentalis]	.	.	0	0	0.296667	0	0	0	0	0	0	0	0.89	0	0	0	0	0
Am_Tr_191671	386	.	.	.	0	0	0.466667	0	0	0	0	0	0	0	1.4	0	0	0	0	0
Am_Tr_191672	694	.	.	.	0.16	0	0.11	0	0	0.11	0.37	0	0	0	0.33	0	0	0	0	0
Am_Tr_191673	1895	KYP73779.1_hypothetical protein KK1_006433 [Cajanus cajan]	.	.	0.12	0	0.0966667	0	0.06	0.08	0.22	0	0	0	0	0	0.29	0	0	0
Am_Tr_191674	1904	KYP73779.1_hypothetical protein KK1_006433 [Cajanus cajan]	.	.	0	0.423333	0.07	0.02	0	0	0	0.39	0.43	0.45	0	0.21	0	0	0	0.06
Am_Tr_191675	693	.	.	.	0	0.25	0.356667	0.266667	0	0	0	0	0.22	0.53	0.5	0.57	0	0.6	0.2	0
Am_Tr_191676	787	.	.	.	0	0.27	0.336667	0.113333	0	0	0	0.81	0	0	0	0	1.01	0	0	0.34
Am_Tr_191677	669	.	.	.	0	0.486667	0	0.14	0	0	0	0.62	0.47	0.37	0	0	0	0.42	0	0
Am_Tr_191678	207	.	.	.	0	3.81667	1.83333	0	0	0	0	11.45	0	0	0	0	5.5	0	0	0
Am_Tr_191679	2706	PNX89250.1_retrotransposon Ty-3/Gypsy protein, partial [Trifolium pratense]	.	IPR012337_Ribonuclease H-like superfamily	0.0733333	0.156667	0.09	0.126667	0.04	0.13	0.05	0.39	0	0.08	0	0.12	0.15	0.09	0.29	0
Am_Tr_191680	5170	PNY03339.1_retrotransposon-related protein, partial [Trifolium pratense]	ATMG00860.1_DNA/RNA polymerases superfamily protein, GeneName=ORF158	IPR021109_Aspartic peptidase domain superfamily; IPR000477_Reverse transcriptase domain; IPR043502_DNA/RNA polymerase superfamily	0.193333	0.433333	0.22	0.243333	0.19	0.21	0.18	0.57	0.42	0.31	0.1	0.32	0.24	0.17	0.17	0.39
Am_Tr_191681	357	MCH81844.1_RNA-directed DNA polymerase (Reverse transcriptase) [Trifolium medium]	ATMG00860.1_DNA/RNA polymerases superfamily protein, GeneName=ORF158	IPR043502_DNA/RNA polymerase superfamily	0	0	0	0	0	0	0	0	0	0	0	0	0	0	0	0
Am_Tr_191682	861	BAT83826.1_hypothetical protein VIGAN_04105300, partial [Vigna angularis var. angularis]	.	IPR016197_Chromo-like domain superfamily; IPR023780_Chromo domain	0.05	0.0866667	0.09	0.1	0.15	0	0	0	0	0.26	0	0.14	0.13	0	0	0.3
Am_Tr_191683	315	MCI23566.1_polyprotein-like [Trifolium medium]	.	IPR012337_Ribonuclease H-like superfamily	0	0	0	0	0	0	0	0	0	0	0	0	0	0	0	0
Am_Tr_191684	476	GAU28992.1_hypothetical protein TSUD_391930 [Trifolium subterraneum]	.	IPR041588_Integrase zinc-binding domain	0	0.106667	0	0.243333	0	0	0	0	0	0.32	0	0	0	0.73	0	0
Am_Tr_191685	1836	MCI12591.1_retrovirus-related Pol polyprotein from transposon TNT 1-99 [Trifolium medium]	.	.	0.0566667	0.613333	0.13	0.133333	0.12	0	0.05	0.84	0.38	0.62	0.16	0	0.23	0.24	0	0.16
Am_Tr_191686	3009	MCI12591.1_retrovirus-related Pol polyprotein from transposon TNT 1-99 [Trifolium medium]	.	.	0	0.273333	0.146667	0.143333	0	0	0	0.31	0.42	0.09	0.05	0.23	0.16	0	0.21	0.22
Am_Tr_191687	668	PNY03339.1_retrotransposon-related protein, partial [Trifolium pratense]	.	.	0.0566667	0.8	0.453333	0.353333	0	0	0.17	0.62	1.41	0.37	0.18	1	0.18	0.85	0	0.21
Am_Tr_191688	1139	XP_004488259.1_uncharacterized protein LOC101500384 [Cicer arietinum]	.	.	0.0833333	0	0	0	0.25	0	0	0	0	0	0	0	0	0	0	0
Am_Tr_191689	354	PNY02430.1_retrovirus-related Pol polyprotein from transposon TNT 1-94, partial [Trifolium pratense]	.	IPR012337_Ribonuclease H-like superfamily	0.236667	0	0	0.223333	0.71	0	0	0	0	0	0	0	0	0	0	0.67
Am_Tr_191690	670	.	.	.	0	0	0.563333	0.456667	0	0	0	0	0	0	0.5	1.19	0	0	1.37	0
Am_Tr_191691	666	.	.	.	0.29	0.156667	0.406667	0.48	0	0.87	0	0	0.47	0	0	1.22	0	0	1.44	0
Am_Tr_191692	693	SCV71926.1_BQ2448_4620 [Microbotryum intermedium]	AT1G48130.1_1-cysteine peroxiredoxin 1, GeneName=PER1	IPR019479_Peroxiredoxin, C-terminal; IPR036249_Thioredoxin-like superfamily; IPR024706_Peroxiredoxin, AhpC-type; IPR000866_Alkyl hydroperoxide reductase subunit C/ Thiol specific antioxidant	0	0.06	0	0.666667	0	0	0	0	0	0.18	0	0	0	1.4	0	0.6
Am_Tr_191693	621	XP_035329771.1_uncharacterized protein HER10_EVM0008756 [Colletotrichum scovillei] KAF4776768.1 hypothetical protein HER10_EVM0008756 [Colletotrichum scovillei] KAG7047978.1 transcription initiation factor TFIIH subunit 2 [Colletotrichum scovillei] KAG7060294.1 transcription initiation factor TFIIH subunit 2 [Colletotrichum scovillei] KAG7067745.1 transcription initiation factor TFIIH subunit 2 […	AT1G05055.1_general transcription factor II H2, GeneName=GTF2H2	IPR004595_TFIIH C1-like domain; IPR012170_TFIIH subunit Ssl1/p44	0	0	0.206667	0	0	0	0	0	0	0	0.2	0.22	0.2	0	0	0
Am_Tr_191694	875	KAE8748873.1_hypothetical protein FOCC_FOCC004467 [Frankliniella occidentalis]	AT4G10040.1_cytochrome c-2, GeneName=CYTC-2	IPR009056_Cytochrome c-like domain; IPR036909_Cytochrome c-like domain superfamily; IPR002327_Cytochrome c, class IA/ IB	0	0.243333	17.6967	0.05	0	0	0	0	0.48	0.25	44.39	5.22	3.48	0	0	0.15
Am_Tr_191695	767	KAE8748873.1_hypothetical protein FOCC_FOCC004467 [Frankliniella occidentalis]	AT4G10040.1_cytochrome c-2, GeneName=CYTC-2	IPR036909_Cytochrome c-like domain superfamily; IPR009056_Cytochrome c-like domain; IPR002327_Cytochrome c, class IA/ IB	0	0	1.54	0	0	0	0	0	0	0	0	0	4.62	0	0	0
Am_Tr_191696	257	.	.	.	0	0	0	0.623333	0	0	0	0	0	0	0	0	0	0	1.87	0
Am_Tr_191697	543	.	.	.	0.28	1.18	0.17	0.293333	0	0.6	0.24	1.14	1.63	0.77	0	0	0.51	0.58	0.3	0
Am_Tr_191698	456	KAE8731025.1_hypothetical protein F3Y22_tig00002841pilonHSYRG00191 [Hibiscus syriacus]	AT5G49470.1_PAS domain-containing protein tyrosine kinase family protein	.	0	0	0.116667	0	0	0	0	0	0	0	0	0	0.35	0	0	0
Am_Tr_191699	419	XP_046129183.1_P-loop containing nucleoside triphosphate hydrolase protein [Fusarium solani] KAH7249422.1 P-loop containing nucleoside triphosphate hydrolase protein [Fusarium solani]	AT4G04910.1_AAA-type ATPase family protein, GeneName=NSF	IPR029067_CDC48 domain 2-like superfamily	0.566667	0	0	0	0	0.49	1.21	0	0	0	0	0	0	0	0	0
Am_Tr_191700	426	KXH41219.1_ATPase [Colletotrichum simmondsii]	.	IPR029067_CDC48 domain 2-like superfamily	0	0	0.38	0	0	0	0	0	0	0	1.14	0	0	0	0	0
Am_Tr_191701	863	.	.	.	0	0	0.153333	0.1	0	0	0	0	0	0	0	0.14	0.32	0.15	0	0.15
Am_Tr_191702	2471	XP_004498241.1_two-component response regulator ORR21 [Cicer arietinum] XP_004498242.1 two-component response regulator ORR21 [Cicer arietinum]	AT2G01760.1_response regulator 14, GeneName=RR14	IPR017930_Myb domain; IPR011006_CheY-like superfamily; IPR006447_Myb domain, plants; IPR001789_Signal transduction response regulator, receiver domain; IPR009057_Homeobox-like domain superfamily	0	0.226667	0.24	0.0766667	0	0	0	0	0.37	0.31	0.54	0.18	0	0.23	0	0
Am_Tr_191703	2197	XP_004498241.1_two-component response regulator ORR21 [Cicer arietinum] XP_004498242.1 two-component response regulator ORR21 [Cicer arietinum]	AT2G01760.1_response regulator 14, GeneName=RR14	IPR017930_Myb domain; IPR011006_CheY-like superfamily; IPR001789_Signal transduction response regulator, receiver domain; IPR009057_Homeobox-like domain superfamily; IPR006447_Myb domain, plants	0	0.126667	0.596667	0.333333	0	0	0	0.13	0.24	0.01	0.52	0.53	0.74	0	0.45	0.55
Am_Tr_191704	1997	XP_004498241.1_two-component response regulator ORR21 [Cicer arietinum] XP_004498242.1 two-component response regulator ORR21 [Cicer arietinum]	AT2G01760.1_response regulator 14, GeneName=RR14	IPR017930_Myb domain; IPR006447_Myb domain, plants; IPR009057_Homeobox-like domain superfamily	0	0	0.07	0	0	0	0	0	0	0	0	0	0.21	0	0	0
Am_Tr_191705	1689	XP_024639734.1_two-component response regulator ORR21 isoform X2 [Medicago truncatula] XP_024640029.1 two-component response regulator ORR21 isoform X2 [Medicago truncatula] KEH40635.1 B-type response regulator [Medicago truncatula]	AT2G01760.3_response regulator 14, GeneName=RR14	.	0.0433333	0.17	0	0.06	0	0.13	0	0.51	0	0	0	0	0	0	0	0.18
Am_Tr_191706	1412	XP_004498241.1_two-component response regulator ORR21 [Cicer arietinum] XP_004498242.1 two-component response regulator ORR21 [Cicer arietinum]	AT2G01760.1_response regulator 14, GeneName=RR14	IPR006447_Myb domain, plants; IPR017930_Myb domain; IPR017053_Response regulator B-type, plant; IPR001789_Signal transduction response regulator, receiver domain; IPR009057_Homeobox-like domain superfamily; IPR011006_CheY-like superfamily	0	0.266667	0.02	0	0	0	0	0.24	0.39	0.17	0	0	0.06	0	0	0
Am_Tr_191707	2591	XP_004498241.1_two-component response regulator ORR21 [Cicer arietinum] XP_004498242.1 two-component response regulator ORR21 [Cicer arietinum]	AT2G01760.1_response regulator 14, GeneName=RR14	IPR017930_Myb domain; IPR011006_CheY-like superfamily; IPR006447_Myb domain, plants; IPR001789_Signal transduction response regulator, receiver domain; IPR009057_Homeobox-like domain superfamily	0	0	0.05	0.06	0	0	0	0	0	0	0	0.15	0	0.18	0	0
Am_Tr_191708	387	TKY69225.1_Two-component response regulator ARR2 [Spatholobus suberectus]	AT4G16110.1_response regulator 2, GeneName=RR2	.	0	0	0	0	0	0	0	0	0	0	0	0	0	0	0	0
Am_Tr_191709	779	TKY69225.1_Two-component response regulator ARR2 [Spatholobus suberectus]	AT4G16110.1_response regulator 2, GeneName=RR2	.	0	0.11	0.0466667	0.113333	0	0	0	0.33	0	0	0.14	0	0	0.34	0	0
Am_Tr_191710	482	.	.	.	0	0.133333	0	0.363333	0	0	0	0	0.4	0	0	0	0	0	0.73	0.36
Am_Tr_191711	969	RYR32619.1_hypothetical protein Ahy_A10g047154 isoform B [Arachis hypogaea]	AT4G11730.1_Cation transporter/ E1-E2 ATPase family protein	.	0	0.206667	0.383333	0.44	0	0	0	0.28	0.34	0	0.58	0.57	0	0.93	0.39	0
Am_Tr_191712	969	KAG2699894.1_hypothetical protein I3760_07G209400 [Carya illinoinensis] KAG6706257.1 hypothetical protein I3842_07G215500 [Carya illinoinensis] KAG7973004.1 hypothetical protein I3843_07G208800 [Carya illinoinensis]	AT4G11730.1_Cation transporter/ E1-E2 ATPase family protein	.	0.363333	0	0.0866667	0.0433333	0.93	0.16	0	0	0	0	0	0.15	0.11	0	0	0.13
Am_Tr_191713	630	XP_022755437.1_plasma membrane ATPase 4-like [Durio zibethinus]	AT2G24520.4_plasma membrane H+-ATPase, GeneName=HA5	.	0	0.0733333	0.473333	0.116667	0	0	0	0.22	0	0	0	1.42	0	0	0.35	0
Am_Tr_191714	567	KAB2629465.1_plasma membrane ATPase 4 [Pyrus ussuriensis x Pyrus communis]	AT2G24520.4_plasma membrane H+-ATPase, GeneName=HA5	.	0.376667	0	0	0	1	0.13	0	0	0	0	0	0	0	0	0	0
Am_Tr_191715	814	KAG7972562.1_hypothetical protein I3843_07G190500 [Carya illinoinensis]	AT4G11730.1_Cation transporter/ E1-E2 ATPase family protein	.	0.33	0	0	0.0533333	0.48	0.51	0	0	0	0	0	0	0	0	0	0.16
Am_Tr_191716	873	RZS02656.1_hypothetical protein BHM03_00032724 [Ensete ventricosum]	AT3G42640.1_H[+]-ATPase 8, GeneName=HA8	.	0.2	0.413333	0.306667	0.326667	0.4	0.2	0	0	1.11	0.13	0.3	0.62	0	0.26	0.72	0
Am_Tr_191717	258	XP_027354682.1_CBL-interacting serine/threonine-protein kinase 12-like isoform X6 [Abrus precatorius]	.	.	0	0	0	0	0	0	0	0	0	0	0	0	0	0	0	0
Am_Tr_191718	528	XP_022755437.1_plasma membrane ATPase 4-like [Durio zibethinus]	AT2G24520.4_plasma membrane H+-ATPase, GeneName=HA5	.	1.04333	0.853333	0.246667	0.29	1.99	1.14	0	2.01	0.55	0	0.47	0	0.27	0	0.87	0
Am_Tr_191719	1093	CAC28222.1_p-type H+-ATPase, partial [Sesbania rostrata]	AT2G24520.4_plasma membrane H+-ATPase, GeneName=HA5	.	0	0.183333	0.11	0	0	0	0	0.28	0.27	0	0	0.33	0	0	0	0
Am_Tr_191720	485	XP_022755437.1_plasma membrane ATPase 4-like [Durio zibethinus]	AT2G24520.4_plasma membrane H+-ATPase, GeneName=HA5	.	0.453333	0.206667	0	0.13	0	0.46	0.9	0	0	0.62	0	0	0	0	0.39	0
Am_Tr_191721	1377	KAG6698424.1_hypothetical protein I3842_08G019700 [Carya illinoinensis]	AT2G24520.4_plasma membrane H+-ATPase, GeneName=HA5	.	0.443333	0.473333	0.566667	0.77	0.59	0.74	0	1.07	0.35	0	0.56	1.07	0.07	0.81	1.5	0
Am_Tr_191722	676	XP_022755437.1_plasma membrane ATPase 4-like [Durio zibethinus]	AT2G24520.4_plasma membrane H+-ATPase, GeneName=HA5	.	0	0	0	0	0	0	0	0	0	0	0	0	0	0	0	0
Am_Tr_191723	449	ADM67773.1_40S ribosomal subunit associated protein, partial [Rhododendron ovatum] ADM67774.1 40S ribosomal subunit associated protein, partial [Rhododendron ellipticum] ADM67775.1 40S ribosomal subunit associated protein, partial [Rhododendron mariesii] ADM67776.1 40S ribosomal subunit associated protein, partial [Rhododendron nakaharae] ADM67777.1 40S ribosomal subunit associated protein, parti…	AT3G04770.2_40s ribosomal protein SA B, GeneName=RPSAb	.	0.843333	0.373333	0.423333	0.28	0.42	2.11	0	0.4	0	0.72	0	0.56	0.71	0	0.84	0
Am_Tr_191724	263	MQL81567.1_hypothetical protein [Colocasia esculenta]	AT3G04770.2_40s ribosomal protein SA B, GeneName=RPSAb	.	0.54	0	0	1.09333	0	0	1.62	0	0	0	0	0	0	1.65	0	1.63
Am_Tr_191725	398	ADM67773.1_40S ribosomal subunit associated protein, partial [Rhododendron ovatum] ADM67774.1 40S ribosomal subunit associated protein, partial [Rhododendron ellipticum] ADM67775.1 40S ribosomal subunit associated protein, partial [Rhododendron mariesii] ADM67776.1 40S ribosomal subunit associated protein, partial [Rhododendron nakaharae] ADM67777.1 40S ribosomal subunit associated protein, parti…	AT3G04770.2_40s ribosomal protein SA B, GeneName=RPSAb	.	0	0.17	0.256667	0	0	0	0	0.51	0	0	0	0.77	0	0	0	0
Am_Tr_191726	347	MQL81567.1_hypothetical protein [Colocasia esculenta]	AT3G04770.2_40s ribosomal protein SA B, GeneName=RPSAb	.	0.213333	0.97	0.213333	2.15333	0	0	0.64	0	1.66	1.25	0	0	0.64	0	2.92	3.54
Am_Tr_191727	476	.	.	.	0	0.106667	0.326667	0	0	0	0	0	0	0.32	0.31	0.35	0.32	0	0	0
Am_Tr_191728	209	.	.	.	3.84	0	0	3.53	5.77	0	5.75	0	0	0	0	0	0	0	10.59	0
Am_Tr_191729	255	KAH1252567.1_Squalene monooxygenase [Glycine max]	AT1G58440.1_FAD/NAD(P)-binding oxidoreductase family protein, GeneName=XF1	.	0	0	4.47	0	0	0	0	0	0	0	7.95	3.68	1.78	0	0	0
Am_Tr_191730	227	MCI01351.1_squalene monooxygenase-like [Trifolium medium]	AT1G58440.1_FAD/NAD(P)-binding oxidoreductase family protein, GeneName=XF1	.	0	0	1.06	0	0	0	0	0	0	0	0	3.18	0	0	0	0
Am_Tr_191731	203	.	.	.	0	0	0	0	0	0	0	0	0	0	0	0	0	0	0	0
Am_Tr_191732	518	.	.	.	0	0.236667	0.283333	0	0	0	0	0	0.71	0	0	0.3	0.55	0	0	0
Am_Tr_191733	858	KXH62441.1_hypothetical protein CNYM01_04696 [Colletotrichum nymphaeae SA-01]	.	.	0	0	0.613333	0	0	0	0	0	0	0	0.5	0.7	0.64	0	0	0
Am_Tr_191734	1756	XP_035335113.1_hexokinase [Colletotrichum scovillei] KAF4782110.1 hexokinase [Colletotrichum scovillei] KXH45479.1 hexokinase [Colletotrichum nymphaeae SA-01]	AT4G29130.1_hexokinase 1, GeneName=HXK1	IPR022672_Hexokinase, N-terminal; IPR022673_Hexokinase, C-terminal; IPR043129_ATPase, nucleotide binding domain	0	0.0166667	0.626667	0.02	0	0	0	0	0	0.05	1.45	0.06	0.37	0	0	0.06
Am_Tr_191735	957	XP_003054311.1_hexokinase [Fusarium vanettenii 77-13-4] EEU48598.1 hexokinase [Fusarium vanettenii 77-13-4]	AT4G29130.1_hexokinase 1, GeneName=HXK1	IPR043129_ATPase, nucleotide binding domain; IPR022673_Hexokinase, C-terminal	0.636667	0	0	0	0	0.65	1.26	0	0	0	0	0	0	0	0	0
Am_Tr_191736	810	XP_026273970.1_gem-associated protein 2 isoform X2 [Frankliniella occidentalis] KAE8750895.1 hypothetical protein FOCC_FOCC002323 [Frankliniella occidentalis]	.	IPR035426_Gemin2/Brr1; IPR017364_Gem-associated protein 2	0	0	0.9	0	0	0	0	0	0	0	2.56	0	0.14	0	0	0
Am_Tr_191737	1065	OAA46172.1_HSP20-like chaperone [Metarhizium rileyi RCEF 4871] TWU79022.1 hypothetical protein ED733_008423 [Metarhizium rileyi]	AT4G02450.2_HSP20-like chaperones superfamily protein	IPR008978_HSP20-like chaperone	0.466667	0	0	0	0	0.57	0.83	0	0	0	0	0	0	0	0	0
Am_Tr_191738	590	KAF8018167.1_hypothetical protein BT93_H3152 [Corymbia citriodora subsp. variegata]	.	.	0	0.0933333	0.123333	0	0	0	0	0	0.28	0	0.37	0	0	0	0	0
Am_Tr_191739	663	KAF8018167.1_hypothetical protein BT93_H3152 [Corymbia citriodora subsp. variegata]	AT1G78955.5_camelliol C synthase 1, GeneName=CAMS1	.	0	0	0.906667	0	0	0	0	0	0	0	1.12	1.42	0.18	0	0	0
Am_Tr_191740	1319	RHN43780.1_putative RNA-directed DNA polymerase [Medicago truncatula]	.	IPR036875_Zinc finger, CCHC-type superfamily	0.07	0.333333	0.2	0.0566667	0	0	0.21	0.28	0.19	0.53	0.29	0.16	0.15	0	0	0.17
Am_Tr_191741	1294	RHN43780.1_putative RNA-directed DNA polymerase [Medicago truncatula]	.	IPR036875_Zinc finger, CCHC-type superfamily	0.223333	0.143333	0.243333	0.09	0.09	0	0.58	0.15	0	0.28	0.31	0.27	0.15	0.09	0.18	0
Am_Tr_191742	244	AAR13298.1_gag-pol polyprotein [Phaseolus vulgaris]	AT5G41000.3_YELLOW STRIPE like 4, GeneName=YSL4	.	0	0	0	0	0	0	0	0	0	0	0	0	0	0	0	0
Am_Tr_191743	271	RHN43780.1_putative RNA-directed DNA polymerase [Medicago truncatula]	.	.	0	0	0	0	0	0	0	0	0	0	0	0	0	0	0	0
Am_Tr_191744	358	KAF7812096.1_Retrovirus-related Pol polyprotein from transposon TNT 1-94 [Senna tora]	.	.	0	0	0	0.446667	0	0	0	0	0	0	0	0	0	0.66	0.68	0
Am_Tr_191745	301	.	.	.	0.37	0.31	0	0.36	1.11	0	0	0	0	0.93	0	0	0	0	1.08	0
Am_Tr_191746	375	.	.	.	0	1.07333	0.376667	0	0	0	0	1.17	2.05	0	0	1.13	0	0	0	0
Am_Tr_191747	319	OMP04054.1_hypothetical protein COLO4_09987 [Corchorus olitorius]	.	.	0	0	0.27	0.293333	0	0	0	0	0	0	0	0	0.81	0	0	0.88
Am_Tr_191748	329	.	.	.	0.983333	0	0	0	0	0	2.95	0	0	0	0	0	0	0	0	0
Am_Tr_191749	536	RSL72811.1_hypothetical protein CEP54_000795 [Fusarium sp. AF-8]	.	.	0.166667	0	0	0	0	0	0.5	0	0	0	0	0	0	0	0	0
Am_Tr_191750	1559	.	.	.	0.0433333	0.136667	0.186667	0.17	0	0.07	0.06	0.14	0.08	0.19	0	0.07	0.49	0	0.44	0.07
Am_Tr_191751	249	WP_120533860.1_MULTISPECIES: CAP domain-containing protein [Corallococcus] RKH16220.1 hypothetical protein D7X74_16135 [Corallococcus sp. CA047B] RKH24701.1 hypothetical protein D7X75_31415 [Corallococcus sp. CA031C] RKI06858.1 hypothetical protein D7Y13_19175 [Corallococcus praedator]	AT1G01310.1_CAP (Cysteine-rich secretory proteins, Antigen 5, and Pathogenesis-related 1 protein) superfamily protein	.	0.693333	0	0	0	0	0	2.08	0	0	0	0	0	0	0	0	0
Am_Tr_191752	638	.	.	.	0.0766667	0	0.0666667	0.153333	0.23	0	0	0	0	0	0	0	0.2	0	0.23	0.23
Am_Tr_191753	304	.	.	.	0	0.34	0	0	0	0	0	1.02	0	0	0	0	0	0	0	0
Am_Tr_191754	316	.	.	.	0.276667	0	0	0	0	0	0.83	0	0	0	0	0	0	0	0	0
Am_Tr_191755	362	.	.	.	0.19	0	0.19	0	0	0	0.57	0	0	0	0	0	0.57	0	0	0
Am_Tr_191756	334	.	.	.	0.556667	0.52	0	0.266667	0	1.67	0	1.56	0	0	0	0	0	0	0.8	0
Am_Tr_191757	457	XP_027188949.1_leucine-rich repeat extensin-like protein 3 [Cicer arietinum]	.	.	0.793333	4.02667	2.86333	2.38	0.41	1.63	0.34	4.86	2.7	4.52	0.99	2.79	4.81	1.18	2.02	3.94
Am_Tr_191758	521	XP_027188949.1_leucine-rich repeat extensin-like protein 3 [Cicer arietinum]	.	.	0.393333	1.35667	0.95	0.946667	0	0.39	0.79	1.22	1.2	1.65	0.26	1.78	0.81	0.31	1.28	1.25
Am_Tr_191759	530	XP_027188949.1_leucine-rich repeat extensin-like protein 3 [Cicer arietinum]	.	.	0.583333	2.14667	0.276667	0.513333	0.62	0.62	0.51	0.31	3.74	2.39	0.25	0.58	0	0	0.93	0.61
Am_Tr_191760	316	.	.	.	2.75333	2.52	0.57	0.303333	4.78	0.98	2.5	2.73	3.23	1.6	0	0.88	0.83	0.91	0	0
Am_Tr_191761	228	.	.	.	0	1.07333	0	0	0	0	0	3.22	0	0	0	0	0	0	0	0
Am_Tr_191762	277	.	.	.	1.36333	0	0.386667	0.453333	1.46	0	2.63	0	0	0	1.16	0	0	0	0	1.36
Am_Tr_191763	266	.	.	.	0	0	0.516667	0	0	0	0	0	0	0	0	1.55	0	0	0	0
Am_Tr_191764	1060	.	.	.	0.0766667	0.453333	0.86	0.456667	0	0.23	0	0.11	0.75	0.5	0.85	0.96	0.77	0.57	0.46	0.34
Am_Tr_191765	598	XP_039682538.1_sucrose synthase 6-like isoform X7 [Medicago truncatula]	AT1G73370.2_sucrose synthase 6, GeneName=SUS6	.	0.0833333	0	0.633333	0.116667	0.25	0	0	0	0	0	1.25	0	0.65	0	0.35	0
Am_Tr_191766	624	XP_039682538.1_sucrose synthase 6-like isoform X7 [Medicago truncatula]	AT1G73370.2_sucrose synthase 6, GeneName=SUS6	.	0	0	0.0833333	0.303333	0	0	0	0	0	0	0	0.25	0	0.28	0.63	0
Am_Tr_191767	662	KAG4400880.1_hypothetical protein GLYMA_07G152567v4 [Glycine max] KAH1086985.1 hypothetical protein GYH30_018489 [Glycine max]	AT5G37180.3_sucrose synthase 5, GeneName=SUS5	.	0.0733333	0	0.646667	0.143333	0.22	0	0	0	0	0	0.54	1.22	0.18	0	0.22	0.21
Am_Tr_191768	435	XP_039682538.1_sucrose synthase 6-like isoform X7 [Medicago truncatula]	AT1G73370.2_sucrose synthase 6, GeneName=SUS6	IPR000368_Sucrose synthase	0	0	0.286667	0.403333	0	0	0	0	0	0	0	0.86	0	1.21	0	0
Am_Tr_191769	474	XP_039682538.1_sucrose synthase 6-like isoform X7 [Medicago truncatula]	AT1G73370.2_sucrose synthase 6, GeneName=SUS6	.	0	0	0.206667	0.123333	0	0	0	0	0	0	0	0.62	0	0	0	0.37
Am_Tr_191770	500	.	.	.	0.116667	0.0966667	0.656667	0	0	0.35	0	0	0	0.29	1.97	0	0	0	0	0
Am_Tr_191771	369	.	.	.	1.33	0.606667	1.07667	0.616667	1.28	0	2.71	1.82	0	0	1.55	0.59	1.09	0.61	0.63	0.61
Am_Tr_191772	284	RZB64795.1_Allantoate deiminase 1 isoform B [Glycine soja]	AT4G20070.1_allantoate amidohydrolase, GeneName=AAH	.	0.446667	1.21667	1.1	0	1.34	0	0	2.54	0	1.11	2.13	0	1.17	0	0	0
Am_Tr_191773	266	RZB64795.1_Allantoate deiminase 1 isoform B [Glycine soja]	AT4G20070.1_allantoate amidohydrolase, GeneName=AAH	.	0.566667	3.26333	0.496667	0	1.7	0	0	6.44	1.94	1.41	0	0	1.49	0	0	0
Am_Tr_191774	2479	KEH18496.1_receptor-like kinase, putative [Medicago truncatula] RHN39500.1 putative protein kinase RLK-Pelle-LRR-III family [Medicago truncatula]	AT3G42880.1_Leucine-rich repeat protein kinase family protein, GeneName=PRK3	IPR013210_Leucine-rich repeat-containing N-terminal, plant-type; IPR001611_Leucine-rich repeat; IPR000719_Protein kinase domain; IPR011009_Protein kinase-like domain superfamily	0	0.03	1.11	0	0	0	0	0	0.09	0	2.23	0.6	0.5	0	0	0
Am_Tr_191775	484	.	.	.	0	0	0	0	0	0	0	0	0	0	0	0	0	0	0	0
Am_Tr_191776	563	.	.	.	0.186667	0.103333	0	0.376667	0.56	0	0	0	0.31	0	0	0	0	0	1.13	0
Am_Tr_191777	326	.	.	.	0	0.246667	0	0	0	0	0	0	0	0.74	0	0	0	0	0	0
Am_Tr_191778	477	.	.	.	0	0.41	0.326667	0.243333	0	0	0	0	1.23	0	0.31	0.35	0.32	0	0	0.73
Am_Tr_191779	492	.	.	.	0	1.99667	0.796667	0.233333	0	0	0	2.36	2.72	0.91	1.16	0.33	0.9	0	0.35	0.35
Am_Tr_191780	232	.	.	.	0	0	0.946667	0	0	0	0	0	0	0	0	2.84	0	0	0	0
Am_Tr_191781	968	.	.	.	0.0766667	0.0766667	0.143333	0.213333	0.13	0	0.1	0.12	0	0.11	0.32	0	0.11	0.38	0	0.26
Am_Tr_191782	263	.	.	.	0	0	0	0	0	0	0	0	0	0	0	0	0	0	0	0
Am_Tr_191783	255	.	.	.	0	0	1.14333	0	0	0	0	0	0	0	1.59	1.84	0	0	0	0
Am_Tr_191784	993	.	.	.	0.756667	0.0366667	0.07	0	0.37	1	0.9	0	0	0.11	0.1	0	0.11	0	0	0
Am_Tr_191785	237	.	.	.	0	1.52667	0.733333	0	0	0	0	0	0	4.58	2.2	0	0	0	0	0
Am_Tr_191786	295	.	.	.	0	0	0	0.88	0	0	0	0	0	0	0	0	0	1.51	1.13	0
Am_Tr_191787	349	.	.	.	0	0.233333	0	0	0	0	0	0.7	0	0	0	0	0	0	0	0
Am_Tr_191788	493	.	.	.	0.236667	0.353333	0	0.23	0	0.71	0	0.67	0.39	0	0	0	0	0.69	0	0
Am_Tr_191789	257	.	.	.	0.6	0	0.593333	0	0	0	1.8	0	0	0	0	1.78	0	0	0	0
Am_Tr_191790	272	.	.	.	1.07	0.493333	0	0.486667	0	3.21	0	1.48	0	0	0	0	0	1.46	0	0
Am_Tr_191791	247	.	.	.	0	0	0	0.733333	0	0	0	0	0	0	0	0	0	0	2.2	0
Am_Tr_191792	269	.	.	.	0	0	0.5	0	0	0	0	0	0	0	1.5	0	0	0	0	0
Am_Tr_191793	904	.	.	.	0.503333	0.24	0.29	0.283333	0.42	0.71	0.38	0.14	0.46	0.12	0.16	0.53	0.18	0	0.71	0.14
Am_Tr_191794	239	.	.	.	0	0.733333	0	0	0	0	0	0	0	2.2	0	0	0	0	0	0
Am_Tr_191795	249	.	.	.	1.46	0	0	0.676667	0	2.3	2.08	0	0	0	0	0	0	0	0	2.03
Am_Tr_191796	456	.	.	.	0.27	0	0	0.403333	0.81	0	0	0	0	0	0	0	0	0.4	0.41	0.4
Am_Tr_191797	323	.	.	.	0	0	0	0	0	0	0	0	0	0	0	0	0	0	0	0
Am_Tr_191798	401	.	.	.	0	0	0.63	0.17	0	0	0	0	0	0	0.43	1.46	0	0.51	0	0
Am_Tr_191799	737	XP_026291364.1_uncharacterized protein LOC113215918 isoform X2 [Frankliniella occidentalis]	.	.	0	0	0.6	0	0	0	0	0	0	0	1.8	0	0	0	0	0
Am_Tr_191800	603	XP_034256113.1_protein tramtrack, beta isoform-like isoform X8 [Thrips palmi]	.	.	0	0	0.596667	0	0	0	0	0	0	0	0.89	0.47	0.43	0	0	0
Am_Tr_191801	1442	XP_046136473.1_uncharacterized protein B0J15DRAFT_225684 [Fusarium solani] KAH7271856.1 hypothetical protein B0J15DRAFT_225684 [Fusarium solani]	.	.	0.503333	0	0	0	0	0.31	1.2	0	0	0	0	0	0	0	0	0
Am_Tr_191802	488	XP_027932253.1_probable aldo-keto reductase 1 [Vigna unguiculata] QCD77648.1 aldo/keto reductase family oxidoreductase [Vigna unguiculata]	AT1G60690.1_NAD(P)-linked oxidoreductase superfamily protein	IPR036812_NADP-dependent oxidoreductase domain superfamily; IPR023210_NADP-dependent oxidoreductase domain	0	0	0	0	0	0	0	0	0	0	0	0	0	0	0	0
Am_Tr_191803	1027	XP_004509711.1_agglutinin-2-like [Cicer arietinum]	AT4G04960.2_Concanavalin A-like lectin protein kinase family protein	IPR016363_Legume lectin; IPR001220_Legume lectin domain; IPR013320_Concanavalin A-like lectin/glucanase domain superfamily	0	0	0	0	0	0	0	0	0	0	0	0	0	0	0	0
Am_Tr_191804	426	XP_003052235.1_uncharacterized protein NECHADRAFT_92815 [Fusarium vanettenii 77-13-4] EEU46522.1 hypothetical protein NECHADRAFT_92815 [Fusarium vanettenii 77-13-4]	.	.	0.39	0	0	0	0	0	1.17	0	0	0	0	0	0	0	0	0
Am_Tr_191805	2694	KAE8745447.1_hypothetical protein FOCC_FOCC007827 [Frankliniella occidentalis]	AT4G19610.1_nucleotide/nucleic acid binding protein	IPR035979_RNA-binding domain superfamily; IPR000504_RNA recognition motif domain	0	0	0.753333	0	0	0	0	0	0	0	1.81	0.29	0.16	0	0	0
Am_Tr_191806	904	XP_046132852.1_WD40-repeat-containing domain protein [Fusarium solani] KAH7263985.1 WD40-repeat-containing domain protein [Fusarium solani]	AT5G64730.1_Transducin/WD40 repeat-like superfamily protein	IPR001680_WD40 repeat; IPR036322_WD40-repeat-containing domain superfamily; IPR020472_G-protein beta WD-40 repeat	0.823333	0	0	0	0.14	0.28	2.05	0	0	0	0	0	0	0	0	0
Am_Tr_191807	1599	XP_004505192.1_protein ALP1-like [Cicer arietinum]	AT3G19120.1_PIF / Ping-Pong family of plant transposase	IPR027806_Harbinger transposase-derived nuclease domain	1.28667	0.79	1.26667	1.29	1.07	1.95	0.84	0.59	0.58	1.2	0.27	2.49	1.04	0	2.74	1.13
Am_Tr_191808	731	KAE8739461.1_hypothetical protein FOCC_FOCC015037 [Frankliniella occidentalis]	.	IPR012337_Ribonuclease H-like superfamily	0	0	0.363333	0	0	0	0	0	0	0	0.93	0	0.16	0	0	0
Am_Tr_191809	757	XP_026289012.1_uncharacterized protein LOC113213996 [Frankliniella occidentalis]	.	IPR017245_BLOC-1 complex, subunit 3	0	0	0.16	0	0	0	0	0	0	0	0.48	0	0	0	0	0
Am_Tr_191810	652	XP_026289012.1_uncharacterized protein LOC113213996 [Frankliniella occidentalis]	.	IPR017245_BLOC-1 complex, subunit 3	0	0	0.663333	0	0	0	0	0	0	0	1.78	0.21	0	0	0	0
Am_Tr_191811	951	.	.	.	0.0433333	1.94333	2.82333	11.5867	0.13	0	0	2.62	2.43	0.78	5.27	1.76	1.44	15.75	10.33	8.68
Am_Tr_191812	1028	MCI02300.1_hypothetical protein [Trifolium medium]	.	.	0	0.02	1.62	0.22	0	0	0	0	0.06	0	1.45	1.05	2.36	0.4	0	0.26
Am_Tr_191813	632	.	.	.	0	0.0866667	0.14	0.566667	0	0	0	0	0.26	0	0.22	0	0.2	0.57	0.29	0.84
Am_Tr_191814	403	.	.	.	0.35	0	0.3	0.17	0.52	0.53	0	0	0	0	0.42	0.48	0	0.51	0	0
Am_Tr_191815	822	.	.	.	0.14	0.4	0.08	1.73	0	0.42	0	0.17	1.03	0	0	0.24	0	0.72	4.47	0
Am_Tr_191816	800	.	.	.	0.11	0.283333	0.14	0.246667	0.33	0	0	0	0.85	0	0	0.42	0	0	0	0.74
Am_Tr_191817	1006	.	.	.	0.353333	1.81	0.876667	5.26667	0	0.76	0.3	1.4	3.39	0.64	0.67	1.34	0.62	0.66	13.25	1.89
Am_Tr_191818	353	XP_045806092.1_protein OVEREXPRESSOR OF CATIONIC PEROXIDASE 3-like isoform X2 [Trifolium pratense]	AT5G11270.1_overexpressor of cationic peroxidase 3, GeneName=OCP3	.	2.00333	2.41333	2.12667	11.0167	0	6.01	0	1.02	6.22	0	0	2.01	4.37	4.62	23.61	4.82
Am_Tr_191819	983	XP_024625434.2_uncharacterized protein LOC112416305 isoform X3 [Medicago truncatula]	.	IPR025476_Helitron helicase-like domain	0	0	0.52	0	0	0	0	0	0	0	1.35	0	0.21	0	0	0
Am_Tr_191820	923	XP_031102636.1_4-coumarate--CoA ligase-like 7 isoform X1 [Ipomoea triloba] XP_031102637.1 4-coumarate--CoA ligase-like 7 isoform X1 [Ipomoea triloba] XP_031102638.1 4-coumarate--CoA ligase-like 7 isoform X1 [Ipomoea triloba]	AT4G05160.1_AMP-dependent synthetase and ligase family protein	.	0	0.313333	0.173333	0.0466667	0	0	0	0.33	0	0.61	0.26	0	0.26	0	0.14	0
Am_Tr_191821	970	XP_031102636.1_4-coumarate--CoA ligase-like 7 isoform X1 [Ipomoea triloba] XP_031102637.1 4-coumarate--CoA ligase-like 7 isoform X1 [Ipomoea triloba] XP_031102638.1 4-coumarate--CoA ligase-like 7 isoform X1 [Ipomoea triloba]	AT4G05160.1_AMP-dependent synthetase and ligase family protein	.	0.07	0.103333	0.2	0	0	0	0.21	0.31	0	0	0	0.6	0	0	0	0
Am_Tr_191822	1077	XP_031102636.1_4-coumarate--CoA ligase-like 7 isoform X1 [Ipomoea triloba] XP_031102637.1 4-coumarate--CoA ligase-like 7 isoform X1 [Ipomoea triloba] XP_031102638.1 4-coumarate--CoA ligase-like 7 isoform X1 [Ipomoea triloba]	AT4G05160.1_AMP-dependent synthetase and ligase family protein	.	0	0	0.233333	0	0	0	0	0	0	0	0.35	0	0.35	0	0	0
Am_Tr_191823	250	.	.	.	0	2.07333	0	0	0	0	0	6.22	0	0	0	0	0	0	0	0
Am_Tr_191824	258	.	.	.	1.95667	0.526667	4.02667	1.2	1.92	3.95	0	0	0	1.58	0	7.01	5.07	0	1.84	1.76
Am_Tr_191825	438	.	.	.	0.176667	0.0966667	0.06	0.286667	0.16	0	0.37	0.29	0	0	0	0	0.18	0.86	0	0
Am_Tr_191826	281	.	.	.	0	0	0	0	0	0	0	0	0	0	0	0	0	0	0	0
Am_Tr_191827	478	.	.	.	0	0	0	0.243333	0	0	0	0	0	0	0	0	0	0.73	0	0
Am_Tr_191828	1334	.	.	.	0.1	0.236667	0.23	0.943333	0.23	0	0.07	0.11	0	0.6	0.21	0	0.48	1.28	0	1.55
Am_Tr_191829	253	.	.	.	1.38667	8.25333	2.42667	12.8667	4.16	0	0	5.91	11.99	6.86	1.64	3.8	1.84	15.36	9.94	13.3
Am_Tr_191830	885	MCH94445.1_hypothetical protein [Trifolium medium]	.	.	0.27	0.2	0.256667	0.236667	0.4	0.29	0.12	0.28	0.32	0	0	0.16	0.61	0.18	0.53	0
Am_Tr_191831	378	.	.	.	0.253333	0	0.156667	0.416667	0.76	0	0	0	0	0	0	0.47	0	0.44	0.81	0
Am_Tr_191832	254	.	.	.	0	0	0	0	0	0	0	0	0	0	0	0	0	0	0	0
Am_Tr_191833	1283	.	.	.	0.543333	5.81	3.27	3.26	0.45	0.38	0.8	4.13	5.97	7.33	1.44	3.38	4.99	2.87	2.27	4.64
Am_Tr_191834	340	CDY47393.1_BnaC04g24700D [Brassica napus]	AT3G56960.1_phosphatidyl inositol monophosphate 5 kinase 4, GeneName=PIP5K4	.	0	0.29	0.87	0	0	0	0	0	0.87	0	1.26	0	1.35	0	0	0
Am_Tr_191835	469	MQL41467.1_transketolase [Escherichia coli]	AT2G45290.1_Transketolase	IPR005474_Transketolase, N-terminal; IPR029061_Thiamin diphosphate-binding fold	0.26	0.36	0.33	0.256667	0.39	0.39	0	0	0.42	0.66	0.63	0.36	0	0	0.77	0
Am_Tr_191836	332	.	.	.	0.48	2.27	1.93333	2.68	0	0	1.44	2.38	3.73	0.7	1.34	2.3	2.16	4.77	3.27	0
Am_Tr_191837	1404	KAG9143336.1_hypothetical protein Leryth_018610 [Lithospermum erythrorhizon]	AT1G24560.1_paramyosin	.	2.17333	5.04667	1.50667	4.67333	4.16	1.59	0.77	5.01	2.47	7.66	0.81	1.45	2.26	2.98	3.96	7.08
Am_Tr_191838	575	KAG9140444.1_hypothetical protein Leryth_016179 [Lithospermum erythrorhizon]	AT1G24560.1_paramyosin	.	0.216667	0.113333	0	0.146667	0	0.37	0.28	0	0	0.34	0	0	0	0	0	0.44
Am_Tr_191839	288	KAG9143336.1_hypothetical protein Leryth_018610 [Lithospermum erythrorhizon]	.	.	0	0	1.44	0.396667	0	0	0	0	0	0	2.04	1.17	1.11	0	0	1.19
Am_Tr_191840	379	.	.	.	0.2	0	0.333333	0	0.6	0	0	0	0	0	0.49	0	0.51	0	0	0
Am_Tr_191841	419	.	.	.	0.16	0.483333	0	0	0.48	0	0	0.92	0.53	0	0	0	0	0	0	0
Am_Tr_191842	230	.	.	.	0	0	0	0	0	0	0	0	0	0	0	0	0	0	0	0
Am_Tr_191843	987	RZB52867.1_putative ribonuclease H protein, partial [Glycine soja]	.	IPR026960_Reverse transcriptase zinc-binding domain	0.0333333	0	0.43	0	0	0	0.1	0	0	0	0.62	0.35	0.32	0	0	0
Am_Tr_191844	759	.	.	.	0.12	0.113333	0	0.06	0.36	0	0	0	0.19	0.15	0	0	0	0	0	0.18
Am_Tr_191845	673	.	.	.	0.213333	0.213333	0.246667	0.283333	0.21	0.43	0	0	0.46	0.18	0	0.2	0.54	0.21	0.64	0
Am_Tr_191846	222	.	.	.	0	0	0	1.23333	0	0	0	0	0	0	0	0	0	0	3.7	0
Am_Tr_191847	565	.	.	.	0	0	0.686667	0	0	0	0	0	0	0	2.06	0	0	0	0	0
Am_Tr_191848	402	.	.	.	0	0.5	1.29667	0	0	0	0	1.5	0	0	3.41	0.48	0	0	0	0
Am_Tr_191849	294	KYP58844.1_Retrovirus-related Pol polyprotein from transposon 17.6 [Cajanus cajan]	.	.	1.10667	1.21667	0.73	0.32	0	1.22	2.1	0	2.65	1	0	2.19	0	0	0	0.96
Am_Tr_191850	545	MCI13201.1_hypothetical protein [Trifolium medium]	.	IPR041577_Reverse transcriptase/retrotransposon-derived protein, RNase H-like domain; IPR043502_DNA/RNA polymerase superfamily	0.08	0.603333	0.276667	0.0966667	0	0	0.24	0	1.29	0.52	0	0.83	0	0.29	0	0
Am_Tr_191851	222	WP_207187220.1_hypothetical protein, partial [Salinicoccus roseus]	.	.	0	0	0	0	0	0	0	0	0	0	0	0	0	0	0	0
Am_Tr_191852	1591	.	.	.	0.46	0.176667	0.106667	0.07	0.42	0.28	0.68	0.27	0.08	0.18	0.06	0.26	0	0.14	0.07	0
Am_Tr_191853	3553	XP_045802371.1_B3 domain-containing transcription factor VRN1-like [Trifolium pratense]	AT4G33280.1_AP2/B3-like transcriptional factor family protein	IPR003340_B3 DNA binding domain; IPR015300_DNA-binding pseudobarrel domain superfamily	0.02	0	0.02	0.09	0	0.06	0	0	0	0	0	0.06	0	0.13	0.14	0
Am_Tr_191854	1940	XP_045802371.1_B3 domain-containing transcription factor VRN1-like [Trifolium pratense]	AT4G33280.1_AP2/B3-like transcriptional factor family protein	IPR015300_DNA-binding pseudobarrel domain superfamily; IPR003340_B3 DNA binding domain	0	0	0.0333333	0.226667	0	0	0	0	0	0	0	0.05	0.05	0.29	0.39	0
Am_Tr_191855	2577	XP_045802371.1_B3 domain-containing transcription factor VRN1-like [Trifolium pratense]	AT4G33280.1_AP2/B3-like transcriptional factor family protein	IPR003340_B3 DNA binding domain; IPR015300_DNA-binding pseudobarrel domain superfamily	0.0533333	0.153333	0.0566667	0.466667	0.16	0	0	0.28	0.18	0	0.17	0	0	0.68	0.52	0.2
Am_Tr_191856	2029	RYQ86750.1_hypothetical protein Ahy_B10g106386 [Arachis hypogaea]	.	IPR003340_B3 DNA binding domain; IPR015300_DNA-binding pseudobarrel domain superfamily	0	0	0	0.0833333	0	0	0	0	0	0	0	0	0	0.09	0	0.16
Am_Tr_191857	275	.	.	.	0	0	0	0	0	0	0	0	0	0	0	0	0	0	0	0
Am_Tr_191858	226	.	.	.	0	0	0	1.12	0	0	0	0	0	0	0	0	0	0	3.36	0
Am_Tr_191859	911	AFK37858.1_unknown [Lotus japonicus]	AT5G37850.2_pfkB-like carbohydrate kinase family protein, GeneName=SOS4	.	0.553333	0.636667	0.0233333	0.546667	1.05	0.17	0.44	0.52	0	1.39	0	0.07	0	1.02	0.07	0.55
Am_Tr_191860	1994	EYU44587.1_hypothetical protein MIMGU_mgv11b016125mg, partial [Erythranthe guttata]	AT5G37850.3_pfkB-like carbohydrate kinase family protein, GeneName=SOS4	.	0.68	0.29	0.0466667	0.576667	0.22	1.32	0.5	0.63	0.24	0	0	0	0.14	1.39	0	0.34
Am_Tr_191861	1827	GAU31110.1_hypothetical protein TSUD_212170, partial [Trifolium subterraneum]	AT5G37850.2_pfkB-like carbohydrate kinase family protein, GeneName=SOS4	.	1.30333	0.993333	0.473333	1.37	1.07	1.43	1.41	1.43	1.09	0.46	0.66	0.76	0	3.32	0.79	0
Am_Tr_191862	4405	XP_004490860.1_pyridoxal kinase isoform X2 [Cicer arietinum]	AT5G37850.1_pfkB-like carbohydrate kinase family protein, GeneName=SOS4	IPR029056_Ribokinase-like	0.326667	0	0	0.333333	0	0.39	0.59	0	0	0	0	0	0	0.64	0	0.36
Am_Tr_191863	2184	EYU44587.1_hypothetical protein MIMGU_mgv11b016125mg, partial [Erythranthe guttata]	AT5G37850.3_pfkB-like carbohydrate kinase family protein, GeneName=SOS4	.	0.206667	0.16	0	0.13	0.31	0	0.31	0.48	0	0	0	0	0	0	0.39	0
Am_Tr_191864	4129	XP_004490860.1_pyridoxal kinase isoform X2 [Cicer arietinum]	AT5G37850.1_pfkB-like carbohydrate kinase family protein, GeneName=SOS4	IPR029056_Ribokinase-like	0.146667	0.0466667	0	0	0	0.44	0	0	0.11	0.03	0	0	0	0	0	0
Am_Tr_191865	3869	XP_004490860.1_pyridoxal kinase isoform X2 [Cicer arietinum]	AT5G37850.1_pfkB-like carbohydrate kinase family protein, GeneName=SOS4	IPR029056_Ribokinase-like	0.316667	0.45	0.0233333	0.393333	0.52	0.43	0	0.41	0.86	0.08	0.07	0	0	0	1.18	0
Am_Tr_191866	1048	GAU31110.1_hypothetical protein TSUD_212170, partial [Trifolium subterraneum]	AT5G37850.2_pfkB-like carbohydrate kinase family protein, GeneName=SOS4	.	1.00667	1.65	1.26667	1.06333	0.43	1.96	0.63	1.81	1.48	1.66	1.14	1.44	1.22	1.39	0.41	1.39
Am_Tr_191867	1733	XP_004490860.1_pyridoxal kinase isoform X2 [Cicer arietinum]	AT5G37850.1_pfkB-like carbohydrate kinase family protein, GeneName=SOS4	IPR013749_Pyridoxamine kinase/Phosphomethylpyrimidine kinase; IPR004625_Pyridoxine kinase; IPR029056_Ribokinase-like	23.58	23.4533	18.8867	21.75	9.07	35.22	26.45	21.26	20.7	28.4	17.45	18.21	21	21.32	20.49	23.44
Am_Tr_191868	4192	AFK42134.1_unknown [Medicago truncatula]	AT5G37850.1_pfkB-like carbohydrate kinase family protein, GeneName=SOS4	IPR029056_Ribokinase-like	0.0433333	0.0633333	0	0.19	0	0	0.13	0	0	0.19	0	0	0	0.5	0	0.07
Am_Tr_191869	1928	XP_004490860.1_pyridoxal kinase isoform X2 [Cicer arietinum]	AT5G37850.1_pfkB-like carbohydrate kinase family protein, GeneName=SOS4	IPR029056_Ribokinase-like; IPR013749_Pyridoxamine kinase/Phosphomethylpyrimidine kinase; IPR004625_Pyridoxine kinase	1.27	0.27	0.06	0.413333	0.37	1.78	1.66	0.57	0.24	0	0.18	0	0	1.24	0	0
Am_Tr_191870	1456	KAA8530639.1_hypothetical protein F0562_005427 [Nyssa sinensis]	AT5G37850.2_pfkB-like carbohydrate kinase family protein, GeneName=SOS4	.	1.54667	0.483333	0.523333	0.136667	0.7	1.77	2.17	0.81	0.2	0.44	0.12	0.78	0.67	0	0	0.41
Am_Tr_191871	772	AFK42134.1_unknown [Medicago truncatula]	AT5G37850.2_pfkB-like carbohydrate kinase family protein, GeneName=SOS4	.	0.816667	0.0833333	0.226667	0	0.43	0.39	1.63	0	0.25	0	0	0.29	0.39	0	0	0
Am_Tr_191872	4324	XP_004490860.1_pyridoxal kinase isoform X2 [Cicer arietinum]	AT5G37850.1_pfkB-like carbohydrate kinase family protein, GeneName=SOS4	IPR029056_Ribokinase-like	0.24	0.04	0.0533333	0.35	0	0.19	0.53	0	0	0.12	0	0	0.16	1.05	0	0
Am_Tr_191873	4064	XP_004490860.1_pyridoxal kinase isoform X2 [Cicer arietinum]	AT5G37850.1_pfkB-like carbohydrate kinase family protein, GeneName=SOS4	IPR029056_Ribokinase-like	0.553333	0.05	0.436667	0.0866667	0.24	0.57	0.85	0	0	0.15	0.08	0.84	0.39	0.26	0	0
Am_Tr_191874	954	AFK42134.1_unknown [Medicago truncatula]	AT5G37850.2_pfkB-like carbohydrate kinase family protein, GeneName=SOS4	.	0.663333	0.273333	0.1	0.613333	0.18	0.95	0.86	0	0.82	0	0	0	0.3	1.44	0	0.4
Am_Tr_191875	834	OVA14537.1_Pyridoxal phosphate (active vitamin B6) biosynthesis [Macleaya cordata]	AT5G37850.1_pfkB-like carbohydrate kinase family protein, GeneName=SOS4	.	0.35	0.0633333	0.0566667	0	1.05	0	0	0.19	0	0	0	0	0.17	0	0	0
Am_Tr_191876	4145	XP_004490860.1_pyridoxal kinase isoform X2 [Cicer arietinum]	AT5G37850.1_pfkB-like carbohydrate kinase family protein, GeneName=SOS4	IPR029056_Ribokinase-like	0.556667	0.136667	0	0.103333	0	0.63	1.04	0.41	0	0	0	0	0	0.14	0	0.17
Am_Tr_191877	362	.	.	.	0.19	0	0.746667	0.433333	0	0	0.57	0	0	0	1.62	0.62	0	0	0.66	0.64
Am_Tr_191878	348	.	.	.	0.246667	0	0	0.233333	0.74	0	0	0	0	0	0	0	0	0	0	0.7
Am_Tr_191879	246	.	.	.	0	0	0	0	0	0	0	0	0	0	0	0	0	0	0	0
Am_Tr_191880	418	.	.	.	0	0.176667	0	0	0	0	0	0	0.53	0	0	0	0	0	0	0
Am_Tr_191881	262	.	.	.	0	0	1.60667	0	0	0	0	0	0	0	0	1.65	3.17	0	0	0
Am_Tr_191882	924	.	.	.	0	0.37	0	0.273333	0	0	0	0	0.4	0.71	0	0	0	0	0.41	0.41
Am_Tr_191883	901	.	.	.	0.0466667	0.07	0.123333	0	0	0.14	0	0	0.21	0	0	0.13	0.24	0	0	0
Am_Tr_191884	271	.	.	.	0.476667	0	0.463333	0	0	0	1.43	0	0	0	0	1.39	0	0	0	0
Am_Tr_191885	635	PNX65969.1_hypothetical protein L195_g054813, partial [Trifolium pratense]	.	.	0.253333	0	0.516667	0	0.76	0	0	0	0	0	0.57	0	0.98	0	0	0
Am_Tr_191886	493	PNX65969.1_hypothetical protein L195_g054813, partial [Trifolium pratense]	.	.	1.00667	0.113333	0.743333	0.46	2.02	0.71	0.29	0.34	0	0	0	1.63	0.6	0.69	0	0.69
Am_Tr_191887	213	.	.	.	0	0	0	0	0	0	0	0	0	0	0	0	0	0	0	0
Am_Tr_191888	398	.	.	.	0	0	0.166667	0	0	0	0	0	0	0	0	0.5	0	0	0	0
Am_Tr_191889	375	.	.	.	0.583333	0	0	0.803333	0.61	0.62	0.52	0	0	0	0	0	0	0.59	1.82	0
Am_Tr_191890	258	.	.	.	0.586667	0	0.506667	0	0	0	1.76	0	0	0	1.52	0	0	0	0	0
Am_Tr_191891	249	.	.	.	2.12667	0	0	0	2.23	0	4.15	0	0	0	0	0	0	0	0	0
Am_Tr_191892	381	.	.	.	0.363333	0.436667	0.17	0.19	0.59	0	0.5	0	1.31	0	0	0	0.51	0.57	0	0
Am_Tr_191893	312	PNY07559.1_hypothetical protein L195_g004059 [Trifolium pratense]	.	.	0	2.18333	0.286667	0	0	0	0	3.77	1.12	1.66	0	0	0.86	0	0	0
Am_Tr_191894	794	RDX63710.1_Copia protein, partial [Mucuna pruriens]	.	.	0.203333	0.0533333	0	0.0566667	0.17	0.17	0.27	0.16	0	0	0	0	0	0	0	0.17
Am_Tr_191895	417	TMW57604.1_hypothetical protein Poli38472_003529 [Pythium oligandrum]	AT1G74310.2_heat shock protein 101, GeneName=HSP101	IPR001270_ClpA/B family; IPR003959_ATPase, AAA-type, core; IPR027417_P-loop containing nucleoside triphosphate hydrolase	0.27	0	0	0	0	0	0.81	0	0	0	0	0	0	0	0	0
Am_Tr_191896	263	AEY83985.1_heat shock protein 101 KDa, partial [Triticum aestivum] AEY83986.1 heat shock protein 101 KDa, partial [Triticum aestivum]	AT1G74310.2_heat shock protein 101, GeneName=HSP101	.	1.22	0	0	0	0	3.66	0	0	0	0	0	0	0	0	0	0
Am_Tr_191897	299	.	.	.	0.376667	0.356667	0.626667	0	1.13	0	0	1.07	0	0	0.9	0	0.98	0	0	0
Am_Tr_191898	256	PNX60131.1_G-type lectin S-receptor-like serine/threonine-kinase, partial [Trifolium pratense]	AT1G11330.3_S-locus lectin protein kinase family protein	.	0	0.76	1.76667	0.633333	0	0	0	0	2.28	0	0	1.81	3.49	0	1.9	0
Am_Tr_191899	311	.	.	.	1.36333	0	0.29	0	0	4.09	0	0	0	0	0	0	0.87	0	0	0
Am_Tr_191900	1111	XP_046125779.1_uncharacterized protein B0J15DRAFT_503810 [Fusarium solani] KAH7237413.1 hypothetical protein B0J15DRAFT_503810 [Fusarium solani]	.	.	1.69333	0	0	0	0.32	0.76	4	0	0	0	0	0	0	0	0	0
Am_Tr_191901	1045	XP_022467825.1_Snf7 family protein [Colletotrichum orchidophilum] XP_035333068.1 Snf7 family protein [Colletotrichum scovillei] EXF77549.1 Snf7 family protein [Colletotrichum fioriniae PJ7] KXH31154.1 Snf7 family protein [Colletotrichum nymphaeae SA-01] KAF4780065.1 Snf7 family protein [Colletotrichum scovillei] KAG7058036.1 Snf7 family protein [Colletotrichum scovillei] KAG7076668.1 Snf7 family …	.	IPR005024_Snf7 family	0	0	0.816667	0.04	0	0	0	0	0	0	1.74	0.22	0.49	0.12	0	0
Am_Tr_191902	668	MCH84449.1_pentatricopeptide repeat-containing protein [Trifolium medium]	.	.	0.13	0.14	0	0.213333	0.22	0	0.17	0	0.23	0.19	0	0	0	0	0	0.64
Am_Tr_191903	811	XP_004502039.1_pentatricopeptide repeat-containing protein At1g74630-like [Cicer arietinum]	.	.	0.163333	0.113333	0	0.16	0	0.49	0	0.16	0.18	0	0	0	0	0.32	0.16	0
Am_Tr_191904	805	.	.	.	0	0	0	0	0	0	0	0	0	0	0	0	0	0	0	0
Am_Tr_191905	1057	.	.	.	0	0	0	0	0	0	0	0	0	0	0	0	0	0	0	0
Am_Tr_191906	875	.	.	.	0	0	0	0	0	0	0	0	0	0	0	0	0	0	0	0
Am_Tr_191907	293	.	.	.	0	0	0	0.39	0	0	0	0	0	0	0	0	0	0	1.17	0
Am_Tr_191908	384	.	.	.	0.39	0.183333	0	0	0.58	0.59	0	0.55	0	0	0	0	0	0	0	0
Am_Tr_191909	286	.	.	.	1.33	0	0	0	1.31	2.68	0	0	0	0	0	0	0	0	0	0
Am_Tr_191910	286	.	.	.	0	2.08	0	0	0	0	0	0	2.97	3.27	0	0	0	0	0	0
Am_Tr_191911	495	.	.	.	0.713333	0.593333	1.14667	0.23	0.7	0	1.44	0.33	1.15	0.3	0	1.95	1.49	0.34	0.35	0
Am_Tr_191912	655	MCI02166.1_hypothetical protein [Trifolium medium]	.	.	0.206667	0.426667	0	0.146667	0.22	0.22	0.18	0.42	0.48	0.38	0	0	0	0	0.22	0.22
Am_Tr_191913	241	.	.	.	0	0	0	0	0	0	0	0	0	0	0	0	0	0	0	0
Am_Tr_191914	379	PNX88580.1_hypothetical protein L195_g044686, partial [Trifolium pratense]	.	IPR005162_Retrotransposon gag domain	0	0	0.17	0.386667	0	0	0	0	0	0	0	0	0.51	1.16	0	0
Am_Tr_191915	255	.	.	.	0	0	0	0	0	0	0	0	0	0	0	0	0	0	0	0
Am_Tr_191916	510	XP_045807456.1_ubiquitin receptor RAD23c isoform X1 [Trifolium pratense]	AT3G02540.3_Rad23 UV excision repair protein family, GeneName=RAD23C	.	0	0	0.34	0.31	0	0	0	0	0	0	0	0	1.02	0.93	0	0
Am_Tr_191917	423	XP_045807456.1_ubiquitin receptor RAD23c isoform X1 [Trifolium pratense]	AT3G02540.3_Rad23 UV excision repair protein family, GeneName=RAD23C	.	1.65333	0.836667	1.14333	1.54333	2.83	0.95	1.18	0.9	0	1.61	1.15	1.31	0.97	2.34	0	2.29
Am_Tr_191918	1588	KAF1318561.1_Sucrose transport protein sut1, partial [Globisporangium splendens]	.	IPR036259_MFS transporter superfamily	0.586667	0	0	0	0	0	1.76	0	0	0	0	0	0	0	0	0
Am_Tr_191919	1553	KAF1318561.1_Sucrose transport protein sut1, partial [Globisporangium splendens]	.	IPR036259_MFS transporter superfamily	0.536667	0	0	0	0	0	1.61	0	0	0	0	0	0	0	0	0
Am_Tr_191920	321	.	.	.	0	0	0.56	0.59	0	0	0	0	0	0	0	1.68	0	0.87	0.9	0
Am_Tr_191921	369	.	.	.	0	0	0.363333	0	0	0	0	0	0	0	0	0	1.09	0	0	0
Am_Tr_191922	359	.	.	.	0	0	0.21	0	0	0	0	0	0	0	0	0.63	0	0	0	0
Am_Tr_191923	261	.	.	.	0.56	1.08	0	0	0	0	1.68	1.73	0	1.51	0	0	0	0	0	0
Am_Tr_191924	615	.	.	.	0	1.73	3.59	0	0	0	0	1.63	2.13	1.43	6.93	1.36	2.48	0	0	0
Am_Tr_191925	544	.	.	.	0	0.266667	0.193333	0.0966667	0	0	0	0	0	0.8	0.58	0	0	0.29	0	0
Am_Tr_191926	1184	MCI02166.1_hypothetical protein [Trifolium medium]	.	.	0.0533333	0.216667	0	0.0666667	0	0	0.16	0.19	0.11	0.35	0	0	0	0	0.2	0
Am_Tr_191927	722	MCI02166.1_hypothetical protein [Trifolium medium]	.	IPR005162_Retrotransposon gag domain	0.0633333	0	0.0533333	0.0633333	0.19	0	0	0	0	0	0	0	0.16	0.19	0	0
Am_Tr_191928	206	.	.	.	0	0	0	1.84	0	0	0	0	0	0	0	0	0	5.52	0	0
Am_Tr_191929	1393	GAU50942.1_hypothetical protein TSUD_411380, partial [Trifolium subterraneum]	.	IPR005162_Retrotransposon gag domain	0	1.73	0.0966667	0.216667	0	0	0	1.34	1.07	2.78	0.14	0.08	0.07	0.24	0.25	0.16
Am_Tr_191930	264	.	.	.	2.15333	4.65667	1	2.23	0	6.46	0	3.6	6.01	4.36	1.39	1.61	0	1.63	5.06	0
Am_Tr_191931	229	.	.	.	0	0.903333	0	3.05333	0	0	0	0	0	2.71	0	0	0	6.02	3.14	0
Am_Tr_191932	274	.	.	.	0	0	0	0.49	0	0	0	0	0	0	0	0	0	0	1.47	0
Am_Tr_191933	478	ORX93844.1_hypothetical protein K493DRAFT_262004 [Basidiobolus meristosporus CBS 931.73]	AT1G74060.1_Ribosomal protein L6 family protein	IPR000915_60S ribosomal protein L6E; IPR008991_Translation protein SH3-like domain superfamily	0	0	0	0	0	0	0	0	0	0	0	0	0	0	0	0
Am_Tr_191934	729	TMW62374.1_hypothetical protein Poli38472_009867 [Pythium oligandrum]	.	IPR012493_Renin receptor-like	0.51	0	0	0	0	0	1.53	0	0	0	0	0	0	0	0	0
Am_Tr_191935	521	.	.	.	0.126667	0.116667	0.09	0.106667	0	0	0.38	0	0	0.35	0	0	0.27	0	0.32	0
Am_Tr_191936	1488	PNX76538.1_hypothetical protein L195_g032490, partial [Trifolium pratense]	.	IPR012337_Ribonuclease H-like superfamily; IPR041588_Integrase zinc-binding domain	0	0	0.02	0.03	0	0	0	0	0	0	0	0	0.06	0	0.09	0
Am_Tr_191937	1775	PNX76538.1_hypothetical protein L195_g032490, partial [Trifolium pratense]	.	IPR012337_Ribonuclease H-like superfamily; IPR041588_Integrase zinc-binding domain	0.0433333	0.196667	0.0566667	0.126667	0	0	0.13	0.12	0.27	0.2	0	0.17	0	0.12	0.14	0.12
Am_Tr_191938	275	MCH96155.1_hypothetical protein [Trifolium medium]	.	.	0	0	0	0	0	0	0	0	0	0	0	0	0	0	0	0
Am_Tr_191939	723	ACN33260.1_unknown [Zea mays]	AT3G61650.1_gamma-tubulin, GeneName=TUBG1	.	0.323333	0	0	0	0.19	0	0.78	0	0	0	0	0	0	0	0	0
Am_Tr_191940	275	.	.	.	0	0.99	0	0	0	0	0	0	1.72	1.25	0	0	0	0	0	0
Am_Tr_191941	323	.	.	.	0	0.976667	0.24	0	0	0	0	0.85	1.73	0.35	0.72	0	0	0	0	0
Am_Tr_191942	1401	.	.	.	0.0266667	0.316667	0.356667	0.19	0	0.08	0	0.16	0.47	0.32	0.2	0.53	0.34	0.4	0.17	0
Am_Tr_191943	640	MCH79981.1_hypothetical protein [Trifolium medium]	.	IPR012337_Ribonuclease H-like superfamily	0	0.0733333	0.0633333	0.0766667	0	0	0	0.22	0	0	0.19	0	0	0.23	0	0
Am_Tr_191944	2538	PNX76538.1_hypothetical protein L195_g032490, partial [Trifolium pratense]	ATMG00860.1_DNA/RNA polymerases superfamily protein, GeneName=ORF158	IPR012337_Ribonuclease H-like superfamily; IPR041373_Reverse transcriptase, RNase H-like domain; IPR041588_Integrase zinc-binding domain; IPR016197_Chromo-like domain superfamily; IPR043502_DNA/RNA polymerase superfamily	0.106667	0.236667	0.05	0.11	0.12	0	0.2	0.28	0.18	0.25	0.03	0.08	0.04	0.12	0.04	0.17
Am_Tr_191945	299	MCI12082.1_enzymatic polyprotein [Trifolium medium]	.	IPR043502_DNA/RNA polymerase superfamily; IPR041373_Reverse transcriptase, RNase H-like domain	0	0.356667	0	0.353333	0	0	0	1.07	0	0	0	0	0	0	0	1.06
Am_Tr_191946	216	PNX76538.1_hypothetical protein L195_g032490, partial [Trifolium pratense]	.	.	0	0	0	0	0	0	0	0	0	0	0	0	0	0	0	0
Am_Tr_191947	252	BAG72152.1_hypothetical protein [Lotus japonicus]	.	.	0	0	0	0	0	0	0	0	0	0	0	0	0	0	0	0
Am_Tr_191948	205	MCH96155.1_hypothetical protein [Trifolium medium]	.	.	0	0	0	2.00333	0	0	0	0	0	0	0	0	0	0	6.01	0
Am_Tr_191949	240	.	.	.	0	0.83	0.78	0	0	0	0	2.49	0	0	0	0	2.34	0	0	0
Am_Tr_191950	231	.	.	.	3.06	0	0	0	0	0	9.18	0	0	0	0	0	0	0	0	0
Am_Tr_191951	562	PNX69125.1_putative copia-type protein, partial [Trifolium pratense]	.	.	0.0933333	0.466667	0.08	0.376667	0	0.28	0	0	0.92	0.48	0	0	0.24	0	0.85	0.28
Am_Tr_191952	348	.	.	.	0.67	0.206667	0	0.236667	0	0.75	1.26	0	0	0.62	0	0	0	0.71	0	0
Am_Tr_191953	225	KXH31912.1_hypothetical protein CSIM01_02464 [Colletotrichum simmondsii]	.	.	0	0	1.09333	0	0	0	0	0	0	0	0	0	3.28	0	0	0
Am_Tr_191954	315	.	.	.	0.326667	0.94	0.59	0	0	0.98	0	0.92	1.09	0.81	0	1.77	0	0	0	0
Am_Tr_191955	493	.	.	.	0.213333	0	0.106667	0	0	0	0.64	0	0	0	0.32	0	0	0	0	0
Am_Tr_191956	345	.	.	.	0.753333	0	0	0	2.26	0	0	0	0	0	0	0	0	0	0	0
Am_Tr_191957	447	.	.	.	0	0	0.59	0	0	0	0	0	0	0	1.38	0.39	0	0	0	0
Am_Tr_191958	229	XP_030446349.1_alpha-L-arabinofuranosidase 1-like [Syzygium oleosum]	AT3G10740.1_alpha-L-arabinofuranosidase 1, GeneName=ASD1	.	0	0	1.01333	0	0	0	0	0	0	0	0	3.04	0	0	0	0
Am_Tr_191959	415	.	.	.	0	0.476667	0	0	0	0	0	0.47	0.54	0.42	0	0	0	0	0	0
Am_Tr_191960	216	KAG5060675.1_hypothetical protein JHK87_001704 [Glycine soja]	AT5G65830.1_receptor like protein 57, GeneName=RLP57	.	1.55667	0	2.81	0	4.67	0	0	0	0	0	0	8.43	0	0	0	0
Am_Tr_191961	399	GEU47587.1_annexin D5-like [Tanacetum cinerariifolium]	AT1G68090.1_annexin 5, GeneName=ANN5	.	0.3	0	0	0	0	0	0.9	0	0	0	0	0	0	0	0	0
Am_Tr_191962	322	XP_004513341.1_annexin D5-like [Cicer arietinum]	AT1G68090.1_annexin 5, GeneName=ANN5	.	0.523333	0	0	0	0	0	1.57	0	0	0	0	0	0	0	0	0
Am_Tr_191963	245	XP_004513341.1_annexin D5-like [Cicer arietinum]	AT1G68090.1_annexin 5, GeneName=ANN5	.	1.57667	0	0	0	0	2.48	2.25	0	0	0	0	0	0	0	0	0
Am_Tr_191964	552	.	.	.	0	0.516667	0.09	0.186667	0	0	0	0.28	1.27	0	0	0.27	0	0.28	0	0.28
Am_Tr_191965	236	WP_130855951.1_MULTISPECIES: OBAP family protein [Olivibacter] QEL02227.1 DUF1264 domain-containing protein [Olivibacter sp. LS-1]	AT5G45690.1_histone acetyltransferase (DUF1264)	.	0	0	0	0.866667	0	0	0	0	0	0	0	0	0	2.6	0	0
Am_Tr_191966	287	KIP09597.1_hypothetical protein PHLGIDRAFT_34358 [Phlebiopsis gigantea 11061_1 CR5-6]	AT1G05510.1_naphthalene 1,2-dioxygenase subunit alpha (DUF1264)	.	0	0	0	0	0	0	0	0	0	0	0	0	0	0	0	0
Am_Tr_191967	242	.	.	.	0	0	0	0.773333	0	0	0	0	0	0	0	0	0	2.32	0	0
Am_Tr_191968	648	WP_027212741.1_OBAP family protein [Burkholderia sp. WSM2232]	AT1G05510.1_naphthalene 1,2-dioxygenase subunit alpha (DUF1264)	IPR010686_Oil body-associated protein-like	0	0.0633333	0	0.666667	0	0	0	0	0	0.19	0	0	0	1.77	0.23	0
Am_Tr_191969	312	KAH7914968.1_hypothetical protein BJ138DRAFT_1142674 [Hygrophoropsis aurantiaca]	.	IPR010686_Oil body-associated protein-like	0	0	0	0.63	0	0	0	0	0	0	0	0	0	1.89	0	0
Am_Tr_191970	223	RIK89516.1_DUF1264 domain-containing protein [Proteobacteria bacterium]	AT5G45690.1_histone acetyltransferase (DUF1264)	.	0	0	0	1.15	0	0	0	0	0	0	0	0	0	3.45	0	0
Am_Tr_191971	391	ACU17947.1_unknown [Glycine max] KAH1160749.1 hypothetical protein GYH30_032159 [Glycine max] KRH31471.1 hypothetical protein GLYMA_11G249800v4 [Glycine max]	AT1G67400.1_ELMO/CED-12 family protein	.	0	0	0.473333	0	0	0	0	0	0	0	0	1.42	0	0	0	0
Am_Tr_191972	1766	ACU17947.1_unknown [Glycine max] KAH1160749.1 hypothetical protein GYH30_032159 [Glycine max] KRH31471.1 hypothetical protein GLYMA_11G249800v4 [Glycine max]	AT1G67400.1_ELMO/CED-12 family protein	.	0	0	0.103333	0	0	0	0	0	0	0	0.1	0.21	0	0	0	0
Am_Tr_191973	1207	XP_027336261.1_ELMO domain-containing protein A isoform X1 [Abrus precatorius]	AT1G67400.1_ELMO/CED-12 family protein	IPR006816_ELMO domain	0	0.28	0.0466667	0	0	0	0	0.84	0	0	0.14	0	0	0	0	0
Am_Tr_191974	1647	XP_027336261.1_ELMO domain-containing protein A isoform X1 [Abrus precatorius]	AT1G67400.1_ELMO/CED-12 family protein	IPR006816_ELMO domain	0	0.05	0.93	0	0	0	0	0	0	0.15	1.27	1.25	0.27	0	0	0
Am_Tr_191975	1617	TKY47759.1_ELMO domain-containing protein A [Spatholobus suberectus]	AT1G67400.1_ELMO/CED-12 family protein	.	0	0.216667	0	0	0	0	0	0.53	0.12	0	0	0	0	0	0	0
Am_Tr_191976	1336	XP_027336261.1_ELMO domain-containing protein A isoform X1 [Abrus precatorius]	AT1G67400.1_ELMO/CED-12 family protein	IPR006816_ELMO domain	0	0.1	0.253333	0.06	0	0	0	0	0.2	0.1	0.3	0	0.46	0	0.18	0
Am_Tr_191977	1410	XP_027336261.1_ELMO domain-containing protein A isoform X1 [Abrus precatorius]	AT1G67400.1_ELMO/CED-12 family protein	IPR006816_ELMO domain	0	0	3.14333	0.23	0	0	0	0	0	0	2.31	2.56	4.56	0.32	0.16	0.21
Am_Tr_191978	988	TKY47759.1_ELMO domain-containing protein A [Spatholobus suberectus]	AT1G67400.1_ELMO/CED-12 family protein	IPR006816_ELMO domain	0	0.32	3.81	0.0566667	0	0	0	0	0.72	0.24	7.45	2.59	1.39	0	0	0.17
Am_Tr_191979	242	.	.	.	0	0	1.54333	0	0	0	0	0	0	0	0	4.63	0	0	0	0
Am_Tr_191980	1123	XP_034250414.1_synaptosomal-associated protein 25 isoform X3 [Thrips palmi]	.	IPR000727_Target SNARE coiled-coil homology domain; IPR000928_SNAP-25 domain	0	0	0.713333	0	0	0	0	0	0	0	1.85	0.2	0.09	0	0	0
Am_Tr_191981	397	.	.	.	0	0	0.306667	0	0	0	0	0	0	0	0	0	0.92	0	0	0
Am_Tr_191982	403	KYP73612.1_Retrovirus-related Pol polyprotein from transposon TNT 1-94, partial [Cajanus cajan]	AT4G23160.3_cysteine-rich RECEPTOR-like kinase, GeneName=CRK8	.	0	0.533333	0.16	0	0	0	0	0	1.16	0.44	0	0.48	0	0	0	0
Am_Tr_191983	584	KYP51671.1_Retrovirus-related Pol polyprotein from transposon TNT 1-94 [Cajanus cajan]	AT4G23160.3_cysteine-rich RECEPTOR-like kinase, GeneName=CRK8	IPR013103_Reverse transcriptase, RNA-dependent DNA polymerase; IPR043502_DNA/RNA polymerase superfamily	0.516667	0.32	0.0833333	0.0866667	0.53	0.8	0.22	0.51	0	0.45	0	0.25	0	0	0	0.26
Am_Tr_191984	606	KYP54944.1_Retrovirus-related Pol polyprotein from transposon TNT 1-94 [Cajanus cajan]	AT4G23160.3_cysteine-rich RECEPTOR-like kinase, GeneName=CRK8	IPR013103_Reverse transcriptase, RNA-dependent DNA polymerase; IPR043502_DNA/RNA polymerase superfamily	0.233333	0.07	0	0	0.5	0	0.2	0	0	0.21	0	0	0	0	0	0
Am_Tr_191985	708	KYP54944.1_Retrovirus-related Pol polyprotein from transposon TNT 1-94 [Cajanus cajan]	AT4G23160.3_cysteine-rich RECEPTOR-like kinase, GeneName=CRK8	IPR043502_DNA/RNA polymerase superfamily; IPR013103_Reverse transcriptase, RNA-dependent DNA polymerase	0.423333	0.273333	0.416667	0.13	0.2	0.59	0.48	0	0.65	0.17	0.16	0.92	0.17	0.19	0.2	0
Am_Tr_191986	974	PNX77125.1_retrovirus-related Pol polyprotein from transposon TNT 1-94 [Trifolium pratense]	AT4G23160.3_cysteine-rich RECEPTOR-like kinase, GeneName=CRK8	IPR013103_Reverse transcriptase, RNA-dependent DNA polymerase; IPR043502_DNA/RNA polymerase superfamily	0.37	2.39667	1.88	0.976667	0.13	0.77	0.21	1.96	2.36	2.87	0.84	2.75	2.05	0.88	1.16	0.89
Am_Tr_191987	516	.	.	.	0.11	0	0.1	0	0	0.33	0	0	0	0	0	0.3	0	0	0	0
Am_Tr_191988	273	.	.	.	0	0	0	0	0	0	0	0	0	0	0	0	0	0	0	0
Am_Tr_191989	343	KDN48059.1_hypothetical protein RSAG8_03075, partial [Rhizoctonia solani AG-8 WAC10335]	AT5G19780.1_tubulin alpha-5, GeneName=TUA5	IPR002452_Alpha tubulin; IPR008280_Tubulin/FtsZ, C-terminal; IPR018316_Tubulin/FtsZ, 2-layer sandwich domain	0	0	0	0.97	0	0	0	0	0	0	0	0	0	0	0	2.91
Am_Tr_191990	870	KEH30987.1_homeobox domain protein [Medicago truncatula]	AT1G28420.1_homeobox-1, GeneName=HB-1	.	0.05	0	0.04	0.05	0	0.15	0	0	0	0	0.12	0	0	0	0	0.15
Am_Tr_191991	599	.	.	.	0.0833333	0	0	0.0866667	0	0.25	0	0	0	0	0	0	0	0	0.26	0
Am_Tr_191992	814	.	.	.	0	0	0.366667	0	0	0	0	0	0	0	0.8	0.3	0	0	0	0
Am_Tr_191993	547	.	.	.	0.1	0.7	0	0	0	0.3	0	1.13	0.97	0	0	0	0	0	0	0
[truncated: 208,155+ more rows]
