# Supplementary material for: Enhancing transcriptome analysis in medicinal plants: multiple unigene sets in Astragalus membranaceus
Source: Front Plant Sci. 2024 Feb 7;15:1301526. doi: 10.3389/fpls.2024.1301526 (PMC10879423; doi:10.3389/fpls.2024.1301526)
Supplement: Supplementary file 8 [file Table_7.xlsx]

## Sheet: Table S7
Supplementary Table 7. Number and expression values of phenylpropanoid-related unigenes selected by TPM filtering (TPM ≥ 1).
Flatform	Unigene number	Unigene ID	Unigene length	Annotation description			Gene name	Average TPM				Roots			Leaves			Flowers			Stems
				NR blast	Araport11	InterPro		Roots	Leaves	Flowers	Stems	R1	R2	R3	L1	L2	L3	F1	F2	F3	S1	S2	S3
Iso-seq	9	Am_HQ_15428	2930	AID51445.1_phenylalanine ammonia-lyase 2 [Astragalus membranaceus]	AT2G37040.1_PHE ammonia lyase 1, GeneName=PAL1	IPR008948_L-Aspartase-like; IPR005922_Phenylalanine ammonia-lyase; IPR001106_Aromatic amino acid lyase	PAL	11.7833	18.2467	10.7267	24.11	16.77	16.39	2.19	31.95	18.98	3.81	13.97	15.3	2.91	40.33	29.28	2.72
		Am_HQ_15739	2995	AID51446.1_phenylalanine ammonia-lyase 3 [Astragalus membranaceus]	AT2G37040.1_PHE ammonia lyase 1, GeneName=PAL1	IPR005922_Phenylalanine ammonia-lyase; IPR001106_Aromatic amino acid lyase; IPR008948_L-Aspartase-like	PAL	7.95667	5.03667	7.57667	8.66667	6.21	16.72	0.94	2.81	8.8	3.5	11.57	6.79	4.37	15.01	6.76	4.23
		Am_HQ_23823	2675	QDG03197.1_phenylalanine ammonia-lyase [Glycyrrhiza uralensis]	AT3G53260.1_phenylalanine ammonia-lyase 2, GeneName=PAL2	IPR008948_L-Aspartase-like; IPR001106_Aromatic amino acid lyase; IPR005922_Phenylalanine ammonia-lyase	PAL	19.8567	29.9567	102.197	59.7267	10.45	28.75	20.37	29.51	34.01	26.35	83.21	95.1	128.28	60.69	75.95	42.54
		Am_HQ_24424	2667	ATY39966.1_Phenylalanine ammonia lyase 1 [Astragalus membranaceus]	AT2G37040.1_PHE ammonia lyase 1, GeneName=PAL1	IPR001106_Aromatic amino acid lyase; IPR005922_Phenylalanine ammonia-lyase; IPR008948_L-Aspartase-like	PAL	336.82	159.613	191.427	155.383	538.14	274.18	198.14	163.92	149.86	165.06	107.26	204.06	262.96	161	185.1	120.05
		Am_HQ_28347	2567	ATY39968.1_Phenylalanine ammonia lyase 3 [Astragalus membranaceus]	AT2G37040.1_PHE ammonia lyase 1, GeneName=PAL1	IPR005922_Phenylalanine ammonia-lyase; IPR001106_Aromatic amino acid lyase; IPR008948_L-Aspartase-like	PAL	32.7167	67.28	33.9833	78.7933	37.62	33.93	26.6	35.4	97.06	69.38	16.35	36.06	49.54	57.47	116.55	62.36
		Am_HQ_29880	2499	AID51445.1_phenylalanine ammonia-lyase 2 [Astragalus membranaceus]	AT2G37040.1_PHE ammonia lyase 1, GeneName=PAL1	IPR001106_Aromatic amino acid lyase; IPR008948_L-Aspartase-like; IPR005922_Phenylalanine ammonia-lyase	PAL	50.0467	113.613	81.7367	137.967	22.99	66.74	60.41	46.33	119.96	174.55	36.96	77.85	130.4	86.08	151.44	176.38
		Am_HQ_34937	2367	AID51446.1_phenylalanine ammonia-lyase 3 [Astragalus membranaceus]	AT2G37040.1_PHE ammonia lyase 1, GeneName=PAL1	IPR001106_Aromatic amino acid lyase; IPR008948_L-Aspartase-like; IPR005922_Phenylalanine ammonia-lyase	PAL	16.96	17.6767	24.5533	21.9667	4.6	38.08	8.2	2.69	20.1	30.24	7.53	18.21	47.92	12.33	20.28	33.29
		Am_HQ_43935	2151	PNY01052.1_phenylalanine amonnia lyase [Trifolium pratense]	AT3G53260.1_phenylalanine ammonia-lyase 2, GeneName=PAL2	IPR001106_Aromatic amino acid lyase; IPR008948_L-Aspartase-like	PAL	0.11	0.826667	1.58	1.52	0.14	0.13	0.06	0.88	0.61	0.99	0.92	0.77	3.05	1.34	0.75	2.47
		Am_HQ_53614	1946	XP_004493977.1_phenylalanine ammonia-lyase 1 [Cicer arietinum]	AT2G37040.1_PHE ammonia lyase 1, GeneName=PAL1	IPR001106_Aromatic amino acid lyase; IPR008948_L-Aspartase-like; IPR005922_Phenylalanine ammonia-lyase	PAL	0.253333	0.556667	1.1	0.97	0.06	0.3	0.4	0.06	0.55	1.06	0.13	0.7	2.47	0	0.32	2.59
rnaSPAdes	16	Am_Rn_003326	5928	NP_001266106.1_phenylalanine ammonia-lyase 2 [Cicer arietinum] XP_027188920.1 phenylalanine ammonia-lyase 2 isoform X1 [Cicer arietinum] Q9SMK9.1 RecName: Full=Phenylalanine ammonia-lyase 2 [Cicer arietinum] CAB60719.1 phenylalanine ammonia-lyase [Cicer arietinum]	AT2G37040.1_PHE ammonia lyase 1, GeneName=PAL1	IPR001106_Aromatic amino acid lyase; IPR008948_L-Aspartase-like; IPR005922_Phenylalanine ammonia-lyase	PAL	0.13	0.996667	2.31	1.78333	0.13	0.19	0.07	0.86	1.03	1.1	1.13	2.09	3.71	1.38	1.45	2.52
		Am_Rn_005598	5169	ATY39966.1_Phenylalanine ammonia lyase 1 [Astragalus membranaceus]	AT2G37040.1_PHE ammonia lyase 1, GeneName=PAL1	IPR008948_L-Aspartase-like; IPR001106_Aromatic amino acid lyase	PAL	1.94	0.996667	0.993333	0.76	3.36	1.96	0.5	1.78	0.48	0.73	1.87	0.35	0.76	0.2	1.66	0.42
		Am_Rn_006095	5037	ATY39966.1_Phenylalanine ammonia lyase 1 [Astragalus membranaceus]	AT2G37040.1_PHE ammonia lyase 1, GeneName=PAL1	IPR008948_L-Aspartase-like; IPR001106_Aromatic amino acid lyase	PAL	0.48	2.20667	2.14333	3.05667	0.51	0.26	0.67	1.18	3.31	2.13	1.81	2.68	1.94	3.05	2.76	3.36
		Am_Rn_009545	4411	ATY39966.1_Phenylalanine ammonia lyase 1 [Astragalus membranaceus]	AT2G37040.1_PHE ammonia lyase 1, GeneName=PAL1	IPR008948_L-Aspartase-like; IPR001106_Aromatic amino acid lyase	PAL	6.34	6.14667	8.71667	9.16667	12.21	2.67	4.14	4.84	6.65	6.95	7.22	8.92	10.01	8.38	8.61	10.51
		Am_Rn_020351	3343	AID51446.1_phenylalanine ammonia-lyase 3 [Astragalus membranaceus]	AT2G37040.1_PHE ammonia lyase 1, GeneName=PAL1	IPR001106_Aromatic amino acid lyase; IPR008948_L-Aspartase-like; IPR005922_Phenylalanine ammonia-lyase	PAL	0.52	1.16333	0.886667	1.50667	1.27	0	0.29	0	1.99	1.5	0.38	0.44	1.84	1.53	2.1	0.89
		Am_Rn_024501	3082	AID51445.1_phenylalanine ammonia-lyase 2 [Astragalus membranaceus]	AT2G37040.1_PHE ammonia lyase 1, GeneName=PAL1	IPR008948_L-Aspartase-like; IPR005922_Phenylalanine ammonia-lyase; IPR001106_Aromatic amino acid lyase	PAL	48.2867	108.657	66.39	137.487	39.51	59.93	45.42	65.84	119.32	140.81	36	68.5	94.67	114.79	165.01	132.66
		Am_Rn_024732	3069	AID51446.1_phenylalanine ammonia-lyase 3 [Astragalus membranaceus]	AT2G37040.1_PHE ammonia lyase 1, GeneName=PAL1	IPR001106_Aromatic amino acid lyase; IPR008948_L-Aspartase-like; IPR005922_Phenylalanine ammonia-lyase	PAL	20.96	22.8267	26	29.3933	10.09	45.93	6.86	6.92	29.76	31.8	14.34	21.78	41.88	27.45	27.79	32.94
		Am_Rn_028045	2887	ATY39966.1_Phenylalanine ammonia lyase 1 [Astragalus membranaceus]	AT2G37040.1_PHE ammonia lyase 1, GeneName=PAL1	IPR001106_Aromatic amino acid lyase; IPR005922_Phenylalanine ammonia-lyase; IPR008948_L-Aspartase-like	PAL	308.083	165.77	176.093	158.873	502.88	255.18	166.19	172.09	152.79	172.43	81.11	197.81	249.36	161.37	193.76	121.49
		Am_Rn_028983	2837	ATY39966.1_Phenylalanine ammonia lyase 1 [Astragalus membranaceus]	AT2G37040.1_PHE ammonia lyase 1, GeneName=PAL1	IPR008948_L-Aspartase-like; IPR005922_Phenylalanine ammonia-lyase; IPR001106_Aromatic amino acid lyase	PAL	2.74667	2.15667	3.18667	2.18	4.71	1.77	1.76	1.54	0.91	4.02	2	2.54	5.02	1.91	1.34	3.29
		Am_Rn_029686	2801	ATY39966.1_Phenylalanine ammonia lyase 1 [Astragalus membranaceus]	AT2G37040.1_PHE ammonia lyase 1, GeneName=PAL1	IPR008948_L-Aspartase-like; IPR005922_Phenylalanine ammonia-lyase; IPR001106_Aromatic amino acid lyase	PAL	2.16667	0.89	1.06667	1.35333	5.44	1.06	0	0.61	2.06	0	1.83	1.37	0	2.22	1.84	0
		Am_Rn_029986	2788	QDG03197.1_phenylalanine ammonia-lyase [Glycyrrhiza uralensis]	AT3G53260.1_phenylalanine ammonia-lyase 2, GeneName=PAL2	IPR008948_L-Aspartase-like; IPR001106_Aromatic amino acid lyase; IPR005922_Phenylalanine ammonia-lyase	PAL	18.8033	32.54	97.6867	64.69	10.31	28.1	18	32.38	36.45	28.79	68.44	97.18	127.44	64.63	84.06	45.38
		Am_Rn_047201	2097	XP_004493977.1_phenylalanine ammonia-lyase 1 [Cicer arietinum]	AT2G37040.1_PHE ammonia lyase 1, GeneName=PAL1	IPR001106_Aromatic amino acid lyase; IPR008948_L-Aspartase-like; IPR005922_Phenylalanine ammonia-lyase	PAL	7.29	18.2933	8.61	21.2233	7.81	7.23	6.83	9.12	25.13	20.63	3.79	9.23	12.81	17.3	29.08	17.29
		Am_Rn_059275	1719	ATY39968.1_Phenylalanine ammonia lyase 3 [Astragalus membranaceus]	AT3G10340.1_phenylalanine ammonia-lyase 4, GeneName=PAL4	IPR001106_Aromatic amino acid lyase; IPR008948_L-Aspartase-like	PAL	0.903333	0.756667	0.456667	1.19	1.81	0.73	0.17	0.6	1.2	0.47	0	0.67	0.7	1.21	1.46	0.9
		Am_Rn_073673	1340	ATY39968.1_Phenylalanine ammonia lyase 3 [Astragalus membranaceus]	AT2G37040.1_PHE ammonia lyase 1, GeneName=PAL1	IPR008948_L-Aspartase-like; IPR001106_Aromatic amino acid lyase; IPR005922_Phenylalanine ammonia-lyase	PAL	30.1267	79.1	37.2467	88.85	33.33	35.91	21.14	36.64	110.95	89.71	8.85	39.01	63.88	50.18	132.72	83.65
		Am_Rn_074293	1326	ATY39967.1_Phenylalanine ammonia lyase 2 [Astragalus membranaceus]	AT2G37040.1_PHE ammonia lyase 1, GeneName=PAL1	IPR001106_Aromatic amino acid lyase; IPR008948_L-Aspartase-like; IPR005922_Phenylalanine ammonia-lyase	PAL	24.1633	79.5133	45.3633	82.6333	12.93	39.89	19.67	50.99	82.48	105.07	9.88	55.8	70.41	44.29	91.31	112.3
		Am_Rn_239221	251	ACO83023.1_phenylalanine ammonia lyase, partial [Trifolium subterraneum]	AT3G10340.1_phenylalanine ammonia-lyase 4, GeneName=PAL4	.	PAL	0.82	0	0	1.78667	2.46	0	0	0	0	0	0	0	0	2.61	2.75	0
Trinity	14	Am_Tr_117304	2000	ATY39966.1_Phenylalanine ammonia lyase 1 [Astragalus membranaceus]	AT2G37040.1_PHE ammonia lyase 1, GeneName=PAL1	IPR008948_L-Aspartase-like; IPR005922_Phenylalanine ammonia-lyase; IPR001106_Aromatic amino acid lyase	PAL	224.23	108.267	105.24	93.3833	362.98	193.32	116.39	110.71	100.69	113.4	29.8	125.86	160.06	84.69	112.62	82.84
		Am_Tr_117302	1949	ATY39966.1_Phenylalanine ammonia lyase 1 [Astragalus membranaceus]	AT2G37040.1_PHE ammonia lyase 1, GeneName=PAL1	IPR001106_Aromatic amino acid lyase; IPR008948_L-Aspartase-like; IPR005922_Phenylalanine ammonia-lyase	PAL	1.00667	1.23333	1.73667	0.983333	1.27	0.55	1.2	1.19	0	2.51	0.54	1.72	2.95	0	1.11	1.84
		Am_Tr_117303	1914	ATY39966.1_Phenylalanine ammonia lyase 1 [Astragalus membranaceus]	AT2G37040.1_PHE ammonia lyase 1, GeneName=PAL1	IPR001106_Aromatic amino acid lyase; IPR008948_L-Aspartase-like; IPR005922_Phenylalanine ammonia-lyase	PAL	2.13333	0.883333	0.633333	0.75	4.75	1.65	0	0.77	1.88	0	0.61	1.29	0	1.33	0.92	0
		Am_Tr_034988	1811	AID51445.1_phenylalanine ammonia-lyase 2 [Astragalus membranaceus]	AT2G37040.1_PHE ammonia lyase 1, GeneName=PAL1	IPR005922_Phenylalanine ammonia-lyase; IPR001106_Aromatic amino acid lyase; IPR008948_L-Aspartase-like	PAL	70.3367	123.467	83.17	155.433	48	100.72	62.29	70.96	131.88	167.56	49.95	80.49	119.07	135	176.76	154.54
		Am_Tr_054226	1231	ATY39968.1_Phenylalanine ammonia lyase 3 [Astragalus membranaceus]	AT2G37040.1_PHE ammonia lyase 1, GeneName=PAL1	IPR005922_Phenylalanine ammonia-lyase; IPR001106_Aromatic amino acid lyase; IPR008948_L-Aspartase-like	PAL	48.0833	88.2233	50.9567	98.46	44.63	64.23	35.39	46.91	119.24	98.52	22.9	51.19	78.78	77.63	130.04	87.71
		Am_Tr_034983	1087	ATY39967.1_Phenylalanine ammonia lyase 2 [Astragalus membranaceus]	AT2G37040.1_PHE ammonia lyase 1, GeneName=PAL1	IPR001106_Aromatic amino acid lyase; IPR008948_L-Aspartase-like	PAL	37.7267	83.5433	46.5167	97.0833	28.68	56.46	28.04	52.21	95.8	102.62	16.01	57.05	66.49	72.18	118.76	100.31
		Am_Tr_034987	1041	ATY39966.1_Phenylalanine ammonia lyase 1 [Astragalus membranaceus]	AT3G53260.1_phenylalanine ammonia-lyase 2, GeneName=PAL2	IPR001106_Aromatic amino acid lyase; IPR008948_L-Aspartase-like	PAL	404.983	180.047	210.08	191.653	643.71	315.3	255.94	187.33	161.77	191.04	149.02	213.57	267.65	220.51	228.06	126.39
		Am_Tr_096853	1040	ATY39968.1_Phenylalanine ammonia lyase 3 [Astragalus membranaceus]	AT2G37040.1_PHE ammonia lyase 1, GeneName=PAL1	.	PAL	3.30333	1.98667	3.45333	3.59333	1.84	7.24	0.83	0.85	2.46	2.65	4.95	3.03	2.38	4.65	2.86	3.27
		Am_Tr_117308	984	ATY39968.1_Phenylalanine ammonia lyase 3 [Astragalus membranaceus]	AT2G37040.1_PHE ammonia lyase 1, GeneName=PAL1	IPR008948_L-Aspartase-like; IPR001106_Aromatic amino acid lyase	PAL	19.3633	37.0933	18.69	44.8167	20.39	24.04	13.66	19.92	48.78	42.58	6.04	19.54	30.49	27.61	62.07	44.77
		Am_Tr_034984	956	ATY39967.1_Phenylalanine ammonia lyase 2 [Astragalus membranaceus]	AT2G37040.1_PHE ammonia lyase 1, GeneName=PAL1	IPR001106_Aromatic amino acid lyase; IPR008948_L-Aspartase-like	PAL	27.3033	63.2767	35.09	67.96	19.95	37.98	23.98	37.45	68.96	83.42	7.94	37.51	59.82	37.33	79.7	86.85
		Am_Tr_034986	849	ATY39968.1_Phenylalanine ammonia lyase 3 [Astragalus membranaceus]	AT2G37040.1_PHE ammonia lyase 1, GeneName=PAL1	IPR001106_Aromatic amino acid lyase; IPR008948_L-Aspartase-like	PAL	4.17333	8.46333	3.52	8.18333	5.19	4.41	2.92	4.01	15.26	6.12	0.64	4.08	5.84	3.68	14.03	6.84
		Am_Tr_096852	478	ATY39968.1_Phenylalanine ammonia lyase 3 [Astragalus membranaceus]	AT2G37040.1_PHE ammonia lyase 1, GeneName=PAL1	.	PAL	22.2667	39.5533	17.5367	50.7633	28.08	18.94	19.78	19.74	55.36	43.56	12.17	19.82	20.62	42.86	78.92	30.51
		Am_Tr_136903	386	PNY15901.1_phenylalanine amonnia lyase [Trifolium pratense]	AT2G37040.1_PHE ammonia lyase 1, GeneName=PAL1	IPR008948_L-Aspartase-like	PAL	0.486667	1.02667	1.34667	2.91667	0	0	1.46	0	0.64	2.44	0	2.07	1.97	3.47	1.41	3.87
		Am_Tr_117309	217	ACF94717.1_phenylalanine ammonia lyase, partial [Robinia pseudoacacia]	AT2G37040.1_PHE ammonia lyase 1, GeneName=PAL1	.	PAL	1.79667	3.26	2.46667	1.33667	0	5.39	0	0	5.33	4.45	0	0	7.4	0	0	4.01
Iso-seq	5	Am_HQ_49575	2030	AID51447.1_cinnamate 4-hydroxylase 2 [Astragalus membranaceus]	AT2G30490.1_cinnamate-4-hydroxylase, GeneName=C4H	IPR036396_Cytochrome P450 superfamily; IPR001128_Cytochrome P450; IPR002401_Cytochrome P450, E-class, group I	C4H	253.367	34.9033	57.6333	148.053	218.91	388.92	152.27	18.57	46.29	39.85	43.02	50.18	79.7	135.84	159.17	149.15
		Am_HQ_54640	1924	AEH68208.1_cinnamate 4-hydroxylase [Astragalus mongholicus]	AT2G30490.1_cinnamate-4-hydroxylase, GeneName=C4H	IPR001128_Cytochrome P450; IPR036396_Cytochrome P450 superfamily; IPR002401_Cytochrome P450, E-class, group I	C4H	6.41667	8.01667	11.1967	4.48333	18.19	1.06	0	21.85	1.67	0.53	30.99	1.49	1.11	10.53	2.2	0.72
		Am_HQ_56480	1886	XP_031385586.1_trans-cinnamate 4-monooxygenase isoform X2 [Punica granatum]	AT2G30490.1_cinnamate-4-hydroxylase, GeneName=C4H	IPR036396_Cytochrome P450 superfamily; IPR001128_Cytochrome P450; IPR002401_Cytochrome P450, E-class, group I	C4H	3.41667	2.68	2.55667	1.62333	4.88	0.68	4.69	0.59	3.28	4.17	1.88	3.37	2.42	0.35	2.08	2.44
		Am_HQ_56959	1855	AEH68208.1_cinnamate 4-hydroxylase [Astragalus mongholicus]	AT2G30490.1_cinnamate-4-hydroxylase, GeneName=C4H	IPR001128_Cytochrome P450; IPR036396_Cytochrome P450 superfamily; IPR002401_Cytochrome P450, E-class, group I	C4H	32.24	54.2467	77.5933	26.11	27.64	41.82	27.26	32.21	64.78	65.75	33.23	93.13	106.42	19.32	22.37	36.64
		Am_HQ_59770	1795	TKY50816.1_trans-cinnamate 4-monooxygenase [Spatholobus suberectus]	AT2G30490.1_cinnamate-4-hydroxylase, GeneName=C4H	IPR002401_Cytochrome P450, E-class, group I; IPR001128_Cytochrome P450; IPR036396_Cytochrome P450 superfamily	C4H	689.267	0.553333	7.17667	8.92333	526.75	857.3	683.75	0.46	0.45	0.75	6.64	6.45	8.44	8.25	4.7	13.82
rnaSPAdes	8	Am_Rn_020347	3343	ATY39969.1_Cinnamate-4-hydroxylase 1 [Astragalus membranaceus]	AT2G30490.1_cinnamate-4-hydroxylase, GeneName=C4H	IPR001128_Cytochrome P450; IPR036396_Cytochrome P450 superfamily; IPR002401_Cytochrome P450, E-class, group I	C4H	1.14333	0.26	0.256667	0.81	0.33	0.99	2.11	0	0.78	0	0	0.77	0	2.02	0.41	0
		Am_Rn_021865	3244	ATY39969.1_Cinnamate-4-hydroxylase 1 [Astragalus membranaceus]	AT2G30490.1_cinnamate-4-hydroxylase, GeneName=C4H	IPR002401_Cytochrome P450, E-class, group I; IPR001128_Cytochrome P450; IPR036396_Cytochrome P450 superfamily	C4H	5.56	1.32	2.15	7.87333	9.08	4.85	2.75	1.23	0.44	2.29	0.69	1.73	4.03	5.29	6.61	11.72
		Am_Rn_026491	2973	AEH68208.1_cinnamate 4-hydroxylase [Astragalus mongholicus]	AT2G30490.1_cinnamate-4-hydroxylase, GeneName=C4H	IPR001128_Cytochrome P450; IPR002401_Cytochrome P450, E-class, group I; IPR036396_Cytochrome P450 superfamily	C4H	0.466667	2.05333	2.18667	0.98	0.27	0.87	0.26	2.06	2.11	1.99	0.94	2.29	3.33	0.61	0.42	1.91
		Am_Rn_030019	2786	AID51447.1_cinnamate 4-hydroxylase 2 [Astragalus membranaceus]	AT2G30490.1_cinnamate-4-hydroxylase, GeneName=C4H	IPR036396_Cytochrome P450 superfamily; IPR001128_Cytochrome P450; IPR002401_Cytochrome P450, E-class, group I	C4H	175.163	27.3733	38.73	113.73	152.85	276.8	95.84	14.26	36.61	31.25	24.14	36.36	55.69	102.3	126.25	112.64
		Am_Rn_048175	2064	AEH68208.1_cinnamate 4-hydroxylase [Astragalus mongholicus]	AT2G30490.1_cinnamate-4-hydroxylase, GeneName=C4H	IPR001128_Cytochrome P450; IPR036396_Cytochrome P450 superfamily; IPR002401_Cytochrome P450, E-class, group I	C4H	37.04	65.3233	81.33	32.2467	46.7	38.95	25.47	55.76	68.87	71.34	50.98	92.26	100.75	30.2	27.25	39.29
		Am_Rn_052812	1916	TKY50816.1_trans-cinnamate 4-monooxygenase [Spatholobus suberectus]	AT2G30490.1_cinnamate-4-hydroxylase, GeneName=C4H	IPR036396_Cytochrome P450 superfamily; IPR001128_Cytochrome P450; IPR002401_Cytochrome P450, E-class, group I	C4H	16.36	0	0.103333	0.51	23.69	12.44	12.95	0	0	0	0	0.31	0	0	0.42	1.11
		Am_Rn_054996	1846	AID51447.1_cinnamate 4-hydroxylase 2 [Astragalus membranaceus]	AT2G30490.1_cinnamate-4-hydroxylase, GeneName=C4H	IPR002401_Cytochrome P450, E-class, group I; IPR036396_Cytochrome P450 superfamily; IPR001128_Cytochrome P450	C4H	0.1	0	2.05333	0	0	0.3	0	0	0	0	3.36	1.02	1.78	0	0	0
		Am_Rn_055170	1841	XP_027366179.1_cytochrome P450 CYP73A100-like [Abrus precatorius]	AT2G30490.1_cinnamate-4-hydroxylase, GeneName=C4H	IPR002401_Cytochrome P450, E-class, group I; IPR001128_Cytochrome P450; IPR036396_Cytochrome P450 superfamily	C4H	633.963	0.403333	6.54333	9.35	500.12	814.8	586.97	0.52	0.28	0.41	5.4	6.25	7.98	9.07	4.45	14.53
Trinity	9	Am_Tr_059710	3360	AID51447.1_cinnamate 4-hydroxylase 2 [Astragalus membranaceus]	AT2G30490.1_cinnamate-4-hydroxylase, GeneName=C4H	IPR002401_Cytochrome P450, E-class, group I; IPR001128_Cytochrome P450; IPR036396_Cytochrome P450 superfamily	C4H	5.16333	1.09667	1.72667	5.37667	7.72	4.61	3.16	1.01	0.82	1.46	0.48	1.53	3.17	3.23	4.22	8.68
		Am_Tr_003807	2929	AEH68208.1_cinnamate 4-hydroxylase [Astragalus mongholicus]	AT2G30490.1_cinnamate-4-hydroxylase, GeneName=C4H	IPR001128_Cytochrome P450; IPR002401_Cytochrome P450, E-class, group I; IPR036396_Cytochrome P450 superfamily	C4H	0.426667	1.59333	1.67667	0.746667	0.24	0.79	0.25	1.6	1.62	1.56	0.74	1.75	2.54	0.47	0.32	1.45
		Am_Tr_059711	2741	AID51447.1_cinnamate 4-hydroxylase 2 [Astragalus membranaceus]	AT2G30490.1_cinnamate-4-hydroxylase, GeneName=C4H	IPR036396_Cytochrome P450 superfamily; IPR001128_Cytochrome P450; IPR002401_Cytochrome P450, E-class, group I	C4H	151.967	20.5633	28.4333	83.37	130.8	240.97	84.13	11.13	26.96	23.6	18.64	26.45	40.21	71.28	93.44	85.39
		Am_Tr_059709	2462	XP_031385586.1_trans-cinnamate 4-monooxygenase isoform X2 [Punica granatum]	AT2G30490.1_cinnamate-4-hydroxylase, GeneName=C4H	IPR001128_Cytochrome P450; IPR036396_Cytochrome P450 superfamily; IPR002401_Cytochrome P450, E-class, group I	C4H	12.13	1.18667	2.56667	5.80667	8.3	16.51	11.58	0	1.98	1.58	1.62	2.25	3.83	11.23	4.2	1.99
		Am_Tr_059713	2161	AID51447.1_cinnamate 4-hydroxylase 2 [Astragalus membranaceus]	AT2G30490.1_cinnamate-4-hydroxylase, GeneName=C4H	IPR002401_Cytochrome P450, E-class, group I; IPR036396_Cytochrome P450 superfamily; IPR001128_Cytochrome P450	C4H	0.26	0.0466667	0.453333	1.19333	0	0	0.78	0	0	0.14	1.36	0	0	2.07	1.51	0
		Am_Tr_003804	2099	XP_031385586.1_trans-cinnamate 4-monooxygenase isoform X2 [Punica granatum]	AT2G30490.1_cinnamate-4-hydroxylase, GeneName=C4H	IPR036396_Cytochrome P450 superfamily; IPR001128_Cytochrome P450; IPR002401_Cytochrome P450, E-class, group I	C4H	2.51	1.78667	1.27667	0.973333	3.66	0.52	3.35	0.37	2.35	2.64	1.08	1.92	0.83	0.25	1.31	1.36
		Am_Tr_003806	2020	AEH68208.1_cinnamate 4-hydroxylase [Astragalus mongholicus]	AT2G30490.1_cinnamate-4-hydroxylase, GeneName=C4H	IPR001128_Cytochrome P450; IPR036396_Cytochrome P450 superfamily; IPR002401_Cytochrome P450, E-class, group I	C4H	32.09	49.8	62.2567	24.0433	39.03	35.21	22.03	43.56	51.51	54.33	40.05	69.89	76.83	23.52	19.81	28.8
		Am_Tr_174436	1942	XP_027934411.1_cytochrome P450 CYP73A100-like [Vigna unguiculata] QCE08638.1 trans-cinnamate 4-monooxygenase [Vigna unguiculata]	AT2G30490.1_cinnamate-4-hydroxylase, GeneName=C4H	IPR036396_Cytochrome P450 superfamily; IPR001128_Cytochrome P450; IPR002401_Cytochrome P450, E-class, group I	C4H	20.3267	0	0.106667	0.45	30.49	13.43	17.06	0	0	0	0	0.32	0	0	0.29	1.06
		Am_Tr_174435	1827	TKY50816.1_trans-cinnamate 4-monooxygenase [Spatholobus suberectus]	AT2G30490.1_cinnamate-4-hydroxylase, GeneName=C4H	IPR002401_Cytochrome P450, E-class, group I; IPR001128_Cytochrome P450; IPR036396_Cytochrome P450 superfamily	C4H	598.81	0.49	5.37333	7.22667	447.88	768.86	579.69	0.4	0.39	0.68	4.52	4.93	6.67	7.02	3.83	10.83
Iso-seq	20	Am_HQ_5942	3644	PNX95884.1_4-coumarate CoA ligase, partial [Trifolium pratense]	AT3G21240.2_4-coumarate:CoA ligase 2, GeneName=4CL2	IPR000873_AMP-dependent synthetase/ligase	4CL	0.906667	0.4	0.676667	1.44	0.81	1.76	0.15	0.22	0.43	0.55	0.23	0.91	0.89	0.47	1.82	2.03
		Am_HQ_13075	2974	QDG03189.1_4-coumarate:CoA ligase [Glycyrrhiza uralensis]	AT3G21240.1_4-coumarate:CoA ligase 2, GeneName=4CL2	IPR025110_AMP-binding enzyme, C-terminal domain; IPR000873_AMP-dependent synthetase/ligase	4CL	12.8633	11.4467	16.6667	38.5567	5.28	24.39	8.92	5.06	15.84	13.44	18.33	14.13	17.54	32.14	47.04	36.49
		Am_HQ_33841	2401	ATY39971.1_4-coumaroyl:CoA-ligase [Astragalus membranaceus]	AT1G20510.3_OPC-8:0 CoA ligase1, GeneName=OPCL1	IPR000873_AMP-dependent synthetase/ligase	4CL	15.26	31.0767	11.93	29.7433	2.82	5.35	37.61	42.98	1.02	49.23	5.99	0.65	29.15	36.07	0.56	52.6
		Am_HQ_38164	2283	QDG03189.1_4-coumarate:CoA ligase [Glycyrrhiza uralensis]	AT3G21240.2_4-coumarate:CoA ligase 2, GeneName=4CL2	IPR000873_AMP-dependent synthetase/ligase	4CL	0	0	1.72333	0	0	0	0	0	0	0	0.94	2.3	1.93	0	0	0
		Am_HQ_41737	2201	PNX95884.1_4-coumarate CoA ligase, partial [Trifolium pratense]	AT1G51680.2_4-coumarate:CoA ligase 1, GeneName=4CL1	IPR000873_AMP-dependent synthetase/ligase	4CL	19.7767	8.34	12.1333	25.0867	11.16	33.55	14.62	6.07	10.33	8.62	5.55	12.91	17.94	13.81	35.15	26.3
		Am_HQ_42278	2180	XP_004511423.1_4-coumarate--CoA ligase 2 [Cicer arietinum]	AT1G65060.1_4-coumarate:CoA ligase 3, GeneName=4CL3	IPR000873_AMP-dependent synthetase/ligase; IPR025110_AMP-binding enzyme, C-terminal domain	4CL	86.9067	71.64	52.35	49.55	49.12	167.23	44.37	46.05	85.59	83.28	32.44	52.26	72.35	36.15	55.14	57.36
		Am_HQ_44885	2124	XP_004512448.1_4-coumarate--CoA ligase-like 6 isoform X1 [Cicer arietinum]	AT4G19010.1_AMP-dependent synthetase and ligase family protein	IPR000873_AMP-dependent synthetase/ligase; IPR025110_AMP-binding enzyme, C-terminal domain	4CL	1.39	4.87667	7.04	10.2267	0.44	2.77	0.96	3.67	5.87	5.09	5.8	7.18	8.14	9.78	9	11.9
		Am_HQ_45655	2113	QDG03189.1_4-coumarate:CoA ligase [Glycyrrhiza uralensis]	AT3G21240.1_4-coumarate:CoA ligase 2, GeneName=4CL2	IPR025110_AMP-binding enzyme, C-terminal domain; IPR000873_AMP-dependent synthetase/ligase	4CL	111.453	26.59	50.7967	99.16	89.96	159.73	84.67	18.73	33.4	27.64	25.47	59	67.92	61.06	147.18	89.24
		Am_HQ_46786	2088	QDG03189.1_4-coumarate:CoA ligase [Glycyrrhiza uralensis]	AT3G21240.1_4-coumarate:CoA ligase 2, GeneName=4CL2	IPR025110_AMP-binding enzyme, C-terminal domain; IPR000873_AMP-dependent synthetase/ligase	4CL	9.57	3.35333	24.82	13.1033	6.32	14.92	7.47	2.49	3.99	3.58	20.97	26.63	26.86	8.87	19.95	10.49
		Am_HQ_46881	2076	ATY39971.1_4-coumaroyl:CoA-ligase [Astragalus membranaceus]	AT1G20510.1_OPC-8:0 CoA ligase1, GeneName=OPCL1	IPR025110_AMP-binding enzyme, C-terminal domain; IPR000873_AMP-dependent synthetase/ligase	4CL	51.88	79.4667	35.78	95.07	7.43	94.95	53.26	80.66	87.09	70.65	28.35	39.87	39.12	105.96	99.45	79.8
		Am_HQ_47701	2068	XP_045803451.1_4-coumarate--CoA ligase-like 9 [Trifolium pratense]	AT5G63380.1_AMP-dependent synthetase and ligase family protein	IPR000873_AMP-dependent synthetase/ligase; IPR025110_AMP-binding enzyme, C-terminal domain	4CL	7.80667	11.8233	12.0267	14.2967	4.85	10.51	8.06	10.47	14.22	10.78	13.22	12.49	10.37	12.61	16.72	13.56
		Am_HQ_48882	2002	AID51448.1_4-coumaroyl:CoA-ligase [Astragalus membranaceus]	AT3G21240.1_4-coumarate:CoA ligase 2, GeneName=4CL2	IPR000873_AMP-dependent synthetase/ligase; IPR025110_AMP-binding enzyme, C-terminal domain	4CL	30.0833	2.28667	6.53	21.9067	43.6	28.86	17.79	2.13	2.47	2.26	7.17	5.58	6.84	23.86	26.69	15.17
		Am_HQ_54948	1919	TKY54583.1_4-coumarate--CoA ligase 1 [Spatholobus suberectus]	AT1G51680.1_4-coumarate:CoA ligase 1, GeneName=4CL1	IPR000873_AMP-dependent synthetase/ligase; IPR025110_AMP-binding enzyme, C-terminal domain	4CL	0.103333	1.42333	21.75	0.0833333	0	0	0.31	0.67	2.31	1.29	8.69	32.74	23.82	0.06	0.13	0.06
		Am_HQ_59428	1775	XP_004515681.1_4-coumarate--CoA ligase-like 9 [Cicer arietinum]	AT5G63380.1_AMP-dependent synthetase and ligase family protein	IPR025110_AMP-binding enzyme, C-terminal domain; IPR000873_AMP-dependent synthetase/ligase	4CL	0.05	33.0167	2.69	5.64333	0	0.15	0	30.72	34.59	33.74	1.75	2.6	3.72	6.02	4.37	6.54
		Am_HQ_75603	1469	XP_004515681.1_4-coumarate--CoA ligase-like 9 [Cicer arietinum]	AT5G63380.1_AMP-dependent synthetase and ligase family protein	IPR000873_AMP-dependent synthetase/ligase	4CL	2.5	8.96	1.34333	1.57	4.46	0.81	2.23	7.01	12.06	7.81	0.33	1.23	2.47	0.62	2.08	2.01
		Am_HQ_19597	2830	PNX74615.1_4-coumarate-CoA ligase 10-like protein [Trifolium pratense]	AT3G48990.1_AMP-dependent synthetase and ligase family protein, GeneName=AAE3	IPR000873_AMP-dependent synthetase/ligase	4CL	4.74667	11.86	16.4267	1.73333	2.08	6.87	5.29	11.41	14.41	9.76	9.37	16	23.91	2.16	1.95	1.09
		Am_HQ_31440	2456	PNX74615.1_4-coumarate-CoA ligase 10-like protein [Trifolium pratense]	AT3G48990.1_AMP-dependent synthetase and ligase family protein, GeneName=AAE3	.	4CL	28.8833	100.933	79.7033	9.35333	20.04	42.47	24.14	92.85	110.9	99.05	48.98	93.93	96.2	10.84	10.23	6.99
		Am_HQ_35242	2357	PNX71577.1_4-coumarate-CoA ligase 9-like protein, partial [Trifolium pratense]	AT5G63380.1_AMP-dependent synthetase and ligase family protein	IPR000873_AMP-dependent synthetase/ligase	4CL	2.55667	4.72333	5.84333	5.05	1.21	3.4	3.06	4.89	5.16	4.12	4.45	7.82	5.26	4.67	4.9	5.58
		Am_HQ_43470	2078	PNX74615.1_4-coumarate-CoA ligase 10-like protein [Trifolium pratense]	AT3G48990.1_AMP-dependent synthetase and ligase family protein, GeneName=AAE3	.	4CL	15.7467	30.0967	25.8733	6.23	11.71	21.17	14.36	29.27	31.73	29.29	15.42	33.27	28.93	7.12	6.43	5.14
		Am_HQ_50709	1992	PNY17269.1_4-coumarate-CoA ligase 7-like protein [Trifolium pratense]	AT4G05160.1_AMP-dependent synthetase and ligase family protein	IPR025110_AMP-binding enzyme, C-terminal domain; IPR000873_AMP-dependent synthetase/ligase	4CL	14.65	79.98	51.9667	19.9633	6.93	24.18	12.84	79.13	51.64	109.17	35.09	50.76	70.05	23.93	13.11	22.85
rnaSPAdes	35	Am_Rn_001710	6930	PNY17269.1_4-coumarate-CoA ligase 7-like protein [Trifolium pratense]	AT4G05160.1_AMP-dependent synthetase and ligase family protein	IPR000873_AMP-dependent synthetase/ligase; IPR025110_AMP-binding enzyme, C-terminal domain	4CL	0.74	0.743333	0.506667	1.84667	1.23	0.48	0.51	0.72	0.24	1.27	0	0.8	0.72	1.51	0.88	3.15
		Am_Rn_002313	6485	PNY17269.1_4-coumarate-CoA ligase 7-like protein [Trifolium pratense]	AT4G05160.1_AMP-dependent synthetase and ligase family protein	IPR000873_AMP-dependent synthetase/ligase; IPR025110_AMP-binding enzyme, C-terminal domain	4CL	3.63	26.7367	15.61	6.06667	0.97	7.03	2.89	26.24	18.05	35.92	8.64	16.65	21.54	7.35	4.63	6.22
		Am_Rn_003106	6034	PNX95884.1_4-coumarate CoA ligase, partial [Trifolium pratense]	AT3G21240.2_4-coumarate:CoA ligase 2, GeneName=4CL2	IPR000873_AMP-dependent synthetase/ligase	4CL	0.666667	0.353333	0.483333	1.3	0.68	1.2	0.12	0.17	0.45	0.44	0.26	0.66	0.53	0.43	1.55	1.92
		Am_Rn_008298	4609	PNX74615.1_4-coumarate-CoA ligase 10-like protein [Trifolium pratense]	AT3G48990.1_AMP-dependent synthetase and ligase family protein, GeneName=AAE3	IPR000873_AMP-dependent synthetase/ligase	4CL	3.54333	8.31	10.58	1.09667	2.34	4.81	3.48	7.57	8.57	8.79	5.36	11.17	15.21	1.28	1.24	0.77
		Am_Rn_008961	4505	ATY39971.1_4-coumaroyl:CoA-ligase [Astragalus membranaceus]	AT1G20510.3_OPC-8:0 CoA ligase1, GeneName=OPCL1	IPR000873_AMP-dependent synthetase/ligase	4CL	2.21333	1.15	0.283333	1.75	0.89	4.52	1.23	2.43	1.02	0	0.18	0.58	0.09	4.22	0.58	0.45
		Am_Rn_012986	3972	ATY39971.1_4-coumaroyl:CoA-ligase [Astragalus membranaceus]	AT1G20510.1_OPC-8:0 CoA ligase1, GeneName=OPCL1	IPR025110_AMP-binding enzyme, C-terminal domain; IPR000873_AMP-dependent synthetase/ligase	4CL	13.49	31.4167	13.4533	38.03	1.1	17.95	21.42	32.7	23.06	38.49	13.52	9.81	17.03	43.33	30.94	39.82
		Am_Rn_013340	3933	XP_004515681.1_4-coumarate--CoA ligase-like 9 [Cicer arietinum]	AT5G63380.1_AMP-dependent synthetase and ligase family protein	IPR025110_AMP-binding enzyme, C-terminal domain; IPR000873_AMP-dependent synthetase/ligase	4CL	0.856667	16.7733	1.74	3.25667	1.49	0.4	0.68	15.06	18.25	17.01	0.83	1.74	2.65	2.82	3.01	3.94
		Am_Rn_015230	3750	QDG03189.1_4-coumarate:CoA ligase [Glycyrrhiza uralensis]	AT3G21240.1_4-coumarate:CoA ligase 2, GeneName=4CL2	IPR025110_AMP-binding enzyme, C-terminal domain; IPR000873_AMP-dependent synthetase/ligase	4CL	69.3067	26.6733	44.71	102.853	53.34	105.2	49.38	16.85	31.41	31.76	30.25	48.88	55	74.22	141.23	93.11
		Am_Rn_027011	2944	XP_004511423.1_4-coumarate--CoA ligase 2 [Cicer arietinum]	AT1G65060.1_4-coumarate:CoA ligase 3, GeneName=4CL3	IPR000873_AMP-dependent synthetase/ligase	4CL	1.16667	0.873333	1.02667	0.916667	2.29	0.81	0.4	0.27	0.84	1.51	0.83	0.96	1.29	0.36	0.52	1.87
		Am_Rn_027231	2932	AID51448.1_4-coumaroyl:CoA-ligase [Astragalus membranaceus]	AT3G21240.1_4-coumarate:CoA ligase 2, GeneName=4CL2	IPR000873_AMP-dependent synthetase/ligase; IPR025110_AMP-binding enzyme, C-terminal domain	4CL	12.7433	0.7	1.61333	9.30333	22.1	10.36	5.77	1.13	0.62	0.35	1.32	2.13	1.39	14.97	8.48	4.46
		Am_Rn_028011	2889	PNX71577.1_4-coumarate-CoA ligase 9-like protein, partial [Trifolium pratense]	AT5G63380.1_AMP-dependent synthetase and ligase family protein	IPR000873_AMP-dependent synthetase/ligase	4CL	0.673333	1.33333	1.09667	1.55667	0.22	1.2	0.6	1.11	1.19	1.7	1.08	1.74	0.47	0.9	1.69	2.08
		Am_Rn_030362	2770	PNX74615.1_4-coumarate-CoA ligase 10-like protein [Trifolium pratense]	AT3G48990.1_AMP-dependent synthetase and ligase family protein, GeneName=AAE3	.	4CL	49.3367	117.637	102.513	14.04	26.5	73.82	47.69	111.04	131.99	109.88	40.05	126.58	140.91	15.5	15.18	11.44
		Am_Rn_032773	2655	AID51448.1_4-coumaroyl:CoA-ligase [Astragalus membranaceus]	AT3G21240.2_4-coumarate:CoA ligase 2, GeneName=4CL2	IPR000873_AMP-dependent synthetase/ligase	4CL	2.86667	0.07	0.216667	1.39	6.49	0.69	1.42	0	0.21	0	0.31	0.34	0	1.17	1.7	1.3
		Am_Rn_033083	2641	KHN12599.1_4-coumarate--CoA ligase-like 5 [Glycine soja]	AT1G20510.1_OPC-8:0 CoA ligase1, GeneName=OPCL1	.	4CL	2.81667	4.24	0.88	3.81667	1.19	1.18	6.08	9.3	0.79	2.63	1.41	0.22	1.01	8.74	1.01	1.7
		Am_Rn_033433	2627	AID51448.1_4-coumaroyl:CoA-ligase [Astragalus membranaceus]	AT3G21240.1_4-coumarate:CoA ligase 2, GeneName=4CL2	IPR000873_AMP-dependent synthetase/ligase; IPR025110_AMP-binding enzyme, C-terminal domain	4CL	9.96	1.34667	4.01667	10.38	9.57	12.95	7.36	0.72	1.54	1.78	4.59	2.64	4.82	6.82	15.4	8.92
		Am_Rn_036208	2508	TKY54583.1_4-coumarate--CoA ligase 1 [Spatholobus suberectus]	AT1G51680.1_4-coumarate:CoA ligase 1, GeneName=4CL1	IPR025110_AMP-binding enzyme, C-terminal domain; IPR000873_AMP-dependent synthetase/ligase	4CL	0.0366667	1.14	15.8433	0.0533333	0	0	0.11	0.58	2.03	0.81	5.48	23.37	18.68	0.05	0.11	0
		Am_Rn_037463	2455	XP_004511423.1_4-coumarate--CoA ligase 2 [Cicer arietinum]	AT1G65060.1_4-coumarate:CoA ligase 3, GeneName=4CL3	IPR000873_AMP-dependent synthetase/ligase; IPR025110_AMP-binding enzyme, C-terminal domain	4CL	75.9333	72.4933	46.59	49.2667	42.89	149.32	35.59	47.16	85.64	84.68	24.23	49.14	66.4	35.68	56.12	56
		Am_Rn_040862	2320	ATY39971.1_4-coumaroyl:CoA-ligase [Astragalus membranaceus]	AT1G20510.3_OPC-8:0 CoA ligase1, GeneName=OPCL1	IPR000873_AMP-dependent synthetase/ligase	4CL	33.1467	63.4067	20.9633	62.6033	6.52	51.34	41.58	76.75	46.78	66.69	2.96	20.71	39.22	65.5	47.69	74.62
		Am_Rn_042798	2250	XP_004512448.1_4-coumarate--CoA ligase-like 6 isoform X1 [Cicer arietinum]	AT4G19010.1_AMP-dependent synthetase and ligase family protein	IPR025110_AMP-binding enzyme, C-terminal domain; IPR000873_AMP-dependent synthetase/ligase	4CL	1.21667	5.12333	6.47667	10.9733	0.43	2.39	0.83	4.03	5.87	5.47	4.74	6.89	7.8	10.15	9.82	12.95
		Am_Rn_045123	2168	PNX95884.1_4-coumarate CoA ligase, partial [Trifolium pratense]	AT3G21240.2_4-coumarate:CoA ligase 2, GeneName=4CL2	IPR000873_AMP-dependent synthetase/ligase	4CL	21.93	9.64	14.3367	17.4567	13.65	39.63	12.51	6.72	16.61	5.59	0.57	17.95	24.49	0	30.38	21.99
		Am_Rn_051442	1959	XP_004497538.1_4-coumarate--CoA ligase-like 7 [Cicer arietinum]	AT4G05160.1_AMP-dependent synthetase and ligase family protein	IPR000873_AMP-dependent synthetase/ligase; IPR025110_AMP-binding enzyme, C-terminal domain	4CL	1.82	0.773333	0.793333	0.656667	1.2	3.06	1.2	0.9	0.86	0.56	0.29	1.23	0.86	0.86	0.67	0.44
		Am_Rn_057005	1786	TKY54583.1_4-coumarate--CoA ligase 1 [Spatholobus suberectus]	AT1G51680.2_4-coumarate:CoA ligase 1, GeneName=4CL1	IPR000873_AMP-dependent synthetase/ligase	4CL	0.116667	0.203333	4.98	0.0266667	0	0	0.35	0	0	0.61	2.17	9.07	3.7	0	0	0.08
		Am_Rn_058222	1750	XP_045803451.1_4-coumarate--CoA ligase-like 9 [Trifolium pratense]	AT5G63380.1_AMP-dependent synthetase and ligase family protein	IPR025110_AMP-binding enzyme, C-terminal domain; IPR000873_AMP-dependent synthetase/ligase	4CL	8.83667	17.84	16.37	19.93	5.62	12	8.89	17.08	21.09	15.35	11.47	20.96	16.68	16.81	22.45	20.53
		Am_Rn_060471	1685	PNX95884.1_4-coumarate CoA ligase, partial [Trifolium pratense]	AT1G51680.2_4-coumarate:CoA ligase 1, GeneName=4CL1	IPR000873_AMP-dependent synthetase/ligase	4CL	0.363333	0.39	9.08667	0.676667	0.14	0.95	0	0.15	0.62	0.4	2.66	11.27	13.33	0.31	0.79	0.93
		Am_Rn_083267	1124	XP_026271613.1_probable 4-coumarate--CoA ligase 3 [Frankliniella occidentalis]	AT5G63380.1_AMP-dependent synthetase and ligase family protein	IPR025110_AMP-binding enzyme, C-terminal domain; IPR000873_AMP-dependent synthetase/ligase	4CL	0	0.05	1.44667	0	0	0	0	0	0.15	0	2.46	1.05	0.83	0	0	0
		Am_Rn_084592	1096	PNX77888.1_4-coumarate-CoA ligase 9-like protein, partial [Trifolium pratense]	AT5G63380.1_AMP-dependent synthetase and ligase family protein	.	4CL	1.46333	2.35	2.00333	6.25333	2.93	0.86	0.6	3	1.38	2.67	3.86	0.68	1.47	15.64	1.7	1.42
		Am_Rn_084796	1092	XP_026280686.1_4-coumarate--CoA ligase 1 [Frankliniella occidentalis] XP_026280695.1 4-coumarate--CoA ligase 1 [Frankliniella occidentalis] XP_026280704.1 4-coumarate--CoA ligase 1 [Frankliniella occidentalis]	AT3G21240.1_4-coumarate:CoA ligase 2, GeneName=4CL2	IPR000873_AMP-dependent synthetase/ligase; IPR025110_AMP-binding enzyme, C-terminal domain	4CL	0	0	1.19667	0	0	0	0	0	0	0	3.59	0	0	0	0	0
		Am_Rn_096680	875	PNS13950.1_4-coumarate--CoA ligase-like 7 [Sphaceloma murrayae]	AT3G48990.1_AMP-dependent synthetase and ligase family protein, GeneName=AAE3	IPR025110_AMP-binding enzyme, C-terminal domain; IPR000873_AMP-dependent synthetase/ligase	4CL	0	0	0	1.33	0	0	0	0	0	0	0	0	0	3.79	0.2	0
		Am_Rn_109116	696	PNX77888.1_4-coumarate-CoA ligase 9-like protein, partial [Trifolium pratense]	AT5G63380.1_AMP-dependent synthetase and ligase family protein	IPR000873_AMP-dependent synthetase/ligase; IPR025110_AMP-binding enzyme, C-terminal domain	4CL	8.88	13.0867	15.5333	15.5767	3.77	12.83	10.04	12.4	14.08	12.78	20.93	14.52	11.15	15.8	17.33	13.6
		Am_Rn_157509	380	PNS13950.1_4-coumarate--CoA ligase-like 7 [Sphaceloma murrayae]	.	IPR000873_AMP-dependent synthetase/ligase	4CL	0	0	0	1.26333	0	0	0	0	0	0	0	0	0	3.01	0.78	0
		Am_Rn_189745	307	XP_026290973.1_4-coumarate--CoA ligase 1-like [Frankliniella occidentalis]	.	IPR000873_AMP-dependent synthetase/ligase	4CL	0	0	1.55333	0	0	0	0	0	0	0	2.13	2.53	0	0	0	0
		Am_Rn_217837	270	XP_026271613.1_probable 4-coumarate--CoA ligase 3 [Frankliniella occidentalis]	.	.	4CL	0	0	1.3	0	0	0	0	0	0	0	0	3.9	0	0	0	0
		Am_Rn_219674	268	PNS13950.1_4-coumarate--CoA ligase-like 7 [Sphaceloma murrayae]	.	.	4CL	0	0	0	2.12333	0	0	0	0	0	0	0	0	0	0	6.37	0
		Am_Rn_242109	250	KXH47965.1_4-coumarate-CoA ligase [Colletotrichum nymphaeae SA-01]	.	.	4CL	0	2.32667	0	0	0	0	0	0	0	6.98	0	0	0	0	0	0
		Am_Rn_267208	239	XP_034251150.1_4-coumarate--CoA ligase 1-like [Thrips palmi]	AT1G62940.1_acyl-CoA synthetase 5, GeneName=ACOS5	.	4CL	0	0	3.17333	0	0	0	0	0	0	0	0	0	9.52	0	0	0
Trinity	49	Am_Tr_015742	4867	PNY17269.1_4-coumarate-CoA ligase 7-like protein [Trifolium pratense]	AT4G05160.1_AMP-dependent synthetase and ligase family protein	IPR000873_AMP-dependent synthetase/ligase; IPR025110_AMP-binding enzyme, C-terminal domain	4CL	1.51333	2.51	1.39667	0.78	1.35	1.61	1.58	4.47	1.06	2	0.71	1.81	1.67	0.68	1.66	0
		Am_Tr_015743	4737	PNY17269.1_4-coumarate-CoA ligase 7-like protein [Trifolium pratense]	AT4G05160.1_AMP-dependent synthetase and ligase family protein	IPR000873_AMP-dependent synthetase/ligase; IPR025110_AMP-binding enzyme, C-terminal domain	4CL	1.99	1.04	0.873333	1.85333	2.21	0.98	2.78	1.68	0.8	0.64	0.84	1.04	0.74	4.14	0	1.42
		Am_Tr_015736	4368	PNY17269.1_4-coumarate-CoA ligase 7-like protein [Trifolium pratense]	AT4G05160.1_AMP-dependent synthetase and ligase family protein	IPR000873_AMP-dependent synthetase/ligase; IPR025110_AMP-binding enzyme, C-terminal domain	4CL	0	0.173333	1.81333	0.3	0	0	0	0.3	0	0.22	0.55	2.17	2.72	0.32	0	0.58
		Am_Tr_015739	4071	PNY17269.1_4-coumarate-CoA ligase 7-like protein [Trifolium pratense]	AT4G05160.1_AMP-dependent synthetase and ligase family protein	IPR000873_AMP-dependent synthetase/ligase; IPR025110_AMP-binding enzyme, C-terminal domain	4CL	7.15333	5.02333	3.43	2.77333	4.03	3.21	14.22	6.94	3.78	4.35	3.91	3.28	3.1	5.26	1.53	1.53
		Am_Tr_015734	3941	PNY17269.1_4-coumarate-CoA ligase 7-like protein [Trifolium pratense]	AT4G05160.1_AMP-dependent synthetase and ligase family protein	IPR000873_AMP-dependent synthetase/ligase; IPR025110_AMP-binding enzyme, C-terminal domain	4CL	23.36	38.2933	26.5133	18.5567	9.71	29.6	30.77	28.37	33.62	52.89	15.38	28.36	35.8	17.41	18.35	19.91
		Am_Tr_041483	3800	QDG03189.1_4-coumarate:CoA ligase [Glycyrrhiza uralensis]	AT3G21240.1_4-coumarate:CoA ligase 2, GeneName=4CL2	IPR000873_AMP-dependent synthetase/ligase; IPR025110_AMP-binding enzyme, C-terminal domain	4CL	73.77	24.5267	42.4533	84.6033	53.65	114.56	53.1	15.75	30.77	27.06	24.29	47.88	55.19	56.18	118.09	79.54
		Am_Tr_018126	3678	PNX74615.1_4-coumarate-CoA ligase 10-like protein [Trifolium pratense]	AT3G48990.1_AMP-dependent synthetase and ligase family protein, GeneName=AAE3	IPR000873_AMP-dependent synthetase/ligase	4CL	2.37667	9.33	7.83333	0.56	1.73	3.39	2.01	7.13	10.81	10.05	4.51	7.74	11.25	0.74	0.72	0.22
		Am_Tr_071675	3273	ATY39971.1_4-coumaroyl:CoA-ligase [Astragalus membranaceus]	AT1G20510.3_OPC-8:0 CoA ligase1, GeneName=OPCL1	IPR000873_AMP-dependent synthetase/ligase	4CL	8.07667	11.7	5.21	16.51	0.6	15.65	7.98	11.75	11.89	11.46	6.13	3.94	5.56	20.64	14.4	14.49
		Am_Tr_015732	3183	PNY17269.1_4-coumarate-CoA ligase 7-like protein [Trifolium pratense]	AT4G05160.1_AMP-dependent synthetase and ligase family protein	IPR000873_AMP-dependent synthetase/ligase; IPR025110_AMP-binding enzyme, C-terminal domain	4CL	1.02	6.91667	1.41333	1.38667	0.33	1.36	1.37	10.35	1.58	8.82	0.29	1.24	2.71	3.22	0.63	0.31
		Am_Tr_018129	2928	PNX74615.1_4-coumarate-CoA ligase 10-like protein [Trifolium pratense]	AT3G48990.1_AMP-dependent synthetase and ligase family protein, GeneName=AAE3	IPR000873_AMP-dependent synthetase/ligase	4CL	11.76	0.78	0.813333	1.59667	9.13	11.14	15.01	1.24	0.49	0.61	0.53	0.89	1.02	4.34	0.37	0.08
		Am_Tr_093806	2921	XP_004511423.1_4-coumarate--CoA ligase 2 [Cicer arietinum]	AT1G65060.1_4-coumarate:CoA ligase 3, GeneName=4CL3	IPR000873_AMP-dependent synthetase/ligase	4CL	1.10333	0.683333	0.89	0.7	2.29	0.63	0.39	0.21	0.65	1.19	0.75	0.84	1.08	0.28	0.39	1.43
		Am_Tr_102690	2706	RZB83939.1_4-coumarate--CoA ligase-like 7 isoform C [Glycine soja]	AT4G05160.1_AMP-dependent synthetase and ligase family protein	.	4CL	0.476667	1.86667	3.45333	3.99333	0.36	0.76	0.31	1.88	2.59	1.13	2.92	5.16	2.28	3.38	6.2	2.4
		Am_Tr_160621	2641	AID51448.1_4-coumaroyl:CoA-ligase [Astragalus membranaceus]	AT3G21240.2_4-coumarate:CoA ligase 2, GeneName=4CL2	IPR000873_AMP-dependent synthetase/ligase	4CL	10.3833	0.833333	2.27333	8.07667	13.92	8.93	8.3	0.96	0.98	0.56	2.62	1.59	2.61	9.37	9.24	5.62
		Am_Tr_207368	2508	TKY54583.1_4-coumarate--CoA ligase 1 [Spatholobus suberectus]	AT1G51680.1_4-coumarate:CoA ligase 1, GeneName=4CL1	IPR025110_AMP-binding enzyme, C-terminal domain; IPR000873_AMP-dependent synthetase/ligase	4CL	0.03	0.876667	11.87	0.0433333	0	0	0.09	0.45	1.55	0.63	4.25	17.79	13.57	0.04	0.09	0
		Am_Tr_093803	2433	XP_004511423.1_4-coumarate--CoA ligase 2 [Cicer arietinum]	AT1G65060.1_4-coumarate:CoA ligase 3, GeneName=4CL3	IPR000873_AMP-dependent synthetase/ligase; IPR025110_AMP-binding enzyme, C-terminal domain	4CL	68.9067	56.4267	34.3533	37.7733	36.22	136.47	34.03	36.64	66.36	66.28	14.79	37.53	50.74	27.58	42.73	43.01
		Am_Tr_133602	2318	XP_004515681.1_4-coumarate--CoA ligase-like 9 [Cicer arietinum]	AT5G63380.1_AMP-dependent synthetase and ligase family protein	IPR025110_AMP-binding enzyme, C-terminal domain; IPR000873_AMP-dependent synthetase/ligase	4CL	0.03	24.8133	1.51667	3.87333	0	0.09	0	23.16	25.2	26.08	0.72	1.38	2.45	3.94	2.95	4.73
		Am_Tr_071674	2150	ATY39971.1_4-coumaroyl:CoA-ligase [Astragalus membranaceus]	AT1G20510.1_OPC-8:0 CoA ligase1, GeneName=OPCL1	IPR000873_AMP-dependent synthetase/ligase; IPR025110_AMP-binding enzyme, C-terminal domain	4CL	47.4067	79.2733	27.71	81.05	7.26	67.67	67.29	89.99	56.24	91.59	12.43	24.93	45.77	87.85	61.68	93.62
		Am_Tr_053753	2115	XP_004512448.1_4-coumarate--CoA ligase-like 6 isoform X1 [Cicer arietinum]	AT4G19010.1_AMP-dependent synthetase and ligase family protein	IPR025110_AMP-binding enzyme, C-terminal domain; IPR000873_AMP-dependent synthetase/ligase	4CL	0.896667	2.88333	4.27	6.52333	0.31	1.58	0.8	2.11	3.35	3.19	3.51	4.49	4.81	6.91	5.74	6.92
		Am_Tr_160622	2078	AID51448.1_4-coumaroyl:CoA-ligase [Astragalus membranaceus]	AT3G21240.1_4-coumarate:CoA ligase 2, GeneName=4CL2	IPR025110_AMP-binding enzyme, C-terminal domain; IPR000873_AMP-dependent synthetase/ligase	4CL	8.92667	0.843333	1.66333	6.10333	11.55	10.16	5.07	0.52	1.06	0.95	1.01	2.07	1.91	5.47	8.36	4.48
		Am_Tr_019735	2076	XP_045803451.1_4-coumarate--CoA ligase-like 9 [Trifolium pratense]	AT5G63380.1_AMP-dependent synthetase and ligase family protein	IPR000873_AMP-dependent synthetase/ligase	4CL	7.44	11.3067	11.12	12.75	3.85	9.85	8.62	10.56	12.13	11.23	10.38	13.35	9.63	11.17	13.57	13.51
		Am_Tr_207369	1786	TKY54583.1_4-coumarate--CoA ligase 1 [Spatholobus suberectus]	AT1G51680.2_4-coumarate:CoA ligase 1, GeneName=4CL1	IPR000873_AMP-dependent synthetase/ligase	4CL	0	0.156667	3.29667	0	0	0	0	0	0	0.47	1.66	6.98	1.25	0	0	0
		Am_Tr_160616	1737	AID51448.1_4-coumaroyl:CoA-ligase [Astragalus membranaceus]	AT3G21240.2_4-coumarate:CoA ligase 2, GeneName=4CL2	IPR000873_AMP-dependent synthetase/ligase	4CL	4.04333	0	0	0	11.01	0	1.12	0	0	0	0	0	0	0	0	0
		Am_Tr_053752	1632	XP_004512448.1_4-coumarate--CoA ligase-like 6 isoform X1 [Cicer arietinum]	AT4G19010.1_AMP-dependent synthetase and ligase family protein	IPR000873_AMP-dependent synthetase/ligase	4CL	0.383333	1.66667	1.28	3.19	0.13	1.02	0	1.7	1.83	1.47	0.12	1.66	2.06	1.87	3.17	4.53
		Am_Tr_160617	1621	AID51448.1_4-coumaroyl:CoA-ligase [Astragalus membranaceus]	AT3G21240.2_4-coumarate:CoA ligase 2, GeneName=4CL2	IPR000873_AMP-dependent synthetase/ligase	4CL	7.59333	0.316667	1.18	5.55333	10	9.8	2.98	0.37	0	0.58	1.14	1.29	1.11	6.71	6.48	3.47
		Am_Tr_207367	1621	TKY54583.1_4-coumarate--CoA ligase 1 [Spatholobus suberectus]	AT1G51680.2_4-coumarate:CoA ligase 1, GeneName=4CL1	IPR000873_AMP-dependent synthetase/ligase	4CL	0.136667	0	1.07333	0.0233333	0	0	0.41	0	0	0	0.43	0	2.79	0	0	0.07
		Am_Tr_071678	1613	KHN12599.1_4-coumarate--CoA ligase-like 5 [Glycine soja]	AT1G20510.1_OPC-8:0 CoA ligase1, GeneName=OPCL1	.	4CL	3.65333	5.31667	1.3	5.13333	0	0	10.96	11.81	1.19	2.95	2.09	0.34	1.47	12.8	0.8	1.8
		Am_Tr_071677	1500	KHN12599.1_4-coumarate--CoA ligase-like 5 [Glycine soja]	AT1G20510.1_OPC-8:0 CoA ligase1, GeneName=OPCL1	.	4CL	1.03667	0.783333	0.0633333	0.756667	0.68	2.01	0.42	1.14	0	1.21	0.19	0	0	0.65	0.78	0.84
		Am_Tr_092554	1407	XP_004515681.1_4-coumarate--CoA ligase-like 9 [Cicer arietinum]	AT5G63380.1_AMP-dependent synthetase and ligase family protein	IPR000873_AMP-dependent synthetase/ligase	4CL	2.01333	2.65	0.476667	0.373333	4.16	0.52	1.36	1.06	4.96	1.93	0	1.08	0.35	0	1.12	0
		Am_Tr_071679	1392	ATY39971.1_4-coumaroyl:CoA-ligase [Astragalus membranaceus]	AT1G20510.1_OPC-8:0 CoA ligase1, GeneName=OPCL1	IPR025110_AMP-binding enzyme, C-terminal domain	4CL	0.766667	2.77333	0.366667	1.91667	0	0	2.3	2.46	0.2	5.66	1.1	0	0	2.31	0.92	2.52
		Am_Tr_160626	1133	AID51448.1_4-coumaroyl:CoA-ligase [Astragalus membranaceus]	AT3G21240.1_4-coumarate:CoA ligase 2, GeneName=4CL2	.	4CL	1.13333	0.0133333	1.08667	1.67	3	0	0.4	0	0.04	0	2.71	0.27	0.28	3.17	0.72	1.12
		Am_Tr_093804	932	KHN35141.1_4-coumarate--CoA ligase 2 [Glycine soja]	AT1G65060.1_4-coumarate:CoA ligase 3, GeneName=4CL3	.	4CL	2.27333	0.493333	4.66	0.166667	5.79	0	1.03	0	0	1.48	13.57	0	0.41	0	0	0.5
		Am_Tr_260587	887	XP_026271613.1_probable 4-coumarate--CoA ligase 3 [Frankliniella occidentalis]	AT5G63380.1_AMP-dependent synthetase and ligase family protein	IPR025110_AMP-binding enzyme, C-terminal domain; IPR000873_AMP-dependent synthetase/ligase	4CL	0	0.0533333	1.27	0	0	0	0	0	0.16	0	2.38	0.94	0.49	0	0	0
		Am_Tr_071670	879	ATY39971.1_4-coumaroyl:CoA-ligase [Astragalus membranaceus]	AT1G20510.1_OPC-8:0 CoA ligase1, GeneName=OPCL1	.	4CL	1.9	2.19	0.0466667	1.04333	1.03	0.18	4.49	5.18	0.19	1.2	0	0.14	0	2.98	0.15	0
		Am_Tr_019732	849	PNX77888.1_4-coumarate-CoA ligase 9-like protein, partial [Trifolium pratense]	AT5G63380.1_AMP-dependent synthetase and ligase family protein	.	4CL	1.60333	1.31333	1.9	3.22333	2.71	1.23	0.87	2.01	0.12	1.81	4.29	0.38	1.03	8.28	1.39	0
		Am_Tr_019734	791	PNX77888.1_4-coumarate-CoA ligase 9-like protein, partial [Trifolium pratense]	AT5G63380.1_AMP-dependent synthetase and ligase family protein	.	4CL	0	0.363333	0.07	4.33667	0	0	0	0.05	0.56	0.48	0	0.21	0	11.34	0	1.67
		Am_Tr_071668	723	ATY39971.1_4-coumaroyl:CoA-ligase [Astragalus membranaceus]	AT1G20510.1_OPC-8:0 CoA ligase1, GeneName=OPCL1	.	4CL	0.0833333	0.46	0.06	1.14	0	0.25	0	0.34	1.04	0	0	0.18	0	2.07	1.35	0
		Am_Tr_133217	719	PNX71577.1_4-coumarate-CoA ligase 9-like protein, partial [Trifolium pratense]	AT5G63380.1_AMP-dependent synthetase and ligase family protein	IPR000873_AMP-dependent synthetase/ligase	4CL	3.25333	6.65333	5.33	7.23333	2.79	4.84	2.13	8.19	8.15	3.62	3.82	6.87	5.3	7.7	7.55	6.45
		Am_Tr_224661	619	XP_004497538.1_4-coumarate--CoA ligase-like 7 [Cicer arietinum]	AT4G05160.1_AMP-dependent synthetase and ligase family protein	IPR000873_AMP-dependent synthetase/ligase; IPR025110_AMP-binding enzyme, C-terminal domain	4CL	2.70333	0.233333	0	0.213333	0.46	4.57	3.08	0.58	0.12	0	0	0	0	0	0.64	0
		Am_Tr_041484	539	PNX54643.1_4-coumarate-CoA ligase 1-like protein [Trifolium pratense]	AT3G21240.1_4-coumarate:CoA ligase 2, GeneName=4CL2	.	4CL	16.9567	5.63667	18.6867	23.7767	11.25	27.99	11.63	3.46	6.98	6.47	18.47	19.15	18.44	13.95	35.69	21.69
		Am_Tr_224659	537	XP_004497538.1_4-coumarate--CoA ligase-like 7 [Cicer arietinum]	AT4G05160.1_AMP-dependent synthetase and ligase family protein	IPR000873_AMP-dependent synthetase/ligase	4CL	1.57	0.363333	0.236667	0.41	1.69	2.85	0.17	0	0	1.09	0	0	0.71	0.66	0.09	0.48
		Am_Tr_133216	503	KAH1246096.1_4-coumarate--CoA ligase-like 9 [Glycine max]	.	.	4CL	5.32333	6.34	5.63667	8.58333	4.24	8.44	3.29	5.29	10.01	3.72	2.39	8.95	5.57	5.5	11.39	8.86
		Am_Tr_203873	412	AID51448.1_4-coumaroyl:CoA-ligase [Astragalus membranaceus]	AT1G51680.2_4-coumarate:CoA ligase 1, GeneName=4CL1	IPR000873_AMP-dependent synthetase/ligase	4CL	1.16333	0	0	0	3.49	0	0	0	0	0	0	0	0	0	0	0
		Am_Tr_364590	307	XP_026290973.1_4-coumarate--CoA ligase 1-like [Frankliniella occidentalis]	.	IPR000873_AMP-dependent synthetase/ligase	4CL	0	0	1.19333	0	0	0	0	0	0	0	1.67	1.91	0	0	0	0
		Am_Tr_110189	287	MCH98374.1_4-coumarate-CoA ligase-like 9-like [Trifolium medium]	AT1G20510.3_OPC-8:0 CoA ligase1, GeneName=OPCL1	.	4CL	0	0	0	1.21667	0	0	0	0	0	0	0	0	0	3.65	0	0
		Am_Tr_308701	250	KXH47965.1_4-coumarate-CoA ligase [Colletotrichum nymphaeae SA-01]	.	.	4CL	0	1.80333	0	0	0	0	0	0	0	5.41	0	0	0	0	0	0
		Am_Tr_319276	236	XP_033457610.1_4-coumarate-CoA ligase [Dissoconium aciculare CBS 342.82] KAF1820574.1 4-coumarate-CoA ligase [Dissoconium aciculare CBS 342.82]	AT3G21240.1_4-coumarate:CoA ligase 2, GeneName=4CL2	.	4CL	0	2.22333	0	0	0	0	0	0	6.67	0	0	0	0	0	0	0
		Am_Tr_347319	228	XP_004516098.1_4-coumarate--CoA ligase-like 1 [Cicer arietinum]	AT1G62940.1_acyl-CoA synthetase 5, GeneName=ACOS5	.	4CL	0	3.07333	0	0	0	0	0	6.44	0	2.78	0	0	0	0	0	0
		Am_Tr_136232	216	MCH98374.1_4-coumarate-CoA ligase-like 9-like [Trifolium medium]	.	.	4CL	0	0	0	1.37333	0	0	0	0	0	0	0	0	0	4.12	0	0
		Am_Tr_114577	201	AFR37248.1_4-coumarate CoA ligase, partial [Populus trichocarpa]	AT1G51680.2_4-coumarate:CoA ligase 1, GeneName=4CL1	.	4CL	0	0	0	1.74	0	0	0	0	0	0	0	0	0	0	5.22	0
Iso-seq	10	Am_HQ_62204	1748	XP_004493096.1_chalcone synthase [Cicer arietinum]	AT5G13930.1_Chalcone and stilbene synthase family protein, GeneName=TT4	IPR016039_Thiolase-like; IPR001099_Chalcone/stilbene synthase, N-terminal; IPR011141_Polyketide synthase, type III; IPR012328_Chalcone/stilbene synthase, C-terminal	CHS	0	121.383	212.983	7.53	0	0	0	116.1	142.08	105.97	203.47	199.67	235.81	13.76	2.53	6.3
		Am_HQ_65932	1692	ADZ45299.1_chalcone synthase 1 [Astragalus membranaceus]	AT5G13930.1_Chalcone and stilbene synthase family protein, GeneName=TT4	IPR012328_Chalcone/stilbene synthase, C-terminal; IPR016039_Thiolase-like; IPR001099_Chalcone/stilbene synthase, N-terminal	CHS	3.96	0.99	7.62333	1.13	5.73	3.09	3.06	1.39	0.51	1.07	2.89	7.23	12.75	0.8	1.03	1.56
		Am_HQ_68537	1637	ATY39972.1_Chalcone synthase [Astragalus membranaceus]	AT5G13930.1_Chalcone and stilbene synthase family protein, GeneName=TT4	IPR012328_Chalcone/stilbene synthase, C-terminal; IPR016039_Thiolase-like; IPR001099_Chalcone/stilbene synthase, N-terminal	CHS	4.13667	0.33	3.11	0.396667	7.65	2.86	1.9	0.3	0.17	0.52	0.33	3.6	5.4	0.4	0.32	0.47
		Am_HQ_72269	1522	XP_045830180.1_chalcone synthase 1B [Trifolium pratense]	AT5G13930.1_Chalcone and stilbene synthase family protein, GeneName=TT4	IPR016039_Thiolase-like; IPR001099_Chalcone/stilbene synthase, N-terminal; IPR011141_Polyketide synthase, type III; IPR012328_Chalcone/stilbene synthase, C-terminal	CHS	43.2467	64.4833	29.7333	16.2267	20.08	47.96	61.7	50.59	49.98	92.88	23.28	30.71	35.21	11.92	15.36	21.4
		Am_HQ_73797	1503	ADZ45299.1_chalcone synthase 1 [Astragalus membranaceus]	AT5G13930.1_Chalcone and stilbene synthase family protein, GeneName=TT4	IPR001099_Chalcone/stilbene synthase, N-terminal; IPR016039_Thiolase-like; IPR012328_Chalcone/stilbene synthase, C-terminal; IPR011141_Polyketide synthase, type III	CHS	443.283	57.3267	273.873	109.66	350.22	498.74	480.89	29.48	65.71	76.79	236.57	244.37	340.68	94.93	109.28	124.77
		Am_HQ_74424	1478	AFD36435.1_chalcone synthase 1 [Astragalus membranaceus]	AT5G13930.1_Chalcone and stilbene synthase family protein, GeneName=TT4	IPR001099_Chalcone/stilbene synthase, N-terminal; IPR016039_Thiolase-like; IPR011141_Polyketide synthase, type III; IPR012328_Chalcone/stilbene synthase, C-terminal	CHS	116.113	46.7767	46.26	51.52	91.3	161.89	95.15	37.8	35.09	67.44	39.95	32.91	65.92	52.9	35.74	65.92
		Am_HQ_74751	1454	QIM59642.1_chalcone synthase [Astragalus mongholicus]	AT5G13930.1_Chalcone and stilbene synthase family protein, GeneName=TT4	IPR016039_Thiolase-like; IPR011141_Polyketide synthase, type III; IPR001099_Chalcone/stilbene synthase, N-terminal; IPR012328_Chalcone/stilbene synthase, C-terminal	CHS	120.78	92.5333	157.637	58.01	127.26	154.01	81.07	56.87	87.45	133.28	110.94	146.23	215.74	47.88	54.97	71.18
		Am_HQ_76172	1458	ATY39972.1_Chalcone synthase [Astragalus membranaceus]	AT5G13930.1_Chalcone and stilbene synthase family protein, GeneName=TT4	IPR016039_Thiolase-like; IPR011141_Polyketide synthase, type III; IPR012328_Chalcone/stilbene synthase, C-terminal; IPR001099_Chalcone/stilbene synthase, N-terminal	CHS	638.613	219.247	280.193	128.653	730.07	684.46	501.31	231.47	139.93	286.34	184.96	289.55	366.07	110.55	157.72	117.69
		Am_HQ_76757	1409	ADZ45297.1_chalcone synthase 2 [Astragalus membranaceus]	AT5G13930.1_Chalcone and stilbene synthase family protein, GeneName=TT4	IPR001099_Chalcone/stilbene synthase, N-terminal; IPR016039_Thiolase-like; IPR011141_Polyketide synthase, type III; IPR012328_Chalcone/stilbene synthase, C-terminal	CHS	1380.71	18.5167	143.26	58.73	1402.15	1933.13	806.85	12.27	17.71	25.57	142.54	107.22	180.02	50.49	59.44	66.26
		Am_HQ_78631	1383	AID51449.1_chalcone synthase 2 [Astragalus membranaceus]	AT5G13930.1_Chalcone and stilbene synthase family protein, GeneName=TT4	IPR001099_Chalcone/stilbene synthase, N-terminal; IPR011141_Polyketide synthase, type III; IPR012328_Chalcone/stilbene synthase, C-terminal; IPR016039_Thiolase-like	CHS	207.07	2.35	1.77333	4.70333	400.23	160.9	60.08	4.35	2.46	0.24	3.42	1.03	0.87	10.05	2.09	1.97
rnaSPAdes	26	Am_Rn_017175	3582	ADZ45294.1_chalcone synthase 3 [Glycyrrhiza uralensis]	AT5G13930.1_Chalcone and stilbene synthase family protein, GeneName=TT4	.	CHS	1.46667	1.75333	2.23667	1.56	1.82	1.92	0.66	2.01	3.01	0.24	1.89	4.22	0.6	2.76	1.52	0.4
		Am_Rn_019223	3422	XP_013450490.1_chalcone synthase 4 [Medicago truncatula] KEH24518.1 3-ketoacyl-CoA synthase-like protein [Medicago truncatula] RHN49275.1 Chalcone synthase 1 [Medicago truncatula]	AT5G13930.1_Chalcone and stilbene synthase family protein, GeneName=TT4	IPR003855_Potassium transporter	CHS	2.32333	0.373333	0.0766667	0.09	1.54	4.65	0.78	0.64	0.08	0.4	0	0.15	0.08	0.27	0	0
		Am_Rn_019665	3392	ADZ45297.1_chalcone synthase 2 [Astragalus membranaceus]	AT5G13930.1_Chalcone and stilbene synthase family protein, GeneName=TT4	IPR001099_Chalcone/stilbene synthase, N-terminal; IPR016039_Thiolase-like; IPR012328_Chalcone/stilbene synthase, C-terminal	CHS	165.63	13.8333	36.1433	23.3267	170.45	227.98	98.46	11	15.09	15.41	35.57	35.35	37.51	26.29	24.28	19.41
		Am_Rn_034110	2598	AYE88587.1_chalcone synthase [Caragana korshinskii]	AT5G13930.1_Chalcone and stilbene synthase family protein, GeneName=TT4	IPR001099_Chalcone/stilbene synthase, N-terminal; IPR016039_Thiolase-like; IPR012328_Chalcone/stilbene synthase, C-terminal	CHS	0.14	1.49	3.44333	0.38	0	0	0.42	1.42	2.13	0.92	4.27	2.01	4.05	0.63	0.24	0.27
		Am_Rn_034859	2566	TKY62964.1_Chalcone synthase [Spatholobus suberectus]	AT5G13930.1_Chalcone and stilbene synthase family protein, GeneName=TT4	IPR012328_Chalcone/stilbene synthase, C-terminal; IPR016039_Thiolase-like; IPR001099_Chalcone/stilbene synthase, N-terminal; IPR011141_Polyketide synthase, type III	CHS	0	2.43333	2.01	0.0933333	0	0	0	1.92	3.36	2.02	1.55	1.66	2.82	0.14	0	0.14
		Am_Rn_046220	2131	ADZ45299.1_chalcone synthase 1 [Astragalus membranaceus]	AT5G13930.1_Chalcone and stilbene synthase family protein, GeneName=TT4	IPR012328_Chalcone/stilbene synthase, C-terminal; IPR016039_Thiolase-like; IPR001099_Chalcone/stilbene synthase, N-terminal	CHS	3.09	0.87	5.9	0.983333	4.64	2.45	2.18	1.23	0.44	0.94	1.93	5.84	9.93	0.69	0.9	1.36
		Am_Rn_052960	1911	AFD36435.1_chalcone synthase 1 [Astragalus membranaceus]	AT5G13930.1_Chalcone and stilbene synthase family protein, GeneName=TT4	IPR012328_Chalcone/stilbene synthase, C-terminal; IPR016039_Thiolase-like; IPR001099_Chalcone/stilbene synthase, N-terminal	CHS	1.47667	0.88	1.29667	0.186667	2.52	0.87	1.04	0.26	1.69	0.69	0	0.75	3.14	0.56	0	0
		Am_Rn_053989	1877	ADZ45299.1_chalcone synthase 1 [Astragalus membranaceus]	AT5G13930.1_Chalcone and stilbene synthase family protein, GeneName=TT4	IPR016039_Thiolase-like; IPR001099_Chalcone/stilbene synthase, N-terminal; IPR012328_Chalcone/stilbene synthase, C-terminal; IPR011141_Polyketide synthase, type III	CHS	345.997	49.14	205.657	93.9267	289.15	402.53	346.31	26.16	55.12	66.14	155.64	194.01	267.32	80.26	93.49	108.03
		Am_Rn_054104	1874	XP_004493096.1_chalcone synthase [Cicer arietinum]	AT5G13930.1_Chalcone and stilbene synthase family protein, GeneName=TT4	IPR016039_Thiolase-like; IPR001099_Chalcone/stilbene synthase, N-terminal; IPR011141_Polyketide synthase, type III; IPR012328_Chalcone/stilbene synthase, C-terminal	CHS	0	128.343	197.083	7.88333	0	0	0	123.79	147.88	113.36	162.61	199.44	229.2	14.27	2.75	6.63
		Am_Rn_059338	1717	AFD36435.1_chalcone synthase 1 [Astragalus membranaceus]	AT5G13930.1_Chalcone and stilbene synthase family protein, GeneName=TT4	IPR001099_Chalcone/stilbene synthase, N-terminal; IPR016039_Thiolase-like; IPR011141_Polyketide synthase, type III; IPR012328_Chalcone/stilbene synthase, C-terminal	CHS	100.687	45.7467	39.4567	50.6033	84.45	142.48	75.13	37.88	32.54	66.82	29.46	30.73	58.18	50.54	35.89	65.38
		Am_Rn_067016	1505	AEF14414.1_chalcone synthase [Onobrychis viciifolia]	AT5G13930.1_Chalcone and stilbene synthase family protein, GeneName=TT4	IPR011141_Polyketide synthase, type III; IPR001099_Chalcone/stilbene synthase, N-terminal; IPR016039_Thiolase-like; IPR012328_Chalcone/stilbene synthase, C-terminal	CHS	41.7767	69.95	28.76	17.6133	20.38	48.12	56.83	56.37	53.05	100.43	19.76	31.07	35.45	12.5	16.86	23.48
		Am_Rn_081336	1164	ABL14037.1_chalcone synthase 3, partial [Astragalus mongholicus]	AT5G13930.1_Chalcone and stilbene synthase family protein, GeneName=TT4	IPR001099_Chalcone/stilbene synthase, N-terminal; IPR016039_Thiolase-like	CHS	5.39333	1.57667	7.81667	1.58667	12.91	1.48	1.79	2.18	1.02	1.53	1.14	8.66	13.65	1.36	1.41	1.99
		Am_Rn_081929	1151	ABL14037.1_chalcone synthase 3, partial [Astragalus mongholicus]	AT5G13930.1_Chalcone and stilbene synthase family protein, GeneName=TT4	IPR001099_Chalcone/stilbene synthase, N-terminal; IPR016039_Thiolase-like	CHS	3.01667	0.0933333	0	0.313333	7.23	0.94	0.88	0	0.28	0	0	0	0	0.58	0.36	0
		Am_Rn_083078	1127	PNX99106.1_chalcone synthase, partial [Trifolium pratense]	AT5G13930.1_Chalcone and stilbene synthase family protein, GeneName=TT4	.	CHS	7.67	0.883333	2.38667	2.07667	8.5	11.28	3.23	0.87	0.7	1.08	2.52	2.88	1.76	2.25	3.09	0.89
		Am_Rn_083972	1108	AAZ73731.1_chalcone synthase, partial [Astragalus mongholicus] CAJ20138.1 chalcone synthase, partial [Astragalus mongholicus]	AT5G13930.1_Chalcone and stilbene synthase family protein, GeneName=TT4	IPR012328_Chalcone/stilbene synthase, C-terminal; IPR001099_Chalcone/stilbene synthase, N-terminal; IPR016039_Thiolase-like	CHS	552.73	0	30.1533	9.35667	599.41	782.64	276.14	0	0	0	26.3	16.27	47.89	1.61	10.4	16.06
		Am_Rn_084476	1098	ATY39972.1_Chalcone synthase [Astragalus membranaceus]	AT5G13930.1_Chalcone and stilbene synthase family protein, GeneName=TT4	IPR016039_Thiolase-like; IPR012328_Chalcone/stilbene synthase, C-terminal; IPR001099_Chalcone/stilbene synthase, N-terminal	CHS	570.4	220.803	266.037	134.197	688.64	605.96	416.6	232.57	141.31	288.53	174.16	279.61	344.34	113.12	173.39	116.08
		Am_Rn_085936	1069	ABL14037.1_chalcone synthase 3, partial [Astragalus mongholicus]	AT5G13930.1_Chalcone and stilbene synthase family protein, GeneName=TT4	IPR016039_Thiolase-like; IPR001099_Chalcone/stilbene synthase, N-terminal	CHS	1.64667	1.17	5.44	0.876667	1.98	1.39	1.57	1.68	0.9	0.93	1.75	6.69	7.88	0.57	0.93	1.13
		Am_Rn_089014	1010	ABL14037.1_chalcone synthase 3, partial [Astragalus mongholicus]	AT5G13930.1_Chalcone and stilbene synthase family protein, GeneName=TT4	IPR001099_Chalcone/stilbene synthase, N-terminal; IPR016039_Thiolase-like	CHS	10.33	0.223333	4.38667	0.44	18.16	7.84	4.99	0	0	0.67	0.63	3.86	8.67	1.05	0.27	0
		Am_Rn_091935	956	QIM59642.1_chalcone synthase [Astragalus mongholicus]	AT5G13930.1_Chalcone and stilbene synthase family protein, GeneName=TT4	IPR016039_Thiolase-like; IPR012328_Chalcone/stilbene synthase, C-terminal; IPR001099_Chalcone/stilbene synthase, N-terminal	CHS	107.297	85.7367	138.753	59.9667	125.55	133.91	62.43	48.77	82.96	125.48	106.79	132.14	177.33	52.94	57.61	69.35
		Am_Rn_092292	950	AID51449.1_chalcone synthase 2 [Astragalus membranaceus]	AT5G13930.1_Chalcone and stilbene synthase family protein, GeneName=TT4	IPR001099_Chalcone/stilbene synthase, N-terminal; IPR016039_Thiolase-like; IPR012328_Chalcone/stilbene synthase, C-terminal	CHS	178.87	1.9	1.37	4.70333	347.56	130.65	58.4	3.66	1.73	0.31	2.43	1.21	0.47	9.21	2.26	2.64
		Am_Rn_094293	914	ATY39972.1_Chalcone synthase [Astragalus membranaceus]	AT5G13930.1_Chalcone and stilbene synthase family protein, GeneName=TT4	IPR001099_Chalcone/stilbene synthase, N-terminal; IPR016039_Thiolase-like	CHS	419.703	176.863	179.777	97.4633	476.33	482.75	300.03	186.45	109.47	234.67	70.23	210.76	258.34	81.79	114.27	96.33
		Am_Rn_098524	844	AID51449.1_chalcone synthase 2 [Astragalus membranaceus]	AT5G13930.1_Chalcone and stilbene synthase family protein, GeneName=TT4	IPR016039_Thiolase-like; IPR001099_Chalcone/stilbene synthase, N-terminal	CHS	137.107	2.75667	3.81	4.96667	264.78	146.54	0	4.53	3.74	0	2.98	4.3	4.15	11.08	3.82	0
		Am_Rn_098643	842	AID51449.1_chalcone synthase 2 [Astragalus membranaceus]	AT5G13930.1_Chalcone and stilbene synthase family protein, GeneName=TT4	IPR001099_Chalcone/stilbene synthase, N-terminal; IPR016039_Thiolase-like	CHS	112.743	110.107	151.16	59.86	110.89	154.38	72.96	70.27	100.88	159.17	64.4	151.95	237.13	43.47	57.97	78.14
		Am_Rn_100350	816	QHX39740.1_chalcone synthase, partial [Cajanus cajan]	AT5G13930.1_Chalcone and stilbene synthase family protein, GeneName=TT4	IPR016039_Thiolase-like; IPR001099_Chalcone/stilbene synthase, N-terminal	CHS	82.8067	0.7	0.443333	1.84667	158.66	27.8	61.96	0.99	0	1.11	0.93	0	0.4	1.75	0	3.79
		Am_Rn_104546	756	ADZ45297.1_chalcone synthase 2 [Astragalus membranaceus]	AT5G13930.1_Chalcone and stilbene synthase family protein, GeneName=TT4	IPR001099_Chalcone/stilbene synthase, N-terminal; IPR016039_Thiolase-like	CHS	1197.74	18.07	120.183	59.3733	1205.69	1767.32	620.22	11.56	16.7	25.95	80.6	105.88	174.07	46.26	56.66	75.2
		Am_Rn_215946	272	QQP19690.1_chalcone synthase [Diaporthe liquidambaris]	.	.	CHS	0	0	1.58333	0	0	0	0	0	0	0	4.75	0	0	0	0	0
Trinity	25	Am_Tr_130734	3594	ADZ45294.1_chalcone synthase 3 [Glycyrrhiza uralensis]	AT5G13930.1_Chalcone and stilbene synthase family protein, GeneName=TT4	.	CHS	1.2	0.216667	0.613333	0.27	1.64	1.16	0.8	0.4	0	0.25	0.96	0.58	0.3	0.29	0.1	0.42
		Am_Tr_059636	2566	TKY62964.1_Chalcone synthase [Spatholobus suberectus]	AT5G13930.1_Chalcone and stilbene synthase family protein, GeneName=TT4	IPR012328_Chalcone/stilbene synthase, C-terminal; IPR016039_Thiolase-like; IPR001099_Chalcone/stilbene synthase, N-terminal; IPR011141_Polyketide synthase, type III	CHS	0	1.87333	1.54	0.0733333	0	0	0	1.48	2.57	1.57	1.22	1.26	2.14	0.11	0	0.11
		Am_Tr_059637	1874	XP_004493096.1_chalcone synthase [Cicer arietinum]	AT5G13930.1_Chalcone and stilbene synthase family protein, GeneName=TT4	IPR016039_Thiolase-like; IPR001099_Chalcone/stilbene synthase, N-terminal; IPR011141_Polyketide synthase, type III; IPR012328_Chalcone/stilbene synthase, C-terminal	CHS	0	98.97	151.133	6.01	0	0	0	95.38	113.29	88.24	128.16	151.29	173.95	10.94	2.07	5.02
		Am_Tr_049510	1826	AAZ32905.1_chalcone synthase, partial [Medicago sativa]	AT5G13930.1_Chalcone and stilbene synthase family protein, GeneName=TT4	.	CHS	1.61333	0	0	0.0433333	1.48	2.88	0.48	0	0	0	0	0	0	0.13	0	0
		Am_Tr_030719	1718	ATY39972.1_Chalcone synthase [Astragalus membranaceus]	AT5G13930.1_Chalcone and stilbene synthase family protein, GeneName=TT4	IPR001099_Chalcone/stilbene synthase, N-terminal; IPR016039_Thiolase-like; IPR011141_Polyketide synthase, type III; IPR012328_Chalcone/stilbene synthase, C-terminal	CHS	283.503	28.14	110.757	50.9067	252.33	357.22	240.96	10.92	33.65	39.85	72.68	104.18	155.41	43.02	49.51	60.19
		Am_Tr_030716	1693	ATY39972.1_Chalcone synthase [Astragalus membranaceus]	AT5G13930.1_Chalcone and stilbene synthase family protein, GeneName=TT4	IPR016039_Thiolase-like; IPR012328_Chalcone/stilbene synthase, C-terminal; IPR001099_Chalcone/stilbene synthase, N-terminal; IPR011141_Polyketide synthase, type III	CHS	552.72	89.1533	168.013	88.9033	553.52	677.54	427.1	77.24	70.63	119.59	131.76	153.31	218.97	78.37	90.7	97.64
		Am_Tr_030718	1669	QIM59642.1_chalcone synthase [Astragalus mongholicus]	AT5G13930.1_Chalcone and stilbene synthase family protein, GeneName=TT4	IPR012328_Chalcone/stilbene synthase, C-terminal; IPR016039_Thiolase-like; IPR001099_Chalcone/stilbene synthase, N-terminal; IPR011141_Polyketide synthase, type III	CHS	175.34	3.65667	13.98	7.97	206.05	240.19	79.78	3	3.76	4.21	10.48	11.14	20.32	7.7	6.34	9.87
		Am_Tr_034095	1632	XP_045830180.1_chalcone synthase 1B [Trifolium pratense]	AT5G13930.1_Chalcone and stilbene synthase family protein, GeneName=TT4	IPR016039_Thiolase-like; IPR001099_Chalcone/stilbene synthase, N-terminal; IPR011141_Polyketide synthase, type III; IPR012328_Chalcone/stilbene synthase, C-terminal	CHS	36.2333	53.85	21.51	13.1833	17.02	41.19	50.49	42.12	40.57	78.86	14.74	23.51	26.28	9.61	12.52	17.42
		Am_Tr_030717	1535	ATY39972.1_Chalcone synthase [Astragalus membranaceus]	AT5G13930.1_Chalcone and stilbene synthase family protein, GeneName=TT4	IPR016039_Thiolase-like; IPR011141_Polyketide synthase, type III; IPR012328_Chalcone/stilbene synthase, C-terminal; IPR001099_Chalcone/stilbene synthase, N-terminal	CHS	612.687	138.907	163.43	86.1967	689.87	763.83	384.36	132.38	95.21	189.13	87.05	178.35	224.89	74.66	95.6	88.33
		Am_Tr_074322	835	PNX75906.1_chalcone synthase, partial [Trifolium pratense]	AT5G13930.1_Chalcone and stilbene synthase family protein, GeneName=TT4	.	CHS	345.547	6.59667	40.9967	16.9333	372.09	472.32	192.23	6.01	4.98	8.8	47.75	28.07	47.17	14.16	19.03	17.61
		Am_Tr_128009	546	PNX75906.1_chalcone synthase, partial [Trifolium pratense]	AT5G13930.1_Chalcone and stilbene synthase family protein, GeneName=TT4	IPR016039_Thiolase-like; IPR012328_Chalcone/stilbene synthase, C-terminal	CHS	98.5433	23.8133	28.79	24.8067	146.96	92.83	55.84	17.02	20.46	33.96	24.83	29.62	31.92	33.45	19.07	21.9
		Am_Tr_034100	540	ADZ45297.1_chalcone synthase 2 [Astragalus membranaceus]	AT5G13930.1_Chalcone and stilbene synthase family protein, GeneName=TT4	IPR016039_Thiolase-like; IPR001099_Chalcone/stilbene synthase, N-terminal	CHS	285.277	48.4933	74.26	38.98	309.97	398.62	147.24	25.11	42.3	78.07	34.19	69.36	119.23	33.77	31.2	51.97
		Am_Tr_034102	514	ATI97626.1_CHS, partial [Lotus sessilifolius]	AT5G13930.1_Chalcone and stilbene synthase family protein, GeneName=TT4	.	CHS	16.7667	2.62667	13.03	3.75667	14.49	19.87	15.94	1.56	3.24	3.08	6.14	11.53	21.42	3.2	3.27	4.8
		Am_Tr_049514	510	AAZ32905.1_chalcone synthase, partial [Medicago sativa]	AT5G13930.1_Chalcone and stilbene synthase family protein, GeneName=TT4	IPR016039_Thiolase-like; IPR012328_Chalcone/stilbene synthase, C-terminal; IPR001099_Chalcone/stilbene synthase, N-terminal	CHS	350.843	123.073	141.107	69.1067	405.96	378.28	268.29	131.67	69.73	167.82	85.19	158.95	179.18	51.51	89.33	66.48
		Am_Tr_054114	490	P51079.1_RecName: Full=Chalcone synthase 6-4; AltName: Full=Naringenin-chalcone synthase 6-4 [Medicago sativa] AAB41558.1 chalcone synthase, partial [Medicago sativa]	AT5G13930.1_Chalcone and stilbene synthase family protein, GeneName=TT4	IPR016039_Thiolase-like; IPR001099_Chalcone/stilbene synthase, N-terminal; IPR012328_Chalcone/stilbene synthase, C-terminal	CHS	945.267	39.91	132.513	71.43	941.16	1299.12	595.52	29.16	33.57	57	116.08	111.55	169.91	70.73	62.95	80.61
		Am_Tr_054115	480	PNX59440.1_chalcone synthase, partial [Trifolium pratense]	AT5G13930.1_Chalcone and stilbene synthase family protein, GeneName=TT4	.	CHS	102.79	9.65	6.78667	9.82	197.82	73.3	37.25	9.81	7.28	11.86	8.25	3.57	8.54	10.81	8.15	10.5
		Am_Tr_074548	412	PNX69487.1_chalcone synthase [Trifolium pratense]	AT5G13930.1_Chalcone and stilbene synthase family protein, GeneName=TT4	.	CHS	61.8	10.6233	14.7633	13.1	77.82	74.57	33.01	9.98	6.62	15.27	24.73	5.07	14.49	17.88	7.43	13.99
		Am_Tr_034096	327	AAZ73731.1_chalcone synthase, partial [Astragalus mongholicus] CAJ20138.1 chalcone synthase, partial [Astragalus mongholicus]	AT5G13930.1_Chalcone and stilbene synthase family protein, GeneName=TT4	IPR001099_Chalcone/stilbene synthase, N-terminal; IPR016039_Thiolase-like	CHS	87.9367	78.1033	96.2933	39.1967	74.64	138.8	50.37	52.81	72.01	109.49	49.57	99.74	139.57	20.7	41.7	55.19
		Am_Tr_034099	325	PNX63947.1_chalcone synthase, partial [Trifolium pratense]	AT5G13930.1_Chalcone and stilbene synthase family protein, GeneName=TT4	.	CHS	135.093	14.57	23.6067	8.03	260.32	98.59	46.37	11.38	15.38	16.95	21.34	16.11	33.37	6.36	10.91	6.82
		Am_Tr_148152	286	ATI97626.1_CHS, partial [Lotus sessilifolius]	AT5G13930.1_Chalcone and stilbene synthase family protein, GeneName=TT4	.	CHS	1.14667	0	0	0.423333	3.44	0	0	0	0	0	0	0	0	0	1.27	0
		Am_Tr_190871	285	ACO83024.1_chalcone synthase, partial [Trifolium subterraneum]	AT5G13930.1_Chalcone and stilbene synthase family protein, GeneName=TT4	.	CHS	10.03	2.44	1.58	2.09667	7.82	10.51	11.76	2.51	1.5	3.31	0	2.42	2.32	2.49	2.56	1.24
		Am_Tr_148151	275	AAZ32891.1_naringenin-chalcone synthase, partial [Medicago sativa]	AT5G13930.1_Chalcone and stilbene synthase family protein, GeneName=TT4	.	CHS	6.18333	0	1.19333	0.466667	18.55	0	0	0	0	0	3.58	0	0	1.4	0	0
		Am_Tr_377107	272	QQP19690.1_chalcone synthase [Diaporthe liquidambaris]	.	.	CHS	0	0	1.24	0	0	0	0	0	0	0	3.72	0	0	0	0	0
		Am_Tr_109385	232	ATI97626.1_CHS, partial [Lotus sessilifolius]	AT5G13930.1_Chalcone and stilbene synthase family protein, GeneName=TT4	.	CHS	15.62	0.98	2.43667	6.58333	46.86	0	0	2.94	0	0	7.31	0	0	19.75	0	0
		Am_Tr_129504	232	ATI97626.1_CHS, partial [Lotus sessilifolius]	AT5G13930.1_Chalcone and stilbene synthase family protein, GeneName=TT4	.	CHS	204.91	155.473	165.44	77.73	206.23	262.19	146.31	88.27	149.4	228.75	70.69	170.3	255.33	59.26	73.48	100.45
Iso-seq	10	Am_HQ_33325	2396	CAA11226.1_chalcone reductase [Sesbania rostrata]	AT1G59950.1_NAD(P)-linked oxidoreductase superfamily protein	IPR036812_NADP-dependent oxidoreductase domain superfamily; IPR023210_NADP-dependent oxidoreductase domain; IPR020471_Aldo-keto reductase	CHR	0	9.13	1.61667	5.76333	0	0	0	9.01	9.03	9.35	1.19	2.06	1.6	3.72	9.41	4.16
		Am_HQ_53613	1907	CAA11226.1_chalcone reductase [Sesbania rostrata]	AT1G59960.1_NAD(P)-linked oxidoreductase superfamily protein	IPR036812_NADP-dependent oxidoreductase domain superfamily; IPR023210_NADP-dependent oxidoreductase domain; IPR020471_Aldo-keto reductase	CHR	0	3.05667	0.446667	1.82667	0	0	0	3.97	1.81	3.39	0.51	0.36	0.47	1.38	2.62	1.48
		Am_HQ_53662	1944	CAA11226.1_chalcone reductase [Sesbania rostrata]	AT1G59960.1_NAD(P)-linked oxidoreductase superfamily protein	IPR036812_NADP-dependent oxidoreductase domain superfamily; IPR023210_NADP-dependent oxidoreductase domain; IPR020471_Aldo-keto reductase	CHR	0.0766667	7.52667	0.99	5.7	0	0.23	0	7.28	8.45	6.85	1.76	0.35	0.86	3.03	6.98	7.09
		Am_HQ_72927	1539	ATY39973.1_Chalcone reductase [Astragalus membranaceus]	AT1G59960.1_NAD(P)-linked oxidoreductase superfamily protein	IPR036812_NADP-dependent oxidoreductase domain superfamily; IPR020471_Aldo-keto reductase; IPR023210_NADP-dependent oxidoreductase domain	CHR	918.097	63.32	60.7733	111.9	1834.7	676.33	243.26	50.94	69.95	69.07	87.25	30.92	64.15	174.26	75.82	85.62
		Am_HQ_76090	1439	AFC01214.1_chalcone reductase 1 [Astragalus membranaceus]	AT1G59960.1_NAD(P)-linked oxidoreductase superfamily protein	IPR023210_NADP-dependent oxidoreductase domain; IPR036812_NADP-dependent oxidoreductase domain superfamily	CHR	11.5067	6.71	8.52333	4.99333	14.39	12.83	7.3	1.26	8.42	10.45	4.23	11.86	9.48	2	6.45	6.53
		Am_HQ_78778	1373	CAA11226.1_chalcone reductase [Sesbania rostrata]	AT1G59960.1_NAD(P)-linked oxidoreductase superfamily protein	IPR036812_NADP-dependent oxidoreductase domain superfamily; IPR020471_Aldo-keto reductase; IPR023210_NADP-dependent oxidoreductase domain	CHR	0.113333	207.133	69.88	187.023	0	0.34	0	219.84	175.04	226.52	70.13	66.55	72.96	192	152.08	216.99
		Am_HQ_79181	1345	CAA11226.1_chalcone reductase [Sesbania rostrata]	AT1G59960.1_NAD(P)-linked oxidoreductase superfamily protein	IPR020471_Aldo-keto reductase; IPR036812_NADP-dependent oxidoreductase domain superfamily; IPR023210_NADP-dependent oxidoreductase domain	CHR	0	129.263	27.73	119.587	0	0	0	148.62	125.22	113.95	23.98	25.52	33.69	113.68	94.62	150.46
		Am_HQ_80782	1320	AFC01214.1_chalcone reductase 1 [Astragalus membranaceus]	AT1G59960.1_NAD(P)-linked oxidoreductase superfamily protein	IPR036812_NADP-dependent oxidoreductase domain superfamily; IPR020471_Aldo-keto reductase; IPR023210_NADP-dependent oxidoreductase domain	CHR	148.403	194.567	228.957	40.1733	107.89	165.19	172.13	133.61	210.4	239.69	143.72	277.39	265.76	32.51	63.25	24.76
		Am_HQ_81285	1306	AFC01214.1_chalcone reductase 1 [Astragalus membranaceus]	AT1G59960.1_NAD(P)-linked oxidoreductase superfamily protein	IPR023210_NADP-dependent oxidoreductase domain; IPR020471_Aldo-keto reductase; IPR036812_NADP-dependent oxidoreductase domain superfamily	CHR	29.3567	26.9933	21.36	8.21	21.2	48.48	18.39	10.8	33.53	36.65	6.92	23.98	33.18	4.24	13.49	6.9
		Am_HQ_81515	1277	AFC01214.1_chalcone reductase 1 [Astragalus membranaceus]	AT1G59960.1_NAD(P)-linked oxidoreductase superfamily protein	IPR036812_NADP-dependent oxidoreductase domain superfamily; IPR020471_Aldo-keto reductase; IPR023210_NADP-dependent oxidoreductase domain	CHR	371.313	32.9867	28.6867	72.21	9.56	782.69	321.69	0.23	52.25	46.48	0.44	24.77	60.85	2.43	106.75	107.45
rnaSPAdes	7	Am_Rn_050064	2002	AFC01214.1_chalcone reductase 1 [Astragalus membranaceus]	AT1G59960.1_NAD(P)-linked oxidoreductase superfamily protein	IPR023210_NADP-dependent oxidoreductase domain; IPR036812_NADP-dependent oxidoreductase domain superfamily	CHR	15.0767	3	2.56	4.81667	8.98	26.64	9.61	0	3.55	5.45	0.66	2.73	4.29	1.76	6.71	5.98
		Am_Rn_051480	1957	AFC01214.1_chalcone reductase 1 [Astragalus membranaceus]	AT1G59960.1_NAD(P)-linked oxidoreductase superfamily protein	IPR023210_NADP-dependent oxidoreductase domain; IPR036812_NADP-dependent oxidoreductase domain superfamily	CHR	7.78	23.9967	24.59	3.15	9.05	7.08	7.21	11.87	28.93	31.19	12.17	34.01	27.59	2.45	5.62	1.38
		Am_Rn_055530	1830	ATY39973.1_Chalcone reductase [Astragalus membranaceus]	AT1G59960.1_NAD(P)-linked oxidoreductase superfamily protein	IPR020471_Aldo-keto reductase; IPR036812_NADP-dependent oxidoreductase domain superfamily; IPR023210_NADP-dependent oxidoreductase domain	CHR	48.0567	43.3133	39.9567	13.9767	69.19	40.38	34.6	33.91	47.14	48.89	25.87	44.4	49.6	14.41	19.06	8.46
		Am_Rn_059711	1706	ATY39973.1_Chalcone reductase [Astragalus membranaceus]	AT1G59960.1_NAD(P)-linked oxidoreductase superfamily protein	IPR036812_NADP-dependent oxidoreductase domain superfamily; IPR020471_Aldo-keto reductase; IPR023210_NADP-dependent oxidoreductase domain	CHR	948.877	55.8833	44.79	125.617	1650.63	912.27	283.73	35.72	68.31	63.62	48.88	26.57	58.92	149.14	108.02	119.69
		Am_Rn_061346	1661	AFC01214.1_chalcone reductase 1 [Astragalus membranaceus]	AT1G59960.1_NAD(P)-linked oxidoreductase superfamily protein	IPR020471_Aldo-keto reductase; IPR036812_NADP-dependent oxidoreductase domain superfamily; IPR023210_NADP-dependent oxidoreductase domain	CHR	162.503	117.26	116.093	45.1	47.72	286.65	153.14	67.5	132	152.28	54.52	142.28	151.48	17.83	70.59	46.88
		Am_Rn_063625	1597	CAA11226.1_chalcone reductase [Sesbania rostrata]	AT1G59960.1_NAD(P)-linked oxidoreductase superfamily protein	IPR020471_Aldo-keto reductase; IPR023210_NADP-dependent oxidoreductase domain; IPR036812_NADP-dependent oxidoreductase domain superfamily	CHR	0.0366667	263.273	51.5433	218.613	0	0.11	0	289.49	218.26	282.07	54.16	47.28	53.19	228.55	157.82	269.47
		Am_Rn_091563	963	AFC01214.1_chalcone reductase 1 [Astragalus membranaceus]	AT1G59950.1_NAD(P)-linked oxidoreductase superfamily protein	IPR023210_NADP-dependent oxidoreductase domain; IPR036812_NADP-dependent oxidoreductase domain superfamily	CHR	7.53667	2.78	3.03	4.43333	5.97	13.43	3.21	1.2	3.36	3.78	6.61	0.68	1.8	7.15	2.95	3.2
Trinity	7	Am_Tr_054889	2274	CAA11226.1_chalcone reductase [Sesbania rostrata]	AT1G59960.1_NAD(P)-linked oxidoreductase superfamily protein	IPR036812_NADP-dependent oxidoreductase domain superfamily; IPR020471_Aldo-keto reductase; IPR023210_NADP-dependent oxidoreductase domain	CHR	0.116667	0.546667	3.55667	6.62333	0	0.35	0	0.21	1.31	0.12	1.29	5.2	4.18	4.83	5.23	9.81
		Am_Tr_054890	2106	CAA11226.1_chalcone reductase [Sesbania rostrata]	AT1G59950.1_NAD(P)-linked oxidoreductase superfamily protein	IPR020471_Aldo-keto reductase; IPR036812_NADP-dependent oxidoreductase domain superfamily; IPR023210_NADP-dependent oxidoreductase domain	CHR	0	6.02333	0.136667	1.42667	0	0	0	6.27	5.49	6.31	0.35	0.06	0	0.02	2.87	1.39
		Am_Tr_054893	1874	CAA11226.1_chalcone reductase [Sesbania rostrata]	AT1G59960.1_NAD(P)-linked oxidoreductase superfamily protein	IPR036812_NADP-dependent oxidoreductase domain superfamily; IPR020471_Aldo-keto reductase; IPR023210_NADP-dependent oxidoreductase domain	CHR	0	53.1933	9.09333	44.9	0	0	0	62.92	43.96	52.7	10.11	6.7	10.47	42.09	28.65	63.96
		Am_Tr_054883	1645	CAA11226.1_chalcone reductase [Sesbania rostrata]	AT1G59960.1_NAD(P)-linked oxidoreductase superfamily protein	IPR036812_NADP-dependent oxidoreductase domain superfamily; IPR023210_NADP-dependent oxidoreductase domain; IPR020471_Aldo-keto reductase	CHR	0	184.72	47.7933	162.62	0	0	0	196.73	161.1	196.33	40	49.12	54.26	165.49	136.71	185.66
		Am_Tr_000828	1547	ATY39973.1_Chalcone reductase [Astragalus membranaceus]	AT1G59960.1_NAD(P)-linked oxidoreductase superfamily protein	IPR036812_NADP-dependent oxidoreductase domain superfamily; IPR020471_Aldo-keto reductase; IPR023210_NADP-dependent oxidoreductase domain	CHR	616.397	38.16	35.6267	77.22	1148.4	516.54	184.25	25.79	43.41	45.28	50.45	17.72	38.71	114.7	57.33	59.63
		Am_Tr_000827	1346	ATY39973.1_Chalcone reductase [Astragalus membranaceus]	AT1G59960.1_NAD(P)-linked oxidoreductase superfamily protein	IPR036812_NADP-dependent oxidoreductase domain superfamily; IPR020471_Aldo-keto reductase; IPR023210_NADP-dependent oxidoreductase domain	CHR	634	229.17	217.35	110.147	616.15	868.3	417.55	143.95	252.97	290.59	108.29	264.12	279.64	63.75	148.73	117.96
		Am_Tr_114359	359	AFC01214.1_chalcone reductase 1 [Astragalus membranaceus]	AT1G59950.1_NAD(P)-linked oxidoreductase superfamily protein	.	CHR	8.02333	4.19333	2.60333	2.85667	12.27	8.31	3.49	1.3	6.07	5.21	0.55	3.15	4.11	1.31	2.02	5.24
Iso-seq	4	Am_HQ_68604	1620	XP_004502829.1_probable chalcone--flavonone isomerase 3 [Cicer arietinum]	AT5G05270.1_Chalcone-flavanone isomerase family protein, GeneName=CHIL	.	CHI	4.87333	2.17333	4.26333	3.16667	6.29	5.37	2.96	1.7	3.12	1.7	4.19	4	4.6	3.05	4.4	2.05
		Am_HQ_83661	1223	ATY39974.1_Chalcone isomerase [Astragalus membranaceus]	AT3G55120.1_Chalcone-flavanone isomerase family protein, GeneName=TT5	IPR016087_Chalcone isomerase; IPR036298_Chalcone isomerase superfamily	CHI	270.287	127.317	216.67	518.767	175.03	474.48	161.35	63.9	196.97	121.08	195.74	178.09	276.18	421.68	308.26	826.36
		Am_HQ_84333	1128	Q8H0G1.1_RecName: Full=Chalcone--flavanone isomerase 2; Short=Chalcone isomerase 2 [Lotus japonicus] BAC53984.1 putative chalcone isomerase [Lotus japonicus]	AT3G55120.1_Chalcone-flavanone isomerase family protein, GeneName=TT5	IPR036298_Chalcone isomerase superfamily; IPR016087_Chalcone isomerase	CHI	14.47	59.3533	95.2667	87.5133	9.25	28.77	5.39	43.32	72.17	62.57	121.74	78.62	85.44	77.7	74	110.84
		Am_HQ_88756	885	XP_013461511.2_probable chalcone--flavonone isomerase 3 [Medicago truncatula] AFK36813.1 unknown [Medicago truncatula]	AT5G05270.1_Chalcone-flavanone isomerase family protein, GeneName=CHIL	IPR016087_Chalcone isomerase; IPR036298_Chalcone isomerase superfamily	CHI	1485.12	253.877	489.573	356.597	2348.51	979.56	1127.29	221.11	281.66	258.86	503.89	430.75	534.08	345.43	379.33	345.03
rnaSPAdes	12	Am_Rn_005290	5254	ATY39974.1_Chalcone isomerase [Astragalus membranaceus]	AT3G55120.1_Chalcone-flavanone isomerase family protein, GeneName=TT5	IPR036298_Chalcone isomerase superfamily; IPR016087_Chalcone isomerase	CHI	1.13667	1.37	1.31333	2.19667	1.99	1.1	0.32	0.76	2.06	1.29	1.34	1.21	1.39	2.61	1.72	2.26
		Am_Rn_017894	3525	Q8H0G1.1_RecName: Full=Chalcone--flavanone isomerase 2; Short=Chalcone isomerase 2 [Lotus japonicus] BAC53984.1 putative chalcone isomerase [Lotus japonicus]	AT3G55120.1_Chalcone-flavanone isomerase family protein, GeneName=TT5	IPR036298_Chalcone isomerase superfamily; IPR016087_Chalcone isomerase	CHI	0.276667	0.553333	0.636667	2.16	0.42	0.3	0.11	0	1.25	0.41	0.24	0.9	0.77	1.51	1.69	3.28
		Am_Rn_019487	3403	ATY39974.1_Chalcone isomerase [Astragalus membranaceus]	AT3G55120.1_Chalcone-flavanone isomerase family protein, GeneName=TT5	IPR036298_Chalcone isomerase superfamily; IPR016087_Chalcone isomerase	CHI	89.94	66.3367	95.5767	218.013	59.74	161.84	48.24	38.34	94.39	66.28	83.31	85.34	118.08	175.56	138.41	340.07
		Am_Rn_052039	1941	XP_027338628.1_probable chalcone--flavonone isomerase 3 [Abrus precatorius]	AT3G17450.1_hAT dimerization domain-containing protein	.	CHI	1.12333	0.826667	1.64667	1.86333	1.34	1.29	0.74	0.63	1.07	0.78	0.59	2.1	2.25	1.98	1.75	1.86
		Am_Rn_066819	1511	KAG7048029.1_chalcone-flavanone isomerase [Colletotrichum scovillei] KAG7065194.1 chalcone-flavanone isomerase [Colletotrichum scovillei] KAG7067796.1 chalcone-flavanone isomerase [Colletotrichum scovillei]	.	IPR016087_Chalcone isomerase; IPR036298_Chalcone isomerase superfamily	CHI	0	0	1.02333	0.0333333	0	0	0	0	0	0	1.8	0.28	0.99	0	0	0.1
		Am_Rn_069143	1451	XP_004502829.1_probable chalcone--flavonone isomerase 3 [Cicer arietinum]	AT5G05270.1_Chalcone-flavanone isomerase family protein, GeneName=CHIL	.	CHI	2.51333	1.63	2.69	2.15667	4	2.34	1.2	0.96	2.5	1.43	2.83	2.44	2.8	1.54	3.69	1.24
		Am_Rn_082064	1148	XP_013461511.2_probable chalcone--flavonone isomerase 3 [Medicago truncatula] AFK36813.1 unknown [Medicago truncatula]	AT5G05270.1_Chalcone-flavanone isomerase family protein, GeneName=CHIL	IPR016087_Chalcone isomerase; IPR036298_Chalcone isomerase superfamily	CHI	337.35	84.1667	126.167	106.61	543.4	251.72	216.93	75.54	89.03	87.93	100.38	124.67	153.45	90.37	132.27	97.19
		Am_Rn_082130	1147	PNY14782.1_chalcone-flavonone isomerase 2-like protein [Trifolium pratense]	AT1G53520.1_Chalcone-flavanone isomerase family protein, GeneName=FAP3	IPR016087_Chalcone isomerase; IPR036298_Chalcone isomerase superfamily	CHI	0	3.30333	0.666667	0.193333	0	0	0	3	1.91	5	0.66	0.51	0.83	0.36	0	0.22
		Am_Rn_085271	1082	XP_013461511.2_probable chalcone--flavonone isomerase 3 [Medicago truncatula] AFK36813.1 unknown [Medicago truncatula]	AT5G05270.1_Chalcone-flavanone isomerase family protein, GeneName=CHIL	IPR016087_Chalcone isomerase; IPR036298_Chalcone isomerase superfamily	CHI	790.04	136.393	233.22	198.42	1309.19	503.85	557.08	112.7	153.57	142.91	202.89	229.1	267.67	193.65	200.39	201.22
		Am_Rn_087296	1043	PNY14782.1_chalcone-flavonone isomerase 2-like protein [Trifolium pratense]	AT1G53520.1_Chalcone-flavanone isomerase family protein, GeneName=FAP3	IPR036298_Chalcone isomerase superfamily; IPR016087_Chalcone isomerase	CHI	0.0433333	10.15	4.31667	3.66667	0.13	0	0	24.21	4.32	1.92	9.58	1.31	2.06	10.32	0.16	0.52
		Am_Rn_094106	918	XP_046127975.1_chalcone-flavanone isomerase-domain-containing protein [Fusarium solani] KAH7247071.1 chalcone-flavanone isomerase-domain-containing protein [Fusarium solani]	.	IPR036298_Chalcone isomerase superfamily; IPR016087_Chalcone isomerase	CHI	1.06	0	0	0	0	0.15	3.03	0	0	0	0	0	0	0	0	0
		Am_Rn_180514	324	XP_046127975.1_chalcone-flavanone isomerase-domain-containing protein [Fusarium solani] KAH7247071.1 chalcone-flavanone isomerase-domain-containing protein [Fusarium solani]	.	.	CHI	1.15	0	0	0	1.01	0	2.44	0	0	0	0	0	0	0	0	0
Trinity	17	Am_Tr_098395	4105	ATY39974.1_Chalcone isomerase [Astragalus membranaceus]	AT3G55120.1_Chalcone-flavanone isomerase family protein, GeneName=TT5	.	CHI	0.306667	0.253333	0.426667	1.53667	0.35	0.38	0.19	0.1	0.44	0.22	0.37	0.51	0.4	1.72	1.09	1.8
		Am_Tr_098397	3858	ATY39974.1_Chalcone isomerase [Astragalus membranaceus]	AT3G55120.1_Chalcone-flavanone isomerase family protein, GeneName=TT5	IPR016087_Chalcone isomerase; IPR036298_Chalcone isomerase superfamily	CHI	70.4633	34.7667	50.05	131.937	47.45	124.15	39.79	17.93	52.25	34.12	41.01	43.89	65.25	106.52	79.83	209.46
		Am_Tr_109208	2684	XP_045798996.1_fatty-acid-binding protein 1 [Trifolium pratense] PNX92791.1 chalcone-flavonone isomerase-like protein [Trifolium pratense] PNX92800.1 chalcone-flavonone isomerase-like protein [Trifolium pratense]	AT3G63170.1_Chalcone-flavanone isomerase family protein, GeneName=FAP1	IPR016087_Chalcone isomerase; IPR036298_Chalcone isomerase superfamily	CHI	0.846667	1.27333	4.95333	2.26	0.63	0.94	0.97	0.75	1.74	1.33	7.07	4.4	3.39	1.86	2.03	2.89
		Am_Tr_066454	1956	XP_004498865.1_fatty-acid-binding protein 2 [Cicer arietinum]	AT2G26310.1_Chalcone-flavanone isomerase family protein, GeneName=FAP2	IPR016087_Chalcone isomerase; IPR036298_Chalcone isomerase superfamily	CHI	0.9	3.8	0.263333	0.203333	0	2.31	0.39	5.23	0.98	5.19	0	0	0.79	0.61	0	0
		Am_Tr_066445	1870	XP_004498865.1_fatty-acid-binding protein 2 [Cicer arietinum]	AT2G26310.1_Chalcone-flavanone isomerase family protein, GeneName=FAP2	IPR016087_Chalcone isomerase; IPR036298_Chalcone isomerase superfamily	CHI	9.55	14.7333	10.1667	15.23	3.08	18.01	7.56	12.44	17.53	14.23	8.45	12.23	9.82	20.25	10.97	14.47
		Am_Tr_061093	1543	KEH35545.1_chalcone-flavanone isomerase family protein [Medicago truncatula]	AT5G05270.1_Chalcone-flavanone isomerase family protein, GeneName=CHIL	IPR036298_Chalcone isomerase superfamily; IPR016087_Chalcone isomerase	CHI	2.13667	1.95333	1.86667	1.99333	2.41	2.5	1.5	1.08	3.09	1.69	1.82	1.27	2.51	1.69	2.7	1.59
		Am_Tr_006024	1483	Q8H0G1.1_RecName: Full=Chalcone--flavanone isomerase 2; Short=Chalcone isomerase 2 [Lotus japonicus] BAC53984.1 putative chalcone isomerase [Lotus japonicus]	AT3G55120.1_Chalcone-flavanone isomerase family protein, GeneName=TT5	IPR036298_Chalcone isomerase superfamily; IPR016087_Chalcone isomerase	CHI	6.33333	32.9167	44.06	42.7333	2.72	13.83	2.45	24.61	38.6	35.54	50.68	40.46	41.04	36.6	37.85	53.75
		Am_Tr_061092	1305	KEH35546.1_chalcone-flavanone isomerase family protein [Medicago truncatula]	AT5G05270.1_Chalcone-flavanone isomerase family protein, GeneName=CHIL	IPR016087_Chalcone isomerase; IPR036298_Chalcone isomerase superfamily	CHI	2.38667	0.466667	2.02333	1.17667	3.46	2.14	1.56	0.37	0.86	0.17	3.15	1.45	1.47	0.56	1.8	1.17
		Am_Tr_041072	1226	XP_045801107.1_fatty-acid-binding protein 3, chloroplastic [Trifolium pratense]	AT1G53520.1_Chalcone-flavanone isomerase family protein, GeneName=FAP3	IPR036298_Chalcone isomerase superfamily; IPR016087_Chalcone isomerase	CHI	0	12.0267	18.5167	4.59333	0	0	0	6.26	14.32	15.5	20.5	17.2	17.85	2.65	2.52	8.61
		Am_Tr_061094	1211	XP_013461511.2_probable chalcone--flavonone isomerase 3 [Medicago truncatula] AFK36813.1 unknown [Medicago truncatula]	AT5G05270.1_Chalcone-flavanone isomerase family protein, GeneName=CHIL	IPR016087_Chalcone isomerase; IPR036298_Chalcone isomerase superfamily	CHI	936.317	158.1	259.983	215.32	1492.79	630.71	685.45	138.15	170.57	165.58	236.9	245.68	297.37	205.75	230.25	209.96
		Am_Tr_041074	1147	PNY14782.1_chalcone-flavonone isomerase 2-like protein [Trifolium pratense]	AT1G53520.1_Chalcone-flavanone isomerase family protein, GeneName=FAP3	IPR016087_Chalcone isomerase; IPR036298_Chalcone isomerase superfamily	CHI	0	1.66667	0.09	0.0833333	0	0	0	1.96	1	2.04	0.27	0	0	0.25	0	0
		Am_Tr_041071	1043	PNY14782.1_chalcone-flavonone isomerase 2-like protein [Trifolium pratense]	AT1G53520.1_Chalcone-flavanone isomerase family protein, GeneName=FAP3	IPR036298_Chalcone isomerase superfamily; IPR016087_Chalcone isomerase	CHI	0	7.10667	2.76333	2.31667	0	0	0	18.62	2.24	0.46	5.87	0.94	1.48	6.95	0	0
		Am_Tr_041069	1021	PNY14782.1_chalcone-flavonone isomerase 2-like protein [Trifolium pratense]	AT1G53520.1_Chalcone-flavanone isomerase family protein, GeneName=FAP3	IPR016087_Chalcone isomerase; IPR036298_Chalcone isomerase superfamily	CHI	0	1.47667	0.603333	0.52	0	0	0	0.43	0.95	3.05	0.49	0.5	0.82	1.37	0	0.19
		Am_Tr_169330	918	XP_046127975.1_chalcone-flavanone isomerase-domain-containing protein [Fusarium solani] KAH7247071.1 chalcone-flavanone isomerase-domain-containing protein [Fusarium solani]	.	IPR036298_Chalcone isomerase superfamily; IPR016087_Chalcone isomerase	CHI	1.01	0	0	0	0	0.14	2.89	0	0	0	0	0	0	0	0	0
		Am_Tr_129793	882	XP_027338628.1_probable chalcone--flavonone isomerase 3 [Abrus precatorius]	.	.	CHI	0.93	0.49	1.57	1.42667	0.66	1.78	0.35	0.61	0.73	0.13	0	2.49	2.22	1.92	1.34	1.02
		Am_Tr_129800	455	XP_027338628.1_probable chalcone--flavonone isomerase 3 [Abrus precatorius]	.	.	CHI	1.41667	0.763333	0	0	2.97	1.28	0	0	2.29	0	0	0	0	0	0	0
		Am_Tr_255492	324	XP_046127975.1_chalcone-flavanone isomerase-domain-containing protein [Fusarium solani] KAH7247071.1 chalcone-flavanone isomerase-domain-containing protein [Fusarium solani]	.	.	CHI	1.07	0	0	0	0.89	0	2.32	0	0	0	0	0	0	0	0	0
Iso-seq	3	Am_HQ_21462	2763	AEH68209.1_isoflavone synthase [Astragalus mongholicus] AEQ39024.1 isoflavone synthase [Astragalus membranaceus] AEV91333.1 isolfavone synthase 2 [Astragalus mongholicus]	AT5G06900.1_cytochrome P450, family 93, subfamily D, polypeptide 1, GeneName=CYP93D1	IPR002401_Cytochrome P450, E-class, group I; IPR001128_Cytochrome P450; IPR036396_Cytochrome P450 superfamily	IFS	101.747	90.1333	58.12	46.55	45.88	228.98	30.38	70	100.76	99.64	24.01	54.29	96.06	55.17	45.44	39.04
		Am_HQ_41791	2106	AEH68209.1_isoflavone synthase [Astragalus mongholicus] AEQ39024.1 isoflavone synthase [Astragalus membranaceus] AEV91333.1 isolfavone synthase 2 [Astragalus mongholicus]	AT2G45560.1_cytochrome P450, family 76, subfamily C, polypeptide 1, GeneName=CYP76C1	IPR036396_Cytochrome P450 superfamily; IPR001128_Cytochrome P450	IFS	637.51	578.843	412.147	336.973	381.13	1331.12	200.28	438.15	604.03	694.35	272.42	380.41	583.61	393.26	317.37	300.29
		Am_HQ_42345	2178	AFC88270.1_isoflavone synthase 1 [Astragalus membranaceus]	AT3G20960.1_cytochrome P450, family 705, subfamily A, polypeptide 33, GeneName=CYP705A33	IPR001128_Cytochrome P450; IPR036396_Cytochrome P450 superfamily	IFS	257.65	230.527	145.58	122.377	135.02	562.4	75.53	182.63	242.05	266.9	56.69	151.7	228.35	127.97	128.86	110.3
rnaSPAdes	4	Am_Rn_010690	4247	AEH68209.1_isoflavone synthase [Astragalus mongholicus] AEQ39024.1 isoflavone synthase [Astragalus membranaceus] AEV91333.1 isolfavone synthase 2 [Astragalus mongholicus]	AT2G45560.1_cytochrome P450, family 76, subfamily C, polypeptide 1, GeneName=CYP76C1	IPR036396_Cytochrome P450 superfamily; IPR001128_Cytochrome P450	IFS	103.857	111.697	54.4133	57.5133	82.31	199.72	29.54	65.27	129.53	140.29	33	57.69	72.55	65.9	53.05	53.59
		Am_Rn_012564	4020	AEH68209.1_isoflavone synthase [Astragalus mongholicus] AEQ39024.1 isoflavone synthase [Astragalus membranaceus] AEV91333.1 isolfavone synthase 2 [Astragalus mongholicus]	AT5G06900.1_cytochrome P450, family 93, subfamily D, polypeptide 1, GeneName=CYP93D1	IPR001128_Cytochrome P450; IPR036396_Cytochrome P450 superfamily; IPR002401_Cytochrome P450, E-class, group I	IFS	98.5067	82.2233	72.33	59.1167	46.47	222.7	26.35	78.29	62.14	106.24	68.82	53.01	95.16	88.76	51.46	37.13
		Am_Rn_019398	3410	AEH68209.1_isoflavone synthase [Astragalus mongholicus] AEQ39024.1 isoflavone synthase [Astragalus membranaceus] AEV91333.1 isolfavone synthase 2 [Astragalus mongholicus]	AT4G31480.1_Coatomer, beta subunit	IPR001128_Cytochrome P450; IPR002401_Cytochrome P450, E-class, group I; IPR036396_Cytochrome P450 superfamily	IFS	129.243	164.77	146.113	177.38	84.76	212.17	90.8	134.89	177.86	181.56	89.32	172.67	176.35	203.13	166.87	162.14
		Am_Rn_033321	2631	AEH68209.1_isoflavone synthase [Astragalus mongholicus] AEQ39024.1 isoflavone synthase [Astragalus membranaceus] AEV91333.1 isolfavone synthase 2 [Astragalus mongholicus]	AT2G42250.1_cytochrome P450, family 712, subfamily A, polypeptide 1, GeneName=CYP712A1	IPR036396_Cytochrome P450 superfamily; IPR001128_Cytochrome P450; IPR002401_Cytochrome P450, E-class, group I	IFS	348.303	345.573	152.723	86.4667	162.09	845.37	37.45	270.46	365.71	400.55	1.21	144.88	312.08	53.28	112.64	93.48
Trinity	5	Am_Tr_109942	2671	AEH68209.1_isoflavone synthase [Astragalus mongholicus] AEQ39024.1 isoflavone synthase [Astragalus membranaceus] AEV91333.1 isolfavone synthase 2 [Astragalus mongholicus]	AT2G45560.1_cytochrome P450, family 76, subfamily C, polypeptide 1, GeneName=CYP76C1	IPR036396_Cytochrome P450 superfamily; IPR001128_Cytochrome P450	IFS	5.59333	6.31667	3.57667	1.99	10.75	3.06	2.97	3.86	8.41	6.68	4.08	1.94	4.71	2.92	2.01	1.04
		Am_Tr_109934	2550	AEH68209.1_isoflavone synthase [Astragalus mongholicus] AEQ39024.1 isoflavone synthase [Astragalus membranaceus] AEV91333.1 isolfavone synthase 2 [Astragalus mongholicus]	AT5G06900.1_cytochrome P450, family 93, subfamily D, polypeptide 1, GeneName=CYP93D1	IPR002401_Cytochrome P450, E-class, group I; IPR001128_Cytochrome P450; IPR036396_Cytochrome P450 superfamily	IFS	755.867	644.02	394.603	200.717	410.33	1635.72	221.55	502.1	644.85	785.11	196.23	396.05	591.53	357.72	174.41	70.02
		Am_Tr_109939	2298	AFC88270.1_isoflavone synthase 1 [Astragalus membranaceus]	AT2G45560.1_cytochrome P450, family 76, subfamily C, polypeptide 1, GeneName=CYP76C1	IPR001128_Cytochrome P450; IPR002401_Cytochrome P450, E-class, group I; IPR036396_Cytochrome P450 superfamily	IFS	22.3433	3.09333	3.13333	237.5	15	43.67	8.36	0.09	2.81	6.38	2.52	4.73	2.15	161.78	249.24	301.48
		Am_Tr_109935	2284	AEH68209.1_isoflavone synthase [Astragalus mongholicus] AEQ39024.1 isoflavone synthase [Astragalus membranaceus] AEV91333.1 isolfavone synthase 2 [Astragalus mongholicus]	AT5G06900.1_cytochrome P450, family 93, subfamily D, polypeptide 1, GeneName=CYP93D1	IPR001128_Cytochrome P450; IPR036396_Cytochrome P450 superfamily; IPR002401_Cytochrome P450, E-class, group I	IFS	9.02333	36.97	12.04	115.57	6.9	18.84	1.33	23.93	58.28	28.7	0	9.84	26.28	2.96	135.65	208.1
		Am_Tr_109940	2032	AFC88270.1_isoflavone synthase 1 [Astragalus membranaceus]	AT2G45560.1_cytochrome P450, family 76, subfamily C, polypeptide 1, GeneName=CYP76C1	IPR001128_Cytochrome P450; IPR002401_Cytochrome P450, E-class, group I; IPR036396_Cytochrome P450 superfamily	IFS	0	0.263333	0.00333333	3.89667	0	0	0	0.78	0.01	0	0	0	0.01	0.04	1.67	9.98
Iso-seq	3	Am_HQ_79972	1344	Q5NUF4.1_RecName: Full=2-hydroxyisoflavanone dehydratase; AltName: Full=Carboxylesterase HIDM [Glycyrrhiza echinata] BAD80839.1 2-Hydroxyisoflavanone dehydratase [Glycyrrhiza echinata]	AT3G48690.1_alpha/beta-Hydrolases superfamily protein, GeneName=CXE12	IPR013094_Alpha/beta hydrolase fold-3; IPR029058_Alpha/Beta hydrolase fold	2HID	253.15	44.5667	149.153	67.6	249.88	172.08	337.49	28.24	45.85	59.61	103.48	157.99	185.99	70.56	54.04	78.2
		Am_HQ_82955	1232	XP_003610679.2_2-hydroxyisoflavanone dehydratase [Medicago truncatula]	AT1G47480.1_alpha/beta-Hydrolases superfamily protein	IPR013094_Alpha/beta hydrolase fold-3; IPR029058_Alpha/Beta hydrolase fold	2HID	33.09	46.06	23.31	21.98	26.98	42.81	29.48	24.77	51.65	61.76	18.23	23.3	28.4	16.3	22.58	27.06
		Am_HQ_84997	1167	XP_004516320.1_2-hydroxyisoflavanone dehydratase-like [Cicer arietinum]	AT1G19190.1_alpha/beta-Hydrolases superfamily protein	IPR013094_Alpha/beta hydrolase fold-3; IPR029058_Alpha/Beta hydrolase fold	2HID	0.716667	4.89667	18.4833	16.75	0.22	1.75	0.18	3.25	8.55	2.89	40.18	8.88	6.39	24.02	6.76	19.47
rnaSPAdes	3	Am_Rn_050193	1998	Q5NUF4.1_RecName: Full=2-hydroxyisoflavanone dehydratase; AltName: Full=Carboxylesterase HIDM [Glycyrrhiza echinata] BAD80839.1 2-Hydroxyisoflavanone dehydratase [Glycyrrhiza echinata]	AT3G48690.1_alpha/beta-Hydrolases superfamily protein, GeneName=CXE12	IPR013094_Alpha/beta hydrolase fold-3; IPR029058_Alpha/Beta hydrolase fold	2HID	158.27	32.87	97.25	49.4733	165.13	111.86	197.82	20.9	33.29	44.42	57.34	108.99	125.42	50.71	40.16	57.55
		Am_Rn_072537	1368	XP_004516320.1_2-hydroxyisoflavanone dehydratase-like [Cicer arietinum]	AT1G19190.1_alpha/beta-Hydrolases superfamily protein	IPR013094_Alpha/beta hydrolase fold-3; IPR029058_Alpha/Beta hydrolase fold	2HID	0.603333	4.75667	14.5567	16.1733	0.19	1.48	0.14	3.14	8.33	2.8	29.68	8.39	5.6	23.32	6.55	18.65
		Am_Rn_074473	1322	XP_003610679.2_2-hydroxyisoflavanone dehydratase [Medicago truncatula]	AT1G47480.1_alpha/beta-Hydrolases superfamily protein	IPR013094_Alpha/beta hydrolase fold-3; IPR029058_Alpha/Beta hydrolase fold	2HID	29.5533	48.0133	21.31	22.5633	25.02	39.13	24.51	26.07	52.06	65.91	13.85	22.97	27.11	16.94	22.94	27.81
Trinity	5	Am_Tr_080568	1688	Q5NUF4.1_RecName: Full=2-hydroxyisoflavanone dehydratase; AltName: Full=Carboxylesterase HIDM [Glycyrrhiza echinata] BAD80839.1 2-Hydroxyisoflavanone dehydratase [Glycyrrhiza echinata]	AT3G48690.1_alpha/beta-Hydrolases superfamily protein, GeneName=CXE12	IPR013094_Alpha/beta hydrolase fold-3; IPR029058_Alpha/Beta hydrolase fold	2HID	5.77	1.78333	7.27667	2.02667	4.17	2.64	10.5	1.08	1.63	2.64	4.94	6.37	10.52	1.5	2.3	2.28
		Am_Tr_080569	1434	Q5NUF4.1_RecName: Full=2-hydroxyisoflavanone dehydratase; AltName: Full=Carboxylesterase HIDM [Glycyrrhiza echinata] BAD80839.1 2-Hydroxyisoflavanone dehydratase [Glycyrrhiza echinata]	AT3G48690.1_alpha/beta-Hydrolases superfamily protein, GeneName=CXE12	IPR013094_Alpha/beta hydrolase fold-3; IPR029058_Alpha/Beta hydrolase fold	2HID	205.89	35.0233	100.073	52.4133	208	144.86	264.81	22.27	35.41	47.39	60.15	113.28	126.79	54.88	41.45	60.91
		Am_Tr_113029	1335	XP_004516320.1_2-hydroxyisoflavanone dehydratase-like [Cicer arietinum]	AT1G19190.1_alpha/beta-Hydrolases superfamily protein	IPR013094_Alpha/beta hydrolase fold-3; IPR029058_Alpha/Beta hydrolase fold	2HID	0.563333	3.53	11.57	12.0433	0.17	1.38	0.14	2.31	6.57	1.71	23.79	6.55	4.37	16.97	5.08	14.08
		Am_Tr_109045	1264	XP_003610679.2_2-hydroxyisoflavanone dehydratase [Medicago truncatula]	AT1G47480.1_alpha/beta-Hydrolases superfamily protein	IPR013094_Alpha/beta hydrolase fold-3; IPR029058_Alpha/Beta hydrolase fold	2HID	28.8333	40.0733	17.6767	18.4767	24.12	37.04	25.34	21.72	43.48	55.02	12.13	18.65	22.25	13.54	18.83	23.06
		Am_Tr_109046	349	XP_003610679.2_2-hydroxyisoflavanone dehydratase [Medicago truncatula]	.	.	2HID	3.97333	1.40333	0.243333	1.98667	0	11.92	0	0	4.21	0	0	0	0.73	1.29	4.67	0
Iso-seq	6	Am_HQ_64799	1714	Q84KK6.1_RecName: Full=Isoflavone 4&apos;-O-methyltransferase; Short=GeHI4&apos;OMT; AltName: Full=2,7,4&apos;-trihydroxyisoflavanone 4&apos;-O-methyltransferase; AltName: Full=S-adenosyl-L-methionine:2,7,4&apos;-trihydroxyisoflavanone 4&apos;-O-methyltransferase [Glycyrrhiza echinata] BAC58011.1 S-adenosyl-L-methionine: 2,7,4&apos;-trihydroxyisoflavanone 4&apos;-O-methyltransferase [Glycyrrhiza …	AT4G35160.1_O-methyltransferase family protein	IPR001077_O-methyltransferase domain; IPR036390_Winged helix DNA-binding domain superfamily; IPR016461_O-methyltransferase COMT-type; IPR012967_Plant methyltransferase dimerisation; IPR029063_S-adenosyl-L-methionine-dependent methyltransferase	IOMT	195.437	104.01	85.4433	99.7433	193.47	302.93	89.91	60.54	125.74	125.75	39.27	86.08	130.98	98.61	95.81	104.81
		Am_HQ_68183	1648	ATY39976.1_Isoflavone O-methyltransferase [Astragalus membranaceus]	AT4G35160.1_O-methyltransferase family protein	IPR012967_Plant methyltransferase dimerisation; IPR001077_O-methyltransferase domain; IPR029063_S-adenosyl-L-methionine-dependent methyltransferase; IPR036390_Winged helix DNA-binding domain superfamily	IOMT	6.49667	6.97333	3.60333	3.11333	11.06	5.54	2.89	3.73	7.99	9.2	1.53	3.65	5.63	2.08	4.63	2.63
		Am_HQ_69248	1538	ATY39976.1_Isoflavone O-methyltransferase [Astragalus membranaceus]	AT4G35160.1_O-methyltransferase family protein	IPR036390_Winged helix DNA-binding domain superfamily; IPR001077_O-methyltransferase domain; IPR016461_O-methyltransferase COMT-type; IPR029063_S-adenosyl-L-methionine-dependent methyltransferase; IPR012967_Plant methyltransferase dimerisation	IOMT	32.7	87.44	49.2933	17.4667	36.88	34.41	26.81	42.72	86.82	132.78	23.17	63.41	61.3	13.11	21.63	17.66
		Am_HQ_81055	1300	Q84KK6.1_RecName: Full=Isoflavone 4&apos;-O-methyltransferase; Short=GeHI4&apos;OMT; AltName: Full=2,7,4&apos;-trihydroxyisoflavanone 4&apos;-O-methyltransferase; AltName: Full=S-adenosyl-L-methionine:2,7,4&apos;-trihydroxyisoflavanone 4&apos;-O-methyltransferase [Glycyrrhiza echinata] BAC58011.1 S-adenosyl-L-methionine: 2,7,4&apos;-trihydroxyisoflavanone 4&apos;-O-methyltransferase [Glycyrrhiza …	AT4G35160.1_O-methyltransferase family protein	IPR036390_Winged helix DNA-binding domain superfamily; IPR016461_O-methyltransferase COMT-type; IPR029063_S-adenosyl-L-methionine-dependent methyltransferase; IPR001077_O-methyltransferase domain; IPR012967_Plant methyltransferase dimerisation	IOMT	16.13	7.64	16.3833	5.10667	5.93	37.7	4.76	6.66	8.82	7.44	17.95	5.06	26.14	6.11	1.12	8.09
		Am_HQ_81501	1225	ATY39976.1_Isoflavone O-methyltransferase [Astragalus membranaceus]	AT4G35160.1_O-methyltransferase family protein	IPR012967_Plant methyltransferase dimerisation; IPR016461_O-methyltransferase COMT-type; IPR036390_Winged helix DNA-binding domain superfamily; IPR001077_O-methyltransferase domain; IPR029063_S-adenosyl-L-methionine-dependent methyltransferase	IOMT	124.5	184.133	76.6233	94.7067	144.96	104.62	123.92	109.07	184.02	259.31	36.85	94.87	98.15	51.42	135.56	97.14
		Am_HQ_84308	1197	TKY50287.1_Isoflavone 7-O-methyltransferase [Spatholobus suberectus]	AT4G35160.1_O-methyltransferase family protein	IPR001077_O-methyltransferase domain; IPR029063_S-adenosyl-L-methionine-dependent methyltransferase; IPR036390_Winged helix DNA-binding domain superfamily; IPR016461_O-methyltransferase COMT-type; IPR012967_Plant methyltransferase dimerisation	IOMT	0.13	8.57	64.1467	0.563333	0	0.21	0.18	2.31	20.97	2.43	76	54.09	62.35	0.34	0.79	0.56
rnaSPAdes	12	Am_Rn_004574	5462	AID51450.1_isoflavone O-methyltransferase [Astragalus membranaceus]	AT4G35160.1_O-methyltransferase family protein	IPR001077_O-methyltransferase domain; IPR036390_Winged helix DNA-binding domain superfamily; IPR029063_S-adenosyl-L-methionine-dependent methyltransferase; IPR012967_Plant methyltransferase dimerisation	IOMT	1.28333	0.0733333	0.0433333	0.0466667	1.71	1.19	0.95	0.03	0.06	0.13	0	0	0.13	0.07	0	0.07
		Am_Rn_037509	2453	ATY39976.1_Isoflavone O-methyltransferase [Astragalus membranaceus]	AT4G35160.1_O-methyltransferase family protein	IPR012967_Plant methyltransferase dimerisation; IPR001077_O-methyltransferase domain; IPR029063_S-adenosyl-L-methionine-dependent methyltransferase; IPR036390_Winged helix DNA-binding domain superfamily	IOMT	4.70333	5.45333	2.63667	2.68	8.22	3.82	2.07	2.96	5.81	7.59	0.93	2.57	4.41	1.79	3.86	2.39
		Am_Rn_042799	2250	AID51450.1_isoflavone O-methyltransferase [Astragalus membranaceus]	AT4G35160.1_O-methyltransferase family protein	IPR029063_S-adenosyl-L-methionine-dependent methyltransferase; IPR001077_O-methyltransferase domain; IPR036390_Winged helix DNA-binding domain superfamily; IPR012967_Plant methyltransferase dimerisation	IOMT	10.6067	0.276667	0.136667	0.293333	20.2	3.69	7.93	0.51	0.24	0.08	0.05	0.12	0.24	0.56	0	0.32
		Am_Rn_044944	2174	Q84KK6.1_RecName: Full=Isoflavone 4&apos;-O-methyltransferase; Short=GeHI4&apos;OMT; AltName: Full=2,7,4&apos;-trihydroxyisoflavanone 4&apos;-O-methyltransferase; AltName: Full=S-adenosyl-L-methionine:2,7,4&apos;-trihydroxyisoflavanone 4&apos;-O-methyltransferase [Glycyrrhiza echinata] BAC58011.1 S-adenosyl-L-methionine: 2,7,4&apos;-trihydroxyisoflavanone 4&apos;-O-methyltransferase [Glycyrrhiza …	AT4G35160.1_O-methyltransferase family protein	IPR036390_Winged helix DNA-binding domain superfamily; IPR012967_Plant methyltransferase dimerisation; IPR001077_O-methyltransferase domain; IPR029063_S-adenosyl-L-methionine-dependent methyltransferase	IOMT	3.05	1.97333	1.38	1.49	6.82	1.85	0.48	1.2	2.89	1.83	0.73	1.48	1.93	1.24	1.4	1.83
		Am_Rn_047303	2093	Q84KK6.1_RecName: Full=Isoflavone 4&apos;-O-methyltransferase; Short=GeHI4&apos;OMT; AltName: Full=2,7,4&apos;-trihydroxyisoflavanone 4&apos;-O-methyltransferase; AltName: Full=S-adenosyl-L-methionine:2,7,4&apos;-trihydroxyisoflavanone 4&apos;-O-methyltransferase [Glycyrrhiza echinata] BAC58011.1 S-adenosyl-L-methionine: 2,7,4&apos;-trihydroxyisoflavanone 4&apos;-O-methyltransferase [Glycyrrhiza …	AT4G35160.1_O-methyltransferase family protein	IPR001077_O-methyltransferase domain; IPR036390_Winged helix DNA-binding domain superfamily; IPR016461_O-methyltransferase COMT-type; IPR012967_Plant methyltransferase dimerisation; IPR029063_S-adenosyl-L-methionine-dependent methyltransferase	IOMT	156.09	95.0167	69.8367	90.7767	155.36	246.93	65.98	55.64	112.81	116.6	26.7	73.53	109.28	88.2	88.59	95.54
		Am_Rn_049748	2013	Q84KK5.1_RecName: Full=Isoflavone 7-O-methyltransferase; AltName: Full=Daidzein 7-O-methyltransferase [Glycyrrhiza echinata] BAC58012.1 S-adenosyl-L-methionine: daidzein 7-0-methyltransferase [Glycyrrhiza echinata]	AT5G54160.1_O-methyltransferase 1, GeneName=OMT1	IPR029063_S-adenosyl-L-methionine-dependent methyltransferase; IPR036390_Winged helix DNA-binding domain superfamily; IPR001077_O-methyltransferase domain; IPR012967_Plant methyltransferase dimerisation	IOMT	19.45	63.21	32.2933	13.05	23.27	21.25	13.83	31.36	62.63	95.64	11.99	43.91	40.98	9.45	16.79	12.91
		Am_Rn_050644	1984	ATY39976.1_Isoflavone O-methyltransferase [Astragalus membranaceus]	AT4G35160.1_O-methyltransferase family protein	IPR012967_Plant methyltransferase dimerisation; IPR016461_O-methyltransferase COMT-type; IPR036390_Winged helix DNA-binding domain superfamily; IPR001077_O-methyltransferase domain; IPR029063_S-adenosyl-L-methionine-dependent methyltransferase	IOMT	73.3267	131.727	49.75	64.4933	88.06	64.14	67.78	77.66	127.71	189.81	19.94	64.31	65	34.2	93	66.28
		Am_Rn_059114	1724	MCI01803.1_isoflavone-7-O-methyltransferase [Trifolium medium]	.	.	IOMT	1.21	0.76	0.74	0.683333	1.6	1.49	0.54	0.56	1.72	0	1.35	0.87	0	0.5	1.47	0.08
		Am_Rn_059524	1712	RHN44412.1_Isoflavone 7-O-methyltransferase [Medicago truncatula]	AT4G35150.1_O-methyltransferase family protein	IPR001077_O-methyltransferase domain; IPR029063_S-adenosyl-L-methionine-dependent methyltransferase	IOMT	0.46	2.61333	1.29	1.10333	0.12	0.7	0.56	0.84	2.61	4.39	1.61	0.97	1.29	0.84	0.71	1.76
		Am_Rn_063748	1594	TKY50287.1_Isoflavone 7-O-methyltransferase [Spatholobus suberectus]	AT4G35160.1_O-methyltransferase family protein	IPR036390_Winged helix DNA-binding domain superfamily; IPR001077_O-methyltransferase domain; IPR012967_Plant methyltransferase dimerisation; IPR029063_S-adenosyl-L-methionine-dependent methyltransferase	IOMT	0	0.176667	1.04	0	0	0	0	0.33	0	0.2	1.18	0.25	1.69	0	0	0
		Am_Rn_064183	1582	Q84KK6.1_RecName: Full=Isoflavone 4&apos;-O-methyltransferase; Short=GeHI4&apos;OMT; AltName: Full=2,7,4&apos;-trihydroxyisoflavanone 4&apos;-O-methyltransferase; AltName: Full=S-adenosyl-L-methionine:2,7,4&apos;-trihydroxyisoflavanone 4&apos;-O-methyltransferase [Glycyrrhiza echinata] BAC58011.1 S-adenosyl-L-methionine: 2,7,4&apos;-trihydroxyisoflavanone 4&apos;-O-methyltransferase [Glycyrrhiza …	AT4G35160.1_O-methyltransferase family protein	IPR016461_O-methyltransferase COMT-type; IPR001077_O-methyltransferase domain; IPR036390_Winged helix DNA-binding domain superfamily; IPR012967_Plant methyltransferase dimerisation; IPR029063_S-adenosyl-L-methionine-dependent methyltransferase	IOMT	12.7333	6.8	12.5033	4.50333	4.91	30	3.29	5.79	7.77	6.84	12.07	4.19	21.25	5.15	1.05	7.31
		Am_Rn_070875	1409	TKY50287.1_Isoflavone 7-O-methyltransferase [Spatholobus suberectus]	AT4G35160.1_O-methyltransferase family protein	IPR001077_O-methyltransferase domain; IPR029063_S-adenosyl-L-methionine-dependent methyltransferase; IPR036390_Winged helix DNA-binding domain superfamily; IPR016461_O-methyltransferase COMT-type; IPR012967_Plant methyltransferase dimerisation	IOMT	0.0466667	8.51333	54.1933	0.533333	0	0	0.14	2.04	21.02	2.48	57.42	50.3	54.86	0.31	0.76	0.53
Trinity	15	Am_Tr_020576	2582	ATY39976.1_Isoflavone O-methyltransferase [Astragalus membranaceus]	AT4G35160.1_O-methyltransferase family protein	IPR001077_O-methyltransferase domain; IPR012967_Plant methyltransferase dimerisation; IPR029063_S-adenosyl-L-methionine-dependent methyltransferase; IPR016461_O-methyltransferase COMT-type; IPR036390_Winged helix DNA-binding domain superfamily	IOMT	1.10667	1.85333	0.62	0.91	0.54	1.32	1.46	2.43	2.29	0.84	0.91	0	0.95	2.16	0	0.57
		Am_Tr_020573	2305	ATY39976.1_Isoflavone O-methyltransferase [Astragalus membranaceus]	AT4G35160.1_O-methyltransferase family protein	IPR012967_Plant methyltransferase dimerisation; IPR001077_O-methyltransferase domain; IPR029063_S-adenosyl-L-methionine-dependent methyltransferase; IPR036390_Winged helix DNA-binding domain superfamily	IOMT	4.52667	4.59333	1.88333	2.15667	7.9	3.53	2.15	2.53	4.53	6.72	0.81	1.59	3.25	1.45	3.09	1.93
		Am_Tr_241115	2292	AEF14418.1_isoflavone O-methyltranferase [Onobrychis viciifolia]	AT4G35160.1_O-methyltransferase family protein	IPR001077_O-methyltransferase domain; IPR029063_S-adenosyl-L-methionine-dependent methyltransferase	IOMT	1.41	2.58667	2.04333	1.08333	2.76	1.47	0	2.08	5.21	0.47	2.24	3.28	0.61	1.19	1.68	0.38
		Am_Tr_148598	2174	Q84KK6.1_RecName: Full=Isoflavone 4&apos;-O-methyltransferase; Short=GeHI4&apos;OMT; AltName: Full=2,7,4&apos;-trihydroxyisoflavanone 4&apos;-O-methyltransferase; AltName: Full=S-adenosyl-L-methionine:2,7,4&apos;-trihydroxyisoflavanone 4&apos;-O-methyltransferase [Glycyrrhiza echinata] BAC58011.1 S-adenosyl-L-methionine: 2,7,4&apos;-trihydroxyisoflavanone 4&apos;-O-methyltransferase [Glycyrrhiza …	AT4G35160.1_O-methyltransferase family protein	IPR036390_Winged helix DNA-binding domain superfamily; IPR012967_Plant methyltransferase dimerisation; IPR001077_O-methyltransferase domain; IPR029063_S-adenosyl-L-methionine-dependent methyltransferase	IOMT	2.71667	1.52667	1.05333	1.13333	6.02	1.67	0.46	0.93	2.22	1.43	0.57	1.12	1.47	0.95	1.06	1.39
		Am_Tr_148597	2093	Q84KK6.1_RecName: Full=Isoflavone 4&apos;-O-methyltransferase; Short=GeHI4&apos;OMT; AltName: Full=2,7,4&apos;-trihydroxyisoflavanone 4&apos;-O-methyltransferase; AltName: Full=S-adenosyl-L-methionine:2,7,4&apos;-trihydroxyisoflavanone 4&apos;-O-methyltransferase [Glycyrrhiza echinata] BAC58011.1 S-adenosyl-L-methionine: 2,7,4&apos;-trihydroxyisoflavanone 4&apos;-O-methyltransferase [Glycyrrhiza …	AT4G35160.1_O-methyltransferase family protein	IPR001077_O-methyltransferase domain; IPR036390_Winged helix DNA-binding domain superfamily; IPR016461_O-methyltransferase COMT-type; IPR012967_Plant methyltransferase dimerisation; IPR029063_S-adenosyl-L-methionine-dependent methyltransferase	IOMT	141.143	73.3667	53.2967	68.9567	137.09	223.12	63.22	42.87	86.43	90.8	21.05	55.78	83.06	67.63	66.71	72.53
		Am_Tr_020574	2072	ATY39976.1_Isoflavone O-methyltransferase [Astragalus membranaceus]	AT4G35160.1_O-methyltransferase family protein	IPR001077_O-methyltransferase domain; IPR012967_Plant methyltransferase dimerisation; IPR029063_S-adenosyl-L-methionine-dependent methyltransferase; IPR016461_O-methyltransferase COMT-type; IPR036390_Winged helix DNA-binding domain superfamily	IOMT	17.8	49.9267	24.2733	8.91	19.38	18.69	15.33	21.73	45.32	82.73	8.02	32.86	31.94	4.6	11.39	10.74
		Am_Tr_020571	1836	ATY39976.1_Isoflavone O-methyltransferase [Astragalus membranaceus]	AT4G35160.1_O-methyltransferase family protein	IPR012967_Plant methyltransferase dimerisation; IPR016461_O-methyltransferase COMT-type; IPR036390_Winged helix DNA-binding domain superfamily; IPR001077_O-methyltransferase domain; IPR029063_S-adenosyl-L-methionine-dependent methyltransferase	IOMT	69.8933	102.943	37.67	52.04	81.49	60.23	67.96	61.1	100.53	147.2	16.07	48.17	48.77	27.82	74.87	53.43
		Am_Tr_020572	1785	AID51450.1_isoflavone O-methyltransferase [Astragalus membranaceus]	AT5G54160.1_O-methyltransferase 1, GeneName=OMT1	.	IOMT	3.87	1.55	0.743333	0.376667	8.11	0.88	2.62	1.89	1	1.76	0.46	0.58	1.19	0.58	0.06	0.49
		Am_Tr_148594	1535	Q84KK6.1_RecName: Full=Isoflavone 4&apos;-O-methyltransferase; Short=GeHI4&apos;OMT; AltName: Full=2,7,4&apos;-trihydroxyisoflavanone 4&apos;-O-methyltransferase; AltName: Full=S-adenosyl-L-methionine:2,7,4&apos;-trihydroxyisoflavanone 4&apos;-O-methyltransferase [Glycyrrhiza echinata] BAC58011.1 S-adenosyl-L-methionine: 2,7,4&apos;-trihydroxyisoflavanone 4&apos;-O-methyltransferase [Glycyrrhiza …	AT4G35160.1_O-methyltransferase family protein	IPR016461_O-methyltransferase COMT-type; IPR001077_O-methyltransferase domain; IPR012967_Plant methyltransferase dimerisation; IPR036390_Winged helix DNA-binding domain superfamily; IPR029063_S-adenosyl-L-methionine-dependent methyltransferase	IOMT	12.1967	5.47667	10.17	3.50667	4.55	28.58	3.46	4.93	6.01	5.49	10.12	3.25	17.14	4.09	0.68	5.75
		Am_Tr_118861	1426	AID51450.1_isoflavone O-methyltransferase [Astragalus membranaceus]	AT4G35160.1_O-methyltransferase family protein	IPR001077_O-methyltransferase domain; IPR036390_Winged helix DNA-binding domain superfamily; IPR029063_S-adenosyl-L-methionine-dependent methyltransferase; IPR012967_Plant methyltransferase dimerisation	IOMT	11.66	0.33	0.18	0.356667	19.39	5.49	10.1	0.54	0.17	0.28	0.07	0	0.47	0.59	0	0.48
		Am_Tr_148267	1311	TKY50287.1_Isoflavone 7-O-methyltransferase [Spatholobus suberectus]	AT4G35160.1_O-methyltransferase family protein	IPR001077_O-methyltransferase domain; IPR029063_S-adenosyl-L-methionine-dependent methyltransferase; IPR036390_Winged helix DNA-binding domain superfamily; IPR016461_O-methyltransferase COMT-type; IPR012967_Plant methyltransferase dimerisation	IOMT	0.0466667	7.23	45.3167	0.383333	0	0	0.14	1.92	17.55	2.22	48.7	41.57	45.68	0.26	0.63	0.26
		Am_Tr_118858	735	AID51450.1_isoflavone O-methyltransferase [Astragalus membranaceus]	AT1G51990.2_O-methyltransferase family protein	IPR001077_O-methyltransferase domain; IPR029063_S-adenosyl-L-methionine-dependent methyltransferase	IOMT	2.06333	0.286667	0.21	0.12	2.25	1.87	2.07	0.18	0.2	0.48	0	0	0.63	0.18	0	0.18
		Am_Tr_148268	710	KYP42011.1_Isoflavone-7-O-methyltransferase 9 [Cajanus cajan]	AT1G62900.1_S-adenosyl-L-methionine-dependent methyltransferases superfamily protein	.	IOMT	0	0.0833333	1.04333	0	0	0	0	0.25	0	0	1.11	0.59	1.43	0	0	0
		Am_Tr_241121	698	ATY39976.1_Isoflavone O-methyltransferase [Astragalus membranaceus]	.	.	IOMT	5.3	15.51	6.95	3.53333	6.19	6.6	3.11	7.23	12.75	26.55	0.99	7.58	12.28	2.83	5.11	2.66
		Am_Tr_148269	426	TKY50287.1_Isoflavone 7-O-methyltransferase [Spatholobus suberectus]	.	.	IOMT	0	0	2.55	0.0933333	0	0	0	0	0	0	4.86	0	2.79	0	0	0.28
Iso-seq	2	Am_HQ_78201	1364	AEF14415.1_flavanone 3-hydroxylase [Onobrychis viciifolia]	AT3G51240.1_flavanone 3-hydroxylase, GeneName=F3H	IPR044861_Isopenicillin N synthase-like, Fe(2+) 2OG dioxygenase domain; IPR026992_Non-haem dioxygenase N-terminal domain	F3H	0	49.6	229.01	7.28	0	0	0	46.97	70.95	30.88	310.62	198	178.41	9.9	0.77	11.17
		Am_HQ_78913	1375	TKY59134.1_Flavanone 3-dioxygenase [Spatholobus suberectus]	AT3G19000.1_2-oxoglutarate (2OG) and Fe(II)-dependent oxygenase superfamily protein	IPR044861_Isopenicillin N synthase-like, Fe(2+) 2OG dioxygenase domain; IPR026992_Non-haem dioxygenase N-terminal domain	F3H	0.476667	16.74	2.72333	2.27333	0.12	0.94	0.37	24.33	21.41	4.48	2.89	3.59	1.69	1.57	4.38	0.87
rnaSPAdes	7	Am_Rn_022006	3236	TKY59134.1_Flavanone 3-dioxygenase [Spatholobus suberectus]	AT3G19000.2_2-oxoglutarate (2OG) and Fe(II)-dependent oxygenase superfamily protein	IPR044861_Isopenicillin N synthase-like, Fe(2+) 2OG dioxygenase domain	F3H	0.0133333	2.42	0.0833333	0.176667	0.04	0	0	2.56	2.52	2.18	0.08	0.17	0	0.13	0.4	0
		Am_Rn_024635	3075	XP_045789962.1_flavanone 3-dioxygenase 2 isoform X2 [Trifolium pratense]	AT1G79760.2_downstream target of AGL15-4, GeneName=DTA4	IPR026992_Non-haem dioxygenase N-terminal domain	F3H	0.05	0.113333	1.50667	1.50333	0	0	0.15	0	0.24	0.1	2.17	0.94	1.41	1.03	1.61	1.87
		Am_Rn_058017	1756	KAE9613458.1_putative flavanone 3-dioxygenase [Lupinus albus]	AT5G20550.1_2-oxoglutarate (2OG) and Fe(II)-dependent oxygenase superfamily protein	IPR026992_Non-haem dioxygenase N-terminal domain	F3H	0.49	2.57	0.0733333	2.58	0.45	0.9	0.12	3.79	2.18	1.74	0.08	0	0.14	3.38	2.48	1.88
		Am_Rn_064879	1562	AEF14415.1_flavanone 3-hydroxylase [Onobrychis viciifolia]	AT3G51240.1_flavanone 3-hydroxylase, GeneName=F3H	IPR044861_Isopenicillin N synthase-like, Fe(2+) 2OG dioxygenase domain; IPR026992_Non-haem dioxygenase N-terminal domain	F3H	0	49.2533	191.17	7.16333	0	0	0	46.88	70.05	30.83	229.4	183.36	160.75	9.59	0.87	11.03
		Am_Rn_072042	1380	XP_004517166.1_flavanone 3-dioxygenase-like [Cicer arietinum]	AT3G19000.2_2-oxoglutarate (2OG) and Fe(II)-dependent oxygenase superfamily protein	IPR026992_Non-haem dioxygenase N-terminal domain	F3H	0.853333	1.62667	1.51667	1.18667	0.31	2.03	0.22	1.28	1.58	2.02	0.65	2.75	1.15	0.34	3.02	0.2
		Am_Rn_087564	1037	PNX57613.1_flavanone 3-hydroxylase [Trifolium pratense]	AT3G51240.2_flavanone 3-hydroxylase, GeneName=F3H	.	F3H	0	0.416667	2.17667	0.253333	0	0	0	0.55	0.21	0.49	3.83	1.08	1.62	0.57	0	0.19
		Am_Rn_119965	585	AGT50307.1_flavanone 3-hydroxylase, partial [Papaver nudicaule]	AT3G51240.1_flavanone 3-hydroxylase, GeneName=F3H	.	F3H	0	0	2.31333	0.343333	0	0	0	0	0	0	6.32	0.32	0.3	0.34	0	0.69
Trinity	7	Am_Tr_103901	1621	XP_004517166.1_flavanone 3-dioxygenase-like [Cicer arietinum]	AT3G19000.2_2-oxoglutarate (2OG) and Fe(II)-dependent oxygenase superfamily protein	IPR026992_Non-haem dioxygenase N-terminal domain	F3H	0.813333	1.08333	1.36333	0.863333	0.53	1.58	0.33	1.04	0.91	1.3	0.9	1.62	1.57	0.32	2.05	0.22
		Am_Tr_110462	1567	AEF14415.1_flavanone 3-hydroxylase [Onobrychis viciifolia]	AT3G51240.1_flavanone 3-hydroxylase, GeneName=F3H	IPR044861_Isopenicillin N synthase-like, Fe(2+) 2OG dioxygenase domain; IPR026992_Non-haem dioxygenase N-terminal domain	F3H	0	37.64	147.277	5.37333	0	0	0	35.9	53.07	23.95	180.53	139.02	122.28	7.29	0.58	8.25
		Am_Tr_110463	1344	PNX57613.1_flavanone 3-hydroxylase [Trifolium pratense]	AT3G51240.2_flavanone 3-hydroxylase, GeneName=F3H	.	F3H	0	0.246667	1.34667	0.156667	0	0	0	0.33	0.12	0.29	2.49	0.62	0.93	0.35	0	0.12
		Am_Tr_065563	1262	TKY59134.1_Flavanone 3-dioxygenase [Spatholobus suberectus]	AT3G19000.2_2-oxoglutarate (2OG) and Fe(II)-dependent oxygenase superfamily protein	IPR026992_Non-haem dioxygenase N-terminal domain	F3H	0	4.87333	0.14	0.0633333	0	0	0	4.37	5.96	4.29	0	0.42	0	0	0	0.19
		Am_Tr_065564	1152	TKY59134.1_Flavanone 3-dioxygenase [Spatholobus suberectus]	AT3G19000.2_2-oxoglutarate (2OG) and Fe(II)-dependent oxygenase superfamily protein	IPR026992_Non-haem dioxygenase N-terminal domain; IPR044861_Isopenicillin N synthase-like, Fe(2+) 2OG dioxygenase domain	F3H	0.0433333	5.49	0.333333	0.236667	0	0.13	0	6.96	2.43	7.08	0.25	0	0.75	0.37	0.34	0
		Am_Tr_030096	633	TKY59134.1_Flavanone 3-dioxygenase [Spatholobus suberectus]	AT3G19000.1_2-oxoglutarate (2OG) and Fe(II)-dependent oxygenase superfamily protein	IPR044861_Isopenicillin N synthase-like, Fe(2+) 2OG dioxygenase domain	F3H	0.02	12.5	2.09667	0.973333	0	0.02	0.04	19.3	14.63	3.57	2.85	2.11	1.33	0.25	1.29	1.38
		Am_Tr_279087	585	AGT50307.1_flavanone 3-hydroxylase, partial [Papaver nudicaule]	AT3G51240.1_flavanone 3-hydroxylase, GeneName=F3H	.	F3H	0	0	1.81667	0.26	0	0	0	0	0	0	4.98	0.25	0.22	0.26	0	0.52
Iso-seq	3	Am_HQ_82005	1280	TKY73761.1_Flavonol synthase/flavanone 3-hydroxylase [Spatholobus suberectus]	AT5G08640.1_flavonol synthase 1, GeneName=FLS1	IPR026992_Non-haem dioxygenase N-terminal domain	FLS	0	8.92333	18.4767	0.103333	0	0	0	10.63	9.26	6.88	31.21	7.44	16.78	0	0.31	0
		Am_HQ_83112	1226	AEF14416.1_flavonol synthase [Onobrychis viciifolia]	AT5G08640.1_flavonol synthase 1, GeneName=FLS1	IPR044861_Isopenicillin N synthase-like, Fe(2+) 2OG dioxygenase domain; IPR026992_Non-haem dioxygenase N-terminal domain	FLS	0.503333	141.187	177.553	12.2567	0	0.21	1.3	123.95	170.45	129.16	240.49	137.3	154.87	15.85	8.23	12.69
		Am_HQ_83674	1205	TKY73761.1_Flavonol synthase/flavanone 3-hydroxylase [Spatholobus suberectus]	AT5G08640.1_flavonol synthase 1, GeneName=FLS1	IPR026992_Non-haem dioxygenase N-terminal domain; IPR044861_Isopenicillin N synthase-like, Fe(2+) 2OG dioxygenase domain	FLS	0	95.7133	278.717	2.97667	0	0	0	109	81.8	96.34	330.99	227.75	277.41	1.34	4.71	2.88
rnaSPAdes	7	Am_Rn_013725	3892	XP_013466706.1_flavonol synthase/flavanone 3-hydroxylase [Medicago truncatula] KEH40747.1 gibberellin 2-beta-dioxygenase [Medicago truncatula]	AT3G19000.2_2-oxoglutarate (2OG) and Fe(II)-dependent oxygenase superfamily protein	IPR044861_Isopenicillin N synthase-like, Fe(2+) 2OG dioxygenase domain; IPR026992_Non-haem dioxygenase N-terminal domain	FLS	0.126667	0.41	0.203333	27.4767	0.04	0.23	0.11	0.44	0.46	0.33	0.04	0.29	0.28	15.32	36.7	30.41
		Am_Rn_048342	2058	TKY73761.1_Flavonol synthase/flavanone 3-hydroxylase [Spatholobus suberectus]	AT5G08640.1_flavonol synthase 1, GeneName=FLS1	IPR026992_Non-haem dioxygenase N-terminal domain	FLS	0	5.54333	9.03	0.0766667	0	0	0	5.91	5.95	4.77	13.24	5.6	8.25	0.11	0.12	0
		Am_Rn_050656	1984	AEF14416.1_flavonol synthase [Onobrychis viciifolia]	AT5G08640.1_flavonol synthase 1, GeneName=FLS1	IPR044861_Isopenicillin N synthase-like, Fe(2+) 2OG dioxygenase domain	FLS	0.02	1.09	0.87	0.0433333	0	0	0.06	1.57	1.7	0	0	0.58	2.03	0.13	0	0
		Am_Rn_058219	1750	AEF14416.1_flavonol synthase [Onobrychis viciifolia]	AT5G08640.1_flavonol synthase 1, GeneName=FLS1	IPR044861_Isopenicillin N synthase-like, Fe(2+) 2OG dioxygenase domain; IPR026992_Non-haem dioxygenase N-terminal domain	FLS	0.3	106.923	114.063	9.43667	0	0.14	0.76	92.09	127.98	100.7	136.4	98.32	107.47	11.99	6.45	9.87
		Am_Rn_065503	1545	TKY73761.1_Flavonol synthase/flavanone 3-hydroxylase [Spatholobus suberectus]	AT5G08640.1_flavonol synthase 1, GeneName=FLS1	IPR026992_Non-haem dioxygenase N-terminal domain; IPR044861_Isopenicillin N synthase-like, Fe(2+) 2OG dioxygenase domain	FLS	0	86.1067	213.09	2.6	0	0	0	98.88	73.02	86.42	224.6	187.76	226.91	1.06	4.25	2.49
		Am_Rn_065718	1540	XP_020234569.1_flavonol synthase/flavanone 3-hydroxylase [Cajanus cajan] KYP47876.1 Flavonol synthase/flavanone 3-hydroxylase [Cajanus cajan]	AT3G19000.1_2-oxoglutarate (2OG) and Fe(II)-dependent oxygenase superfamily protein	IPR044861_Isopenicillin N synthase-like, Fe(2+) 2OG dioxygenase domain; IPR026992_Non-haem dioxygenase N-terminal domain	FLS	0.723333	0.186667	0.08	1.88667	0.25	1.61	0.31	0.09	0.31	0.16	0.08	0	0.16	2.08	1.28	2.3
		Am_Rn_093289	932	AEF14416.1_flavonol synthase [Onobrychis viciifolia]	AT5G08640.1_flavonol synthase 1, GeneName=FLS1	IPR026992_Non-haem dioxygenase N-terminal domain	FLS	0.01	3.05667	2.42	0.23	0	0	0.03	9.17	0	0	6.78	0	0.48	0.69	0	0
Trinity	6	Am_Tr_032685	2284	TKY73761.1_Flavonol synthase/flavanone 3-hydroxylase [Spatholobus suberectus]	AT5G08640.1_flavonol synthase 1, GeneName=FLS1	IPR026992_Non-haem dioxygenase N-terminal domain	FLS	0	2.22	3.24	0	0	0	0	3.01	3.65	0	5.86	3.86	0	0	0	0
		Am_Tr_032688	2128	TKY73761.1_Flavonol synthase/flavanone 3-hydroxylase [Spatholobus suberectus]	AT5G08640.1_flavonol synthase 1, GeneName=FLS1	IPR026992_Non-haem dioxygenase N-terminal domain; IPR044861_Isopenicillin N synthase-like, Fe(2+) 2OG dioxygenase domain	FLS	0	1.05	1.97	0.03	0	0	0	0.06	0	3.09	1.82	0	4.09	0.09	0	0
		Am_Tr_032686	1927	TKY73761.1_Flavonol synthase/flavanone 3-hydroxylase [Spatholobus suberectus]	AT5G08640.1_flavonol synthase 1, GeneName=FLS1	IPR026992_Non-haem dioxygenase N-terminal domain	FLS	0	2.86667	5.51333	0.0566667	0	0	0	3.08	1.45	4.07	7.93	0.09	8.52	0	0.17	0
		Am_Tr_032687	1771	TKY73761.1_Flavonol synthase/flavanone 3-hydroxylase [Spatholobus suberectus]	AT5G08640.1_flavonol synthase 1, GeneName=FLS1	IPR026992_Non-haem dioxygenase N-terminal domain; IPR044861_Isopenicillin N synthase-like, Fe(2+) 2OG dioxygenase domain	FLS	0	54.49	135.513	1.69	0	0	0	63.03	46.71	53.73	144.9	121.52	140.12	0.69	2.64	1.74
		Am_Tr_159864	1708	AEF14416.1_flavonol synthase [Onobrychis viciifolia]	AT5G08640.1_flavonol synthase 1, GeneName=FLS1	IPR044861_Isopenicillin N synthase-like, Fe(2+) 2OG dioxygenase domain; IPR026992_Non-haem dioxygenase N-terminal domain	FLS	0.303333	86.0233	91.4567	7.48	0	0.13	0.78	76.21	101.25	80.61	113	76.85	84.52	9.76	4.99	7.69
		Am_Tr_025506	1540	XP_020234569.1_flavonol synthase/flavanone 3-hydroxylase [Cajanus cajan] KYP47876.1 Flavonol synthase/flavanone 3-hydroxylase [Cajanus cajan]	AT3G19000.1_2-oxoglutarate (2OG) and Fe(II)-dependent oxygenase superfamily protein	IPR044861_Isopenicillin N synthase-like, Fe(2+) 2OG dioxygenase domain; IPR026992_Non-haem dioxygenase N-terminal domain	FLS	0.656667	0.193333	0.08	1.43333	0.22	1.46	0.29	0.21	0.24	0.13	0.06	0	0.18	1.59	0.96	1.75
rnaSPAdes	2	Am_Rn_003285	5948	XP_027343301.1_dihydroflavonol 4-reductase-like [Abrus precatorius]	AT2G29400.1_type one protein phosphatase 1, GeneName=TOPP1	.	DFR	2.50333	1.45667	1.44333	2.74	2.72	1.65	3.14	0.71	0.97	2.69	0.79	1.15	2.39	2.32	1.69	4.21
		Am_Rn_030015	2787	AEF14420.1_dihydroflavonol 4-reductase [Onobrychis viciifolia]	AT5G42800.1_dihydroflavonol 4-reductase, GeneName=DFR	IPR036291_NAD(P)-binding domain superfamily; IPR001509_NAD-dependent epimerase/dehydratase	DFR	0.53	1.41	5.37333	5.47	0.58	0.76	0.25	0.44	2.54	1.25	4.35	7.18	4.59	5.39	0.12	10.9
Trinity	3	Am_Tr_143093	1344	AEF14420.1_dihydroflavonol 4-reductase [Onobrychis viciifolia]	AT5G42800.1_dihydroflavonol 4-reductase, GeneName=DFR	IPR036291_NAD(P)-binding domain superfamily; IPR001509_NAD-dependent epimerase/dehydratase	DFR	0.0566667	0.276667	7.56667	7.30333	0	0.17	0	0	0.83	0	6.69	9.76	6.25	7.11	0	14.8
		Am_Tr_068814	607	MCI02260.1_dihydroflavonol-4-reductase [Trifolium medium]	AT5G42800.1_dihydroflavonol 4-reductase, GeneName=DFR	.	DFR	4.65667	4.54	2.48667	5.10667	6.6	2.59	4.78	4.03	6.14	3.45	2.53	2	2.93	7.42	4.74	3.16
		Am_Tr_302384	201	XP_041349320.1_putative dihydroflavonol 4-reductase [Gigantopelta aegis]	.	.	DFR	0	0	5.80667	0	0	0	0	0	0	0	17.42	0	0	0	0	0
Iso-seq	1	Am_HQ_75882	1374	AEF14411.1_anthocyanidin synthase [Onobrychis viciifolia]	AT4G22880.2_leucoanthocyanidin dioxygenase, GeneName=LDOX	IPR044861_Isopenicillin N synthase-like, Fe(2+) 2OG dioxygenase domain; IPR026992_Non-haem dioxygenase N-terminal domain	ANS	0	0.98	45.46	7.49667	0	0	0	0	2.78	0.16	46.78	38.33	51.27	7.72	1.24	13.53
rnaSPAdes	3	Am_Rn_043944	2209	AEF14411.1_anthocyanidin synthase [Onobrychis viciifolia]	AT4G22880.2_leucoanthocyanidin dioxygenase, GeneName=LDOX	IPR026992_Non-haem dioxygenase N-terminal domain	ANS	0	0.166667	1.96667	0.403333	0	0	0	0	0.5	0	0.79	2.49	2.62	0.52	0.34	0.35
		Am_Rn_068830	1459	AEF14411.1_anthocyanidin synthase [Onobrychis viciifolia]	AT4G22880.2_leucoanthocyanidin dioxygenase, GeneName=LDOX	IPR044861_Isopenicillin N synthase-like, Fe(2+) 2OG dioxygenase domain; IPR026992_Non-haem dioxygenase N-terminal domain	ANS	0	0.83	39.3633	7.79667	0	0	0	0	2.49	0	32.32	36.86	48.91	7.8	1.12	14.47
		Am_Rn_084836	1091	AEF14411.1_anthocyanidin synthase [Onobrychis viciifolia]	AT4G22880.2_leucoanthocyanidin dioxygenase, GeneName=LDOX	IPR044861_Isopenicillin N synthase-like, Fe(2+) 2OG dioxygenase domain	ANS	0	0.296667	4.51	0.206667	0	0	0	0	0.64	0.25	9.59	2.2	1.74	0.31	0.31	0
Trinity	3	Am_Tr_104543	2209	AEF14411.1_anthocyanidin synthase [Onobrychis viciifolia]	AT4G22880.2_leucoanthocyanidin dioxygenase, GeneName=LDOX	IPR026992_Non-haem dioxygenase N-terminal domain	ANS	0	0.13	1.5	0.306667	0	0	0	0	0.39	0	0.62	1.89	1.99	0.4	0.25	0.27
		Am_Tr_104544	1459	AEF14411.1_anthocyanidin synthase [Onobrychis viciifolia]	AT4G22880.2_leucoanthocyanidin dioxygenase, GeneName=LDOX	IPR044861_Isopenicillin N synthase-like, Fe(2+) 2OG dioxygenase domain; IPR026992_Non-haem dioxygenase N-terminal domain	ANS	0	0.636667	30.1833	5.93	0	0	0	0	1.91	0	25.47	27.96	37.12	5.98	0.85	10.96
		Am_Tr_104545	1091	AEF14411.1_anthocyanidin synthase [Onobrychis viciifolia]	AT4G22880.2_leucoanthocyanidin dioxygenase, GeneName=LDOX	IPR044861_Isopenicillin N synthase-like, Fe(2+) 2OG dioxygenase domain	ANS	0	0.226667	3.51333	0.16	0	0	0	0	0.49	0.19	7.55	1.67	1.32	0.24	0.24	0

## Sheet: Table S8
Supplementary Table 8. Number and expression values of phenylpropanoid-related unigenes selected by TPM filtering (TPM ≥ 5).
Flatform	Unigene number	Unigene ID	Unigene length	Annotation description			Gene name	Average TPM				Roots			Leaves			Flowers			Stems
				NR blast	Araport11	InterPro		Roots	Leaves	Flowers	Stems	R1	R2	R3	L1	L2	L3	F1	F2	F3	S1	S2	S3
Iso-seq	7	Am_HQ_15428	2930	AID51445.1_phenylalanine ammonia-lyase 2 [Astragalus membranaceus]	AT2G37040.1_PHE ammonia lyase 1, GeneName=PAL1	IPR008948_L-Aspartase-like; IPR005922_Phenylalanine ammonia-lyase; IPR001106_Aromatic amino acid lyase	PAL	11.7833	18.2467	10.7267	24.11	16.77	16.39	2.19	31.95	18.98	3.81	13.97	15.3	2.91	40.33	29.28	2.72
		Am_HQ_15739	2995	AID51446.1_phenylalanine ammonia-lyase 3 [Astragalus membranaceus]	AT2G37040.1_PHE ammonia lyase 1, GeneName=PAL1	IPR005922_Phenylalanine ammonia-lyase; IPR001106_Aromatic amino acid lyase; IPR008948_L-Aspartase-like	PAL	7.95667	5.03667	7.57667	8.66667	6.21	16.72	0.94	2.81	8.8	3.5	11.57	6.79	4.37	15.01	6.76	4.23
		Am_HQ_23823	2675	QDG03197.1_phenylalanine ammonia-lyase [Glycyrrhiza uralensis]	AT3G53260.1_phenylalanine ammonia-lyase 2, GeneName=PAL2	IPR008948_L-Aspartase-like; IPR001106_Aromatic amino acid lyase; IPR005922_Phenylalanine ammonia-lyase	PAL	19.8567	29.9567	102.197	59.7267	10.45	28.75	20.37	29.51	34.01	26.35	83.21	95.1	128.28	60.69	75.95	42.54
		Am_HQ_24424	2667	ATY39966.1_Phenylalanine ammonia lyase 1 [Astragalus membranaceus]	AT2G37040.1_PHE ammonia lyase 1, GeneName=PAL1	IPR001106_Aromatic amino acid lyase; IPR005922_Phenylalanine ammonia-lyase; IPR008948_L-Aspartase-like	PAL	336.82	159.613	191.427	155.383	538.14	274.18	198.14	163.92	149.86	165.06	107.26	204.06	262.96	161	185.1	120.05
		Am_HQ_28347	2567	ATY39968.1_Phenylalanine ammonia lyase 3 [Astragalus membranaceus]	AT2G37040.1_PHE ammonia lyase 1, GeneName=PAL1	IPR005922_Phenylalanine ammonia-lyase; IPR001106_Aromatic amino acid lyase; IPR008948_L-Aspartase-like	PAL	32.7167	67.28	33.9833	78.7933	37.62	33.93	26.6	35.4	97.06	69.38	16.35	36.06	49.54	57.47	116.55	62.36
		Am_HQ_29880	2499	AID51445.1_phenylalanine ammonia-lyase 2 [Astragalus membranaceus]	AT2G37040.1_PHE ammonia lyase 1, GeneName=PAL1	IPR001106_Aromatic amino acid lyase; IPR008948_L-Aspartase-like; IPR005922_Phenylalanine ammonia-lyase	PAL	50.0467	113.613	81.7367	137.967	22.99	66.74	60.41	46.33	119.96	174.55	36.96	77.85	130.4	86.08	151.44	176.38
		Am_HQ_34937	2367	AID51446.1_phenylalanine ammonia-lyase 3 [Astragalus membranaceus]	AT2G37040.1_PHE ammonia lyase 1, GeneName=PAL1	IPR001106_Aromatic amino acid lyase; IPR008948_L-Aspartase-like; IPR005922_Phenylalanine ammonia-lyase	PAL	16.96	17.6767	24.5533	21.9667	4.6	38.08	8.2	2.69	20.1	30.24	7.53	18.21	47.92	12.33	20.28	33.29
rnaSPAdes	8	Am_Rn_009545	4411	ATY39966.1_Phenylalanine ammonia lyase 1 [Astragalus membranaceus]	AT2G37040.1_PHE ammonia lyase 1, GeneName=PAL1	IPR008948_L-Aspartase-like; IPR001106_Aromatic amino acid lyase	PAL	6.34	6.14667	8.71667	9.16667	12.21	2.67	4.14	4.84	6.65	6.95	7.22	8.92	10.01	8.38	8.61	10.51
		Am_Rn_024501	3082	AID51445.1_phenylalanine ammonia-lyase 2 [Astragalus membranaceus]	AT2G37040.1_PHE ammonia lyase 1, GeneName=PAL1	IPR008948_L-Aspartase-like; IPR005922_Phenylalanine ammonia-lyase; IPR001106_Aromatic amino acid lyase	PAL	48.2867	108.657	66.39	137.487	39.51	59.93	45.42	65.84	119.32	140.81	36	68.5	94.67	114.79	165.01	132.66
		Am_Rn_024732	3069	AID51446.1_phenylalanine ammonia-lyase 3 [Astragalus membranaceus]	AT2G37040.1_PHE ammonia lyase 1, GeneName=PAL1	IPR001106_Aromatic amino acid lyase; IPR008948_L-Aspartase-like; IPR005922_Phenylalanine ammonia-lyase	PAL	20.96	22.8267	26	29.3933	10.09	45.93	6.86	6.92	29.76	31.8	14.34	21.78	41.88	27.45	27.79	32.94
		Am_Rn_028045	2887	ATY39966.1_Phenylalanine ammonia lyase 1 [Astragalus membranaceus]	AT2G37040.1_PHE ammonia lyase 1, GeneName=PAL1	IPR001106_Aromatic amino acid lyase; IPR005922_Phenylalanine ammonia-lyase; IPR008948_L-Aspartase-like	PAL	308.083	165.77	176.093	158.873	502.88	255.18	166.19	172.09	152.79	172.43	81.11	197.81	249.36	161.37	193.76	121.49
		Am_Rn_029986	2788	QDG03197.1_phenylalanine ammonia-lyase [Glycyrrhiza uralensis]	AT3G53260.1_phenylalanine ammonia-lyase 2, GeneName=PAL2	IPR008948_L-Aspartase-like; IPR001106_Aromatic amino acid lyase; IPR005922_Phenylalanine ammonia-lyase	PAL	18.8033	32.54	97.6867	64.69	10.31	28.1	18	32.38	36.45	28.79	68.44	97.18	127.44	64.63	84.06	45.38
		Am_Rn_047201	2097	XP_004493977.1_phenylalanine ammonia-lyase 1 [Cicer arietinum]	AT2G37040.1_PHE ammonia lyase 1, GeneName=PAL1	IPR001106_Aromatic amino acid lyase; IPR008948_L-Aspartase-like; IPR005922_Phenylalanine ammonia-lyase	PAL	7.29	18.2933	8.61	21.2233	7.81	7.23	6.83	9.12	25.13	20.63	3.79	9.23	12.81	17.3	29.08	17.29
		Am_Rn_073673	1340	ATY39968.1_Phenylalanine ammonia lyase 3 [Astragalus membranaceus]	AT2G37040.1_PHE ammonia lyase 1, GeneName=PAL1	IPR008948_L-Aspartase-like; IPR001106_Aromatic amino acid lyase; IPR005922_Phenylalanine ammonia-lyase	PAL	30.1267	79.1	37.2467	88.85	33.33	35.91	21.14	36.64	110.95	89.71	8.85	39.01	63.88	50.18	132.72	83.65
		Am_Rn_074293	1326	ATY39967.1_Phenylalanine ammonia lyase 2 [Astragalus membranaceus]	AT2G37040.1_PHE ammonia lyase 1, GeneName=PAL1	IPR001106_Aromatic amino acid lyase; IPR008948_L-Aspartase-like; IPR005922_Phenylalanine ammonia-lyase	PAL	24.1633	79.5133	45.3633	82.6333	12.93	39.89	19.67	50.99	82.48	105.07	9.88	55.8	70.41	44.29	91.31	112.3
Trinity	9	Am_Tr_117304	2000	ATY39966.1_Phenylalanine ammonia lyase 1 [Astragalus membranaceus]	AT2G37040.1_PHE ammonia lyase 1, GeneName=PAL1	IPR008948_L-Aspartase-like; IPR005922_Phenylalanine ammonia-lyase; IPR001106_Aromatic amino acid lyase	PAL	224.23	108.267	105.24	93.3833	362.98	193.32	116.39	110.71	100.69	113.4	29.8	125.86	160.06	84.69	112.62	82.84
		Am_Tr_034988	1811	AID51445.1_phenylalanine ammonia-lyase 2 [Astragalus membranaceus]	AT2G37040.1_PHE ammonia lyase 1, GeneName=PAL1	IPR005922_Phenylalanine ammonia-lyase; IPR001106_Aromatic amino acid lyase; IPR008948_L-Aspartase-like	PAL	70.3367	123.467	83.17	155.433	48	100.72	62.29	70.96	131.88	167.56	49.95	80.49	119.07	135	176.76	154.54
		Am_Tr_054226	1231	ATY39968.1_Phenylalanine ammonia lyase 3 [Astragalus membranaceus]	AT2G37040.1_PHE ammonia lyase 1, GeneName=PAL1	IPR005922_Phenylalanine ammonia-lyase; IPR001106_Aromatic amino acid lyase; IPR008948_L-Aspartase-like	PAL	48.0833	88.2233	50.9567	98.46	44.63	64.23	35.39	46.91	119.24	98.52	22.9	51.19	78.78	77.63	130.04	87.71
		Am_Tr_034983	1087	ATY39967.1_Phenylalanine ammonia lyase 2 [Astragalus membranaceus]	AT2G37040.1_PHE ammonia lyase 1, GeneName=PAL1	IPR001106_Aromatic amino acid lyase; IPR008948_L-Aspartase-like	PAL	37.7267	83.5433	46.5167	97.0833	28.68	56.46	28.04	52.21	95.8	102.62	16.01	57.05	66.49	72.18	118.76	100.31
		Am_Tr_034987	1041	ATY39966.1_Phenylalanine ammonia lyase 1 [Astragalus membranaceus]	AT3G53260.1_phenylalanine ammonia-lyase 2, GeneName=PAL2	IPR001106_Aromatic amino acid lyase; IPR008948_L-Aspartase-like	PAL	404.983	180.047	210.08	191.653	643.71	315.3	255.94	187.33	161.77	191.04	149.02	213.57	267.65	220.51	228.06	126.39
		Am_Tr_117308	984	ATY39968.1_Phenylalanine ammonia lyase 3 [Astragalus membranaceus]	AT2G37040.1_PHE ammonia lyase 1, GeneName=PAL1	IPR008948_L-Aspartase-like; IPR001106_Aromatic amino acid lyase	PAL	19.3633	37.0933	18.69	44.8167	20.39	24.04	13.66	19.92	48.78	42.58	6.04	19.54	30.49	27.61	62.07	44.77
		Am_Tr_034984	956	ATY39967.1_Phenylalanine ammonia lyase 2 [Astragalus membranaceus]	AT2G37040.1_PHE ammonia lyase 1, GeneName=PAL1	IPR001106_Aromatic amino acid lyase; IPR008948_L-Aspartase-like	PAL	27.3033	63.2767	35.09	67.96	19.95	37.98	23.98	37.45	68.96	83.42	7.94	37.51	59.82	37.33	79.7	86.85
		Am_Tr_034986	849	ATY39968.1_Phenylalanine ammonia lyase 3 [Astragalus membranaceus]	AT2G37040.1_PHE ammonia lyase 1, GeneName=PAL1	IPR001106_Aromatic amino acid lyase; IPR008948_L-Aspartase-like	PAL	4.17333	8.46333	3.52	8.18333	5.19	4.41	2.92	4.01	15.26	6.12	0.64	4.08	5.84	3.68	14.03	6.84
		Am_Tr_096852	478	ATY39968.1_Phenylalanine ammonia lyase 3 [Astragalus membranaceus]	AT2G37040.1_PHE ammonia lyase 1, GeneName=PAL1	.	PAL	22.2667	39.5533	17.5367	50.7633	28.08	18.94	19.78	19.74	55.36	43.56	12.17	19.82	20.62	42.86	78.92	30.51
Iso-seq	4	Am_HQ_49575	2030	AID51447.1_cinnamate 4-hydroxylase 2 [Astragalus membranaceus]	AT2G30490.1_cinnamate-4-hydroxylase, GeneName=C4H	IPR036396_Cytochrome P450 superfamily; IPR001128_Cytochrome P450; IPR002401_Cytochrome P450, E-class, group I	C4H	253.367	34.9033	57.6333	148.053	218.91	388.92	152.27	18.57	46.29	39.85	43.02	50.18	79.7	135.84	159.17	149.15
		Am_HQ_54640	1924	AEH68208.1_cinnamate 4-hydroxylase [Astragalus mongholicus]	AT2G30490.1_cinnamate-4-hydroxylase, GeneName=C4H	IPR001128_Cytochrome P450; IPR036396_Cytochrome P450 superfamily; IPR002401_Cytochrome P450, E-class, group I	C4H	6.41667	8.01667	11.1967	4.48333	18.19	1.06	0	21.85	1.67	0.53	30.99	1.49	1.11	10.53	2.2	0.72
		Am_HQ_56959	1855	AEH68208.1_cinnamate 4-hydroxylase [Astragalus mongholicus]	AT2G30490.1_cinnamate-4-hydroxylase, GeneName=C4H	IPR001128_Cytochrome P450; IPR036396_Cytochrome P450 superfamily; IPR002401_Cytochrome P450, E-class, group I	C4H	32.24	54.2467	77.5933	26.11	27.64	41.82	27.26	32.21	64.78	65.75	33.23	93.13	106.42	19.32	22.37	36.64
		Am_HQ_59770	1795	TKY50816.1_trans-cinnamate 4-monooxygenase [Spatholobus suberectus]	AT2G30490.1_cinnamate-4-hydroxylase, GeneName=C4H	IPR002401_Cytochrome P450, E-class, group I; IPR001128_Cytochrome P450; IPR036396_Cytochrome P450 superfamily	C4H	689.267	0.553333	7.17667	8.92333	526.75	857.3	683.75	0.46	0.45	0.75	6.64	6.45	8.44	8.25	4.7	13.82
rnaSPAdes	5	Am_Rn_021865	3244	ATY39969.1_Cinnamate-4-hydroxylase 1 [Astragalus membranaceus]	AT2G30490.1_cinnamate-4-hydroxylase, GeneName=C4H	IPR002401_Cytochrome P450, E-class, group I; IPR001128_Cytochrome P450; IPR036396_Cytochrome P450 superfamily	C4H	5.56	1.32	2.15	7.87333	9.08	4.85	2.75	1.23	0.44	2.29	0.69	1.73	4.03	5.29	6.61	11.72
		Am_Rn_030019	2786	AID51447.1_cinnamate 4-hydroxylase 2 [Astragalus membranaceus]	AT2G30490.1_cinnamate-4-hydroxylase, GeneName=C4H	IPR036396_Cytochrome P450 superfamily; IPR001128_Cytochrome P450; IPR002401_Cytochrome P450, E-class, group I	C4H	175.163	27.3733	38.73	113.73	152.85	276.8	95.84	14.26	36.61	31.25	24.14	36.36	55.69	102.3	126.25	112.64
		Am_Rn_048175	2064	AEH68208.1_cinnamate 4-hydroxylase [Astragalus mongholicus]	AT2G30490.1_cinnamate-4-hydroxylase, GeneName=C4H	IPR001128_Cytochrome P450; IPR036396_Cytochrome P450 superfamily; IPR002401_Cytochrome P450, E-class, group I	C4H	37.04	65.3233	81.33	32.2467	46.7	38.95	25.47	55.76	68.87	71.34	50.98	92.26	100.75	30.2	27.25	39.29
		Am_Rn_052812	1916	TKY50816.1_trans-cinnamate 4-monooxygenase [Spatholobus suberectus]	AT2G30490.1_cinnamate-4-hydroxylase, GeneName=C4H	IPR036396_Cytochrome P450 superfamily; IPR001128_Cytochrome P450; IPR002401_Cytochrome P450, E-class, group I	C4H	16.36	0	0.103333	0.51	23.69	12.44	12.95	0	0	0	0	0.31	0	0	0.42	1.11
		Am_Rn_055170	1841	XP_027366179.1_cytochrome P450 CYP73A100-like [Abrus precatorius]	AT2G30490.1_cinnamate-4-hydroxylase, GeneName=C4H	IPR002401_Cytochrome P450, E-class, group I; IPR001128_Cytochrome P450; IPR036396_Cytochrome P450 superfamily	C4H	633.963	0.403333	6.54333	9.35	500.12	814.8	586.97	0.52	0.28	0.41	5.4	6.25	7.98	9.07	4.45	14.53
Trinity	6	Am_Tr_059710	3360	AID51447.1_cinnamate 4-hydroxylase 2 [Astragalus membranaceus]	AT2G30490.1_cinnamate-4-hydroxylase, GeneName=C4H	IPR002401_Cytochrome P450, E-class, group I; IPR001128_Cytochrome P450; IPR036396_Cytochrome P450 superfamily	C4H	5.16333	1.09667	1.72667	5.37667	7.72	4.61	3.16	1.01	0.82	1.46	0.48	1.53	3.17	3.23	4.22	8.68
		Am_Tr_059711	2741	AID51447.1_cinnamate 4-hydroxylase 2 [Astragalus membranaceus]	AT2G30490.1_cinnamate-4-hydroxylase, GeneName=C4H	IPR036396_Cytochrome P450 superfamily; IPR001128_Cytochrome P450; IPR002401_Cytochrome P450, E-class, group I	C4H	151.967	20.5633	28.4333	83.37	130.8	240.97	84.13	11.13	26.96	23.6	18.64	26.45	40.21	71.28	93.44	85.39
		Am_Tr_059709	2462	XP_031385586.1_trans-cinnamate 4-monooxygenase isoform X2 [Punica granatum]	AT2G30490.1_cinnamate-4-hydroxylase, GeneName=C4H	IPR001128_Cytochrome P450; IPR036396_Cytochrome P450 superfamily; IPR002401_Cytochrome P450, E-class, group I	C4H	12.13	1.18667	2.56667	5.80667	8.3	16.51	11.58	0	1.98	1.58	1.62	2.25	3.83	11.23	4.2	1.99
		Am_Tr_003806	2020	AEH68208.1_cinnamate 4-hydroxylase [Astragalus mongholicus]	AT2G30490.1_cinnamate-4-hydroxylase, GeneName=C4H	IPR001128_Cytochrome P450; IPR036396_Cytochrome P450 superfamily; IPR002401_Cytochrome P450, E-class, group I	C4H	32.09	49.8	62.2567	24.0433	39.03	35.21	22.03	43.56	51.51	54.33	40.05	69.89	76.83	23.52	19.81	28.8
		Am_Tr_174436	1942	XP_027934411.1_cytochrome P450 CYP73A100-like [Vigna unguiculata] QCE08638.1 trans-cinnamate 4-monooxygenase [Vigna unguiculata]	AT2G30490.1_cinnamate-4-hydroxylase, GeneName=C4H	IPR036396_Cytochrome P450 superfamily; IPR001128_Cytochrome P450; IPR002401_Cytochrome P450, E-class, group I	C4H	20.3267	0	0.106667	0.45	30.49	13.43	17.06	0	0	0	0	0.32	0	0	0.29	1.06
		Am_Tr_174435	1827	TKY50816.1_trans-cinnamate 4-monooxygenase [Spatholobus suberectus]	AT2G30490.1_cinnamate-4-hydroxylase, GeneName=C4H	IPR002401_Cytochrome P450, E-class, group I; IPR001128_Cytochrome P450; IPR036396_Cytochrome P450 superfamily	C4H	598.81	0.49	5.37333	7.22667	447.88	768.86	579.69	0.4	0.39	0.68	4.52	4.93	6.67	7.02	3.83	10.83
Iso-seq	18	Am_HQ_13075	2974	QDG03189.1_4-coumarate:CoA ligase [Glycyrrhiza uralensis]	AT3G21240.1_4-coumarate:CoA ligase 2, GeneName=4CL2	IPR025110_AMP-binding enzyme, C-terminal domain; IPR000873_AMP-dependent synthetase/ligase	4CL	12.8633	11.4467	16.6667	38.5567	5.28	24.39	8.92	5.06	15.84	13.44	18.33	14.13	17.54	32.14	47.04	36.49
		Am_HQ_33841	2401	ATY39971.1_4-coumaroyl:CoA-ligase [Astragalus membranaceus]	AT1G20510.3_OPC-8:0 CoA ligase1, GeneName=OPCL1	IPR000873_AMP-dependent synthetase/ligase	4CL	15.26	31.0767	11.93	29.7433	2.82	5.35	37.61	42.98	1.02	49.23	5.99	0.65	29.15	36.07	0.56	52.6
		Am_HQ_41737	2201	PNX95884.1_4-coumarate CoA ligase, partial [Trifolium pratense]	AT1G51680.2_4-coumarate:CoA ligase 1, GeneName=4CL1	IPR000873_AMP-dependent synthetase/ligase	4CL	19.7767	8.34	12.1333	25.0867	11.16	33.55	14.62	6.07	10.33	8.62	5.55	12.91	17.94	13.81	35.15	26.3
		Am_HQ_42278	2180	XP_004511423.1_4-coumarate--CoA ligase 2 [Cicer arietinum]	AT1G65060.1_4-coumarate:CoA ligase 3, GeneName=4CL3	IPR000873_AMP-dependent synthetase/ligase; IPR025110_AMP-binding enzyme, C-terminal domain	4CL	86.9067	71.64	52.35	49.55	49.12	167.23	44.37	46.05	85.59	83.28	32.44	52.26	72.35	36.15	55.14	57.36
		Am_HQ_44885	2124	XP_004512448.1_4-coumarate--CoA ligase-like 6 isoform X1 [Cicer arietinum]	AT4G19010.1_AMP-dependent synthetase and ligase family protein	IPR000873_AMP-dependent synthetase/ligase; IPR025110_AMP-binding enzyme, C-terminal domain	4CL	1.39	4.87667	7.04	10.2267	0.44	2.77	0.96	3.67	5.87	5.09	5.8	7.18	8.14	9.78	9	11.9
		Am_HQ_45655	2113	QDG03189.1_4-coumarate:CoA ligase [Glycyrrhiza uralensis]	AT3G21240.1_4-coumarate:CoA ligase 2, GeneName=4CL2	IPR025110_AMP-binding enzyme, C-terminal domain; IPR000873_AMP-dependent synthetase/ligase	4CL	111.453	26.59	50.7967	99.16	89.96	159.73	84.67	18.73	33.4	27.64	25.47	59	67.92	61.06	147.18	89.24
		Am_HQ_46786	2088	QDG03189.1_4-coumarate:CoA ligase [Glycyrrhiza uralensis]	AT3G21240.1_4-coumarate:CoA ligase 2, GeneName=4CL2	IPR025110_AMP-binding enzyme, C-terminal domain; IPR000873_AMP-dependent synthetase/ligase	4CL	9.57	3.35333	24.82	13.1033	6.32	14.92	7.47	2.49	3.99	3.58	20.97	26.63	26.86	8.87	19.95	10.49
		Am_HQ_46881	2076	ATY39971.1_4-coumaroyl:CoA-ligase [Astragalus membranaceus]	AT1G20510.1_OPC-8:0 CoA ligase1, GeneName=OPCL1	IPR025110_AMP-binding enzyme, C-terminal domain; IPR000873_AMP-dependent synthetase/ligase	4CL	51.88	79.4667	35.78	95.07	7.43	94.95	53.26	80.66	87.09	70.65	28.35	39.87	39.12	105.96	99.45	79.8
		Am_HQ_47701	2068	XP_045803451.1_4-coumarate--CoA ligase-like 9 [Trifolium pratense]	AT5G63380.1_AMP-dependent synthetase and ligase family protein	IPR000873_AMP-dependent synthetase/ligase; IPR025110_AMP-binding enzyme, C-terminal domain	4CL	7.80667	11.8233	12.0267	14.2967	4.85	10.51	8.06	10.47	14.22	10.78	13.22	12.49	10.37	12.61	16.72	13.56
		Am_HQ_48882	2002	AID51448.1_4-coumaroyl:CoA-ligase [Astragalus membranaceus]	AT3G21240.1_4-coumarate:CoA ligase 2, GeneName=4CL2	IPR000873_AMP-dependent synthetase/ligase; IPR025110_AMP-binding enzyme, C-terminal domain	4CL	30.0833	2.28667	6.53	21.9067	43.6	28.86	17.79	2.13	2.47	2.26	7.17	5.58	6.84	23.86	26.69	15.17
		Am_HQ_54948	1919	TKY54583.1_4-coumarate--CoA ligase 1 [Spatholobus suberectus]	AT1G51680.1_4-coumarate:CoA ligase 1, GeneName=4CL1	IPR000873_AMP-dependent synthetase/ligase; IPR025110_AMP-binding enzyme, C-terminal domain	4CL	0.103333	1.42333	21.75	0.0833333	0	0	0.31	0.67	2.31	1.29	8.69	32.74	23.82	0.06	0.13	0.06
		Am_HQ_59428	1775	XP_004515681.1_4-coumarate--CoA ligase-like 9 [Cicer arietinum]	AT5G63380.1_AMP-dependent synthetase and ligase family protein	IPR025110_AMP-binding enzyme, C-terminal domain; IPR000873_AMP-dependent synthetase/ligase	4CL	0.05	33.0167	2.69	5.64333	0	0.15	0	30.72	34.59	33.74	1.75	2.6	3.72	6.02	4.37	6.54
		Am_HQ_75603	1469	XP_004515681.1_4-coumarate--CoA ligase-like 9 [Cicer arietinum]	AT5G63380.1_AMP-dependent synthetase and ligase family protein	IPR000873_AMP-dependent synthetase/ligase	4CL	2.5	8.96	1.34333	1.57	4.46	0.81	2.23	7.01	12.06	7.81	0.33	1.23	2.47	0.62	2.08	2.01
		Am_HQ_19597	2830	PNX74615.1_4-coumarate-CoA ligase 10-like protein [Trifolium pratense]	AT3G48990.1_AMP-dependent synthetase and ligase family protein, GeneName=AAE3	IPR000873_AMP-dependent synthetase/ligase	4CL	4.74667	11.86	16.4267	1.73333	2.08	6.87	5.29	11.41	14.41	9.76	9.37	16	23.91	2.16	1.95	1.09
		Am_HQ_31440	2456	PNX74615.1_4-coumarate-CoA ligase 10-like protein [Trifolium pratense]	AT3G48990.1_AMP-dependent synthetase and ligase family protein, GeneName=AAE3	.	4CL	28.8833	100.933	79.7033	9.35333	20.04	42.47	24.14	92.85	110.9	99.05	48.98	93.93	96.2	10.84	10.23	6.99
		Am_HQ_35242	2357	PNX71577.1_4-coumarate-CoA ligase 9-like protein, partial [Trifolium pratense]	AT5G63380.1_AMP-dependent synthetase and ligase family protein	IPR000873_AMP-dependent synthetase/ligase	4CL	2.55667	4.72333	5.84333	5.05	1.21	3.4	3.06	4.89	5.16	4.12	4.45	7.82	5.26	4.67	4.9	5.58
		Am_HQ_43470	2078	PNX74615.1_4-coumarate-CoA ligase 10-like protein [Trifolium pratense]	AT3G48990.1_AMP-dependent synthetase and ligase family protein, GeneName=AAE3	.	4CL	15.7467	30.0967	25.8733	6.23	11.71	21.17	14.36	29.27	31.73	29.29	15.42	33.27	28.93	7.12	6.43	5.14
		Am_HQ_50709	1992	PNY17269.1_4-coumarate-CoA ligase 7-like protein [Trifolium pratense]	AT4G05160.1_AMP-dependent synthetase and ligase family protein	IPR025110_AMP-binding enzyme, C-terminal domain; IPR000873_AMP-dependent synthetase/ligase	4CL	14.65	79.98	51.9667	19.9633	6.93	24.18	12.84	79.13	51.64	109.17	35.09	50.76	70.05	23.93	13.11	22.85
rnaSPAdes	17	Am_Rn_002313	6485	PNY17269.1_4-coumarate-CoA ligase 7-like protein [Trifolium pratense]	AT4G05160.1_AMP-dependent synthetase and ligase family protein	IPR000873_AMP-dependent synthetase/ligase; IPR025110_AMP-binding enzyme, C-terminal domain	4CL	3.63	26.7367	15.61	6.06667	0.97	7.03	2.89	26.24	18.05	35.92	8.64	16.65	21.54	7.35	4.63	6.22
		Am_Rn_008298	4609	PNX74615.1_4-coumarate-CoA ligase 10-like protein [Trifolium pratense]	AT3G48990.1_AMP-dependent synthetase and ligase family protein, GeneName=AAE3	IPR000873_AMP-dependent synthetase/ligase	4CL	3.54333	8.31	10.58	1.09667	2.34	4.81	3.48	7.57	8.57	8.79	5.36	11.17	15.21	1.28	1.24	0.77
		Am_Rn_012986	3972	ATY39971.1_4-coumaroyl:CoA-ligase [Astragalus membranaceus]	AT1G20510.1_OPC-8:0 CoA ligase1, GeneName=OPCL1	IPR025110_AMP-binding enzyme, C-terminal domain; IPR000873_AMP-dependent synthetase/ligase	4CL	13.49	31.4167	13.4533	38.03	1.1	17.95	21.42	32.7	23.06	38.49	13.52	9.81	17.03	43.33	30.94	39.82
		Am_Rn_013340	3933	XP_004515681.1_4-coumarate--CoA ligase-like 9 [Cicer arietinum]	AT5G63380.1_AMP-dependent synthetase and ligase family protein	IPR025110_AMP-binding enzyme, C-terminal domain; IPR000873_AMP-dependent synthetase/ligase	4CL	0.856667	16.7733	1.74	3.25667	1.49	0.4	0.68	15.06	18.25	17.01	0.83	1.74	2.65	2.82	3.01	3.94
		Am_Rn_015230	3750	QDG03189.1_4-coumarate:CoA ligase [Glycyrrhiza uralensis]	AT3G21240.1_4-coumarate:CoA ligase 2, GeneName=4CL2	IPR025110_AMP-binding enzyme, C-terminal domain; IPR000873_AMP-dependent synthetase/ligase	4CL	69.3067	26.6733	44.71	102.853	53.34	105.2	49.38	16.85	31.41	31.76	30.25	48.88	55	74.22	141.23	93.11
		Am_Rn_027231	2932	AID51448.1_4-coumaroyl:CoA-ligase [Astragalus membranaceus]	AT3G21240.1_4-coumarate:CoA ligase 2, GeneName=4CL2	IPR000873_AMP-dependent synthetase/ligase; IPR025110_AMP-binding enzyme, C-terminal domain	4CL	12.7433	0.7	1.61333	9.30333	22.1	10.36	5.77	1.13	0.62	0.35	1.32	2.13	1.39	14.97	8.48	4.46
		Am_Rn_030362	2770	PNX74615.1_4-coumarate-CoA ligase 10-like protein [Trifolium pratense]	AT3G48990.1_AMP-dependent synthetase and ligase family protein, GeneName=AAE3	.	4CL	49.3367	117.637	102.513	14.04	26.5	73.82	47.69	111.04	131.99	109.88	40.05	126.58	140.91	15.5	15.18	11.44
		Am_Rn_033433	2627	AID51448.1_4-coumaroyl:CoA-ligase [Astragalus membranaceus]	AT3G21240.1_4-coumarate:CoA ligase 2, GeneName=4CL2	IPR000873_AMP-dependent synthetase/ligase; IPR025110_AMP-binding enzyme, C-terminal domain	4CL	9.96	1.34667	4.01667	10.38	9.57	12.95	7.36	0.72	1.54	1.78	4.59	2.64	4.82	6.82	15.4	8.92
		Am_Rn_036208	2508	TKY54583.1_4-coumarate--CoA ligase 1 [Spatholobus suberectus]	AT1G51680.1_4-coumarate:CoA ligase 1, GeneName=4CL1	IPR025110_AMP-binding enzyme, C-terminal domain; IPR000873_AMP-dependent synthetase/ligase	4CL	0.0366667	1.14	15.8433	0.0533333	0	0	0.11	0.58	2.03	0.81	5.48	23.37	18.68	0.05	0.11	0
		Am_Rn_037463	2455	XP_004511423.1_4-coumarate--CoA ligase 2 [Cicer arietinum]	AT1G65060.1_4-coumarate:CoA ligase 3, GeneName=4CL3	IPR000873_AMP-dependent synthetase/ligase; IPR025110_AMP-binding enzyme, C-terminal domain	4CL	75.9333	72.4933	46.59	49.2667	42.89	149.32	35.59	47.16	85.64	84.68	24.23	49.14	66.4	35.68	56.12	56
		Am_Rn_040862	2320	ATY39971.1_4-coumaroyl:CoA-ligase [Astragalus membranaceus]	AT1G20510.3_OPC-8:0 CoA ligase1, GeneName=OPCL1	IPR000873_AMP-dependent synthetase/ligase	4CL	33.1467	63.4067	20.9633	62.6033	6.52	51.34	41.58	76.75	46.78	66.69	2.96	20.71	39.22	65.5	47.69	74.62
		Am_Rn_042798	2250	XP_004512448.1_4-coumarate--CoA ligase-like 6 isoform X1 [Cicer arietinum]	AT4G19010.1_AMP-dependent synthetase and ligase family protein	IPR025110_AMP-binding enzyme, C-terminal domain; IPR000873_AMP-dependent synthetase/ligase	4CL	1.21667	5.12333	6.47667	10.9733	0.43	2.39	0.83	4.03	5.87	5.47	4.74	6.89	7.8	10.15	9.82	12.95
		Am_Rn_045123	2168	PNX95884.1_4-coumarate CoA ligase, partial [Trifolium pratense]	AT3G21240.2_4-coumarate:CoA ligase 2, GeneName=4CL2	IPR000873_AMP-dependent synthetase/ligase	4CL	21.93	9.64	14.3367	17.4567	13.65	39.63	12.51	6.72	16.61	5.59	0.57	17.95	24.49	0	30.38	21.99
		Am_Rn_058222	1750	XP_045803451.1_4-coumarate--CoA ligase-like 9 [Trifolium pratense]	AT5G63380.1_AMP-dependent synthetase and ligase family protein	IPR025110_AMP-binding enzyme, C-terminal domain; IPR000873_AMP-dependent synthetase/ligase	4CL	8.83667	17.84	16.37	19.93	5.62	12	8.89	17.08	21.09	15.35	11.47	20.96	16.68	16.81	22.45	20.53
		Am_Rn_060471	1685	PNX95884.1_4-coumarate CoA ligase, partial [Trifolium pratense]	AT1G51680.2_4-coumarate:CoA ligase 1, GeneName=4CL1	IPR000873_AMP-dependent synthetase/ligase	4CL	0.363333	0.39	9.08667	0.676667	0.14	0.95	0	0.15	0.62	0.4	2.66	11.27	13.33	0.31	0.79	0.93
		Am_Rn_084592	1096	PNX77888.1_4-coumarate-CoA ligase 9-like protein, partial [Trifolium pratense]	AT5G63380.1_AMP-dependent synthetase and ligase family protein	.	4CL	1.46333	2.35	2.00333	6.25333	2.93	0.86	0.6	3	1.38	2.67	3.86	0.68	1.47	15.64	1.7	1.42
		Am_Rn_109116	696	PNX77888.1_4-coumarate-CoA ligase 9-like protein, partial [Trifolium pratense]	AT5G63380.1_AMP-dependent synthetase and ligase family protein	IPR000873_AMP-dependent synthetase/ligase; IPR025110_AMP-binding enzyme, C-terminal domain	4CL	8.88	13.0867	15.5333	15.5767	3.77	12.83	10.04	12.4	14.08	12.78	20.93	14.52	11.15	15.8	17.33	13.6
Trinity	20	Am_Tr_015739	4071	PNY17269.1_4-coumarate-CoA ligase 7-like protein [Trifolium pratense]	AT4G05160.1_AMP-dependent synthetase and ligase family protein	IPR000873_AMP-dependent synthetase/ligase; IPR025110_AMP-binding enzyme, C-terminal domain	4CL	7.15333	5.02333	3.43	2.77333	4.03	3.21	14.22	6.94	3.78	4.35	3.91	3.28	3.1	5.26	1.53	1.53
		Am_Tr_015734	3941	PNY17269.1_4-coumarate-CoA ligase 7-like protein [Trifolium pratense]	AT4G05160.1_AMP-dependent synthetase and ligase family protein	IPR000873_AMP-dependent synthetase/ligase; IPR025110_AMP-binding enzyme, C-terminal domain	4CL	23.36	38.2933	26.5133	18.5567	9.71	29.6	30.77	28.37	33.62	52.89	15.38	28.36	35.8	17.41	18.35	19.91
		Am_Tr_041483	3800	QDG03189.1_4-coumarate:CoA ligase [Glycyrrhiza uralensis]	AT3G21240.1_4-coumarate:CoA ligase 2, GeneName=4CL2	IPR000873_AMP-dependent synthetase/ligase; IPR025110_AMP-binding enzyme, C-terminal domain	4CL	73.77	24.5267	42.4533	84.6033	53.65	114.56	53.1	15.75	30.77	27.06	24.29	47.88	55.19	56.18	118.09	79.54
		Am_Tr_018126	3678	PNX74615.1_4-coumarate-CoA ligase 10-like protein [Trifolium pratense]	AT3G48990.1_AMP-dependent synthetase and ligase family protein, GeneName=AAE3	IPR000873_AMP-dependent synthetase/ligase	4CL	2.37667	9.33	7.83333	0.56	1.73	3.39	2.01	7.13	10.81	10.05	4.51	7.74	11.25	0.74	0.72	0.22
		Am_Tr_071675	3273	ATY39971.1_4-coumaroyl:CoA-ligase [Astragalus membranaceus]	AT1G20510.3_OPC-8:0 CoA ligase1, GeneName=OPCL1	IPR000873_AMP-dependent synthetase/ligase	4CL	8.07667	11.7	5.21	16.51	0.6	15.65	7.98	11.75	11.89	11.46	6.13	3.94	5.56	20.64	14.4	14.49
		Am_Tr_015732	3183	PNY17269.1_4-coumarate-CoA ligase 7-like protein [Trifolium pratense]	AT4G05160.1_AMP-dependent synthetase and ligase family protein	IPR000873_AMP-dependent synthetase/ligase; IPR025110_AMP-binding enzyme, C-terminal domain	4CL	1.02	6.91667	1.41333	1.38667	0.33	1.36	1.37	10.35	1.58	8.82	0.29	1.24	2.71	3.22	0.63	0.31
		Am_Tr_018129	2928	PNX74615.1_4-coumarate-CoA ligase 10-like protein [Trifolium pratense]	AT3G48990.1_AMP-dependent synthetase and ligase family protein, GeneName=AAE3	IPR000873_AMP-dependent synthetase/ligase	4CL	11.76	0.78	0.813333	1.59667	9.13	11.14	15.01	1.24	0.49	0.61	0.53	0.89	1.02	4.34	0.37	0.08
		Am_Tr_160621	2641	AID51448.1_4-coumaroyl:CoA-ligase [Astragalus membranaceus]	AT3G21240.2_4-coumarate:CoA ligase 2, GeneName=4CL2	IPR000873_AMP-dependent synthetase/ligase	4CL	10.3833	0.833333	2.27333	8.07667	13.92	8.93	8.3	0.96	0.98	0.56	2.62	1.59	2.61	9.37	9.24	5.62
		Am_Tr_207368	2508	TKY54583.1_4-coumarate--CoA ligase 1 [Spatholobus suberectus]	AT1G51680.1_4-coumarate:CoA ligase 1, GeneName=4CL1	IPR025110_AMP-binding enzyme, C-terminal domain; IPR000873_AMP-dependent synthetase/ligase	4CL	0.03	0.876667	11.87	0.0433333	0	0	0.09	0.45	1.55	0.63	4.25	17.79	13.57	0.04	0.09	0
		Am_Tr_093803	2433	XP_004511423.1_4-coumarate--CoA ligase 2 [Cicer arietinum]	AT1G65060.1_4-coumarate:CoA ligase 3, GeneName=4CL3	IPR000873_AMP-dependent synthetase/ligase; IPR025110_AMP-binding enzyme, C-terminal domain	4CL	68.9067	56.4267	34.3533	37.7733	36.22	136.47	34.03	36.64	66.36	66.28	14.79	37.53	50.74	27.58	42.73	43.01
		Am_Tr_133602	2318	XP_004515681.1_4-coumarate--CoA ligase-like 9 [Cicer arietinum]	AT5G63380.1_AMP-dependent synthetase and ligase family protein	IPR025110_AMP-binding enzyme, C-terminal domain; IPR000873_AMP-dependent synthetase/ligase	4CL	0.03	24.8133	1.51667	3.87333	0	0.09	0	23.16	25.2	26.08	0.72	1.38	2.45	3.94	2.95	4.73
		Am_Tr_071674	2150	ATY39971.1_4-coumaroyl:CoA-ligase [Astragalus membranaceus]	AT1G20510.1_OPC-8:0 CoA ligase1, GeneName=OPCL1	IPR000873_AMP-dependent synthetase/ligase; IPR025110_AMP-binding enzyme, C-terminal domain	4CL	47.4067	79.2733	27.71	81.05	7.26	67.67	67.29	89.99	56.24	91.59	12.43	24.93	45.77	87.85	61.68	93.62
		Am_Tr_053753	2115	XP_004512448.1_4-coumarate--CoA ligase-like 6 isoform X1 [Cicer arietinum]	AT4G19010.1_AMP-dependent synthetase and ligase family protein	IPR025110_AMP-binding enzyme, C-terminal domain; IPR000873_AMP-dependent synthetase/ligase	4CL	0.896667	2.88333	4.27	6.52333	0.31	1.58	0.8	2.11	3.35	3.19	3.51	4.49	4.81	6.91	5.74	6.92
		Am_Tr_160622	2078	AID51448.1_4-coumaroyl:CoA-ligase [Astragalus membranaceus]	AT3G21240.1_4-coumarate:CoA ligase 2, GeneName=4CL2	IPR025110_AMP-binding enzyme, C-terminal domain; IPR000873_AMP-dependent synthetase/ligase	4CL	8.92667	0.843333	1.66333	6.10333	11.55	10.16	5.07	0.52	1.06	0.95	1.01	2.07	1.91	5.47	8.36	4.48
		Am_Tr_019735	2076	XP_045803451.1_4-coumarate--CoA ligase-like 9 [Trifolium pratense]	AT5G63380.1_AMP-dependent synthetase and ligase family protein	IPR000873_AMP-dependent synthetase/ligase	4CL	7.44	11.3067	11.12	12.75	3.85	9.85	8.62	10.56	12.13	11.23	10.38	13.35	9.63	11.17	13.57	13.51
		Am_Tr_160617	1621	AID51448.1_4-coumaroyl:CoA-ligase [Astragalus membranaceus]	AT3G21240.2_4-coumarate:CoA ligase 2, GeneName=4CL2	IPR000873_AMP-dependent synthetase/ligase	4CL	7.59333	0.316667	1.18	5.55333	10	9.8	2.98	0.37	0	0.58	1.14	1.29	1.11	6.71	6.48	3.47
		Am_Tr_071678	1613	KHN12599.1_4-coumarate--CoA ligase-like 5 [Glycine soja]	AT1G20510.1_OPC-8:0 CoA ligase1, GeneName=OPCL1	.	4CL	3.65333	5.31667	1.3	5.13333	0	0	10.96	11.81	1.19	2.95	2.09	0.34	1.47	12.8	0.8	1.8
		Am_Tr_133217	719	PNX71577.1_4-coumarate-CoA ligase 9-like protein, partial [Trifolium pratense]	AT5G63380.1_AMP-dependent synthetase and ligase family protein	IPR000873_AMP-dependent synthetase/ligase	4CL	3.25333	6.65333	5.33	7.23333	2.79	4.84	2.13	8.19	8.15	3.62	3.82	6.87	5.3	7.7	7.55	6.45
		Am_Tr_041484	539	PNX54643.1_4-coumarate-CoA ligase 1-like protein [Trifolium pratense]	AT3G21240.1_4-coumarate:CoA ligase 2, GeneName=4CL2	.	4CL	16.9567	5.63667	18.6867	23.7767	11.25	27.99	11.63	3.46	6.98	6.47	18.47	19.15	18.44	13.95	35.69	21.69
		Am_Tr_133216	503	KAH1246096.1_4-coumarate--CoA ligase-like 9 [Glycine max]	.	.	4CL	5.32333	6.34	5.63667	8.58333	4.24	8.44	3.29	5.29	10.01	3.72	2.39	8.95	5.57	5.5	11.39	8.86
Iso-seq	9	Am_HQ_62204	1748	XP_004493096.1_chalcone synthase [Cicer arietinum]	AT5G13930.1_Chalcone and stilbene synthase family protein, GeneName=TT4	IPR016039_Thiolase-like; IPR001099_Chalcone/stilbene synthase, N-terminal; IPR011141_Polyketide synthase, type III; IPR012328_Chalcone/stilbene synthase, C-terminal	CHS	0	121.383	212.983	7.53	0	0	0	116.1	142.08	105.97	203.47	199.67	235.81	13.76	2.53	6.3
		Am_HQ_65932	1692	ADZ45299.1_chalcone synthase 1 [Astragalus membranaceus]	AT5G13930.1_Chalcone and stilbene synthase family protein, GeneName=TT4	IPR012328_Chalcone/stilbene synthase, C-terminal; IPR016039_Thiolase-like; IPR001099_Chalcone/stilbene synthase, N-terminal	CHS	3.96	0.99	7.62333	1.13	5.73	3.09	3.06	1.39	0.51	1.07	2.89	7.23	12.75	0.8	1.03	1.56
		Am_HQ_72269	1522	XP_045830180.1_chalcone synthase 1B [Trifolium pratense]	AT5G13930.1_Chalcone and stilbene synthase family protein, GeneName=TT4	IPR016039_Thiolase-like; IPR001099_Chalcone/stilbene synthase, N-terminal; IPR011141_Polyketide synthase, type III; IPR012328_Chalcone/stilbene synthase, C-terminal	CHS	43.2467	64.4833	29.7333	16.2267	20.08	47.96	61.7	50.59	49.98	92.88	23.28	30.71	35.21	11.92	15.36	21.4
		Am_HQ_73797	1503	ADZ45299.1_chalcone synthase 1 [Astragalus membranaceus]	AT5G13930.1_Chalcone and stilbene synthase family protein, GeneName=TT4	IPR001099_Chalcone/stilbene synthase, N-terminal; IPR016039_Thiolase-like; IPR012328_Chalcone/stilbene synthase, C-terminal; IPR011141_Polyketide synthase, type III	CHS	443.283	57.3267	273.873	109.66	350.22	498.74	480.89	29.48	65.71	76.79	236.57	244.37	340.68	94.93	109.28	124.77
		Am_HQ_74424	1478	AFD36435.1_chalcone synthase 1 [Astragalus membranaceus]	AT5G13930.1_Chalcone and stilbene synthase family protein, GeneName=TT4	IPR001099_Chalcone/stilbene synthase, N-terminal; IPR016039_Thiolase-like; IPR011141_Polyketide synthase, type III; IPR012328_Chalcone/stilbene synthase, C-terminal	CHS	116.113	46.7767	46.26	51.52	91.3	161.89	95.15	37.8	35.09	67.44	39.95	32.91	65.92	52.9	35.74	65.92
		Am_HQ_74751	1454	QIM59642.1_chalcone synthase [Astragalus mongholicus]	AT5G13930.1_Chalcone and stilbene synthase family protein, GeneName=TT4	IPR016039_Thiolase-like; IPR011141_Polyketide synthase, type III; IPR001099_Chalcone/stilbene synthase, N-terminal; IPR012328_Chalcone/stilbene synthase, C-terminal	CHS	120.78	92.5333	157.637	58.01	127.26	154.01	81.07	56.87	87.45	133.28	110.94	146.23	215.74	47.88	54.97	71.18
		Am_HQ_76172	1458	ATY39972.1_Chalcone synthase [Astragalus membranaceus]	AT5G13930.1_Chalcone and stilbene synthase family protein, GeneName=TT4	IPR016039_Thiolase-like; IPR011141_Polyketide synthase, type III; IPR012328_Chalcone/stilbene synthase, C-terminal; IPR001099_Chalcone/stilbene synthase, N-terminal	CHS	638.613	219.247	280.193	128.653	730.07	684.46	501.31	231.47	139.93	286.34	184.96	289.55	366.07	110.55	157.72	117.69
		Am_HQ_76757	1409	ADZ45297.1_chalcone synthase 2 [Astragalus membranaceus]	AT5G13930.1_Chalcone and stilbene synthase family protein, GeneName=TT4	IPR001099_Chalcone/stilbene synthase, N-terminal; IPR016039_Thiolase-like; IPR011141_Polyketide synthase, type III; IPR012328_Chalcone/stilbene synthase, C-terminal	CHS	1380.71	18.5167	143.26	58.73	1402.15	1933.13	806.85	12.27	17.71	25.57	142.54	107.22	180.02	50.49	59.44	66.26
		Am_HQ_78631	1383	AID51449.1_chalcone synthase 2 [Astragalus membranaceus]	AT5G13930.1_Chalcone and stilbene synthase family protein, GeneName=TT4	IPR001099_Chalcone/stilbene synthase, N-terminal; IPR011141_Polyketide synthase, type III; IPR012328_Chalcone/stilbene synthase, C-terminal; IPR016039_Thiolase-like	CHS	207.07	2.35	1.77333	4.70333	400.23	160.9	60.08	4.35	2.46	0.24	3.42	1.03	0.87	10.05	2.09	1.97
rnaSPAdes	19	Am_Rn_019665	3392	ADZ45297.1_chalcone synthase 2 [Astragalus membranaceus]	AT5G13930.1_Chalcone and stilbene synthase family protein, GeneName=TT4	IPR001099_Chalcone/stilbene synthase, N-terminal; IPR016039_Thiolase-like; IPR012328_Chalcone/stilbene synthase, C-terminal	CHS	165.63	13.8333	36.1433	23.3267	170.45	227.98	98.46	11	15.09	15.41	35.57	35.35	37.51	26.29	24.28	19.41
		Am_Rn_046220	2131	ADZ45299.1_chalcone synthase 1 [Astragalus membranaceus]	AT5G13930.1_Chalcone and stilbene synthase family protein, GeneName=TT4	IPR012328_Chalcone/stilbene synthase, C-terminal; IPR016039_Thiolase-like; IPR001099_Chalcone/stilbene synthase, N-terminal	CHS	3.09	0.87	5.9	0.983333	4.64	2.45	2.18	1.23	0.44	0.94	1.93	5.84	9.93	0.69	0.9	1.36
		Am_Rn_053989	1877	ADZ45299.1_chalcone synthase 1 [Astragalus membranaceus]	AT5G13930.1_Chalcone and stilbene synthase family protein, GeneName=TT4	IPR016039_Thiolase-like; IPR001099_Chalcone/stilbene synthase, N-terminal; IPR012328_Chalcone/stilbene synthase, C-terminal; IPR011141_Polyketide synthase, type III	CHS	345.997	49.14	205.657	93.9267	289.15	402.53	346.31	26.16	55.12	66.14	155.64	194.01	267.32	80.26	93.49	108.03
		Am_Rn_054104	1874	XP_004493096.1_chalcone synthase [Cicer arietinum]	AT5G13930.1_Chalcone and stilbene synthase family protein, GeneName=TT4	IPR016039_Thiolase-like; IPR001099_Chalcone/stilbene synthase, N-terminal; IPR011141_Polyketide synthase, type III; IPR012328_Chalcone/stilbene synthase, C-terminal	CHS	0	128.343	197.083	7.88333	0	0	0	123.79	147.88	113.36	162.61	199.44	229.2	14.27	2.75	6.63
		Am_Rn_059338	1717	AFD36435.1_chalcone synthase 1 [Astragalus membranaceus]	AT5G13930.1_Chalcone and stilbene synthase family protein, GeneName=TT4	IPR001099_Chalcone/stilbene synthase, N-terminal; IPR016039_Thiolase-like; IPR011141_Polyketide synthase, type III; IPR012328_Chalcone/stilbene synthase, C-terminal	CHS	100.687	45.7467	39.4567	50.6033	84.45	142.48	75.13	37.88	32.54	66.82	29.46	30.73	58.18	50.54	35.89	65.38
		Am_Rn_067016	1505	AEF14414.1_chalcone synthase [Onobrychis viciifolia]	AT5G13930.1_Chalcone and stilbene synthase family protein, GeneName=TT4	IPR011141_Polyketide synthase, type III; IPR001099_Chalcone/stilbene synthase, N-terminal; IPR016039_Thiolase-like; IPR012328_Chalcone/stilbene synthase, C-terminal	CHS	41.7767	69.95	28.76	17.6133	20.38	48.12	56.83	56.37	53.05	100.43	19.76	31.07	35.45	12.5	16.86	23.48
		Am_Rn_081336	1164	ABL14037.1_chalcone synthase 3, partial [Astragalus mongholicus]	AT5G13930.1_Chalcone and stilbene synthase family protein, GeneName=TT4	IPR001099_Chalcone/stilbene synthase, N-terminal; IPR016039_Thiolase-like	CHS	5.39333	1.57667	7.81667	1.58667	12.91	1.48	1.79	2.18	1.02	1.53	1.14	8.66	13.65	1.36	1.41	1.99
		Am_Rn_083078	1127	PNX99106.1_chalcone synthase, partial [Trifolium pratense]	AT5G13930.1_Chalcone and stilbene synthase family protein, GeneName=TT4	.	CHS	7.67	0.883333	2.38667	2.07667	8.5	11.28	3.23	0.87	0.7	1.08	2.52	2.88	1.76	2.25	3.09	0.89
		Am_Rn_083972	1108	AAZ73731.1_chalcone synthase, partial [Astragalus mongholicus] CAJ20138.1 chalcone synthase, partial [Astragalus mongholicus]	AT5G13930.1_Chalcone and stilbene synthase family protein, GeneName=TT4	IPR012328_Chalcone/stilbene synthase, C-terminal; IPR001099_Chalcone/stilbene synthase, N-terminal; IPR016039_Thiolase-like	CHS	552.73	0	30.1533	9.35667	599.41	782.64	276.14	0	0	0	26.3	16.27	47.89	1.61	10.4	16.06
		Am_Rn_084476	1098	ATY39972.1_Chalcone synthase [Astragalus membranaceus]	AT5G13930.1_Chalcone and stilbene synthase family protein, GeneName=TT4	IPR016039_Thiolase-like; IPR012328_Chalcone/stilbene synthase, C-terminal; IPR001099_Chalcone/stilbene synthase, N-terminal	CHS	570.4	220.803	266.037	134.197	688.64	605.96	416.6	232.57	141.31	288.53	174.16	279.61	344.34	113.12	173.39	116.08
		Am_Rn_085936	1069	ABL14037.1_chalcone synthase 3, partial [Astragalus mongholicus]	AT5G13930.1_Chalcone and stilbene synthase family protein, GeneName=TT4	IPR016039_Thiolase-like; IPR001099_Chalcone/stilbene synthase, N-terminal	CHS	1.64667	1.17	5.44	0.876667	1.98	1.39	1.57	1.68	0.9	0.93	1.75	6.69	7.88	0.57	0.93	1.13
		Am_Rn_089014	1010	ABL14037.1_chalcone synthase 3, partial [Astragalus mongholicus]	AT5G13930.1_Chalcone and stilbene synthase family protein, GeneName=TT4	IPR001099_Chalcone/stilbene synthase, N-terminal; IPR016039_Thiolase-like	CHS	10.33	0.223333	4.38667	0.44	18.16	7.84	4.99	0	0	0.67	0.63	3.86	8.67	1.05	0.27	0
		Am_Rn_091935	956	QIM59642.1_chalcone synthase [Astragalus mongholicus]	AT5G13930.1_Chalcone and stilbene synthase family protein, GeneName=TT4	IPR016039_Thiolase-like; IPR012328_Chalcone/stilbene synthase, C-terminal; IPR001099_Chalcone/stilbene synthase, N-terminal	CHS	107.297	85.7367	138.753	59.9667	125.55	133.91	62.43	48.77	82.96	125.48	106.79	132.14	177.33	52.94	57.61	69.35
		Am_Rn_092292	950	AID51449.1_chalcone synthase 2 [Astragalus membranaceus]	AT5G13930.1_Chalcone and stilbene synthase family protein, GeneName=TT4	IPR001099_Chalcone/stilbene synthase, N-terminal; IPR016039_Thiolase-like; IPR012328_Chalcone/stilbene synthase, C-terminal	CHS	178.87	1.9	1.37	4.70333	347.56	130.65	58.4	3.66	1.73	0.31	2.43	1.21	0.47	9.21	2.26	2.64
		Am_Rn_094293	914	ATY39972.1_Chalcone synthase [Astragalus membranaceus]	AT5G13930.1_Chalcone and stilbene synthase family protein, GeneName=TT4	IPR001099_Chalcone/stilbene synthase, N-terminal; IPR016039_Thiolase-like	CHS	419.703	176.863	179.777	97.4633	476.33	482.75	300.03	186.45	109.47	234.67	70.23	210.76	258.34	81.79	114.27	96.33
		Am_Rn_098524	844	AID51449.1_chalcone synthase 2 [Astragalus membranaceus]	AT5G13930.1_Chalcone and stilbene synthase family protein, GeneName=TT4	IPR016039_Thiolase-like; IPR001099_Chalcone/stilbene synthase, N-terminal	CHS	137.107	2.75667	3.81	4.96667	264.78	146.54	0	4.53	3.74	0	2.98	4.3	4.15	11.08	3.82	0
		Am_Rn_098643	842	AID51449.1_chalcone synthase 2 [Astragalus membranaceus]	AT5G13930.1_Chalcone and stilbene synthase family protein, GeneName=TT4	IPR001099_Chalcone/stilbene synthase, N-terminal; IPR016039_Thiolase-like	CHS	112.743	110.107	151.16	59.86	110.89	154.38	72.96	70.27	100.88	159.17	64.4	151.95	237.13	43.47	57.97	78.14
		Am_Rn_100350	816	QHX39740.1_chalcone synthase, partial [Cajanus cajan]	AT5G13930.1_Chalcone and stilbene synthase family protein, GeneName=TT4	IPR016039_Thiolase-like; IPR001099_Chalcone/stilbene synthase, N-terminal	CHS	82.8067	0.7	0.443333	1.84667	158.66	27.8	61.96	0.99	0	1.11	0.93	0	0.4	1.75	0	3.79
		Am_Rn_104546	756	ADZ45297.1_chalcone synthase 2 [Astragalus membranaceus]	AT5G13930.1_Chalcone and stilbene synthase family protein, GeneName=TT4	IPR001099_Chalcone/stilbene synthase, N-terminal; IPR016039_Thiolase-like	CHS	1197.74	18.07	120.183	59.3733	1205.69	1767.32	620.22	11.56	16.7	25.95	80.6	105.88	174.07	46.26	56.66	75.2
Trinity	20	Am_Tr_059637	1874	XP_004493096.1_chalcone synthase [Cicer arietinum]	AT5G13930.1_Chalcone and stilbene synthase family protein, GeneName=TT4	IPR016039_Thiolase-like; IPR001099_Chalcone/stilbene synthase, N-terminal; IPR011141_Polyketide synthase, type III; IPR012328_Chalcone/stilbene synthase, C-terminal	CHS	0	98.97	151.133	6.01	0	0	0	95.38	113.29	88.24	128.16	151.29	173.95	10.94	2.07	5.02
		Am_Tr_030719	1718	ATY39972.1_Chalcone synthase [Astragalus membranaceus]	AT5G13930.1_Chalcone and stilbene synthase family protein, GeneName=TT4	IPR001099_Chalcone/stilbene synthase, N-terminal; IPR016039_Thiolase-like; IPR011141_Polyketide synthase, type III; IPR012328_Chalcone/stilbene synthase, C-terminal	CHS	283.503	28.14	110.757	50.9067	252.33	357.22	240.96	10.92	33.65	39.85	72.68	104.18	155.41	43.02	49.51	60.19
		Am_Tr_030716	1693	ATY39972.1_Chalcone synthase [Astragalus membranaceus]	AT5G13930.1_Chalcone and stilbene synthase family protein, GeneName=TT4	IPR016039_Thiolase-like; IPR012328_Chalcone/stilbene synthase, C-terminal; IPR001099_Chalcone/stilbene synthase, N-terminal; IPR011141_Polyketide synthase, type III	CHS	552.72	89.1533	168.013	88.9033	553.52	677.54	427.1	77.24	70.63	119.59	131.76	153.31	218.97	78.37	90.7	97.64
		Am_Tr_030718	1669	QIM59642.1_chalcone synthase [Astragalus mongholicus]	AT5G13930.1_Chalcone and stilbene synthase family protein, GeneName=TT4	IPR012328_Chalcone/stilbene synthase, C-terminal; IPR016039_Thiolase-like; IPR001099_Chalcone/stilbene synthase, N-terminal; IPR011141_Polyketide synthase, type III	CHS	175.34	3.65667	13.98	7.97	206.05	240.19	79.78	3	3.76	4.21	10.48	11.14	20.32	7.7	6.34	9.87
		Am_Tr_034095	1632	XP_045830180.1_chalcone synthase 1B [Trifolium pratense]	AT5G13930.1_Chalcone and stilbene synthase family protein, GeneName=TT4	IPR016039_Thiolase-like; IPR001099_Chalcone/stilbene synthase, N-terminal; IPR011141_Polyketide synthase, type III; IPR012328_Chalcone/stilbene synthase, C-terminal	CHS	36.2333	53.85	21.51	13.1833	17.02	41.19	50.49	42.12	40.57	78.86	14.74	23.51	26.28	9.61	12.52	17.42
		Am_Tr_030717	1535	ATY39972.1_Chalcone synthase [Astragalus membranaceus]	AT5G13930.1_Chalcone and stilbene synthase family protein, GeneName=TT4	IPR016039_Thiolase-like; IPR011141_Polyketide synthase, type III; IPR012328_Chalcone/stilbene synthase, C-terminal; IPR001099_Chalcone/stilbene synthase, N-terminal	CHS	612.687	138.907	163.43	86.1967	689.87	763.83	384.36	132.38	95.21	189.13	87.05	178.35	224.89	74.66	95.6	88.33
		Am_Tr_074322	835	PNX75906.1_chalcone synthase, partial [Trifolium pratense]	AT5G13930.1_Chalcone and stilbene synthase family protein, GeneName=TT4	.	CHS	345.547	6.59667	40.9967	16.9333	372.09	472.32	192.23	6.01	4.98	8.8	47.75	28.07	47.17	14.16	19.03	17.61
		Am_Tr_128009	546	PNX75906.1_chalcone synthase, partial [Trifolium pratense]	AT5G13930.1_Chalcone and stilbene synthase family protein, GeneName=TT4	IPR016039_Thiolase-like; IPR012328_Chalcone/stilbene synthase, C-terminal	CHS	98.5433	23.8133	28.79	24.8067	146.96	92.83	55.84	17.02	20.46	33.96	24.83	29.62	31.92	33.45	19.07	21.9
		Am_Tr_034100	540	ADZ45297.1_chalcone synthase 2 [Astragalus membranaceus]	AT5G13930.1_Chalcone and stilbene synthase family protein, GeneName=TT4	IPR016039_Thiolase-like; IPR001099_Chalcone/stilbene synthase, N-terminal	CHS	285.277	48.4933	74.26	38.98	309.97	398.62	147.24	25.11	42.3	78.07	34.19	69.36	119.23	33.77	31.2	51.97
		Am_Tr_034102	514	ATI97626.1_CHS, partial [Lotus sessilifolius]	AT5G13930.1_Chalcone and stilbene synthase family protein, GeneName=TT4	.	CHS	16.7667	2.62667	13.03	3.75667	14.49	19.87	15.94	1.56	3.24	3.08	6.14	11.53	21.42	3.2	3.27	4.8
		Am_Tr_049514	510	AAZ32905.1_chalcone synthase, partial [Medicago sativa]	AT5G13930.1_Chalcone and stilbene synthase family protein, GeneName=TT4	IPR016039_Thiolase-like; IPR012328_Chalcone/stilbene synthase, C-terminal; IPR001099_Chalcone/stilbene synthase, N-terminal	CHS	350.843	123.073	141.107	69.1067	405.96	378.28	268.29	131.67	69.73	167.82	85.19	158.95	179.18	51.51	89.33	66.48
		Am_Tr_054114	490	P51079.1_RecName: Full=Chalcone synthase 6-4; AltName: Full=Naringenin-chalcone synthase 6-4 [Medicago sativa] AAB41558.1 chalcone synthase, partial [Medicago sativa]	AT5G13930.1_Chalcone and stilbene synthase family protein, GeneName=TT4	IPR016039_Thiolase-like; IPR001099_Chalcone/stilbene synthase, N-terminal; IPR012328_Chalcone/stilbene synthase, C-terminal	CHS	945.267	39.91	132.513	71.43	941.16	1299.12	595.52	29.16	33.57	57	116.08	111.55	169.91	70.73	62.95	80.61
		Am_Tr_054115	480	PNX59440.1_chalcone synthase, partial [Trifolium pratense]	AT5G13930.1_Chalcone and stilbene synthase family protein, GeneName=TT4	.	CHS	102.79	9.65	6.78667	9.82	197.82	73.3	37.25	9.81	7.28	11.86	8.25	3.57	8.54	10.81	8.15	10.5
		Am_Tr_074548	412	PNX69487.1_chalcone synthase [Trifolium pratense]	AT5G13930.1_Chalcone and stilbene synthase family protein, GeneName=TT4	.	CHS	61.8	10.6233	14.7633	13.1	77.82	74.57	33.01	9.98	6.62	15.27	24.73	5.07	14.49	17.88	7.43	13.99
		Am_Tr_034096	327	AAZ73731.1_chalcone synthase, partial [Astragalus mongholicus] CAJ20138.1 chalcone synthase, partial [Astragalus mongholicus]	AT5G13930.1_Chalcone and stilbene synthase family protein, GeneName=TT4	IPR001099_Chalcone/stilbene synthase, N-terminal; IPR016039_Thiolase-like	CHS	87.9367	78.1033	96.2933	39.1967	74.64	138.8	50.37	52.81	72.01	109.49	49.57	99.74	139.57	20.7	41.7	55.19
		Am_Tr_034099	325	PNX63947.1_chalcone synthase, partial [Trifolium pratense]	AT5G13930.1_Chalcone and stilbene synthase family protein, GeneName=TT4	.	CHS	135.093	14.57	23.6067	8.03	260.32	98.59	46.37	11.38	15.38	16.95	21.34	16.11	33.37	6.36	10.91	6.82
		Am_Tr_190871	285	ACO83024.1_chalcone synthase, partial [Trifolium subterraneum]	AT5G13930.1_Chalcone and stilbene synthase family protein, GeneName=TT4	.	CHS	10.03	2.44	1.58	2.09667	7.82	10.51	11.76	2.51	1.5	3.31	0	2.42	2.32	2.49	2.56	1.24
		Am_Tr_148151	275	AAZ32891.1_naringenin-chalcone synthase, partial [Medicago sativa]	AT5G13930.1_Chalcone and stilbene synthase family protein, GeneName=TT4	.	CHS	6.18333	0	1.19333	0.466667	18.55	0	0	0	0	0	3.58	0	0	1.4	0	0
		Am_Tr_109385	232	ATI97626.1_CHS, partial [Lotus sessilifolius]	AT5G13930.1_Chalcone and stilbene synthase family protein, GeneName=TT4	.	CHS	15.62	0.98	2.43667	6.58333	46.86	0	0	2.94	0	0	7.31	0	0	19.75	0	0
		Am_Tr_129504	232	ATI97626.1_CHS, partial [Lotus sessilifolius]	AT5G13930.1_Chalcone and stilbene synthase family protein, GeneName=TT4	.	CHS	204.91	155.473	165.44	77.73	206.23	262.19	146.31	88.27	149.4	228.75	70.69	170.3	255.33	59.26	73.48	100.45
Iso-seq	9	Am_HQ_33325	2396	CAA11226.1_chalcone reductase [Sesbania rostrata]	AT1G59950.1_NAD(P)-linked oxidoreductase superfamily protein	IPR036812_NADP-dependent oxidoreductase domain superfamily; IPR023210_NADP-dependent oxidoreductase domain; IPR020471_Aldo-keto reductase	CHR	0	9.13	1.61667	5.76333	0	0	0	9.01	9.03	9.35	1.19	2.06	1.6	3.72	9.41	4.16
		Am_HQ_53662	1944	CAA11226.1_chalcone reductase [Sesbania rostrata]	AT1G59960.1_NAD(P)-linked oxidoreductase superfamily protein	IPR036812_NADP-dependent oxidoreductase domain superfamily; IPR023210_NADP-dependent oxidoreductase domain; IPR020471_Aldo-keto reductase	CHR	0.0766667	7.52667	0.99	5.7	0	0.23	0	7.28	8.45	6.85	1.76	0.35	0.86	3.03	6.98	7.09
		Am_HQ_72927	1539	ATY39973.1_Chalcone reductase [Astragalus membranaceus]	AT1G59960.1_NAD(P)-linked oxidoreductase superfamily protein	IPR036812_NADP-dependent oxidoreductase domain superfamily; IPR020471_Aldo-keto reductase; IPR023210_NADP-dependent oxidoreductase domain	CHR	918.097	63.32	60.7733	111.9	1834.7	676.33	243.26	50.94	69.95	69.07	87.25	30.92	64.15	174.26	75.82	85.62
		Am_HQ_76090	1439	AFC01214.1_chalcone reductase 1 [Astragalus membranaceus]	AT1G59960.1_NAD(P)-linked oxidoreductase superfamily protein	IPR023210_NADP-dependent oxidoreductase domain; IPR036812_NADP-dependent oxidoreductase domain superfamily	CHR	11.5067	6.71	8.52333	4.99333	14.39	12.83	7.3	1.26	8.42	10.45	4.23	11.86	9.48	2	6.45	6.53
		Am_HQ_78778	1373	CAA11226.1_chalcone reductase [Sesbania rostrata]	AT1G59960.1_NAD(P)-linked oxidoreductase superfamily protein	IPR036812_NADP-dependent oxidoreductase domain superfamily; IPR020471_Aldo-keto reductase; IPR023210_NADP-dependent oxidoreductase domain	CHR	0.113333	207.133	69.88	187.023	0	0.34	0	219.84	175.04	226.52	70.13	66.55	72.96	192	152.08	216.99
		Am_HQ_79181	1345	CAA11226.1_chalcone reductase [Sesbania rostrata]	AT1G59960.1_NAD(P)-linked oxidoreductase superfamily protein	IPR020471_Aldo-keto reductase; IPR036812_NADP-dependent oxidoreductase domain superfamily; IPR023210_NADP-dependent oxidoreductase domain	CHR	0	129.263	27.73	119.587	0	0	0	148.62	125.22	113.95	23.98	25.52	33.69	113.68	94.62	150.46
		Am_HQ_80782	1320	AFC01214.1_chalcone reductase 1 [Astragalus membranaceus]	AT1G59960.1_NAD(P)-linked oxidoreductase superfamily protein	IPR036812_NADP-dependent oxidoreductase domain superfamily; IPR020471_Aldo-keto reductase; IPR023210_NADP-dependent oxidoreductase domain	CHR	148.403	194.567	228.957	40.1733	107.89	165.19	172.13	133.61	210.4	239.69	143.72	277.39	265.76	32.51	63.25	24.76
		Am_HQ_81285	1306	AFC01214.1_chalcone reductase 1 [Astragalus membranaceus]	AT1G59960.1_NAD(P)-linked oxidoreductase superfamily protein	IPR023210_NADP-dependent oxidoreductase domain; IPR020471_Aldo-keto reductase; IPR036812_NADP-dependent oxidoreductase domain superfamily	CHR	29.3567	26.9933	21.36	8.21	21.2	48.48	18.39	10.8	33.53	36.65	6.92	23.98	33.18	4.24	13.49	6.9
		Am_HQ_81515	1277	AFC01214.1_chalcone reductase 1 [Astragalus membranaceus]	AT1G59960.1_NAD(P)-linked oxidoreductase superfamily protein	IPR036812_NADP-dependent oxidoreductase domain superfamily; IPR020471_Aldo-keto reductase; IPR023210_NADP-dependent oxidoreductase domain	CHR	371.313	32.9867	28.6867	72.21	9.56	782.69	321.69	0.23	52.25	46.48	0.44	24.77	60.85	2.43	106.75	107.45
rnaSPAdes	7	Am_Rn_050064	2002	AFC01214.1_chalcone reductase 1 [Astragalus membranaceus]	AT1G59960.1_NAD(P)-linked oxidoreductase superfamily protein	IPR023210_NADP-dependent oxidoreductase domain; IPR036812_NADP-dependent oxidoreductase domain superfamily	CHR	15.0767	3	2.56	4.81667	8.98	26.64	9.61	0	3.55	5.45	0.66	2.73	4.29	1.76	6.71	5.98
		Am_Rn_051480	1957	AFC01214.1_chalcone reductase 1 [Astragalus membranaceus]	AT1G59960.1_NAD(P)-linked oxidoreductase superfamily protein	IPR023210_NADP-dependent oxidoreductase domain; IPR036812_NADP-dependent oxidoreductase domain superfamily	CHR	7.78	23.9967	24.59	3.15	9.05	7.08	7.21	11.87	28.93	31.19	12.17	34.01	27.59	2.45	5.62	1.38
		Am_Rn_055530	1830	ATY39973.1_Chalcone reductase [Astragalus membranaceus]	AT1G59960.1_NAD(P)-linked oxidoreductase superfamily protein	IPR020471_Aldo-keto reductase; IPR036812_NADP-dependent oxidoreductase domain superfamily; IPR023210_NADP-dependent oxidoreductase domain	CHR	48.0567	43.3133	39.9567	13.9767	69.19	40.38	34.6	33.91	47.14	48.89	25.87	44.4	49.6	14.41	19.06	8.46
		Am_Rn_059711	1706	ATY39973.1_Chalcone reductase [Astragalus membranaceus]	AT1G59960.1_NAD(P)-linked oxidoreductase superfamily protein	IPR036812_NADP-dependent oxidoreductase domain superfamily; IPR020471_Aldo-keto reductase; IPR023210_NADP-dependent oxidoreductase domain	CHR	948.877	55.8833	44.79	125.617	1650.63	912.27	283.73	35.72	68.31	63.62	48.88	26.57	58.92	149.14	108.02	119.69
		Am_Rn_061346	1661	AFC01214.1_chalcone reductase 1 [Astragalus membranaceus]	AT1G59960.1_NAD(P)-linked oxidoreductase superfamily protein	IPR020471_Aldo-keto reductase; IPR036812_NADP-dependent oxidoreductase domain superfamily; IPR023210_NADP-dependent oxidoreductase domain	CHR	162.503	117.26	116.093	45.1	47.72	286.65	153.14	67.5	132	152.28	54.52	142.28	151.48	17.83	70.59	46.88
		Am_Rn_063625	1597	CAA11226.1_chalcone reductase [Sesbania rostrata]	AT1G59960.1_NAD(P)-linked oxidoreductase superfamily protein	IPR020471_Aldo-keto reductase; IPR023210_NADP-dependent oxidoreductase domain; IPR036812_NADP-dependent oxidoreductase domain superfamily	CHR	0.0366667	263.273	51.5433	218.613	0	0.11	0	289.49	218.26	282.07	54.16	47.28	53.19	228.55	157.82	269.47
		Am_Rn_091563	963	AFC01214.1_chalcone reductase 1 [Astragalus membranaceus]	AT1G59950.1_NAD(P)-linked oxidoreductase superfamily protein	IPR023210_NADP-dependent oxidoreductase domain; IPR036812_NADP-dependent oxidoreductase domain superfamily	CHR	7.53667	2.78	3.03	4.43333	5.97	13.43	3.21	1.2	3.36	3.78	6.61	0.68	1.8	7.15	2.95	3.2
Trinity	7	Am_Tr_054889	2274	CAA11226.1_chalcone reductase [Sesbania rostrata]	AT1G59960.1_NAD(P)-linked oxidoreductase superfamily protein	IPR036812_NADP-dependent oxidoreductase domain superfamily; IPR020471_Aldo-keto reductase; IPR023210_NADP-dependent oxidoreductase domain	CHR	0.116667	0.546667	3.55667	6.62333	0	0.35	0	0.21	1.31	0.12	1.29	5.2	4.18	4.83	5.23	9.81
		Am_Tr_054890	2106	CAA11226.1_chalcone reductase [Sesbania rostrata]	AT1G59950.1_NAD(P)-linked oxidoreductase superfamily protein	IPR020471_Aldo-keto reductase; IPR036812_NADP-dependent oxidoreductase domain superfamily; IPR023210_NADP-dependent oxidoreductase domain	CHR	0	6.02333	0.136667	1.42667	0	0	0	6.27	5.49	6.31	0.35	0.06	0	0.02	2.87	1.39
		Am_Tr_054893	1874	CAA11226.1_chalcone reductase [Sesbania rostrata]	AT1G59960.1_NAD(P)-linked oxidoreductase superfamily protein	IPR036812_NADP-dependent oxidoreductase domain superfamily; IPR020471_Aldo-keto reductase; IPR023210_NADP-dependent oxidoreductase domain	CHR	0	53.1933	9.09333	44.9	0	0	0	62.92	43.96	52.7	10.11	6.7	10.47	42.09	28.65	63.96
		Am_Tr_054883	1645	CAA11226.1_chalcone reductase [Sesbania rostrata]	AT1G59960.1_NAD(P)-linked oxidoreductase superfamily protein	IPR036812_NADP-dependent oxidoreductase domain superfamily; IPR023210_NADP-dependent oxidoreductase domain; IPR020471_Aldo-keto reductase	CHR	0	184.72	47.7933	162.62	0	0	0	196.73	161.1	196.33	40	49.12	54.26	165.49	136.71	185.66
		Am_Tr_000828	1547	ATY39973.1_Chalcone reductase [Astragalus membranaceus]	AT1G59960.1_NAD(P)-linked oxidoreductase superfamily protein	IPR036812_NADP-dependent oxidoreductase domain superfamily; IPR020471_Aldo-keto reductase; IPR023210_NADP-dependent oxidoreductase domain	CHR	616.397	38.16	35.6267	77.22	1148.4	516.54	184.25	25.79	43.41	45.28	50.45	17.72	38.71	114.7	57.33	59.63
		Am_Tr_000827	1346	ATY39973.1_Chalcone reductase [Astragalus membranaceus]	AT1G59960.1_NAD(P)-linked oxidoreductase superfamily protein	IPR036812_NADP-dependent oxidoreductase domain superfamily; IPR020471_Aldo-keto reductase; IPR023210_NADP-dependent oxidoreductase domain	CHR	634	229.17	217.35	110.147	616.15	868.3	417.55	143.95	252.97	290.59	108.29	264.12	279.64	63.75	148.73	117.96
		Am_Tr_114359	359	AFC01214.1_chalcone reductase 1 [Astragalus membranaceus]	AT1G59950.1_NAD(P)-linked oxidoreductase superfamily protein	.	CHR	8.02333	4.19333	2.60333	2.85667	12.27	8.31	3.49	1.3	6.07	5.21	0.55	3.15	4.11	1.31	2.02	5.24
Iso-seq	3	Am_HQ_83661	1223	ATY39974.1_Chalcone isomerase [Astragalus membranaceus]	AT3G55120.1_Chalcone-flavanone isomerase family protein, GeneName=TT5	IPR016087_Chalcone isomerase; IPR036298_Chalcone isomerase superfamily	CHI	270.287	127.317	216.67	518.767	175.03	474.48	161.35	63.9	196.97	121.08	195.74	178.09	276.18	421.68	308.26	826.36
		Am_HQ_84333	1128	Q8H0G1.1_RecName: Full=Chalcone--flavanone isomerase 2; Short=Chalcone isomerase 2 [Lotus japonicus] BAC53984.1 putative chalcone isomerase [Lotus japonicus]	AT3G55120.1_Chalcone-flavanone isomerase family protein, GeneName=TT5	IPR036298_Chalcone isomerase superfamily; IPR016087_Chalcone isomerase	CHI	14.47	59.3533	95.2667	87.5133	9.25	28.77	5.39	43.32	72.17	62.57	121.74	78.62	85.44	77.7	74	110.84
		Am_HQ_88756	885	XP_013461511.2_probable chalcone--flavonone isomerase 3 [Medicago truncatula] AFK36813.1 unknown [Medicago truncatula]	AT5G05270.1_Chalcone-flavanone isomerase family protein, GeneName=CHIL	IPR016087_Chalcone isomerase; IPR036298_Chalcone isomerase superfamily	CHI	1485.12	253.877	489.573	356.597	2348.51	979.56	1127.29	221.11	281.66	258.86	503.89	430.75	534.08	345.43	379.33	345.03
rnaSPAdes	4	Am_Rn_019487	3403	ATY39974.1_Chalcone isomerase [Astragalus membranaceus]	AT3G55120.1_Chalcone-flavanone isomerase family protein, GeneName=TT5	IPR036298_Chalcone isomerase superfamily; IPR016087_Chalcone isomerase	CHI	89.94	66.3367	95.5767	218.013	59.74	161.84	48.24	38.34	94.39	66.28	83.31	85.34	118.08	175.56	138.41	340.07
		Am_Rn_082064	1148	XP_013461511.2_probable chalcone--flavonone isomerase 3 [Medicago truncatula] AFK36813.1 unknown [Medicago truncatula]	AT5G05270.1_Chalcone-flavanone isomerase family protein, GeneName=CHIL	IPR016087_Chalcone isomerase; IPR036298_Chalcone isomerase superfamily	CHI	337.35	84.1667	126.167	106.61	543.4	251.72	216.93	75.54	89.03	87.93	100.38	124.67	153.45	90.37	132.27	97.19
		Am_Rn_085271	1082	XP_013461511.2_probable chalcone--flavonone isomerase 3 [Medicago truncatula] AFK36813.1 unknown [Medicago truncatula]	AT5G05270.1_Chalcone-flavanone isomerase family protein, GeneName=CHIL	IPR016087_Chalcone isomerase; IPR036298_Chalcone isomerase superfamily	CHI	790.04	136.393	233.22	198.42	1309.19	503.85	557.08	112.7	153.57	142.91	202.89	229.1	267.67	193.65	200.39	201.22
		Am_Rn_087296	1043	PNY14782.1_chalcone-flavonone isomerase 2-like protein [Trifolium pratense]	AT1G53520.1_Chalcone-flavanone isomerase family protein, GeneName=FAP3	IPR036298_Chalcone isomerase superfamily; IPR016087_Chalcone isomerase	CHI	0.0433333	10.15	4.31667	3.66667	0.13	0	0	24.21	4.32	1.92	9.58	1.31	2.06	10.32	0.16	0.52
Trinity	6	Am_Tr_098397	3858	ATY39974.1_Chalcone isomerase [Astragalus membranaceus]	AT3G55120.1_Chalcone-flavanone isomerase family protein, GeneName=TT5	IPR016087_Chalcone isomerase; IPR036298_Chalcone isomerase superfamily	CHI	70.4633	34.7667	50.05	131.937	47.45	124.15	39.79	17.93	52.25	34.12	41.01	43.89	65.25	106.52	79.83	209.46
		Am_Tr_066445	1870	XP_004498865.1_fatty-acid-binding protein 2 [Cicer arietinum]	AT2G26310.1_Chalcone-flavanone isomerase family protein, GeneName=FAP2	IPR016087_Chalcone isomerase; IPR036298_Chalcone isomerase superfamily	CHI	9.55	14.7333	10.1667	15.23	3.08	18.01	7.56	12.44	17.53	14.23	8.45	12.23	9.82	20.25	10.97	14.47
		Am_Tr_006024	1483	Q8H0G1.1_RecName: Full=Chalcone--flavanone isomerase 2; Short=Chalcone isomerase 2 [Lotus japonicus] BAC53984.1 putative chalcone isomerase [Lotus japonicus]	AT3G55120.1_Chalcone-flavanone isomerase family protein, GeneName=TT5	IPR036298_Chalcone isomerase superfamily; IPR016087_Chalcone isomerase	CHI	6.33333	32.9167	44.06	42.7333	2.72	13.83	2.45	24.61	38.6	35.54	50.68	40.46	41.04	36.6	37.85	53.75
		Am_Tr_041072	1226	XP_045801107.1_fatty-acid-binding protein 3, chloroplastic [Trifolium pratense]	AT1G53520.1_Chalcone-flavanone isomerase family protein, GeneName=FAP3	IPR036298_Chalcone isomerase superfamily; IPR016087_Chalcone isomerase	CHI	0	12.0267	18.5167	4.59333	0	0	0	6.26	14.32	15.5	20.5	17.2	17.85	2.65	2.52	8.61
		Am_Tr_061094	1211	XP_013461511.2_probable chalcone--flavonone isomerase 3 [Medicago truncatula] AFK36813.1 unknown [Medicago truncatula]	AT5G05270.1_Chalcone-flavanone isomerase family protein, GeneName=CHIL	IPR016087_Chalcone isomerase; IPR036298_Chalcone isomerase superfamily	CHI	936.317	158.1	259.983	215.32	1492.79	630.71	685.45	138.15	170.57	165.58	236.9	245.68	297.37	205.75	230.25	209.96
		Am_Tr_041071	1043	PNY14782.1_chalcone-flavonone isomerase 2-like protein [Trifolium pratense]	AT1G53520.1_Chalcone-flavanone isomerase family protein, GeneName=FAP3	IPR036298_Chalcone isomerase superfamily; IPR016087_Chalcone isomerase	CHI	0	7.10667	2.76333	2.31667	0	0	0	18.62	2.24	0.46	5.87	0.94	1.48	6.95	0	0
Iso-seq	3	Am_HQ_21462	2763	AEH68209.1_isoflavone synthase [Astragalus mongholicus] AEQ39024.1 isoflavone synthase [Astragalus membranaceus] AEV91333.1 isolfavone synthase 2 [Astragalus mongholicus]	AT5G06900.1_cytochrome P450, family 93, subfamily D, polypeptide 1, GeneName=CYP93D1	IPR002401_Cytochrome P450, E-class, group I; IPR001128_Cytochrome P450; IPR036396_Cytochrome P450 superfamily	IFS	101.747	90.1333	58.12	46.55	45.88	228.98	30.38	70	100.76	99.64	24.01	54.29	96.06	55.17	45.44	39.04
		Am_HQ_41791	2106	AEH68209.1_isoflavone synthase [Astragalus mongholicus] AEQ39024.1 isoflavone synthase [Astragalus membranaceus] AEV91333.1 isolfavone synthase 2 [Astragalus mongholicus]	AT2G45560.1_cytochrome P450, family 76, subfamily C, polypeptide 1, GeneName=CYP76C1	IPR036396_Cytochrome P450 superfamily; IPR001128_Cytochrome P450	IFS	637.51	578.843	412.147	336.973	381.13	1331.12	200.28	438.15	604.03	694.35	272.42	380.41	583.61	393.26	317.37	300.29
		Am_HQ_42345	2178	AFC88270.1_isoflavone synthase 1 [Astragalus membranaceus]	AT3G20960.1_cytochrome P450, family 705, subfamily A, polypeptide 33, GeneName=CYP705A33	IPR001128_Cytochrome P450; IPR036396_Cytochrome P450 superfamily	IFS	257.65	230.527	145.58	122.377	135.02	562.4	75.53	182.63	242.05	266.9	56.69	151.7	228.35	127.97	128.86	110.3
rnaSPAdes	4	Am_Rn_010690	4247	AEH68209.1_isoflavone synthase [Astragalus mongholicus] AEQ39024.1 isoflavone synthase [Astragalus membranaceus] AEV91333.1 isolfavone synthase 2 [Astragalus mongholicus]	AT2G45560.1_cytochrome P450, family 76, subfamily C, polypeptide 1, GeneName=CYP76C1	IPR036396_Cytochrome P450 superfamily; IPR001128_Cytochrome P450	IFS	103.857	111.697	54.4133	57.5133	82.31	199.72	29.54	65.27	129.53	140.29	33	57.69	72.55	65.9	53.05	53.59
		Am_Rn_012564	4020	AEH68209.1_isoflavone synthase [Astragalus mongholicus] AEQ39024.1 isoflavone synthase [Astragalus membranaceus] AEV91333.1 isolfavone synthase 2 [Astragalus mongholicus]	AT5G06900.1_cytochrome P450, family 93, subfamily D, polypeptide 1, GeneName=CYP93D1	IPR001128_Cytochrome P450; IPR036396_Cytochrome P450 superfamily; IPR002401_Cytochrome P450, E-class, group I	IFS	98.5067	82.2233	72.33	59.1167	46.47	222.7	26.35	78.29	62.14	106.24	68.82	53.01	95.16	88.76	51.46	37.13
		Am_Rn_019398	3410	AEH68209.1_isoflavone synthase [Astragalus mongholicus] AEQ39024.1 isoflavone synthase [Astragalus membranaceus] AEV91333.1 isolfavone synthase 2 [Astragalus mongholicus]	AT4G31480.1_Coatomer, beta subunit	IPR001128_Cytochrome P450; IPR002401_Cytochrome P450, E-class, group I; IPR036396_Cytochrome P450 superfamily	IFS	129.243	164.77	146.113	177.38	84.76	212.17	90.8	134.89	177.86	181.56	89.32	172.67	176.35	203.13	166.87	162.14
		Am_Rn_033321	2631	AEH68209.1_isoflavone synthase [Astragalus mongholicus] AEQ39024.1 isoflavone synthase [Astragalus membranaceus] AEV91333.1 isolfavone synthase 2 [Astragalus mongholicus]	AT2G42250.1_cytochrome P450, family 712, subfamily A, polypeptide 1, GeneName=CYP712A1	IPR036396_Cytochrome P450 superfamily; IPR001128_Cytochrome P450; IPR002401_Cytochrome P450, E-class, group I	IFS	348.303	345.573	152.723	86.4667	162.09	845.37	37.45	270.46	365.71	400.55	1.21	144.88	312.08	53.28	112.64	93.48
Trinity	4	Am_Tr_109942	2671	AEH68209.1_isoflavone synthase [Astragalus mongholicus] AEQ39024.1 isoflavone synthase [Astragalus membranaceus] AEV91333.1 isolfavone synthase 2 [Astragalus mongholicus]	AT2G45560.1_cytochrome P450, family 76, subfamily C, polypeptide 1, GeneName=CYP76C1	IPR036396_Cytochrome P450 superfamily; IPR001128_Cytochrome P450	IFS	5.59333	6.31667	3.57667	1.99	10.75	3.06	2.97	3.86	8.41	6.68	4.08	1.94	4.71	2.92	2.01	1.04
		Am_Tr_109934	2550	AEH68209.1_isoflavone synthase [Astragalus mongholicus] AEQ39024.1 isoflavone synthase [Astragalus membranaceus] AEV91333.1 isolfavone synthase 2 [Astragalus mongholicus]	AT5G06900.1_cytochrome P450, family 93, subfamily D, polypeptide 1, GeneName=CYP93D1	IPR002401_Cytochrome P450, E-class, group I; IPR001128_Cytochrome P450; IPR036396_Cytochrome P450 superfamily	IFS	755.867	644.02	394.603	200.717	410.33	1635.72	221.55	502.1	644.85	785.11	196.23	396.05	591.53	357.72	174.41	70.02
		Am_Tr_109939	2298	AFC88270.1_isoflavone synthase 1 [Astragalus membranaceus]	AT2G45560.1_cytochrome P450, family 76, subfamily C, polypeptide 1, GeneName=CYP76C1	IPR001128_Cytochrome P450; IPR002401_Cytochrome P450, E-class, group I; IPR036396_Cytochrome P450 superfamily	IFS	22.3433	3.09333	3.13333	237.5	15	43.67	8.36	0.09	2.81	6.38	2.52	4.73	2.15	161.78	249.24	301.48
		Am_Tr_109935	2284	AEH68209.1_isoflavone synthase [Astragalus mongholicus] AEQ39024.1 isoflavone synthase [Astragalus membranaceus] AEV91333.1 isolfavone synthase 2 [Astragalus mongholicus]	AT5G06900.1_cytochrome P450, family 93, subfamily D, polypeptide 1, GeneName=CYP93D1	IPR001128_Cytochrome P450; IPR036396_Cytochrome P450 superfamily; IPR002401_Cytochrome P450, E-class, group I	IFS	9.02333	36.97	12.04	115.57	6.9	18.84	1.33	23.93	58.28	28.7	0	9.84	26.28	2.96	135.65	208.1
Iso-seq	3	Am_HQ_79972	1344	Q5NUF4.1_RecName: Full=2-hydroxyisoflavanone dehydratase; AltName: Full=Carboxylesterase HIDM [Glycyrrhiza echinata] BAD80839.1 2-Hydroxyisoflavanone dehydratase [Glycyrrhiza echinata]	AT3G48690.1_alpha/beta-Hydrolases superfamily protein, GeneName=CXE12	IPR013094_Alpha/beta hydrolase fold-3; IPR029058_Alpha/Beta hydrolase fold	2HID	253.15	44.5667	149.153	67.6	249.88	172.08	337.49	28.24	45.85	59.61	103.48	157.99	185.99	70.56	54.04	78.2
		Am_HQ_82955	1232	XP_003610679.2_2-hydroxyisoflavanone dehydratase [Medicago truncatula]	AT1G47480.1_alpha/beta-Hydrolases superfamily protein	IPR013094_Alpha/beta hydrolase fold-3; IPR029058_Alpha/Beta hydrolase fold	2HID	33.09	46.06	23.31	21.98	26.98	42.81	29.48	24.77	51.65	61.76	18.23	23.3	28.4	16.3	22.58	27.06
		Am_HQ_84997	1167	XP_004516320.1_2-hydroxyisoflavanone dehydratase-like [Cicer arietinum]	AT1G19190.1_alpha/beta-Hydrolases superfamily protein	IPR013094_Alpha/beta hydrolase fold-3; IPR029058_Alpha/Beta hydrolase fold	2HID	0.716667	4.89667	18.4833	16.75	0.22	1.75	0.18	3.25	8.55	2.89	40.18	8.88	6.39	24.02	6.76	19.47
rnaSPAdes	3	Am_Rn_050193	1998	Q5NUF4.1_RecName: Full=2-hydroxyisoflavanone dehydratase; AltName: Full=Carboxylesterase HIDM [Glycyrrhiza echinata] BAD80839.1 2-Hydroxyisoflavanone dehydratase [Glycyrrhiza echinata]	AT3G48690.1_alpha/beta-Hydrolases superfamily protein, GeneName=CXE12	IPR013094_Alpha/beta hydrolase fold-3; IPR029058_Alpha/Beta hydrolase fold	2HID	158.27	32.87	97.25	49.4733	165.13	111.86	197.82	20.9	33.29	44.42	57.34	108.99	125.42	50.71	40.16	57.55
		Am_Rn_072537	1368	XP_004516320.1_2-hydroxyisoflavanone dehydratase-like [Cicer arietinum]	AT1G19190.1_alpha/beta-Hydrolases superfamily protein	IPR013094_Alpha/beta hydrolase fold-3; IPR029058_Alpha/Beta hydrolase fold	2HID	0.603333	4.75667	14.5567	16.1733	0.19	1.48	0.14	3.14	8.33	2.8	29.68	8.39	5.6	23.32	6.55	18.65
		Am_Rn_074473	1322	XP_003610679.2_2-hydroxyisoflavanone dehydratase [Medicago truncatula]	AT1G47480.1_alpha/beta-Hydrolases superfamily protein	IPR013094_Alpha/beta hydrolase fold-3; IPR029058_Alpha/Beta hydrolase fold	2HID	29.5533	48.0133	21.31	22.5633	25.02	39.13	24.51	26.07	52.06	65.91	13.85	22.97	27.11	16.94	22.94	27.81
Trinity	4	Am_Tr_080568	1688	Q5NUF4.1_RecName: Full=2-hydroxyisoflavanone dehydratase; AltName: Full=Carboxylesterase HIDM [Glycyrrhiza echinata] BAD80839.1 2-Hydroxyisoflavanone dehydratase [Glycyrrhiza echinata]	AT3G48690.1_alpha/beta-Hydrolases superfamily protein, GeneName=CXE12	IPR013094_Alpha/beta hydrolase fold-3; IPR029058_Alpha/Beta hydrolase fold	2HID	5.77	1.78333	7.27667	2.02667	4.17	2.64	10.5	1.08	1.63	2.64	4.94	6.37	10.52	1.5	2.3	2.28
		Am_Tr_080569	1434	Q5NUF4.1_RecName: Full=2-hydroxyisoflavanone dehydratase; AltName: Full=Carboxylesterase HIDM [Glycyrrhiza echinata] BAD80839.1 2-Hydroxyisoflavanone dehydratase [Glycyrrhiza echinata]	AT3G48690.1_alpha/beta-Hydrolases superfamily protein, GeneName=CXE12	IPR013094_Alpha/beta hydrolase fold-3; IPR029058_Alpha/Beta hydrolase fold	2HID	205.89	35.0233	100.073	52.4133	208	144.86	264.81	22.27	35.41	47.39	60.15	113.28	126.79	54.88	41.45	60.91
		Am_Tr_113029	1335	XP_004516320.1_2-hydroxyisoflavanone dehydratase-like [Cicer arietinum]	AT1G19190.1_alpha/beta-Hydrolases superfamily protein	IPR013094_Alpha/beta hydrolase fold-3; IPR029058_Alpha/Beta hydrolase fold	2HID	0.563333	3.53	11.57	12.0433	0.17	1.38	0.14	2.31	6.57	1.71	23.79	6.55	4.37	16.97	5.08	14.08
		Am_Tr_109045	1264	XP_003610679.2_2-hydroxyisoflavanone dehydratase [Medicago truncatula]	AT1G47480.1_alpha/beta-Hydrolases superfamily protein	IPR013094_Alpha/beta hydrolase fold-3; IPR029058_Alpha/Beta hydrolase fold	2HID	28.8333	40.0733	17.6767	18.4767	24.12	37.04	25.34	21.72	43.48	55.02	12.13	18.65	22.25	13.54	18.83	23.06
Iso-seq	6	Am_HQ_64799	1714	Q84KK6.1_RecName: Full=Isoflavone 4&apos;-O-methyltransferase; Short=GeHI4&apos;OMT; AltName: Full=2,7,4&apos;-trihydroxyisoflavanone 4&apos;-O-methyltransferase; AltName: Full=S-adenosyl-L-methionine:2,7,4&apos;-trihydroxyisoflavanone 4&apos;-O-methyltransferase [Glycyrrhiza echinata] BAC58011.1 S-adenosyl-L-methionine: 2,7,4&apos;-trihydroxyisoflavanone 4&apos;-O-methyltransferase [Glycyrrhiza …	AT4G35160.1_O-methyltransferase family protein	IPR001077_O-methyltransferase domain; IPR036390_Winged helix DNA-binding domain superfamily; IPR016461_O-methyltransferase COMT-type; IPR012967_Plant methyltransferase dimerisation; IPR029063_S-adenosyl-L-methionine-dependent methyltransferase	IOMT	195.437	104.01	85.4433	99.7433	193.47	302.93	89.91	60.54	125.74	125.75	39.27	86.08	130.98	98.61	95.81	104.81
		Am_HQ_68183	1648	ATY39976.1_Isoflavone O-methyltransferase [Astragalus membranaceus]	AT4G35160.1_O-methyltransferase family protein	IPR012967_Plant methyltransferase dimerisation; IPR001077_O-methyltransferase domain; IPR029063_S-adenosyl-L-methionine-dependent methyltransferase; IPR036390_Winged helix DNA-binding domain superfamily	IOMT	6.49667	6.97333	3.60333	3.11333	11.06	5.54	2.89	3.73	7.99	9.2	1.53	3.65	5.63	2.08	4.63	2.63
		Am_HQ_69248	1538	ATY39976.1_Isoflavone O-methyltransferase [Astragalus membranaceus]	AT4G35160.1_O-methyltransferase family protein	IPR036390_Winged helix DNA-binding domain superfamily; IPR001077_O-methyltransferase domain; IPR016461_O-methyltransferase COMT-type; IPR029063_S-adenosyl-L-methionine-dependent methyltransferase; IPR012967_Plant methyltransferase dimerisation	IOMT	32.7	87.44	49.2933	17.4667	36.88	34.41	26.81	42.72	86.82	132.78	23.17	63.41	61.3	13.11	21.63	17.66
		Am_HQ_81055	1300	Q84KK6.1_RecName: Full=Isoflavone 4&apos;-O-methyltransferase; Short=GeHI4&apos;OMT; AltName: Full=2,7,4&apos;-trihydroxyisoflavanone 4&apos;-O-methyltransferase; AltName: Full=S-adenosyl-L-methionine:2,7,4&apos;-trihydroxyisoflavanone 4&apos;-O-methyltransferase [Glycyrrhiza echinata] BAC58011.1 S-adenosyl-L-methionine: 2,7,4&apos;-trihydroxyisoflavanone 4&apos;-O-methyltransferase [Glycyrrhiza …	AT4G35160.1_O-methyltransferase family protein	IPR036390_Winged helix DNA-binding domain superfamily; IPR016461_O-methyltransferase COMT-type; IPR029063_S-adenosyl-L-methionine-dependent methyltransferase; IPR001077_O-methyltransferase domain; IPR012967_Plant methyltransferase dimerisation	IOMT	16.13	7.64	16.3833	5.10667	5.93	37.7	4.76	6.66	8.82	7.44	17.95	5.06	26.14	6.11	1.12	8.09
		Am_HQ_81501	1225	ATY39976.1_Isoflavone O-methyltransferase [Astragalus membranaceus]	AT4G35160.1_O-methyltransferase family protein	IPR012967_Plant methyltransferase dimerisation; IPR016461_O-methyltransferase COMT-type; IPR036390_Winged helix DNA-binding domain superfamily; IPR001077_O-methyltransferase domain; IPR029063_S-adenosyl-L-methionine-dependent methyltransferase	IOMT	124.5	184.133	76.6233	94.7067	144.96	104.62	123.92	109.07	184.02	259.31	36.85	94.87	98.15	51.42	135.56	97.14
		Am_HQ_84308	1197	TKY50287.1_Isoflavone 7-O-methyltransferase [Spatholobus suberectus]	AT4G35160.1_O-methyltransferase family protein	IPR001077_O-methyltransferase domain; IPR029063_S-adenosyl-L-methionine-dependent methyltransferase; IPR036390_Winged helix DNA-binding domain superfamily; IPR016461_O-methyltransferase COMT-type; IPR012967_Plant methyltransferase dimerisation	IOMT	0.13	8.57	64.1467	0.563333	0	0.21	0.18	2.31	20.97	2.43	76	54.09	62.35	0.34	0.79	0.56
rnaSPAdes	7	Am_Rn_037509	2453	ATY39976.1_Isoflavone O-methyltransferase [Astragalus membranaceus]	AT4G35160.1_O-methyltransferase family protein	IPR012967_Plant methyltransferase dimerisation; IPR001077_O-methyltransferase domain; IPR029063_S-adenosyl-L-methionine-dependent methyltransferase; IPR036390_Winged helix DNA-binding domain superfamily	IOMT	4.70333	5.45333	2.63667	2.68	8.22	3.82	2.07	2.96	5.81	7.59	0.93	2.57	4.41	1.79	3.86	2.39
		Am_Rn_042799	2250	AID51450.1_isoflavone O-methyltransferase [Astragalus membranaceus]	AT4G35160.1_O-methyltransferase family protein	IPR029063_S-adenosyl-L-methionine-dependent methyltransferase; IPR001077_O-methyltransferase domain; IPR036390_Winged helix DNA-binding domain superfamily; IPR012967_Plant methyltransferase dimerisation	IOMT	10.6067	0.276667	0.136667	0.293333	20.2	3.69	7.93	0.51	0.24	0.08	0.05	0.12	0.24	0.56	0	0.32
		Am_Rn_047303	2093	Q84KK6.1_RecName: Full=Isoflavone 4&apos;-O-methyltransferase; Short=GeHI4&apos;OMT; AltName: Full=2,7,4&apos;-trihydroxyisoflavanone 4&apos;-O-methyltransferase; AltName: Full=S-adenosyl-L-methionine:2,7,4&apos;-trihydroxyisoflavanone 4&apos;-O-methyltransferase [Glycyrrhiza echinata] BAC58011.1 S-adenosyl-L-methionine: 2,7,4&apos;-trihydroxyisoflavanone 4&apos;-O-methyltransferase [Glycyrrhiza …	AT4G35160.1_O-methyltransferase family protein	IPR001077_O-methyltransferase domain; IPR036390_Winged helix DNA-binding domain superfamily; IPR016461_O-methyltransferase COMT-type; IPR012967_Plant methyltransferase dimerisation; IPR029063_S-adenosyl-L-methionine-dependent methyltransferase	IOMT	156.09	95.0167	69.8367	90.7767	155.36	246.93	65.98	55.64	112.81	116.6	26.7	73.53	109.28	88.2	88.59	95.54
		Am_Rn_049748	2013	Q84KK5.1_RecName: Full=Isoflavone 7-O-methyltransferase; AltName: Full=Daidzein 7-O-methyltransferase [Glycyrrhiza echinata] BAC58012.1 S-adenosyl-L-methionine: daidzein 7-0-methyltransferase [Glycyrrhiza echinata]	AT5G54160.1_O-methyltransferase 1, GeneName=OMT1	IPR029063_S-adenosyl-L-methionine-dependent methyltransferase; IPR036390_Winged helix DNA-binding domain superfamily; IPR001077_O-methyltransferase domain; IPR012967_Plant methyltransferase dimerisation	IOMT	19.45	63.21	32.2933	13.05	23.27	21.25	13.83	31.36	62.63	95.64	11.99	43.91	40.98	9.45	16.79	12.91
		Am_Rn_050644	1984	ATY39976.1_Isoflavone O-methyltransferase [Astragalus membranaceus]	AT4G35160.1_O-methyltransferase family protein	IPR012967_Plant methyltransferase dimerisation; IPR016461_O-methyltransferase COMT-type; IPR036390_Winged helix DNA-binding domain superfamily; IPR001077_O-methyltransferase domain; IPR029063_S-adenosyl-L-methionine-dependent methyltransferase	IOMT	73.3267	131.727	49.75	64.4933	88.06	64.14	67.78	77.66	127.71	189.81	19.94	64.31	65	34.2	93	66.28
		Am_Rn_064183	1582	Q84KK6.1_RecName: Full=Isoflavone 4&apos;-O-methyltransferase; Short=GeHI4&apos;OMT; AltName: Full=2,7,4&apos;-trihydroxyisoflavanone 4&apos;-O-methyltransferase; AltName: Full=S-adenosyl-L-methionine:2,7,4&apos;-trihydroxyisoflavanone 4&apos;-O-methyltransferase [Glycyrrhiza echinata] BAC58011.1 S-adenosyl-L-methionine: 2,7,4&apos;-trihydroxyisoflavanone 4&apos;-O-methyltransferase [Glycyrrhiza …	AT4G35160.1_O-methyltransferase family protein	IPR016461_O-methyltransferase COMT-type; IPR001077_O-methyltransferase domain; IPR036390_Winged helix DNA-binding domain superfamily; IPR012967_Plant methyltransferase dimerisation; IPR029063_S-adenosyl-L-methionine-dependent methyltransferase	IOMT	12.7333	6.8	12.5033	4.50333	4.91	30	3.29	5.79	7.77	6.84	12.07	4.19	21.25	5.15	1.05	7.31
		Am_Rn_070875	1409	TKY50287.1_Isoflavone 7-O-methyltransferase [Spatholobus suberectus]	AT4G35160.1_O-methyltransferase family protein	IPR001077_O-methyltransferase domain; IPR029063_S-adenosyl-L-methionine-dependent methyltransferase; IPR036390_Winged helix DNA-binding domain superfamily; IPR016461_O-methyltransferase COMT-type; IPR012967_Plant methyltransferase dimerisation	IOMT	0.0466667	8.51333	54.1933	0.533333	0	0	0.14	2.04	21.02	2.48	57.42	50.3	54.86	0.31	0.76	0.53
Trinity	7	Am_Tr_148597	2093	Q84KK6.1_RecName: Full=Isoflavone 4&apos;-O-methyltransferase; Short=GeHI4&apos;OMT; AltName: Full=2,7,4&apos;-trihydroxyisoflavanone 4&apos;-O-methyltransferase; AltName: Full=S-adenosyl-L-methionine:2,7,4&apos;-trihydroxyisoflavanone 4&apos;-O-methyltransferase [Glycyrrhiza echinata] BAC58011.1 S-adenosyl-L-methionine: 2,7,4&apos;-trihydroxyisoflavanone 4&apos;-O-methyltransferase [Glycyrrhiza …	AT4G35160.1_O-methyltransferase family protein	IPR001077_O-methyltransferase domain; IPR036390_Winged helix DNA-binding domain superfamily; IPR016461_O-methyltransferase COMT-type; IPR012967_Plant methyltransferase dimerisation; IPR029063_S-adenosyl-L-methionine-dependent methyltransferase	IOMT	141.143	73.3667	53.2967	68.9567	137.09	223.12	63.22	42.87	86.43	90.8	21.05	55.78	83.06	67.63	66.71	72.53
		Am_Tr_020574	2072	ATY39976.1_Isoflavone O-methyltransferase [Astragalus membranaceus]	AT4G35160.1_O-methyltransferase family protein	IPR001077_O-methyltransferase domain; IPR012967_Plant methyltransferase dimerisation; IPR029063_S-adenosyl-L-methionine-dependent methyltransferase; IPR016461_O-methyltransferase COMT-type; IPR036390_Winged helix DNA-binding domain superfamily	IOMT	17.8	49.9267	24.2733	8.91	19.38	18.69	15.33	21.73	45.32	82.73	8.02	32.86	31.94	4.6	11.39	10.74
		Am_Tr_020571	1836	ATY39976.1_Isoflavone O-methyltransferase [Astragalus membranaceus]	AT4G35160.1_O-methyltransferase family protein	IPR012967_Plant methyltransferase dimerisation; IPR016461_O-methyltransferase COMT-type; IPR036390_Winged helix DNA-binding domain superfamily; IPR001077_O-methyltransferase domain; IPR029063_S-adenosyl-L-methionine-dependent methyltransferase	IOMT	69.8933	102.943	37.67	52.04	81.49	60.23	67.96	61.1	100.53	147.2	16.07	48.17	48.77	27.82	74.87	53.43
		Am_Tr_148594	1535	Q84KK6.1_RecName: Full=Isoflavone 4&apos;-O-methyltransferase; Short=GeHI4&apos;OMT; AltName: Full=2,7,4&apos;-trihydroxyisoflavanone 4&apos;-O-methyltransferase; AltName: Full=S-adenosyl-L-methionine:2,7,4&apos;-trihydroxyisoflavanone 4&apos;-O-methyltransferase [Glycyrrhiza echinata] BAC58011.1 S-adenosyl-L-methionine: 2,7,4&apos;-trihydroxyisoflavanone 4&apos;-O-methyltransferase [Glycyrrhiza …	AT4G35160.1_O-methyltransferase family protein	IPR016461_O-methyltransferase COMT-type; IPR001077_O-methyltransferase domain; IPR012967_Plant methyltransferase dimerisation; IPR036390_Winged helix DNA-binding domain superfamily; IPR029063_S-adenosyl-L-methionine-dependent methyltransferase	IOMT	12.1967	5.47667	10.17	3.50667	4.55	28.58	3.46	4.93	6.01	5.49	10.12	3.25	17.14	4.09	0.68	5.75
		Am_Tr_118861	1426	AID51450.1_isoflavone O-methyltransferase [Astragalus membranaceus]	AT4G35160.1_O-methyltransferase family protein	IPR001077_O-methyltransferase domain; IPR036390_Winged helix DNA-binding domain superfamily; IPR029063_S-adenosyl-L-methionine-dependent methyltransferase; IPR012967_Plant methyltransferase dimerisation	IOMT	11.66	0.33	0.18	0.356667	19.39	5.49	10.1	0.54	0.17	0.28	0.07	0	0.47	0.59	0	0.48
		Am_Tr_148267	1311	TKY50287.1_Isoflavone 7-O-methyltransferase [Spatholobus suberectus]	AT4G35160.1_O-methyltransferase family protein	IPR001077_O-methyltransferase domain; IPR029063_S-adenosyl-L-methionine-dependent methyltransferase; IPR036390_Winged helix DNA-binding domain superfamily; IPR016461_O-methyltransferase COMT-type; IPR012967_Plant methyltransferase dimerisation	IOMT	0.0466667	7.23	45.3167	0.383333	0	0	0.14	1.92	17.55	2.22	48.7	41.57	45.68	0.26	0.63	0.26
		Am_Tr_241121	698	ATY39976.1_Isoflavone O-methyltransferase [Astragalus membranaceus]	.	.	IOMT	5.3	15.51	6.95	3.53333	6.19	6.6	3.11	7.23	12.75	26.55	0.99	7.58	12.28	2.83	5.11	2.66
Iso-seq	2	Am_HQ_78201	1364	AEF14415.1_flavanone 3-hydroxylase [Onobrychis viciifolia]	AT3G51240.1_flavanone 3-hydroxylase, GeneName=F3H	IPR044861_Isopenicillin N synthase-like, Fe(2+) 2OG dioxygenase domain; IPR026992_Non-haem dioxygenase N-terminal domain	F3H	0	49.6	229.01	7.28	0	0	0	46.97	70.95	30.88	310.62	198	178.41	9.9	0.77	11.17
		Am_HQ_78913	1375	TKY59134.1_Flavanone 3-dioxygenase [Spatholobus suberectus]	AT3G19000.1_2-oxoglutarate (2OG) and Fe(II)-dependent oxygenase superfamily protein	IPR044861_Isopenicillin N synthase-like, Fe(2+) 2OG dioxygenase domain; IPR026992_Non-haem dioxygenase N-terminal domain	F3H	0.476667	16.74	2.72333	2.27333	0.12	0.94	0.37	24.33	21.41	4.48	2.89	3.59	1.69	1.57	4.38	0.87
rnaSPAdes	1	Am_Rn_064879	1562	AEF14415.1_flavanone 3-hydroxylase [Onobrychis viciifolia]	AT3G51240.1_flavanone 3-hydroxylase, GeneName=F3H	IPR044861_Isopenicillin N synthase-like, Fe(2+) 2OG dioxygenase domain; IPR026992_Non-haem dioxygenase N-terminal domain	F3H	0	49.2533	191.17	7.16333	0	0	0	46.88	70.05	30.83	229.4	183.36	160.75	9.59	0.87	11.03
Trinity	3	Am_Tr_110462	1567	AEF14415.1_flavanone 3-hydroxylase [Onobrychis viciifolia]	AT3G51240.1_flavanone 3-hydroxylase, GeneName=F3H	IPR044861_Isopenicillin N synthase-like, Fe(2+) 2OG dioxygenase domain; IPR026992_Non-haem dioxygenase N-terminal domain	F3H	0	37.64	147.277	5.37333	0	0	0	35.9	53.07	23.95	180.53	139.02	122.28	7.29	0.58	8.25
		Am_Tr_065564	1152	TKY59134.1_Flavanone 3-dioxygenase [Spatholobus suberectus]	AT3G19000.2_2-oxoglutarate (2OG) and Fe(II)-dependent oxygenase superfamily protein	IPR026992_Non-haem dioxygenase N-terminal domain; IPR044861_Isopenicillin N synthase-like, Fe(2+) 2OG dioxygenase domain	F3H	0.0433333	5.49	0.333333	0.236667	0	0.13	0	6.96	2.43	7.08	0.25	0	0.75	0.37	0.34	0
		Am_Tr_030096	633	TKY59134.1_Flavanone 3-dioxygenase [Spatholobus suberectus]	AT3G19000.1_2-oxoglutarate (2OG) and Fe(II)-dependent oxygenase superfamily protein	IPR044861_Isopenicillin N synthase-like, Fe(2+) 2OG dioxygenase domain	F3H	0.02	12.5	2.09667	0.973333	0	0.02	0.04	19.3	14.63	3.57	2.85	2.11	1.33	0.25	1.29	1.38
Iso-seq	3	Am_HQ_82005	1280	TKY73761.1_Flavonol synthase/flavanone 3-hydroxylase [Spatholobus suberectus]	AT5G08640.1_flavonol synthase 1, GeneName=FLS1	IPR026992_Non-haem dioxygenase N-terminal domain	FLS	0	8.92333	18.4767	0.103333	0	0	0	10.63	9.26	6.88	31.21	7.44	16.78	0	0.31	0
		Am_HQ_83112	1226	AEF14416.1_flavonol synthase [Onobrychis viciifolia]	AT5G08640.1_flavonol synthase 1, GeneName=FLS1	IPR044861_Isopenicillin N synthase-like, Fe(2+) 2OG dioxygenase domain; IPR026992_Non-haem dioxygenase N-terminal domain	FLS	0.503333	141.187	177.553	12.2567	0	0.21	1.3	123.95	170.45	129.16	240.49	137.3	154.87	15.85	8.23	12.69
		Am_HQ_83674	1205	TKY73761.1_Flavonol synthase/flavanone 3-hydroxylase [Spatholobus suberectus]	AT5G08640.1_flavonol synthase 1, GeneName=FLS1	IPR026992_Non-haem dioxygenase N-terminal domain; IPR044861_Isopenicillin N synthase-like, Fe(2+) 2OG dioxygenase domain	FLS	0	95.7133	278.717	2.97667	0	0	0	109	81.8	96.34	330.99	227.75	277.41	1.34	4.71	2.88
rnaSPAdes	4	Am_Rn_013725	3892	XP_013466706.1_flavonol synthase/flavanone 3-hydroxylase [Medicago truncatula] KEH40747.1 gibberellin 2-beta-dioxygenase [Medicago truncatula]	AT3G19000.2_2-oxoglutarate (2OG) and Fe(II)-dependent oxygenase superfamily protein	IPR044861_Isopenicillin N synthase-like, Fe(2+) 2OG dioxygenase domain; IPR026992_Non-haem dioxygenase N-terminal domain	FLS	0.126667	0.41	0.203333	27.4767	0.04	0.23	0.11	0.44	0.46	0.33	0.04	0.29	0.28	15.32	36.7	30.41
		Am_Rn_048342	2058	TKY73761.1_Flavonol synthase/flavanone 3-hydroxylase [Spatholobus suberectus]	AT5G08640.1_flavonol synthase 1, GeneName=FLS1	IPR026992_Non-haem dioxygenase N-terminal domain	FLS	0	5.54333	9.03	0.0766667	0	0	0	5.91	5.95	4.77	13.24	5.6	8.25	0.11	0.12	0
		Am_Rn_058219	1750	AEF14416.1_flavonol synthase [Onobrychis viciifolia]	AT5G08640.1_flavonol synthase 1, GeneName=FLS1	IPR044861_Isopenicillin N synthase-like, Fe(2+) 2OG dioxygenase domain; IPR026992_Non-haem dioxygenase N-terminal domain	FLS	0.3	106.923	114.063	9.43667	0	0.14	0.76	92.09	127.98	100.7	136.4	98.32	107.47	11.99	6.45	9.87
		Am_Rn_065503	1545	TKY73761.1_Flavonol synthase/flavanone 3-hydroxylase [Spatholobus suberectus]	AT5G08640.1_flavonol synthase 1, GeneName=FLS1	IPR026992_Non-haem dioxygenase N-terminal domain; IPR044861_Isopenicillin N synthase-like, Fe(2+) 2OG dioxygenase domain	FLS	0	86.1067	213.09	2.6	0	0	0	98.88	73.02	86.42	224.6	187.76	226.91	1.06	4.25	2.49
Trinity	3	Am_Tr_032686	1927	TKY73761.1_Flavonol synthase/flavanone 3-hydroxylase [Spatholobus suberectus]	AT5G08640.1_flavonol synthase 1, GeneName=FLS1	IPR026992_Non-haem dioxygenase N-terminal domain	FLS	0	2.86667	5.51333	0.0566667	0	0	0	3.08	1.45	4.07	7.93	0.09	8.52	0	0.17	0
		Am_Tr_032687	1771	TKY73761.1_Flavonol synthase/flavanone 3-hydroxylase [Spatholobus suberectus]	AT5G08640.1_flavonol synthase 1, GeneName=FLS1	IPR026992_Non-haem dioxygenase N-terminal domain; IPR044861_Isopenicillin N synthase-like, Fe(2+) 2OG dioxygenase domain	FLS	0	54.49	135.513	1.69	0	0	0	63.03	46.71	53.73	144.9	121.52	140.12	0.69	2.64	1.74
		Am_Tr_159864	1708	AEF14416.1_flavonol synthase [Onobrychis viciifolia]	AT5G08640.1_flavonol synthase 1, GeneName=FLS1	IPR044861_Isopenicillin N synthase-like, Fe(2+) 2OG dioxygenase domain; IPR026992_Non-haem dioxygenase N-terminal domain	FLS	0.303333	86.0233	91.4567	7.48	0	0.13	0.78	76.21	101.25	80.61	113	76.85	84.52	9.76	4.99	7.69
rnaSPAdes	1	Am_Rn_030015	2787	AEF14420.1_dihydroflavonol 4-reductase [Onobrychis viciifolia]	AT5G42800.1_dihydroflavonol 4-reductase, GeneName=DFR	IPR036291_NAD(P)-binding domain superfamily; IPR001509_NAD-dependent epimerase/dehydratase	DFR	0.53	1.41	5.37333	5.47	0.58	0.76	0.25	0.44	2.54	1.25	4.35	7.18	4.59	5.39	0.12	10.9
Trinity	3	Am_Tr_143093	1344	AEF14420.1_dihydroflavonol 4-reductase [Onobrychis viciifolia]	AT5G42800.1_dihydroflavonol 4-reductase, GeneName=DFR	IPR036291_NAD(P)-binding domain superfamily; IPR001509_NAD-dependent epimerase/dehydratase	DFR	0.0566667	0.276667	7.56667	7.30333	0	0.17	0	0	0.83	0	6.69	9.76	6.25	7.11	0	14.8
		Am_Tr_068814	607	MCI02260.1_dihydroflavonol-4-reductase [Trifolium medium]	AT5G42800.1_dihydroflavonol 4-reductase, GeneName=DFR	.	DFR	4.65667	4.54	2.48667	5.10667	6.6	2.59	4.78	4.03	6.14	3.45	2.53	2	2.93	7.42	4.74	3.16
		Am_Tr_302384	201	XP_041349320.1_putative dihydroflavonol 4-reductase [Gigantopelta aegis]	.	.	DFR	0	0	5.80667	0	0	0	0	0	0	0	17.42	0	0	0	0	0
Iso-seq	1	Am_HQ_75882	1374	AEF14411.1_anthocyanidin synthase [Onobrychis viciifolia]	AT4G22880.2_leucoanthocyanidin dioxygenase, GeneName=LDOX	IPR044861_Isopenicillin N synthase-like, Fe(2+) 2OG dioxygenase domain; IPR026992_Non-haem dioxygenase N-terminal domain	ANS	0	0.98	45.46	7.49667	0	0	0	0	2.78	0.16	46.78	38.33	51.27	7.72	1.24	13.53
rnaSPAdes	1	Am_Rn_068830	1459	AEF14411.1_anthocyanidin synthase [Onobrychis viciifolia]	AT4G22880.2_leucoanthocyanidin dioxygenase, GeneName=LDOX	IPR044861_Isopenicillin N synthase-like, Fe(2+) 2OG dioxygenase domain; IPR026992_Non-haem dioxygenase N-terminal domain	ANS	0	0.83	39.3633	7.79667	0	0	0	0	2.49	0	32.32	36.86	48.91	7.8	1.12	14.47
Trinity	1	Am_Tr_104544	1459	AEF14411.1_anthocyanidin synthase [Onobrychis viciifolia]	AT4G22880.2_leucoanthocyanidin dioxygenase, GeneName=LDOX	IPR044861_Isopenicillin N synthase-like, Fe(2+) 2OG dioxygenase domain; IPR026992_Non-haem dioxygenase N-terminal domain	ANS	0	0.636667	30.1833	5.93	0	0	0	0	1.91	0	25.47	27.96	37.12	5.98	0.85	10.96

## Sheet: Table S9
Supplementary Table 9. Number and expression values of phenylpropanoid-related unigenes selected by TPM filtering (TPM ≥ 10).
Flatform	Unigene number	Unigene ID	Unigene length	Annotation description			Gene name	Average TPM				Roots			Leaves			Flowers			Stems
				NR blast	Araport11	InterPro		Roots	Leaves	Flowers	Stems	R1	R2	R3	L1	L2	L3	F1	F2	F3	S1	S2	S3
Iso-seq	6	Am_HQ_15428	2930	AID51445.1_phenylalanine ammonia-lyase 2 [Astragalus membranaceus]	AT2G37040.1_PHE ammonia lyase 1, GeneName=PAL1	IPR008948_L-Aspartase-like; IPR005922_Phenylalanine ammonia-lyase; IPR001106_Aromatic amino acid lyase	PAL	11.7833	18.2467	10.7267	24.11	16.77	16.39	2.19	31.95	18.98	3.81	13.97	15.3	2.91	40.33	29.28	2.72
		Am_HQ_23823	2675	QDG03197.1_phenylalanine ammonia-lyase [Glycyrrhiza uralensis]	AT3G53260.1_phenylalanine ammonia-lyase 2, GeneName=PAL2	IPR008948_L-Aspartase-like; IPR001106_Aromatic amino acid lyase; IPR005922_Phenylalanine ammonia-lyase	PAL	19.8567	29.9567	102.197	59.7267	10.45	28.75	20.37	29.51	34.01	26.35	83.21	95.1	128.28	60.69	75.95	42.54
		Am_HQ_24424	2667	ATY39966.1_Phenylalanine ammonia lyase 1 [Astragalus membranaceus]	AT2G37040.1_PHE ammonia lyase 1, GeneName=PAL1	IPR001106_Aromatic amino acid lyase; IPR005922_Phenylalanine ammonia-lyase; IPR008948_L-Aspartase-like	PAL	336.82	159.613	191.427	155.383	538.14	274.18	198.14	163.92	149.86	165.06	107.26	204.06	262.96	161	185.1	120.05
		Am_HQ_28347	2567	ATY39968.1_Phenylalanine ammonia lyase 3 [Astragalus membranaceus]	AT2G37040.1_PHE ammonia lyase 1, GeneName=PAL1	IPR005922_Phenylalanine ammonia-lyase; IPR001106_Aromatic amino acid lyase; IPR008948_L-Aspartase-like	PAL	32.7167	67.28	33.9833	78.7933	37.62	33.93	26.6	35.4	97.06	69.38	16.35	36.06	49.54	57.47	116.55	62.36
		Am_HQ_29880	2499	AID51445.1_phenylalanine ammonia-lyase 2 [Astragalus membranaceus]	AT2G37040.1_PHE ammonia lyase 1, GeneName=PAL1	IPR001106_Aromatic amino acid lyase; IPR008948_L-Aspartase-like; IPR005922_Phenylalanine ammonia-lyase	PAL	50.0467	113.613	81.7367	137.967	22.99	66.74	60.41	46.33	119.96	174.55	36.96	77.85	130.4	86.08	151.44	176.38
		Am_HQ_34937	2367	AID51446.1_phenylalanine ammonia-lyase 3 [Astragalus membranaceus]	AT2G37040.1_PHE ammonia lyase 1, GeneName=PAL1	IPR001106_Aromatic amino acid lyase; IPR008948_L-Aspartase-like; IPR005922_Phenylalanine ammonia-lyase	PAL	16.96	17.6767	24.5533	21.9667	4.6	38.08	8.2	2.69	20.1	30.24	7.53	18.21	47.92	12.33	20.28	33.29
rnaSPAdes	7	Am_Rn_024501	3082	AID51445.1_phenylalanine ammonia-lyase 2 [Astragalus membranaceus]	AT2G37040.1_PHE ammonia lyase 1, GeneName=PAL1	IPR008948_L-Aspartase-like; IPR005922_Phenylalanine ammonia-lyase; IPR001106_Aromatic amino acid lyase	PAL	48.2867	108.657	66.39	137.487	39.51	59.93	45.42	65.84	119.32	140.81	36	68.5	94.67	114.79	165.01	132.66
		Am_Rn_024732	3069	AID51446.1_phenylalanine ammonia-lyase 3 [Astragalus membranaceus]	AT2G37040.1_PHE ammonia lyase 1, GeneName=PAL1	IPR001106_Aromatic amino acid lyase; IPR008948_L-Aspartase-like; IPR005922_Phenylalanine ammonia-lyase	PAL	20.96	22.8267	26	29.3933	10.09	45.93	6.86	6.92	29.76	31.8	14.34	21.78	41.88	27.45	27.79	32.94
		Am_Rn_028045	2887	ATY39966.1_Phenylalanine ammonia lyase 1 [Astragalus membranaceus]	AT2G37040.1_PHE ammonia lyase 1, GeneName=PAL1	IPR001106_Aromatic amino acid lyase; IPR005922_Phenylalanine ammonia-lyase; IPR008948_L-Aspartase-like	PAL	308.083	165.77	176.093	158.873	502.88	255.18	166.19	172.09	152.79	172.43	81.11	197.81	249.36	161.37	193.76	121.49
		Am_Rn_029986	2788	QDG03197.1_phenylalanine ammonia-lyase [Glycyrrhiza uralensis]	AT3G53260.1_phenylalanine ammonia-lyase 2, GeneName=PAL2	IPR008948_L-Aspartase-like; IPR001106_Aromatic amino acid lyase; IPR005922_Phenylalanine ammonia-lyase	PAL	18.8033	32.54	97.6867	64.69	10.31	28.1	18	32.38	36.45	28.79	68.44	97.18	127.44	64.63	84.06	45.38
		Am_Rn_047201	2097	XP_004493977.1_phenylalanine ammonia-lyase 1 [Cicer arietinum]	AT2G37040.1_PHE ammonia lyase 1, GeneName=PAL1	IPR001106_Aromatic amino acid lyase; IPR008948_L-Aspartase-like; IPR005922_Phenylalanine ammonia-lyase	PAL	7.29	18.2933	8.61	21.2233	7.81	7.23	6.83	9.12	25.13	20.63	3.79	9.23	12.81	17.3	29.08	17.29
		Am_Rn_073673	1340	ATY39968.1_Phenylalanine ammonia lyase 3 [Astragalus membranaceus]	AT2G37040.1_PHE ammonia lyase 1, GeneName=PAL1	IPR008948_L-Aspartase-like; IPR001106_Aromatic amino acid lyase; IPR005922_Phenylalanine ammonia-lyase	PAL	30.1267	79.1	37.2467	88.85	33.33	35.91	21.14	36.64	110.95	89.71	8.85	39.01	63.88	50.18	132.72	83.65
		Am_Rn_074293	1326	ATY39967.1_Phenylalanine ammonia lyase 2 [Astragalus membranaceus]	AT2G37040.1_PHE ammonia lyase 1, GeneName=PAL1	IPR001106_Aromatic amino acid lyase; IPR008948_L-Aspartase-like; IPR005922_Phenylalanine ammonia-lyase	PAL	24.1633	79.5133	45.3633	82.6333	12.93	39.89	19.67	50.99	82.48	105.07	9.88	55.8	70.41	44.29	91.31	112.3
Trinity	8	Am_Tr_117304	2000	ATY39966.1_Phenylalanine ammonia lyase 1 [Astragalus membranaceus]	AT2G37040.1_PHE ammonia lyase 1, GeneName=PAL1	IPR008948_L-Aspartase-like; IPR005922_Phenylalanine ammonia-lyase; IPR001106_Aromatic amino acid lyase	PAL	224.23	108.267	105.24	93.3833	362.98	193.32	116.39	110.71	100.69	113.4	29.8	125.86	160.06	84.69	112.62	82.84
		Am_Tr_034988	1811	AID51445.1_phenylalanine ammonia-lyase 2 [Astragalus membranaceus]	AT2G37040.1_PHE ammonia lyase 1, GeneName=PAL1	IPR005922_Phenylalanine ammonia-lyase; IPR001106_Aromatic amino acid lyase; IPR008948_L-Aspartase-like	PAL	70.3367	123.467	83.17	155.433	48	100.72	62.29	70.96	131.88	167.56	49.95	80.49	119.07	135	176.76	154.54
		Am_Tr_054226	1231	ATY39968.1_Phenylalanine ammonia lyase 3 [Astragalus membranaceus]	AT2G37040.1_PHE ammonia lyase 1, GeneName=PAL1	IPR005922_Phenylalanine ammonia-lyase; IPR001106_Aromatic amino acid lyase; IPR008948_L-Aspartase-like	PAL	48.0833	88.2233	50.9567	98.46	44.63	64.23	35.39	46.91	119.24	98.52	22.9	51.19	78.78	77.63	130.04	87.71
		Am_Tr_034983	1087	ATY39967.1_Phenylalanine ammonia lyase 2 [Astragalus membranaceus]	AT2G37040.1_PHE ammonia lyase 1, GeneName=PAL1	IPR001106_Aromatic amino acid lyase; IPR008948_L-Aspartase-like	PAL	37.7267	83.5433	46.5167	97.0833	28.68	56.46	28.04	52.21	95.8	102.62	16.01	57.05	66.49	72.18	118.76	100.31
		Am_Tr_034987	1041	ATY39966.1_Phenylalanine ammonia lyase 1 [Astragalus membranaceus]	AT3G53260.1_phenylalanine ammonia-lyase 2, GeneName=PAL2	IPR001106_Aromatic amino acid lyase; IPR008948_L-Aspartase-like	PAL	404.983	180.047	210.08	191.653	643.71	315.3	255.94	187.33	161.77	191.04	149.02	213.57	267.65	220.51	228.06	126.39
		Am_Tr_117308	984	ATY39968.1_Phenylalanine ammonia lyase 3 [Astragalus membranaceus]	AT2G37040.1_PHE ammonia lyase 1, GeneName=PAL1	IPR008948_L-Aspartase-like; IPR001106_Aromatic amino acid lyase	PAL	19.3633	37.0933	18.69	44.8167	20.39	24.04	13.66	19.92	48.78	42.58	6.04	19.54	30.49	27.61	62.07	44.77
		Am_Tr_034984	956	ATY39967.1_Phenylalanine ammonia lyase 2 [Astragalus membranaceus]	AT2G37040.1_PHE ammonia lyase 1, GeneName=PAL1	IPR001106_Aromatic amino acid lyase; IPR008948_L-Aspartase-like	PAL	27.3033	63.2767	35.09	67.96	19.95	37.98	23.98	37.45	68.96	83.42	7.94	37.51	59.82	37.33	79.7	86.85
		Am_Tr_096852	478	ATY39968.1_Phenylalanine ammonia lyase 3 [Astragalus membranaceus]	AT2G37040.1_PHE ammonia lyase 1, GeneName=PAL1	.	PAL	22.2667	39.5533	17.5367	50.7633	28.08	18.94	19.78	19.74	55.36	43.56	12.17	19.82	20.62	42.86	78.92	30.51
Iso-seq	4	Am_HQ_49575	2030	AID51447.1_cinnamate 4-hydroxylase 2 [Astragalus membranaceus]	AT2G30490.1_cinnamate-4-hydroxylase, GeneName=C4H	IPR036396_Cytochrome P450 superfamily; IPR001128_Cytochrome P450; IPR002401_Cytochrome P450, E-class, group I	C4H	253.367	34.9033	57.6333	148.053	218.91	388.92	152.27	18.57	46.29	39.85	43.02	50.18	79.7	135.84	159.17	149.15
		Am_HQ_54640	1924	AEH68208.1_cinnamate 4-hydroxylase [Astragalus mongholicus]	AT2G30490.1_cinnamate-4-hydroxylase, GeneName=C4H	IPR001128_Cytochrome P450; IPR036396_Cytochrome P450 superfamily; IPR002401_Cytochrome P450, E-class, group I	C4H	6.41667	8.01667	11.1967	4.48333	18.19	1.06	0	21.85	1.67	0.53	30.99	1.49	1.11	10.53	2.2	0.72
		Am_HQ_56959	1855	AEH68208.1_cinnamate 4-hydroxylase [Astragalus mongholicus]	AT2G30490.1_cinnamate-4-hydroxylase, GeneName=C4H	IPR001128_Cytochrome P450; IPR036396_Cytochrome P450 superfamily; IPR002401_Cytochrome P450, E-class, group I	C4H	32.24	54.2467	77.5933	26.11	27.64	41.82	27.26	32.21	64.78	65.75	33.23	93.13	106.42	19.32	22.37	36.64
		Am_HQ_59770	1795	TKY50816.1_trans-cinnamate 4-monooxygenase [Spatholobus suberectus]	AT2G30490.1_cinnamate-4-hydroxylase, GeneName=C4H	IPR002401_Cytochrome P450, E-class, group I; IPR001128_Cytochrome P450; IPR036396_Cytochrome P450 superfamily	C4H	689.267	0.553333	7.17667	8.92333	526.75	857.3	683.75	0.46	0.45	0.75	6.64	6.45	8.44	8.25	4.7	13.82
rnaSPAdes	4	Am_Rn_030019	2786	AID51447.1_cinnamate 4-hydroxylase 2 [Astragalus membranaceus]	AT2G30490.1_cinnamate-4-hydroxylase, GeneName=C4H	IPR036396_Cytochrome P450 superfamily; IPR001128_Cytochrome P450; IPR002401_Cytochrome P450, E-class, group I	C4H	175.163	27.3733	38.73	113.73	152.85	276.8	95.84	14.26	36.61	31.25	24.14	36.36	55.69	102.3	126.25	112.64
		Am_Rn_048175	2064	AEH68208.1_cinnamate 4-hydroxylase [Astragalus mongholicus]	AT2G30490.1_cinnamate-4-hydroxylase, GeneName=C4H	IPR001128_Cytochrome P450; IPR036396_Cytochrome P450 superfamily; IPR002401_Cytochrome P450, E-class, group I	C4H	37.04	65.3233	81.33	32.2467	46.7	38.95	25.47	55.76	68.87	71.34	50.98	92.26	100.75	30.2	27.25	39.29
		Am_Rn_052812	1916	TKY50816.1_trans-cinnamate 4-monooxygenase [Spatholobus suberectus]	AT2G30490.1_cinnamate-4-hydroxylase, GeneName=C4H	IPR036396_Cytochrome P450 superfamily; IPR001128_Cytochrome P450; IPR002401_Cytochrome P450, E-class, group I	C4H	16.36	0	0.103333	0.51	23.69	12.44	12.95	0	0	0	0	0.31	0	0	0.42	1.11
		Am_Rn_055170	1841	XP_027366179.1_cytochrome P450 CYP73A100-like [Abrus precatorius]	AT2G30490.1_cinnamate-4-hydroxylase, GeneName=C4H	IPR002401_Cytochrome P450, E-class, group I; IPR001128_Cytochrome P450; IPR036396_Cytochrome P450 superfamily	C4H	633.963	0.403333	6.54333	9.35	500.12	814.8	586.97	0.52	0.28	0.41	5.4	6.25	7.98	9.07	4.45	14.53
Trinity	5	Am_Tr_059711	2741	AID51447.1_cinnamate 4-hydroxylase 2 [Astragalus membranaceus]	AT2G30490.1_cinnamate-4-hydroxylase, GeneName=C4H	IPR036396_Cytochrome P450 superfamily; IPR001128_Cytochrome P450; IPR002401_Cytochrome P450, E-class, group I	C4H	151.967	20.5633	28.4333	83.37	130.8	240.97	84.13	11.13	26.96	23.6	18.64	26.45	40.21	71.28	93.44	85.39
		Am_Tr_059709	2462	XP_031385586.1_trans-cinnamate 4-monooxygenase isoform X2 [Punica granatum]	AT2G30490.1_cinnamate-4-hydroxylase, GeneName=C4H	IPR001128_Cytochrome P450; IPR036396_Cytochrome P450 superfamily; IPR002401_Cytochrome P450, E-class, group I	C4H	12.13	1.18667	2.56667	5.80667	8.3	16.51	11.58	0	1.98	1.58	1.62	2.25	3.83	11.23	4.2	1.99
		Am_Tr_003806	2020	AEH68208.1_cinnamate 4-hydroxylase [Astragalus mongholicus]	AT2G30490.1_cinnamate-4-hydroxylase, GeneName=C4H	IPR001128_Cytochrome P450; IPR036396_Cytochrome P450 superfamily; IPR002401_Cytochrome P450, E-class, group I	C4H	32.09	49.8	62.2567	24.0433	39.03	35.21	22.03	43.56	51.51	54.33	40.05	69.89	76.83	23.52	19.81	28.8
		Am_Tr_174436	1942	XP_027934411.1_cytochrome P450 CYP73A100-like [Vigna unguiculata] QCE08638.1 trans-cinnamate 4-monooxygenase [Vigna unguiculata]	AT2G30490.1_cinnamate-4-hydroxylase, GeneName=C4H	IPR036396_Cytochrome P450 superfamily; IPR001128_Cytochrome P450; IPR002401_Cytochrome P450, E-class, group I	C4H	20.3267	0	0.106667	0.45	30.49	13.43	17.06	0	0	0	0	0.32	0	0	0.29	1.06
		Am_Tr_174435	1827	TKY50816.1_trans-cinnamate 4-monooxygenase [Spatholobus suberectus]	AT2G30490.1_cinnamate-4-hydroxylase, GeneName=C4H	IPR002401_Cytochrome P450, E-class, group I; IPR001128_Cytochrome P450; IPR036396_Cytochrome P450 superfamily	C4H	598.81	0.49	5.37333	7.22667	447.88	768.86	579.69	0.4	0.39	0.68	4.52	4.93	6.67	7.02	3.83	10.83
Iso-seq	16	Am_HQ_13075	2974	QDG03189.1_4-coumarate:CoA ligase [Glycyrrhiza uralensis]	AT3G21240.1_4-coumarate:CoA ligase 2, GeneName=4CL2	IPR025110_AMP-binding enzyme, C-terminal domain; IPR000873_AMP-dependent synthetase/ligase	4CL	12.8633	11.4467	16.6667	38.5567	5.28	24.39	8.92	5.06	15.84	13.44	18.33	14.13	17.54	32.14	47.04	36.49
		Am_HQ_33841	2401	ATY39971.1_4-coumaroyl:CoA-ligase [Astragalus membranaceus]	AT1G20510.3_OPC-8:0 CoA ligase1, GeneName=OPCL1	IPR000873_AMP-dependent synthetase/ligase	4CL	15.26	31.0767	11.93	29.7433	2.82	5.35	37.61	42.98	1.02	49.23	5.99	0.65	29.15	36.07	0.56	52.6
		Am_HQ_41737	2201	PNX95884.1_4-coumarate CoA ligase, partial [Trifolium pratense]	AT1G51680.2_4-coumarate:CoA ligase 1, GeneName=4CL1	IPR000873_AMP-dependent synthetase/ligase	4CL	19.7767	8.34	12.1333	25.0867	11.16	33.55	14.62	6.07	10.33	8.62	5.55	12.91	17.94	13.81	35.15	26.3
		Am_HQ_42278	2180	XP_004511423.1_4-coumarate--CoA ligase 2 [Cicer arietinum]	AT1G65060.1_4-coumarate:CoA ligase 3, GeneName=4CL3	IPR000873_AMP-dependent synthetase/ligase; IPR025110_AMP-binding enzyme, C-terminal domain	4CL	86.9067	71.64	52.35	49.55	49.12	167.23	44.37	46.05	85.59	83.28	32.44	52.26	72.35	36.15	55.14	57.36
		Am_HQ_44885	2124	XP_004512448.1_4-coumarate--CoA ligase-like 6 isoform X1 [Cicer arietinum]	AT4G19010.1_AMP-dependent synthetase and ligase family protein	IPR000873_AMP-dependent synthetase/ligase; IPR025110_AMP-binding enzyme, C-terminal domain	4CL	1.39	4.87667	7.04	10.2267	0.44	2.77	0.96	3.67	5.87	5.09	5.8	7.18	8.14	9.78	9	11.9
		Am_HQ_45655	2113	QDG03189.1_4-coumarate:CoA ligase [Glycyrrhiza uralensis]	AT3G21240.1_4-coumarate:CoA ligase 2, GeneName=4CL2	IPR025110_AMP-binding enzyme, C-terminal domain; IPR000873_AMP-dependent synthetase/ligase	4CL	111.453	26.59	50.7967	99.16	89.96	159.73	84.67	18.73	33.4	27.64	25.47	59	67.92	61.06	147.18	89.24
		Am_HQ_46786	2088	QDG03189.1_4-coumarate:CoA ligase [Glycyrrhiza uralensis]	AT3G21240.1_4-coumarate:CoA ligase 2, GeneName=4CL2	IPR025110_AMP-binding enzyme, C-terminal domain; IPR000873_AMP-dependent synthetase/ligase	4CL	9.57	3.35333	24.82	13.1033	6.32	14.92	7.47	2.49	3.99	3.58	20.97	26.63	26.86	8.87	19.95	10.49
		Am_HQ_46881	2076	ATY39971.1_4-coumaroyl:CoA-ligase [Astragalus membranaceus]	AT1G20510.1_OPC-8:0 CoA ligase1, GeneName=OPCL1	IPR025110_AMP-binding enzyme, C-terminal domain; IPR000873_AMP-dependent synthetase/ligase	4CL	51.88	79.4667	35.78	95.07	7.43	94.95	53.26	80.66	87.09	70.65	28.35	39.87	39.12	105.96	99.45	79.8
		Am_HQ_47701	2068	XP_045803451.1_4-coumarate--CoA ligase-like 9 [Trifolium pratense]	AT5G63380.1_AMP-dependent synthetase and ligase family protein	IPR000873_AMP-dependent synthetase/ligase; IPR025110_AMP-binding enzyme, C-terminal domain	4CL	7.80667	11.8233	12.0267	14.2967	4.85	10.51	8.06	10.47	14.22	10.78	13.22	12.49	10.37	12.61	16.72	13.56
		Am_HQ_48882	2002	AID51448.1_4-coumaroyl:CoA-ligase [Astragalus membranaceus]	AT3G21240.1_4-coumarate:CoA ligase 2, GeneName=4CL2	IPR000873_AMP-dependent synthetase/ligase; IPR025110_AMP-binding enzyme, C-terminal domain	4CL	30.0833	2.28667	6.53	21.9067	43.6	28.86	17.79	2.13	2.47	2.26	7.17	5.58	6.84	23.86	26.69	15.17
		Am_HQ_54948	1919	TKY54583.1_4-coumarate--CoA ligase 1 [Spatholobus suberectus]	AT1G51680.1_4-coumarate:CoA ligase 1, GeneName=4CL1	IPR000873_AMP-dependent synthetase/ligase; IPR025110_AMP-binding enzyme, C-terminal domain	4CL	0.103333	1.42333	21.75	0.0833333	0	0	0.31	0.67	2.31	1.29	8.69	32.74	23.82	0.06	0.13	0.06
		Am_HQ_59428	1775	XP_004515681.1_4-coumarate--CoA ligase-like 9 [Cicer arietinum]	AT5G63380.1_AMP-dependent synthetase and ligase family protein	IPR025110_AMP-binding enzyme, C-terminal domain; IPR000873_AMP-dependent synthetase/ligase	4CL	0.05	33.0167	2.69	5.64333	0	0.15	0	30.72	34.59	33.74	1.75	2.6	3.72	6.02	4.37	6.54
		Am_HQ_19597	2830	PNX74615.1_4-coumarate-CoA ligase 10-like protein [Trifolium pratense]	AT3G48990.1_AMP-dependent synthetase and ligase family protein, GeneName=AAE3	IPR000873_AMP-dependent synthetase/ligase	4CL	4.74667	11.86	16.4267	1.73333	2.08	6.87	5.29	11.41	14.41	9.76	9.37	16	23.91	2.16	1.95	1.09
		Am_HQ_31440	2456	PNX74615.1_4-coumarate-CoA ligase 10-like protein [Trifolium pratense]	AT3G48990.1_AMP-dependent synthetase and ligase family protein, GeneName=AAE3	.	4CL	28.8833	100.933	79.7033	9.35333	20.04	42.47	24.14	92.85	110.9	99.05	48.98	93.93	96.2	10.84	10.23	6.99
		Am_HQ_43470	2078	PNX74615.1_4-coumarate-CoA ligase 10-like protein [Trifolium pratense]	AT3G48990.1_AMP-dependent synthetase and ligase family protein, GeneName=AAE3	.	4CL	15.7467	30.0967	25.8733	6.23	11.71	21.17	14.36	29.27	31.73	29.29	15.42	33.27	28.93	7.12	6.43	5.14
		Am_HQ_50709	1992	PNY17269.1_4-coumarate-CoA ligase 7-like protein [Trifolium pratense]	AT4G05160.1_AMP-dependent synthetase and ligase family protein	IPR025110_AMP-binding enzyme, C-terminal domain; IPR000873_AMP-dependent synthetase/ligase	4CL	14.65	79.98	51.9667	19.9633	6.93	24.18	12.84	79.13	51.64	109.17	35.09	50.76	70.05	23.93	13.11	22.85
rnaSPAdes	15	Am_Rn_002313	6485	PNY17269.1_4-coumarate-CoA ligase 7-like protein [Trifolium pratense]	AT4G05160.1_AMP-dependent synthetase and ligase family protein	IPR000873_AMP-dependent synthetase/ligase; IPR025110_AMP-binding enzyme, C-terminal domain	4CL	3.63	26.7367	15.61	6.06667	0.97	7.03	2.89	26.24	18.05	35.92	8.64	16.65	21.54	7.35	4.63	6.22
		Am_Rn_008298	4609	PNX74615.1_4-coumarate-CoA ligase 10-like protein [Trifolium pratense]	AT3G48990.1_AMP-dependent synthetase and ligase family protein, GeneName=AAE3	IPR000873_AMP-dependent synthetase/ligase	4CL	3.54333	8.31	10.58	1.09667	2.34	4.81	3.48	7.57	8.57	8.79	5.36	11.17	15.21	1.28	1.24	0.77
		Am_Rn_012986	3972	ATY39971.1_4-coumaroyl:CoA-ligase [Astragalus membranaceus]	AT1G20510.1_OPC-8:0 CoA ligase1, GeneName=OPCL1	IPR025110_AMP-binding enzyme, C-terminal domain; IPR000873_AMP-dependent synthetase/ligase	4CL	13.49	31.4167	13.4533	38.03	1.1	17.95	21.42	32.7	23.06	38.49	13.52	9.81	17.03	43.33	30.94	39.82
		Am_Rn_013340	3933	XP_004515681.1_4-coumarate--CoA ligase-like 9 [Cicer arietinum]	AT5G63380.1_AMP-dependent synthetase and ligase family protein	IPR025110_AMP-binding enzyme, C-terminal domain; IPR000873_AMP-dependent synthetase/ligase	4CL	0.856667	16.7733	1.74	3.25667	1.49	0.4	0.68	15.06	18.25	17.01	0.83	1.74	2.65	2.82	3.01	3.94
		Am_Rn_015230	3750	QDG03189.1_4-coumarate:CoA ligase [Glycyrrhiza uralensis]	AT3G21240.1_4-coumarate:CoA ligase 2, GeneName=4CL2	IPR025110_AMP-binding enzyme, C-terminal domain; IPR000873_AMP-dependent synthetase/ligase	4CL	69.3067	26.6733	44.71	102.853	53.34	105.2	49.38	16.85	31.41	31.76	30.25	48.88	55	74.22	141.23	93.11
		Am_Rn_027231	2932	AID51448.1_4-coumaroyl:CoA-ligase [Astragalus membranaceus]	AT3G21240.1_4-coumarate:CoA ligase 2, GeneName=4CL2	IPR000873_AMP-dependent synthetase/ligase; IPR025110_AMP-binding enzyme, C-terminal domain	4CL	12.7433	0.7	1.61333	9.30333	22.1	10.36	5.77	1.13	0.62	0.35	1.32	2.13	1.39	14.97	8.48	4.46
		Am_Rn_030362	2770	PNX74615.1_4-coumarate-CoA ligase 10-like protein [Trifolium pratense]	AT3G48990.1_AMP-dependent synthetase and ligase family protein, GeneName=AAE3	.	4CL	49.3367	117.637	102.513	14.04	26.5	73.82	47.69	111.04	131.99	109.88	40.05	126.58	140.91	15.5	15.18	11.44
		Am_Rn_033433	2627	AID51448.1_4-coumaroyl:CoA-ligase [Astragalus membranaceus]	AT3G21240.1_4-coumarate:CoA ligase 2, GeneName=4CL2	IPR000873_AMP-dependent synthetase/ligase; IPR025110_AMP-binding enzyme, C-terminal domain	4CL	9.96	1.34667	4.01667	10.38	9.57	12.95	7.36	0.72	1.54	1.78	4.59	2.64	4.82	6.82	15.4	8.92
		Am_Rn_036208	2508	TKY54583.1_4-coumarate--CoA ligase 1 [Spatholobus suberectus]	AT1G51680.1_4-coumarate:CoA ligase 1, GeneName=4CL1	IPR025110_AMP-binding enzyme, C-terminal domain; IPR000873_AMP-dependent synthetase/ligase	4CL	0.0366667	1.14	15.8433	0.0533333	0	0	0.11	0.58	2.03	0.81	5.48	23.37	18.68	0.05	0.11	0
		Am_Rn_037463	2455	XP_004511423.1_4-coumarate--CoA ligase 2 [Cicer arietinum]	AT1G65060.1_4-coumarate:CoA ligase 3, GeneName=4CL3	IPR000873_AMP-dependent synthetase/ligase; IPR025110_AMP-binding enzyme, C-terminal domain	4CL	75.9333	72.4933	46.59	49.2667	42.89	149.32	35.59	47.16	85.64	84.68	24.23	49.14	66.4	35.68	56.12	56
		Am_Rn_040862	2320	ATY39971.1_4-coumaroyl:CoA-ligase [Astragalus membranaceus]	AT1G20510.3_OPC-8:0 CoA ligase1, GeneName=OPCL1	IPR000873_AMP-dependent synthetase/ligase	4CL	33.1467	63.4067	20.9633	62.6033	6.52	51.34	41.58	76.75	46.78	66.69	2.96	20.71	39.22	65.5	47.69	74.62
		Am_Rn_042798	2250	XP_004512448.1_4-coumarate--CoA ligase-like 6 isoform X1 [Cicer arietinum]	AT4G19010.1_AMP-dependent synthetase and ligase family protein	IPR025110_AMP-binding enzyme, C-terminal domain; IPR000873_AMP-dependent synthetase/ligase	4CL	1.21667	5.12333	6.47667	10.9733	0.43	2.39	0.83	4.03	5.87	5.47	4.74	6.89	7.8	10.15	9.82	12.95
		Am_Rn_045123	2168	PNX95884.1_4-coumarate CoA ligase, partial [Trifolium pratense]	AT3G21240.2_4-coumarate:CoA ligase 2, GeneName=4CL2	IPR000873_AMP-dependent synthetase/ligase	4CL	21.93	9.64	14.3367	17.4567	13.65	39.63	12.51	6.72	16.61	5.59	0.57	17.95	24.49	0	30.38	21.99
		Am_Rn_058222	1750	XP_045803451.1_4-coumarate--CoA ligase-like 9 [Trifolium pratense]	AT5G63380.1_AMP-dependent synthetase and ligase family protein	IPR025110_AMP-binding enzyme, C-terminal domain; IPR000873_AMP-dependent synthetase/ligase	4CL	8.83667	17.84	16.37	19.93	5.62	12	8.89	17.08	21.09	15.35	11.47	20.96	16.68	16.81	22.45	20.53
		Am_Rn_109116	696	PNX77888.1_4-coumarate-CoA ligase 9-like protein, partial [Trifolium pratense]	AT5G63380.1_AMP-dependent synthetase and ligase family protein	IPR000873_AMP-dependent synthetase/ligase; IPR025110_AMP-binding enzyme, C-terminal domain	4CL	8.88	13.0867	15.5333	15.5767	3.77	12.83	10.04	12.4	14.08	12.78	20.93	14.52	11.15	15.8	17.33	13.6
Trinity	11	Am_Tr_015734	3941	PNY17269.1_4-coumarate-CoA ligase 7-like protein [Trifolium pratense]	AT4G05160.1_AMP-dependent synthetase and ligase family protein	IPR000873_AMP-dependent synthetase/ligase; IPR025110_AMP-binding enzyme, C-terminal domain	4CL	23.36	38.2933	26.5133	18.5567	9.71	29.6	30.77	28.37	33.62	52.89	15.38	28.36	35.8	17.41	18.35	19.91
		Am_Tr_041483	3800	QDG03189.1_4-coumarate:CoA ligase [Glycyrrhiza uralensis]	AT3G21240.1_4-coumarate:CoA ligase 2, GeneName=4CL2	IPR000873_AMP-dependent synthetase/ligase; IPR025110_AMP-binding enzyme, C-terminal domain	4CL	73.77	24.5267	42.4533	84.6033	53.65	114.56	53.1	15.75	30.77	27.06	24.29	47.88	55.19	56.18	118.09	79.54
		Am_Tr_071675	3273	ATY39971.1_4-coumaroyl:CoA-ligase [Astragalus membranaceus]	AT1G20510.3_OPC-8:0 CoA ligase1, GeneName=OPCL1	IPR000873_AMP-dependent synthetase/ligase	4CL	8.07667	11.7	5.21	16.51	0.6	15.65	7.98	11.75	11.89	11.46	6.13	3.94	5.56	20.64	14.4	14.49
		Am_Tr_018129	2928	PNX74615.1_4-coumarate-CoA ligase 10-like protein [Trifolium pratense]	AT3G48990.1_AMP-dependent synthetase and ligase family protein, GeneName=AAE3	IPR000873_AMP-dependent synthetase/ligase	4CL	11.76	0.78	0.813333	1.59667	9.13	11.14	15.01	1.24	0.49	0.61	0.53	0.89	1.02	4.34	0.37	0.08
		Am_Tr_160621	2641	AID51448.1_4-coumaroyl:CoA-ligase [Astragalus membranaceus]	AT3G21240.2_4-coumarate:CoA ligase 2, GeneName=4CL2	IPR000873_AMP-dependent synthetase/ligase	4CL	10.3833	0.833333	2.27333	8.07667	13.92	8.93	8.3	0.96	0.98	0.56	2.62	1.59	2.61	9.37	9.24	5.62
		Am_Tr_207368	2508	TKY54583.1_4-coumarate--CoA ligase 1 [Spatholobus suberectus]	AT1G51680.1_4-coumarate:CoA ligase 1, GeneName=4CL1	IPR025110_AMP-binding enzyme, C-terminal domain; IPR000873_AMP-dependent synthetase/ligase	4CL	0.03	0.876667	11.87	0.0433333	0	0	0.09	0.45	1.55	0.63	4.25	17.79	13.57	0.04	0.09	0
		Am_Tr_093803	2433	XP_004511423.1_4-coumarate--CoA ligase 2 [Cicer arietinum]	AT1G65060.1_4-coumarate:CoA ligase 3, GeneName=4CL3	IPR000873_AMP-dependent synthetase/ligase; IPR025110_AMP-binding enzyme, C-terminal domain	4CL	68.9067	56.4267	34.3533	37.7733	36.22	136.47	34.03	36.64	66.36	66.28	14.79	37.53	50.74	27.58	42.73	43.01
		Am_Tr_133602	2318	XP_004515681.1_4-coumarate--CoA ligase-like 9 [Cicer arietinum]	AT5G63380.1_AMP-dependent synthetase and ligase family protein	IPR025110_AMP-binding enzyme, C-terminal domain; IPR000873_AMP-dependent synthetase/ligase	4CL	0.03	24.8133	1.51667	3.87333	0	0.09	0	23.16	25.2	26.08	0.72	1.38	2.45	3.94	2.95	4.73
		Am_Tr_071674	2150	ATY39971.1_4-coumaroyl:CoA-ligase [Astragalus membranaceus]	AT1G20510.1_OPC-8:0 CoA ligase1, GeneName=OPCL1	IPR000873_AMP-dependent synthetase/ligase; IPR025110_AMP-binding enzyme, C-terminal domain	4CL	47.4067	79.2733	27.71	81.05	7.26	67.67	67.29	89.99	56.24	91.59	12.43	24.93	45.77	87.85	61.68	93.62
		Am_Tr_019735	2076	XP_045803451.1_4-coumarate--CoA ligase-like 9 [Trifolium pratense]	AT5G63380.1_AMP-dependent synthetase and ligase family protein	IPR000873_AMP-dependent synthetase/ligase	4CL	7.44	11.3067	11.12	12.75	3.85	9.85	8.62	10.56	12.13	11.23	10.38	13.35	9.63	11.17	13.57	13.51
		Am_Tr_041484	539	PNX54643.1_4-coumarate-CoA ligase 1-like protein [Trifolium pratense]	AT3G21240.1_4-coumarate:CoA ligase 2, GeneName=4CL2	.	4CL	16.9567	5.63667	18.6867	23.7767	11.25	27.99	11.63	3.46	6.98	6.47	18.47	19.15	18.44	13.95	35.69	21.69
Iso-seq	8	Am_HQ_62204	1748	XP_004493096.1_chalcone synthase [Cicer arietinum]	AT5G13930.1_Chalcone and stilbene synthase family protein, GeneName=TT4	IPR016039_Thiolase-like; IPR001099_Chalcone/stilbene synthase, N-terminal; IPR011141_Polyketide synthase, type III; IPR012328_Chalcone/stilbene synthase, C-terminal	CHS	0	121.383	212.983	7.53	0	0	0	116.1	142.08	105.97	203.47	199.67	235.81	13.76	2.53	6.3
		Am_HQ_72269	1522	XP_045830180.1_chalcone synthase 1B [Trifolium pratense]	AT5G13930.1_Chalcone and stilbene synthase family protein, GeneName=TT4	IPR016039_Thiolase-like; IPR001099_Chalcone/stilbene synthase, N-terminal; IPR011141_Polyketide synthase, type III; IPR012328_Chalcone/stilbene synthase, C-terminal	CHS	43.2467	64.4833	29.7333	16.2267	20.08	47.96	61.7	50.59	49.98	92.88	23.28	30.71	35.21	11.92	15.36	21.4
		Am_HQ_73797	1503	ADZ45299.1_chalcone synthase 1 [Astragalus membranaceus]	AT5G13930.1_Chalcone and stilbene synthase family protein, GeneName=TT4	IPR001099_Chalcone/stilbene synthase, N-terminal; IPR016039_Thiolase-like; IPR012328_Chalcone/stilbene synthase, C-terminal; IPR011141_Polyketide synthase, type III	CHS	443.283	57.3267	273.873	109.66	350.22	498.74	480.89	29.48	65.71	76.79	236.57	244.37	340.68	94.93	109.28	124.77
		Am_HQ_74424	1478	AFD36435.1_chalcone synthase 1 [Astragalus membranaceus]	AT5G13930.1_Chalcone and stilbene synthase family protein, GeneName=TT4	IPR001099_Chalcone/stilbene synthase, N-terminal; IPR016039_Thiolase-like; IPR011141_Polyketide synthase, type III; IPR012328_Chalcone/stilbene synthase, C-terminal	CHS	116.113	46.7767	46.26	51.52	91.3	161.89	95.15	37.8	35.09	67.44	39.95	32.91	65.92	52.9	35.74	65.92
		Am_HQ_74751	1454	QIM59642.1_chalcone synthase [Astragalus mongholicus]	AT5G13930.1_Chalcone and stilbene synthase family protein, GeneName=TT4	IPR016039_Thiolase-like; IPR011141_Polyketide synthase, type III; IPR001099_Chalcone/stilbene synthase, N-terminal; IPR012328_Chalcone/stilbene synthase, C-terminal	CHS	120.78	92.5333	157.637	58.01	127.26	154.01	81.07	56.87	87.45	133.28	110.94	146.23	215.74	47.88	54.97	71.18
		Am_HQ_76172	1458	ATY39972.1_Chalcone synthase [Astragalus membranaceus]	AT5G13930.1_Chalcone and stilbene synthase family protein, GeneName=TT4	IPR016039_Thiolase-like; IPR011141_Polyketide synthase, type III; IPR012328_Chalcone/stilbene synthase, C-terminal; IPR001099_Chalcone/stilbene synthase, N-terminal	CHS	638.613	219.247	280.193	128.653	730.07	684.46	501.31	231.47	139.93	286.34	184.96	289.55	366.07	110.55	157.72	117.69
		Am_HQ_76757	1409	ADZ45297.1_chalcone synthase 2 [Astragalus membranaceus]	AT5G13930.1_Chalcone and stilbene synthase family protein, GeneName=TT4	IPR001099_Chalcone/stilbene synthase, N-terminal; IPR016039_Thiolase-like; IPR011141_Polyketide synthase, type III; IPR012328_Chalcone/stilbene synthase, C-terminal	CHS	1380.71	18.5167	143.26	58.73	1402.15	1933.13	806.85	12.27	17.71	25.57	142.54	107.22	180.02	50.49	59.44	66.26
		Am_HQ_78631	1383	AID51449.1_chalcone synthase 2 [Astragalus membranaceus]	AT5G13930.1_Chalcone and stilbene synthase family protein, GeneName=TT4	IPR001099_Chalcone/stilbene synthase, N-terminal; IPR011141_Polyketide synthase, type III; IPR012328_Chalcone/stilbene synthase, C-terminal; IPR016039_Thiolase-like	CHS	207.07	2.35	1.77333	4.70333	400.23	160.9	60.08	4.35	2.46	0.24	3.42	1.03	0.87	10.05	2.09	1.97
rnaSPAdes	15	Am_Rn_019665	3392	ADZ45297.1_chalcone synthase 2 [Astragalus membranaceus]	AT5G13930.1_Chalcone and stilbene synthase family protein, GeneName=TT4	IPR001099_Chalcone/stilbene synthase, N-terminal; IPR016039_Thiolase-like; IPR012328_Chalcone/stilbene synthase, C-terminal	CHS	165.63	13.8333	36.1433	23.3267	170.45	227.98	98.46	11	15.09	15.41	35.57	35.35	37.51	26.29	24.28	19.41
		Am_Rn_053989	1877	ADZ45299.1_chalcone synthase 1 [Astragalus membranaceus]	AT5G13930.1_Chalcone and stilbene synthase family protein, GeneName=TT4	IPR016039_Thiolase-like; IPR001099_Chalcone/stilbene synthase, N-terminal; IPR012328_Chalcone/stilbene synthase, C-terminal; IPR011141_Polyketide synthase, type III	CHS	345.997	49.14	205.657	93.9267	289.15	402.53	346.31	26.16	55.12	66.14	155.64	194.01	267.32	80.26	93.49	108.03
		Am_Rn_054104	1874	XP_004493096.1_chalcone synthase [Cicer arietinum]	AT5G13930.1_Chalcone and stilbene synthase family protein, GeneName=TT4	IPR016039_Thiolase-like; IPR001099_Chalcone/stilbene synthase, N-terminal; IPR011141_Polyketide synthase, type III; IPR012328_Chalcone/stilbene synthase, C-terminal	CHS	0	128.343	197.083	7.88333	0	0	0	123.79	147.88	113.36	162.61	199.44	229.2	14.27	2.75	6.63
		Am_Rn_059338	1717	AFD36435.1_chalcone synthase 1 [Astragalus membranaceus]	AT5G13930.1_Chalcone and stilbene synthase family protein, GeneName=TT4	IPR001099_Chalcone/stilbene synthase, N-terminal; IPR016039_Thiolase-like; IPR011141_Polyketide synthase, type III; IPR012328_Chalcone/stilbene synthase, C-terminal	CHS	100.687	45.7467	39.4567	50.6033	84.45	142.48	75.13	37.88	32.54	66.82	29.46	30.73	58.18	50.54	35.89	65.38
		Am_Rn_067016	1505	AEF14414.1_chalcone synthase [Onobrychis viciifolia]	AT5G13930.1_Chalcone and stilbene synthase family protein, GeneName=TT4	IPR011141_Polyketide synthase, type III; IPR001099_Chalcone/stilbene synthase, N-terminal; IPR016039_Thiolase-like; IPR012328_Chalcone/stilbene synthase, C-terminal	CHS	41.7767	69.95	28.76	17.6133	20.38	48.12	56.83	56.37	53.05	100.43	19.76	31.07	35.45	12.5	16.86	23.48
		Am_Rn_083972	1108	AAZ73731.1_chalcone synthase, partial [Astragalus mongholicus] CAJ20138.1 chalcone synthase, partial [Astragalus mongholicus]	AT5G13930.1_Chalcone and stilbene synthase family protein, GeneName=TT4	IPR012328_Chalcone/stilbene synthase, C-terminal; IPR001099_Chalcone/stilbene synthase, N-terminal; IPR016039_Thiolase-like	CHS	552.73	0	30.1533	9.35667	599.41	782.64	276.14	0	0	0	26.3	16.27	47.89	1.61	10.4	16.06
		Am_Rn_084476	1098	ATY39972.1_Chalcone synthase [Astragalus membranaceus]	AT5G13930.1_Chalcone and stilbene synthase family protein, GeneName=TT4	IPR016039_Thiolase-like; IPR012328_Chalcone/stilbene synthase, C-terminal; IPR001099_Chalcone/stilbene synthase, N-terminal	CHS	570.4	220.803	266.037	134.197	688.64	605.96	416.6	232.57	141.31	288.53	174.16	279.61	344.34	113.12	173.39	116.08
		Am_Rn_089014	1010	ABL14037.1_chalcone synthase 3, partial [Astragalus mongholicus]	AT5G13930.1_Chalcone and stilbene synthase family protein, GeneName=TT4	IPR001099_Chalcone/stilbene synthase, N-terminal; IPR016039_Thiolase-like	CHS	10.33	0.223333	4.38667	0.44	18.16	7.84	4.99	0	0	0.67	0.63	3.86	8.67	1.05	0.27	0
		Am_Rn_091935	956	QIM59642.1_chalcone synthase [Astragalus mongholicus]	AT5G13930.1_Chalcone and stilbene synthase family protein, GeneName=TT4	IPR016039_Thiolase-like; IPR012328_Chalcone/stilbene synthase, C-terminal; IPR001099_Chalcone/stilbene synthase, N-terminal	CHS	107.297	85.7367	138.753	59.9667	125.55	133.91	62.43	48.77	82.96	125.48	106.79	132.14	177.33	52.94	57.61	69.35
		Am_Rn_092292	950	AID51449.1_chalcone synthase 2 [Astragalus membranaceus]	AT5G13930.1_Chalcone and stilbene synthase family protein, GeneName=TT4	IPR001099_Chalcone/stilbene synthase, N-terminal; IPR016039_Thiolase-like; IPR012328_Chalcone/stilbene synthase, C-terminal	CHS	178.87	1.9	1.37	4.70333	347.56	130.65	58.4	3.66	1.73	0.31	2.43	1.21	0.47	9.21	2.26	2.64
		Am_Rn_094293	914	ATY39972.1_Chalcone synthase [Astragalus membranaceus]	AT5G13930.1_Chalcone and stilbene synthase family protein, GeneName=TT4	IPR001099_Chalcone/stilbene synthase, N-terminal; IPR016039_Thiolase-like	CHS	419.703	176.863	179.777	97.4633	476.33	482.75	300.03	186.45	109.47	234.67	70.23	210.76	258.34	81.79	114.27	96.33
		Am_Rn_098524	844	AID51449.1_chalcone synthase 2 [Astragalus membranaceus]	AT5G13930.1_Chalcone and stilbene synthase family protein, GeneName=TT4	IPR016039_Thiolase-like; IPR001099_Chalcone/stilbene synthase, N-terminal	CHS	137.107	2.75667	3.81	4.96667	264.78	146.54	0	4.53	3.74	0	2.98	4.3	4.15	11.08	3.82	0
		Am_Rn_098643	842	AID51449.1_chalcone synthase 2 [Astragalus membranaceus]	AT5G13930.1_Chalcone and stilbene synthase family protein, GeneName=TT4	IPR001099_Chalcone/stilbene synthase, N-terminal; IPR016039_Thiolase-like	CHS	112.743	110.107	151.16	59.86	110.89	154.38	72.96	70.27	100.88	159.17	64.4	151.95	237.13	43.47	57.97	78.14
		Am_Rn_100350	816	QHX39740.1_chalcone synthase, partial [Cajanus cajan]	AT5G13930.1_Chalcone and stilbene synthase family protein, GeneName=TT4	IPR016039_Thiolase-like; IPR001099_Chalcone/stilbene synthase, N-terminal	CHS	82.8067	0.7	0.443333	1.84667	158.66	27.8	61.96	0.99	0	1.11	0.93	0	0.4	1.75	0	3.79
		Am_Rn_104546	756	ADZ45297.1_chalcone synthase 2 [Astragalus membranaceus]	AT5G13930.1_Chalcone and stilbene synthase family protein, GeneName=TT4	IPR001099_Chalcone/stilbene synthase, N-terminal; IPR016039_Thiolase-like	CHS	1197.74	18.07	120.183	59.3733	1205.69	1767.32	620.22	11.56	16.7	25.95	80.6	105.88	174.07	46.26	56.66	75.2
Trinity	19	Am_Tr_059637	1874	XP_004493096.1_chalcone synthase [Cicer arietinum]	AT5G13930.1_Chalcone and stilbene synthase family protein, GeneName=TT4	IPR016039_Thiolase-like; IPR001099_Chalcone/stilbene synthase, N-terminal; IPR011141_Polyketide synthase, type III; IPR012328_Chalcone/stilbene synthase, C-terminal	CHS	0	98.97	151.133	6.01	0	0	0	95.38	113.29	88.24	128.16	151.29	173.95	10.94	2.07	5.02
		Am_Tr_030719	1718	ATY39972.1_Chalcone synthase [Astragalus membranaceus]	AT5G13930.1_Chalcone and stilbene synthase family protein, GeneName=TT4	IPR001099_Chalcone/stilbene synthase, N-terminal; IPR016039_Thiolase-like; IPR011141_Polyketide synthase, type III; IPR012328_Chalcone/stilbene synthase, C-terminal	CHS	283.503	28.14	110.757	50.9067	252.33	357.22	240.96	10.92	33.65	39.85	72.68	104.18	155.41	43.02	49.51	60.19
		Am_Tr_030716	1693	ATY39972.1_Chalcone synthase [Astragalus membranaceus]	AT5G13930.1_Chalcone and stilbene synthase family protein, GeneName=TT4	IPR016039_Thiolase-like; IPR012328_Chalcone/stilbene synthase, C-terminal; IPR001099_Chalcone/stilbene synthase, N-terminal; IPR011141_Polyketide synthase, type III	CHS	552.72	89.1533	168.013	88.9033	553.52	677.54	427.1	77.24	70.63	119.59	131.76	153.31	218.97	78.37	90.7	97.64
		Am_Tr_030718	1669	QIM59642.1_chalcone synthase [Astragalus mongholicus]	AT5G13930.1_Chalcone and stilbene synthase family protein, GeneName=TT4	IPR012328_Chalcone/stilbene synthase, C-terminal; IPR016039_Thiolase-like; IPR001099_Chalcone/stilbene synthase, N-terminal; IPR011141_Polyketide synthase, type III	CHS	175.34	3.65667	13.98	7.97	206.05	240.19	79.78	3	3.76	4.21	10.48	11.14	20.32	7.7	6.34	9.87
		Am_Tr_034095	1632	XP_045830180.1_chalcone synthase 1B [Trifolium pratense]	AT5G13930.1_Chalcone and stilbene synthase family protein, GeneName=TT4	IPR016039_Thiolase-like; IPR001099_Chalcone/stilbene synthase, N-terminal; IPR011141_Polyketide synthase, type III; IPR012328_Chalcone/stilbene synthase, C-terminal	CHS	36.2333	53.85	21.51	13.1833	17.02	41.19	50.49	42.12	40.57	78.86	14.74	23.51	26.28	9.61	12.52	17.42
		Am_Tr_030717	1535	ATY39972.1_Chalcone synthase [Astragalus membranaceus]	AT5G13930.1_Chalcone and stilbene synthase family protein, GeneName=TT4	IPR016039_Thiolase-like; IPR011141_Polyketide synthase, type III; IPR012328_Chalcone/stilbene synthase, C-terminal; IPR001099_Chalcone/stilbene synthase, N-terminal	CHS	612.687	138.907	163.43	86.1967	689.87	763.83	384.36	132.38	95.21	189.13	87.05	178.35	224.89	74.66	95.6	88.33
		Am_Tr_074322	835	PNX75906.1_chalcone synthase, partial [Trifolium pratense]	AT5G13930.1_Chalcone and stilbene synthase family protein, GeneName=TT4	.	CHS	345.547	6.59667	40.9967	16.9333	372.09	472.32	192.23	6.01	4.98	8.8	47.75	28.07	47.17	14.16	19.03	17.61
		Am_Tr_128009	546	PNX75906.1_chalcone synthase, partial [Trifolium pratense]	AT5G13930.1_Chalcone and stilbene synthase family protein, GeneName=TT4	IPR016039_Thiolase-like; IPR012328_Chalcone/stilbene synthase, C-terminal	CHS	98.5433	23.8133	28.79	24.8067	146.96	92.83	55.84	17.02	20.46	33.96	24.83	29.62	31.92	33.45	19.07	21.9
		Am_Tr_034100	540	ADZ45297.1_chalcone synthase 2 [Astragalus membranaceus]	AT5G13930.1_Chalcone and stilbene synthase family protein, GeneName=TT4	IPR016039_Thiolase-like; IPR001099_Chalcone/stilbene synthase, N-terminal	CHS	285.277	48.4933	74.26	38.98	309.97	398.62	147.24	25.11	42.3	78.07	34.19	69.36	119.23	33.77	31.2	51.97
		Am_Tr_034102	514	ATI97626.1_CHS, partial [Lotus sessilifolius]	AT5G13930.1_Chalcone and stilbene synthase family protein, GeneName=TT4	.	CHS	16.7667	2.62667	13.03	3.75667	14.49	19.87	15.94	1.56	3.24	3.08	6.14	11.53	21.42	3.2	3.27	4.8
		Am_Tr_049514	510	AAZ32905.1_chalcone synthase, partial [Medicago sativa]	AT5G13930.1_Chalcone and stilbene synthase family protein, GeneName=TT4	IPR016039_Thiolase-like; IPR012328_Chalcone/stilbene synthase, C-terminal; IPR001099_Chalcone/stilbene synthase, N-terminal	CHS	350.843	123.073	141.107	69.1067	405.96	378.28	268.29	131.67	69.73	167.82	85.19	158.95	179.18	51.51	89.33	66.48
		Am_Tr_054114	490	P51079.1_RecName: Full=Chalcone synthase 6-4; AltName: Full=Naringenin-chalcone synthase 6-4 [Medicago sativa] AAB41558.1 chalcone synthase, partial [Medicago sativa]	AT5G13930.1_Chalcone and stilbene synthase family protein, GeneName=TT4	IPR016039_Thiolase-like; IPR001099_Chalcone/stilbene synthase, N-terminal; IPR012328_Chalcone/stilbene synthase, C-terminal	CHS	945.267	39.91	132.513	71.43	941.16	1299.12	595.52	29.16	33.57	57	116.08	111.55	169.91	70.73	62.95	80.61
		Am_Tr_054115	480	PNX59440.1_chalcone synthase, partial [Trifolium pratense]	AT5G13930.1_Chalcone and stilbene synthase family protein, GeneName=TT4	.	CHS	102.79	9.65	6.78667	9.82	197.82	73.3	37.25	9.81	7.28	11.86	8.25	3.57	8.54	10.81	8.15	10.5
		Am_Tr_074548	412	PNX69487.1_chalcone synthase [Trifolium pratense]	AT5G13930.1_Chalcone and stilbene synthase family protein, GeneName=TT4	.	CHS	61.8	10.6233	14.7633	13.1	77.82	74.57	33.01	9.98	6.62	15.27	24.73	5.07	14.49	17.88	7.43	13.99
		Am_Tr_034096	327	AAZ73731.1_chalcone synthase, partial [Astragalus mongholicus] CAJ20138.1 chalcone synthase, partial [Astragalus mongholicus]	AT5G13930.1_Chalcone and stilbene synthase family protein, GeneName=TT4	IPR001099_Chalcone/stilbene synthase, N-terminal; IPR016039_Thiolase-like	CHS	87.9367	78.1033	96.2933	39.1967	74.64	138.8	50.37	52.81	72.01	109.49	49.57	99.74	139.57	20.7	41.7	55.19
		Am_Tr_034099	325	PNX63947.1_chalcone synthase, partial [Trifolium pratense]	AT5G13930.1_Chalcone and stilbene synthase family protein, GeneName=TT4	.	CHS	135.093	14.57	23.6067	8.03	260.32	98.59	46.37	11.38	15.38	16.95	21.34	16.11	33.37	6.36	10.91	6.82
		Am_Tr_190871	285	ACO83024.1_chalcone synthase, partial [Trifolium subterraneum]	AT5G13930.1_Chalcone and stilbene synthase family protein, GeneName=TT4	.	CHS	10.03	2.44	1.58	2.09667	7.82	10.51	11.76	2.51	1.5	3.31	0	2.42	2.32	2.49	2.56	1.24
		Am_Tr_109385	232	ATI97626.1_CHS, partial [Lotus sessilifolius]	AT5G13930.1_Chalcone and stilbene synthase family protein, GeneName=TT4	.	CHS	15.62	0.98	2.43667	6.58333	46.86	0	0	2.94	0	0	7.31	0	0	19.75	0	0
		Am_Tr_129504	232	ATI97626.1_CHS, partial [Lotus sessilifolius]	AT5G13930.1_Chalcone and stilbene synthase family protein, GeneName=TT4	.	CHS	204.91	155.473	165.44	77.73	206.23	262.19	146.31	88.27	149.4	228.75	70.69	170.3	255.33	59.26	73.48	100.45
Iso-seq	7	Am_HQ_72927	1539	ATY39973.1_Chalcone reductase [Astragalus membranaceus]	AT1G59960.1_NAD(P)-linked oxidoreductase superfamily protein	IPR036812_NADP-dependent oxidoreductase domain superfamily; IPR020471_Aldo-keto reductase; IPR023210_NADP-dependent oxidoreductase domain	CHR	918.097	63.32	60.7733	111.9	1834.7	676.33	243.26	50.94	69.95	69.07	87.25	30.92	64.15	174.26	75.82	85.62
		Am_HQ_76090	1439	AFC01214.1_chalcone reductase 1 [Astragalus membranaceus]	AT1G59960.1_NAD(P)-linked oxidoreductase superfamily protein	IPR023210_NADP-dependent oxidoreductase domain; IPR036812_NADP-dependent oxidoreductase domain superfamily	CHR	11.5067	6.71	8.52333	4.99333	14.39	12.83	7.3	1.26	8.42	10.45	4.23	11.86	9.48	2	6.45	6.53
		Am_HQ_78778	1373	CAA11226.1_chalcone reductase [Sesbania rostrata]	AT1G59960.1_NAD(P)-linked oxidoreductase superfamily protein	IPR036812_NADP-dependent oxidoreductase domain superfamily; IPR020471_Aldo-keto reductase; IPR023210_NADP-dependent oxidoreductase domain	CHR	0.113333	207.133	69.88	187.023	0	0.34	0	219.84	175.04	226.52	70.13	66.55	72.96	192	152.08	216.99
		Am_HQ_79181	1345	CAA11226.1_chalcone reductase [Sesbania rostrata]	AT1G59960.1_NAD(P)-linked oxidoreductase superfamily protein	IPR020471_Aldo-keto reductase; IPR036812_NADP-dependent oxidoreductase domain superfamily; IPR023210_NADP-dependent oxidoreductase domain	CHR	0	129.263	27.73	119.587	0	0	0	148.62	125.22	113.95	23.98	25.52	33.69	113.68	94.62	150.46
		Am_HQ_80782	1320	AFC01214.1_chalcone reductase 1 [Astragalus membranaceus]	AT1G59960.1_NAD(P)-linked oxidoreductase superfamily protein	IPR036812_NADP-dependent oxidoreductase domain superfamily; IPR020471_Aldo-keto reductase; IPR023210_NADP-dependent oxidoreductase domain	CHR	148.403	194.567	228.957	40.1733	107.89	165.19	172.13	133.61	210.4	239.69	143.72	277.39	265.76	32.51	63.25	24.76
		Am_HQ_81285	1306	AFC01214.1_chalcone reductase 1 [Astragalus membranaceus]	AT1G59960.1_NAD(P)-linked oxidoreductase superfamily protein	IPR023210_NADP-dependent oxidoreductase domain; IPR020471_Aldo-keto reductase; IPR036812_NADP-dependent oxidoreductase domain superfamily	CHR	29.3567	26.9933	21.36	8.21	21.2	48.48	18.39	10.8	33.53	36.65	6.92	23.98	33.18	4.24	13.49	6.9
		Am_HQ_81515	1277	AFC01214.1_chalcone reductase 1 [Astragalus membranaceus]	AT1G59960.1_NAD(P)-linked oxidoreductase superfamily protein	IPR036812_NADP-dependent oxidoreductase domain superfamily; IPR020471_Aldo-keto reductase; IPR023210_NADP-dependent oxidoreductase domain	CHR	371.313	32.9867	28.6867	72.21	9.56	782.69	321.69	0.23	52.25	46.48	0.44	24.77	60.85	2.43	106.75	107.45
rnaSPAdes	6	Am_Rn_050064	2002	AFC01214.1_chalcone reductase 1 [Astragalus membranaceus]	AT1G59960.1_NAD(P)-linked oxidoreductase superfamily protein	IPR023210_NADP-dependent oxidoreductase domain; IPR036812_NADP-dependent oxidoreductase domain superfamily	CHR	15.0767	3	2.56	4.81667	8.98	26.64	9.61	0	3.55	5.45	0.66	2.73	4.29	1.76	6.71	5.98
		Am_Rn_051480	1957	AFC01214.1_chalcone reductase 1 [Astragalus membranaceus]	AT1G59960.1_NAD(P)-linked oxidoreductase superfamily protein	IPR023210_NADP-dependent oxidoreductase domain; IPR036812_NADP-dependent oxidoreductase domain superfamily	CHR	7.78	23.9967	24.59	3.15	9.05	7.08	7.21	11.87	28.93	31.19	12.17	34.01	27.59	2.45	5.62	1.38
		Am_Rn_055530	1830	ATY39973.1_Chalcone reductase [Astragalus membranaceus]	AT1G59960.1_NAD(P)-linked oxidoreductase superfamily protein	IPR020471_Aldo-keto reductase; IPR036812_NADP-dependent oxidoreductase domain superfamily; IPR023210_NADP-dependent oxidoreductase domain	CHR	48.0567	43.3133	39.9567	13.9767	69.19	40.38	34.6	33.91	47.14	48.89	25.87	44.4	49.6	14.41	19.06	8.46
		Am_Rn_059711	1706	ATY39973.1_Chalcone reductase [Astragalus membranaceus]	AT1G59960.1_NAD(P)-linked oxidoreductase superfamily protein	IPR036812_NADP-dependent oxidoreductase domain superfamily; IPR020471_Aldo-keto reductase; IPR023210_NADP-dependent oxidoreductase domain	CHR	948.877	55.8833	44.79	125.617	1650.63	912.27	283.73	35.72	68.31	63.62	48.88	26.57	58.92	149.14	108.02	119.69
		Am_Rn_061346	1661	AFC01214.1_chalcone reductase 1 [Astragalus membranaceus]	AT1G59960.1_NAD(P)-linked oxidoreductase superfamily protein	IPR020471_Aldo-keto reductase; IPR036812_NADP-dependent oxidoreductase domain superfamily; IPR023210_NADP-dependent oxidoreductase domain	CHR	162.503	117.26	116.093	45.1	47.72	286.65	153.14	67.5	132	152.28	54.52	142.28	151.48	17.83	70.59	46.88
		Am_Rn_063625	1597	CAA11226.1_chalcone reductase [Sesbania rostrata]	AT1G59960.1_NAD(P)-linked oxidoreductase superfamily protein	IPR020471_Aldo-keto reductase; IPR023210_NADP-dependent oxidoreductase domain; IPR036812_NADP-dependent oxidoreductase domain superfamily	CHR	0.0366667	263.273	51.5433	218.613	0	0.11	0	289.49	218.26	282.07	54.16	47.28	53.19	228.55	157.82	269.47
Trinity	4	Am_Tr_054893	1874	CAA11226.1_chalcone reductase [Sesbania rostrata]	AT1G59960.1_NAD(P)-linked oxidoreductase superfamily protein	IPR036812_NADP-dependent oxidoreductase domain superfamily; IPR020471_Aldo-keto reductase; IPR023210_NADP-dependent oxidoreductase domain	CHR	0	53.1933	9.09333	44.9	0	0	0	62.92	43.96	52.7	10.11	6.7	10.47	42.09	28.65	63.96
		Am_Tr_054883	1645	CAA11226.1_chalcone reductase [Sesbania rostrata]	AT1G59960.1_NAD(P)-linked oxidoreductase superfamily protein	IPR036812_NADP-dependent oxidoreductase domain superfamily; IPR023210_NADP-dependent oxidoreductase domain; IPR020471_Aldo-keto reductase	CHR	0	184.72	47.7933	162.62	0	0	0	196.73	161.1	196.33	40	49.12	54.26	165.49	136.71	185.66
		Am_Tr_000828	1547	ATY39973.1_Chalcone reductase [Astragalus membranaceus]	AT1G59960.1_NAD(P)-linked oxidoreductase superfamily protein	IPR036812_NADP-dependent oxidoreductase domain superfamily; IPR020471_Aldo-keto reductase; IPR023210_NADP-dependent oxidoreductase domain	CHR	616.397	38.16	35.6267	77.22	1148.4	516.54	184.25	25.79	43.41	45.28	50.45	17.72	38.71	114.7	57.33	59.63
		Am_Tr_000827	1346	ATY39973.1_Chalcone reductase [Astragalus membranaceus]	AT1G59960.1_NAD(P)-linked oxidoreductase superfamily protein	IPR036812_NADP-dependent oxidoreductase domain superfamily; IPR020471_Aldo-keto reductase; IPR023210_NADP-dependent oxidoreductase domain	CHR	634	229.17	217.35	110.147	616.15	868.3	417.55	143.95	252.97	290.59	108.29	264.12	279.64	63.75	148.73	117.96
Iso-seq	3	Am_HQ_83661	1223	ATY39974.1_Chalcone isomerase [Astragalus membranaceus]	AT3G55120.1_Chalcone-flavanone isomerase family protein, GeneName=TT5	IPR016087_Chalcone isomerase; IPR036298_Chalcone isomerase superfamily	CHI	270.287	127.317	216.67	518.767	175.03	474.48	161.35	63.9	196.97	121.08	195.74	178.09	276.18	421.68	308.26	826.36
		Am_HQ_84333	1128	Q8H0G1.1_RecName: Full=Chalcone--flavanone isomerase 2; Short=Chalcone isomerase 2 [Lotus japonicus] BAC53984.1 putative chalcone isomerase [Lotus japonicus]	AT3G55120.1_Chalcone-flavanone isomerase family protein, GeneName=TT5	IPR036298_Chalcone isomerase superfamily; IPR016087_Chalcone isomerase	CHI	14.47	59.3533	95.2667	87.5133	9.25	28.77	5.39	43.32	72.17	62.57	121.74	78.62	85.44	77.7	74	110.84
		Am_HQ_88756	885	XP_013461511.2_probable chalcone--flavonone isomerase 3 [Medicago truncatula] AFK36813.1 unknown [Medicago truncatula]	AT5G05270.1_Chalcone-flavanone isomerase family protein, GeneName=CHIL	IPR016087_Chalcone isomerase; IPR036298_Chalcone isomerase superfamily	CHI	1485.12	253.877	489.573	356.597	2348.51	979.56	1127.29	221.11	281.66	258.86	503.89	430.75	534.08	345.43	379.33	345.03
rnaSPAdes	4	Am_Rn_019487	3403	ATY39974.1_Chalcone isomerase [Astragalus membranaceus]	AT3G55120.1_Chalcone-flavanone isomerase family protein, GeneName=TT5	IPR036298_Chalcone isomerase superfamily; IPR016087_Chalcone isomerase	CHI	89.94	66.3367	95.5767	218.013	59.74	161.84	48.24	38.34	94.39	66.28	83.31	85.34	118.08	175.56	138.41	340.07
		Am_Rn_082064	1148	XP_013461511.2_probable chalcone--flavonone isomerase 3 [Medicago truncatula] AFK36813.1 unknown [Medicago truncatula]	AT5G05270.1_Chalcone-flavanone isomerase family protein, GeneName=CHIL	IPR016087_Chalcone isomerase; IPR036298_Chalcone isomerase superfamily	CHI	337.35	84.1667	126.167	106.61	543.4	251.72	216.93	75.54	89.03	87.93	100.38	124.67	153.45	90.37	132.27	97.19
		Am_Rn_085271	1082	XP_013461511.2_probable chalcone--flavonone isomerase 3 [Medicago truncatula] AFK36813.1 unknown [Medicago truncatula]	AT5G05270.1_Chalcone-flavanone isomerase family protein, GeneName=CHIL	IPR016087_Chalcone isomerase; IPR036298_Chalcone isomerase superfamily	CHI	790.04	136.393	233.22	198.42	1309.19	503.85	557.08	112.7	153.57	142.91	202.89	229.1	267.67	193.65	200.39	201.22
		Am_Rn_087296	1043	PNY14782.1_chalcone-flavonone isomerase 2-like protein [Trifolium pratense]	AT1G53520.1_Chalcone-flavanone isomerase family protein, GeneName=FAP3	IPR036298_Chalcone isomerase superfamily; IPR016087_Chalcone isomerase	CHI	0.0433333	10.15	4.31667	3.66667	0.13	0	0	24.21	4.32	1.92	9.58	1.31	2.06	10.32	0.16	0.52
Trinity	5	Am_Tr_098397	3858	ATY39974.1_Chalcone isomerase [Astragalus membranaceus]	AT3G55120.1_Chalcone-flavanone isomerase family protein, GeneName=TT5	IPR016087_Chalcone isomerase; IPR036298_Chalcone isomerase superfamily	CHI	70.4633	34.7667	50.05	131.937	47.45	124.15	39.79	17.93	52.25	34.12	41.01	43.89	65.25	106.52	79.83	209.46
		Am_Tr_066445	1870	XP_004498865.1_fatty-acid-binding protein 2 [Cicer arietinum]	AT2G26310.1_Chalcone-flavanone isomerase family protein, GeneName=FAP2	IPR016087_Chalcone isomerase; IPR036298_Chalcone isomerase superfamily	CHI	9.55	14.7333	10.1667	15.23	3.08	18.01	7.56	12.44	17.53	14.23	8.45	12.23	9.82	20.25	10.97	14.47
		Am_Tr_006024	1483	Q8H0G1.1_RecName: Full=Chalcone--flavanone isomerase 2; Short=Chalcone isomerase 2 [Lotus japonicus] BAC53984.1 putative chalcone isomerase [Lotus japonicus]	AT3G55120.1_Chalcone-flavanone isomerase family protein, GeneName=TT5	IPR036298_Chalcone isomerase superfamily; IPR016087_Chalcone isomerase	CHI	6.33333	32.9167	44.06	42.7333	2.72	13.83	2.45	24.61	38.6	35.54	50.68	40.46	41.04	36.6	37.85	53.75
		Am_Tr_041072	1226	XP_045801107.1_fatty-acid-binding protein 3, chloroplastic [Trifolium pratense]	AT1G53520.1_Chalcone-flavanone isomerase family protein, GeneName=FAP3	IPR036298_Chalcone isomerase superfamily; IPR016087_Chalcone isomerase	CHI	0	12.0267	18.5167	4.59333	0	0	0	6.26	14.32	15.5	20.5	17.2	17.85	2.65	2.52	8.61
		Am_Tr_061094	1211	XP_013461511.2_probable chalcone--flavonone isomerase 3 [Medicago truncatula] AFK36813.1 unknown [Medicago truncatula]	AT5G05270.1_Chalcone-flavanone isomerase family protein, GeneName=CHIL	IPR016087_Chalcone isomerase; IPR036298_Chalcone isomerase superfamily	CHI	936.317	158.1	259.983	215.32	1492.79	630.71	685.45	138.15	170.57	165.58	236.9	245.68	297.37	205.75	230.25	209.96
Iso-seq	3	Am_HQ_21462	2763	AEH68209.1_isoflavone synthase [Astragalus mongholicus] AEQ39024.1 isoflavone synthase [Astragalus membranaceus] AEV91333.1 isolfavone synthase 2 [Astragalus mongholicus]	AT5G06900.1_cytochrome P450, family 93, subfamily D, polypeptide 1, GeneName=CYP93D1	IPR002401_Cytochrome P450, E-class, group I; IPR001128_Cytochrome P450; IPR036396_Cytochrome P450 superfamily	IFS	101.747	90.1333	58.12	46.55	45.88	228.98	30.38	70	100.76	99.64	24.01	54.29	96.06	55.17	45.44	39.04
		Am_HQ_41791	2106	AEH68209.1_isoflavone synthase [Astragalus mongholicus] AEQ39024.1 isoflavone synthase [Astragalus membranaceus] AEV91333.1 isolfavone synthase 2 [Astragalus mongholicus]	AT2G45560.1_cytochrome P450, family 76, subfamily C, polypeptide 1, GeneName=CYP76C1	IPR036396_Cytochrome P450 superfamily; IPR001128_Cytochrome P450	IFS	637.51	578.843	412.147	336.973	381.13	1331.12	200.28	438.15	604.03	694.35	272.42	380.41	583.61	393.26	317.37	300.29
		Am_HQ_42345	2178	AFC88270.1_isoflavone synthase 1 [Astragalus membranaceus]	AT3G20960.1_cytochrome P450, family 705, subfamily A, polypeptide 33, GeneName=CYP705A33	IPR001128_Cytochrome P450; IPR036396_Cytochrome P450 superfamily	IFS	257.65	230.527	145.58	122.377	135.02	562.4	75.53	182.63	242.05	266.9	56.69	151.7	228.35	127.97	128.86	110.3
rnaSPAdes	4	Am_Rn_010690	4247	AEH68209.1_isoflavone synthase [Astragalus mongholicus] AEQ39024.1 isoflavone synthase [Astragalus membranaceus] AEV91333.1 isolfavone synthase 2 [Astragalus mongholicus]	AT2G45560.1_cytochrome P450, family 76, subfamily C, polypeptide 1, GeneName=CYP76C1	IPR036396_Cytochrome P450 superfamily; IPR001128_Cytochrome P450	IFS	103.857	111.697	54.4133	57.5133	82.31	199.72	29.54	65.27	129.53	140.29	33	57.69	72.55	65.9	53.05	53.59
		Am_Rn_012564	4020	AEH68209.1_isoflavone synthase [Astragalus mongholicus] AEQ39024.1 isoflavone synthase [Astragalus membranaceus] AEV91333.1 isolfavone synthase 2 [Astragalus mongholicus]	AT5G06900.1_cytochrome P450, family 93, subfamily D, polypeptide 1, GeneName=CYP93D1	IPR001128_Cytochrome P450; IPR036396_Cytochrome P450 superfamily; IPR002401_Cytochrome P450, E-class, group I	IFS	98.5067	82.2233	72.33	59.1167	46.47	222.7	26.35	78.29	62.14	106.24	68.82	53.01	95.16	88.76	51.46	37.13
		Am_Rn_019398	3410	AEH68209.1_isoflavone synthase [Astragalus mongholicus] AEQ39024.1 isoflavone synthase [Astragalus membranaceus] AEV91333.1 isolfavone synthase 2 [Astragalus mongholicus]	AT4G31480.1_Coatomer, beta subunit	IPR001128_Cytochrome P450; IPR002401_Cytochrome P450, E-class, group I; IPR036396_Cytochrome P450 superfamily	IFS	129.243	164.77	146.113	177.38	84.76	212.17	90.8	134.89	177.86	181.56	89.32	172.67	176.35	203.13	166.87	162.14
		Am_Rn_033321	2631	AEH68209.1_isoflavone synthase [Astragalus mongholicus] AEQ39024.1 isoflavone synthase [Astragalus membranaceus] AEV91333.1 isolfavone synthase 2 [Astragalus mongholicus]	AT2G42250.1_cytochrome P450, family 712, subfamily A, polypeptide 1, GeneName=CYP712A1	IPR036396_Cytochrome P450 superfamily; IPR001128_Cytochrome P450; IPR002401_Cytochrome P450, E-class, group I	IFS	348.303	345.573	152.723	86.4667	162.09	845.37	37.45	270.46	365.71	400.55	1.21	144.88	312.08	53.28	112.64	93.48
Trinity	3	Am_Tr_109934	2550	AEH68209.1_isoflavone synthase [Astragalus mongholicus] AEQ39024.1 isoflavone synthase [Astragalus membranaceus] AEV91333.1 isolfavone synthase 2 [Astragalus mongholicus]	AT5G06900.1_cytochrome P450, family 93, subfamily D, polypeptide 1, GeneName=CYP93D1	IPR002401_Cytochrome P450, E-class, group I; IPR001128_Cytochrome P450; IPR036396_Cytochrome P450 superfamily	IFS	755.867	644.02	394.603	200.717	410.33	1635.72	221.55	502.1	644.85	785.11	196.23	396.05	591.53	357.72	174.41	70.02
		Am_Tr_109939	2298	AFC88270.1_isoflavone synthase 1 [Astragalus membranaceus]	AT2G45560.1_cytochrome P450, family 76, subfamily C, polypeptide 1, GeneName=CYP76C1	IPR001128_Cytochrome P450; IPR002401_Cytochrome P450, E-class, group I; IPR036396_Cytochrome P450 superfamily	IFS	22.3433	3.09333	3.13333	237.5	15	43.67	8.36	0.09	2.81	6.38	2.52	4.73	2.15	161.78	249.24	301.48
		Am_Tr_109935	2284	AEH68209.1_isoflavone synthase [Astragalus mongholicus] AEQ39024.1 isoflavone synthase [Astragalus membranaceus] AEV91333.1 isolfavone synthase 2 [Astragalus mongholicus]	AT5G06900.1_cytochrome P450, family 93, subfamily D, polypeptide 1, GeneName=CYP93D1	IPR001128_Cytochrome P450; IPR036396_Cytochrome P450 superfamily; IPR002401_Cytochrome P450, E-class, group I	IFS	9.02333	36.97	12.04	115.57	6.9	18.84	1.33	23.93	58.28	28.7	0	9.84	26.28	2.96	135.65	208.1
Iso-seq	3	Am_HQ_79972	1344	Q5NUF4.1_RecName: Full=2-hydroxyisoflavanone dehydratase; AltName: Full=Carboxylesterase HIDM [Glycyrrhiza echinata] BAD80839.1 2-Hydroxyisoflavanone dehydratase [Glycyrrhiza echinata]	AT3G48690.1_alpha/beta-Hydrolases superfamily protein, GeneName=CXE12	IPR013094_Alpha/beta hydrolase fold-3; IPR029058_Alpha/Beta hydrolase fold	2HID	253.15	44.5667	149.153	67.6	249.88	172.08	337.49	28.24	45.85	59.61	103.48	157.99	185.99	70.56	54.04	78.2
		Am_HQ_82955	1232	XP_003610679.2_2-hydroxyisoflavanone dehydratase [Medicago truncatula]	AT1G47480.1_alpha/beta-Hydrolases superfamily protein	IPR013094_Alpha/beta hydrolase fold-3; IPR029058_Alpha/Beta hydrolase fold	2HID	33.09	46.06	23.31	21.98	26.98	42.81	29.48	24.77	51.65	61.76	18.23	23.3	28.4	16.3	22.58	27.06
		Am_HQ_84997	1167	XP_004516320.1_2-hydroxyisoflavanone dehydratase-like [Cicer arietinum]	AT1G19190.1_alpha/beta-Hydrolases superfamily protein	IPR013094_Alpha/beta hydrolase fold-3; IPR029058_Alpha/Beta hydrolase fold	2HID	0.716667	4.89667	18.4833	16.75	0.22	1.75	0.18	3.25	8.55	2.89	40.18	8.88	6.39	24.02	6.76	19.47
rnaSPAdes	3	Am_Rn_050193	1998	Q5NUF4.1_RecName: Full=2-hydroxyisoflavanone dehydratase; AltName: Full=Carboxylesterase HIDM [Glycyrrhiza echinata] BAD80839.1 2-Hydroxyisoflavanone dehydratase [Glycyrrhiza echinata]	AT3G48690.1_alpha/beta-Hydrolases superfamily protein, GeneName=CXE12	IPR013094_Alpha/beta hydrolase fold-3; IPR029058_Alpha/Beta hydrolase fold	2HID	158.27	32.87	97.25	49.4733	165.13	111.86	197.82	20.9	33.29	44.42	57.34	108.99	125.42	50.71	40.16	57.55
		Am_Rn_072537	1368	XP_004516320.1_2-hydroxyisoflavanone dehydratase-like [Cicer arietinum]	AT1G19190.1_alpha/beta-Hydrolases superfamily protein	IPR013094_Alpha/beta hydrolase fold-3; IPR029058_Alpha/Beta hydrolase fold	2HID	0.603333	4.75667	14.5567	16.1733	0.19	1.48	0.14	3.14	8.33	2.8	29.68	8.39	5.6	23.32	6.55	18.65
		Am_Rn_074473	1322	XP_003610679.2_2-hydroxyisoflavanone dehydratase [Medicago truncatula]	AT1G47480.1_alpha/beta-Hydrolases superfamily protein	IPR013094_Alpha/beta hydrolase fold-3; IPR029058_Alpha/Beta hydrolase fold	2HID	29.5533	48.0133	21.31	22.5633	25.02	39.13	24.51	26.07	52.06	65.91	13.85	22.97	27.11	16.94	22.94	27.81
Trinity	3	Am_Tr_080569	1434	Q5NUF4.1_RecName: Full=2-hydroxyisoflavanone dehydratase; AltName: Full=Carboxylesterase HIDM [Glycyrrhiza echinata] BAD80839.1 2-Hydroxyisoflavanone dehydratase [Glycyrrhiza echinata]	AT3G48690.1_alpha/beta-Hydrolases superfamily protein, GeneName=CXE12	IPR013094_Alpha/beta hydrolase fold-3; IPR029058_Alpha/Beta hydrolase fold	2HID	205.89	35.0233	100.073	52.4133	208	144.86	264.81	22.27	35.41	47.39	60.15	113.28	126.79	54.88	41.45	60.91
		Am_Tr_113029	1335	XP_004516320.1_2-hydroxyisoflavanone dehydratase-like [Cicer arietinum]	AT1G19190.1_alpha/beta-Hydrolases superfamily protein	IPR013094_Alpha/beta hydrolase fold-3; IPR029058_Alpha/Beta hydrolase fold	2HID	0.563333	3.53	11.57	12.0433	0.17	1.38	0.14	2.31	6.57	1.71	23.79	6.55	4.37	16.97	5.08	14.08
		Am_Tr_109045	1264	XP_003610679.2_2-hydroxyisoflavanone dehydratase [Medicago truncatula]	AT1G47480.1_alpha/beta-Hydrolases superfamily protein	IPR013094_Alpha/beta hydrolase fold-3; IPR029058_Alpha/Beta hydrolase fold	2HID	28.8333	40.0733	17.6767	18.4767	24.12	37.04	25.34	21.72	43.48	55.02	12.13	18.65	22.25	13.54	18.83	23.06
Iso-seq	5	Am_HQ_64799	1714	Q84KK6.1_RecName: Full=Isoflavone 4&apos;-O-methyltransferase; Short=GeHI4&apos;OMT; AltName: Full=2,7,4&apos;-trihydroxyisoflavanone 4&apos;-O-methyltransferase; AltName: Full=S-adenosyl-L-methionine:2,7,4&apos;-trihydroxyisoflavanone 4&apos;-O-methyltransferase [Glycyrrhiza echinata] BAC58011.1 S-adenosyl-L-methionine: 2,7,4&apos;-trihydroxyisoflavanone 4&apos;-O-methyltransferase [Glycyrrhiza …	AT4G35160.1_O-methyltransferase family protein	IPR001077_O-methyltransferase domain; IPR036390_Winged helix DNA-binding domain superfamily; IPR016461_O-methyltransferase COMT-type; IPR012967_Plant methyltransferase dimerisation; IPR029063_S-adenosyl-L-methionine-dependent methyltransferase	IOMT	195.437	104.01	85.4433	99.7433	193.47	302.93	89.91	60.54	125.74	125.75	39.27	86.08	130.98	98.61	95.81	104.81
		Am_HQ_69248	1538	ATY39976.1_Isoflavone O-methyltransferase [Astragalus membranaceus]	AT4G35160.1_O-methyltransferase family protein	IPR036390_Winged helix DNA-binding domain superfamily; IPR001077_O-methyltransferase domain; IPR016461_O-methyltransferase COMT-type; IPR029063_S-adenosyl-L-methionine-dependent methyltransferase; IPR012967_Plant methyltransferase dimerisation	IOMT	32.7	87.44	49.2933	17.4667	36.88	34.41	26.81	42.72	86.82	132.78	23.17	63.41	61.3	13.11	21.63	17.66
		Am_HQ_81055	1300	Q84KK6.1_RecName: Full=Isoflavone 4&apos;-O-methyltransferase; Short=GeHI4&apos;OMT; AltName: Full=2,7,4&apos;-trihydroxyisoflavanone 4&apos;-O-methyltransferase; AltName: Full=S-adenosyl-L-methionine:2,7,4&apos;-trihydroxyisoflavanone 4&apos;-O-methyltransferase [Glycyrrhiza echinata] BAC58011.1 S-adenosyl-L-methionine: 2,7,4&apos;-trihydroxyisoflavanone 4&apos;-O-methyltransferase [Glycyrrhiza …	AT4G35160.1_O-methyltransferase family protein	IPR036390_Winged helix DNA-binding domain superfamily; IPR016461_O-methyltransferase COMT-type; IPR029063_S-adenosyl-L-methionine-dependent methyltransferase; IPR001077_O-methyltransferase domain; IPR012967_Plant methyltransferase dimerisation	IOMT	16.13	7.64	16.3833	5.10667	5.93	37.7	4.76	6.66	8.82	7.44	17.95	5.06	26.14	6.11	1.12	8.09
		Am_HQ_81501	1225	ATY39976.1_Isoflavone O-methyltransferase [Astragalus membranaceus]	AT4G35160.1_O-methyltransferase family protein	IPR012967_Plant methyltransferase dimerisation; IPR016461_O-methyltransferase COMT-type; IPR036390_Winged helix DNA-binding domain superfamily; IPR001077_O-methyltransferase domain; IPR029063_S-adenosyl-L-methionine-dependent methyltransferase	IOMT	124.5	184.133	76.6233	94.7067	144.96	104.62	123.92	109.07	184.02	259.31	36.85	94.87	98.15	51.42	135.56	97.14
		Am_HQ_84308	1197	TKY50287.1_Isoflavone 7-O-methyltransferase [Spatholobus suberectus]	AT4G35160.1_O-methyltransferase family protein	IPR001077_O-methyltransferase domain; IPR029063_S-adenosyl-L-methionine-dependent methyltransferase; IPR036390_Winged helix DNA-binding domain superfamily; IPR016461_O-methyltransferase COMT-type; IPR012967_Plant methyltransferase dimerisation	IOMT	0.13	8.57	64.1467	0.563333	0	0.21	0.18	2.31	20.97	2.43	76	54.09	62.35	0.34	0.79	0.56
rnaSPAdes	6	Am_Rn_042799	2250	AID51450.1_isoflavone O-methyltransferase [Astragalus membranaceus]	AT4G35160.1_O-methyltransferase family protein	IPR029063_S-adenosyl-L-methionine-dependent methyltransferase; IPR001077_O-methyltransferase domain; IPR036390_Winged helix DNA-binding domain superfamily; IPR012967_Plant methyltransferase dimerisation	IOMT	10.6067	0.276667	0.136667	0.293333	20.2	3.69	7.93	0.51	0.24	0.08	0.05	0.12	0.24	0.56	0	0.32
		Am_Rn_047303	2093	Q84KK6.1_RecName: Full=Isoflavone 4&apos;-O-methyltransferase; Short=GeHI4&apos;OMT; AltName: Full=2,7,4&apos;-trihydroxyisoflavanone 4&apos;-O-methyltransferase; AltName: Full=S-adenosyl-L-methionine:2,7,4&apos;-trihydroxyisoflavanone 4&apos;-O-methyltransferase [Glycyrrhiza echinata] BAC58011.1 S-adenosyl-L-methionine: 2,7,4&apos;-trihydroxyisoflavanone 4&apos;-O-methyltransferase [Glycyrrhiza …	AT4G35160.1_O-methyltransferase family protein	IPR001077_O-methyltransferase domain; IPR036390_Winged helix DNA-binding domain superfamily; IPR016461_O-methyltransferase COMT-type; IPR012967_Plant methyltransferase dimerisation; IPR029063_S-adenosyl-L-methionine-dependent methyltransferase	IOMT	156.09	95.0167	69.8367	90.7767	155.36	246.93	65.98	55.64	112.81	116.6	26.7	73.53	109.28	88.2	88.59	95.54
		Am_Rn_049748	2013	Q84KK5.1_RecName: Full=Isoflavone 7-O-methyltransferase; AltName: Full=Daidzein 7-O-methyltransferase [Glycyrrhiza echinata] BAC58012.1 S-adenosyl-L-methionine: daidzein 7-0-methyltransferase [Glycyrrhiza echinata]	AT5G54160.1_O-methyltransferase 1, GeneName=OMT1	IPR029063_S-adenosyl-L-methionine-dependent methyltransferase; IPR036390_Winged helix DNA-binding domain superfamily; IPR001077_O-methyltransferase domain; IPR012967_Plant methyltransferase dimerisation	IOMT	19.45	63.21	32.2933	13.05	23.27	21.25	13.83	31.36	62.63	95.64	11.99	43.91	40.98	9.45	16.79	12.91
		Am_Rn_050644	1984	ATY39976.1_Isoflavone O-methyltransferase [Astragalus membranaceus]	AT4G35160.1_O-methyltransferase family protein	IPR012967_Plant methyltransferase dimerisation; IPR016461_O-methyltransferase COMT-type; IPR036390_Winged helix DNA-binding domain superfamily; IPR001077_O-methyltransferase domain; IPR029063_S-adenosyl-L-methionine-dependent methyltransferase	IOMT	73.3267	131.727	49.75	64.4933	88.06	64.14	67.78	77.66	127.71	189.81	19.94	64.31	65	34.2	93	66.28
		Am_Rn_064183	1582	Q84KK6.1_RecName: Full=Isoflavone 4&apos;-O-methyltransferase; Short=GeHI4&apos;OMT; AltName: Full=2,7,4&apos;-trihydroxyisoflavanone 4&apos;-O-methyltransferase; AltName: Full=S-adenosyl-L-methionine:2,7,4&apos;-trihydroxyisoflavanone 4&apos;-O-methyltransferase [Glycyrrhiza echinata] BAC58011.1 S-adenosyl-L-methionine: 2,7,4&apos;-trihydroxyisoflavanone 4&apos;-O-methyltransferase [Glycyrrhiza …	AT4G35160.1_O-methyltransferase family protein	IPR016461_O-methyltransferase COMT-type; IPR001077_O-methyltransferase domain; IPR036390_Winged helix DNA-binding domain superfamily; IPR012967_Plant methyltransferase dimerisation; IPR029063_S-adenosyl-L-methionine-dependent methyltransferase	IOMT	12.7333	6.8	12.5033	4.50333	4.91	30	3.29	5.79	7.77	6.84	12.07	4.19	21.25	5.15	1.05	7.31
		Am_Rn_070875	1409	TKY50287.1_Isoflavone 7-O-methyltransferase [Spatholobus suberectus]	AT4G35160.1_O-methyltransferase family protein	IPR001077_O-methyltransferase domain; IPR029063_S-adenosyl-L-methionine-dependent methyltransferase; IPR036390_Winged helix DNA-binding domain superfamily; IPR016461_O-methyltransferase COMT-type; IPR012967_Plant methyltransferase dimerisation	IOMT	0.0466667	8.51333	54.1933	0.533333	0	0	0.14	2.04	21.02	2.48	57.42	50.3	54.86	0.31	0.76	0.53
Trinity	7	Am_Tr_148597	2093	Q84KK6.1_RecName: Full=Isoflavone 4&apos;-O-methyltransferase; Short=GeHI4&apos;OMT; AltName: Full=2,7,4&apos;-trihydroxyisoflavanone 4&apos;-O-methyltransferase; AltName: Full=S-adenosyl-L-methionine:2,7,4&apos;-trihydroxyisoflavanone 4&apos;-O-methyltransferase [Glycyrrhiza echinata] BAC58011.1 S-adenosyl-L-methionine: 2,7,4&apos;-trihydroxyisoflavanone 4&apos;-O-methyltransferase [Glycyrrhiza …	AT4G35160.1_O-methyltransferase family protein	IPR001077_O-methyltransferase domain; IPR036390_Winged helix DNA-binding domain superfamily; IPR016461_O-methyltransferase COMT-type; IPR012967_Plant methyltransferase dimerisation; IPR029063_S-adenosyl-L-methionine-dependent methyltransferase	IOMT	141.143	73.3667	53.2967	68.9567	137.09	223.12	63.22	42.87	86.43	90.8	21.05	55.78	83.06	67.63	66.71	72.53
		Am_Tr_020574	2072	ATY39976.1_Isoflavone O-methyltransferase [Astragalus membranaceus]	AT4G35160.1_O-methyltransferase family protein	IPR001077_O-methyltransferase domain; IPR012967_Plant methyltransferase dimerisation; IPR029063_S-adenosyl-L-methionine-dependent methyltransferase; IPR016461_O-methyltransferase COMT-type; IPR036390_Winged helix DNA-binding domain superfamily	IOMT	17.8	49.9267	24.2733	8.91	19.38	18.69	15.33	21.73	45.32	82.73	8.02	32.86	31.94	4.6	11.39	10.74
		Am_Tr_020571	1836	ATY39976.1_Isoflavone O-methyltransferase [Astragalus membranaceus]	AT4G35160.1_O-methyltransferase family protein	IPR012967_Plant methyltransferase dimerisation; IPR016461_O-methyltransferase COMT-type; IPR036390_Winged helix DNA-binding domain superfamily; IPR001077_O-methyltransferase domain; IPR029063_S-adenosyl-L-methionine-dependent methyltransferase	IOMT	69.8933	102.943	37.67	52.04	81.49	60.23	67.96	61.1	100.53	147.2	16.07	48.17	48.77	27.82	74.87	53.43
		Am_Tr_148594	1535	Q84KK6.1_RecName: Full=Isoflavone 4&apos;-O-methyltransferase; Short=GeHI4&apos;OMT; AltName: Full=2,7,4&apos;-trihydroxyisoflavanone 4&apos;-O-methyltransferase; AltName: Full=S-adenosyl-L-methionine:2,7,4&apos;-trihydroxyisoflavanone 4&apos;-O-methyltransferase [Glycyrrhiza echinata] BAC58011.1 S-adenosyl-L-methionine: 2,7,4&apos;-trihydroxyisoflavanone 4&apos;-O-methyltransferase [Glycyrrhiza …	AT4G35160.1_O-methyltransferase family protein	IPR016461_O-methyltransferase COMT-type; IPR001077_O-methyltransferase domain; IPR012967_Plant methyltransferase dimerisation; IPR036390_Winged helix DNA-binding domain superfamily; IPR029063_S-adenosyl-L-methionine-dependent methyltransferase	IOMT	12.1967	5.47667	10.17	3.50667	4.55	28.58	3.46	4.93	6.01	5.49	10.12	3.25	17.14	4.09	0.68	5.75
		Am_Tr_118861	1426	AID51450.1_isoflavone O-methyltransferase [Astragalus membranaceus]	AT4G35160.1_O-methyltransferase family protein	IPR001077_O-methyltransferase domain; IPR036390_Winged helix DNA-binding domain superfamily; IPR029063_S-adenosyl-L-methionine-dependent methyltransferase; IPR012967_Plant methyltransferase dimerisation	IOMT	11.66	0.33	0.18	0.356667	19.39	5.49	10.1	0.54	0.17	0.28	0.07	0	0.47	0.59	0	0.48
		Am_Tr_148267	1311	TKY50287.1_Isoflavone 7-O-methyltransferase [Spatholobus suberectus]	AT4G35160.1_O-methyltransferase family protein	IPR001077_O-methyltransferase domain; IPR029063_S-adenosyl-L-methionine-dependent methyltransferase; IPR036390_Winged helix DNA-binding domain superfamily; IPR016461_O-methyltransferase COMT-type; IPR012967_Plant methyltransferase dimerisation	IOMT	0.0466667	7.23	45.3167	0.383333	0	0	0.14	1.92	17.55	2.22	48.7	41.57	45.68	0.26	0.63	0.26
		Am_Tr_241121	698	ATY39976.1_Isoflavone O-methyltransferase [Astragalus membranaceus]	.	.	IOMT	5.3	15.51	6.95	3.53333	6.19	6.6	3.11	7.23	12.75	26.55	0.99	7.58	12.28	2.83	5.11	2.66
Iso-seq	2	Am_HQ_78201	1364	AEF14415.1_flavanone 3-hydroxylase [Onobrychis viciifolia]	AT3G51240.1_flavanone 3-hydroxylase, GeneName=F3H	IPR044861_Isopenicillin N synthase-like, Fe(2+) 2OG dioxygenase domain; IPR026992_Non-haem dioxygenase N-terminal domain	F3H	0	49.6	229.01	7.28	0	0	0	46.97	70.95	30.88	310.62	198	178.41	9.9	0.77	11.17
		Am_HQ_78913	1375	TKY59134.1_Flavanone 3-dioxygenase [Spatholobus suberectus]	AT3G19000.1_2-oxoglutarate (2OG) and Fe(II)-dependent oxygenase superfamily protein	IPR044861_Isopenicillin N synthase-like, Fe(2+) 2OG dioxygenase domain; IPR026992_Non-haem dioxygenase N-terminal domain	F3H	0.476667	16.74	2.72333	2.27333	0.12	0.94	0.37	24.33	21.41	4.48	2.89	3.59	1.69	1.57	4.38	0.87
rnaSPAdes	1	Am_Rn_064879	1562	AEF14415.1_flavanone 3-hydroxylase [Onobrychis viciifolia]	AT3G51240.1_flavanone 3-hydroxylase, GeneName=F3H	IPR044861_Isopenicillin N synthase-like, Fe(2+) 2OG dioxygenase domain; IPR026992_Non-haem dioxygenase N-terminal domain	F3H	0	49.2533	191.17	7.16333	0	0	0	46.88	70.05	30.83	229.4	183.36	160.75	9.59	0.87	11.03
Trinity	2	Am_Tr_110462	1567	AEF14415.1_flavanone 3-hydroxylase [Onobrychis viciifolia]	AT3G51240.1_flavanone 3-hydroxylase, GeneName=F3H	IPR044861_Isopenicillin N synthase-like, Fe(2+) 2OG dioxygenase domain; IPR026992_Non-haem dioxygenase N-terminal domain	F3H	0	37.64	147.277	5.37333	0	0	0	35.9	53.07	23.95	180.53	139.02	122.28	7.29	0.58	8.25
		Am_Tr_030096	633	TKY59134.1_Flavanone 3-dioxygenase [Spatholobus suberectus]	AT3G19000.1_2-oxoglutarate (2OG) and Fe(II)-dependent oxygenase superfamily protein	IPR044861_Isopenicillin N synthase-like, Fe(2+) 2OG dioxygenase domain	F3H	0.02	12.5	2.09667	0.973333	0	0.02	0.04	19.3	14.63	3.57	2.85	2.11	1.33	0.25	1.29	1.38
Iso-seq	3	Am_HQ_82005	1280	TKY73761.1_Flavonol synthase/flavanone 3-hydroxylase [Spatholobus suberectus]	AT5G08640.1_flavonol synthase 1, GeneName=FLS1	IPR026992_Non-haem dioxygenase N-terminal domain	FLS	0	8.92333	18.4767	0.103333	0	0	0	10.63	9.26	6.88	31.21	7.44	16.78	0	0.31	0
		Am_HQ_83112	1226	AEF14416.1_flavonol synthase [Onobrychis viciifolia]	AT5G08640.1_flavonol synthase 1, GeneName=FLS1	IPR044861_Isopenicillin N synthase-like, Fe(2+) 2OG dioxygenase domain; IPR026992_Non-haem dioxygenase N-terminal domain	FLS	0.503333	141.187	177.553	12.2567	0	0.21	1.3	123.95	170.45	129.16	240.49	137.3	154.87	15.85	8.23	12.69
		Am_HQ_83674	1205	TKY73761.1_Flavonol synthase/flavanone 3-hydroxylase [Spatholobus suberectus]	AT5G08640.1_flavonol synthase 1, GeneName=FLS1	IPR026992_Non-haem dioxygenase N-terminal domain; IPR044861_Isopenicillin N synthase-like, Fe(2+) 2OG dioxygenase domain	FLS	0	95.7133	278.717	2.97667	0	0	0	109	81.8	96.34	330.99	227.75	277.41	1.34	4.71	2.88
rnaSPAdes	3	Am_Rn_013725	3892	XP_013466706.1_flavonol synthase/flavanone 3-hydroxylase [Medicago truncatula] KEH40747.1 gibberellin 2-beta-dioxygenase [Medicago truncatula]	AT3G19000.2_2-oxoglutarate (2OG) and Fe(II)-dependent oxygenase superfamily protein	IPR044861_Isopenicillin N synthase-like, Fe(2+) 2OG dioxygenase domain; IPR026992_Non-haem dioxygenase N-terminal domain	FLS	0.126667	0.41	0.203333	27.4767	0.04	0.23	0.11	0.44	0.46	0.33	0.04	0.29	0.28	15.32	36.7	30.41
		Am_Rn_058219	1750	AEF14416.1_flavonol synthase [Onobrychis viciifolia]	AT5G08640.1_flavonol synthase 1, GeneName=FLS1	IPR044861_Isopenicillin N synthase-like, Fe(2+) 2OG dioxygenase domain; IPR026992_Non-haem dioxygenase N-terminal domain	FLS	0.3	106.923	114.063	9.43667	0	0.14	0.76	92.09	127.98	100.7	136.4	98.32	107.47	11.99	6.45	9.87
		Am_Rn_065503	1545	TKY73761.1_Flavonol synthase/flavanone 3-hydroxylase [Spatholobus suberectus]	AT5G08640.1_flavonol synthase 1, GeneName=FLS1	IPR026992_Non-haem dioxygenase N-terminal domain; IPR044861_Isopenicillin N synthase-like, Fe(2+) 2OG dioxygenase domain	FLS	0	86.1067	213.09	2.6	0	0	0	98.88	73.02	86.42	224.6	187.76	226.91	1.06	4.25	2.49
Trinity	2	Am_Tr_032687	1771	TKY73761.1_Flavonol synthase/flavanone 3-hydroxylase [Spatholobus suberectus]	AT5G08640.1_flavonol synthase 1, GeneName=FLS1	IPR026992_Non-haem dioxygenase N-terminal domain; IPR044861_Isopenicillin N synthase-like, Fe(2+) 2OG dioxygenase domain	FLS	0	54.49	135.513	1.69	0	0	0	63.03	46.71	53.73	144.9	121.52	140.12	0.69	2.64	1.74
		Am_Tr_159864	1708	AEF14416.1_flavonol synthase [Onobrychis viciifolia]	AT5G08640.1_flavonol synthase 1, GeneName=FLS1	IPR044861_Isopenicillin N synthase-like, Fe(2+) 2OG dioxygenase domain; IPR026992_Non-haem dioxygenase N-terminal domain	FLS	0.303333	86.0233	91.4567	7.48	0	0.13	0.78	76.21	101.25	80.61	113	76.85	84.52	9.76	4.99	7.69
Iso-seq	1	Am_HQ_75882	1374	AEF14411.1_anthocyanidin synthase [Onobrychis viciifolia]	AT4G22880.2_leucoanthocyanidin dioxygenase, GeneName=LDOX	IPR044861_Isopenicillin N synthase-like, Fe(2+) 2OG dioxygenase domain; IPR026992_Non-haem dioxygenase N-terminal domain	ANS	0	0.98	45.46	7.49667	0	0	0	0	2.78	0.16	46.78	38.33	51.27	7.72	1.24	13.53
rnaSPAdes	1	Am_Rn_068830	1459	AEF14411.1_anthocyanidin synthase [Onobrychis viciifolia]	AT4G22880.2_leucoanthocyanidin dioxygenase, GeneName=LDOX	IPR044861_Isopenicillin N synthase-like, Fe(2+) 2OG dioxygenase domain; IPR026992_Non-haem dioxygenase N-terminal domain	ANS	0	0.83	39.3633	7.79667	0	0	0	0	2.49	0	32.32	36.86	48.91	7.8	1.12	14.47
Trinity	1	Am_Tr_104544	1459	AEF14411.1_anthocyanidin synthase [Onobrychis viciifolia]	AT4G22880.2_leucoanthocyanidin dioxygenase, GeneName=LDOX	IPR044861_Isopenicillin N synthase-like, Fe(2+) 2OG dioxygenase domain; IPR026992_Non-haem dioxygenase N-terminal domain	ANS	0	0.636667	30.1833	5.93	0	0	0	0	1.91	0	25.47	27.96	37.12	5.98	0.85	10.96

## Sheet: Table S10
Supplementary Table 10. Expression clustering of phenylpropanoid-related unigenes (TPM ≥ 5).
Flatform	Unigene number	Unigene length	Annotation description			Unigene ID		Cluster	Average TPM				Roots			Leaves			Flowers			Stems
			NR blast	Araport11	InterPro				Roots	Leaves	Flowers	Stems	R1	R2	R3	L1	L2	L3	F1	F2	F3	S1	S2	S3
Iso-seq	7	2930	AID51445.1_phenylalanine ammonia-lyase 2 [Astragalus membranaceus]	AT2G37040.1_PHE ammonia lyase 1, GeneName=PAL1	IPR008948_L-Aspartase-like; IPR005922_Phenylalanine ammonia-lyase; IPR001106_Aromatic amino acid lyase	PAL	Am_HQ_15428 (PAL)	d	11.7833	18.2467	10.7267	24.11	16.77	16.39	2.19	31.95	18.98	3.81	13.97	15.3	2.91	40.33	29.28	2.72
		2995	AID51446.1_phenylalanine ammonia-lyase 3 [Astragalus membranaceus]	AT2G37040.1_PHE ammonia lyase 1, GeneName=PAL1	IPR005922_Phenylalanine ammonia-lyase; IPR001106_Aromatic amino acid lyase; IPR008948_L-Aspartase-like	PAL	Am_HQ_15739 (PAL)	c	7.95667	5.03667	7.57667	8.66667	6.21	16.72	0.94	2.81	8.8	3.5	11.57	6.79	4.37	15.01	6.76	4.23
		2675	QDG03197.1_phenylalanine ammonia-lyase [Glycyrrhiza uralensis]	AT3G53260.1_phenylalanine ammonia-lyase 2, GeneName=PAL2	IPR008948_L-Aspartase-like; IPR001106_Aromatic amino acid lyase; IPR005922_Phenylalanine ammonia-lyase	PAL	Am_HQ_23823 (PAL)	b	19.8567	29.9567	102.197	59.7267	10.45	28.75	20.37	29.51	34.01	26.35	83.21	95.1	128.28	60.69	75.95	42.54
		2667	ATY39966.1_Phenylalanine ammonia lyase 1 [Astragalus membranaceus]	AT2G37040.1_PHE ammonia lyase 1, GeneName=PAL1	IPR001106_Aromatic amino acid lyase; IPR005922_Phenylalanine ammonia-lyase; IPR008948_L-Aspartase-like	PAL	Am_HQ_24424 (PAL)	a	336.82	159.613	191.427	155.383	538.14	274.18	198.14	163.92	149.86	165.06	107.26	204.06	262.96	161	185.1	120.05
		2567	ATY39968.1_Phenylalanine ammonia lyase 3 [Astragalus membranaceus]	AT2G37040.1_PHE ammonia lyase 1, GeneName=PAL1	IPR005922_Phenylalanine ammonia-lyase; IPR001106_Aromatic amino acid lyase; IPR008948_L-Aspartase-like	PAL	Am_HQ_28347 (PAL)	d	32.7167	67.28	33.9833	78.7933	37.62	33.93	26.6	35.4	97.06	69.38	16.35	36.06	49.54	57.47	116.55	62.36
		2499	AID51445.1_phenylalanine ammonia-lyase 2 [Astragalus membranaceus]	AT2G37040.1_PHE ammonia lyase 1, GeneName=PAL1	IPR001106_Aromatic amino acid lyase; IPR008948_L-Aspartase-like; IPR005922_Phenylalanine ammonia-lyase	PAL	Am_HQ_29880 (PAL)	d	50.0467	113.613	81.7367	137.967	22.99	66.74	60.41	46.33	119.96	174.55	36.96	77.85	130.4	86.08	151.44	176.38
		2367	AID51446.1_phenylalanine ammonia-lyase 3 [Astragalus membranaceus]	AT2G37040.1_PHE ammonia lyase 1, GeneName=PAL1	IPR001106_Aromatic amino acid lyase; IPR008948_L-Aspartase-like; IPR005922_Phenylalanine ammonia-lyase	PAL	Am_HQ_34937 (PAL)	b	16.96	17.6767	24.5533	21.9667	4.6	38.08	8.2	2.69	20.1	30.24	7.53	18.21	47.92	12.33	20.28	33.29
rnaSPAdes	8	4411	ATY39966.1_Phenylalanine ammonia lyase 1 [Astragalus membranaceus]	AT2G37040.1_PHE ammonia lyase 1, GeneName=PAL1	IPR008948_L-Aspartase-like; IPR001106_Aromatic amino acid lyase	PAL	Am_Rn_009545 (PAL)	b	6.34	6.14667	8.71667	9.16667	12.21	2.67	4.14	4.84	6.65	6.95	7.22	8.92	10.01	8.38	8.61	10.51
		3082	AID51445.1_phenylalanine ammonia-lyase 2 [Astragalus membranaceus]	AT2G37040.1_PHE ammonia lyase 1, GeneName=PAL1	IPR008948_L-Aspartase-like; IPR005922_Phenylalanine ammonia-lyase; IPR001106_Aromatic amino acid lyase	PAL	Am_Rn_024501 (PAL)	d	48.2867	108.657	66.39	137.487	39.51	59.93	45.42	65.84	119.32	140.81	36	68.5	94.67	114.79	165.01	132.66
		3069	AID51446.1_phenylalanine ammonia-lyase 3 [Astragalus membranaceus]	AT2G37040.1_PHE ammonia lyase 1, GeneName=PAL1	IPR001106_Aromatic amino acid lyase; IPR008948_L-Aspartase-like; IPR005922_Phenylalanine ammonia-lyase	PAL	Am_Rn_024732 (PAL)	b	20.96	22.8267	26	29.3933	10.09	45.93	6.86	6.92	29.76	31.8	14.34	21.78	41.88	27.45	27.79	32.94
		2887	ATY39966.1_Phenylalanine ammonia lyase 1 [Astragalus membranaceus]	AT2G37040.1_PHE ammonia lyase 1, GeneName=PAL1	IPR001106_Aromatic amino acid lyase; IPR005922_Phenylalanine ammonia-lyase; IPR008948_L-Aspartase-like	PAL	Am_Rn_028045 (PAL)	a	308.083	165.77	176.093	158.873	502.88	255.18	166.19	172.09	152.79	172.43	81.11	197.81	249.36	161.37	193.76	121.49
		2788	QDG03197.1_phenylalanine ammonia-lyase [Glycyrrhiza uralensis]	AT3G53260.1_phenylalanine ammonia-lyase 2, GeneName=PAL2	IPR008948_L-Aspartase-like; IPR001106_Aromatic amino acid lyase; IPR005922_Phenylalanine ammonia-lyase	PAL	Am_Rn_029986 (PAL)	b	18.8033	32.54	97.6867	64.69	10.31	28.1	18	32.38	36.45	28.79	68.44	97.18	127.44	64.63	84.06	45.38
		2097	XP_004493977.1_phenylalanine ammonia-lyase 1 [Cicer arietinum]	AT2G37040.1_PHE ammonia lyase 1, GeneName=PAL1	IPR001106_Aromatic amino acid lyase; IPR008948_L-Aspartase-like; IPR005922_Phenylalanine ammonia-lyase	PAL	Am_Rn_047201 (PAL)	d	7.29	18.2933	8.61	21.2233	7.81	7.23	6.83	9.12	25.13	20.63	3.79	9.23	12.81	17.3	29.08	17.29
		1340	ATY39968.1_Phenylalanine ammonia lyase 3 [Astragalus membranaceus]	AT2G37040.1_PHE ammonia lyase 1, GeneName=PAL1	IPR008948_L-Aspartase-like; IPR001106_Aromatic amino acid lyase; IPR005922_Phenylalanine ammonia-lyase	PAL	Am_Rn_073673 (PAL)	d	30.1267	79.1	37.2467	88.85	33.33	35.91	21.14	36.64	110.95	89.71	8.85	39.01	63.88	50.18	132.72	83.65
		1326	ATY39967.1_Phenylalanine ammonia lyase 2 [Astragalus membranaceus]	AT2G37040.1_PHE ammonia lyase 1, GeneName=PAL1	IPR001106_Aromatic amino acid lyase; IPR008948_L-Aspartase-like; IPR005922_Phenylalanine ammonia-lyase	PAL	Am_Rn_074293 (PAL)	d	24.1633	79.5133	45.3633	82.6333	12.93	39.89	19.67	50.99	82.48	105.07	9.88	55.8	70.41	44.29	91.31	112.3
Trinity	9	2000	ATY39966.1_Phenylalanine ammonia lyase 1 [Astragalus membranaceus]	AT2G37040.1_PHE ammonia lyase 1, GeneName=PAL1	IPR008948_L-Aspartase-like; IPR005922_Phenylalanine ammonia-lyase; IPR001106_Aromatic amino acid lyase	PAL	Am_Tr_117304 (PAL)	a	224.23	108.267	105.24	93.3833	362.98	193.32	116.39	110.71	100.69	113.4	29.8	125.86	160.06	84.69	112.62	82.84
		1811	AID51445.1_phenylalanine ammonia-lyase 2 [Astragalus membranaceus]	AT2G37040.1_PHE ammonia lyase 1, GeneName=PAL1	IPR005922_Phenylalanine ammonia-lyase; IPR001106_Aromatic amino acid lyase; IPR008948_L-Aspartase-like	PAL	Am_Tr_034988 (PAL)	d	70.3367	123.467	83.17	155.433	48	100.72	62.29	70.96	131.88	167.56	49.95	80.49	119.07	135	176.76	154.54
		1231	ATY39968.1_Phenylalanine ammonia lyase 3 [Astragalus membranaceus]	AT2G37040.1_PHE ammonia lyase 1, GeneName=PAL1	IPR005922_Phenylalanine ammonia-lyase; IPR001106_Aromatic amino acid lyase; IPR008948_L-Aspartase-like	PAL	Am_Tr_054226 (PAL)	d	48.0833	88.2233	50.9567	98.46	44.63	64.23	35.39	46.91	119.24	98.52	22.9	51.19	78.78	77.63	130.04	87.71
		1087	ATY39967.1_Phenylalanine ammonia lyase 2 [Astragalus membranaceus]	AT2G37040.1_PHE ammonia lyase 1, GeneName=PAL1	IPR001106_Aromatic amino acid lyase; IPR008948_L-Aspartase-like	PAL	Am_Tr_034983 (PAL)	d	37.7267	83.5433	46.5167	97.0833	28.68	56.46	28.04	52.21	95.8	102.62	16.01	57.05	66.49	72.18	118.76	100.31
		1041	ATY39966.1_Phenylalanine ammonia lyase 1 [Astragalus membranaceus]	AT3G53260.1_phenylalanine ammonia-lyase 2, GeneName=PAL2	IPR001106_Aromatic amino acid lyase; IPR008948_L-Aspartase-like	PAL	Am_Tr_034987 (PAL)	a	404.983	180.047	210.08	191.653	643.71	315.3	255.94	187.33	161.77	191.04	149.02	213.57	267.65	220.51	228.06	126.39
		984	ATY39968.1_Phenylalanine ammonia lyase 3 [Astragalus membranaceus]	AT2G37040.1_PHE ammonia lyase 1, GeneName=PAL1	IPR008948_L-Aspartase-like; IPR001106_Aromatic amino acid lyase	PAL	Am_Tr_117308 (PAL)	d	19.3633	37.0933	18.69	44.8167	20.39	24.04	13.66	19.92	48.78	42.58	6.04	19.54	30.49	27.61	62.07	44.77
		956	ATY39967.1_Phenylalanine ammonia lyase 2 [Astragalus membranaceus]	AT2G37040.1_PHE ammonia lyase 1, GeneName=PAL1	IPR001106_Aromatic amino acid lyase; IPR008948_L-Aspartase-like	PAL	Am_Tr_034984 (PAL)	d	27.3033	63.2767	35.09	67.96	19.95	37.98	23.98	37.45	68.96	83.42	7.94	37.51	59.82	37.33	79.7	86.85
		849	ATY39968.1_Phenylalanine ammonia lyase 3 [Astragalus membranaceus]	AT2G37040.1_PHE ammonia lyase 1, GeneName=PAL1	IPR001106_Aromatic amino acid lyase; IPR008948_L-Aspartase-like	PAL	Am_Tr_034986 (PAL)	d	4.17333	8.46333	3.52	8.18333	5.19	4.41	2.92	4.01	15.26	6.12	0.64	4.08	5.84	3.68	14.03	6.84
		478	ATY39968.1_Phenylalanine ammonia lyase 3 [Astragalus membranaceus]	AT2G37040.1_PHE ammonia lyase 1, GeneName=PAL1	.	PAL	Am_Tr_096852 (PAL)	d	22.2667	39.5533	17.5367	50.7633	28.08	18.94	19.78	19.74	55.36	43.56	12.17	19.82	20.62	42.86	78.92	30.51
Iso-seq	4	2030	AID51447.1_cinnamate 4-hydroxylase 2 [Astragalus membranaceus]	AT2G30490.1_cinnamate-4-hydroxylase, GeneName=C4H	IPR036396_Cytochrome P450 superfamily; IPR001128_Cytochrome P450; IPR002401_Cytochrome P450, E-class, group I	C4H	Am_HQ_49575 (C4H)	c	253.367	34.9033	57.6333	148.053	218.91	388.92	152.27	18.57	46.29	39.85	43.02	50.18	79.7	135.84	159.17	149.15
		1924	AEH68208.1_cinnamate 4-hydroxylase [Astragalus mongholicus]	AT2G30490.1_cinnamate-4-hydroxylase, GeneName=C4H	IPR001128_Cytochrome P450; IPR036396_Cytochrome P450 superfamily; IPR002401_Cytochrome P450, E-class, group I	C4H	Am_HQ_54640 (C4H)	b	6.41667	8.01667	11.1967	4.48333	18.19	1.06	0	21.85	1.67	0.53	30.99	1.49	1.11	10.53	2.2	0.72
		1855	AEH68208.1_cinnamate 4-hydroxylase [Astragalus mongholicus]	AT2G30490.1_cinnamate-4-hydroxylase, GeneName=C4H	IPR001128_Cytochrome P450; IPR036396_Cytochrome P450 superfamily; IPR002401_Cytochrome P450, E-class, group I	C4H	Am_HQ_56959 (C4H)	b	32.24	54.2467	77.5933	26.11	27.64	41.82	27.26	32.21	64.78	65.75	33.23	93.13	106.42	19.32	22.37	36.64
		1795	TKY50816.1_trans-cinnamate 4-monooxygenase [Spatholobus suberectus]	AT2G30490.1_cinnamate-4-hydroxylase, GeneName=C4H	IPR002401_Cytochrome P450, E-class, group I; IPR001128_Cytochrome P450; IPR036396_Cytochrome P450 superfamily	C4H	Am_HQ_59770 (C4H)	a	689.267	0.553333	7.17667	8.92333	526.75	857.3	683.75	0.46	0.45	0.75	6.64	6.45	8.44	8.25	4.7	13.82
rnaSPAdes	5	3244	ATY39969.1_Cinnamate-4-hydroxylase 1 [Astragalus membranaceus]	AT2G30490.1_cinnamate-4-hydroxylase, GeneName=C4H	IPR002401_Cytochrome P450, E-class, group I; IPR001128_Cytochrome P450; IPR036396_Cytochrome P450 superfamily	C4H	Am_Rn_021865 (C4H)	c	5.56	1.32	2.15	7.87333	9.08	4.85	2.75	1.23	0.44	2.29	0.69	1.73	4.03	5.29	6.61	11.72
		2786	AID51447.1_cinnamate 4-hydroxylase 2 [Astragalus membranaceus]	AT2G30490.1_cinnamate-4-hydroxylase, GeneName=C4H	IPR036396_Cytochrome P450 superfamily; IPR001128_Cytochrome P450; IPR002401_Cytochrome P450, E-class, group I	C4H	Am_Rn_030019 (C4H)	c	175.163	27.3733	38.73	113.73	152.85	276.8	95.84	14.26	36.61	31.25	24.14	36.36	55.69	102.3	126.25	112.64
		2064	AEH68208.1_cinnamate 4-hydroxylase [Astragalus mongholicus]	AT2G30490.1_cinnamate-4-hydroxylase, GeneName=C4H	IPR001128_Cytochrome P450; IPR036396_Cytochrome P450 superfamily; IPR002401_Cytochrome P450, E-class, group I	C4H	Am_Rn_048175 (C4H)	b	37.04	65.3233	81.33	32.2467	46.7	38.95	25.47	55.76	68.87	71.34	50.98	92.26	100.75	30.2	27.25	39.29
		1916	TKY50816.1_trans-cinnamate 4-monooxygenase [Spatholobus suberectus]	AT2G30490.1_cinnamate-4-hydroxylase, GeneName=C4H	IPR036396_Cytochrome P450 superfamily; IPR001128_Cytochrome P450; IPR002401_Cytochrome P450, E-class, group I	C4H	Am_Rn_052812 (C4H)	a	16.36	0	0.103333	0.51	23.69	12.44	12.95	0	0	0	0	0.31	0	0	0.42	1.11
		1841	XP_027366179.1_cytochrome P450 CYP73A100-like [Abrus precatorius]	AT2G30490.1_cinnamate-4-hydroxylase, GeneName=C4H	IPR002401_Cytochrome P450, E-class, group I; IPR001128_Cytochrome P450; IPR036396_Cytochrome P450 superfamily	C4H	Am_Rn_055170 (C4H)	a	633.963	0.403333	6.54333	9.35	500.12	814.8	586.97	0.52	0.28	0.41	5.4	6.25	7.98	9.07	4.45	14.53
Trinity	6	3360	AID51447.1_cinnamate 4-hydroxylase 2 [Astragalus membranaceus]	AT2G30490.1_cinnamate-4-hydroxylase, GeneName=C4H	IPR002401_Cytochrome P450, E-class, group I; IPR001128_Cytochrome P450; IPR036396_Cytochrome P450 superfamily	C4H	Am_Tr_059710 (C4H)	c	5.16333	1.09667	1.72667	5.37667	7.72	4.61	3.16	1.01	0.82	1.46	0.48	1.53	3.17	3.23	4.22	8.68
		2741	AID51447.1_cinnamate 4-hydroxylase 2 [Astragalus membranaceus]	AT2G30490.1_cinnamate-4-hydroxylase, GeneName=C4H	IPR036396_Cytochrome P450 superfamily; IPR001128_Cytochrome P450; IPR002401_Cytochrome P450, E-class, group I	C4H	Am_Tr_059711 (C4H)	c	151.967	20.5633	28.4333	83.37	130.8	240.97	84.13	11.13	26.96	23.6	18.64	26.45	40.21	71.28	93.44	85.39
		2462	XP_031385586.1_trans-cinnamate 4-monooxygenase isoform X2 [Punica granatum]	AT2G30490.1_cinnamate-4-hydroxylase, GeneName=C4H	IPR001128_Cytochrome P450; IPR036396_Cytochrome P450 superfamily; IPR002401_Cytochrome P450, E-class, group I	C4H	Am_Tr_059709 (C4H)	c	12.13	1.18667	2.56667	5.80667	8.3	16.51	11.58	0	1.98	1.58	1.62	2.25	3.83	11.23	4.2	1.99
		2020	AEH68208.1_cinnamate 4-hydroxylase [Astragalus mongholicus]	AT2G30490.1_cinnamate-4-hydroxylase, GeneName=C4H	IPR001128_Cytochrome P450; IPR036396_Cytochrome P450 superfamily; IPR002401_Cytochrome P450, E-class, group I	C4H	Am_Tr_003806 (C4H)	b	32.09	49.8	62.2567	24.0433	39.03	35.21	22.03	43.56	51.51	54.33	40.05	69.89	76.83	23.52	19.81	28.8
		1942	XP_027934411.1_cytochrome P450 CYP73A100-like [Vigna unguiculata] QCE08638.1 trans-cinnamate 4-monooxygenase [Vigna unguiculata]	AT2G30490.1_cinnamate-4-hydroxylase, GeneName=C4H	IPR036396_Cytochrome P450 superfamily; IPR001128_Cytochrome P450; IPR002401_Cytochrome P450, E-class, group I	C4H	Am_Tr_174436 (C4H)	a	20.3267	0	0.106667	0.45	30.49	13.43	17.06	0	0	0	0	0.32	0	0	0.29	1.06
		1827	TKY50816.1_trans-cinnamate 4-monooxygenase [Spatholobus suberectus]	AT2G30490.1_cinnamate-4-hydroxylase, GeneName=C4H	IPR002401_Cytochrome P450, E-class, group I; IPR001128_Cytochrome P450; IPR036396_Cytochrome P450 superfamily	C4H	Am_Tr_174435 (C4H)	a	598.81	0.49	5.37333	7.22667	447.88	768.86	579.69	0.4	0.39	0.68	4.52	4.93	6.67	7.02	3.83	10.83
Iso-seq	18	2974	QDG03189.1_4-coumarate:CoA ligase [Glycyrrhiza uralensis]	AT3G21240.1_4-coumarate:CoA ligase 2, GeneName=4CL2	IPR025110_AMP-binding enzyme, C-terminal domain; IPR000873_AMP-dependent synthetase/ligase	4CL	Am_HQ_13075 (4CL)	c	12.8633	11.4467	16.6667	38.5567	5.28	24.39	8.92	5.06	15.84	13.44	18.33	14.13	17.54	32.14	47.04	36.49
		2401	ATY39971.1_4-coumaroyl:CoA-ligase [Astragalus membranaceus]	AT1G20510.3_OPC-8:0 CoA ligase1, GeneName=OPCL1	IPR000873_AMP-dependent synthetase/ligase	4CL	Am_HQ_33841 (4CL)	d	15.26	31.0767	11.93	29.7433	2.82	5.35	37.61	42.98	1.02	49.23	5.99	0.65	29.15	36.07	0.56	52.6
		2201	PNX95884.1_4-coumarate CoA ligase, partial [Trifolium pratense]	AT1G51680.2_4-coumarate:CoA ligase 1, GeneName=4CL1	IPR000873_AMP-dependent synthetase/ligase	4CL	Am_HQ_41737 (4CL)	c	19.7767	8.34	12.1333	25.0867	11.16	33.55	14.62	6.07	10.33	8.62	5.55	12.91	17.94	13.81	35.15	26.3
		2180	XP_004511423.1_4-coumarate--CoA ligase 2 [Cicer arietinum]	AT1G65060.1_4-coumarate:CoA ligase 3, GeneName=4CL3	IPR000873_AMP-dependent synthetase/ligase; IPR025110_AMP-binding enzyme, C-terminal domain	4CL	Am_HQ_42278 (4CL)	a	86.9067	71.64	52.35	49.55	49.12	167.23	44.37	46.05	85.59	83.28	32.44	52.26	72.35	36.15	55.14	57.36
		2124	XP_004512448.1_4-coumarate--CoA ligase-like 6 isoform X1 [Cicer arietinum]	AT4G19010.1_AMP-dependent synthetase and ligase family protein	IPR000873_AMP-dependent synthetase/ligase; IPR025110_AMP-binding enzyme, C-terminal domain	4CL	Am_HQ_44885 (4CL)	b	1.39	4.87667	7.04	10.2267	0.44	2.77	0.96	3.67	5.87	5.09	5.8	7.18	8.14	9.78	9	11.9
		2113	QDG03189.1_4-coumarate:CoA ligase [Glycyrrhiza uralensis]	AT3G21240.1_4-coumarate:CoA ligase 2, GeneName=4CL2	IPR025110_AMP-binding enzyme, C-terminal domain; IPR000873_AMP-dependent synthetase/ligase	4CL	Am_HQ_45655 (4CL)	c	111.453	26.59	50.7967	99.16	89.96	159.73	84.67	18.73	33.4	27.64	25.47	59	67.92	61.06	147.18	89.24
		2088	QDG03189.1_4-coumarate:CoA ligase [Glycyrrhiza uralensis]	AT3G21240.1_4-coumarate:CoA ligase 2, GeneName=4CL2	IPR025110_AMP-binding enzyme, C-terminal domain; IPR000873_AMP-dependent synthetase/ligase	4CL	Am_HQ_46786 (4CL)	b	9.57	3.35333	24.82	13.1033	6.32	14.92	7.47	2.49	3.99	3.58	20.97	26.63	26.86	8.87	19.95	10.49
		2076	ATY39971.1_4-coumaroyl:CoA-ligase [Astragalus membranaceus]	AT1G20510.1_OPC-8:0 CoA ligase1, GeneName=OPCL1	IPR025110_AMP-binding enzyme, C-terminal domain; IPR000873_AMP-dependent synthetase/ligase	4CL	Am_HQ_46881 (4CL)	d	51.88	79.4667	35.78	95.07	7.43	94.95	53.26	80.66	87.09	70.65	28.35	39.87	39.12	105.96	99.45	79.8
		2068	XP_045803451.1_4-coumarate--CoA ligase-like 9 [Trifolium pratense]	AT5G63380.1_AMP-dependent synthetase and ligase family protein	IPR000873_AMP-dependent synthetase/ligase; IPR025110_AMP-binding enzyme, C-terminal domain	4CL	Am_HQ_47701 (4CL)	b	7.80667	11.8233	12.0267	14.2967	4.85	10.51	8.06	10.47	14.22	10.78	13.22	12.49	10.37	12.61	16.72	13.56
		2002	AID51448.1_4-coumaroyl:CoA-ligase [Astragalus membranaceus]	AT3G21240.1_4-coumarate:CoA ligase 2, GeneName=4CL2	IPR000873_AMP-dependent synthetase/ligase; IPR025110_AMP-binding enzyme, C-terminal domain	4CL	Am_HQ_48882 (4CL)	c	30.0833	2.28667	6.53	21.9067	43.6	28.86	17.79	2.13	2.47	2.26	7.17	5.58	6.84	23.86	26.69	15.17
		1919	TKY54583.1_4-coumarate--CoA ligase 1 [Spatholobus suberectus]	AT1G51680.1_4-coumarate:CoA ligase 1, GeneName=4CL1	IPR000873_AMP-dependent synthetase/ligase; IPR025110_AMP-binding enzyme, C-terminal domain	4CL	Am_HQ_54948 (4CL)	b	0.103333	1.42333	21.75	0.0833333	0	0	0.31	0.67	2.31	1.29	8.69	32.74	23.82	0.06	0.13	0.06
		1775	XP_004515681.1_4-coumarate--CoA ligase-like 9 [Cicer arietinum]	AT5G63380.1_AMP-dependent synthetase and ligase family protein	IPR025110_AMP-binding enzyme, C-terminal domain; IPR000873_AMP-dependent synthetase/ligase	4CL	Am_HQ_59428 (4CL)	d	0.05	33.0167	2.69	5.64333	0	0.15	0	30.72	34.59	33.74	1.75	2.6	3.72	6.02	4.37	6.54
		1469	XP_004515681.1_4-coumarate--CoA ligase-like 9 [Cicer arietinum]	AT5G63380.1_AMP-dependent synthetase and ligase family protein	IPR000873_AMP-dependent synthetase/ligase	4CL	Am_HQ_75603 (4CL)	d	2.5	8.96	1.34333	1.57	4.46	0.81	2.23	7.01	12.06	7.81	0.33	1.23	2.47	0.62	2.08	2.01
		2830	PNX74615.1_4-coumarate-CoA ligase 10-like protein [Trifolium pratense]	AT3G48990.1_AMP-dependent synthetase and ligase family protein, GeneName=AAE3	IPR000873_AMP-dependent synthetase/ligase	4CL	Am_HQ_19597 (4CL)	b	4.74667	11.86	16.4267	1.73333	2.08	6.87	5.29	11.41	14.41	9.76	9.37	16	23.91	2.16	1.95	1.09
		2456	PNX74615.1_4-coumarate-CoA ligase 10-like protein [Trifolium pratense]	AT3G48990.1_AMP-dependent synthetase and ligase family protein, GeneName=AAE3	.	4CL	Am_HQ_31440 (4CL)	b	28.8833	100.933	79.7033	9.35333	20.04	42.47	24.14	92.85	110.9	99.05	48.98	93.93	96.2	10.84	10.23	6.99
		2357	PNX71577.1_4-coumarate-CoA ligase 9-like protein, partial [Trifolium pratense]	AT5G63380.1_AMP-dependent synthetase and ligase family protein	IPR000873_AMP-dependent synthetase/ligase	4CL	Am_HQ_35242 (4CL)	b	2.55667	4.72333	5.84333	5.05	1.21	3.4	3.06	4.89	5.16	4.12	4.45	7.82	5.26	4.67	4.9	5.58
		2078	PNX74615.1_4-coumarate-CoA ligase 10-like protein [Trifolium pratense]	AT3G48990.1_AMP-dependent synthetase and ligase family protein, GeneName=AAE3	.	4CL	Am_HQ_43470 (4CL)	b	15.7467	30.0967	25.8733	6.23	11.71	21.17	14.36	29.27	31.73	29.29	15.42	33.27	28.93	7.12	6.43	5.14
		1992	PNY17269.1_4-coumarate-CoA ligase 7-like protein [Trifolium pratense]	AT4G05160.1_AMP-dependent synthetase and ligase family protein	IPR025110_AMP-binding enzyme, C-terminal domain; IPR000873_AMP-dependent synthetase/ligase	4CL	Am_HQ_50709 (4CL)	d	14.65	79.98	51.9667	19.9633	6.93	24.18	12.84	79.13	51.64	109.17	35.09	50.76	70.05	23.93	13.11	22.85
rnaSPAdes	17	6485	PNY17269.1_4-coumarate-CoA ligase 7-like protein [Trifolium pratense]	AT4G05160.1_AMP-dependent synthetase and ligase family protein	IPR000873_AMP-dependent synthetase/ligase; IPR025110_AMP-binding enzyme, C-terminal domain	4CL	Am_Rn_002313 (4CL)	d	3.63	26.7367	15.61	6.06667	0.97	7.03	2.89	26.24	18.05	35.92	8.64	16.65	21.54	7.35	4.63	6.22
		4609	PNX74615.1_4-coumarate-CoA ligase 10-like protein [Trifolium pratense]	AT3G48990.1_AMP-dependent synthetase and ligase family protein, GeneName=AAE3	IPR000873_AMP-dependent synthetase/ligase	4CL	Am_Rn_008298 (4CL)	b	3.54333	8.31	10.58	1.09667	2.34	4.81	3.48	7.57	8.57	8.79	5.36	11.17	15.21	1.28	1.24	0.77
		3972	ATY39971.1_4-coumaroyl:CoA-ligase [Astragalus membranaceus]	AT1G20510.1_OPC-8:0 CoA ligase1, GeneName=OPCL1	IPR025110_AMP-binding enzyme, C-terminal domain; IPR000873_AMP-dependent synthetase/ligase	4CL	Am_Rn_012986 (4CL)	d	13.49	31.4167	13.4533	38.03	1.1	17.95	21.42	32.7	23.06	38.49	13.52	9.81	17.03	43.33	30.94	39.82
		3933	XP_004515681.1_4-coumarate--CoA ligase-like 9 [Cicer arietinum]	AT5G63380.1_AMP-dependent synthetase and ligase family protein	IPR025110_AMP-binding enzyme, C-terminal domain; IPR000873_AMP-dependent synthetase/ligase	4CL	Am_Rn_013340 (4CL)	d	0.856667	16.7733	1.74	3.25667	1.49	0.4	0.68	15.06	18.25	17.01	0.83	1.74	2.65	2.82	3.01	3.94
		3750	QDG03189.1_4-coumarate:CoA ligase [Glycyrrhiza uralensis]	AT3G21240.1_4-coumarate:CoA ligase 2, GeneName=4CL2	IPR025110_AMP-binding enzyme, C-terminal domain; IPR000873_AMP-dependent synthetase/ligase	4CL	Am_Rn_015230 (4CL)	c	69.3067	26.6733	44.71	102.853	53.34	105.2	49.38	16.85	31.41	31.76	30.25	48.88	55	74.22	141.23	93.11
		2932	AID51448.1_4-coumaroyl:CoA-ligase [Astragalus membranaceus]	AT3G21240.1_4-coumarate:CoA ligase 2, GeneName=4CL2	IPR000873_AMP-dependent synthetase/ligase; IPR025110_AMP-binding enzyme, C-terminal domain	4CL	Am_Rn_027231 (4CL)	c	12.7433	0.7	1.61333	9.30333	22.1	10.36	5.77	1.13	0.62	0.35	1.32	2.13	1.39	14.97	8.48	4.46
		2770	PNX74615.1_4-coumarate-CoA ligase 10-like protein [Trifolium pratense]	AT3G48990.1_AMP-dependent synthetase and ligase family protein, GeneName=AAE3	.	4CL	Am_Rn_030362 (4CL)	b	49.3367	117.637	102.513	14.04	26.5	73.82	47.69	111.04	131.99	109.88	40.05	126.58	140.91	15.5	15.18	11.44
		2627	AID51448.1_4-coumaroyl:CoA-ligase [Astragalus membranaceus]	AT3G21240.1_4-coumarate:CoA ligase 2, GeneName=4CL2	IPR000873_AMP-dependent synthetase/ligase; IPR025110_AMP-binding enzyme, C-terminal domain	4CL	Am_Rn_033433 (4CL)	c	9.96	1.34667	4.01667	10.38	9.57	12.95	7.36	0.72	1.54	1.78	4.59	2.64	4.82	6.82	15.4	8.92
		2508	TKY54583.1_4-coumarate--CoA ligase 1 [Spatholobus suberectus]	AT1G51680.1_4-coumarate:CoA ligase 1, GeneName=4CL1	IPR025110_AMP-binding enzyme, C-terminal domain; IPR000873_AMP-dependent synthetase/ligase	4CL	Am_Rn_036208 (4CL)	b	0.0366667	1.14	15.8433	0.0533333	0	0	0.11	0.58	2.03	0.81	5.48	23.37	18.68	0.05	0.11	0
		2455	XP_004511423.1_4-coumarate--CoA ligase 2 [Cicer arietinum]	AT1G65060.1_4-coumarate:CoA ligase 3, GeneName=4CL3	IPR000873_AMP-dependent synthetase/ligase; IPR025110_AMP-binding enzyme, C-terminal domain	4CL	Am_Rn_037463 (4CL)	a	75.9333	72.4933	46.59	49.2667	42.89	149.32	35.59	47.16	85.64	84.68	24.23	49.14	66.4	35.68	56.12	56
		2320	ATY39971.1_4-coumaroyl:CoA-ligase [Astragalus membranaceus]	AT1G20510.3_OPC-8:0 CoA ligase1, GeneName=OPCL1	IPR000873_AMP-dependent synthetase/ligase	4CL	Am_Rn_040862 (4CL)	d	33.1467	63.4067	20.9633	62.6033	6.52	51.34	41.58	76.75	46.78	66.69	2.96	20.71	39.22	65.5	47.69	74.62
		2250	XP_004512448.1_4-coumarate--CoA ligase-like 6 isoform X1 [Cicer arietinum]	AT4G19010.1_AMP-dependent synthetase and ligase family protein	IPR025110_AMP-binding enzyme, C-terminal domain; IPR000873_AMP-dependent synthetase/ligase	4CL	Am_Rn_042798 (4CL)	b	1.21667	5.12333	6.47667	10.9733	0.43	2.39	0.83	4.03	5.87	5.47	4.74	6.89	7.8	10.15	9.82	12.95
		2168	PNX95884.1_4-coumarate CoA ligase, partial [Trifolium pratense]	AT3G21240.2_4-coumarate:CoA ligase 2, GeneName=4CL2	IPR000873_AMP-dependent synthetase/ligase	4CL	Am_Rn_045123 (4CL)	c	21.93	9.64	14.3367	17.4567	13.65	39.63	12.51	6.72	16.61	5.59	0.57	17.95	24.49	0	30.38	21.99
		1750	XP_045803451.1_4-coumarate--CoA ligase-like 9 [Trifolium pratense]	AT5G63380.1_AMP-dependent synthetase and ligase family protein	IPR025110_AMP-binding enzyme, C-terminal domain; IPR000873_AMP-dependent synthetase/ligase	4CL	Am_Rn_058222 (4CL)	b	8.83667	17.84	16.37	19.93	5.62	12	8.89	17.08	21.09	15.35	11.47	20.96	16.68	16.81	22.45	20.53
		1685	PNX95884.1_4-coumarate CoA ligase, partial [Trifolium pratense]	AT1G51680.2_4-coumarate:CoA ligase 1, GeneName=4CL1	IPR000873_AMP-dependent synthetase/ligase	4CL	Am_Rn_060471 (4CL)	b	0.363333	0.39	9.08667	0.676667	0.14	0.95	0	0.15	0.62	0.4	2.66	11.27	13.33	0.31	0.79	0.93
		1096	PNX77888.1_4-coumarate-CoA ligase 9-like protein, partial [Trifolium pratense]	AT5G63380.1_AMP-dependent synthetase and ligase family protein	.	4CL	Am_Rn_084592 (4CL)	c	1.46333	2.35	2.00333	6.25333	2.93	0.86	0.6	3	1.38	2.67	3.86	0.68	1.47	15.64	1.7	1.42
		696	PNX77888.1_4-coumarate-CoA ligase 9-like protein, partial [Trifolium pratense]	AT5G63380.1_AMP-dependent synthetase and ligase family protein	IPR000873_AMP-dependent synthetase/ligase; IPR025110_AMP-binding enzyme, C-terminal domain	4CL	Am_Rn_109116 (4CL)	b	8.88	13.0867	15.5333	15.5767	3.77	12.83	10.04	12.4	14.08	12.78	20.93	14.52	11.15	15.8	17.33	13.6
Trinity	20	4071	PNY17269.1_4-coumarate-CoA ligase 7-like protein [Trifolium pratense]	AT4G05160.1_AMP-dependent synthetase and ligase family protein	IPR000873_AMP-dependent synthetase/ligase; IPR025110_AMP-binding enzyme, C-terminal domain	4CL	Am_Tr_015739 (4CL)	a	7.15333	5.02333	3.43	2.77333	4.03	3.21	14.22	6.94	3.78	4.35	3.91	3.28	3.1	5.26	1.53	1.53
		3941	PNY17269.1_4-coumarate-CoA ligase 7-like protein [Trifolium pratense]	AT4G05160.1_AMP-dependent synthetase and ligase family protein	IPR000873_AMP-dependent synthetase/ligase; IPR025110_AMP-binding enzyme, C-terminal domain	4CL	Am_Tr_015734 (4CL)	d	23.36	38.2933	26.5133	18.5567	9.71	29.6	30.77	28.37	33.62	52.89	15.38	28.36	35.8	17.41	18.35	19.91
		3800	QDG03189.1_4-coumarate:CoA ligase [Glycyrrhiza uralensis]	AT3G21240.1_4-coumarate:CoA ligase 2, GeneName=4CL2	IPR000873_AMP-dependent synthetase/ligase; IPR025110_AMP-binding enzyme, C-terminal domain	4CL	Am_Tr_041483 (4CL)	c	73.77	24.5267	42.4533	84.6033	53.65	114.56	53.1	15.75	30.77	27.06	24.29	47.88	55.19	56.18	118.09	79.54
		3678	PNX74615.1_4-coumarate-CoA ligase 10-like protein [Trifolium pratense]	AT3G48990.1_AMP-dependent synthetase and ligase family protein, GeneName=AAE3	IPR000873_AMP-dependent synthetase/ligase	4CL	Am_Tr_018126 (4CL)	b	2.37667	9.33	7.83333	0.56	1.73	3.39	2.01	7.13	10.81	10.05	4.51	7.74	11.25	0.74	0.72	0.22
		3273	ATY39971.1_4-coumaroyl:CoA-ligase [Astragalus membranaceus]	AT1G20510.3_OPC-8:0 CoA ligase1, GeneName=OPCL1	IPR000873_AMP-dependent synthetase/ligase	4CL	Am_Tr_071675 (4CL)	d	8.07667	11.7	5.21	16.51	0.6	15.65	7.98	11.75	11.89	11.46	6.13	3.94	5.56	20.64	14.4	14.49
		3183	PNY17269.1_4-coumarate-CoA ligase 7-like protein [Trifolium pratense]	AT4G05160.1_AMP-dependent synthetase and ligase family protein	IPR000873_AMP-dependent synthetase/ligase; IPR025110_AMP-binding enzyme, C-terminal domain	4CL	Am_Tr_015732 (4CL)	d	1.02	6.91667	1.41333	1.38667	0.33	1.36	1.37	10.35	1.58	8.82	0.29	1.24	2.71	3.22	0.63	0.31
		2928	PNX74615.1_4-coumarate-CoA ligase 10-like protein [Trifolium pratense]	AT3G48990.1_AMP-dependent synthetase and ligase family protein, GeneName=AAE3	IPR000873_AMP-dependent synthetase/ligase	4CL	Am_Tr_018129 (4CL)	a	11.76	0.78	0.813333	1.59667	9.13	11.14	15.01	1.24	0.49	0.61	0.53	0.89	1.02	4.34	0.37	0.08
		2641	AID51448.1_4-coumaroyl:CoA-ligase [Astragalus membranaceus]	AT3G21240.2_4-coumarate:CoA ligase 2, GeneName=4CL2	IPR000873_AMP-dependent synthetase/ligase	4CL	Am_Tr_160621 (4CL)	c	10.3833	0.833333	2.27333	8.07667	13.92	8.93	8.3	0.96	0.98	0.56	2.62	1.59	2.61	9.37	9.24	5.62
		2508	TKY54583.1_4-coumarate--CoA ligase 1 [Spatholobus suberectus]	AT1G51680.1_4-coumarate:CoA ligase 1, GeneName=4CL1	IPR025110_AMP-binding enzyme, C-terminal domain; IPR000873_AMP-dependent synthetase/ligase	4CL	Am_Tr_207368 (4CL)	b	0.03	0.876667	11.87	0.0433333	0	0	0.09	0.45	1.55	0.63	4.25	17.79	13.57	0.04	0.09	0
		2433	XP_004511423.1_4-coumarate--CoA ligase 2 [Cicer arietinum]	AT1G65060.1_4-coumarate:CoA ligase 3, GeneName=4CL3	IPR000873_AMP-dependent synthetase/ligase; IPR025110_AMP-binding enzyme, C-terminal domain	4CL	Am_Tr_093803 (4CL)	a	68.9067	56.4267	34.3533	37.7733	36.22	136.47	34.03	36.64	66.36	66.28	14.79	37.53	50.74	27.58	42.73	43.01
		2318	XP_004515681.1_4-coumarate--CoA ligase-like 9 [Cicer arietinum]	AT5G63380.1_AMP-dependent synthetase and ligase family protein	IPR025110_AMP-binding enzyme, C-terminal domain; IPR000873_AMP-dependent synthetase/ligase	4CL	Am_Tr_133602 (4CL)	d	0.03	24.8133	1.51667	3.87333	0	0.09	0	23.16	25.2	26.08	0.72	1.38	2.45	3.94	2.95	4.73
		2150	ATY39971.1_4-coumaroyl:CoA-ligase [Astragalus membranaceus]	AT1G20510.1_OPC-8:0 CoA ligase1, GeneName=OPCL1	IPR000873_AMP-dependent synthetase/ligase; IPR025110_AMP-binding enzyme, C-terminal domain	4CL	Am_Tr_071674 (4CL)	d	47.4067	79.2733	27.71	81.05	7.26	67.67	67.29	89.99	56.24	91.59	12.43	24.93	45.77	87.85	61.68	93.62
		2115	XP_004512448.1_4-coumarate--CoA ligase-like 6 isoform X1 [Cicer arietinum]	AT4G19010.1_AMP-dependent synthetase and ligase family protein	IPR025110_AMP-binding enzyme, C-terminal domain; IPR000873_AMP-dependent synthetase/ligase	4CL	Am_Tr_053753 (4CL)	b	0.896667	2.88333	4.27	6.52333	0.31	1.58	0.8	2.11	3.35	3.19	3.51	4.49	4.81	6.91	5.74	6.92
		2078	AID51448.1_4-coumaroyl:CoA-ligase [Astragalus membranaceus]	AT3G21240.1_4-coumarate:CoA ligase 2, GeneName=4CL2	IPR025110_AMP-binding enzyme, C-terminal domain; IPR000873_AMP-dependent synthetase/ligase	4CL	Am_Tr_160622 (4CL)	c	8.92667	0.843333	1.66333	6.10333	11.55	10.16	5.07	0.52	1.06	0.95	1.01	2.07	1.91	5.47	8.36	4.48
		2076	XP_045803451.1_4-coumarate--CoA ligase-like 9 [Trifolium pratense]	AT5G63380.1_AMP-dependent synthetase and ligase family protein	IPR000873_AMP-dependent synthetase/ligase	4CL	Am_Tr_019735 (4CL)	b	7.44	11.3067	11.12	12.75	3.85	9.85	8.62	10.56	12.13	11.23	10.38	13.35	9.63	11.17	13.57	13.51
		1621	AID51448.1_4-coumaroyl:CoA-ligase [Astragalus membranaceus]	AT3G21240.2_4-coumarate:CoA ligase 2, GeneName=4CL2	IPR000873_AMP-dependent synthetase/ligase	4CL	Am_Tr_160617 (4CL)	c	7.59333	0.316667	1.18	5.55333	10	9.8	2.98	0.37	0	0.58	1.14	1.29	1.11	6.71	6.48	3.47
		1613	KHN12599.1_4-coumarate--CoA ligase-like 5 [Glycine soja]	AT1G20510.1_OPC-8:0 CoA ligase1, GeneName=OPCL1	.	4CL	Am_Tr_071678 (4CL)	d	3.65333	5.31667	1.3	5.13333	0	0	10.96	11.81	1.19	2.95	2.09	0.34	1.47	12.8	0.8	1.8
		719	PNX71577.1_4-coumarate-CoA ligase 9-like protein, partial [Trifolium pratense]	AT5G63380.1_AMP-dependent synthetase and ligase family protein	IPR000873_AMP-dependent synthetase/ligase	4CL	Am_Tr_133217 (4CL)	d	3.25333	6.65333	5.33	7.23333	2.79	4.84	2.13	8.19	8.15	3.62	3.82	6.87	5.3	7.7	7.55	6.45
		539	PNX54643.1_4-coumarate-CoA ligase 1-like protein [Trifolium pratense]	AT3G21240.1_4-coumarate:CoA ligase 2, GeneName=4CL2	.	4CL	Am_Tr_041484 (4CL)	c	16.9567	5.63667	18.6867	23.7767	11.25	27.99	11.63	3.46	6.98	6.47	18.47	19.15	18.44	13.95	35.69	21.69
		503	KAH1246096.1_4-coumarate--CoA ligase-like 9 [Glycine max]	.	.	4CL	Am_Tr_133216 (4CL)	c	5.32333	6.34	5.63667	8.58333	4.24	8.44	3.29	5.29	10.01	3.72	2.39	8.95	5.57	5.5	11.39	8.86
Iso-seq	9	1748	XP_004493096.1_chalcone synthase [Cicer arietinum]	AT5G13930.1_Chalcone and stilbene synthase family protein, GeneName=TT4	IPR016039_Thiolase-like; IPR001099_Chalcone/stilbene synthase, N-terminal; IPR011141_Polyketide synthase, type III; IPR012328_Chalcone/stilbene synthase, C-terminal	CHS	Am_HQ_62204 (CHS)	b	0	121.383	212.983	7.53	0	0	0	116.1	142.08	105.97	203.47	199.67	235.81	13.76	2.53	6.3
		1692	ADZ45299.1_chalcone synthase 1 [Astragalus membranaceus]	AT5G13930.1_Chalcone and stilbene synthase family protein, GeneName=TT4	IPR012328_Chalcone/stilbene synthase, C-terminal; IPR016039_Thiolase-like; IPR001099_Chalcone/stilbene synthase, N-terminal	CHS	Am_HQ_65932 (CHS)	b	3.96	0.99	7.62333	1.13	5.73	3.09	3.06	1.39	0.51	1.07	2.89	7.23	12.75	0.8	1.03	1.56
		1522	XP_045830180.1_chalcone synthase 1B [Trifolium pratense]	AT5G13930.1_Chalcone and stilbene synthase family protein, GeneName=TT4	IPR016039_Thiolase-like; IPR001099_Chalcone/stilbene synthase, N-terminal; IPR011141_Polyketide synthase, type III; IPR012328_Chalcone/stilbene synthase, C-terminal	CHS	Am_HQ_72269 (CHS)	d	43.2467	64.4833	29.7333	16.2267	20.08	47.96	61.7	50.59	49.98	92.88	23.28	30.71	35.21	11.92	15.36	21.4
		1503	ADZ45299.1_chalcone synthase 1 [Astragalus membranaceus]	AT5G13930.1_Chalcone and stilbene synthase family protein, GeneName=TT4	IPR001099_Chalcone/stilbene synthase, N-terminal; IPR016039_Thiolase-like; IPR012328_Chalcone/stilbene synthase, C-terminal; IPR011141_Polyketide synthase, type III	CHS	Am_HQ_73797 (CHS)	a	443.283	57.3267	273.873	109.66	350.22	498.74	480.89	29.48	65.71	76.79	236.57	244.37	340.68	94.93	109.28	124.77
		1478	AFD36435.1_chalcone synthase 1 [Astragalus membranaceus]	AT5G13930.1_Chalcone and stilbene synthase family protein, GeneName=TT4	IPR001099_Chalcone/stilbene synthase, N-terminal; IPR016039_Thiolase-like; IPR011141_Polyketide synthase, type III; IPR012328_Chalcone/stilbene synthase, C-terminal	CHS	Am_HQ_74424 (CHS)	a	116.113	46.7767	46.26	51.52	91.3	161.89	95.15	37.8	35.09	67.44	39.95	32.91	65.92	52.9	35.74	65.92
		1454	QIM59642.1_chalcone synthase [Astragalus mongholicus]	AT5G13930.1_Chalcone and stilbene synthase family protein, GeneName=TT4	IPR016039_Thiolase-like; IPR011141_Polyketide synthase, type III; IPR001099_Chalcone/stilbene synthase, N-terminal; IPR012328_Chalcone/stilbene synthase, C-terminal	CHS	Am_HQ_74751 (CHS)	b	120.78	92.5333	157.637	58.01	127.26	154.01	81.07	56.87	87.45	133.28	110.94	146.23	215.74	47.88	54.97	71.18
		1458	ATY39972.1_Chalcone synthase [Astragalus membranaceus]	AT5G13930.1_Chalcone and stilbene synthase family protein, GeneName=TT4	IPR016039_Thiolase-like; IPR011141_Polyketide synthase, type III; IPR012328_Chalcone/stilbene synthase, C-terminal; IPR001099_Chalcone/stilbene synthase, N-terminal	CHS	Am_HQ_76172 (CHS)	a	638.613	219.247	280.193	128.653	730.07	684.46	501.31	231.47	139.93	286.34	184.96	289.55	366.07	110.55	157.72	117.69
		1409	ADZ45297.1_chalcone synthase 2 [Astragalus membranaceus]	AT5G13930.1_Chalcone and stilbene synthase family protein, GeneName=TT4	IPR001099_Chalcone/stilbene synthase, N-terminal; IPR016039_Thiolase-like; IPR011141_Polyketide synthase, type III; IPR012328_Chalcone/stilbene synthase, C-terminal	CHS	Am_HQ_76757 (CHS)	a	1380.71	18.5167	143.26	58.73	1402.15	1933.13	806.85	12.27	17.71	25.57	142.54	107.22	180.02	50.49	59.44	66.26
		1383	AID51449.1_chalcone synthase 2 [Astragalus membranaceus]	AT5G13930.1_Chalcone and stilbene synthase family protein, GeneName=TT4	IPR001099_Chalcone/stilbene synthase, N-terminal; IPR011141_Polyketide synthase, type III; IPR012328_Chalcone/stilbene synthase, C-terminal; IPR016039_Thiolase-like	CHS	Am_HQ_78631 (CHS)	a	207.07	2.35	1.77333	4.70333	400.23	160.9	60.08	4.35	2.46	0.24	3.42	1.03	0.87	10.05	2.09	1.97
rnaSPAdes	19	3392	ADZ45297.1_chalcone synthase 2 [Astragalus membranaceus]	AT5G13930.1_Chalcone and stilbene synthase family protein, GeneName=TT4	IPR001099_Chalcone/stilbene synthase, N-terminal; IPR016039_Thiolase-like; IPR012328_Chalcone/stilbene synthase, C-terminal	CHS	Am_Rn_019665 (CHS)	a	165.63	13.8333	36.1433	23.3267	170.45	227.98	98.46	11	15.09	15.41	35.57	35.35	37.51	26.29	24.28	19.41
		2131	ADZ45299.1_chalcone synthase 1 [Astragalus membranaceus]	AT5G13930.1_Chalcone and stilbene synthase family protein, GeneName=TT4	IPR012328_Chalcone/stilbene synthase, C-terminal; IPR016039_Thiolase-like; IPR001099_Chalcone/stilbene synthase, N-terminal	CHS	Am_Rn_046220 (CHS)	b	3.09	0.87	5.9	0.983333	4.64	2.45	2.18	1.23	0.44	0.94	1.93	5.84	9.93	0.69	0.9	1.36
		1877	ADZ45299.1_chalcone synthase 1 [Astragalus membranaceus]	AT5G13930.1_Chalcone and stilbene synthase family protein, GeneName=TT4	IPR016039_Thiolase-like; IPR001099_Chalcone/stilbene synthase, N-terminal; IPR012328_Chalcone/stilbene synthase, C-terminal; IPR011141_Polyketide synthase, type III	CHS	Am_Rn_053989 (CHS)	a	345.997	49.14	205.657	93.9267	289.15	402.53	346.31	26.16	55.12	66.14	155.64	194.01	267.32	80.26	93.49	108.03
		1874	XP_004493096.1_chalcone synthase [Cicer arietinum]	AT5G13930.1_Chalcone and stilbene synthase family protein, GeneName=TT4	IPR016039_Thiolase-like; IPR001099_Chalcone/stilbene synthase, N-terminal; IPR011141_Polyketide synthase, type III; IPR012328_Chalcone/stilbene synthase, C-terminal	CHS	Am_Rn_054104 (CHS)	b	0	128.343	197.083	7.88333	0	0	0	123.79	147.88	113.36	162.61	199.44	229.2	14.27	2.75	6.63
		1717	AFD36435.1_chalcone synthase 1 [Astragalus membranaceus]	AT5G13930.1_Chalcone and stilbene synthase family protein, GeneName=TT4	IPR001099_Chalcone/stilbene synthase, N-terminal; IPR016039_Thiolase-like; IPR011141_Polyketide synthase, type III; IPR012328_Chalcone/stilbene synthase, C-terminal	CHS	Am_Rn_059338 (CHS)	a	100.687	45.7467	39.4567	50.6033	84.45	142.48	75.13	37.88	32.54	66.82	29.46	30.73	58.18	50.54	35.89	65.38
		1505	AEF14414.1_chalcone synthase [Onobrychis viciifolia]	AT5G13930.1_Chalcone and stilbene synthase family protein, GeneName=TT4	IPR011141_Polyketide synthase, type III; IPR001099_Chalcone/stilbene synthase, N-terminal; IPR016039_Thiolase-like; IPR012328_Chalcone/stilbene synthase, C-terminal	CHS	Am_Rn_067016 (CHS)	d	41.7767	69.95	28.76	17.6133	20.38	48.12	56.83	56.37	53.05	100.43	19.76	31.07	35.45	12.5	16.86	23.48
		1164	ABL14037.1_chalcone synthase 3, partial [Astragalus mongholicus]	AT5G13930.1_Chalcone and stilbene synthase family protein, GeneName=TT4	IPR001099_Chalcone/stilbene synthase, N-terminal; IPR016039_Thiolase-like	CHS	Am_Rn_081336 (CHS)	b	5.39333	1.57667	7.81667	1.58667	12.91	1.48	1.79	2.18	1.02	1.53	1.14	8.66	13.65	1.36	1.41	1.99
		1127	PNX99106.1_chalcone synthase, partial [Trifolium pratense]	AT5G13930.1_Chalcone and stilbene synthase family protein, GeneName=TT4	.	CHS	Am_Rn_083078 (CHS)	a	7.67	0.883333	2.38667	2.07667	8.5	11.28	3.23	0.87	0.7	1.08	2.52	2.88	1.76	2.25	3.09	0.89
		1108	AAZ73731.1_chalcone synthase, partial [Astragalus mongholicus] CAJ20138.1 chalcone synthase, partial [Astragalus mongholicus]	AT5G13930.1_Chalcone and stilbene synthase family protein, GeneName=TT4	IPR012328_Chalcone/stilbene synthase, C-terminal; IPR001099_Chalcone/stilbene synthase, N-terminal; IPR016039_Thiolase-like	CHS	Am_Rn_083972 (CHS)	a	552.73	0	30.1533	9.35667	599.41	782.64	276.14	0	0	0	26.3	16.27	47.89	1.61	10.4	16.06
		1098	ATY39972.1_Chalcone synthase [Astragalus membranaceus]	AT5G13930.1_Chalcone and stilbene synthase family protein, GeneName=TT4	IPR016039_Thiolase-like; IPR012328_Chalcone/stilbene synthase, C-terminal; IPR001099_Chalcone/stilbene synthase, N-terminal	CHS	Am_Rn_084476 (CHS)	a	570.4	220.803	266.037	134.197	688.64	605.96	416.6	232.57	141.31	288.53	174.16	279.61	344.34	113.12	173.39	116.08
		1069	ABL14037.1_chalcone synthase 3, partial [Astragalus mongholicus]	AT5G13930.1_Chalcone and stilbene synthase family protein, GeneName=TT4	IPR016039_Thiolase-like; IPR001099_Chalcone/stilbene synthase, N-terminal	CHS	Am_Rn_085936 (CHS)	b	1.64667	1.17	5.44	0.876667	1.98	1.39	1.57	1.68	0.9	0.93	1.75	6.69	7.88	0.57	0.93	1.13
		1010	ABL14037.1_chalcone synthase 3, partial [Astragalus mongholicus]	AT5G13930.1_Chalcone and stilbene synthase family protein, GeneName=TT4	IPR001099_Chalcone/stilbene synthase, N-terminal; IPR016039_Thiolase-like	CHS	Am_Rn_089014 (CHS)	a	10.33	0.223333	4.38667	0.44	18.16	7.84	4.99	0	0	0.67	0.63	3.86	8.67	1.05	0.27	0
		956	QIM59642.1_chalcone synthase [Astragalus mongholicus]	AT5G13930.1_Chalcone and stilbene synthase family protein, GeneName=TT4	IPR016039_Thiolase-like; IPR012328_Chalcone/stilbene synthase, C-terminal; IPR001099_Chalcone/stilbene synthase, N-terminal	CHS	Am_Rn_091935 (CHS)	b	107.297	85.7367	138.753	59.9667	125.55	133.91	62.43	48.77	82.96	125.48	106.79	132.14	177.33	52.94	57.61	69.35
		950	AID51449.1_chalcone synthase 2 [Astragalus membranaceus]	AT5G13930.1_Chalcone and stilbene synthase family protein, GeneName=TT4	IPR001099_Chalcone/stilbene synthase, N-terminal; IPR016039_Thiolase-like; IPR012328_Chalcone/stilbene synthase, C-terminal	CHS	Am_Rn_092292 (CHS)	a	178.87	1.9	1.37	4.70333	347.56	130.65	58.4	3.66	1.73	0.31	2.43	1.21	0.47	9.21	2.26	2.64
		914	ATY39972.1_Chalcone synthase [Astragalus membranaceus]	AT5G13930.1_Chalcone and stilbene synthase family protein, GeneName=TT4	IPR001099_Chalcone/stilbene synthase, N-terminal; IPR016039_Thiolase-like	CHS	Am_Rn_094293 (CHS)	a	419.703	176.863	179.777	97.4633	476.33	482.75	300.03	186.45	109.47	234.67	70.23	210.76	258.34	81.79	114.27	96.33
		844	AID51449.1_chalcone synthase 2 [Astragalus membranaceus]	AT5G13930.1_Chalcone and stilbene synthase family protein, GeneName=TT4	IPR016039_Thiolase-like; IPR001099_Chalcone/stilbene synthase, N-terminal	CHS	Am_Rn_098524 (CHS)	a	137.107	2.75667	3.81	4.96667	264.78	146.54	0	4.53	3.74	0	2.98	4.3	4.15	11.08	3.82	0
		842	AID51449.1_chalcone synthase 2 [Astragalus membranaceus]	AT5G13930.1_Chalcone and stilbene synthase family protein, GeneName=TT4	IPR001099_Chalcone/stilbene synthase, N-terminal; IPR016039_Thiolase-like	CHS	Am_Rn_098643 (CHS)	b	112.743	110.107	151.16	59.86	110.89	154.38	72.96	70.27	100.88	159.17	64.4	151.95	237.13	43.47	57.97	78.14
		816	QHX39740.1_chalcone synthase, partial [Cajanus cajan]	AT5G13930.1_Chalcone and stilbene synthase family protein, GeneName=TT4	IPR016039_Thiolase-like; IPR001099_Chalcone/stilbene synthase, N-terminal	CHS	Am_Rn_100350 (CHS)	a	82.8067	0.7	0.443333	1.84667	158.66	27.8	61.96	0.99	0	1.11	0.93	0	0.4	1.75	0	3.79
		756	ADZ45297.1_chalcone synthase 2 [Astragalus membranaceus]	AT5G13930.1_Chalcone and stilbene synthase family protein, GeneName=TT4	IPR001099_Chalcone/stilbene synthase, N-terminal; IPR016039_Thiolase-like	CHS	Am_Rn_104546 (CHS)	a	1197.74	18.07	120.183	59.3733	1205.69	1767.32	620.22	11.56	16.7	25.95	80.6	105.88	174.07	46.26	56.66	75.2
Trinity	20	1874	XP_004493096.1_chalcone synthase [Cicer arietinum]	AT5G13930.1_Chalcone and stilbene synthase family protein, GeneName=TT4	IPR016039_Thiolase-like; IPR001099_Chalcone/stilbene synthase, N-terminal; IPR011141_Polyketide synthase, type III; IPR012328_Chalcone/stilbene synthase, C-terminal	CHS	Am_Tr_059637 (CHS)	b	0	98.97	151.133	6.01	0	0	0	95.38	113.29	88.24	128.16	151.29	173.95	10.94	2.07	5.02
		1718	ATY39972.1_Chalcone synthase [Astragalus membranaceus]	AT5G13930.1_Chalcone and stilbene synthase family protein, GeneName=TT4	IPR001099_Chalcone/stilbene synthase, N-terminal; IPR016039_Thiolase-like; IPR011141_Polyketide synthase, type III; IPR012328_Chalcone/stilbene synthase, C-terminal	CHS	Am_Tr_030719 (CHS)	a	283.503	28.14	110.757	50.9067	252.33	357.22	240.96	10.92	33.65	39.85	72.68	104.18	155.41	43.02	49.51	60.19
		1693	ATY39972.1_Chalcone synthase [Astragalus membranaceus]	AT5G13930.1_Chalcone and stilbene synthase family protein, GeneName=TT4	IPR016039_Thiolase-like; IPR012328_Chalcone/stilbene synthase, C-terminal; IPR001099_Chalcone/stilbene synthase, N-terminal; IPR011141_Polyketide synthase, type III	CHS	Am_Tr_030716 (CHS)	a	552.72	89.1533	168.013	88.9033	553.52	677.54	427.1	77.24	70.63	119.59	131.76	153.31	218.97	78.37	90.7	97.64
		1669	QIM59642.1_chalcone synthase [Astragalus mongholicus]	AT5G13930.1_Chalcone and stilbene synthase family protein, GeneName=TT4	IPR012328_Chalcone/stilbene synthase, C-terminal; IPR016039_Thiolase-like; IPR001099_Chalcone/stilbene synthase, N-terminal; IPR011141_Polyketide synthase, type III	CHS	Am_Tr_030718 (CHS)	a	175.34	3.65667	13.98	7.97	206.05	240.19	79.78	3	3.76	4.21	10.48	11.14	20.32	7.7	6.34	9.87
		1632	XP_045830180.1_chalcone synthase 1B [Trifolium pratense]	AT5G13930.1_Chalcone and stilbene synthase family protein, GeneName=TT4	IPR016039_Thiolase-like; IPR001099_Chalcone/stilbene synthase, N-terminal; IPR011141_Polyketide synthase, type III; IPR012328_Chalcone/stilbene synthase, C-terminal	CHS	Am_Tr_034095 (CHS)	d	36.2333	53.85	21.51	13.1833	17.02	41.19	50.49	42.12	40.57	78.86	14.74	23.51	26.28	9.61	12.52	17.42
		1535	ATY39972.1_Chalcone synthase [Astragalus membranaceus]	AT5G13930.1_Chalcone and stilbene synthase family protein, GeneName=TT4	IPR016039_Thiolase-like; IPR011141_Polyketide synthase, type III; IPR012328_Chalcone/stilbene synthase, C-terminal; IPR001099_Chalcone/stilbene synthase, N-terminal	CHS	Am_Tr_030717 (CHS)	a	612.687	138.907	163.43	86.1967	689.87	763.83	384.36	132.38	95.21	189.13	87.05	178.35	224.89	74.66	95.6	88.33
		835	PNX75906.1_chalcone synthase, partial [Trifolium pratense]	AT5G13930.1_Chalcone and stilbene synthase family protein, GeneName=TT4	.	CHS	Am_Tr_074322 (CHS)	a	345.547	6.59667	40.9967	16.9333	372.09	472.32	192.23	6.01	4.98	8.8	47.75	28.07	47.17	14.16	19.03	17.61
		546	PNX75906.1_chalcone synthase, partial [Trifolium pratense]	AT5G13930.1_Chalcone and stilbene synthase family protein, GeneName=TT4	IPR016039_Thiolase-like; IPR012328_Chalcone/stilbene synthase, C-terminal	CHS	Am_Tr_128009 (CHS)	a	98.5433	23.8133	28.79	24.8067	146.96	92.83	55.84	17.02	20.46	33.96	24.83	29.62	31.92	33.45	19.07	21.9
		540	ADZ45297.1_chalcone synthase 2 [Astragalus membranaceus]	AT5G13930.1_Chalcone and stilbene synthase family protein, GeneName=TT4	IPR016039_Thiolase-like; IPR001099_Chalcone/stilbene synthase, N-terminal	CHS	Am_Tr_034100 (CHS)	a	285.277	48.4933	74.26	38.98	309.97	398.62	147.24	25.11	42.3	78.07	34.19	69.36	119.23	33.77	31.2	51.97
		514	ATI97626.1_CHS, partial [Lotus sessilifolius]	AT5G13930.1_Chalcone and stilbene synthase family protein, GeneName=TT4	.	CHS	Am_Tr_034102 (CHS)	a	16.7667	2.62667	13.03	3.75667	14.49	19.87	15.94	1.56	3.24	3.08	6.14	11.53	21.42	3.2	3.27	4.8
		510	AAZ32905.1_chalcone synthase, partial [Medicago sativa]	AT5G13930.1_Chalcone and stilbene synthase family protein, GeneName=TT4	IPR016039_Thiolase-like; IPR012328_Chalcone/stilbene synthase, C-terminal; IPR001099_Chalcone/stilbene synthase, N-terminal	CHS	Am_Tr_049514 (CHS)	a	350.843	123.073	141.107	69.1067	405.96	378.28	268.29	131.67	69.73	167.82	85.19	158.95	179.18	51.51	89.33	66.48
		490	P51079.1_RecName: Full=Chalcone synthase 6-4; AltName: Full=Naringenin-chalcone synthase 6-4 [Medicago sativa] AAB41558.1 chalcone synthase, partial [Medicago sativa]	AT5G13930.1_Chalcone and stilbene synthase family protein, GeneName=TT4	IPR016039_Thiolase-like; IPR001099_Chalcone/stilbene synthase, N-terminal; IPR012328_Chalcone/stilbene synthase, C-terminal	CHS	Am_Tr_054114 (CHS)	a	945.267	39.91	132.513	71.43	941.16	1299.12	595.52	29.16	33.57	57	116.08	111.55	169.91	70.73	62.95	80.61
		480	PNX59440.1_chalcone synthase, partial [Trifolium pratense]	AT5G13930.1_Chalcone and stilbene synthase family protein, GeneName=TT4	.	CHS	Am_Tr_054115 (CHS)	a	102.79	9.65	6.78667	9.82	197.82	73.3	37.25	9.81	7.28	11.86	8.25	3.57	8.54	10.81	8.15	10.5
		412	PNX69487.1_chalcone synthase [Trifolium pratense]	AT5G13930.1_Chalcone and stilbene synthase family protein, GeneName=TT4	.	CHS	Am_Tr_074548 (CHS)	a	61.8	10.6233	14.7633	13.1	77.82	74.57	33.01	9.98	6.62	15.27	24.73	5.07	14.49	17.88	7.43	13.99
		327	AAZ73731.1_chalcone synthase, partial [Astragalus mongholicus] CAJ20138.1 chalcone synthase, partial [Astragalus mongholicus]	AT5G13930.1_Chalcone and stilbene synthase family protein, GeneName=TT4	IPR001099_Chalcone/stilbene synthase, N-terminal; IPR016039_Thiolase-like	CHS	Am_Tr_034096 (CHS)	b	87.9367	78.1033	96.2933	39.1967	74.64	138.8	50.37	52.81	72.01	109.49	49.57	99.74	139.57	20.7	41.7	55.19
		325	PNX63947.1_chalcone synthase, partial [Trifolium pratense]	AT5G13930.1_Chalcone and stilbene synthase family protein, GeneName=TT4	.	CHS	Am_Tr_034099 (CHS)	a	135.093	14.57	23.6067	8.03	260.32	98.59	46.37	11.38	15.38	16.95	21.34	16.11	33.37	6.36	10.91	6.82
		285	ACO83024.1_chalcone synthase, partial [Trifolium subterraneum]	AT5G13930.1_Chalcone and stilbene synthase family protein, GeneName=TT4	.	CHS	Am_Tr_190871 (CHS)	a	10.03	2.44	1.58	2.09667	7.82	10.51	11.76	2.51	1.5	3.31	0	2.42	2.32	2.49	2.56	1.24
		275	AAZ32891.1_naringenin-chalcone synthase, partial [Medicago sativa]	AT5G13930.1_Chalcone and stilbene synthase family protein, GeneName=TT4	.	CHS	Am_Tr_148151 (CHS)	a	6.18333	0	1.19333	0.466667	18.55	0	0	0	0	0	3.58	0	0	1.4	0	0
		232	ATI97626.1_CHS, partial [Lotus sessilifolius]	AT5G13930.1_Chalcone and stilbene synthase family protein, GeneName=TT4	.	CHS	Am_Tr_109385 (CHS)	c	15.62	0.98	2.43667	6.58333	46.86	0	0	2.94	0	0	7.31	0	0	19.75	0	0
		232	ATI97626.1_CHS, partial [Lotus sessilifolius]	AT5G13930.1_Chalcone and stilbene synthase family protein, GeneName=TT4	.	CHS	Am_Tr_129504 (CHS)	a	204.91	155.473	165.44	77.73	206.23	262.19	146.31	88.27	149.4	228.75	70.69	170.3	255.33	59.26	73.48	100.45
Iso-seq	9	2396	CAA11226.1_chalcone reductase [Sesbania rostrata]	AT1G59950.1_NAD(P)-linked oxidoreductase superfamily protein	IPR036812_NADP-dependent oxidoreductase domain superfamily; IPR023210_NADP-dependent oxidoreductase domain; IPR020471_Aldo-keto reductase	CHR	Am_HQ_33325 (CHR)	d	0	9.13	1.61667	5.76333	0	0	0	9.01	9.03	9.35	1.19	2.06	1.6	3.72	9.41	4.16
		1944	CAA11226.1_chalcone reductase [Sesbania rostrata]	AT1G59960.1_NAD(P)-linked oxidoreductase superfamily protein	IPR036812_NADP-dependent oxidoreductase domain superfamily; IPR023210_NADP-dependent oxidoreductase domain; IPR020471_Aldo-keto reductase	CHR	Am_HQ_53662 (CHR)	d	0.0766667	7.52667	0.99	5.7	0	0.23	0	7.28	8.45	6.85	1.76	0.35	0.86	3.03	6.98	7.09
		1539	ATY39973.1_Chalcone reductase [Astragalus membranaceus]	AT1G59960.1_NAD(P)-linked oxidoreductase superfamily protein	IPR036812_NADP-dependent oxidoreductase domain superfamily; IPR020471_Aldo-keto reductase; IPR023210_NADP-dependent oxidoreductase domain	CHR	Am_HQ_72927 (CHR)	a	918.097	63.32	60.7733	111.9	1834.7	676.33	243.26	50.94	69.95	69.07	87.25	30.92	64.15	174.26	75.82	85.62
		1439	AFC01214.1_chalcone reductase 1 [Astragalus membranaceus]	AT1G59960.1_NAD(P)-linked oxidoreductase superfamily protein	IPR023210_NADP-dependent oxidoreductase domain; IPR036812_NADP-dependent oxidoreductase domain superfamily	CHR	Am_HQ_76090 (CHR)	a	11.5067	6.71	8.52333	4.99333	14.39	12.83	7.3	1.26	8.42	10.45	4.23	11.86	9.48	2	6.45	6.53
		1373	CAA11226.1_chalcone reductase [Sesbania rostrata]	AT1G59960.1_NAD(P)-linked oxidoreductase superfamily protein	IPR036812_NADP-dependent oxidoreductase domain superfamily; IPR020471_Aldo-keto reductase; IPR023210_NADP-dependent oxidoreductase domain	CHR	Am_HQ_78778 (CHR)	d	0.113333	207.133	69.88	187.023	0	0.34	0	219.84	175.04	226.52	70.13	66.55	72.96	192	152.08	216.99
		1345	CAA11226.1_chalcone reductase [Sesbania rostrata]	AT1G59960.1_NAD(P)-linked oxidoreductase superfamily protein	IPR020471_Aldo-keto reductase; IPR036812_NADP-dependent oxidoreductase domain superfamily; IPR023210_NADP-dependent oxidoreductase domain	CHR	Am_HQ_79181 (CHR)	d	0	129.263	27.73	119.587	0	0	0	148.62	125.22	113.95	23.98	25.52	33.69	113.68	94.62	150.46
		1320	AFC01214.1_chalcone reductase 1 [Astragalus membranaceus]	AT1G59960.1_NAD(P)-linked oxidoreductase superfamily protein	IPR036812_NADP-dependent oxidoreductase domain superfamily; IPR020471_Aldo-keto reductase; IPR023210_NADP-dependent oxidoreductase domain	CHR	Am_HQ_80782 (CHR)	b	148.403	194.567	228.957	40.1733	107.89	165.19	172.13	133.61	210.4	239.69	143.72	277.39	265.76	32.51	63.25	24.76
		1306	AFC01214.1_chalcone reductase 1 [Astragalus membranaceus]	AT1G59960.1_NAD(P)-linked oxidoreductase superfamily protein	IPR023210_NADP-dependent oxidoreductase domain; IPR020471_Aldo-keto reductase; IPR036812_NADP-dependent oxidoreductase domain superfamily	CHR	Am_HQ_81285 (CHR)	a	29.3567	26.9933	21.36	8.21	21.2	48.48	18.39	10.8	33.53	36.65	6.92	23.98	33.18	4.24	13.49	6.9
		1277	AFC01214.1_chalcone reductase 1 [Astragalus membranaceus]	AT1G59960.1_NAD(P)-linked oxidoreductase superfamily protein	IPR036812_NADP-dependent oxidoreductase domain superfamily; IPR020471_Aldo-keto reductase; IPR023210_NADP-dependent oxidoreductase domain	CHR	Am_HQ_81515 (CHR)	a	371.313	32.9867	28.6867	72.21	9.56	782.69	321.69	0.23	52.25	46.48	0.44	24.77	60.85	2.43	106.75	107.45
rnaSPAdes	7	2002	AFC01214.1_chalcone reductase 1 [Astragalus membranaceus]	AT1G59960.1_NAD(P)-linked oxidoreductase superfamily protein	IPR023210_NADP-dependent oxidoreductase domain; IPR036812_NADP-dependent oxidoreductase domain superfamily	CHR	Am_Rn_050064 (CHR)	a	15.0767	3	2.56	4.81667	8.98	26.64	9.61	0	3.55	5.45	0.66	2.73	4.29	1.76	6.71	5.98
		1957	AFC01214.1_chalcone reductase 1 [Astragalus membranaceus]	AT1G59960.1_NAD(P)-linked oxidoreductase superfamily protein	IPR023210_NADP-dependent oxidoreductase domain; IPR036812_NADP-dependent oxidoreductase domain superfamily	CHR	Am_Rn_051480 (CHR)	b	7.78	23.9967	24.59	3.15	9.05	7.08	7.21	11.87	28.93	31.19	12.17	34.01	27.59	2.45	5.62	1.38
		1830	ATY39973.1_Chalcone reductase [Astragalus membranaceus]	AT1G59960.1_NAD(P)-linked oxidoreductase superfamily protein	IPR020471_Aldo-keto reductase; IPR036812_NADP-dependent oxidoreductase domain superfamily; IPR023210_NADP-dependent oxidoreductase domain	CHR	Am_Rn_055530 (CHR)	a	48.0567	43.3133	39.9567	13.9767	69.19	40.38	34.6	33.91	47.14	48.89	25.87	44.4	49.6	14.41	19.06	8.46
		1706	ATY39973.1_Chalcone reductase [Astragalus membranaceus]	AT1G59960.1_NAD(P)-linked oxidoreductase superfamily protein	IPR036812_NADP-dependent oxidoreductase domain superfamily; IPR020471_Aldo-keto reductase; IPR023210_NADP-dependent oxidoreductase domain	CHR	Am_Rn_059711 (CHR)	a	948.877	55.8833	44.79	125.617	1650.63	912.27	283.73	35.72	68.31	63.62	48.88	26.57	58.92	149.14	108.02	119.69
		1661	AFC01214.1_chalcone reductase 1 [Astragalus membranaceus]	AT1G59960.1_NAD(P)-linked oxidoreductase superfamily protein	IPR020471_Aldo-keto reductase; IPR036812_NADP-dependent oxidoreductase domain superfamily; IPR023210_NADP-dependent oxidoreductase domain	CHR	Am_Rn_061346 (CHR)	a	162.503	117.26	116.093	45.1	47.72	286.65	153.14	67.5	132	152.28	54.52	142.28	151.48	17.83	70.59	46.88
		1597	CAA11226.1_chalcone reductase [Sesbania rostrata]	AT1G59960.1_NAD(P)-linked oxidoreductase superfamily protein	IPR020471_Aldo-keto reductase; IPR023210_NADP-dependent oxidoreductase domain; IPR036812_NADP-dependent oxidoreductase domain superfamily	CHR	Am_Rn_063625 (CHR)	d	0.0366667	263.273	51.5433	218.613	0	0.11	0	289.49	218.26	282.07	54.16	47.28	53.19	228.55	157.82	269.47
		963	AFC01214.1_chalcone reductase 1 [Astragalus membranaceus]	AT1G59950.1_NAD(P)-linked oxidoreductase superfamily protein	IPR023210_NADP-dependent oxidoreductase domain; IPR036812_NADP-dependent oxidoreductase domain superfamily	CHR	Am_Rn_091563 (CHR)	c	7.53667	2.78	3.03	4.43333	5.97	13.43	3.21	1.2	3.36	3.78	6.61	0.68	1.8	7.15	2.95	3.2
Trinity	7	2274	CAA11226.1_chalcone reductase [Sesbania rostrata]	AT1G59960.1_NAD(P)-linked oxidoreductase superfamily protein	IPR036812_NADP-dependent oxidoreductase domain superfamily; IPR020471_Aldo-keto reductase; IPR023210_NADP-dependent oxidoreductase domain	CHR	Am_Tr_054889 (CHR)	b	0.116667	0.546667	3.55667	6.62333	0	0.35	0	0.21	1.31	0.12	1.29	5.2	4.18	4.83	5.23	9.81
		2106	CAA11226.1_chalcone reductase [Sesbania rostrata]	AT1G59950.1_NAD(P)-linked oxidoreductase superfamily protein	IPR020471_Aldo-keto reductase; IPR036812_NADP-dependent oxidoreductase domain superfamily; IPR023210_NADP-dependent oxidoreductase domain	CHR	Am_Tr_054890 (CHR)	d	0	6.02333	0.136667	1.42667	0	0	0	6.27	5.49	6.31	0.35	0.06	0	0.02	2.87	1.39
		1874	CAA11226.1_chalcone reductase [Sesbania rostrata]	AT1G59960.1_NAD(P)-linked oxidoreductase superfamily protein	IPR036812_NADP-dependent oxidoreductase domain superfamily; IPR020471_Aldo-keto reductase; IPR023210_NADP-dependent oxidoreductase domain	CHR	Am_Tr_054893 (CHR)	d	0	53.1933	9.09333	44.9	0	0	0	62.92	43.96	52.7	10.11	6.7	10.47	42.09	28.65	63.96
		1645	CAA11226.1_chalcone reductase [Sesbania rostrata]	AT1G59960.1_NAD(P)-linked oxidoreductase superfamily protein	IPR036812_NADP-dependent oxidoreductase domain superfamily; IPR023210_NADP-dependent oxidoreductase domain; IPR020471_Aldo-keto reductase	CHR	Am_Tr_054883 (CHR)	d	0	184.72	47.7933	162.62	0	0	0	196.73	161.1	196.33	40	49.12	54.26	165.49	136.71	185.66
		1547	ATY39973.1_Chalcone reductase [Astragalus membranaceus]	AT1G59960.1_NAD(P)-linked oxidoreductase superfamily protein	IPR036812_NADP-dependent oxidoreductase domain superfamily; IPR020471_Aldo-keto reductase; IPR023210_NADP-dependent oxidoreductase domain	CHR	Am_Tr_000828 (CHR)	a	616.397	38.16	35.6267	77.22	1148.4	516.54	184.25	25.79	43.41	45.28	50.45	17.72	38.71	114.7	57.33	59.63
		1346	ATY39973.1_Chalcone reductase [Astragalus membranaceus]	AT1G59960.1_NAD(P)-linked oxidoreductase superfamily protein	IPR036812_NADP-dependent oxidoreductase domain superfamily; IPR020471_Aldo-keto reductase; IPR023210_NADP-dependent oxidoreductase domain	CHR	Am_Tr_000827 (CHR)	a	634	229.17	217.35	110.147	616.15	868.3	417.55	143.95	252.97	290.59	108.29	264.12	279.64	63.75	148.73	117.96
		359	AFC01214.1_chalcone reductase 1 [Astragalus membranaceus]	AT1G59950.1_NAD(P)-linked oxidoreductase superfamily protein	.	CHR	Am_Tr_114359 (CHR)	a	8.02333	4.19333	2.60333	2.85667	12.27	8.31	3.49	1.3	6.07	5.21	0.55	3.15	4.11	1.31	2.02	5.24
Iso-seq	3	1223	ATY39974.1_Chalcone isomerase [Astragalus membranaceus]	AT3G55120.1_Chalcone-flavanone isomerase family protein, GeneName=TT5	IPR016087_Chalcone isomerase; IPR036298_Chalcone isomerase superfamily	CHI	Am_HQ_83661 (CHI)	c	270.287	127.317	216.67	518.767	175.03	474.48	161.35	63.9	196.97	121.08	195.74	178.09	276.18	421.68	308.26	826.36
		1128	Q8H0G1.1_RecName: Full=Chalcone--flavanone isomerase 2; Short=Chalcone isomerase 2 [Lotus japonicus] BAC53984.1 putative chalcone isomerase [Lotus japonicus]	AT3G55120.1_Chalcone-flavanone isomerase family protein, GeneName=TT5	IPR036298_Chalcone isomerase superfamily; IPR016087_Chalcone isomerase	CHI	Am_HQ_84333 (CHI)	b	14.47	59.3533	95.2667	87.5133	9.25	28.77	5.39	43.32	72.17	62.57	121.74	78.62	85.44	77.7	74	110.84
		885	XP_013461511.2_probable chalcone--flavonone isomerase 3 [Medicago truncatula] AFK36813.1 unknown [Medicago truncatula]	AT5G05270.1_Chalcone-flavanone isomerase family protein, GeneName=CHIL	IPR016087_Chalcone isomerase; IPR036298_Chalcone isomerase superfamily	CHI	Am_HQ_88756 (CHI)	a	1485.12	253.877	489.573	356.597	2348.51	979.56	1127.29	221.11	281.66	258.86	503.89	430.75	534.08	345.43	379.33	345.03
rnaSPAdes	4	3403	ATY39974.1_Chalcone isomerase [Astragalus membranaceus]	AT3G55120.1_Chalcone-flavanone isomerase family protein, GeneName=TT5	IPR036298_Chalcone isomerase superfamily; IPR016087_Chalcone isomerase	CHI	Am_Rn_019487 (CHI)	c	89.94	66.3367	95.5767	218.013	59.74	161.84	48.24	38.34	94.39	66.28	83.31	85.34	118.08	175.56	138.41	340.07
		1148	XP_013461511.2_probable chalcone--flavonone isomerase 3 [Medicago truncatula] AFK36813.1 unknown [Medicago truncatula]	AT5G05270.1_Chalcone-flavanone isomerase family protein, GeneName=CHIL	IPR016087_Chalcone isomerase; IPR036298_Chalcone isomerase superfamily	CHI	Am_Rn_082064 (CHI)	a	337.35	84.1667	126.167	106.61	543.4	251.72	216.93	75.54	89.03	87.93	100.38	124.67	153.45	90.37	132.27	97.19
		1082	XP_013461511.2_probable chalcone--flavonone isomerase 3 [Medicago truncatula] AFK36813.1 unknown [Medicago truncatula]	AT5G05270.1_Chalcone-flavanone isomerase family protein, GeneName=CHIL	IPR016087_Chalcone isomerase; IPR036298_Chalcone isomerase superfamily	CHI	Am_Rn_085271 (CHI)	a	790.04	136.393	233.22	198.42	1309.19	503.85	557.08	112.7	153.57	142.91	202.89	229.1	267.67	193.65	200.39	201.22
		1043	PNY14782.1_chalcone-flavonone isomerase 2-like protein [Trifolium pratense]	AT1G53520.1_Chalcone-flavanone isomerase family protein, GeneName=FAP3	IPR036298_Chalcone isomerase superfamily; IPR016087_Chalcone isomerase	CHI	Am_Rn_087296 (CHI)	d	0.0433333	10.15	4.31667	3.66667	0.13	0	0	24.21	4.32	1.92	9.58	1.31	2.06	10.32	0.16	0.52
Trinity	6	3858	ATY39974.1_Chalcone isomerase [Astragalus membranaceus]	AT3G55120.1_Chalcone-flavanone isomerase family protein, GeneName=TT5	IPR016087_Chalcone isomerase; IPR036298_Chalcone isomerase superfamily	CHI	Am_Tr_098397 (CHI)	c	70.4633	34.7667	50.05	131.937	47.45	124.15	39.79	17.93	52.25	34.12	41.01	43.89	65.25	106.52	79.83	209.46
		1870	XP_004498865.1_fatty-acid-binding protein 2 [Cicer arietinum]	AT2G26310.1_Chalcone-flavanone isomerase family protein, GeneName=FAP2	IPR016087_Chalcone isomerase; IPR036298_Chalcone isomerase superfamily	CHI	Am_Tr_066445 (CHI)	d	9.55	14.7333	10.1667	15.23	3.08	18.01	7.56	12.44	17.53	14.23	8.45	12.23	9.82	20.25	10.97	14.47
		1483	Q8H0G1.1_RecName: Full=Chalcone--flavanone isomerase 2; Short=Chalcone isomerase 2 [Lotus japonicus] BAC53984.1 putative chalcone isomerase [Lotus japonicus]	AT3G55120.1_Chalcone-flavanone isomerase family protein, GeneName=TT5	IPR036298_Chalcone isomerase superfamily; IPR016087_Chalcone isomerase	CHI	Am_Tr_006024 (CHI)	b	6.33333	32.9167	44.06	42.7333	2.72	13.83	2.45	24.61	38.6	35.54	50.68	40.46	41.04	36.6	37.85	53.75
		1226	XP_045801107.1_fatty-acid-binding protein 3, chloroplastic [Trifolium pratense]	AT1G53520.1_Chalcone-flavanone isomerase family protein, GeneName=FAP3	IPR036298_Chalcone isomerase superfamily; IPR016087_Chalcone isomerase	CHI	Am_Tr_041072 (CHI)	b	0	12.0267	18.5167	4.59333	0	0	0	6.26	14.32	15.5	20.5	17.2	17.85	2.65	2.52	8.61
		1211	XP_013461511.2_probable chalcone--flavonone isomerase 3 [Medicago truncatula] AFK36813.1 unknown [Medicago truncatula]	AT5G05270.1_Chalcone-flavanone isomerase family protein, GeneName=CHIL	IPR016087_Chalcone isomerase; IPR036298_Chalcone isomerase superfamily	CHI	Am_Tr_061094 (CHI)	a	936.317	158.1	259.983	215.32	1492.79	630.71	685.45	138.15	170.57	165.58	236.9	245.68	297.37	205.75	230.25	209.96
		1043	PNY14782.1_chalcone-flavonone isomerase 2-like protein [Trifolium pratense]	AT1G53520.1_Chalcone-flavanone isomerase family protein, GeneName=FAP3	IPR036298_Chalcone isomerase superfamily; IPR016087_Chalcone isomerase	CHI	Am_Tr_041071 (CHI)	d	0	7.10667	2.76333	2.31667	0	0	0	18.62	2.24	0.46	5.87	0.94	1.48	6.95	0	0
Iso-seq	3	2763	AEH68209.1_isoflavone synthase [Astragalus mongholicus] AEQ39024.1 isoflavone synthase [Astragalus membranaceus] AEV91333.1 isolfavone synthase 2 [Astragalus mongholicus]	AT5G06900.1_cytochrome P450, family 93, subfamily D, polypeptide 1, GeneName=CYP93D1	IPR002401_Cytochrome P450, E-class, group I; IPR001128_Cytochrome P450; IPR036396_Cytochrome P450 superfamily	IFS	Am_HQ_21462 (IFS)	a	101.747	90.1333	58.12	46.55	45.88	228.98	30.38	70	100.76	99.64	24.01	54.29	96.06	55.17	45.44	39.04
		2106	AEH68209.1_isoflavone synthase [Astragalus mongholicus] AEQ39024.1 isoflavone synthase [Astragalus membranaceus] AEV91333.1 isolfavone synthase 2 [Astragalus mongholicus]	AT2G45560.1_cytochrome P450, family 76, subfamily C, polypeptide 1, GeneName=CYP76C1	IPR036396_Cytochrome P450 superfamily; IPR001128_Cytochrome P450	IFS	Am_HQ_41791 (IFS)	a	637.51	578.843	412.147	336.973	381.13	1331.12	200.28	438.15	604.03	694.35	272.42	380.41	583.61	393.26	317.37	300.29
		2178	AFC88270.1_isoflavone synthase 1 [Astragalus membranaceus]	AT3G20960.1_cytochrome P450, family 705, subfamily A, polypeptide 33, GeneName=CYP705A33	IPR001128_Cytochrome P450; IPR036396_Cytochrome P450 superfamily	IFS	Am_HQ_42345 (IFS)	a	257.65	230.527	145.58	122.377	135.02	562.4	75.53	182.63	242.05	266.9	56.69	151.7	228.35	127.97	128.86	110.3
rnaSPAdes	4	4247	AEH68209.1_isoflavone synthase [Astragalus mongholicus] AEQ39024.1 isoflavone synthase [Astragalus membranaceus] AEV91333.1 isolfavone synthase 2 [Astragalus mongholicus]	AT2G45560.1_cytochrome P450, family 76, subfamily C, polypeptide 1, GeneName=CYP76C1	IPR036396_Cytochrome P450 superfamily; IPR001128_Cytochrome P450	IFS	Am_Rn_010690 (IFS)	a	103.857	111.697	54.4133	57.5133	82.31	199.72	29.54	65.27	129.53	140.29	33	57.69	72.55	65.9	53.05	53.59
		4020	AEH68209.1_isoflavone synthase [Astragalus mongholicus] AEQ39024.1 isoflavone synthase [Astragalus membranaceus] AEV91333.1 isolfavone synthase 2 [Astragalus mongholicus]	AT5G06900.1_cytochrome P450, family 93, subfamily D, polypeptide 1, GeneName=CYP93D1	IPR001128_Cytochrome P450; IPR036396_Cytochrome P450 superfamily; IPR002401_Cytochrome P450, E-class, group I	IFS	Am_Rn_012564 (IFS)	a	98.5067	82.2233	72.33	59.1167	46.47	222.7	26.35	78.29	62.14	106.24	68.82	53.01	95.16	88.76	51.46	37.13
		3410	AEH68209.1_isoflavone synthase [Astragalus mongholicus] AEQ39024.1 isoflavone synthase [Astragalus membranaceus] AEV91333.1 isolfavone synthase 2 [Astragalus mongholicus]	AT4G31480.1_Coatomer, beta subunit	IPR001128_Cytochrome P450; IPR002401_Cytochrome P450, E-class, group I; IPR036396_Cytochrome P450 superfamily	IFS	Am_Rn_019398 (IFS)	d	129.243	164.77	146.113	177.38	84.76	212.17	90.8	134.89	177.86	181.56	89.32	172.67	176.35	203.13	166.87	162.14
		2631	AEH68209.1_isoflavone synthase [Astragalus mongholicus] AEQ39024.1 isoflavone synthase [Astragalus membranaceus] AEV91333.1 isolfavone synthase 2 [Astragalus mongholicus]	AT2G42250.1_cytochrome P450, family 712, subfamily A, polypeptide 1, GeneName=CYP712A1	IPR036396_Cytochrome P450 superfamily; IPR001128_Cytochrome P450; IPR002401_Cytochrome P450, E-class, group I	IFS	Am_Rn_033321 (IFS)	a	348.303	345.573	152.723	86.4667	162.09	845.37	37.45	270.46	365.71	400.55	1.21	144.88	312.08	53.28	112.64	93.48
Trinity	4	2671	AEH68209.1_isoflavone synthase [Astragalus mongholicus] AEQ39024.1 isoflavone synthase [Astragalus membranaceus] AEV91333.1 isolfavone synthase 2 [Astragalus mongholicus]	AT2G45560.1_cytochrome P450, family 76, subfamily C, polypeptide 1, GeneName=CYP76C1	IPR036396_Cytochrome P450 superfamily; IPR001128_Cytochrome P450	IFS	Am_Tr_109942 (IFS)	a	5.59333	6.31667	3.57667	1.99	10.75	3.06	2.97	3.86	8.41	6.68	4.08	1.94	4.71	2.92	2.01	1.04
		2550	AEH68209.1_isoflavone synthase [Astragalus mongholicus] AEQ39024.1 isoflavone synthase [Astragalus membranaceus] AEV91333.1 isolfavone synthase 2 [Astragalus mongholicus]	AT5G06900.1_cytochrome P450, family 93, subfamily D, polypeptide 1, GeneName=CYP93D1	IPR002401_Cytochrome P450, E-class, group I; IPR001128_Cytochrome P450; IPR036396_Cytochrome P450 superfamily	IFS	Am_Tr_109934 (IFS)	a	755.867	644.02	394.603	200.717	410.33	1635.72	221.55	502.1	644.85	785.11	196.23	396.05	591.53	357.72	174.41	70.02
		2298	AFC88270.1_isoflavone synthase 1 [Astragalus membranaceus]	AT2G45560.1_cytochrome P450, family 76, subfamily C, polypeptide 1, GeneName=CYP76C1	IPR001128_Cytochrome P450; IPR002401_Cytochrome P450, E-class, group I; IPR036396_Cytochrome P450 superfamily	IFS	Am_Tr_109939 (IFS)	c	22.3433	3.09333	3.13333	237.5	15	43.67	8.36	0.09	2.81	6.38	2.52	4.73	2.15	161.78	249.24	301.48
		2284	AEH68209.1_isoflavone synthase [Astragalus mongholicus] AEQ39024.1 isoflavone synthase [Astragalus membranaceus] AEV91333.1 isolfavone synthase 2 [Astragalus mongholicus]	AT5G06900.1_cytochrome P450, family 93, subfamily D, polypeptide 1, GeneName=CYP93D1	IPR001128_Cytochrome P450; IPR036396_Cytochrome P450 superfamily; IPR002401_Cytochrome P450, E-class, group I	IFS	Am_Tr_109935 (IFS)	c	9.02333	36.97	12.04	115.57	6.9	18.84	1.33	23.93	58.28	28.7	0	9.84	26.28	2.96	135.65	208.1
Iso-seq	3	1344	Q5NUF4.1_RecName: Full=2-hydroxyisoflavanone dehydratase; AltName: Full=Carboxylesterase HIDM [Glycyrrhiza echinata] BAD80839.1 2-Hydroxyisoflavanone dehydratase [Glycyrrhiza echinata]	AT3G48690.1_alpha/beta-Hydrolases superfamily protein, GeneName=CXE12	IPR013094_Alpha/beta hydrolase fold-3; IPR029058_Alpha/Beta hydrolase fold	2HID	Am_HQ_79972 (2HID)	a	253.15	44.5667	149.153	67.6	249.88	172.08	337.49	28.24	45.85	59.61	103.48	157.99	185.99	70.56	54.04	78.2
		1232	XP_003610679.2_2-hydroxyisoflavanone dehydratase [Medicago truncatula]	AT1G47480.1_alpha/beta-Hydrolases superfamily protein	IPR013094_Alpha/beta hydrolase fold-3; IPR029058_Alpha/Beta hydrolase fold	2HID	Am_HQ_82955 (2HID)	d	33.09	46.06	23.31	21.98	26.98	42.81	29.48	24.77	51.65	61.76	18.23	23.3	28.4	16.3	22.58	27.06
		1167	XP_004516320.1_2-hydroxyisoflavanone dehydratase-like [Cicer arietinum]	AT1G19190.1_alpha/beta-Hydrolases superfamily protein	IPR013094_Alpha/beta hydrolase fold-3; IPR029058_Alpha/Beta hydrolase fold	2HID	Am_HQ_84997 (2HID)	b	0.716667	4.89667	18.4833	16.75	0.22	1.75	0.18	3.25	8.55	2.89	40.18	8.88	6.39	24.02	6.76	19.47
rnaSPAdes	3	1998	Q5NUF4.1_RecName: Full=2-hydroxyisoflavanone dehydratase; AltName: Full=Carboxylesterase HIDM [Glycyrrhiza echinata] BAD80839.1 2-Hydroxyisoflavanone dehydratase [Glycyrrhiza echinata]	AT3G48690.1_alpha/beta-Hydrolases superfamily protein, GeneName=CXE12	IPR013094_Alpha/beta hydrolase fold-3; IPR029058_Alpha/Beta hydrolase fold	2HID	Am_Rn_050193 (2HID)	a	158.27	32.87	97.25	49.4733	165.13	111.86	197.82	20.9	33.29	44.42	57.34	108.99	125.42	50.71	40.16	57.55
		1368	XP_004516320.1_2-hydroxyisoflavanone dehydratase-like [Cicer arietinum]	AT1G19190.1_alpha/beta-Hydrolases superfamily protein	IPR013094_Alpha/beta hydrolase fold-3; IPR029058_Alpha/Beta hydrolase fold	2HID	Am_Rn_072537 (2HID)	b	0.603333	4.75667	14.5567	16.1733	0.19	1.48	0.14	3.14	8.33	2.8	29.68	8.39	5.6	23.32	6.55	18.65
		1322	XP_003610679.2_2-hydroxyisoflavanone dehydratase [Medicago truncatula]	AT1G47480.1_alpha/beta-Hydrolases superfamily protein	IPR013094_Alpha/beta hydrolase fold-3; IPR029058_Alpha/Beta hydrolase fold	2HID	Am_Rn_074473 (2HID)	d	29.5533	48.0133	21.31	22.5633	25.02	39.13	24.51	26.07	52.06	65.91	13.85	22.97	27.11	16.94	22.94	27.81
Trinity	4	1688	Q5NUF4.1_RecName: Full=2-hydroxyisoflavanone dehydratase; AltName: Full=Carboxylesterase HIDM [Glycyrrhiza echinata] BAD80839.1 2-Hydroxyisoflavanone dehydratase [Glycyrrhiza echinata]	AT3G48690.1_alpha/beta-Hydrolases superfamily protein, GeneName=CXE12	IPR013094_Alpha/beta hydrolase fold-3; IPR029058_Alpha/Beta hydrolase fold	2HID	Am_Tr_080568 (2HID)	b	5.77	1.78333	7.27667	2.02667	4.17	2.64	10.5	1.08	1.63	2.64	4.94	6.37	10.52	1.5	2.3	2.28
		1434	Q5NUF4.1_RecName: Full=2-hydroxyisoflavanone dehydratase; AltName: Full=Carboxylesterase HIDM [Glycyrrhiza echinata] BAD80839.1 2-Hydroxyisoflavanone dehydratase [Glycyrrhiza echinata]	AT3G48690.1_alpha/beta-Hydrolases superfamily protein, GeneName=CXE12	IPR013094_Alpha/beta hydrolase fold-3; IPR029058_Alpha/Beta hydrolase fold	2HID	Am_Tr_080569 (2HID)	a	205.89	35.0233	100.073	52.4133	208	144.86	264.81	22.27	35.41	47.39	60.15	113.28	126.79	54.88	41.45	60.91
		1335	XP_004516320.1_2-hydroxyisoflavanone dehydratase-like [Cicer arietinum]	AT1G19190.1_alpha/beta-Hydrolases superfamily protein	IPR013094_Alpha/beta hydrolase fold-3; IPR029058_Alpha/Beta hydrolase fold	2HID	Am_Tr_113029 (2HID)	b	0.563333	3.53	11.57	12.0433	0.17	1.38	0.14	2.31	6.57	1.71	23.79	6.55	4.37	16.97	5.08	14.08
		1264	XP_003610679.2_2-hydroxyisoflavanone dehydratase [Medicago truncatula]	AT1G47480.1_alpha/beta-Hydrolases superfamily protein	IPR013094_Alpha/beta hydrolase fold-3; IPR029058_Alpha/Beta hydrolase fold	2HID	Am_Tr_109045 (2HID)	d	28.8333	40.0733	17.6767	18.4767	24.12	37.04	25.34	21.72	43.48	55.02	12.13	18.65	22.25	13.54	18.83	23.06
Iso-seq	6	1714	Q84KK6.1_RecName: Full=Isoflavone 4&apos;-O-methyltransferase; Short=GeHI4&apos;OMT; AltName: Full=2,7,4&apos;-trihydroxyisoflavanone 4&apos;-O-methyltransferase; AltName: Full=S-adenosyl-L-methionine:2,7,4&apos;-trihydroxyisoflavanone 4&apos;-O-methyltransferase [Glycyrrhiza echinata] BAC58011.1 S-adenosyl-L-methionine: 2,7,4&apos;-trihydroxyisoflavanone 4&apos;-O-methyltransferase [Glycyrrhiza …	AT4G35160.1_O-methyltransferase family protein	IPR001077_O-methyltransferase domain; IPR036390_Winged helix DNA-binding domain superfamily; IPR016461_O-methyltransferase COMT-type; IPR012967_Plant methyltransferase dimerisation; IPR029063_S-adenosyl-L-methionine-dependent methyltransferase	IOMT	Am_HQ_64799 (IOMT)	a	195.437	104.01	85.4433	99.7433	193.47	302.93	89.91	60.54	125.74	125.75	39.27	86.08	130.98	98.61	95.81	104.81
		1648	ATY39976.1_Isoflavone O-methyltransferase [Astragalus membranaceus]	AT4G35160.1_O-methyltransferase family protein	IPR012967_Plant methyltransferase dimerisation; IPR001077_O-methyltransferase domain; IPR029063_S-adenosyl-L-methionine-dependent methyltransferase; IPR036390_Winged helix DNA-binding domain superfamily	IOMT	Am_HQ_68183 (IOMT)	a	6.49667	6.97333	3.60333	3.11333	11.06	5.54	2.89	3.73	7.99	9.2	1.53	3.65	5.63	2.08	4.63	2.63
		1538	ATY39976.1_Isoflavone O-methyltransferase [Astragalus membranaceus]	AT4G35160.1_O-methyltransferase family protein	IPR036390_Winged helix DNA-binding domain superfamily; IPR001077_O-methyltransferase domain; IPR016461_O-methyltransferase COMT-type; IPR029063_S-adenosyl-L-methionine-dependent methyltransferase; IPR012967_Plant methyltransferase dimerisation	IOMT	Am_HQ_69248 (IOMT)	d	32.7	87.44	49.2933	17.4667	36.88	34.41	26.81	42.72	86.82	132.78	23.17	63.41	61.3	13.11	21.63	17.66
		1300	Q84KK6.1_RecName: Full=Isoflavone 4&apos;-O-methyltransferase; Short=GeHI4&apos;OMT; AltName: Full=2,7,4&apos;-trihydroxyisoflavanone 4&apos;-O-methyltransferase; AltName: Full=S-adenosyl-L-methionine:2,7,4&apos;-trihydroxyisoflavanone 4&apos;-O-methyltransferase [Glycyrrhiza echinata] BAC58011.1 S-adenosyl-L-methionine: 2,7,4&apos;-trihydroxyisoflavanone 4&apos;-O-methyltransferase [Glycyrrhiza …	AT4G35160.1_O-methyltransferase family protein	IPR036390_Winged helix DNA-binding domain superfamily; IPR016461_O-methyltransferase COMT-type; IPR029063_S-adenosyl-L-methionine-dependent methyltransferase; IPR001077_O-methyltransferase domain; IPR012967_Plant methyltransferase dimerisation	IOMT	Am_HQ_81055 (IOMT)	a	16.13	7.64	16.3833	5.10667	5.93	37.7	4.76	6.66	8.82	7.44	17.95	5.06	26.14	6.11	1.12	8.09
		1225	ATY39976.1_Isoflavone O-methyltransferase [Astragalus membranaceus]	AT4G35160.1_O-methyltransferase family protein	IPR012967_Plant methyltransferase dimerisation; IPR016461_O-methyltransferase COMT-type; IPR036390_Winged helix DNA-binding domain superfamily; IPR001077_O-methyltransferase domain; IPR029063_S-adenosyl-L-methionine-dependent methyltransferase	IOMT	Am_HQ_81501 (IOMT)	d	124.5	184.133	76.6233	94.7067	144.96	104.62	123.92	109.07	184.02	259.31	36.85	94.87	98.15	51.42	135.56	97.14
		1197	TKY50287.1_Isoflavone 7-O-methyltransferase [Spatholobus suberectus]	AT4G35160.1_O-methyltransferase family protein	IPR001077_O-methyltransferase domain; IPR029063_S-adenosyl-L-methionine-dependent methyltransferase; IPR036390_Winged helix DNA-binding domain superfamily; IPR016461_O-methyltransferase COMT-type; IPR012967_Plant methyltransferase dimerisation	IOMT	Am_HQ_84308 (IOMT)	b	0.13	8.57	64.1467	0.563333	0	0.21	0.18	2.31	20.97	2.43	76	54.09	62.35	0.34	0.79	0.56
rnaSPAdes	7	2453	ATY39976.1_Isoflavone O-methyltransferase [Astragalus membranaceus]	AT4G35160.1_O-methyltransferase family protein	IPR012967_Plant methyltransferase dimerisation; IPR001077_O-methyltransferase domain; IPR029063_S-adenosyl-L-methionine-dependent methyltransferase; IPR036390_Winged helix DNA-binding domain superfamily	IOMT	Am_Rn_037509 (IOMT)	a	4.70333	5.45333	2.63667	2.68	8.22	3.82	2.07	2.96	5.81	7.59	0.93	2.57	4.41	1.79	3.86	2.39
		2250	AID51450.1_isoflavone O-methyltransferase [Astragalus membranaceus]	AT4G35160.1_O-methyltransferase family protein	IPR029063_S-adenosyl-L-methionine-dependent methyltransferase; IPR001077_O-methyltransferase domain; IPR036390_Winged helix DNA-binding domain superfamily; IPR012967_Plant methyltransferase dimerisation	IOMT	Am_Rn_042799 (IOMT)	a	10.6067	0.276667	0.136667	0.293333	20.2	3.69	7.93	0.51	0.24	0.08	0.05	0.12	0.24	0.56	0	0.32
		2093	Q84KK6.1_RecName: Full=Isoflavone 4&apos;-O-methyltransferase; Short=GeHI4&apos;OMT; AltName: Full=2,7,4&apos;-trihydroxyisoflavanone 4&apos;-O-methyltransferase; AltName: Full=S-adenosyl-L-methionine:2,7,4&apos;-trihydroxyisoflavanone 4&apos;-O-methyltransferase [Glycyrrhiza echinata] BAC58011.1 S-adenosyl-L-methionine: 2,7,4&apos;-trihydroxyisoflavanone 4&apos;-O-methyltransferase [Glycyrrhiza …	AT4G35160.1_O-methyltransferase family protein	IPR001077_O-methyltransferase domain; IPR036390_Winged helix DNA-binding domain superfamily; IPR016461_O-methyltransferase COMT-type; IPR012967_Plant methyltransferase dimerisation; IPR029063_S-adenosyl-L-methionine-dependent methyltransferase	IOMT	Am_Rn_047303 (IOMT)	a	156.09	95.0167	69.8367	90.7767	155.36	246.93	65.98	55.64	112.81	116.6	26.7	73.53	109.28	88.2	88.59	95.54
		2013	Q84KK5.1_RecName: Full=Isoflavone 7-O-methyltransferase; AltName: Full=Daidzein 7-O-methyltransferase [Glycyrrhiza echinata] BAC58012.1 S-adenosyl-L-methionine: daidzein 7-0-methyltransferase [Glycyrrhiza echinata]	AT5G54160.1_O-methyltransferase 1, GeneName=OMT1	IPR029063_S-adenosyl-L-methionine-dependent methyltransferase; IPR036390_Winged helix DNA-binding domain superfamily; IPR001077_O-methyltransferase domain; IPR012967_Plant methyltransferase dimerisation	IOMT	Am_Rn_049748 (IOMT)	d	19.45	63.21	32.2933	13.05	23.27	21.25	13.83	31.36	62.63	95.64	11.99	43.91	40.98	9.45	16.79	12.91
		1984	ATY39976.1_Isoflavone O-methyltransferase [Astragalus membranaceus]	AT4G35160.1_O-methyltransferase family protein	IPR012967_Plant methyltransferase dimerisation; IPR016461_O-methyltransferase COMT-type; IPR036390_Winged helix DNA-binding domain superfamily; IPR001077_O-methyltransferase domain; IPR029063_S-adenosyl-L-methionine-dependent methyltransferase	IOMT	Am_Rn_050644 (IOMT)	d	73.3267	131.727	49.75	64.4933	88.06	64.14	67.78	77.66	127.71	189.81	19.94	64.31	65	34.2	93	66.28
		1582	Q84KK6.1_RecName: Full=Isoflavone 4&apos;-O-methyltransferase; Short=GeHI4&apos;OMT; AltName: Full=2,7,4&apos;-trihydroxyisoflavanone 4&apos;-O-methyltransferase; AltName: Full=S-adenosyl-L-methionine:2,7,4&apos;-trihydroxyisoflavanone 4&apos;-O-methyltransferase [Glycyrrhiza echinata] BAC58011.1 S-adenosyl-L-methionine: 2,7,4&apos;-trihydroxyisoflavanone 4&apos;-O-methyltransferase [Glycyrrhiza …	AT4G35160.1_O-methyltransferase family protein	IPR016461_O-methyltransferase COMT-type; IPR001077_O-methyltransferase domain; IPR036390_Winged helix DNA-binding domain superfamily; IPR012967_Plant methyltransferase dimerisation; IPR029063_S-adenosyl-L-methionine-dependent methyltransferase	IOMT	Am_Rn_064183 (IOMT)	a	12.7333	6.8	12.5033	4.50333	4.91	30	3.29	5.79	7.77	6.84	12.07	4.19	21.25	5.15	1.05	7.31
		1409	TKY50287.1_Isoflavone 7-O-methyltransferase [Spatholobus suberectus]	AT4G35160.1_O-methyltransferase family protein	IPR001077_O-methyltransferase domain; IPR029063_S-adenosyl-L-methionine-dependent methyltransferase; IPR036390_Winged helix DNA-binding domain superfamily; IPR016461_O-methyltransferase COMT-type; IPR012967_Plant methyltransferase dimerisation	IOMT	Am_Rn_070875 (IOMT)	b	0.0466667	8.51333	54.1933	0.533333	0	0	0.14	2.04	21.02	2.48	57.42	50.3	54.86	0.31	0.76	0.53
Trinity	7	2093	Q84KK6.1_RecName: Full=Isoflavone 4&apos;-O-methyltransferase; Short=GeHI4&apos;OMT; AltName: Full=2,7,4&apos;-trihydroxyisoflavanone 4&apos;-O-methyltransferase; AltName: Full=S-adenosyl-L-methionine:2,7,4&apos;-trihydroxyisoflavanone 4&apos;-O-methyltransferase [Glycyrrhiza echinata] BAC58011.1 S-adenosyl-L-methionine: 2,7,4&apos;-trihydroxyisoflavanone 4&apos;-O-methyltransferase [Glycyrrhiza …	AT4G35160.1_O-methyltransferase family protein	IPR001077_O-methyltransferase domain; IPR036390_Winged helix DNA-binding domain superfamily; IPR016461_O-methyltransferase COMT-type; IPR012967_Plant methyltransferase dimerisation; IPR029063_S-adenosyl-L-methionine-dependent methyltransferase	IOMT	Am_Tr_148597 (IOMT)	a	141.143	73.3667	53.2967	68.9567	137.09	223.12	63.22	42.87	86.43	90.8	21.05	55.78	83.06	67.63	66.71	72.53
		2072	ATY39976.1_Isoflavone O-methyltransferase [Astragalus membranaceus]	AT4G35160.1_O-methyltransferase family protein	IPR001077_O-methyltransferase domain; IPR012967_Plant methyltransferase dimerisation; IPR029063_S-adenosyl-L-methionine-dependent methyltransferase; IPR016461_O-methyltransferase COMT-type; IPR036390_Winged helix DNA-binding domain superfamily	IOMT	Am_Tr_020574 (IOMT)	d	17.8	49.9267	24.2733	8.91	19.38	18.69	15.33	21.73	45.32	82.73	8.02	32.86	31.94	4.6	11.39	10.74
		1836	ATY39976.1_Isoflavone O-methyltransferase [Astragalus membranaceus]	AT4G35160.1_O-methyltransferase family protein	IPR012967_Plant methyltransferase dimerisation; IPR016461_O-methyltransferase COMT-type; IPR036390_Winged helix DNA-binding domain superfamily; IPR001077_O-methyltransferase domain; IPR029063_S-adenosyl-L-methionine-dependent methyltransferase	IOMT	Am_Tr_020571 (IOMT)	d	69.8933	102.943	37.67	52.04	81.49	60.23	67.96	61.1	100.53	147.2	16.07	48.17	48.77	27.82	74.87	53.43
		1535	Q84KK6.1_RecName: Full=Isoflavone 4&apos;-O-methyltransferase; Short=GeHI4&apos;OMT; AltName: Full=2,7,4&apos;-trihydroxyisoflavanone 4&apos;-O-methyltransferase; AltName: Full=S-adenosyl-L-methionine:2,7,4&apos;-trihydroxyisoflavanone 4&apos;-O-methyltransferase [Glycyrrhiza echinata] BAC58011.1 S-adenosyl-L-methionine: 2,7,4&apos;-trihydroxyisoflavanone 4&apos;-O-methyltransferase [Glycyrrhiza …	AT4G35160.1_O-methyltransferase family protein	IPR016461_O-methyltransferase COMT-type; IPR001077_O-methyltransferase domain; IPR012967_Plant methyltransferase dimerisation; IPR036390_Winged helix DNA-binding domain superfamily; IPR029063_S-adenosyl-L-methionine-dependent methyltransferase	IOMT	Am_Tr_148594 (IOMT)	a	12.1967	5.47667	10.17	3.50667	4.55	28.58	3.46	4.93	6.01	5.49	10.12	3.25	17.14	4.09	0.68	5.75
		1426	AID51450.1_isoflavone O-methyltransferase [Astragalus membranaceus]	AT4G35160.1_O-methyltransferase family protein	IPR001077_O-methyltransferase domain; IPR036390_Winged helix DNA-binding domain superfamily; IPR029063_S-adenosyl-L-methionine-dependent methyltransferase; IPR012967_Plant methyltransferase dimerisation	IOMT	Am_Tr_118861 (IOMT)	a	11.66	0.33	0.18	0.356667	19.39	5.49	10.1	0.54	0.17	0.28	0.07	0	0.47	0.59	0	0.48
		1311	TKY50287.1_Isoflavone 7-O-methyltransferase [Spatholobus suberectus]	AT4G35160.1_O-methyltransferase family protein	IPR001077_O-methyltransferase domain; IPR029063_S-adenosyl-L-methionine-dependent methyltransferase; IPR036390_Winged helix DNA-binding domain superfamily; IPR016461_O-methyltransferase COMT-type; IPR012967_Plant methyltransferase dimerisation	IOMT	Am_Tr_148267 (IOMT)	b	0.0466667	7.23	45.3167	0.383333	0	0	0.14	1.92	17.55	2.22	48.7	41.57	45.68	0.26	0.63	0.26
		698	ATY39976.1_Isoflavone O-methyltransferase [Astragalus membranaceus]	.	.	IOMT	Am_Tr_241121 (IOMT)	d	5.3	15.51	6.95	3.53333	6.19	6.6	3.11	7.23	12.75	26.55	0.99	7.58	12.28	2.83	5.11	2.66
Iso-seq	2	1364	AEF14415.1_flavanone 3-hydroxylase [Onobrychis viciifolia]	AT3G51240.1_flavanone 3-hydroxylase, GeneName=F3H	IPR044861_Isopenicillin N synthase-like, Fe(2+) 2OG dioxygenase domain; IPR026992_Non-haem dioxygenase N-terminal domain	F3H	Am_HQ_78201 (F3H)	b	0	49.6	229.01	7.28	0	0	0	46.97	70.95	30.88	310.62	198	178.41	9.9	0.77	11.17
		1375	TKY59134.1_Flavanone 3-dioxygenase [Spatholobus suberectus]	AT3G19000.1_2-oxoglutarate (2OG) and Fe(II)-dependent oxygenase superfamily protein	IPR044861_Isopenicillin N synthase-like, Fe(2+) 2OG dioxygenase domain; IPR026992_Non-haem dioxygenase N-terminal domain	F3H	Am_HQ_78913 (F3H)	d	0.476667	16.74	2.72333	2.27333	0.12	0.94	0.37	24.33	21.41	4.48	2.89	3.59	1.69	1.57	4.38	0.87
rnaSPAdes	1	1562	AEF14415.1_flavanone 3-hydroxylase [Onobrychis viciifolia]	AT3G51240.1_flavanone 3-hydroxylase, GeneName=F3H	IPR044861_Isopenicillin N synthase-like, Fe(2+) 2OG dioxygenase domain; IPR026992_Non-haem dioxygenase N-terminal domain	F3H	Am_Rn_064879 (F3H)	b	0	49.2533	191.17	7.16333	0	0	0	46.88	70.05	30.83	229.4	183.36	160.75	9.59	0.87	11.03
Trinity	3	1567	AEF14415.1_flavanone 3-hydroxylase [Onobrychis viciifolia]	AT3G51240.1_flavanone 3-hydroxylase, GeneName=F3H	IPR044861_Isopenicillin N synthase-like, Fe(2+) 2OG dioxygenase domain; IPR026992_Non-haem dioxygenase N-terminal domain	F3H	Am_Tr_110462 (F3H)	b	0	37.64	147.277	5.37333	0	0	0	35.9	53.07	23.95	180.53	139.02	122.28	7.29	0.58	8.25
		1152	TKY59134.1_Flavanone 3-dioxygenase [Spatholobus suberectus]	AT3G19000.2_2-oxoglutarate (2OG) and Fe(II)-dependent oxygenase superfamily protein	IPR026992_Non-haem dioxygenase N-terminal domain; IPR044861_Isopenicillin N synthase-like, Fe(2+) 2OG dioxygenase domain	F3H	Am_Tr_065564 (F3H)	d	0.0433333	5.49	0.333333	0.236667	0	0.13	0	6.96	2.43	7.08	0.25	0	0.75	0.37	0.34	0
		633	TKY59134.1_Flavanone 3-dioxygenase [Spatholobus suberectus]	AT3G19000.1_2-oxoglutarate (2OG) and Fe(II)-dependent oxygenase superfamily protein	IPR044861_Isopenicillin N synthase-like, Fe(2+) 2OG dioxygenase domain	F3H	Am_Tr_030096 (F3H)	d	0.02	12.5	2.09667	0.973333	0	0.02	0.04	19.3	14.63	3.57	2.85	2.11	1.33	0.25	1.29	1.38
Iso-seq	3	1280	TKY73761.1_Flavonol synthase/flavanone 3-hydroxylase [Spatholobus suberectus]	AT5G08640.1_flavonol synthase 1, GeneName=FLS1	IPR026992_Non-haem dioxygenase N-terminal domain	FLS	Am_HQ_82005 (FLS)	b	0	8.92333	18.4767	0.103333	0	0	0	10.63	9.26	6.88	31.21	7.44	16.78	0	0.31	0
		1226	AEF14416.1_flavonol synthase [Onobrychis viciifolia]	AT5G08640.1_flavonol synthase 1, GeneName=FLS1	IPR044861_Isopenicillin N synthase-like, Fe(2+) 2OG dioxygenase domain; IPR026992_Non-haem dioxygenase N-terminal domain	FLS	Am_HQ_83112 (FLS)	b	0.503333	141.187	177.553	12.2567	0	0.21	1.3	123.95	170.45	129.16	240.49	137.3	154.87	15.85	8.23	12.69
		1205	TKY73761.1_Flavonol synthase/flavanone 3-hydroxylase [Spatholobus suberectus]	AT5G08640.1_flavonol synthase 1, GeneName=FLS1	IPR026992_Non-haem dioxygenase N-terminal domain; IPR044861_Isopenicillin N synthase-like, Fe(2+) 2OG dioxygenase domain	FLS	Am_HQ_83674 (FLS)	b	0	95.7133	278.717	2.97667	0	0	0	109	81.8	96.34	330.99	227.75	277.41	1.34	4.71	2.88
rnaSPAdes	4	3892	XP_013466706.1_flavonol synthase/flavanone 3-hydroxylase [Medicago truncatula] KEH40747.1 gibberellin 2-beta-dioxygenase [Medicago truncatula]	AT3G19000.2_2-oxoglutarate (2OG) and Fe(II)-dependent oxygenase superfamily protein	IPR044861_Isopenicillin N synthase-like, Fe(2+) 2OG dioxygenase domain; IPR026992_Non-haem dioxygenase N-terminal domain	FLS	Am_Rn_013725 (FLS)	c	0.126667	0.41	0.203333	27.4767	0.04	0.23	0.11	0.44	0.46	0.33	0.04	0.29	0.28	15.32	36.7	30.41
		2058	TKY73761.1_Flavonol synthase/flavanone 3-hydroxylase [Spatholobus suberectus]	AT5G08640.1_flavonol synthase 1, GeneName=FLS1	IPR026992_Non-haem dioxygenase N-terminal domain	FLS	Am_Rn_048342 (FLS)	b	0	5.54333	9.03	0.0766667	0	0	0	5.91	5.95	4.77	13.24	5.6	8.25	0.11	0.12	0
		1750	AEF14416.1_flavonol synthase [Onobrychis viciifolia]	AT5G08640.1_flavonol synthase 1, GeneName=FLS1	IPR044861_Isopenicillin N synthase-like, Fe(2+) 2OG dioxygenase domain; IPR026992_Non-haem dioxygenase N-terminal domain	FLS	Am_Rn_058219 (FLS)	b	0.3	106.923	114.063	9.43667	0	0.14	0.76	92.09	127.98	100.7	136.4	98.32	107.47	11.99	6.45	9.87
		1545	TKY73761.1_Flavonol synthase/flavanone 3-hydroxylase [Spatholobus suberectus]	AT5G08640.1_flavonol synthase 1, GeneName=FLS1	IPR026992_Non-haem dioxygenase N-terminal domain; IPR044861_Isopenicillin N synthase-like, Fe(2+) 2OG dioxygenase domain	FLS	Am_Rn_065503 (FLS)	b	0	86.1067	213.09	2.6	0	0	0	98.88	73.02	86.42	224.6	187.76	226.91	1.06	4.25	2.49
Trinity	4	1927	TKY73761.1_Flavonol synthase/flavanone 3-hydroxylase [Spatholobus suberectus]	AT5G08640.1_flavonol synthase 1, GeneName=FLS1	IPR026992_Non-haem dioxygenase N-terminal domain	FLS	Am_Tr_032686 (FLS)	b	0	2.86667	5.51333	0.0566667	0	0	0	3.08	1.45	4.07	7.93	0.09	8.52	0	0.17	0
		1771	TKY73761.1_Flavonol synthase/flavanone 3-hydroxylase [Spatholobus suberectus]	AT5G08640.1_flavonol synthase 1, GeneName=FLS1	IPR026992_Non-haem dioxygenase N-terminal domain; IPR044861_Isopenicillin N synthase-like, Fe(2+) 2OG dioxygenase domain	FLS	Am_Tr_032687 (FLS)	b	0	54.49	135.513	1.69	0	0	0	63.03	46.71	53.73	144.9	121.52	140.12	0.69	2.64	1.74
		1708	AEF14416.1_flavonol synthase [Onobrychis viciifolia]	AT5G08640.1_flavonol synthase 1, GeneName=FLS1	IPR044861_Isopenicillin N synthase-like, Fe(2+) 2OG dioxygenase domain; IPR026992_Non-haem dioxygenase N-terminal domain	FLS	Am_Tr_159864 (FLS)	b	0.303333	86.0233	91.4567	7.48	0	0.13	0.78	76.21	101.25	80.61	113	76.85	84.52	9.76	4.99	7.69
rnaSPAdes	1	2787	AEF14420.1_dihydroflavonol 4-reductase [Onobrychis viciifolia]	AT5G42800.1_dihydroflavonol 4-reductase, GeneName=DFR	IPR036291_NAD(P)-binding domain superfamily; IPR001509_NAD-dependent epimerase/dehydratase	DFR	Am_Rn_030015 (DFR)	b	0.53	1.41	5.37333	5.47	0.58	0.76	0.25	0.44	2.54	1.25	4.35	7.18	4.59	5.39	0.12	10.9
Trinity	3	1344	AEF14420.1_dihydroflavonol 4-reductase [Onobrychis viciifolia]	AT5G42800.1_dihydroflavonol 4-reductase, GeneName=DFR	IPR036291_NAD(P)-binding domain superfamily; IPR001509_NAD-dependent epimerase/dehydratase	DFR	Am_Tr_143093 (DFR)	b	0.0566667	0.276667	7.56667	7.30333	0	0.17	0	0	0.83	0	6.69	9.76	6.25	7.11	0	14.8
		607	MCI02260.1_dihydroflavonol-4-reductase [Trifolium medium]	AT5G42800.1_dihydroflavonol 4-reductase, GeneName=DFR	.	DFR	Am_Tr_068814 (DFR)	d	4.65667	4.54	2.48667	5.10667	6.6	2.59	4.78	4.03	6.14	3.45	2.53	2	2.93	7.42	4.74	3.16
		201	XP_041349320.1_putative dihydroflavonol 4-reductase [Gigantopelta aegis]	.	.	DFR	Am_Tr_302384 (DFR)	b	0	0	5.80667	0	0	0	0	0	0	0	17.42	0	0	0	0	0
Iso-seq	1	1374	AEF14411.1_anthocyanidin synthase [Onobrychis viciifolia]	AT4G22880.2_leucoanthocyanidin dioxygenase, GeneName=LDOX	IPR044861_Isopenicillin N synthase-like, Fe(2+) 2OG dioxygenase domain; IPR026992_Non-haem dioxygenase N-terminal domain	ANS	Am_HQ_75882 (ANS)	b	0	0.98	45.46	7.49667	0	0	0	0	2.78	0.16	46.78	38.33	51.27	7.72	1.24	13.53
rnaSPAdes	1	1459	AEF14411.1_anthocyanidin synthase [Onobrychis viciifolia]	AT4G22880.2_leucoanthocyanidin dioxygenase, GeneName=LDOX	IPR044861_Isopenicillin N synthase-like, Fe(2+) 2OG dioxygenase domain; IPR026992_Non-haem dioxygenase N-terminal domain	ANS	Am_Rn_068830 (ANS)	b	0	0.83	39.3633	7.79667	0	0	0	0	2.49	0	32.32	36.86	48.91	7.8	1.12	14.47
Trinity	1	1459	AEF14411.1_anthocyanidin synthase [Onobrychis viciifolia]	AT4G22880.2_leucoanthocyanidin dioxygenase, GeneName=LDOX	IPR044861_Isopenicillin N synthase-like, Fe(2+) 2OG dioxygenase domain; IPR026992_Non-haem dioxygenase N-terminal domain	ANS	Am_Tr_104544 (ANS)	b	0	0.636667	30.1833	5.93	0	0	0	0	1.91	0	25.47	27.96	37.12	5.98	0.85	10.96

## Sheet: Table 11
Supplementary Table 11. Sequence information of 242 selected unigenes (TPM ≥ 5).
Flatform	Unigene number	Unigene ID	Unigene length	Unigene sequence	CDS length	CDS	Average TPM				Roots			Leaves			Flowers			Stems
							Roots	Leaves	Flowers	Stems	R1	R2	R3	L1	L2	L3	F1	F2	F3	S1	S2	S3
Iso-seq	7	Am_HQ_15428 (PAL)-d	2930	GAGAAAATCAATTCTCCACAACTCTCTTTCATAACATTTTCTTTCTCTCCATATTTTTAATTTCTTTCCTTCAATTTTCTCTCTAAAACATTTGTATTAACAAAATGGAAACTGCAACCATTACCAACAACTTTAACGGTGGTTCATTCTGTTTGAAGAATAGTACTATCAATGCTAGTGATCCATTGAATTGGGGTGTGGCTGCGGAGTCAATGAAGGGGAGTCACCTGGATGAGGTGAAGCGGATGGTGGAGGAGTACCGGACACCGGTGGTGAGGCTCGGTGGGGAGACGTTGACAATCTCGCAGGTGGCTGCGATCGCCGGAGCATACGATGATGGTGTGAGGGTGGAGCTGTCGGAATCTGCAAGGGCTGGTGTTAAGGCTAGTAGTGACTGGG…	1674	ATGTTAGTGAGAATCAACACACTTCTCCAAGGCTACTCAGGCATTAGATTTGAAATCTTAGAGGCCATAACCAAGCTTCTCAACAACAATATCACCCCATGTTTACCACTTCGTGGTACAATCACAGCTTCAGGAGATTTGGTCCCTCTTTCTTACATTGCTGGTTTGCTTACTGGTAGACCAAACTCCAAAGCTGTTGGACCCTCTGGAGAGGTACTCAATGCAAAGGAAGCTTTTCAATTAGCCGGAATCAATGATGGTTTCTTTGAATTGCAGCCCAAAGAAGGCCTTGCACTTGTCAATGGCACTGCAGTTGGTTCTGCCTTAGCATCTATCGTTCTCTTTGATGCTAACATATTGGTTGTCTTGTCTGAAGTTCTATCAGCTATATTTGCTGAA…	11.7833	18.2467	10.7267	24.11	16.77	16.39	2.19	31.95	18.98	3.81	13.97	15.3	2.91	40.33	29.28	2.72
		Am_HQ_15739 (PAL)-c	2995	GACCACTCAGAAAATCAATTCACCACAACTCTCCTCACTAACACTTTCTTTCTCTCCTTTTTAATTTCTTTCCTTCCATATTCTCTCTCTAAAGCAATTAATTAACAAAATGGAAGCTGCAACCATTACCACCAACGGTAACAGTGATTCATTCTGCTTGAAAAGTAATACTATTAATGGTAGTGATCCTTTGAATTGGGGTGTGGCCGCGGAGTCAATGAAGGGAAGCCACTTAGATGAGGTGAAGCGGATGGTGGAGGAGTACCGGAAACCGGTGGTTAGCCTCGACGGGGAGACGTTGACGATCGGGCAGGTGGCTGCGATCGCCGGAGCGTATGACCAAGGTGTGAGGGTGGAGCTGTTGGAATCTACTAGGGTTGGCGTTAAAGCTAGTAGTGA…	2157	ATGGAAGCTGCAACCATTACCACCAACGGTAACAGTGATTCATTCTGCTTGAAAAGTAATACTATTAATGGTAGTGATCCTTTGAATTGGGGTGTGGCCGCGGAGTCAATGAAGGGAAGCCACTTAGATGAGGTGAAGCGGATGGTGGAGGAGTACCGGAAACCGGTGGTTAGCCTCGACGGGGAGACGTTGACGATCGGGCAGGTGGCTGCGATCGCCGGAGCGTATGACCAAGGTGTGAGGGTGGAGCTGTTGGAATCTACTAGGGTTGGCGTTAAAGCTAGTAGTGATTGGATAATGGACAGTGTGAACAATGGGACTGACAGTTACGGCGTTACCACTGGCTTCGGTGTCAACTCCCACCGTCGAACCAAACAAGGTGGTGCTTTGCAGAAAGAG…	7.95667	5.03667	7.57667	8.66667	6.21	16.72	0.94	2.81	8.8	3.5	11.57	6.79	4.37	15.01	6.76	4.23
		Am_HQ_23823 (PAL)-b	2675	GAGGAAATATTTTCTTTCCTACTACATACACCCCCCTACCCTCCAAAACAAACTCTTGTTCAAATTCATGCAATCACAACCGACAATCCCACATTAGTCCATTTGTTCCTTTTCTTTTTGGTGACAATTCCTAACTGCCATTCACCAATTCCACCCCTTCAAAGAGATCGATCTATTACAAAAAATCACAATTAACGTCCTTTGATCAAAAAATCATGGAGTTTTCAAATGGAAATAGCAACGGTTCTAATTCTAATAATTCCTCGAACCTTTGCAATGGTGGGACCAGCAGTAATGATCCTTTAAACTGGGGAATGGCTGCGGATGCATTGAGAGGTAGTCATTTAGATGAGGTGAAGCGTATGGTAGAAGAGTACCGGAAACCGGTTGTGCCGTTAG…	2160	ATGGAGTTTTCAAATGGAAATAGCAACGGTTCTAATTCTAATAATTCCTCGAACCTTTGCAATGGTGGGACCAGCAGTAATGATCCTTTAAACTGGGGAATGGCTGCGGATGCATTGAGAGGTAGTCATTTAGATGAGGTGAAGCGTATGGTAGAAGAGTACCGGAAACCGGTTGTGCCGTTAGGTGGGAAGAACTTAACGATATCTCAAGTTGCTGCGGTGGCTACACATAGAACCGGTGTGGCGGTGGAGCTGGCTAATGAGGCACGCGGTGCCGTTAAAGCTAGTAGTGATTGGGTTGTTGATAGTATGAATAAAGGAACTGATAGCTATGGAGTCACCACGGGTTTCGGTGCAACGTCGCATAGGAGAACCAAAAACGGTGGTGCCCTCCAAAAT…	19.8567	29.9567	102.197	59.7267	10.45	28.75	20.37	29.51	34.01	26.35	83.21	95.1	128.28	60.69	75.95	42.54
		Am_HQ_24424 (PAL)-a	2667	GAGCCGCCGATTTCTTGTTCTATAATCGAACGTCAATAGTTATTTTCCCACCAACCCCCCTAGCGCTCCTTCGTGCATCGCTGCCACCCCTTATACTCACCTACCAATTACCAACGCACCAGATTTGAATTGGCCCCATCACCTTCCTTTATATAACCCCCCCTTCATCTCTCCCTTATTCCTCAGGAAATCAATCCTAATAATTTCCTTCTCATTTCTCACCCAACCAAAGATTCATTTCCTTAACAAACTTCAAGAATACTCATGGAGGGAGAAGGAGGCAATGGACACGTGTCAAACCACGTTACCGAAGCCGAATATTGCATCAGCAAAGCCGGTGGTGATCCACTCAACTGGGGTGTAGCAGCGGAGGCGCTGAAGGGGAGTCATTTGGATGAG…	2157	ATGGAGGGAGAAGGAGGCAATGGACACGTGTCAAACCACGTTACCGAAGCCGAATATTGCATCAGCAAAGCCGGTGGTGATCCACTCAACTGGGGTGTAGCAGCGGAGGCGCTGAAGGGGAGTCATTTGGATGAGGTGAAGCGGATGGTGGAGGAGTACCGCAATCCGGTGGTTAAGATCGGTGGTGAGACTCTTACCATTGCTCAGGTGGCTGGAATTGCCTCCCATGACGGAGGTGTTAAGGTGGAGTTGTCGGAATCGGCGAGGGCTGGCGTTAAGGCTAGTAGTGACTGGGTGATGAATAGCATGAACAATGGCACTGATAGCTATGGTGTTACCACCGGTTTCGGTGCTACTTCCCATCGTAGAACCAAACAGGGCGGTGCCTTGCAGAAAGAG…	336.82	159.613	191.427	155.383	538.14	274.18	198.14	163.92	149.86	165.06	107.26	204.06	262.96	161	185.1	120.05
		Am_HQ_28347 (PAL)-d	2567	GACCTACCAAACACATGAAACACAAAACCTCTATATAATCCTCAACAACCCTTCCATTTCAACTCAGAAAATCAATTCTCCACAACTCTCTTTCATAACATTTTCTTTCTCTCCTTCATTTTAATTTCTTTCCTTCCATTTTCTCTCTGAAACATTTTGCATTAATTAACAAAATGGAAGCTGCAACCATTACCAACAACTTTAACGGTGGCTCATTCTGCTTGAAGAATAGTACTATTAATGGTAGTGATCCATTGAATTGGGGTGTGGCGGCCGAGGCAATGAAGGGGAGTCACTTGGATGAGGTGAAGCGGATGGTGGAGGAGTACCGGACACCGGTGGTCAGGCTCGGTGGGGAGACGTTGACAATTTCACAGGTGGCTGCGATCGCCGGAGCAT…	2223	ATGGAAGCTGCAACCATTACCAACAACTTTAACGGTGGCTCATTCTGCTTGAAGAATAGTACTATTAATGGTAGTGATCCATTGAATTGGGGTGTGGCGGCCGAGGCAATGAAGGGGAGTCACTTGGATGAGGTGAAGCGGATGGTGGAGGAGTACCGGACACCGGTGGTCAGGCTCGGTGGGGAGACGTTGACAATTTCACAGGTGGCTGCGATCGCCGGAGCATATGACGATGGTGTGAGGGTGGAGCTGTCGGAATCTGCAAGGGCTGGTGTTAAGGCTAGTAGTGACTGGGTGATGAACAGTATGAACAATGGGACTGACAGTTACGGTGTTACCACCGGCTTCGGTGCTACCTCTCACCGCCGAACTAAACAAGGTGGCGCTTTGCAGAAAGAG…	32.7167	67.28	33.9833	78.7933	37.62	33.93	26.6	35.4	97.06	69.38	16.35	36.06	49.54	57.47	116.55	62.36
		Am_HQ_29880 (PAL)-d	2499	GAGAAAATCAATTCTCCACAACTTTCTTTCATAACATTTTCTTTCTCTCCATATTTTTAATTTCTTTCCTTCAATTTTCTCTCTAAAACATTTGTATTAACAAAATGGAAACTGCAACCATTACCAACAACTTTAACGGTGGTTCATTCTGTTTGAAGAATAGTACTATCAATGCTAGTGATCCATTGAATTGGGGTGTGGCTGCAGAGTCGATGAAGGGGAGTCACCTGGATGAGGTGAAGCGGATGGTGGAGGAGTACCGGACACCGGTGGTCAGGCTCGGCGGGGAAACGTTGACGATCTCGCAGGTCGCTGCGATCGCCGGAGCATACGATGATGGTGTGAGGGTGGAGCTGTCGGAATCTGCAAGGGCTGGTGTTAAGGCTAGTAGTGACTGGG…	2157	ATGGAAACTGCAACCATTACCAACAACTTTAACGGTGGTTCATTCTGTTTGAAGAATAGTACTATCAATGCTAGTGATCCATTGAATTGGGGTGTGGCTGCAGAGTCGATGAAGGGGAGTCACCTGGATGAGGTGAAGCGGATGGTGGAGGAGTACCGGACACCGGTGGTCAGGCTCGGCGGGGAAACGTTGACGATCTCGCAGGTCGCTGCGATCGCCGGAGCATACGATGATGGTGTGAGGGTGGAGCTGTCGGAATCTGCAAGGGCTGGTGTTAAGGCTAGTAGTGACTGGGTGATGAACAGTATGAACAATGGCACTGACAGTTACGGTGTTACCACCGGCTTCGGTGCTACCTCTCACCGCCGAACTAAACAAGGTGGCGCTTTGCAGAAAGAA…	50.0467	113.613	81.7367	137.967	22.99	66.74	60.41	46.33	119.96	174.55	36.96	77.85	130.4	86.08	151.44	176.38
		Am_HQ_34937 (PAL)-b	2367	GATTACCACTCAGAAAATCAATTCACCACAACTCTCCTCACTAACACTTTCTTTCTCTCCTTTTTAATTTCTTTCCTTCCATATTCTCTCTCTAAAGCAATTAATTAACAAAATGGAAGCTGCAACCATTACCACCAACGGTAACAGTGATTCATTCTGCTTGAAAAGTAATACTATTAATGGTAGTGATCCTTTGAATTGGGGTGTGGCCGCGGAGTCAATGAAGGGAAGCCACTTAGATGAGGTGAAGCGGATGGTGGAGGAGTACCGGAAACCGGTGGTTAGCCTCGACGGGGAGACGTTGACGATCGGGCAGGTGGCTGCGATCGCCGGAGCGTATGACCAAGGTGTGAGGGTGGAGCTGTTGGAATCTACTAGGGTTGGCGTTAAAGCTAGTAG…	1674	ATGCTAGTGAGAATCAATACGCTTCTCCAAGGGTACTCAGGCATTAGATTTGAAATCTTAGAAGCCCTAACCAAGCTCCTCAACAATAACATCACCCCGTGTTTACCACTTCGTGGAACAATCACTGCTTCAGGAGATTTGGTCCCTCTTTCTTACATTGTTGGTTTACTTATTGGTAGACCAAACTCGAAAGCTGTTGGACCCTCTGGAGAGATACTCAATGCAAAGGAAGCTTTCCAAATGGCTGGAATGAATGATGGTTTCTTTGAATTGAATCCCAAAGAAGGCTTTGCACTTGTTAATAGCACTGCTGCTGGTTCTGCCTTCGCTTCTATTGTTCTTTTTGATGCTAACATATTGGTTGTGTTGTCTGAAGTTCTATCAGCTATTTTTGCTGAA…	16.96	17.6767	24.5533	21.9667	4.6	38.08	8.2	2.69	20.1	30.24	7.53	18.21	47.92	12.33	20.28	33.29
rnaSPAdes	8	Am_Rn_009545 (PAL)-b	4411	TCTACTTAGTCCAAACTCCCAACCCACCATCTTTGACCATACAAAGTCATCACTACTAGTATTTCTTTATCTTTGGTTTACGTATTTTACGACCTTTAGATAATTAATACAAAATCATCACCAAACTATAGTATATTATATTACTTTCGTCCATGAGAAGTAATTTTAAACGCAAATACACAATTAATTCTTATTCTTTATTCTTTTTGTTTTTCAGGTTTTTGAATGCTGGAATATTTGGCAATGGTACTGAATCCAATTGTACACTGCCACACACAGCAACTAGAGCTGCCATGCTAGTGAGAATCAACACACTTCTTCAAGGGTACTCTGGTATTAGATTTGAAATCCTAGAAGCCATCACTAAGCTTCTAAACAACAACATCACCCCATGTTTGC…	969	ATGAGAAGTAATTTTAAACGCAAATACACAATTAATTCTTATTCTTTATTCTTTTTGTTTTTCAGGTTTTTGAATGCTGGAATATTTGGCAATGGTACTGAATCCAATTGTACACTGCCACACACAGCAACTAGAGCTGCCATGCTAGTGAGAATCAACACACTTCTTCAAGGGTACTCTGGTATTAGATTTGAAATCCTAGAAGCCATCACTAAGCTTCTAAACAACAACATCACCCCATGTTTGCCTCTTCGTGGAACAATCACAGCTTCTGGTGATCTTGTTCCCCTTTCTTACATTGCCGGTTTGCTAACTGGCCGACCTAACTCCAAAGCTGTTGGACCCTCTGGAGAGATTCTCAATGCCAAAGAAGCTTTTCAGTTGGCTAACATTGGTTCT…	6.34	6.14667	8.71667	9.16667	12.21	2.67	4.14	4.84	6.65	6.95	7.22	8.92	10.01	8.38	8.61	10.51
		Am_Rn_024501 (PAL)-d	3082	CACATGAAACAAACCTCTATATAATCCTCAACAACCCTTCCATTTCAACTCAGAAAATCAATTCTCCACAACTTTCTTTCATAACATTTTCTTTCTCTCCATATTTTTAATTTCTTTCCTTCAATTTTCTCTCTAAAACATTTGTATTAACAAAATGGAAACTGCAACCATTACCAACAACTTTAACGGTGGTTCATTCTGTTTGAAGAATAGTACTATCAATGCTAGTGATCCATTGAATTGGGGTGTGGCTGCAGAGTCGATGAAGGGGAGTCACCTGGATGAGGTGAAGCGGATGGTGGAGGAGTACCGGACACCGGTGGTCAGGCTCGGCGGGGAAACGTTGACGATCTCGCAGGTCGCTGCGATCGCCGGAGCATACGATGATGGTGTGAGGGT…	1674	ATGTTAGTGAGAATCAACACACTTCTCCAAGGCTACTCAGGCATTAGATTTGAAATCTTAGAGGCCATAACCAAGCTTCTCAACAACAATATCACCCCATGTTTACCACTTCGTGGTACAATCACAGCTTCAGGAGATTTGGTCCCTCTTTCTTACATTGCTGGTTTGCTTACTGGTAGACCAAACTCCAAAGCTGTTGGACCCTCTGGAGAGGTACTCAATGCAAAGGAAGCTTTTCAATTAGCCGGAATCAATGATGGTTTCTTTGAATTGCAGCCCAAAGAAGGCCTTGCACTTGTCAATGGCACTGCAGTTGGTTCTGCCTTAGCATCTATCGTTCTCTTTGATGCTAACATATTGGTTGTCTTGTCTGAAGTTCTATCAGCTATATTTGCTGAA…	48.2867	108.657	66.39	137.487	39.51	59.93	45.42	65.84	119.32	140.81	36	68.5	94.67	114.79	165.01	132.66
		Am_Rn_024732 (PAL)-b	3069	ATTACATAGAGAAAAATATATTTAATCATATTTCTTTCAAAGATTGTGTTATGATTTGAAGGGTAGGTGCGGTAGATATATTTCCTGGATCCCTCTCTACCTACCATTAATTACCAAACACATGAAATAAACCTCTATATATATAATCCCCAACCAGAGCCTTACATTACCACTCAGAAAATCAATTCACCACAACTCTCCTCACTAACACTTTCTTTCTCTCCTTTTTAATTTCTTTCCTTCCATATTCTCTCTCTAAAGCAATTAATTAACAAAATGGAAGCTGCAACCATTACCACCAACGGTAACAGTGATTCATTCTGCTTGAAAAGTAATACTATTAATGGTAGTGATCCTTTGAATTGGGGTGTGGCCGCGGAGTCAATGAAGGGAAGCCAC…	2157	ATGGAAGCTGCAACCATTACCACCAACGGTAACAGTGATTCATTCTGCTTGAAAAGTAATACTATTAATGGTAGTGATCCTTTGAATTGGGGTGTGGCCGCGGAGTCAATGAAGGGAAGCCACTTAGATGAGGTGAAGCGGATGGTGGAGGAGTACCGGAAACCGGTGGTTAGCCTCGACGGGGAGACGTTGACGATCGGGCAGGTGGCTGCGATCGCCGGAGCGTATGACCAAGGTGTGAGGGTGGAGCTGTTGGAATCTACTAGGGTTGGCGTTAAAGCTAGTAGTGATTGGATAATGGACAGTGTGAACAATGGGACTGACAGTTACGGCGTTACCACTGGCTTCGGTGTCAACTCCCACCGTCGAACCAAACAAGGTGGTGCTTTGCAGAAAGAG…	20.96	22.8267	26	29.3933	10.09	45.93	6.86	6.92	29.76	31.8	14.34	21.78	41.88	27.45	27.79	32.94
		Am_Rn_028045 (PAL)-a	2887	ATGGATTATTAAATTGAAAGGACTGCAATTCCCTTCCCATCCCACTTGTCACCCGTAGTTGGTGTTCATTTTTTGTATAATGTGTATATCTTCTCTTCCACTGCTAATCGCCAACTACTTGGTGTTTTGTGTCCACAACCACAAGGCGACATCCCACCCAGCTACCAATAAGGTTCTAATTGGATGCCACGTAGCATAAATAATAGCCGCCGATTTCTTGTTCTATAATCGAACGTCAATAGTTATTTTCCCACCAACCCCCCTAGCGCTCCTTCGTGCATCGCTGCCACCCCTTATACTCACCTACCAATTACCAACGCACCAGATTTGAATTGGCCCCATCACCTTCCTTTATATAACCCCCCCTTCATCTCTCCCTTATTCCTCAGGAAATCAATC…	2157	ATGGAGGGAGAAGGAGGCAATGGACACGTGTCAAACCACGTTACCGAAGCCGAATATTGCATCAGCAAAGCCGGTGGTGATCCACTCAACTGGGGTGTAGCAGCGGAGGCGCTGAAGGGGAGTCATTTGGATGAGGTGAAGCGGATGGTGGAGGAGTACCGCAATCCGGTGGTTAAGATCGGTGGTGAGACTCTTACCATTGCTCAGGTGGCTGGAATTGCCTCCCATGACGGAGGTGTTAAGGTGGAGTTGTCGGAATCGGCGAGGGCTGGCGTTAAGGCTAGTAGTGACTGGGTGATGAATAGCATGAACAATGGCACTGATAGCTATGGTGTTACCACCGGTTTCGGTGCTACTTCCCATCGTAGAACCAAACAGGGCGGTGCCTTGCAGAAAGAG…	308.083	165.77	176.093	158.873	502.88	255.18	166.19	172.09	152.79	172.43	81.11	197.81	249.36	161.37	193.76	121.49
		Am_Rn_029986 (PAL)-b	2788	CTATATATGCCCTCCATTTTCGGCTCTTATTTTTCAGGAAATATTTTCTTTCCTACTACATACACCCCCCTACCCTCCAAAACAAACTCTTGTTCAAATTCATGCAATCACAACCGACAATCCCACATTAGTCCATTTGTTCCTTTTCTTTTTGGTGACAATTCCTAACTGCCATTCACCAATTCCACCCCTTCAAAGAGATCGATCTATTACAAAAAATCACAATTAACGTCCTTTGATCAAAAAATCATGGAGTTTTCAAATGGAAATAGCAACGGTTCTAATTCTAATAATTCCTCGAACCTTTGCAATGGTGGGACCAGCAGTAATGATCCTTTAAACTGGGGAATGGCTGCGGATGCATTGAGAGGTAGTCATTTAGATGAGGTGAAGCGTATG…	2160	ATGGAGTTTTCAAATGGAAATAGCAACGGTTCTAATTCTAATAATTCCTCGAACCTTTGCAATGGTGGGACCAGCAGTAATGATCCTTTAAACTGGGGAATGGCTGCGGATGCATTGAGAGGTAGTCATTTAGATGAGGTGAAGCGTATGGTAGAAGAGTACCGGAAACCGGTTGTGCCGTTAGGTGGGAAGAACTTAACGATATCTCAAGTTGCTGCGGTGGCTACACATAGAACCGGTGTGGCGGTGGAGCTGGCTAATGAGGCACGCGGTGCCGTTAAAGCTAGTAGTGATTGGGTTGTTGATAGTATGAATAAAGGAACTGATAGCTATGGAGTCACCACGGGTTTCGGTGCAACGTCGCATAGGAGAACCAAAAACGGTGGTGCCCTCCAAAAT…	18.8033	32.54	97.6867	64.69	10.31	28.1	18	32.38	36.45	28.79	68.44	97.18	127.44	64.63	84.06	45.38
		Am_Rn_047201 (PAL)-d	2097	TCCGATCTTGCTAGTACTTATTCATCTTAATTATTGTTCTTCAGGTTTTTGAATGCTGGAATATTTGGCAATAGGACAGACTCAAGCCACACGCTGCCACAAACTGCAACAAGAGCAGCCATGCTAGTAAGAATCAACACACTTCTCCAGGGGTACTCAGGCATTAGATTTGAAATCTTAAACAACAACATCACCCCATGTTTACCACTTCGTGGTACAATCACGGCTTCAGGAGATTTGGTCCCTCTTTCTTACATTGCCGGTTTGCTTACTGGTAGACCAAACTCCAAAGCTGTTGGGCCCTCTGGAGAGTTACTCAATGCAAAGGAAGCTTTCCAATTGGCTGGAATTAATGATGGTTTCTTTGAATTGCAGCCCAAAGAAATCCTTGCACTTGTT…	1653	ATGCTAGTAAGAATCAACACACTTCTCCAGGGGTACTCAGGCATTAGATTTGAAATCTTAAACAACAACATCACCCCATGTTTACCACTTCGTGGTACAATCACGGCTTCAGGAGATTTGGTCCCTCTTTCTTACATTGCCGGTTTGCTTACTGGTAGACCAAACTCCAAAGCTGTTGGGCCCTCTGGAGAGTTACTCAATGCAAAGGAAGCTTTCCAATTGGCTGGAATTAATGATGGTTTCTTTGAATTGCAGCCCAAAGAAATCCTTGCACTTGTTAATGGCACTGCAGTTGGTTCTGCCTTAGCTTCTATTGTTCTCTTTGATGCTAACATATTGGCTGTCTTGTCTGAAGTTCTATCAGCTATTTTTGCTAAAGTCATGCAAGGAAAACCAGAA…	7.29	18.2933	8.61	21.2233	7.81	7.23	6.83	9.12	25.13	20.63	3.79	9.23	12.81	17.3	29.08	17.29
		Am_Rn_073673 (PAL)-d	1340	CTCTCCTCCACCTACCAAACACATGAAACAAAACCTCTATATAATCCTCAACAACCCTTCCATTTCAACTCAGAAAATCAATTCTCCACAACTCTCTTTCATAACATTTTCTTTCTCTCCTTCATTTTAATTTCTTTCCTTCCATTTTCTCTTAACATTTTGCATTAATTAACAAAATGGAAGCTGCAACCATTACCAACAACTTTAACGGTGGCTCATTCTGCTTGAAGAATAGTACTATTAATGGTAGTGATCCATTGAATTGGGGTGTGGCGGCCGAGGCAATGAAGGGGAGTCACTTGGATGAGGTGAAGCGGATGGTGGAGGAGTACCGGACACCGGTGGTCAGGCTCGGTGGGGAGACGTTGACAATTTCACAGGTGGCTGCGATCGCCGGAG…	1164	ATGGAAGCTGCAACCATTACCAACAACTTTAACGGTGGCTCATTCTGCTTGAAGAATAGTACTATTAATGGTAGTGATCCATTGAATTGGGGTGTGGCGGCCGAGGCAATGAAGGGGAGTCACTTGGATGAGGTGAAGCGGATGGTGGAGGAGTACCGGACACCGGTGGTCAGGCTCGGTGGGGAGACGTTGACAATTTCACAGGTGGCTGCGATCGCCGGAGCATATGACGATGGTGTGAGGGTGGAGCTGTCGGAATCTGCAAGGGTTGGTGTTAAGGCTAGTAGTGACTGGGTGATGAACAGTATGAACAATGGGACTGACAGTTACGGTGTTACCACCGGCTTCGGTGCTACCTCTCACCGCCGAACTAAACAAGGTGGCGCTTTGCAGAAAGAG…	30.1267	79.1	37.2467	88.85	33.33	35.91	21.14	36.64	110.95	89.71	8.85	39.01	63.88	50.18	132.72	83.65
		Am_Rn_074293 (PAL)-d	1326	CACATGAAACAAACCTCTATATAATCCTCAACAACCCTTCCATTTCAACTCAGAAAATCAATTCTCCACAACTTTCTTTCATAACATTTTCTTTCTCTCCATATTTTTAATTTCTTTCCTTCAATTTTCTCTCTAAAACATTTGTATTAACAAAATGGAAACTGCAACCATTACCAACAACTTTAACGGTGGTTCATTCTGTTTGAAGAATAGTACTATCAATGCTAGTGATCCATTGAATTGGGGTGTGGCTGCAGAGTCGATGAAGGGGAGTCACCTGGATGAGGTGAAGCGGATGGTGGAGGAGTACCGGACACCGGTGGTCAGGCTCGGCGGGGAAACGTTGACGATCTCGCAGGTCGCTGCGATCGCCGGAGCATACGATGATGGTGTGAGGGT…	1170	ATGGAAACTGCAACCATTACCAACAACTTTAACGGTGGTTCATTCTGTTTGAAGAATAGTACTATCAATGCTAGTGATCCATTGAATTGGGGTGTGGCTGCAGAGTCGATGAAGGGGAGTCACCTGGATGAGGTGAAGCGGATGGTGGAGGAGTACCGGACACCGGTGGTCAGGCTCGGCGGGGAAACGTTGACGATCTCGCAGGTCGCTGCGATCGCCGGAGCATACGATGATGGTGTGAGGGTGGAGCTGTCGGAATCTGCAAGGGCTGGTGTTAAGGCTAGTAGTGACTGGGTGATGAACAGTATGAACAATGGCACTGACAGTTACGGTGTTACCACCGGCTTCGGTGCTACCTCTCACCGCCGAACTAAACAAGGTGGCGCTTTGCAGAAAGAA…	24.1633	79.5133	45.3633	82.6333	12.93	39.89	19.67	50.99	82.48	105.07	9.88	55.8	70.41	44.29	91.31	112.3
Trinity	9	Am_Tr_117304 (PAL)-a	2000	ATGGATTATTAAATTGAAAGGACTGCAATTCCCTTCCCATCCCACTTGTCACCCGTAGTTGGTGTTCATTTTTTGTATAATGTGTATATCTTCTCTTCCACTGCTAATCGCCAACTACTTGGTGTTTTGTGTCCACAACCACAAGGCGACATCCCACCCAGCTACCAATAAGGTTCTAATTGGATGCCACGTAGCATAAATAATAGCCGCCGATTTCTTGTTCTATAATCGAACGTCAATAGTTATTTTCCCACCAACCCCCCTAGCGCTCCTTCGTGCATCGCTGCCACCCCTTATACTCACCTACCAATTACCAACGCACCAGATTTGAATTGGCCCCATCACCTTCCTTTATATAACCCCCCCTTCATCTCTCCCTTATTCCTCAGGAAATCAATC…	1533	ATGGAGGGAGAAGGAGGCAATGGACACGTGTCAAACCACGTTACCGAAGCCGAATATTGCATCAGCAAAGCCGGTGGTGATCCACTCAACTGGGGTGTAGCAGCGGAGGCGCTGAAGGGGAGTCATTTGGATGAGGTGAAGCGGATGGTGGAGGAGTACCGCAATCCGGTGGTTAAGATCGGTGGTGAGACTCTTACCATTGCTCAGGTGGCTGGAATTGCCTCCCATGACGGAGGTGTTAAGGTGGAGTTGTCGGAATCGGCGAGGGCTGGCGTTAAGGCTAGTAGTGACTGGGTGATGAATAGCATGAACAATGGCACTGATAGCTATGGTGTTACCACCGGTTTCGGTGCTACTTCCCATCGTAGAACCAAACAGGGCGGTGCCTTGCAGAAAGAG…	224.23	108.267	105.24	93.3833	362.98	193.32	116.39	110.71	100.69	113.4	29.8	125.86	160.06	84.69	112.62	82.84
[truncated: 226 more rows]

## Sheet: Table S12
Supplementary Table 12. Primer sets information used in RT-PCR.
[truncated: 435 more rows]

[truncated: 1 more sheets: Table S13]
