# Supplementary material for: Enhancing transcriptome analysis in medicinal plants: multiple unigene sets in Astragalus membranaceus
Source: Front Plant Sci. 2024 Feb 7;15:1301526. doi: 10.3389/fpls.2024.1301526 (PMC10879423; doi:10.3389/fpls.2024.1301526)
Supplement: Supplementary file 9 [file Table_8.xlsx]

## Sheet: Table S14
Supplementary Table 14. Number of DEGs between each sample.
Up- and down-regulated DEGs were colored red and blue, respectively.
*Set-1, PacBio HQ CCS; Set-2, rnaSPAdes-assembled contigs; Set-3, Trinity-assembled contigs.
	Roots vs. Leaves	Roots vs. Flowers	Roots vs. Stems
*Set-1	5603/6321	5461/6572	4771/5742
*Set-2	7080/8240	6944/9284	6055/7276
*Set-3	7368/8723	7225/9512	6289/7340

## Sheet: Table S15
Supplementary Table 15. GO analysis based on DEGs (Roots vs. Leaves).
Cutoff: BaseMean > 50, log2FC > 2, pvalue < 0.01, padj < 0.01, Number of unigenes assigned ≥ 3.
Set	GO information (biological process)	Number of unigenes assigned	FC average
Set-1	xenobiotic transmembrane transport_GO:0006855	10	6.9249
	vesicle docking involved in exocytosis_GO:0006904	3	2.3757
	tryptophan biosynthetic process_GO:0000162	4	2.9227
	starch metabolic process_GO:0005982	18	4.41691
	RNA modification_GO:0009451	3	2.468
	regulation of transcription, DNA-templated_GO:0006355	3	2.55776
	regulation of alternative mRNA splicing, via spliceosome_GO:0000381	5	2.45231
	protein peptidyl-prolyl isomerization_GO:0000413	4	5.83636
	polysaccharide catabolic process_GO:0000272	3	3.19748
	obsolete electron transport_GO:0006118	4	5.28646
	obsolete acyl-carrier-protein biosynthetic process_GO:0042967	6	4.70768
	mRNA splicing, via spliceosome_GO:0000398	7	2.96093
	metal ion transport_GO:0030001	5	2.99775
	jasmonic acid metabolic process_GO:0009694	3	4.94604
	gibberellin biosynthetic process_GO:0009686	4	4.68174
	galactose metabolic process_GO:0006012	3	3.08496
	fucose metabolic process_GO:0006004	7	3.60204
	flavonoid biosynthetic process_GO:0009813	4	5.28642
	fatty acid biosynthetic process_GO:0006633	3	7.68995
	defense response_GO:0006952	5	6.81176
	coumarin biosynthetic process_GO:0009805	7	3.24224
	cellulose microfibril organization_GO:0010215	3	3.40559
	cellular amino acid metabolic process_GO:0006520	5	4.872
	carbohydrate transport_GO:0008643	4	4.4129
	carbohydrate metabolic process_GO:0005975	11	4.22692
	aromatic compound biosynthetic process_GO:0019438	3	8.47925
	amino acid transmembrane transport_GO:0003333	5	3.26821
Set-2	xenobiotic transmembrane transport_GO:0006855	8	6.8295
	ubiquitin-dependent protein catabolic process_GO:0006511	3	8.15447
	tryptophan biosynthetic process_GO:0000162	6	3.49514
	starch metabolic process_GO:0005982	23	5.50806
	RNA modification_GO:0009451	4	4.11903
	response to reactive oxygen species_GO:0000302	3	6.62682
	regulation of DNA-templated transcription_GO:0006355	3	3.03837
	proteolysis_GO:0006508	5	3.00566
	protein transport_GO:0015031	3	2.49637
	protein peptidyl-prolyl isomerization_GO:0000413	3	2.16661
	protein glycosylation_GO:0006486	3	3.08782
	oligopeptide transport_GO:0006857	3	2.57381
	obsolete electron transport_GO:0006118	10	5.88621
	obsolete acyl-carrier-protein biosynthetic process_GO:0042967	5	2.87446
	nitric oxide biosynthetic process_GO:0006809	4	4.3701
	mRNA splicing, via spliceosome_GO:0000398	10	2.59766
	mitochondrial fission_GO:0000266	4	7.56961
	metal ion transport_GO:0030001	12	3.70959
	jasmonic acid metabolic process_GO:0009694	4	4.74001
	indole biosynthetic process_GO:0042432	3	3.93714
	galactose metabolic process_GO:0006012	7	3.96832
	fucose metabolic process_GO:0006004	5	3.39292
	formation of translation preinitiation complex_GO:0001731	4	2.67849
	flavonoid biosynthetic process_GO:0009813	6	6.81419
	double-strand break repair via homologous recombination_GO:0000724	3	2.60385
	DNA repair_GO:0006281	3	3.32362
	defense response_GO:0006952	8	7.64779
	coumarin biosynthetic process_GO:0009805	8	3.23117
	cellular amino acid metabolic process_GO:0006520	3	7.79106
	catabolic process; pollen tube growth_GO:0009056	3	3.06079
	carbohydrate metabolic process_GO:0005975	14	5.04827
	aromatic compound biosynthetic process_GO:0019438	3	8.51039
	amino acid transmembrane transport_GO:0003333	8	2.91892
	alanine metabolic process_GO:0006522	3	4.69343
Set-3	xenobiotic transmembrane transport_GO:0006855	16	5.53637
	vesicle docking involved in exocytosis_GO:0006904	3	2.55115
	tryptophan biosynthetic process_GO:0000162	8	3.3634
	taurine metabolic process_GO:0019530	3	6.7464
	starch metabolic process_GO:0005982	20	4.63425
	signal transduction_GO:0007165	3	5.73197
	response to reactive oxygen species_GO:0000302	3	4.89071
	regulation of transcription, DNA-templated_GO:0006355	3	3.03582
	proteolysis_GO:0006508	4	4.20649
	protein peptidyl-prolyl isomerization_GO:0000413	3	5.11925
	obsolete electron transport_GO:0006118	13	5.61254
	obsolete acyl-carrier-protein biosynthetic process_GO:0042967	7	3.93123
	nodulation_GO:0009877	3	6.3511
	mRNA splicing, via spliceosome_GO:0000398	8	2.64521
	microtubule cytoskeleton organization_GO:0000226	3	6.83528
	metal ion transport_GO:0030001	11	3.74735
	jasmonic acid metabolic process_GO:0009694	3	3.95355
	indole biosynthetic process_GO:0042432	3	3.88121
	glycosphingolipid metabolic process_GO:0006687	3	2.96686
	galactose metabolic process_GO:0006012	4	3.34646
	fucose metabolic process_GO:0006004	3	2.81374
	fructose metabolic process_GO:0006000	5	3.85699
	flavonoid biosynthetic process_GO:0009813	10	4.17326
	fatty acid biosynthetic process_GO:0006633	4	8.77424
	defense response_GO:0006952	4	6.16118
	coumarin biosynthetic process_GO:0009805	10	3.29683
	cellulose microfibril organization_GO:0010215	3	3.08778
	cellular aldehyde metabolic process_GO:0006081	3	6.31326
	catabolic process_GO:0009056	4	2.83392
	carbohydrate transport_GO:0008643	4	4.77892
	carbohydrate metabolic process_GO:0005975	8	4.24905
	aromatic compound biosynthetic process_GO:0019438	3	9.23418
	amino acid transmembrane transport_GO:0003333	5	4.35274
	alanine metabolic process_GO:0006522	4	4.41117

## Sheet: Table S16
Supplementary Table 16. KEGG analysis based on DEGs (Roots vs. leaves).
Cutoff: BaseMean > 50, log2FC > 2, pvalue < 0.01, padj < 0.01, Number of unigenes assigned ≥ 3.
Set	KEGG information	Number of unigenes assigned	FC average
Set-1	Thermogenesis [PATH:ko04714]	3	3.2217
	Circadian rhythm - plant [PATH:ko04712]	3	3.32157
	Plant-pathogen interaction [PATH:ko04626]	9	3.11034
	Axon regeneration [PATH:ko04361]	4	4.0178
	Synaptic vesicle cycle [PATH:ko04721]	4	2.53762
	Apoptosis - fly [PATH:ko04214]	3	2.55451
	Cell cycle [PATH:ko04110]	4	3.36687
	Peroxisome [PATH:ko04146]	3	2.938
	Endocytosis [PATH:ko04144]	4	2.70367
	Lysosome [PATH:ko04142]	4	3.98579
	Apelin signaling pathway [PATH:ko04371]	3	2.77032
	Plant hormone signal transduction [PATH:ko04075]	10	6.0378
	MAPK signaling pathway - plant [PATH:ko04016]	19	3.31199
	Protein processing in endoplasmic reticulum [PATH:ko04141]	15	3.52548
	SNARE interactions in vesicular transport [PATH:ko04130]	7	2.65057
	Ubiquitin mediated proteolysis [PATH:ko04120]	7	6.28026
	RNA degradation [PATH:ko03018]	6	6.14507
	mRNA surveillance pathway [PATH:ko03015]	12	2.94184
	Nucleocytoplasmic transport [PATH:ko03013]	15	3.14838
	Ribosome [PATH:ko03010]	16	2.54294
	Spliceosome [PATH:ko03040]	26	2.81064
	RNA polymerase [PATH:ko03020]	4	2.64239
	Biosynthesis of various plant secondary metabolites [PATH:ko00999]	7	4.33389
	Tropane, piperidine and pyridine alkaloid biosynthesis [PATH:ko00960]	6	3.6371
	Isoflavonoid biosynthesis [PATH:ko00943]	12	2.8001
	Flavonoid biosynthesis [PATH:ko00941]	7	4.59644
	Phenylpropanoid biosynthesis [PATH:ko00940]	21	4.94597
	Zeatin biosynthesis [PATH:ko00908]	3	4.90265
	Diterpenoid biosynthesis [PATH:ko00904]	4	4.68174
	Terpenoid backbone biosynthesis [PATH:ko00900]	3	3.23186
	Thiamine metabolism [PATH:ko00730]	4	2.62718
	Ubiquinone and other terpenoid-quinone biosynthesis [PATH:ko00130]	5	4.82945
	Glutathione metabolism [PATH:ko00480]	12
	Phenylalanine, tyrosine and tryptophan biosynthesis [PATH:ko00400]	3	2.84478
	Tryptophan metabolism [PATH:ko00380]	5	4.1569
	Arginine and proline metabolism [PATH:ko00330]	4	4.79009
	Valine, leucine and isoleucine biosynthesis [PATH:ko00290]	5	2.71633
	Cysteine and methionine metabolism [PATH:ko00270]	11	5.42799
	Glycine, serine and threonine metabolism [PATH:ko00260]	8	2.72883
	Alanine, aspartate and glutamate metabolism [PATH:ko00250]	3	4.2985
	Pyrimidine metabolism [PATH:ko00240]	3	2.63437
	Purine metabolism [PATH:ko00230]	7	2.67167
	Sphingolipid metabolism [PATH:ko00600]	6	2.7985
	alpha-Linolenic acid metabolism [PATH:ko00592]	3	4.21145
	Arachidonic acid metabolism [PATH:ko00590]	3	3.89639
	Glycerophospholipid metabolism [PATH:ko00564]	6	2.70812
	Glycerolipid metabolism [PATH:ko00561]	5	3.12527
	Steroid biosynthesis [PATH:ko00100]	6	2.72175
	Fatty acid degradation [PATH:ko00071]	5	5.68032
	Sulfur metabolism [PATH:ko00920]	3	2.10313
	Nitrogen metabolism [PATH:ko00910]	7	4.02942
	Oxidative phosphorylation [PATH:ko00190]	7	4.11302
	Glyoxylate and dicarboxylate metabolism [PATH:ko00630]	6	2.86279
	Pyruvate metabolism [PATH:ko00620]	5	3.98263
	Amino sugar and nucleotide sugar metabolism [PATH:ko00520]	11	3.28766
	Starch and sucrose metabolism [PATH:ko00500]	19	3.78853
	Ascorbate and aldarate metabolism [PATH:ko00053]	8	6.58492
	Galactose metabolism [PATH:ko00052]	10	4.80806
	Fructose and mannose metabolism [PATH:ko00051]	10	3.74869
	Pentose and glucuronate interconversions [PATH:ko00040]	12	6.02998
	Pentose phosphate pathway [PATH:ko00030]	6	2.54495
	Glycolysis / Gluconeogenesis [PATH:ko00010]	36	5.66095
Set-2	Glycolysis / Gluconeogenesis [PATH:ko00010]	48	5.55207
	Citrate cycle (TCA cycle) [PATH:ko00020]	4	2.61685
	Pentose phosphate pathway [PATH:ko00030]	8	3.301
	Pentose and glucuronate interconversions [PATH:ko00040]	14	5.2987
	Fructose and mannose metabolism [PATH:ko00051]	7	3.72313
	Galactose metabolism [PATH:ko00052]	16	4.82658
	Ascorbate and aldarate metabolism [PATH:ko00053]	7	7.42742
	Starch and sucrose metabolism [PATH:ko00500]	36	5.22013
	Amino sugar and nucleotide sugar metabolism [PATH:ko00520]	14	3.55522
	Pyruvate metabolism [PATH:ko00620]	5	5.46682
	Glyoxylate and dicarboxylate metabolism [PATH:ko00630]	9	3.338
	Propanoate metabolism [PATH:ko00640]	7	3.6978
	Oxidative phosphorylation [PATH:ko00190]	10	3.81857
	Carbon fixation in photosynthetic organisms [PATH:ko00710]	3	2.97247
	Nitrogen metabolism [PATH:ko00910]	10	4.17237
	Fatty acid biosynthesis [PATH:ko00061]	3	7.81274
	Steroid biosynthesis [PATH:ko00100]	7	2.95138
	Glycerolipid metabolism [PATH:ko00561]	4	3.81832
	Glycerophospholipid metabolism [PATH:ko00564]	7	2.77819
	Arachidonic acid metabolism [PATH:ko00590]	4	5.39675
	Sphingolipid metabolism [PATH:ko00600]	5	2.43027
	Purine metabolism [PATH:ko00230]	7	3.82521
	Pyrimidine metabolism [PATH:ko00240]	4	2.40615
	Alanine, aspartate and glutamate metabolism [PATH:ko00250]	6	4.88806
	Glycine, serine and threonine metabolism [PATH:ko00260]	6	2.88037
	Cysteine and methionine metabolism [PATH:ko00270]	12	6.08728
	Valine, leucine and isoleucine degradation [PATH:ko00280]	3	2.33373
	Arginine and proline metabolism [PATH:ko00330]	4	5.16665
	Phenylalanine, tyrosine and tryptophan biosynthesis [PATH:ko00400]	3	2.76308
	Glutathione metabolism [PATH:ko00480]	14	4.26493
	Glycosylphosphatidylinositol (GPI)-anchor biosynthesis [PATH:ko00563]	3	5.00899
	Ubiquinone and other terpenoid-quinone biosynthesis [PATH:ko00130]	8	5.24527
	Thiamine metabolism [PATH:ko00730]	5	3.09724
	Lipoic acid metabolism [PATH:ko00785]	4	2.37675
	Terpenoid backbone biosynthesis [PATH:ko00900]	5	2.95129
	Diterpenoid biosynthesis [PATH:ko00904]	3	4.68274
	Zeatin biosynthesis [PATH:ko00908]	3	4.82952
	Phenylpropanoid biosynthesis [PATH:ko00940]	24	4.75005
	Flavonoid biosynthesis [PATH:ko00941]	12	5.71215
	Isoflavonoid biosynthesis [PATH:ko00943]	11	2.98706
	Tropane, piperidine and pyridine alkaloid biosynthesis [PATH:ko00960]	3	3.07501
	Biosynthesis of various plant secondary metabolites [PATH:ko00999]	4	4.01566
	Spliceosome [PATH:ko03040]	30	3.32951
	Ribosome biogenesis in eukaryotes [PATH:ko03008]	10	2.52694
	Ribosome [PATH:ko03010]	26	2.96644
	Nucleocytoplasmic transport [PATH:ko03013]	19	4.31002
	mRNA surveillance pathway [PATH:ko03015]	7	2.59437
	RNA degradation [PATH:ko03018]	4	4.71997
	Ubiquitin mediated proteolysis [PATH:ko04120]	11	4.17461
	SNARE interactions in vesicular transport [PATH:ko04130]	11	2.41573
	Protein processing in endoplasmic reticulum [PATH:ko04141]	24	5.59168
	Homologous recombination [PATH:ko03440]	4	3.96366
	ABC transporters [PATH:ko02010]	4	4.0594
	MAPK signaling pathway [PATH:ko04010]	4	3.10307
	MAPK signaling pathway - plant [PATH:ko04016]	23	4.07975
	Plant hormone signal transduction [PATH:ko04075]	17	7.72737
	Wnt signaling pathway [PATH:ko04310]	4	2.74418
	Apelin signaling pathway [PATH:ko04371]	3	2.51166
	Lysosome [PATH:ko04142]	6	6.9858
	Endocytosis [PATH:ko04144]	3	2.27518
	Peroxisome [PATH:ko04146]	5	2.84215
	Axon regeneration [PATH:ko04361]	5	4.3332
	Plant-pathogen interaction [PATH:ko04626]	9	4.22717
	Thermogenesis [PATH:ko04714]	4	4.80848
Set-3	Glycolysis / Gluconeogenesis [PATH:ko00010]	39	5.5569
	Pentose phosphate pathway [PATH:ko00030]	9	3.24583
	Pentose and glucuronate interconversions [PATH:ko00040]	13	5.84072
	Fructose and mannose metabolism [PATH:ko00051]	9	3.96205
	Galactose metabolism [PATH:ko00052]	16	4.7686
	Ascorbate and aldarate metabolism [PATH:ko00053]	8	7.4051
	Starch and sucrose metabolism [PATH:ko00500]	22	3.87908
	Amino sugar and nucleotide sugar metabolism [PATH:ko00520]	13	3.27843
	Pyruvate metabolism [PATH:ko00620]	7	4.90671
	Glyoxylate and dicarboxylate metabolism [PATH:ko00630]	8	3.18825
	Propanoate metabolism [PATH:ko00640]	3	5.51166
	Oxidative phosphorylation [PATH:ko00190]	9	5.14383
	Nitrogen metabolism [PATH:ko00910]	7	4.18985
	Sulfur metabolism [PATH:ko00920]	3	2.20241
	Fatty acid biosynthesis [PATH:ko00061]	5	8.32727
	Steroid biosynthesis [PATH:ko00100]	4	2.85695
	Glycerolipid metabolism [PATH:ko00561]	7	6.19508
	Glycerophospholipid metabolism [PATH:ko00564]	4	3.31214
	Sphingolipid metabolism [PATH:ko00600]	5	2.78088
	Purine metabolism [PATH:ko00230]	6	2.63721
	Alanine, aspartate and glutamate metabolism [PATH:ko00250]	5	4.64329
	Glycine, serine and threonine metabolism [PATH:ko00260]	8	3.74551
	Cysteine and methionine metabolism [PATH:ko00270]	12	5.57484
	Arginine and proline metabolism [PATH:ko00330]	5	5.8232
	Tryptophan metabolism [PATH:ko00380]	6	3.95941
	Phenylalanine, tyrosine and tryptophan biosynthesis [PATH:ko00400]	4	2.68518
	Glutathione metabolism [PATH:ko00480]	13	4.52397
	N-Glycan biosynthesis [PATH:ko00510]	3	2.22724
	Glycosaminoglycan degradation [PATH:ko00531]	3	2.45911
	Ubiquinone and other terpenoid-quinone biosynthesis [PATH:ko00130]	9	5.29447
	Thiamine metabolism [PATH:ko00730]	4	2.72153
	Terpenoid backbone biosynthesis [PATH:ko00900]	3	3.48108
	Zeatin biosynthesis [PATH:ko00908]	4	4.68579
	Phenylpropanoid biosynthesis [PATH:ko00940]	25	5.65637
	Flavonoid biosynthesis [PATH:ko00941]	14	3.89986
	Isoflavonoid biosynthesis [PATH:ko00943]	13	2.99615
	Tropane, piperidine and pyridine alkaloid biosynthesis [PATH:ko00960]	5	3.62578
	Biosynthesis of various plant secondary metabolites [PATH:ko00999]	8	4.08828
	RNA polymerase [PATH:ko03020]	8	5.30329
	Spliceosome [PATH:ko03040]	17	2.79113
	Ribosome biogenesis in eukaryotes [PATH:ko03008]	7	3.82731
	Ribosome [PATH:ko03010]	18	3.1872
	Nucleocytoplasmic transport [PATH:ko03013]	23	3.71093
	mRNA surveillance pathway [PATH:ko03015]	13	3.80836
	RNA degradation [PATH:ko03018]	4	3.32319
	Ubiquitin mediated proteolysis [PATH:ko04120]	5	3.84741
	SNARE interactions in vesicular transport [PATH:ko04130]	9	2.74114
	Protein processing in endoplasmic reticulum [PATH:ko04141]	15	3.82387
	DNA replication [PATH:ko03030]	4	2.58724
	MAPK signaling pathway [PATH:ko04010]	4	3.50972
	MAPK signaling pathway - plant [PATH:ko04016]	24	3.96659
	FoxO signaling pathway [PATH:ko04068]	3	2.57797
	Phospholipase D signaling pathway [PATH:ko04072]|A 9140 Cellular Processes	6	2.87283
	Plant hormone signal transduction [PATH:ko04075]	16	6.02411
	Wnt signaling pathway [PATH:ko04310]	3	3.94554
	Notch signaling pathway [PATH:ko04330]	3	2.7446
	Apelin signaling pathway [PATH:ko04371]	4	2.89145
	Autophagy - animal [PATH:ko04140]	3	4.34463
	Lysosome [PATH:ko04142]	3	4.03276
	Endocytosis [PATH:ko04144]	6	3.40145
	Peroxisome [PATH:ko04146]	4	2.48713
	Regulation of actin cytoskeleton [PATH:ko04810]	4	3.17987
	Synaptic vesicle cycle [PATH:ko04721]	3	2.55115
	Axon regeneration [PATH:ko04361]	5	3.4726
	Plant-pathogen interaction [PATH:ko04626]	11	5.02123
	Circadian rhythm - plant [PATH:ko04712]	3	3.606
	Thermogenesis [PATH:ko04714]	3	4.25505

## Sheet: Table S17
Supplementary Table 17. GO analysis based on DEGs (Roots vs. Flowers).
Cutoff: BaseMean > 50, log2FC > 2, pvalue < 0.01, padj < 0.01, Number of unigenes assigned ≥ 3.
Set	GO information (biological process)	Number of unigenes assigned	FC average
Set-1	amino acid transmembrane transport_GO:0003333	3	4.19873
	aromatic compound biosynthetic process_GO:0019438	3	5.6721
	carbohydrate metabolic process_GO:0005975	9	2.89084
	carbohydrate transport_GO:0008643	7	3.16132
	cellular amino acid metabolic process_GO:0006520	4	2.58648
	cellulose microfibril organization_GO:0010215	3	2.70105
	coumarin biosynthetic process_GO:0009805	7	2.79298
	fatty acid biosynthetic process_GO:0006633	5	4.57757
	flavonoid biosynthetic process_GO:0009813	4	5.2121
	fructose metabolic process_GO:0006000	4	4.12382
	galactose metabolic process_GO:0006012	3	3.61948
	gibberellin biosynthetic process_GO:0009686	4	5.27468
	lignan biosynthetic process_GO:0009807	3	3.03453
	MAPK cascade_GO:0000165	4	3.69169
	metal ion transport_GO:0030001	3	3.02237
	mitochondrial fission_GO:0000266	3	2.50219
	mRNA splicing, via spliceosome_GO:0000398	8	2.71694
	obsolete acyl-carrier-protein biosynthetic process_GO:0042967	4	2.96837
	protein localization_GO:0008104	3	4.21533
	protein peptidyl-prolyl isomerization_GO:0000413	4	4.42855
	regulation of alternative mRNA splicing, via spliceosome_GO:0000381	4	2.53827
	response to stress; response to abiotic stimulus_GO:0006950	3	4.45998
	response to water_GO:0009415	3	3.07196
	RNA modification_GO:0009451	3	2.72613
	signal transduction_GO:0007165	8	3.46718
	starch metabolic process_GO:0005982	9	3.21398
	tryptophan biosynthetic process_GO:0000162	3	2.76266
	xenobiotic transmembrane transport_GO:0006855	12	5.33594
Set-2	amino acid transmembrane transport_GO:0003333	6	3.2654
	aromatic compound biosynthetic process_GO:0019438	3	5.76699
	carbohydrate metabolic process_GO:0005975	8	3.52957
	carbohydrate transport_GO:0008643	4	4.116
	cellular amino acid metabolic process_GO:0006520	3	2.72487
	coumarin biosynthetic process_GO:0009805	8	2.81478
	cytokinin metabolic process_GO:0009690	3	2.83878
	defense response_GO:0006952	5	3.85123
	fatty acid biosynthetic process_GO:0006633	5	4.46426
	flavonoid biosynthetic process_GO:0009813	5	5.06487
	fructose metabolic process_GO:0006000	3	6.04924
	galactose metabolic process_GO:0006012	7	5.03982
	indole biosynthetic process_GO:0042432	4	2.44813
	lipid metabolic process_GO:0006629	8	3.49029
	MAPK cascade_GO:0000165	7	3.81253
	metal ion transport_GO:0030001	9	3.24674
	microtubule cytoskeleton organization_GO:0000226	3	2.3945
	mRNA splicing, via spliceosome_GO:0000398	9	2.82689
	nitric oxide biosynthetic process_GO:0006809	4	9.66103
	nitrogen compound metabolic process_GO:0006807	3	4.91976
	obsolete acyl-carrier-protein biosynthetic process_GO:0042967	3	2.34691
	obsolete electron transport; F:electron transfer activity_GO:0006118	6	5.37009
	phosphorelay signal transduction system_GO:0000160	3	3.88887
	protein glycosylation_GO:0006486	4	3.83117
	protein transport_GO:0015031	4	2.59708
	regulation of alternative mRNA splicing, via spliceosome_GO:0000381	3	2.44438
	regulation of DNA-templated transcription_GO:0006355	3	3.24398
	response to auxin_GO:0009733	4	5.55312
	ribosomal small subunit assembly_GO:0000028	3	2.77482
	RNA modification_GO:0009451	4	4.2345
	signal transduction_GO:0007165	13	2.93746
	starch metabolic process_GO:0005982	10	3.6698
	ubiquitin-dependent protein catabolic process_GO:0006511	4	6.06777
	xenobiotic transmembrane transport_GO:0006855	11	5.8233
Set-3	alanine metabolic process_GO:0006522	3	3.81962
	amino acid transmembrane transport_GO:0003333	4	3.39738
	aromatic compound biosynthetic process_GO:0019438	3	7.40578
	carbohydrate metabolic process_GO:0005975	7	3.44037
	carbohydrate transport_GO:0008643	4	3.2604
	cellular aldehyde metabolic process_GO:0006081	3	2.90278
	cellular amino acid metabolic process_GO:0006520	3	2.90457
	cellulose microfibril organization_GO:0010215	3	2.57074
	coumarin biosynthetic process_GO:0009805	10	2.51054
	defense response_GO:0006952	3	3.00656
	fatty acid biosynthetic process_GO:0006633	6	5.13928
	flavonoid biosynthetic process_GO:0009813	8	3.38373
	fructose metabolic process_GO:0006000	3	3.51534
	galactose metabolic process_GO:0006012	3	4.0655
	glycosphingolipid metabolic process_GO:0006687	3	2.36646
	indole biosynthetic process_GO:0042432	4	2.45678
	lipid transport_GO:0006869	5	2.82171
	MAPK cascade_GO:0000165	3	3.16924
	metal ion transport_GO:0030001	9	3.30153
	mRNA splicing, via spliceosome_GO:0000398	10	2.63744
	nucleic acid metabolic process_GO:0090304	3	11.2432
	obsolete acyl-carrier-protein biosynthetic process_GO:0042967	4	3.72227
	obsolete electron transport; F:electron transfer activity_GO:0006118	8	5.13671
	protein glycosylation_GO:0006486	4	3.71387
	protein localization_GO:0008104	3	3.10672
	protein peptidyl-prolyl isomerization_GO:0000413	3	4.4349
	protein transport_GO:0015031	3	2.12555
	response to auxin_GO:0009733	3	4.2486
	signal transduction_GO:0007165	14	3.54913
	starch metabolic process_GO:0005982	10	3.79164
	taurine metabolic process_GO:0019530	3	5.00387
	tryptophan biosynthetic process_GO:0000162	3	2.89484
	ubiquitin-dependent protein catabolic process_GO:0006511	4	4.07386
	vesicle docking involved in exocytosis_GO:0006904	3	2.3874
	xenobiotic transmembrane transport_GO:0006855	15	5.16975

## Sheet: Table S18
Supplementary Table 18. KEGG analysis based on DEGs (Roots vs. Flowers).
Cutoff: BaseMean > 50, log2FC > 2, pvalue < 0.01, padj < 0.01, Number of unigenes assigned ≥ 3.
Set	KEGG information	Number of unigenes assigned	FC average
Set-1	Glycolysis / Gluconeogenesis [PATH:ko00010]	33	4.35678
	Pentose phosphate pathway [PATH:ko00030]	3	2.50462
	Pentose and glucuronate interconversions [PATH:ko00040]	9	4.52045
	Fructose and mannose metabolism [PATH:ko00051]	6	3.6182
	Galactose metabolism [PATH:ko00052]	6	3.56992
	Ascorbate and aldarate metabolism [PATH:ko00053]	5	3.77568
	Starch and sucrose metabolism [PATH:ko00500]	9	3.33158
	Amino sugar and nucleotide sugar metabolism [PATH:ko00520]	3	3.30119
	Pyruvate metabolism [PATH:ko00620]	4	3.05946
	Butanoate metabolism [PATH:ko00650]	3	3.44394
	Nitrogen metabolism [PATH:ko00910]	7	4.31718
	Sulfur metabolism [PATH:ko00920]	3	2.42819
	Fatty acid biosynthesis [PATH:ko00061]	8	4.31055
	Glycerophospholipid metabolism [PATH:ko00564]	6	2.63471
	Arachidonic acid metabolism [PATH:ko00590]	4	3.81351
	alpha-Linolenic acid metabolism [PATH:ko00592]	3	2.39508
	Sphingolipid metabolism [PATH:ko00600]	4	2.74876
	Purine metabolism [PATH:ko00230]	6	2.74946
	Alanine, aspartate and glutamate metabolism [PATH:ko00250]	3	3.15892
	Glycine, serine and threonine metabolism [PATH:ko00260]	5	4.53361
	Cysteine and methionine metabolism [PATH:ko00270]	18	3.66595
	Phenylalanine, tyrosine and tryptophan biosynthesis [PATH:ko00400]	3	2.76266
	Glutathione metabolism [PATH:ko00480]	12	3.0789
	Ubiquinone and other terpenoid-quinone biosynthesis [PATH:ko00130]	5	3.84485
	Porphyrin metabolism [PATH:ko00860]	3	2.22742
	Diterpenoid biosynthesis [PATH:ko00904]	4	5.27468
	Zeatin biosynthesis [PATH:ko00908]	4	4.61313
	Phenylpropanoid biosynthesis [PATH:ko00940]	22	4.09567
	Flavonoid biosynthesis [PATH:ko00941]	5	4.39809
	Isoflavonoid biosynthesis [PATH:ko00943]	10	2.97369
	Tropane, piperidine and pyridine alkaloid biosynthesis [PATH:ko00960]	3	2.92484
	Biosynthesis of various plant secondary metabolites [PATH:ko00999]	6	3.43816
	RNA polymerase [PATH:ko03020]	10	2.27292
	Spliceosome [PATH:ko03040]	33	2.7562
	Ribosome biogenesis in eukaryotes [PATH:ko03008]	6	2.73095
	Ribosome [PATH:ko03010]	5	2.6512
	Nucleocytoplasmic transport [PATH:ko03013]	13	3.41473
	mRNA surveillance pathway [PATH:ko03015]	15	2.6456
	RNA degradation [PATH:ko03018]	7	3.98524
	Ubiquitin mediated proteolysis [PATH:ko04120]	6	2.89131
	SNARE interactions in vesicular transport [PATH:ko04130]	7	2.64852
	Protein processing in endoplasmic reticulum [PATH:ko04141]	12	3.13059
	ABC transporters [PATH:ko02010]	5	2.844
	MAPK signaling pathway - plant [PATH:ko04016]	24	3.3275
	Plant hormone signal transduction [PATH:ko04075]	12	5.15521
	Lysosome [PATH:ko04142]	4	3.59161
	Endocytosis [PATH:ko04144]	6	2.53969
	Cell cycle [PATH:ko04110]	6	2.59573
	NOD-like receptor signaling pathway [PATH:ko04621]	3	2.64225
	Plant-pathogen interaction [PATH:ko04626]	12	3.01413
	Thermogenesis [PATH:ko04714]	3	3.15912
Set-2	Glycolysis / Gluconeogenesis [PATH:ko00010]	41	4.60226
	Pentose phosphate pathway [PATH:ko00030]	4	2.25102
	Pentose and glucuronate interconversions [PATH:ko00040]	10	5.07934
	Fructose and mannose metabolism [PATH:ko00051]	4	5.31034
	Galactose metabolism [PATH:ko00052]	14	4.69976
	Ascorbate and aldarate metabolism [PATH:ko00053]	3	4.69387
	Starch and sucrose metabolism [PATH:ko00500]	13	4.30002
	Amino sugar and nucleotide sugar metabolism [PATH:ko00520]	6	3.77567
	Inositol phosphate metabolism [PATH:ko00562]	4	2.67866
	Pyruvate metabolism [PATH:ko00620]	6	2.87864
	Butanoate metabolism [PATH:ko00650]	3	2.67057
	Oxidative phosphorylation [PATH:ko00190]	7	3.95594
	Nitrogen metabolism [PATH:ko00910]	8	6.44157
	Sulfur metabolism [PATH:ko00920]	3	2.57347
	Fatty acid biosynthesis [PATH:ko00061]	3	5.55706
	Steroid biosynthesis [PATH:ko00100]	3	2.62363
	Glycerolipid metabolism [PATH:ko00561]	3	4.22813
	Glycerophospholipid metabolism [PATH:ko00564]	7	5.5751
	Arachidonic acid metabolism [PATH:ko00590]	5	4.91255
	alpha-Linolenic acid metabolism [PATH:ko00592]	3	2.28747
	Sphingolipid metabolism [PATH:ko00600]	3	2.83143
	Purine metabolism [PATH:ko00230]	4	2.41624
	Alanine, aspartate and glutamate metabolism [PATH:ko00250]	5	4.80348
	Glycine, serine and threonine metabolism [PATH:ko00260]	7	4.47412
	Cysteine and methionine metabolism [PATH:ko00270]	11	4.03218
	Glutathione metabolism [PATH:ko00480]	13	3.54648
	Various types of N-glycan biosynthesis [PATH:ko00513]	3	2.15337
	Ubiquinone and other terpenoid-quinone biosynthesis [PATH:ko00130]	6	4.59176
	Thiamine metabolism [PATH:ko00730]	4	3.12037
	Diterpenoid biosynthesis [PATH:ko00904]	3	4.89283
	Zeatin biosynthesis [PATH:ko00908]	5	4.05749
	Phenylpropanoid biosynthesis [PATH:ko00940]	27	4.72718
	Flavonoid biosynthesis [PATH:ko00941]	9	4.8239
	Isoflavonoid biosynthesis [PATH:ko00943]	8	3.73253
	Tropane, piperidine and pyridine alkaloid biosynthesis [PATH:ko00960]	3	2.56954
	Biosynthesis of various plant secondary metabolites [PATH:ko00999]	4	2.74412
	RNA polymerase [PATH:ko03020]	16	2.7202
	Basal transcription factors [PATH:ko03022]	4	3.5942
	Spliceosome [PATH:ko03040]	24	3.47784
	Ribosome biogenesis in eukaryotes [PATH:ko03008]	11	2.44333
	Ribosome [PATH:ko03010]	9	3.50142
	Nucleocytoplasmic transport [PATH:ko03013]	18	3.22021
	mRNA surveillance pathway [PATH:ko03015]	9	2.31143
	RNA degradation [PATH:ko03018]	8	2.87298
	Ubiquitin mediated proteolysis [PATH:ko04120]	11	3.56504
	SNARE interactions in vesicular transport [PATH:ko04130]	8	2.61973
	Protein processing in endoplasmic reticulum [PATH:ko04141]	18	4.55214
	Homologous recombination [PATH:ko03440]	4	2.68966
	ABC transporters [PATH:ko02010]	8	3.07505
	MAPK signaling pathway [PATH:ko04010]	3	2.56849
	MAPK signaling pathway - plant [PATH:ko04016]	32	3.57619
	Plant hormone signal transduction [PATH:ko04075]	24	5.20474
	Wnt signaling pathway [PATH:ko04310]	3	2.54808
	animal [PATH:ko04137]	3	2.48724
	Lysosome [PATH:ko04142]	5	3.91105
	Endocytosis [PATH:ko04144]	7	2.48319
	Peroxisome [PATH:ko04146]	6	2.54813
	Cell cycle [PATH:ko04110]	3	2.41272
	Antigen processing and presentation [PATH:ko04612]	3	2.92324
	Progesterone-mediated oocyte maturation [PATH:ko04914]	3	2.09198
	Axon regeneration [PATH:ko04361]	4	5.26828
	Plant-pathogen interaction [PATH:ko04626]	20	3.40073
	Thermogenesis [PATH:ko04714]	3	3.74824
Set-3	Glycolysis / Gluconeogenesis [PATH:ko00010]	38	4.39011
	Pentose phosphate pathway [PATH:ko00030]	5	2.31022
	Pentose and glucuronate interconversions [PATH:ko00040]	9	4.46091
	Fructose and mannose metabolism [PATH:ko00051]	5	3.14437
	Galactose metabolism [PATH:ko00052]	7	4.18233
	Ascorbate and aldarate metabolism [PATH:ko00053]	4	3.81761
	Starch and sucrose metabolism [PATH:ko00500]	8	3.32174
	Amino sugar and nucleotide sugar metabolism [PATH:ko00520]	7	3.27441
	Inositol phosphate metabolism [PATH:ko00562]	4	2.60493
	Pyruvate metabolism [PATH:ko00620]	6	4.29287
	Glyoxylate and dicarboxylate metabolism [PATH:ko00630]	3	2.24962
	Oxidative phosphorylation [PATH:ko00190]	5	5.99659
	Nitrogen metabolism [PATH:ko00910]	6	5.78923
	Sulfur metabolism [PATH:ko00920]	5	2.53769
	Fatty acid biosynthesis [PATH:ko00061]	5	6.60139
	Glycerolipid metabolism [PATH:ko00561]	6	3.11837
	Glycerophospholipid metabolism [PATH:ko00564]	3	3.2547
	Arachidonic acid metabolism [PATH:ko00590]	3	3.95206
	Sphingolipid metabolism [PATH:ko00600]	4	2.72826
	Purine metabolism [PATH:ko00230]	3	4.39614
	Alanine, aspartate and glutamate metabolism [PATH:ko00250]	4	3.53374
	Glycine, serine and threonine metabolism [PATH:ko00260]	8	4.9544
	Cysteine and methionine metabolism [PATH:ko00270]	12	3.73254
	Tryptophan metabolism [PATH:ko00380]	4	2.4619
	Phenylalanine, tyrosine and tryptophan biosynthesis [PATH:ko00400]	3	2.89484
	Glutathione metabolism [PATH:ko00480]	15	3.35093
	Glycosylphosphatidylinositol (GPI)-anchor biosynthesis [PATH:ko00563]	3	2.09085
	Ubiquinone and other terpenoid-quinone biosynthesis [PATH:ko00130]	10	3.65938
	Thiamine metabolism [PATH:ko00730]	3	3.52018
	Carotenoid biosynthesis [PATH:ko00906]	3	5.15355
	Zeatin biosynthesis [PATH:ko00908]	5	4.2591
	Phenylpropanoid biosynthesis [PATH:ko00940]	23	4.20514
	Flavonoid biosynthesis [PATH:ko00941]	11	3.05642
	Isoflavonoid biosynthesis [PATH:ko00943]	7	3.42196
	Biosynthesis of various plant secondary metabolites [PATH:ko00999]	6	3.29255
	RNA polymerase [PATH:ko03020]	15	3.22949
	Basal transcription factors [PATH:ko03022]	4	4.56228
	Spliceosome [PATH:ko03040]	25	2.83289
	Ribosome biogenesis in eukaryotes [PATH:ko03008]	5	2.68946
	Ribosome [PATH:ko03010]	6	3.84678
	Nucleocytoplasmic transport [PATH:ko03013]	13	3.23539
	mRNA surveillance pathway [PATH:ko03015]	11	3.04961
	RNA degradation [PATH:ko03018]	6	3.71821
	Proteasome [PATH:ko03050]	3	3.45771
	Ubiquitin mediated proteolysis [PATH:ko04120]	8	3.05382
	SNARE interactions in vesicular transport [PATH:ko04130]	7	2.73177
	Protein processing in endoplasmic reticulum [PATH:ko04141]	15	3.63395
	MAPK signaling pathway [PATH:ko04010]	3	2.83804
	MAPK signaling pathway - plant [PATH:ko04016]	27	3.34043
	FoxO signaling pathway [PATH:ko04068]	3	2.98617
	Plant hormone signal transduction [PATH:ko04075]	19	4.82406
	Autophagy - animal [PATH:ko04140]	3	4.72417
	Lysosome [PATH:ko04142]	3	3.22581
	Endocytosis [PATH:ko04144]	5	4.73541
	Peroxisome [PATH:ko04146]	4	2.2236
	Regulation of actin cytoskeleton [PATH:ko04810]	4	2.92787
	Antigen processing and presentation [PATH:ko04612]	3	3.54194
	Synaptic vesicle cycle [PATH:ko04721]	3	2.3874
	Axon regeneration [PATH:ko04361]	3	3.02509
	Plant-pathogen interaction [PATH:ko04626]	21	4.13612

## Sheet: Table S19
Supplementary Table 19. GO analysis based on DEGs (Roots vs. Stems).
Cutoff: BaseMean > 50, log2FC > 2, pvalue < 0.01, padj < 0.01, Number of unigenes assigned ≥ 3.
Set	GO information (biological process)	Number of unigenes assigned	FC average
Set-1	amino acid transmembrane transport_GO:0003333	8	2.7549
	aromatic compound biosynthetic process_GO:0019438	3	5.21419
	carbohydrate metabolic process_GO:0005975	8	3.8553
	carbohydrate transport_GO:0008643	4	3.44426
	cellular amino acid metabolic process_GO:0006520	3	5.95717
	coumarin biosynthetic process_GO:0009805	6	2.44522
	dephosphorylation_GO:0016311	3	2.53684
	flavonoid biosynthetic process_GO:0009813	5	4.48992
	fructose metabolic process_GO:0006000	4	4.97078
	gibberellin biosynthetic process_GO:0009686	3	5.79205
	glycerol metabolic process_GO:0006071	3	3.47237
	indole biosynthetic process_GO:0042432	3	3.23384
	metal ion transport_GO:0030001	4	2.95791
	mRNA splicing, via spliceosome_GO:0000398	6	4.15521
	negative regulation of transcription by RNA polymerase II_GO:0000122	3	2.31083
	obsolete acyl-carrier-protein biosynthetic process_GO:0042967	5	5.1356
	obsolete electron transport_GO:0006118	4	3.29407
	protein peptidyl-prolyl isomerization_GO:0000413	4	4.4337
	regulation of alternative mRNA splicing, via spliceosome_GO:0000381	3	2.73753
	starch metabolic process_GO:0005982	16	3.45384
	xenobiotic transmembrane transport_GO:0006855	13	5.83167
Set-2	alanine metabolic process_GO:0006522	3	5.02154
	amino acid transmembrane transport_GO:0003333	10	3.16187
	aromatic compound biosynthetic process_GO:0019438	3	5.30393
	carbohydrate metabolic process_GO:0005975	11	5.20249
	carbohydrate transport_GO:0008643	3	3.36443
	catabolic process_GO:0009056	3	3.65243
	cellular amino acid metabolic process_GO:0006520	4	5.85662
	coumarin biosynthetic process_GO:0009805	4	2.29167
	dephosphorylation_GO:0016311	3	2.60086
	flavonoid biosynthetic process_GO:0009813	8	4.46134
	fructose metabolic process_GO:0006000	3	7.43041
	indole biosynthetic process_GO:0042432	4	3.34954
	MAPK cascade_GO:0000165	3	2.75854
	metal ion transport_GO:0030001	7	3.41046
	mRNA splicing, via spliceosome_GO:0000398	5	2.94534
	nitric oxide biosynthetic process_GO:0006809	4	8.31708
	obsolete acyl-carrier-protein biosynthetic process_GO:0042967	3	3.91691
	obsolete electron transport_GO:0006118	11	4.4849
	protein peptidyl-prolyl isomerization_GO:0000413	4	3.53661
	protein transport_GO:0015031	3	2.23603
	proteolysis_GO:0006508	3	3.28078
	response to auxin_GO:0009733	3	4.53122
	RNA modification_GO:0009451	3	4.35597
	signal transduction_GO:0007165	3	2.87901
	starch metabolic process_GO:0005982	13	3.91866
	xenobiotic transmembrane transport_GO:0006855	9	6.7579
Set-3	alanine metabolic process_GO:0006522	3	4.38469
	amino acid transmembrane transport_GO:0003333	9	3.07064
	carbohydrate metabolic process_GO:0005975	5	3.42636
	carbohydrate transport_GO:0008643	4	3.63325
	catabolic process_GO:0009056	4	3.28213
	cellular amino acid metabolic process_GO:0006520	3	5.76385
	coumarin biosynthetic process_GO:0009805	4	2.19238
	cytokinin metabolic process_GO:0009690	3	3.8595
	defense response to bacterium_GO:0042742	3	4.22552
	dephosphorylation_GO:0016311	3	2.51051
	fatty acid biosynthetic process_GO:0006633	3	7.21002
	flavonoid biosynthetic process_GO:0009813	11	3.92603
	indole biosynthetic process_GO:0042432	3	3.63131
	metal ion transport_GO:0030001	7	3.86353
	mRNA splicing, via spliceosome_GO:0000398	7	2.88783
	nucleic acid metabolic process_GO:0090304	3	5.225
	obsolete acyl-carrier-protein biosynthetic process_GO:0042967	6	4.39805
	obsolete electron transport_GO:0006118	12	4.93535
	protein peptidyl-prolyl isomerization_GO:0000413	4	3.85692
	proteolysis_GO:0006508	3	5.60047
	signal transduction_GO:0007165	3	4.45079
	starch metabolic process_GO:0005982	12	3.85415
	taurine metabolic process_GO:0019530	3	4.63983
	xenobiotic transmembrane transport_GO:0006855	16	5.12791

## Sheet: Table S20
Supplementary Table 20. KEGG analysis based on DEGs (Roots vs. Stems).
Cutoff: BaseMean > 50, log2FC > 2, pvalue < 0.01, padj < 0.01, Number of unigenes assigned ≥ 3.
Set	KEGG information	Number of unigenes assigned	FC average
Set-1	Glycolysis / Gluconeogenesis [PATH:ko00010]	34	4.79444
	Pentose phosphate pathway [PATH:ko00030]	6	2.53097
	Pentose and glucuronate interconversions [PATH:ko00040]	9	7.34611
	Fructose and mannose metabolism [PATH:ko00051]	8	3.82979
	Galactose metabolism [PATH:ko00052]	8	4.28859
	Ascorbate and aldarate metabolism [PATH:ko00053]	5	7.31794
	Starch and sucrose metabolism [PATH:ko00500]	16	3.84949
	Amino sugar and nucleotide sugar metabolism [PATH:ko00520]	5	3.88909
	Inositol phosphate metabolism [PATH:ko00562]	3	2.46866
	Pyruvate metabolism [PATH:ko00620]	3	3.20031
	Glyoxylate and dicarboxylate metabolism [PATH:ko00630]	8	2.51755
	Nitrogen metabolism [PATH:ko00910]	7	4.07857
	Fatty acid biosynthesis [PATH:ko00061]	4	4.81144
	Steroid biosynthesis [PATH:ko00100]	6	2.7524
	Glycerophospholipid metabolism [PATH:ko00564]	12	2.85984
	Arachidonic acid metabolism [PATH:ko00590]	4	3.07974
	alpha-Linolenic acid metabolism [PATH:ko00592]	5	4.44779
	Sphingolipid metabolism [PATH:ko00600]	5	2.72567
	Purine metabolism [PATH:ko00230]	5	3.07385
	Alanine, aspartate and glutamate metabolism [PATH:ko00250]	3	3.69249
	Cysteine and methionine metabolism [PATH:ko00270]	12	4.59842
	Valine, leucine and isoleucine degradation [PATH:ko00280]	4	3.8799
	Arginine and proline metabolism [PATH:ko00330]	3	4.31339
	Tryptophan metabolism [PATH:ko00380]	5	3.8734
	Glutathione metabolism [PATH:ko00480]	13	3.65973
	Ubiquinone and other terpenoid-quinone biosynthesis [PATH:ko00130]	3	4.0501
	Diterpenoid biosynthesis [PATH:ko00904]	3	5.79205
	Zeatin biosynthesis [PATH:ko00908]	6	4.42297
	Phenylpropanoid biosynthesis [PATH:ko00940]	18	4.11266
	Flavonoid biosynthesis [PATH:ko00941]	10	3.23775
	Isoflavonoid biosynthesis [PATH:ko00943]	7	3.33843
	Biosynthesis of various plant secondary metabolites [PATH:ko00999]	6	5.49963
	RNA polymerase [PATH:ko03020]	3	2.2537
	Spliceosome [PATH:ko03040]	29	2.59585
	Ribosome biogenesis in eukaryotes [PATH:ko03008]	8	2.20573
	Ribosome [PATH:ko03010]	3	4.71682
	Nucleocytoplasmic transport [PATH:ko03013]	11	3.2624
	mRNA surveillance pathway [PATH:ko03015]	9	2.47605
	RNA degradation [PATH:ko03018]	5	4.98538
	Ubiquitin mediated proteolysis [PATH:ko04120]	4	2.70481
	SNARE interactions in vesicular transport [PATH:ko04130]	5	2.63924
	Protein processing in endoplasmic reticulum [PATH:ko04141]	10	2.6216
	ABC transporters [PATH:ko02010]	6	2.30554
	MAPK signaling pathway - plant [PATH:ko04016]	12	3.46268
	Plant hormone signal transduction [PATH:ko04075]	7	4.01925
	Wnt signaling pathway [PATH:ko04310]	3	3.33064
	Hedgehog signaling pathway [PATH:ko04340]	3	2.84167
	Lysosome [PATH:ko04142]	4	3.74418
	Endocytosis [PATH:ko04144]	3	2.51149
	Peroxisome [PATH:ko04146]	4	2.9648
	Protein digestion and absorption [PATH:ko04974]	3	2.32338
	Plant-pathogen interaction [PATH:ko04626]	10	3.2144
	Thermogenesis [PATH:ko04714]	3	2.71572
Set-2	Glycolysis / Gluconeogenesis [PATH:ko00010]	42	4.45526
	Pentose phosphate pathway [PATH:ko00030]	7	3.1923
	Pentose and glucuronate interconversions [PATH:ko00040]	10	7.16245
	Fructose and mannose metabolism [PATH:ko00051]	5	5.71848
	Galactose metabolism [PATH:ko00052]	9	4.66882
	Ascorbate and aldarate metabolism [PATH:ko00053]	6	7.35733
	Starch and sucrose metabolism [PATH:ko00500]	25	4.61805
	Amino sugar and nucleotide sugar metabolism [PATH:ko00520]	9	3.63011
	Inositol phosphate metabolism [PATH:ko00562]	3	2.42495
	Glyoxylate and dicarboxylate metabolism [PATH:ko00630]	8	2.74226
	Propanoate metabolism [PATH:ko00640]	5	4.15765
	Oxidative phosphorylation [PATH:ko00190]	6	4.31062
	Nitrogen metabolism [PATH:ko00910]	11	4.92651
	Sulfur metabolism [PATH:ko00920]	3	2.36195
	Fatty acid biosynthesis [PATH:ko00061]	4	4.92282
	Fatty acid degradation [PATH:ko00071]	5	2.69966
	Cutin, suberine and wax biosynthesis [PATH:ko00073]	3	3.77643
	Steroid biosynthesis [PATH:ko00100]	5	3.05464
	Glycerolipid metabolism [PATH:ko00561]	4	3.36869
	Glycerophospholipid metabolism [PATH:ko00564]	7	2.96479
	Arachidonic acid metabolism [PATH:ko00590]	4	4.38838
	alpha-Linolenic acid metabolism [PATH:ko00592]	6	4.40688
	Sphingolipid metabolism [PATH:ko00600]	3	2.73289
	Purine metabolism [PATH:ko00230]	7	2.74532
	Alanine, aspartate and glutamate metabolism [PATH:ko00250]	6	4.55739
	Glycine, serine and threonine metabolism [PATH:ko00260]	3	2.49688
	Cysteine and methionine metabolism [PATH:ko00270]	10	5.95062
	Arginine and proline metabolism [PATH:ko00330]	5	4.23317
	Glutathione metabolism [PATH:ko00480]	16	3.98601
	Ubiquinone and other terpenoid-quinone biosynthesis [PATH:ko00130]	4	4.49937
	Lipoic acid metabolism [PATH:ko00785]	5	2.67561
	Diterpenoid biosynthesis [PATH:ko00904]	3	5.9872
	Zeatin biosynthesis [PATH:ko00908]	5	4.28839
	Phenylpropanoid biosynthesis [PATH:ko00940]	18	3.80983
	Flavonoid biosynthesis [PATH:ko00941]	16	3.53696
	Isoflavonoid biosynthesis [PATH:ko00943]	8	3.99397
	Biosynthesis of various plant secondary metabolites [PATH:ko00999]	3	4.08685
	RNA polymerase [PATH:ko03020]	6	2.99973
	Spliceosome [PATH:ko03040]	17	3.20443
	Ribosome biogenesis in eukaryotes [PATH:ko03008]	8	2.37032
	Ribosome [PATH:ko03010]	6	6.5301
	Nucleocytoplasmic transport [PATH:ko03013]	18	3.23884
	mRNA surveillance pathway [PATH:ko03015]	6	3.11845
	RNA degradation [PATH:ko03018]	5	2.43459
	Ubiquitin mediated proteolysis [PATH:ko04120]	8	3.76165
	SNARE interactions in vesicular transport [PATH:ko04130]	6	2.30346
	Protein processing in endoplasmic reticulum [PATH:ko04141]	17	4.29311
	Homologous recombination [PATH:ko03440]	3	4.22994
	ABC transporters [PATH:ko02010]	13	2.61343
	MAPK signaling pathway [PATH:ko04010]	3	2.60386
	MAPK signaling pathway - plant [PATH:ko04016]	17	3.71226
	Calcium signaling pathway [PATH:ko04020]	3	5.24822
	Plant hormone signal transduction [PATH:ko04075]	8	5.53386
	Wnt signaling pathway [PATH:ko04310]	4	3.55687
	Autophagy - animal [PATH:ko04140]	3	2.8762
	Lysosome [PATH:ko04142]	7	3.26669
	Peroxisome [PATH:ko04146]	3	2.2416
	Axon regeneration [PATH:ko04361]	3	3.81102
	Plant-pathogen interaction [PATH:ko04626]	10	4.75434
	Thermogenesis [PATH:ko04714]	3	3.24003
Set-3	Glycolysis / Gluconeogenesis [PATH:ko00010]	38	4.6793
	Pentose phosphate pathway [PATH:ko00030]	7	3.44047
	Pentose and glucuronate interconversions [PATH:ko00040]	9	8.49837
	Fructose and mannose metabolism [PATH:ko00051]	5	3.92437
	Galactose metabolism [PATH:ko00052]	11	4.55565
	Ascorbate and aldarate metabolism [PATH:ko00053]	5	7.1636
	Starch and sucrose metabolism [PATH:ko00500]	19	3.83146
	Amino sugar and nucleotide sugar metabolism [PATH:ko00520]	10	3.84983
	Inositol phosphate metabolism [PATH:ko00562]	6	2.37129
	Glyoxylate and dicarboxylate metabolism [PATH:ko00630]	7	2.46426
	Propanoate metabolism [PATH:ko00640]	6	4.22149
	Oxidative phosphorylation [PATH:ko00190]	5	6.62702
	Nitrogen metabolism [PATH:ko00910]	7	4.84233
	Fatty acid biosynthesis [PATH:ko00061]	7	5.29606
	Steroid biosynthesis [PATH:ko00100]	4	2.71745
	Glycerolipid metabolism [PATH:ko00561]	4	3.34165
	Glycerophospholipid metabolism [PATH:ko00564]	5	3.04137
	Arachidonic acid metabolism [PATH:ko00590]	3	2.81438
	alpha-Linolenic acid metabolism [PATH:ko00592]	5	3.43255
	Sphingolipid metabolism [PATH:ko00600]	4	2.94258
	Purine metabolism [PATH:ko00230]	6	2.96208
	Alanine, aspartate and glutamate metabolism [PATH:ko00250]	4	4.16539
	Glycine, serine and threonine metabolism [PATH:ko00260]	4	4.27782
	Cysteine and methionine metabolism [PATH:ko00270]	11	5.65505
	Arginine and proline metabolism [PATH:ko00330]	3	4.89211
	Tryptophan metabolism [PATH:ko00380]	4	4.36521
	Glutathione metabolism [PATH:ko00480]	15	4.05318
	Ubiquinone and other terpenoid-quinone biosynthesis [PATH:ko00130]	4	4.5676
	Zeatin biosynthesis [PATH:ko00908]	8	4.13336
	Phenylpropanoid biosynthesis [PATH:ko00940]	21	4.56295
	Flavonoid biosynthesis [PATH:ko00941]	16	3.38445
	Isoflavonoid biosynthesis [PATH:ko00943]	10	3.53294
	Biosynthesis of various plant secondary metabolites [PATH:ko00999]	8	4.71366
	RNA polymerase [PATH:ko03020]	8	4.80522
	Spliceosome [PATH:ko03040]	24	2.71593
	Ribosome biogenesis in eukaryotes [PATH:ko03008]	3	4.18384
	Ribosome [PATH:ko03010]	6	9.78192
	Nucleocytoplasmic transport [PATH:ko03013]	19	3.57931
	mRNA surveillance pathway [PATH:ko03015]	8	3.59294
	RNA degradation [PATH:ko03018]	4	3.11119
	Ubiquitin mediated proteolysis [PATH:ko04120]	4	3.3176
	SNARE interactions in vesicular transport [PATH:ko04130]	4	2.52784
	Protein processing in endoplasmic reticulum [PATH:ko04141]	15	2.72034
	Homologous recombination [PATH:ko03440]	3	5.21049
	ABC transporters [PATH:ko02010]	3	2.42909
	MAPK signaling pathway [PATH:ko04010]	4	3.51123
	ErbB signaling pathway [PATH:ko04012]	3	3.57035
	MAPK signaling pathway - plant [PATH:ko04016]	17	3.41092
	Calcium signaling pathway [PATH:ko04020]	3	4.12926
	FoxO signaling pathway [PATH:ko04068]	4	2.62622
	Plant hormone signal transduction [PATH:ko04075]	9	5.31398
	Wnt signaling pathway [PATH:ko04310]	3	5.78851
	Autophagy - animal [PATH:ko04140]	3	3.95596
	Lysosome [PATH:ko04142]	3	3.18364
	Endocytosis [PATH:ko04144]	4	2.828
	Peroxisome [PATH:ko04146]	3	2.31948
	Regulation of actin cytoskeleton [PATH:ko04810]	3	3.0959
	Protein digestion and absorption [PATH:ko04974]	3	2.22915
	Plant-pathogen interaction [PATH:ko04626]	14	4.59079

## Sheet: Table S21
Supplementary Table 21. GO and KEGG annotation and analysis of DEGs (Set-1).
Unigene ID	GO information		KEGG information			DEG (Roots vs. Leaves)						DEG (Roots vs. Flowers)						DEG (Roots vs. Stems)						Read Count
	GO ID	GO Name	KO	KO Description	Pathway Description	BaseMean	log2FC	lfcSE	stat	pvalue	padj	BaseMean	log2 FC	lfcSE	Stat	pvalue	padj	BaseMean	log2 FC	lfcSE	Stat	pvalue	padj	Roots-1	Roots-2	Roots-3	Leaves-1	Leaves-2	Leaves-3	Flowers-1	Flowers-2	Flowers-3	Stems-1	Stems-2	Stems-3
Am_HQ_0	C:GO:0005737; P:GO:0016567; F:GO:0061630	C:cytoplasm; P:protein ubiquitination; F:ubiquitin protein ligase activity	K10592	HUWE1, MULE, ARF-BP1; E3 ubiquitin-protein ligase HUWE1 [EC:2.3.2.26]	A 9120 Genetic Information Processing; B 09123 Folding, sorting and degradation; C 04120 Ubiquitin mediated proteolysis [PATH:ko04120]	3430.54	0.0740505	0.238405	0.310607	0.756099	0.818708	3430.54	0.348841	0.238487	1.46273	0.143542	0.210372	3430.54	0.3295	0.238472	1.38172	0.167058	0.257599	3310	2943	3134	3899	3798	4319	1978	3937	4185	2793	3546	3819
Am_HQ_1	.	.	.	.	.	1809.8	0.532612	0.292961	1.81803	0.0690593	0.113362	1809.8	0.405429	0.292908	1.38415	0.166312	0.238523	1809.8	0.36327	0.292876	1.24035	0.214845	0.316509	1398	2185	1953	1277	1802	2008	1033	2235	2359	1493	1736	2525
Am_HQ_62444	F:GO:0003677; C:GO:0005634; P:GO:0006355	F:DNA binding; C:nucleus; P:regulation of transcription, DNA-templated	.	.	.	45.7139	3.08154	3.73005	0.826139	0.408725	0.50716	45.7139	4.99515	3.74289	1.33457	0.182017	0.257537	45.7139	23.8464	3.90725	6.10311	1.04026e-09	1.215e-08	345.55	0	0	19.44	38.94	0	14.12	0	0	0	0	0
Am_HQ_100	.	.	K06617	E2.4.1.82; raffinose synthase [EC:2.4.1.82]	A 9100 Metabolism; B 09101 Carbohydrate metabolism; C 00052 Galactose metabolism [PATH:ko00052]	695.264	0.27204	0.516142	0.527065	0.598149	0.686644	695.264	1.06383	0.516704	2.05887	0.0395067	0.0686821	695.264	1.08811	0.516699	2.10589	0.0352142	0.069281	602.9	476.82	1341.79	746.16	1097.1	840.23	216.99	682.23	707.77	355.58	733.82	451.34
Am_HQ_85678	F:GO:0004553; C:GO:0005618; P:GO:0010411; F:GO:0016762; P:GO:0042546; C:GO:0048046; P:GO:0071555	F:hydrolase activity, hydrolyzing O-glycosyl compounds; C:cell wall; P:xyloglucan metabolic process; F:xyloglucan:xyloglucosyl transferase activity; P:cell wall biogenesis; C:apoplast; P:cell wall organization	K14504	TCH4; xyloglucan:xyloglucosyl transferase TCH4 [EC:2.4.1.207]	A 9130 Environmental Information Processing; B 09132 Signal transduction; C 04075 Plant hormone signal transduction [PATH:ko04075]	464.603	10.3565	1.71006	6.05623	1.39353e-09	9.33722e-09	464.603	13.268	1.9529	6.79399	1.09071e-11	1.1337e-10	464.603	3.31513	1.55885	2.12665	0.0334493	0.0664357	1754.19	1043.41	1216.08	4.49	0	0	0	0	0	520.25	18.18	5.83
Am_HQ_10005	F:GO:0003723; C:GO:0005686; P:GO:0006396; F:GO:0008375; C:GO:0016020; C:GO:0071004; C:GO:0071013	F:RNA binding; C:U2 snRNP; P:RNA processing; F:acetylglucosaminyltransferase activity; C:membrane; C:U2-type prespliceosome; C:catalytic step 2 spliceosome	K12825	SF3A1, SAP114; splicing factor 3A subunit 1	A 9120 Genetic Information Processing; B 09121 Transcription; C 03040 Spliceosome [PATH:ko03040]	619.737	-0.073433	0.500483	-0.146724	0.88335	0.917306	619.737	0.561425	0.500956	1.12071	0.262413	0.351017	619.737	0.606954	0.500971	1.21156	0.225682	0.329341	889.6	429.41	404.21	782.22	844.95	877.21	226.6	666.3	772.54	298.34	603.96	681.74
Am_HQ_54434	F:GO:0005351; C:GO:0005887; P:GO:0034219; P:GO:1902600	F:carbohydrate:proton symporter activity; C:integral component of plasma membrane; P:carbohydrate transmembrane transport; P:proton transmembrane transport	K24193	STP; MFS transporter, SP family, sugar:H+ symporter	None	798.852	-6.20428	3.45589	-1.79528	0.0726093	0.118406	798.852	-12.7909	3.45309	-3.7042	0.000212061	0.000641759	798.852	15.5777	3.64844	4.26969	1.95747e-05	9.30439e-05	1	0	0	0	102.21	0	6880.26	1390.86	1035.41	0	0	0
Am_HQ_10009	C:GO:0005634; F:GO:0043565; P:GO:0045944	C:nucleus; F:sequence-specific DNA binding; P:positive regulation of transcription by RNA polymerase II	K21596	CAMTA; calmodulin-binding transcription activator	None	448.798	-0.53619	0.664022	-0.807489	0.419385	0.517876	448.798	-0.0711644	0.664348	-0.107119	0.914694	0.939611	448.798	0.0783338	0.664447	0.117893	0.906152	0.942624	314.52	493	189.15	410.2	1013.25	452.23	224.65	832	340.23	253.27	772.78	217.48
Am_HQ_89664	.	.	.	.	.	1131.06	-10.6146	3.90832	-2.71589	0.00660979	0.0142389	1131.06	-13.3445	3.9082	-3.41449	0.000639016	0.00173413	1131.06	15.5093	4.08184	3.79958	0.000144941	0.000557415	0	1	0	0	1839	0	5905	3383	2906	0	0	0
Am_HQ_40366	F:GO:0000287; F:GO:0004737; C:GO:0005829; P:GO:0006094; P:GO:0006096; F:GO:0030976	F:magnesium ion binding; F:pyruvate decarboxylase activity; C:cytosol; P:gluconeogenesis; P:glycolytic process; F:thiamine pyrophosphate binding	K01568	PDC, pdc; pyruvate decarboxylase [EC:4.1.1.1]	A 9100 Metabolism; B 09101 Carbohydrate metabolism; C 00010 Glycolysis / Gluconeogenesis [PATH:ko00010]	823.65	9.5876	2.54469	3.76769	0.000164765	0.000503315	823.65	7.31299	2.5211	2.90072	0.00372308	0.00843649	823.65	14.2449	2.77703	5.12955	2.90441e-07	2.0995e-06	4102.32	3261.07	449.42	13.26	0	0	0	37.23	34.24	0	0	0
Am_HQ_57231	C:GO:0005576; C:GO:0005618; P:GO:0005982; P:GO:0005985; F:GO:0030599; P:GO:0042545; P:GO:0043086; F:GO:0045330; P:GO:0045490; F:GO:0046910	C:extracellular region; C:cell wall; P:starch metabolic process; P:sucrose metabolic process; F:pectinesterase activity; P:cell wall modification; P:negative regulation of catalytic activity; F:aspartyl esterase activity; P:pectin catabolic process; F:pectinesterase inhibitor activity	K01051	E3.1.1.11; pectinesterase [EC:3.1.1.11]	A 9100 Metabolism; B 09101 Carbohydrate metabolism; C 00040 Pentose and glucuronate interconversions [PATH:ko00040]|A 9130 Environmental Information Processing; B 09132 Signal transduction; C 02020 Two-component system [PATH:ko02020]	660.192	13.9003	1.45768	9.53586	1.48655e-21	3.63382e-20	660.192	5.83269	0.866897	6.72825	1.71721e-11	1.7375e-10	660.192	13.9117	1.45768	9.54373	1.37783e-21	8.29627e-20	753.8	824.74	4755.79	0	0	0	56.47	37.04	52.13	0	0	0
Am_HQ_47068	F:GO:0003677; F:GO:0003700; C:GO:0005634; C:GO:0005667; P:GO:0006355; P:GO:0006355	F:DNA binding; F:DNA-binding transcription factor activity; C:nucleus; C:transcription regulator complex; P:regulation of transcription, DNA-templated; P:regulation of transcription, DNA-templated	K09284	AP2; AP2-like factor, euAP2 lineage	None	67.703	-20.7264	3.00069	-6.90719	4.94363e-12	4.50492e-11	67.703	-19.8008	3.00195	-6.59599	4.22415e-11	4.00451e-10	67.703	-21.669	3.00003	-7.22291	5.08849e-13	1.01596e-11	0	0	0	0	0	285.36	30.72	6.68	101.29	43.85	0	467.33
Am_HQ_55903	C:GO:0005576; C:GO:0005618; P:GO:0005982; P:GO:0005985; F:GO:0030599; P:GO:0042545; P:GO:0043086; F:GO:0045330; P:GO:0045490; F:GO:0046910	C:extracellular region; C:cell wall; P:starch metabolic process; P:sucrose metabolic process; F:pectinesterase activity; P:cell wall modification; P:negative regulation of catalytic activity; F:aspartyl esterase activity; P:pectin catabolic process; F:pectinesterase inhibitor activity	K01051	E3.1.1.11; pectinesterase [EC:3.1.1.11]	A 9100 Metabolism; B 09101 Carbohydrate metabolism; C 00040 Pentose and glucuronate interconversions [PATH:ko00040]|A 9130 Environmental Information Processing; B 09132 Signal transduction; C 02020 Two-component system [PATH:ko02020]	2351.28	11.7058	0.953815	12.2726	1.27073e-34	7.80015e-33	2351.28	6.31481	0.82756	7.63064	2.336e-14	3.46681e-13	2351.28	13.3083	1.17178	11.3573	6.82419e-30	9.36651e-28	2169.2	3069.26	17504.2	6	0	3	90.53	103.96	189.87	1	1	1
Am_HQ_57504	F:GO:0016491	F:oxidoreductase activity	K21568	PLR; pinoresinol/lariciresinol reductase [EC:1.23.1.1 1.23.1.2 1.23.1.3 1.23.1.4]	A 9100 Metabolism; B 09110 Biosynthesis of other secondary metabolites; C 00999 Biosynthesis of various plant secondary metabolites [PATH:ko00999]	346.529	6.41701	0.799335	8.02793	9.91313e-16	1.38734e-14	346.529	5.29015	0.785421	6.73543	1.63444e-11	1.66212e-10	346.529	12.9539	1.40907	9.19326	3.81118e-20	1.93608e-18	1904.79	369.21	794.36	31.29	6.42	12.72	36.2	33.37	41.02	0	0	0
Am_HQ_1004	F:GO:0004222; C:GO:0009570; P:GO:0016485; F:GO:0046872	F:metalloendopeptidase activity; C:chloroplast stroma; P:protein processing; F:metal ion binding	.	.	.	317.789	-1.33841	0.426894	-3.13523	0.0017172	0.00422427	317.789	-0.405801	0.428237	-0.947609	0.343329	0.437587	317.789	-0.42195	0.42815	-0.985521	0.324368	0.441183	153.12	211.69	139.45	693.16	338.39	663.6	275.1	189.78	419.04	431.37	187.89	280.08
Am_HQ_10045	.	.	.	.	.	578.464	0.35153	0.365903	0.960719	0.336693	0.432121	578.464	-0.50014	0.365054	-1.37004	0.170674	0.243797	578.464	0.356612	0.365889	0.974646	0.329736	0.44697	224	453	762	432	515	538	818	993	837	459	553	475
Am_HQ_10050	F:GO:0003924; F:GO:0005525; P:GO:0007264	F:GTPase activity; F:GTP binding; P:small GTPase mediated signal transduction	K04392	RAC1; Ras-related C3 botulinum toxin substrate 1	A 9130 Environmental Information Processing; B 09132 Signal transduction; C 04010 MAPK signaling pathway [PATH:ko04010]|A 9130 Environmental Information Processing; B 09132 Signal transduction; C 04013 MAPK signaling pathway - fly [PATH:ko04013]|A 9130 Environmental Information Processing; B 09132 Signal transduction; C 04014 Ras signaling pathway [PATH:ko04014]|A 9130 Environmental Information P…	592.157	-0.742747	1.58028	-0.470009	0.638348	0.720661	592.157	0.171416	1.58047	0.108459	0.913632	0.938825	592.157	0.859156	1.5807	0.543528	0.586766	0.693978	4.51	493.08	958.54	12.1	753.97	2602.35	26.34	612.82	1143.13	14.01	357.95	688.19
Am_HQ_1006	C:GO:0000407; P:GO:0006888; P:GO:0030242; C:GO:0031410; P:GO:0032258; P:GO:0034497; C:GO:1990072	C:phagophore assembly site; P:endoplasmic reticulum to Golgi vesicle-mediated transport; P:autophagy of peroxisome; C:cytoplasmic vesicle; P:cytoplasm to vacuole transport by the Cvt pathway; P:protein localization to phagophore assembly site; C:TRAPPIII protein complex	K20305	TRAPPC8, TRS85; trafficking protein particle complex subunit 8	None	583.849	0.374341	0.17208	2.17539	0.0296012	0.0539086	583.849	0.467734	0.172346	2.71392	0.00664914	0.0141923	583.849	0.27814	0.171826	1.61873	0.105505	0.176545	544.84	634.99	536.54	525.42	607.99	634.61	391.96	616.98	659.08	539.1	625.9	742.33
Am_HQ_44617	F:GO:0004575; P:GO:0005982; P:GO:0005985; C:GO:0016021; C:GO:0017177	F:sucrose alpha-glucosidase activity; P:starch metabolic process; P:sucrose metabolic process; C:integral component of membrane; C:glucosidase II complex	K01193	INV, sacA; beta-fructofuranosidase [EC:3.2.1.26]	A 9100 Metabolism; B 09101 Carbohydrate metabolism; C 00052 Galactose metabolism [PATH:ko00052]|A 9100 Metabolism; B 09101 Carbohydrate metabolism; C 00500 Starch and sucrose metabolism [PATH:ko00500]	81.7573	-20.1588	2.51764	-8.00701	1.17536e-15	1.6325e-14	81.7573	-22.4298	2.51572	-8.91587	4.84019e-19	1.27635e-17	81.7573	-18.8407	2.5212	-7.47291	7.84422e-14	1.80752e-12	0	0	0	0	162.89	0	15.15	617.63	227.38	1.65	27.55	40
Am_HQ_10068	F:GO:0004427; P:GO:0006119; F:GO:0009678; C:GO:0016021; P:GO:1902600; P:GO:1902600	F:inorganic diphosphatase activity; P:oxidative phosphorylation; F:pyrophosphate hydrolysis-driven proton transmembrane transporter activity; C:integral component of membrane; P:proton transmembrane transport; P:proton transmembrane transport	K23025	AVP; H+-translocating diphosphatase [EC:7.1.3.1]	None	396.89	0.64171	0.648166	0.990039	0.322155	0.416644	396.89	-0.168343	0.647436	-0.260016	0.794852	0.849271	396.89	0.366198	0.647852	0.56525	0.571903	0.680868	173.69	395.01	545.03	433.44	247.59	237.84	832.07	382.13	331.57	665.59	288.15	172.9
Am_HQ_10069	F:GO:0003700; C:GO:0005634; C:GO:0005667; P:GO:0006355; P:GO:0008285; P:GO:0009734; P:GO:0009737; P:GO:0009911; P:GO:0010047; P:GO:0010150; P:GO:0010227; F:GO:0043565; P:GO:0045892; P:GO:0048481; P:GO:1903288	F:DNA-binding transcription factor activity; C:nucleus; C:transcription regulator complex; P:regulation of transcription, DNA-templated; P:negative regulation of cell population proliferation; P:auxin-activated signaling pathway; P:response to abscisic acid; P:positive regulation of flower development; P:fruit dehiscence; P:leaf senescence; P:floral organ abscission; F:sequence-specific DNA bindi…	.	.	.	744.374	-1.53499	2.847	-0.53916	0.589777	0.679114	744.374	0.013281	2.84717	0.00466464	0.996278	0.997504	744.374	-1.02572	2.84703	-0.360276	0.718641	0.804035	378.45	696.24	0	1615.56	2223.24	0	504.41	820.96	1.83	1281.98	1534.23	0
Am_HQ_10083	.	.	K17985	AMBRA1; activating molecule in BECN1-regulated autophagy protein 1	A 9140 Cellular Processes; B 09141 Transport and catabolism; C 04140 Autophagy - animal [PATH:ko04140]|A 9140 Cellular Processes; B 09141 Transport and catabolism; C 04137 Mitophagy - animal [PATH:ko04137]|A 9160 Human Diseases; B 09164 Neurodegenerative disease; C 05010 Alzheimer disease [PATH:ko05010]|A 9160 Human Diseases; B 09164 Neurodegenerative disease; C 05014 Amyotrophic lateral sclerosi…	309.43	0.590962	0.971127	0.608532	0.542835	0.636707	309.43	0.971205	0.971472	0.999725	0.317444	0.410426	309.43	0.86462	0.971342	0.89013	0.373396	0.492527	128.19	344.02	658.17	108.17	316.67	596.37	17.04	322.04	463.89	76.3	289.18	464.37
Am_HQ_74982	C:GO:0005886	C:plasma membrane	.	.	.	308.683	6.42983	1.62014	3.9687	7.2267e-05	0.000235609	308.683	5.40683	1.61292	3.3522	0.000801725	0.00212047	308.683	12.7901	1.99148	6.42241	1.34134e-10	1.82182e-09	1618.54	262.71	859.62	0	43	0	20.94	40	31	0	0	0
Am_HQ_10097	P:GO:0006402; P:GO:0017148; C:GO:0030014	P:mRNA catabolic process; P:negative regulation of translation; C:CCR4-NOT complex	K12607	CNOT10; CCR4-NOT transcription complex subunit 10	A 9120 Genetic Information Processing; B 09123 Folding, sorting and degradation; C 03018 RNA degradation [PATH:ko03018]	400.981	-0.377124	0.148329	-2.54249	0.0110065	0.0224418	400.981	-0.485352	0.148005	-3.27929	0.00104067	0.00268374	400.981	-0.282901	0.148619	-1.90353	0.0569717	0.104409	213	293	294	437	466	474	454	489	533	379	442	482
Am_HQ_82790	F:GO:0005506; C:GO:0005737; P:GO:0019310; F:GO:0050113	F:iron ion binding; C:cytoplasm; P:inositol catabolic process; F:inositol oxygenase activity	K00469	MIOX; inositol oxygenase [EC:1.13.99.1]	A 9100 Metabolism; B 09101 Carbohydrate metabolism; C 00053 Ascorbate and aldarate metabolism [PATH:ko00053]|A 9100 Metabolism; B 09101 Carbohydrate metabolism; C 00562 Inositol phosphate metabolism [PATH:ko00562]	487.509	12.4209	1.98244	6.26546	3.71723e-10	2.68267e-09	487.509	3.73246	1.59602	2.33861	0.0193558	0.0366642	487.509	12.4324	1.98244	6.27125	3.58155e-10	4.55642e-09	12	161.23	4274.92	0	1	0	294.2	37.36	72.62	0	1	0
Am_HQ_101	P:GO:0000462; C:GO:0030686; C:GO:0032040; C:GO:0034455; P:GO:0045943	P:maturation of SSU-rRNA from tricistronic rRNA transcript (SSU-rRNA, 5.8S rRNA, LSU-rRNA); C:90S preribosome; C:small-subunit processome; C:t-UTP complex; P:positive regulation of transcription by RNA polymerase I	K14550	UTP10, HEATR1; U3 small nucleolar RNA-associated protein 10	A 9120 Genetic Information Processing; B 09122 Translation; C 03008 Ribosome biogenesis in eukaryotes [PATH:ko03008]	713.005	-0.413221	0.410215	-1.00733	0.313778	0.407603	713.005	0.171179	0.410738	0.41676	0.676854	0.754381	713.005	-0.77365	0.409983	-1.88703	0.059156	0.107866	588	610	205	769	865	870	383	616	691	791	1007	1464
Am_HQ_52023	F:GO:0004857; C:GO:0005576; C:GO:0005618; P:GO:0005982; P:GO:0005985; F:GO:0030599; P:GO:0042545; P:GO:0043086; F:GO:0045330; P:GO:0045490	F:enzyme inhibitor activity; C:extracellular region; C:cell wall; P:starch metabolic process; P:sucrose metabolic process; F:pectinesterase activity; P:cell wall modification; P:negative regulation of catalytic activity; F:aspartyl esterase activity; P:pectin catabolic process	K01051	E3.1.1.11; pectinesterase [EC:3.1.1.11]	A 9100 Metabolism; B 09101 Carbohydrate metabolism; C 00040 Pentose and glucuronate interconversions [PATH:ko00040]|A 9130 Environmental Information Processing; B 09132 Signal transduction; C 02020 Two-component system [PATH:ko02020]	2384.81	-20.903	4.24799	-4.92067	8.62487e-07	3.896e-06	2384.81	-27.8011	4.24704	-6.54598	5.91073e-11	5.46279e-10	2384.81	0	4.40736	0	1	1	0	0	0	0	246.36	0	20728.9	4087.79	2987.89	0	0	0
Am_HQ_84978	F:GO:0046872; F:GO:0051213	F:metal ion binding; F:dioxygenase activity	.	.	.	209.202	12.2669	4.24717	2.88825	0.00387392	0.00881626	209.202	12.2556	4.24717	2.8856	0.00390669	0.00880379	209.202	12.2784	4.24717	2.89095	0.00384076	0.0101632	967	258	727	0	0	0	0	0	0	0	0	0
Am_HQ_38426	C:GO:0005749; P:GO:0006099; P:GO:0006118; P:GO:0006121; F:GO:0008177; F:GO:0009055; F:GO:0050660	C:mitochondrial respiratory chain complex II, succinate dehydrogenase complex (ubiquinone); P:tricarboxylic acid cycle; P:obsolete electron transport; P:mitochondrial electron transport, succinate to ubiquinone; F:succinate dehydrogenase (ubiquinone) activity; F:electron transfer activity; F:flavin adenine dinucleotide binding	K00234	SDHA, SDH1; succinate dehydrogenase (ubiquinone) flavoprotein subunit [EC:1.3.5.1]	A 9100 Metabolism; B 09101 Carbohydrate metabolism; C 00020 Citrate cycle (TCA cycle) [PATH:ko00020]|A 9100 Metabolism; B 09102 Energy metabolism; C 00190 Oxidative phosphorylation [PATH:ko00190]|A 9150 Organismal Systems; B 09159 Environmental adaptation; C 04714 Thermogenesis [PATH:ko04714]|A 9160 Human Diseases; B 09161 Cancer: overview; C 05208 Chemical carcinogenesis - reactive oxygen specie…	228.795	-19.5528	4.24922	-4.6015	4.19455e-06	1.7042e-05	228.795	-24.1964	4.24712	-5.69712	1.21851e-08	7.92814e-08	228.795	-18.2558	4.25234	-4.29312	1.76183e-05	8.47105e-05	0	0	0.01	19.58	0	102.18	2352.83	0	92.73	0	0	48.19
Am_HQ_74114	F:GO:0004650; C:GO:0005576; P:GO:0005982; P:GO:0005985; F:GO:0047911; P:GO:0071555	F:polygalacturonase activity; C:extracellular region; P:starch metabolic process; P:sucrose metabolic process; F:galacturan 1,4-alpha-galacturonidase activity; P:cell wall organization	K01213	E3.2.1.67; galacturan 1,4-alpha-galacturonidase [EC:3.2.1.67]	A 9100 Metabolism; B 09101 Carbohydrate metabolism; C 00040 Pentose and glucuronate interconversions [PATH:ko00040]	694.728	-20.481	4.24839	-4.82088	1.42927e-06	6.27042e-06	694.728	-26.0913	4.24706	-6.14338	8.0783e-10	6.31729e-09	694.728	0	4.40736	0	1	1	0	0	0	0	173	0	6068	1061	855	0	0	0
Am_HQ_34081	F:GO:0004564; P:GO:0005982; P:GO:0005985; P:GO:0006012; C:GO:0016020	F:beta-fructofuranosidase activity; P:starch metabolic process; P:sucrose metabolic process; P:galactose metabolic process; C:membrane	K01193	INV, sacA; beta-fructofuranosidase [EC:3.2.1.26]	A 9100 Metabolism; B 09101 Carbohydrate metabolism; C 00052 Galactose metabolism [PATH:ko00052]|A 9100 Metabolism; B 09101 Carbohydrate metabolism; C 00500 Starch and sucrose metabolism [PATH:ko00500]	94.0536	-20.0172	2.45037	-8.16906	3.10795e-16	4.53629e-15	94.0536	-22.7538	2.44803	-9.29473	1.47578e-20	4.69912e-19	94.0536	-17.8743	2.45961	-7.26714	3.67185e-13	7.45092e-12	0	0	0	0	148.47	0	45.92	739.99	287.15	1.36	12.45	23.17
Am_HQ_10121	F:GO:0001664; F:GO:0003924; F:GO:0005525; C:GO:0005834; P:GO:0007188; F:GO:0031683	F:G protein-coupled receptor binding; F:GTPase activity; F:GTP binding; C:heterotrimeric G-protein complex; P:adenylate cyclase-modulating G protein-coupled receptor signaling pathway; F:G-protein beta/gamma-subunit complex binding	.	.	.	157.336	0.0880702	1.01598	0.0866854	0.930922	0.952429	157.336	2.15311	1.02099	2.10886	0.0349569	0.0617045	157.336	0.412356	1.01635	0.405723	0.684946	0.777557	66.28	176.44	294.85	175.26	221.61	268.83	0	78.47	90.12	112.72	179.15	242.69
Am_HQ_10123	F:GO:0003729	F:mRNA binding	K20102	YTHDF; YTH domain-containing family protein	None	156.431	1.59164	0.791856	2.01001	0.04443	0.0771927	156.431	1.26177	0.791071	1.59502	0.110708	0.168348	156.431	1.72875	0.79221	2.18218	0.0290959	0.0589182	39.48	247.01	480.16	70.78	99.86	166.09	91.03	120	210.87	191.79	47.91	59.01
Am_HQ_20793	P:GO:0000398; C:GO:0005634; F:GO:0008270; F:GO:0045131	P:mRNA splicing, via spliceosome; C:nucleus; F:zinc ion binding; F:pre-mRNA branch point binding	K13095	SF1; splicing factor 1	None	171.049	5.50311	1.01474	5.42317	5.85512e-08	3.13057e-07	171.049	3.13466	0.995407	3.14912	0.00163762	0.00403479	171.049	11.8047	1.53914	7.66965	1.72466e-14	4.35789e-13	611.65	419.34	408.05	15.87	0	28.75	26.75	98.73	105.03	0	0	0
Am_HQ_49238	F:GO:0004322; F:GO:0005507; C:GO:0005886; P:GO:0006118; P:GO:0006826; F:GO:0008447; P:GO:0015994; C:GO:0016021; P:GO:0019852; P:GO:0055072	F:ferroxidase activity; F:copper ion binding; C:plasma membrane; P:obsolete electron transport; P:iron ion transport; F:L-ascorbate oxidase activity; P:chlorophyll metabolic process; C:integral component of membrane; P:L-ascorbic acid metabolic process; P:iron ion homeostasis	K00423	E1.10.3.3; L-ascorbate oxidase [EC:1.10.3.3]	A 9100 Metabolism; B 09101 Carbohydrate metabolism; C 00053 Ascorbate and aldarate metabolism [PATH:ko00053]	516.936	-20.3633	4.24849	-4.79306	1.6426e-06	7.13268e-06	516.936	-25.6432	4.24707	-6.03785	1.56184e-09	1.16718e-08	516.936	0	4.40736	0	1	1	0	0	0	0	161	0	4310	915	727	0	0	0
Am_HQ_10134	F:GO:0008270; C:GO:0016020; F:GO:0016874	F:zinc ion binding; C:membrane; F:ligase activity	K10144	RCHY1, PIRH2; RING finger and CHY zinc finger domain-containing protein 1 [EC:2.3.2.27]	A 9120 Genetic Information Processing; B 09123 Folding, sorting and degradation; C 04120 Ubiquitin mediated proteolysis [PATH:ko04120]|A 9140 Cellular Processes; B 09143 Cell growth and death; C 04115 p53 signaling pathway [PATH:ko04115]|A 9160 Human Diseases; B 09172 Infectious disease: viral; C 05162 Measles [PATH:ko05162]	134.099	-0.836936	1.61731	-0.517485	NA	NA	134.099	-0.0514155	1.61864	-0.0317647	NA	NA	134.099	-2.26096	1.61619	-1.39895	NA	NA	104.7	7.11	27.81	305.7	21.07	14.52	142.67	31.64	14.09	933.53	13.63	8.53
Am_HQ_10136	F:GO:0016758	F:hexosyltransferase activity	.	.	.	52.6775	-8.86148	1.55372	-5.7034	1.17444e-08	6.94168e-08	52.6775	-2.61042	1.62813	-1.60333	0.108863	0.16593	52.6775	-2.47477	1.63397	-1.51457	0.12988	0.20971	0	1	0	182.59	177.64	318.59	0	6.61	2.07	5.99	0	1.86
Am_HQ_10139	F:GO:0003876; P:GO:0006144; C:GO:0016021; P:GO:0032264	F:AMP deaminase activity; P:purine nucleobase metabolic process; C:integral component of membrane; P:IMP salvage	K01490	AMPD; AMP deaminase [EC:3.5.4.6]	A 9100 Metabolism; B 09104 Nucleotide metabolism; C 00230 Purine metabolism [PATH:ko00230]	769.649	0.94047	0.512444	1.83526	0.0664665	0.109651	769.649	1.12762	0.512595	2.19982	0.0278197	0.0505226	769.649	0.761213	0.512318	1.48582	0.137326	0.21963	596.46	631	1693.48	486.85	518.67	1080.42	415.63	493.84	903.57	586.09	534.06	1221.3
Am_HQ_84218	F:GO:0000977; F:GO:0003700; C:GO:0005634; C:GO:0005667; P:GO:0006355; F:GO:0008134; P:GO:0010582; C:GO:0016021; P:GO:0045944; F:GO:0046983	F:RNA polymerase II transcription regulatory region sequence-specific DNA binding; F:DNA-binding transcription factor activity; C:nucleus; C:transcription regulator complex; P:regulation of transcription, DNA-templated; F:transcription factor binding; P:floral meristem determinacy; C:integral component of membrane; P:positive regulation of transcription by RNA polymerase II; F:protein dimerizatio…	K09264	K09264; MADS-box transcription factor, plant	None	355.769	-19.4133	4.22001	-4.60029	4.219e-06	1.7135e-05	355.769	-25.0005	4.21744	-5.92789	3.0685e-09	2.18805e-08	355.769	0	4.37879	0	1	1	0	0	0	0	90	0	1389	1434	1682	0	0	0
Am_HQ_14298	F:GO:0003729; C:GO:0005681; C:GO:0005737; P:GO:0048026	F:mRNA binding; C:spliceosomal complex; C:cytoplasm; P:positive regulation of mRNA splicing, via spliceosome	.	.	.	137.67	11.6447	1.6002	7.277	3.4132e-13	3.58996e-12	137.67	6.26425	1.12459	5.57028	2.54335e-08	1.56773e-07	137.67	11.6561	1.6002	7.28418	3.23641e-13	6.66525e-12	745.17	63.3	434.99	0	0	0	11.12	5.99	5.32	0	0	0
Am_HQ_1015	F:GO:0000287; F:GO:0005524; C:GO:0005886; C:GO:0016021; F:GO:0016787; P:GO:0045332; F:GO:0140326	F:magnesium ion binding; F:ATP binding; C:plasma membrane; C:integral component of membrane; F:hydrolase activity; P:phospholipid translocation; F:ATPase-coupled intramembrane lipid transporter activity	K01530	E7.6.2.1; phospholipid-translocating ATPase [EC:7.6.2.1]	None	375.303	0.350715	0.671399	0.522365	0.601416	0.689285	375.303	1.43791	0.672798	2.13721	0.0325805	0.0580523	375.303	0.22657	0.671287	0.337516	0.735728	0.816911	53	494	716	239	509	541	136	211	260	441	412	549
Am_HQ_31997	.	.	.	.	.	4726.91	-14.7774	1.72614	-8.56095	1.11937e-17	1.87535e-16	4726.91	-13.3481	1.72619	-7.73271	1.05279e-14	1.64531e-13	4726.91	-15.4557	1.72613	-8.95399	3.42855e-19	1.5368e-17	0	0	0	5359.49	8489.41	6789.57	992.88	3160.94	3810.36	194.26	31132.1	1603.64
Am_HQ_10159	P:GO:0015979; P:GO:0015995; F:GO:0046872; F:GO:0048529	P:photosynthesis; P:chlorophyll biosynthetic process; F:metal ion binding; F:magnesium-protoporphyrin IX monomethyl ester (oxidative) cyclase activity	K04035	E1.14.13.81, acsF, chlE; magnesium-protoporphyrin IX monomethyl ester (oxidative) cyclase [EC:1.14.13.81]	A 9100 Metabolism; B 09108 Metabolism of cofactors and vitamins; C 00860 Porphyrin metabolism [PATH:ko00860]	221.124	-2.23378	1.06261	-2.10216	0.0355396	0.0633248	221.124	-1.6614	1.06303	-1.56289	0.118079	0.177952	221.124	-1.42922	1.06322	-1.34423	0.178873	0.272621	20.86	85.67	86.42	40.83	446.17	735.85	37.46	294.65	503.97	33.13	242.03	410.86
Am_HQ_30262	.	.	K14485	TIR1; transport inhibitor response 1	A 9130 Environmental Information Processing; B 09132 Signal transduction; C 04075 Plant hormone signal transduction [PATH:ko04075]	133.298	4.49367	1.73503	2.58996	0.0095986	0.0198586	133.298	6.30771	1.75598	3.59213	0.000327991	0.000953174	133.298	11.5485	2.09027	5.52491	3.29654e-08	2.94093e-07	473.51	22.63	679.93	32.2	36.96	0	0	10.24	11.51	0	0	0
Am_HQ_90001	C:GO:0031305; P:GO:0033617	C:integral component of mitochondrial inner membrane; P:mitochondrial cytochrome c oxidase assembly	.	.	.	3604.94	16.3736	1.40409	11.6614	2.00819e-31	1.00857e-29	3604.94	12.4772	0.9161	13.6198	3.05197e-42	6.30303e-40	3604.94	11.5233	0.844769	13.6408	2.2918e-42	7.23487e-40	22853	4760	5268	0	0	0	4	2	2	4	8	4
Am_HQ_90132	P:GO:0006869; F:GO:0008289	P:lipid transport; F:lipid binding	.	.	.	6332.12	-22.9917	3.4049	-6.75254	1.4528e-11	1.24241e-10	6332.12	-28.9374	3.40467	-8.49932	1.907e-17	4.14364e-16	6332.12	-15.4537	3.44729	-4.48286	7.36509e-06	3.86956e-05	0	0	0	0	1254.7	0	47904.1	14902.6	12027.8	3.87	3.28	0
Am_HQ_53373	F:GO:0005488; P:GO:0031326	F:binding; P:regulation of cellular biosynthetic process	.	.	.	100.276	11.1041	2.2845	4.86061	1.17024e-06	5.18755e-06	100.276	11.0928	2.2845	4.85568	1.19972e-06	5.60612e-06	100.276	3.76496	1.96329	1.91768	0.0551514	0.101561	68.33	167.65	686.37	0	0	0	0	0	0	7.92	0	84.88
Am_HQ_10176	.	.	.	.	.	408.505	-0.153912	0.166675	-0.923424	0.355786	0.451978	408.505	-0.164347	0.166686	-0.985966	0.32415	0.417695	408.505	-0.403594	0.165866	-2.43325	0.0149638	0.0332966	268	376.05	237	409.24	407.72	484.98	335.69	471.49	504.83	535.4	495.99	523.5
Am_HQ_11257	F:GO:0005524; C:GO:0005886; P:GO:0006119; F:GO:0008553; C:GO:0016021; P:GO:0120029; P:GO:1902600	F:ATP binding; C:plasma membrane; P:oxidative phosphorylation; F:P-type proton-exporting transporter activity; C:integral component of membrane; P:proton export across plasma membrane; P:proton transmembrane transport	K01535	PMA1, PMA2; H+-transporting ATPase [EC:7.1.2.1]	A 9100 Metabolism; B 09102 Energy metabolism; C 00190 Oxidative phosphorylation [PATH:ko00190]	220.021	9.41976	1.66565	5.65531	1.55567e-08	9.05377e-08	220.021	11.3639	1.91365	5.93836	2.8788e-09	2.06009e-08	220.021	11.3867	1.91365	5.95025	2.6774e-09	2.88893e-08	24	155	1981	3	1	0	0	1	0	0	0	1
Am_HQ_6234	C:GO:0005768; C:GO:0005802; P:GO:0009061; C:GO:0016021	C:endosome; C:trans-Golgi network; P:anaerobic respiration; C:integral component of membrane	.	.	.	96.6906	7.21198	2.25719	3.19512	0.00139774	0.00350395	96.6906	6.75018	2.24238	3.01028	0.00261006	0.00613455	96.6906	11.1422	2.49649	4.46314	8.07668e-06	4.2041e-05	265.96	92.65	547.97	0	7.87	0	9.76	0	0	0	0	0
Am_HQ_10191	C:GO:0005887; P:GO:0016485	C:integral component of plasma membrane; P:protein processing	K06171	NCSTN; nicastrin	A 9130 Environmental Information Processing; B 09132 Signal transduction; C 04330 Notch signaling pathway [PATH:ko04330]|A 9160 Human Diseases; B 09164 Neurodegenerative disease; C 05010 Alzheimer disease [PATH:ko05010]	253.8	-0.0788019	0.163749	-0.481237	0.630348	0.71433	253.8	-0.0984887	0.163714	-0.601588	0.547448	0.639742	253.8	-0.165196	0.163227	-1.01206	0.311508	0.427029	153.33	236.65	197.56	240.7	280.64	301.26	255.5	288.7	280.71	262.57	284.74	331.69
Am_HQ_10194	F:GO:0003676; F:GO:0004534; C:GO:0005634; P:GO:0006397; P:GO:0051252; P:GO:0090503	F:nucleic acid binding; F:5'-3' exoribonuclease activity; C:nucleus; P:mRNA processing; P:regulation of RNA metabolic process; P:RNA phosphodiester bond hydrolysis, exonucleolytic	.	.	.	295.016	1.28595	0.345851	3.71821	0.000200638	0.000601342	295.016	0.688713	0.344129	2.00132	0.0453579	0.0776751	295.016	0.585564	0.343824	1.70309	0.088551	0.152044	337.94	295.58	424.15	163.74	126.27	308.43	292.45	259.89	321.33	246.44	290.67	423.8
Am_HQ_58934	F:GO:0004185; C:GO:0005773; C:GO:0016021; P:GO:0051603	F:serine-type carboxypeptidase activity; C:vacuole; C:integral component of membrane; P:proteolysis involved in cellular protein catabolic process	K16297	SCPL-II; serine carboxypeptidase-like clade II [EC:3.4.16.-]	None	113.141	3.63814	0.357694	10.1711	2.66948e-24	8.37928e-23	113.141	3.06905	0.348109	8.81634	1.18257e-18	2.97976e-17	113.141	11.1281	1.22243	9.10325	8.76716e-20	4.23932e-18	306.37	280.35	326.28	31.61	36.2	29.69	56.94	39.69	45.54	0	0	0
Am_HQ_74389	P:GO:0006869; F:GO:0008289; C:GO:0016021	P:lipid transport; F:lipid binding; C:integral component of membrane	.	.	.	19821.4	-17.3221	1.20293	-14.4	5.17667e-47	6.89121e-45	19821.4	-17.1524	1.20293	-14.2588	3.94917e-46	1.06425e-43	19821.4	-15.3026	1.20295	-12.7209	4.5264e-37	1.03118e-34	0	0	0	35718.9	31441.2	55479.5	28569.8	40930.4	37863.1	11186.6	10598.7	8104.24
Am_HQ_87920	F:GO:0000977; F:GO:0003700; C:GO:0005634; C:GO:0005667; P:GO:0006355; P:GO:0007275; F:GO:0008134; C:GO:0016021; P:GO:0045944; F:GO:0046983	F:RNA polymerase II transcription regulatory region sequence-specific DNA binding; F:DNA-binding transcription factor activity; C:nucleus; C:transcription regulator complex; P:regulation of transcription, DNA-templated; P:multicellular organism development; F:transcription factor binding; C:integral component of membrane; P:positive regulation of transcription by RNA polymerase II; F:protein dime…	K09264	K09264; MADS-box transcription factor, plant	None	266.982	-21.5602	4.24769	-5.07575	3.85977e-07	1.83663e-06	266.982	-24.6051	4.24712	-5.79337	6.89863e-09	4.66053e-08	266.982	0	4.40736	0	1	1	0	0	0	0	358	0	1389	839	737	0	0	0
Am_HQ_16867	F:GO:0004072; F:GO:0004412; P:GO:0006544; P:GO:0006563; P:GO:0006566; P:GO:0009085; P:GO:0009090; C:GO:0009507; P:GO:0016310; F:GO:0050661	F:aspartate kinase activity; F:homoserine dehydrogenase activity; P:glycine metabolic process; P:L-serine metabolic process; P:threonine metabolic process; P:lysine biosynthetic process; P:homoserine biosynthetic process; C:chloroplast; P:phosphorylation; F:NADP binding	K12524	thrA; bifunctional aspartokinase / homoserine dehydrogenase 1 [EC:2.7.2.4 1.1.1.3]	A 9100 Metabolism; B 09105 Amino acid metabolism; C 00260 Glycine, serine and threonine metabolism [PATH:ko00260]|A 9100 Metabolism; B 09105 Amino acid metabolism; C 00270 Cysteine and methionine metabolism [PATH:ko00270]|A 9100 Metabolism; B 09105 Amino acid metabolism; C 00300 Lysine biosynthesis [PATH:ko00300]|A 9100 Metabolism; B 09110 Biosynthesis of other secondary metabolites; C 00261 Mono…	2403.94	-10.8569	1.25625	-8.64227	5.51048e-18	9.56564e-17	2403.94	-11.17	1.25614	-8.89234	5.98344e-19	1.56661e-17	2403.94	-15.2244	1.25567	-12.1245	7.83225e-34	1.39578e-31	0	0	0	365.38	680.05	295.61	401.48	734.06	570.67	6247.61	11600.6	10645.9
Am_HQ_88751	.	.	.	.	.	179.266	11.0813	1.27296	8.70514	3.17176e-18	5.65238e-17	179.266	12.0318	1.27296	9.45186	3.32863e-21	1.12989e-19	179.266	11.0928	1.27296	8.71416	2.92918e-18	1.19426e-16	610	469	644	1	0	0	0	0	0	1	0	0
Am_HQ_44513	F:GO:0004499; F:GO:0050660; F:GO:0050661	F:N,N-dimethylaniline monooxygenase activity; F:flavin adenine dinucleotide binding; F:NADP binding	K00485	FMO; dimethylaniline monooxygenase (N-oxide forming) [EC:1.14.13.8]	A 9100 Metabolism; B 09111 Xenobiotics biodegradation and metabolism; C 00982 Drug metabolism - cytochrome P450 [PATH:ko00982]	1359.4	-9.50101	1.46586	-6.48154	9.07903e-11	7.04206e-10	1359.4	-7.84161	1.46878	-5.33887	9.35259e-08	5.21376e-07	1359.4	-14.4923	1.46456	-9.89528	4.36397e-23	3.10081e-21	0	0	0	286.76	145.14	84.65	10	129.02	35.15	2347.67	6241.92	8692.03
Am_HQ_10239	.	.	.	.	.	230.683	0.448287	0.260631	1.72	0.0854317	0.136214	230.683	0.423496	0.260578	1.62522	0.104116	0.15963	230.683	-0.546033	0.257	-2.12464	0.0336165	0.0666368	151.6	278.31	150.87	169.46	157.65	236.56	199.18	176.32	183.65	335.01	394.76	392.11
Am_HQ_59751	P:GO:0006633; C:GO:0016021; F:GO:0016747	P:fatty acid biosynthetic process; C:integral component of membrane; F:acyltransferase activity, transferring groups other than amino-acyl groups	K15397	KCS; 3-ketoacyl-CoA synthase [EC:2.3.1.199]	A 9100 Metabolism; B 09103 Lipid metabolism; C 00062 Fatty acid elongation [PATH:ko00062]|A 9150 Organismal Systems; B 09159 Environmental adaptation; C 04626 Plant-pathogen interaction [PATH:ko04626]	65.7877	-19.5002	4.24116	-4.59784	4.26896e-06	1.73252e-05	65.7877	-22.5686	4.23878	-5.3243	1.01343e-07	5.61555e-07	65.7877	0	4.39909	0	1	1	0	0	0	0	87	0	116	297	376	0	0	0
Am_HQ_33260	P:GO:0010088	P:phloem development	.	.	.	8442.93	-11.7473	1.51118	-7.77361	7.62795e-15	9.67637e-14	8442.93	-11.8358	1.51118	-7.83219	4.7943e-15	7.83033e-14	8442.93	-14.3508	1.51114	-9.49668	2.16688e-21	1.29066e-19	0	1	2	3872.95	7030.04	2227.4	3649.95	4991.34	5789.19	1419.77	79242.5	695.12
Am_HQ_65237	F:GO:0016620	F:oxidoreductase activity, acting on the aldehyde or oxo group of donors, NAD or NADP as acceptor	K12355	REF1; coniferyl-aldehyde dehydrogenase [EC:1.2.1.68]	A 9100 Metabolism; B 09110 Biosynthesis of other secondary metabolites; C 00940 Phenylpropanoid biosynthesis [PATH:ko00940]	84.5455	6.00605	1.35331	4.43804	9.0782e-06	3.48077e-05	84.5455	10.7311	1.7542	6.11739	9.51205e-10	7.36759e-09	84.5455	2.76447	1.30556	2.11746	0.0342212	0.0676829	398	203	81	9	5	0	0	0	0	46	88	4
Am_HQ_80362	.	.	.	.	.	91.6573	11.0764	4.24733	2.60785	0.00911134	0.018957	91.6573	11.0651	4.24733	2.6052	0.00918212	0.0189014	91.6573	11.0879	4.24733	2.61055	0.00903964	0.0215466	6	52	843	0	0	0	0	0	0	0	0	0
Am_HQ_45314	F:GO:0003746; C:GO:0005840; F:GO:0043022; P:GO:0045901	F:translation elongation factor activity; C:ribosome; F:ribosome binding; P:positive regulation of translational elongation	K03263	EIF5A; translation initiation factor 5A	None	90.7464	10.095	2.23784	4.51105	6.45083e-06	2.53604e-05	90.7464	8.45276	2.06088	4.10153	4.10419e-05	0.000144671	90.7464	11.0683	2.23784	4.94597	7.57675e-07	5.01291e-06	17	59	812	1	0	0	3	0	0	0	0	0
Am_HQ_45557	.	.	.	.	.	10456.8	-16.04	1.28278	-12.5041	7.08998e-36	4.79126e-34	10456.8	-13.365	1.28282	-10.4184	2.04347e-25	1.05015e-23	10456.8	-14.0409	1.2828	-10.9455	6.9837e-28	7.79423e-26	0	0	1	38502.3	21941.8	36448.4	2253.86	5335.46	8085.05	11019.2	8960.62	4162.32
Am_HQ_10266	F:GO:0005524	F:ATP binding	K09486	HYOU1; hypoxia up-regulated 1	A 9120 Genetic Information Processing; B 09123 Folding, sorting and degradation; C 04141 Protein processing in endoplasmic reticulum [PATH:ko04141]	1223.49	-0.160202	0.459529	-0.348622	0.727373	0.795739	1223.49	-0.832668	0.459279	-1.81299	0.0698334	0.112896	1223.49	-0.549303	0.459362	-1.1958	0.231777	0.336717	279.86	1376.98	677.19	725.02	1342.98	1268.88	1208.16	2144.03	1982.63	1273.77	1228.45	1898.22
Am_HQ_10267	F:GO:0005049; C:GO:0005635; C:GO:0005829; P:GO:0006606; P:GO:0006611; P:GO:0007165	F:nuclear export signal receptor activity; C:nuclear envelope; C:cytosol; P:protein import into nucleus; P:protein export from nucleus; P:signal transduction	K18423	CSE1, CAS, XPO2; exportin-2 (importin alpha re-exporter)	A 9120 Genetic Information Processing; B 09122 Translation; C 03013 Nucleocytoplasmic transport [PATH:ko03013]|A 9160 Human Diseases; B 09171 Infectious disease: bacterial; C 05132 Salmonella infection [PATH:ko05132]	248.064	0.818606	0.556071	1.47212	0.140987	0.20848	248.064	1.04171	0.556619	1.8715	0.0612762	0.100773	248.064	0.103935	0.554855	0.187319	0.85141	0.903292	275.05	204.31	321	135.56	149.86	347	86.68	143.76	312.98	205.75	229.71	592
Am_HQ_77313	P:GO:0009805; P:GO:0009809; P:GO:0009811; F:GO:0016616; F:GO:0016621	P:coumarin biosynthetic process; P:lignin biosynthetic process; P:stilbene biosynthetic process; F:oxidoreductase activity, acting on the CH-OH group of donors, NAD or NADP as acceptor; F:cinnamoyl-CoA reductase activity	.	.	.	3438.24	-14.0909	1.19538	-11.7878	4.51276e-32	2.40296e-30	3438.24	-12.0771	1.19549	-10.1022	5.40133e-24	2.46609e-22	3438.24	-13.1975	1.19541	-11.0402	2.44596e-28	2.82989e-26	0	1	0	8993.07	6776.78	9323.08	1841.99	2355.5	1951.95	4446.25	5041.81	4068.57
Am_HQ_82841	F:GO:0005199; C:GO:0005618; P:GO:0031505; P:GO:0042546	F:structural constituent of cell wall; C:cell wall; P:fungal-type cell wall organization; P:cell wall biogenesis	.	.	.	90.2134	11.0535	4.24733	2.60245	0.00925597	0.0192308	90.2134	11.0422	4.24733	2.5998	0.00932775	0.0191744	90.2134	11.065	4.24733	2.60516	0.00918326	0.0218488	13	82	794	0	0	0	0	0	0	0	0	0
Am_HQ_71829	F:GO:0016491	F:oxidoreductase activity	.	.	.	68.9733	10.2533	1.55865	6.57835	4.75713e-11	3.81295e-10	68.9733	10.2421	1.55865	6.57112	4.9937e-11	4.66402e-10	68.9733	1.59382	1.02522	1.55462	0.120038	0.196634	314.99	132.96	32.63	0	0	0	0	0	0	54.46	77.45	95.3
Am_HQ_70148	P:GO:0006364	P:rRNA processing	K24750	WDR55, JIP5; WD repeat-containing protein 55	None	104.464	7.0092	2.44462	2.86719	0.00414135	0.00935647	104.464	2.64274	2.39925	1.10149	0.270685	0.360163	104.464	11.0529	2.6707	4.13859	3.49444e-05	0.00015688	532.46	0.66	276.34	0	0	9.65	111.53	0	61.89	0.04	0	0
Am_HQ_10292	F:GO:0004672; F:GO:0005524; P:GO:0006468	F:protein kinase activity; F:ATP binding; P:protein phosphorylation	K08876	SCYL1; SCY1-like protein 1	None	102.34	-0.274523	3.87307	-0.0708799	NA	NA	102.34	-0.584731	3.87291	-0.15098	NA	NA	102.34	-0.391436	3.873	-0.101068	NA	NA	0	216.91	4.44	3.71	301.81	0	5.01	402.58	0	0	344.54	0
Am_HQ_10295	P:GO:0001732; F:GO:0003743; C:GO:0005840; C:GO:0005852; P:GO:0006446; C:GO:0016282; F:GO:0031369; C:GO:0033290	P:formation of cytoplasmic translation initiation complex; F:translation initiation factor activity; C:ribosome; C:eukaryotic translation initiation factor 3 complex; P:regulation of translational initiation; C:eukaryotic 43S preinitiation complex; F:translation initiation factor binding; C:eukaryotic 48S preinitiation complex	K03252	EIF3C; translation initiation factor 3 subunit C	None	802.311	0.747559	0.275132	2.7171	0.00658574	0.0141927	802.311	0.567065	0.274922	2.06264	0.039147	0.0681157	802.311	0.169646	0.274481	0.61806	0.536536	0.649272	728	1171	611	583	681	706	553	883	803	684	1113	1173
Am_HQ_64118	F:GO:0003867; C:GO:0005829; P:GO:0006522; P:GO:0006531; P:GO:0009450; P:GO:0019482; F:GO:0030170	F:4-aminobutyrate transaminase activity; C:cytosol; P:alanine metabolic process; P:aspartate metabolic process; P:gamma-aminobutyric acid catabolic process; P:beta-alanine metabolic process; F:pyridoxal phosphate binding	K13524	ABAT; 4-aminobutyrate aminotransferase / (S)-3-amino-2-methylpropionate transaminase [EC:2.6.1.19 2.6.1.22]	A 9100 Metabolism; B 09101 Carbohydrate metabolism; C 00640 Propanoate metabolism [PATH:ko00640]|A 9100 Metabolism; B 09101 Carbohydrate metabolism; C 00650 Butanoate metabolism [PATH:ko00650]|A 9100 Metabolism; B 09105 Amino acid metabolism; C 00250 Alanine, aspartate and glutamate metabolism [PATH:ko00250]|A 9100 Metabolism; B 09105 Amino acid metabolism; C 00280 Valine, leucine and isoleucine …	74.0712	10.7691	4.24739	2.53545	0.0112302	0.0228324	74.0712	10.7578	4.24739	2.5328	0.0113155	0.0227628	74.0712	10.7805	4.24739	2.53816	0.0111438	0.0258049	9	86	637	0	0	0	0	0	0	0	0	0
Am_HQ_43365	F:GO:0000149; F:GO:0005545; F:GO:0005546; C:GO:0005905; P:GO:0006900; C:GO:0016021; C:GO:0030136; F:GO:0032050; P:GO:0048268; P:GO:0072583	F:SNARE binding; F:1-phosphatidylinositol binding; F:phosphatidylinositol-4,5-bisphosphate binding; C:clathrin-coated pit; P:vesicle budding from membrane; C:integral component of membrane; C:clathrin-coated vesicle; F:clathrin heavy chain binding; P:clathrin coat assembly; P:clathrin-dependent endocytosis	K20043	SNAP91, AP180, CALM; clathrin coat assembly protein AP180	None	74.7628	7.51478	2.72807	2.75462	0.00587605	0.0128044	74.7628	6.16181	2.68337	2.29629	0.0216591	0.0404926	74.7628	10.7663	2.9034	3.70818	0.000208753	0.000771538	614.51	0	26.4	0	4.79	0	0	9.43	4.85	0	0	0
Am_HQ_33669	P:GO:0009987; P:GO:0048731	P:cellular process; P:system development	.	.	.	71.9503	10.7271	4.2474	2.52557	0.0115511	0.0234331	71.9503	10.7159	4.2474	2.52292	0.0116385	0.0233299	71.9503	10.7386	4.2474	2.52827	0.0114626	0.0264405	409.3	0	243.56	0	0	0	0	0	0	0	0	0
Am_HQ_10305	C:GO:0005684; P:GO:0006396	C:U2-type spliceosomal complex; P:RNA processing	K13217	PRPF39, PRP39; pre-mRNA-processing factor 39	None	139.47	-1.18236	1.56662	-0.754718	0.450418	0.548183	139.47	-0.493248	1.56715	-0.314741	0.752958	0.816592	139.47	0.812189	1.56912	0.517609	0.604731	0.70991	161.84	0	78.46	213.21	285.48	288.6	228.66	129.61	103.58	55.93	138.54	0
Am_HQ_40746	P:GO:0009117; C:GO:0016020; P:GO:0046373; F:GO:0046556	P:nucleotide metabolic process; C:membrane; P:L-arabinose metabolic process; F:alpha-L-arabinofuranosidase activity	K01209	abfA; alpha-L-arabinofuranosidase [EC:3.2.1.55]	A 9100 Metabolism; B 09101 Carbohydrate metabolism; C 00520 Amino sugar and nucleotide sugar metabolism [PATH:ko00520]	4006.43	-8.58851	3.40575	-2.52177	0.0116767	0.0236532	4006.43	-16.102	3.40468	-4.72939	2.25194e-06	9.98404e-06	4006.43	0	3.60268	0	1	1	0	0	0	0	269	2	35144.7	6343.85	5335	0	0	0
Am_HQ_53997	F:GO:0005506; P:GO:0007275; P:GO:0010268; C:GO:0016021; P:GO:0016125; P:GO:0016132; F:GO:0016709; F:GO:0020037	F:iron ion binding; P:multicellular organism development; P:brassinosteroid homeostasis; C:integral component of membrane; P:sterol metabolic process; P:brassinosteroid biosynthetic process; F:oxidoreductase activity, acting on paired donors, with incorporation or reduction of molecular oxygen, NAD(P)H as one donor, and incorporation of one atom of oxygen; F:heme binding	K12637	CYP90C1, ROT3; 3-epi-6-deoxocathasterone 23-monooxygenase [EC:1.14.14.147]	A 9100 Metabolism; B 09109 Metabolism of terpenoids and polyketides; C 00905 Brassinosteroid biosynthesis [PATH:ko00905]	125.054	7.30523	0.916382	7.97182	1.56354e-15	2.14337e-14	125.054	6.77275	0.881778	7.68078	1.58117e-14	2.41024e-13	125.054	10.5515	1.42179	7.4213	1.1598e-13	2.5784e-12	115	388	725	2	6	2	8	3	3	0	1	0
Am_HQ_70806	F:GO:0004601; C:GO:0005576; P:GO:0006804; P:GO:0006979; C:GO:0009505; C:GO:0009506; F:GO:0020037; P:GO:0042744; F:GO:0046872; P:GO:0098869	F:peroxidase activity; C:extracellular region; P:obsolete peroxidase reaction; P:response to oxidative stress; C:plant-type cell wall; C:plasmodesma; F:heme binding; P:hydrogen peroxide catabolic process; F:metal ion binding; P:cellular oxidant detoxification	K00430	E1.11.1.7; peroxidase [EC:1.11.1.7]	A 9100 Metabolism; B 09110 Biosynthesis of other secondary metabolites; C 00940 Phenylpropanoid biosynthesis [PATH:ko00940]	641.654	-10.9001	1.27795	-8.52942	1.4708e-17	2.43277e-16	641.654	-11.1051	1.27788	-8.6903	3.61488e-18	8.66396e-17	641.654	-12.8165	1.27752	-10.0323	1.09891e-23	8.14886e-22	0	0	0	711.93	347.04	319.01	590.41	444.75	557.22	2662.39	1364.92	1296.49
Am_HQ_1032	.	.	.	.	.	184.148	-1.38918	0.644953	-2.15393	0.0312457	0.0565078	184.148	-0.816391	0.645885	-1.26399	0.206234	0.286141	184.148	-0.858168	0.64575	-1.32895	0.183865	0.278692	35.45	101.24	120.28	148.76	339.33	400.42	77.13	259.66	269.29	77.6	311.67	220.28
Am_HQ_88230	C:GO:0016020	C:membrane	.	.	.	7624.91	-12.5003	1.56167	-8.00441	1.2004e-15	1.66623e-14	7624.91	-15.9503	1.5616	-10.2141	1.715e-24	8.11522e-23	7624.91	-2.07197	1.6676	-1.24249	0.214057	0.315643	1	0	0	260	3670	4678	29243	31213	29264	6	0	0
Am_HQ_10329	F:GO:0003924; F:GO:0005525; C:GO:0005737; F:GO:0008017; C:GO:0016020; C:GO:0045298	F:GTPase activity; F:GTP binding; C:cytoplasm; F:microtubule binding; C:membrane; C:tubulin complex	K17065	DNM1L; dynamin 1-like protein [EC:3.6.5.5]	A 9130 Environmental Information Processing; B 09132 Signal transduction; C 04668 TNF signaling pathway [PATH:ko04668]|A 9140 Cellular Processes; B 09141 Transport and catabolism; C 04139 Mitophagy - yeast [PATH:ko04139]|A 9140 Cellular Processes; B 09143 Cell growth and death; C 04214 Apoptosis - fly [PATH:ko04214]|A 9140 Cellular Processes; B 09143 Cell growth and death; C 04217 Necroptosis [PA…	239.86	-0.0796765	0.761326	-0.104655	0.91665	0.942364	239.86	-0.0448865	0.761383	-0.0589539	0.952989	0.966504	239.86	0.231058	0.761698	0.303346	0.761626	0.836502	267.07	257.98	63.47	379.81	312.27	116.82	290.38	392.06	108.72	285.82	297.28	89.02
Am_HQ_1033	F:GO:0005488; F:GO:0016491	F:binding; F:oxidoreductase activity	.	.	.	135.686	-1.25513	0.460974	-2.72279	0.00647339	0.013986	135.686	-0.532102	0.463215	-1.14871	0.250674	0.337459	135.686	-0.523005	0.463137	-1.12927	0.258786	0.368779	74.47	71.53	64.12	164.2	194.45	327.82	58.79	117.7	246.35	100.47	133.42	177.38
Am_HQ_10330	.	.	.	.	.	168.689	-2.42767	1.46904	-1.65256	0.0984204	0.153855	168.689	-0.298875	1.47118	-0.203154	0.839015	0.883094	168.689	-1.48065	1.46961	-1.00752	0.313687	0.429642	0	115.12	55.48	227.08	507.22	404.12	0	138.86	137.34	205.12	210.75	175.5
Am_HQ_10334	F:GO:0003777; F:GO:0005524; C:GO:0005871; C:GO:0005874; P:GO:0007018; F:GO:0008017; F:GO:0016887; C:GO:0045298	F:microtubule motor activity; F:ATP binding; C:kinesin complex; C:microtubule; P:microtubule-based movement; F:microtubule binding; F:ATP hydrolysis activity; C:tubulin complex	K10393	KIF2_24, MCAK; kinesin family member 2/24	A 9150 Organismal Systems; B 09158 Development and regeneration; C 04361 Axon regeneration [PATH:ko04361]	975.623	-0.597381	0.937875	-0.636952	0.524156	0.619733	975.623	-0.680238	0.93786	-0.725309	0.468263	0.563292	975.623	-0.614422	0.937868	-0.655126	0.512387	0.62775	475.53	1052.52	206.73	992.3	1977.86	301.8	894.06	2374.65	279.5	991.93	2146.39	284.2
Am_HQ_50786	.	.	.	.	.	49.5683	10.1899	2.83909	3.58914	0.000331776	0.00095364	49.5683	10.1786	2.83909	3.58517	0.000336857	0.000975734	49.5683	10.2013	2.83909	3.59318	0.000326667	0.00115021	6	59	425	0	0	0	0	0	0	0	0	0
Am_HQ_22519	P:GO:0000002; F:GO:0003690; F:GO:0003697; F:GO:0003994; C:GO:0005829; P:GO:0019643; C:GO:0042645; P:GO:0046487; F:GO:0046872; F:GO:0051539	P:mitochondrial genome maintenance; F:double-stranded DNA binding; F:single-stranded DNA binding; F:aconitate hydratase activity; C:cytosol; P:reductive tricarboxylic acid cycle; C:mitochondrial nucleoid; P:glyoxylate metabolic process; F:metal ion binding; F:4 iron, 4 sulfur cluster binding	K01681	ACO, acnA; aconitate hydratase [EC:4.2.1.3]	A 9100 Metabolism; B 09101 Carbohydrate metabolism; C 00020 Citrate cycle (TCA cycle) [PATH:ko00020]|A 9100 Metabolism; B 09101 Carbohydrate metabolism; C 00630 Glyoxylate and dicarboxylate metabolism [PATH:ko00630]|A 9100 Metabolism; B 09102 Energy metabolism; C 00720 Carbon fixation pathways in prokaryotes [PATH:ko00720]	48.2951	10.1523	3.00555	3.37784	0.000730569	0.00194625	48.2951	10.141	3.00555	3.3741	0.000740581	0.00197363	48.2951	10.1638	3.00555	3.38166	0.000720486	0.00233074	4	31	440	0	0	0	0	0	0	0	0	0
Am_HQ_67602	P:GO:0016042; F:GO:0016788	P:lipid catabolic process; F:hydrolase activity, acting on ester bonds	K01052	LIPA; lysosomal acid lipase/cholesteryl ester hydrolase [EC:3.1.1.13]	A 9100 Metabolism; B 09103 Lipid metabolism; C 00100 Steroid biosynthesis [PATH:ko00100]|A 9140 Cellular Processes; B 09141 Transport and catabolism; C 04142 Lysosome [PATH:ko04142]|A 9150 Organismal Systems; B 09154 Digestive system; C 04979 Cholesterol metabolism [PATH:ko04979]	3015.95	-7.58482	3.3462	-2.2667	0.0234087	0.0438288	3015.95	-15.695	3.344	-4.69349	2.68586e-06	1.17599e-05	3015.95	0	3.54539	0	1	1	0	0	0	1	134	0	26375.2	5044.91	3911.39	0	0	0
Am_HQ_48000	F:GO:0004322; F:GO:0005507; C:GO:0005886; P:GO:0006118; P:GO:0006826; F:GO:0008447; P:GO:0015994; P:GO:0019852; P:GO:0055072	F:ferroxidase activity; F:copper ion binding; C:plasma membrane; P:obsolete electron transport; P:iron ion transport; F:L-ascorbate oxidase activity; P:chlorophyll metabolic process; P:L-ascorbic acid metabolic process; P:iron ion homeostasis	K00423	E1.10.3.3; L-ascorbate oxidase [EC:1.10.3.3]	A 9100 Metabolism; B 09101 Carbohydrate metabolism; C 00053 Ascorbate and aldarate metabolism [PATH:ko00053]	2707.38	-21.0655	3.68232	-5.72073	1.06069e-08	6.31274e-08	2707.38	-27.8218	3.68145	-7.55729	4.11557e-14	5.87648e-13	2707.38	-12.6798	3.86529	-3.28043	0.00103651	0.00320435	0	0	0	0	308	0	23252	4966	3369	0	0	1
Am_HQ_10363	F:GO:0005524; P:GO:0019538	F:ATP binding; P:protein metabolic process	K03696	clpC; ATP-dependent Clp protease ATP-binding subunit ClpC	None	15604.8	-2.33451	0.454816	-5.13286	2.85377e-07	1.37872e-06	15604.8	-0.256121	0.454876	-0.563058	0.573395	0.663675	15604.8	0.23238	0.454904	0.510832	0.609469	0.713803	7695.5	3212.63	7325.54	52911.8	25603.8	48361.8	4920.74	11814.6	14070.4	6719.22	6955.46	7883.47
Am_HQ_50423	F:GO:0005507; P:GO:0006118; F:GO:0008447; P:GO:0019852	F:copper ion binding; P:obsolete electron transport; F:L-ascorbate oxidase activity; P:L-ascorbic acid metabolic process	K00423	E1.10.3.3; L-ascorbate oxidase [EC:1.10.3.3]	A 9100 Metabolism; B 09101 Carbohydrate metabolism; C 00053 Ascorbate and aldarate metabolism [PATH:ko00053]	2336.84	-8.27415	2.87505	-2.87791	0.00400318	0.00907584	2336.84	-15.3213	2.87347	-5.33199	9.71444e-08	5.39847e-07	2336.84	-0.533597	3.10553	-0.171822	0.863578	0.912075	0	0	0	0	216	2	20070	4305	2943	0	0	1
Am_HQ_30056	F:GO:0005509; C:GO:0005783; C:GO:0016021	F:calcium ion binding; C:endoplasmic reticulum; C:integral component of membrane	K23901	CALU; calumenin	None	50.4138	10.1476	1.65004	6.14987	7.75447e-10	5.35495e-09	50.4138	4.40751	1.18596	3.7164	0.000202085	0.000613753	50.4138	10.159	1.65004	6.15683	7.42147e-10	8.86964e-09	238.74	36.84	169.28	0	0	0	8.37	2.88	18.59	0	0	0
Am_HQ_63390	P:GO:0005975; F:GO:0008422; P:GO:0009651; P:GO:0019762; F:GO:0102483	P:carbohydrate metabolic process; F:beta-glucosidase activity; P:response to salt stress; P:glucosinolate catabolic process; F:scopolin beta-glucosidase activity	K01188	E3.2.1.21; beta-glucosidase [EC:3.2.1.21]	A 9100 Metabolism; B 09101 Carbohydrate metabolism; C 00500 Starch and sucrose metabolism [PATH:ko00500]|A 9100 Metabolism; B 09106 Metabolism of other amino acids; C 00460 Cyanoamino acid metabolism [PATH:ko00460]|A 9100 Metabolism; B 09110 Biosynthesis of other secondary metabolites; C 00999 Biosynthesis of various plant secondary metabolites [PATH:ko00999]	1045.21	11.0081	1.37167	8.0253	1.01279e-15	1.41471e-14	1045.21	1.77022	1.21387	1.45833	0.14475	0.211791	1045.21	9.79102	1.28339	7.62905	2.36493e-14	5.84567e-13	97	549	7293	4	0	1	413	1707	1035	1	6	5
Am_HQ_85023	.	.	K13434	PTI6; pathogenesis-related genes transcriptional activator PTI6	A 9150 Organismal Systems; B 09159 Environmental adaptation; C 04626 Plant-pathogen interaction [PATH:ko04626]	38.986	9.77933	1.81135	5.39891	6.70459e-08	3.55591e-07	38.986	4.46217	1.41039	3.16378	0.00155732	0.00385587	38.986	9.79081	1.81135	5.40525	6.47176e-08	5.42538e-07	176.59	11.49	156.35	0	0	0	2.26	7.51	12.62	0	0	0
Am_HQ_10385	F:GO:0004843; C:GO:0005829; F:GO:0016807; P:GO:0071108; F:GO:1990380	F:cysteine-type deubiquitinase activity; C:cytosol; F:cysteine-type carboxypeptidase activity; P:protein K48-linked deubiquitination; F:Lys48-specific deubiquitinase activity	K01309	MINDY1_2; ubiquitin carboxyl-terminal hydrolase MINDY-1/2 [EC:3.4.19.12]	None	157.493	-0.283397	1.12385	-0.252167	0.800912	0.855127	157.493	0.19927	1.12452	0.177205	0.859348	0.898291	157.493	-0.3957	1.12371	-0.352138	0.724735	0.808603	0	274.4	102.71	203.53	120.42	248.73	64.19	148.73	205.39	264.69	187.74	160.97
Am_HQ_50859	F:GO:0000166; F:GO:0003938; P:GO:0006144; P:GO:0006177; C:GO:0042720; F:GO:0046872	F:nucleotide binding; F:IMP dehydrogenase activity; P:purine nucleobase metabolic process; P:GMP biosynthetic process; C:mitochondrial inner membrane peptidase complex; F:metal ion binding	K00088	IMPDH, guaB; IMP dehydrogenase [EC:1.1.1.205]	A 9100 Metabolism; B 09104 Nucleotide metabolism; C 00230 Purine metabolism [PATH:ko00230]|A 9100 Metabolism; B 09111 Xenobiotics biodegradation and metabolism; C 00983 Drug metabolism - other enzymes [PATH:ko00983]	33.195	9.61137	3.15663	3.04482	0.00232821	0.0055642	33.195	9.60012	3.15663	3.04125	0.00235597	0.00559989	33.195	9.62285	3.15663	3.04845	0.00230021	0.00646119	4	18	304	0	0	0	0	0	0	0	0	0
Am_HQ_82142	F:GO:0004553; C:GO:0005618; P:GO:0010411; F:GO:0016762; P:GO:0042546; C:GO:0048046; P:GO:0071555	F:hydrolase activity, hydrolyzing O-glycosyl compounds; C:cell wall; P:xyloglucan metabolic process; F:xyloglucan:xyloglucosyl transferase activity; P:cell wall biogenesis; C:apoplast; P:cell wall organization	K08235	E2.4.1.207; xyloglucan:xyloglucosyl transferase [EC:2.4.1.207]	None	2101.67	-5.13928	1.23492	-4.16162	3.15992e-05	0.000110243	2101.67	-15.178	1.2021	-12.6262	1.51409e-36	2.02777e-34	2101.67	-0.533693	1.68301	-0.317106	0.751164	0.829131	0	0	0	11	6	9	7127	10137	10116	1	0	0
Am_HQ_10388	P:GO:0007010; C:GO:0015629; P:GO:0030835; P:GO:0051014; F:GO:0051015	P:cytoskeleton organization; C:actin cytoskeleton; P:negative regulation of actin filament depolymerization; P:actin filament severing; F:actin filament binding	K05761	VIL1; villin 1	None	392.939	0.965122	0.596015	1.61929	0.105384	0.162977	392.939	0.551807	0.595496	0.926634	0.354116	0.448877	392.939	-0.0246415	0.594936	-0.0414188	0.966962	0.983609	184.16	777.41	290.03	142.3	509.19	146.01	362.37	340.81	367.6	466.81	609.65	554.82
Am_HQ_104	.	.	.	.	.	374.419	0.879873	0.898078	0.97973	0.327219	0.421897	374.419	1.89286	0.899074	2.10534	0.0352618	0.0621831	374.419	1.42518	0.898504	1.58617	0.112702	0.186385	1009.11	421.96	162.43	526.31	502.18	139.2	129.15	394.64	73.12	352.83	396.92	74.53
Am_HQ_1040	.	.	K14005	SEC31; protein transport protein SEC31	A 9120 Genetic Information Processing; B 09123 Folding, sorting and degradation; C 04141 Protein processing in endoplasmic reticulum [PATH:ko04141]	663.688	-0.00232018	0.253175	-0.00916434	0.992688	0.995438	663.688	0.279889	0.25356	1.10384	0.269664	0.359062	663.688	0.497297	0.253847	1.95904	0.0501079	0.0935443	666.04	447.29	687.39	764.1	848.9	829.25	536.93	736.07	741.33	503.61	671.2	568.23
Am_HQ_88430	.	.	.	.	.	29.4845	9.44018	4.24791	2.22231	0.0262623	0.0484589	29.4845	9.42892	4.24791	2.21966	0.0264417	0.048338	29.4845	9.45166	4.24791	2.22501	0.0260803	0.0536363	0	26	265	0	0	0	0	0	0	0	0	0
Am_HQ_80098	P:GO:0009686; P:GO:0045487; F:GO:0046872; F:GO:0052634	P:gibberellin biosynthetic process; P:gibberellin catabolic process; F:metal ion binding; F:C-19 gibberellin 2-beta-dioxygenase activity	K04125	GA2ox; gibberellin 2beta-dioxygenase [EC:1.14.11.13]	A 9100 Metabolism; B 09109 Metabolism of terpenoids and polyketides; C 00904 Diterpenoid biosynthesis [PATH:ko00904]	678.89	5.5871	0.636205	8.78192	1.60711e-18	2.93747e-17	678.89	2.95761	0.627547	4.71296	2.44142e-06	1.07686e-05	678.89	9.59328	0.774335	12.3891	2.99503e-35	6.12816e-33	1457	466	3713	60	40	60	238	362	396	4	3	3
Am_HQ_10406	P:GO:0006506; C:GO:0030176; F:GO:0051267	P:GPI anchor biosynthetic process; C:integral component of endoplasmic reticulum membrane; F:CP2 mannose-ethanolamine phosphotransferase activity	K05310	PIGG, GPI7; ethanolamine phosphate transferase 2 subunit G [EC:2.7.-.-]	A 9100 Metabolism; B 09107 Glycan biosynthesis and metabolism; C 00563 Glycosylphosphatidylinositol (GPI)-anchor biosynthesis [PATH:ko00563]	183.959	0.298877	0.189975	1.57324	0.115663	0.176223	183.959	0.394549	0.190758	2.06833	0.0386094	0.0673129	183.959	0.0304194	0.188188	0.161644	0.871586	0.916809	136	183	189	163	173	215	129	163	224	208	216	242
Am_HQ_65354	.	.	.	.	.	30.8683	9.50657	3.22276	2.94982	0.00317957	0.00736887	30.8683	9.49531	3.22276	2.94633	0.0032157	0.00738905	30.8683	9.51805	3.22276	2.95338	0.0031431	0.00853062	1	82	227	0	0	0	0	0	0	0	0	0
Am_HQ_10413	P:GO:0006486; C:GO:0016021; F:GO:0016757	P:protein glycosylation; C:integral component of membrane; F:glycosyltransferase activity	.	.	.	411.214	0.0456861	0.468797	0.097454	0.922366	0.946238	411.214	0.138245	0.468938	0.294804	0.768143	0.828668	411.214	-0.438287	0.468265	-0.93598	0.349284	0.467501	224	610	149	421	372	431	239	413	517	745	393	587
Am_HQ_51258	F:GO:0004857; C:GO:0005576; C:GO:0005618; P:GO:0005982; P:GO:0005985; F:GO:0030599; P:GO:0042545; P:GO:0043086; F:GO:0045330; P:GO:0045490	F:enzyme inhibitor activity; C:extracellular region; C:cell wall; P:starch metabolic process; P:sucrose metabolic process; F:pectinesterase activity; P:cell wall modification; P:negative regulation of catalytic activity; F:aspartyl esterase activity; P:pectin catabolic process	K01051	E3.1.1.11; pectinesterase [EC:3.1.1.11]	A 9100 Metabolism; B 09101 Carbohydrate metabolism; C 00040 Pentose and glucuronate interconversions [PATH:ko00040]|A 9130 Environmental Information Processing; B 09132 Signal transduction; C 02020 Two-component system [PATH:ko02020]	1948.42	-7.47379	3.33511	-2.24094	0.0250297	0.0465225	1948.42	-15.0625	3.33273	-4.51956	6.19695e-06	2.55867e-05	1948.42	0	3.53476	0	1	1	0	0	0	1	123.64	0	17086	3391.21	2282.31	0	0	0
Am_HQ_54914	C:GO:0043231; F:GO:0080043; F:GO:0080044	C:intracellular membrane-bounded organelle; F:quercetin 3-O-glucosyltransferase activity; F:quercetin 7-O-glucosyltransferase activity	.	.	.	1657.79	-9.98384	1.71988	-5.80496	6.43796e-09	3.95403e-08	1657.79	-12.9639	1.71952	-7.53927	4.72603e-14	6.6946e-13	1657.79	-12.5564	1.71953	-7.30221	2.83082e-13	5.94069e-12	0	1	0	127	1250	9	4319	3537	3318	3362	453	4999
Am_HQ_60579	F:GO:0005351; C:GO:0005887; P:GO:0034219; P:GO:1902600	F:carbohydrate:proton symporter activity; C:integral component of plasma membrane; P:carbohydrate transmembrane transport; P:proton transmembrane transport	K24193	STP; MFS transporter, SP family, sugar:H+ symporter	None	1811.48	-8.3144	2.59932	-3.19868	0.00138059	0.00346802	1811.48	-14.9503	2.59763	-5.75538	8.64496e-09	5.76278e-08	1811.48	-1.39048	2.79588	-0.497329	0.618957	0.721855	0	0	0	1	222	1	15672	2995	2437	0	0	2
Am_HQ_10421	.	.	.	.	.	126.305	-9.31543	1.66712	-5.58773	2.30058e-08	1.30589e-07	126.305	-0.953607	1.79024	-0.53267	0.594262	0.682607	126.305	-2.66763	1.70468	-1.56489	0.117609	0.193258	0	2	0	210.91	764.42	662.64	0	5	0	10.38	6.47	0
Am_HQ_81294	C:GO:0005886; C:GO:0016021; F:GO:0022857; P:GO:0055085	C:plasma membrane; C:integral component of membrane; F:transmembrane transporter activity; P:transmembrane transport	.	.	.	111.989	11.3636	1.82061	6.24165	4.32969e-10	3.09436e-09	111.989	11.3524	1.82061	6.23547	4.50421e-10	3.66473e-09	111.989	9.50648	1.72043	5.52564	3.2828e-08	2.92986e-07	670.46	93.29	257.38	0	0	0	0.06	0	0	0	2	0
Am_HQ_44928	C:GO:0005886; P:GO:0010167; F:GO:0015112; P:GO:0015706; C:GO:0016021; P:GO:0046686; P:GO:0055085	C:plasma membrane; P:response to nitrate; F:nitrate transmembrane transporter activity; P:nitrate transmembrane transport; C:integral component of membrane; P:response to cadmium ion; P:transmembrane transport	.	.	.	113.418	11.3298	1.8943	5.98101	2.21758e-09	1.44726e-08	113.418	4.75607	1.49697	3.17713	0.00148738	0.0037047	113.418	9.49172	1.80204	5.26719	1.38524e-07	1.07786e-06	1	278	817	0	0	0	18	13	21	0	1	1
Am_HQ_1043	C:GO:0000932; F:GO:0003676; F:GO:0004535; F:GO:0005506; F:GO:0005524; C:GO:0005634; C:GO:0030015; P:GO:0043928; P:GO:0090503	C:P-body; F:nucleic acid binding; F:poly(A)-specific ribonuclease activity; F:iron ion binding; F:ATP binding; C:nucleus; C:CCR4-NOT core complex; P:exonucleolytic catabolism of deadenylated mRNA; P:RNA phosphodiester bond hydrolysis, exonucleolytic	K11643	CHD4, MI2B; chromodomain-helicase-DNA-binding protein 4 [EC:5.6.2.-]	A 9160 Human Diseases; B 09161 Cancer: overview; C 05203 Viral carcinogenesis [PATH:ko05203]|A 9160 Human Diseases; B 09172 Infectious disease: viral; C 05165 Human papillomavirus infection [PATH:ko05165]	208.647	-0.923295	0.450867	-2.04782	0.0405775	0.0711822	208.647	-0.614382	0.451536	-1.36065	0.173625	0.247357	208.647	-0.57909	0.451549	-1.28245	0.199684	0.298129	96.4	152.99	98.52	266.42	272.01	335.87	81.44	323.24	323.38	150.29	247.25	297.45
Am_HQ_88787	F:GO:0016491	F:oxidoreductase activity	.	.	.	793.892	10.1693	0.963669	10.5527	4.93612e-26	1.75086e-24	793.892	9.21222	0.873116	10.551	5.02727e-26	2.72955e-24	793.892	1.02874	0.76343	1.34753	0.17781	0.271282	2630.55	1534.03	864.3	2.79	1	1.71	0.02	8	4.29	329.79	1258.49	1871.25
Am_HQ_79981	P:GO:0006555; F:GO:0008782; P:GO:0009116; C:GO:0016021	P:methionine metabolic process; F:adenosylhomocysteine nucleosidase activity; P:nucleoside metabolic process; C:integral component of membrane	.	.	.	1655.28	-10.7473	2.72294	-3.94693	7.91596e-05	0.000255591	1655.28	-14.7473	2.72266	-5.41651	6.07733e-08	3.49732e-07	1655.28	0	2.96653	0	1	1	0	0	0	1	1194	16	7337	5092	7487	0	0	0
Am_HQ_10443	F:GO:0003677; F:GO:0004386	F:DNA binding; F:helicase activity	.	.	.	327.085	-0.472138	0.50466	-0.935557	0.349502	0.445274	327.085	0.471188	0.50598	0.931238	0.35173	0.446313	327.085	0.168177	0.50542	0.332747	0.739325	0.819667	346	224	210	532	452	486	87	348	361	179	381	399
Am_HQ_10452	F:GO:0016787; C:GO:0110165	F:hydrolase activity; C:cellular anatomical entity	.	.	.	202.371	-0.213714	0.236361	-0.904184	0.365898	0.462829	202.371	-0.0201362	0.237267	-0.084867	0.932367	0.951576	202.371	0.170349	0.238069	0.715544	0.474273	0.591849	180.33	171.81	131	199.01	251.11	307.78	153.87	253.94	254.23	186.08	185.39	210.1
Am_HQ_86793	C:GO:0005576; P:GO:0019953	C:extracellular region; P:sexual reproduction	.	.	.	31702.1	13.8873	0.874866	15.8736	9.64725e-57	2.04985e-54	31702.1	13.5146	0.865152	15.621	5.23542e-55	2.26848e-52	31702.1	9.44947	0.831942	11.3583	6.74274e-30	9.31256e-28	150218	35438.6	108833	19.27	6	1	10.79	10	14.01	232.46	52.67	313.94
Am_HQ_85782	F:GO:0046872; F:GO:0051213	F:metal ion binding; F:dioxygenase activity	K05933	E1.14.17.4; aminocyclopropanecarboxylate oxidase [EC:1.14.17.4]	A 9100 Metabolism; B 09105 Amino acid metabolism; C 00270 Cysteine and methionine metabolism [PATH:ko00270]	2994.77	13.2531	0.846766	15.6514	3.24911e-55	6.24337e-53	2994.77	9.29989	0.478392	19.4399	3.54861e-84	5.2278e-81	2994.77	9.43107	0.481077	19.6041	1.42709e-85	3.94199e-82	11920.5	12074.3	4932.54	2	0	1.7	16	16.93	28.92	16.7	12.92	27
Am_HQ_1046	.	.	.	.	.	2780.81	0.601576	0.257781	2.33367	0.0196129	0.0374563	2780.81	0.523361	0.257759	2.03043	0.042313	0.0730493	2780.81	0.559754	0.257761	2.1716	0.0298859	0.0603233	3823.71	2708.84	2231.02	2605.46	2340.95	2934.22	2695.33	2724.24	2775.89	2645.77	2876.62	2621.87
Am_HQ_10461	P:GO:0009987	P:cellular process	.	.	.	158.403	0.121792	0.434597	0.280242	0.779292	0.837458	158.403	0.465419	0.435863	1.06781	0.285605	0.376435	158.403	0.14264	0.434616	0.328198	0.742762	0.822735	99.37	219.54	126.74	212.98	133.05	187.34	74.99	123.52	234.03	161.61	233.27	132.98
Am_HQ_52020	F:GO:0003962; P:GO:0006555; P:GO:0019346; F:GO:0030170	F:cystathionine gamma-synthase activity; P:methionine metabolic process; P:transsulfuration; F:pyridoxal phosphate binding	K01739	metB; cystathionine gamma-synthase [EC:2.5.1.48]	A 9100 Metabolism; B 09102 Energy metabolism; C 00920 Sulfur metabolism [PATH:ko00920]|A 9100 Metabolism; B 09105 Amino acid metabolism; C 00270 Cysteine and methionine metabolism [PATH:ko00270]|A 9100 Metabolism; B 09106 Metabolism of other amino acids; C 00450 Selenocompound metabolism [PATH:ko00450]	340.021	-7.71874	1.2833	-6.01477	1.80142e-09	1.18865e-08	340.021	-9.20759	1.27994	-7.19376	6.30326e-13	7.73394e-12	340.021	-12.3442	1.27826	-9.65705	4.58876e-22	2.89721e-20	0	0	0	72.61	45.64	33.48	191.18	145.46	81.28	1252.35	1383.97	1219.85
Am_HQ_73145	F:GO:0016491	F:oxidoreductase activity	.	.	.	161.496	10.038	1.39796	7.18046	6.94748e-13	7.04682e-12	161.496	9.09208	1.25568	7.24074	4.46236e-13	5.58692e-12	161.496	0.224703	0.754218	0.297928	0.765758	0.839515	344.04	377.99	123.43	0	0	1.29	1.98	0	0	126.34	316.45	544.64
Am_HQ_10478	F:GO:0004672; F:GO:0005524; P:GO:0006468; C:GO:0016021	F:protein kinase activity; F:ATP binding; P:protein phosphorylation; C:integral component of membrane	.	.	.	698.347	0.139363	2.46004	0.0566508	NA	NA	698.347	0.957883	2.46017	0.389356	NA	NA	698.347	0.358502	2.46007	0.145728	NA	NA	6.62	2354.65	5.12	11.46	2437.49	11.27	11.15	1469.6	20.12	20.09	2165.36	10.47
Am_HQ_10479	F:GO:0005049; C:GO:0005635; C:GO:0005829; P:GO:0006606; P:GO:0006611; P:GO:0007165	F:nuclear export signal receptor activity; C:nuclear envelope; C:cytosol; P:protein import into nucleus; P:protein export from nucleus; P:signal transduction	K18423	CSE1, CAS, XPO2; exportin-2 (importin alpha re-exporter)	A 9120 Genetic Information Processing; B 09122 Translation; C 03013 Nucleocytoplasmic transport [PATH:ko03013]|A 9160 Human Diseases; B 09171 Infectious disease: bacterial; C 05132 Salmonella infection [PATH:ko05132]	177.025	1.17733	2.90911	0.404706	0.685694	0.761545	177.025	1.66819	2.90945	0.573372	0.566393	0.657396	177.025	0.894107	2.90896	0.307363	0.758567	0.834303	462.95	259.69	0	197.44	223.14	0	127.32	173.24	0	249.25	285.29	0
Am_HQ_51410	F:GO:0005351; C:GO:0005887; P:GO:0034219; P:GO:1902600	F:carbohydrate:proton symporter activity; C:integral component of plasma membrane; P:carbohydrate transmembrane transport; P:proton transmembrane transport	K24193	STP; MFS transporter, SP family, sugar:H+ symporter	None	1271.55	-5.63678	4.16944	-1.35193	0.176398	0.251698	1271.55	-14.4509	4.16262	-3.47159	0.000517384	0.00143147	1271.55	0	4.32606	0	1	1	0	0	0	0	34.79	0	11255.7	2128.14	1498.59	0	0	0
Am_HQ_10486	F:GO:0003825; F:GO:0004805; C:GO:0005739; C:GO:0005829; P:GO:0005982; P:GO:0005985; P:GO:0005992; P:GO:0016311; P:GO:0070413	F:alpha,alpha-trehalose-phosphate synthase (UDP-forming) activity; F:trehalose-phosphatase activity; C:mitochondrion; C:cytosol; P:starch metabolic process; P:sucrose metabolic process; P:trehalose biosynthetic process; P:dephosphorylation; P:trehalose metabolism in response to stress	K16055	TPS; trehalose 6-phosphate synthase/phosphatase [EC:2.4.1.15 3.1.3.12]	A 9100 Metabolism; B 09101 Carbohydrate metabolism; C 00500 Starch and sucrose metabolism [PATH:ko00500]	1313.84	0.896732	0.480855	1.86487	0.0621998	0.103384	1313.84	0.711101	0.480784	1.47904	0.139128	0.204868	1313.84	0.866037	0.480835	1.80111	0.0716857	0.126932	1101.01	2043.98	1688.43	1149.07	1259.72	958.87	535.01	1881.71	1564.7	554.26	1745.12	1209.54
Am_HQ_10487	F:GO:0008270; F:GO:0016874	F:zinc ion binding; F:ligase activity	K10144	RCHY1, PIRH2; RING finger and CHY zinc finger domain-containing protein 1 [EC:2.3.2.27]	A 9120 Genetic Information Processing; B 09123 Folding, sorting and degradation; C 04120 Ubiquitin mediated proteolysis [PATH:ko04120]|A 9140 Cellular Processes; B 09143 Cell growth and death; C 04115 p53 signaling pathway [PATH:ko04115]|A 9160 Human Diseases; B 09172 Infectious disease: viral; C 05162 Measles [PATH:ko05162]	1087.9	-0.599444	4.08065	-0.146899	NA	NA	1087.9	0.185752	4.0807	0.0455196	NA	NA	1087.9	-1.29451	4.08062	-0.317234	NA	NA	1618.87	0	0	3439.58	0	0	1832.16	0	0	5841.21	0	10.55
Am_HQ_10491	.	.	.	.	.	146.66	-0.682137	0.447995	-1.52265	0.127847	0.191901	146.66	0.17244	0.450833	0.382491	0.702097	0.775437	146.66	-0.0533224	0.449819	-0.118542	0.905638	0.942222	106.49	123.35	87.44	250.86	218.56	199.63	40.73	161.36	186.11	132.77	170.34	136.73
Am_HQ_58963	F:GO:0030570; P:GO:0045490; F:GO:0046872	F:pectate lyase activity; P:pectin catabolic process; F:metal ion binding	K01728	pel; pectate lyase [EC:4.2.2.2]	A 9100 Metabolism; B 09101 Carbohydrate metabolism; C 00040 Pentose and glucuronate interconversions [PATH:ko00040]|A 9140 Cellular Processes; B 09145 Cellular community - prokaryotes; C 02024 Quorum sensing [PATH:ko02024]	1178.36	-6.6776	3.39768	-1.96534	0.0493747	0.0845633	1178.36	-14.3372	3.39362	-4.22475	2.39208e-05	8.85578e-05	1178.36	-0.53357	3.59222	-0.148535	0.881921	0.924642	0	0	0	0	72	0	10462	1926	1352	0	0	1
Am_HQ_79237	.	.	.	.	.	352.784	-6.13927	1.80384	-3.40344	0.000665428	0.00178693	352.784	-9.97161	1.79346	-5.55998	2.69801e-08	1.65521e-07	352.784	-12.3313	1.79282	-6.87819	6.06162e-12	1.02018e-10	0	0	0	2.73	37.61	10	391.4	153.06	150.78	16	2905.89	890.93
Am_HQ_10505	F:GO:0003723; C:GO:0005634; P:GO:0006355; F:GO:0046872	F:RNA binding; C:nucleus; P:regulation of transcription, DNA-templated; F:metal ion binding	.	.	.	115.508	-0.0410391	2.41488	-0.0169943	0.986441	0.991421	115.508	1.03885	2.41581	0.43002	0.667181	0.746122	115.508	1.25881	2.41606	0.521019	0.602354	0.707922	210.79	0	148.1	280.31	0	254.8	91.84	0	157.45	96.76	0	120.65
Am_HQ_10507	P:GO:0002100; F:GO:0004131; P:GO:0006206; F:GO:0052717; C:GO:0052718; F:GO:0102480	P:tRNA wobble adenosine to inosine editing; F:cytosine deaminase activity; P:pyrimidine nucleobase metabolic process; F:tRNA-specific adenosine-34 deaminase activity; C:tRNA-specific adenosine-34 deaminase complex; F:5-fluorocytosine deaminase activity	K15442	TAD3, ADAT3; tRNA-specific adenosine deaminase 3	None	81.4917	-2.18104	2.66077	-0.819704	0.412385	0.510554	81.4917	-0.569673	2.66378	-0.213859	0.830657	0.876384	81.4917	-3.41528	2.65993	-1.28397	0.199151	0.297577	0	49.58	0	0	126.04	156.13	0	0	98.27	43.55	446.13	152.16
Am_HQ_1051	F:GO:0005524; C:GO:0016021; F:GO:0016887	F:ATP binding; C:integral component of membrane; F:ATP hydrolysis activity	.	.	.	6229.23	-0.704291	0.535245	-1.31583	0.188231	0.265932	6229.23	0.42006	0.535317	0.784693	0.432634	0.52875	6229.23	0.460355	0.535318	0.859964	0.389809	0.509278	1384.62	6729.67	7233.28	7895.1	9580.93	15311.2	2116.96	5511.25	7650.77	4301.86	4916.82	5264.8
Am_HQ_10516	C:GO:0000139; F:GO:0005198; P:GO:0006886; P:GO:0016192; C:GO:0030117; C:GO:0030663	C:Golgi membrane; F:structural molecule activity; P:intracellular protein transport; P:vesicle-mediated transport; C:membrane coat; C:COPI-coated vesicle membrane	K17302	COPB2, SEC27; coatomer subunit beta'	None	617.659	-0.184663	0.51937	-0.355553	0.722176	0.791481	617.659	-0.735113	0.519038	-1.4163	0.156688	0.226632	617.659	-0.0822054	0.519436	-0.158259	0.874253	0.918477	112.55	664.3	517.99	430.06	719.49	745.09	567.97	1064.96	1165.22	425.97	538.09	812.48
Am_HQ_81848	F:GO:0004034; P:GO:0006094; P:GO:0006096; F:GO:0030246; P:GO:0033499	F:aldose 1-epimerase activity; P:gluconeogenesis; P:glycolytic process; F:carbohydrate binding; P:galactose catabolic process via UDP-galactose	K01785	galM, GALM; aldose 1-epimerase [EC:5.1.3.3]	A 9100 Metabolism; B 09101 Carbohydrate metabolism; C 00010 Glycolysis / Gluconeogenesis [PATH:ko00010]|A 9100 Metabolism; B 09101 Carbohydrate metabolism; C 00052 Galactose metabolism [PATH:ko00052]	1144.03	-5.92877	3.07668	-1.92701	0.053979	0.0914745	1144.03	-14.2974	3.06913	-4.65847	3.18572e-06	1.379e-05	1144.03	0	3.28739	0	1	1	0	0	0	0	42	1	10157	1858	1358	0	0	0
Am_HQ_74434	C:GO:0016021; F:GO:0022857; P:GO:0055085	C:integral component of membrane; F:transmembrane transporter activity; P:transmembrane transport	K15102	SLC25A3, PHC, PIC; solute carrier family 25 (mitochondrial phosphate transporter), member 3	None	30.0167	9.39438	2.04048	4.60401	4.14426e-06	1.68469e-05	30.0167	4.29476	1.69922	2.52748	0.0114884	0.0230666	30.0167	9.40586	2.04048	4.60964	4.03368e-06	2.2549e-05	9	18	253	0	0	0	10	2	6	0	0	0
Am_HQ_10525	F:GO:0004519; C:GO:0005739; P:GO:0080156; P:GO:0090305	F:endonuclease activity; C:mitochondrion; P:mitochondrial mRNA modification; P:nucleic acid phosphodiester bond hydrolysis	.	.	.	209.518	-0.0892108	0.453497	-0.196717	0.844049	0.888053	209.518	0.742214	0.455755	1.62854	0.103411	0.158736	209.518	0.128609	0.453925	0.283327	0.776927	0.848399	204	252	117	249	300	258	64	217	187	177	323	201
Am_HQ_10532	F:GO:0004674; F:GO:0005524; P:GO:0006468; P:GO:0009069	F:protein serine/threonine kinase activity; F:ATP binding; P:protein phosphorylation; P:serine family amino acid metabolic process	.	.	.	262.026	0.418641	0.284783	1.47003	0.141552	0.209121	262.026	0.36163	0.284635	1.2705	0.203906	0.283409	262.026	0.00280483	0.283473	0.00989453	0.992105	1	266	264	191	161	268	302	224	250	275	243	343	390
Am_HQ_10533	F:GO:0003723	F:RNA binding	.	.	.	151.301	-0.45424	0.278487	-1.6311	0.102869	0.159759	151.301	-0.491856	0.278375	-1.76688	0.0772478	0.123073	151.301	-0.278388	0.279306	-0.996715	0.318903	0.435417	83	84	128	202	168	167	130	197	233	148	154	181
Am_HQ_1054	.	.	.	.	.	517.546	-0.745517	0.311693	-2.39183	0.0167647	0.0325786	517.546	-0.335799	0.312231	-1.07548	0.282159	0.372558	517.546	-0.44819	0.312033	-1.43635	0.150901	0.237171	369.17	401.18	178.66	614.08	723.43	798.71	557.67	517.82	497.11	618.38	587.34	536.82
Am_HQ_74616	.	.	.	.	.	1524.49	2.2596	2.7663	0.816832	0.414025	0.512154	1524.49	8.89229	2.78797	3.18952	0.00142507	0.00356438	1524.49	-0.256901	2.76611	-0.0928745	0.926003	0.956207	1.71	4417.51	2219.13	1613.43	0.31	2.09	14.51	0.4	0.02	1116.56	6972.85	1765.35
Am_HQ_10550	F:GO:0004672; F:GO:0005524; P:GO:0006468; C:GO:0016021	F:protein kinase activity; F:ATP binding; P:protein phosphorylation; C:integral component of membrane	.	.	.	121.842	-1.12936	0.679487	-1.66208	0.0964965	0.151351	121.842	1.06666	0.687568	1.55135	0.120817	0.181508	121.842	-0.476238	0.680732	-0.699596	0.48418	0.60136	108.28	64.61	56.01	326.23	119.77	236.7	42.86	54.32	52.4	249.54	33.25	156.1
Am_HQ_10551	F:GO:0035091	F:phosphatidylinositol binding	.	.	.	202.919	-0.329473	0.320844	-1.02689	0.30447	0.397788	202.919	-0.261748	0.321099	-0.815165	0.414978	0.510988	202.919	0.0357327	0.322037	0.110958	0.911649	0.94696	175.27	133.79	130.75	220.19	284.99	239.65	250.42	241.82	208.29	158.69	253.9	170.7
Am_HQ_89869	C:GO:0016020; F:GO:0045735	C:membrane; F:nutrient reservoir activity	.	.	.	17582.6	-11.1629	2.6664	-4.18652	2.8327e-05	9.96927e-05	17582.6	-12.9046	2.66639	-4.83973	1.30012e-06	6.03321e-06	17582.6	-12.2858	2.6664	-4.60763	4.07293e-06	2.27362e-05	3	9	0	4	24688	10259	2	63584	61123	1	72514	3413
Am_HQ_10563	.	.	K11093	SNRP70; U1 small nuclear ribonucleoprotein 70kDa	A 9120 Genetic Information Processing; B 09121 Transcription; C 03040 Spliceosome [PATH:ko03040]	401.23	-1.21202	0.370963	-3.26722	0.00108608	0.00278747	401.23	-0.310848	0.37215	-0.835275	0.403563	0.499268	401.23	-0.265849	0.372177	-0.714308	0.475037	0.592589	295.04	205.13	166.49	662.46	668.92	773.35	180.2	509.53	460.92	323.44	405.82	368.73
Am_HQ_10577	C:GO:0005634; F:GO:0043565; P:GO:0045944	C:nucleus; F:sequence-specific DNA binding; P:positive regulation of transcription by RNA polymerase II	K21596	CAMTA; calmodulin-binding transcription activator	None	416.977	0.403441	2.3754	0.169842	0.865135	0.903571	416.977	0.538255	2.37543	0.226592	0.820741	0.869093	416.977	0.532208	2.37542	0.224048	0.82272	0.881734	786.48	0	416.85	650.8	4.75	678.77	495.35	0	678.77	636.73	5.22	569.52
Am_HQ_10579	F:GO:0004842; P:GO:0016567; F:GO:0016874; C:GO:0019005; P:GO:0031146	F:ubiquitin-protein transferase activity; P:protein ubiquitination; F:ligase activity; C:SCF ubiquitin ligase complex; P:SCF-dependent proteasomal ubiquitin-dependent protein catabolic process	.	.	.	171.748	1.04431	0.906373	1.15219	0.249243	0.336764	171.748	1.22245	0.90676	1.34816	0.177608	0.252187	171.748	0.662046	0.905721	0.73096	0.464803	0.582632	43.89	174.49	454.3	37.19	135.12	273.09	42.91	89.1	263.73	92.6	143.29	330.77
Am_HQ_10580	F:GO:0003677; F:GO:0003700; C:GO:0005634; C:GO:0005667; P:GO:0006355; P:GO:0006355	F:DNA binding; F:DNA-binding transcription factor activity; C:nucleus; C:transcription regulator complex; P:regulation of transcription, DNA-templated; P:regulation of transcription, DNA-templated	K09284	AP2; AP2-like factor, euAP2 lineage	None	69.221	-2.15064	1.46232	-1.4707	0.141371	0.208923	69.221	-0.21598	1.46674	-0.147251	0.882934	0.915927	69.221	-1.04052	1.46408	-0.710698	0.477271	0.594551	17.78	0	58.38	151.87	7.54	324.77	69.65	9.06	34.06	118.14	9.51	88.13
Am_HQ_10586	F:GO:0004674; F:GO:0005524; P:GO:0006468; P:GO:0009069; C:GO:0016021	F:protein serine/threonine kinase activity; F:ATP binding; P:protein phosphorylation; P:serine family amino acid metabolic process; C:integral component of membrane	.	.	.	96.755	-1.07096	0.771675	-1.38783	0.165188	0.238023	96.755	0.153011	0.775529	0.197299	0.843594	0.88673	96.755	-0.635541	0.772635	-0.822563	0.410757	0.529945	58	89.01	25	50	275.58	149.4	82	68	47.01	186.97	126.16	37
Am_HQ_83740	C:GO:0005576; C:GO:0005618; P:GO:0009664; C:GO:0016020	C:extracellular region; C:cell wall; P:plant-type cell wall organization; C:membrane	K20628	exlX; expansin	None	1109.63	-9.90647	1.43894	-6.88454	5.79736e-12	5.2354e-11	1109.63	-14.1846	1.43797	-9.86434	5.94226e-23	2.3962e-21	1109.63	-3.24909	1.53703	-2.11387	0.0345263	0.0681886	0	0	0	106.19	408.37	186.31	5161.13	4156.67	4059.7	0	7	0
Am_HQ_48326	.	.	.	.	.	42.4214	1.92778	3.09517	0.622834	0.533393	0.628215	42.4214	2.1326	3.09574	0.688882	0.490897	0.585547	42.4214	9.40073	3.3085	2.84139	0.00449174	0.0116583	0	166.91	127.8	50.41	42.27	0	0	0.03	93.05	0	0	0
Am_HQ_10590	F:GO:0003844; F:GO:0004553; P:GO:0005978; P:GO:0005985; C:GO:0009501; C:GO:0009507; P:GO:0009793; P:GO:0019252; F:GO:0043169; F:GO:0102752	F:1,4-alpha-glucan branching enzyme activity; F:hydrolase activity, hydrolyzing O-glycosyl compounds; P:glycogen biosynthetic process; P:sucrose metabolic process; C:amyloplast; C:chloroplast; P:embryo development ending in seed dormancy; P:starch biosynthetic process; F:cation binding; F:1,4-alpha-glucan branching enzyme activity (using a glucosylated glycogenin as primer for glycogen synthesis)	K00700	GBE1, glgB; 1,4-alpha-glucan branching enzyme [EC:2.4.1.18]	A 9100 Metabolism; B 09101 Carbohydrate metabolism; C 00500 Starch and sucrose metabolism [PATH:ko00500]	116.106	-3.38884	1.932	-1.75405	0.0794213	0.127835	116.106	-1.74197	1.9334	-0.900986	0.367596	0.462461	116.106	-2.03712	1.93299	-1.05387	0.291943	0.405797	34.82	23.11	0	448.93	340.76	0	60.13	200.78	1.5	178.82	140.83	3.73
Am_HQ_10592	.	.	K15200	GTF3C2; general transcription factor 3C polypeptide 2	None	269.515	-0.683173	0.224995	-3.03639	0.00239432	0.00570946	269.515	-0.166428	0.226771	-0.733906	0.463006	0.558367	269.515	-0.188088	0.226574	-0.830138	0.406461	0.525907	148	176	217	337	332	501	251	240	313	236	256	338
Am_HQ_78541	F:GO:0016798	F:hydrolase activity, acting on glycosyl bonds	.	.	.	50.9505	6.90456	1.72802	3.99565	6.45177e-05	0.000212228	50.9505	8.85474	1.96869	4.49779	6.86631e-06	2.81297e-05	50.9505	1.6886	1.5816	1.06765	0.285676	0.39859	190.82	175.08	4.67	4.13	0	0	1	0	0	104.92	43.74	4.83
Am_HQ_88281	C:GO:0005634; P:GO:0009416	C:nucleus; P:response to light stimulus	.	.	.	157.844	8.19786	0.981173	8.35516	6.53425e-17	1.01686e-15	157.844	8.77223	1.14504	7.66109	1.84366e-14	2.77529e-13	157.844	-0.434142	0.514043	-0.844563	0.398355	0.517662	270	283	97	0	1	2	0	1	1	367	404	416
Am_HQ_79181	F:GO:0016491	F:oxidoreductase activity	K22374	DMAS1; 3''-deamino-3''-oxonicotianamine reductase [EC:1.1.1.285]	A 9100 Metabolism; B 09110 Biosynthesis of other secondary metabolites; C 00999 Biosynthesis of various plant secondary metabolites [PATH:ko00999]	671.365	-12.4884	1.20747	-10.3426	4.52059e-25	1.49769e-23	671.365	-10.2001	1.20827	-8.44193	3.12142e-17	6.61335e-16	671.365	-12.2676	1.2075	-10.1595	3.00556e-24	2.36359e-22	0	0	0	1627.52	1183.55	1404.34	232.45	262.92	376.03	1162.75	963.89	1550.15
Am_HQ_26073	P:GO:0042967; F:GO:0047172	P:obsolete acyl-carrier-protein biosynthetic process; F:shikimate O-hydroxycinnamoyltransferase activity	K13065	E2.3.1.133, HCT; shikimate O-hydroxycinnamoyltransferase [EC:2.3.1.133]	A 9100 Metabolism; B 09110 Biosynthesis of other secondary metabolites; C 00940 Phenylpropanoid biosynthesis [PATH:ko00940]|A 9100 Metabolism; B 09110 Biosynthesis of other secondary metabolites; C 00945 Stilbenoid, diarylheptanoid and gingerol biosynthesis [PATH:ko00945]|A 9100 Metabolism; B 09110 Biosynthesis of other secondary metabolites; C 00941 Flavonoid biosynthesis [PATH:ko00941]	215.012	12.2616	1.93646	6.33193	2.42111e-10	1.78399e-09	215.012	5.03954	1.54529	3.26122	0.00110933	0.00284088	215.012	9.39317	1.69552	5.53998	3.02512e-08	2.72409e-07	142.11	24.72	1856.09	0	0	0	29.03	10.11	42.87	4.15	0	0.16
Am_HQ_10611	C:GO:0000243; P:GO:0000395; C:GO:0005685; C:GO:0005829; F:GO:0030627; P:GO:0048510; C:GO:0071004	C:commitment complex; P:mRNA 5'-splice site recognition; C:U1 snRNP; C:cytosol; F:pre-mRNA 5'-splice site binding; P:regulation of timing of transition from vegetative to reproductive phase; C:U2-type prespliceosome	K13217	PRPF39, PRP39; pre-mRNA-processing factor 39	None	257.878	-0.931026	0.306781	-3.03483	0.00240673	0.00573659	257.878	0.0430596	0.309566	0.139097	0.889374	0.920821	257.878	-0.558391	0.30758	-1.81543	0.0694573	0.123706	77.64	199.8	203.35	362.26	328.98	519.38	179.49	225.02	201.43	310.2	302.67	318.3
Am_HQ_10618	P:GO:0002100; F:GO:0008270; F:GO:0052717; C:GO:0052718	P:tRNA wobble adenosine to inosine editing; F:zinc ion binding; F:tRNA-specific adenosine-34 deaminase activity; C:tRNA-specific adenosine-34 deaminase complex	K15441	TAD2, ADAT2; tRNA-specific adenosine deaminase 2 [EC:3.5.4.-]	None	137.393	-1.56049	0.973817	-1.60244	0.109058	0.167673	137.393	-1.59651	0.973788	-1.63948	0.101113	0.155663	137.393	-1.57464	0.973776	-1.61704	0.105869	0.177074	76.98	54.49	0	136.79	212.91	179.33	151.88	194.42	196.36	249.18	134.14	154.47
Am_HQ_10621	P:GO:0000160; C:GO:0005634	P:phosphorelay signal transduction system; C:nucleus	K12129	PRR7; pseudo-response regulator 7	A 9150 Organismal Systems; B 09159 Environmental adaptation; C 04712 Circadian rhythm - plant [PATH:ko04712]	634.155	-1.66418	0.530581	-3.13652	0.00170966	0.00420854	634.155	-0.0596232	0.531573	-0.112164	0.910694	0.936852	634.155	-0.204264	0.531406	-0.384385	0.700693	0.789593	556.76	238.01	134.61	1422.73	1214.99	1471.24	245.04	584.83	548.28	456.6	648.75	393.04
Am_HQ_42212	F:GO:0005524; C:GO:0009507; P:GO:0042026	F:ATP binding; C:chloroplast; P:protein refolding	K04077	groEL, HSPD1; chaperonin GroEL	A 9120 Genetic Information Processing; B 09123 Folding, sorting and degradation; C 03018 RNA degradation [PATH:ko03018]|A 9150 Organismal Systems; B 09149 Aging; C 04212 Longevity regulating pathway - worm [PATH:ko04212]|A 9160 Human Diseases; B 09171 Infectious disease: bacterial; C 05134 Legionellosis [PATH:ko05134]|A 9160 Human Diseases; B 09171 Infectious disease: bacterial; C 05152 Tuberculo…	59.196	10.3307	2.58131	4.00211	6.27793e-05	0.000207245	59.196	3.61629	2.30478	1.56904	0.116638	0.176105	59.196	9.38037	2.58131	3.63396	0.000279103	0.00099848	234.78	66.31	211.26	0	0	0	49.9	0	0	0.87	0	0
Am_HQ_40307	F:GO:0005506; P:GO:0008610; F:GO:0009924; C:GO:0016021; F:GO:0016491; F:GO:1990465	F:iron ion binding; P:lipid biosynthetic process; F:octadecanal decarbonylase activity; C:integral component of membrane; F:oxidoreductase activity; F:aldehyde oxygenase (deformylating) activity	K15404	K15404, CER1; aldehyde decarbonylase [EC:4.1.99.5]	A 9100 Metabolism; B 09103 Lipid metabolism; C 00073 Cutin, suberine and wax biosynthesis [PATH:ko00073]	1079.37	-9.80578	1.47594	-6.64377	3.05765e-11	2.50809e-10	1079.37	-14.148	1.47492	-9.59237	8.6083e-22	3.08809e-20	1079.37	-3.01982	1.58772	-1.90198	0.0571734	0.104743	0	0	0	43	423.8	188.82	2287.05	5089.81	6360.02	0	5	1
Am_HQ_10639	.	.	.	.	.	193.912	0.0684728	0.495071	0.138309	0.889996	0.922603	193.912	0.556702	0.496316	1.12167	0.262003	0.350575	193.912	0.36027	0.495702	0.726786	0.467357	0.585202	168.22	168.34	216.39	217.25	259.1	225.86	55.12	205.64	261.82	123.12	163.72	298.74
Am_HQ_1064	F:GO:0003676; F:GO:0003964; P:GO:0006278; F:GO:0008270	F:nucleic acid binding; F:RNA-directed DNA polymerase activity; P:RNA-templated DNA biosynthetic process; F:zinc ion binding	.	.	.	174.322	-0.64038	0.267904	-2.39033	0.0168331	0.0326928	174.322	-0.233971	0.269853	-0.867031	0.385925	0.481057	174.322	-0.59981	0.268009	-2.23802	0.0252198	0.0521432	121	104	96	190	219	269	111	191	212	173	242	246
Am_HQ_64197	P:GO:0042967; F:GO:0047172	P:obsolete acyl-carrier-protein biosynthetic process; F:shikimate O-hydroxycinnamoyltransferase activity	K13065	E2.3.1.133, HCT; shikimate O-hydroxycinnamoyltransferase [EC:2.3.1.133]	A 9100 Metabolism; B 09110 Biosynthesis of other secondary metabolites; C 00940 Phenylpropanoid biosynthesis [PATH:ko00940]|A 9100 Metabolism; B 09110 Biosynthesis of other secondary metabolites; C 00945 Stilbenoid, diarylheptanoid and gingerol biosynthesis [PATH:ko00945]|A 9100 Metabolism; B 09110 Biosynthesis of other secondary metabolites; C 00941 Flavonoid biosynthesis [PATH:ko00941]	1235.53	-11.9958	1.34141	-8.94271	3.79746e-19	7.34176e-18	1235.53	-14.1137	1.34121	-10.5231	6.76278e-26	3.62728e-24	1235.53	-1.43453	1.68391	-0.851903	0.394268	0.51348	0	0	0	1449.1	357.18	1216.53	2148.69	5148.1	6127.97	1.53	0	0
Am_HQ_10644	C:GO:0016021	C:integral component of membrane	.	.	.	205.04	1.26907	0.78675	1.61306	0.106733	0.164579	205.04	1.52002	0.787278	1.93072	0.0535174	0.0896813	205.04	1.25986	0.786706	1.60144	0.10928	0.181678	319.09	320.7	272.05	65.13	301.1	137.19	40.69	281.7	114.67	96.49	336.92	77.1
Am_HQ_67064	C:GO:0016021	C:integral component of membrane	.	.	.	237.261	7.34298	2.05528	3.57274	0.000353263	0.00100975	237.261	8.63677	2.09641	4.11978	3.79233e-05	0.000134688	237.261	4.43767	2.03067	2.18532	0.0288653	0.0585359	1258.9	470.9	360.56	0	0	19.83	0	0	8.39	0.32	78.39	59.24
Am_HQ_68785	F:GO:0005524; P:GO:0005975; F:GO:0008974; P:GO:0009409; C:GO:0009535; C:GO:0009570; C:GO:0009941; C:GO:0010319; P:GO:0015976; P:GO:0016310; P:GO:0042742; F:GO:0042803; C:GO:0048046; F:GO:0097718; C:GO:0099080	F:ATP binding; P:carbohydrate metabolic process; F:phosphoribulokinase activity; P:response to cold; C:chloroplast thylakoid membrane; C:chloroplast stroma; C:chloroplast envelope; C:stromule; P:carbon utilization; P:phosphorylation; P:defense response to bacterium; F:protein homodimerization activity; C:apoplast; F:disordered domain specific binding; C:supramolecular complex	K00855	PRK, prkB; phosphoribulokinase [EC:2.7.1.19]	A 9100 Metabolism; B 09102 Energy metabolism; C 00710 Carbon fixation in photosynthetic organisms [PATH:ko00710]	3042.49	-15.3984	1.20694	-12.7582	2.80466e-37	2.03873e-35	3042.49	-12.5451	1.20711	-10.3927	2.67769e-25	1.36026e-23	3042.49	-12.1514	1.20717	-10.066	7.80673e-24	5.90799e-22	0	0	0	12764	8098	10860	1057	1543	1846	1243	909	1229
Am_HQ_10655	P:GO:0006144; F:GO:0008728; C:GO:0009507; P:GO:0015969; F:GO:0016301; P:GO:0016310; F:GO:0016798	P:purine nucleobase metabolic process; F:GTP diphosphokinase activity; C:chloroplast; P:guanosine tetraphosphate metabolic process; F:kinase activity; P:phosphorylation; F:hydrolase activity, acting on glycosyl bonds	K00951	relA; GTP pyrophosphokinase [EC:2.7.6.5]	A 9100 Metabolism; B 09104 Nucleotide metabolism; C 00230 Purine metabolism [PATH:ko00230]	2047.18	-1.8336	0.343719	-5.33458	9.57661e-08	4.95027e-07	2047.18	-0.215639	0.344156	-0.626574	0.530939	0.624208	2047.18	0.360454	0.344452	1.04646	0.29535	0.409708	707	842	1526	4508	3264	7106	1048	1774	1997	1137	1063	1009
Am_HQ_10656	.	.	.	.	.	157.737	-5.46284	2.31695	-2.35777	0.0183851	0.0353496	157.737	-2.6156	2.319	-1.1279	0.259362	0.347483	157.737	-3.8537	2.31761	-1.66279	0.0963551	0.163362	0	26	0	273.73	1023.81	14.09	87	92.71	0	152.59	294.49	0
Am_HQ_45749	P:GO:0006633; C:GO:0016021; F:GO:0016747	P:fatty acid biosynthetic process; C:integral component of membrane; F:acyltransferase activity, transferring groups other than amino-acyl groups	K15397	KCS; 3-ketoacyl-CoA synthase [EC:2.3.1.199]	A 9100 Metabolism; B 09103 Lipid metabolism; C 00062 Fatty acid elongation [PATH:ko00062]|A 9150 Organismal Systems; B 09159 Environmental adaptation; C 04626 Plant-pathogen interaction [PATH:ko04626]	2059.31	-13.8704	1.24574	-11.1342	8.5462e-29	3.66707e-27	2059.31	-14.04	1.24573	-11.2705	1.83574e-29	1.38451e-27	2059.31	-12.1474	1.24591	-9.74976	1.84905e-22	1.24574e-20	0	0	0	3919.86	3762.63	3250.55	2116.03	4386.1	6269.94	1550.36	955.08	845
Am_HQ_10667	F:GO:0003677; C:GO:0005634; F:GO:0046872	F:DNA binding; C:nucleus; F:metal ion binding	.	.	.	170.811	0.164669	0.332367	0.495443	0.620288	0.705679	170.811	0.0548587	0.331955	0.165259	0.86874	0.905811	170.811	-0.273542	0.330629	-0.82734	0.408045	0.527401	76.5	202.45	142.92	163.52	138.07	188.26	193.91	166.16	155.2	242.34	179.74	244.64
Am_HQ_79239	F:GO:0016787	F:hydrolase activity	.	.	.	15345.6	-14.3386	1.091	-13.1427	1.8748e-39	1.63752e-37	15345.6	-10.411	1.09108	-9.54188	1.40263e-21	4.95925e-20	15345.6	-12.0867	1.09102	-11.0783	1.59823e-28	1.91944e-26	0	6	0	59944.7	48912.4	46117.1	1104.99	3775.98	5872.96	4293.95	25377.7	3046.96
Am_HQ_67032	C:GO:0005634; P:GO:0006355	C:nucleus; P:regulation of transcription, DNA-templated	.	.	.	31.7649	9.25177	2.4725	3.74187	0.000182657	0.000552471	31.7649	2.13379	2.18019	0.978719	0.327719	0.421361	31.7649	9.26325	2.4725	3.74651	0.00017931	0.000675946	178.18	49.85	7.89	0	0	0	0	20.29	63.26	0	0	0.02
Am_HQ_79317	.	.	.	.	.	255.762	-5.60301	1.72743	-3.24355	0.00118049	0.00300432	255.762	-9.54905	1.71159	-5.57905	2.41838e-08	1.49445e-07	255.762	-11.8602	1.71069	-6.93295	4.12158e-12	7.11551e-11	0	0	0	3.27	20.33	13	223.5	163.28	147.49	16.24	2210.56	516.99
Am_HQ_77328	F:GO:0003950	F:NAD+ ADP-ribosyltransferase activity	.	.	.	1940.15	11.5037	0.84875	13.5537	7.53312e-42	7.49618e-40	1940.15	9.85674	0.74674	13.1997	8.8087e-40	1.53271e-37	1940.15	9.18175	0.726475	12.6388	1.2905e-36	2.79583e-34	8445	8246	2002	0	2	7	3	10	15	9	13	22
Am_HQ_1069	C:GO:0016020; F:GO:0016740	C:membrane; F:transferase activity	.	.	.	404.16	-0.718687	0.331645	-2.16704	0.030232	0.0548979	404.16	-0.22286	0.332423	-0.670411	0.502596	0.597148	404.16	-0.298089	0.33224	-0.897209	0.369607	0.488609	305.74	253.67	212.4	518.01	636.94	554.12	223.14	510.84	506.56	373.36	539.12	377.34
Am_HQ_83689	F:GO:0015267; C:GO:0016021; P:GO:0055085	F:channel activity; C:integral component of membrane; P:transmembrane transport	K09874	NIP; aquaporin NIP	None	858.771	-6.50376	1.98207	-3.28129	0.00103332	0.00266445	858.771	-13.8793	1.97423	-7.03025	2.0616e-12	2.35926e-11	858.771	-0.533664	2.2989	-0.232139	0.81643	0.877717	0	0	0	1	62	1	7577	1326	1116	0	0	1
Am_HQ_10693	C:GO:0005886; P:GO:0006820; F:GO:0008381; C:GO:0016021; P:GO:0055085	C:plasma membrane; P:anion transport; F:mechanosensitive ion channel activity; C:integral component of membrane; P:transmembrane transport	K22048	MSL4S; mechanosensitive ion channel protein 4/5/6/7/8/9/10	None	1035.34	0.224634	0.582663	0.385529	0.699846	0.773105	1035.34	0.440539	0.582753	0.755962	0.449672	0.545262	1035.34	0.4781	0.582756	0.820413	0.411981	0.530937	225	1063	1849	1176	871	1468	692	1202	1130	592	1292	1065
Am_HQ_10694	C:GO:0005829; C:GO:0005886; P:GO:0006508; F:GO:0008270; F:GO:0010013; F:GO:0042277; P:GO:0043171; F:GO:0070006	C:cytosol; C:plasma membrane; P:proteolysis; F:zinc ion binding; F:N-1-naphthylphthalamic acid binding; F:peptide binding; P:peptide catabolic process; F:metalloaminopeptidase activity	K08776	NPEPPS; puromycin-sensitive aminopeptidase [EC:3.4.11.14]	None	223.858	0.219228	0.342892	0.639349	0.522596	0.618252	223.858	0.196157	0.342861	0.572117	0.567243	0.658036	223.858	-0.579394	0.340668	-1.70076	0.0889882	0.15264	172.89	183.16	158.71	271.91	124.85	191.44	191.34	203.03	201.26	239.61	385.94	414.82
Am_HQ_64617	F:GO:0001228; C:GO:0005634; P:GO:0045944; F:GO:0046983	F:DNA-binding transcription activator activity, RNA polymerase II-specific; C:nucleus; P:positive regulation of transcription by RNA polymerase II; F:protein dimerization activity	.	.	.	48.7812	6.2751	1.15458	5.43497	5.48054e-08	2.94025e-07	48.7812	8.52756	1.52226	5.6019	2.12015e-08	1.32161e-07	48.7812	0.811138	0.968906	0.837169	0.402498	0.522064	176	29	77	4	1	0	1	0	0	50	61	121
Am_HQ_10698	F:GO:0003677; F:GO:0003743; C:GO:0005669; C:GO:0005840; P:GO:0006352; P:GO:0006446; F:GO:0008134; P:GO:0045944	F:DNA binding; F:translation initiation factor activity; C:transcription factor TFIID complex; C:ribosome; P:DNA-templated transcription, initiation; P:regulation of translational initiation; F:transcription factor binding; P:positive regulation of transcription by RNA polymerase II	K03129	TAF4; transcription initiation factor TFIID subunit 4	A 9120 Genetic Information Processing; B 09121 Transcription; C 03022 Basal transcription factors [PATH:ko03022]|A 9160 Human Diseases; B 09164 Neurodegenerative disease; C 05016 Huntington disease [PATH:ko05016]	327.495	-0.918426	0.356947	-2.573	0.0100821	0.0207636	327.495	-0.443795	0.357745	-1.24053	0.214778	0.29595	327.495	-0.261442	0.358054	-0.730175	0.465283	0.583069	111.48	296.92	194.96	533.86	439.27	500.57	356.88	273.75	422.17	205.28	347.64	396.5
Am_HQ_69865	.	.	.	.	.	176.758	12.0216	1.5328	7.8429	4.40256e-15	5.73631e-14	176.758	12.0103	1.5328	7.83556	4.66768e-15	7.63482e-14	176.758	9.17372	1.21723	7.53657	4.82499e-14	1.14279e-12	980	418	248	0	0	0	0	0	0	0	3	1
Am_HQ_58861	P:GO:0006633; C:GO:0016021; F:GO:0016747	P:fatty acid biosynthetic process; C:integral component of membrane; F:acyltransferase activity, transferring groups other than amino-acyl groups	K15397	KCS; 3-ketoacyl-CoA synthase [EC:2.3.1.199]	A 9100 Metabolism; B 09103 Lipid metabolism; C 00062 Fatty acid elongation [PATH:ko00062]|A 9150 Organismal Systems; B 09159 Environmental adaptation; C 04626 Plant-pathogen interaction [PATH:ko04626]	486.161	-12.1165	1.59249	-7.60857	2.77151e-14	3.27864e-13	486.161	-8.93774	1.59412	-5.6067	2.06222e-08	1.28804e-07	486.161	-11.8343	1.59253	-7.43116	1.07652e-13	2.40536e-12	0	0	0	1927.92	1102.65	67.84	145.56	132.33	69.51	1421.93	1055.75	192.24
Am_HQ_42352	P:GO:0005982; P:GO:0005985; C:GO:0016021; F:GO:0030599; P:GO:0042545; P:GO:0043086; F:GO:0045330; P:GO:0045490; F:GO:0046910	P:starch metabolic process; P:sucrose metabolic process; C:integral component of membrane; F:pectinesterase activity; P:cell wall modification; P:negative regulation of catalytic activity; F:aspartyl esterase activity; P:pectin catabolic process; F:pectinesterase inhibitor activity	.	.	.	823.233	-5.8999	4.21338	-1.40028	0.16143	0.233584	823.233	-13.821	4.20777	-3.28463	0.00102116	0.00263895	823.233	0	4.36951	0	1	1	0	0	0	0	42	0	7225	1402	1002	0	0	0
Am_HQ_10700	.	.	.	.	.	200.646	0.695225	0.467355	1.48757	0.136863	0.203349	200.646	0.0826004	0.465735	0.177355	0.85923	0.898252	200.646	0.186055	0.465901	0.399345	0.689639	0.7814	131	209.9	234	100	225.07	141.17	139	267.88	324.41	143.34	347.8	179.02
Am_HQ_10701	F:GO:0004674; F:GO:0005524; P:GO:0006468; P:GO:0009069; C:GO:0016021	F:protein serine/threonine kinase activity; F:ATP binding; P:protein phosphorylation; P:serine family amino acid metabolic process; C:integral component of membrane	K08857	NEK1_4_5; NIMA (never in mitosis gene a)-related kinase 1/4/5 [EC:2.7.11.1]	None	425.111	0.712562	0.41566	1.71429	0.0864752	0.137576	425.111	0.556372	0.415458	1.33918	0.180513	0.25572	425.111	0.733953	0.415669	1.76572	0.0774435	0.135531	758.01	304.25	313.28	406.32	312.59	452.61	417.98	420.1	448.49	337.63	421.39	400.29
Am_HQ_10707	C:GO:0005730; C:GO:0030692; C:GO:0032040	C:nucleolus; C:Noc4p-Nop14p complex; C:small-subunit processome	K14766	NOP14, UTP2; nucleolar protein 14	None	444.637	0.456091	0.448876	1.01607	0.309594	0.403123	444.637	0.861244	0.449447	1.91623	0.055336	0.0922183	444.637	0.339979	0.448728	0.757649	0.448661	0.567224	765	344	248	404	455	520	243	373	432	376	499	632
Am_HQ_10708	F:GO:0003746; C:GO:0005840; P:GO:0006139; P:GO:0006448; F:GO:0008270; P:GO:0032968	F:translation elongation factor activity; C:ribosome; P:nucleobase-containing compound metabolic process; P:regulation of translational elongation; F:zinc ion binding; P:positive regulation of transcription elongation from RNA polymerase II promoter	K11292	SUPT6H, SPT6; transcription elongation factor SPT6	None	271.815	-0.729028	0.849492	-0.858192	0.390786	0.488604	271.815	-0.407573	0.849896	-0.479556	0.631543	0.715537	271.815	-1.74605	0.848705	-2.05731	0.0396569	0.0766163	19	335	39	236	288	274	75	256	334	295	538	811
Am_HQ_10709	C:GO:0000145; P:GO:0006893; P:GO:0006904	C:exocyst; P:Golgi to plasma membrane transport; P:vesicle docking involved in exocytosis	K19985	EXOC6, SEC15; exocyst complex component 6	None	453.105	0.793967	0.541445	1.46638	0.142544	0.210416	453.105	0.639499	0.541297	1.18142	0.237436	0.322091	453.105	0.720659	0.54135	1.33123	0.183114	0.27784	279.75	481.2	821.01	229.08	385.23	619.65	187.08	492.47	709.39	244.06	432.83	609.46
Am_HQ_10712	F:GO:0003723; F:GO:0046872	F:RNA binding; F:metal ion binding	.	.	.	697.796	0.113925	0.460074	0.247623	0.804426	0.858008	697.796	0.767762	0.46063	1.66677	0.095561	0.14818	697.796	0.0370832	0.460016	0.0806128	0.93575	0.962852	406.7	900	689.84	572.84	1186.73	615.94	267.28	802.39	483.89	600.84	1108	849.28
Am_HQ_10718	F:GO:0003723; C:GO:0005634; F:GO:0008270; C:GO:1990904	F:RNA binding; C:nucleus; F:zinc ion binding; C:ribonucleoprotein complex	.	.	.	121.297	-0.0523855	0.707167	-0.074078	0.940948	0.959444	121.297	-0.190577	0.706869	-0.269607	0.787463	0.843538	121.297	0.222704	0.707886	0.314604	0.753062	0.830688	133.27	135.2	23.08	167.76	151.84	74.88	138.85	178.89	121.58	130.5	156.66	47.22
Am_HQ_42156	F:GO:0005506; P:GO:0008610; F:GO:0009924; C:GO:0016021; F:GO:0016491; F:GO:1990465	F:iron ion binding; P:lipid biosynthetic process; F:octadecanal decarbonylase activity; C:integral component of membrane; F:oxidoreductase activity; F:aldehyde oxygenase (deformylating) activity	K15404	K15404, CER1; aldehyde decarbonylase [EC:4.1.99.5]	A 9100 Metabolism; B 09103 Lipid metabolism; C 00073 Cutin, suberine and wax biosynthesis [PATH:ko00073]	901.418	-10.8402	1.22771	-8.82967	1.04987e-18	1.94958e-17	901.418	-13.7815	1.22716	-11.2304	2.89114e-29	2.13954e-27	901.418	0	1.70097	0	1	1	0	0	0	271	548.38	544	3198	3413.12	3683.52	0	0	0
Am_HQ_10729	F:GO:0004806; P:GO:0016042; P:GO:0046486	F:triglyceride lipase activity; P:lipid catabolic process; P:glycerolipid metabolic process	.	.	.	387.243	0.206429	0.414449	0.49808	0.618428	0.703999	387.243	0.621309	0.415121	1.49669	0.134473	0.199009	387.243	0.241774	0.414476	0.583324	0.559675	0.670376	479.39	425.72	204.66	266.96	527.33	514.82	193.33	388.41	409.78	329.81	463.89	486.27
Am_HQ_14879	.	.	.	.	.	757.788	-4.67694	3.95708	-1.18192	0.237239	0.323213	757.788	-13.7047	3.94309	-3.47562	0.000509668	0.0014126	757.788	0	4.11524	0	1	1	0	0	0	0	18	0	6594	1364	940	0	0	0
Am_HQ_10732	C:GO:0000932; C:GO:0005634; P:GO:0006355; P:GO:0017148; C:GO:0030015	C:P-body; C:nucleus; P:regulation of transcription, DNA-templated; P:negative regulation of translation; C:CCR4-NOT core complex	K12580	CNOT3, NOT3; CCR4-NOT transcription complex subunit 3	A 9120 Genetic Information Processing; B 09123 Folding, sorting and degradation; C 03018 RNA degradation [PATH:ko03018]	1083.56	0.0790194	0.435989	0.181242	0.856178	0.896801	1083.56	0.53779	0.436228	1.23282	0.217644	0.299209	1083.56	0.335151	0.436101	0.768517	0.44218	0.560828	684.09	1063.16	1366.27	970.15	1057.06	1953.94	476.06	917.86	1528.34	712.22	945.79	1656.73
Am_HQ_9522	F:GO:0004601; F:GO:0005509; P:GO:0006804; P:GO:0006979; C:GO:0016021; F:GO:0050664; P:GO:0098869	F:peroxidase activity; F:calcium ion binding; P:obsolete peroxidase reaction; P:response to oxidative stress; C:integral component of membrane; F:oxidoreductase activity, acting on NAD(P)H, oxygen as acceptor; P:cellular oxidant detoxification	K13447	RBOH; respiratory burst oxidase [EC:1.6.3.- 1.11.1.-]	A 9130 Environmental Information Processing; B 09132 Signal transduction; C 04016 MAPK signaling pathway - plant [PATH:ko04016]|A 9150 Organismal Systems; B 09159 Environmental adaptation; C 04626 Plant-pathogen interaction [PATH:ko04626]	273.626	-9.90348	1.26217	-7.84636	4.28272e-15	5.58676e-14	273.626	-8.09808	1.26513	-6.40096	1.54398e-10	1.33329e-09	273.626	-11.8135	1.26131	-9.36605	7.52969e-21	4.2018e-19	0	0	0	266.37	208.11	227.95	47.01	54.71	102.71	704.98	1381.19	569.59
Am_HQ_1076	C:GO:0000139; F:GO:0005198; P:GO:0006886; P:GO:0006888; P:GO:0006891; C:GO:0030126	C:Golgi membrane; F:structural molecule activity; P:intracellular protein transport; P:endoplasmic reticulum to Golgi vesicle-mediated transport; P:intra-Golgi vesicle-mediated transport; C:COPI vesicle coat	K17301	COPB1, SEC26; coatomer subunit beta	None	269.387	-0.0703533	0.281166	-0.25022	0.802417	0.856406	269.387	-0.390255	0.28025	-1.39252	0.163764	0.235342	269.387	-0.478284	0.279946	-1.70849	0.0875458	0.150516	127.48	264.04	173.26	212.11	320.25	238.22	289.43	368.96	299.83	298.04	372.03	366.22
Am_HQ_10760	F:GO:0003677; C:GO:0005634; F:GO:0008270	F:DNA binding; C:nucleus; F:zinc ion binding	.	.	.	421.525	-0.470109	0.325579	-1.44392	0.148762	0.218225	421.525	-0.350913	0.325787	-1.07712	0.281425	0.371879	421.525	-0.498893	0.325514	-1.53263	0.125367	0.203704	284.82	380.07	149.64	522.6	450.92	520.66	497.27	440.35	412.16	547.7	495.14	493.64
Am_HQ_88431	F:GO:0003735; C:GO:0005840; P:GO:0006412; P:GO:0042254	F:structural constituent of ribosome; C:ribosome; P:translation; P:ribosome biogenesis	K02866	RP-L10e, RPL10; large subunit ribosomal protein L10e	A 9120 Genetic Information Processing; B 09122 Translation; C 03010 Ribosome [PATH:ko03010]|A 9160 Human Diseases; B 09172 Infectious disease: viral; C 05171 Coronavirus disease - COVID-19 [PATH:ko05171]	2998.99	6.3987	0.665069	9.6211	6.5129e-22	1.64859e-20	2998.99	3.90723	0.662054	5.90168	3.59821e-09	2.53469e-08	2998.99	9.07161	0.684269	13.2574	4.08976e-40	1.10214e-37	9601	1665	14861	176	84	170	541	697	1213	22	15	31
Am_HQ_10771	F:GO:0003876; C:GO:0005829; P:GO:0006144; C:GO:0016021; P:GO:0032264; P:GO:0046033	F:AMP deaminase activity; C:cytosol; P:purine nucleobase metabolic process; C:integral component of membrane; P:IMP salvage; P:AMP metabolic process	K01490	AMPD; AMP deaminase [EC:3.5.4.6]	A 9100 Metabolism; B 09104 Nucleotide metabolism; C 00230 Purine metabolism [PATH:ko00230]	509.948	1.05227	0.369927	2.84453	0.00444768	0.00998221	509.948	0.618498	0.369206	1.67521	0.0938924	0.145828	509.948	-0.144192	0.368299	-0.391506	0.695423	0.785858	652.29	423.89	425.92	418.35	297.42	258	364.55	513.74	451.85	499.91	805.38	988.38
Am_HQ_25790	P:GO:0006855; F:GO:0015297; C:GO:0016021; F:GO:0042910	P:xenobiotic transmembrane transport; F:antiporter activity; C:integral component of membrane; F:xenobiotic transmembrane transporter activity	K03327	TC.MATE, SLC47A, norM, mdtK, dinF; multidrug resistance protein, MATE family	None	1053.66	11.511	1.34324	8.56956	1.03882e-17	1.74835e-16	1053.66	8.65313	1.19197	7.25952	3.88462e-13	4.89409e-12	1053.66	9.02504	1.19895	7.52744	5.17462e-14	1.21907e-12	1163.6	1228.87	7843.42	0	0	4.7	13.01	10.67	8.98	0	5.64	21.45
Am_HQ_66424	F:GO:0016491	F:oxidoreductase activity	.	.	.	275.596	8.36296	1.35451	6.17415	6.65213e-10	4.62842e-09	275.596	8.33852	1.35367	6.15993	7.27767e-10	5.74159e-09	275.596	1.06437	1.24591	0.854291	0.392944	0.512175	967.42	459.02	315.64	7.21	0	0	0	0	7.71	197.41	480.61	491.82
Am_HQ_10777	.	.	.	.	.	208.294	0.418996	0.959791	0.436549	0.662438	0.741794	208.294	0.843639	0.960358	0.878463	0.379693	0.4746	208.294	0.593402	0.959977	0.618142	0.536482	0.649272	404.94	128.41	116.4	443.23	88.02	131.62	298.06	75.22	99.12	438.97	90.69	71.27
Am_HQ_10779	F:GO:0004427; P:GO:0006119; F:GO:0009678; C:GO:0016021; P:GO:1902600; P:GO:1902600	F:inorganic diphosphatase activity; P:oxidative phosphorylation; F:pyrophosphate hydrolysis-driven proton transmembrane transporter activity; C:integral component of membrane; P:proton transmembrane transport; P:proton transmembrane transport	K23025	AVP; H+-translocating diphosphatase [EC:7.1.3.1]	None	1277.13	0.826322	0.268436	3.07828	0.00208198	0.00502651	1277.13	0.376807	0.268083	1.40556	0.159855	0.230541	1277.13	0.0989603	0.26789	0.369407	0.711825	0.798513	979.7	1785.77	1112.97	693.87	1106.36	1081.23	1043.62	1382.57	1497.31	1212.97	1473.16	2126.4
Am_HQ_10781	C:GO:0000228; C:GO:0000445; F:GO:0003729; P:GO:0006406; P:GO:0032786	C:nuclear chromosome; C:THO complex part of transcription export complex; F:mRNA binding; P:mRNA export from nucleus; P:positive regulation of DNA-templated transcription, elongation	K13174	THOC5; THO complex subunit 5	A 9120 Genetic Information Processing; B 09122 Translation; C 03013 Nucleocytoplasmic transport [PATH:ko03013]	633.576	-0.0234371	0.281694	-0.0832007	0.933692	0.954512	633.576	0.297897	0.282119	1.05593	0.291002	0.382225	633.576	0.260908	0.282027	0.925119	0.354904	0.473277	739.86	436.49	467.91	700.99	705.24	891.97	565.68	581.92	667.71	603.78	554.33	738.19
Am_HQ_87856	P:GO:0009416; C:GO:0009522; C:GO:0009523; C:GO:0009535; P:GO:0009768; C:GO:0009941; C:GO:0010287; C:GO:0016021; F:GO:0016168; P:GO:0018298	P:response to light stimulus; C:photosystem I; C:photosystem II; C:chloroplast thylakoid membrane; P:photosynthesis, light harvesting in photosystem I; C:chloroplast envelope; C:plastoglobule; C:integral component of membrane; F:chlorophyll binding; P:protein-chromophore linkage	K08912	LHCB1; light-harvesting complex II chlorophyll a/b binding protein 1	A 9100 Metabolism; B 09102 Energy metabolism; C 00196 Photosynthesis - antenna proteins [PATH:ko00196]	588.211	-10.6384	1.42643	-7.4581	8.77791e-14	9.79667e-13	588.211	-12.3901	1.42599	-8.68878	3.66337e-18	8.77065e-17	588.211	-11.7411	1.42609	-8.23308	1.8246e-16	6.00895e-15	0	0	0	39	621	538	1132	1229	1593	1206	530	800
Am_HQ_33095	.	.	.	.	.	45.4291	4.98155	1.00462	4.95863	7.09918e-07	3.25743e-06	45.4291	4.06541	0.976046	4.16518	3.1111e-05	0.000112629	45.4291	8.98637	1.50832	5.95786	2.55567e-09	2.76779e-08	35.87	108.19	269.43	1.14	3.75	13.44	4.87	15.42	12.59	1.17	0	0
Am_HQ_29109	P:GO:0009117; C:GO:0016020; P:GO:0046373; F:GO:0046556	P:nucleotide metabolic process; C:membrane; P:L-arabinose metabolic process; F:alpha-L-arabinofuranosidase activity	K01209	abfA; alpha-L-arabinofuranosidase [EC:3.2.1.55]	A 9100 Metabolism; B 09101 Carbohydrate metabolism; C 00520 Amino sugar and nucleotide sugar metabolism [PATH:ko00520]	723.439	-4.59441	3.93384	-1.16792	0.242839	0.329416	723.439	-13.6378	3.91894	-3.47998	0.00050146	0.00139338	723.439	0	4.0921	0	1	1	0	0	0	0	17	0	6279.27	1266.15	957	0	0	0
Am_HQ_10789	F:GO:0016740	F:transferase activity	.	.	.	70.788	-4.24003	1.02805	-4.12433	3.71811e-05	0.000128279	70.788	1.38727	1.08547	1.27804	0.201237	0.280211	70.788	1.22678	1.07849	1.1375	0.25533	0.364489	6.32	24.6	4.04	81.99	514.77	237.75	9.7	2.99	3.41	14.3	1.02	4
Am_HQ_10791	F:GO:0016787; F:GO:0043531	F:hydrolase activity; F:ADP binding	.	.	.	415.742	2.44184	0.952813	2.56277	0.010384	0.0212822	415.742	1.65464	0.951527	1.73893	0.082047	0.12957	415.742	-0.395366	0.950138	-0.416114	0.677327	0.771325	141.45	279.91	1033.07	200.3	73.83	69.52	126.72	256.69	234.01	2074.39	249.82	176.82
Am_HQ_60825	P:GO:0002100; F:GO:0004131; P:GO:0006206; F:GO:0052717; C:GO:0052718; F:GO:0102480	P:tRNA wobble adenosine to inosine editing; F:cytosine deaminase activity; P:pyrimidine nucleobase metabolic process; F:tRNA-specific adenosine-34 deaminase activity; C:tRNA-specific adenosine-34 deaminase complex; F:5-fluorocytosine deaminase activity	K15442	TAD3, ADAT3; tRNA-specific adenosine deaminase 3	None	60.8672	0.929307	3.30873	0.280865	0.778814	0.837255	60.8672	5.07854	3.32867	1.5257	0.127086	0.189522	60.8672	8.97813	3.51104	2.55712	0.0105544	0.0246419	300.79	49.36	0	0	0	297.55	13.27	0	0	0.68	0	0.01
Am_HQ_48439	F:GO:0000149; F:GO:0005545; F:GO:0005546; C:GO:0005905; P:GO:0006900; C:GO:0016021; C:GO:0030136; F:GO:0032050; P:GO:0048268; P:GO:0072583	F:SNARE binding; F:1-phosphatidylinositol binding; F:phosphatidylinositol-4,5-bisphosphate binding; C:clathrin-coated pit; P:vesicle budding from membrane; C:integral component of membrane; C:clathrin-coated vesicle; F:clathrin heavy chain binding; P:clathrin coat assembly; P:clathrin-dependent endocytosis	K20043	SNAP91, AP180, CALM; clathrin coat assembly protein AP180	None	40.1975	9.87815	2.3375	4.22595	2.37932e-05	8.51192e-05	40.1975	7.8719	2.24151	3.51187	0.000444966	0.00125227	40.1975	8.92783	2.3375	3.8194	0.000133776	0.000518446	298.95	3.88	51.18	0	0	0	2.47	0	0	0	0	0.87
Am_HQ_38265	C:GO:0016020	C:membrane	K01537	ATP2C; P-type Ca2+ transporter type 2C [EC:7.2.2.10]	None	767.499	-12.5668	1.20118	-10.4621	1.28994e-25	4.43315e-24	767.499	-12.1956	1.20124	-10.1525	3.22993e-24	1.5058e-22	767.499	-11.4476	1.2014	-9.52851	1.59558e-21	9.55531e-20	0	0	0	1352.07	1190.8	1987.23	1108.92	991.9	1327.3	639.83	597.32	843.54
Am_HQ_10814	F:GO:0004497; F:GO:0005506; C:GO:0016021; P:GO:0016125; F:GO:0016705; F:GO:0020037	F:monooxygenase activity; F:iron ion binding; C:integral component of membrane; P:sterol metabolic process; F:oxidoreductase activity, acting on paired donors, with incorporation or reduction of molecular oxygen; F:heme binding	.	.	.	144.308	1.34849	1.37785	0.978694	0.327731	0.422483	144.308	1.47424	1.37806	1.06979	0.284713	0.375376	144.308	1.96866	1.37893	1.42768	0.153384	0.24024	379.02	10.53	267.21	214.95	4.56	147.94	174.86	12.21	133.6	137.61	7.16	95.68
Am_HQ_10816	.	.	K14509	ETR, ERS; ethylene receptor [EC:2.7.13.-]	A 9130 Environmental Information Processing; B 09132 Signal transduction; C 04016 MAPK signaling pathway - plant [PATH:ko04016]|A 9130 Environmental Information Processing; B 09132 Signal transduction; C 04075 Plant hormone signal transduction [PATH:ko04075]	318.919	-1.48682	2.02834	-0.733021	0.463546	0.561253	318.919	-1.61634	2.02831	-0.796893	0.425513	0.521577	318.919	-1.61363	2.0283	-0.795559	0.426288	0.545588	0	198.77	135.2	0	413	824.22	7	462	908.38	3	472.49	836.82
Am_HQ_61992	P:GO:0005982; P:GO:0005985; F:GO:0030599; P:GO:0042545; F:GO:0045330; P:GO:0045490	P:starch metabolic process; P:sucrose metabolic process; F:pectinesterase activity; P:cell wall modification; F:aspartyl esterase activity; P:pectin catabolic process	K01051	E3.1.1.11; pectinesterase [EC:3.1.1.11]	A 9100 Metabolism; B 09101 Carbohydrate metabolism; C 00040 Pentose and glucuronate interconversions [PATH:ko00040]|A 9130 Environmental Information Processing; B 09132 Signal transduction; C 02020 Two-component system [PATH:ko02020]	712.27	-4.4137	3.93435	-1.12184	0.261931	0.351095	712.27	-13.6156	3.91744	-3.47564	0.000509627	0.0014126	712.27	0	4.09067	0	1	1	0	0	0	0	15	0	6415	1085	819	0	0	0
Am_HQ_33147	F:GO:0003676; P:GO:0015074	F:nucleic acid binding; P:DNA integration	.	.	.	161.803	-5.19881	1.66961	-3.11378	0.00184708	0.00450816	161.803	-5.17438	1.67024	-3.09799	0.00194838	0.0047158	161.803	-11.4427	1.64666	-6.94902	3.67823e-12	6.40614e-11	0	0	0	5	20	1	8.17	16	2	398	1451.01	193
Am_HQ_1082	F:GO:0003950	F:NAD+ ADP-ribosyltransferase activity	.	.	.	329.958	-0.644077	0.276449	-2.32982	0.0198157	0.0377977	329.958	-0.105863	0.277753	-0.381139	0.7031	0.776126	329.958	-0.418824	0.276888	-1.51261	0.130379	0.210423	217.87	275.34	155.52	487.69	475.61	367.51	227.61	342.54	362.7	367.13	439.95	352.96
Am_HQ_10825	C:GO:0005794; P:GO:0006623; P:GO:0006896; P:GO:0006903; P:GO:0007032; C:GO:0010008; C:GO:0030123; P:GO:0080171; P:GO:1990019	C:Golgi apparatus; P:protein targeting to vacuole; P:Golgi to vacuole transport; P:vesicle targeting; P:endosome organization; C:endosome membrane; C:AP-3 adaptor complex; P:lytic vacuole organization; P:protein storage vacuole organization	K12396	AP3D; AP-3 complex subunit delta	A 9140 Cellular Processes; B 09141 Transport and catabolism; C 04142 Lysosome [PATH:ko04142]	125.071	1.07931	1.46505	0.736701	0.461304	0.559029	125.071	1.44052	1.46572	0.982807	0.325703	0.419271	125.071	0.741885	1.46456	0.506557	0.612465	0.716516	247.49	243.21	5.47	153.76	142.17	3.32	87.79	141.83	5.71	166.56	218.15	9.75
Am_HQ_1083	F:GO:0003677; P:GO:0007165; F:GO:0043531	F:DNA binding; P:signal transduction; F:ADP binding	.	.	.	190.059	1.01797	0.799103	1.27389	0.202701	0.283338	190.059	1.56206	0.800396	1.9516	0.0509855	0.0859469	190.059	0.463997	0.798211	0.581296	0.561041	0.671608	69.79	479.74	216.03	94.48	201.22	186.11	18.85	241.64	77.37	305.61	214.85	181.57
Am_HQ_75347	P:GO:0006544; P:GO:0006563; P:GO:0006566; F:GO:0008115; C:GO:0016021; P:GO:0046653	P:glycine metabolic process; P:L-serine metabolic process; P:threonine metabolic process; F:sarcosine oxidase activity; C:integral component of membrane; P:tetrahydrofolate metabolic process	K00306	PIPOX; sarcosine oxidase / L-pipecolate oxidase [EC:1.5.3.1 1.5.3.7]	A 9100 Metabolism; B 09105 Amino acid metabolism; C 00260 Glycine, serine and threonine metabolism [PATH:ko00260]|A 9100 Metabolism; B 09105 Amino acid metabolism; C 00310 Lysine degradation [PATH:ko00310]|A 9140 Cellular Processes; B 09141 Transport and catabolism; C 04146 Peroxisome [PATH:ko04146]	130.7	0.481338	0.983827	0.489251	0.624664	0.709672	130.7	7.99154	1.29407	6.17553	6.59427e-10	5.23044e-09	130.7	0.878938	0.984426	0.892843	0.371941	0.491048	439	26	48	261	146	119	0	2	1	142	117	153
Am_HQ_81404	F:GO:0003735; C:GO:0005840; P:GO:0006412; P:GO:0042254	F:structural constituent of ribosome; C:ribosome; P:translation; P:ribosome biogenesis	K02930	RP-L4e, RPL4; large subunit ribosomal protein L4e	A 9120 Genetic Information Processing; B 09122 Translation; C 03010 Ribosome [PATH:ko03010]|A 9160 Human Diseases; B 09172 Infectious disease: viral; C 05171 Coronavirus disease - COVID-19 [PATH:ko05171]	19.9359	8.82995	2.11335	4.17818	2.9385e-05	0.000103088	19.9359	4.9493	1.82695	2.70905	0.0067476	0.0143761	19.9359	8.84143	2.11335	4.18361	2.86912e-05	0.000131614	3	15	172	0	0	0	3	2	3	0	0	0
Am_HQ_84078	C:GO:0005886; P:GO:0009834; C:GO:0016021	C:plasma membrane; P:plant-type secondary cell wall biogenesis; C:integral component of membrane	.	.	.	52.9612	4.8376	1.4405	3.35827	0.000784308	0.00207515	52.9612	7.9689	1.74215	4.57418	4.78095e-06	2.0074e-05	52.9612	-1.96641	1.28503	-1.53024	0.125958	0.204378	57	42	3	2	0	3	0	0	0	77	58	427
Am_HQ_10835	F:GO:0003723; C:GO:0005634; C:GO:0005829	F:RNA binding; C:nucleus; C:cytosol	K12890	SRSF1, SFRS1, ASF, SF2; serine/arginine-rich splicing factor 1	A 9120 Genetic Information Processing; B 09121 Transcription; C 03040 Spliceosome [PATH:ko03040]|A 9150 Organismal Systems; B 09151 Immune system; C 04657 IL-17 signaling pathway [PATH:ko04657]|A 9160 Human Diseases; B 09172 Infectious disease: viral; C 05168 Herpes simplex virus 1 infection [PATH:ko05168]	150.956	-1.23823	0.713555	-1.7353	0.0826883	0.132467	150.956	-0.439893	0.715317	-0.614962	0.53858	0.631482	150.956	-1.41645	0.713263	-1.98588	0.047047	0.0885934	25.47	134.85	50.39	265.42	88.86	280.83	51.2	127.32	196.16	106.96	392.36	215.62
Am_HQ_62023	.	.	.	.	.	619.08	6.77049	0.970747	6.97451	3.06931e-12	2.86063e-11	619.08	1.89381	0.952556	1.98813	0.0467969	0.0797622	619.08	8.79984	1.02592	8.57754	9.69234e-18	3.71198e-16	244	1925	2722	7	10	44	371	829	502	11	3	0
Am_HQ_85898	C:GO:0005576; P:GO:0019953	C:extracellular region; P:sexual reproduction	.	.	.	9476.65	12.9453	0.950607	13.6179	3.13423e-42	3.23646e-40	9476.65	12.6393	0.937606	13.4803	2.04154e-41	3.92296e-39	9476.65	8.78093	0.881646	9.9597	2.28752e-23	1.64657e-21	46590.8	11176.4	30023.3	12.73	1	1	7.21	5	6.99	117.54	22.33	144.06
Am_HQ_10860	P:GO:0009987	P:cellular process	.	.	.	211.967	-0.674427	0.236682	-2.84951	0.00437871	0.0098434	211.967	-0.106336	0.239126	-0.444688	0.656545	0.737324	211.967	-0.340173	0.237905	-1.42987	0.152756	0.239472	150	162	106	278	264	355	139	232	235	206	237	271
Am_HQ_51476	F:GO:0008194; C:GO:0016021; C:GO:0043231; F:GO:0102241	F:UDP-glycosyltransferase activity; C:integral component of membrane; C:intracellular membrane-bounded organelle; F:soyasaponin III rhamnosyltransferase activity	K18823	UGT91H4; soyasaponin III rhamnosyltransferase [EC:2.4.1.273]	None	530.735	-9.56317	1.3914	-6.87306	6.28375e-12	5.64235e-11	530.735	-12.5096	1.39023	-8.99826	2.29313e-19	6.30268e-18	530.735	-11.4419	1.39041	-8.22912	1.88593e-16	6.19245e-15	0	0	0	191	260	91	1165	1316	1834	152	1304	608
Am_HQ_10866	F:GO:0003743; C:GO:0005840; P:GO:0006446; P:GO:0031047	F:translation initiation factor activity; C:ribosome; P:regulation of translational initiation; P:gene silencing by RNA	K11593	ELF2C, AGO; eukaryotic translation initiation factor 2C	A 9150 Organismal Systems; B 09158 Development and regeneration; C 04361 Axon regeneration [PATH:ko04361]	1162.03	0.935191	0.486578	1.92198	0.0546089	0.0924345	1162.03	0.33848	0.486243	0.696113	0.486358	0.581325	1162.03	-0.488735	0.485941	-1.00575	0.314536	0.430753	1323.6	962.46	704.02	414.03	855.12	881.37	676.26	923.35	1689.54	1178.39	1379.82	3264.56
Am_HQ_10874	C:GO:0071339; C:GO:0097344	C:MLL1 complex; C:Rix1 complex	K14827	IPI1, TEX10; pre-rRNA-processing protein IPI1	None	178.05	1.34821	2.16369	0.623108	0.533213	0.628056	178.05	2.82476	2.16546	1.30446	0.192077	0.269425	178.05	1.66589	2.16392	0.769849	0.441389	0.560082	676.1	190.79	10.1	317.99	145.58	0	65.52	103.22	0	247.05	143.1	0
Am_HQ_46066	F:GO:0003677; F:GO:0003700; C:GO:0005634; C:GO:0005667; P:GO:0006355; P:GO:0045893	F:DNA binding; F:DNA-binding transcription factor activity; C:nucleus; C:transcription regulator complex; P:regulation of transcription, DNA-templated; P:positive regulation of transcription, DNA-templated	.	.	.	257.896	-4.44654	0.455055	-9.77145	1.493e-22	3.93234e-21	257.896	7.93646	1.26252	6.28623	3.2527e-10	2.69611e-09	257.896	-0.852586	0.46343	-1.83973	0.0658081	0.118153	37	16	47.01	1137.17	896.41	916.22	0	0	0	69.39	96.08	82.82
Am_HQ_10881	F:GO:0016787; C:GO:0110165	F:hydrolase activity; C:cellular anatomical entity	.	.	.	443.842	0.20866	0.201938	1.03329	0.301469	0.39473	443.842	0.0982338	0.201698	0.487035	0.626234	0.711053	443.842	0.307488	0.202162	1.521	0.12826	0.207488	340	384	476	393	460	540	402	500	597	344	436	528
Am_HQ_10884	F:GO:0004843; P:GO:0016579; P:GO:0044267	F:cysteine-type deubiquitinase activity; P:protein deubiquitination; P:cellular protein metabolic process	K11855	USP36_42; ubiquitin carboxyl-terminal hydrolase 36/42 [EC:3.4.19.12]	None	362.808	0.919865	0.542629	1.6952	0.090037	0.142565	362.808	0.950984	0.5427	1.75232	0.0797188	0.126417	362.808	0.274142	0.541814	0.505972	0.612877	0.716845	361.91	222.57	627.58	196.15	204.48	496.99	213.69	203.07	445.1	339.07	305.49	739.67
Am_HQ_90129	.	.	.	.	.	481.736	-9.05481	1.54971	-5.84291	5.12968e-09	3.19762e-08	481.736	-12.3982	1.54816	-8.00837	1.16237e-15	2.04669e-14	481.736	-11.3301	1.54834	-7.31759	2.52463e-13	5.33868e-12	0	0	0	41	317	18	1822	1331	625	762	312	847
Am_HQ_1089	C:GO:0000151; C:GO:0005737; P:GO:0006511; P:GO:0009615; P:GO:0016567; F:GO:0016874; F:GO:0034450; F:GO:0046872; P:GO:0051726	C:ubiquitin ligase complex; C:cytoplasm; P:ubiquitin-dependent protein catabolic process; P:response to virus; P:protein ubiquitination; F:ligase activity; F:ubiquitin-ubiquitin ligase activity; F:metal ion binding; P:regulation of cell cycle	K12169	KPC1, RNF123; Kip1 ubiquitination-promoting complex protein 1 [EC:2.3.2.27]	None	580.706	-0.0419039	0.274878	-0.152445	0.878836	0.913649	580.706	0.248393	0.275309	0.902235	0.366932	0.461837	580.706	0.1914	0.275177	0.695553	0.486709	0.603822	332.73	538.31	657.27	749.54	653.85	660.17	395.86	586.02	734.83	470.46	595.05	721.16
Am_HQ_89470	F:GO:0005344; C:GO:0005737; P:GO:0015671; C:GO:0016363; F:GO:0019825; F:GO:0020037; F:GO:0046872	F:oxygen carrier activity; C:cytoplasm; P:oxygen transport; C:nuclear matrix; F:oxygen binding; F:heme binding; F:metal ion binding	.	.	.	5650.03	9.73958	0.564527	17.2527	1.0688e-66	3.37404e-64	5650.03	5.25674	0.542983	9.68122	3.62369e-22	1.35723e-20	5650.03	8.71977	0.553087	15.7657	5.36128e-56	3.59011e-53	23762	14565.6	13847.6	7.75	30.65	46.91	259.28	845.6	818.74	63.27	40.51	66.87
Am_HQ_50480	C:GO:0005576; C:GO:0005618; P:GO:0005982; P:GO:0005985; C:GO:0016021; F:GO:0030599; P:GO:0042545; P:GO:0043086; F:GO:0045330; P:GO:0045490; F:GO:0046910	C:extracellular region; C:cell wall; P:starch metabolic process; P:sucrose metabolic process; C:integral component of membrane; F:pectinesterase activity; P:cell wall modification; P:negative regulation of catalytic activity; F:aspartyl esterase activity; P:pectin catabolic process; F:pectinesterase inhibitor activity	K01051	E3.1.1.11; pectinesterase [EC:3.1.1.11]	A 9100 Metabolism; B 09101 Carbohydrate metabolism; C 00040 Pentose and glucuronate interconversions [PATH:ko00040]|A 9130 Environmental Information Processing; B 09132 Signal transduction; C 02020 Two-component system [PATH:ko02020]	1369.68	-4.71522	2.91552	-1.61729	0.105817	0.16352	1369.68	-13.5963	2.90602	-4.67868	2.88733e-06	1.25748e-05	1369.68	-1.07937	3.02094	-0.357295	0.720871	0.805593	0	1	0	0	36.44	0	12354	1560.41	2102.87	3	0	0
Am_HQ_58765	.	.	K05933	E1.14.17.4; aminocyclopropanecarboxylate oxidase [EC:1.14.17.4]	A 9100 Metabolism; B 09105 Amino acid metabolism; C 00270 Cysteine and methionine metabolism [PATH:ko00270]	150.553	9.93894	1.23474	8.04939	8.32063e-16	1.17114e-14	150.553	9.35639	1.08708	8.60694	7.50386e-18	1.71657e-16	150.553	8.60697	0.943932	9.11821	7.63779e-20	3.72889e-18	687.51	522.71	221.46	0	1	1.3	0	2.07	1.08	3.3	2.08	0
Am_HQ_14259	.	.	.	.	.	572.653	6.02005	1.66037	3.62573	0.000288144	0.000836826	572.653	7.86822	1.67737	4.69081	2.72125e-06	1.19007e-05	572.653	2.60994	1.65448	1.5775	0.114681	0.189234	119.44	739.63	3932.97	70.47	0	25.44	9.21	16.52	0	901.28	26.01	95.2
Am_HQ_67052	F:GO:0004108; P:GO:0006099; P:GO:0006101; P:GO:0046487	F:citrate (Si)-synthase activity; P:tricarboxylic acid cycle; P:citrate metabolic process; P:glyoxylate metabolic process	K01647	CS, gltA; citrate synthase [EC:2.3.3.1]	A 9100 Metabolism; B 09101 Carbohydrate metabolism; C 00020 Citrate cycle (TCA cycle) [PATH:ko00020]|A 9100 Metabolism; B 09101 Carbohydrate metabolism; C 00630 Glyoxylate and dicarboxylate metabolism [PATH:ko00630]	31.7646	8.57948	2.28358	3.75704	0.000171935	0.000523192	31.7646	9.53002	2.28358	4.17329	3.00233e-05	0.00010896	31.7646	8.59096	2.28358	3.76207	0.000168515	0.000639025	7	16	287	0	0	1	0	0	0	1	0	0
Am_HQ_54219	P:GO:0006629; C:GO:0016021; F:GO:0080019; F:GO:0102965	P:lipid metabolic process; C:integral component of membrane; F:fatty-acyl-CoA reductase (alcohol-forming) activity; F:alcohol-forming fatty acyl-CoA reductase activity	K13356	FAR; alcohol-forming fatty acyl-CoA reductase [EC:1.2.1.84]	A 9100 Metabolism; B 09103 Lipid metabolism; C 00073 Cutin, suberine and wax biosynthesis [PATH:ko00073]|A 9140 Cellular Processes; B 09141 Transport and catabolism; C 04146 Peroxisome [PATH:ko04146]|A 9150 Organismal Systems; B 09149 Aging; C 04212 Longevity regulating pathway - worm [PATH:ko04212]	719.179	-8.55204	1.37268	-6.23017	4.65919e-10	3.31484e-09	719.179	-13.5891	1.37001	-9.91893	3.44438e-23	1.42803e-21	719.179	0	1.80673	0	1	1	0	0	0	54.58	45.65	189.04	1220.11	3982.74	4176.62	0	0	0
Am_HQ_10923	P:GO:0042318; F:GO:0045439	P:penicillin biosynthetic process; F:isopenicillin-N epimerase activity	K22207	LCD; L-cysteine desulfhydrase [EC:4.4.1.28]	A 9100 Metabolism; B 09105 Amino acid metabolism; C 00270 Cysteine and methionine metabolism [PATH:ko00270]	488.394	0.547648	0.158962	3.44514	0.000570761	0.00155405	488.394	-0.0233492	0.157102	-0.148624	0.88185	0.914995	488.394	-0.169929	0.156647	-1.08479	0.278016	0.389832	412	445	386	323	386	432	462	589	637	520	670	696
Am_HQ_70635	F:GO:0005515; P:GO:0006006; P:GO:0006096; C:GO:0009507; P:GO:0015976; P:GO:0019253; F:GO:0047100; F:GO:0050661; F:GO:0051287	F:protein binding; P:glucose metabolic process; P:glycolytic process; C:chloroplast; P:carbon utilization; P:reductive pentose-phosphate cycle; F:glyceraldehyde-3-phosphate dehydrogenase (NADP+) (phosphorylating) activity; F:NADP binding; F:NAD binding	K05298	GAPA; glyceraldehyde-3-phosphate dehydrogenase (NADP+) (phosphorylating) [EC:1.2.1.13]	A 9100 Metabolism; B 09102 Energy metabolism; C 00710 Carbon fixation in photosynthetic organisms [PATH:ko00710]	1113.62	-13.5881	1.82822	-7.43244	1.06616e-13	1.17682e-12	1113.62	-12.2347	1.82832	-6.69178	2.20475e-11	2.18772e-10	1113.62	-11.3024	1.82846	-6.1814	6.35351e-10	7.65956e-09	0	0	0	4937.64	3546.24	105.39	1581.51	1698.8	68.27	1052.28	740.42	49.91
Am_HQ_10933	F:GO:0003677; F:GO:0046983	F:DNA binding; F:protein dimerization activity	.	.	.	126.938	0.0311881	0.435026	0.0716925	0.942847	0.960759	126.938	0.657959	0.43773	1.50311	0.132809	0.196876	126.938	0.617034	0.437374	1.41077	0.158313	0.246639	116	79	179	203	92	203	111	104	100	122	119	90
Am_HQ_10934	P:GO:0002100; F:GO:0004131; P:GO:0006206; F:GO:0052717; C:GO:0052718; F:GO:0102480	P:tRNA wobble adenosine to inosine editing; F:cytosine deaminase activity; P:pyrimidine nucleobase metabolic process; F:tRNA-specific adenosine-34 deaminase activity; C:tRNA-specific adenosine-34 deaminase complex; F:5-fluorocytosine deaminase activity	K15442	TAD3, ADAT3; tRNA-specific adenosine deaminase 3	None	100.316	-2.49652	4.08415	-0.61127	NA	NA	100.316	21.6413	4.25021	5.09182	NA	NA	100.316	-2.55688	4.08413	-0.626052	NA	NA	0	87.47	0	0	560.99	0	0	0	0	0	607.96	0
Am_HQ_10940	.	.	.	.	.	134.434	-1.72605	1.98647	-0.868906	0.384898	0.482481	134.434	-2.0383	1.98631	-1.02617	0.30481	0.397105	134.434	0.49043	1.98945	0.246516	0.805283	0.869371	0	89.72	62.56	3.07	246.53	414.73	1.06	282.23	564.22	0	31.42	110.24
Am_HQ_68312	C:GO:0005886; C:GO:0016021; F:GO:0022857; P:GO:0055085	C:plasma membrane; C:integral component of membrane; F:transmembrane transporter activity; P:transmembrane transport	.	.	.	295.277	-3.05437	1.41208	-2.16302	0.0305395	0.0553891	295.277	-7.90675	1.35108	-5.85219	4.85156e-09	3.36081e-08	295.277	-11.2451	1.34903	-8.33569	7.70457e-17	2.66858e-15	1	0	0	4	3	5	106	82	156	512	2359	613
Am_HQ_10951	C:GO:0005737; F:GO:0019901	C:cytoplasm; F:protein kinase binding	.	.	.	498.299	-1.44928	0.840166	-1.72499	0.0845291	0.134989	498.299	0.496701	0.841493	0.590262	0.555015	0.646771	498.299	-1.07055	0.840297	-1.27402	0.202657	0.301794	50.2	432.45	300.24	1331.65	426.74	937.46	51.42	288.95	399.09	1335.14	318.4	425.9
Am_HQ_10952	F:GO:0004527; P:GO:0016070; P:GO:0090305	F:exonuclease activity; P:RNA metabolic process; P:nucleic acid phosphodiester bond hydrolysis	.	.	.	248.111	1.41752	1.2002	1.18107	0.237575	0.32359	248.111	1.23998	1.20002	1.0333	0.301465	0.393467	248.111	0.798349	1.19959	0.665516	0.50572	0.621446	580.06	373.42	35.09	234.06	224.12	27.57	245.48	280.76	19.67	364.7	381.33	29.48
Am_HQ_51441	P:GO:0006855	P:xenobiotic transmembrane transport	K03327	TC.MATE, SLC47A, norM, mdtK, dinF; multidrug resistance protein, MATE family	None	81.6548	10.8925	2.2373	4.86862	1.12381e-06	4.99979e-06	81.6548	6.70074	1.95623	3.42533	0.000614044	0.00167376	81.6548	8.50054	2.08109	4.08466	4.41411e-05	0.000192925	61.9	276.91	469.71	0	0	0	0	0	10.96	0	0	3.21
Am_HQ_10961	.	.	K15121	SLC25A44; solute carrier family 25, member 44	None	129.715	-0.199835	0.586869	-0.340511	0.733472	0.800882	129.715	-0.65878	0.585781	-1.12462	0.260751	0.349048	129.715	0.424031	0.589019	0.719894	0.47159	0.589127	25.77	149.17	119.76	129.02	132.2	176.32	107	173.63	332.87	139.16	72.26	71
Am_HQ_86755	P:GO:0009416; C:GO:0009522; C:GO:0009523; C:GO:0009535; P:GO:0009768; C:GO:0009941; C:GO:0010287; C:GO:0016021; F:GO:0016168; P:GO:0018298; F:GO:0046872	P:response to light stimulus; C:photosystem I; C:photosystem II; C:chloroplast thylakoid membrane; P:photosynthesis, light harvesting in photosystem I; C:chloroplast envelope; C:plastoglobule; C:integral component of membrane; F:chlorophyll binding; P:protein-chromophore linkage; F:metal ion binding	K08913	LHCB2; light-harvesting complex II chlorophyll a/b binding protein 2	A 9100 Metabolism; B 09102 Energy metabolism; C 00196 Photosynthesis - antenna proteins [PATH:ko00196]	6847.68	-12.3514	0.703378	-17.5601	4.97655e-69	1.80282e-66	6847.68	-12.5217	0.703373	-17.8023	6.78283e-71	6.24529e-68	6847.68	-11.2311	0.703427	-15.9662	2.198e-57	1.67488e-54	0	5	0	9666.27	10922.7	14177	14544	10542.4	12814.5	6096.79	4269.71	5606.76
Am_HQ_40535	F:GO:0003885; C:GO:0016020; P:GO:0019852; F:GO:0050105; F:GO:0071949	F:D-arabinono-1,4-lactone oxidase activity; C:membrane; P:L-ascorbic acid metabolic process; F:L-gulonolactone oxidase activity; F:FAD binding	K00103	GULO; L-gulonolactone oxidase [EC:1.1.3.8]	A 9100 Metabolism; B 09101 Carbohydrate metabolism; C 00053 Ascorbate and aldarate metabolism [PATH:ko00053]	276.55	9.41721	1.00461	9.37403	6.98158e-21	1.58397e-19	276.55	5.62893	0.796049	7.07108	1.53732e-12	1.77862e-11	276.55	8.45735	0.900432	9.39254	5.85677e-21	3.30161e-19	529	697	1418	5	0	0	25	18	27	1	8	1
Am_HQ_10974	F:GO:0004721; P:GO:0006470; F:GO:0046872	F:phosphoprotein phosphatase activity; P:protein dephosphorylation; F:metal ion binding	.	.	.	88.6271	-3.40889	1.36747	-2.49284	0.0126727	0.0254282	88.6271	-1.40819	1.37089	-1.02721	0.304322	0.396563	88.6271	-1.90742	1.3695	-1.39279	0.163684	0.253346	0	20.43	29.85	185.52	242.41	254.35	0	68.51	113.3	98.08	93.16	48.98
Am_HQ_10979	F:GO:0003723; C:GO:0005634; P:GO:0006355; F:GO:0046872	F:RNA binding; C:nucleus; P:regulation of transcription, DNA-templated; F:metal ion binding	.	.	.	162.178	-1.01992	0.563059	-1.81139	0.0700803	0.114824	162.178	-0.525973	0.564085	-0.932436	0.351111	0.445706	162.178	-0.188802	0.564904	-0.33422	0.738213	0.818725	83.45	155.71	48.59	209.79	324.49	222.95	89.26	292.24	169.79	85.97	228.72	115.51
Am_HQ_67310	F:GO:0003680; C:GO:0016021	F:minor groove of adenine-thymine-rich DNA binding; C:integral component of membrane	.	.	.	269.115	9.4452	0.804161	11.7454	7.45591e-32	3.91356e-30	269.115	7.91772	0.612645	12.9238	3.30315e-38	5.1044e-36	269.115	8.44372	0.660633	12.7813	2.08682e-37	4.90581e-35	703	785	1113	1	2	2	8	1	5	4	5	1
Am_HQ_86979	F:GO:0003676; P:GO:0006570; F:GO:0016206; P:GO:0019438; P:GO:0032259; F:GO:0046983; F:GO:0102084; F:GO:0102938	F:nucleic acid binding; P:tyrosine metabolic process; F:catechol O-methyltransferase activity; P:aromatic compound biosynthetic process; P:methylation; F:protein dimerization activity; F:L-dopa O-methyltransferase activity; F:orcinol O-methyltransferase activity	.	.	.	236.983	-9.64605	1.22394	-7.88113	3.24442e-15	4.29828e-14	236.983	-9.96632	1.22367	-8.14464	3.80426e-16	7.11223e-15	236.983	-11.2185	1.22298	-9.17312	4.5952e-20	2.31837e-18	0	0	0	138.01	202.29	258	229.26	200.01	304.52	643.78	409.72	721.38
Am_HQ_10985	.	.	.	.	.	252.694	-3.99986	1.11708	-3.58065	0.000342745	0.000982102	252.694	-0.40984	1.12107	-0.365579	0.714679	0.785486	252.694	-0.877406	1.1198	-0.783536	0.433313	0.552434	2	129.98	3	435.05	977.8	1249.7	27.19	55.6	144	79.83	81.93	142
Am_HQ_61370	P:GO:0006952	P:defense response	.	.	.	187.252	-9.85385	1.31407	-7.4987	6.44542e-14	7.31164e-13	187.252	-4.51632	1.35951	-3.32202	0.000893667	0.00234178	187.252	-11.203	1.31336	-8.53002	1.46328e-17	5.50863e-16	0	0	0	259	260	149	3	8	6	916	534.02	282
Am_HQ_80759	F:GO:0004601; C:GO:0005576; P:GO:0006804; P:GO:0006979; F:GO:0020037; P:GO:0042744; F:GO:0046872; P:GO:0098869	F:peroxidase activity; C:extracellular region; P:obsolete peroxidase reaction; P:response to oxidative stress; F:heme binding; P:hydrogen peroxide catabolic process; F:metal ion binding; P:cellular oxidant detoxification	K00430	E1.11.1.7; peroxidase [EC:1.11.1.7]	A 9100 Metabolism; B 09110 Biosynthesis of other secondary metabolites; C 00940 Phenylpropanoid biosynthesis [PATH:ko00940]	27.2118	5.42432	1.38309	3.92187	8.78629e-05	0.00028135	27.2118	7.81699	1.60874	4.85909	1.17928e-06	5.52111e-06	27.2118	-0.848233	1.09982	-0.771245	0.440562	0.559578	26	60	11	0	1	2	0	0	0	14	99	117
Am_HQ_56418	C:GO:0016021; F:GO:0016758	C:integral component of membrane; F:hexosyltransferase activity	.	.	.	717.839	-0.45027	1.60702	-0.280189	0.779332	0.837458	717.839	-5.56684	1.60456	-3.46939	0.000521632	0.00144232	717.839	8.42046	1.99046	4.23041	2.33261e-05	0.000108977	87.36	6.03	38.03	0	237.07	9.14	3834.8	2132.27	2607.78	0	0	0
Am_HQ_62743	.	.	.	.	.	85.9389	3.46768	2.4032	1.44294	0.149037	0.218542	85.9389	5.14344	2.41392	2.13074	0.0331106	0.0588608	85.9389	8.40983	2.5411	3.30952	0.000934548	0.00292765	418.49	34.5	249.48	0	85.69	0	0	0	31.48	0	0.73	1.66
Am_HQ_13491	P:GO:0006633; F:GO:0016702; P:GO:0031408; F:GO:0046872	P:fatty acid biosynthetic process; F:oxidoreductase activity, acting on single donors with incorporation of molecular oxygen, incorporation of two atoms of oxygen; P:oxylipin biosynthetic process; F:metal ion binding	K15718	LOX1_5; linoleate 9S-lipoxygenase [EC:1.13.11.58]	A 9100 Metabolism; B 09103 Lipid metabolism; C 00591 Linoleic acid metabolism [PATH:ko00591]	3474.76	-8.08143	1.29264	-6.2519	4.05493e-10	2.91211e-09	3474.76	-9.85665	1.29248	-7.62617	2.41837e-14	3.57705e-13	3474.76	-11.1177	1.29244	-8.60215	7.82365e-18	3.0225e-16	0	1.31	8.91	1328.41	1929.75	157.43	2684.76	7936.39	1559.49	6298.21	21996.5	831.57
Am_HQ_60690	P:GO:0006520; F:GO:0016847; F:GO:0030170; P:GO:0042218	P:cellular amino acid metabolic process; F:1-aminocyclopropane-1-carboxylate synthase activity; F:pyridoxal phosphate binding; P:1-aminocyclopropane-1-carboxylate biosynthetic process	K20772	ACS1_2_6; 1-aminocyclopropane-1-carboxylate synthase 1/2/6 [EC:4.4.1.14]	A 9100 Metabolism; B 09105 Amino acid metabolism; C 00270 Cysteine and methionine metabolism [PATH:ko00270]|A 9130 Environmental Information Processing; B 09132 Signal transduction; C 04016 MAPK signaling pathway - plant [PATH:ko04016]	180.76	7.28473	1.0153	7.17498	7.23156e-13	7.30361e-12	180.76	2.49253	0.934203	2.66808	0.00762865	0.0160301	180.76	8.39417	1.1034	7.60755	2.79338e-14	6.83588e-13	67	387	1066	3	3	7	33	147	188	0	2	4
Am_HQ_15091	C:GO:0008540; P:GO:0030163; F:GO:0030234; P:GO:0042176; P:GO:0050790	C:proteasome regulatory particle, base subcomplex; P:protein catabolic process; F:enzyme regulator activity; P:regulation of protein catabolic process; P:regulation of catalytic activity	K03028	PSMD2, RPN1; 26S proteasome regulatory subunit N1	A 9120 Genetic Information Processing; B 09123 Folding, sorting and degradation; C 03050 Proteasome [PATH:ko03050]|A 9160 Human Diseases; B 09172 Infectious disease: viral; C 05169 Epstein-Barr virus infection [PATH:ko05169]|A 9160 Human Diseases; B 09164 Neurodegenerative disease; C 05010 Alzheimer disease [PATH:ko05010]|A 9160 Human Diseases; B 09164 Neurodegenerative disease; C 05012 Parkinson…	209.847	12.2672	3.4352	3.57104	0.000355565	0.00101555	209.847	12.256	3.4352	3.56776	0.00036004	0.00103623	209.847	8.39072	3.26618	2.56897	0.0102	0.0239075	941.8	295.24	721.91	0	0	0	0	0	0	7.81	0	0
Am_HQ_11013	.	.	.	.	.	173.154	0.39665	0.371219	1.06851	0.285292	0.376852	173.154	0.603762	0.372087	1.62264	0.104667	0.160253	173.154	0.373003	0.371081	1.00518	0.31481	0.431074	190	202	136	99	167	285	102	185	183	147	195	209
Am_HQ_36575	P:GO:0000054; P:GO:0002181; F:GO:0005516; F:GO:0005524; C:GO:0005829; C:GO:0005844; P:GO:0006364; P:GO:0006415; P:GO:0006450; P:GO:0006452; F:GO:0016887; P:GO:0042149; F:GO:0051082; P:GO:0051083	P:ribosomal subunit export from nucleus; P:cytoplasmic translation; F:calmodulin binding; F:ATP binding; C:cytosol; C:polysome; P:rRNA processing; P:translational termination; P:regulation of translational fidelity; P:translational frameshifting; F:ATP hydrolysis activity; P:cellular response to glucose starvation; F:unfolded protein binding; P:'de novo' cotranslational protein folding	K03283	HSPA1s; heat shock 70kDa protein 1/2/6/8	A 9120 Genetic Information Processing; B 09121 Transcription; C 03040 Spliceosome [PATH:ko03040]|A 9120 Genetic Information Processing; B 09123 Folding, sorting and degradation; C 04141 Protein processing in endoplasmic reticulum [PATH:ko04141]|A 9130 Environmental Information Processing; B 09132 Signal transduction; C 04010 MAPK signaling pathway [PATH:ko04010]|A 9140 Cellular Processes; B 09141…	49.0192	10.1674	1.9561	5.19779	2.01668e-07	9.94522e-07	49.0192	9.19436	1.9561	4.70035	2.59716e-06	1.14054e-05	49.0192	8.32723	1.8665	4.4614	8.14251e-06	4.23272e-05	13	43	424	0	0	0	0	0	1	1	0	1
Am_HQ_89466	.	.	.	.	.	2305.92	10.2645	0.50201	20.4467	6.42607e-93	7.10017e-90	2305.92	10.1418	0.495628	20.4626	4.64146e-93	1.28209e-89	2305.92	8.22215	0.432295	19.0198	1.16944e-80	2.58422e-77	10205	5735	5807	11	8	5	11	6	9	25	36	40
Am_HQ_11021	.	.	.	.	.	495.134	1.33441	0.470512	2.83609	0.004567	0.0102189	495.134	0.768225	0.469773	1.63531	0.101984	0.156852	495.134	0.53127	0.469505	1.13155	0.257822	0.367642	568	604	628	232	422	296	245	595	606	392	948	327
Am_HQ_55868	F:GO:0003962; P:GO:0006555; P:GO:0019346; F:GO:0030170	F:cystathionine gamma-synthase activity; P:methionine metabolic process; P:transsulfuration; F:pyridoxal phosphate binding	K01739	metB; cystathionine gamma-synthase [EC:2.5.1.48]	A 9100 Metabolism; B 09102 Energy metabolism; C 00920 Sulfur metabolism [PATH:ko00920]|A 9100 Metabolism; B 09105 Amino acid metabolism; C 00270 Cysteine and methionine metabolism [PATH:ko00270]|A 9100 Metabolism; B 09106 Metabolism of other amino acids; C 00450 Selenocompound metabolism [PATH:ko00450]	3199.09	-6.71641	0.629709	-10.6659	1.46961e-26	5.49498e-25	3199.09	-7.68785	0.629257	-12.2173	2.51144e-34	2.81715e-32	3199.09	-11.069	0.628821	-17.6027	2.34699e-69	2.59319e-66	0	6.53	6.33	906.78	437.86	394.42	811.79	1729.44	951.06	10059.9	12060.5	14617
Am_HQ_48324	F:GO:0005506; C:GO:0016021; F:GO:0016709; F:GO:0020037	F:iron ion binding; C:integral component of membrane; F:oxidoreductase activity, acting on paired donors, with incorporation or reduction of molecular oxygen, NAD(P)H as one donor, and incorporation of one atom of oxygen; F:heme binding	K17961	CYP82G1; trimethyltridecatetraene/dimethylnonatriene synthase [EC:1.14.14.58 1.14.14.59]	A 9100 Metabolism; B 09109 Metabolism of terpenoids and polyketides; C 00904 Diterpenoid biosynthesis [PATH:ko00904]	431.826	-11.2697	1.41413	-7.96937	1.59489e-15	2.18499e-14	431.826	-11.5621	1.41406	-8.17651	2.92178e-16	5.51841e-15	431.826	-11.0581	1.41419	-7.81941	5.30707e-15	1.43194e-13	0	0	0	423	560	872	92	744	1540	312	614	665
Am_HQ_11037	C:GO:0016021	C:integral component of membrane	.	.	.	106.367	-1.87026	0.806705	-2.31839	0.0204279	0.0388081	106.367	-0.208162	0.810568	-0.25681	0.797325	0.851421	106.367	-0.102993	0.810869	-0.127016	0.898928	0.936975	75.46	20.06	48.7	451.74	135.12	123.73	108.36	38.31	76.56	125.18	56.43	34.1
Am_HQ_37501	P:GO:0005982; P:GO:0005985; C:GO:0016021; F:GO:0030599; P:GO:0042545; P:GO:0043086; F:GO:0045330; P:GO:0045490; F:GO:0046910	P:starch metabolic process; P:sucrose metabolic process; C:integral component of membrane; F:pectinesterase activity; P:cell wall modification; P:negative regulation of catalytic activity; F:aspartyl esterase activity; P:pectin catabolic process; F:pectinesterase inhibitor activity	.	.	.	621.235	-5.36572	2.95945	-1.81308	0.0698189	0.114438	621.235	-13.4155	2.94786	-4.55092	5.3411e-06	2.22694e-05	621.235	0	3.17445	0	1	1	0	0	0	1	28	0	5446	1074	750	0	0	0
Am_HQ_1104	F:GO:0003676; F:GO:0003964; P:GO:0006278; P:GO:0015074	F:nucleic acid binding; F:RNA-directed DNA polymerase activity; P:RNA-templated DNA biosynthetic process; P:DNA integration	K13217	PRPF39, PRP39; pre-mRNA-processing factor 39	None	504.968	-0.734643	3.15316	-0.232986	0.815772	0.866221	504.968	-0.701378	3.15317	-0.222436	0.823975	0.871289	504.968	-0.251873	3.15323	-0.0798779	0.936334	0.963318	300.32	0	564.11	509.75	0	1619.07	606.66	0	1371.01	379.71	0	1089.81
Am_HQ_11041	F:GO:0005247; C:GO:0009705; F:GO:0015108; C:GO:0016021; P:GO:1902476	F:voltage-gated chloride channel activity; C:plant-type vacuole membrane; F:chloride transmembrane transporter activity; C:integral component of membrane; P:chloride transmembrane transport	K05016	CLCN7; chloride channel 7	None	225.051	-0.235107	0.398325	-0.590238	0.555031	0.647781	225.051	0.302601	0.399761	0.756956	0.449076	0.544808	225.051	-0.0980834	0.398597	-0.246071	0.805627	0.869572	105.59	157.29	282	254.83	225.67	379.86	113.7	212.96	269.55	212.16	315.35	251.36
Am_HQ_11044	.	.	.	.	.	146.696	-1.20577	0.98176	-1.22818	0.219381	0.303012	146.696	-0.747157	0.982411	-0.760533	0.446936	0.54251	146.696	-0.969571	0.982038	-0.987306	0.323493	0.440317	98.57	86.26	17.73	237.34	328.39	41.8	106.2	288.41	63.97	245.11	256.47	32.55
Am_HQ_13409	P:GO:0006633; F:GO:0016702; P:GO:0031408; F:GO:0046872	P:fatty acid biosynthetic process; F:oxidoreductase activity, acting on single donors with incorporation of molecular oxygen, incorporation of two atoms of oxygen; P:oxylipin biosynthetic process; F:metal ion binding	K15718	LOX1_5; linoleate 9S-lipoxygenase [EC:1.13.11.58]	A 9100 Metabolism; B 09103 Lipid metabolism; C 00591 Linoleic acid metabolism [PATH:ko00591]	30899.8	-9.04217	1.29944	-6.95849	3.43928e-12	3.18396e-11	30899.8	-11.7648	1.29942	-9.05384	1.38027e-19	3.92046e-18	30899.8	-10.9979	1.29943	-8.46366	2.59122e-17	9.40243e-16	38.68	7.13	0	8971.37	22093	2559.5	41394	119982	73121.6	6125.83	118386	10718.1
Am_HQ_11049	F:GO:0000257; P:GO:0019499; P:GO:0050898; F:GO:0080109	F:nitrilase activity; P:cyanide metabolic process; P:nitrile metabolic process; F:indole-3-acetonitrile nitrile hydratase activity	K13035	NIT4; beta-cyano-L-alanine hydratase/nitrilase [EC:3.5.5.4 4.2.1.65]	A 9100 Metabolism; B 09106 Metabolism of other amino acids; C 00460 Cyanoamino acid metabolism [PATH:ko00460]	456.53	0.331363	0.56235	0.589247	0.555696	0.648385	456.53	0.653484	0.562679	1.16138	0.245488	0.331386	456.53	0.410251	0.562406	0.729456	0.465723	0.58352	823.93	278.95	226.05	613.78	456.6	389.82	210.88	539.87	458.34	512.55	352.14	552.56
Am_HQ_31706	C:GO:0016021	C:integral component of membrane	.	.	.	653.903	-9.67335	2.81761	-3.43318	0.000596556	0.00161791	653.903	-13.388	2.81704	-4.75249	2.00926e-06	8.99104e-06	653.903	-2.96535	2.88001	-1.02963	0.303182	0.41821	0	0	0	0	345.22	267.66	456.4	4264.38	3552.98	0	0	5.8
Am_HQ_67069	F:GO:0005506; C:GO:0005829; P:GO:0009228; C:GO:0009570; F:GO:0016763; P:GO:0052837	F:iron ion binding; C:cytosol; P:thiamine biosynthetic process; C:chloroplast stroma; F:pentosyltransferase activity; P:thiazole biosynthetic process	K03146	THI4, THI1; cysteine-dependent adenosine diphosphate thiazole synthase [EC:2.4.2.60]	A 9100 Metabolism; B 09108 Metabolism of cofactors and vitamins; C 00730 Thiamine metabolism [PATH:ko00730]	325.494	-11.7362	1.3446	-8.72841	2.58274e-18	4.63257e-17	325.494	-8.18478	1.34794	-6.07205	1.2629e-09	9.59021e-09	325.494	-10.9977	1.3448	-8.17793	2.88767e-16	9.29549e-15	0	0	0	774.13	372.94	1448.11	50.4	57.19	110.61	838.87	198.11	477.05
Am_HQ_66877	C:GO:0005887; F:GO:0022857; P:GO:0055085	C:integral component of plasma membrane; F:transmembrane transporter activity; P:transmembrane transport	.	.	.	256.406	5.68878	1.84227	3.08792	0.00201561	0.00488119	256.406	3.59964	1.83487	1.9618	0.0497861	0.0842399	256.406	8.22001	1.88743	4.35513	1.32989e-05	6.58007e-05	968.55	0	1180.21	16.99	5.88	38.28	55.83	9.09	193.26	9.85	0	0
Am_HQ_38872	F:GO:0005515; C:GO:0009522; C:GO:0009523; C:GO:0009535; P:GO:0009765; C:GO:0016021; F:GO:0016168; P:GO:0018298; F:GO:0046872	F:protein binding; C:photosystem I; C:photosystem II; C:chloroplast thylakoid membrane; P:photosynthesis, light harvesting; C:integral component of membrane; F:chlorophyll binding; P:protein-chromophore linkage; F:metal ion binding	K08912	LHCB1; light-harvesting complex II chlorophyll a/b binding protein 1	A 9100 Metabolism; B 09102 Energy metabolism; C 00196 Photosynthesis - antenna proteins [PATH:ko00196]	22779.5	-11.4909	0.704178	-16.3182	7.32945e-60	1.74157e-57	22779.5	-11.0301	0.704183	-15.6637	2.67913e-55	1.25965e-52	22779.5	-10.9574	0.704183	-15.5605	1.35052e-54	8.77757e-52	1	27.4	6	21270.2	34366.3	71286.2	18828	23345.3	49030.2	24946.6	22419.3	38473.6
Am_HQ_40153	F:GO:0005515; C:GO:0009522; C:GO:0009523; C:GO:0009535; P:GO:0009765; C:GO:0016021; F:GO:0016168; P:GO:0018298; F:GO:0046872	F:protein binding; C:photosystem I; C:photosystem II; C:chloroplast thylakoid membrane; P:photosynthesis, light harvesting; C:integral component of membrane; F:chlorophyll binding; P:protein-chromophore linkage; F:metal ion binding	K08912	LHCB1; light-harvesting complex II chlorophyll a/b binding protein 1	A 9100 Metabolism; B 09102 Energy metabolism; C 00196 Photosynthesis - antenna proteins [PATH:ko00196]	12315.6	-11.371	2.50768	-4.53447	5.77475e-06	2.28857e-05	12315.6	-10.8106	2.50769	-4.31099	1.62527e-05	6.2062e-05	12315.6	-10.8938	2.50769	-4.34416	1.39807e-05	6.88382e-05	0	20.6	0	24402.8	38913.7	52.76	19240	23605.7	24.85	27169.4	20278.7	10.42
Am_HQ_74057	.	.	.	.	.	157.707	-8.77046	1.21896	-7.19502	6.24535e-13	6.37458e-12	157.707	-8.96541	1.21865	-7.35684	1.88318e-13	2.47117e-12	157.707	-10.8505	1.21692	-8.91633	4.82006e-19	2.12602e-17	0	0	0	100	121	99	122	115	127	526	500	338
Am_HQ_11081	F:GO:0005524; C:GO:0005634; C:GO:0005829	F:ATP binding; C:nucleus; C:cytosol	K09489	HSPA4; heat shock 70kDa protein 4	A 9140 Cellular Processes; B 09144 Cellular community - eukaryotes; C 04530 Tight junction [PATH:ko04530]|A 9150 Organismal Systems; B 09151 Immune system; C 04612 Antigen processing and presentation [PATH:ko04612]|A 9160 Human Diseases; B 09166 Cardiovascular disease; C 05417 Lipid and atherosclerosis [PATH:ko05417]	246.134	-0.116162	0.52042	-0.223208	0.823373	0.872239	246.134	-0.592441	0.519677	-1.14002	0.254279	0.34175	246.134	-0.13045	0.520365	-0.250689	0.802055	0.866801	173.83	241.05	101.19	201.98	319.4	213.15	464.31	333.06	185.4	221	362.5	166.42
Am_HQ_56860	F:GO:0004564; P:GO:0005982; P:GO:0005985; P:GO:0006012; C:GO:0016021	F:beta-fructofuranosidase activity; P:starch metabolic process; P:sucrose metabolic process; P:galactose metabolic process; C:integral component of membrane	K01193	INV, sacA; beta-fructofuranosidase [EC:3.2.1.26]	A 9100 Metabolism; B 09101 Carbohydrate metabolism; C 00052 Galactose metabolism [PATH:ko00052]|A 9100 Metabolism; B 09101 Carbohydrate metabolism; C 00500 Starch and sucrose metabolism [PATH:ko00500]	284.037	9.1581	1.42204	6.4401	1.19399e-10	9.12334e-10	284.037	4.84241	1.30537	3.70961	0.000207581	0.00062915	284.037	8.21785	1.36385	6.02546	1.68629e-09	1.90121e-08	72	256	2360	1	5	0	66	16	35	8	0	4
Am_HQ_1109	F:GO:0046872	F:metal ion binding	K22909	ZC3H13; zinc finger CCCH domain-containing protein 13	None	165.508	-1.06667	1.57992	-0.675143	0.499585	0.596361	165.508	-0.357058	1.58049	-0.225916	0.821266	0.869394	165.508	-0.63356	1.58021	-0.400934	0.688469	0.780595	78.3	206.39	0	184.36	178.56	421	0	247.94	247.4	127.65	216.86	224.86
Am_HQ_11091	F:GO:0003723	F:RNA binding	.	.	.	261.573	0.0455235	0.477164	0.0954043	0.923994	0.947358	261.573	0.320582	0.477705	0.671088	0.502164	0.596764	261.573	0.15656	0.477331	0.327989	0.74292	0.822746	387	126	150	264	325	309	194	268	283	208	347	284
Am_HQ_66538	C:GO:0016021; F:GO:0030246	C:integral component of membrane; F:carbohydrate binding	.	.	.	3180.5	6.121	0.884418	6.92094	4.48662e-12	4.10539e-11	3180.5	2.59429	0.882272	2.94047	0.0032772	0.00751432	3180.5	8.21384	0.891955	9.2088	3.29777e-20	1.69081e-18	1155	5697	19864	100	103	321	1187	1393	3369	14	23	84
Am_HQ_58362	F:GO:0004497; F:GO:0005506; C:GO:0016021; F:GO:0016705; F:GO:0020037	F:monooxygenase activity; F:iron ion binding; C:integral component of membrane; F:oxidoreductase activity, acting on paired donors, with incorporation or reduction of molecular oxygen; F:heme binding	.	.	.	788.337	-10.6979	1.2095	-8.84493	9.15849e-19	1.70789e-17	788.337	-13.3465	1.20891	-11.0401	2.44656e-28	1.62844e-26	788.337	-10.8466	1.20942	-8.96845	3.00717e-19	1.37015e-17	0	0	0	373	427	423	2058	2788	2836	546	293	531
Am_HQ_11104	.	.	.	.	.	144.828	-0.783113	0.519691	-1.50688	0.131841	0.196919	144.828	0.261782	0.523056	0.500485	0.616733	0.702939	144.828	-0.56146	0.52017	-1.07938	0.280419	0.39252	93.43	117.75	71.03	203.1	152.85	299.25	37.58	83.09	206.21	139.74	163.46	258.12
Am_HQ_11106	F:GO:0043531	F:ADP binding	.	.	.	601.215	-0.443044	0.333579	-1.32815	0.184127	0.261016	601.215	0.708853	0.335252	2.11439	0.0344819	0.0609927	601.215	-0.684462	0.333359	-2.05323	0.0400505	0.0772823	365	275	627	699	809	814	252	373	429	894	1087	777
Am_HQ_89651	F:GO:0004497; C:GO:0009573; P:GO:0009853; F:GO:0016984; P:GO:0019253; P:GO:0046487	F:monooxygenase activity; C:chloroplast ribulose bisphosphate carboxylase complex; P:photorespiration; F:ribulose-bisphosphate carboxylase activity; P:reductive pentose-phosphate cycle; P:glyoxylate metabolic process	K01602	rbcS, cbbS; ribulose-bisphosphate carboxylase small chain [EC:4.1.1.39]	A 9100 Metabolism; B 09101 Carbohydrate metabolism; C 00630 Glyoxylate and dicarboxylate metabolism [PATH:ko00630]|A 9100 Metabolism; B 09102 Energy metabolism; C 00710 Carbon fixation in photosynthetic organisms [PATH:ko00710]	2192.07	-11.9544	0.927932	-12.8828	5.62608e-38	4.39311e-36	2192.07	-10.338	0.92808	-11.1391	8.0931e-29	5.73209e-27	2192.07	-10.8295	0.928014	-11.6696	1.82352e-31	2.81791e-29	2	0	1	4714.44	4072.36	7458.71	909.21	1879.13	2565.04	2171.7	1603.27	3669.37
Am_HQ_59009	F:GO:0004553; P:GO:0005975	F:hydrolase activity, hydrolyzing O-glycosyl compounds; P:carbohydrate metabolic process	K01210	E3.2.1.58; glucan 1,3-beta-glucosidase [EC:3.2.1.58]	A 9100 Metabolism; B 09101 Carbohydrate metabolism; C 00500 Starch and sucrose metabolism [PATH:ko00500]	46.0535	10.0789	2.83471	3.55551	0.000377241	0.0010711	46.0535	10.0676	2.83471	3.55154	0.000382979	0.00109427	46.0535	8.20832	2.76975	2.96356	0.00304099	0.00828809	2	13	435	0	0	0	0	0	0	2	0	0
Am_HQ_11114	.	.	.	.	.	361.383	0.448976	0.344857	1.30192	0.192944	0.271416	361.383	-0.295375	0.343568	-0.859729	0.389938	0.485511	361.383	0.454076	0.344835	1.31679	0.187908	0.283614	176.06	467.37	339.09	323.84	237.14	379.18	567.91	420.31	546.55	385.12	249.83	301.28
Am_HQ_11129	P:GO:0009987	P:cellular process	K03164	TOP2; DNA topoisomerase II [EC:5.6.2.2]	A 9160 Human Diseases; B 09176 Drug resistance: antineoplastic; C 01524 Platinum drug resistance [PATH:ko01524]	190.771	0.979528	0.530866	1.84515	0.0650157	0.107571	190.771	0.524521	0.529693	0.990237	0.322058	0.415485	190.771	0.617584	0.52984	1.1656	0.243775	0.351261	111.82	281.72	274.26	67.53	165.62	216.8	142.14	187.95	283.16	87.47	215.04	273.72
Am_HQ_47022	P:GO:0006855; F:GO:0015297; C:GO:0016021; F:GO:0042910	P:xenobiotic transmembrane transport; F:antiporter activity; C:integral component of membrane; F:xenobiotic transmembrane transporter activity	K03327	TC.MATE, SLC47A, norM, mdtK, dinF; multidrug resistance protein, MATE family	None	1181.17	9.19059	1.31068	7.01209	2.3478e-12	2.21716e-11	1181.17	8.6966	1.30202	6.67931	2.40077e-11	2.36629e-10	1181.17	8.10899	1.29433	6.26498	3.72862e-10	4.73263e-09	2629.87	1469.6	7185.11	0	12	15.27	23.91	0	10.07	26.62	2.49	27.48
Am_HQ_44582	F:GO:0003677; F:GO:0003700; C:GO:0005634; C:GO:0005667; P:GO:0006355; P:GO:0006355	F:DNA binding; F:DNA-binding transcription factor activity; C:nucleus; C:transcription regulator complex; P:regulation of transcription, DNA-templated; P:regulation of transcription, DNA-templated	K09284	AP2; AP2-like factor, euAP2 lineage	None	83.6116	-1.73284	2.56035	-0.6768	0.498533	0.59533	83.6116	7.59563	2.81728	2.69608	0.00701601	0.0148734	83.6116	-2.53198	2.55986	-0.98911	0.322609	0.439331	56.06	20.22	0	121.62	0	254.03	0	0	0	134.19	0	509.06
Am_HQ_86436	P:GO:0005982; P:GO:0005985; F:GO:0030599; F:GO:0046910	P:starch metabolic process; P:sucrose metabolic process; F:pectinesterase activity; F:pectinesterase inhibitor activity	.	.	.	582.057	-5.78046	1.80665	-3.19955	0.00137641	0.00345854	582.057	-13.3188	1.7924	-7.43072	1.08008e-13	1.46158e-12	582.057	-1.42427	2.06323	-0.69031	0.489999	0.606951	0	0	0	1	36	2	5132	975	683	1	0	1
Am_HQ_25039	.	.	.	.	.	85.9825	8.47892	2.10483	4.02832	5.61767e-05	0.000187239	85.9825	8.55442	2.11485	4.04493	5.23385e-05	0.000180771	85.9825	8.10362	2.06683	3.92079	8.82583e-05	0.000357008	641.86	122.89	1.24	0	2.52	0	0	2.96	0	1.52	2.17	0
Am_HQ_67989	.	.	.	.	.	43.9809	7.05377	1.45225	4.85715	1.19089e-06	5.27382e-06	43.9809	4.13797	1.28902	3.21017	0.00132655	0.00333988	43.9809	8.06646	1.62046	4.9779	6.42792e-07	4.31876e-06	29	8	362.54	1	2	1	6	11	14	0	2	0
Am_HQ_39451	C:GO:0016021	C:integral component of membrane	.	.	.	574.661	-5.79296	4.19277	-1.38166	0.167078	0.240386	574.661	-13.3004	4.1867	-3.17682	0.00148897	0.00370759	574.661	0	4.34922	0	1	1	0	0	0	0	39	0	5044	940	729	0	0	0
Am_HQ_11149	P:GO:0000390; F:GO:0003676; C:GO:0071008	P:spliceosomal complex disassembly; F:nucleic acid binding; C:U2-type post-mRNA release spliceosomal complex	K13103	TFIP11; tuftelin-interacting protein 11	None	194.925	-0.441234	0.377498	-1.16884	0.242469	0.329019	194.925	-0.191074	0.37829	-0.505099	0.613489	0.700144	194.925	-0.487838	0.377334	-1.29285	0.196062	0.293833	141.98	164	82.14	177.26	238	295	100.44	254.31	250	195.09	261	276.81
Am_HQ_30101	P:GO:0006855; F:GO:0015297; C:GO:0016021; F:GO:0042910	P:xenobiotic transmembrane transport; F:antiporter activity; C:integral component of membrane; F:xenobiotic transmembrane transporter activity	K03327	TC.MATE, SLC47A, norM, mdtK, dinF; multidrug resistance protein, MATE family	None	105.172	7.74035	1.61025	4.80693	1.53263e-06	6.68933e-06	105.172	7.34565	1.58624	4.63087	3.6413e-06	1.56001e-05	105.172	8.06264	1.63456	4.9326	8.11414e-07	5.33015e-06	302.05	246.55	452.46	5.85	0	0	3.12	4.85	0	4.93	0	0
Am_HQ_73340	P:GO:0005986; P:GO:0006000; P:GO:0006002; P:GO:0006013; P:GO:0006094; P:GO:0006096; P:GO:0006098; P:GO:0009409; C:GO:0009570; P:GO:0009773; C:GO:0010319; P:GO:0015976; P:GO:0016311; P:GO:0030388; F:GO:0042132; C:GO:0048046	P:sucrose biosynthetic process; P:fructose metabolic process; P:fructose 6-phosphate metabolic process; P:mannose metabolic process; P:gluconeogenesis; P:glycolytic process; P:pentose-phosphate shunt; P:response to cold; C:chloroplast stroma; P:photosynthetic electron transport in photosystem I; C:stromule; P:carbon utilization; P:dephosphorylation; P:fructose 1,6-bisphosphate metabolic process; …	K03841	FBP, fbp; fructose-1,6-bisphosphatase I [EC:3.1.3.11]	A 9100 Metabolism; B 09101 Carbohydrate metabolism; C 00010 Glycolysis / Gluconeogenesis [PATH:ko00010]|A 9100 Metabolism; B 09101 Carbohydrate metabolism; C 00030 Pentose phosphate pathway [PATH:ko00030]|A 9100 Metabolism; B 09101 Carbohydrate metabolism; C 00051 Fructose and mannose metabolism [PATH:ko00051]|A 9100 Metabolism; B 09102 Energy metabolism; C 00710 Carbon fixation in photosynthetic…	1060.53	-13.7784	1.22532	-11.2447	2.45861e-29	1.09097e-27	1060.53	-11.5294	1.22564	-9.40687	5.11111e-21	1.71911e-19	1060.53	-10.7455	1.22591	-8.76537	1.86168e-18	7.71845e-17	0	0	0	4250	2475	3604	551	708	936	480	274	525
Am_HQ_64002	F:GO:0003676	F:nucleic acid binding	.	.	.	41.9614	7.07081	1.13266	6.24263	4.30277e-10	3.0781e-09	41.9614	5.91993	0.997921	5.93226	2.988e-09	2.13271e-08	41.9614	8.05906	1.33897	6.01885	1.7566e-09	1.97242e-08	37	121	249	1	1	2	1	3	5	0	2	0
Am_HQ_11161	.	.	.	.	.	1216.31	-5.76307	1.03022	-5.59403	NA	NA	1216.31	-3.37216	1.03057	-3.27213	NA	NA	1216.31	-1.99232	1.03124	-1.93195	NA	NA	45.22	27.39	96.38	10683.2	361.24	638.13	823.18	855.46	622.71	503.84	143.58	258.78
Am_HQ_11170	.	.	.	.	.	111.66	-0.122996	0.561455	-0.219066	0.826598	0.874607	111.66	-0.304835	0.560825	-0.543547	0.586753	0.67588	111.66	-0.651455	0.559646	-1.16405	0.244405	0.351939	55.99	78.96	88.87	52.04	158.05	113.7	98.65	143.33	123.89	85.84	283.01	98.3
Am_HQ_60092	C:GO:0016021	C:integral component of membrane	.	.	.	565.288	-5.96703	4.19224	-1.42335	0.154634	0.225135	565.288	-13.2755	4.18686	-3.17076	0.00152042	0.00377128	565.288	0	4.34937	0	1	1	0	0	0	0	44	0	4760	1058	826	0	0	0
Am_HQ_11177	F:GO:0004806; P:GO:0016042; P:GO:0046486	F:triglyceride lipase activity; P:lipid catabolic process; P:glycerolipid metabolic process	.	.	.	155.998	-0.570695	0.594243	-0.960373	0.336867	0.432218	155.998	-1.0147	0.593313	-1.71023	0.0872239	0.136662	155.998	-0.762066	0.593761	-1.28346	0.199332	0.297786	73.52	122.07	53.38	100.15	203.5	184.64	82.94	323.75	274.77	73.24	243.47	246.99
Am_HQ_52086	P:GO:0006629; P:GO:0010345; P:GO:0035336; F:GO:0080019; F:GO:0102965	P:lipid metabolic process; P:suberin biosynthetic process; P:long-chain fatty-acyl-CoA metabolic process; F:fatty-acyl-CoA reductase (alcohol-forming) activity; F:alcohol-forming fatty acyl-CoA reductase activity	K13356	FAR; alcohol-forming fatty acyl-CoA reductase [EC:1.2.1.84]	A 9100 Metabolism; B 09103 Lipid metabolism; C 00073 Cutin, suberine and wax biosynthesis [PATH:ko00073]|A 9140 Cellular Processes; B 09141 Transport and catabolism; C 04146 Peroxisome [PATH:ko04146]|A 9150 Organismal Systems; B 09149 Aging; C 04212 Longevity regulating pathway - worm [PATH:ko04212]	758.585	-12.9806	1.40251	-9.25531	2.13618e-20	4.70172e-19	758.585	-11.8135	1.40267	-8.4222	3.69483e-17	7.76126e-16	758.585	-10.7408	1.40297	-7.65574	1.922e-14	4.81546e-13	0	0	0	1774.74	888.59	3495.29	613.01	282.15	1836.17	702.42	203.48	359.99
Am_HQ_11183	F:GO:0004843; P:GO:0016579; P:GO:0044267	F:cysteine-type deubiquitinase activity; P:protein deubiquitination; P:cellular protein metabolic process	K11855	USP36_42; ubiquitin carboxyl-terminal hydrolase 36/42 [EC:3.4.19.12]	None	217.103	0.644561	2.95429	0.218178	0.827291	0.87517	217.103	1.03941	2.95445	0.351812	0.724979	0.793492	217.103	1.34274	2.95459	0.454458	0.649499	0.748624	453.65	369.26	0	346.27	332.04	0	213.72	305.2	0	192.12	245.28	0
Am_HQ_50996	F:GO:0016757	F:glycosyltransferase activity	.	.	.	3305.47	6.34432	1.0398	6.10148	1.05093e-09	7.14349e-09	3305.47	5.53866	1.03897	5.33091	9.772e-08	5.4284e-07	3305.47	8.05153	1.04418	7.71084	1.24996e-14	3.22682e-13	25177	1142	1830	73.28	338.71	86	169.55	417.31	317.8	93	32.3	30.91
Am_HQ_11188	F:GO:0004672; F:GO:0005524; P:GO:0006468; C:GO:0016021	F:protein kinase activity; F:ATP binding; P:protein phosphorylation; C:integral component of membrane	.	.	.	160.657	0.342322	0.737999	0.463851	0.642754	0.724562	160.657	0.849128	0.739113	1.14885	0.250619	0.337405	160.657	0.647506	0.738569	0.876704	0.380648	0.499869	253	225.05	39.99	200	248	89	105	185.11	96	168	213.95	64.01
Am_HQ_89950	C:GO:0016020	C:membrane	.	.	.	981.952	-10.0963	2.52568	-3.99747	6.40235e-05	0.000210911	981.952	-13.1441	2.52541	-5.20474	1.94267e-07	1.02775e-06	981.952	-0.619	2.72879	-0.22684	0.820548	0.880388	0	1	0	1	1312	2	4583	3803	2614	0	0	2
Am_HQ_11192	.	.	K24139	PILS, ECM3; auxin efflux carrier family protein	None	123.842	-0.356432	0.333751	-1.06796	0.285539	0.377112	123.842	0.22812	0.336943	0.677028	0.498389	0.59301	123.842	0.0273482	0.335565	0.081499	0.935045	0.962473	106.8	129.9	57.12	166.41	151.1	184.86	114.47	124.62	88.73	129.33	124.02	133.88
Am_HQ_57202	P:GO:0009821; C:GO:0016021; F:GO:0050328; F:GO:0071949	P:alkaloid biosynthetic process; C:integral component of membrane; F:tetrahydroberberine oxidase activity; F:FAD binding	.	.	.	205.576	8.58749	1.55262	5.53096	3.18474e-08	1.77494e-07	205.576	1.60813	1.41903	1.13326	0.257106	0.34492	205.576	7.99772	1.50796	5.30367	1.13497e-07	8.9862e-07	3	96	1417	3	2	0	155	70	451	2	1	5
Am_HQ_47857	F:GO:0046872; F:GO:0051213	F:metal ion binding; F:dioxygenase activity	.	.	.	90.6529	-4.85338	3.83833	-1.26445	0.206068	0.287082	90.6529	-3.72378	3.85375	-0.966274	0.333907	0.427998	90.6529	-10.6056	3.82577	-2.77215	0.00556874	0.014059	0	0	0	20.1	0	0	0	10.46	0	336.8	797.16	3.05
Am_HQ_11208	.	.	K04683	TFDP1; transcription factor Dp-1	A 9130 Environmental Information Processing; B 09132 Signal transduction; C 04350 TGF-beta signaling pathway [PATH:ko04350]|A 9140 Cellular Processes; B 09143 Cell growth and death; C 04110 Cell cycle [PATH:ko04110]	158.338	-1.61699	0.404711	-3.99542	6.45786e-05	0.000212392	158.338	-0.598444	0.407736	-1.46772	0.142179	0.208679	158.338	-0.61174	0.407565	-1.50096	0.133365	0.214366	88.17	89.36	39.24	382.58	248.99	244.56	124.68	127.53	186.46	130.53	183.58	129.96
Am_HQ_87397	P:GO:0009416; C:GO:0009522; C:GO:0009523; C:GO:0009535; P:GO:0009768; C:GO:0016021; F:GO:0016168; P:GO:0018298	P:response to light stimulus; C:photosystem I; C:photosystem II; C:chloroplast thylakoid membrane; P:photosynthesis, light harvesting in photosystem I; C:integral component of membrane; F:chlorophyll binding; P:protein-chromophore linkage	K08907	LHCA1; light-harvesting complex I chlorophyll a/b binding protein 1	A 9100 Metabolism; B 09102 Energy metabolism; C 00196 Photosynthesis - antenna proteins [PATH:ko00196]	2998.5	-11.5693	0.785112	-14.7359	3.79219e-49	5.62414e-47	2998.5	-11.4453	0.785121	-14.5777	3.89394e-48	1.14731e-45	2998.5	-10.598	0.78519	-13.4973	1.62143e-41	4.97642e-39	0	3	1	3003	5979	7364	4803	4726	5035	2692	2815	2747
Am_HQ_1122	.	.	K15188	CCNT; cyclin T	A 9160 Human Diseases; B 09161 Cancer: overview; C 05202 Transcriptional misregulation in cancer [PATH:ko05202]	205.493	0.25349	0.474951	0.533717	0.593537	0.68247	205.493	0.081562	0.474573	0.171864	0.863544	0.901569	205.493	0.0669413	0.474473	0.141086	0.887802	0.928445	253.68	164.26	105.22	163.85	231.81	202.68	97.03	276.37	323.7	248.31	256.31	181.33
Am_HQ_69332	C:GO:0005737; P:GO:0005986; P:GO:0006000; P:GO:0006002; P:GO:0006013; P:GO:0006094; P:GO:0006096; P:GO:0006098; P:GO:0015976; P:GO:0016311; P:GO:0030388; F:GO:0042132; F:GO:0050278	C:cytoplasm; P:sucrose biosynthetic process; P:fructose metabolic process; P:fructose 6-phosphate metabolic process; P:mannose metabolic process; P:gluconeogenesis; P:glycolytic process; P:pentose-phosphate shunt; P:carbon utilization; P:dephosphorylation; P:fructose 1,6-bisphosphate metabolic process; F:fructose 1,6-bisphosphate 1-phosphatase activity; F:sedoheptulose-bisphosphatase activity	K01100	E3.1.3.37; sedoheptulose-bisphosphatase [EC:3.1.3.37]	A 9100 Metabolism; B 09102 Energy metabolism; C 00710 Carbon fixation in photosynthetic organisms [PATH:ko00710]	2585.52	-14.1963	1.2084	-11.748	7.22769e-32	3.8028e-30	2585.52	-11.6139	1.20856	-9.60971	7.2754e-22	2.62699e-20	2585.52	-10.5782	1.20876	-8.75135	2.10823e-18	8.69173e-17	1	0	0	10719	6536	9670	1277	1405	1817	785	555	877
Am_HQ_64609	F:GO:0004650; C:GO:0005576; P:GO:0005982; P:GO:0005985; P:GO:0071555	F:polygalacturonase activity; C:extracellular region; P:starch metabolic process; P:sucrose metabolic process; P:cell wall organization	K01213	E3.2.1.67; galacturan 1,4-alpha-galacturonidase [EC:3.2.1.67]	A 9100 Metabolism; B 09101 Carbohydrate metabolism; C 00040 Pentose and glucuronate interconversions [PATH:ko00040]	500.863	-4.59442	3.94413	-1.16488	0.244069	0.330764	500.863	-13.1061	3.92927	-3.33551	0.000851426	0.00223906	500.863	0	4.10199	0	1	1	0	0	0	0	17	0	4397	810	664	0	0	0
Am_HQ_89224	.	.	.	.	.	496.623	-6.41458	4.25094	-1.50898	0.131304	0.196211	496.623	-13.0836	4.24707	-3.08063	0.00206566	0.00497189	496.623	0	4.40736	0	1	1	0	0	0	0	60	0	4299	866	619	0	0	0
Am_HQ_87973	P:GO:0006118; P:GO:0006119; F:GO:0008121; F:GO:0009496; C:GO:0009535; P:GO:0022900; F:GO:0045158; C:GO:0045275; F:GO:0046872; F:GO:0051537; P:GO:1902600	P:obsolete electron transport; P:oxidative phosphorylation; F:ubiquinol-cytochrome-c reductase activity; F:plastoquinol--plastocyanin reductase activity; C:chloroplast thylakoid membrane; P:electron transport chain; F:electron transporter, transferring electrons within cytochrome b6/f complex of photosystem II activity; C:respiratory chain complex III; F:metal ion binding; F:2 iron, 2 sulfur clus…	K02636	petC; cytochrome b6-f complex iron-sulfur subunit [EC:7.1.1.6]	A 9100 Metabolism; B 09102 Energy metabolism; C 00195 Photosynthesis [PATH:ko00195]	852.621	-13.2094	1.31254	-10.064	7.97253e-24	2.42001e-22	852.621	-12.0236	1.31269	-9.15952	5.2131e-20	1.55046e-18	852.621	-10.4683	1.31318	-7.97173	1.56473e-15	4.5677e-14	0	0	0	2601.77	1662.82	2747.53	1666.92	613.35	590.75	504.61	296.94	242.62
Am_HQ_90103	F:GO:0005504; P:GO:0009627	F:fatty acid binding; P:systemic acquired resistance	.	.	.	962.619	9.93594	1.18505	8.38444	5.09696e-17	8.02799e-16	962.619	7.36601	1.09195	6.74576	1.52223e-11	1.55302e-10	962.619	0.836807	1.07205	0.780568	0.435057	0.554178	3015.56	2680.48	206.02	0	6.65	1.12	8	29.05	12.27	3225.56	750.69	464.61
Am_HQ_86941	C:GO:0009522; C:GO:0009523; C:GO:0009535; P:GO:0009765; C:GO:0016021; F:GO:0016168; P:GO:0018298; F:GO:0046872	C:photosystem I; C:photosystem II; C:chloroplast thylakoid membrane; P:photosynthesis, light harvesting; C:integral component of membrane; F:chlorophyll binding; P:protein-chromophore linkage; F:metal ion binding	K08910	LHCA4; light-harvesting complex I chlorophyll a/b binding protein 4	A 9100 Metabolism; B 09102 Energy metabolism; C 00196 Photosynthesis - antenna proteins [PATH:ko00196]	5192.39	-11.6435	0.528395	-22.0356	1.31191e-107	2.23004e-104	5192.39	-10.7841	0.528443	-20.4072	1.44204e-92	3.5407e-89	5192.39	-10.4594	0.528467	-19.792	3.48814e-87	1.28468e-83	0	8	0	9562.78	10888.6	13739	5255.74	6344.24	7075.86	5257.55	4537.03	5252.5
Am_HQ_11239	F:GO:0003676	F:nucleic acid binding	K09191	GTF3A; general transcription factor IIIA	None	364.778	0.981063	1.53093	0.640827	0.521635	0.617247	364.778	2.14546	1.53164	1.40075	0.161288	0.232244	364.778	1.97569	1.53148	1.29005	0.197032	0.295088	1248.83	11.94	381.1	739.13	5.96	463.65	260.99	12.13	248.21	385.22	12.3	213.6
Am_HQ_37243	C:GO:0016021	C:integral component of membrane	.	.	.	480.127	-5.55188	4.12972	-1.34437	0.178828	0.254571	480.127	-13.041	4.12244	-3.16343	0.00155922	0.00385971	480.127	0	4.28738	0	1	1	0	0	0	0	33	0	4146	818	661	0	0	0
Am_HQ_86126	.	.	.	.	.	1182.48	14.76	1.41508	10.4305	1.79985e-25	6.13781e-24	1182.48	12.3452	1.15161	10.72	8.20424e-27	4.82174e-25	1182.48	7.91667	0.804667	9.83845	7.68882e-23	5.33006e-21	3399	6828	1549	0	0	0	0	1	2	36	22	5
Am_HQ_11251	.	.	.	.	.	159.266	0.564311	0.367906	1.53385	0.125067	0.188381	159.266	0.21523	0.366571	0.587143	0.557107	0.648662	159.266	0.643212	0.368198	1.74692	0.0806514	0.140234	179.66	127.94	172.63	80.5	166.09	202.43	198	192.65	159.32	139.43	146.81	133.97
Am_HQ_61921	F:GO:0016747	F:acyltransferase activity, transferring groups other than amino-acyl groups	.	.	.	36.493	8.77072	2.26511	3.8721	0.000107903	0.000340198	36.493	7.73039	2.1665	3.56815	0.000359516	0.00103486	36.493	7.86579	2.18386	3.60178	0.000316048	0.0011177	14	368	6	0	0	1	2	0	0	2	0	0
Am_HQ_89837	P:GO:0006952	P:defense response	.	.	.	1903.77	-8.01339	2.98129	-2.68789	0.00719042	0.0153461	1903.77	-13.0024	2.98084	-4.36199	1.28884e-05	5.01775e-05	1903.77	-2.05642	3.00918	-0.683381	0.494366	0.610922	2	0	0	2	719	0	7209.24	6649	10092	12	0	0
Am_HQ_11276	C:GO:0016021	C:integral component of membrane	K16750	BLOC1S2; biogenesis of lysosome-related organelles complex 1 subunit 2	None	164.166	-0.176038	0.361191	-0.487383	0.625987	0.710554	164.166	-0.652167	0.359571	-1.81373	0.0697186	0.112727	164.166	-0.289868	0.360687	-0.803656	0.421596	0.540689	140	109	71	150	165	175	265	199	199	191	195	146
Am_HQ_52792	F:GO:0004564; P:GO:0005982; P:GO:0005985; P:GO:0006012	F:beta-fructofuranosidase activity; P:starch metabolic process; P:sucrose metabolic process; P:galactose metabolic process	K01193	INV, sacA; beta-fructofuranosidase [EC:3.2.1.26]	A 9100 Metabolism; B 09101 Carbohydrate metabolism; C 00052 Galactose metabolism [PATH:ko00052]|A 9100 Metabolism; B 09101 Carbohydrate metabolism; C 00500 Starch and sucrose metabolism [PATH:ko00500]	462.648	-3.66296	1.76301	-2.07768	0.0377393	0.0668025	462.648	-12.9933	1.69856	-7.64959	2.01624e-14	3.01862e-13	462.648	-0.533684	2.06696	-0.258198	0.796254	0.862638	0	0	0	0	9	0	2085	1891	1926	1	0	0
Am_HQ_77878	C:GO:0005576; P:GO:0006949; C:GO:0009506; P:GO:0019953	C:extracellular region; P:syncytium formation; C:plasmodesma; P:sexual reproduction	K20628	exlX; expansin	None	161.309	-8.55986	1.40572	-6.08932	1.13389e-09	7.66963e-09	161.309	-10.0846	1.40398	-7.18283	6.82836e-13	8.32284e-12	161.309	-10.4353	1.40376	-7.43383	1.05498e-13	2.362e-12	0	0	0	44	190	36	167	333	311	153	440	441
Am_HQ_11287	C:GO:0016020	C:membrane	.	.	.	356	0.0920781	0.530255	0.173649	0.862142	0.901552	356	-0.15461	0.529974	-0.291732	0.770492	0.830391	356	-0.176795	0.529916	-0.333628	0.73866	0.819053	153.73	334.84	357.67	196.8	379.37	481.67	192.4	414.37	668.95	191.38	554.8	522.03
Am_HQ_11289	F:GO:0004497; F:GO:0005506; C:GO:0016021; F:GO:0016705; F:GO:0020037	F:monooxygenase activity; F:iron ion binding; C:integral component of membrane; F:oxidoreductase activity, acting on paired donors, with incorporation or reduction of molecular oxygen; F:heme binding	.	.	.	114.681	0.693523	1.35282	0.512648	0.608198	0.695146	114.681	2.98075	1.35898	2.19337	0.0282804	0.0512709	114.681	2.9351	1.35859	2.1604	0.0307415	0.0618041	277.79	306.08	10.49	309.51	147.67	6.61	16.31	76.51	7.87	60.51	37.66	3.98
Am_HQ_84358	F:GO:0000977; F:GO:0003700; C:GO:0005634; C:GO:0005667; P:GO:0006355; P:GO:0045944; F:GO:0046983	F:RNA polymerase II transcription regulatory region sequence-specific DNA binding; F:DNA-binding transcription factor activity; C:nucleus; C:transcription regulator complex; P:regulation of transcription, DNA-templated; P:positive regulation of transcription by RNA polymerase II; F:protein dimerization activity	K09264	K09264; MADS-box transcription factor, plant	None	106.956	7.09426	0.682192	10.3992	2.49979e-25	8.4208e-24	106.956	7.84388	0.780348	10.0518	9.02314e-24	4.02003e-22	106.956	7.84851	0.778067	10.0872	6.29439e-24	4.77984e-22	379	312.96	321.92	4	3	3	0	5	1	3	0	3
Am_HQ_77438	C:GO:0005886; C:GO:0016021; F:GO:0022857; P:GO:0055085	C:plasma membrane; C:integral component of membrane; F:transmembrane transporter activity; P:transmembrane transport	.	.	.	139.331	7.36721	0.810203	9.09305	9.62989e-20	1.98324e-18	139.331	6.89938	0.777255	8.87659	6.89385e-19	1.79013e-17	139.331	7.81816	0.851575	9.18083	4.278e-20	2.16328e-18	604	322	369	0	5	6	4	3	8	3	0	5
Am_HQ_11307	F:GO:0003723; F:GO:0004386; F:GO:0005524; C:GO:0005730; F:GO:0016787	F:RNA binding; F:helicase activity; F:ATP binding; C:nucleolus; F:hydrolase activity	K13181	DDX27, DRS1; ATP-dependent RNA helicase DDX27 [EC:3.6.4.13]	None	335.646	0.425434	0.369341	1.15187	0.249374	0.336879	335.646	0.512141	0.369538	1.38589	0.165779	0.237821	335.646	0.580196	0.369616	1.56973	0.116479	0.191843	371.31	452.13	230.37	277.62	438.47	321.82	329.92	365.95	269.41	223.85	422.96	296.95
Am_HQ_1131	F:GO:0003678; F:GO:0005524; C:GO:0005634; C:GO:0005657; P:GO:0006283; F:GO:0016787; P:GO:0032508	F:DNA helicase activity; F:ATP binding; C:nucleus; C:replication fork; P:transcription-coupled nucleotide-excision repair; F:hydrolase activity; P:DNA duplex unwinding	K10841	ERCC6, CSB, RAD26; DNA excision repair protein ERCC-6	A 9120 Genetic Information Processing; B 09124 Replication and repair; C 03420 Nucleotide excision repair [PATH:ko03420]	500.661	-0.161207	0.34682	-0.464816	0.642063	0.723967	500.661	0.00638455	0.347062	0.018396	0.985323	0.990162	500.661	-0.318195	0.346617	-0.918002	0.358618	0.477221	493	344	260	555	529	585	285	601	629	486	701	693
Am_HQ_36813	F:GO:0003993; P:GO:0006771; P:GO:0016311; P:GO:0019497; F:GO:0046872	F:acid phosphatase activity; P:riboflavin metabolic process; P:dephosphorylation; P:hexachlorocyclohexane metabolic process; F:metal ion binding	K22390	ACP7; acid phosphatase type 7	None	684.792	-11.8456	1.20203	-9.85468	6.54271e-23	1.805e-21	684.792	-12.7806	1.20188	-10.6338	2.07498e-26	1.17271e-24	684.792	-10.4224	1.20256	-8.66686	4.44197e-18	1.78146e-16	0	0	0	722.75	1059.34	928.01	1684.72	1853	1572.06	305	312	405
Am_HQ_11325	P:GO:0009451; F:GO:0016853	P:RNA modification; F:isomerase activity	.	.	.	255.512	0.133033	0.205572	0.647138	0.517542	0.613488	255.512	0.227113	0.206067	1.10213	0.270405	0.359834	255.512	-0.0744581	0.204658	-0.363817	0.715995	0.801766	182	256	219	242	259	295	197	310	235	341	317	263
Am_HQ_11332	.	.	.	.	.	67.3012	0.325059	0.92498	0.351422	NA	NA	67.3012	0.682708	0.928218	0.735504	NA	NA	67.3012	-2.14004	0.915883	-2.33659	NA	NA	30.67	24.5	40.12	28.13	47.23	26.26	16.94	29.69	34.35	44.38	483.57	34.28
Am_HQ_11338	.	.	.	.	.	312.365	-0.768674	0.201669	-3.81156	0.000138093	0.000427691	312.365	0.137329	0.204939	0.670095	0.502797	0.597356	312.365	-0.417913	0.202637	-2.06238	0.039172	0.0758336	207.99	216.62	189.32	490.14	373.21	541.94	187.97	268	294.24	330.88	333.29	444.79
Am_HQ_85938	C:GO:0009535; C:GO:0016021	C:chloroplast thylakoid membrane; C:integral component of membrane	K03542	psbS; photosystem II 22kDa protein	A 9100 Metabolism; B 09102 Energy metabolism; C 00195 Photosynthesis [PATH:ko00195]	1934.2	-14.5017	1.24807	-11.6193	3.2885e-31	1.63302e-29	1934.2	-13.2257	1.24814	-10.5963	3.10023e-26	1.73002e-24	1934.2	-10.4224	1.24884	-8.3457	7.07936e-17	2.46362e-15	0	0	0	6379.01	3865.91	6965.16	1993.18	2312.49	2749.68	356.31	163.74	506.7
Am_HQ_58687	P:GO:0006855; F:GO:0015297; C:GO:0016021; F:GO:0042910	P:xenobiotic transmembrane transport; F:antiporter activity; C:integral component of membrane; F:xenobiotic transmembrane transporter activity	K03327	TC.MATE, SLC47A, norM, mdtK, dinF; multidrug resistance protein, MATE family	None	509.485	8.40547	0.586578	14.3297	1.42804e-46	1.8347e-44	509.485	5.69982	0.501676	11.3615	6.49846e-30	5.12868e-28	509.485	7.80383	0.553362	14.1026	3.66146e-45	1.37137e-42	707.41	2319.11	1971.88	6.57	6	6	22	45	60	16	6.02	7
Am_HQ_11351	C:GO:0005794; C:GO:0016021; F:GO:0016757	C:Golgi apparatus; C:integral component of membrane; F:glycosyltransferase activity	.	.	.	363.272	2.44438	0.800407	3.05392	0.00225874	0.00541187	363.272	0.162274	0.797244	0.203543	0.838711	0.883024	363.272	0.797776	0.797678	1.00012	0.317251	0.43361	48.44	737.24	621.98	69.15	130.8	129.83	363.24	615.02	631.38	636.23	115.79	274.91
Am_HQ_11352	C:GO:0016021; F:GO:0016757	C:integral component of membrane; F:glycosyltransferase activity	K20781	SGT1; peptidyl serine alpha-galactosyltransferase [EC:2.4.1.-]	A 9100 Metabolism; B 09107 Glycan biosynthesis and metabolism; C 00514 Other types of O-glycan biosynthesis [PATH:ko00514]	205.34	-0.246601	0.430936	-0.572245	0.567156	0.658627	205.34	-0.150149	0.43121	-0.348204	0.727687	0.795825	205.34	-0.256417	0.430877	-0.595104	0.551774	0.663137	81.04	211.35	166.21	168.94	259.12	283.76	106.9	268.44	302.64	153.55	280.61	283.66
Am_HQ_84163	.	.	.	.	.	398.93	-0.655929	0.740442	-0.885862	0.375692	0.473051	398.93	7.27493	0.902806	8.05813	7.74728e-16	1.39413e-14	398.93	-0.761949	0.740383	-1.02913	0.303419	0.418431	543	290	41	610	598	708	1	2	5	622	532	931
Am_HQ_11365	.	.	.	.	.	220.331	-0.889098	1.53597	-0.57885	0.562691	0.65468	220.331	-0.0961437	1.53651	-0.0625729	0.950107	0.964554	220.331	-0.705451	1.53606	-0.45926	0.646048	0.745877	198	174	9	597	300	6	169	361	5	401	423	9
Am_HQ_11369	F:GO:0003678; F:GO:0005524; C:GO:0005657; F:GO:0016787; P:GO:0032508	F:DNA helicase activity; F:ATP binding; C:replication fork; F:hydrolase activity; P:DNA duplex unwinding	K15083	RAD16; DNA repair protein RAD16	None	281.451	-0.0669425	0.25115	-0.266543	0.789821	0.846598	281.451	0.450124	0.253193	1.77779	0.0754382	0.120607	281.451	-0.563293	0.249771	-2.25523	0.0241186	0.0501669	181	314	160	283	284	337	178	196	256	352	409	525
Am_HQ_1137	F:GO:0005509; C:GO:0005634; C:GO:0005667; F:GO:0030374; P:GO:0045893	F:calcium ion binding; C:nucleus; C:transcription regulator complex; F:nuclear receptor coactivator activity; P:positive regulation of transcription, DNA-templated	.	.	.	2315.79	-0.319997	0.254573	-1.25699	0.208756	0.290204	2315.79	0.206375	0.254776	0.810027	0.417925	0.514015	2315.79	0.0581037	0.2547	0.228126	0.819549	0.8797	1438.4	1546.69	2548.91	3280.95	2823.7	3092.31	1749.97	2279.8	2377.13	1971.23	2254.2	2958.6
Am_HQ_58316	F:GO:0003677; P:GO:0007165; F:GO:0043531	F:DNA binding; P:signal transduction; F:ADP binding	.	.	.	51.2391	-0.780539	2.18061	-0.357945	0.720385	0.790146	51.2391	7.25172	2.47554	2.92935	0.00339669	0.0077726	51.2391	-2.36231	2.17841	-1.08442	0.278178	0.390001	47.03	0	11.11	119.23	0	21.27	0	0	0	368.32	9.97	55.13
Am_HQ_11374	F:GO:0004672; F:GO:0005524; P:GO:0006468; C:GO:0016021	F:protein kinase activity; F:ATP binding; P:protein phosphorylation; C:integral component of membrane	K00924	E2.7.1.-; kinase [EC:2.7.1.-]	None	481.352	-0.0987127	0.406245	-0.242988	0.808015	0.860672	481.352	0.0190338	0.406395	0.0468356	0.962644	0.974489	481.352	-0.0239987	0.406311	-0.0590649	0.9529	0.974329	606	259	242	561	476	612	446	591	467	564	473	537
Am_HQ_56803	F:GO:0008318; P:GO:0018342; P:GO:0018342	F:protein prenyltransferase activity; P:protein prenylation; P:protein prenylation	K05955	FNTA; protein farnesyltransferase/geranylgeranyltransferase type-1 subunit alpha [EC:2.5.1.58 2.5.1.59]	A 9100 Metabolism; B 09109 Metabolism of terpenoids and polyketides; C 00900 Terpenoid backbone biosynthesis [PATH:ko00900]	240.919	-10.964	1.20781	-9.07764	1.10949e-19	2.27015e-18	240.919	-9.79216	1.20856	-8.10237	5.38992e-16	9.90902e-15	240.919	-10.4178	1.20807	-8.62354	6.49162e-18	2.54347e-16	0	0	0	389.41	565.85	517.91	217	207.81	220.49	391.2	344.49	276.96
Am_HQ_55667	F:GO:0004439; F:GO:0034485; P:GO:0046856	F:phosphatidylinositol-4,5-bisphosphate 5-phosphatase activity; F:phosphatidylinositol-3,4,5-trisphosphate 5-phosphatase activity; P:phosphatidylinositol dephosphorylation	.	.	.	428.692	-12.1341	1.23591	-9.81797	9.4218e-23	2.54838e-21	428.692	-10.7531	1.23633	-8.6976	3.38964e-18	8.17732e-17	428.692	-10.397	1.2365	-8.40842	4.15577e-17	1.48359e-15	0	0	0	1140.07	855.02	1340.18	265.89	508.32	515.51	456.9	321.61	214.83
Am_HQ_59263	C:GO:0016021	C:integral component of membrane	.	.	.	211.849	6.99797	1.49919	4.66782	3.04408e-06	1.26777e-05	211.849	6.02908	1.48305	4.06532	4.7966e-05	0.000166843	211.849	7.79193	1.52278	5.11693	3.10557e-07	2.22597e-06	1292	592	31	6	14	0	12	27	1	5	7	0
Am_HQ_42939	.	.	.	.	.	36.6392	5.23026	0.981309	5.32988	9.82775e-08	5.06823e-07	36.6392	3.86359	0.923742	4.18255	2.88263e-05	0.000105012	36.6392	7.7755	1.35113	5.75482	8.67325e-09	8.52966e-08	54.2	136.47	143.08	1.16	2.56	8.23	1.21	17.63	12.3	1.19	0	1.3
Am_HQ_11398	F:GO:0005524; C:GO:0016021; F:GO:0016887; F:GO:0042626; P:GO:0055085	F:ATP binding; C:integral component of membrane; F:ATP hydrolysis activity; F:ATPase-coupled transmembrane transporter activity; P:transmembrane transport	K05658	ABCB1, CD243; ATP-binding cassette, subfamily B (MDR/TAP), member 1 [EC:7.6.2.2]	A 9130 Environmental Information Processing; B 09131 Membrane transport; C 02010 ABC transporters [PATH:ko02010]|A 9150 Organismal Systems; B 09154 Digestive system; C 04976 Bile secretion [PATH:ko04976]|A 9160 Human Diseases; B 09161 Cancer: overview; C 05206 MicroRNAs in cancer [PATH:ko05206]|A 9160 Human Diseases; B 09162 Cancer: specific types; C 05226 Gastric cancer [PATH:ko05226]	145.768	0.603742	0.52337	1.15357	0.248678	0.336124	145.768	0.430905	0.522851	0.824145	0.409857	0.505838	145.768	0.461869	0.522855	0.883359	0.377042	0.496388	233.72	102.94	101.42	122.43	95	188.81	87.08	111.58	263.95	126.09	128.44	191.51
Am_HQ_11399	F:GO:0008270; F:GO:0016874	F:zinc ion binding; F:ligase activity	K10144	RCHY1, PIRH2; RING finger and CHY zinc finger domain-containing protein 1 [EC:2.3.2.27]	A 9120 Genetic Information Processing; B 09123 Folding, sorting and degradation; C 04120 Ubiquitin mediated proteolysis [PATH:ko04120]|A 9140 Cellular Processes; B 09143 Cell growth and death; C 04115 p53 signaling pathway [PATH:ko04115]|A 9160 Human Diseases; B 09172 Infectious disease: viral; C 05162 Measles [PATH:ko05162]	5311.63	0.64582	1.05556	0.611826	0.540653	0.634586	5311.63	1.1117	1.05559	1.05316	0.292269	0.383662	5311.63	0.350068	1.05555	0.331645	0.740157	0.820548	1120.99	6792.52	10625.3	2088.54	5550.68	8098.09	148.84	5748.67	5858.32	1078.84	10060.3	7894.82
Am_HQ_78029	F:GO:0004806; P:GO:0016042; P:GO:0046486	F:triglyceride lipase activity; P:lipid catabolic process; P:glycerolipid metabolic process	.	.	.	896.223	-13.0675	1.30656	-10.0014	1.50195e-23	4.45505e-22	896.223	-12.5408	1.30662	-9.59786	8.16249e-22	2.9377e-20	896.223	-10.3227	1.30727	-7.89634	2.87218e-15	8.00372e-14	0	0	0	1300	2025	3144	642	1754	2137	531	234	177
Am_HQ_11400	F:GO:0003729; C:GO:0005634; P:GO:0006397; C:GO:1990904	F:mRNA binding; C:nucleus; P:mRNA processing; C:ribonucleoprotein complex	K12741	HNRNPA1_3; heterogeneous nuclear ribonucleoprotein A1/A3	A 9120 Genetic Information Processing; B 09121 Transcription; C 03040 Spliceosome [PATH:ko03040]|A 9160 Human Diseases; B 09164 Neurodegenerative disease; C 05014 Amyotrophic lateral sclerosis [PATH:ko05014]	439.188	0.582856	0.530748	1.09818	0.272126	0.362386	439.188	1.06845	0.53132	2.01093	0.0443331	0.0760616	439.188	0.907807	0.531078	1.70937	0.0873831	0.15026	931.85	268.98	315.23	431.68	481.29	513.24	396.94	283.13	309.81	385.4	475.61	279.11
Am_HQ_88211	.	.	.	.	.	244114	7.46521	0.590032	12.6522	1.0878e-36	7.75428e-35	244114	6.51608	0.589984	11.0445	2.33075e-28	1.56076e-26	244114	7.7259	0.590051	13.0936	3.58131e-39	9.09654e-37	610299	653352	1063770	2231	6933	8875	10184	7932	15906	4019	1843	9158
Am_HQ_25632	F:GO:0004693; F:GO:0005524; P:GO:0006468; F:GO:0008353; P:GO:0009069; C:GO:0016592; P:GO:0051726	F:cyclin-dependent protein serine/threonine kinase activity; F:ATP binding; P:protein phosphorylation; F:RNA polymerase II CTD heptapeptide repeat kinase activity; P:serine family amino acid metabolic process; C:mediator complex; P:regulation of cell cycle	K02208	CDK8_11; cyclin-dependent kinase 8/11 [EC:2.7.11.22 2.7.11.23]	None	66.3542	-1.08	1.55027	-0.696649	0.486023	0.583132	66.3542	0.200235	1.55241	0.128983	0.897371	0.927359	66.3542	7.66483	1.94585	3.93906	8.18023e-05	0.000334011	0.59	105.37	66.83	123.52	172.43	162.18	0	105.44	94.75	0	0.58	0
Am_HQ_79834	P:GO:0009805; P:GO:0009809; P:GO:0009811; F:GO:0016616; F:GO:0016621	P:coumarin biosynthetic process; P:lignin biosynthetic process; P:stilbene biosynthetic process; F:oxidoreductase activity, acting on the CH-OH group of donors, NAD or NADP as acceptor; F:cinnamoyl-CoA reductase activity	.	.	.	184.174	-10.902	1.91196	-5.70201	1.18401e-08	6.98644e-08	184.174	-5.86197	1.9244	-3.04612	0.00231812	0.00551825	184.174	-10.3219	1.91215	-5.39805	6.7368e-08	5.61773e-07	0	0	0	409.33	453.62	555.71	0	43.68	0	286.27	423.8	235.97
Am_HQ_42090	C:GO:0005737; F:GO:0016881	C:cytoplasm; F:acid-amino acid ligase activity	K14487	GH3; auxin responsive GH3 gene family	A 9130 Environmental Information Processing; B 09132 Signal transduction; C 04075 Plant hormone signal transduction [PATH:ko04075]	512.417	5.51037	0.99487	5.53878	3.04589e-08	1.70228e-07	512.417	3.5051	0.988865	3.54457	0.000393249	0.00112043	512.417	7.60983	1.02047	7.45717	8.84001e-14	2.01596e-12	843	349	3233	5	18	119	263	81	157	10	7	14
Am_HQ_1141	F:GO:0005384; P:GO:0009873; F:GO:0015086; C:GO:0016021; P:GO:0070574; P:GO:0071421	F:manganese ion transmembrane transporter activity; P:ethylene-activated signaling pathway; F:cadmium ion transmembrane transporter activity; C:integral component of membrane; P:cadmium ion transmembrane transport; P:manganese ion transmembrane transport	K14513	EIN2; ethylene-insensitive protein 2	A 9130 Environmental Information Processing; B 09132 Signal transduction; C 04016 MAPK signaling pathway - plant [PATH:ko04016]|A 9130 Environmental Information Processing; B 09132 Signal transduction; C 04075 Plant hormone signal transduction [PATH:ko04075]	271.773	0.281483	1.20577	0.233446	0.815415	0.865993	271.773	-2.32998	1.20364	-1.93579	0.0528937	0.0888102	271.773	-0.791199	1.20442	-0.656915	0.511236	0.62668	0	174.5	152.69	41.36	72.6	244.26	1070.73	659.47	205.91	334.44	209.81	169.53
Am_HQ_43288	P:GO:0000413; F:GO:0003723; F:GO:0003755; C:GO:0005634; F:GO:0008270; C:GO:0016021; P:GO:1901407	P:protein peptidyl-prolyl isomerization; F:RNA binding; F:peptidyl-prolyl cis-trans isomerase activity; C:nucleus; F:zinc ion binding; C:integral component of membrane; P:regulation of phosphorylation of RNA polymerase II C-terminal domain	K12735	PPIL4; peptidyl-prolyl cis-trans isomerase-like 4 [EC:5.2.1.8]	None	123.5	11.4812	2.10864	5.44483	5.18556e-08	2.79216e-07	123.5	6.3168	1.77913	3.55049	0.000384513	0.00109808	123.5	7.5122	1.81599	4.1367	3.52339e-05	0.000158059	654.65	56.29	400.29	0	0	0	0	9.64	11.4	0	0	9.4
Am_HQ_11426	F:GO:0003825; F:GO:0004805; C:GO:0005829; P:GO:0005982; P:GO:0005985; P:GO:0005992; P:GO:0016311; P:GO:0070413	F:alpha,alpha-trehalose-phosphate synthase (UDP-forming) activity; F:trehalose-phosphatase activity; C:cytosol; P:starch metabolic process; P:sucrose metabolic process; P:trehalose biosynthetic process; P:dephosphorylation; P:trehalose metabolism in response to stress	K16055	TPS; trehalose 6-phosphate synthase/phosphatase [EC:2.4.1.15 3.1.3.12]	A 9100 Metabolism; B 09101 Carbohydrate metabolism; C 00500 Starch and sucrose metabolism [PATH:ko00500]	811.1	0.670032	0.4084	1.64062	0.100875	0.157226	811.1	0.893762	0.408588	2.18744	0.0287102	0.0519691	811.1	0.892995	0.408562	2.1857	0.0288374	0.0584847	430	1423	1168	1085	635	703	419	809	910	718	690	708
Am_HQ_11429	C:GO:0000145; C:GO:0005829; C:GO:0005886; P:GO:0006887; P:GO:0006893; C:GO:0009506; P:GO:0048278; P:GO:0060321; C:GO:0070062	C:exocyst; C:cytosol; C:plasma membrane; P:exocytosis; P:Golgi to plasma membrane transport; C:plasmodesma; P:vesicle docking; P:acceptance of pollen; C:extracellular exosome	K19984	EXOC5, SEC10; exocyst complex component 5	A 9160 Human Diseases; B 09171 Infectious disease: bacterial; C 05132 Salmonella infection [PATH:ko05132]	854.422	0.115861	0.286126	0.404931	0.685528	0.7614	854.422	0.378135	0.286399	1.32031	0.186733	0.263103	854.422	0.091804	0.286092	0.32089	0.748294	0.826786	520	899	908	758	989	1095	489	930	973	751	876	1285
Am_HQ_58104	C:GO:0005778; P:GO:0005975; P:GO:0006144; F:GO:0008422; C:GO:0016021; P:GO:0019628; F:GO:0033971	C:peroxisomal membrane; P:carbohydrate metabolic process; P:purine nucleobase metabolic process; F:beta-glucosidase activity; C:integral component of membrane; P:urate catabolic process; F:hydroxyisourate hydrolase activity	K19964	HIUH; hydroxyisourate hydrolase [EC:3.5.2.17]	A 9100 Metabolism; B 09104 Nucleotide metabolism; C 00230 Purine metabolism [PATH:ko00230]	41.9422	4.71843	0.863252	5.46588	4.60611e-08	2.50131e-07	41.9422	6.92586	1.13723	6.09009	1.12847e-09	8.64366e-09	41.9422	1.14283	0.779188	1.4667	0.142458	0.226201	39	203	47	1	7	6	1	0	2	62	52	52
Am_HQ_70445	P:GO:0006541; F:GO:0016740; F:GO:0016787	P:glutamine metabolic process; F:transferase activity; F:hydrolase activity	.	.	.	384.734	8.70711	1.04021	8.37051	5.73712e-17	8.98503e-16	384.734	3.83044	0.949112	4.03582	5.44117e-05	0.000187259	384.734	7.48392	0.986928	7.58305	3.37529e-14	8.14271e-13	70	646	2830	5	3	3	37	126	177	9	11	6
Am_HQ_11433	F:GO:0016787; C:GO:0110165	F:hydrolase activity; C:cellular anatomical entity	.	.	.	130.302	-0.340268	0.34211	-0.994616	0.319923	0.414303	130.302	0.000630542	0.343819	0.00183394	0.998537	0.999125	130.302	-0.0766878	0.343264	-0.223407	0.823218	0.882054	118.67	80.19	90	174.99	135.89	187.22	77.13	164.06	156.77	111.92	163.61	140.9
Am_HQ_11439	.	.	.	.	.	253.401	0.226508	0.542619	0.417434	0.676361	0.754174	253.401	1.14662	0.544321	2.10651	0.0351604	0.062019	253.401	1.20802	0.544401	2.21899	0.0264874	0.0542916	468.83	150.29	242.74	318.15	480.74	206.8	118.82	242.4	186.9	141.29	223.04	160.19
Am_HQ_11450	F:GO:0004252; P:GO:0006508; F:GO:0070008	F:serine-type endopeptidase activity; P:proteolysis; F:serine-type exopeptidase activity	.	.	.	221.959	0.0516658	0.298029	0.173358	0.86237	0.901599	221.959	0.643827	0.300373	2.14343	0.0320788	0.0572274	221.959	0.0271381	0.297907	0.0910959	0.927416	0.957129	213.59	194.6	190.18	219.68	236.02	329.3	121.69	169.28	229.94	221.51	200	379.61
Am_HQ_69102	C:GO:0016021; F:GO:0022857; P:GO:0055085	C:integral component of membrane; F:transmembrane transporter activity; P:transmembrane transport	.	.	.	965.624	8.65485	1.01212	8.5512	1.21815e-17	2.03159e-16	965.624	8.35355	1.00607	8.30318	1.0136e-16	2.03254e-15	965.624	7.43077	0.992658	7.48572	7.11533e-14	1.65336e-12	5932	1415	1397	1	12	19	20	7	9	51	4	17
Am_HQ_53659	P:GO:0005982; P:GO:0005985; F:GO:0030599; P:GO:0042545; P:GO:0043086; F:GO:0045330; P:GO:0045490; F:GO:0046910	P:starch metabolic process; P:sucrose metabolic process; F:pectinesterase activity; P:cell wall modification; P:negative regulation of catalytic activity; F:aspartyl esterase activity; P:pectin catabolic process; F:pectinesterase inhibitor activity	K01051	E3.1.1.11; pectinesterase [EC:3.1.1.11]	A 9100 Metabolism; B 09101 Carbohydrate metabolism; C 00040 Pentose and glucuronate interconversions [PATH:ko00040]|A 9130 Environmental Information Processing; B 09132 Signal transduction; C 02020 Two-component system [PATH:ko02020]	46.3548	7.39181	1.92869	3.83255	0.000126822	0.000394665	46.3548	-2.46032	1.52854	-1.60959	0.107487	0.164081	46.3548	7.40329	1.92869	3.8385	0.000123787	0.000483551	48	1	15	0	0	0	46	270	214	0	0	0
Am_HQ_54215	F:GO:0004129; C:GO:0005743; P:GO:0006123; C:GO:0016021; F:GO:0020037; P:GO:0022900; C:GO:0045277; F:GO:0046872; P:GO:1902600; P:GO:1902600	F:cytochrome-c oxidase activity; C:mitochondrial inner membrane; P:mitochondrial electron transport, cytochrome c to oxygen; C:integral component of membrane; F:heme binding; P:electron transport chain; C:respiratory chain complex IV; F:metal ion binding; P:proton transmembrane transport; P:proton transmembrane transport	K02256	COX1; cytochrome c oxidase subunit 1 [EC:7.1.1.9]	A 9100 Metabolism; B 09102 Energy metabolism; C 00190 Oxidative phosphorylation [PATH:ko00190]|A 9150 Organismal Systems; B 09153 Circulatory system; C 04260 Cardiac muscle contraction [PATH:ko04260]|A 9150 Organismal Systems; B 09159 Environmental adaptation; C 04714 Thermogenesis [PATH:ko04714]|A 9160 Human Diseases; B 09161 Cancer: overview; C 05208 Chemical carcinogenesis - reactive oxygen sp…	826.459	-7.16785	2.5236	-2.84033	0.00450666	0.0101023	826.459	-12.8421	2.52163	-5.0928	3.52822e-07	1.79978e-06	826.459	-1.7432	2.60546	-0.669055	0.50346	0.619389	0	0	1	0	102	111	7892	824	628	0	0	5
Am_HQ_11471	F:GO:0003723; F:GO:0004527; F:GO:0004540; P:GO:0051252; P:GO:0090501	F:RNA binding; F:exonuclease activity; F:ribonuclease activity; P:regulation of RNA metabolic process; P:RNA phosphodiester bond hydrolysis	K12585	DIS3, RRP44; exosome complex exonuclease DIS3/RRP44 [EC:3.1.13.-]	A 9120 Genetic Information Processing; B 09123 Folding, sorting and degradation; C 03018 RNA degradation [PATH:ko03018]	160.76	-1.34412	0.522057	-2.57465	0.0100341	0.0206707	160.76	-0.566193	0.523992	-1.08054	0.279903	0.370267	160.76	-1.0092	0.522714	-1.93069	0.0535214	0.0989223	98.27	103.7	20.29	252.72	215.92	289.21	92.04	155.8	199.67	197.27	224.44	181.03
Am_HQ_1148	F:GO:0003677; F:GO:0008168; P:GO:0032259; F:GO:0052894; F:GO:0052895; F:GO:0052901	F:DNA binding; F:methyltransferase activity; P:methylation; F:norspermine:oxygen oxidoreductase activity; F:N1-acetylspermine:oxygen oxidoreductase (N1-acetylspermidine-forming) activity; F:spermine:oxygen oxidoreductase (spermidine-forming) activity	.	.	.	232.893	0.806916	0.851746	0.947367	0.343452	0.438959	232.893	1.2311	0.852411	1.44426	0.148665	0.216574	232.893	0.631489	0.851515	0.741606	0.458326	0.576621	452.41	59.1	301.01	184.39	94.89	401.24	98.82	72.87	332.6	178.95	111.76	465.57
Am_HQ_90207	.	.	.	.	.	3483.41	12.2674	0.704322	17.4173	6.09879e-68	2.0734e-65	3483.41	7.77123	0.526843	14.7506	3.05065e-49	1.00617e-46	3483.41	7.38677	0.524407	14.0859	4.63458e-45	1.70692e-42	14618	9042	9138	0	8	1	33	90	87	117	76	76
Am_HQ_11493	.	.	K08332	VAC8; vacuolar protein 8	None	180.11	-1.76803	0.371106	-4.76423	1.89575e-06	8.15026e-06	180.11	0.459868	0.379483	1.21183	0.225579	0.30841	180.11	-0.395817	0.374638	-1.05653	0.290725	0.404359	68	115	93	432	400	400	51	100	118	237	108	135
Am_HQ_11501	.	.	.	.	.	606.193	-4.49331	0.56566	-7.94348	1.96586e-15	2.65049e-14	606.193	-1.2265	0.568182	-2.15865	0.0308774	0.0553435	606.193	-1.01082	0.568567	-1.77784	0.0754304	0.132533	58.05	107.44	51.23	1485.14	1768.87	3275.37	137.95	302.53	228.44	301.21	53.55	220.14
Am_HQ_11518	P:GO:0002184; C:GO:0005829; C:GO:0005840; P:GO:0006449; F:GO:0016149; C:GO:0018444; P:GO:0051083; F:GO:1990825	P:cytoplasmic translational termination; C:cytosol; C:ribosome; P:regulation of translational termination; F:translation release factor activity, codon specific; C:translation release factor complex; P:'de novo' cotranslational protein folding; F:sequence-specific mRNA binding	K03265	ETF1, ERF1; peptide chain release factor subunit 1	A 9120 Genetic Information Processing; B 09122 Translation; C 03015 mRNA surveillance pathway [PATH:ko03015]	388.568	0.967666	0.579937	1.66857	0.0952024	0.149618	388.568	0.647955	0.579575	1.11798	0.263575	0.352379	388.568	0.796313	0.579707	1.37365	0.169551	0.260899	295.68	300.36	792.1	234.74	204.12	540.16	327.34	250.86	617.32	201.12	276.46	612.83
Am_HQ_75572	F:GO:0003676; C:GO:0005634; P:GO:0010468	F:nucleic acid binding; C:nucleus; P:regulation of gene expression	.	.	.	93.4191	2.95372	0.412333	7.16343	7.86842e-13	7.91426e-12	93.4191	6.87871	0.748655	9.1881	3.99852e-20	1.20217e-18	93.4191	0.107422	0.382569	0.28079	0.778871	0.849782	115	169	161	16	26	35	1	2	2	115	229	208
Am_HQ_40559	F:GO:0004345; P:GO:0006006; P:GO:0006098; P:GO:0006749; F:GO:0050661	F:glucose-6-phosphate dehydrogenase activity; P:glucose metabolic process; P:pentose-phosphate shunt; P:glutathione metabolic process; F:NADP binding	K00036	G6PD, zwf; glucose-6-phosphate 1-dehydrogenase [EC:1.1.1.49 1.1.1.363]	A 9100 Metabolism; B 09101 Carbohydrate metabolism; C 00030 Pentose phosphate pathway [PATH:ko00030]|A 9100 Metabolism; B 09106 Metabolism of other amino acids; C 00480 Glutathione metabolism [PATH:ko00480]|A 9160 Human Diseases; B 09161 Cancer: overview; C 05230 Central carbon metabolism in cancer [PATH:ko05230]|A 9160 Human Diseases; B 09166 Cardiovascular disease; C 05415 Diabetic cardiomyopat…	385.274	-11.9314	1.54023	-7.74648	9.44741e-15	1.18149e-13	385.274	-10.6675	1.54057	-6.92442	4.37772e-12	4.78908e-11	385.274	-10.3104	1.54071	-6.69198	2.20168e-11	3.40706e-10	0	0	0	1254.13	269.96	1404.19	500.98	77.65	596.41	379.48	49.27	525.06
Am_HQ_86482	C:GO:0009522; C:GO:0009523; C:GO:0009535; P:GO:0009765; C:GO:0016021; F:GO:0016168; P:GO:0018298	C:photosystem I; C:photosystem II; C:chloroplast thylakoid membrane; P:photosynthesis, light harvesting; C:integral component of membrane; F:chlorophyll binding; P:protein-chromophore linkage	K08914	LHCB3; light-harvesting complex II chlorophyll a/b binding protein 3	A 9100 Metabolism; B 09102 Energy metabolism; C 00196 Photosynthesis - antenna proteins [PATH:ko00196]	1883.68	-10.9023	0.786292	-13.8654	1.02585e-43	1.1566e-41	1883.68	-10.5317	0.786333	-13.3934	6.60899e-41	1.20699e-38	1883.68	-10.2768	0.786361	-13.0688	4.96645e-39	1.21943e-36	0	3	1	1966.86	3741.74	4574.4	2160.98	2426.48	3258.32	2130.45	1856.43	2642.88
Am_HQ_11532	F:GO:0004573; C:GO:0005789; P:GO:0006487; P:GO:0009311; C:GO:0016021	F:Glc3Man9GlcNAc2 oligosaccharide glucosidase activity; C:endoplasmic reticulum membrane; P:protein N-linked glycosylation; P:oligosaccharide metabolic process; C:integral component of membrane	K01228	MOGS; mannosyl-oligosaccharide glucosidase [EC:3.2.1.106]	A 9100 Metabolism; B 09107 Glycan biosynthesis and metabolism; C 00510 N-Glycan biosynthesis [PATH:ko00510]|A 9120 Genetic Information Processing; B 09123 Folding, sorting and degradation; C 04141 Protein processing in endoplasmic reticulum [PATH:ko04141]	809.533	0.784067	0.301454	2.60095	0.00929661	0.0193002	809.533	0.36929	0.301028	1.22676	0.219912	0.301914	809.533	0.417306	0.301045	1.38619	0.165689	0.255916	533.89	944	1101.3	405.62	711.9	883.16	748.09	933.59	937.05	781.59	741.75	1046.3
Am_HQ_11535	C:GO:0000220; P:GO:0006119; P:GO:0007035; C:GO:0016021; F:GO:0016787; F:GO:0046961; F:GO:0051117; P:GO:1902600; P:GO:1902600	C:vacuolar proton-transporting V-type ATPase, V0 domain; P:oxidative phosphorylation; P:vacuolar acidification; C:integral component of membrane; F:hydrolase activity; F:proton-transporting ATPase activity, rotational mechanism; F:ATPase binding; P:proton transmembrane transport; P:proton transmembrane transport	K02154	ATPeV0A, ATP6N; V-type H+-transporting ATPase subunit a	A 9100 Metabolism; B 09102 Energy metabolism; C 00190 Oxidative phosphorylation [PATH:ko00190]|A 9140 Cellular Processes; B 09141 Transport and catabolism; C 04145 Phagosome [PATH:ko04145]|A 9140 Cellular Processes; B 09141 Transport and catabolism; C 04142 Lysosome [PATH:ko04142]|A 9150 Organismal Systems; B 09155 Excretory system; C 04966 Collecting duct acid secretion [PATH:ko04966]|A 9150 Org…	583.453	0.571132	0.461725	1.23695	0.216105	0.299104	583.453	0.248457	0.461459	0.538417	0.590289	0.679103	583.453	0.697413	0.461836	1.51009	0.131021	0.211305	578.56	868.94	388.65	507.09	730.29	364.34	623.73	976.02	403.99	461.04	647.57	390.58
Am_HQ_25624	F:GO:0005506; P:GO:0008610; F:GO:0009924; C:GO:0016021; F:GO:0016491; F:GO:1990465	F:iron ion binding; P:lipid biosynthetic process; F:octadecanal decarbonylase activity; C:integral component of membrane; F:oxidoreductase activity; F:aldehyde oxygenase (deformylating) activity	.	.	.	1518.23	-13.068	1.27528	-10.2471	1.21934e-24	3.93932e-23	1518.23	-14.0527	1.27522	-11.0198	3.06666e-28	2.02895e-26	1518.23	-10.2576	1.27605	-8.03857	9.08911e-16	2.70689e-14	0	0	0	2429.86	1743.15	2132.06	1775.91	5170.97	5985.24	468.69	220.93	213.14
Am_HQ_75950	F:GO:0003824	F:catalytic activity	.	.	.	2240.47	-13.9709	1.24192	-11.2494	2.33222e-29	1.03697e-27	2240.47	-11.5851	1.24208	-9.32719	1.08716e-20	3.50205e-19	2240.47	-10.2042	1.24238	-8.21342	2.14969e-16	6.99614e-15	0	1	0	7755.59	5981	9494	1186	1299	1949	486	316	922
Am_HQ_86369	F:GO:0003924; F:GO:0005525; C:GO:0005634; P:GO:0006913; P:GO:0015031	F:GTPase activity; F:GTP binding; C:nucleus; P:nucleocytoplasmic transport; P:protein transport	K07936	RAN; GTP-binding nuclear protein Ran	A 9120 Genetic Information Processing; B 09122 Translation; C 03013 Nucleocytoplasmic transport [PATH:ko03013]|A 9120 Genetic Information Processing; B 09122 Translation; C 03008 Ribosome biogenesis in eukaryotes [PATH:ko03008]|A 9160 Human Diseases; B 09172 Infectious disease: viral; C 05166 Human T-cell leukemia virus 1 infection [PATH:ko05166]	29.7655	5.84868	1.67197	3.49807	0.000468633	0.00130253	29.7655	2.57797	1.56994	1.64208	0.100574	0.15493	29.7655	7.38565	1.86762	3.95459	7.66667e-05	0.000315666	2	17	227	1	0	5	23	9	21	0	0	2
Am_HQ_73298	C:GO:0016021; F:GO:0016788	C:integral component of membrane; F:hydrolase activity, acting on ester bonds	.	.	.	414.278	-7.83929	1.72748	-4.53799	5.67935e-06	2.25278e-05	414.278	-12.7905	1.72401	-7.41904	1.17971e-13	1.58765e-12	414.278	0	2.08791	0	1	1	0	0	0	8	147.27	7	1841.34	1782.93	1486.38	0	0	0
Am_HQ_86628	F:GO:0003993; P:GO:0006771; P:GO:0016311; P:GO:0019497	F:acid phosphatase activity; P:riboflavin metabolic process; P:dephosphorylation; P:hexachlorocyclohexane metabolic process	.	.	.	3665.33	-11.0306	1.26317	-8.73248	2.4915e-18	4.47256e-17	3665.33	-13.0482	1.26309	-10.3304	5.13667e-25	2.51129e-23	3665.33	-10.1905	1.26324	-8.06697	7.20655e-16	2.17555e-14	2	1	0	466	6194	1690	14231	8158	10981	288	3224	1263
Am_HQ_2936	F:GO:0004672; F:GO:0005524; P:GO:0006468	F:protein kinase activity; F:ATP binding; P:protein phosphorylation	K16240	SPA1; protein suppressor of PHYA-105 1	A 9150 Organismal Systems; B 09159 Environmental adaptation; C 04712 Circadian rhythm - plant [PATH:ko04712]	536.332	-12.3742	1.2538	-9.86941	5.6498e-23	1.57043e-21	536.332	-11.5533	1.25397	-9.21339	3.1599e-20	9.63137e-19	536.332	-10.1742	1.25455	-8.10981	5.06969e-16	1.56905e-14	0	0	0	1097.52	1098.45	1775.12	566.34	708.28	957.01	385.86	128.46	345.67
Am_HQ_11585	F:GO:0004842; P:GO:0016567; C:GO:0019005; P:GO:0031146	F:ubiquitin-protein transferase activity; P:protein ubiquitination; C:SCF ubiquitin ligase complex; P:SCF-dependent proteasomal ubiquitin-dependent protein catabolic process	K14515	EBF1_2; EIN3-binding F-box protein	A 9130 Environmental Information Processing; B 09132 Signal transduction; C 04016 MAPK signaling pathway - plant [PATH:ko04016]|A 9130 Environmental Information Processing; B 09132 Signal transduction; C 04075 Plant hormone signal transduction [PATH:ko04075]	1669.92	-0.376628	0.394824	-0.953916	0.340126	0.43554	1669.92	-0.760741	0.394711	-1.92734	0.0539377	0.0902898	1669.92	-0.396574	0.394812	-1.00446	0.315155	0.431439	878.54	1448.17	784.95	1382.25	2041.16	1897.82	893.98	3157.93	3111.52	1750.18	1582.39	2110.15
Am_HQ_11588	P:GO:0001732; F:GO:0003743; C:GO:0005840; C:GO:0005852; P:GO:0006446; C:GO:0016282; F:GO:0031369; C:GO:0033290	P:formation of cytoplasmic translation initiation complex; F:translation initiation factor activity; C:ribosome; C:eukaryotic translation initiation factor 3 complex; P:regulation of translational initiation; C:eukaryotic 43S preinitiation complex; F:translation initiation factor binding; C:eukaryotic 48S preinitiation complex	K03252	EIF3C; translation initiation factor 3 subunit C	None	897.093	-0.213482	0.141267	-1.51119	0.130739	0.195459	897.093	-0.408661	0.140968	-2.89895	0.00374411	0.00847979	897.093	-0.203646	0.141258	-1.44166	0.149399	0.23521	574.87	737	581.79	936.66	916.89	1069	885.39	1231.97	1227	808.26	1000.25	1119.42
Am_HQ_62428	P:GO:0006633; C:GO:0009570; F:GO:0045300; F:GO:0046872; F:GO:0102786	P:fatty acid biosynthetic process; C:chloroplast stroma; F:acyl-[acyl-carrier-protein] desaturase activity; F:metal ion binding; F:stearoyl-[acp] desaturase activity	K03921	FAB2, SSI2, desA1; acyl-[acyl-carrier-protein] desaturase [EC:1.14.19.2 1.14.19.11 1.14.19.26]	A 9100 Metabolism; B 09103 Lipid metabolism; C 00061 Fatty acid biosynthesis [PATH:ko00061]|A 9100 Metabolism; B 09103 Lipid metabolism; C 01040 Biosynthesis of unsaturated fatty acids [PATH:ko01040]	1718.97	10.3894	0.813316	12.7741	2.28751e-37	1.67382e-35	1718.97	7.39409	0.742251	9.96172	2.24161e-23	9.47134e-22	1718.97	7.38464	0.741964	9.95283	2.45103e-23	1.75854e-21	7642.23	7236.69	1497.91	4.15	10.78	1.03	24.01	67.23	41.95	44.6	64.85	21.89
Am_HQ_87471	F:GO:0004601; C:GO:0005634; C:GO:0005829; P:GO:0006804; P:GO:0006979; P:GO:0045454; F:GO:0051920; P:GO:0098869	F:peroxidase activity; C:nucleus; C:cytosol; P:obsolete peroxidase reaction; P:response to oxidative stress; P:cell redox homeostasis; F:peroxiredoxin activity; P:cellular oxidant detoxification	K11188	PRDX6; peroxiredoxin 6 [EC:1.11.1.7 1.11.1.27 3.1.1.-]	A 9100 Metabolism; B 09106 Metabolism of other amino acids; C 00480 Glutathione metabolism [PATH:ko00480]|A 9100 Metabolism; B 09110 Biosynthesis of other secondary metabolites; C 00940 Phenylpropanoid biosynthesis [PATH:ko00940]	662.682	-10.439	1.2577	-8.30002	1.04092e-16	1.58856e-15	662.682	-9.51623	1.25791	-7.5651	3.87565e-14	5.56854e-13	662.682	-10.1689	1.25775	-8.085	6.21662e-16	1.88702e-14	0	1	1	2055	886	600	464	1003	457	1050	1684	282
Am_HQ_87248	C:GO:0005576	C:extracellular region	.	.	.	1518.76	4.55551	0.701987	6.48945	8.61507e-11	6.7081e-10	1518.76	4.62271	0.7021	6.58412	4.57576e-11	4.31379e-10	1518.76	7.35135	0.713218	10.3073	6.53134e-25	5.38543e-23	1160	2436	10142	142	258	390	238	165	330	20	35	58
Am_HQ_49890	C:GO:0005634	C:nucleus	.	.	.	481.579	-12.4581	1.21918	-10.2184	1.63986e-24	5.2291e-23	481.579	-10.7683	1.21965	-8.82898	1.05633e-18	2.67692e-17	481.579	-10.1424	1.22	-8.3135	9.29194e-17	3.18346e-15	0	0	0	1718	1089	1310	409	392	473	358	209	271
Am_HQ_11602	F:GO:0003723; F:GO:0004527; F:GO:0004540; P:GO:0051252; P:GO:0090501	F:RNA binding; F:exonuclease activity; F:ribonuclease activity; P:regulation of RNA metabolic process; P:RNA phosphodiester bond hydrolysis	K12585	DIS3, RRP44; exosome complex exonuclease DIS3/RRP44 [EC:3.1.13.-]	A 9120 Genetic Information Processing; B 09123 Folding, sorting and degradation; C 03018 RNA degradation [PATH:ko03018]	311.918	-0.950059	0.427029	-2.22481	0.0260938	0.0481842	311.918	-0.451044	0.427772	-1.0544	0.291698	0.383004	311.918	-0.352937	0.427892	-0.824828	0.409469	0.528655	282.79	162.95	83.35	490.52	397.63	518.62	259.95	322.46	418.26	272.59	336.05	328.34
Am_HQ_86571	C:GO:0005886; F:GO:0008515; C:GO:0012506; P:GO:0015770; C:GO:0016021; C:GO:0032588; P:GO:0071836	C:plasma membrane; F:sucrose transmembrane transporter activity; C:vesicle membrane; P:sucrose transport; C:integral component of membrane; C:trans-Golgi network membrane; P:nectar secretion	K15382	SLC50A, SWEET; solute carrier family 50 (sugar transporter)	None	1406.81	-7.43288	1.29618	-5.73444	9.78364e-09	5.8527e-08	1406.81	-12.7262	1.29446	-9.83132	8.25278e-23	3.27415e-21	1406.81	-2.82252	1.3366	-2.11171	0.0347112	0.068462	0	1	1	38	254.19	164.63	6233.04	6383.14	4825.62	0	7	12
Am_HQ_11611	F:GO:0003700; C:GO:0005634; C:GO:0005667; P:GO:0006355; F:GO:0043565	F:DNA-binding transcription factor activity; C:nucleus; C:transcription regulator complex; P:regulation of transcription, DNA-templated; F:sequence-specific DNA binding	.	.	.	250.412	0.385908	0.331201	1.16518	0.243947	0.33066	250.412	0.400748	0.331288	1.20967	0.226407	0.309408	250.412	0.276788	0.330852	0.83659	0.402823	0.522363	314.34	184.53	213.2	216.03	240.15	293.01	176.33	254.41	314.38	196.12	271.9	345.18
Am_HQ_62183	F:GO:0005506; F:GO:0016705; F:GO:0020037	F:iron ion binding; F:oxidoreductase activity, acting on paired donors, with incorporation or reduction of molecular oxygen; F:heme binding	K10717	CYP735A; cytokinin trans-hydroxylase	A 9100 Metabolism; B 09109 Metabolism of terpenoids and polyketides; C 00908 Zeatin biosynthesis [PATH:ko00908]	60.458	7.7265	1.51561	5.09796	3.43333e-07	1.64185e-06	60.458	6.84486	1.41107	4.85082	1.22953e-06	5.73439e-06	60.458	2.37425	1.27936	1.85581	0.0634802	0.114607	374	21	51	0	3	0	0	1	5	39	39	49
Am_HQ_11618	.	.	.	.	.	446.834	0.206205	0.481035	0.42867	0.668163	0.747144	446.834	-0.193806	0.480627	-0.403235	0.686775	0.762593	446.834	-0.0442018	0.480742	-0.0919449	0.926742	0.956612	389.24	205.72	459.49	408.55	278.94	577.9	626.35	346.03	640.55	544.37	273.08	685.95
Am_HQ_11619	F:GO:0003924; F:GO:0005525; C:GO:0005768; C:GO:0005829; C:GO:0005886; P:GO:0006886; P:GO:0009733; P:GO:0032482; P:GO:0042546	F:GTPase activity; F:GTP binding; C:endosome; C:cytosol; C:plasma membrane; P:intracellular protein transport; P:response to auxin; P:Rab protein signal transduction; P:cell wall biogenesis	K07904	RAB11A; Ras-related protein Rab-11A	A 9140 Cellular Processes; B 09141 Transport and catabolism; C 04144 Endocytosis [PATH:ko04144]|A 9150 Organismal Systems; B 09154 Digestive system; C 04972 Pancreatic secretion [PATH:ko04972]|A 9150 Organismal Systems; B 09155 Excretory system; C 04962 Vasopressin-regulated water reabsorption [PATH:ko04962]|A 9150 Organismal Systems; B 09155 Excretory system; C 04961 Endocrine and other factor-r…	113.074	-0.383727	0.269978	-1.42133	0.155221	0.225886	113.074	0.210604	0.274471	0.767307	0.442899	0.538823	113.074	-0.180424	0.271187	-0.665313	0.505851	0.621512	88.2	92.92	75.45	134.3	131.56	183.8	60.75	103.24	136.21	139.11	133	118.22
Am_HQ_65119	P:GO:0016042; F:GO:0016788	P:lipid catabolic process; F:hydrolase activity, acting on ester bonds	K01052	LIPA; lysosomal acid lipase/cholesteryl ester hydrolase [EC:3.1.1.13]	A 9100 Metabolism; B 09103 Lipid metabolism; C 00100 Steroid biosynthesis [PATH:ko00100]|A 9140 Cellular Processes; B 09141 Transport and catabolism; C 04142 Lysosome [PATH:ko04142]|A 9150 Organismal Systems; B 09154 Digestive system; C 04979 Cholesterol metabolism [PATH:ko04979]	368.509	-4.89949	3.99803	-1.22548	0.220396	0.304062	368.509	-12.6607	3.9862	-3.17614	0.00149248	0.00371447	368.509	0	4.15654	0	1	1	0	0	0	0	21	0	3183.79	653.09	482.61	0	0	0
Am_HQ_88718	C:GO:0005615	C:extracellular space	.	.	.	368.581	-5.96704	4.2217	-1.41342	0.157532	0.228797	368.581	-12.6537	4.21639	-3.00107	0.00269037	0.00630186	368.581	0	4.37778	0	1	1	0	0	0	0	44	0	3204	623	464	0	0	0
Am_HQ_89113	F:GO:0004497; C:GO:0009573; P:GO:0009853; F:GO:0016984; P:GO:0019253; P:GO:0046487	F:monooxygenase activity; C:chloroplast ribulose bisphosphate carboxylase complex; P:photorespiration; F:ribulose-bisphosphate carboxylase activity; P:reductive pentose-phosphate cycle; P:glyoxylate metabolic process	K01602	rbcS, cbbS; ribulose-bisphosphate carboxylase small chain [EC:4.1.1.39]	A 9100 Metabolism; B 09101 Carbohydrate metabolism; C 00630 Glyoxylate and dicarboxylate metabolism [PATH:ko00630]|A 9100 Metabolism; B 09102 Energy metabolism; C 00710 Carbon fixation in photosynthetic organisms [PATH:ko00710]	12062.6	-12.5088	0.613376	-20.3934	1.91457e-92	1.9231e-89	12062.6	-10.8357	0.613413	-17.6647	7.84668e-70	6.42207e-67	12062.6	-10.1224	0.613444	-16.5009	3.61492e-61	3.07241e-58	0	13	1	38203.6	25233.9	41398.5	11188.9	10265.7	10710.3	7120.63	4297.77	8772.55
Am_HQ_40894	C:GO:0005576; C:GO:0005618; P:GO:0005982; P:GO:0005985; C:GO:0016021; F:GO:0030599; P:GO:0042545; P:GO:0043086; F:GO:0045330; P:GO:0045490; F:GO:0046910	C:extracellular region; C:cell wall; P:starch metabolic process; P:sucrose metabolic process; C:integral component of membrane; F:pectinesterase activity; P:cell wall modification; P:negative regulation of catalytic activity; F:aspartyl esterase activity; P:pectin catabolic process; F:pectinesterase inhibitor activity	K01051	E3.1.1.11; pectinesterase [EC:3.1.1.11]	A 9100 Metabolism; B 09101 Carbohydrate metabolism; C 00040 Pentose and glucuronate interconversions [PATH:ko00040]|A 9130 Environmental Information Processing; B 09132 Signal transduction; C 02020 Two-component system [PATH:ko02020]	2334.56	-1.0313	1.26923	-0.812538	0.416483	0.514763	2334.56	-7.42049	1.26695	-5.85699	4.71322e-09	3.2701e-08	2334.56	7.35131	1.72993	4.24949	2.14257e-05	0.000100845	1	114	27	42	262	41	19989	4197	2797	0	1	0
Am_HQ_11633	C:GO:0000932; C:GO:0005634; P:GO:0006355; P:GO:0017148; C:GO:0030015	C:P-body; C:nucleus; P:regulation of transcription, DNA-templated; P:negative regulation of translation; C:CCR4-NOT core complex	K12580	CNOT3, NOT3; CCR4-NOT transcription complex subunit 3	A 9120 Genetic Information Processing; B 09123 Folding, sorting and degradation; C 03018 RNA degradation [PATH:ko03018]	455.123	0.192978	2.34983	0.0821243	0.934548	0.954945	455.123	0.703712	2.34996	0.299458	0.764591	0.825803	455.123	0.200472	2.34983	0.0853134	0.932012	0.960445	476.8	871.02	5.23	700.14	749.38	12.42	452.23	572.53	0	714.89	802.3	0
Am_HQ_11635	.	.	.	.	.	111.686	-0.587368	0.413637	-1.42001	0.155605	0.22637	111.686	-0.323472	0.414936	-0.77957	0.435644	0.531665	111.686	-0.627271	0.413408	-1.51732	0.129187	0.208743	35.08	52.58	119.39	115.22	148.25	149.82	90.64	135.33	117.45	139.2	141.2	146.73
Am_HQ_36148	F:GO:0005524	F:ATP binding	K03283	HSPA1s; heat shock 70kDa protein 1/2/6/8	A 9120 Genetic Information Processing; B 09121 Transcription; C 03040 Spliceosome [PATH:ko03040]|A 9120 Genetic Information Processing; B 09123 Folding, sorting and degradation; C 04141 Protein processing in endoplasmic reticulum [PATH:ko04141]|A 9130 Environmental Information Processing; B 09132 Signal transduction; C 04010 MAPK signaling pathway [PATH:ko04010]|A 9140 Cellular Processes; B 09141…	127.212	7.87657	1.22327	6.43895	1.20305e-10	9.18628e-10	127.212	7.76184	1.21485	6.38916	1.66798e-10	1.43198e-09	127.212	7.35098	1.18441	6.20645	5.41938e-10	6.62742e-09	35	166	1037	2	2	3	5	1.86	0	5	3	2
Am_HQ_11652	F:GO:0005524; F:GO:0008716; P:GO:0009252; P:GO:0046436; F:GO:0046872	F:ATP binding; F:D-alanine-D-alanine ligase activity; P:peptidoglycan biosynthetic process; P:D-alanine metabolic process; F:metal ion binding	.	.	.	76.9314	0.192092	1.21477	0.158131	0.874354	0.910274	76.9314	0.530111	1.21593	0.435971	0.662858	0.742527	76.9314	-0.78887	1.21266	-0.650528	0.515351	0.630368	35.98	94.08	50	19.4	58.23	136.76	109.42	35.83	0	143.91	188.47	70.41
Am_HQ_11659	C:GO:0000307; P:GO:0000398; F:GO:0003723; F:GO:0004693; F:GO:0005524; F:GO:0008353; P:GO:0009069; P:GO:0032968; F:GO:0046872; P:GO:0051726; P:GO:0051726; P:GO:0070816; C:GO:0089701	C:cyclin-dependent protein kinase holoenzyme complex; P:mRNA splicing, via spliceosome; F:RNA binding; F:cyclin-dependent protein serine/threonine kinase activity; F:ATP binding; F:RNA polymerase II CTD heptapeptide repeat kinase activity; P:serine family amino acid metabolic process; P:positive regulation of transcription elongation from RNA polymerase II promoter; F:metal ion binding; P:regulat…	.	.	.	316.347	0.163223	0.6324	0.2581	0.796329	0.851485	316.347	-0.57817	0.631675	-0.915297	0.360036	0.454971	316.347	0.526274	0.6329	0.831528	0.405676	0.525045	58	230	486	214	233	478	326	647	549	139	316	252
Am_HQ_48652	C:GO:0005886; F:GO:0015333; C:GO:0016021; P:GO:0035672; F:GO:0035673; P:GO:1902600	C:plasma membrane; F:peptide:proton symporter activity; C:integral component of membrane; P:oligopeptide transmembrane transport; F:oligopeptide transmembrane transporter activity; P:proton transmembrane transport	.	.	.	361.639	-4.04034	1.5972	-2.52965	0.0114177	0.0231752	361.639	-12.636	1.54256	-8.19156	2.57856e-16	4.91215e-15	361.639	-1.41185	1.8527	-0.762049	0.446031	0.564674	0	0	0	3	6	3	3180	588	468	0	0	2
Am_HQ_64306	F:GO:0016747	F:acyltransferase activity, transferring groups other than amino-acyl groups	.	.	.	283.363	-10.8319	2.13174	-5.08124	3.74979e-07	1.78661e-06	283.363	-11.0135	2.1317	-5.16655	2.38458e-07	1.24544e-06	283.363	-10.1194	2.13197	-4.7465	2.06967e-06	1.2381e-05	0	0	0	703.57	557.13	10.23	493.64	899.59	81.84	324.99	486.27	0
Am_HQ_11678	F:GO:0004672; F:GO:0004842; F:GO:0005524; P:GO:0006468; P:GO:0016567	F:protein kinase activity; F:ubiquitin-protein transferase activity; F:ATP binding; P:protein phosphorylation; P:protein ubiquitination	.	.	.	215.143	0.151101	1.82014	0.0830162	0.933839	0.954617	215.143	-0.107764	1.81999	-0.0592113	0.952784	0.966371	215.143	-0.180512	1.81994	-0.0991861	0.920991	0.952945	234.89	274.29	1.46	307.12	271.47	1.68	301.34	392.4	3.2	358.29	403.56	1.39
Am_HQ_24262	F:GO:0000287; F:GO:0004737; C:GO:0005829; P:GO:0006094; P:GO:0006096; F:GO:0030976	F:magnesium ion binding; F:pyruvate decarboxylase activity; C:cytosol; P:gluconeogenesis; P:glycolytic process; F:thiamine pyrophosphate binding	K01568	PDC, pdc; pyruvate decarboxylase [EC:4.1.1.1]	A 9100 Metabolism; B 09101 Carbohydrate metabolism; C 00010 Glycolysis / Gluconeogenesis [PATH:ko00010]	133.189	7.70964	1.47817	5.21568	1.83149e-07	9.08672e-07	133.189	4.39095	1.39473	3.14824	0.00164258	0.00404477	133.189	7.34323	1.45712	5.03954	4.66645e-07	3.22449e-06	659.44	430.58	102.35	0	4.42	4.46	0	25.06	59.38	5.15	5	0
Am_HQ_36031	.	.	K20628	exlX; expansin	None	357.704	-7.73601	1.57574	-4.90943	9.13419e-07	4.11262e-06	357.704	-12.5744	1.57167	-8.00068	1.23731e-15	2.17518e-14	357.704	-1.4108	1.8772	-0.751546	0.452324	0.570712	0	0	0	48.81	22.63	89.69	2570.87	167.33	1483.3	0	0	2
Am_HQ_117	F:GO:0003712; C:GO:0005667; P:GO:0006355; P:GO:0006357; C:GO:0016592	F:transcription coregulator activity; C:transcription regulator complex; P:regulation of transcription, DNA-templated; P:regulation of transcription by RNA polymerase II; C:mediator complex	K15164	MED13; mediator of RNA polymerase II transcription subunit 13	A 9150 Organismal Systems; B 09152 Endocrine system; C 04919 Thyroid hormone signaling pathway [PATH:ko04919]	786.193	-0.32098	0.298541	-1.07516	0.282303	0.373597	786.193	-0.0120341	0.298842	-0.0402691	0.967879	0.978086	786.193	-0.157458	0.298671	-0.527197	0.598057	0.704207	712.12	478.54	527.8	988.17	932.68	994.32	494.37	932.02	967.23	662.34	974.91	997.86
Am_HQ_12289	F:GO:0003678; F:GO:0005524; C:GO:0005657; F:GO:0016787; P:GO:0032508; P:GO:0045003; P:GO:0051701; P:GO:0071248; P:GO:0071480	F:DNA helicase activity; F:ATP binding; C:replication fork; F:hydrolase activity; P:DNA duplex unwinding; P:double-strand break repair via synthesis-dependent strand annealing; P:biological process involved in interaction with host; P:cellular response to metal ion; P:cellular response to gamma radiation	K10875	RAD54L, RAD54; DNA repair and recombination protein RAD54 and RAD54-like protein [EC:3.6.4.-]	A 9120 Genetic Information Processing; B 09124 Replication and repair; C 03440 Homologous recombination [PATH:ko03440]	134.686	2.49462	1.27101	1.96271	0.0496795	0.0850296	134.686	2.6363	1.27141	2.07352	0.0381243	0.0666195	134.686	7.33687	1.36484	5.37563	7.63164e-08	6.26697e-07	485.79	56.5	382.93	101.43	82.29	41.79	135.83	1.08	56.06	5.09	2.53	0
Am_HQ_87147	C:GO:0005886; C:GO:0016021; P:GO:0034219; F:GO:0051119	C:plasma membrane; C:integral component of membrane; P:carbohydrate transmembrane transport; F:sugar transmembrane transporter activity	K15382	SLC50A, SWEET; solute carrier family 50 (sugar transporter)	None	459.626	3.35251	1.42952	2.3452	0.0190169	0.0364345	459.626	-1.8589	1.42376	-1.30563	0.19168	0.26897	459.626	7.31143	1.51206	4.8354	1.32877e-06	8.28531e-06	203	60	668	0	113	6	1229	1474	1899	0	6	2
Am_HQ_58063	P:GO:0006633; C:GO:0009570; F:GO:0045300; F:GO:0046872; F:GO:0102786	P:fatty acid biosynthetic process; C:chloroplast stroma; F:acyl-[acyl-carrier-protein] desaturase activity; F:metal ion binding; F:stearoyl-[acp] desaturase activity	K03921	FAB2, SSI2, desA1; acyl-[acyl-carrier-protein] desaturase [EC:1.14.19.2 1.14.19.11 1.14.19.26]	A 9100 Metabolism; B 09103 Lipid metabolism; C 00061 Fatty acid biosynthesis [PATH:ko00061]|A 9100 Metabolism; B 09103 Lipid metabolism; C 01040 Biosynthesis of unsaturated fatty acids [PATH:ko01040]	2175.19	10.545	0.922779	11.4274	3.04974e-30	1.4218e-28	2175.19	7.01277	0.865767	8.10007	5.49298e-16	1.00817e-14	2175.19	7.30423	0.866888	8.4258	3.58296e-17	1.28742e-15	7282.92	7682.81	5864.36	0	17.91	0	55.58	59.05	103.24	55.05	39.88	84.43
Am_HQ_10947	F:GO:0004072; F:GO:0004412; P:GO:0006544; P:GO:0006563; P:GO:0006566; P:GO:0009085; P:GO:0016310; F:GO:0050661	F:aspartate kinase activity; F:homoserine dehydrogenase activity; P:glycine metabolic process; P:L-serine metabolic process; P:threonine metabolic process; P:lysine biosynthetic process; P:phosphorylation; F:NADP binding	K12524	thrA; bifunctional aspartokinase / homoserine dehydrogenase 1 [EC:2.7.2.4 1.1.1.3]	A 9100 Metabolism; B 09105 Amino acid metabolism; C 00260 Glycine, serine and threonine metabolism [PATH:ko00260]|A 9100 Metabolism; B 09105 Amino acid metabolism; C 00270 Cysteine and methionine metabolism [PATH:ko00270]|A 9100 Metabolism; B 09105 Amino acid metabolism; C 00300 Lysine biosynthesis [PATH:ko00300]|A 9100 Metabolism; B 09110 Biosynthesis of other secondary metabolites; C 00261 Mono…	69.1993	-6.38998	2.95395	-2.1632	0.0305258	0.055369	69.1993	-4.98643	2.9635	-1.68262	0.0924496	0.143839	69.1993	-10.1112	2.94865	-3.42909	0.000605607	0.00199951	0	0	0	57.8	0	0	0	23.77	0	287.45	331.13	199.24
Am_HQ_35893	.	.	K18857	ADH1; alcohol dehydrogenase class-P [EC:1.1.1.1]	A 9100 Metabolism; B 09101 Carbohydrate metabolism; C 00010 Glycolysis / Gluconeogenesis [PATH:ko00010]|A 9100 Metabolism; B 09101 Carbohydrate metabolism; C 00620 Pyruvate metabolism [PATH:ko00620]|A 9100 Metabolism; B 09103 Lipid metabolism; C 00071 Fatty acid degradation [PATH:ko00071]|A 9100 Metabolism; B 09103 Lipid metabolism; C 00592 alpha-Linolenic acid metabolism [PATH:ko00592]|A 9100 Me…	191.106	11.1575	1.31723	8.47041	2.44524e-17	3.96731e-16	191.106	7.56368	0.713572	10.5997	2.98788e-26	1.6756e-24	191.106	7.28622	0.691955	10.5299	6.28983e-26	5.76733e-24	834.19	426.24	526.02	0	1.21	0	3.59	2.37	7.26	3.69	2.43	10.18
Am_HQ_78778	F:GO:0016491	F:oxidoreductase activity	K22374	DMAS1; 3''-deamino-3''-oxonicotianamine reductase [EC:1.1.1.285]	A 9100 Metabolism; B 09110 Biosynthesis of other secondary metabolites; C 00999 Biosynthesis of various plant secondary metabolites [PATH:ko00999]	1157.51	-10.3636	0.761828	-13.6036	3.81033e-42	3.86242e-40	1157.51	-8.73243	0.762247	-11.4562	2.18988e-30	1.75971e-28	1157.51	-10.1061	0.761864	-13.265	3.69346e-40	1.00763e-37	0	3.73	0	2467.25	1695.85	2860.8	696.53	702.51	834.64	2012.44	1587.7	2290.91
Am_HQ_56375	P:GO:0006855; F:GO:0015297; C:GO:0016021; F:GO:0042910	P:xenobiotic transmembrane transport; F:antiporter activity; C:integral component of membrane; F:xenobiotic transmembrane transporter activity	K03327	TC.MATE, SLC47A, norM, mdtK, dinF; multidrug resistance protein, MATE family	None	1066.92	-11.5713	1.2455	-9.29047	1.53611e-20	3.41498e-19	1066.92	-12.4334	1.24541	-9.98337	1.80235e-23	7.71866e-22	1066.92	-10.0989	1.24583	-8.10618	5.22371e-16	1.6122e-14	0	1	0	1523.54	940.44	1960.84	1452.05	2439	4276.45	565	384	642
Am_HQ_41961	P:GO:0006782; F:GO:0008883; F:GO:0050661	P:protoporphyrinogen IX biosynthetic process; F:glutamyl-tRNA reductase activity; F:NADP binding	K02492	hemA; glutamyl-tRNA reductase [EC:1.2.1.70]	A 9100 Metabolism; B 09108 Metabolism of cofactors and vitamins; C 00860 Porphyrin metabolism [PATH:ko00860]	206.692	-9.75457	1.23754	-7.8822	3.21669e-15	4.26409e-14	206.692	-10.7277	1.2369	-8.67304	4.20743e-18	9.96524e-17	206.692	-10.092	1.23726	-8.15675	3.44154e-16	1.09584e-14	0	0	0	193	155	299	213	509	558	275	228	309
Am_HQ_26823	F:GO:0004672; F:GO:0005524; P:GO:0006468; C:GO:0016021	F:protein kinase activity; F:ATP binding; P:protein phosphorylation; C:integral component of membrane	.	.	.	62.8918	0	1.99202	0	1	1	62.8918	-5.70391	1.62341	-3.51354	0.00044218	0.00124554	62.8918	-10.0475	1.60724	-6.25143	4.06706e-10	5.12394e-09	0	0	0	0	0	0	7	18	14	62	586	132
Am_HQ_11744	C:GO:0005829; P:GO:0006094; F:GO:0008964; C:GO:0009507; P:GO:0015977; P:GO:0019643; C:GO:0048046; P:GO:0048366	C:cytosol; P:gluconeogenesis; F:phosphoenolpyruvate carboxylase activity; C:chloroplast; P:carbon fixation; P:reductive tricarboxylic acid cycle; C:apoplast; P:leaf development	K01595	ppc; phosphoenolpyruvate carboxylase [EC:4.1.1.31]	A 9100 Metabolism; B 09101 Carbohydrate metabolism; C 00620 Pyruvate metabolism [PATH:ko00620]|A 9100 Metabolism; B 09102 Energy metabolism; C 00710 Carbon fixation in photosynthetic organisms [PATH:ko00710]|A 9100 Metabolism; B 09102 Energy metabolism; C 00720 Carbon fixation pathways in prokaryotes [PATH:ko00720]|A 9100 Metabolism; B 09102 Energy metabolism; C 00680 Methane metabolism [PATH:ko0…	302.494	-3.35296	1.6546	-2.02646	0.0427181	0.0744937	302.494	-2.52029	1.65485	-1.52298	0.127764	0.190483	302.494	-1.58912	1.65533	-0.959998	0.337056	0.454884	17.62	0	127.5	321.73	38.66	1818.73	346.49	6.82	795.84	236.51	18.06	349.5
Am_HQ_85708	F:GO:0030246	F:carbohydrate binding	.	.	.	195.122	-9.42481	1.40405	-6.71256	1.91235e-11	1.61665e-10	195.122	-10.7757	1.40317	-7.67958	1.59605e-14	2.43071e-13	195.122	-9.97141	1.40358	-7.10427	1.20964e-12	2.26531e-11	0	0	0	162	150	197	690	207	319	57	373	320
Am_HQ_11750	C:GO:0010494; P:GO:0010603; P:GO:0034063	C:cytoplasmic stress granule; P:regulation of cytoplasmic mRNA processing body assembly; P:stress granule assembly	.	.	.	232.975	-0.724215	0.471351	-1.53647	0.124424	0.187553	232.975	0.306233	0.473823	0.646302	0.518084	0.611996	232.975	-0.856978	0.471124	-1.81901	0.06891	0.122933	148.97	201.52	82.75	252.44	320.35	385.69	98.59	130.33	245.66	248.99	224.48	588.72
Am_HQ_11753	F:GO:0005351; C:GO:0005887; P:GO:0034219; P:GO:1902600	F:carbohydrate:proton symporter activity; C:integral component of plasma membrane; P:carbohydrate transmembrane transport; P:proton transmembrane transport	.	.	.	774.984	-0.0165774	0.462574	-0.0358373	0.971412	0.980553	774.984	-0.230582	0.462438	-0.498623	0.618045	0.704143	774.984	-0.669855	0.462182	-1.44933	0.147245	0.232632	178.25	1048.37	442.72	614.96	748.16	777.09	705.32	846.8	919.54	969.21	982.57	1448.92
Am_HQ_64855	F:GO:0004805; P:GO:0005982; P:GO:0005985; P:GO:0005992; P:GO:0016311	F:trehalose-phosphatase activity; P:starch metabolic process; P:sucrose metabolic process; P:trehalose biosynthetic process; P:dephosphorylation	K01087	otsB; trehalose 6-phosphate phosphatase [EC:3.1.3.12]	A 9100 Metabolism; B 09101 Carbohydrate metabolism; C 00500 Starch and sucrose metabolism [PATH:ko00500]	129.603	4.37817	0.834174	5.24852	1.5333e-07	7.69541e-07	129.603	2.72256	0.821435	3.3144	0.000918415	0.00240122	129.603	7.27674	0.945481	7.69633	1.40025e-14	3.5938e-13	226.84	260.83	560.61	8.89	30.89	28.07	56.4	94.14	60.9	0	9.06	0
Am_HQ_11760	C:GO:0000139; P:GO:0005982; P:GO:0005985; P:GO:0009117; P:GO:0045489; F:GO:0047262; P:GO:0071555	C:Golgi membrane; P:starch metabolic process; P:sucrose metabolic process; P:nucleotide metabolic process; P:pectin biosynthetic process; F:polygalacturonate 4-alpha-galacturonosyltransferase activity; P:cell wall organization	K13648	GAUT; alpha-1,4-galacturonosyltransferase [EC:2.4.1.43]	A 9100 Metabolism; B 09101 Carbohydrate metabolism; C 00520 Amino sugar and nucleotide sugar metabolism [PATH:ko00520]	160.371	-1.25355	0.404766	-3.09696	0.00195515	0.00474726	160.371	-0.778664	0.406117	-1.91734	0.0551947	0.0920591	160.371	-0.440834	0.407232	-1.08251	0.279025	0.390927	124.95	57.28	52.48	278.21	191.45	305.46	149.98	201.13	203.09	145.74	139.04	156.7
Am_HQ_90146	F:GO:0005504; P:GO:0009627; C:GO:0016020	F:fatty acid binding; P:systemic acquired resistance; C:membrane	.	.	.	353.641	12.3675	1.76385	7.01164	2.35547e-12	2.22346e-11	353.641	6.75156	1.34218	5.03028	4.89761e-07	2.43426e-06	353.641	0.816338	1.31333	0.621579	0.534219	0.647402	543	1575	165	0	0	0	6	16	5	1536	69	30
Am_HQ_90128	C:GO:0016021	C:integral component of membrane	.	.	.	3536.87	11.8369	0.989946	11.9571	5.95949e-33	3.29232e-31	3536.87	7.82492	0.907097	8.62634	6.33492e-18	1.47047e-16	3536.87	7.16916	0.904902	7.92259	2.32618e-15	6.57338e-14	22869.4	6900.52	2276.89	2	9.75	0	89.58	57.13	45.43	138.04	75.86	104.38
Am_HQ_86383	C:GO:0009535; C:GO:0016021	C:chloroplast thylakoid membrane; C:integral component of membrane	K03542	psbS; photosystem II 22kDa protein	A 9100 Metabolism; B 09102 Energy metabolism; C 00195 Photosynthesis [PATH:ko00195]	2470.11	-14.117	1.22292	-11.5436	7.94954e-31	3.8951e-29	2470.11	-11.8212	1.22306	-9.6653	4.23374e-22	1.56975e-20	2470.11	-9.971	1.22348	-8.14972	3.64776e-16	1.15484e-14	0	1	0	9425.99	6416.09	9739.84	1006.82	1821.51	2481.32	434.69	386.26	638.3
Am_HQ_11785	F:GO:0000175; C:GO:0000178; F:GO:0003723; F:GO:0008859; P:GO:0051252; P:GO:0090503	F:3'-5'-exoribonuclease activity; C:exosome (RNase complex); F:RNA binding; F:exoribonuclease II activity; P:regulation of RNA metabolic process; P:RNA phosphodiester bond hydrolysis, exonucleolytic	K01147	rnb; exoribonuclease II [EC:3.1.13.1]	None	212.189	-0.0308013	0.340768	-0.0903881	0.927979	0.950474	212.189	0.626459	0.342869	1.82711	0.0676837	0.10979	212.189	0.729867	0.343167	2.12686	0.0334317	0.0664125	288	147	179	311	237	314	166	174	203	181	140	192
Am_HQ_11786	F:GO:0004693; F:GO:0005524; C:GO:0005634; P:GO:0006468; P:GO:0009069; P:GO:0051726; P:GO:0051726	F:cyclin-dependent protein serine/threonine kinase activity; F:ATP binding; C:nucleus; P:protein phosphorylation; P:serine family amino acid metabolic process; P:regulation of cell cycle; P:regulation of cell cycle	K08818	CDC2L; cell division cycle 2-like [EC:2.7.11.22]	None	360.01	0.983232	1.14536	0.858449	0.390645	0.488483	360.01	1.63248	1.1459	1.42463	0.154263	0.223593	360.01	0.844966	1.14527	0.73779	0.460642	0.578696	742.67	640.06	65.03	502.59	389.8	53.9	228	337.23	45.13	593.53	459.75	27.54
Am_HQ_49746	F:GO:0000978; F:GO:0003700; C:GO:0005634; C:GO:0005667; P:GO:0006355; P:GO:0061408	F:RNA polymerase II cis-regulatory region sequence-specific DNA binding; F:DNA-binding transcription factor activity; C:nucleus; C:transcription regulator complex; P:regulation of transcription, DNA-templated; P:positive regulation of transcription from RNA polymerase II promoter in response to heat stress	K09419	HSFF; heat shock transcription factor, other eukaryote	None	120.201	-10.0638	2.49948	-4.02635	5.66482e-05	0.000188611	120.201	-5.7843	2.50932	-2.30512	0.0211596	0.0396628	120.201	-9.96073	2.49951	-3.98507	6.74613e-05	0.000281328	0	0	0	0	591.48	188.83	28.23	0	8.97	24.79	688.84	14.95
Am_HQ_1180	.	.	.	.	.	1330.08	-1.0084	0.319949	-3.15175	0.00162294	0.0040179	1330.08	-0.247877	0.320299	-0.773893	0.438994	0.535045	1330.08	-0.0605737	0.320395	-0.189059	0.850046	0.902261	979.09	924.15	550.01	2094.88	2668.42	1798.22	896.15	1480	1586.04	1340.65	1118.7	998.3
Am_HQ_76214	.	.	.	.	.	178.195	8.63099	0.97082	8.8904	6.08866e-19	1.15392e-17	178.195	8.88451	1.00731	8.82008	1.1438e-18	2.88866e-17	178.195	7.16871	0.843908	8.49466	1.98516e-17	7.29918e-16	383	1164	245	1	0	5	0	1	4	6	6	4
Am_HQ_11806	F:GO:0003777; F:GO:0005524; C:GO:0005871; C:GO:0005874; P:GO:0007018; F:GO:0008017; F:GO:0016887; P:GO:0032886; C:GO:0045298; P:GO:0048364	F:microtubule motor activity; F:ATP binding; C:kinesin complex; C:microtubule; P:microtubule-based movement; F:microtubule binding; F:ATP hydrolysis activity; P:regulation of microtubule-based process; C:tubulin complex; P:root development	.	.	.	177.383	0.0513587	0.281457	0.182474	0.855211	0.896086	177.383	0.0715529	0.281621	0.254076	0.799437	0.853098	177.383	-0.219471	0.280235	-0.783166	0.43353	0.552539	98	210	125	202	180	159	168	174	192	223	186	256
Am_HQ_11808	F:GO:0003677; P:GO:0007165; F:GO:0043531	F:DNA binding; P:signal transduction; F:ADP binding	.	.	.	71.1774	-2.43947	1.88315	-1.29542	0.195175	0.274206	71.1774	-1.23097	1.8847	-0.653137	0.513668	0.608027	71.1774	-0.842789	1.88547	-0.446992	0.654881	0.753181	28.9	37.15	0	62.69	228.36	189.43	0	93.4	127.22	0	100.1	59
Am_HQ_13608	.	.	.	.	.	137.101	4.43318	2.02178	2.19271	0.0283283	0.0518465	137.101	6.70669	2.05634	3.26147	0.00110837	0.00283876	137.101	1.39652	2.01387	0.693448	0.488028	0.604984	16.27	499.97	466.16	54.21	0	0	0	0	12.82	276.18	69.24	128.47
Am_HQ_65739	F:GO:0016301; P:GO:0016310	F:kinase activity; P:phosphorylation	.	.	.	87.1531	10.0288	1.52507	6.576	4.83259e-11	3.86782e-10	87.1531	9.10095	1.40071	6.49736	8.17392e-11	7.41491e-10	87.1531	7.16066	1.09609	6.53294	6.44911e-11	9.23606e-10	64	507	316	0	0	1	1	1	0	0	3	5
Am_HQ_89882	C:GO:0016021; C:GO:0048046	C:integral component of membrane; C:apoplast	.	.	.	931.24	-8.68005	1.58988	-5.45956	4.77314e-08	2.58332e-07	931.24	-12.7828	1.58883	-8.04544	8.59393e-16	1.53772e-14	931.24	-9.94037	1.58923	-6.25485	3.97896e-10	5.02727e-09	1	0	0	72	439	58	3615	2040	4333	74	1184	148
Am_HQ_11832	F:GO:0003924; F:GO:0005525; C:GO:0005634; P:GO:0006913; P:GO:0015031	F:GTPase activity; F:GTP binding; C:nucleus; P:nucleocytoplasmic transport; P:protein transport	K07936	RAN; GTP-binding nuclear protein Ran	A 9120 Genetic Information Processing; B 09122 Translation; C 03013 Nucleocytoplasmic transport [PATH:ko03013]|A 9120 Genetic Information Processing; B 09122 Translation; C 03008 Ribosome biogenesis in eukaryotes [PATH:ko03008]|A 9160 Human Diseases; B 09172 Infectious disease: viral; C 05166 Human T-cell leukemia virus 1 infection [PATH:ko05166]	326.897	1.42888	1.59684	0.89482	0.370883	0.468089	326.897	0.126699	1.59614	0.0793782	0.936732	0.954616	326.897	0.864814	1.59645	0.541711	0.588018	0.695016	473.59	5.05	590.36	262.47	4.06	305.24	756.26	9.06	535.6	354.65	10.34	474.08
Am_HQ_26578	F:GO:0003723; F:GO:0005524; C:GO:0016021; F:GO:0016887	F:RNA binding; F:ATP binding; C:integral component of membrane; F:ATP hydrolysis activity	.	.	.	419.16	-12.0017	1.43561	-8.36004	6.26994e-17	9.79866e-16	419.16	-11.1804	1.4358	-7.78687	6.86892e-15	1.09595e-13	419.16	-9.93601	1.43636	-6.91747	4.59774e-12	7.85775e-11	0	0	0	659.31	595.76	1891.07	99.83	310.94	1423.19	233.36	217.07	279.27
Am_HQ_37832	.	.	.	.	.	255.559	8.51252	0.761514	11.1784	5.20148e-29	2.24936e-27	255.559	9.37587	0.87856	10.6719	1.3784e-26	7.95297e-25	255.559	7.11589	0.660173	10.7788	4.33395e-27	4.56055e-25	1002	419	968	3	3	3	1	0	4	3	10	11
Am_HQ_89543	P:GO:0006952	P:defense response	.	.	.	1034.12	-10.2732	1.47878	-6.94706	3.72977e-12	3.44136e-11	1034.12	-12.8065	1.47846	-8.6621	4.63157e-18	1.0923e-16	1034.12	-9.92349	1.47889	-6.7101	1.94492e-11	3.02454e-10	0	0	1	345	1143	235	3844.86	2697	3518.62	669.79	659	52
Am_HQ_11837	.	.	.	.	.	492.801	0.84707	0.24403	3.47117	0.000518195	0.00142408	492.801	0.197683	0.242688	0.814555	0.415327	0.511332	492.801	0.504488	0.243204	2.07435	0.0380473	0.0738877	410.04	461.6	661.58	368.21	340.25	433.8	481.13	692.37	609.1	439.32	593.42	418.5
Am_HQ_22435	C:GO:0016021	C:integral component of membrane	.	.	.	375.174	-12.3805	1.3169	-9.40128	5.3904e-21	1.24599e-19	375.174	-8.39782	1.31992	-6.36238	1.98647e-10	1.68965e-09	375.174	-9.89969	1.31781	-7.51221	5.81375e-14	1.35806e-12	0	0	0	1380.18	979.14	1597.64	19.39	80.71	162.27	212.45	226.32	273.41
Am_HQ_11857	P:GO:0006508; F:GO:0008234	P:proteolysis; F:cysteine-type peptidase activity	K08596	SENP7; sentrin-specific protease 7 [EC:3.4.22.68]	None	569.03	-0.285057	0.211096	-1.35037	0.176898	0.252265	569.03	0.164648	0.211999	0.776643	0.43737	0.53344	569.03	-0.315425	0.211022	-1.49475	0.134979	0.216535	352.88	608.46	333.46	689.87	655.59	723.86	437.58	544.86	527.22	602.39	717.12	818.15
Am_HQ_48635	F:GO:0003962; P:GO:0006555; P:GO:0019346; F:GO:0030170	F:cystathionine gamma-synthase activity; P:methionine metabolic process; P:transsulfuration; F:pyridoxal phosphate binding	K01739	metB; cystathionine gamma-synthase [EC:2.5.1.48]	A 9100 Metabolism; B 09102 Energy metabolism; C 00920 Sulfur metabolism [PATH:ko00920]|A 9100 Metabolism; B 09105 Amino acid metabolism; C 00270 Cysteine and methionine metabolism [PATH:ko00270]|A 9100 Metabolism; B 09106 Metabolism of other amino acids; C 00450 Selenocompound metabolism [PATH:ko00450]	750.25	-5.34029	0.697287	-7.65867	1.87871e-14	2.26244e-13	750.25	-6.26876	0.695398	-9.01463	1.97534e-19	5.50456e-18	750.25	-9.8816	0.693426	-14.2504	4.45719e-46	1.79082e-43	0	4.47	2.67	176.62	78.5	114.11	253.6	285.1	150.65	2957.73	3103.78	2657.39
Am_HQ_11872	F:GO:0004753; C:GO:0005737; C:GO:0016021; P:GO:0019878	F:saccharopine dehydrogenase activity; C:cytoplasm; C:integral component of membrane; P:lysine biosynthetic process via aminoadipic acid	K14157	AASS; alpha-aminoadipic semialdehyde synthase [EC:1.5.1.8 1.5.1.9]	A 9100 Metabolism; B 09105 Amino acid metabolism; C 00310 Lysine degradation [PATH:ko00310]	663.984	0.637968	1.33647	0.477351	0.633112	0.716653	663.984	-0.165755	1.33627	-0.124043	0.901281	0.929679	663.984	0.640716	1.33647	0.479409	0.631648	0.733289	266.75	20.84	1587.93	223.34	91.2	1446.74	1279.26	101.57	1389.18	959.41	56.99	624.5
Am_HQ_54875	F:GO:0016491	F:oxidoreductase activity	.	.	.	482.126	4.29436	0.746267	5.75445	8.69219e-09	5.23521e-08	482.126	1.46836	0.74092	1.9818	0.0475016	0.0808511	482.126	7.09403	0.782006	9.07159	1.17293e-19	5.59817e-18	2004.01	485.54	631.79	50.79	36.64	146.65	278.46	468.48	901.84	4.26	8.97	19.56
Am_HQ_11886	.	.	.	.	.	379.505	0.070726	0.481308	0.146945	0.883175	0.917167	379.505	-0.575756	0.48042	-1.19844	0.230744	0.314286	379.505	-0.985825	0.479994	-2.05383	0.0399925	0.0771771	97.04	198.33	397.44	358.28	210.34	296.28	405.14	362.85	587.73	812.27	468.34	530.75
Am_HQ_11897	F:GO:0003774; F:GO:0003917; F:GO:0005524; P:GO:0006265; P:GO:0007015; C:GO:0016459; F:GO:0051015	F:cytoskeletal motor activity; F:DNA topoisomerase type I (single strand cut, ATP-independent) activity; F:ATP binding; P:DNA topological change; P:actin filament organization; C:myosin complex; F:actin filament binding	K10357	MYO5; myosin V	A 9160 Human Diseases; B 09171 Infectious disease: bacterial; C 05130 Pathogenic Escherichia coli infection [PATH:ko05130]	130.95	-1.34298	0.407359	-3.2968	0.000977925	0.00253611	130.95	-0.179205	0.411547	-0.435443	0.663241	0.74273	130.95	0.0657784	0.412751	0.159366	0.873381	0.917909	67.54	108.72	52.75	247.68	197.25	331.58	110.51	100.43	128.74	47.81	124.4	121.12
Am_HQ_88298	C:GO:0016020	C:membrane	K22418	HSD1; 11beta/17beta-hydroxysteroid dehydrogenase [EC:1.1.1.146 1.1.1.-]	None	71.0036	-7.34418	1.33663	-5.49455	3.91701e-08	2.14838e-07	71.0036	-7.28102	1.33699	-5.44584	5.15622e-08	3.00718e-07	71.0036	-9.86895	1.33122	-7.41347	1.23035e-13	2.72701e-12	0	0	0	24	47	50	58	23	28	137	208	356
Am_HQ_7248	C:GO:0005802; C:GO:0005886; P:GO:0005982; P:GO:0005985; P:GO:0006011; P:GO:0009833; C:GO:0016021; F:GO:0016760; P:GO:0030244; F:GO:0046872; P:GO:0071555	C:trans-Golgi network; C:plasma membrane; P:starch metabolic process; P:sucrose metabolic process; P:UDP-glucose metabolic process; P:plant-type primary cell wall biogenesis; C:integral component of membrane; F:cellulose synthase (UDP-forming) activity; P:cellulose biosynthetic process; F:metal ion binding; P:cell wall organization	K10999	CESA; cellulose synthase A [EC:2.4.1.12]	None	86.1015	-7.24386	1.8268	-3.96533	7.32951e-05	0.000238679	86.1015	-8.82499	1.82341	-4.83984	1.29946e-06	6.03141e-06	86.1015	-9.8377	1.82252	-5.39787	6.74372e-08	5.61926e-07	0	0	0	55.22	7.12	51.02	124.3	8.38	201.16	391.69	6.7	281.94
Am_HQ_37450	C:GO:0009522; C:GO:0009523; C:GO:0009535; P:GO:0009765; C:GO:0016021; F:GO:0016168; P:GO:0018298; F:GO:0046872	C:photosystem I; C:photosystem II; C:chloroplast thylakoid membrane; P:photosynthesis, light harvesting; C:integral component of membrane; F:chlorophyll binding; P:protein-chromophore linkage; F:metal ion binding	K08910	LHCA4; light-harvesting complex I chlorophyll a/b binding protein 4	A 9100 Metabolism; B 09102 Energy metabolism; C 00196 Photosynthesis - antenna proteins [PATH:ko00196]	218.885	-10.8757	1.20616	-9.01687	1.93539e-19	3.85995e-18	218.885	-10.0759	1.20663	-8.35043	6.80136e-17	1.38906e-15	218.885	-9.82594	1.20681	-8.14207	3.88569e-16	1.22316e-14	0	0	0	347.22	452.41	602.97	224.26	228.76	344.14	197.45	208.97	270.5
Am_HQ_11921	.	.	.	.	.	543.781	-2.19242	0.444106	-4.93671	7.94513e-07	3.61266e-06	543.781	-0.323529	0.445811	-0.725707	0.468018	0.563059	543.781	-0.937222	0.44497	-2.10626	0.0351821	0.0692301	197.99	340.55	79.36	1522.78	839.64	1335.67	265.73	364.15	385.5	525.12	585.46	448.3
Am_HQ_70286	P:GO:0006855; F:GO:0015297; C:GO:0016021; F:GO:0042910	P:xenobiotic transmembrane transport; F:antiporter activity; C:integral component of membrane; F:xenobiotic transmembrane transporter activity	K03327	TC.MATE, SLC47A, norM, mdtK, dinF; multidrug resistance protein, MATE family	None	298.758	8.37122	1.21215	6.9061	4.98159e-12	4.53577e-11	298.758	7.29692	1.17274	6.22212	4.90487e-10	3.96734e-09	298.758	7.0858	1.16707	6.07143	1.26778e-09	1.46218e-08	1442.14	1361.12	28.06	3.56	0	8.03	7.49	12.16	4.98	17.49	7.79	2.7
Am_HQ_11929	C:GO:0005829; C:GO:0005886; P:GO:0006508; F:GO:0008270; F:GO:0010013; F:GO:0042277; P:GO:0043171; F:GO:0070006	C:cytosol; C:plasma membrane; P:proteolysis; F:zinc ion binding; F:N-1-naphthylphthalamic acid binding; F:peptide binding; P:peptide catabolic process; F:metalloaminopeptidase activity	K08776	NPEPPS; puromycin-sensitive aminopeptidase [EC:3.4.11.14]	None	1312.95	0.60439	0.269334	2.24402	0.0248312	0.0461963	1312.95	-0.240662	0.268755	-0.89547	0.370536	0.465286	1312.95	0.0147075	0.268881	0.0546989	0.956378	0.97662	768.42	1137.75	1466.14	765.07	1026.89	1162.98	1422.17	1959.24	1888.71	1080.02	1469.03	1923.58
Am_HQ_62104	F:GO:0005506; C:GO:0005737; P:GO:0019310; F:GO:0050113	F:iron ion binding; C:cytoplasm; P:inositol catabolic process; F:inositol oxygenase activity	K00469	MIOX; inositol oxygenase [EC:1.13.99.1]	A 9100 Metabolism; B 09101 Carbohydrate metabolism; C 00053 Ascorbate and aldarate metabolism [PATH:ko00053]|A 9100 Metabolism; B 09101 Carbohydrate metabolism; C 00562 Inositol phosphate metabolism [PATH:ko00562]	102.38	3.69578	2.02191	1.82787	0.0675695	0.111288	102.38	-0.45079	2.01026	-0.224244	0.822567	0.8703	102.38	7.07841	2.1336	3.31759	0.000907991	0.0028524	100.33	280.24	43.75	3	36.52	0	317.33	384.6	0	0	4	0
Am_HQ_11931	F:GO:0003724; F:GO:0003729; F:GO:0003743; F:GO:0005524; C:GO:0005730; C:GO:0005840; P:GO:0006446; F:GO:0016787; C:GO:0071013	F:RNA helicase activity; F:mRNA binding; F:translation initiation factor activity; F:ATP binding; C:nucleolus; C:ribosome; P:regulation of translational initiation; F:hydrolase activity; C:catalytic step 2 spliceosome	K13025	EIF4A3, FAL1; ATP-dependent RNA helicase [EC:3.6.4.13]	A 9120 Genetic Information Processing; B 09121 Transcription; C 03040 Spliceosome [PATH:ko03040]|A 9120 Genetic Information Processing; B 09122 Translation; C 03013 Nucleocytoplasmic transport [PATH:ko03013]|A 9120 Genetic Information Processing; B 09122 Translation; C 03015 mRNA surveillance pathway [PATH:ko03015]	359.405	0.331255	2.44096	0.135707	0.892053	0.924389	359.405	1.4326	2.44133	0.586812	0.55733	0.648792	359.405	0.864883	2.4411	0.354301	0.723113	0.807202	638.11	0	578	407.02	4.07	1039.34	76.03	0	605.77	284.78	1.89	684.53
Am_HQ_57742	F:GO:0005506; C:GO:0016021; F:GO:0020037; F:GO:0102934	F:iron ion binding; C:integral component of membrane; F:heme binding; F:costunolide synthase activity	.	.	.	356.931	-12.0358	1.24947	-9.63271	5.8177e-22	1.4794e-20	356.931	-10.2309	1.25015	-8.18371	2.75244e-16	5.2209e-15	356.931	-9.81687	1.25045	-7.8507	4.13722e-15	1.13009e-13	0	0	0	1109.22	845.83	1144.05	168.27	308.64	429.34	300.63	125.31	244.06
Am_HQ_67580	F:GO:0005515; P:GO:0006006; P:GO:0006096; C:GO:0009507; P:GO:0015976; P:GO:0019253; F:GO:0047100; F:GO:0050661; F:GO:0051287	F:protein binding; P:glucose metabolic process; P:glycolytic process; C:chloroplast; P:carbon utilization; P:reductive pentose-phosphate cycle; F:glyceraldehyde-3-phosphate dehydrogenase (NADP+) (phosphorylating) activity; F:NADP binding; F:NAD binding	K05298	GAPA; glyceraldehyde-3-phosphate dehydrogenase (NADP+) (phosphorylating) [EC:1.2.1.13]	A 9100 Metabolism; B 09102 Energy metabolism; C 00710 Carbon fixation in photosynthetic organisms [PATH:ko00710]	4692.7	-12.0411	0.667783	-18.0314	1.10399e-72	4.603e-70	4692.7	-10.629	0.667852	-15.9153	4.96646e-57	2.61307e-54	4692.7	-9.79597	0.667933	-14.6661	1.06288e-48	5.10599e-46	0	7	0	12396.3	9873.69	16635.6	3413.6	4374.53	6872.93	2374.72	1940.73	3922.09
Am_HQ_72204	P:GO:0009686; P:GO:0045487; F:GO:0046872; F:GO:0052634	P:gibberellin biosynthetic process; P:gibberellin catabolic process; F:metal ion binding; F:C-19 gibberellin 2-beta-dioxygenase activity	K04125	GA2ox; gibberellin 2beta-dioxygenase [EC:1.14.11.13]	A 9100 Metabolism; B 09109 Metabolism of terpenoids and polyketides; C 00904 Diterpenoid biosynthesis [PATH:ko00904]	89.8832	4.66615	1.52338	3.06303	0.00219108	0.00526559	89.8832	6.56599	1.57069	4.18031	2.91113e-05	0.000105963	89.8832	3.08214	1.51169	2.03887	0.0414629	0.0797247	67.78	116.64	570.52	21.31	0	18.55	1.86	0	9.41	103.79	5.77	7.27
Am_HQ_88208	C:GO:0005886; C:GO:0015629; F:GO:0046872; F:GO:0051015; P:GO:0051017	C:plasma membrane; C:actin cytoskeleton; F:metal ion binding; F:actin filament binding; P:actin filament bundle assembly	K09377	CSRP; cysteine and glycine-rich protein	None	305.682	-5.6368	4.14812	-1.35888	0.174185	0.249022	305.682	-12.3843	4.14132	-2.99042	0.0027859	0.00650015	305.682	0	4.30552	0	1	1	0	0	0	0	35	0	2630	532	405	0	0	0
Am_HQ_54954	P:GO:0006855; F:GO:0015297; C:GO:0016021; F:GO:0042910	P:xenobiotic transmembrane transport; F:antiporter activity; C:integral component of membrane; F:xenobiotic transmembrane transporter activity	K03327	TC.MATE, SLC47A, norM, mdtK, dinF; multidrug resistance protein, MATE family	None	202.938	12.1904	1.24449	9.79551	1.17698e-22	3.1526e-21	202.938	5.98967	0.46143	12.9807	1.57501e-38	2.46841e-36	202.938	7.02024	0.514877	13.6348	2.48669e-42	7.73957e-40	486.43	746.96	721.24	0	0	0	9.47	12.33	20	2.97	12.09	5.16
Am_HQ_15014	C:GO:0005794; C:GO:0016021; F:GO:0016413; P:GO:0042967	C:Golgi apparatus; C:integral component of membrane; F:O-acetyltransferase activity; P:obsolete acyl-carrier-protein biosynthetic process	.	.	.	377.729	3.76443	1.20822	3.11569	0.00183514	0.00448247	377.729	6.50222	1.22735	5.29776	1.17235e-07	6.43003e-07	377.729	1.63124	1.20561	1.35304	0.176042	0.26903	1374.7	726.18	425.98	144.84	19.43	92.13	0	31.84	8.5	934.93	86.71	95.45
Am_HQ_11945	P:GO:0006631; P:GO:0046394; F:GO:0051213	P:fatty acid metabolic process; P:carboxylic acid biosynthetic process; F:dioxygenase activity	K15718	LOX1_5; linoleate 9S-lipoxygenase [EC:1.13.11.58]	A 9100 Metabolism; B 09103 Lipid metabolism; C 00591 Linoleic acid metabolism [PATH:ko00591]	142.674	2.49499	1.43051	1.74413	0.081137	0.130246	142.674	-1.31912	1.40629	-0.938015	0.348237	0.442617	142.674	-3.00002	1.40498	-2.13528	0.0327384	0.0651935	62	51	4	0	27	0	43	141	231	639	450.13	178
Am_HQ_18096	P:GO:0006633; F:GO:0016702; P:GO:0031408; F:GO:0046872	P:fatty acid biosynthetic process; F:oxidoreductase activity, acting on single donors with incorporation of molecular oxygen, incorporation of two atoms of oxygen; P:oxylipin biosynthetic process; F:metal ion binding	K15718	LOX1_5; linoleate 9S-lipoxygenase [EC:1.13.11.58]	A 9100 Metabolism; B 09103 Lipid metabolism; C 00591 Linoleic acid metabolism [PATH:ko00591]	9489.77	-9.32677	2.29337	-4.06684	4.76549e-05	0.000161046	9489.77	-12.3978	2.29333	-5.40601	6.44449e-08	3.68939e-07	9489.77	-9.79256	2.29336	-4.26996	1.95505e-05	9.29491e-05	12.32	0	0	8771.48	27	2305.67	27971	62.86	70134.9	4685.28	81.91	11480.2
Am_HQ_72310	.	.	.	.	.	29.6052	2.13058	1.85789	1.14677	0.251475	0.339364	29.6052	6.47899	2.17824	2.97441	0.00293551	0.0068204	29.6052	-1.45703	1.83438	-0.794286	0.427029	0.546276	26.63	47.23	0	6.79	13.76	0	0	1	0	80.31	178.05	4.76
Am_HQ_18447	F:GO:0003746; F:GO:0003924; F:GO:0005525; C:GO:0005840; P:GO:0006448	F:translation elongation factor activity; F:GTPase activity; F:GTP binding; C:ribosome; P:regulation of translational elongation	K03234	EEF2; elongation factor 2	A 9130 Environmental Information Processing; B 09132 Signal transduction; C 04152 AMPK signaling pathway [PATH:ko04152]|A 9150 Organismal Systems; B 09152 Endocrine system; C 04921 Oxytocin signaling pathway [PATH:ko04921]	288.221	-6.69083	2.77843	-2.40813	0.0160343	0.031287	288.221	-12.2834	2.77359	-4.42868	9.48113e-06	3.77843e-05	288.221	0	3.01327	0	1	1	0	0	0	0	35	44	2653	333	295	0	0	0
Am_HQ_86129	C:GO:0016021	C:integral component of membrane	.	.	.	942.152	-5.14753	2.98412	-1.72498	0.0845318	0.134989	942.152	-12.2757	2.98012	-4.11921	3.80175e-05	0.000134979	942.152	0.287678	3.14785	0.0913887	0.927184	0.956934	0	2	0	0	83	0	8094	1740	1180	0	2	0
Am_HQ_69498	F:GO:0004190; P:GO:0006508; P:GO:0030163	F:aspartic-type endopeptidase activity; P:proteolysis; P:protein catabolic process	.	.	.	10788.6	8.63448	0.845479	10.2125	1.74241e-24	5.54808e-23	10788.6	3.31001	0.841683	3.93261	8.40287e-05	0.000278141	10788.6	7.01248	0.842838	8.32008	8.7906e-17	3.01638e-15	5246	10866	79300	89	81	154	1376	3936	8058	284	222	488
Am_HQ_11978	F:GO:0000049; F:GO:0004824; F:GO:0005524; C:GO:0005829; P:GO:0006430; P:GO:0009085	F:tRNA binding; F:lysine-tRNA ligase activity; F:ATP binding; C:cytosol; P:lysyl-tRNA aminoacylation; P:lysine biosynthetic process	K04567	KARS, lysS; lysyl-tRNA synthetase, class II [EC:6.1.1.6]	A 9120 Genetic Information Processing; B 09122 Translation; C 00970 Aminoacyl-tRNA biosynthesis [PATH:ko00970]	706.937	0.609107	0.267229	2.27935	0.0226466	0.0425584	706.937	0.0623565	0.266535	0.233953	0.815022	0.865021	706.937	0.223143	0.266683	0.836735	0.402741	0.522287	769.63	521.11	659.21	548	510	690.31	883	700.87	916.27	654.13	724.77	915.9
Am_HQ_11979	.	.	.	.	.	99.2195	-0.95495	0.391616	-2.43848	0.0147491	0.0290511	99.2195	-0.0485616	0.396889	-0.122356	0.902617	0.930623	99.2195	-0.688573	0.392748	-1.75322	0.0795647	0.138617	41.91	78.86	54.66	144.66	143.69	159.35	97.54	51.69	82.9	153.51	134.19	84.64
Am_HQ_11981	P:GO:0006623; F:GO:0032266; C:GO:0033565; F:GO:0043130; P:GO:0043328; F:GO:0046872	P:protein targeting to vacuole; F:phosphatidylinositol-3-phosphate binding; C:ESCRT-0 complex; F:ubiquitin binding; P:protein transport to vacuole involved in ubiquitin-dependent protein catabolic process via the multivesicular body sorting pathway; F:metal ion binding	.	.	.	122.851	0.0563555	1.4895	0.0378353	0.969819	0.979422	122.851	-0.618242	1.48873	-0.415281	0.677936	0.755397	122.851	-0.0868543	1.48928	-0.0583197	0.953494	0.97462	69.43	200.56	4.53	86.84	229.03	4.54	200.13	307.6	6.72	108.84	253.48	6.93
Am_HQ_4475	C:GO:0005887; P:GO:0055085	C:integral component of plasma membrane; P:transmembrane transport	K23677	SPNS; MFS transporter, Spinster family, sphingosine-1-phosphate transporter	None	229.329	8.37597	0.731535	11.4499	2.35541e-30	1.10275e-28	229.329	6.85253	0.617988	11.0885	1.42728e-28	9.79505e-27	229.329	7.01013	0.62443	11.2265	3.0238e-29	3.9076e-27	999.76	577.46	556.79	2.19	1.09	5.59	10.46	4.37	11.08	3.42	9.07	11.11
Am_HQ_11985	F:GO:0004675; F:GO:0005524; C:GO:0005794; C:GO:0005886; P:GO:0006468; P:GO:0007178; P:GO:0009069; C:GO:0009506; C:GO:0016021	F:transmembrane receptor protein serine/threonine kinase activity; F:ATP binding; C:Golgi apparatus; C:plasma membrane; P:protein phosphorylation; P:transmembrane receptor protein serine/threonine kinase signaling pathway; P:serine family amino acid metabolic process; C:plasmodesma; C:integral component of membrane	.	.	.	275.387	1.04593	0.704043	1.48561	0.137383	0.20397	275.387	0.414502	0.703007	0.589614	0.55545	0.647107	275.387	-0.318851	0.702208	-0.454069	0.649779	0.748909	96	386	318	213	117	166	183	314	280	916	122	242
Am_HQ_87390	.	.	.	.	.	100.848	10.2013	2.09045	4.87993	1.06124e-06	4.73284e-06	100.848	5.1908	1.7445	2.97552	0.00292494	0.0067987	100.848	6.97757	1.78554	3.90783	9.31285e-05	0.00037506	673	217	0	1	0	0	25	5	1	5	4	1
Am_HQ_81307	C:GO:0005634; P:GO:0009416	C:nucleus; P:response to light stimulus	.	.	.	79.9144	4.62537	0.755897	6.11905	9.41332e-10	6.44011e-09	79.9144	6.34949	0.885668	7.16915	7.54654e-13	9.15779e-12	79.9144	0.32145	0.695893	0.461924	0.644136	0.744306	99	53	263	4	9	10	0	5	2	142	166	144
Am_HQ_11992	F:GO:0008568; P:GO:0009451; C:GO:0016021; F:GO:0016787; P:GO:0051013	F:microtubule-severing ATPase activity; P:RNA modification; C:integral component of membrane; F:hydrolase activity; P:microtubule severing	.	.	.	114.442	-0.317061	0.402265	-0.78819	0.430586	0.529204	114.442	0.16972	0.404799	0.419271	0.675018	0.752791	114.442	-0.318149	0.402197	-0.791028	0.428928	0.547887	86.44	121.62	48.99	154.93	119.93	148.43	50.72	124.51	133.03	147.23	154.73	123.62
Am_HQ_51310	.	.	.	.	.	84.3418	2.6894	2.53597	1.0605	0.288917	0.380967	84.3418	6.33516	2.57069	2.46438	0.0137251	0.027017	84.3418	3.76772	2.53924	1.4838	0.137862	0.220265	530.75	0	68.17	21.78	39.66	79.71	0	0	11.58	64.37	0	0
Am_HQ_58303	F:GO:0005506; C:GO:0016021; F:GO:0016709; F:GO:0020037	F:iron ion binding; C:integral component of membrane; F:oxidoreductase activity, acting on paired donors, with incorporation or reduction of molecular oxygen, NAD(P)H as one donor, and incorporation of one atom of oxygen; F:heme binding	K21995	CYP77A; cytochrome P450 family 77 subfamily A [EC:1.14.-.-]	A 9100 Metabolism; B 09103 Lipid metabolism; C 00073 Cutin, suberine and wax biosynthesis [PATH:ko00073]	544.319	-8.52261	2.5128	-3.39168	0.000694653	0.00185863	544.319	-12.269	2.51201	-4.88414	1.03884e-06	4.91043e-06	544.319	-3.15631	2.54633	-1.23955	0.21514	0.31686	0	0	1	0	466	2	2649	1997	1718	7	0	5
Am_HQ_70353	F:GO:0004650; C:GO:0005576; P:GO:0005982; P:GO:0005985; P:GO:0009901; P:GO:0010047; P:GO:0045490; P:GO:0071555	F:polygalacturonase activity; C:extracellular region; P:starch metabolic process; P:sucrose metabolic process; P:anther dehiscence; P:fruit dehiscence; P:pectin catabolic process; P:cell wall organization	K01184	E3.2.1.15; polygalacturonase [EC:3.2.1.15]	A 9100 Metabolism; B 09101 Carbohydrate metabolism; C 00040 Pentose and glucuronate interconversions [PATH:ko00040]	198.275	6.72784	1.27893	5.26054	1.43631e-07	7.24154e-07	198.275	5.22982	1.25624	4.16308	3.13989e-05	0.00011356	198.275	6.96631	1.28479	5.42213	5.88922e-08	4.99194e-07	1113	96	520	0	18	5	11	19	38	0	12	8
Am_HQ_1200	P:GO:0009987	P:cellular process	K03164	TOP2; DNA topoisomerase II [EC:5.6.2.2]	A 9160 Human Diseases; B 09176 Drug resistance: antineoplastic; C 01524 Platinum drug resistance [PATH:ko01524]	598.843	0.685338	0.981696	0.698116	0.485104	0.582347	598.843	1.31137	0.982004	1.3354	0.181745	0.257223	598.843	1.05011	0.981847	1.06953	0.284833	0.397642	1400.23	128.69	646.37	1087.78	119.58	721	565.22	157.85	486.89	802.65	114.38	597.17
Am_HQ_12001	.	.	.	.	.	133.391	0.898141	0.833178	1.07797	0.281047	0.372114	133.391	0.825393	0.833027	0.990836	0.321766	0.415206	133.391	0.426879	0.832081	0.513026	0.607933	0.712609	149.17	251.18	65.44	137.68	143.22	33.76	148.35	140.67	39.08	258.66	141.74	49.61
Am_HQ_12008	F:GO:0016616; F:GO:0051287	F:oxidoreductase activity, acting on the CH-OH group of donors, NAD or NADP as acceptor; F:NAD binding	.	.	.	140.022	-0.589992	1.66781	-0.353751	0.723525	0.792567	140.022	-1.36584	1.6672	-0.81924	0.412649	0.508634	140.022	-0.572889	1.66782	-0.343497	0.731225	0.813544	61.27	152.02	3.27	197.88	195.62	1.09	309.49	361.92	4.34	194.52	209.85	3.3
Am_HQ_8465	C:GO:0005643; P:GO:0006913; F:GO:0017056	C:nuclear pore; P:nucleocytoplasmic transport; F:structural constituent of nuclear pore	K14297	NUP98, ADAR2, NUP116; nuclear pore complex protein Nup98-Nup96	A 9120 Genetic Information Processing; B 09122 Translation; C 03013 Nucleocytoplasmic transport [PATH:ko03013]|A 9160 Human Diseases; B 09172 Infectious disease: viral; C 05164 Influenza A [PATH:ko05164]|A 9160 Human Diseases; B 09164 Neurodegenerative disease; C 05014 Amyotrophic lateral sclerosis [PATH:ko05014]	256.406	6.74371	1.62609	4.1472	3.3656e-05	0.000116902	256.406	8.91563	1.69898	5.24763	1.54067e-07	8.27359e-07	256.406	6.9616	1.62926	4.27286	1.92979e-05	9.18664e-05	757.35	210.33	1419.9	12.13	17.33	0	5.82	0	0	10.13	16.48	0
Am_HQ_12010	.	.	.	.	.	152.639	-0.430814	0.401209	-1.07379	0.282918	0.374266	152.639	-0.0782516	0.402461	-0.194433	0.845837	0.888097	152.639	-0.0690111	0.402384	-0.171505	0.863826	0.91225	169.8	90.68	62.67	182.71	179.73	241.59	153.46	166.59	144.17	150.94	161.02	158.61
Am_HQ_16124	F:GO:0004674; F:GO:0005524; C:GO:0005886; P:GO:0009069; C:GO:0009506; C:GO:0016021; P:GO:0046777	F:protein serine/threonine kinase activity; F:ATP binding; C:plasma membrane; P:serine family amino acid metabolic process; C:plasmodesma; C:integral component of membrane; P:protein autophosphorylation	.	.	.	275.406	-4.57846	1.83137	-2.50002	0.0124188	0.0249868	275.406	-12.2402	1.79888	-6.80435	1.01504e-11	1.05903e-10	275.406	0	2.1501	0	1	1	0	0	0	1	15	1	2276	603	369	0	0	0
Am_HQ_12018	F:GO:0000166; F:GO:0000175; C:GO:0000176; P:GO:0000467; F:GO:0003727; C:GO:0005730; F:GO:0033890; P:GO:0051252; P:GO:0071035; P:GO:0071036; P:GO:0071037; P:GO:0071038; P:GO:0071039; P:GO:0071040; P:GO:0071044; P:GO:0071051	F:nucleotide binding; F:3'-5'-exoribonuclease activity; C:nuclear exosome (RNase complex); P:exonucleolytic trimming to generate mature 3'-end of 5.8S rRNA from tricistronic rRNA transcript (SSU-rRNA, 5.8S rRNA, LSU-rRNA); F:single-stranded RNA binding; C:nucleolus; F:ribonuclease D activity; P:regulation of RNA metabolic process; P:nuclear polyadenylation-dependent rRNA catabolic process; P:nucl…	K12591	RRP6, EXOSC10; exosome complex exonuclease RRP6 [EC:3.1.13.-]	A 9120 Genetic Information Processing; B 09123 Folding, sorting and degradation; C 03018 RNA degradation [PATH:ko03018]	682.448	0.0813397	0.16296	0.49914	0.617681	0.703293	682.448	0.298014	0.163437	1.82341	0.0682412	0.110638	682.448	0.226695	0.163221	1.38889	0.164868	0.254808	607.46	711	525.68	704.72	695.39	940	505.49	682.62	822.77	634.5	700.03	786.33
Am_HQ_12024	.	.	.	.	.	283.121	-0.351471	0.776127	-0.452852	0.650655	0.7319	283.121	0.798355	0.777446	1.02689	0.30447	0.396709	283.121	0.208796	0.776615	0.268854	0.788042	0.856448	155.59	201.84	388.06	224.4	784.01	228.23	92.77	276.81	211.71	95.57	609.51	151.87
Am_HQ_88738	F:GO:0004364; C:GO:0005737; P:GO:0006749; P:GO:0006803	F:glutathione transferase activity; C:cytoplasm; P:glutathione metabolic process; P:obsolete glutathione conjugation reaction	K00799	GST, gst; glutathione S-transferase [EC:2.5.1.18]	A 9100 Metabolism; B 09106 Metabolism of other amino acids; C 00480 Glutathione metabolism [PATH:ko00480]|A 9100 Metabolism; B 09111 Xenobiotics biodegradation and metabolism; C 00980 Metabolism of xenobiotics by cytochrome P450 [PATH:ko00980]|A 9100 Metabolism; B 09111 Xenobiotics biodegradation and metabolism; C 00982 Drug metabolism - cytochrome P450 [PATH:ko00982]|A 9100 Metabolism; B 09111 X…	184.14	5.59903	0.697529	8.02695	9.99255e-16	1.39757e-14	184.14	1.08713	0.652758	1.66544	0.0958244	0.148557	184.14	6.95864	0.764249	9.10521	8.60998e-20	4.18161e-18	117	292	807	6	8	20	227	229	293	3	4	6
Am_HQ_46636	P:GO:0005975; F:GO:0052692	P:carbohydrate metabolic process; F:raffinose alpha-galactosidase activity	.	.	.	909.157	-3.58286	3.18445	-1.12511	0.260543	0.349573	909.157	-12.2348	3.17328	-3.85558	0.000115455	0.000370134	909.157	2.15974	3.38483	0.638064	0.523432	0.63743	0	2	0	0	28	0	7970	1662.49	1015	0	0	0
Am_HQ_58663	F:GO:0005506; C:GO:0016021; F:GO:0016709; F:GO:0020037	F:iron ion binding; C:integral component of membrane; F:oxidoreductase activity, acting on paired donors, with incorporation or reduction of molecular oxygen, NAD(P)H as one donor, and incorporation of one atom of oxygen; F:heme binding	.	.	.	85.7105	4.28989	1.93422	2.21789	0.0265624	0.0489473	85.7105	6.28345	1.96638	3.19544	0.00139619	0.00349808	85.7105	3.84299	1.93128	1.98987	0.0466056	0.087907	171.84	69.44	484.09	0	23.93	28.26	10.68	0	0	43.81	0	24.72
Am_HQ_27891	C:GO:0005802; C:GO:0005886; P:GO:0005982; P:GO:0005985; P:GO:0006011; P:GO:0009833; C:GO:0016021; F:GO:0016760; P:GO:0030244; P:GO:0071555	C:trans-Golgi network; C:plasma membrane; P:starch metabolic process; P:sucrose metabolic process; P:UDP-glucose metabolic process; P:plant-type primary cell wall biogenesis; C:integral component of membrane; F:cellulose synthase (UDP-forming) activity; P:cellulose biosynthetic process; P:cell wall organization	.	.	.	1255.63	-8.27414	0.802465	-10.3109	6.29062e-25	2.06247e-23	1255.63	-9.19166	0.802252	-11.4573	2.1608e-30	1.74268e-28	1255.63	-9.79023	0.802165	-12.2047	2.93209e-34	5.44483e-32	0	3	4	913.26	1197.51	682.23	1587.9	1627.86	2134.31	1150.04	5259.92	1728.88
Am_HQ_12043	C:GO:0000932; C:GO:0005634; P:GO:0006355; P:GO:0017148; C:GO:0030015	C:P-body; C:nucleus; P:regulation of transcription, DNA-templated; P:negative regulation of translation; C:CCR4-NOT core complex	K12580	CNOT3, NOT3; CCR4-NOT transcription complex subunit 3	A 9120 Genetic Information Processing; B 09123 Folding, sorting and degradation; C 03018 RNA degradation [PATH:ko03018]	125.959	0.144388	0.428559	0.336915	0.736181	0.802888	125.959	0.813504	0.431686	1.88448	0.0595001	0.0982319	125.959	0.55256	0.43018	1.28449	0.198972	0.297388	82.11	96.25	211.57	141.71	125.62	207.98	71.71	86.6	140.29	102.14	95.37	162.3
Am_HQ_84629	.	.	.	.	.	717.808	14.0297	1.46512	9.57581	1.01063e-21	2.5037e-20	717.808	8.20996	0.909159	9.03027	1.71248e-19	4.81454e-18	717.808	6.95785	0.887039	7.8439	4.36749e-15	1.19005e-13	807	4441	2037	0	0	0	9	12	10	2	47	26
Am_HQ_84412	F:GO:0004553; C:GO:0005618; P:GO:0010411; F:GO:0016762; P:GO:0042546; C:GO:0048046; P:GO:0071555	F:hydrolase activity, hydrolyzing O-glycosyl compounds; C:cell wall; P:xyloglucan metabolic process; F:xyloglucan:xyloglucosyl transferase activity; P:cell wall biogenesis; C:apoplast; P:cell wall organization	K14504	TCH4; xyloglucan:xyloglucosyl transferase TCH4 [EC:2.4.1.207]	A 9130 Environmental Information Processing; B 09132 Signal transduction; C 04075 Plant hormone signal transduction [PATH:ko04075]	1618.57	5.72985	1.52126	3.76652	0.00016554	0.000505401	1618.57	6.25968	1.52218	4.1123	3.91729e-05	0.000138747	1618.57	2.9104	1.51953	1.91534	0.0554496	0.102059	1571.88	2818.21	9287.05	289.06	1.56	33.58	79.66	8	149.05	2251.45	18.66	106.13
Am_HQ_12276	P:GO:0006000; P:GO:0006013; F:GO:0008928; P:GO:0009058	P:fructose metabolic process; P:mannose metabolic process; F:mannose-1-phosphate guanylyltransferase (GDP) activity; P:biosynthetic process	K00966	GMPP; mannose-1-phosphate guanylyltransferase [EC:2.7.7.13]	A 9100 Metabolism; B 09101 Carbohydrate metabolism; C 00051 Fructose and mannose metabolism [PATH:ko00051]|A 9100 Metabolism; B 09101 Carbohydrate metabolism; C 00520 Amino sugar and nucleotide sugar metabolism [PATH:ko00520]	174.947	1.1116	1.74251	0.637933	0.523517	0.61911	174.947	2.2189	1.74364	1.27257	0.20317	0.282546	174.947	6.93018	1.79433	3.86226	0.000112343	0.000443471	20.19	303.85	719.01	171.03	105.47	370.64	0	244.66	57.27	0	10.94	0
Am_HQ_12051	F:GO:0016787; F:GO:0043531	F:hydrolase activity; F:ADP binding	.	.	.	107.891	0.966456	0.965862	1.00062	0.317013	0.411209	107.891	1.40517	0.967561	1.45228	0.146425	0.213881	107.891	-0.228202	0.963244	-0.23691	0.812727	0.875013	60.41	36.17	245.4	117.39	64.38	47.91	6.76	91.57	83.09	67.59	344.72	125.75
Am_HQ_12052	F:GO:0003676; P:GO:0031047	F:nucleic acid binding; P:gene silencing by RNA	K11593	ELF2C, AGO; eukaryotic translation initiation factor 2C	A 9150 Organismal Systems; B 09158 Development and regeneration; C 04361 Axon regeneration [PATH:ko04361]	315.189	-0.195165	0.413723	-0.471729	0.63712	0.719974	315.189	0.190584	0.414489	0.459806	0.645655	0.728018	315.189	-0.520791	0.413219	-1.26033	0.207552	0.307591	267.99	313.43	109.32	306.53	404.81	336.85	203.1	286.53	320.95	278.71	476.81	581.77
Am_HQ_12053	F:GO:0004674; F:GO:0005524; P:GO:0006468; P:GO:0009069; C:GO:0016021	F:protein serine/threonine kinase activity; F:ATP binding; P:protein phosphorylation; P:serine family amino acid metabolic process; C:integral component of membrane	.	.	.	146.288	0.920548	0.401706	2.2916	0.021929	0.0413541	146.288	-0.0951897	0.397553	-0.239439	0.810765	0.861796	146.288	0.741363	0.400666	1.85033	0.0642667	0.115781	195	117	124	76	96	148	193	226	212	87	94	181
Am_HQ_12055	.	.	.	.	.	152.805	-1.17345	1.91191	-0.613759	0.539375	0.633355	152.805	-0.753323	1.91221	-0.393954	0.693615	0.768296	152.805	-1.03471	1.91199	-0.541168	0.588392	0.695309	33.72	194.6	0	198.55	408.2	1.61	73.19	402.8	3.19	166.37	409.24	1.55
Am_HQ_85323	.	.	K14488	SAUR; SAUR family protein	A 9130 Environmental Information Processing; B 09132 Signal transduction; C 04075 Plant hormone signal transduction [PATH:ko04075]	142.618	5.84212	0.562966	10.3774	3.14224e-25	1.05049e-23	142.618	6.22895	0.606291	10.2739	9.2433e-25	4.43077e-23	142.618	-0.550885	0.398012	-1.38409	0.16633	0.256709	102	240	228	6	2	5	1	4	5	344	420	332
Am_HQ_5408	P:GO:0007165; C:GO:0016020; F:GO:0043531	P:signal transduction; C:membrane; F:ADP binding	.	.	.	122.796	5.28983	2.00334	2.64051	0.00827818	0.0174154	122.796	6.18612	2.02121	3.0606	0.00220894	0.00528395	122.796	0.834906	1.98375	0.420874	0.673847	0.76871	229.6	87.54	412.61	24.01	0	0	0	0	15.28	476.72	61.32	14.72
Am_HQ_8903	.	.	.	.	.	50.9867	-4.64042	2.09352	-2.21656	0.0266532	0.04909	50.9867	0	2.3784	0	1	1	50.9867	-9.77351	2.06699	-4.72838	2.26322e-06	1.34226e-05	0	0	0	0	14.93	3.13	0	0	0	53.33	210	397.26
Am_HQ_81544	F:GO:0050285	F:sinapine esterase activity	.	.	.	104.053	8.78123	1.24169	7.072	1.52716e-12	1.48339e-11	104.053	5.82666	0.968145	6.01838	1.76172e-09	1.30377e-08	104.053	6.92616	1.01851	6.80031	1.04395e-11	1.69751e-10	47	341	630	0	2	1	13	3	6	2	3	6
Am_HQ_57078	F:GO:0004491; C:GO:0005739; P:GO:0006020; P:GO:0006210; P:GO:0006522; P:GO:0006531; P:GO:0006550; P:GO:0006552; P:GO:0006574; F:GO:0018478; P:GO:0018888; P:GO:0019482	F:methylmalonate-semialdehyde dehydrogenase (acylating) activity; C:mitochondrion; P:inositol metabolic process; P:thymine catabolic process; P:alanine metabolic process; P:aspartate metabolic process; P:isoleucine catabolic process; P:leucine catabolic process; P:valine catabolic process; F:malonate-semialdehyde dehydrogenase (acetylating) activity; P:3-chloroacrylic acid metabolic process; P:be…	K00140	mmsA, iolA, ALDH6A1; malonate-semialdehyde dehydrogenase (acetylating) / methylmalonate-semialdehyde dehydrogenase [EC:1.2.1.18 1.2.1.27]	A 9100 Metabolism; B 09101 Carbohydrate metabolism; C 00640 Propanoate metabolism [PATH:ko00640]|A 9100 Metabolism; B 09101 Carbohydrate metabolism; C 00562 Inositol phosphate metabolism [PATH:ko00562]|A 9100 Metabolism; B 09105 Amino acid metabolism; C 00280 Valine, leucine and isoleucine degradation [PATH:ko00280]|A 9100 Metabolism; B 09106 Metabolism of other amino acids; C 00410 beta-Alanine …	476.216	-5.73618	0.831374	-6.89964	5.2135e-12	4.73327e-11	476.216	-7.87946	0.827955	-9.51677	1.78643e-21	6.21678e-20	476.216	-9.77115	0.827207	-11.8122	3.37567e-32	5.36659e-30	0	0	4.46	129.31	62.17	91.25	335.25	359.33	568.41	1145.18	1393.15	2183.35
Am_HQ_12091	.	.	.	.	.	256.969	-0.4526	1.93731	-0.233624	0.815277	0.865904	256.969	4.28301	1.94757	2.19915	0.0278672	0.0505923	256.969	0.0702971	1.93747	0.0362829	0.971057	0.986412	174.76	213.83	356.2	1034.04	104.74	161.32	0	0.31	55.99	730.41	0	212.88
Am_HQ_12092	P:GO:0071249	P:cellular response to nitrate	.	.	.	149.04	1.9672	0.555056	3.54415	0.000393884	0.00111239	149.04	-0.328082	0.543436	-0.603718	0.546031	0.638322	149.04	-0.387742	0.543253	-0.713742	0.475386	0.592926	49.4	198.84	146.71	27	70.88	29.77	222.18	201.84	202.1	143.83	275.55	250.89
Am_HQ_22618	F:GO:0005315; C:GO:0005887; P:GO:0035435	F:inorganic phosphate transmembrane transporter activity; C:integral component of plasma membrane; P:phosphate ion transmembrane transport	K14640	SLC20A, PIT; solute carrier family 20 (sodium-dependent phosphate transporter)	None	120.49	-9.69409	1.28957	-7.51728	5.59261e-14	6.39015e-13	120.49	-8.79857	1.29074	-6.81669	9.31635e-12	9.79413e-11	120.49	-9.73739	1.28952	-7.55117	4.31375e-14	1.02721e-12	0	0	0	271.58	151.92	179.7	68.87	124.65	139.15	331.68	179.01	116.9
Am_HQ_12107	C:GO:0016021; P:GO:0030433; F:GO:0031593; F:GO:0051787; C:GO:0071818	C:integral component of membrane; P:ubiquitin-dependent ERAD pathway; F:polyubiquitin modification-dependent protein binding; F:misfolded protein binding; C:BAT3 complex	.	.	.	487.074	0.544093	1.24734	0.436203	0.662689	0.742	487.074	0.597721	1.24737	0.479187	0.631806	0.715725	487.074	0.648457	1.24737	0.519857	0.603163	0.708521	563.74	1019.64	43.88	554.26	777.56	55.61	438.24	870.9	51.6	410.77	891.28	41.37
Am_HQ_12114	C:GO:0005739; C:GO:0016020	C:mitochondrion; C:membrane	K03883	ND5; NADH-ubiquinone oxidoreductase chain 5 [EC:7.1.1.2]	A 9100 Metabolism; B 09102 Energy metabolism; C 00190 Oxidative phosphorylation [PATH:ko00190]|A 9150 Organismal Systems; B 09156 Nervous system; C 04723 Retrograde endocannabinoid signaling [PATH:ko04723]|A 9150 Organismal Systems; B 09159 Environmental adaptation; C 04714 Thermogenesis [PATH:ko04714]|A 9160 Human Diseases; B 09161 Cancer: overview; C 05208 Chemical carcinogenesis - reactive oxy…	104.31	0.834721	0.754698	1.10603	0.268712	0.358554	104.31	-0.872876	0.749596	-1.16446	0.244237	0.329851	104.31	0.610176	0.753571	0.809713	0.418105	0.53723	56	60	135	68	58	61	405	78	75	103	62	55
Am_HQ_68755	.	.	.	.	.	274.04	-11.6055	1.32898	-8.73263	2.48826e-18	4.47037e-17	274.04	-9.76748	1.32988	-7.34465	2.06296e-13	2.6927e-12	274.04	-9.73115	1.32988	-7.31731	2.52996e-13	5.34483e-12	0	0	0	847.68	581.18	873.6	272.14	138.54	210.95	367.79	178.38	76.68
Am_HQ_12118	P:GO:0045454	P:cell redox homeostasis	.	.	.	206.314	0.972383	0.401985	2.41895	0.0155652	0.0304956	206.314	-0.507792	0.396944	-1.27925	0.200808	0.2797	206.314	-0.27138	0.397388	-0.68291	0.494664	0.611187	90	200	206	62	161	107	288	321	304	242	222	328
Am_HQ_12120	F:GO:0003676	F:nucleic acid binding	.	.	.	917.08	-0.949281	0.483988	-1.96137	0.0498355	0.085257	917.08	-0.673077	0.484113	-1.39033	0.164429	0.236113	917.08	-0.564099	0.484152	-1.16513	0.243967	0.351446	160.87	987.85	423.13	1213.49	1205.58	1429.29	665	1183.29	1373	1193.43	840.04	921.91
Am_HQ_12129	F:GO:0003700; C:GO:0005634; C:GO:0005667; P:GO:0006355; P:GO:0006355; F:GO:0043565	F:DNA-binding transcription factor activity; C:nucleus; C:transcription regulator complex; P:regulation of transcription, DNA-templated; P:regulation of transcription, DNA-templated; F:sequence-specific DNA binding	.	.	.	91.5945	0.628167	1.25555	0.500313	NA	NA	91.5945	3.52191	1.27821	2.75536	NA	NA	91.5945	-0.609043	1.25351	-0.485871	NA	NA	53.01	66.88	155.01	167.17	25.92	35.17	0	12.16	21.52	473.83	43.15	34.56
Am_HQ_82206	.	.	.	.	.	27.0344	5.85933	1.13042	5.18332	2.1797e-07	1.07038e-06	27.0344	1.12271	0.887159	1.26551	0.205688	0.285515	27.0344	6.89275	1.34311	5.13193	2.86786e-07	2.07784e-06	49	50	78	0	4	0	25	24	62	0	2	0
Am_HQ_78246	F:GO:0010181; F:GO:0016629	F:FMN binding; F:12-oxophytodienoate reductase activity	K05894	OPR; 12-oxophytodienoic acid reductase [EC:1.3.1.42]	A 9100 Metabolism; B 09103 Lipid metabolism; C 00592 alpha-Linolenic acid metabolism [PATH:ko00592]	113.062	5.39679	0.987256	5.46646	4.59122e-08	2.49402e-07	113.062	0.348467	0.932435	0.373718	0.708614	0.780678	113.062	6.87479	1.07963	6.36775	1.91815e-10	2.54732e-09	41	559	59	7	7	5	118	189	347	3	0	4
Am_HQ_53169	P:GO:0006006; F:GO:0016620; F:GO:0050661; F:GO:0051287	P:glucose metabolic process; F:oxidoreductase activity, acting on the aldehyde or oxo group of donors, NAD or NADP as acceptor; F:NADP binding; F:NAD binding	K05298	GAPA; glyceraldehyde-3-phosphate dehydrogenase (NADP+) (phosphorylating) [EC:1.2.1.13]	A 9100 Metabolism; B 09102 Energy metabolism; C 00710 Carbon fixation in photosynthetic organisms [PATH:ko00710]	188.593	-10.4567	1.25403	-8.33849	7.52435e-17	1.16519e-15	188.593	-10.0764	1.25428	-8.03359	9.46616e-16	1.68696e-14	188.593	-9.7248	1.25455	-7.75164	9.07117e-15	2.3807e-13	0	0	0	288.36	257.41	512.03	151.46	291.42	371.18	134.76	198.53	299.21
Am_HQ_49966	P:GO:0006629; F:GO:0016787	P:lipid metabolic process; F:hydrolase activity	.	.	.	3652.1	-8.25706	1.01946	-8.09947	5.51989e-16	7.88485e-15	3652.1	-10.709	1.01929	-10.5063	8.08124e-26	4.31351e-24	3652.1	-9.71707	1.01933	-9.53281	1.53084e-21	9.19253e-20	9	1.98	1	1670.55	2707.52	591.82	7338.22	10089.2	10847.6	1511.53	11585.1	998.23
Am_HQ_12143	F:GO:0003746; F:GO:0003924; F:GO:0005525; C:GO:0005840; P:GO:0006448; F:GO:0046872	F:translation elongation factor activity; F:GTPase activity; F:GTP binding; C:ribosome; P:regulation of translational elongation; F:metal ion binding	K14416	HBS1; elongation factor 1 alpha-like protein	A 9120 Genetic Information Processing; B 09122 Translation; C 03015 mRNA surveillance pathway [PATH:ko03015]|A 9160 Human Diseases; B 09171 Infectious disease: bacterial; C 05134 Legionellosis [PATH:ko05134]	293.591	0.42125	0.322217	1.30735	0.191095	0.269226	293.591	0.225364	0.321742	0.700448	0.483647	0.578649	293.591	0.0898962	0.321358	0.279738	0.779678	0.850364	251.45	312.47	247.91	272.66	267.98	260.85	200.54	315.7	419.51	207.24	334.7	487.12
Am_HQ_59770	F:GO:0004497; F:GO:0005506; C:GO:0016021; F:GO:0016705; F:GO:0020037	F:monooxygenase activity; F:iron ion binding; C:integral component of membrane; F:oxidoreductase activity, acting on paired donors, with incorporation or reduction of molecular oxygen; F:heme binding	K00487	CYP73A; trans-cinnamate 4-monooxygenase [EC:1.14.14.91]	A 9100 Metabolism; B 09108 Metabolism of cofactors and vitamins; C 00130 Ubiquinone and other terpenoid-quinone biosynthesis [PATH:ko00130]|A 9100 Metabolism; B 09110 Biosynthesis of other secondary metabolites; C 00940 Phenylpropanoid biosynthesis [PATH:ko00940]|A 9100 Metabolism; B 09110 Biosynthesis of other secondary metabolites; C 00945 Stilbenoid, diarylheptanoid and gingerol biosynthesis […	3430.62	10.7396	0.462296	23.231	2.21656e-119	6.12268e-116	3430.62	7.1239	0.373318	19.0827	3.51849e-81	4.31953e-78	3430.62	6.86122	0.371674	18.4603	4.30715e-76	6.79853e-73	7902	13045	12391	7	6	13	90	93	132	118	67	199
Am_HQ_12155	F:GO:0005524; F:GO:0016887	F:ATP binding; F:ATP hydrolysis activity	K06184	ABCF1; ATP-binding cassette, subfamily F, member 1	None	169.295	0.611561	1.1797	0.518405	0.604176	0.691586	169.295	0.717127	1.17986	0.607807	0.543315	0.635752	169.295	0.358619	1.17938	0.304074	0.761071	0.836225	243.72	120.29	161.82	104.13	211.64	156.62	99.32	201.83	141.8	0	358.41	212.74
Am_HQ_12158	F:GO:0004842; C:GO:0005634; C:GO:0005737; P:GO:0016567; F:GO:0016746; F:GO:0016874	F:ubiquitin-protein transferase activity; C:nucleus; C:cytoplasm; P:protein ubiquitination; F:acyltransferase activity; F:ligase activity	.	.	.	670.481	0.776551	0.327555	2.37075	0.0177519	0.0342754	670.481	0.616807	0.327383	1.88405	0.0595577	0.0983064	670.481	0.655912	0.327393	2.00344	0.0451302	0.0856629	487.66	1286.87	576.78	544.56	576.14	657.65	419.4	742.06	852.18	627.52	726.28	586.24
Am_HQ_35344	C:GO:0016020	C:membrane	.	.	.	256.809	-2.50197	3.3868	-0.738742	0.460064	0.557771	256.809	-12.1446	3.31225	-3.66658	0.000245813	0.000733851	256.809	0	3.51538	0	1	1	0	0	0	0	4	0	2177	491	364	0	0	0
Am_HQ_63069	F:GO:0005351; C:GO:0005887; P:GO:0034219; P:GO:1902600	F:carbohydrate:proton symporter activity; C:integral component of plasma membrane; P:carbohydrate transmembrane transport; P:proton transmembrane transport	.	.	.	253.168	0	4.40736	0	1	1	253.168	-12.1258	4.24711	-2.85506	0.00430281	0.00960633	253.168	0	4.40736	0	1	1	0	0	0	0	0	0	2257	407	304	0	0	0
Am_HQ_1217	.	.	.	.	.	189.184	-0.259481	0.618296	-0.419671	0.674726	0.752883	189.184	0.439154	0.619732	0.708618	0.478561	0.573526	189.184	0.017798	0.618744	0.0287648	0.977052	0.990741	186.68	204.18	78.42	180.39	355.09	208.58	75.04	276.05	118.46	137.71	346.54	136.29
Am_HQ_12172	P:GO:0000160; F:GO:0003677; F:GO:0003700; C:GO:0005634; C:GO:0005667; P:GO:0006355; P:GO:0006355	P:phosphorelay signal transduction system; F:DNA binding; F:DNA-binding transcription factor activity; C:nucleus; C:transcription regulator complex; P:regulation of transcription, DNA-templated; P:regulation of transcription, DNA-templated	K14491	ARR-B; two-component response regulator ARR-B family	A 9130 Environmental Information Processing; B 09132 Signal transduction; C 04075 Plant hormone signal transduction [PATH:ko04075]	422.444	-0.8171	0.514246	-1.58893	0.112077	0.171566	422.444	-0.746494	0.514325	-1.4514	0.146667	0.214171	422.444	-0.780584	0.514265	-1.51786	0.129049	0.208612	221.77	276.28	173.01	731.93	508.6	289.13	402.54	729	352.88	702.62	563.5	262.54
Am_HQ_34807	F:GO:0003677	F:DNA binding	K13424	WRKY33; WRKY transcription factor 33	A 9130 Environmental Information Processing; B 09132 Signal transduction; C 04016 MAPK signaling pathway - plant [PATH:ko04016]|A 9150 Organismal Systems; B 09159 Environmental adaptation; C 04626 Plant-pathogen interaction [PATH:ko04626]	359.837	3.17522	0.854366	3.71646	0.000202031	0.000605189	359.837	3.74466	0.855771	4.37578	1.21e-05	4.73754e-05	359.837	6.84848	0.886489	7.7254	1.11504e-14	2.89885e-13	422.84	317.25	2187.39	153.51	71.36	218.37	111.44	74.65	100.43	25.28	1.9	7.35
Am_HQ_46060	F:GO:0005524; C:GO:0005794; C:GO:0009570; C:GO:0009941; C:GO:0010319; F:GO:0019904; C:GO:0022626; P:GO:0042026; C:GO:0048046; F:GO:0051082; P:GO:0051085	F:ATP binding; C:Golgi apparatus; C:chloroplast stroma; C:chloroplast envelope; C:stromule; F:protein domain specific binding; C:cytosolic ribosome; P:protein refolding; C:apoplast; F:unfolded protein binding; P:chaperone cofactor-dependent protein refolding	K04077	groEL, HSPD1; chaperonin GroEL	A 9120 Genetic Information Processing; B 09123 Folding, sorting and degradation; C 03018 RNA degradation [PATH:ko03018]|A 9150 Organismal Systems; B 09149 Aging; C 04212 Longevity regulating pathway - worm [PATH:ko04212]|A 9160 Human Diseases; B 09171 Infectious disease: bacterial; C 05134 Legionellosis [PATH:ko05134]|A 9160 Human Diseases; B 09171 Infectious disease: bacterial; C 05152 Tuberculo…	284.119	12.6688	2.06966	6.12121	9.28693e-10	6.35758e-09	284.119	5.70188	1.71069	3.33309	0.000858886	0.00225599	284.119	6.80534	1.72052	3.95539	7.64106e-05	0.00031467	1520.68	439.55	596.63	0	0	0	40.27	0	25.45	0	30.05	1.77
Am_HQ_61771	F:GO:0003746; F:GO:0003924; F:GO:0005525; C:GO:0005840; C:GO:0005887; P:GO:0006448; F:GO:0022857; P:GO:0055085	F:translation elongation factor activity; F:GTPase activity; F:GTP binding; C:ribosome; C:integral component of plasma membrane; P:regulation of translational elongation; F:transmembrane transporter activity; P:transmembrane transport	K03231	EEF1A; elongation factor 1-alpha	A 9120 Genetic Information Processing; B 09122 Translation; C 03013 Nucleocytoplasmic transport [PATH:ko03013]|A 9160 Human Diseases; B 09171 Infectious disease: bacterial; C 05134 Legionellosis [PATH:ko05134]|A 9160 Human Diseases; B 09174 Infectious disease: parasitic; C 05140 Leishmaniasis [PATH:ko05140]	217.308	8.90144	1.40236	6.34748	2.18867e-10	1.62518e-09	217.308	6.59121	1.29602	5.08574	3.662e-07	1.86372e-06	217.308	6.69263	1.29748	5.15818	2.49368e-07	1.82953e-06	35	139	1915	1	1	3.62	20.08	3.92	1.99	14.13	1.7	10.89
Am_HQ_52579	C:GO:0016021; F:GO:0016757	C:integral component of membrane; F:glycosyltransferase activity	.	.	.	150.51	6.78302	0.923286	7.34661	2.03302e-13	2.18086e-12	150.51	7.76316	0.985367	7.87844	3.31481e-15	5.52419e-14	150.51	6.6758	0.918056	7.27167	3.55078e-13	7.21851e-12	477.6	406.79	534.95	0	7.12	10.89	1.58	0	7.37	6.7	2	10.11
Am_HQ_12193	F:GO:0003677; C:GO:0005634; F:GO:0008270	F:DNA binding; C:nucleus; F:zinc ion binding	.	.	.	193.473	-0.509549	0.514405	-0.990559	0.321901	0.416429	193.473	-1.05956	0.513371	-2.06393	0.0390246	0.0679402	193.473	-0.460859	0.514484	-0.89577	0.370376	0.489478	28	112	189	163	199	253	220	322	356	183	218	192
Am_HQ_122	C:GO:0016020; F:GO:0016757	C:membrane; F:glycosyltransferase activity	K11000	CALS; callose synthase [EC:2.4.1.-]	None	2447.78	0.106103	0.355216	0.298701	0.765169	0.826064	2447.78	0.646888	0.355405	1.82014	0.0687371	0.111364	2447.78	-0.572959	0.355062	-1.61369	0.106595	0.178098	1478	3224	1340	2178	2466	2667	840	1996	2312	3456	4033	4300
Am_HQ_12930	F:GO:0004672; F:GO:0005524; C:GO:0005886; C:GO:0009506; C:GO:0016021; P:GO:0046777	F:protein kinase activity; F:ATP binding; C:plasma membrane; C:plasmodesma; C:integral component of membrane; P:protein autophosphorylation	.	.	.	254.297	-4.96665	4.00863	-1.23899	0.21535	0.298208	254.297	-12.1221	3.9974	-3.0325	0.0024254	0.00574389	254.297	0	4.16725	0	1	1	0	0	0	0	22	0	2191	425	360	0	0	0
Am_HQ_32364	P:GO:0005982; P:GO:0005985; F:GO:0042973; F:GO:0052861	P:starch metabolic process; P:sucrose metabolic process; F:glucan endo-1,3-beta-D-glucosidase activity; F:glucan endo-1,3-beta-glucanase activity, C-3 substituted reducing group	K01180	E3.2.1.6; endo-1,3(4)-beta-glucanase [EC:3.2.1.6]	None	147.044	6.48175	0.652536	9.93316	2.98628e-23	8.59255e-22	147.044	4.75133	0.595088	7.98426	1.41373e-15	2.44832e-14	147.044	6.65254	0.661638	10.0546	8.76343e-24	6.58688e-22	683	350	276	10	5	5	21	31	14	6	9	3
Am_HQ_22345	C:GO:0005874; F:GO:0008017; C:GO:0045298	C:microtubule; F:microtubule binding; C:tubulin complex	.	.	.	126.421	-8.08802	1.3568	-5.9611	2.50544e-09	1.62409e-08	126.421	-10.1594	1.35388	-7.50389	6.19526e-14	8.67023e-13	126.421	-9.67457	1.35422	-7.144	9.06555e-13	1.72848e-11	0	0	0	45.64	58.06	100.84	74.35	453.97	347.01	151.95	138.62	322.02
Am_HQ_12217	F:GO:0004674; F:GO:0005524; C:GO:0005886; P:GO:0009069; C:GO:0016021; P:GO:0046777	F:protein serine/threonine kinase activity; F:ATP binding; C:plasma membrane; P:serine family amino acid metabolic process; C:integral component of membrane; P:protein autophosphorylation	.	.	.	643.899	0.0319631	0.554564	0.0576364	0.954038	0.968793	643.899	0.346389	0.554779	0.624373	0.532382	0.625543	643.899	0.183711	0.554647	0.331221	0.740477	0.820752	632	342.61	708.88	891.27	366.82	1018.67	393.31	441.96	1014.83	1069.54	350.62	610.6
Am_HQ_36459	F:GO:0000287; F:GO:0004737; C:GO:0005829; P:GO:0006094; P:GO:0006096; F:GO:0030976	F:magnesium ion binding; F:pyruvate decarboxylase activity; C:cytosol; P:gluconeogenesis; P:glycolytic process; F:thiamine pyrophosphate binding	K01568	PDC, pdc; pyruvate decarboxylase [EC:4.1.1.1]	A 9100 Metabolism; B 09101 Carbohydrate metabolism; C 00010 Glycolysis / Gluconeogenesis [PATH:ko00010]	139.885	5.47563	1.26007	4.3455	1.38961e-05	5.1801e-05	139.885	5.27175	1.25743	4.19249	2.75912e-05	0.000100879	139.885	6.59771	1.28458	5.13608	2.80529e-07	2.03633e-06	772.87	274.31	176.6	17.95	3.76	17.39	0	10.57	37.4	8.97	0	9.48
Am_HQ_12224	C:GO:0016020	C:membrane	.	.	.	208.343	0.150298	0.401671	0.374181	0.708269	0.780304	208.343	0.199277	0.401831	0.495923	0.619949	0.70573	208.343	0.841066	0.403784	2.08296	0.0372547	0.0725716	309.96	127.18	150.5	213.79	226.31	299.25	177.4	252.04	283.86	164.16	128.95	164.87
Am_HQ_77966	F:GO:0004806; C:GO:0005576; C:GO:0016021; P:GO:0016042; P:GO:0046486	F:triglyceride lipase activity; C:extracellular region; C:integral component of membrane; P:lipid catabolic process; P:glycerolipid metabolic process	.	.	.	252.839	-6.93282	1.25824	-5.50994	3.5896e-08	1.98307e-07	252.839	-12.083	1.24926	-9.67208	3.96234e-22	1.47656e-20	252.839	-1.43163	1.61211	-0.888045	0.374517	0.49374	0	0	0	18	42	30	1104	1008	1030	2	0	0
Am_HQ_30363	C:GO:0000136; P:GO:0009294; P:GO:0009617; C:GO:0016021; F:GO:0047259; F:GO:0051753; P:GO:0097502	C:mannan polymerase complex; P:DNA-mediated transformation; P:response to bacterium; C:integral component of membrane; F:glucomannan 4-beta-mannosyltransferase activity; F:mannan synthase activity; P:mannosylation	K13680	CSLA; beta-mannan synthase [EC:2.4.1.32]	None	164.492	-7.05373	1.32785	-5.31216	1.08335e-07	5.55452e-07	164.492	-9.08571	1.32474	-6.8585	6.95897e-12	7.41821e-11	164.492	-9.66834	1.32439	-7.30025	2.87241e-13	6.01655e-12	1	0	0	17	97	79	282	218	265	542	321	308
Am_HQ_12230	P:GO:0009987	P:cellular process	K03164	TOP2; DNA topoisomerase II [EC:5.6.2.2]	A 9160 Human Diseases; B 09176 Drug resistance: antineoplastic; C 01524 Platinum drug resistance [PATH:ko01524]	384.132	0.708151	0.514858	1.37543	0.168999	0.242691	384.132	0.556414	0.51466	1.08113	0.279639	0.37005	384.132	-0.0167963	0.513979	-0.0326789	0.973931	0.988595	421.18	347.28	351.74	145.47	399.38	394.2	167.86	476.05	407.84	245.53	547.96	762.28
Am_HQ_12232	F:GO:0003746; F:GO:0003924; F:GO:0005525; C:GO:0005829; C:GO:0005840; P:GO:0006448; C:GO:1990904	F:translation elongation factor activity; F:GTPase activity; F:GTP binding; C:cytosol; C:ribosome; P:regulation of translational elongation; C:ribonucleoprotein complex	K06207	typA, bipA; GTP-binding protein	None	148.964	-2.72289	0.613921	-4.43525	9.19659e-06	3.52151e-05	148.964	-1.00043	0.617156	-1.62103	0.105011	0.160736	148.964	0.227321	0.623094	0.364826	0.715242	0.801166	40.79	26.26	70.08	654.5	244.05	302.1	106.22	65.59	201.87	64.43	29.79	66.46
Am_HQ_15174	.	.	.	.	.	53.8404	5.14086	1.13277	4.5383	5.67098e-06	2.25027e-05	53.8404	6.43024	1.20195	5.34986	8.80244e-08	4.9282e-07	53.8404	6.57997	1.21208	5.42864	5.6786e-08	4.83009e-07	176.38	144.21	174.49	11	0	8.11	0	5	2.63	5.3	0	2.49
Am_HQ_12238	F:GO:0004725; C:GO:0005737; P:GO:0006570; P:GO:0035335	F:protein tyrosine phosphatase activity; C:cytoplasm; P:tyrosine metabolic process; P:peptidyl-tyrosine dephosphorylation	K18045	SIW14, OCA3; tyrosine-protein phosphatase SIW14 [EC:3.1.3.48]	None	248.492	1.22369	1.19871	1.02084	0.307331	0.400744	248.492	0.24197	1.19794	0.201988	0.839926	0.883871	248.492	2.14564	1.20008	1.78791	0.0737911	0.130097	9.44	338.26	657.98	38.94	180.16	361.46	27.9	619.21	506.17	31.11	125.94	140.31
Am_HQ_89943	.	.	.	.	.	752.078	-0.117068	1.03549	-0.113055	0.909987	0.937598	752.078	-3.92015	1.03397	-3.79136	0.000149822	0.000468614	752.078	6.5653	1.18888	5.52226	3.34674e-08	2.9797e-07	15	91	328	433	24	144	3244	2638	2492	4	1	1
Am_HQ_32315	F:GO:0004674; F:GO:0004715; F:GO:0005524; P:GO:0009069; C:GO:0016021; P:GO:0018108	F:protein serine/threonine kinase activity; F:non-membrane spanning protein tyrosine kinase activity; F:ATP binding; P:serine family amino acid metabolic process; C:integral component of membrane; P:peptidyl-tyrosine phosphorylation	.	.	.	86.8318	-1.67326	1.16104	-1.44117	0.149536	0.219055	86.8318	-4.1386	1.15659	-3.57829	0.000345847	0.000998632	86.8318	6.56394	1.65014	3.97782	6.95496e-05	0.000289055	0	32.69	8.69	47.56	84.82	28.29	442.12	224.68	199.11	0	0	0
Am_HQ_83564	F:GO:0004601; C:GO:0005576; P:GO:0006804; P:GO:0006979; F:GO:0020037; P:GO:0042744; F:GO:0046872; P:GO:0098869	F:peroxidase activity; C:extracellular region; P:obsolete peroxidase reaction; P:response to oxidative stress; F:heme binding; P:hydrogen peroxide catabolic process; F:metal ion binding; P:cellular oxidant detoxification	K00430	E1.11.1.7; peroxidase [EC:1.11.1.7]	A 9100 Metabolism; B 09110 Biosynthesis of other secondary metabolites; C 00940 Phenylpropanoid biosynthesis [PATH:ko00940]	2008.48	6.31147	0.660789	9.55143	1.27922e-21	3.15143e-20	2008.48	5.57092	0.658803	8.45614	2.76383e-17	5.90777e-16	2008.48	6.52324	0.661521	9.86097	6.14532e-23	4.32482e-21	9917	5003	3157	28	111	188	222	113	175	136	59	78
Am_HQ_2262	.	.	.	.	.	151.772	9.92748	1.30063	7.63284	2.29638e-14	2.74448e-13	151.772	6.80135	0.875449	7.76898	7.91182e-15	1.2551e-13	151.772	6.5225	0.862154	7.56535	3.86817e-14	9.25095e-13	96	860	572	1	0	1	7	4	6	14	4	3
Am_HQ_55310	P:GO:0006979; C:GO:0009535; C:GO:0016021	P:response to oxidative stress; C:chloroplast thylakoid membrane; C:integral component of membrane	.	.	.	296.406	-11.7609	1.19741	-9.82196	9.0564e-23	2.45255e-21	296.406	-9.90507	1.19831	-8.26585	1.38702e-16	2.73909e-15	296.406	-9.64849	1.19853	-8.0503	8.259e-16	2.47972e-14	0	0	0	906	677	984	241	213	243	201	190	205
Am_HQ_41854	F:GO:0005524; C:GO:0016021; F:GO:0016887	F:ATP binding; C:integral component of membrane; F:ATP hydrolysis activity	.	.	.	238.737	-1.44184	1.60382	-0.899005	0.36865	0.465713	238.737	-12.0402	1.23918	-9.71633	2.56864e-22	9.8374e-21	238.737	0	1.70952	0	1	1	0	0	0	0	2	0	1003	957	1111	0	0	0
Am_HQ_12262	F:GO:0003723; C:GO:0005634; P:GO:0006397	F:RNA binding; C:nucleus; P:mRNA processing	K13091	RBM23_39; RNA-binding protein 23/39	None	224.518	0.933621	1.69046	0.552287	0.580752	0.67096	224.518	1.82416	1.69125	1.07859	0.280771	0.371103	224.518	1.24754	1.69067	0.7379	0.460575	0.578679	545.61	408.24	4.86	367.76	274	8.02	97.29	264.99	0	292.27	236.12	19.38
Am_HQ_79967	F:GO:0016853	F:isomerase activity	.	.	.	583.893	-12.8096	1.20626	-10.6193	2.42324e-26	8.90995e-25	583.893	-11.1845	1.2066	-9.26942	1.87164e-20	5.8583e-19	583.893	-9.64764	1.20754	-7.98948	1.35514e-15	3.98216e-14	0	0	0	2112	1341	1823	469	549	701	205	158	234
Am_HQ_12275	F:GO:0003723; F:GO:0046872	F:RNA binding; F:metal ion binding	.	.	.	396.209	0.33186	1.99451	0.166387	0.867852	0.905296	396.209	1.04838	1.99476	0.525569	0.599188	0.687158	396.209	0.409741	1.99452	0.205433	0.837234	0.892829	425.3	0	801.16	701.16	17.27	654.06	312.72	7.61	497.11	642.16	0	657.72
Am_HQ_60346	F:GO:0004497; F:GO:0005506; C:GO:0016021; F:GO:0016705; F:GO:0020037	F:monooxygenase activity; F:iron ion binding; C:integral component of membrane; F:oxidoreductase activity, acting on paired donors, with incorporation or reduction of molecular oxygen; F:heme binding	.	.	.	187.67	10.2012	1.62597	6.27393	3.52041e-10	2.54895e-09	187.67	8.1095	1.36603	5.93653	2.91121e-09	2.08127e-08	187.67	6.47779	1.30416	4.96704	6.79834e-07	4.54828e-06	866.69	907.1	15.7	0	2.06	0	6.14	2.16	0	11.66	8.6	6.34
Am_HQ_12279	F:GO:0003677; C:GO:0005634; F:GO:0046872	F:DNA binding; C:nucleus; F:metal ion binding	.	.	.	145.528	-0.285343	0.322271	-0.885413	0.375934	0.473274	145.528	-0.0339655	0.323634	-0.10495	0.916415	0.940636	145.528	-0.660251	0.320666	-2.059	0.0394943	0.0763489	93.5	124.55	77.08	142.48	185.93	147.74	74.09	155.84	179.8	224.66	212.26	187.36
Am_HQ_12288	.	.	.	.	.	113.695	-0.336127	3.73073	-0.0900969	0.92821	0.950526	113.695	-0.575523	3.73063	-0.154269	0.877397	0.911724	113.695	0.389593	3.73116	0.104416	0.916839	0.950341	0	238.25	32.27	0	386.32	10.38	10.15	489.87	0	0	248.39	0
Am_HQ_79360	F:GO:0004601; C:GO:0005576; P:GO:0006804; P:GO:0006979; C:GO:0009505; C:GO:0009506; F:GO:0020037; P:GO:0042744; F:GO:0046872; P:GO:0098869	F:peroxidase activity; C:extracellular region; P:obsolete peroxidase reaction; P:response to oxidative stress; C:plant-type cell wall; C:plasmodesma; F:heme binding; P:hydrogen peroxide catabolic process; F:metal ion binding; P:cellular oxidant detoxification	K00430	E1.11.1.7; peroxidase [EC:1.11.1.7]	A 9100 Metabolism; B 09110 Biosynthesis of other secondary metabolites; C 00940 Phenylpropanoid biosynthesis [PATH:ko00940]	97.5289	8.29687	1.53311	5.41179	6.2397e-08	3.32573e-07	97.5289	7.04465	1.43051	4.92457	8.45458e-07	4.05311e-06	97.5289	6.45369	1.40297	4.60002	4.22459e-06	2.3521e-05	81	269	600	2	0	2	5	1	3	14	0	0
Am_HQ_12293	F:GO:0005524; C:GO:0005634; C:GO:0005829	F:ATP binding; C:nucleus; C:cytosol	K09489	HSPA4; heat shock 70kDa protein 4	A 9140 Cellular Processes; B 09144 Cellular community - eukaryotes; C 04530 Tight junction [PATH:ko04530]|A 9150 Organismal Systems; B 09151 Immune system; C 04612 Antigen processing and presentation [PATH:ko04612]|A 9160 Human Diseases; B 09166 Cardiovascular disease; C 05417 Lipid and atherosclerosis [PATH:ko05417]	141.188	-0.747864	0.900162	-0.830811	0.406081	0.504558	141.188	-0.562779	0.900558	-0.624923	0.532022	0.625285	141.188	-1.55567	0.899001	-1.73044	0.0835518	0.144538	73.11	74.36	45.63	30.11	274.35	129.03	60.99	127.35	207.34	43.17	539.36	181.85
Am_HQ_71132	F:GO:0003676; C:GO:0005634; P:GO:0010468	F:nucleic acid binding; C:nucleus; P:regulation of gene expression	.	.	.	213.89	2.02246	0.584396	3.46077	0.000538634	0.00147402	213.89	6.01476	0.712136	8.44608	3.01247e-17	6.39477e-16	213.89	-1.24049	0.575857	-2.15416	0.0312275	0.0626022	173.37	119.77	275	55.21	30.24	110	3	1	8	642.69	375.95	819.24
Am_HQ_35729	C:GO:0005886; F:GO:0015333; C:GO:0016021; P:GO:0035672; F:GO:0035673; P:GO:1902600	C:plasma membrane; F:peptide:proton symporter activity; C:integral component of membrane; P:oligopeptide transmembrane transport; F:oligopeptide transmembrane transporter activity; P:proton transmembrane transport	.	.	.	107.901	1.38525	1.76067	0.786776	0.431413	0.530014	107.901	0.719709	1.75987	0.408957	0.682571	0.759031	107.901	6.44535	1.83001	3.52204	0.000428239	0.00146421	0	16.92	511.94	107.61	35.58	128.99	161.18	157.41	95.23	0	8.45	0
Am_HQ_55668	P:GO:0006094; F:GO:0008964; P:GO:0015977; P:GO:0019643	P:gluconeogenesis; F:phosphoenolpyruvate carboxylase activity; P:carbon fixation; P:reductive tricarboxylic acid cycle	K01595	ppc; phosphoenolpyruvate carboxylase [EC:4.1.1.31]	A 9100 Metabolism; B 09101 Carbohydrate metabolism; C 00620 Pyruvate metabolism [PATH:ko00620]|A 9100 Metabolism; B 09102 Energy metabolism; C 00710 Carbon fixation in photosynthetic organisms [PATH:ko00710]|A 9100 Metabolism; B 09102 Energy metabolism; C 00720 Carbon fixation pathways in prokaryotes [PATH:ko00720]|A 9100 Metabolism; B 09102 Energy metabolism; C 00680 Methane metabolism [PATH:ko0…	131.02	-10.1902	1.26994	-8.02421	1.0218e-15	1.42549e-14	131.02	-8.47412	1.27215	-6.66127	2.71468e-11	2.65086e-10	131.02	-9.62208	1.27038	-7.57416	3.61457e-14	8.68204e-13	0	0	0	350.84	232.2	271.84	118.84	59.43	74.1	248.64	132.39	204.06
Am_HQ_60028	.	.	.	.	.	235.475	-6.82967	1.86852	-3.65511	0.000257068	0.000753407	235.475	-11.9813	1.86204	-6.43454	1.2385e-10	1.08734e-09	235.475	0	2.20319	0	1	1	0	0	0	12	67	1	1139	1485	234	0	0	0
Am_HQ_12318	F:GO:0003876; P:GO:0006144; C:GO:0016021; P:GO:0032264; F:GO:0046872	F:AMP deaminase activity; P:purine nucleobase metabolic process; C:integral component of membrane; P:IMP salvage; F:metal ion binding	K01490	AMPD; AMP deaminase [EC:3.5.4.6]	A 9100 Metabolism; B 09104 Nucleotide metabolism; C 00230 Purine metabolism [PATH:ko00230]	309.684	0.0291965	1.52277	0.0191733	0.984703	0.99026	309.684	0.324773	1.52292	0.213257	0.831127	0.876587	309.684	0.285016	1.52289	0.187155	0.851539	0.903292	355.54	487	2.52	459.15	561.33	21.58	395.37	437.16	11.43	452.91	443.94	11.7
Am_HQ_25124	.	.	.	.	.	89.2079	-6.75882	1.68053	-4.02184	5.77457e-05	0.000192034	89.2079	-9.42375	1.67397	-5.62957	1.80658e-08	1.13997e-07	89.2079	-9.60673	1.6738	-5.73947	9.49748e-09	9.30299e-08	0	0	0	16.49	60.34	0	143.11	219.46	139.51	164.67	199.88	215.19
Am_HQ_12325	P:GO:0051603	P:proteolysis involved in cellular protein catabolic process	K10666	RNF5; E3 ubiquitin-protein ligase RNF5 [EC:2.3.2.27]	A 9120 Genetic Information Processing; B 09123 Folding, sorting and degradation; C 04141 Protein processing in endoplasmic reticulum [PATH:ko04141]	125.017	0.0824773	0.425927	0.193642	0.846456	0.889782	125.017	-0.103865	0.425176	-0.244286	0.807009	0.859187	125.017	-0.221318	0.424601	-0.521237	0.602202	0.707922	141.8	88.63	52.59	79.02	148.96	140.98	135.04	131.34	147.06	137.21	150.93	168.55
Am_HQ_87807	F:GO:0003700; C:GO:0005634; C:GO:0005667; P:GO:0006355; P:GO:0030154; F:GO:0043565	F:DNA-binding transcription factor activity; C:nucleus; C:transcription regulator complex; P:regulation of transcription, DNA-templated; P:cell differentiation; F:sequence-specific DNA binding	K09422	MYBP; transcription factor MYB, plant	None	1475.18	5.60648	0.664758	8.43386	3.34435e-17	5.35921e-16	1475.18	5.42086	0.664288	8.16041	3.33885e-16	6.27397e-15	1475.18	6.41608	0.667842	9.60718	7.45635e-22	4.60252e-20	8047	1594	3189	73	108	203	131	112	180	66	29	122
Am_HQ_1233	F:GO:0003723	F:RNA binding	K13210	FUBP; far upstream element-binding protein	None	262.651	-1.36071	0.49302	-2.75996	0.00578093	0.0126205	262.651	-0.473684	0.494389	-0.958121	0.338002	0.432348	262.651	-0.670197	0.493962	-1.35678	0.174851	0.26753	82.74	161.22	153.62	280.25	505.78	570.98	85.43	367.57	294.51	183.67	287.2	370.66
Am_HQ_12331	F:GO:0004842; P:GO:0016567; F:GO:0016746; F:GO:0016874	F:ubiquitin-protein transferase activity; P:protein ubiquitination; F:acyltransferase activity; F:ligase activity	.	.	.	583.874	-0.0165594	0.305064	-0.0542817	0.956711	0.970367	583.874	0.327799	0.3055	1.07299	0.283275	0.373787	583.874	0.606053	0.305871	1.9814	0.0475464	0.0893891	530	491	611	586	709	948	303	737	746	392	526	536
Am_HQ_12332	.	.	.	.	.	242.194	-0.511621	0.298188	-1.71576	0.0862053	0.137245	242.194	0.244672	0.300562	0.814049	0.415617	0.511631	242.194	-0.0908642	0.299283	-0.303606	0.761428	0.836409	162.22	216.3	170.3	301.85	368.58	365.54	117.67	281.82	221.69	271.89	304.19	201.08
Am_HQ_37199	.	.	.	.	.	298.921	-11.7354	1.20553	-9.73458	2.1471e-22	5.60173e-21	298.921	-10.0878	1.20628	-8.36277	6.12626e-17	1.25583e-15	298.921	-9.60648	1.20668	-7.96108	1.70542e-15	4.92111e-14	0	0	0	948.77	684.5	874.72	219.91	262.88	320.06	160.72	241.06	176.35
Am_HQ_12345	.	.	.	.	.	95.2937	0.124802	0.959842	0.130024	0.896548	0.92772	95.2937	1.50522	0.967135	1.55637	0.11962	0.179931	95.2937	-1.28017	0.957023	-1.33766	0.181008	0.275362	21.4	123.63	62.53	111.18	90.07	32.55	3.01	60.56	33.2	310.83	267.34	59.4
Am_HQ_48857	F:GO:0004683; F:GO:0005509; F:GO:0005516; F:GO:0005524; C:GO:0005634; C:GO:0005737; C:GO:0005886; P:GO:0009069; F:GO:0009931; P:GO:0018105; P:GO:0035556; P:GO:0046777; P:GO:0080092; P:GO:1901979	F:calmodulin-dependent protein kinase activity; F:calcium ion binding; F:calmodulin binding; F:ATP binding; C:nucleus; C:cytoplasm; C:plasma membrane; P:serine family amino acid metabolic process; F:calcium-dependent protein serine/threonine kinase activity; P:peptidyl-serine phosphorylation; P:intracellular signal transduction; P:protein autophosphorylation; P:regulation of pollen tube growth; P…	K13412	CPK; calcium-dependent protein kinase [EC:2.7.11.1]	A 9150 Organismal Systems; B 09159 Environmental adaptation; C 04626 Plant-pathogen interaction [PATH:ko04626]|A 9160 Human Diseases; B 09174 Infectious disease: parasitic; C 05145 Toxoplasmosis [PATH:ko05145]	160.101	1.89898	1.59146	1.19323	0.232778	0.318274	160.101	-5.43551	1.53861	-3.53274	0.000411274	0.00116562	160.101	6.41561	1.93748	3.31131	0.000928594	0.00290982	2	1	32	2	10	0	1325	288	225	0	0	0
Am_HQ_63044	F:GO:0004364; C:GO:0005737; P:GO:0006749; P:GO:0006803	F:glutathione transferase activity; C:cytoplasm; P:glutathione metabolic process; P:obsolete glutathione conjugation reaction	K00799	GST, gst; glutathione S-transferase [EC:2.5.1.18]	A 9100 Metabolism; B 09106 Metabolism of other amino acids; C 00480 Glutathione metabolism [PATH:ko00480]|A 9100 Metabolism; B 09111 Xenobiotics biodegradation and metabolism; C 00980 Metabolism of xenobiotics by cytochrome P450 [PATH:ko00980]|A 9100 Metabolism; B 09111 Xenobiotics biodegradation and metabolism; C 00982 Drug metabolism - cytochrome P450 [PATH:ko00982]|A 9100 Metabolism; B 09111 X…	175.431	4.8993	0.615109	7.96492	1.65326e-15	2.25516e-14	175.431	0.625576	0.578456	1.08146	0.279494	0.369938	175.431	6.41486	0.680377	9.42839	4.16423e-21	2.37781e-19	185.27	677.54	194.97	16.02	7.01	23.06	222.11	249.32	411.59	6.01	2	8.19
Am_HQ_89155	F:GO:0005344; C:GO:0005737; P:GO:0015671; C:GO:0016363; F:GO:0019825; F:GO:0020037; F:GO:0046872	F:oxygen carrier activity; C:cytoplasm; P:oxygen transport; C:nuclear matrix; F:oxygen binding; F:heme binding; F:metal ion binding	.	.	.	2561.78	6.04067	0.3967	15.2273	2.33019e-52	3.81426e-50	2561.78	2.96939	0.391384	7.58688	3.27706e-14	4.75798e-13	2561.78	6.40003	0.398315	16.0677	4.29469e-58	3.51496e-55	7279.01	7389.4	6867.38	61.25	128.35	266.09	1040.72	1224.4	1417.26	133.73	118.49	91.13
Am_HQ_89561	.	.	.	.	.	232.074	4.28705	0.669659	6.40185	1.53507e-10	1.16171e-09	232.074	5.9299	0.717668	8.26274	1.42367e-16	2.80645e-15	232.074	-0.300385	0.647061	-0.464229	0.642484	0.74309	301	232	440	17	22	29	16	1	3	358	721	551
Am_HQ_12362	.	.	.	.	.	138.228	0.334109	0.410619	0.813673	0.415832	0.514131	138.228	0.779433	0.412681	1.88871	0.0589309	0.0974337	138.228	0.476295	0.411127	1.15851	0.246655	0.354741	103	127	207	149	138	176	46	145	158	132	149	140
Am_HQ_54066	F:GO:0004190; P:GO:0006508	F:aspartic-type endopeptidase activity; P:proteolysis	.	.	.	12531.5	7.57199	0.600223	12.6153	1.7388e-36	1.21981e-34	12531.5	3.4289	0.598094	5.73305	9.86403e-09	6.52035e-08	12531.5	6.38965	0.59895	10.6681	1.43559e-26	1.38961e-24	21819	19227	68591	113	233	454	2965	3611	7364	398	496	887
Am_HQ_90264	.	.	.	.	.	1131.61	2.26032	0.54204	4.17002	3.04576e-05	0.000106546	1131.61	5.89984	0.558156	10.5702	4.0949e-26	2.26223e-24	1131.61	-0.0403009	0.54091	-0.0745057	0.940608	0.965916	1167	2967	928	282	542	552	53	19	33	3365	1623	1744
Am_HQ_12372	F:GO:0004672; F:GO:0005524; P:GO:0006468	F:protein kinase activity; F:ATP binding; P:protein phosphorylation	K08818	CDC2L; cell division cycle 2-like [EC:2.7.11.22]	None	327.95	-0.0766664	0.701123	-0.109348	0.912926	0.939542	327.95	1.00363	0.702383	1.42889	0.153035	0.222032	327.95	0.32038	0.701459	0.456734	0.647862	0.747301	197.08	108.73	636.69	406.09	259.31	710.84	99.41	126.51	435.99	310.62	269.9	451.1
Am_HQ_88623	C:GO:0016021	C:integral component of membrane	.	.	.	227.706	0	3.11925	0	1	1	227.706	-11.971	2.88841	-4.1445	3.40552e-05	0.000122128	227.706	-2.45729	2.97535	-0.825883	0.408871	0.52819	0	0	0	0	0	0	769	989	1216	4	0	0
Am_HQ_42733	C:GO:0005737; F:GO:0016881	C:cytoplasm; F:acid-amino acid ligase activity	K14487	GH3; auxin responsive GH3 gene family	A 9130 Environmental Information Processing; B 09132 Signal transduction; C 04075 Plant hormone signal transduction [PATH:ko04075]	459.778	-11.1061	1.37154	-8.09753	5.60884e-16	8.00156e-15	459.778	-10.2107	1.37176	-7.44351	9.80438e-14	1.33656e-12	459.778	-9.6023	1.37198	-6.99887	2.58041e-12	4.60969e-11	1	0	0	1438	683	1021	339	603	794	264	749	97
Am_HQ_75490	.	.	.	.	.	125.341	6.55959	1.14422	5.73282	9.87769e-09	5.90257e-08	125.341	7.10278	1.16946	6.07354	1.25122e-09	9.50807e-09	125.341	6.38763	1.13763	5.61485	1.96727e-08	1.81819e-07	580.46	74.82	471.43	9.67	5.62	0	0	7.38	4.82	4.22	9.82	4.6
Am_HQ_69425	P:GO:0009813; F:GO:0045486; F:GO:0046872	P:flavonoid biosynthetic process; F:naringenin 3-dioxygenase activity; F:metal ion binding	.	.	.	824.623	5.51382	0.426824	12.9183	3.55122e-38	2.81272e-36	824.623	6.17527	0.433282	14.2523	4.33796e-46	1.15494e-43	824.623	6.38049	0.43552	14.6503	1.34177e-48	6.17719e-46	2950	2536	2099	76	56	94	60	28	50	64	33	26
Am_HQ_12398	P:GO:0006904	P:vesicle docking involved in exocytosis	.	.	.	176.506	-0.147991	0.337373	-0.438657	0.66091	0.740495	176.506	-0.0150516	0.337919	-0.0445421	0.964472	0.975732	176.506	-0.0916043	0.337521	-0.271403	0.786081	0.855181	131.56	165.83	115.31	183.06	125.66	313.23	143.63	236.92	172.78	164.73	179.23	247.71
Am_HQ_12399	F:GO:0003677; F:GO:0008168; P:GO:0032259; F:GO:0052894; F:GO:0052895; F:GO:0052901	F:DNA binding; F:methyltransferase activity; P:methylation; F:norspermine:oxygen oxidoreductase activity; F:N1-acetylspermine:oxygen oxidoreductase (N1-acetylspermidine-forming) activity; F:spermine:oxygen oxidoreductase (spermidine-forming) activity	.	.	.	201	0.497563	1.1893	0.418368	0.675678	0.753641	201	1.00167	1.18987	0.841834	0.399881	0.495545	201	0.77791	1.18956	0.653946	0.513146	0.628402	294.59	362.9	45.99	186.61	408.11	40.76	144.18	298.13	12.4	170.05	351.24	21.43
Am_HQ_79190	C:GO:0016021	C:integral component of membrane	.	.	.	268.48	6.10338	0.877942	6.95191	3.60377e-12	3.32788e-11	268.48	4.45904	0.8608	5.1801	2.21762e-07	1.16346e-06	268.48	6.37484	0.882819	7.22101	5.1603e-13	1.02732e-11	1116	307	919	1	14	35	33	69	47	4	14	22
Am_HQ_12402	P:GO:0006355; C:GO:0016592	P:regulation of transcription, DNA-templated; C:mediator complex	.	.	.	464.361	0.570633	1.00882	0.565643	0.571636	0.662681	464.361	0.988394	1.0091	0.979477	0.327344	0.420977	464.361	0.0125655	1.00856	0.0124589	0.990059	0.999513	178.85	1212.14	140.93	205.18	818.92	231.01	87.21	733.95	160.63	341.2	1306.26	237.96
Am_HQ_46544	F:GO:0003677	F:DNA binding	.	.	.	1249.31	6.6647	0.309289	21.5484	5.47527e-103	8.06617e-100	1249.31	5.9766	0.301029	19.8539	1.01901e-87	2.0471e-84	1249.31	6.37468	0.305119	20.8925	6.27014e-97	3.46394e-93	3703	5292	2849	54	49	51	54	101	96	62	45	84
Am_HQ_43043	P:GO:0006633; C:GO:0016021; F:GO:0016747	P:fatty acid biosynthetic process; C:integral component of membrane; F:acyltransferase activity, transferring groups other than amino-acyl groups	K15397	KCS; 3-ketoacyl-CoA synthase [EC:2.3.1.199]	A 9100 Metabolism; B 09103 Lipid metabolism; C 00062 Fatty acid elongation [PATH:ko00062]|A 9150 Organismal Systems; B 09159 Environmental adaptation; C 04626 Plant-pathogen interaction [PATH:ko04626]	1484.9	-12.8382	1.28325	-10.0045	1.45688e-23	4.33299e-22	1484.9	-12.3894	1.28328	-9.65451	4.70398e-22	1.72959e-20	1484.9	-9.59075	1.2839	-7.47003	8.01744e-14	1.84168e-12	1	0	0	3889	2830	3792	1240	3035	3646	571	364	168
Am_HQ_82763	F:GO:0005506; C:GO:0005737; P:GO:0019310; F:GO:0050113	F:iron ion binding; C:cytoplasm; P:inositol catabolic process; F:inositol oxygenase activity	K00469	MIOX; inositol oxygenase [EC:1.13.99.1]	A 9100 Metabolism; B 09101 Carbohydrate metabolism; C 00053 Ascorbate and aldarate metabolism [PATH:ko00053]|A 9100 Metabolism; B 09101 Carbohydrate metabolism; C 00562 Inositol phosphate metabolism [PATH:ko00562]	124.372	10.4865	1.60429	6.53658	6.29426e-11	4.97819e-10	124.372	4.81027	1.10658	4.34697	1.38034e-05	5.34198e-05	124.372	6.31308	1.13695	5.55263	2.81408e-08	2.54442e-07	341.75	114.77	672.08	1	0	0	10.41	9.19	38.02	0	3.91	16.05
Am_HQ_12415	F:GO:0003723; C:GO:0005634; P:GO:0006397	F:RNA binding; C:nucleus; P:mRNA processing	K13091	RBM23_39; RNA-binding protein 23/39	None	332.57	-0.157626	0.500274	-0.31508	0.752701	0.816112	332.57	0.506472	0.501334	1.01025	0.312376	0.404969	332.57	-0.33897	0.500049	-0.677872	0.497853	0.614268	251.18	244.43	295.15	315.77	256.76	642.45	133.65	179.29	457.78	326.42	311.1	727.77
Am_HQ_80663	F:GO:0004365; P:GO:0006094; P:GO:0006096; F:GO:0050661; F:GO:0051287	F:glyceraldehyde-3-phosphate dehydrogenase (NAD+) (phosphorylating) activity; P:gluconeogenesis; P:glycolytic process; F:NADP binding; F:NAD binding	K00134	GAPDH, gapA; glyceraldehyde 3-phosphate dehydrogenase (phosphorylating) [EC:1.2.1.12]	A 9100 Metabolism; B 09101 Carbohydrate metabolism; C 00010 Glycolysis / Gluconeogenesis [PATH:ko00010]|A 9100 Metabolism; B 09102 Energy metabolism; C 00710 Carbon fixation in photosynthetic organisms [PATH:ko00710]|A 9130 Environmental Information Processing; B 09132 Signal transduction; C 04066 HIF-1 signaling pathway [PATH:ko04066]|A 9160 Human Diseases; B 09171 Infectious disease: bacterial;…	28.0402	9.11998	2.04218	4.4658	7.97699e-06	3.08822e-05	28.0402	2.51692	1.67996	1.4982	0.134081	0.198534	28.0402	6.29741	1.81988	3.46034	0.000539498	0.00180142	1	22	210	0	0	0	31	8	11	1	0	3
Am_HQ_62634	F:GO:0016758	F:hexosyltransferase activity	.	.	.	637.944	4.00624	0.783668	5.11217	3.18481e-07	1.53062e-06	637.944	3.00427	0.782134	3.84112	0.000122476	0.000390321	637.944	6.29714	0.795469	7.91626	2.44762e-15	6.89014e-14	852	1108	3247	26	155	268	133	444.91	303	11	43	35
Am_HQ_7196	.	.	.	.	.	430.185	-0.371044	1.57201	-0.236031	0.813409	0.86446	430.185	5.79314	1.59309	3.63642	0.00027645	0.000816275	430.185	0.111905	1.57213	0.0711804	0.943254	0.968004	209.57	371.21	730.41	1853.42	41.12	242.79	0	32.37	0	1263.87	133.66	190.95
Am_HQ_12440	F:GO:0016301; P:GO:0016310	F:kinase activity; P:phosphorylation	.	.	.	354.583	0.123382	0.235305	0.52435	0.600035	0.68813	354.583	0.429988	0.236187	1.82054	0.0686764	0.111296	354.583	0.461656	0.236195	1.95455	0.0506357	0.0943546	404	280	319	407	418	422	312	315	377	298	345	354
Am_HQ_12443	C:GO:0000139; F:GO:0004672; F:GO:0005198; F:GO:0005524; C:GO:0005783; C:GO:0005793; P:GO:0006468; P:GO:0006886; P:GO:0006888; P:GO:0006891; P:GO:0009306; C:GO:0016021; C:GO:0030126	C:Golgi membrane; F:protein kinase activity; F:structural molecule activity; F:ATP binding; C:endoplasmic reticulum; C:endoplasmic reticulum-Golgi intermediate compartment; P:protein phosphorylation; P:intracellular protein transport; P:endoplasmic reticulum to Golgi vesicle-mediated transport; P:intra-Golgi vesicle-mediated transport; P:protein secretion; C:integral component of membrane; C:COPI…	K17267	COPG; coatomer subunit gamma	None	675.238	1.16466	0.471282	2.47127	0.0134635	0.0268081	675.238	0.786854	0.470957	1.67076	0.09477	0.147036	675.238	0.846889	0.470981	1.79814	0.0721552	0.127661	443.89	709.39	1421.49	611.31	408.07	490.07	363.39	816.5	834.02	446.83	912.96	541.54
Am_HQ_12445	C:GO:0000139; F:GO:0004672; F:GO:0005198; F:GO:0005524; C:GO:0005783; C:GO:0005793; P:GO:0006468; P:GO:0006886; P:GO:0006888; P:GO:0006891; P:GO:0009306; C:GO:0016021; C:GO:0030126	C:Golgi membrane; F:protein kinase activity; F:structural molecule activity; F:ATP binding; C:endoplasmic reticulum; C:endoplasmic reticulum-Golgi intermediate compartment; P:protein phosphorylation; P:intracellular protein transport; P:endoplasmic reticulum to Golgi vesicle-mediated transport; P:intra-Golgi vesicle-mediated transport; P:protein secretion; C:integral component of membrane; C:COPI…	K17267	COPG; coatomer subunit gamma	None	528.023	0.562824	0.370689	1.51832	0.128934	0.19327	528.023	0.666864	0.370852	1.7982	0.072146	0.116091	528.023	0.267177	0.37032	0.721474	0.470618	0.588119	385	639.22	638.21	346.67	598.29	542.04	240.31	641.26	524.61	410.78	661.82	768.79
Am_HQ_12454	C:GO:0000139; F:GO:0004672; F:GO:0005198; F:GO:0005524; C:GO:0005783; C:GO:0005793; P:GO:0006468; P:GO:0006886; P:GO:0006888; P:GO:0006891; P:GO:0009306; C:GO:0016021; C:GO:0030126	C:Golgi membrane; F:protein kinase activity; F:structural molecule activity; F:ATP binding; C:endoplasmic reticulum; C:endoplasmic reticulum-Golgi intermediate compartment; P:protein phosphorylation; P:intracellular protein transport; P:endoplasmic reticulum to Golgi vesicle-mediated transport; P:intra-Golgi vesicle-mediated transport; P:protein secretion; C:integral component of membrane; C:COPI…	K17267	COPG; coatomer subunit gamma	None	1100.93	-0.0277137	0.307756	-0.0900509	0.928247	0.950526	1100.93	0.00780303	0.307791	0.0253518	0.979774	0.986541	1100.93	-0.279816	0.307589	-0.909705	0.362978	0.481863	954.25	821.24	736	780.28	1197.01	1524.66	1166.02	934.32	1220.23	1303.72	1008.8	1854.35
Am_HQ_76807	C:GO:0005886; C:GO:0016021; F:GO:0022857; P:GO:0055085	C:plasma membrane; C:integral component of membrane; F:transmembrane transporter activity; P:transmembrane transport	.	.	.	59.3055	8.82689	1.63176	5.40943	6.32258e-08	3.36747e-07	59.3055	5.78701	1.23002	4.70479	2.54123e-06	1.1182e-05	59.3055	0.835117	1.13253	0.737391	0.460884	0.578902	117.08	215.42	41.7	0	0	1	0	8.65	0	54.09	110.49	113.03
Am_HQ_12462	C:GO:0016020	C:membrane	.	.	.	236.662	1.52125	0.624818	2.43471	0.0149038	0.0293272	236.662	0.476496	0.622868	0.765003	0.44427	0.540023	236.662	1.38735	0.624443	2.22174	0.0263009	0.0539745	180	294	478	100	151	193	304	302	283	326	51	103
Am_HQ_83870	F:GO:0000977; F:GO:0003700; C:GO:0005634; C:GO:0005667; P:GO:0006355; P:GO:0007275; F:GO:0008134; C:GO:0016020; P:GO:0045944; F:GO:0046983	F:RNA polymerase II transcription regulatory region sequence-specific DNA binding; F:DNA-binding transcription factor activity; C:nucleus; C:transcription regulator complex; P:regulation of transcription, DNA-templated; P:multicellular organism development; F:transcription factor binding; C:membrane; P:positive regulation of transcription by RNA polymerase II; F:protein dimerization activity	.	.	.	218.958	0.720439	0.533486	1.35044	0.176876	0.252265	218.958	5.77923	0.627144	9.21515	3.10842e-20	9.48755e-19	218.958	-0.192881	0.531997	-0.362561	0.716933	0.802573	179.01	214.58	379.46	174.16	193.73	262.63	5.27	0	14	444.07	447.93	286.73
Am_HQ_13531	P:GO:0006809; C:GO:0009325; F:GO:0009703; F:GO:0020037; F:GO:0030151; P:GO:0042128; F:GO:0043546; F:GO:0050464	P:nitric oxide biosynthetic process; C:nitrate reductase complex; F:nitrate reductase (NADH) activity; F:heme binding; F:molybdenum ion binding; P:nitrate assimilation; F:molybdopterin cofactor binding; F:nitrate reductase (NADPH) activity	K10534	NR; nitrate reductase (NAD(P)H) [EC:1.7.1.1 1.7.1.2 1.7.1.3]	A 9100 Metabolism; B 09102 Energy metabolism; C 00910 Nitrogen metabolism [PATH:ko00910]	5602.06	4.10116	0.546529	7.50402	6.18894e-14	7.02792e-13	5602.06	7.67543	0.551843	13.9087	5.60708e-44	1.3468e-41	5602.06	6.27896	0.54821	11.4536	2.25626e-30	3.28018e-28	19188.1	18287.3	12892.1	2114.37	637.74	1143.44	101.86	62.94	167	448.79	146.22	281.86
Am_HQ_52957	F:GO:0004372; C:GO:0005739; P:GO:0006565; F:GO:0008168; F:GO:0008270; P:GO:0019264; F:GO:0030170; P:GO:0032259; P:GO:0035999; P:GO:0046655; F:GO:0050897; F:GO:0070905; P:GO:1904482	F:glycine hydroxymethyltransferase activity; C:mitochondrion; P:L-serine catabolic process; F:methyltransferase activity; F:zinc ion binding; P:glycine biosynthetic process from serine; F:pyridoxal phosphate binding; P:methylation; P:tetrahydrofolate interconversion; P:folic acid metabolic process; F:cobalt ion binding; F:serine binding; P:cellular response to tetrahydrofolate	K00600	glyA, SHMT; glycine hydroxymethyltransferase [EC:2.1.2.1]	A 9100 Metabolism; B 09101 Carbohydrate metabolism; C 00630 Glyoxylate and dicarboxylate metabolism [PATH:ko00630]|A 9100 Metabolism; B 09102 Energy metabolism; C 00680 Methane metabolism [PATH:ko00680]|A 9100 Metabolism; B 09105 Amino acid metabolism; C 00260 Glycine, serine and threonine metabolism [PATH:ko00260]|A 9100 Metabolism; B 09106 Metabolism of other amino acids; C 00460 Cyanoamino aci…	1412.3	-13.3547	1.23407	-10.8216	2.71921e-27	1.0788e-25	1412.3	-10.6085	1.2344	-8.59406	8.3947e-18	1.9085e-16	1412.3	-9.57922	1.23478	-7.75784	8.63906e-15	2.2754e-13	0	1	0	5729.33	3553.55	5805.34	506.81	724.36	1043.87	464.58	219.57	423.47
Am_HQ_89009	C:GO:0016021; F:GO:0016491	C:integral component of membrane; F:oxidoreductase activity	K14332	psaO; photosystem I subunit PsaO	A 9100 Metabolism; B 09102 Energy metabolism; C 00195 Photosynthesis [PATH:ko00195]	570.012	-10.1855	1.0449	-9.74781	1.88483e-22	4.93495e-21	570.012	-9.76085	1.04501	-9.3404	9.59741e-21	3.10973e-19	570.012	-9.57261	1.04507	-9.15982	5.19862e-20	2.59321e-18	0	2	0	734	1112	1274	740	764	772	684	696	654
Am_HQ_12491	C:GO:0005886	C:plasma membrane	.	.	.	435.396	-0.130159	0.240298	-0.541655	0.588056	0.677699	435.396	0.191572	0.241017	0.794848	0.426702	0.52286	435.396	0.0812387	0.240698	0.337513	0.73573	0.816911	308.62	418.65	362.65	632.99	440.09	500.11	306.62	463.66	505.04	485.82	514.57	372.33
Am_HQ_55988	F:GO:0000030; C:GO:0000136; F:GO:0004497; F:GO:0005506; C:GO:0005789; F:GO:0016705; F:GO:0020037; P:GO:0097502	F:mannosyltransferase activity; C:mannan polymerase complex; F:monooxygenase activity; F:iron ion binding; C:endoplasmic reticulum membrane; F:oxidoreductase activity, acting on paired donors, with incorporation or reduction of molecular oxygen; F:heme binding; P:mannosylation	.	.	.	806.85	-13.237	1.27193	-10.407	2.30268e-25	7.78053e-24	806.85	-11.9044	1.27211	-9.35797	8.12836e-21	2.65318e-19	806.85	-9.56599	1.27327	-7.51294	5.78161e-14	1.35198e-12	0	0	0	1239	3299	2607	404	1146	1367	173	177	214
Am_HQ_125	C:GO:0016021	C:integral component of membrane	K19525	VPS13A_C; vacuolar protein sorting-associated protein 13A/C	None	1821.48	0.492887	0.3614	1.36383	0.172622	0.247076	1821.48	0.772595	0.361523	2.13706	0.0325932	0.0580703	1821.48	0.205374	0.361297	0.568436	0.569739	0.679261	1742	2756	1193	1618	2106	1553	902	1961	1576	1969	2810	1744
Am_HQ_1250	P:GO:0006396	P:RNA processing	.	.	.	228.787	0.47838	0.30287	1.57949	0.114223	0.174389	228.787	0.645667	0.303545	2.12709	0.0334129	0.0593249	228.787	0.377355	0.302481	1.24753	0.212202	0.313368	256.43	266.27	188.89	238.78	159.49	291.94	137.05	246.42	230.56	224.94	197.64	318.55
Am_HQ_34625	P:GO:0000742; F:GO:0005524; P:GO:0006616; P:GO:0006986; C:GO:0016021; F:GO:0016887; P:GO:0030433; P:GO:0031204; C:GO:0034099; F:GO:0051082; P:GO:0070880	P:karyogamy involved in conjugation with cellular fusion; F:ATP binding; P:SRP-dependent cotranslational protein targeting to membrane, translocation; P:response to unfolded protein; C:integral component of membrane; F:ATP hydrolysis activity; P:ubiquitin-dependent ERAD pathway; P:post-translational protein targeting to membrane, translocation; C:luminal surveillance complex; F:unfolded protein b…	K09490	HSPA5, BIP; endoplasmic reticulum chaperone BiP [EC:3.6.4.10]	A 9120 Genetic Information Processing; B 09123 Folding, sorting and degradation; C 03060 Protein export [PATH:ko03060]|A 9120 Genetic Information Processing; B 09123 Folding, sorting and degradation; C 04141 Protein processing in endoplasmic reticulum [PATH:ko04141]|A 9150 Organismal Systems; B 09151 Immune system; C 04612 Antigen processing and presentation [PATH:ko04612]|A 9150 Organismal Syste…	30.4218	6.24464	1.82667	3.41859	0.00062946	0.00169818	30.4218	-3.07955	1.39826	-2.20242	0.0276355	0.0502417	30.4218	6.25612	1.82667	3.42488	0.000615077	0.00202744	1	7	24	0	0	0	178	59	99	0	0	0
Am_HQ_12504	P:GO:0006355; F:GO:0008270	P:regulation of transcription, DNA-templated; F:zinc ion binding	K17604	ZSWIM3; zinc finger SWIM domain-containing protein 3	None	131.972	0.0469675	0.477412	0.0983794	0.921631	0.945857	131.972	0.631449	0.479636	1.31652	0.188001	0.264564	131.972	0.560833	0.479199	1.17035	0.241858	0.348977	175.59	94.14	109.96	195.57	123.08	185.51	140.91	67.53	118.37	163.05	86.5	106.42
Am_HQ_14068	F:GO:0004553; P:GO:0005975; C:GO:0016021; F:GO:0030246	F:hydrolase activity, hydrolyzing O-glycosyl compounds; P:carbohydrate metabolic process; C:integral component of membrane; F:carbohydrate binding	K01187	malZ; alpha-glucosidase [EC:3.2.1.20]	A 9100 Metabolism; B 09101 Carbohydrate metabolism; C 00052 Galactose metabolism [PATH:ko00052]|A 9100 Metabolism; B 09101 Carbohydrate metabolism; C 00500 Starch and sucrose metabolism [PATH:ko00500]	530.645	9.12693	1.6188	5.63809	1.71944e-08	9.95968e-08	530.645	1.09183	1.53969	0.709124	0.478248	0.573212	530.645	6.20874	1.55002	4.0056	6.18607e-05	0.000260579	40	224	3250	0	8	0	78	1126	1098	2	30	32
Am_HQ_53533	P:GO:0006520; F:GO:0016847; F:GO:0030170; P:GO:0042218	P:cellular amino acid metabolic process; F:1-aminocyclopropane-1-carboxylate synthase activity; F:pyridoxal phosphate binding; P:1-aminocyclopropane-1-carboxylate biosynthetic process	K20772	ACS1_2_6; 1-aminocyclopropane-1-carboxylate synthase 1/2/6 [EC:4.4.1.14]	A 9100 Metabolism; B 09105 Amino acid metabolism; C 00270 Cysteine and methionine metabolism [PATH:ko00270]|A 9130 Environmental Information Processing; B 09132 Signal transduction; C 04016 MAPK signaling pathway - plant [PATH:ko04016]	542.035	7.42213	0.695013	10.6791	1.27472e-26	4.79877e-25	542.035	2.80907	0.653091	4.30118	1.69888e-05	6.46161e-05	542.035	6.19558	0.67011	9.24561	2.339e-20	1.22482e-18	854	977	2723	14	4	18	89	304	514	34	29	20
Am_HQ_12517	F:GO:0005524; F:GO:0016887	F:ATP binding; F:ATP hydrolysis activity	K06184	ABCF1; ATP-binding cassette, subfamily F, member 1	None	215.297	1.14234	0.644215	1.77323	0.0761903	0.123507	215.297	1.30256	0.644655	2.02055	0.0433267	0.0745142	215.297	0.291331	0.64267	0.453313	0.650323	0.749418	409.86	257.57	94.11	140.9	155.46	180.28	213.75	129.19	55.88	188.78	329.43	347.11
Am_HQ_12518	F:GO:0008233	F:peptidase activity	K08596	SENP7; sentrin-specific protease 7 [EC:3.4.22.68]	None	248.586	-0.181629	0.761419	-0.23854	0.811462	0.863138	248.586	0.354344	0.762124	0.464942	0.641973	0.724832	248.586	-0.192775	0.761392	-0.253188	0.800123	0.865291	16.63	446.26	177.56	238.36	380.11	280.85	168.33	262.94	189.56	357.11	346.4	209.3
Am_HQ_12521	F:GO:0016853	F:isomerase activity	K09566	PPIG; peptidyl-prolyl isomerase G (cyclophilin G) [EC:5.2.1.8]	None	105.955	0.235647	1.60027	0.147255	NA	NA	105.955	0.464953	1.60065	0.290478	NA	NA	105.955	-0.154061	1.59977	-0.0963025	NA	NA	7.63	7.67	264.65	27.3	12.86	306.73	24.43	10.75	256.19	12.07	30.2	390.53
Am_HQ_85352	C:GO:0046658	C:anchored component of plasma membrane	.	.	.	818.724	-4.89085	2.85155	-1.71515	0.0863169	0.137383	818.724	-11.8869	2.84716	-4.17502	2.9796e-05	0.00010817	818.724	2.34872	3.08118	0.762281	0.445892	0.564563	1	0	1	0	79	0	7014	1495	1062	0	0	0
Am_HQ_20022	.	.	K00134	GAPDH, gapA; glyceraldehyde 3-phosphate dehydrogenase (phosphorylating) [EC:1.2.1.12]	A 9100 Metabolism; B 09101 Carbohydrate metabolism; C 00010 Glycolysis / Gluconeogenesis [PATH:ko00010]|A 9100 Metabolism; B 09102 Energy metabolism; C 00710 Carbon fixation in photosynthetic organisms [PATH:ko00710]|A 9130 Environmental Information Processing; B 09132 Signal transduction; C 04066 HIF-1 signaling pathway [PATH:ko04066]|A 9160 Human Diseases; B 09171 Infectious disease: bacterial;…	135.86	5.18268	0.619115	8.37111	5.70757e-17	8.95144e-16	135.86	3.8786	0.596001	6.50771	7.63075e-11	6.96507e-10	135.86	6.18637	0.655882	9.43215	4.01773e-21	2.30607e-19	553.83	334.04	275.43	18.75	8.2	17.06	11.26	37.26	64.58	7.29	8.85	6.19
Am_HQ_12528	F:GO:0004754; P:GO:0006554; P:GO:0009085; C:GO:0016021; F:GO:0047130; F:GO:0047131	F:saccharopine dehydrogenase (NAD+, L-lysine-forming) activity; P:lysine catabolic process; P:lysine biosynthetic process; C:integral component of membrane; F:saccharopine dehydrogenase (NADP+, L-lysine-forming) activity; F:saccharopine dehydrogenase (NAD+, L-glutamate-forming) activity	K14157	AASS; alpha-aminoadipic semialdehyde synthase [EC:1.5.1.8 1.5.1.9]	A 9100 Metabolism; B 09105 Amino acid metabolism; C 00310 Lysine degradation [PATH:ko00310]	431.547	-0.35607	1.583	-0.224934	0.822031	0.871318	431.547	-0.224175	1.58304	-0.14161	0.887388	0.919166	431.547	0.301202	1.58322	0.190247	0.849116	0.901714	197.48	3.94	766.38	441.6	16.17	1337.96	96.47	40.82	1530.32	274.99	23.69	802.41
Am_HQ_90219	C:GO:0009522; P:GO:0015979; C:GO:0016021; F:GO:0016491	C:photosystem I; P:photosynthesis; C:integral component of membrane; F:oxidoreductase activity	K02698	psaK; photosystem I subunit X	A 9100 Metabolism; B 09102 Energy metabolism; C 00195 Photosynthesis [PATH:ko00195]	1082.43	-11.5594	1.06223	-10.8822	1.40178e-27	5.6117e-26	1082.43	-10.5741	1.06236	-9.95346	2.4356e-23	1.02518e-21	1082.43	-9.54833	1.0626	-8.98581	2.5683e-19	1.17504e-17	1	1	0	2217	2466	3439	1640	1147	1143	732	571	705
Am_HQ_11598	C:GO:0016021; F:GO:0016740	C:integral component of membrane; F:transferase activity	.	.	.	231.87	6.41325	0.872229	7.35272	1.9422e-13	2.0885e-12	231.87	5.37695	0.854035	6.29594	3.05552e-10	2.53838e-09	231.87	6.13887	0.865773	7.09062	1.33509e-12	2.48549e-11	847	359	885	1	6	29	19	26	24	4	26	11
Am_HQ_62776	P:GO:0006629; P:GO:0010345; P:GO:0035336; F:GO:0080019; F:GO:0102965	P:lipid metabolic process; P:suberin biosynthetic process; P:long-chain fatty-acyl-CoA metabolic process; F:fatty-acyl-CoA reductase (alcohol-forming) activity; F:alcohol-forming fatty acyl-CoA reductase activity	K13356	FAR; alcohol-forming fatty acyl-CoA reductase [EC:1.2.1.84]	A 9100 Metabolism; B 09103 Lipid metabolism; C 00073 Cutin, suberine and wax biosynthesis [PATH:ko00073]|A 9140 Cellular Processes; B 09141 Transport and catabolism; C 04146 Peroxisome [PATH:ko04146]|A 9150 Organismal Systems; B 09149 Aging; C 04212 Longevity regulating pathway - worm [PATH:ko04212]	196.799	-10.9822	1.74804	-6.28256	3.33041e-10	2.41772e-09	196.799	-9.47105	1.7488	-5.41575	6.10322e-08	3.51039e-07	196.799	-9.53441	1.74872	-5.45221	4.97471e-08	4.27581e-07	0	0	0	493.74	883.94	41.8	193.63	280.02	27.5	271.56	256.29	13.38
Am_HQ_43919	C:GO:0005576; C:GO:0005618; P:GO:0005982; P:GO:0005985; C:GO:0016021; F:GO:0030599; P:GO:0042545; P:GO:0043086; F:GO:0045330; P:GO:0045490; F:GO:0046910	C:extracellular region; C:cell wall; P:starch metabolic process; P:sucrose metabolic process; C:integral component of membrane; F:pectinesterase activity; P:cell wall modification; P:negative regulation of catalytic activity; F:aspartyl esterase activity; P:pectin catabolic process; F:pectinesterase inhibitor activity	K01051	E3.1.1.11; pectinesterase [EC:3.1.1.11]	A 9100 Metabolism; B 09101 Carbohydrate metabolism; C 00040 Pentose and glucuronate interconversions [PATH:ko00040]|A 9130 Environmental Information Processing; B 09132 Signal transduction; C 02020 Two-component system [PATH:ko02020]	292.612	3.13309	1.30403	2.40262	0.0162782	0.0317293	292.612	-2.99532	1.28737	-2.32669	0.0199816	0.0377139	292.612	6.12468	1.41472	4.32926	1.49612e-05	7.31604e-05	59	39	213	0	43	3	2224	472	322	2	3	1
Am_HQ_12546	F:GO:0003729	F:mRNA binding	.	.	.	211.351	2.2822	2.931	0.778643	0.43619	0.534664	211.351	1.976	2.93081	0.674216	0.500174	0.594659	211.351	2.29	2.931	0.781304	0.434624	0.553779	892.05	266.42	0	178.99	141.94	0	210.13	180.54	0	168	165.95	0
Am_HQ_77092	C:GO:0016021	C:integral component of membrane	.	.	.	866.365	2.66207	0.818971	3.25051	0.00115197	0.00293851	866.365	2.18281	0.818696	2.6662	0.00767147	0.0161114	866.365	6.09603	0.828581	7.35719	1.87825e-13	4.04538e-12	790	1271	4052	259	724	272	214	642	1002	20	84	14
Am_HQ_1255	F:GO:0004222; C:GO:0009570; P:GO:0016485; F:GO:0046872	F:metalloendopeptidase activity; C:chloroplast stroma; P:protein processing; F:metal ion binding	.	.	.	181.507	-0.441939	1.56349	-0.282663	0.777435	0.836261	181.507	1.00065	1.56462	0.639547	0.522467	0.616285	181.507	1.89552	1.56609	1.21035	0.226143	0.329834	124.06	106.34	332.65	271.43	309.33	461.44	0	291.44	104.16	0	115.98	90.39
Am_HQ_7665	F:GO:0004672; F:GO:0005524; C:GO:0005886; P:GO:0006468; C:GO:0016021	F:protein kinase activity; F:ATP binding; C:plasma membrane; P:protein phosphorylation; C:integral component of membrane	.	.	.	541.953	-8.37143	0.873148	-9.58764	9.01217e-22	2.24522e-20	541.953	-8.07929	0.87331	-9.25134	2.2169e-20	6.8612e-19	541.953	-9.52034	0.872769	-10.9082	1.05317e-27	1.15786e-25	1	2.66	0	251.71	833.31	674.88	282.09	594.59	572.71	883.78	1493.41	1539.11
Am_HQ_31001	F:GO:0016758	F:hexosyltransferase activity	.	.	.	134.035	-1.27837	1.90566	-0.670827	0.502331	0.599153	134.035	-5.45418	1.89987	-2.87082	0.00409415	0.00919343	134.035	6.07367	2.23512	2.71738	0.00658018	0.0162722	22.64	0	2.47	0	81.8	3.83	548.24	540.32	501.64	0	0	0
Am_HQ_12563	F:GO:0016787; F:GO:0043531	F:hydrolase activity; F:ADP binding	.	.	.	706.2	-0.77447	0.758952	-1.02045	0.307517	0.400868	706.2	1.17804	0.760263	1.54951	0.121258	0.182098	706.2	-0.996346	0.758884	-1.31291	0.189213	0.285253	353.54	259.77	709.74	2066.19	360.86	526.72	182.78	278.44	337.03	2332.03	637.2	577.73
Am_HQ_61395	F:GO:0004650; C:GO:0005576; P:GO:0005982; P:GO:0005985; P:GO:0071555	F:polygalacturonase activity; C:extracellular region; P:starch metabolic process; P:sucrose metabolic process; P:cell wall organization	.	.	.	26.3648	0.36741	0.951256	0.386237	0.699321	0.772755	26.3648	-2.91928	0.916066	-3.18675	0.00143879	0.00359381	26.3648	6.06702	1.48968	4.07269	4.64726e-05	0.000202037	10	17	1	7	15	6	91	79	105	0	0	0
Am_HQ_65104	P:GO:0006633; C:GO:0016021; F:GO:0016747	P:fatty acid biosynthetic process; C:integral component of membrane; F:acyltransferase activity, transferring groups other than amino-acyl groups	K15397	KCS; 3-ketoacyl-CoA synthase [EC:2.3.1.199]	A 9100 Metabolism; B 09103 Lipid metabolism; C 00062 Fatty acid elongation [PATH:ko00062]|A 9150 Organismal Systems; B 09159 Environmental adaptation; C 04626 Plant-pathogen interaction [PATH:ko04626]	326.247	-10.9542	1.23139	-8.8958	5.80022e-19	1.10209e-17	326.247	-11.5737	1.2312	-9.40039	5.43599e-21	1.82283e-19	326.247	-9.50761	1.23238	-7.71484	1.21131e-14	3.13437e-13	0	0	0	538.25	507.15	399.02	473.29	754.95	1059.69	230.3	167.93	139.7
Am_HQ_12570	F:GO:0003724; F:GO:0003729; F:GO:0003743; F:GO:0005524; C:GO:0005730; C:GO:0005840; P:GO:0006446; F:GO:0016787; C:GO:0071013	F:RNA helicase activity; F:mRNA binding; F:translation initiation factor activity; F:ATP binding; C:nucleolus; C:ribosome; P:regulation of translational initiation; F:hydrolase activity; C:catalytic step 2 spliceosome	K13025	EIF4A3, FAL1; ATP-dependent RNA helicase [EC:3.6.4.13]	A 9120 Genetic Information Processing; B 09121 Transcription; C 03040 Spliceosome [PATH:ko03040]|A 9120 Genetic Information Processing; B 09122 Translation; C 03013 Nucleocytoplasmic transport [PATH:ko03013]|A 9120 Genetic Information Processing; B 09122 Translation; C 03015 mRNA surveillance pathway [PATH:ko03015]	651.721	0.514405	2.65487	0.193759	0.846364	0.889782	651.721	1.16967	2.65497	0.44056	0.659532	0.739819	651.721	0.844059	2.65491	0.317924	0.750543	0.828571	1358.72	922.99	1.09	659.13	1426.1	0	327.13	1043.23	1.1	476.51	1254.44	0
Am_HQ_12573	F:GO:0003676	F:nucleic acid binding	K22381	ZNF598; E3 ubiquitin-protein ligase ZNF598 [EC:2.3.2.27]	None	683.707	1.58589	1.10538	1.4347	0.151373	0.221189	683.707	1.69666	1.10544	1.53483	0.124826	0.186694	683.707	1.37217	1.10528	1.24147	0.214434	0.316093	1819.13	1263.9	115.29	883.96	412.06	96.86	641.84	522.31	109.89	1147.47	440.78	89.85
Am_HQ_12578	F:GO:0003723; F:GO:0004386; F:GO:0005524; C:GO:0005681; F:GO:0016787	F:RNA binding; F:helicase activity; F:ATP binding; C:spliceosomal complex; F:hydrolase activity	K12813	DHX16; pre-mRNA-splicing factor ATP-dependent RNA helicase DHX16 [EC:3.6.4.13]	A 9120 Genetic Information Processing; B 09121 Transcription; C 03040 Spliceosome [PATH:ko03040]	261.607	-0.105994	0.643098	-0.164817	0.869088	0.906286	261.607	0.32676	0.643712	0.507619	0.611721	0.698486	261.607	0.0966504	0.643332	0.150234	0.88058	0.923385	442.39	105.63	79.66	438.31	258.63	249.09	227.86	239.48	237	308.36	294.16	237.3
Am_HQ_89339	C:GO:0016021	C:integral component of membrane	.	.	.	3086.39	-7.57123	2.30317	-3.28731	0.00101149	0.00261609	3086.39	-11.7808	2.30296	-5.11552	3.12875e-07	1.60639e-06	3086.39	3.43437	2.58672	1.32769	0.184279	0.279177	2	1	5	1	1963	0	17192	10573	8629	0	1	0
Am_HQ_77041	F:GO:0003824; P:GO:0005975; F:GO:0030246	F:catalytic activity; P:carbohydrate metabolic process; F:carbohydrate binding	.	.	.	151.929	-10.507	1.23802	-8.48688	2.12261e-17	3.46421e-16	151.929	-8.97742	1.23953	-7.24261	4.40141e-13	5.51375e-12	151.929	-9.50107	1.2388	-7.66958	1.72556e-14	4.35789e-13	0	0	0	331	274	482	66	154	159	204	129	206
Am_HQ_1259	F:GO:0003684; C:GO:0005634; P:GO:0006281; P:GO:0043161	F:damaged DNA binding; C:nucleus; P:DNA repair; P:proteasome-mediated ubiquitin-dependent protein catabolic process	K12830	SF3B3, SAP130, RSE1; splicing factor 3B subunit 3	A 9120 Genetic Information Processing; B 09121 Transcription; C 03040 Spliceosome [PATH:ko03040]	791.65	-0.26918	0.228251	-1.17931	0.238273	0.324282	791.65	-0.105584	0.228474	-0.46213	0.643988	0.726583	791.65	-0.394803	0.228094	-1.73088	0.0834729	0.144436	390	712	605	815	867	1031	521	900	1025	839	983	1156
Am_HQ_12594	F:GO:0001664; F:GO:0003924; F:GO:0005525; C:GO:0005834; P:GO:0007188; F:GO:0031683	F:G protein-coupled receptor binding; F:GTPase activity; F:GTP binding; C:heterotrimeric G-protein complex; P:adenylate cyclase-modulating G protein-coupled receptor signaling pathway; F:G-protein beta/gamma-subunit complex binding	.	.	.	134.96	2.00863	1.40256	1.43211	0.152112	0.222136	134.96	-0.244147	1.39633	-0.174849	0.861198	0.899587	134.96	-1.1336	1.39554	-0.812307	0.416616	0.535753	87.46	135.17	65.58	0	0	105.27	151.61	109.33	184.24	344.02	219.68	273.89
Am_HQ_76418	F:GO:0004318; C:GO:0005835; P:GO:0006633; P:GO:0006807; P:GO:0009610; F:GO:0016631; F:GO:0018580; P:GO:0042967; P:GO:0046686; F:GO:0051213	F:enoyl-[acyl-carrier-protein] reductase (NADH) activity; C:fatty acid synthase complex; P:fatty acid biosynthetic process; P:nitrogen compound metabolic process; P:response to symbiotic fungus; F:enoyl-[acyl-carrier-protein] reductase activity; F:nitronate monooxygenase activity; P:obsolete acyl-carrier-protein biosynthetic process; P:response to cadmium ion; F:dioxygenase activity	.	.	.	9955.88	5.70251	0.549385	10.3798	3.06406e-25	1.0259e-23	9955.88	3.50717	0.548716	6.3916	1.64158e-10	1.4115e-09	9955.88	6.06382	0.549617	11.0328	2.65446e-28	3.02363e-26	33521.1	23620.5	27842	300.34	548.98	1474.33	1417.14	3517.31	5605.36	642.4	399.09	703.1
Am_HQ_44364	.	.	K13424	WRKY33; WRKY transcription factor 33	A 9130 Environmental Information Processing; B 09132 Signal transduction; C 04016 MAPK signaling pathway - plant [PATH:ko04016]|A 9150 Organismal Systems; B 09159 Environmental adaptation; C 04626 Plant-pathogen interaction [PATH:ko04626]	136.953	2.84007	0.724481	3.92015	8.84956e-05	0.000283129	136.953	3.44502	0.728339	4.72997	2.24557e-06	9.96595e-06	136.953	6.04857	0.781067	7.74399	9.63433e-15	2.5255e-13	207.67	249.07	616.58	80.27	38.65	81.77	8.62	51.07	78.34	3.15	6.49	13.45
Am_HQ_1260	C:GO:0005794; C:GO:0005829; C:GO:0005905; P:GO:0006898; C:GO:0009506; C:GO:0009507; C:GO:0030659; F:GO:0032051; C:GO:0071439	C:Golgi apparatus; C:cytosol; C:clathrin-coated pit; P:receptor-mediated endocytosis; C:plasmodesma; C:chloroplast; C:cytoplasmic vesicle membrane; F:clathrin light chain binding; C:clathrin complex	K04646	CLTC; clathrin heavy chain	A 9140 Cellular Processes; B 09141 Transport and catabolism; C 04144 Endocytosis [PATH:ko04144]|A 9140 Cellular Processes; B 09141 Transport and catabolism; C 04142 Lysosome [PATH:ko04142]|A 9150 Organismal Systems; B 09155 Excretory system; C 04961 Endocrine and other factor-regulated calcium reabsorption [PATH:ko04961]|A 9150 Organismal Systems; B 09156 Nervous system; C 04721 Synaptic vesicle …	173.575	0.105131	0.73226	0.14357	0.88584	0.91933	173.575	0.64331	0.733208	0.877392	0.380274	0.475219	173.575	1.2576	0.734691	1.71173	0.0869456	0.149647	118.45	246.3	213.62	151.56	224.59	339.76	125.42	170.25	190.53	218.56	80.09	13.83
Am_HQ_12606	.	.	.	.	.	248.307	-3.41315	1.07562	-3.17319	0.00150776	0.00375209	248.307	-0.107237	1.07929	-0.0993589	0.920853	0.943895	248.307	-0.812752	1.07767	-0.754178	0.450742	0.569302	38.39	122.13	14.54	789.84	516.21	1107.52	0.77	58.18	201.37	66.31	160.89	170.16
Am_HQ_12607	C:GO:0005680; P:GO:0031145; P:GO:0045842; F:GO:0061630; P:GO:0070979	C:anaphase-promoting complex; P:anaphase-promoting complex-dependent catabolic process; P:positive regulation of mitotic metaphase/anaphase transition; F:ubiquitin protein ligase activity; P:protein K11-linked ubiquitination	K03352	APC5, ANAPC5; anaphase-promoting complex subunit 5	A 9120 Genetic Information Processing; B 09123 Folding, sorting and degradation; C 04120 Ubiquitin mediated proteolysis [PATH:ko04120]|A 9140 Cellular Processes; B 09143 Cell growth and death; C 04110 Cell cycle [PATH:ko04110]|A 9140 Cellular Processes; B 09143 Cell growth and death; C 04111 Cell cycle - yeast [PATH:ko04111]|A 9140 Cellular Processes; B 09143 Cell growth and death; C 04113 Meiosi…	107.724	0.246982	0.675825	0.365452	0.714774	0.785551	107.724	0.274808	0.675998	0.406522	0.684359	0.760445	107.724	-0.816143	0.672768	-1.21311	0.225087	0.328706	128.45	77.03	25.16	49.48	119.34	99.87	39.33	95.79	135.04	145.3	124.21	297.59
Am_HQ_1261	F:GO:0004842; P:GO:0016567; F:GO:0016746; F:GO:0016874	F:ubiquitin-protein transferase activity; P:protein ubiquitination; F:acyltransferase activity; F:ligase activity	.	.	.	832.981	-0.573275	0.378715	-1.51374	0.130093	0.19473	832.981	0.146529	0.379279	0.386336	0.699248	0.77314	832.981	-0.655792	0.37866	-1.73188	0.0832952	0.144218	644.81	696.63	287.53	1030.84	1036.93	1182.65	773.84	544.55	597.77	1459.24	884.05	1114.67
Am_HQ_81919	P:GO:0019530; F:GO:0047800	P:taurine metabolic process; F:cysteamine dioxygenase activity	K23953	PCO; plant cysteine oxidase [EC:1.13.11.-]	None	1559.85	12.2711	0.838289	14.6383	1.60065e-48	2.31185e-46	1559.85	7.53181	0.453609	16.6042	6.49749e-62	3.88058e-59	1559.85	6.0426	0.439328	13.7542	4.8066e-43	1.58532e-40	3789	8227	3282	0	4	0	23	35	51	109	69	127
Am_HQ_55827	.	.	.	.	.	204.948	-6.82386	2.1022	-3.24606	0.00117015	0.00298041	204.948	-11.7752	2.09644	-5.61675	1.94579e-08	1.2205e-07	204.948	0	2.40453	0	1	1	0	0	0	0	36	51	1814	224	284	0	0	0
Am_HQ_78631	P:GO:0009813; F:GO:0016210	P:flavonoid biosynthetic process; F:naringenin-chalcone synthase activity	K00660	CHS; chalcone synthase [EC:2.3.1.74]	A 9100 Metabolism; B 09110 Biosynthesis of other secondary metabolites; C 00941 Flavonoid biosynthesis [PATH:ko00941]|A 9150 Organismal Systems; B 09159 Environmental adaptation; C 04712 Circadian rhythm - plant [PATH:ko04712]	779.898	6.94717	1.01071	6.87354	6.26282e-12	5.63043e-11	779.898	7.38482	1.01546	7.27241	3.53139e-13	4.47202e-12	779.898	6.04053	1.00459	6.01293	1.82196e-09	2.04045e-08	4433.28	1806.5	802	49.23	24	3	34.21	11	10	106.26	22	21
Am_HQ_54000	.	.	.	.	.	236.544	-11.7499	1.24674	-9.42452	4.32071e-21	1.01358e-19	236.544	-5.09509	1.27939	-3.98243	6.82154e-05	0.00022951	236.544	-9.44728	1.24802	-7.56982	3.73748e-14	8.96751e-13	0	0	0	828	618	1124	8	9	8	239	101	178
Am_HQ_56435	P:GO:0003333; C:GO:0005886; F:GO:0015171; C:GO:0016021	P:amino acid transmembrane transport; C:plasma membrane; F:amino acid transmembrane transporter activity; C:integral component of membrane	.	.	.	146.324	3.1647	0.743786	4.25485	2.09191e-05	7.57822e-05	146.324	5.62842	0.826803	6.80745	9.9343e-12	1.03943e-10	146.324	-0.833079	0.725504	-1.14828	0.250855	0.35968	94	377	46	31	8	35	5	4	4	287	413	478
Am_HQ_12632	.	.	.	.	.	266.26	-1.60136	0.457851	-3.49756	0.000469539	0.00130481	266.26	0.146675	0.461102	0.318096	0.750412	0.81483	266.26	-0.427621	0.459529	-0.930565	0.352079	0.470391	224	95	78	645	479	539	113	163	229	214	283	250
Am_HQ_78046	C:GO:0005886; P:GO:0008643; C:GO:0016021	C:plasma membrane; P:carbohydrate transport; C:integral component of membrane	K15382	SLC50A, SWEET; solute carrier family 50 (sugar transporter)	None	528.115	-12.1699	1.33438	-9.12026	7.49476e-20	1.56687e-18	528.115	-11.9746	1.33442	-8.97364	2.86873e-19	7.76877e-18	528.115	-9.43579	1.33567	-7.06449	1.61213e-12	2.96133e-11	0	0	0	1334	619	1478	248	1483	1361	120	155	243
Am_HQ_12639	P:GO:0006355; F:GO:0008270	P:regulation of transcription, DNA-templated; F:zinc ion binding	K17604	ZSWIM3; zinc finger SWIM domain-containing protein 3	None	185.567	-0.0471071	0.421541	-0.11175	0.911022	0.938338	185.567	0.687385	0.423956	1.62136	0.10494	0.160649	185.567	0.10225	0.421888	0.242362	0.808499	0.871666	156.54	242.97	110.92	175.84	284.99	233.78	57.6	178.17	194.92	184.72	220.57	227.37
Am_HQ_86967	F:GO:0016787	F:hydrolase activity	.	.	.	4599.64	5.63706	0.674872	8.35279	6.66716e-17	1.03681e-15	4599.64	3.46198	0.673746	5.1384	2.77087e-07	1.43196e-06	4599.64	6.02706	0.675301	8.925	4.45709e-19	1.96986e-17	5381	3458	30789	366	337	362	1005	1430	2495	227	265	332
Am_HQ_45028	.	.	.	.	.	30.4362	-3.0306	1.80479	-1.6792	0.0931128	0.1468	30.4362	-1.1378	1.81037	-0.628487	0.529685	0.623036	30.4362	5.99089	2.15348	2.78196	0.00540319	0.0137036	3.95	24.17	0	102.88	88.99	91.02	23.42	0	55.35	0	0	0.29
Am_HQ_51504	F:GO:0008318; P:GO:0018342; P:GO:0018342	F:protein prenyltransferase activity; P:protein prenylation; P:protein prenylation	K05955	FNTA; protein farnesyltransferase/geranylgeranyltransferase type-1 subunit alpha [EC:2.5.1.58 2.5.1.59]	A 9100 Metabolism; B 09109 Metabolism of terpenoids and polyketides; C 00900 Terpenoid backbone biosynthesis [PATH:ko00900]	85.8635	-9.443	1.72607	-5.47082	4.47959e-08	2.43817e-07	85.8635	-7.02427	1.73125	-4.05734	4.96346e-05	0.000172132	85.8635	-9.43018	1.72607	-5.4634	4.67102e-08	4.05262e-07	0	0	0	78.03	339.5	81.81	0	49.03	53.02	130.71	234.2	145.62
Am_HQ_1265	.	.	K13217	PRPF39, PRP39; pre-mRNA-processing factor 39	None	759.253	-0.163548	0.353645	-0.462465	0.643748	0.725386	759.253	0.513207	0.354257	1.44869	0.147425	0.215092	759.253	0.134525	0.35386	0.380165	0.703823	0.792312	777.45	668.93	515.03	1089.94	932.35	921.61	292.94	834.34	773.71	675.13	919.38	836.77
Am_HQ_12657	P:GO:0006554; F:GO:0018024; C:GO:0031519; P:GO:0034968	P:lysine catabolic process; F:histone-lysine N-methyltransferase activity; C:PcG protein complex; P:histone lysine methylation	.	.	.	142.333	0.250813	1.20746	0.20772	0.835448	0.881354	142.333	0.600168	1.20801	0.496824	0.619313	0.705297	142.333	0.060677	1.2072	0.0502626	0.959913	0.979143	67.3	107.94	230.27	184.62	65.31	205.57	0	153.88	224.48	326.26	93.34	93.31
Am_HQ_17207	P:GO:0006071; F:GO:0008889; P:GO:0009395; P:GO:0046486	P:glycerol metabolic process; F:glycerophosphodiester phosphodiesterase activity; P:phospholipid catabolic process; P:glycerolipid metabolic process	.	.	.	227.142	-11.4182	1.26876	-8.99947	2.26817e-19	4.48318e-18	227.142	-9.21535	1.27025	-7.25477	4.02355e-13	5.06623e-12	227.142	-9.40669	1.26998	-7.40697	1.29221e-13	2.85838e-12	0	0	0	462.53	1048.99	473	139	153	141	165	110	232
Am_HQ_65841	F:GO:0004190; P:GO:0006508; P:GO:0030163	F:aspartic-type endopeptidase activity; P:proteolysis; P:protein catabolic process	.	.	.	6999.92	6.96777	0.514098	13.5534	7.5647e-42	7.49618e-40	6999.92	4.96067	0.511886	9.69096	3.29406e-22	1.24219e-20	6999.92	5.96683	0.512605	11.6402	2.57399e-31	3.95e-29	16944	22569	25470	115	179	422	436	881	1549	395	275	733
Am_HQ_60362	F:GO:0016758	F:hexosyltransferase activity	K13496	UGT73C; UDP-glucosyltransferase 73C [EC:2.4.1.-]	A 9100 Metabolism; B 09109 Metabolism of terpenoids and polyketides; C 00908 Zeatin biosynthesis [PATH:ko00908]	865.191	2.78689	0.80591	3.45807	0.00054406	0.00148832	865.191	4.95236	0.809251	6.11968	9.37643e-10	7.26509e-09	865.191	5.95391	0.813353	7.3202	2.476e-13	5.24589e-12	3471.01	1209.51	2101.16	532	326.07	510.54	29	87.03	205	21	14	122.02
Am_HQ_46093	F:GO:0004322; F:GO:0005507; C:GO:0005886; P:GO:0006826; P:GO:0015994; C:GO:0016021; F:GO:0052716; P:GO:0055072	F:ferroxidase activity; F:copper ion binding; C:plasma membrane; P:iron ion transport; P:chlorophyll metabolic process; C:integral component of membrane; F:hydroquinone:oxygen oxidoreductase activity; P:iron ion homeostasis	.	.	.	136.685	5.28212	1.33307	3.96238	7.4206e-05	0.000241148	136.685	5.54793	1.33746	4.14812	3.3522e-05	0.000120431	136.685	2.72412	1.31587	2.0702	0.038434	0.0745602	18.82	648.9	510	30.24	6.37	0	3.75	10.46	19.44	148.7	14.79	60.8
Am_HQ_62531	F:GO:0004497; F:GO:0005506; C:GO:0016021; F:GO:0016705; F:GO:0020037	F:monooxygenase activity; F:iron ion binding; C:integral component of membrane; F:oxidoreductase activity, acting on paired donors, with incorporation or reduction of molecular oxygen; F:heme binding	.	.	.	183.803	2.11516	1.17104	1.80623	0.0708829	0.115993	183.803	3.3875	1.17416	2.88505	0.00391351	0.00881827	183.803	5.9514	1.19918	4.96288	6.94541e-07	4.63544e-06	568.08	103.45	607.92	108.09	47.92	273.86	70.5	0	97.78	11.04	7.75	10.24
Am_HQ_90220	.	.	.	.	.	3072.68	6.75787	0.516922	13.0733	4.67986e-39	4.00835e-37	3072.68	5.82162	0.514222	11.3212	1.03045e-29	7.90654e-28	3072.68	5.93448	0.514402	11.5367	8.62064e-31	1.29591e-28	7423	6441	14666	111	137	103	186	187	308	382	112	132
Am_HQ_1271	F:GO:0005488	F:binding	.	.	.	108.935	-1.17332	0.746042	-1.57273	0.115782	0.176391	108.935	0.127778	0.749269	0.170538	0.864587	0.902282	108.935	0.343593	0.750009	0.458118	0.646868	0.746487	33	22	158	217	243	177	54	140	69	76	110	39
Am_HQ_12716	P:GO:0006012; P:GO:0009312; F:GO:0047268	P:galactose metabolic process; P:oligosaccharide biosynthetic process; F:galactinol-raffinose galactosyltransferase activity	K06611	E2.4.1.67; stachyose synthetase [EC:2.4.1.67]	A 9100 Metabolism; B 09101 Carbohydrate metabolism; C 00052 Galactose metabolism [PATH:ko00052]	151.695	0.348467	0.959913	0.36302	0.71659	0.787116	151.695	-0.385799	0.958381	-0.402553	0.687277	0.763073	151.695	-1.30061	0.95724	-1.3587	0.17424	0.266775	157.26	93.18	6.91	154.67	89.14	22.61	181.42	179.24	87.98	150.04	292.93	447.44
Am_HQ_12717	F:GO:0003723; F:GO:0004386; C:GO:0005829; P:GO:0009616; F:GO:0016787; P:GO:0035194; C:GO:0043186	F:RNA binding; F:helicase activity; C:cytosol; P:RNAi-mediated antiviral immune response; F:hydrolase activity; P:post-transcriptional gene silencing by RNA; C:P granule	K18422	MOV10; helicase MOV-10 [EC:3.6.4.13]	None	249.503	0.617355	0.304171	2.02963	0.0423939	0.0740043	249.503	0.527587	0.303893	1.7361	0.0825467	0.130248	249.503	-0.0245977	0.302169	-0.0814039	0.935121	0.962473	313	224	173	213	224	187	173	234	265	319	294	378
Am_HQ_12718	F:GO:0008237; C:GO:0016020	F:metallopeptidase activity; C:membrane	K23010	OMA1; metalloendopeptidase OMA1, mitochondrial [EC:3.4.24.-]	A 9160 Human Diseases; B 09164 Neurodegenerative disease; C 05017 Spinocerebellar ataxia [PATH:ko05017]	253.393	-0.884322	0.325768	-2.71458	0.00663605	0.0142858	253.393	0.0014487	0.328028	0.0044164	0.996476	0.99765	253.393	-0.174229	0.327385	-0.532186	0.594597	0.701218	183.35	200.24	113.42	406.56	362.63	457.2	115.27	286.99	274.45	238.01	237.75	279.05
Am_HQ_81835	C:GO:0009535; C:GO:0009654; P:GO:0010207; F:GO:0010242; P:GO:0042549	C:chloroplast thylakoid membrane; C:photosystem II oxygen evolving complex; P:photosystem II assembly; F:oxygen evolving activity; P:photosystem II stabilization	K02716	psbO; photosystem II oxygen-evolving enhancer protein 1	A 9100 Metabolism; B 09102 Energy metabolism; C 00195 Photosynthesis [PATH:ko00195]	9338.63	-10.5157	0.896316	-11.7321	8.72382e-32	4.53597e-30	9338.63	-9.2685	0.896341	-10.3404	4.62753e-25	2.28257e-23	9338.63	-9.40368	0.896337	-10.4912	9.47757e-26	8.47916e-24	1	35.32	0	19861.9	20496.3	24340.2	7915.96	9094.77	10048.7	10332	10687.9	8963.73
Am_HQ_12724	P:GO:0045132; P:GO:0060623; P:GO:0071922	P:meiotic chromosome segregation; P:regulation of chromosome condensation; P:regulation of cohesin loading	K25163	WAPL; wings apart-like protein	None	207.248	0.458551	1.53585	0.298565	0.765272	0.826095	207.248	0.737316	1.53608	0.479998	0.631229	0.715389	207.248	0.709839	1.53603	0.462125	0.643992	0.744187	334.11	338.45	9.59	325.63	302.43	3.64	210.5	301.83	13.57	231.73	320.12	3.25
Am_HQ_12725	P:GO:0000463; P:GO:0000466; C:GO:0005654; C:GO:0030687; F:GO:0043021; C:GO:0070545	P:maturation of LSU-rRNA from tricistronic rRNA transcript (SSU-rRNA, 5.8S rRNA, LSU-rRNA); P:maturation of 5.8S rRNA from tricistronic rRNA transcript (SSU-rRNA, 5.8S rRNA, LSU-rRNA); C:nucleoplasm; C:preribosome, large subunit precursor; F:ribonucleoprotein complex binding; C:PeBoW complex	K14824	ERB1, BOP1; ribosome biogenesis protein ERB1	None	221.157	0.168594	1.11114	0.151731	0.879399	0.914191	221.157	0.828524	1.11177	0.74523	0.456133	0.551583	221.157	1.20667	1.11223	1.08491	0.277961	0.389819	475.32	41.67	177.66	364.07	45.29	504.14	102.31	26.62	459.13	173.13	41.3	224.89
Am_HQ_12736	C:GO:0005743; P:GO:0006784; C:GO:0016021; F:GO:0016627; F:GO:0016653	C:mitochondrial inner membrane; P:heme A biosynthetic process; C:integral component of membrane; F:oxidoreductase activity, acting on the CH-CH group of donors; F:oxidoreductase activity, acting on NAD(P)H, heme protein as acceptor	K02259	COX15, ctaA; heme a synthase [EC:1.17.99.9]	A 9100 Metabolism; B 09102 Energy metabolism; C 00190 Oxidative phosphorylation [PATH:ko00190]|A 9100 Metabolism; B 09108 Metabolism of cofactors and vitamins; C 00860 Porphyrin metabolism [PATH:ko00860]|A 9130 Environmental Information Processing; B 09132 Signal transduction; C 02020 Two-component system [PATH:ko02020]|A 9150 Organismal Systems; B 09159 Environmental adaptation; C 04714 Thermoge…	190.495	-0.925471	0.389894	-2.37365	0.0176134	0.0340466	190.495	0.206479	0.393106	0.52525	0.599409	0.687341	190.495	0.139397	0.392729	0.354944	0.722632	0.806786	126.46	137.59	132.64	405.13	256.02	343.46	77.1	167.1	228.24	224.63	128.73	129.24
Am_HQ_35715	F:GO:0004672; F:GO:0005524; P:GO:0006468	F:protein kinase activity; F:ATP binding; P:protein phosphorylation	.	.	.	183.541	-3.50549	3.69141	-0.949634	0.342298	0.437872	183.541	-11.6567	3.65758	-3.187	0.00143755	0.0035911	183.541	0	3.84247	0	1	1	0	0	0	0	8	0	1597	330	224	0	0	0
Am_HQ_83147	.	.	.	.	.	183.134	-6.0312	4.2142	-1.43116	0.152384	0.22249	183.134	-11.629	4.20916	-2.76279	0.00573089	0.0124317	183.134	0	4.37077	0	1	1	0	0	0	0	46	0	1543	308	267	0	0	0
Am_HQ_82095	F:GO:0004222; P:GO:0006508; F:GO:0008270; C:GO:0016021; P:GO:0030198; P:GO:0030574; C:GO:0031012	F:metalloendopeptidase activity; P:proteolysis; F:zinc ion binding; C:integral component of membrane; P:extracellular matrix organization; P:collagen catabolic process; C:extracellular matrix	.	.	.	90.0724	3.96407	0.681356	5.81792	5.95848e-09	3.68309e-08	90.0724	2.91287	0.668558	4.35695	1.31888e-05	5.12567e-05	90.0724	5.92736	0.748785	7.91596	2.45348e-15	6.89784e-14	78	216	444	15	25	22	39	34	55	9	1	6
Am_HQ_49865	.	.	.	.	.	849.263	7.73572	0.432419	17.8894	1.42643e-71	5.43471e-69	849.263	5.77591	0.395044	14.621	2.06497e-48	6.33774e-46	849.263	5.92436	0.396237	14.9516	1.52122e-50	8.00381e-48	3126	3032	1749	16	6	29	60	57	76	50	54	73
Am_HQ_65259	.	.	K22374	DMAS1; 3''-deamino-3''-oxonicotianamine reductase [EC:1.1.1.285]	A 9100 Metabolism; B 09110 Biosynthesis of other secondary metabolites; C 00999 Biosynthesis of various plant secondary metabolites [PATH:ko00999]	94.6781	-9.62702	1.28899	-7.46864	8.10256e-14	9.07503e-13	94.6781	-7.68481	1.29299	-5.94345	2.79086e-09	2.00105e-08	94.6781	-9.39876	1.28921	-7.29031	3.09246e-13	6.41664e-12	0	0	0	209.91	95.34	289.07	57.93	45.1	45.46	195.41	98.38	209.62
Am_HQ_12761	P:GO:0030433; F:GO:0031593; F:GO:0051787; C:GO:0071818	P:ubiquitin-dependent ERAD pathway; F:polyubiquitin modification-dependent protein binding; F:misfolded protein binding; C:BAT3 complex	.	.	.	425.708	0.122483	1.81133	0.0676201	0.946088	0.963138	425.708	0.0283573	1.81131	0.0156557	0.987509	0.991187	425.708	0.0980293	1.81132	0.0541204	0.956839	0.976865	311.95	817.46	0	346.25	905.45	11	336.62	1043.49	12.03	383.93	941.61	10.54
Am_HQ_38807	F:GO:0003727; P:GO:0006397; P:GO:0006417; C:GO:0009507	F:single-stranded RNA binding; P:mRNA processing; P:regulation of translation; C:chloroplast	.	.	.	694.226	-11.9132	1.21686	-9.79014	1.24126e-22	3.31673e-21	694.226	-10.7845	1.21705	-8.86122	7.91432e-19	2.04073e-17	694.226	-9.3925	1.21758	-7.71404	1.21893e-14	3.1504e-13	0	1	0	2032.29	1492.03	2015.46	464.94	939.93	1186.39	289.79	316.45	368.07
Am_HQ_12767	C:GO:0016021; F:GO:0016757	C:integral component of membrane; F:glycosyltransferase activity	K20781	SGT1; peptidyl serine alpha-galactosyltransferase [EC:2.4.1.-]	A 9100 Metabolism; B 09107 Glycan biosynthesis and metabolism; C 00514 Other types of O-glycan biosynthesis [PATH:ko00514]	317.612	-0.00891836	0.315304	-0.0282849	0.977435	0.984968	317.612	-0.133424	0.315052	-0.423498	0.671932	0.750252	317.612	-0.273645	0.314699	-0.869548	0.384548	0.504047	170.96	372.65	191.79	234.06	322.88	420.24	256.1	373.56	430.36	314.45	350.39	510.34
Am_HQ_29736	.	.	.	.	.	85.9852	-8.8882	1.24855	-7.11881	1.08867e-12	1.07351e-11	85.9852	-8.5512	1.24921	-6.84528	7.6328e-12	8.09744e-11	85.9852	-9.38816	1.24783	-7.52357	5.3302e-14	1.25305e-12	0	0	0	87	92	178	78	94	104	103	166	232
Am_HQ_41681	F:GO:0004322; F:GO:0005507; C:GO:0005886; P:GO:0006826; P:GO:0015994; P:GO:0046274; C:GO:0048046; F:GO:0052716; P:GO:0055072	F:ferroxidase activity; F:copper ion binding; C:plasma membrane; P:iron ion transport; P:chlorophyll metabolic process; P:lignin catabolic process; C:apoplast; F:hydroquinone:oxygen oxidoreductase activity; P:iron ion homeostasis	K05909	E1.10.3.2; laccase [EC:1.10.3.2]	None	2128.29	7.64628	0.764314	10.0041	1.46199e-23	4.34235e-22	2128.29	5.01838	0.755564	6.6419	3.09661e-11	3.00259e-10	2128.29	5.91216	0.756972	7.81027	5.70635e-15	1.53219e-13	1067	5621	13521	73	29	26	214	203	403	167	69	207
Am_HQ_14581	F:GO:0004072; F:GO:0004412; P:GO:0006544; P:GO:0006563; P:GO:0006566; P:GO:0009085; P:GO:0016310; F:GO:0050661	F:aspartate kinase activity; F:homoserine dehydrogenase activity; P:glycine metabolic process; P:L-serine metabolic process; P:threonine metabolic process; P:lysine biosynthetic process; P:phosphorylation; F:NADP binding	K12524	thrA; bifunctional aspartokinase / homoserine dehydrogenase 1 [EC:2.7.2.4 1.1.1.3]	A 9100 Metabolism; B 09105 Amino acid metabolism; C 00260 Glycine, serine and threonine metabolism [PATH:ko00260]|A 9100 Metabolism; B 09105 Amino acid metabolism; C 00270 Cysteine and methionine metabolism [PATH:ko00270]|A 9100 Metabolism; B 09105 Amino acid metabolism; C 00300 Lysine biosynthesis [PATH:ko00300]|A 9100 Metabolism; B 09110 Biosynthesis of other secondary metabolites; C 00261 Mono…	42.536	-5.945	1.88441	-3.15484	0.00160585	0.00397959	42.536	-4.4066	1.90784	-2.30974	0.0209025	0.0392509	42.536	-9.38444	1.87328	-5.00962	5.45372e-07	3.72539e-06	0	0	0	9.82	10.44	27.19	0	15.54	0	85.31	237.54	174.17
Am_HQ_12780	.	.	K19513	CLEC16A; protein CLEC16A	None	364.512	-0.187837	0.141986	-1.32292	0.185862	0.263122	364.512	-0.0408642	0.142646	-0.286473	0.774516	0.833346	364.512	0.0490652	0.142923	0.343298	0.731374	0.813558	258.77	294.66	305.54	456.9	407.61	438.46	333.71	389.95	454.12	383.11	347.04	387.34
Am_HQ_12783	C:GO:0110165	C:cellular anatomical entity	.	.	.	649.72	-0.739736	0.2314	-3.19678	0.0013897	0.00348615	649.72	-0.0452579	0.232383	-0.194755	0.845584	0.88802	649.72	-0.210174	0.232064	-0.905673	0.365109	0.484118	317	635	379	1009	907	982	447	697	659	609	763	655
Am_HQ_72395	.	.	.	.	.	259.238	5.05421	0.585895	8.62648	6.32684e-18	1.09312e-16	259.238	5.53528	0.597294	9.26726	1.90987e-20	5.9695e-19	259.238	0.845657	0.558558	1.514	0.130026	0.209914	633.43	235.19	654.38	9.91	33.46	20	9	14.2	23.48	249.34	466.33	465.1
Am_HQ_1544	F:GO:0015276; C:GO:0016021; P:GO:0034220	F:ligand-gated ion channel activity; C:integral component of membrane; P:ion transmembrane transport	.	.	.	99.5984	2.88019	1.84017	1.56518	0.117542	0.178715	99.5984	5.19242	1.85538	2.79857	0.00513294	0.0112527	99.5984	5.91191	1.86695	3.16661	0.00154229	0.00455271	313.5	234.22	261.89	40.37	69.82	36.7	26.34	0	0	17.85	0	0
Am_HQ_12792	F:GO:0005524; C:GO:0005634; C:GO:0005829; P:GO:0006090; C:GO:0009570; P:GO:0015976; F:GO:0016301; P:GO:0016310; F:GO:0046872; F:GO:0050242	F:ATP binding; C:nucleus; C:cytosol; P:pyruvate metabolic process; C:chloroplast stroma; P:carbon utilization; F:kinase activity; P:phosphorylation; F:metal ion binding; F:pyruvate, phosphate dikinase activity	K01006	ppdK; pyruvate, orthophosphate dikinase [EC:2.7.9.1]	A 9100 Metabolism; B 09101 Carbohydrate metabolism; C 00010 Glycolysis / Gluconeogenesis [PATH:ko00010]|A 9100 Metabolism; B 09101 Carbohydrate metabolism; C 00620 Pyruvate metabolism [PATH:ko00620]|A 9100 Metabolism; B 09102 Energy metabolism; C 00710 Carbon fixation in photosynthetic organisms [PATH:ko00710]|A 9100 Metabolism; B 09102 Energy metabolism; C 00720 Carbon fixation pathways in proka…	220.741	-0.39751	0.241467	-1.64623	0.0997174	0.155651	220.741	0.465276	0.245196	1.89757	0.0577526	0.0957331	220.741	0.167603	0.243547	0.688174	0.491343	0.608195	178.94	158.2	205.86	274.37	347.2	340.63	187.7	171.08	159.72	209.88	236.48	208.37
Am_HQ_49222	F:GO:0005524; P:GO:0005978; P:GO:0005985; F:GO:0008878; C:GO:0009507; P:GO:0019252	F:ATP binding; P:glycogen biosynthetic process; P:sucrose metabolic process; F:glucose-1-phosphate adenylyltransferase activity; C:chloroplast; P:starch biosynthetic process	K00975	glgC; glucose-1-phosphate adenylyltransferase [EC:2.7.7.27]	A 9100 Metabolism; B 09101 Carbohydrate metabolism; C 00500 Starch and sucrose metabolism [PATH:ko00500]|A 9100 Metabolism; B 09101 Carbohydrate metabolism; C 00520 Amino sugar and nucleotide sugar metabolism [PATH:ko00520]|A 9140 Cellular Processes; B 09145 Cellular community - prokaryotes; C 02026 Biofilm formation - Escherichia coli [PATH:ko02026]	1602.51	-13.6311	1.2616	-10.8046	3.27537e-27	1.28788e-25	1602.51	-10.1937	1.26206	-8.07708	6.63385e-16	1.2016e-14	1602.51	-9.382	1.26241	-7.43179	1.07135e-13	2.39622e-12	0	0	1	7748.49	3770.71	6691.61	252.44	614.8	870.27	330.03	228.6	409.85
[truncated: 21,680 more rows]
