# Supplementary material for: Enhancing transcriptome analysis in medicinal plants: multiple unigene sets in Astragalus membranaceus
Source: Front Plant Sci. 2024 Feb 7;15:1301526. doi: 10.3389/fpls.2024.1301526 (PMC10879423; doi:10.3389/fpls.2024.1301526)
Supplement: Supplementary file 10 [file Table_9.xlsx]

## Sheet: Table S22
Supplementary Table 22. GO and KEGG annotation and analysis of DEGs (Set-2).
Unigene ID	GO information		KEGG information			DEG (Roots vs. Leaves)						DEG (Roots vs. Flowers)						DEG (Roots vs. Stems)						Read count
	GO IDs	GO Names	KO	KO Description	Pathway Description	BaseMean	log2 FC	lfcSE	Stat	pvalue	padj	BaseMean	log2 FC	lfcSE	Stat	pvalue	padj	BaseMean	log2 FC	lfcSE	Stat	pvalue	padj	Roots-1	Roots-2	Roots-3	Leaves-1	Leaves-2	Leaves-3	Flowers-1	Flowers-2	Flowers-3	Stems-1	Stems-2	Stems-3
Am_Rn_020474	.	.	.	.	.	343.962	-0.374906	0.221477	-1.69275	0.090503	0.151114	343.962	-0.501202	0.22117	-2.26614	0.0234427	0.0444785	343.962	-0.24524	0.221748	-1.10594	0.268752	0.388187	266.01	268.63	160.33	363.9	354.73	457.82	330.1	450.66	504.39	353.68	361.26	379.13
Am_Rn_000006	P:GO:0000027; F:GO:0005524; C:GO:0005634; P:GO:0006364; F:GO:0016887	P:ribosomal large subunit assembly; F:ATP binding; C:nucleus; P:rRNA processing; F:ATP hydrolysis activity	K14572	MDN1, REA1; midasin	A 9120 Genetic Information Processing; B 09122 Translation; C 03008 Ribosome biogenesis in eukaryotes [PATH:ko03008]	1208.82	0.976685	0.796763	1.22582	0.220268	0.319384	1208.82	1.62875	0.797005	2.04358	0.0409948	0.0726565	1208.82	0.611005	0.796663	0.766956	0.443108	0.572252	2391.42	1959.05	409.33	860.52	1360.89	924.71	96.86	940.72	1099.18	632.3	1363.31	2227.67
Am_Rn_051275	F:GO:0004553; C:GO:0005618; P:GO:0010411; F:GO:0016762; P:GO:0042546; C:GO:0048046; P:GO:0071555	F:hydrolase activity, hydrolyzing O-glycosyl compounds; C:cell wall; P:xyloglucan metabolic process; F:xyloglucan:xyloglucosyl transferase activity; P:cell wall biogenesis; C:apoplast; P:cell wall organization	K14504	TCH4; xyloglucan:xyloglucosyl transferase TCH4 [EC:2.4.1.207]	A 9130 Environmental Information Processing; B 09132 Signal transduction; C 04075 Plant hormone signal transduction [PATH:ko04075]	185.707	25.8149	4.2472	6.07809	1.21619e-09	9.1862e-09	185.707	25.8005	4.2472	6.07472	1.24207e-09	1.06475e-08	185.707	3.39912	4.0818	0.832751	0.404985	0.534904	651.42	372.19	627.33	0	0	0	0	0	0	207.39	0	0
Am_Rn_062717	P:GO:0006633; F:GO:0016702; P:GO:0031408; F:GO:0046872	P:fatty acid biosynthetic process; F:oxidoreductase activity, acting on single donors with incorporation of molecular oxygen, incorporation of two atoms of oxygen; P:oxylipin biosynthetic process; F:metal ion binding	K15718	LOX1_5; linoleate 9S-lipoxygenase [EC:1.13.11.58]	A 9100 Metabolism; B 09103 Lipid metabolism; C 00591 Linoleic acid metabolism [PATH:ko00591]	454.596	-19.4528	2.74766	-7.07976	1.44404e-12	1.61852e-11	454.596	-23.5085	2.7446	-8.56537	1.07729e-17	2.88813e-16	454.596	-24.472	2.7445	-8.91673	4.80238e-19	2.48993e-17	0	0	0	0	111.42	0	162.18	1549.57	274.25	143.27	3149.19	548.17
Am_Rn_090309	.	.	.	.	.	78.2049	24.0607	2.78681	8.63379	5.93496e-18	1.2251e-16	78.2049	1.49917	2.5275	0.593144	0.553085	0.6457	78.2049	1.97777	2.52816	0.782298	0.434039	0.563536	190.57	162.29	124.67	0	0	0	0	101.41	136	0	160.14	0
Am_Rn_000025	F:GO:0003676; F:GO:0003964; P:GO:0006278; P:GO:0015074	F:nucleic acid binding; F:RNA-directed DNA polymerase activity; P:RNA-templated DNA biosynthetic process; P:DNA integration	K13217	PRPF39, PRP39; pre-mRNA-processing factor 39	None	470.169	-1.62675	2.82337	-0.576174	0.564498	0.67525	470.169	-1.58744	2.82338	-0.562249	0.573946	0.664809	470.169	-1.20629	2.82343	-0.427242	0.669203	0.777483	211.62	0	262.21	581.9	0.77	1527.94	454.62	0	1551	373.36	0	1173.54
Am_Rn_040727	F:GO:0005488; P:GO:0009987; F:GO:0016491; P:GO:0050896	F:binding; P:cellular process; F:oxidoreductase activity; P:response to stimulus	K00430	E1.11.1.7; peroxidase [EC:1.11.1.7]	A 9100 Metabolism; B 09110 Biosynthesis of other secondary metabolites; C 00940 Phenylpropanoid biosynthesis [PATH:ko00940]	63.1075	1.13848	2.38719	0.476911	0.633425	0.736506	63.1075	23.1627	2.65945	8.7096	3.04959e-18	8.78099e-17	63.1075	0.098915	2.3857	0.0414617	0.966928	1	71.05	2.63	180.7	101.7	11.19	38.02	0	0	0	318.35	0	0
Am_Rn_000038	C:GO:0016021	C:integral component of membrane	K19525	VPS13A_C; vacuolar protein sorting-associated protein 13A/C	None	1788.82	0.328933	0.638039	0.515538	0.606177	0.71325	1788.82	0.926137	0.638183	1.45121	0.146722	0.219719	1788.82	0.420319	0.638049	0.658756	0.510052	0.636213	2026.18	2884	931.69	1842.76	2283.67	1786.81	230.94	1984.86	1929.7	1193.54	1951.45	2610.15
Am_Rn_013543	F:GO:0004605; C:GO:0005789; C:GO:0016021; P:GO:0016024	F:phosphatidate cytidylyltransferase activity; C:endoplasmic reticulum membrane; C:integral component of membrane; P:CDP-diacylglycerol biosynthetic process	K00981	E2.7.7.41, CDS1, CDS2, cdsA; phosphatidate cytidylyltransferase [EC:2.7.7.41]	A 9100 Metabolism; B 09103 Lipid metabolism; C 00564 Glycerophospholipid metabolism [PATH:ko00564]|A 9130 Environmental Information Processing; B 09132 Signal transduction; C 04070 Phosphatidylinositol signaling system [PATH:ko04070]	95.1592	-1.7664	2.60222	-0.678803	0.497262	0.612994	95.1592	22.0903	2.85565	7.73563	1.02895e-14	1.86194e-13	95.1592	-2.08357	2.60204	-0.800744	0.42328	0.552787	98.58	0	0	411.39	40.54	0	0	0	0	272.22	169.23	169.54
Am_Rn_000040	C:GO:0005737; P:GO:0016567; F:GO:0061630	C:cytoplasm; P:protein ubiquitination; F:ubiquitin protein ligase activity	.	.	.	820.945	0.606165	0.36131	1.67768	0.0934087	0.155235	820.945	0.670889	0.361378	1.85647	0.0633862	0.106279	820.945	0.527614	0.361215	1.46066	0.144108	0.234189	833.11	927.53	973.55	675.7	766.31	896.6	292.93	1015.93	992.31	659.88	826	1034.54
Am_Rn_082875	P:GO:0000226; F:GO:0008017; C:GO:0045298	P:microtubule cytoskeleton organization; F:microtubule binding; C:tubulin complex	K16732	PRC1, ASE1, MAP65; Ase1/PRC1/MAP65 family protein	None	53.1827	22.2631	2.43465	9.14427	6.00345e-20	1.51371e-18	53.1827	-0.923741	2.13232	-0.433209	0.664863	0.742482	53.1827	-0.402668	2.13295	-0.188785	0.850261	0.918245	0	0	125.02	0	0	0	203.01	30.13	47.1	121.34	77.94	17.06
Am_Rn_000059	C:GO:0000124; F:GO:0003712; F:GO:0004674; F:GO:0005524; C:GO:0005667; P:GO:0006281; P:GO:0006355; P:GO:0006355; P:GO:0006468; P:GO:0009069; C:GO:0035267	C:SAGA complex; F:transcription coregulator activity; F:protein serine/threonine kinase activity; F:ATP binding; C:transcription regulator complex; P:DNA repair; P:regulation of DNA-templated transcription; P:regulation of DNA-templated transcription; P:protein phosphorylation; P:serine family amino acid metabolic process; C:NuA4 histone acetyltransferase complex	K08874	TRRAP; transformation/transcription domain-associated protein	A 9160 Human Diseases; B 09172 Infectious disease: viral; C 05166 Human T-cell leukemia virus 1 infection [PATH:ko05166]	1877.53	-0.172653	0.393883	-0.438336	0.661143	0.761193	1877.53	0.664634	0.394186	1.68609	0.0917775	0.146645	1877.53	-0.148661	0.39388	-0.377428	0.705856	0.808245	1540.43	2473.82	875.88	2298.78	2302.27	2421.57	667.65	1600.13	1776.76	1684.01	2494.48	2921.43
Am_Rn_066138	P:GO:0007165	P:signal transduction	.	.	.	53.5142	21.715	4.24985	5.10959	3.22852e-07	1.69941e-06	53.5142	-1.69963	4.08404	-0.416164	0.67729	0.753355	53.5142	-0.834104	4.08457	-0.204208	0.838191	0.909302	0	0	88.4	0	0	0	319.21	0	0	171.93	31.59	0
Am_Rn_015714	.	.	K16578	CLASP1_2; CLIP-associating protein 1/2	None	86.5173	21.0149	4.25189	4.94249	7.71305e-07	3.82381e-06	86.5173	-3.29017	4.08588	-0.805254	0.420673	0.528161	86.5173	-2.61421	4.08609	-0.639782	0.522315	0.647347	45.85	0	0	0	0	0.16	554.19	0	0	373.97	29.94	0
Am_Rn_022862	F:GO:0000977; F:GO:0003700; C:GO:0005634; C:GO:0005667; P:GO:0006355; P:GO:0045944; F:GO:0046983	F:RNA polymerase II transcription regulatory region sequence-specific DNA binding; F:DNA-binding transcription factor activity; C:nucleus; C:transcription regulator complex; P:regulation of DNA-templated transcription; P:positive regulation of transcription by RNA polymerase II; F:protein dimerization activity	K09264	K09264; MADS-box transcription factor, plant	None	307.344	5.93051	3.90658	1.51808	0.128993	0.204079	307.344	4.79835	3.90423	1.22901	0.219067	0.308324	307.344	26.5539	4.07614	6.51448	7.29409e-11	1.10711e-09	754.2	990.93	1166.55	0	0	68.65	0	138.78	0	0	0	0
Am_Rn_014867	.	.	.	.	.	90.4141	6.57418	2.78961	2.35667	0.0184396	0.0378099	90.4141	2.87515	2.75694	1.04287	0.297007	0.397232	90.4141	24.8103	2.9955	8.28251	1.20602e-16	4.4834e-15	257.38	188.92	327.37	9.86	0	0	118.54	0	0	0	0	0
Am_Rn_000079	F:GO:0004842; C:GO:0016021; P:GO:0016567; F:GO:0016874	F:ubiquitin-protein transferase activity; C:integral component of membrane; P:protein ubiquitination; F:ligase activity	K10590	TRIP12; E3 ubiquitin-protein ligase TRIP12 [EC:2.3.2.26]	A 9120 Genetic Information Processing; B 09123 Folding, sorting and degradation; C 04120 Ubiquitin mediated proteolysis [PATH:ko04120]	512.341	-0.439667	1.41034	-0.311745	0.755234	0.842897	512.341	-0.187752	1.41042	-0.133118	0.8941	0.930072	512.341	-0.085782	1.41043	-0.0608196	0.951503	0.991369	0.04	631.56	543.22	225.46	730.8	1065.69	39.22	798.56	912.24	169.4	504.98	912.72
Am_Rn_077304	P:GO:0005982; P:GO:0005985; F:GO:0016157	P:starch metabolic process; P:sucrose metabolic process; F:sucrose synthase activity	K00695	SUS; sucrose synthase [EC:2.4.1.13]	A 9100 Metabolism; B 09101 Carbohydrate metabolism; C 00500 Starch and sucrose metabolism [PATH:ko00500]	313.3	20.3673	4.25502	4.78664	1.69594e-06	7.9774e-06	313.3	-5.76486	4.08885	-1.4099	0.15857	0.23472	313.3	-5.5079	4.08887	-1.34705	0.177965	0.278247	0	34.4	0	0	0	0	0	1262.92	1043.89	0	0	1919.12
Am_Rn_000084	C:GO:0005737; P:GO:0016567; F:GO:0061630	C:cytoplasm; P:protein ubiquitination; F:ubiquitin protein ligase activity	.	.	.	3243.07	0.282751	0.510877	0.553461	0.579947	0.689476	3243.07	0.71523	0.510945	1.39982	0.161568	0.23851	3243.07	0.450242	0.510895	0.88128	0.378166	0.507895	3850.38	3585.01	2673.14	3329.32	3648.32	3860.23	675.35	3935.39	3783.44	2090.6	3211.51	4620.47
Am_Rn_049341	C:GO:0016021; F:GO:0016758	C:integral component of membrane; F:hexosyltransferase activity	.	.	.	703.235	-0.141584	2.41484	-0.0586307	0.953246	0.995945	703.235	-5.79926	2.41238	-2.40396	0.0162186	0.0321278	703.235	22.1833	2.68456	8.26328	1.41724e-16	5.23537e-15	79.48	5.23	28.96	0	164.49	0	3724.84	2127.4	2562.51	0	0	0
Am_Rn_093543	.	.	.	.	.	1149.17	-10.6599	3.91012	-2.72624	0.00640612	0.0147316	1149.17	-13.3814	3.91	-3.42236	0.000620794	0.00176365	1149.17	20.4388	4.08355	5.00516	5.58167e-07	4.08978e-06	0	1	0	0	1848	0	5918	3410	2920	0	0	0
Am_Rn_000090	C:GO:0005737; P:GO:0016567; F:GO:0016874; F:GO:0061630	C:cytoplasm; P:protein ubiquitination; F:ligase activity; F:ubiquitin protein ligase activity	.	.	.	1150.96	0.231861	0.460471	0.50353	0.614591	0.720345	1150.96	0.629364	0.460665	1.36621	0.171874	0.25152	1150.96	0.356672	0.460509	0.774517	0.438625	0.567991	1295.24	1067.46	1085.85	1292.51	1280.34	1251.2	271.52	1393.05	1378.68	994.35	1142.43	1477.83
Am_Rn_069146	C:GO:0005783; P:GO:0006621; C:GO:0016021; F:GO:0046923	C:endoplasmic reticulum; P:protein retention in ER lumen; C:integral component of membrane; F:ER retention sequence binding	.	.	.	342.541	0.526428	0.223823	2.35198	0.0186737	0.0382282	342.541	-0.506371	0.22079	-2.29345	0.0218222	0.0417526	342.541	0.362946	0.223056	1.62715	0.103706	0.178431	268.87	252.93	347.49	240.53	236.5	313.18	572.55	468.93	538.37	286.88	319.98	290.87
Am_Rn_000098	.	.	.	.	.	1840.56	0.497524	0.297539	1.67213	0.0944984	0.156722	1840.56	0.3672	0.297485	1.23435	0.217073	0.305925	1840.56	0.342773	0.297454	1.15236	0.249174	0.365403	1415.78	2242.64	1984.57	1289.3	1829.86	2041.2	1036.93	2282.34	2415.34	1517.64	1754.81	2584.38
Am_Rn_008679	F:GO:0003676; F:GO:0004045	F:nucleic acid binding; F:aminoacyl-tRNA hydrolase activity	K01056	PTH1, pth, spoVC; peptidyl-tRNA hydrolase, PTH1 family [EC:3.1.1.29]	None	231.242	-1.24437	0.221985	-5.60563	2.07499e-08	1.31041e-07	231.242	-0.507201	0.224697	-2.25727	0.0239915	0.0453899	231.242	-0.283737	0.225564	-1.2579	0.208428	0.316324	151.83	115.53	110.35	384.75	380.18	405.05	179.17	279.57	245.91	201.05	210.52	203.03
Am_Rn_019330	.	.	.	.	.	313.56	3.89522	1.38663	2.80912	0.00496767	0.0117761	313.56	12.5237	1.81681	6.89323	5.45411e-12	6.84208e-11	313.56	2.60067	1.38457	1.87833	0.0603365	0.113243	96.18	727.66	1759.44	189.75	2.1	17.31	0	0	0	320.76	92.77	133.82
Am_Rn_000104	C:GO:0005737; P:GO:0016567; F:GO:0016874; F:GO:0061630	C:cytoplasm; P:protein ubiquitination; F:ligase activity; F:ubiquitin protein ligase activity	.	.	.	2368.9	-0.0622034	0.293209	-0.212147	0.831992	0.903801	2368.9	0.332848	0.293342	1.13468	0.25651	0.351362	2368.9	0.312323	0.293316	1.0648	0.286967	0.408535	2210.37	2131.05	2080.4	2755.8	2811.13	3169.51	1116.39	2684.98	3019.37	1719.38	2595.78	2578.16
Am_Rn_028501	F:GO:0004252; P:GO:0006508	F:serine-type endopeptidase activity; P:proteolysis	.	.	.	265.017	-3.10405	2.95829	-1.04927	0.294053	0.405555	265.017	-6.70096	2.95704	-2.26611	0.0234449	0.0444798	265.017	19.997	3.18291	6.28262	3.32904e-10	4.50443e-09	11.07	0	11.44	0	244.92	0	827.78	1330.54	956.37	0	0	0
Am_Rn_048847	C:GO:0016021; F:GO:0030570; P:GO:0045490; F:GO:0046872	C:integral component of membrane; F:pectate lyase activity; P:pectin catabolic process; F:metal ion binding	K01728	pel; pectate lyase [EC:4.2.2.2]	A 9100 Metabolism; B 09101 Carbohydrate metabolism; C 00040 Pentose and glucuronate interconversions [PATH:ko00040]|A 9140 Cellular Processes; B 09145 Cellular community - prokaryotes; C 02024 Quorum sensing [PATH:ko02024]	1229.28	-4.05706	2.46812	-1.64379	0.10022	0.164885	1229.28	-10.9301	2.46498	-4.43416	9.24328e-06	3.89185e-05	1229.28	18.2481	2.73195	6.67953	2.39712e-11	3.99666e-10	3	1	2	0	127	0	10508	2118	1546	0	0	0
Am_Rn_062835	F:GO:0000774; C:GO:0005759; P:GO:0006457; C:GO:0009507; F:GO:0042803; P:GO:0050790; F:GO:0051082; F:GO:0051087	F:adenyl-nucleotide exchange factor activity; C:mitochondrial matrix; P:protein folding; C:chloroplast; F:protein homodimerization activity; P:regulation of catalytic activity; F:unfolded protein binding; F:chaperone binding	K03687	GRPE; molecular chaperone GrpE	None	237.547	-1.26607	0.198151	-6.3894	1.66536e-10	1.42281e-09	237.547	-0.507405	0.201131	-2.52275	0.011644	0.0239804	237.547	-0.155497	0.202813	-0.766699	0.443261	0.572349	142.66	131.41	121.06	430.9	357.62	447.51	183.95	260.53	290.08	199.13	211.69	173.2
Am_Rn_000122	F:GO:0003924; F:GO:0005525	F:GTPase activity; F:GTP binding	K07897	RAB7A; Ras-related protein Rab-7A	A 9140 Cellular Processes; B 09141 Transport and catabolism; C 04144 Endocytosis [PATH:ko04144]|A 9140 Cellular Processes; B 09141 Transport and catabolism; C 04145 Phagosome [PATH:ko04145]|A 9140 Cellular Processes; B 09141 Transport and catabolism; C 04140 Autophagy - animal [PATH:ko04140]|A 9140 Cellular Processes; B 09141 Transport and catabolism; C 04138 Autophagy - yeast [PATH:ko04138]|A 91…	751.361	0.581632	0.763343	0.761954	0.446088	0.564811	751.361	0.355293	0.763255	0.465497	0.641576	0.722337	751.361	0.82999	0.763444	1.08717	0.276964	0.397364	1850.05	311.66	148.53	819.48	549.8	773.46	974.95	689.1	779.14	724.95	583.02	530.45
Am_Rn_059793	C:GO:0005794; P:GO:0006886; P:GO:0016192; C:GO:0030124	C:Golgi apparatus; P:intracellular protein transport; P:vesicle-mediated transport; C:AP-4 adaptor complex	K12400	AP4E1; AP-4 complex subunit epsilon-1	A 9140 Cellular Processes; B 09141 Transport and catabolism; C 04142 Lysosome [PATH:ko04142]	55.4542	19.7337	3.50807	5.62523	1.85264e-08	1.17828e-07	55.4542	-2.37405	3.30502	-0.718315	0.472563	0.577667	55.4542	-0.0879975	3.30734	-0.0266067	0.978773	1	28.22	0	45.02	0	0	0	438.6	0	0	67.74	36.82	0
Am_Rn_091681	.	.	.	.	.	13.3748	19.6176	4.02428	4.87481	1.08915e-06	5.28701e-06	13.3748	-2.63266	3.8499	-0.683826	0.494085	0.595694	13.3748	3.56706	3.97879	0.89652	0.369975	0.498943	5.05	13.78	0	0	0	0	125.89	0	0	1.62	0	0
Am_Rn_059012	.	.	.	.	.	38.5648	-5.73958	2.93169	-1.95777	0.0502568	0.0908935	38.5648	-4.46373	2.93317	-1.52181	0.128056	0.195539	38.5648	17.9595	3.15853	5.68605	1.30014e-08	1.32798e-07	0	0	5.44	38.9	74.65	252.68	0	0	158.06	0	0	0
Am_Rn_000136	F:GO:0004672; F:GO:0005524; P:GO:0006468; P:GO:0015031	F:protein kinase activity; F:ATP binding; P:protein phosphorylation; P:protein transport	K08827	PRPF4B; serine/threonine-protein kinase PRP4 [EC:2.7.11.1]	None	395.289	0.306565	0.639821	0.479141	0.631838	0.735361	395.289	0.248677	0.639776	0.388694	0.697502	0.770408	395.289	-0.000663502	0.639514	-0.00103751	0.999172	1	45.44	614.3	467.87	349.9	413.23	355.62	324.1	396.18	454.22	456.59	552.16	411.03
Am_Rn_000148	P:GO:0006355; C:GO:0016592	P:regulation of DNA-templated transcription; C:mediator complex	.	.	.	307.562	-0.127945	0.496167	-0.257868	0.796509	0.876079	307.562	0.961119	0.498418	1.92834	0.0538127	0.092224	307.562	-0.524551	0.495656	-1.0583	0.289921	0.411938	184.24	466.61	128.43	239.46	347.91	501.42	77.88	224.13	214.03	409.43	598.35	428.32
Am_Rn_049423	C:GO:0005635; P:GO:0006998; C:GO:0016021; F:GO:0043495	C:nuclear envelope; P:nuclear envelope organization; C:integral component of membrane; F:protein-membrane adaptor activity	K19347	SUN1_2; SUN domain-containing protein 1/2	None	290.386	-0.327023	0.195045	-1.67665	0.0936109	0.155512	290.386	-0.509123	0.194438	-2.61843	0.00883358	0.0187834	290.386	-0.112913	0.195761	-0.57679	0.564081	0.685367	136.49	242.71	234.31	307.66	342.94	330.76	312.54	400.04	402.88	262.23	292.62	313.04
Am_Rn_000168	C:GO:0005634	C:nucleus	.	.	.	713.943	1.40142	0.756751	1.85189	0.0640412	0.112167	713.943	0.480522	0.7563	0.63536	0.525194	0.624416	713.943	1.57987	0.756851	2.08743	0.0368495	0.07474	433.23	588.14	1904.37	377.63	364.8	719.63	122.39	1148.84	1602.16	576.16	390.71	317.94
Am_Rn_000174	F:GO:0003677; F:GO:0004386; C:GO:0005634; F:GO:0008094; C:GO:0016020; P:GO:0045944; P:GO:0051276	F:DNA binding; F:helicase activity; C:nucleus; F:ATP-dependent activity, acting on DNA; C:membrane; P:positive regulation of transcription by RNA polymerase II; P:chromosome organization	.	.	.	2360.28	0.156841	0.366462	0.427986	0.668661	0.76779	2360.28	0.806734	0.366654	2.20026	0.0277882	0.0516851	2360.28	0.572377	0.366561	1.56148	0.118411	0.199146	2514.97	2787.88	2152.41	2496.91	2966.21	3226.86	865.92	2425.9	2387.32	1285.14	2610.22	2771.63
Am_Rn_032952	F:GO:0004322; F:GO:0005507; C:GO:0005886; P:GO:0006826; P:GO:0015994; P:GO:0046274; C:GO:0048046; F:GO:0052716; P:GO:0055072	F:ferroxidase activity; F:copper ion binding; C:plasma membrane; P:iron ion transport; P:chlorophyll metabolic process; P:lignin catabolic process; C:apoplast; F:hydroquinone:oxygen oxidoreductase activity; P:iron ion homeostasis	K05909	E1.10.3.2; laccase [EC:1.10.3.2]	None	524.849	8.51282	1.46371	5.81591	6.03064e-09	4.14203e-08	524.849	5.48827	1.42862	3.84166	0.000122205	0.000407027	524.849	13.5732	1.84774	7.34585	2.04449e-13	4.74575e-12	301.43	1277.5	3588.77	16.78	0	0	55.09	48.41	39.95	0	0	0
Am_Rn_000190	F:GO:0005488; C:GO:0110165; F:GO:0140640; F:GO:0140657	F:binding; C:cellular anatomical entity; F:catalytic activity, acting on a nucleic acid; F:ATP-dependent activity	.	.	.	389.726	0.46947	0.772457	0.607762	0.543345	0.65633	389.726	0.069439	0.772096	0.0899357	0.928338	0.95566	389.726	-0.501249	0.771688	-0.649549	0.515984	0.641699	24.91	368.26	583.5	204.39	292.45	403.3	384.64	215.78	564	498.29	529.08	752.24
Am_Rn_060173	F:GO:0000149; F:GO:0005484; P:GO:0006886; P:GO:0006906; C:GO:0012505; C:GO:0016021; C:GO:0031201; P:GO:0048278	F:SNARE binding; F:SNAP receptor activity; P:intracellular protein transport; P:vesicle fusion; C:endomembrane system; C:integral component of membrane; C:SNARE complex; P:vesicle docking	K08489	STX16; syntaxin 16	A 9120 Genetic Information Processing; B 09123 Folding, sorting and degradation; C 04130 SNARE interactions in vesicular transport [PATH:ko04130]	139.485	-0.270437	0.203707	-1.32758	0.184318	0.275061	139.485	-0.509649	0.202036	-2.52256	0.0116503	0.0239902	139.485	-0.234201	0.203722	-1.14961	0.250304	0.366731	74.25	109	107.29	122	151.22	180.19	161.41	195.87	170.87	150	136.3	162.88
Am_Rn_106536	F:GO:0005507; F:GO:0016491	F:copper ion binding; F:oxidoreductase activity	.	.	.	227.892	0.0542184	0.215714	0.251344	0.801548	0.880163	227.892	-0.511513	0.21332	-2.39786	0.016491	0.032609	227.892	0.0519243	0.215523	0.240923	0.809615	0.889972	155.43	179.16	185.82	187.02	181.46	287.69	340.62	287.16	316.24	209.22	235.2	218.76
Am_Rn_073097	P:GO:0000302; C:GO:0005737; P:GO:0006457; P:GO:0009408; P:GO:0009651; F:GO:0043621; F:GO:0051082; P:GO:0051259	P:response to reactive oxygen species; C:cytoplasm; P:protein folding; P:response to heat; P:response to salt stress; F:protein self-association; F:unfolded protein binding; P:protein complex oligomerization	K13993	HSP20; HSP20 family protein	A 9120 Genetic Information Processing; B 09123 Folding, sorting and degradation; C 04141 Protein processing in endoplasmic reticulum [PATH:ko04141]	222.583	-20.5092	3.63524	-5.64177	1.68312e-08	1.0775e-07	222.583	-18.9141	3.63795	-5.19912	2.00237e-07	1.16185e-06	222.583	-24.0759	3.63403	-6.62514	3.46916e-11	5.60229e-10	0	0	0	20.76	174.05	13.07	0	73.67	0	0	2516.33	79.76
Am_Rn_000203	P:GO:0006633; F:GO:0016702; P:GO:0031408; F:GO:0046872	P:fatty acid biosynthetic process; F:oxidoreductase activity, acting on single donors with incorporation of molecular oxygen, incorporation of two atoms of oxygen; P:oxylipin biosynthetic process; F:metal ion binding	K00454	LOX2S; lipoxygenase [EC:1.13.11.12]	A 9100 Metabolism; B 09103 Lipid metabolism; C 00591 Linoleic acid metabolism [PATH:ko00591]|A 9100 Metabolism; B 09103 Lipid metabolism; C 00592 alpha-Linolenic acid metabolism [PATH:ko00592]	611.241	0.828432	0.529357	1.56498	0.117588	0.188696	611.241	0.217177	0.528757	0.41073	0.68127	0.756786	611.241	-0.613432	0.528225	-1.16131	0.245517	0.361307	242.26	974.61	382.6	552.21	299.94	241.29	732.67	497.48	415.75	1125.94	1006.19	970.67
Am_Rn_047600	F:GO:0004650; C:GO:0005576; P:GO:0005982; P:GO:0005985; C:GO:0016021; F:GO:0016829; P:GO:0071555	F:polygalacturonase activity; C:extracellular region; P:starch metabolic process; P:sucrose metabolic process; C:integral component of membrane; F:lyase activity; P:cell wall organization	.	.	.	277.986	0.104149	0.227476	0.457845	0.647064	0.748483	277.986	-0.515339	0.225314	-2.28721	0.0221835	0.0423489	277.986	-0.238676	0.226027	-1.05596	0.290986	0.413188	167.66	247.45	198.16	175.34	270.34	293.04	315.67	370.99	440.11	244.04	335.56	372.09
Am_Rn_056109	F:GO:0005506; C:GO:0005737; P:GO:0019310; F:GO:0050113	F:iron ion binding; C:cytoplasm; P:inositol catabolic process; F:inositol oxygenase activity	K00469	MIOX; inositol oxygenase [EC:1.13.99.1]	A 9100 Metabolism; B 09101 Carbohydrate metabolism; C 00053 Ascorbate and aldarate metabolism [PATH:ko00053]|A 9100 Metabolism; B 09101 Carbohydrate metabolism; C 00562 Inositol phosphate metabolism [PATH:ko00562]	476.802	7.84552	1.91862	4.08915	4.32953e-05	0.000159779	476.802	3.33452	1.89695	1.75783	0.0787763	0.128528	476.802	13.3283	2.23207	5.97126	2.35433e-09	2.74772e-08	35.34	203.2	4062.79	0	22.82	0	281.49	134.68	103.02	0	0	0
Am_Rn_004776	P:GO:0006541; F:GO:0016740; F:GO:0033969	P:glutamine metabolic process; F:transferase activity; F:gamma-glutamyl-gamma-aminobutyrate hydrolase activity	.	.	.	328.71	8.63539	3.02494	2.85473	0.00430735	0.0103703	328.71	7.24578	3.00471	2.41148	0.0158881	0.0315518	328.71	12.9206	3.2155	4.01822	5.86389e-05	0.000267565	0	446.29	2827.1	2.42	7.56	0	0	5.59	24.1	0	0	0
Am_Rn_000221	F:GO:0005524; C:GO:0005743; F:GO:0008270; P:GO:0009409; C:GO:0009535; C:GO:0010287; C:GO:0010319; P:GO:0015986; F:GO:0016887; C:GO:0031977; P:GO:0042742; F:GO:0043531; C:GO:0045261; F:GO:0046933	F:ATP binding; C:mitochondrial inner membrane; F:zinc ion binding; P:response to cold; C:chloroplast thylakoid membrane; C:plastoglobule; C:stromule; P:proton motive force-driven ATP synthesis; F:ATP hydrolysis activity; C:thylakoid lumen; P:defense response to bacterium; F:ADP binding; C:proton-transporting ATP synthase complex, catalytic core F(1); F:proton-transporting ATP synthase activity, r…	K02132	ATPeF1A, ATP5A1, ATP1; F-type H+-transporting ATPase subunit alpha	A 9100 Metabolism; B 09102 Energy metabolism; C 00190 Oxidative phosphorylation [PATH:ko00190]|A 9150 Organismal Systems; B 09159 Environmental adaptation; C 04714 Thermogenesis [PATH:ko04714]|A 9160 Human Diseases; B 09161 Cancer: overview; C 05208 Chemical carcinogenesis - reactive oxygen species [PATH:ko05208]|A 9160 Human Diseases; B 09164 Neurodegenerative disease; C 05010 Alzheimer disease …	371.131	1.04627	0.837427	1.24939	0.211524	0.308376	371.131	-0.611022	0.835826	-0.731039	0.464755	0.570386	371.131	-0.422484	0.835903	-0.505422	0.613262	0.729273	258.46	296.51	292.22	225.28	104.62	202.24	1085.32	233.65	206.7	1098.31	184.62	201.33
Am_Rn_000230	.	.	.	.	.	272.44	1.86992	0.939366	1.99062	NA	NA	272.44	3.93738	0.944716	4.16779	NA	NA	272.44	3.41396	0.942427	3.62252	NA	NA	1548.65	106.85	78.85	288.83	178.42	193.62	41.61	73.78	42.78	92.75	67.4	74.16
Am_Rn_000231	.	.	.	.	.	1504.71	-0.562744	0.846884	-0.664487	0.506378	0.621794	1504.71	-1.1335	0.846786	-1.3386	0.180702	0.262488	1504.71	-1.26088	0.846762	-1.48906	0.136472	0.22385	543.5	611.94	956.87	2152.59	907.38	886.89	92.32	3310.85	2964.51	1976.04	2908.45	1798.09
Am_Rn_000238	F:GO:0004672; F:GO:0005524; P:GO:0006468; C:GO:0016021	F:protein kinase activity; F:ATP binding; P:protein phosphorylation; C:integral component of membrane	.	.	.	291.884	6.3755	1.65219	3.85882	0.000113934	0.000386953	291.884	5.25148	1.64437	3.19362	0.001405	0.00366469	291.884	12.7082	2.01725	6.29979	2.98041e-10	4.06841e-09	689.07	278.78	1775.31	0	15.13	31.37	0	37.44	64.65	0	0	0
Am_Rn_007388	F:GO:0005524; C:GO:0009507; P:GO:0042026	F:ATP binding; C:chloroplast; P:protein refolding	K04077	groEL, HSPD1; chaperonin GroEL	A 9120 Genetic Information Processing; B 09123 Folding, sorting and degradation; C 03018 RNA degradation [PATH:ko03018]|A 9150 Organismal Systems; B 09149 Aging; C 04212 Longevity regulating pathway - worm [PATH:ko04212]|A 9160 Human Diseases; B 09171 Infectious disease: bacterial; C 05134 Legionellosis [PATH:ko05134]|A 9160 Human Diseases; B 09171 Infectious disease: bacterial; C 05152 Tuberculo…	66.9276	0	4.40736	0	1	1	66.9276	-20.2755	4.24894	-4.77189	1.8251e-06	8.80346e-06	66.9276	-22.7653	4.24736	-5.35986	8.32886e-08	7.22492e-07	0	0	0	0	0	0	0	78	60.09	0	736.3	0
Am_Rn_009824	F:GO:0003735; C:GO:0005840; P:GO:0006412; P:GO:0042254	F:structural constituent of ribosome; C:ribosome; P:translation; P:ribosome biogenesis	K02866	RP-L10e, RPL10; large subunit ribosomal protein L10e	A 9120 Genetic Information Processing; B 09122 Translation; C 03010 Ribosome [PATH:ko03010]|A 9160 Human Diseases; B 09172 Infectious disease: viral; C 05171 Coronavirus disease - COVID-19 [PATH:ko05171]	329.211	5.73223	3.14031	1.82537	0.0679449	0.118042	329.211	2.61205	3.13594	0.832942	0.404878	0.513187	329.211	12.6942	3.34933	3.79007	0.000150608	0.000618781	350.94	169.28	2220.72	0	63.93	0.01	197.49	0	394.31	0	0	0
Am_Rn_076207	C:GO:0005840	C:ribosome	.	.	.	278.336	-0.739189	0.207101	-3.56922	0.000358045	0.0010973	278.336	-0.519391	0.207894	-2.49835	0.0124773	0.0254935	278.336	-0.388331	0.208214	-1.86506	0.0621735	0.116118	146.85	173.31	190.84	399.76	301.63	402.33	334.28	300.59	297.07	301.65	277.76	303.7
Am_Rn_077640	F:GO:0046872; F:GO:0051213	F:metal ion binding; F:dioxygenase activity	.	.	.	211.574	12.2657	4.24717	2.88796	0.00387751	0.00942846	211.574	12.2568	4.24717	2.88587	0.00390338	0.00910529	211.574	12.2977	4.24717	2.89551	0.00378542	0.0105803	995.88	267.48	756.97	0	0	0	0	0	0	0	0	0
Am_Rn_053452	C:GO:0005634; P:GO:0006355; P:GO:0006782; F:GO:0008270; F:GO:0008483; C:GO:0009507; P:GO:0015995; F:GO:0030170; F:GO:0042286; F:GO:0043565	C:nucleus; P:regulation of DNA-templated transcription; P:protoporphyrinogen IX biosynthetic process; F:zinc ion binding; F:transaminase activity; C:chloroplast; P:chlorophyll biosynthetic process; F:pyridoxal phosphate binding; F:glutamate-1-semialdehyde 2,1-aminomutase activity; F:sequence-specific DNA binding	K01845	hemL; glutamate-1-semialdehyde 2,1-aminomutase [EC:5.4.3.8]	A 9100 Metabolism; B 09108 Metabolism of cofactors and vitamins; C 00860 Porphyrin metabolism [PATH:ko00860]	1054.07	-0.530612	0.222252	-2.38744	0.0169662	0.0351264	1054.07	-0.519773	0.222272	-2.33845	0.0193637	0.0375973	1054.07	-0.49727	0.222249	-2.23745	0.0252572	0.0544313	597.48	583.15	790.4	1119.92	1209.67	1381.19	883.88	1371.4	1451.6	1153.58	978.9	1577.45
Am_Rn_018837	P:GO:0006809; C:GO:0009325; F:GO:0009703; F:GO:0020037; F:GO:0030151; P:GO:0042128; F:GO:0043546; F:GO:0050464	P:nitric oxide biosynthetic process; C:nitrate reductase complex; F:nitrate reductase (NADH) activity; F:heme binding; F:molybdenum ion binding; P:nitrate assimilation; F:molybdopterin cofactor binding; F:nitrate reductase (NADPH) activity	K10534	NR; nitrate reductase (NAD(P)H) [EC:1.7.1.1 1.7.1.2 1.7.1.3]	A 9100 Metabolism; B 09102 Energy metabolism; C 00910 Nitrogen metabolism [PATH:ko00910]	200.713	5.18481	1.43776	3.60618	0.000310739	0.000963939	200.713	12.1421	1.85053	6.56142	5.32969e-11	5.71742e-10	200.713	12.1831	1.85053	6.58356	4.59326e-11	7.21861e-10	566.22	596.42	772.52	27.35	0	44.8	0	0	0	0	0	0
Am_Rn_045821	F:GO:0005524; F:GO:0016787; C:GO:0033180; P:GO:0046034; P:GO:1902600	F:ATP binding; F:hydrolase activity; C:proton-transporting V-type ATPase, V1 domain; P:ATP metabolic process; P:proton transmembrane transport	K02147	ATPeV1B, ATP6B; V-type H+-transporting ATPase subunit B	A 9100 Metabolism; B 09102 Energy metabolism; C 00190 Oxidative phosphorylation [PATH:ko00190]|A 9130 Environmental Information Processing; B 09132 Signal transduction; C 04150 mTOR signaling pathway [PATH:ko04150]|A 9140 Cellular Processes; B 09141 Transport and catabolism; C 04145 Phagosome [PATH:ko04145]|A 9150 Organismal Systems; B 09155 Excretory system; C 04966 Collecting duct acid secretio…	3805.46	0.0298802	0.234398	0.127477	0.898563	0.954403	3805.46	-0.519897	0.234266	-2.21925	0.0264695	0.0494767	3805.46	-0.159908	0.234336	-0.682388	0.494993	0.621976	1665.72	3651.44	3185.05	3183.38	3146.35	4337.32	4706.34	5057.5	5643.23	3476.45	4006.86	4879.76
Am_Rn_018346	P:GO:0006511; F:GO:0031625	P:ubiquitin-dependent protein catabolic process; F:ubiquitin protein ligase binding	K03347	CUL1, CDC53; cullin 1	A 9120 Genetic Information Processing; B 09123 Folding, sorting and degradation; C 04141 Protein processing in endoplasmic reticulum [PATH:ko04141]|A 9120 Genetic Information Processing; B 09123 Folding, sorting and degradation; C 04120 Ubiquitin mediated proteolysis [PATH:ko04120]|A 9130 Environmental Information Processing; B 09132 Signal transduction; C 04310 Wnt signaling pathway [PATH:ko0431…	177.472	11.7678	1.71468	6.86296	6.74487e-12	6.90534e-11	177.472	11.7589	1.71468	6.85778	6.99405e-12	8.63194e-11	177.472	2.43476	1.24831	1.95044	0.0511235	0.0985012	103.97	711.66	726.48	0	0	0	0	0	0	294	28.99	36.5
Am_Rn_000299	P:GO:0030433; F:GO:0031593; F:GO:0051787; C:GO:0071818	P:ubiquitin-dependent ERAD pathway; F:polyubiquitin modification-dependent protein binding; F:misfolded protein binding; C:BAT3 complex	.	.	.	636.8	0.33246	0.220049	1.51085	0.130827	0.206592	636.8	0.154608	0.219769	0.703501	0.481743	0.585112	636.8	0.266557	0.219873	1.21232	0.225389	0.337054	620.17	658.15	511.92	530.52	706.77	598.89	675.94	756.11	628.4	613.62	756.85	599.43
Am_Rn_058002	P:GO:0009617; P:GO:0009644	P:response to bacterium; P:response to high light intensity	.	.	.	1852.54	0.695113	0.221351	3.14032	0.00168762	0.00446012	1852.54	-0.521836	0.220647	-2.36503	0.0180288	0.0352681	1852.54	0.293339	0.221026	1.32717	0.184452	0.286255	1045.94	1926.8	1848.15	1346.49	1043.13	1421.25	2672.25	3227.14	2874.46	1851.25	1780.78	1487.69
Am_Rn_007632	P:GO:0000712; P:GO:0000819; F:GO:0003677; F:GO:0003918; F:GO:0005524; C:GO:0005634; P:GO:0006265; P:GO:0044774	P:resolution of meiotic recombination intermediates; P:sister chromatid segregation; F:DNA binding; F:DNA topoisomerase type II (double strand cut, ATP-hydrolyzing) activity; F:ATP binding; C:nucleus; P:DNA topological change; P:mitotic DNA integrity checkpoint signaling	K03164	TOP2; DNA topoisomerase II [EC:5.6.2.2]	A 9160 Human Diseases; B 09176 Drug resistance: antineoplastic; C 01524 Platinum drug resistance [PATH:ko01524]	111.502	-19.3189	2.86105	-6.75239	1.45434e-11	1.42624e-10	111.502	-22.5695	2.85759	-7.89808	2.83243e-15	5.55363e-14	111.502	-21.5305	2.858	-7.53342	4.94293e-14	1.25475e-12	0	0	0.48	0	38.82	59.96	78.82	269.75	604.41	0	0	463.19
Am_Rn_021982	F:GO:0005524; C:GO:0005886; P:GO:0006119; F:GO:0008553; C:GO:0016021; P:GO:0120029; P:GO:1902600	F:ATP binding; C:plasma membrane; P:oxidative phosphorylation; F:P-type proton-exporting transporter activity; C:integral component of membrane; P:proton export across plasma membrane; P:proton transmembrane transport	K01535	PMA1, PMA2; H+-transporting ATPase [EC:7.1.2.1]	A 9100 Metabolism; B 09102 Energy metabolism; C 00190 Oxidative phosphorylation [PATH:ko00190]	180.356	9.10983	1.82899	4.98081	6.33199e-07	3.18994e-06	180.356	11.0618	2.0578	5.37556	7.6343e-08	4.79347e-07	180.356	12.0646	2.0578	5.86286	4.54965e-09	5.03885e-08	17.74	128.19	1648.92	3	1	0	0	1	0	0	0	0
Am_Rn_000314	P:GO:0006807; P:GO:0043170; P:GO:0044238	P:nitrogen compound metabolic process; P:macromolecule metabolic process; P:primary metabolic process	.	.	.	227.707	-1.45937	0.688578	-2.1194	0.0340568	0.0649359	227.707	0.151123	0.691254	0.218621	0.826945	0.877113	227.707	-1.13192	0.688867	-1.64316	0.10035	0.173615	41.82	261.48	47.09	503.62	415.37	227.36	68.23	182.98	142.33	310.59	433.79	207.55
Am_Rn_085129	.	.	.	.	.	163.075	11.8901	4.24721	2.7995	0.00511818	0.0120897	163.075	11.8812	4.24721	2.79741	0.00515145	0.0116229	163.075	11.9221	4.24721	2.80705	0.00499972	0.013448	8	47	1566	0	0	0	0	0	0	0	0	0
Am_Rn_000319	F:GO:0008168; P:GO:0032259	F:methyltransferase activity; P:methylation	K22748	ATXR3, SDG2; [histone H3]-lysine4 N-trimethyltransferase ATXR3 [EC:2.1.1.354]	A 9100 Metabolism; B 09105 Amino acid metabolism; C 00310 Lysine degradation [PATH:ko00310]	471.039	-0.881474	0.522504	-1.68702	0.0915997	0.152694	471.039	0.266227	0.523631	0.508426	0.611155	0.696303	471.039	-0.512347	0.522741	-0.980115	0.327029	0.453148	317.64	336.61	259.55	649.84	799.65	730.59	74.57	451.4	509.58	469.84	764.14	492.71
Am_Rn_020366	F:GO:0003723	F:RNA binding	K21444	PCBP3_4; poly(rC)-binding protein 3/4	None	138.326	6.16595	3.65722	1.68597	0.0918019	0.15299	138.326	6.34106	3.65886	1.73307	0.0830831	0.1346	138.326	11.6475	3.83095	3.04036	0.00236293	0.00699824	654.7	13.94	600.88	0	0	27.37	0	22.44	0	0	0	0
Am_Rn_068267	.	.	.	.	.	133.464	11.6005	1.55578	7.45635	8.89535e-14	1.15928e-12	133.464	10.6298	1.55578	6.83243	8.34879e-12	1.01358e-10	133.464	11.6325	1.55578	7.47696	7.60592e-14	1.8866e-12	662	168	440	0	0	0	0	0	1	0	0	0
Am_Rn_065104	F:GO:0004298; C:GO:0005634; C:GO:0005737; C:GO:0005839; P:GO:0010499; P:GO:0043161	F:threonine-type endopeptidase activity; C:nucleus; C:cytoplasm; C:proteasome core complex; P:proteasomal ubiquitin-independent protein catabolic process; P:proteasome-mediated ubiquitin-dependent protein catabolic process	K02732	PSMB1; 20S proteasome subunit beta 6 [EC:3.4.25.1]	A 9120 Genetic Information Processing; B 09123 Folding, sorting and degradation; C 03050 Proteasome [PATH:ko03050]|A 9160 Human Diseases; B 09164 Neurodegenerative disease; C 05010 Alzheimer disease [PATH:ko05010]|A 9160 Human Diseases; B 09164 Neurodegenerative disease; C 05012 Parkinson disease [PATH:ko05012]|A 9160 Human Diseases; B 09164 Neurodegenerative disease; C 05014 Amyotrophic lateral …	810.905	-0.122821	0.12337	-0.995546	0.319471	0.432938	810.905	-0.525028	0.122505	-4.28576	1.82112e-05	7.2335e-05	810.905	-0.435254	0.122589	-3.55052	0.000384468	0.0014133	427.71	692	546.82	706.9	733.14	896.54	934.48	1016.65	1108.68	973.47	942	1039.14
Am_Rn_000339	F:GO:0008168; P:GO:0032259	F:methyltransferase activity; P:methylation	K22748	ATXR3, SDG2; [histone H3]-lysine4 N-trimethyltransferase ATXR3 [EC:2.1.1.354]	A 9100 Metabolism; B 09105 Amino acid metabolism; C 00310 Lysine degradation [PATH:ko00310]	449.468	-0.273088	0.544905	-0.501166	0.616254	0.721702	449.468	0.640548	0.545817	1.17356	0.240572	0.333134	449.468	0.238064	0.5453	0.436574	0.66242	0.771774	491.81	437.17	267.13	594.85	623.79	669.32	141.16	399.7	497.11	175.94	393.08	801.78
Am_Rn_000341	F:GO:0003676; P:GO:0015074	F:nucleic acid binding; P:DNA integration	.	.	.	509.059	0.336966	3.12879	0.107698	0.914235	0.966439	509.059	0.113992	3.12877	0.0364337	0.970937	0.986785	509.059	1.24442	3.12896	0.397711	0.690843	0.795814	462.1	0	1099.47	885.83	0	790.67	848.28	0	1041.19	535.55	0	365.43
Am_Rn_000342	C:GO:0016021; P:GO:0016567; C:GO:0031464	C:integral component of membrane; P:protein ubiquitination; C:Cul4A-RING E3 ubiquitin ligase complex	.	.	.	860.851	-0.00522834	0.676358	-0.00773014	0.993832	1	860.851	-0.162653	0.676304	-0.240503	0.80994	0.863519	860.851	0.121116	0.676394	0.179061	0.85789	0.924165	95.55	1068.28	1038.84	957.33	573.55	1258.41	532.67	1331.77	1273.07	1190.18	707.76	663.1
Am_Rn_048808	C:GO:0016021; P:GO:0045454	C:integral component of membrane; P:cell redox homeostasis	.	.	.	646.182	-0.220892	0.16557	-1.33413	0.182161	0.272362	646.182	-0.52508	0.165018	-3.18196	0.00146284	0.00379957	646.182	-0.0170396	0.165941	-0.102684	0.918213	0.967403	348.35	509.17	543.02	604.92	652.44	858.46	662.22	926.33	1018.17	577.9	598.69	687.05
Am_Rn_029479	.	.	K14485	TIR1; transport inhibitor response 1	A 9130 Environmental Information Processing; B 09132 Signal transduction; C 04075 Plant hormone signal transduction [PATH:ko04075]	135.26	4.64936	1.57962	2.94334	0.00324695	0.00804852	135.26	9.77906	1.88849	5.17825	2.23981e-07	1.28908e-06	135.26	11.5947	1.96249	5.90817	3.45935e-09	3.93394e-08	527	11.93	696.09	4.84	53.65	4.73	0	0	2.47	0	0	0
Am_Rn_035601	P:GO:0006351; C:GO:0070176	P:DNA-templated transcription; C:DRM complex	.	.	.	228.253	-0.840305	0.205784	-4.08342	4.43774e-05	0.000163535	228.253	-0.525347	0.207135	-2.53625	0.0112047	0.0231899	228.253	-0.381095	0.207601	-1.8357	0.0664015	0.12277	135.14	144.14	129.67	366.31	255.39	325.94	240.08	229.31	289.66	211.61	244.57	249.36
Am_Rn_000357	F:GO:0003677; F:GO:0005516; P:GO:0007165; F:GO:0016787; F:GO:0043531	F:DNA binding; F:calmodulin binding; P:signal transduction; F:hydrolase activity; F:ADP binding	.	.	.	669.536	-0.155273	0.368075	-0.421852	0.673133	0.772053	669.536	0.561534	0.368825	1.52249	0.127886	0.195356	669.536	-0.092419	0.368096	-0.251073	0.801758	0.884573	648.77	640.54	425.13	772.44	893.05	809.24	225.33	741.23	585.59	640.81	882.33	912.75
Am_Rn_000363	.	.	.	.	.	441.236	-0.174033	0.242267	-0.718353	0.47254	0.589376	441.236	-0.200515	0.242237	-0.827764	0.407804	0.516232	441.236	-0.351863	0.241845	-1.45491	0.145693	0.236267	263.64	453.65	258.32	491.32	434.43	477	337.95	584.22	520.67	450.56	546	632
Am_Rn_121124	F:GO:0005504; P:GO:0009627; C:GO:0016021	F:fatty acid binding; P:systemic acquired resistance; C:integral component of membrane	K12820	DHX15, PRP43; pre-mRNA-splicing factor ATP-dependent RNA helicase DHX15/PRP43 [EC:3.6.4.13]	A 9120 Genetic Information Processing; B 09121 Transcription; C 03040 Spliceosome [PATH:ko03040]	186.177	11.3847	1.73703	6.55411	5.59733e-11	5.09758e-10	186.177	11.3758	1.73703	6.549	5.79243e-11	6.17906e-10	186.177	0.687281	1.27747	0.538001	0.590576	0.709699	536.14	566.77	33.57	0	0	0	0	0	0	670.76	155.31	99.34
Am_Rn_000373	C:GO:0005635; P:GO:0016973; P:GO:0071763	C:nuclear envelope; P:poly(A)+ mRNA export from nucleus; P:nuclear membrane organization	.	.	.	619.872	0.310279	0.738337	0.42024	0.67431	0.773142	619.872	0.850966	0.738703	1.15197	0.249332	0.343378	619.872	-0.256939	0.738069	-0.348124	0.727747	0.826672	1082.42	184.42	368.44	671.67	338.45	822.56	608.91	434.11	125.9	801.26	1042.17	891.58
Am_Rn_000374	P:GO:0090304	P:nucleic acid metabolic process	.	.	.	263.575	3.10749	0.928616	3.34636	NA	NA	263.575	2.48086	0.927172	2.67573	NA	NA	263.575	2.65286	0.927415	2.86049	NA	NA	1395.71	163.41	109.22	30.94	150.37	89.36	81.37	193.51	148.79	71.32	113.27	198.08
Am_Rn_000376	.	.	.	.	.	397.449	0.20612	2.09324	0.0984695	0.92156	0.971623	397.449	0.558724	2.09335	0.266905	0.789543	0.846595	397.449	0.535422	2.09332	0.255776	0.798124	0.881741	374.7	885.14	2.76	565.49	727.75	0	195.26	869.89	1	366.86	727.57	1.08
Am_Rn_000377	F:GO:0003824; P:GO:0044237	F:catalytic activity; P:cellular metabolic process	.	.	.	948.145	-0.120889	0.577255	-0.209421	0.83412	0.905306	948.145	-0.143997	0.57725	-0.249453	0.80301	0.85811	948.145	0.127978	0.577344	0.221666	0.824574	0.899706	175.75	1089.12	1109.37	1048.8	803.95	1413.77	482.1	1297.22	1612.62	1136.01	822.52	808.52
Am_Rn_006636	.	.	.	.	.	121.379	11.3067	2.05915	5.49093	3.99822e-08	2.41596e-07	121.379	11.2978	2.05915	5.48662	4.09708e-08	2.69276e-07	121.379	3.11367	1.69268	1.83949	0.065843	0.12193	691.2	314.1	32.31	0	0	0	0	0	0	1.08	54.21	113.14
Am_Rn_121829	F:GO:0005524; C:GO:0005829; P:GO:0006457; P:GO:0009408; F:GO:0031072; F:GO:0046872; F:GO:0051082	F:ATP binding; C:cytosol; P:protein folding; P:response to heat; F:heat shock protein binding; F:metal ion binding; F:unfolded protein binding	K09503	DNAJA2; DnaJ homolog subfamily A member 2	A 9120 Genetic Information Processing; B 09123 Folding, sorting and degradation; C 04141 Protein processing in endoplasmic reticulum [PATH:ko04141]	115.177	0	4.40736	0	1	1	115.177	-23.4008	4.24724	-5.50964	3.59567e-08	2.3905e-07	115.177	-21.2318	4.24793	-4.99815	5.7882e-07	4.227e-06	0	0	0	0	0	0	996.25	55.78	0	270.5	0	0
Am_Rn_028055	.	.	.	.	.	309.92	-0.342155	0.189789	-1.80282	0.0714165	0.123245	309.92	-0.525622	0.18917	-2.77857	0.00545982	0.0122472	309.92	-0.426328	0.189351	-2.25152	0.0243526	0.0526677	181.91	228.9	200.04	316.65	301.05	385.51	379.26	365.39	377.71	292.36	427.66	363.19
Am_Rn_014623	F:GO:0005524; C:GO:0005634; C:GO:0005829; C:GO:0005886; P:GO:0006301; P:GO:0006511; P:GO:0010039; P:GO:0010053; C:GO:0031372; P:GO:0046686; F:GO:0061631; P:GO:0070534	F:ATP binding; C:nucleus; C:cytosol; C:plasma membrane; P:postreplication repair; P:ubiquitin-dependent protein catabolic process; P:response to iron ion; P:root epidermal cell differentiation; C:UBC13-MMS2 complex; P:response to cadmium ion; F:ubiquitin conjugating enzyme activity; P:protein K63-linked ubiquitination	K10580	UBE2N, BLU, UBC13; ubiquitin-conjugating enzyme E2 N [EC:2.3.2.23]	A 9120 Genetic Information Processing; B 09123 Folding, sorting and degradation; C 04120 Ubiquitin mediated proteolysis [PATH:ko04120]|A 9150 Organismal Systems; B 09151 Immune system; C 04624 Toll and Imd signaling pathway [PATH:ko04624]|A 9160 Human Diseases; B 09171 Infectious disease: bacterial; C 05131 Shigellosis [PATH:ko05131]	162.881	-22.0628	3.5525	-6.21051	5.2814e-10	4.20558e-09	162.881	-22.8939	3.55231	-6.4448	1.15753e-10	1.17717e-09	162.881	-20.8139	3.55309	-5.85796	4.68601e-09	5.17422e-08	0	0	0	426.16	73.46	138.13	657.32	413.14	0	276.08	0	0
Am_Rn_037365	F:GO:0003743; C:GO:0005840; P:GO:0006446; C:GO:0016021; P:GO:0031047	F:translation initiation factor activity; C:ribosome; P:regulation of translational initiation; C:integral component of membrane; P:gene silencing by RNA	K11593	ELF2C, AGO; eukaryotic translation initiation factor 2C	A 9150 Organismal Systems; B 09158 Development and regeneration; C 04361 Axon regeneration [PATH:ko04361]	57.1118	-19.6648	2.51696	-7.81292	5.58793e-15	8.31228e-14	57.1118	-21.4252	2.51449	-8.52068	1.58615e-17	4.18978e-16	57.1118	-20.5284	2.51533	-8.1613	3.31433e-16	1.15721e-14	0	0	0	47.83	39.51	28.32	345.29	0	0	140.25	57.35	20.25
Am_Rn_020790	.	.	.	.	.	1077.12	-0.00877074	0.182716	-0.048002	0.961715	1	1077.12	-0.526728	0.182182	-2.89122	0.0038375	0.00896739	1077.12	0.073477	0.182775	0.402008	0.687678	0.793229	722.92	841.9	868.78	812.65	1025.73	1367.17	1551.48	1401.41	1521.43	1095.97	978.99	979.93
Am_Rn_064501	P:GO:0009966; C:GO:0016021; P:GO:0016485	P:regulation of signal transduction; C:integral component of membrane; P:protein processing	.	.	.	29.9184	0	4.40736	0	1	1	29.9184	-21.1819	4.24801	-4.9863	6.1547e-07	3.23804e-06	29.9184	-20.216	4.24888	-4.75797	1.95549e-06	1.27326e-05	0	0	0	0	0	0	219.4	0	0	121.68	0	9.47
Am_Rn_071405	F:GO:0004356; F:GO:0005524; C:GO:0005737; P:GO:0006542; P:GO:0009252	F:glutamate-ammonia ligase activity; F:ATP binding; C:cytoplasm; P:glutamine biosynthetic process; P:peptidoglycan biosynthetic process	K01915	glnA, GLUL; glutamine synthetase [EC:6.3.1.2]	A 9100 Metabolism; B 09101 Carbohydrate metabolism; C 00630 Glyoxylate and dicarboxylate metabolism [PATH:ko00630]|A 9100 Metabolism; B 09102 Energy metabolism; C 00910 Nitrogen metabolism [PATH:ko00910]|A 9100 Metabolism; B 09105 Amino acid metabolism; C 00250 Alanine, aspartate and glutamate metabolism [PATH:ko00250]|A 9100 Metabolism; B 09105 Amino acid metabolism; C 00220 Arginine biosynthesi…	129.93	11.5623	4.24724	2.7223	0.00648293	0.0148937	129.93	11.5534	4.24724	2.72021	0.00652409	0.0143549	129.93	11.5943	4.24724	2.72985	0.00633629	0.0165222	0	67	1228	0	0	0	0	0	0	0	0	0
Am_Rn_006827	C:GO:0005887; F:GO:0022857; P:GO:0055085	C:integral component of plasma membrane; F:transmembrane transporter activity; P:transmembrane transport	.	.	.	132.106	11.5465	4.24725	2.71859	0.00655606	0.0150424	132.106	5.16052	4.08623	1.26291	0.206623	0.293408	132.106	11.5786	4.24725	2.72614	0.00640793	0.0166886	275.36	0	970.71	0	0	0	0	0	50.99	0	0	0
Am_Rn_103180	C:GO:0016021	C:integral component of membrane	.	.	.	238.867	12.439	1.96485	6.33076	2.43963e-10	2.03473e-09	238.867	9.67902	1.74197	5.55636	2.75465e-08	1.8705e-07	238.867	11.5093	1.96485	5.85758	4.69661e-09	5.1821e-08	218	128	2009	0	0	0	0	0	4	0	0	1
Am_Rn_054702	F:GO:0004601; F:GO:0005488; P:GO:0006804; P:GO:0006979; C:GO:0009505; C:GO:0009506; P:GO:0009987	F:peroxidase activity; F:binding; P:obsolete peroxidase reaction; P:response to oxidative stress; C:plant-type cell wall; C:plasmodesma; P:cellular process	K00430	E1.11.1.7; peroxidase [EC:1.11.1.7]	A 9100 Metabolism; B 09110 Biosynthesis of other secondary metabolites; C 00940 Phenylpropanoid biosynthesis [PATH:ko00940]	37.4231	-13.7737	3.98482	-3.45653	0.000547169	0.00160716	37.4231	-21.3009	3.83853	-5.54923	2.86928e-08	1.94352e-07	37.4231	-20.0908	3.83954	-5.23259	1.67149e-07	1.3633e-06	0	0	0	0	0	1.73	252.74	42.5	0	144.72	0	0
Am_Rn_000459	F:GO:0005524; F:GO:0008551; C:GO:0016021; F:GO:0016787; F:GO:0046872; P:GO:0070574	F:ATP binding; F:P-type cadmium transporter activity; C:integral component of membrane; F:hydrolase activity; F:metal ion binding; P:cadmium ion transmembrane transport	K01534	zntA; Zn2+/Cd2+-exporting ATPase [EC:7.2.2.12 7.2.2.21]	None	885.377	-2.33763	1.15759	-2.0194	0.0434456	0.0802641	885.377	-0.400156	1.15801	-0.345554	0.729678	0.79754	885.377	-1.0308	1.1578	-0.890315	0.373297	0.502775	0	598.96	390.05	1823.51	1821.34	2518.41	357.11	771.88	476.22	640.62	661.78	1239
Am_Rn_001981	.	.	.	.	.	121.923	11.4705	4.24726	2.70068	0.00691973	0.015796	121.923	11.4616	4.24726	2.69859	0.00696337	0.0151997	121.923	11.5026	4.24726	2.70823	0.00676422	0.0174783	475.32	54.9	634.81	0	0	0	0	0	0	0	0	0
Am_Rn_010128	P:GO:0009987	P:cellular process	K03164	TOP2; DNA topoisomerase II [EC:5.6.2.2]	A 9160 Human Diseases; B 09176 Drug resistance: antineoplastic; C 01524 Platinum drug resistance [PATH:ko01524]	95.0989	-22.8264	4.03384	-5.65871	1.52516e-08	9.84782e-08	95.0989	-18.4054	4.03893	-4.557	5.18892e-06	2.28935e-05	95.0989	-19.7712	4.0356	-4.89919	9.62304e-07	6.71024e-06	0	0	0	276.75	345.14	435.82	0	0	53.75	0	127.39	0
Am_Rn_024608	C:GO:0031305; P:GO:0033617	C:integral component of mitochondrial inner membrane; P:mitochondrial cytochrome c oxidase assembly	.	.	.	3523.22	16.323	1.4007	11.6534	2.20401e-31	1.43068e-29	3523.22	12.4289	0.910896	13.6447	2.17001e-42	6.30522e-40	3523.22	11.4938	0.83915	13.6969	1.05918e-42	4.5629e-40	22891.4	4794.03	5310.63	0	0	0	4	2	2	4	8	4
Am_Rn_097612	F:GO:0003735; P:GO:0006412; C:GO:0022625; P:GO:0042254	F:structural constituent of ribosome; P:translation; C:cytosolic large ribosomal subunit; P:ribosome biogenesis	K02900	RP-L27Ae, RPL27A; large subunit ribosomal protein L27Ae	A 9120 Genetic Information Processing; B 09122 Translation; C 03010 Ribosome [PATH:ko03010]|A 9160 Human Diseases; B 09172 Infectious disease: viral; C 05171 Coronavirus disease - COVID-19 [PATH:ko05171]	724.106	0.302571	0.209848	1.44186	0.149342	0.231166	724.106	-0.530615	0.208586	-2.54387	0.0109633	0.0227429	724.106	-0.191844	0.208954	-0.918115	0.358559	0.486752	536.72	632.07	467.93	470.84	571.69	685	1079.06	911.46	1017.55	685.03	798.84	994.03
Am_Rn_016465	F:GO:0000287; F:GO:0004743; C:GO:0005737; P:GO:0006094; P:GO:0006096; P:GO:0006144; P:GO:0015976; F:GO:0016301; F:GO:0030955	F:magnesium ion binding; F:pyruvate kinase activity; C:cytoplasm; P:gluconeogenesis; P:glycolytic process; P:purine nucleobase metabolic process; P:carbon utilization; F:kinase activity; F:potassium ion binding	K00873	PK, pyk; pyruvate kinase [EC:2.7.1.40]	A 9100 Metabolism; B 09101 Carbohydrate metabolism; C 00010 Glycolysis / Gluconeogenesis [PATH:ko00010]|A 9100 Metabolism; B 09101 Carbohydrate metabolism; C 00620 Pyruvate metabolism [PATH:ko00620]|A 9150 Organismal Systems; B 09152 Endocrine system; C 04922 Glucagon signaling pathway [PATH:ko04922]|A 9160 Human Diseases; B 09161 Cancer: overview; C 05203 Viral carcinogenesis [PATH:ko05203]|A 91…	294.375	12.5747	3.33288	3.77293	0.000161341	0.00053249	294.375	4.87271	3.12072	1.5614	0.118428	0.182731	294.375	3.48738	3.11887	1.11815	0.263502	0.382035	1097.95	496.71	936.71	0	0	0	0	0	126.89	0	25.9	289.92
Am_Rn_000476	F:GO:0004842; P:GO:0016567; F:GO:0016874	F:ubiquitin-protein transferase activity; P:protein ubiquitination; F:ligase activity	K10590	TRIP12; E3 ubiquitin-protein ligase TRIP12 [EC:2.3.2.26]	A 9120 Genetic Information Processing; B 09123 Folding, sorting and degradation; C 04120 Ubiquitin mediated proteolysis [PATH:ko04120]	1689.59	0.200178	0.226466	0.883923	0.376738	0.494127	1689.59	0.489891	0.226659	2.16135	0.0306681	0.0563511	1689.59	0.270288	0.226486	1.1934	0.232713	0.345887	1116.65	2253.27	1638.45	1964.63	1723.53	1829.45	1084.72	1875.01	1604.85	1629.43	1863.99	1905.81
Am_Rn_000479	.	.	.	.	.	343.096	0.105431	0.425127	0.247999	0.804135	0.882209	343.096	0.577776	0.425974	1.35636	0.174984	0.255374	343.096	0.0782134	0.425036	0.184016	0.854001	0.921304	491	286	159	357	382	418	166	315	369	355	458	390
Am_Rn_016886	.	.	.	.	.	118.227	11.4261	4.24726	2.69022	0.00714039	0.0162523	118.227	11.4172	4.24726	2.68813	0.00718529	0.0156304	118.227	11.4582	4.24726	2.69778	0.00698043	0.017953	4	29.62	1140.65	0	0	0	0	0	0	0	0	0
Am_Rn_012436	P:GO:0006000; P:GO:0006013; F:GO:0008928; P:GO:0009058	P:fructose metabolic process; P:mannose metabolic process; F:mannose-1-phosphate guanylyltransferase (GDP) activity; P:biosynthetic process	K00966	GMPP; mannose-1-phosphate guanylyltransferase [EC:2.7.7.13]	A 9100 Metabolism; B 09101 Carbohydrate metabolism; C 00051 Fructose and mannose metabolism [PATH:ko00051]|A 9100 Metabolism; B 09101 Carbohydrate metabolism; C 00520 Amino sugar and nucleotide sugar metabolism [PATH:ko00520]	108.267	5.63621	1.3986	4.02989	5.58023e-05	0.000201119	108.267	11.262	1.80763	6.23025	4.65699e-10	4.30416e-09	108.267	11.3029	1.80763	6.25291	4.02883e-10	5.38415e-09	425.09	184.81	415.66	0	9.49	19.62	0	0	0	0	0	0
Am_Rn_006249	P:GO:0030001; F:GO:0046872	P:metal ion transport; F:metal ion binding	.	.	.	105.725	8.73097	4.16022	2.09868	0.0358449	0.0679714	105.725	9.52828	4.21897	2.25844	0.0239184	0.0452777	105.725	11.2916	4.24729	2.65854	0.00784789	0.019846	785.12	0	177.74	3.37	0	0	0	0	1.57	0	0	0
Am_Rn_005386	F:GO:0003729; C:GO:0005681; C:GO:0005737; P:GO:0048026	F:mRNA binding; C:spliceosomal complex; C:cytoplasm; P:positive regulation of mRNA splicing, via spliceosome	.	.	.	107.537	11.2148	1.66795	6.72366	1.77211e-11	1.71964e-10	107.537	4.23573	1.19362	3.54863	0.000387239	0.00115396	107.537	11.2468	1.66795	6.74289	1.55263e-11	2.67389e-10	499.57	57.29	408.66	0	0	0	41	8.19	16.38	0	0	0
Am_Rn_044776	P:GO:0005975; F:GO:0008422; F:GO:0102483	P:carbohydrate metabolic process; F:beta-glucosidase activity; F:scopolin beta-glucosidase activity	K01188	E3.2.1.21; beta-glucosidase [EC:3.2.1.21]	A 9100 Metabolism; B 09101 Carbohydrate metabolism; C 00500 Starch and sucrose metabolism [PATH:ko00500]|A 9100 Metabolism; B 09106 Metabolism of other amino acids; C 00460 Cyanoamino acid metabolism [PATH:ko00460]|A 9100 Metabolism; B 09110 Biosynthesis of other secondary metabolites; C 00999 Biosynthesis of various plant secondary metabolites [PATH:ko00999]	260.862	9.24495	1.65211	5.59584	2.19561e-08	1.38058e-07	260.862	1.6485	1.49454	1.10301	0.270022	0.366855	260.862	11.2369	1.90227	5.90709	3.48207e-09	3.95824e-08	17.59	120.5	1829.66	4	0	0	155	464.05	197.83	0	0.93	0
Am_Rn_000526	F:GO:0003676; F:GO:0008270; P:GO:0015074	F:nucleic acid binding; F:zinc ion binding; P:DNA integration	.	.	.	312.968	0.624412	0.827329	0.754732	0.45041	0.569055	312.968	1.31816	0.828607	1.59081	0.111652	0.173663	312.968	-1.09723	0.8259	-1.32853	0.184004	0.28571	48.6	362.4	359.45	290.43	47.16	296.39	98.91	116.61	173.07	1119.17	197.14	785.06
Am_Rn_013630	P:GO:0006694; P:GO:0008299; F:GO:0016853; F:GO:0030604; F:GO:0046872; F:GO:0070402	P:steroid biosynthetic process; P:isoprenoid biosynthetic process; F:isomerase activity; F:1-deoxy-D-xylulose-5-phosphate reductoisomerase activity; F:metal ion binding; F:NADPH binding	K00099	dxr; 1-deoxy-D-xylulose-5-phosphate reductoisomerase [EC:1.1.1.267]	A 9100 Metabolism; B 09109 Metabolism of terpenoids and polyketides; C 00900 Terpenoid backbone biosynthesis [PATH:ko00900]	5366.26	-16.5574	4.24704	-3.89857	9.67607e-05	0.000333116	5366.26	0	4.40736	0	1	1	5366.26	0	4.40736	0	1	1	0	0	0	33420.6	11627.1	23638.2	0	0	0	0	0	0
Am_Rn_038196	F:GO:0004371; F:GO:0005524; P:GO:0006071; P:GO:0016310; F:GO:0034012; P:GO:0046486	F:glycerone kinase activity; F:ATP binding; P:glycerol metabolic process; P:phosphorylation; F:FAD-AMP lyase (cyclizing) activity; P:glycerolipid metabolic process	.	.	.	479.934	-0.0963922	0.19966	-0.482783	0.62925	0.73315	479.934	-0.533913	0.198741	-2.68648	0.00722101	0.0157003	479.934	-0.0128499	0.19978	-0.0643199	0.948716	0.98945	374.43	316.54	352.63	408.69	477.75	579.58	522.42	688.53	771.48	370.35	490.24	549.44
Am_Rn_000553	F:GO:0016740	F:transferase activity	K01528	DNM1_3; dynamin 1/3 [EC:3.6.5.5]	A 9130 Environmental Information Processing; B 09132 Signal transduction; C 04072 Phospholipase D signaling pathway [PATH:ko04072]|A 9140 Cellular Processes; B 09141 Transport and catabolism; C 04144 Endocytosis [PATH:ko04144]|A 9150 Organismal Systems; B 09155 Excretory system; C 04961 Endocrine and other factor-regulated calcium reabsorption [PATH:ko04961]|A 9150 Organismal Systems; B 09156 Ner…	727.565	0.586421	0.392296	1.49484	0.134956	0.212082	727.565	0.679647	0.392398	1.73204	0.0832672	0.13486	727.565	0.229442	0.391975	0.585347	0.558314	0.680109	1111.35	636.66	492.51	734.63	642.81	584.13	338.33	769.68	792.37	784.59	924.91	883.98
Am_Rn_000554	F:GO:0003676	F:nucleic acid binding	.	.	.	286.652	0.31988	0.754666	0.423869	0.671661	0.770684	286.652	-0.42749	0.753932	-0.567015	0.570704	0.661863	286.652	0.367555	0.754681	0.487033	0.626235	0.74079	332.31	341.52	48.99	85.43	256.08	440.45	246.84	556.99	482.34	170.77	421.94	146.96
Am_Rn_064127	P:GO:0005982; P:GO:0005985; C:GO:0016021; F:GO:0030599; P:GO:0042545; P:GO:0043086; F:GO:0045330; P:GO:0045490; F:GO:0046910	P:starch metabolic process; P:sucrose metabolic process; C:integral component of membrane; F:pectinesterase activity; P:cell wall modification; P:negative regulation of catalytic activity; F:aspartyl esterase activity; P:pectin catabolic process; F:pectinesterase inhibitor activity	.	.	.	49.4196	-15.9635	3.4672	-4.60414	4.14182e-06	1.82184e-05	49.4196	-21.9052	3.43246	-6.38177	1.75054e-10	1.72392e-09	49.4196	-19.504	3.43486	-5.67825	1.3608e-08	1.38511e-07	0	0	0	3.46	0	5.73	442.1	0	14.81	99.52	0	0
Am_Rn_104270	.	.	.	.	.	199.937	9.65562	1.17622	8.20902	2.23006e-16	3.90569e-15	199.937	4.59694	0.850433	5.40541	6.46599e-08	4.10814e-07	199.937	11.194	1.44573	7.74285	9.72134e-15	2.72514e-13	451.5	145.21	1271.17	1	2.35	0	19.78	36.88	46.64	0	1	0
Am_Rn_014821	.	.	.	.	.	108.361	10.0093	1.71484	5.83684	5.32014e-09	3.67722e-08	108.361	10.9622	1.71484	6.39252	1.63175e-10	1.61006e-09	108.361	1.96627	1.24912	1.57412	0.11546	0.195057	520.24	283.94	23.63	0	0	1	0	0	0	22.75	90.39	181.29
Am_Rn_000576	.	.	.	.	.	322.799	0.681892	0.661512	1.03081	0.302631	0.414815	322.799	0.98932	0.661953	1.49455	0.135033	0.204727	322.799	0.346621	0.661108	0.524303	0.600068	0.717836	392.78	538.87	177.38	165.34	478.69	232.69	96.76	454.47	180.63	229.03	600.31	312.68
Am_Rn_047595	C:GO:0016021; P:GO:0016192	C:integral component of membrane; P:vesicle-mediated transport	K08511	ATVAMP72; vesicle-associated membrane protein 72	None	96.2479	11.1294	4.24731	2.62033	0.00878447	0.0195525	96.2479	11.1205	4.24731	2.61824	0.00883852	0.0187911	96.2479	11.1614	4.24731	2.62788	0.00859185	0.021477	485.8	0	417.83	0	0	0	0	0	0	0	0	0
Am_Rn_019831	F:GO:0004022; C:GO:0005737; F:GO:0008270	F:alcohol dehydrogenase (NAD+) activity; C:cytoplasm; F:zinc ion binding	K18857	ADH1; alcohol dehydrogenase class-P [EC:1.1.1.1]	A 9100 Metabolism; B 09101 Carbohydrate metabolism; C 00010 Glycolysis / Gluconeogenesis [PATH:ko00010]|A 9100 Metabolism; B 09101 Carbohydrate metabolism; C 00620 Pyruvate metabolism [PATH:ko00620]|A 9100 Metabolism; B 09103 Lipid metabolism; C 00071 Fatty acid degradation [PATH:ko00071]|A 9100 Metabolism; B 09103 Lipid metabolism; C 00592 alpha-Linolenic acid metabolism [PATH:ko00592]|A 9100 Me…	96.5245	8.73333	1.11235	7.85123	4.11991e-15	6.24104e-14	96.5245	9.2973	1.25871	7.38637	1.50896e-13	2.34046e-12	96.5245	11.1607	1.38168	8.07763	6.60394e-16	2.2084e-14	298.35	255.29	393.94	0	0	3.15	0	0	1.55	0	0	0
Am_Rn_000599	F:GO:0003676	F:nucleic acid binding	.	.	.	218.723	-1.66938	1.29572	-1.28838	0.197613	0.291311	218.723	-1.30309	1.29591	-1.00554	0.314636	0.41726	218.723	1.65112	1.3012	1.26893	0.204468	0.311492	3.69	213.48	113.85	574.35	409.63	269.13	231.02	371.17	405.81	103.08	26.2	0.14
Am_Rn_057221	F:GO:0005351; C:GO:0005887; P:GO:0034219; P:GO:1902600	F:carbohydrate:proton symporter activity; C:integral component of plasma membrane; P:carbohydrate transmembrane transport; P:proton transmembrane transport	K03444	ERD6, ESL1; MFS transporter, SP family, ERD6-like sugar transporter	None	95.9939	11.1256	4.24731	2.61944	0.0088075	0.0195966	95.9939	11.1167	4.24731	2.61735	0.00886167	0.0188327	95.9939	11.1576	4.24731	2.62699	0.00861442	0.0215206	30.66	65.01	859.27	0	0	0	0	0	0	0	0	0
Am_Rn_000615	P:GO:0006259; F:GO:0016779	P:DNA metabolic process; F:nucleotidyltransferase activity	K01528	DNM1_3; dynamin 1/3 [EC:3.6.5.5]	A 9130 Environmental Information Processing; B 09132 Signal transduction; C 04072 Phospholipase D signaling pathway [PATH:ko04072]|A 9140 Cellular Processes; B 09141 Transport and catabolism; C 04144 Endocytosis [PATH:ko04144]|A 9150 Organismal Systems; B 09155 Excretory system; C 04961 Endocrine and other factor-regulated calcium reabsorption [PATH:ko04961]|A 9150 Organismal Systems; B 09156 Ner…	1520.64	0.0277991	0.320304	0.0867899	0.930839	0.979207	1520.64	-0.17122	0.320225	-0.534685	0.592867	0.681581	1520.64	0.539383	0.320555	1.68265	0.0924424	0.161894	662.33	2064.98	1373.02	1604.97	1634.91	1816.13	1318.69	2174.21	2384.45	1285.97	1269.13	1059.09
Am_Rn_072848	F:GO:0005199; C:GO:0005618; P:GO:0031505; P:GO:0042546	F:structural constituent of cell wall; C:cell wall; P:fungal-type cell wall organization; P:cell wall biogenesis	.	.	.	95.7689	11.1222	4.24731	2.61864	0.0088281	0.0196352	95.7689	11.1133	4.24731	2.61655	0.00888238	0.0188674	95.7689	11.1543	4.24731	2.62619	0.00863461	0.0215619	14	91	852	0	0	0	0	0	0	0	0	0
Am_Rn_000647	F:GO:0005249; C:GO:0008076; F:GO:0020037; P:GO:0034765; P:GO:0071805	F:voltage-gated potassium channel activity; C:voltage-gated potassium channel complex; F:heme binding; P:regulation of ion transmembrane transport; P:potassium ion transmembrane transport	K19027	ZFYVE26; zinc finger FYVE domain-containing protein 26	None	831.18	-0.0846565	0.298487	-0.283619	0.776702	0.860343	831.18	0.443594	0.299003	1.48358	0.137921	0.208515	831.18	0.170363	0.298673	0.570401	0.568406	0.689306	607.49	968.33	690.79	941.31	999.03	1143.97	338.54	880.15	975.56	752.93	896.49	990.22
Am_Rn_078654	C:GO:0005743; P:GO:0032981	C:mitochondrial inner membrane; P:mitochondrial respiratory chain complex I assembly	K09008	NDUFAF3; NADH dehydrogenase [ubiquinone] 1 alpha subcomplex assembly factor 3	A 9150 Organismal Systems; B 09159 Environmental adaptation; C 04714 Thermogenesis [PATH:ko04714]	274.603	-0.0850472	0.201059	-0.422996	0.672298	0.771328	274.603	-0.539533	0.199351	-2.70645	0.00680074	0.0148862	274.603	-0.169548	0.200546	-0.845435	0.397868	0.527668	198.37	217.28	171.73	250.22	250.2	309.89	403.13	336.53	345.26	290.33	287.12	296.66
Am_Rn_051921	C:GO:0016021	C:integral component of membrane	.	.	.	183.18	6.63811	2.21103	3.00227	0.00267972	0.00677177	183.18	6.32349	2.20716	2.86499	0.00417019	0.00965899	183.18	11.0956	2.48713	4.46122	8.14939e-06	4.56983e-05	1253.18	427.09	5.82	0	21.62	0	3.18	26.31	0	0	0.97	0
Am_Rn_015748	F:GO:0005052; C:GO:0005778; C:GO:0005781; C:GO:0005829; P:GO:0007165; P:GO:0009733; C:GO:0016021; P:GO:0016560	F:peroxisome matrix targeting signal-1 binding; C:peroxisomal membrane; C:obsolete peroxisome targeting signal receptor complex; C:cytosol; P:signal transduction; P:response to auxin; C:integral component of membrane; P:protein import into peroxisome matrix, docking	K13342	PEX5, PXR1; peroxin-5	A 9140 Cellular Processes; B 09141 Transport and catabolism; C 04146 Peroxisome [PATH:ko04146]	90.8205	6.75125	4.1045	1.64484	0.100002	0.16457	90.8205	11.0235	4.24733	2.59539	0.00944829	0.0199431	90.8205	11.0644	4.24733	2.60504	0.00918645	0.0227402	293.2	0	568.96	0	0	12.41	0	0	0	0	0	0
Am_Rn_045935	F:GO:0003746; C:GO:0005840; F:GO:0043022; P:GO:0045901	F:translation elongation factor activity; C:ribosome; F:ribosome binding; P:positive regulation of translational elongation	K03263	EIF5A; translation initiation factor 5A	None	89.3953	10.06	2.34176	4.29593	1.73965e-05	6.86521e-05	89.3953	11.0129	2.34176	4.70285	2.5656e-06	1.20551e-05	89.3953	11.0539	2.34176	4.72034	2.35454e-06	1.50106e-05	17	63	810	1	0	0	0	0	0	0	0	0
Am_Rn_064876	.	.	.	.	.	790.066	0.307607	0.237566	1.29483	0.195379	0.288645	790.066	-0.541228	0.236576	-2.28776	0.0221515	0.0423022	790.066	0.107235	0.237226	0.452035	0.651243	0.762521	460.54	774.96	657.73	594.89	574.66	804.39	1368.08	968.37	1103.79	774.5	714.21	811.77
Am_Rn_106833	.	.	.	.	.	106.999	9.06493	1.42908	6.3432	2.25042e-10	1.88517e-09	106.999	1.93427	1.01307	1.90932	0.0562214	0.0957176	106.999	10.9774	1.55128	7.07631	1.48042e-12	3.01581e-11	83	155	608	0	2	0	33	113	151	0	0	0
Am_Rn_053269	C:GO:0005789; C:GO:0005793; C:GO:0005794; P:GO:0006886; P:GO:0006888; P:GO:0007030; C:GO:0016021; F:GO:0016787; C:GO:0030134	C:endoplasmic reticulum membrane; C:endoplasmic reticulum-Golgi intermediate compartment; C:Golgi apparatus; P:intracellular protein transport; P:endoplasmic reticulum to Golgi vesicle-mediated transport; P:Golgi organization; C:integral component of membrane; F:hydrolase activity; C:COPII-coated ER to Golgi transport vesicle	.	.	.	576.136	0.474581	0.224868	2.11049	0.0348162	0.0661936	576.136	-0.541321	0.223106	-2.42629	0.015254	0.0304272	576.136	0.249459	0.224288	1.11223	0.266041	0.38505	477	462.63	477.43	408.23	428.75	493.41	1044.76	778.35	790.83	503.83	514.72	567
Am_Rn_023877	F:GO:0008324; C:GO:0016021; P:GO:0098655	F:cation transmembrane transporter activity; C:integral component of membrane; P:cation transmembrane transport	.	.	.	132.772	3.89295	1.17883	3.30239	0.000958641	0.00267183	132.772	0.966763	1.16822	0.827553	0.407924	0.516319	132.772	10.9671	1.65786	6.6152	3.71051e-11	5.9592e-10	278.33	103.92	432.87	0	35.93	39.25	132.44	133.29	299.37	0	0	0
Am_Rn_065532	F:GO:0003746; F:GO:0003924; F:GO:0005525; C:GO:0005840; P:GO:0006448	F:translation elongation factor activity; F:GTPase activity; F:GTP binding; C:ribosome; P:regulation of translational elongation	K03231	EEF1A; elongation factor 1-alpha	A 9120 Genetic Information Processing; B 09122 Translation; C 03013 Nucleocytoplasmic transport [PATH:ko03013]|A 9160 Human Diseases; B 09171 Infectious disease: bacterial; C 05134 Legionellosis [PATH:ko05134]|A 9160 Human Diseases; B 09174 Infectious disease: parasitic; C 05140 Leishmaniasis [PATH:ko05140]	84.1117	10.9349	4.24735	2.57453	0.0100376	0.0220393	84.1117	10.926	4.24735	2.57244	0.0100984	0.0211515	84.1117	10.967	4.24735	2.58208	0.00982058	0.0241143	166	159	507	0	0	0	0	0	0	0	0	0
Am_Rn_092617	.	.	.	.	.	161.871	10.9164	1.26576	8.62435	6.44597e-18	1.32253e-16	161.871	11.8693	1.26576	9.37718	6.77599e-21	2.64698e-19	161.871	10.9484	1.26576	8.64969	5.16412e-18	2.34903e-16	563.52	441.91	581.09	1	0	0	0	0	0	1	0	0
Am_Rn_000702	F:GO:0016772; P:GO:0044237	F:transferase activity, transferring phosphorus-containing groups; P:cellular metabolic process	.	.	.	888.46	-0.327184	0.329882	-0.991824	0.321283	0.434911	888.46	0.00338355	0.330124	0.0102493	0.991822	1	888.46	0.257285	0.330299	0.778946	0.436012	0.56553	918.53	679.32	526.2	1466.72	1060.59	922.39	935.97	1031.85	771.17	750.25	783.75	855.97
Am_Rn_057238	F:GO:0004029; P:GO:0006094; P:GO:0006096; P:GO:0006525; P:GO:0006547; P:GO:0006550; P:GO:0006552; P:GO:0006554; P:GO:0006560; P:GO:0006568; P:GO:0006574; P:GO:0006631; P:GO:0006699; P:GO:0019260; P:GO:0019482; P:GO:0019852; P:GO:0046251; P:GO:0046486	F:aldehyde dehydrogenase (NAD+) activity; P:gluconeogenesis; P:glycolytic process; P:arginine metabolic process; P:histidine metabolic process; P:isoleucine catabolic process; P:leucine catabolic process; P:lysine catabolic process; P:proline metabolic process; P:tryptophan metabolic process; P:valine catabolic process; P:fatty acid metabolic process; P:bile acid biosynthetic process; P:1,2-dichl…	K12355	REF1; coniferyl-aldehyde dehydrogenase [EC:1.2.1.68]	A 9100 Metabolism; B 09110 Biosynthesis of other secondary metabolites; C 00940 Phenylpropanoid biosynthesis [PATH:ko00940]	82.6986	5.94896	1.40778	4.22578	2.38111e-05	9.17933e-05	82.6986	10.6794	1.79662	5.94415	2.77903e-09	2.24836e-08	82.6986	2.73326	1.36204	2.00673	0.044778	0.0880295	397.37	204	79.89	9	5	0	0	0	0	46	89	2.85
Am_Rn_000709	C:GO:0016021	C:integral component of membrane	K19525	VPS13A_C; vacuolar protein sorting-associated protein 13A/C	None	903.268	0.271995	0.601415	0.452259	0.651082	0.752021	903.268	0.111656	0.601342	0.185678	0.852697	0.898213	903.268	-0.439538	0.601114	-0.731205	0.464654	0.593949	596.14	1220.34	417.02	659.09	1067.56	575.02	904.58	1128.67	517.05	1438.19	1994.09	442.05
Am_Rn_084243	C:GO:0016021	C:integral component of membrane	.	.	.	80.0796	7.20071	1.86726	3.8563	0.000115116	0.000390534	80.0796	10.8456	2.13866	5.0712	3.9532e-07	2.1626e-06	80.0796	10.8865	2.13866	5.09035	3.57404e-07	2.71801e-06	639.77	28.95	56.31	4.02	0	3.48	0	0	0	0	0	0
Am_Rn_024583	P:GO:0006855	P:xenobiotic transmembrane transport	K03327	TC.MATE, SLC47A, norM, mdtK, dinF; multidrug resistance protein, MATE family	None	80.5516	8.01657	1.92895	4.15594	3.23958e-05	0.000122171	80.5516	6.31534	1.83172	3.44776	0.000565259	0.00161778	80.5516	10.8818	2.13969	5.08571	3.66249e-07	2.77879e-06	36.65	577.85	222.39	2.19	0	2.5	0	0	13.54	0	0	0
Am_Rn_000724	C:GO:0016021	C:integral component of membrane	.	.	.	491.698	0.423481	0.272198	1.55578	0.11976	0.191547	491.698	0.227983	0.271822	0.838722	0.401625	0.509721	491.698	-0.347094	0.270846	-1.28152	0.200011	0.30588	389.95	482.47	393.1	352.72	369.15	506.89	263.34	558.72	601.88	743.28	820.82	550.63
Am_Rn_000732	P:GO:0006541; F:GO:0016740; F:GO:0033969	P:glutamine metabolic process; F:transferase activity; F:gamma-glutamyl-gamma-aminobutyrate hydrolase activity	.	.	.	551.526	0.44491	0.125829	3.53582	0.000406505	0.00123036	551.526	0.21292	0.125021	1.70307	0.0885553	0.142241	551.526	0.0459212	0.124346	0.369301	0.711903	0.812692	441.35	636.44	470	454.59	477.1	530.77	488.01	628.36	596.17	618.54	695.57	652.98
Am_Rn_007499	F:GO:0004575; P:GO:0005982; P:GO:0005985; C:GO:0016021; C:GO:0017177	F:sucrose alpha-glucosidase activity; P:starch metabolic process; P:sucrose metabolic process; C:integral component of membrane; C:glucosidase II complex	K01193	INV, sacA; beta-fructofuranosidase [EC:3.2.1.26]	A 9100 Metabolism; B 09101 Carbohydrate metabolism; C 00052 Galactose metabolism [PATH:ko00052]|A 9100 Metabolism; B 09101 Carbohydrate metabolism; C 00500 Starch and sucrose metabolism [PATH:ko00500]	91.713	-19.4355	2.19789	-8.8428	9.33455e-19	2.08636e-17	91.713	-22.7728	2.1936	-10.3814	3.01201e-25	1.93053e-23	91.713	-18.9075	2.19982	-8.59502	8.32468e-18	3.66161e-16	0	0	0	0	95.16	0	257.59	475.84	273.63	28.67	13.27	28.76
Am_Rn_073733	F:GO:0005471; C:GO:0005743; C:GO:0016021; P:GO:0140021; P:GO:1990544	F:ATP:ADP antiporter activity; C:mitochondrial inner membrane; C:integral component of membrane; P:mitochondrial ADP transmembrane transport; P:mitochondrial ATP transmembrane transport	K05863	SLC25A4S, ANT; solute carrier family 25 (mitochondrial adenine nucleotide translocator), member 4/5/6/31	A 9130 Environmental Information Processing; B 09132 Signal transduction; C 04020 Calcium signaling pathway [PATH:ko04020]|A 9130 Environmental Information Processing; B 09132 Signal transduction; C 04022 cGMP-PKG signaling pathway [PATH:ko04022]|A 9140 Cellular Processes; B 09143 Cell growth and death; C 04217 Necroptosis [PATH:ko04217]|A 9140 Cellular Processes; B 09143 Cell growth and death; C…	153.271	11.8003	2.22568	5.30189	1.14608e-07	6.45246e-07	153.271	11.7914	2.22568	5.2979	1.17142e-07	7.12497e-07	153.271	10.8706	2.22568	4.88417	1.03867e-06	7.17441e-06	22	156.72	1353.46	0	0	0	0	0	0	0	0	1
Am_Rn_031517	F:GO:0004672; F:GO:0005524; P:GO:0006468	F:protein kinase activity; F:ATP binding; P:protein phosphorylation	.	.	.	76.4545	10.7975	2.04913	5.26931	1.3694e-07	7.62254e-07	76.4545	10.7886	2.04913	5.26497	1.40212e-07	8.37988e-07	76.4545	10.8296	2.04913	5.28496	1.25733e-07	1.05281e-06	443.85	200.14	87.13	0	0	0	0	0	0	0	0	0
Am_Rn_049384	C:GO:0000502; F:GO:0005524; C:GO:0005737; F:GO:0016787; P:GO:0030163	C:proteasome complex; F:ATP binding; C:cytoplasm; F:hydrolase activity; P:protein catabolic process	K03065	PSMC3, RPT5; 26S proteasome regulatory subunit T5	A 9120 Genetic Information Processing; B 09123 Folding, sorting and degradation; C 03050 Proteasome [PATH:ko03050]|A 9160 Human Diseases; B 09172 Infectious disease: viral; C 05169 Epstein-Barr virus infection [PATH:ko05169]|A 9160 Human Diseases; B 09164 Neurodegenerative disease; C 05010 Alzheimer disease [PATH:ko05010]|A 9160 Human Diseases; B 09164 Neurodegenerative disease; C 05012 Parkinson…	1511.8	0.106316	0.164391	0.646729	0.517807	0.63232	1511.8	-0.542342	0.163823	-3.31054	0.000931164	0.0025356	1511.8	-0.181169	0.164071	-1.10421	0.269502	0.388964	883.57	1453.71	1024.28	1244.33	1293.49	1465.04	2102.92	2056.76	2017.45	1584.09	1750.33	1646.72
Am_Rn_017131	P:GO:0010088	P:phloem development	.	.	.	3322.35	-12.907	1.79542	-7.18884	6.53421e-13	7.62342e-12	3322.35	-12.8691	1.79543	-7.16769	7.62722e-13	1.07136e-11	3322.35	-15.4433	1.79534	-8.60192	7.83902e-18	3.45838e-16	0	0	0	1577.11	2847.64	911.93	1345.71	1823.57	2228.37	513.12	31364	244.14
Am_Rn_000745	F:GO:0004674; F:GO:0005524; C:GO:0005634; P:GO:0006468; P:GO:0009069; P:GO:0016242; C:GO:0031931; C:GO:0031932; P:GO:0038202; F:GO:0044877	F:protein serine/threonine kinase activity; F:ATP binding; C:nucleus; P:protein phosphorylation; P:serine family amino acid metabolic process; P:negative regulation of macroautophagy; C:TORC1 complex; C:TORC2 complex; P:TORC1 signaling; F:protein-containing complex binding	K07203	MTOR, FRAP, TOR; serine/threonine-protein kinase mTOR [EC:2.7.11.1]	A 9130 Environmental Information Processing; B 09132 Signal transduction; C 04012 ErbB signaling pathway [PATH:ko04012]|A 9130 Environmental Information Processing; B 09132 Signal transduction; C 04371 Apelin signaling pathway [PATH:ko04371]|A 9130 Environmental Information Processing; B 09132 Signal transduction; C 04630 JAK-STAT signaling pathway [PATH:ko04630]|A 9130 Environmental Information …	1803.12	0.30106	0.494511	0.608804	0.542654	0.655755	1803.12	1.05475	0.494746	2.1319	0.0330153	0.0600156	1803.12	0.516317	0.494555	1.044	0.296484	0.419474	1956.93	2034.55	1974.05	1975.41	2071.2	2242.78	321.15	1743.56	1837.42	1103.6	2091.5	2364.83
Am_Rn_088722	.	.	.	.	.	75.1424	10.7723	4.24738	2.53621	0.0112059	0.0243019	75.1424	10.7634	4.24738	2.53412	0.011273	0.023314	75.1424	10.8043	4.24738	2.54376	0.0109665	0.0265016	0	49.52	699.95	0	0	0	0	0	0	0	0	0
Am_Rn_006160	C:GO:0016021; F:GO:0022857; P:GO:0055085	C:integral component of membrane; F:transmembrane transporter activity; P:transmembrane transport	.	.	.	76.1434	6.13926	1.68279	3.64827	0.000264012	0.000832791	76.1434	10.7622	2.01663	5.33672	9.46452e-08	5.8535e-07	76.1434	10.8031	2.01663	5.35703	8.46026e-08	7.32372e-07	512.86	50.6	132.29	5.56	6.97	0	0	0	0	0	0	0
Am_Rn_000760	F:GO:0004026; P:GO:0006508; F:GO:0008233; C:GO:0016021; P:GO:0042967	F:alcohol O-acetyltransferase activity; P:proteolysis; F:peptidase activity; C:integral component of membrane; P:obsolete acyl-carrier-protein biosynthetic process	K07052	K07052; CAAX protease family protein	None	535.414	-0.623938	0.374026	-1.66817	0.0952826	0.157876	535.414	-0.147919	0.374522	-0.394954	0.692877	0.766655	535.414	-0.0520888	0.37458	-0.139059	0.889403	0.946943	428.87	336.62	354.56	1004.24	478.15	772.98	300.85	550.67	820.45	461.81	451.36	648.91
Am_Rn_054961	F:GO:0003867; C:GO:0005829; P:GO:0006522; P:GO:0006531; P:GO:0009450; P:GO:0019482; F:GO:0030170	F:4-aminobutyrate transaminase activity; C:cytosol; P:alanine metabolic process; P:aspartate metabolic process; P:gamma-aminobutyric acid catabolic process; P:beta-alanine metabolic process; F:pyridoxal phosphate binding	K13524	ABAT; 4-aminobutyrate aminotransferase / (S)-3-amino-2-methylpropionate transaminase [EC:2.6.1.19 2.6.1.22]	A 9100 Metabolism; B 09101 Carbohydrate metabolism; C 00640 Propanoate metabolism [PATH:ko00640]|A 9100 Metabolism; B 09101 Carbohydrate metabolism; C 00650 Butanoate metabolism [PATH:ko00650]|A 9100 Metabolism; B 09105 Amino acid metabolism; C 00250 Alanine, aspartate and glutamate metabolism [PATH:ko00250]|A 9100 Metabolism; B 09105 Amino acid metabolism; C 00280 Valine, leucine and isoleucine …	73.5455	10.7415	2.91773	3.68147	0.000231889	0.000738717	73.5455	10.7326	2.91773	3.67843	0.000234675	0.000735307	73.5455	10.7736	2.91773	3.69247	0.000222089	0.000871516	6	76	654	0	0	0	0	0	0	0	0	0
Am_Rn_001698	.	.	.	.	.	148.921	11.5784	1.99021	5.81768	5.96717e-09	4.1012e-08	148.921	10.6077	1.99021	5.32995	9.82406e-08	6.05867e-07	148.921	2.9105	1.607	1.81114	0.0701195	0.128557	825.97	391.7	36.35	0	0	0	1	0	0	1.09	65.1	168.07
Am_Rn_045461	C:GO:0005634; P:GO:0071171; P:GO:1902979	C:nucleus; P:site-specific DNA replication termination at RTS1 barrier; P:mitotic DNA replication termination	K25186	RTF2; replication termination factor 2	None	570.937	-0.498124	0.173884	-2.86469	0.00417415	0.0100767	570.937	-0.549188	0.173806	-3.15977	0.00157894	0.00406069	570.937	-0.166408	0.174542	-0.953398	0.340388	0.467906	350	446	343	590	682	815	516	799	854	464	609	614
Am_Rn_067304	F:GO:0003700; C:GO:0005667; P:GO:0006355; P:GO:0006355	F:DNA-binding transcription factor activity; C:transcription regulator complex; P:regulation of DNA-templated transcription; P:regulation of DNA-templated transcription	K09464	GCN4; general control protein GCN4	A 9140 Cellular Processes; B 09141 Transport and catabolism; C 04138 Autophagy - yeast [PATH:ko04138]	72.8032	10.7269	2.87919	3.72567	0.000194797	0.000631366	72.8032	10.718	2.87919	3.72258	0.000197194	0.000627013	72.8032	10.759	2.87919	3.73681	0.000186369	0.00074563	9	62	656	0	0	0	0	0	0	0	0	0
Am_Rn_000790	P:GO:0006259; F:GO:0016740; F:GO:0043167; F:GO:0097159; F:GO:1901363	P:DNA metabolic process; F:transferase activity; F:ion binding; F:organic cyclic compound binding; F:heterocyclic compound binding	.	.	.	222.408	-0.230558	0.922058	-0.250047	0.802551	0.88101	222.408	1.11483	0.923739	1.20686	0.227484	0.318101	222.408	0.855355	0.923209	0.926501	0.354186	0.48229	18.86	117.08	565.27	368.7	414.41	249.58	100.69	178.5	137.12	201.26	246.74	53.44
Am_Rn_000793	P:GO:0000027; F:GO:0005524; C:GO:0005634; P:GO:0006364; F:GO:0016887	P:ribosomal large subunit assembly; F:ATP binding; C:nucleus; P:rRNA processing; F:ATP hydrolysis activity	K14572	MDN1, REA1; midasin	A 9120 Genetic Information Processing; B 09122 Translation; C 03008 Ribosome biogenesis in eukaryotes [PATH:ko03008]	217.555	0.735076	0.604951	1.2151	0.224329	0.323949	217.555	1.13296	0.606029	1.86949	0.0615549	0.103635	217.555	-0.183446	0.603361	-0.30404	0.761098	0.852832	378.02	223.05	57.44	160.01	112.66	264.6	114.03	109.56	177.06	348.82	249.16	422.47
Am_Rn_000794	F:GO:0003676; F:GO:0016787	F:nucleic acid binding; F:hydrolase activity	.	.	.	381.054	-2.54904	1.60998	-1.58327	0.11336	0.182931	381.054	-1.13691	1.61039	-0.705982	0.480199	0.584922	381.054	-0.72651	1.61058	-0.451087	0.651927	0.763016	0	0	353.16	1025.22	476.43	1214.06	286.18	353.84	365.48	261.15	137.87	380.22
Am_Rn_014535	.	.	.	.	.	73.7828	4.87416	2.34911	2.07489	0.0379967	0.0715095	73.7828	10.5163	2.61354	4.02378	5.72725e-05	0.000204605	73.7828	2.92599	2.33711	1.25197	0.210581	0.318897	131.57	73.45	415.52	0	0	31.45	0	0	0	95.27	0	12.93
Am_Rn_046995	F:GO:0000287; F:GO:0016831; F:GO:0030976	F:magnesium ion binding; F:carboxy-lyase activity; F:thiamine pyrophosphate binding	K01568	PDC, pdc; pyruvate decarboxylase [EC:4.1.1.1]	A 9100 Metabolism; B 09101 Carbohydrate metabolism; C 00010 Glycolysis / Gluconeogenesis [PATH:ko00010]	71.2827	10.6964	2.98593	3.58227	0.000340616	0.00104809	71.2827	10.6875	2.98593	3.5793	0.000344517	0.00103893	71.2827	10.7285	2.98593	3.59302	0.000326872	0.0012251	6	49	656	0	0	0	0	0	0	0	0	0
Am_Rn_018875	P:GO:0006633; F:GO:0016702; P:GO:0031408; F:GO:0046872	P:fatty acid biosynthetic process; F:oxidoreductase activity, acting on single donors with incorporation of molecular oxygen, incorporation of two atoms of oxygen; P:oxylipin biosynthetic process; F:metal ion binding	K15718	LOX1_5; linoleate 9S-lipoxygenase [EC:1.13.11.58]	A 9100 Metabolism; B 09103 Lipid metabolism; C 00591 Linoleic acid metabolism [PATH:ko00591]	3199.48	-11.8471	2.30184	-5.14678	2.65002e-07	1.41791e-06	3199.48	-14.4564	2.3017	-6.28073	3.36978e-10	3.17506e-09	3199.48	-14.9359	2.30169	-6.48907	8.63654e-11	1.29477e-09	0	0	0	0.04	1906.97	703.78	2573.21	5884.17	8151.92	794.56	15815.5	6262.56
Am_Rn_065654	.	.	.	.	.	283.374	-0.439714	0.247385	-1.77745	0.0754945	0.129215	283.374	-0.552001	0.247114	-2.23379	0.0254967	0.0478842	283.374	0.154682	0.249286	0.620502	0.534927	0.659213	172.39	232.66	193.66	308.55	357.02	381.64	435.66	329.36	338.81	280.3	206.52	220.04
Am_Rn_072777	.	.	.	.	.	70.9924	9.71908	1.71634	5.66269	1.49016e-08	9.65248e-08	70.9924	7.44871	1.401	5.31671	1.05661e-07	6.47569e-07	70.9924	10.713	1.71634	6.24176	4.32682e-10	5.75091e-09	31.53	391.78	309.18	0	1.46	0	2.88	0	1.89	0	0	0
Am_Rn_094077	.	.	.	.	.	69.6841	10.6637	3.00091	3.5535	0.000380145	0.00115932	69.6841	10.6548	3.00091	3.55054	0.000384447	0.00114643	69.6841	10.6958	3.00091	3.56419	0.000364988	0.00134795	6.98	38.48	648.93	0	0	0	0	0	0	0	0	0
Am_Rn_000838	F:GO:0004722; P:GO:0006470; C:GO:0008287	F:protein serine/threonine phosphatase activity; P:protein dephosphorylation; C:protein serine/threonine phosphatase complex	.	.	.	248.799	-0.57607	0.352136	-1.63593	0.101855	0.167072	248.799	0.0770356	0.353798	0.217739	0.827633	0.877628	248.799	-0.181886	0.352937	-0.515349	0.606309	0.723235	229.27	154.22	147.81	299.53	383.75	356.98	116.9	294.71	265.39	221.84	311.57	277.01
Am_Rn_039322	F:GO:0005524; P:GO:0006457; F:GO:0051082	F:ATP binding; P:protein folding; F:unfolded protein binding	K04079	HSP90A, htpG; molecular chaperone HtpG	A 9120 Genetic Information Processing; B 09123 Folding, sorting and degradation; C 04141 Protein processing in endoplasmic reticulum [PATH:ko04141]|A 9130 Environmental Information Processing; B 09132 Signal transduction; C 04151 PI3K-Akt signaling pathway [PATH:ko04151]|A 9140 Cellular Processes; B 09143 Cell growth and death; C 04217 Necroptosis [PATH:ko04217]|A 9150 Organismal Systems; B 09151…	68.75	10.6444	2.07571	5.12806	2.92738e-07	1.55397e-06	68.75	10.6355	2.07571	5.12378	2.99467e-07	1.67303e-06	68.75	10.6765	2.07571	5.14352	2.69645e-07	2.10918e-06	76	180	435	0	0	0	0	0	0	0	0	0
Am_Rn_000853	F:GO:0003989; F:GO:0005524; P:GO:0006090; P:GO:0006633; C:GO:0009317; F:GO:0046872	F:acetyl-CoA carboxylase activity; F:ATP binding; P:pyruvate metabolic process; P:fatty acid biosynthetic process; C:acetyl-CoA carboxylase complex; F:metal ion binding	K11262	ACACA; acetyl-CoA carboxylase / biotin carboxylase 1 [EC:6.4.1.2 6.3.4.14 2.1.3.15]	A 9100 Metabolism; B 09101 Carbohydrate metabolism; C 00620 Pyruvate metabolism [PATH:ko00620]|A 9100 Metabolism; B 09101 Carbohydrate metabolism; C 00640 Propanoate metabolism [PATH:ko00640]|A 9100 Metabolism; B 09103 Lipid metabolism; C 00061 Fatty acid biosynthesis [PATH:ko00061]|A 9100 Metabolism; B 09110 Biosynthesis of other secondary metabolites; C 00254 Aflatoxin biosynthesis [PATH:ko0025…	2632.4	0.0377138	0.573511	0.0657595	0.947569	0.992052	2632.4	0.980673	0.573674	1.70946	0.0873659	0.140649	2632.4	0.605531	0.573589	1.05569	0.291111	0.413329	2528.54	3469.29	2387.44	3531.09	3091.53	3904.65	324.95	2286.76	3166.56	1549.78	2405.92	3330.73
Am_Rn_047345	F:GO:0004843; C:GO:0005768; C:GO:0016020; P:GO:0070536	F:cysteine-type deubiquitinase activity; C:endosome; C:membrane; P:protein K63-linked deubiquitination	K11866	STAMBP, AMSH; STAM-binding protein [EC:3.4.19.12]	A 9140 Cellular Processes; B 09141 Transport and catabolism; C 04144 Endocytosis [PATH:ko04144]	266.442	-0.569464	0.205562	-2.77028	0.00560084	0.013099	266.442	-0.553414	0.20566	-2.69091	0.00712568	0.0155107	266.442	-0.208985	0.206847	-1.01034	0.312334	0.436668	133.24	237.77	154.24	323.16	290.51	385.95	313.16	300.14	365.17	278.65	275.25	237.09
Am_Rn_046748	.	.	.	.	.	133.754	11.6008	1.47012	7.89108	2.99583e-15	4.62783e-14	133.754	9.12106	1.20539	7.56687	3.82322e-14	6.47295e-13	133.754	10.6711	1.47012	7.25867	3.90921e-13	8.70848e-12	733.83	348.94	197.04	0	0	0	2	0	1	0	0	1
Am_Rn_067906	F:GO:0003978; C:GO:0005829; P:GO:0009117; P:GO:0033358; P:GO:0033499; P:GO:0045227; F:GO:0050373; P:GO:0071555	F:UDP-glucose 4-epimerase activity; C:cytosol; P:nucleotide metabolic process; P:UDP-L-arabinose biosynthetic process; P:galactose catabolic process via UDP-galactose; P:capsule polysaccharide biosynthetic process; F:UDP-arabinose 4-epimerase activity; P:cell wall organization	K01784	galE, GALE; UDP-glucose 4-epimerase [EC:5.1.3.2]	A 9100 Metabolism; B 09101 Carbohydrate metabolism; C 00052 Galactose metabolism [PATH:ko00052]|A 9100 Metabolism; B 09101 Carbohydrate metabolism; C 00520 Amino sugar and nucleotide sugar metabolism [PATH:ko00520]|A 9100 Metabolism; B 09107 Glycan biosynthesis and metabolism; C 00541 O-Antigen nucleotide sugar biosynthesis [PATH:ko00541]	68.4044	10.637	2.9601	3.59345	0.000326328	0.00100758	68.4044	10.6281	2.9601	3.59045	0.00033011	0.000998742	68.4044	10.669	2.9601	3.60429	0.000313013	0.00117783	76.29	5.11	589.8	0	0	0	0	0	0	0	0	0
Am_Rn_089971	F:GO:0005199; C:GO:0005618; P:GO:0031505; P:GO:0042546	F:structural constituent of cell wall; C:cell wall; P:fungal-type cell wall organization; P:cell wall biogenesis	.	.	.	68.3978	10.6368	2.9741	3.57649	0.000348243	0.00107016	68.3978	10.628	2.9741	3.5735	0.000352243	0.00106013	68.3978	10.6689	2.9741	3.58727	0.000334157	0.00124873	7	46	629	0	0	0	0	0	0	0	0	0
Am_Rn_000882	P:GO:0006493; F:GO:0016757	P:protein O-linked glycosylation; F:glycosyltransferase activity	K09667	OGT; protein O-GlcNAc transferase [EC:2.4.1.255]	A 9100 Metabolism; B 09107 Glycan biosynthesis and metabolism; C 00514 Other types of O-glycan biosynthesis [PATH:ko00514]|A 9160 Human Diseases; B 09167 Endocrine and metabolic disease; C 04931 Insulin resistance [PATH:ko04931]	427.764	-0.785617	0.625713	-1.25555	0.209278	0.305583	427.764	-0.897124	0.625635	-1.43394	0.151589	0.225965	427.764	-1.09766	0.625459	-1.75497	0.0792651	0.142602	83.28	307.33	261.24	278.13	559.01	588.02	121.23	601.73	881.2	398.67	685.08	710.01
Am_Rn_022700	F:GO:0005524; C:GO:0016021; F:GO:0016887; F:GO:0042626; P:GO:0055085	F:ATP binding; C:integral component of membrane; F:ATP hydrolysis activity; F:ATPase-coupled transmembrane transporter activity; P:transmembrane transport	.	.	.	549.153	-0.902565	0.22854	-3.94927	7.83896e-05	0.000274076	549.153	-0.555775	0.229038	-2.42656	0.0152429	0.030411	549.153	0.385067	0.230969	1.66718	0.0954783	0.166366	397.84	300.96	356.06	873.78	768.44	945.79	544.35	701.57	793.83	394.64	268.7	419.64
Am_Rn_000889	.	.	.	.	.	651.434	0.806948	0.39961	2.01934	0.0434522	0.0802715	651.434	0.473349	0.399241	1.18562	0.235772	0.327618	651.434	-0.124943	0.398707	-0.31337	0.754	0.847342	387.74	933.23	636.84	349.55	557.23	510.78	261.13	756.47	823.84	741.49	883.49	1145.95
Am_Rn_000894	F:GO:0003676; F:GO:0004523; P:GO:0006522; P:GO:0006531; F:GO:0008445; P:GO:0015074; C:GO:0016021; P:GO:0051252; P:GO:0090502	F:nucleic acid binding; F:RNA-DNA hybrid ribonuclease activity; P:alanine metabolic process; P:aspartate metabolic process; F:D-aspartate oxidase activity; P:DNA integration; C:integral component of membrane; P:regulation of RNA metabolic process; P:RNA phosphodiester bond hydrolysis, endonucleolytic	.	.	.	667.665	0.444736	1.39657	0.318448	0.750145	0.838659	667.665	2.42832	1.39734	1.73781	0.0822437	0.133396	667.665	1.95402	1.39703	1.3987	0.161904	0.257146	807.8	310.66	1866.32	1154.21	497.22	1278.13	0	228.24	564.11	21.46	538.05	488.33
Am_Rn_000896	F:GO:0003712; C:GO:0005667; P:GO:0006355; P:GO:0006357; C:GO:0016021; C:GO:0016592	F:transcription coregulator activity; C:transcription regulator complex; P:regulation of DNA-templated transcription; P:regulation of transcription by RNA polymerase II; C:integral component of membrane; C:mediator complex	.	.	.	491.116	-0.0888004	0.177106	-0.501398	0.616091	0.721577	491.116	0.340561	0.178281	1.91025	0.0561015	0.0955561	491.116	0.141074	0.177581	0.794422	0.42695	0.55631	381.15	429	486.87	534.29	591.71	664.83	326.76	456.39	554.54	426.33	530.4	604.5
Am_Rn_000900	P:GO:0006493; F:GO:0016757	P:protein O-linked glycosylation; F:glycosyltransferase activity	K09667	OGT; protein O-GlcNAc transferase [EC:2.4.1.255]	A 9100 Metabolism; B 09107 Glycan biosynthesis and metabolism; C 00514 Other types of O-glycan biosynthesis [PATH:ko00514]|A 9160 Human Diseases; B 09167 Endocrine and metabolic disease; C 04931 Insulin resistance [PATH:ko04931]	1819.28	-0.00132325	0.149695	-0.00883968	0.992947	1	1819.28	-0.117331	0.149612	-0.784237	0.432901	0.540179	1819.28	0.115249	0.149763	0.769539	0.441574	0.570799	1354.75	1785.97	1387.96	1950.34	1574.06	2356.14	1626.8	2416.11	2312.28	1975.71	1759.92	1763.29
Am_Rn_005567	.	.	.	.	.	177.379	-0.594275	0.385201	-1.54277	0.122887	0.195667	177.379	10.3219	1.23855	8.33386	7.82462e-17	1.9052e-15	177.379	0.518735	0.387993	1.33697	0.181233	0.282267	130.53	247.46	179.53	407.26	201.72	477.83	0	0	0	184.68	131.31	191.8
Am_Rn_018085	P:GO:0006810; C:GO:0016020; F:GO:1904680	P:transport; C:membrane; F:peptide transmembrane transporter activity	.	.	.	188.24	0.0974042	0.720401	0.135208	0.892447	0.950666	188.24	0.084761	0.7204	0.117658	0.906338	0.939721	188.24	10.605	1.37982	7.68578	1.52073e-14	4.14402e-13	52.4	144.01	460.94	235.68	232.81	323.57	160.28	313.24	335.42	0	0	0
Am_Rn_000918	P:GO:0006493; F:GO:0016757	P:protein O-linked glycosylation; F:glycosyltransferase activity	K09667	OGT; protein O-GlcNAc transferase [EC:2.4.1.255]	A 9100 Metabolism; B 09107 Glycan biosynthesis and metabolism; C 00514 Other types of O-glycan biosynthesis [PATH:ko00514]|A 9160 Human Diseases; B 09167 Endocrine and metabolic disease; C 04931 Insulin resistance [PATH:ko04931]	248.026	1.33198	1.87781	0.709324	0.478123	0.594783	248.026	0.437407	1.87714	0.233018	0.815748	0.868164	248.026	-0.272717	1.87681	-0.145308	0.884467	0.943381	210.82	3.07	500.47	0.09	359.8	0	145.63	227.47	347	236.39	357.74	592.79
Am_Rn_000921	F:GO:0003676; C:GO:0005634; P:GO:0015074	F:nucleic acid binding; C:nucleus; P:DNA integration	.	.	.	412.592	-0.606746	1.49447	-0.405993	0.684748	0.782023	412.592	1.45664	1.49543	0.974057	0.330028	0.434095	412.592	0.833654	1.49496	0.557641	0.57709	0.697383	712.66	417.36	21.57	1508	686.5	12.54	146.53	393.09	8.9	484.29	365.71	18.12
Am_Rn_022683	.	.	K06689	UBE2D, UBC4, UBC5; ubiquitin-conjugating enzyme E2 D [EC:2.3.2.23]	A 9120 Genetic Information Processing; B 09123 Folding, sorting and degradation; C 04141 Protein processing in endoplasmic reticulum [PATH:ko04141]|A 9120 Genetic Information Processing; B 09123 Folding, sorting and degradation; C 04120 Ubiquitin mediated proteolysis [PATH:ko04120]|A 9130 Environmental Information Processing; B 09132 Signal transduction; C 04013 MAPK signaling pathway - fly [PATH…	66.1279	10.5116	2.02932	5.17986	2.22049e-07	1.20328e-06	66.1279	4.19871	1.66691	2.51886	0.0117734	0.024216	66.1279	10.5437	2.02932	5.19567	2.03986e-07	1.63311e-06	97.84	172.37	357.91	0	0	0	21.68	18.92	0	0	0	0
Am_Rn_000927	F:GO:0003774; F:GO:0003779; F:GO:0003917; F:GO:0005524; P:GO:0006265; P:GO:0007015; C:GO:0009506; P:GO:0010091; P:GO:0010154; C:GO:0016459; F:GO:0016787; C:GO:0030133; C:GO:0035619; P:GO:0048467; P:GO:0048768; P:GO:0051301; P:GO:0051645; P:GO:0051646; P:GO:0060151; P:GO:0090436	F:cytoskeletal motor activity; F:actin binding; F:DNA topoisomerase type I (single strand cut, ATP-independent) activity; F:ATP binding; P:DNA topological change; P:actin filament organization; C:plasmodesma; P:trichome branching; P:fruit development; C:myosin complex; F:hydrolase activity; C:transport vesicle; C:root hair tip; P:gynoecium development; P:root hair cell tip growth; P:cell division…	K10357	MYO5; myosin V	A 9160 Human Diseases; B 09171 Infectious disease: bacterial; C 05130 Pathogenic Escherichia coli infection [PATH:ko05130]	450.008	-0.0583316	0.67132	-0.0868909	0.930758	0.979156	450.008	0.904368	0.672083	1.34562	0.178425	0.259741	450.008	1.04231	0.672183	1.55064	0.120988	0.202655	450.42	492.31	516.24	578.98	626.37	775.11	32.96	409.19	633.95	271.93	284.94	384.38
Am_Rn_000928	P:GO:0000388; F:GO:0003676; F:GO:0003724; F:GO:0005524; C:GO:0005682; F:GO:0016787; C:GO:0046540; C:GO:0071013; C:GO:0071014	P:spliceosome conformational change to release U4 (or U4atac) and U1 (or U11); F:nucleic acid binding; F:RNA helicase activity; F:ATP binding; C:U5 snRNP; F:hydrolase activity; C:U4/U6 x U5 tri-snRNP complex; C:catalytic step 2 spliceosome; C:post-mRNA release spliceosomal complex	K12854	SNRNP200, BRR2; pre-mRNA-splicing helicase BRR2 [EC:3.6.4.13]	A 9120 Genetic Information Processing; B 09121 Transcription; C 03040 Spliceosome [PATH:ko03040]	571.576	0.791562	0.662266	1.19523	0.231996	0.333238	571.576	1.03455	0.662452	1.5617	0.118358	0.18264	571.576	0.973428	0.662368	1.46962	0.141665	0.230899	1192.09	552.57	385.18	563.58	574.79	494.66	160.61	618.61	668.23	161.68	501.39	838.81
Am_Rn_068695	F:GO:0004750; C:GO:0005829; P:GO:0009052; P:GO:0015976; P:GO:0019323; P:GO:0044262; F:GO:0046872	F:D-ribulose-phosphate 3-epimerase activity; C:cytosol; P:pentose-phosphate shunt, non-oxidative branch; P:carbon utilization; P:pentose catabolic process; P:cellular carbohydrate metabolic process; F:metal ion binding	K01783	rpe, RPE; ribulose-phosphate 3-epimerase [EC:5.1.3.1]	A 9100 Metabolism; B 09101 Carbohydrate metabolism; C 00030 Pentose phosphate pathway [PATH:ko00030]|A 9100 Metabolism; B 09101 Carbohydrate metabolism; C 00040 Pentose and glucuronate interconversions [PATH:ko00040]|A 9100 Metabolism; B 09102 Energy metabolism; C 00710 Carbon fixation in photosynthetic organisms [PATH:ko00710]	601.101	0.283321	0.233019	1.21587	0.224035	0.323631	601.101	-0.558799	0.231738	-2.41134	0.0158941	0.0315617	601.101	0.245773	0.232874	1.05539	0.291247	0.413502	291.66	565.62	605.15	495.41	455.76	590.32	884.3	907.27	932.82	561.11	488.11	561.02
Am_Rn_098336	.	.	.	.	.	124.153	11.468	1.4404	7.96168	1.69726e-15	2.70259e-14	124.153	5.6826	0.869627	6.53453	6.38077e-11	6.7477e-10	124.153	10.5383	1.4404	7.31622	2.55061e-13	5.82819e-12	538.17	519.1	142.76	0	0	0	15.33	10	4	1	0	0
Am_Rn_052915	F:GO:0005506; P:GO:0007275; P:GO:0010268; C:GO:0016021; P:GO:0016125; P:GO:0016132; F:GO:0016709; F:GO:0020037	F:iron ion binding; P:multicellular organism development; P:brassinosteroid homeostasis; C:integral component of membrane; P:sterol metabolic process; P:brassinosteroid biosynthetic process; F:oxidoreductase activity, acting on paired donors, with incorporation or reduction of molecular oxygen, NAD(P)H as one donor, and incorporation of one atom of oxygen; F:heme binding	K12637	CYP90C1, ROT3; 3-epi-6-deoxocathasterone 23-monooxygenase [EC:1.14.14.147]	A 9100 Metabolism; B 09109 Metabolism of terpenoids and polyketides; C 00905 Brassinosteroid biosynthesis [PATH:ko00905]	123.351	7.2657	0.923796	7.86505	3.68943e-15	5.63933e-14	123.351	6.73625	0.889553	7.57262	3.65777e-14	6.21352e-13	123.351	10.5342	1.42665	7.38385	1.5378e-13	3.65215e-12	115	388	725	2	6	2	8	3	3	0	1	0
Am_Rn_000937	P:GO:0006493; F:GO:0016757	P:protein O-linked glycosylation; F:glycosyltransferase activity	K09667	OGT; protein O-GlcNAc transferase [EC:2.4.1.255]	A 9100 Metabolism; B 09107 Glycan biosynthesis and metabolism; C 00514 Other types of O-glycan biosynthesis [PATH:ko00514]|A 9160 Human Diseases; B 09167 Endocrine and metabolic disease; C 04931 Insulin resistance [PATH:ko04931]	1392.41	0.0335972	0.252372	0.133125	0.894094	0.950947	1392.41	-0.46223	0.252071	-1.83373	0.0666941	0.11108	1392.41	-0.158142	0.252218	-0.627008	0.530654	0.65516	997.34	1233.09	872.14	1099.99	1073.54	1800.51	1922.24	1932.64	1555.58	1714.69	1603.93	1230.61
Am_Rn_000941	F:GO:0004842; P:GO:0016567; F:GO:0016746; F:GO:0016874	F:ubiquitin-protein transferase activity; P:protein ubiquitination; F:acyltransferase activity; F:ligase activity	.	.	.	812.856	-0.0357667	0.327698	-0.109145	0.913087	0.965627	812.856	-0.0280357	0.327717	-0.0855487	0.931825	0.958275	812.856	-0.541853	0.327278	-1.65563	0.0977961	0.169748	758.71	670.11	347.35	728.24	761.16	899.46	906.76	680.36	722.54	1231.49	1012.04	1212.02
Am_Rn_058489	C:GO:0016021	C:integral component of membrane	.	.	.	316.305	-0.286364	0.237761	-1.20442	0.228428	0.328887	316.305	-0.560367	0.237011	-2.36431	0.0180637	0.035325	316.305	-0.486316	0.237081	-2.05127	0.040241	0.0804435	140.79	294.65	192.48	275.75	335.87	365.37	327.93	425.87	422.65	335.13	337.38	474.61
Am_Rn_195754	F:GO:0004672; F:GO:0004842; F:GO:0005524; P:GO:0006468; P:GO:0016567	F:protein kinase activity; F:ubiquitin-protein transferase activity; F:ATP binding; P:protein phosphorylation; P:protein ubiquitination	.	.	.	436.821	13.3105	4.24711	3.13402	0.00172427	0.00454499	436.821	13.3017	4.24711	3.13193	0.0017366	0.00442106	436.821	10.5298	4.14576	2.53991	0.0110882	0.0267627	2811.1	1352.63	0.86	0	0	0	0	0	0	0	0	3.77
Am_Rn_000957	.	.	.	.	.	254.686	0.928258	0.719388	1.29034	0.196931	0.290461	254.686	-0.202903	0.717688	-0.282717	0.777393	0.836242	254.686	-0.0712227	0.717774	-0.0992272	0.920958	0.96937	257.09	254.86	163.35	209.01	165.08	72.74	515.36	337.38	94.96	536.49	224.75	173.56
Am_Rn_000958	F:GO:0016772; P:GO:0044237	F:transferase activity, transferring phosphorus-containing groups; P:cellular metabolic process	.	.	.	198.553	12.1329	4.18078	2.90207	NA	NA	198.553	5.10924	4.01506	1.27252	NA	NA	198.553	12.165	4.18078	2.90975	NA	NA	362.9	1235.08	395.19	0	0	0	0.01	73.56	0	0	0	0
Am_Rn_000960	C:GO:0000123; F:GO:0004402; C:GO:0005669; F:GO:0017025; P:GO:0019538; P:GO:0042967; F:GO:0043565; P:GO:0045944	C:histone acetyltransferase complex; F:histone acetyltransferase activity; C:transcription factor TFIID complex; F:TBP-class protein binding; P:protein metabolic process; P:obsolete acyl-carrier-protein biosynthetic process; F:sequence-specific DNA binding; P:positive regulation of transcription by RNA polymerase II	K03125	TAF1; transcription initiation factor TFIID subunit 1 [EC:2.3.1.48 2.7.11.1]	A 9120 Genetic Information Processing; B 09121 Transcription; C 03022 Basal transcription factors [PATH:ko03022]	610.829	-0.0700634	0.245276	-0.285651	0.775146	0.85893	610.829	0.379513	0.245978	1.54288	0.122861	0.188587	610.829	0.342411	0.245831	1.39287	0.163659	0.259442	522.35	402.53	738.93	748.75	693.01	847.87	456.23	553.33	669.54	558.95	545.68	652.44
Am_Rn_020544	F:GO:0003824; P:GO:0006259; F:GO:0043167; F:GO:0097159; F:GO:1901363	F:catalytic activity; P:DNA metabolic process; F:ion binding; F:organic cyclic compound binding; F:heterocyclic compound binding	.	.	.	61.8867	4.98676	1.82135	2.73794	0.00618255	0.0142901	61.8867	10.4389	2.14919	4.85715	1.19089e-06	5.94158e-06	61.8867	10.4799	2.14919	4.87621	1.08146e-06	7.42447e-06	152.66	442.52	25.06	12.51	9.73	0	0.19	0	0	0	0	0
Am_Rn_076513	.	.	.	.	.	2620.52	-13.1696	1.58618	-8.30269	1.01776e-16	1.84387e-15	2620.52	-13.8621	1.58614	-8.73948	2.34184e-18	6.8045e-17	2620.52	-14.4893	1.58612	-9.13504	6.53806e-20	3.86921e-18	0	0	0	5472.03	291.73	498.25	6177.74	2019.64	1671.24	6047.27	6730.66	3946.9
Am_Rn_034525	.	.	.	.	.	1975.84	-13.5695	1.7713	-7.66076	1.84842e-14	2.60839e-13	1975.84	-12.1026	1.77142	-6.83216	8.36427e-12	1.01506e-10	1975.84	-14.2107	1.77127	-8.02289	1.03286e-15	3.36185e-14	0	0	0	2297.43	3632.16	2713.57	509.5	1264.45	1464.76	45.88	13015.8	631.83
Am_Rn_000974	F:GO:0003677; C:GO:0005634	F:DNA binding; C:nucleus	.	.	.	408.24	0.679809	0.628482	1.08167	0.2794	0.388541	408.24	0.397448	0.628223	0.632655	0.526959	0.626124	408.24	0.716807	0.628483	1.14054	0.254063	0.370958	884.05	245.56	154.72	313.69	370.88	414.27	333.92	544.49	458.59	199.54	507.11	385.45
Am_Rn_065072	C:GO:0016021	C:integral component of membrane	.	.	.	60.4228	9.47842	2.30346	4.11486	3.8742e-05	0.000143968	60.4228	6.48254	2.04051	3.17691	0.00148851	0.00385541	60.4228	10.4723	2.30346	4.54632	5.45911e-06	3.19583e-05	276.68	316.25	0	0	0	1	4.77	2.21	1	0	0	0
Am_Rn_000978	F:GO:0005488; P:GO:0006259; F:GO:0016779	F:binding; P:DNA metabolic process; F:nucleotidyltransferase activity	K03006	RPB1, POLR2A; DNA-directed RNA polymerase II subunit RPB1 [EC:2.7.7.6]	A 9120 Genetic Information Processing; B 09121 Transcription; C 03020 RNA polymerase [PATH:ko03020]|A 9160 Human Diseases; B 09164 Neurodegenerative disease; C 05016 Huntington disease [PATH:ko05016]	311.012	0.113181	0.671185	0.168629	0.866088	0.930503	311.012	0.506976	0.671593	0.754886	0.450317	0.557126	311.012	1.48912	0.673106	2.21231	0.026945	0.0574599	718.7	114.64	135.55	473.24	290.9	479.08	316.88	242.56	373.63	176.67	133.91	176.64
Am_Rn_004523	.	.	.	.	.	251.296	7.15339	1.20457	5.93856	2.87532e-09	2.05729e-08	251.296	2.51515	1.16042	2.16745	0.0302009	0.0555763	251.296	10.4653	1.54804	6.76036	1.37651e-11	2.40594e-10	872.69	101.27	1051.67	13.18	0.45	6.03	263.07	63.26	123.48	0	0	1.96
Am_Rn_045554	.	.	.	.	.	62.5582	4.95081	1.96837	2.51519	0.0118969	0.0256294	62.5582	3.63005	1.95478	1.85701	0.0633094	0.106179	62.5582	10.3858	2.27434	4.56651	4.959e-06	2.93532e-05	321.02	220.91	2.69	0	11.79	12.45	0	32.85	29.04	0	0	0
Am_Rn_000986	P:GO:0016311; F:GO:0033883	P:dephosphorylation; F:pyridoxal phosphatase activity	K07025	K07025; putative hydrolase of the HAD superfamily	None	295.754	-1.01007	3.09186	-0.326687	0.743905	0.833117	295.754	0.231756	3.09217	0.0749494	0.940255	0.964473	295.754	-0.296955	3.09199	-0.0960399	0.923489	0.970725	72.76	547.41	0	539.54	880.54	0	84.57	553.13	0	382.23	539.92	0
Am_Rn_074761	.	.	K13434	PTI6; pathogenesis-related genes transcriptional activator PTI6	A 9150 Organismal Systems; B 09159 Environmental adaptation; C 04626 Plant-pathogen interaction [PATH:ko04626]	421.146	9.99787	1.32661	7.53641	4.83084e-14	6.51278e-13	421.146	5.40436	1.1718	4.61201	3.9879e-06	1.79821e-05	421.146	10.3817	1.36782	7.58997	3.19979e-14	8.3617e-13	2139.24	221.69	1510.74	0	4.91	0	29.08	61.5	34.11	4.33	0	0
Am_Rn_013749	F:GO:0003677; C:GO:0016021	F:DNA binding; C:integral component of membrane	.	.	.	140.806	-0.430097	0.248568	-1.7303	0.083577	0.141055	140.806	-0.564037	0.24786	-2.27562	0.0228685	0.0434891	140.806	-0.282372	0.249272	-1.13279	0.257304	0.374737	92.9	112.86	72.05	129.59	163.21	194.22	171.15	143.02	214.08	136.68	163.07	145.91
Am_Rn_083103	C:GO:0005576; F:GO:0030570	C:extracellular region; F:pectate lyase activity	K19551	pelC; pectate lyase C [EC:4.2.2.2 4.2.2.10]	A 9100 Metabolism; B 09101 Carbohydrate metabolism; C 00040 Pentose and glucuronate interconversions [PATH:ko00040]	55.8234	10.3438	2.97603	3.4757	0.000509529	0.00150763	55.8234	10.3349	2.97603	3.47271	0.00051523	0.00148828	55.8234	10.3758	2.97603	3.48647	0.000489433	0.00174762	6	63	490	0	0	0	0	0	0	0	0	0
Am_Rn_013960	F:GO:0005524; C:GO:0005634; C:GO:0005829; F:GO:0016887; P:GO:0030433; P:GO:0030970; F:GO:0031593; C:GO:0034098; P:GO:0051228; P:GO:0051301; P:GO:0071712; P:GO:0097352	F:ATP binding; C:nucleus; C:cytosol; F:ATP hydrolysis activity; P:ubiquitin-dependent ERAD pathway; P:retrograde protein transport, ER to cytosol; F:polyubiquitin modification-dependent protein binding; C:VCP-NPL4-UFD1 AAA ATPase complex; P:mitotic spindle disassembly; P:cell division; P:ER-associated misfolded protein catabolic process; P:autophagosome maturation	K13525	VCP, CDC48; transitional endoplasmic reticulum ATPase	A 9120 Genetic Information Processing; B 09123 Folding, sorting and degradation; C 04141 Protein processing in endoplasmic reticulum [PATH:ko04141]|A 9160 Human Diseases; B 09171 Infectious disease: bacterial; C 05134 Legionellosis [PATH:ko05134]|A 9160 Human Diseases; B 09164 Neurodegenerative disease; C 05014 Amyotrophic lateral sclerosis [PATH:ko05014]|A 9160 Human Diseases; B 09164 Neurodegen…	2723.14	-0.594269	0.171365	-3.46787	0.00052461	0.0015485	2723.14	-0.565449	0.171382	-3.29934	0.000969124	0.00262794	2723.14	-0.454419	0.171411	-2.65105	0.00802412	0.0202288	1681.1	1672.07	1670.12	3114.04	2700.83	4140.21	3308.1	2940.36	3282.09	3083.76	3177.42	2873.15
Am_Rn_045991	P:GO:0005975; F:GO:0008422; P:GO:0009651; P:GO:0019762; F:GO:0102483	P:carbohydrate metabolic process; F:beta-glucosidase activity; P:response to salt stress; P:glucosinolate catabolic process; F:scopolin beta-glucosidase activity	K01188	E3.2.1.21; beta-glucosidase [EC:3.2.1.21]	A 9100 Metabolism; B 09101 Carbohydrate metabolism; C 00500 Starch and sucrose metabolism [PATH:ko00500]|A 9100 Metabolism; B 09106 Metabolism of other amino acids; C 00460 Cyanoamino acid metabolism [PATH:ko00460]|A 9100 Metabolism; B 09110 Biosynthesis of other secondary metabolites; C 00999 Biosynthesis of various plant secondary metabolites [PATH:ko00999]	532.84	13.2018	1.86889	7.06399	1.61788e-12	1.80805e-11	532.84	1.66256	1.45137	1.14551	0.251996	0.346391	532.84	10.3627	1.61886	6.40121	1.54155e-10	2.21256e-09	59	362.29	3621.45	0	0	0	197.31	961.77	531.3	0	4.26	0
Am_Rn_136747	P:GO:0006869; F:GO:0008289; C:GO:0016021	P:lipid transport; F:lipid binding; C:integral component of membrane	.	.	.	7810.7	-15.9956	1.2048	-13.2766	3.16377e-40	3.75578e-38	7810.7	-15.8442	1.2048	-13.151	1.68026e-39	3.9433e-37	7810.7	-13.9868	1.20485	-11.6088	3.71959e-31	6.60373e-29	0	0	0	13809.3	12094.4	21591	10424.7	17063.3	14804.6	4278.98	4348.95	3196.64
Am_Rn_104130	.	.	.	.	.	54.6968	10.3141	4.24751	2.42828	0.0151708	0.0317955	54.6968	10.3052	4.24751	2.42618	0.0152586	0.0304343	54.6968	10.3462	4.24751	2.43583	0.0148578	0.0344612	0	16	528	0	0	0	0	0	0	0	0	0
Am_Rn_040424	F:GO:0097159; F:GO:1901363	F:organic cyclic compound binding; F:heterocyclic compound binding	.	.	.	54.674	10.3099	1.86555	5.52647	3.26734e-08	2.00247e-07	54.674	8.43019	1.76747	4.76964	1.84557e-06	8.89377e-06	54.674	10.342	1.86555	5.54367	2.96205e-08	2.81722e-07	20.4	374.18	180.44	0.32	0	0	1	0	1.34	0	0	0
Am_Rn_105486	.	.	.	.	.	54.219	10.3016	3.28529	3.13568	0.00171454	0.00452422	54.219	10.2928	3.28529	3.13298	0.00173042	0.0044068	54.219	10.3337	3.28529	3.14545	0.00165834	0.00510531	2	26	512	0	0	0	0	0	0	0	0	0
Am_Rn_070407	C:GO:0016021	C:integral component of membrane	.	.	.	371.805	0.132597	0.228269	0.580882	0.56132	0.672293	371.805	-0.572947	0.226492	-2.52966	0.0114174	0.0235738	371.805	-0.029925	0.227673	-0.131439	0.895428	0.951111	199.08	353.88	292.63	298.21	310.93	381.54	584.99	469.12	525.12	320.21	387.42	422.87
Am_Rn_089528	F:GO:0003735; P:GO:0006412; C:GO:0022627; P:GO:0042254	F:structural constituent of ribosome; P:translation; C:cytosolic small ribosomal subunit; P:ribosome biogenesis	K02984	RP-S3Ae, RPS3A; small subunit ribosomal protein S3Ae	A 9120 Genetic Information Processing; B 09122 Translation; C 03010 Ribosome [PATH:ko03010]|A 9160 Human Diseases; B 09172 Infectious disease: viral; C 05171 Coronavirus disease - COVID-19 [PATH:ko05171]	53.9267	10.294	1.93962	5.3072	1.1132e-07	6.28237e-07	53.9267	10.2851	1.93962	5.30262	1.14151e-07	6.95967e-07	53.9267	10.3261	1.93962	5.32374	1.01655e-07	8.66671e-07	126	119	288	0	0	0	0	0	0	0	0	0
Am_Rn_001037	.	.	.	.	.	340.165	0.236747	0.362322	0.653414	0.513489	0.62878	340.165	0.0741628	0.36205	0.204841	0.837696	0.885898	340.165	0.419104	0.362616	1.15578	0.247772	0.363693	387.38	331.96	224.11	290.33	356.81	404.82	199.12	522.06	477.94	231.08	368.34	344.92
Am_Rn_073262	.	.	.	.	.	54.7697	5.66111	1.80636	3.13398	0.0017245	0.00454499	54.7697	6.69196	1.85103	3.61525	0.000300056	0.000915623	54.7697	10.3071	2.12039	4.86094	1.16828e-06	7.96266e-06	69.04	162.45	304.58	0	0	15.25	0	2.88	3.93	0	0	0
Am_Rn_054621	F:GO:0004553; P:GO:0005975	F:hydrolase activity, hydrolyzing O-glycosyl compounds; P:carbohydrate metabolic process	K01210	E3.2.1.58; glucan 1,3-beta-glucosidase [EC:3.2.1.58]	A 9100 Metabolism; B 09101 Carbohydrate metabolism; C 00500 Starch and sucrose metabolism [PATH:ko00500]	53.0228	10.2694	3.36788	3.04923	0.00229426	0.00588199	53.0228	10.2606	3.36788	3.04659	0.00231449	0.00570886	53.0228	10.3015	3.36788	3.05876	0.00222257	0.0066288	2	14	511	0	0	0	0	0	0	0	0	0
Am_Rn_088834	C:GO:0016021	C:integral component of membrane	.	.	.	52.8885	10.2658	3.11169	3.29911	0.000969907	0.00270089	52.8885	10.2569	3.11169	3.29626	0.000979821	0.00265271	52.8885	10.2979	3.11169	3.30942	0.000934892	0.00308896	7	23	496	0	0	0	0	0	0	0	0	0
Am_Rn_033617	P:GO:0010088	P:phloem development	.	.	.	1691.33	-13.36	1.73234	-7.71211	1.23754e-14	1.78011e-13	1691.33	-12.0399	1.73246	-6.94959	3.66347e-12	4.72596e-11	1691.33	-13.9364	1.73231	-8.04495	8.62784e-16	2.84302e-14	0	0	0	1937.52	2863.83	2731.66	130.28	1411.79	1645.81	132.55	10479.1	718.67
Am_Rn_059816	.	.	.	.	.	52.246	10.2482	3.26537	3.13844	0.00169852	0.00448659	52.246	10.2393	3.26537	3.13572	0.00171436	0.00436953	52.246	10.2802	3.26537	3.14826	0.00164246	0.00506093	2	32	487	0	0	0	0	0	0	0	0	0
Am_Rn_077783	F:GO:0004806; P:GO:0016042; P:GO:0046486	F:triglyceride lipase activity; P:lipid catabolic process; P:glycerolipid metabolic process	.	.	.	51.8514	-19.829	2.88343	-6.87688	6.11772e-12	6.29708e-11	51.8514	-21.9659	2.88116	-7.62397	2.45984e-14	4.25679e-13	51.8514	-13.8754	3.05332	-4.54437	5.50987e-06	3.22297e-05	0	0	0	0	117	0	299	131	74	2	0	0
Am_Rn_001076	P:GO:0000902; C:GO:0005886; C:GO:0005938	P:cell morphogenesis; C:plasma membrane; C:cell cortex	.	.	.	353.716	0.456838	0.459118	0.995034	0.31972	0.433237	353.716	0.0976339	0.458609	0.212891	0.831412	0.880748	353.716	0.320284	0.45885	0.698015	0.485168	0.613322	118.22	496.95	431.98	344.28	299.52	306.88	343.19	530.02	346.61	347.35	458.46	265.25
Am_Rn_061307	.	.	.	.	.	9228.05	-15.8865	1.27206	-12.4888	8.59421e-36	7.36519e-34	9228.05	-13.2381	1.27211	-10.4064	2.31818e-25	1.49525e-23	9228.05	-13.8651	1.27209	-10.8995	1.15909e-27	1.47628e-25	0	0	1	33619.2	19583.6	31275	2289.42	4584.61	7015.41	9710.13	7781.73	3567.24
Am_Rn_062320	C:GO:0009941; C:GO:0016021	C:chloroplast envelope; C:integral component of membrane	.	.	.	261.904	-0.661639	0.152988	-4.32476	1.52695e-05	6.08804e-05	261.904	-0.579591	0.153439	-3.77734	0.000158513	0.000515409	261.904	-0.298446	0.154717	-1.92898	0.0537329	0.102589	146	163	181	353.88	288	362	276.42	337	331.65	260	269.66	267.16
Am_Rn_021960	F:GO:0016874	F:ligase activity	.	.	.	481.247	-0.498581	0.194228	-2.56698	0.0102587	0.0224716	481.247	-0.581318	0.194075	-2.99533	0.00274147	0.00665125	481.247	-0.380953	0.194415	-1.95948	0.0500568	0.0968056	220.11	365.6	340.83	513.79	534.4	636	446.93	655.58	685.31	426.25	593.61	562.17
Am_Rn_027946	P:GO:0010088	P:phloem development	.	.	.	5143.5	-11.0515	1.50957	-7.32095	2.46223e-13	3.03148e-12	5143.5	-11.2006	1.50957	-7.41974	1.17351e-13	1.84739e-12	5143.5	-13.647	1.5095	-9.04072	1.55637e-19	8.75091e-18	0	1	2	2313.22	4233.88	1330.02	2306.23	3176.34	3569.9	916.19	48040.5	454.05
Am_Rn_089623	.	.	.	.	.	51.781	10.2353	3.21578	3.18283	0.00145844	0.00390757	51.781	10.2264	3.21578	3.18007	0.00147242	0.00382184	51.781	10.2674	3.21578	3.1928	0.00140899	0.00442627	2.9	29.14	483.76	0	0	0	0	0	0	0	0	0
Am_Rn_001119	F:GO:0008270	F:zinc ion binding	.	.	.	954.133	0.81506	1.1785	0.691611	0.489182	0.605479	954.133	2.24128	1.17898	1.90104	0.0572973	0.0973537	954.133	1.16398	1.17856	0.987628	0.323335	0.449048	1272.37	1990.22	1044.95	869.18	1147.43	1117.67	0	555.91	690.98	448.88	855.37	1228.12
Am_Rn_001122	.	.	.	.	.	283.496	0.420913	1.25252	0.336053	0.736831	0.8272	283.496	1.03113	1.25316	0.822824	0.410608	0.518658	283.496	-0.699926	1.25187	-0.559105	0.57609	0.696491	60.43	294.81	395.49	66.93	229.31	439.97	0	182.06	315.15	266.93	572.04	739.26
Am_Rn_001125	P:GO:0000390; F:GO:0003723; F:GO:0004386; F:GO:0005524; F:GO:0016787; C:GO:0071013	P:spliceosomal complex disassembly; F:RNA binding; F:helicase activity; F:ATP binding; F:hydrolase activity; C:catalytic step 2 spliceosome	K12818	DHX8, PRP22; ATP-dependent RNA helicase DHX8/PRP22 [EC:3.6.4.13]	A 9120 Genetic Information Processing; B 09121 Transcription; C 03040 Spliceosome [PATH:ko03040]	686.949	0.320758	0.31712	1.01147	0.31179	0.424813	686.949	0.504	0.317344	1.58818	0.112246	0.174453	686.949	0.30015	0.31706	0.946666	0.343809	0.471536	951.44	515.12	537.51	712.56	676.68	736.63	536.77	634.81	703.28	553.06	853.07	806.39
Am_Rn_026506	F:GO:0004322; F:GO:0005507; C:GO:0005886; P:GO:0006826; P:GO:0015994; P:GO:0046274; C:GO:0048046; F:GO:0052716; P:GO:0055072	F:ferroxidase activity; F:copper ion binding; C:plasma membrane; P:iron ion transport; P:chlorophyll metabolic process; P:lignin catabolic process; C:apoplast; F:hydroquinone:oxygen oxidoreductase activity; P:iron ion homeostasis	K05909	E1.10.3.2; laccase [EC:1.10.3.2]	None	469.944	9.04745	1.36023	6.65141	2.903e-11	2.73695e-10	469.944	7.26346	1.31141	5.53866	3.04797e-08	2.05549e-07	469.944	10.2381	1.44109	7.1044	1.20849e-12	2.4913e-11	124.58	1645.38	2991.48	8.95	0	1.59	13.24	4.59	21.44	4.73	0	0.03
Am_Rn_001134	F:GO:0003677; F:GO:0004386	F:DNA binding; F:helicase activity	.	.	.	878.588	-0.424371	0.41393	-1.02522	0.305257	0.417759	878.588	0.406883	0.414459	0.981721	0.326238	0.429962	878.588	0.144199	0.414227	0.348117	0.727752	0.826672	933.99	567.81	633.2	1296.73	1209.05	1268.67	305.97	975.99	912.33	581.93	1053.6	979.65
Am_Rn_001136	F:GO:0003676; F:GO:0003964; P:GO:0006278; P:GO:0015074; C:GO:0016021	F:nucleic acid binding; F:RNA-directed DNA polymerase activity; P:RNA-templated DNA biosynthetic process; P:DNA integration; C:integral component of membrane	.	.	.	451.516	-0.497851	0.381533	-1.30487	0.191937	0.284373	451.516	0.413567	0.382695	1.08067	0.279844	0.377927	451.516	0.470605	0.38271	1.22966	0.218823	0.329167	284.49	270.11	594.97	556.2	820.36	733.36	246.73	426.77	464.39	292.88	484.72	322.17
Am_Rn_038574	C:GO:0005886	C:plasma membrane	.	.	.	369.79	9.02185	1.37443	6.56404	5.23675e-11	4.79208e-10	369.79	11.2695	1.65862	6.79452	1.08673e-11	1.29918e-10	369.79	10.229	1.47516	6.93418	4.08597e-12	7.76732e-11	2123.76	296.19	1043.46	0	7.23	2.44	0	0	2.27	0	3.73	0
Am_Rn_001151	F:GO:0003824	F:catalytic activity	.	.	.	428.263	-0.171454	0.328591	-0.521786	0.60182	0.709436	428.263	-0.00826472	0.328876	-0.0251302	0.979951	0.993696	428.263	-0.224332	0.328459	-0.682983	0.494618	0.621699	429.11	319.12	226.06	440.18	461.22	546.3	273.3	531.49	501.93	383.34	626.72	519.48
Am_Rn_001153	F:GO:0016491; F:GO:0034061; F:GO:0050660; P:GO:0071897	F:oxidoreductase activity; F:DNA polymerase activity; F:flavin adenine dinucleotide binding; P:DNA biosynthetic process	K20102	YTHDF; YTH domain-containing family protein	None	706.508	0.821264	1.23986	0.662386	0.507724	0.623088	706.508	1.82515	1.24022	1.47164	0.141119	0.212535	706.508	1.66558	1.24012	1.34308	0.179247	0.279748	1230.56	1924.12	137.94	787.95	1386.8	85.21	237.14	920.87	17	399.7	816.54	119.68
Am_Rn_011106	P:GO:0006687; F:GO:0008195; P:GO:0009395; P:GO:0016311; P:GO:0046486	P:glycosphingolipid metabolic process; F:phosphatidate phosphatase activity; P:phospholipid catabolic process; P:dephosphorylation; P:glycerolipid metabolic process	K15728	LPIN; phosphatidate phosphatase LPIN [EC:3.1.3.4]	A 9100 Metabolism; B 09103 Lipid metabolism; C 00561 Glycerolipid metabolism [PATH:ko00561]|A 9100 Metabolism; B 09103 Lipid metabolism; C 00564 Glycerophospholipid metabolism [PATH:ko00564]|A 9130 Environmental Information Processing; B 09132 Signal transduction; C 04150 mTOR signaling pathway [PATH:ko04150]|A 9160 Human Diseases; B 09167 Endocrine and metabolic disease; C 04936 Alcoholic liver …	565.504	-0.748607	0.201643	-3.71254	0.000205186	0.000661386	565.504	-0.582922	0.201932	-2.88673	0.00389265	0.00908513	565.504	-0.0403438	0.202949	-0.198788	0.842429	0.912483	288.94	390.72	403.78	874.57	628.2	842.55	526.31	743.68	837.06	538.79	503.03	421.86
Am_Rn_050426	C:GO:0043231; F:GO:0080043; F:GO:0080044	C:intracellular membrane-bounded organelle; F:quercetin 3-O-glucosyltransferase activity; F:quercetin 7-O-glucosyltransferase activity	.	.	.	1610.27	-10.9399	1.73231	-6.31521	2.69798e-10	2.23736e-09	1610.27	-13.9072	1.73193	-8.02986	9.75848e-16	2.05609e-14	1610.27	-13.5039	1.73195	-7.79695	6.342e-15	1.81428e-13	0	0	0	137	1187.39	11	4228.48	3359.09	3110.84	3300.15	464.18	4812.46
Am_Rn_087712	F:GO:0003677; C:GO:0005634; C:GO:0005840; C:GO:0016021	F:DNA binding; C:nucleus; C:ribosome; C:integral component of membrane	K02947	RP-S10e, RPS10; small subunit ribosomal protein S10e	A 9120 Genetic Information Processing; B 09122 Translation; C 03010 Ribosome [PATH:ko03010]|A 9160 Human Diseases; B 09172 Infectious disease: viral; C 05171 Coronavirus disease - COVID-19 [PATH:ko05171]	866.703	0.0835301	0.208587	0.400457	0.68882	0.78601	866.703	-0.58405	0.207748	-2.81133	0.00493369	0.0111896	866.703	-0.452564	0.207835	-2.17751	0.0294422	0.0619909	507.59	641.48	645.23	703.3	688.25	797.49	1318.61	987.41	1086.42	940.97	1080	1222.66
Am_Rn_069916	F:GO:0005198; P:GO:0015031; C:GO:0031080; C:GO:0035859; P:GO:1904263	F:structural molecule activity; P:protein transport; C:nuclear pore outer ring; C:Seh1-associated complex; P:positive regulation of TORC1 signaling	K14299	SEH1; nucleoporin SEH1	A 9120 Genetic Information Processing; B 09122 Translation; C 03013 Nucleocytoplasmic transport [PATH:ko03013]|A 9130 Environmental Information Processing; B 09132 Signal transduction; C 04150 mTOR signaling pathway [PATH:ko04150]|A 9160 Human Diseases; B 09164 Neurodegenerative disease; C 05014 Amyotrophic lateral sclerosis [PATH:ko05014]	211.073	-0.511396	0.263776	-1.93876	0.0525311	0.0944664	211.073	-0.584169	0.26355	-2.21654	0.0266546	0.0497953	211.073	-0.473616	0.263784	-1.79547	0.0725787	0.132345	131.94	122.5	138.05	232.79	213.54	283.85	301.41	202.66	242.88	262.25	238.49	223.14
Am_Rn_083227	F:GO:0015078; C:GO:0016021; C:GO:0033179; P:GO:1902600; P:GO:1902600	F:proton transmembrane transporter activity; C:integral component of membrane; C:proton-transporting V-type ATPase, V0 domain; P:proton transmembrane transport; P:proton transmembrane transport	K03661	ATPeV0B, ATP6F; V-type H+-transporting ATPase 21kDa proteolipid subunit	A 9100 Metabolism; B 09102 Energy metabolism; C 00190 Oxidative phosphorylation [PATH:ko00190]|A 9140 Cellular Processes; B 09141 Transport and catabolism; C 04145 Phagosome [PATH:ko04145]|A 9140 Cellular Processes; B 09141 Transport and catabolism; C 04142 Lysosome [PATH:ko04142]|A 9150 Organismal Systems; B 09156 Nervous system; C 04721 Synaptic vesicle cycle [PATH:ko04721]|A 9160 Human Disease…	1245.98	0.0792736	0.180671	0.438773	0.660826	0.760884	1245.98	-0.584392	0.180053	-3.24567	0.00117174	0.00311156	1245.98	-0.014687	0.180525	-0.0813573	0.935158	0.97939	659.34	1037.63	1105.49	1013.28	1014.97	1403.55	1761.12	1688.84	1884.94	1161.99	1251.89	1298.9
Am_Rn_001208	.	.	.	.	.	269.304	-1.10769	0.604944	-1.83107	0.0670907	0.116764	269.304	-0.648396	0.605489	-1.07086	0.284231	0.382971	269.304	-0.459246	0.60569	-0.75822	0.44832	0.577706	250.74	145	30.36	448.35	281.47	503.76	229.17	333.54	330.78	296.87	260.47	238.69
Am_Rn_001216	C:GO:0016021; F:GO:0018666; P:GO:0019261; F:GO:0047544; F:GO:0071949; F:GO:0102321	C:integral component of membrane; F:2,4-dichlorophenol 6-monooxygenase activity; P:1,4-dichlorobenzene catabolic process; F:2-hydroxybiphenyl 3-monooxygenase activity; F:FAD binding; F:2,2'-hydroxybiphenyl monooxygenase activity	.	.	.	240.658	-0.487947	0.431687	-1.13033	0.258339	0.364334	240.658	0.00672958	0.432653	0.0155542	0.98759	0.998786	240.658	0.468288	0.433732	1.07967	0.280288	0.400946	163.37	282.74	142.89	326.33	303.9	432.44	137.52	362.92	259	91.94	215.4	251.39
Am_Rn_066822	C:GO:0009535; C:GO:0009654; P:GO:0010207; F:GO:0010242; P:GO:0042549	C:chloroplast thylakoid membrane; C:photosystem II oxygen evolving complex; P:photosystem II assembly; F:oxygen evolving activity; P:photosystem II stabilization	K02716	psbO; photosystem II oxygen-evolving enhancer protein 1	A 9100 Metabolism; B 09102 Energy metabolism; C 00195 Photosynthesis [PATH:ko00195]	7439.41	-14.2716	1.02913	-13.8677	9.94738e-44	1.36993e-41	7439.41	-12.9615	1.02916	-12.5943	2.26991e-36	3.68365e-34	7439.41	-13.1817	1.02915	-12.8083	1.47275e-37	4.35785e-35	0	2.13	0	15340.1	16857.1	18997.3	5868.95	7008.2	7701.66	8373.06	8914.7	7169.24
Am_Rn_001236	F:GO:0004930; C:GO:0005886; P:GO:0007186; F:GO:0015276; C:GO:0016021; P:GO:0034220	F:G protein-coupled receptor activity; C:plasma membrane; P:G protein-coupled receptor signaling pathway; F:ligand-gated ion channel activity; C:integral component of membrane; P:ion transmembrane transport	K05387	GRIP; glutamate receptor, ionotropic, plant	None	191.513	-1.84293	1.55211	-1.18737	0.235083	0.336657	191.513	-0.13684	1.55364	-0.0880771	0.929815	0.956743	191.513	-1.60969	1.55221	-1.03703	0.299721	0.422768	142.06	66.96	0	247.61	419.11	342.25	0	167.43	162.52	326.16	387.78	158.05
Am_Rn_114259	C:GO:0005576; P:GO:0019953	C:extracellular region; P:sexual reproduction	.	.	.	184.439	12.0624	1.97745	6.09997	1.06091e-09	8.0817e-09	184.439	8.3216	1.67559	4.96636	6.82219e-07	3.5634e-06	184.439	10.2257	1.8856	5.42303	5.85958e-08	5.23325e-07	1089.01	245.26	397.8	0	0	0	0	0	8.22	0	1.85	0
Am_Rn_046177	P:GO:0001887; P:GO:0006534; F:GO:0009000; C:GO:0009507; P:GO:0010269; P:GO:0018283; F:GO:0030170; F:GO:0031071	P:selenium compound metabolic process; P:cysteine metabolic process; F:selenocysteine lyase activity; C:chloroplast; P:response to selenium ion; P:iron incorporation into metallo-sulfur cluster; F:pyridoxal phosphate binding; F:cysteine desulfurase activity	K11717	sufS; cysteine desulfurase / selenocysteine lyase [EC:2.8.1.7 4.4.1.16]	A 9100 Metabolism; B 09106 Metabolism of other amino acids; C 00450 Selenocompound metabolism [PATH:ko00450]	586.382	-1.80163	0.168714	-10.6786	1.28219e-26	5.7782e-25	586.382	-0.586904	0.170945	-3.4333	0.000596282	0.00169987	586.382	-0.17159	0.172066	-0.997233	0.318651	0.443823	285.83	281.21	247.54	1246.31	1041.95	1418.95	517.31	552.4	503.76	408.65	419.55	388.63
Am_Rn_001252	F:GO:0003677; F:GO:0003678; F:GO:0005524; C:GO:0005634; C:GO:0005657; F:GO:0016787; P:GO:0032508; P:GO:0040029; P:GO:0045944	F:DNA binding; F:DNA helicase activity; F:ATP binding; C:nucleus; C:replication fork; F:hydrolase activity; P:DNA duplex unwinding; P:epigenetic regulation of gene expression; P:positive regulation of transcription by RNA polymerase II	.	.	.	1925.22	-0.301312	0.357371	-0.843135	0.399153	0.517828	1925.22	0.257243	0.357561	0.719438	0.471871	0.57696	1925.22	-0.0282254	0.357441	-0.0789653	0.93706	0.980821	1266.47	1876.46	1574.38	2359.23	2360.31	2755.82	689.68	2249.64	2296.47	1505.87	2355.75	2463.71
Am_Rn_001253	F:GO:0003677; C:GO:0005634; F:GO:0008270	F:DNA binding; C:nucleus; F:zinc ion binding	.	.	.	762.007	-0.442591	0.539232	-0.82078	0.411771	0.529806	762.007	0.526038	0.539805	0.974497	0.32981	0.433901	762.007	0.0141873	0.539431	0.0263004	0.979018	1	396.32	1071.32	462.46	1085.03	1035.81	1170.79	137.39	845.6	775.28	866.64	904.3	673.08
Am_Rn_103176	F:GO:0000035; F:GO:0000036; C:GO:0005739; P:GO:0006633; P:GO:0006810; P:GO:0042967	F:acyl binding; F:acyl carrier activity; C:mitochondrion; P:fatty acid biosynthetic process; P:transport; P:obsolete acyl-carrier-protein biosynthetic process	K03955	NDUFAB1; NADH dehydrogenase (ubiquinone) 1 alpha/beta subcomplex 1, acyl-carrier protein	A 9100 Metabolism; B 09102 Energy metabolism; C 00190 Oxidative phosphorylation [PATH:ko00190]|A 9100 Metabolism; B 09103 Lipid metabolism; C 00061 Fatty acid biosynthesis [PATH:ko00061]|A 9150 Organismal Systems; B 09156 Nervous system; C 04723 Retrograde endocannabinoid signaling [PATH:ko04723]|A 9150 Organismal Systems; B 09159 Environmental adaptation; C 04714 Thermogenesis [PATH:ko04714]|A 9…	500.966	0.596435	0.212579	2.80571	0.00502064	0.0118823	500.966	-0.588018	0.210018	-2.79985	0.00511263	0.0115533	500.966	0.314392	0.211673	1.48527	0.137471	0.225202	394.57	436.37	420.74	298.45	361.41	419.96	914.2	668.41	806.62	434.72	404.19	496.3
Am_Rn_001277	.	.	.	.	.	120.556	4.39456	2.54447	1.7271	0.0841501	0.141881	120.556	5.05639	2.54835	1.98418	0.0472353	0.0822124	120.556	3.47365	2.54132	1.36687	0.171666	0.270219	314.11	598	135.79	0	59.51	0	0	0	43.97	78.38	42.09	0
Am_Rn_049978	.	.	.	.	.	49.207	10.1618	3.00442	3.38228	0.000718877	0.00205961	49.207	10.1529	3.00442	3.37932	0.000726656	0.00202832	49.207	10.1938	3.00442	3.39295	0.000691437	0.00237357	6	59	428	0	0	0	0	0	0	0	0	0
Am_Rn_001283	C:GO:0000325; F:GO:0005524; C:GO:0005774; C:GO:0016021; F:GO:0016887; F:GO:0042626; P:GO:0055085	C:plant-type vacuole; F:ATP binding; C:vacuolar membrane; C:integral component of membrane; F:ATP hydrolysis activity; F:ATPase-coupled transmembrane transporter activity; P:transmembrane transport	.	.	.	190.432	2.36488	1.85046	1.278	0.201251	0.295617	190.432	1.15565	1.84922	0.62494	0.532011	0.626853	190.432	2.26628	1.85026	1.22485	0.220633	0.331431	20.03	1041.79	55.14	6.23	237.8	0	9.9	511.19	94.78	18.21	238.22	22.24
Am_Rn_001284	F:GO:0004521; F:GO:0004674; F:GO:0005524; P:GO:0006397; P:GO:0006468; P:GO:0009069; C:GO:0016021; P:GO:0036498; F:GO:0051082; P:GO:0051252; P:GO:0070059; P:GO:0090502; C:GO:1990604	F:endoribonuclease activity; F:protein serine/threonine kinase activity; F:ATP binding; P:mRNA processing; P:protein phosphorylation; P:serine family amino acid metabolic process; C:integral component of membrane; P:IRE1-mediated unfolded protein response; F:unfolded protein binding; P:regulation of RNA metabolic process; P:intrinsic apoptotic signaling pathway in response to endoplasmic reticulu…	K08852	ERN1; serine/threonine-protein kinase/endoribonuclease IRE1 [EC:2.7.11.1 3.1.26.-]	A 9120 Genetic Information Processing; B 09123 Folding, sorting and degradation; C 04141 Protein processing in endoplasmic reticulum [PATH:ko04141]|A 9140 Cellular Processes; B 09141 Transport and catabolism; C 04140 Autophagy - animal [PATH:ko04140]|A 9140 Cellular Processes; B 09143 Cell growth and death; C 04210 Apoptosis [PATH:ko04210]|A 9160 Human Diseases; B 09164 Neurodegenerative disease;…	552.722	0.350243	0.220408	1.58907	0.112046	0.181261	552.722	0.417605	0.220577	1.89324	0.0583257	0.0988753	552.722	0.0251049	0.219745	0.114245	0.909043	0.961181	584.74	461.81	495.75	580.89	404.58	604.31	420.44	554.75	536.53	573.99	694.66	764.41
Am_Rn_024591	C:GO:0005737; P:GO:0006302; P:GO:0006355; C:GO:0031011	C:cytoplasm; P:double-strand break repair; P:regulation of DNA-templated transcription; C:Ino80 complex	K11672	ACTR5, ARP5, INO80M; actin-related protein 5	None	251.58	-0.241941	0.194611	-1.2432	0.213792	0.311118	251.58	-0.5893	0.193175	-3.0506	0.00228382	0.00564187	251.58	-0.291629	0.194217	-1.50156	0.13321	0.219389	167.17	167.9	171.76	210.85	285.13	284.3	316.26	280.29	389.16	266.43	285.51	271.12
Am_Rn_001296	C:GO:0005887; P:GO:0009306	C:integral component of plasma membrane; P:protein secretion	.	.	.	221.984	-0.379609	0.702346	-0.540487	0.588861	0.697611	221.984	0.719291	0.703914	1.02184	0.306854	0.408492	221.984	1.0877	0.704638	1.54363	0.122679	0.205015	327.02	159.68	146.48	458.58	277.04	356.11	41.17	215.83	282.18	44.03	193.94	170.46
Am_Rn_001297	F:GO:0034061; P:GO:0071897	F:DNA polymerase activity; P:DNA biosynthetic process	K01528	DNM1_3; dynamin 1/3 [EC:3.6.5.5]	A 9130 Environmental Information Processing; B 09132 Signal transduction; C 04072 Phospholipase D signaling pathway [PATH:ko04072]|A 9140 Cellular Processes; B 09141 Transport and catabolism; C 04144 Endocytosis [PATH:ko04144]|A 9150 Organismal Systems; B 09155 Excretory system; C 04961 Endocrine and other factor-regulated calcium reabsorption [PATH:ko04961]|A 9150 Organismal Systems; B 09156 Ner…	373.932	-0.481096	0.240861	-1.9974	0.0457814	0.0839289	373.932	-0.077766	0.241813	-0.321596	0.747758	0.812181	373.932	0.038052	0.241996	0.157242	0.875054	0.936314	332.7	214.68	277.4	467.25	457.94	599.53	315.38	412.21	419.65	296.93	377.23	408.91
Am_Rn_031535	P:GO:0000002; F:GO:0003690; F:GO:0003697; F:GO:0003994; C:GO:0005829; P:GO:0019643; C:GO:0042645; P:GO:0046487; F:GO:0046872; F:GO:0051539	P:mitochondrial genome maintenance; F:double-stranded DNA binding; F:single-stranded DNA binding; F:aconitate hydratase activity; C:cytosol; P:reductive tricarboxylic acid cycle; C:mitochondrial nucleoid; P:glyoxylate metabolic process; F:metal ion binding; F:4 iron, 4 sulfur cluster binding	K01681	ACO, acnA; aconitate hydratase [EC:4.2.1.3]	A 9100 Metabolism; B 09101 Carbohydrate metabolism; C 00020 Citrate cycle (TCA cycle) [PATH:ko00020]|A 9100 Metabolism; B 09101 Carbohydrate metabolism; C 00630 Glyoxylate and dicarboxylate metabolism [PATH:ko00630]|A 9100 Metabolism; B 09102 Energy metabolism; C 00720 Carbon fixation pathways in prokaryotes [PATH:ko00720]	47.629	10.1147	3.171	3.18975	0.00142396	0.00382696	47.629	10.1058	3.171	3.18695	0.00143783	0.00374386	47.629	10.1468	3.171	3.19986	0.00137492	0.00433133	4	32	439	0	0	0	0	0	0	0	0	0
Am_Rn_035233	P:GO:0006869; F:GO:0008289; C:GO:0016021	P:lipid transport; F:lipid binding; C:integral component of membrane	.	.	.	4550.49	-15.2477	1.19848	-12.7226	4.43108e-37	4.14687e-35	4550.49	-15.0491	1.19848	-12.5568	3.64694e-36	5.765e-34	4550.49	-13.1338	1.19858	-10.9578	6.0942e-28	8.0416e-26	0	0	0	8568.07	7223.89	12417	7068.6	8372.36	8738.15	2508.63	2269.94	1767.33
Am_Rn_037470	F:GO:0016874	F:ligase activity	K16280	RGLG; E3 ubiquitin-protein ligase RGLG [EC:2.3.2.27]	None	48.1976	10.0963	2.41974	4.17248	3.01305e-05	0.000114278	48.1976	5.32251	2.14639	2.47975	0.0131475	0.0267019	48.1976	10.1284	2.41974	4.18573	2.84247e-05	0.000139743	30.38	8.45	425.81	0	0	0	5.83	0	8.71	0	0	0
Am_Rn_079187	.	.	K08770	UBC; ubiquitin C	A 9120 Genetic Information Processing; B 09123 Folding, sorting and degradation; C 04120 Ubiquitin mediated proteolysis [PATH:ko04120]|A 9140 Cellular Processes; B 09141 Transport and catabolism; C 04137 Mitophagy - animal [PATH:ko04137]|A 9150 Organismal Systems; B 09152 Endocrine system; C 03320 PPAR signaling pathway [PATH:ko03320]|A 9160 Human Diseases; B 09172 Infectious disease: viral; C 05…	91.52	11.0545	2.07839	5.31876	1.04477e-07	5.92803e-07	91.52	10.0838	2.07839	4.85172	1.22393e-06	6.09247e-06	91.52	10.1247	2.07839	4.87143	1.10792e-06	7.58838e-06	12	129	776	0	0	0	1	0	0	1	0	0
Am_Rn_108402	C:GO:0005758; P:GO:0006118; F:GO:0009055; F:GO:0020037; P:GO:0022900; F:GO:0046872; C:GO:0070469	C:mitochondrial intermembrane space; P:obsolete electron transport; F:electron transfer activity; F:heme binding; P:electron transport chain; F:metal ion binding; C:respirasome	K08738	CYC; cytochrome c	A 9100 Metabolism; B 09102 Energy metabolism; C 00190 Oxidative phosphorylation [PATH:ko00190]|A 9130 Environmental Information Processing; B 09132 Signal transduction; C 02020 Two-component system [PATH:ko02020]|A 9140 Cellular Processes; B 09143 Cell growth and death; C 04210 Apoptosis [PATH:ko04210]|A 9140 Cellular Processes; B 09143 Cell growth and death; C 04214 Apoptosis - fly [PATH:ko04214…	46.7234	10.087	3.09805	3.25592	0.00113024	0.00310038	46.7234	10.0781	3.09805	3.25306	0.00114171	0.00304001	46.7234	10.1191	3.09805	3.26628	0.00108972	0.00353411	6	34	426	0	0	0	0	0	0	0	0	0
Am_Rn_132386	.	.	.	.	.	46.7209	10.087	3.06499	3.29103	0.000998228	0.00277039	46.7209	10.0781	3.06499	3.28813	0.00100856	0.00272015	46.7209	10.119	3.06499	3.30149	0.000961727	0.00316726	9	27	429	0	0	0	0	0	0	0	0	0
Am_Rn_001331	F:GO:0004252; C:GO:0005829; P:GO:0006508; F:GO:0070008; F:GO:0070012	F:serine-type endopeptidase activity; C:cytosol; P:proteolysis; F:serine-type exopeptidase activity; F:oligopeptidase activity	K01322	PREP; prolyl oligopeptidase [EC:3.4.21.26]	A 9150 Organismal Systems; B 09152 Endocrine system; C 04614 Renin-angiotensin system [PATH:ko04614]	302.905	-0.757441	0.571657	-1.32499	0.185174	0.276068	302.905	-0.881175	0.571532	-1.54178	0.123128	0.188912	302.905	-0.576503	0.571833	-1.00817	0.313374	0.437767	225.53	45.85	208.02	320.09	338.94	442.5	353.39	432.5	398.51	257.03	504.7	218.49
Am_Rn_033068	C:GO:0005802; C:GO:0005886; P:GO:0005982; P:GO:0005985; P:GO:0006011; P:GO:0009833; C:GO:0016021; F:GO:0016760; P:GO:0030244; P:GO:0071555	C:trans-Golgi network; C:plasma membrane; P:starch metabolic process; P:sucrose metabolic process; P:UDP-glucose metabolic process; P:plant-type primary cell wall biogenesis; C:integral component of membrane; F:cellulose synthase (UDP-forming) activity; P:cellulose biosynthetic process; P:cell wall organization	.	.	.	967.931	-11.6853	1.32777	-8.80068	1.35985e-18	2.98902e-17	967.931	-12.3752	1.32765	-9.32117	1.15064e-20	4.37717e-19	967.931	-13.1021	1.32756	-9.86932	5.65466e-23	4.55076e-21	0	0	0	740.99	1008.12	564.91	808.02	1334.11	1730.17	828.25	4126.91	1443.6
Am_Rn_122771	.	.	.	.	.	46.6698	10.0853	3.51062	2.8728	0.00406853	0.00984664	46.6698	10.0764	3.51062	2.87027	0.00410124	0.00951809	46.6698	10.1174	3.51062	2.88194	0.00395241	0.0109755	1	13	450	0	0	0	0	0	0	0	0	0
Am_Rn_001337	F:GO:0000166; F:GO:0004386; P:GO:0006259; P:GO:0006974; P:GO:0051276	F:nucleotide binding; F:helicase activity; P:DNA metabolic process; P:cellular response to DNA damage stimulus; P:chromosome organization	.	.	.	210.688	3.02294	0.700538	4.31517	NA	NA	210.688	2.89352	0.700009	4.13355	NA	NA	210.688	1.95998	0.696915	2.81237	NA	NA	963.27	175.14	158.24	59.84	88.42	70.98	84.81	80.61	70.03	182.58	176.93	106.66
Am_Rn_001346	P:GO:0000290; C:GO:0000932; F:GO:0008047; P:GO:0031087; P:GO:0043085	P:deadenylation-dependent decapping of nuclear-transcribed mRNA; C:P-body; F:enzyme activator activity; P:deadenylation-independent decapping of nuclear-transcribed mRNA; P:positive regulation of catalytic activity	K12611	DCP1B; mRNA-decapping enzyme 1B [EC:3.-.-.-]	A 9120 Genetic Information Processing; B 09123 Folding, sorting and degradation; C 03018 RNA degradation [PATH:ko03018]	131.136	-0.453641	1.04499	-0.434111	0.664208	0.763942	131.136	0.0933801	1.04632	0.0892463	0.928886	0.956007	131.136	-1.67157	1.04336	-1.6021	0.109132	0.186214	27.59	176.82	8.54	100	140.16	114.4	3.9	146.41	106.69	227.72	284.89	334.66
Am_Rn_114168	.	.	.	.	.	46.3989	10.0771	1.67832	6.0043	1.92165e-09	1.40898e-08	46.3989	10.0683	1.67832	5.999	1.98535e-09	1.64909e-08	46.3989	10.1092	1.67832	6.02341	1.70784e-09	2.04369e-08	144	188	131	0	0	0	0	0	0	0	0	0
Am_Rn_001350	.	.	.	.	.	553.06	0.549289	0.270423	2.03122	0.0422325	0.0783123	553.06	-0.0617569	0.269365	-0.229269	0.81866	0.870413	553.06	-0.242457	0.269063	-0.901116	0.367527	0.496533	437.81	392	565.44	321.13	444.23	485.1	426.75	760	732.85	634.29	623	951
Am_Rn_001356	F:GO:0005198; C:GO:0005829; P:GO:0006886; P:GO:0006898; C:GO:0009506; C:GO:0009507; C:GO:0030130; C:GO:0030132; F:GO:0032051; C:GO:0071439	F:structural molecule activity; C:cytosol; P:intracellular protein transport; P:receptor-mediated endocytosis; C:plasmodesma; C:chloroplast; C:clathrin coat of trans-Golgi network vesicle; C:clathrin coat of coated pit; F:clathrin light chain binding; C:clathrin complex	K04646	CLTC; clathrin heavy chain	A 9140 Cellular Processes; B 09141 Transport and catabolism; C 04144 Endocytosis [PATH:ko04144]|A 9140 Cellular Processes; B 09141 Transport and catabolism; C 04142 Lysosome [PATH:ko04142]|A 9150 Organismal Systems; B 09155 Excretory system; C 04961 Endocrine and other factor-regulated calcium reabsorption [PATH:ko04961]|A 9150 Organismal Systems; B 09156 Nervous system; C 04721 Synaptic vesicle …	475.307	0.386108	0.317579	1.21579	0.224067	0.323646	475.307	0.268504	0.317417	0.845901	0.397608	0.505737	475.307	0.584571	0.317852	1.83913	0.0658963	0.122005	371.81	718.06	384.41	313.74	556.52	574.35	372.84	624.39	569.91	373.66	531.98	368.22
Am_Rn_044345	P:GO:0009805; P:GO:0009809; P:GO:0009811; F:GO:0016616; F:GO:0016621	P:coumarin biosynthetic process; P:lignin biosynthetic process; P:stilbene biosynthetic process; F:oxidoreductase activity, acting on the CH-OH group of donors, NAD or NADP as acceptor; F:cinnamoyl-CoA reductase activity	.	.	.	1502.03	-13.8452	1.21935	-11.3546	7.03626e-30	4.08116e-28	1502.03	-11.9584	1.21957	-9.80539	1.06732e-22	5.1442e-21	1502.03	-13.0191	1.21941	-10.6766	1.31019e-26	1.50512e-24	0	0	0	3779.3	2771.33	4008.84	1081.97	994.15	691.25	2136.01	2266.03	1645.01
Am_Rn_088827	.	.	.	.	.	46.7775	10.0597	2.04016	4.93084	8.18773e-07	4.04402e-06	46.7775	5.63033	1.71802	3.27722	0.00104834	0.00281276	46.7775	10.0918	2.04016	4.94656	7.55364e-07	5.39041e-06	190.27	243.95	24.42	0	0	0	7.47	4	0	0	0	0
Am_Rn_001392	C:GO:0005887; P:GO:0009306	C:integral component of plasma membrane; P:protein secretion	.	.	.	653.686	-0.915939	0.446588	-2.05097	0.04027	0.0751619	653.686	0.564163	0.447806	1.25984	0.207728	0.294688	653.686	0.00562583	0.447158	0.0125813	0.989962	1	422.55	504.64	497.94	1191.06	986.49	1311.01	119.84	542.86	639.76	525.15	545.03	814.54
Am_Rn_001394	P:GO:0009451; C:GO:0016021	P:RNA modification; C:integral component of membrane	.	.	.	184.373	-2.60171	1.86692	-1.39359	0.163442	0.249272	184.373	-2.28094	1.86704	-1.22169	0.221826	0.311511	184.373	1.50896	1.87447	0.805005	0.420817	0.550626	0	149.97	12.59	384.51	415.66	361.69	158.51	541.3	252.25	67.53	0	0
Am_Rn_095602	C:GO:0005886; C:GO:0016021	C:plasma membrane; C:integral component of membrane	.	.	.	45.8265	10.0591	3.07471	3.27155	0.00106961	0.00294796	45.8265	10.0502	3.07471	3.26866	0.0010806	0.00289116	45.8265	10.0911	3.07471	3.28198	0.00103082	0.00336535	7	34	416	0	0	0	0	0	0	0	0	0
Am_Rn_067777	F:GO:0003676	F:nucleic acid binding	.	.	.	46.088	10.0535	1.94382	5.17206	2.31525e-07	1.25143e-06	46.088	6.76125	1.66713	4.05562	5.00009e-05	0.000181044	46.088	10.0856	1.94382	5.18856	2.11924e-07	1.6879e-06	245.7	40.34	145.02	0	0	0	4.47	0	1.23	0	0	0
Am_Rn_052126	C:GO:0009535; C:GO:0009941; C:GO:0016021	C:chloroplast thylakoid membrane; C:chloroplast envelope; C:integral component of membrane	.	.	.	213.852	-0.949794	0.260675	-3.6436	0.000268855	0.000846055	213.852	-0.592881	0.261866	-2.26406	0.0235705	0.0446931	213.852	6.10172e-05	0.264279	0.000230882	0.999816	1	137	112	137.89	278.52	300.61	405.16	209.88	239.06	316.32	143.85	139.97	235.48
Am_Rn_073695	.	.	.	.	.	88.6842	11.0104	2.42381	4.54259	5.55666e-06	2.38772e-05	88.6842	11.0015	2.42381	4.53893	5.65414e-06	2.48062e-05	88.6842	10.0807	2.42381	4.15901	3.19623e-05	0.000155197	13	47.98	820.66	0	0	0	0	0	0	0	1	0
Am_Rn_001421	F:GO:0034061; P:GO:0071897	F:DNA polymerase activity; P:DNA biosynthetic process	K01528	DNM1_3; dynamin 1/3 [EC:3.6.5.5]	A 9130 Environmental Information Processing; B 09132 Signal transduction; C 04072 Phospholipase D signaling pathway [PATH:ko04072]|A 9140 Cellular Processes; B 09141 Transport and catabolism; C 04144 Endocytosis [PATH:ko04144]|A 9150 Organismal Systems; B 09155 Excretory system; C 04961 Endocrine and other factor-regulated calcium reabsorption [PATH:ko04961]|A 9150 Organismal Systems; B 09156 Ner…	350.244	-0.803529	0.463272	-1.73447	0.0828355	0.139912	350.244	-0.0604223	0.46429	-0.130139	0.896456	0.932015	350.244	-0.461223	0.463622	-0.994826	0.319821	0.445139	308.06	255.4	102.09	587.4	438.42	487.18	138.63	376.39	422.09	359.49	445.4	423.07
Am_Rn_105189	F:GO:0004843; P:GO:0016579; P:GO:0030433	F:cysteine-type deubiquitinase activity; P:protein deubiquitination; P:ubiquitin-dependent ERAD pathway	K13719	OTU1, YOD1; ubiquitin thioesterase OTU1 [EC:3.1.2.-]	A 9120 Genetic Information Processing; B 09123 Folding, sorting and degradation; C 04141 Protein processing in endoplasmic reticulum [PATH:ko04141]	213.224	-0.183204	0.194844	-0.940259	0.347085	0.462916	213.224	-0.593268	0.192971	-3.07438	0.00210937	0.00526377	213.224	0.250884	0.19729	1.27165	0.203497	0.310368	158.11	152.07	159.61	217.77	194.14	287.45	303.33	315.09	293.27	174.82	185.76	163.08
Am_Rn_090182	C:GO:0016020; F:GO:0045735	C:membrane; F:nutrient reservoir activity	.	.	.	17748	-11.6984	3.562	-3.28423	0.0010226	0.00283134	17748	-13.4361	3.56199	-3.77207	0.000161897	0.000525011	17748	-12.7954	3.56199	-3.5922	0.000327892	0.00122798	0	9	0	0	24772.5	10279.4	0	63849	61374	1	72697.8	3420.55
Am_Rn_001432	C:GO:0000151; C:GO:0005737; F:GO:0008270; P:GO:0016567; F:GO:0016874; F:GO:0061630; P:GO:0071596	C:ubiquitin ligase complex; C:cytoplasm; F:zinc ion binding; P:protein ubiquitination; F:ligase activity; F:ubiquitin protein ligase activity; P:ubiquitin-dependent protein catabolic process via the N-end rule pathway	.	.	.	1809.01	0.0786005	0.227873	0.344932	0.730145	0.821235	1809.01	0.462759	0.228112	2.02865	0.0424936	0.0749333	1809.01	0.0556915	0.227842	0.24443	0.806898	0.888031	1422.77	1949.68	1599.9	1904.88	1953.46	2209.61	876.74	1836.35	2032.87	1788.23	2176.11	2337.83
Am_Rn_066334	F:GO:0000977; F:GO:0003700; C:GO:0005634; C:GO:0005667; P:GO:0006355; P:GO:0045944; F:GO:0046983	F:RNA polymerase II transcription regulatory region sequence-specific DNA binding; F:DNA-binding transcription factor activity; C:nucleus; C:transcription regulator complex; P:regulation of DNA-templated transcription; P:positive regulation of transcription by RNA polymerase II; F:protein dimerization activity	K09264	K09264; MADS-box transcription factor, plant	None	950.24	-21.5575	3.61007	-5.97148	2.3511e-09	1.70096e-08	950.24	-26.3216	3.60943	-7.29246	3.04351e-13	4.49005e-12	950.24	-12.7812	3.79675	-3.36636	0.000761665	0.00258184	0	0	0	0	411.81	0	4045.38	4264.95	3250.76	0	1	0
Am_Rn_045194	F:GO:0004553; P:GO:0005975; C:GO:0016021; C:GO:0046658	F:hydrolase activity, hydrolyzing O-glycosyl compounds; P:carbohydrate metabolic process; C:integral component of membrane; C:anchored component of plasma membrane	K19891	GN1_2_3; glucan endo-1,3-beta-glucosidase 1/2/3 [EC:3.2.1.39]	A 9100 Metabolism; B 09101 Carbohydrate metabolism; C 00500 Starch and sucrose metabolism [PATH:ko00500]	77.9643	-0.519089	0.237961	-2.1814	0.0291537	0.0566782	77.9643	-0.594537	0.237272	-2.50572	0.0122203	0.0250389	77.9643	-0.218694	0.241103	-0.907057	0.364376	0.49311	41	53.47	57.72	91.98	83.52	105.5	88	106.8	99.74	88.75	74.15	69.55
Am_Rn_040478	F:GO:0005524	F:ATP binding	K03283	HSPA1s; heat shock 70kDa protein 1/2/6/8	A 9120 Genetic Information Processing; B 09121 Transcription; C 03040 Spliceosome [PATH:ko03040]|A 9120 Genetic Information Processing; B 09123 Folding, sorting and degradation; C 04141 Protein processing in endoplasmic reticulum [PATH:ko04141]|A 9130 Environmental Information Processing; B 09132 Signal transduction; C 04010 MAPK signaling pathway [PATH:ko04010]|A 9140 Cellular Processes; B 09141…	45.427	10.0466	2.24348	4.47812	7.53041e-06	3.16541e-05	45.427	10.0377	2.24348	4.47416	7.67133e-06	3.28345e-05	45.427	10.0787	2.24348	4.49241	7.04203e-06	4.02201e-05	58.7	132.94	264.98	0	0	0	0	0	0	0	0	0
Am_Rn_091524	F:GO:0003723; F:GO:0003735; P:GO:0006412; C:GO:0015935; P:GO:0042254	F:RNA binding; F:structural constituent of ribosome; P:translation; C:small ribosomal subunit; P:ribosome biogenesis	K02989	RP-S5e, RPS5; small subunit ribosomal protein S5e	A 9120 Genetic Information Processing; B 09122 Translation; C 03010 Ribosome [PATH:ko03010]|A 9160 Human Diseases; B 09172 Infectious disease: viral; C 05171 Coronavirus disease - COVID-19 [PATH:ko05171]	45.3636	10.0445	2.14851	4.6751	2.93812e-06	1.32426e-05	45.3636	10.0356	2.14851	4.67096	2.99791e-06	1.38791e-05	45.3636	10.0766	2.14851	4.69003	2.73169e-06	1.71537e-05	92	102	256	0	0	0	0	0	0	0	0	0
Am_Rn_063337	.	.	.	.	.	118.542	11.1929	4.2473	2.63529	0.00840651	0.018799	118.542	3.37897	4.08277	0.827617	0.407887	0.516315	118.542	3.59819	4.08303	0.881255	0.37818	0.507895	622.53	342.26	0	0	0	0	106.82	0	0	107.34	0	0
Am_Rn_001456	P:GO:0000209; F:GO:0004839; P:GO:0006511; F:GO:0016746; P:GO:0031396; F:GO:0061631	P:protein polyubiquitination; F:ubiquitin activating enzyme activity; P:ubiquitin-dependent protein catabolic process; F:acyltransferase activity; P:regulation of protein ubiquitination; F:ubiquitin conjugating enzyme activity	K10588	UBE3B; ubiquitin-protein ligase E3 B [EC:2.3.2.26]	A 9120 Genetic Information Processing; B 09123 Folding, sorting and degradation; C 04120 Ubiquitin mediated proteolysis [PATH:ko04120]	355.947	-0.411679	0.349903	-1.17655	0.239375	0.341873	355.947	-0.555614	0.349683	-1.58891	0.112081	0.174224	355.947	-0.423915	0.34982	-1.21181	0.225585	0.337256	167.5	373.87	162.22	359.95	400.47	425.45	356.31	392.54	566.88	256.08	468.98	500.1
Am_Rn_001468	F:GO:0005337; C:GO:0005886; C:GO:0016021; P:GO:1901642	F:nucleoside transmembrane transporter activity; C:plasma membrane; C:integral component of membrane; P:nucleoside transmembrane transport	K15014	SLC29A1_2_3, ENT1_2_3; solute carrier family 29 (equilibrative nucleoside transporter), member 1/2/3	A 9160 Human Diseases; B 09165 Substance dependence; C 05034 Alcoholism [PATH:ko05034]	243.281	-0.669616	0.806311	-0.830469	0.406273	0.524723	243.281	-0.565237	0.806418	-0.700924	0.483351	0.586018	243.281	0.313284	0.807487	0.387974	0.698035	0.801703	79.96	311.53	124.04	459.98	93.06	483.91	259.6	279.38	415.52	96.42	45.27	396.56
Am_Rn_081480	C:GO:0000123; F:GO:0003677; C:GO:0016020	C:histone acetyltransferase complex; F:DNA binding; C:membrane	.	.	.	133.359	0.309883	0.253005	1.22481	0.220646	0.319811	133.359	-0.594944	0.247385	-2.40493	0.0161756	0.0320601	133.359	0.475676	0.254148	1.87165	0.0612549	0.114629	93.79	107.54	125.92	91.87	134.11	116.02	218.7	182.07	232.71	92.49	113.36	107.43
Am_Rn_001484	C:GO:0000785; C:GO:0005634; P:GO:0006355; F:GO:0008270; P:GO:0034968; F:GO:0046975	C:chromatin; C:nucleus; P:regulation of DNA-templated transcription; F:zinc ion binding; P:histone lysine methylation; F:histone methyltransferase activity (H3-K36 specific)	.	.	.	815.583	0.167141	0.245157	0.681771	0.495384	0.61125	815.583	0.206697	0.245217	0.842915	0.399276	0.507373	815.583	0.258189	0.245221	1.05288	0.292395	0.414828	690.57	829.09	738.26	899.39	855.32	830.25	497.34	1052.47	1025.67	657.37	868.35	974.96
Am_Rn_086699	.	.	.	.	.	98.8041	4.82845	0.807316	5.98087	2.21954e-09	1.61267e-08	98.8041	3.47056	0.787323	4.40805	1.04305e-05	4.34495e-05	98.8041	10.0668	1.40952	7.14196	9.20106e-13	1.92801e-11	228	130	501	7	4	31	25	31	47	0	0	1
Am_Rn_101931	C:GO:0016020	C:membrane	.	.	.	45.1147	10.0334	2.66395	3.76637	0.00016564	0.000544852	45.1147	9.06274	2.66395	3.40199	0.000668965	0.00188557	45.1147	10.0655	2.66395	3.77841	0.000157834	0.000645033	374	4	30	0	0	0	1	0	0	0	0	0
Am_Rn_083481	.	.	.	.	.	44.7066	10.0232	4.24761	2.35972	0.0182887	0.037546	44.7066	10.0143	4.24761	2.35763	0.0183921	0.0359166	44.7066	10.0552	4.24761	2.36727	0.0179198	0.0404425	0	37.97	409.34	0	0	0	0	0	0	0	0	0
Am_Rn_116660	.	.	.	.	.	43.678	9.98958	4.24762	2.35181	0.0186825	0.0382436	43.678	9.9807	4.24762	2.34972	0.0187878	0.0366068	43.678	10.0217	4.24762	2.35936	0.0183066	0.0411957	0	19	416	0	0	0	0	0	0	0	0	0
Am_Rn_061491	.	.	.	.	.	317.42	12.8499	1.50478	8.53937	1.34952e-17	2.69277e-16	317.42	12.841	1.50478	8.53347	1.42024e-17	3.77441e-16	317.42	10.0202	1.18139	8.48175	2.21825e-17	9.16524e-16	1564	366.24	1087.37	0	0	0	0	0	0	2.84	0	1.29
Am_Rn_001531	.	.	.	.	.	239.598	0.735031	0.475462	1.54593	0.122122	0.194732	239.598	0.226023	0.47424	0.476601	0.633646	0.715917	239.598	-0.104808	0.473551	-0.221324	0.82484	0.899921	265.57	301.02	107.48	131.03	187.7	208.9	125.16	305.46	335.69	193.58	342.28	427.57
Am_Rn_086629	F:GO:0004866; P:GO:0010466; C:GO:0016020	F:endopeptidase inhibitor activity; P:negative regulation of peptidase activity; C:membrane	.	.	.	620.634	11.3459	1.26019	9.00327	2.19099e-19	5.22634e-18	620.634	5.48703	0.951419	5.76721	8.0595e-09	6.02961e-08	620.634	9.98408	1.07599	9.27894	1.71172e-20	1.08301e-18	854.84	525.22	4594.44	0	2	1	38.41	56.64	82.23	0	1	7
Am_Rn_001548	C:GO:0016021; P:GO:0016567; F:GO:0016874; F:GO:0061630	C:integral component of membrane; P:protein ubiquitination; F:ligase activity; F:ubiquitin protein ligase activity	.	.	.	593.708	-0.799092	0.57596	-1.38741	0.165317	0.251491	593.708	-0.431327	0.576168	-0.748614	0.45409	0.560425	593.708	0.051217	0.576483	0.0888439	0.929206	0.974899	134.44	782.87	308.18	715.11	816.58	1126.54	252.03	987.44	868.45	584.29	531.26	368.09
Am_Rn_001553	F:GO:0003677; F:GO:0005524; C:GO:0005634; F:GO:0008094	F:DNA binding; F:ATP binding; C:nucleus; F:ATP-dependent activity, acting on DNA	K15192	BTAF1, MOT1; TATA-binding protein-associated factor [EC:3.6.4.-]	None	810.306	-0.215318	0.319184	-0.674589	0.499937	0.615643	810.306	0.358798	0.319721	1.12222	0.261768	0.35735	810.306	-0.0258989	0.319304	-0.0811103	0.935354	0.979456	675.21	759.29	598.1	1017.96	957.84	1077.05	321.79	877.34	911.65	718.15	855.66	1176.34
Am_Rn_061459	F:GO:0003723; F:GO:0004525; P:GO:0006396; P:GO:0051252; P:GO:0090502	F:RNA binding; F:ribonuclease III activity; P:RNA processing; P:regulation of RNA metabolic process; P:RNA phosphodiester bond hydrolysis, endonucleolytic	.	.	.	354.008	-0.766261	0.257865	-2.97156	0.0029629	0.00740133	354.008	-0.596658	0.258261	-2.31029	0.0208719	0.0401766	354.008	-0.521113	0.258325	-2.01727	0.043667	0.0862389	182.4	304.75	143.61	362.3	486.1	529.62	360.69	404.93	449.41	327.45	435.54	420.22
Am_Rn_023296	F:GO:0004674; F:GO:0005524; P:GO:0006468; P:GO:0009069	F:protein serine/threonine kinase activity; F:ATP binding; P:protein phosphorylation; P:serine family amino acid metabolic process	.	.	.	83.9996	1.52535	0.888923	1.71596	0.0861696	0.144854	83.9996	9.80083	1.4716	6.65996	2.73897e-11	3.06889e-10	83.9996	0.266214	0.884869	0.300852	0.763528	0.854705	30.09	50.58	302.86	66.73	61.31	40.8	0	0	0	178.63	138.5	102.27
Am_Rn_081483	F:GO:0005509	F:calcium ion binding	.	.	.	43.0644	5.73711	1.1012	5.20988	1.88964e-07	1.03262e-06	43.0644	9.93429	1.54776	6.41849	1.37632e-10	1.37853e-09	43.0644	9.97525	1.54776	6.44495	1.15635e-10	1.69371e-09	66.72	303.94	69.69	4.81	2.75	2.31	0	0	0	0	0	0
Am_Rn_045954	.	.	.	.	.	41.8052	9.92336	2.11031	4.70232	2.57222e-06	1.17093e-05	41.8052	8.95268	2.11031	4.24235	2.21191e-05	8.63067e-05	41.8052	9.95543	2.11031	4.71752	2.38738e-06	1.51837e-05	178.19	18.97	200.21	0	0	0	1	0	0	0	0	0
Am_Rn_001578	.	.	.	.	.	607.961	0.189839	0.551496	0.344225	0.730677	0.821591	607.961	0.642851	0.55186	1.16488	0.244067	0.337285	607.961	0.0877401	0.551409	0.15912	0.873574	0.935355	669.86	823.08	259.48	644.05	667.52	662.62	131.31	640.57	743.47	593.09	657.42	933
Am_Rn_001589	F:GO:0003729; C:GO:0005634; P:GO:0006397; C:GO:1990904	F:mRNA binding; C:nucleus; P:mRNA processing; C:ribonucleoprotein complex	K12741	HNRNPA1_3; heterogeneous nuclear ribonucleoprotein A1/A3	A 9120 Genetic Information Processing; B 09121 Transcription; C 03040 Spliceosome [PATH:ko03040]|A 9160 Human Diseases; B 09164 Neurodegenerative disease; C 05014 Amyotrophic lateral sclerosis [PATH:ko05014]	215.195	-0.672735	0.652115	-1.03162	0.30225	0.414349	215.195	0.0900736	0.653401	0.137853	0.890356	0.927665	215.195	-0.536713	0.652245	-0.82287	0.410582	0.540566	164.16	209.26	57.6	271.68	355.31	248.14	35.35	216.3	299.28	203.74	324.53	295.29
Am_Rn_100423	F:GO:0003723; F:GO:0003735; C:GO:0005840; P:GO:0006412; P:GO:0042254	F:RNA binding; F:structural constituent of ribosome; C:ribosome; P:translation; P:ribosome biogenesis	K02964	RP-S18e, RPS18; small subunit ribosomal protein S18e	A 9120 Genetic Information Processing; B 09122 Translation; C 03010 Ribosome [PATH:ko03010]|A 9160 Human Diseases; B 09172 Infectious disease: viral; C 05171 Coronavirus disease - COVID-19 [PATH:ko05171]	41.1698	9.90136	2.69982	3.66742	0.000245011	0.000777516	41.1698	8.93068	2.69982	3.30788	0.000940035	0.00255634	41.1698	9.93344	2.69982	3.6793	0.000233876	0.000912635	4	21	384	0	0	0	1	0	0	0	0	0
Am_Rn_001595	C:GO:0000148; F:GO:0003843; P:GO:0005982; P:GO:0005985; P:GO:0006075; C:GO:0016021	C:1,3-beta-D-glucan synthase complex; F:1,3-beta-D-glucan synthase activity; P:starch metabolic process; P:sucrose metabolic process; P:(1->3)-beta-D-glucan biosynthetic process; C:integral component of membrane	K11000	CALS; callose synthase [EC:2.4.1.-]	None	1012.02	0.0490293	0.448668	0.109277	0.912982	0.96555	1012.02	0.776329	0.449145	1.72846	0.0839054	0.135773	1012.02	-0.374932	0.448473	-0.836019	0.403144	0.533241	553.72	1520.08	621.22	778.51	1232.54	1278.14	265.71	777.68	1005.09	1288.34	1502.91	1700.08
Am_Rn_028799	P:GO:0006004; C:GO:0016021; F:GO:0016757	P:fucose metabolic process; C:integral component of membrane; F:glycosyltransferase activity	.	.	.	91.8554	-0.148466	0.26905	-0.551815	0.581075	0.69064	91.8554	-0.599191	0.26544	-2.25735	0.0239863	0.0453828	91.8554	0.0257958	0.270435	0.0953863	0.924008	0.971185	81.14	62.7	52.15	101.32	87.86	94.04	109.35	132.47	146.97	77.86	93.54	85.21
Am_Rn_029437	.	.	K14026	SEL1, SEL1L; SEL1 protein	A 9120 Genetic Information Processing; B 09123 Folding, sorting and degradation; C 04141 Protein processing in endoplasmic reticulum [PATH:ko04141]	758.507	-0.0694131	0.206698	-0.335819	0.737007	0.827337	758.507	-0.600384	0.20601	-2.91434	0.00356444	0.00841049	758.507	-0.0526848	0.206668	-0.254925	0.798781	0.882301	559.42	613.67	461.66	611.54	767.01	854.67	738.66	1343.52	1157.85	645	778.33	825.71
Am_Rn_025070	.	.	.	.	.	87.6994	0.0960326	2.71132	0.0354191	0.971746	1	87.6994	2.26046	2.71408	0.832865	0.404921	0.513203	87.6994	9.92707	2.95543	3.35893	0.000782452	0.00264495	224.79	7.9	149.59	400.27	0	72.94	0	112.58	0	0	0	0
Am_Rn_074537	F:GO:0003735; C:GO:0005840; P:GO:0006412; P:GO:0042254	F:structural constituent of ribosome; C:ribosome; P:translation; P:ribosome biogenesis	K02925	RP-L3e, RPL3; large subunit ribosomal protein L3e	A 9120 Genetic Information Processing; B 09122 Translation; C 03010 Ribosome [PATH:ko03010]|A 9160 Human Diseases; B 09172 Infectious disease: viral; C 05171 Coronavirus disease - COVID-19 [PATH:ko05171]	39.9619	9.8616	2.22118	4.43981	9.00383e-06	3.73332e-05	39.9619	9.85271	2.22118	4.43581	9.17269e-06	3.86533e-05	39.9619	9.89367	2.22118	4.45425	8.41869e-06	4.70105e-05	87	92	217	0	0	0	0	0	0	0	0	0
Am_Rn_071235	F:GO:0016787	F:hydrolase activity	.	.	.	2230.21	-14.8971	1.41157	-10.5536	4.88808e-26	2.10934e-24	2230.21	-11.3283	1.41194	-8.02319	1.03031e-15	2.15891e-14	2230.21	-12.774	1.41168	-9.04877	1.44592e-19	8.17697e-18	0	0	0	8731.53	5751.35	7232.9	416.21	492.76	968.7	764.89	3899.82	397.44
Am_Rn_001620	P:GO:0000027; F:GO:0005524; C:GO:0005634; C:GO:0016021; F:GO:0016887	P:ribosomal large subunit assembly; F:ATP binding; C:nucleus; C:integral component of membrane; F:ATP hydrolysis activity	K14572	MDN1, REA1; midasin	A 9120 Genetic Information Processing; B 09122 Translation; C 03008 Ribosome biogenesis in eukaryotes [PATH:ko03008]	381.352	-0.485285	0.449743	-1.07903	0.280575	0.389927	381.352	0.766188	0.451667	1.69635	0.0898187	0.14397	381.352	-0.112101	0.450105	-0.249055	0.803318	0.885542	350.16	407.89	173.69	549.89	557.9	575.26	91.31	348.44	292.47	345.68	416.53	573.97
Am_Rn_069593	F:GO:0004601; C:GO:0005576; P:GO:0006804; P:GO:0006979; C:GO:0016021; F:GO:0020037; P:GO:0042744; F:GO:0046872; P:GO:0098869	F:peroxidase activity; C:extracellular region; P:obsolete peroxidase reaction; P:response to oxidative stress; C:integral component of membrane; F:heme binding; P:hydrogen peroxide catabolic process; F:metal ion binding; P:cellular oxidant detoxification	K00430	E1.11.1.7; peroxidase [EC:1.11.1.7]	A 9100 Metabolism; B 09110 Biosynthesis of other secondary metabolites; C 00940 Phenylpropanoid biosynthesis [PATH:ko00940]	42.1714	9.83554	1.51393	6.49668	8.21111e-11	7.32493e-10	42.1714	3.7357	0.979794	3.81274	0.000137435	0.000453394	42.1714	9.86761	1.51393	6.51787	7.1314e-11	1.08411e-09	63.76	228.33	111.6	0	0	0	7	24.58	5.66	0	0	0
Am_Rn_091014	.	.	.	.	.	39.235	9.835	3.30386	2.97682	0.00291257	0.00729435	39.235	9.82611	3.30386	2.97413	0.00293823	0.00707628	39.235	9.86707	3.30386	2.98653	0.00282167	0.00816699	3.1	22.86	365.24	0	0	0	0	0	0	0	0	0
Am_Rn_001640	F:GO:0003712; C:GO:0005667; P:GO:0006355; P:GO:0006357; C:GO:0016592	F:transcription coregulator activity; C:transcription regulator complex; P:regulation of DNA-templated transcription; P:regulation of transcription by RNA polymerase II; C:mediator complex	K15164	MED13; mediator of RNA polymerase II transcription subunit 13	A 9150 Organismal Systems; B 09152 Endocrine system; C 04919 Thyroid hormone signaling pathway [PATH:ko04919]	786.851	-0.375937	0.50466	-0.744931	0.456313	0.574137	786.851	0.217906	0.505008	0.43149	0.666112	0.743539	786.851	-0.103758	0.504778	-0.205551	0.837141	0.90854	784.88	530.9	497.4	1016.09	988.58	1094.84	208.01	949.9	984.12	493.71	1067.17	1073.56
Am_Rn_039396	P:GO:0006952; P:GO:0007157; P:GO:0017148; F:GO:0030246; F:GO:0030598; P:GO:0044533; F:GO:0090729	P:defense response; P:heterophilic cell-cell adhesion via plasma membrane cell adhesion molecules; P:negative regulation of translation; F:carbohydrate binding; F:rRNA N-glycosylase activity; P:positive regulation of apoptotic process in another organism; F:toxin activity	.	.	.	7769.11	-15.0558	1.23097	-12.2308	2.12761e-34	1.6559e-32	7769.11	-16.5927	1.23095	-13.4796	2.06102e-41	5.46779e-39	7769.11	-12.7227	1.2311	-10.3343	4.92797e-25	5.01249e-23	0	0	0	9902.95	7001.57	7200.43	16473.3	28027.6	26893.2	2118.32	1774.68	1013.69
Am_Rn_001645	.	.	.	.	.	426.726	-0.382958	0.252955	-1.51394	0.130042	0.205472	426.726	-0.170507	0.253398	-0.67288	0.501024	0.602441	426.726	-0.189718	0.253258	-0.749109	0.453792	0.582977	216	344	376	458	531	581	274	552	548	447	513	438
Am_Rn_088772	P:GO:0015671; F:GO:0019825; F:GO:0020037	P:oxygen transport; F:oxygen binding; F:heme binding	.	.	.	214.342	7.46692	0.876949	8.51465	1.67091e-17	3.29953e-16	214.342	5.95244	0.824909	7.21587	5.35908e-13	7.70501e-12	214.342	9.8493	1.15296	8.5426	1.31234e-17	5.60406e-16	157.3	1253.9	769.6	1	2.54	12	11	12	21	1	0	2
Am_Rn_014494	F:GO:0004693; F:GO:0005524; C:GO:0005634; P:GO:0006468; P:GO:0009069; P:GO:0051726; P:GO:0051726	F:cyclin-dependent protein serine/threonine kinase activity; F:ATP binding; C:nucleus; P:protein phosphorylation; P:serine family amino acid metabolic process; P:regulation of cell cycle; P:regulation of cell cycle	.	.	.	82.3425	-0.161604	1.35822	-0.118982	0.90529	0.95971	82.3425	5.39718	1.4214	3.7971	0.000146399	0.000479907	82.3425	9.8376	1.79682	5.47502	4.37458e-08	4.01218e-07	217.86	45.94	98.7	141.55	120.14	307.96	0	11.98	0	0	0	0
Am_Rn_020284	C:GO:0016021; F:GO:0016740	C:integral component of membrane; F:transferase activity	.	.	.	487.401	13.4682	3.4227	3.93495	8.32128e-05	0.000289645	487.401	13.4593	3.4227	3.93236	8.41168e-05	0.000289914	487.401	9.81618	3.25897	3.01205	0.00259489	0.0075954	2906.17	905.64	799.74	0	0	0	0	0	0	0	6.76	0
Am_Rn_001661	F:GO:0004672; F:GO:0005524; P:GO:0006468	F:protein kinase activity; F:ATP binding; P:protein phosphorylation	.	.	.	218.545	1.65471	1.28272	1.29	0.19705	0.290622	218.545	2.52981	1.28421	1.96993	0.0488463	0.0847072	218.545	1.21441	1.28223	0.947111	0.343582	0.471292	0	402.06	763.93	200.63	83.78	180.59	30.85	93.98	139.44	311.74	119.59	211.02
Am_Rn_001662	F:GO:0003677; F:GO:0005516; P:GO:0007165; F:GO:0016787; F:GO:0043531	F:DNA binding; F:calmodulin binding; P:signal transduction; F:hydrolase activity; F:ADP binding	.	.	.	153.453	1.27297	1.02923	1.23682	0.216154	0.31412	153.453	1.75691	1.03117	1.7038	0.088418	0.142073	153.453	-1.07158	1.02539	-1.04505	0.296001	0.418912	20.16	210.18	186.78	127.08	57.81	20.07	10.63	66.67	82.95	787.75	101.18	213.38
Am_Rn_050807	.	.	.	.	.	37.7818	9.78035	4.24771	2.3025	0.0213071	0.0429733	37.7818	9.77146	4.24771	2.30041	0.0214252	0.0410952	37.7818	9.81242	4.24771	2.31005	0.0208854	0.046147	102.62	0	261.29	0	0	0	0	0	0	0	0	0
Am_Rn_045316	F:GO:0005524	F:ATP binding	K03283	HSPA1s; heat shock 70kDa protein 1/2/6/8	A 9120 Genetic Information Processing; B 09121 Transcription; C 03040 Spliceosome [PATH:ko03040]|A 9120 Genetic Information Processing; B 09123 Folding, sorting and degradation; C 04141 Protein processing in endoplasmic reticulum [PATH:ko04141]|A 9130 Environmental Information Processing; B 09132 Signal transduction; C 04010 MAPK signaling pathway [PATH:ko04010]|A 9140 Cellular Processes; B 09141…	37.212	9.75875	2.66911	3.65619	0.000255996	0.000808758	37.212	9.74986	2.66911	3.65286	0.000259339	0.000804001	37.212	9.79082	2.66911	3.6682	0.000244262	0.000948489	24.3	89.06	262.02	0	0	0	0	0	0	0	0	0
Am_Rn_001684	F:GO:0005524; C:GO:0016021; F:GO:0016887; F:GO:0042626; P:GO:0055085	F:ATP binding; C:integral component of membrane; F:ATP hydrolysis activity; F:ATPase-coupled transmembrane transporter activity; P:transmembrane transport	K05658	ABCB1, CD243; ATP-binding cassette, subfamily B (MDR/TAP), member 1 [EC:7.6.2.2]	A 9130 Environmental Information Processing; B 09131 Membrane transport; C 02010 ABC transporters [PATH:ko02010]|A 9150 Organismal Systems; B 09154 Digestive system; C 04976 Bile secretion [PATH:ko04976]|A 9160 Human Diseases; B 09161 Cancer: overview; C 05206 MicroRNAs in cancer [PATH:ko05206]|A 9160 Human Diseases; B 09162 Cancer: specific types; C 05226 Gastric cancer [PATH:ko05226]	83.6998	-5.06318	2.97062	-1.70442	0.0883036	0.147968	83.6998	-1.99249	2.97352	-0.670077	0.502809	0.604063	83.6998	-0.314279	2.98039	-0.105449	0.916019	0.965907	19.19	0	0	435.32	175.2	290.12	92.83	0	0	0	34.3	0.01
Am_Rn_001685	F:GO:0003729; F:GO:0003743; C:GO:0005840; P:GO:0006446; C:GO:0016281	F:mRNA binding; F:translation initiation factor activity; C:ribosome; P:regulation of translational initiation; C:eukaryotic translation initiation factor 4F complex	K03260	EIF4G; translation initiation factor 4G	A 9160 Human Diseases; B 09166 Cardiovascular disease; C 05416 Viral myocarditis [PATH:ko05416]	2032.06	0.337986	0.347569	0.972427	0.330838	0.445553	2032.06	0.502372	0.347635	1.44511	0.148426	0.221868	2032.06	0.0752989	0.347475	0.216703	0.82844	0.902739	1425.46	2197.45	2285.68	1845.11	1863.07	2318.34	772.06	2256.07	2500.55	1875.78	2430.75	3074.84
Am_Rn_024828	.	.	.	.	.	1988.67	-0.18095	0.204379	-0.885362	0.375961	0.493406	1988.67	-0.600414	0.20418	-2.94061	0.00327566	0.00780148	1988.67	0.0836624	0.204518	0.40907	0.682488	0.789138	1546.02	1615	1125.22	2023.63	2200.64	2054.78	2845.21	2931.23	2529.25	1723.18	1729.38	1918.74
Am_Rn_104841	F:GO:0016657; P:GO:0034599	F:oxidoreductase activity, acting on NAD(P)H, nitrogenous group as acceptor; P:cellular response to oxidative stress	K07078	K07078; uncharacterized protein	None	36.9945	9.75019	3.20118	3.04582	0.00232051	0.00594228	36.9945	9.7413	3.20118	3.04304	0.00234202	0.00577162	36.9945	9.78226	3.20118	3.05583	0.00224435	0.0066849	4	37	329	0	0	0	0	0	0	0	0	0
Am_Rn_001697	.	.	.	.	.	219.156	0.549563	0.697731	0.787644	0.430905	0.549235	219.156	-0.119577	0.696574	-0.171665	0.863701	0.906486	219.156	-0.373812	0.696194	-0.536937	0.591311	0.71016	79.16	325.35	153.16	106.02	252.02	106.67	70.99	475.59	229.7	178.92	374.79	367.4
Am_Rn_106910	C:GO:0016021	C:integral component of membrane	.	.	.	36.663	9.7373	2.25687	4.31451	1.59958e-05	6.35106e-05	36.663	9.72842	2.25687	4.31057	1.62833e-05	6.52979e-05	36.663	9.76938	2.25687	4.32872	1.49978e-05	7.89054e-05	81	93	190	0	0	0	0	0	0	0	0	0
Am_Rn_118850	.	.	.	.	.	36.5185	9.73151	2.17606	4.47208	7.74628e-06	3.24809e-05	36.5185	9.72262	2.17606	4.468	7.89559e-06	3.37282e-05	36.5185	9.76358	2.17606	4.48682	7.22946e-06	4.11143e-05	155	105	96	0	0	0	0	0	0	0	0	0
Am_Rn_043395	P:GO:0006855; F:GO:0015297; C:GO:0016021; F:GO:0042910	P:xenobiotic transmembrane transport; F:antiporter activity; C:integral component of membrane; F:xenobiotic transmembrane transporter activity	K03327	TC.MATE, SLC47A, norM, mdtK, dinF; multidrug resistance protein, MATE family	None	71.7995	6.11079	2.15011	2.84208	0.00448202	0.0107459	71.7995	9.66139	2.41781	3.99592	6.44435e-05	0.000227796	71.7995	4.73823	2.12611	2.22859	0.0258409	0.0554607	172.42	536.59	0	6.9	4.91	0	0.74	0	0	18.89	14.04	0
Am_Rn_104613	F:GO:0003735; C:GO:0005840; P:GO:0006412; P:GO:0042254	F:structural constituent of ribosome; C:ribosome; P:translation; P:ribosome biogenesis	K02983	RP-S30e, RPS30; small subunit ribosomal protein S30e	A 9120 Genetic Information Processing; B 09122 Translation; C 03010 Ribosome [PATH:ko03010]|A 9160 Human Diseases; B 09172 Infectious disease: viral; C 05171 Coronavirus disease - COVID-19 [PATH:ko05171]	1300.1	0.194343	0.267842	0.725588	0.468091	0.58513	1300.1	-0.600467	0.267325	-2.2462	0.0246909	0.0465567	1300.1	-0.297409	0.267464	-1.11196	0.266155	0.385157	818.99	1025.37	958.57	918.6	1012.24	1250.83	2344.61	1470.09	1476.83	1405.01	1512	1631.36
Am_Rn_021242	P:GO:0006486; C:GO:0016021; F:GO:0102983	P:protein glycosylation; C:integral component of membrane; F:xylogalacturonan beta-1,3-xylosyltransferase activity	.	.	.	135.652	-0.751754	0.221876	-3.38818	0.00070359	0.0020205	135.652	-0.600752	0.222899	-2.69517	0.0070352	0.0153353	135.652	-0.265451	0.225029	-1.17963	0.238148	0.35257	81.81	81.99	85.2	158.28	155.06	236.72	115	169.41	210.96	131.12	128.14	137.81
Am_Rn_074101	F:GO:0005524; C:GO:0005737; C:GO:0005856	F:ATP binding; C:cytoplasm; C:cytoskeleton	K10355	ACTF; actin, other eukaryote	None	36.3412	9.72186	1.75774	5.53088	3.18628e-08	1.95791e-07	36.3412	8.75118	1.75774	4.97865	6.40296e-07	3.35892e-06	36.3412	9.75394	1.75774	5.54913	2.87099e-08	2.73861e-07	67	87.02	207	0	0	0	0	0	1	0	0	0
Am_Rn_001735	P:GO:0000462; C:GO:0030686; C:GO:0032040; C:GO:0034455; P:GO:0045943	P:maturation of SSU-rRNA from tricistronic rRNA transcript (SSU-rRNA, 5.8S rRNA, LSU-rRNA); C:90S preribosome; C:small-subunit processome; C:t-UTP complex; P:positive regulation of transcription by RNA polymerase I	K14550	UTP10, HEATR1; U3 small nucleolar RNA-associated protein 10	A 9120 Genetic Information Processing; B 09122 Translation; C 03008 Ribosome biogenesis in eukaryotes [PATH:ko03008]	601.668	-0.581904	0.680996	-0.85449	0.392834	0.511241	601.668	0.37621	0.681639	0.55192	0.581003	0.671382	601.668	-0.843257	0.68087	-1.2385	0.215531	0.325053	488.83	568.5	125.09	649.57	771.85	876	83.61	574	577.1	514.47	882.2	1430.29
Am_Rn_039126	F:GO:0004322; F:GO:0005507; C:GO:0005886; P:GO:0006118; P:GO:0006826; F:GO:0008447; P:GO:0015994; P:GO:0019852; P:GO:0055072	F:ferroxidase activity; F:copper ion binding; C:plasma membrane; P:obsolete electron transport; P:iron ion transport; F:L-ascorbate oxidase activity; P:chlorophyll metabolic process; P:L-ascorbic acid metabolic process; P:iron ion homeostasis	K00423	E1.10.3.3; L-ascorbate oxidase [EC:1.10.3.3]	A 9100 Metabolism; B 09101 Carbohydrate metabolism; C 00053 Ascorbate and aldarate metabolism [PATH:ko00053]	2733.01	-21.1139	3.68417	-5.73099	9.98472e-09	6.62802e-08	2733.01	-27.8611	3.6833	-7.56417	3.90345e-14	6.5905e-13	2733.01	-12.707	3.86706	-3.28595	0.00101638	0.0033267	0	0	0	0	308	0	23212.5	4977.04	3330.84	0	0	1
Am_Rn_014099	F:GO:0004693; F:GO:0005524; C:GO:0005634; C:GO:0005737; P:GO:0006468; P:GO:0009069; P:GO:0010468; P:GO:0035556; P:GO:0051726; P:GO:0051726	F:cyclin-dependent protein serine/threonine kinase activity; F:ATP binding; C:nucleus; C:cytoplasm; P:protein phosphorylation; P:serine family amino acid metabolic process; P:regulation of gene expression; P:intracellular signal transduction; P:regulation of cell cycle; P:regulation of cell cycle	K08829	MAK; male germ cell-associated kinase [EC:2.7.11.22]	None	147.169	10.9123	1.94017	5.62441	1.86147e-08	1.1834e-07	147.169	1.25788	1.54319	0.815118	0.415005	0.52242	147.169	1.47525	1.54338	0.955854	0.339146	0.466658	366.24	0.06	417.43	0	0	0	27.95	229	210	117.57	164.57	107.2
Am_Rn_029615	F:GO:0043167	F:ion binding	.	.	.	82.2122	10.86	4.24736	2.55687	0.0105619	0.0230693	82.2122	5.72323	4.09403	1.39795	0.162129	0.239187	82.2122	6.54782	4.10345	1.59569	0.110559	0.188276	278.46	0	485.46	0	0	0	0	19.88	0	10.76	0	0
Am_Rn_076100	F:GO:0004365; P:GO:0006094; P:GO:0006096; F:GO:0016853; F:GO:0050661; F:GO:0051287	F:glyceraldehyde-3-phosphate dehydrogenase (NAD+) (phosphorylating) activity; P:gluconeogenesis; P:glycolytic process; F:isomerase activity; F:NADP binding; F:NAD binding	K00134	GAPDH, gapA; glyceraldehyde 3-phosphate dehydrogenase (phosphorylating) [EC:1.2.1.12]	A 9100 Metabolism; B 09101 Carbohydrate metabolism; C 00010 Glycolysis / Gluconeogenesis [PATH:ko00010]|A 9100 Metabolism; B 09102 Energy metabolism; C 00710 Carbon fixation in photosynthetic organisms [PATH:ko00710]|A 9130 Environmental Information Processing; B 09132 Signal transduction; C 04066 HIF-1 signaling pathway [PATH:ko04066]|A 9160 Human Diseases; B 09171 Infectious disease: bacterial;…	35.8538	9.70518	2.49827	3.88476	0.000102433	0.000351177	35.8538	9.69629	2.49827	3.8812	0.000103943	0.000351807	35.8538	9.73725	2.49827	3.89759	9.7153e-05	0.00041995	32	145	189	0	0	0	0	0	0	0	0	0
Am_Rn_092530	.	.	.	.	.	35.9217	9.70471	1.60516	6.04596	1.48521e-09	1.10518e-08	35.9217	8.73403	1.60516	5.44124	5.29124e-08	3.40571e-07	35.9217	9.73679	1.60516	6.06594	1.31181e-09	1.59851e-08	151.09	85.5	111.29	0	0	0	0	0	1	0	0	0
Am_Rn_051117	.	.	.	.	.	36.1914	9.70404	3.21207	3.02112	0.00251843	0.00640451	36.1914	6.65098	3.06417	2.17056	0.0299643	0.0551914	36.1914	9.73611	3.21207	3.0311	0.00243662	0.00719069	13.78	1	338.57	0	0	0	4.15	0	0	0	0	0
Am_Rn_040772	P:GO:0000162; F:GO:0004069; C:GO:0005759; P:GO:0006103; P:GO:0006107; P:GO:0006522; P:GO:0006525; P:GO:0006531; P:GO:0006534; P:GO:0006536; P:GO:0006560; P:GO:0006571; P:GO:0009094; P:GO:0009821; P:GO:0015976; F:GO:0030170	P:tryptophan biosynthetic process; F:L-aspartate:2-oxoglutarate aminotransferase activity; C:mitochondrial matrix; P:2-oxoglutarate metabolic process; P:oxaloacetate metabolic process; P:alanine metabolic process; P:arginine metabolic process; P:aspartate metabolic process; P:cysteine metabolic process; P:glutamate metabolic process; P:proline metabolic process; P:tyrosine biosynthetic process; P…	K00811	ASP5; aspartate aminotransferase, chloroplastic [EC:2.6.1.1]	A 9100 Metabolism; B 09105 Amino acid metabolism; C 00250 Alanine, aspartate and glutamate metabolism [PATH:ko00250]|A 9100 Metabolism; B 09105 Amino acid metabolism; C 00270 Cysteine and methionine metabolism [PATH:ko00270]|A 9100 Metabolism; B 09105 Amino acid metabolism; C 00220 Arginine biosynthesis [PATH:ko00220]|A 9100 Metabolism; B 09105 Amino acid metabolism; C 00330 Arginine and proline …	36.7883	9.70013	2.68051	3.61877	0.000296009	0.000922654	36.7883	5.07272	2.43965	2.07928	0.0375912	0.0673402	36.7883	9.73221	2.68051	3.63073	0.000282617	0.00107701	115.45	79.57	154.57	0	0	0	0	0	15.38	0	0	0
Am_Rn_001763	F:GO:0016772; P:GO:0044237	F:transferase activity, transferring phosphorus-containing groups; P:cellular metabolic process	.	.	.	287.972	-0.0723033	0.462009	-0.156498	0.875641	0.937793	287.972	-0.204421	0.461808	-0.442653	0.658016	0.736632	287.972	-0.160025	0.461802	-0.346522	0.72895	0.827637	104	201.89	362.85	271.96	284.57	347.9	415.43	258.41	282.37	375.32	373.32	225.03
Am_Rn_052141	F:GO:0003746; F:GO:0005525; C:GO:0005840; P:GO:0006448	F:translation elongation factor activity; F:GTP binding; C:ribosome; P:regulation of translational elongation	K03234	EEF2; elongation factor 2	A 9130 Environmental Information Processing; B 09132 Signal transduction; C 04152 AMPK signaling pathway [PATH:ko04152]|A 9150 Organismal Systems; B 09152 Endocrine system; C 04921 Oxytocin signaling pathway [PATH:ko04921]	816.074	-11.209	1.42794	-7.84976	4.16845e-15	6.3083e-14	816.074	-12.4606	1.42769	-8.72777	2.59732e-18	7.51817e-17	816.074	-12.7023	1.42766	-8.8973	5.72203e-19	2.93557e-17	0	0	0	668.43	276.06	773.03	2526.41	807.27	346.92	2442.91	1481.5	907.05
Am_Rn_070575	.	.	.	.	.	273.474	12.0223	1.80232	6.67045	2.55028e-11	2.42312e-10	273.474	9.60033	1.60295	5.98915	2.10936e-09	1.74592e-08	273.474	0.917692	1.36472	0.672438	0.501305	0.627762	310	1270	280	0	0	0	0	3	0	1093	75	54
Am_Rn_071798	P:GO:0006869; F:GO:0008289; C:GO:0016021	P:lipid transport; F:lipid binding; C:integral component of membrane	.	.	.	3083.77	-14.7002	1.20666	-12.1825	3.85096e-34	2.90814e-32	3083.77	-14.4533	1.20667	-11.9779	4.6401e-33	5.9418e-31	3083.77	-12.6397	1.2068	-10.4737	1.14052e-25	1.22832e-23	0	0	0	5452.7	4853.31	9089.64	4114.4	6391.46	5591.44	1781.09	1603.19	1264.18
Am_Rn_038007	.	.	K07199	PRKAB; 5'-AMP-activated protein kinase, regulatory beta subunit	A 9130 Environmental Information Processing; B 09132 Signal transduction; C 04371 Apelin signaling pathway [PATH:ko04371]|A 9130 Environmental Information Processing; B 09132 Signal transduction; C 04068 FoxO signaling pathway [PATH:ko04068]|A 9130 Environmental Information Processing; B 09132 Signal transduction; C 04152 AMPK signaling pathway [PATH:ko04152]|A 9140 Cellular Processes; B 09144 Ce…	379.027	-1.14723	0.223748	-5.12735	2.93849e-07	1.55914e-06	379.027	-0.60939	0.224956	-2.70892	0.00675021	0.0147926	379.027	-0.383709	0.225456	-1.70192	0.0887698	0.156463	168.54	244.56	212.79	663.18	422.26	710.21	388.36	405.18	426.74	390.38	375.27	307.07
Am_Rn_103279	F:GO:0003735; C:GO:0005840; P:GO:0006412; P:GO:0042254	F:structural constituent of ribosome; C:ribosome; P:translation; P:ribosome biogenesis	K02866	RP-L10e, RPL10; large subunit ribosomal protein L10e	A 9120 Genetic Information Processing; B 09122 Translation; C 03010 Ribosome [PATH:ko03010]|A 9160 Human Diseases; B 09172 Infectious disease: viral; C 05171 Coronavirus disease - COVID-19 [PATH:ko05171]	35.5511	9.69286	2.38362	4.06644	4.77366e-05	0.000174691	35.5511	9.68398	2.38362	4.06271	4.85056e-05	0.000176258	35.5511	9.72494	2.38362	4.0799	4.50557e-05	0.000211212	68	79	206	0	0	0	0	0	0	0	0	0
Am_Rn_053358	C:GO:0016021	C:integral component of membrane	K21989	TMEM63, CSC1; calcium permeable stress-gated cation channel	None	35.5514	9.69275	3.45288	2.80715	0.00499815	0.0118373	35.5514	9.68386	3.45288	2.80458	0.00503823	0.0114042	35.5514	9.72482	3.45288	2.81644	0.00485588	0.0131201	1	36.97	318.47	0	0	0	0	0	0	0	0	0
Am_Rn_090021	F:GO:0003677	F:DNA binding	K03627	MBF1; putative transcription factor	None	35.0161	9.6709	3.23077	2.99337	0.00275913	0.00695401	35.0161	9.66201	3.23077	2.99062	0.0027841	0.00674074	35.0161	9.70297	3.23077	3.0033	0.00267069	0.00778693	4	33	313	0	0	0	0	0	0	0	0	0
Am_Rn_001781	F:GO:0004301; F:GO:0004713; C:GO:0005829; P:GO:0006805; P:GO:0009636; P:GO:0010143; P:GO:0018108	F:epoxide hydrolase activity; F:protein tyrosine kinase activity; C:cytosol; P:xenobiotic metabolic process; P:response to toxic substance; P:cutin biosynthetic process; P:peptidyl-tyrosine phosphorylation	K08726	EPHX2; soluble epoxide hydrolase / lipid-phosphate phosphatase [EC:3.3.2.10 3.1.3.76]	A 9100 Metabolism; B 09103 Lipid metabolism; C 00590 Arachidonic acid metabolism [PATH:ko00590]|A 9100 Metabolism; B 09111 Xenobiotics biodegradation and metabolism; C 00625 Chloroalkane and chloroalkene degradation [PATH:ko00625]|A 9140 Cellular Processes; B 09141 Transport and catabolism; C 04146 Peroxisome [PATH:ko04146]|A 9160 Human Diseases; B 09161 Cancer: overview; C 05207 Chemical carcino…	262.396	-0.163544	2.95621	-0.0553222	0.955882	0.998015	262.396	-2.17217	2.95569	-0.734912	0.462393	0.568127	262.396	0.291298	2.95644	0.0985299	0.921511	0.969577	150.91	201.68	0	311.47	166.57	0	1010.67	894.17	0	216.08	155.95	0
Am_Rn_024083	F:GO:0001097; F:GO:0003677; F:GO:0003743; C:GO:0005673; C:GO:0005840; P:GO:0006367; P:GO:0006446	F:TFIIH-class transcription factor complex binding; F:DNA binding; F:translation initiation factor activity; C:transcription factor TFIIE complex; C:ribosome; P:transcription initiation at RNA polymerase II promoter; P:regulation of translational initiation	K03137	TFIIE2, GTF2E2, TFA2; transcription initiation factor TFIIE subunit beta	A 9120 Genetic Information Processing; B 09121 Transcription; C 03022 Basal transcription factors [PATH:ko03022]|A 9160 Human Diseases; B 09161 Cancer: overview; C 05203 Viral carcinogenesis [PATH:ko05203]	342.478	-0.140889	0.178446	-0.789534	0.4298	0.548124	342.478	-0.609712	0.176877	-3.44709	0.00056667	0.00162151	342.478	-0.195511	0.178099	-1.09777	0.272306	0.391999	219.79	281.99	212.53	317.06	286.79	420.65	471.12	457.14	462.18	346.71	391.68	339.04
Am_Rn_010513	P:GO:0000492; C:GO:0000812; F:GO:0005524; C:GO:0005657; P:GO:0006338; P:GO:0006357; P:GO:0016573; F:GO:0016787; C:GO:0031011; P:GO:0032508; C:GO:0035267; F:GO:0043139; C:GO:0097255	P:box C/D snoRNP assembly; C:Swr1 complex; F:ATP binding; C:replication fork; P:chromatin remodeling; P:regulation of transcription by RNA polymerase II; P:histone acetylation; F:hydrolase activity; C:Ino80 complex; P:DNA duplex unwinding; C:NuA4 histone acetyltransferase complex; F:5'-3' DNA helicase activity; C:R2TP complex	K11338	RUVBL2, RVB2, INO80J; RuvB-like protein 2 [EC:5.6.2.3]	None	1305.09	-1.88579	0.18794	-10.034	1.08054e-23	3.80233e-22	1305.09	-0.610843	0.188859	-3.23438	0.00121908	0.00322508	1305.09	0.124997	0.189806	0.658549	0.510185	0.636352	595.22	637.48	579.6	2738.58	2120.68	3955.08	960.53	1329.75	1304.86	708.39	666.36	831.69
Am_Rn_001804	.	.	K14569	BMS1; ribosome biogenesis protein BMS1	A 9120 Genetic Information Processing; B 09122 Translation; C 03008 Ribosome biogenesis in eukaryotes [PATH:ko03008]	207.613	-1.03121	1.09865	-0.938617	0.347927	0.463817	207.613	-0.699515	1.09893	-0.636539	0.524425	0.623745	207.613	-0.465723	1.09912	-0.423725	0.671767	0.779726	0	155.11	200.32	347.44	155.49	412.91	127.05	257.85	351.84	179.49	189.1	256.56
Am_Rn_082534	F:GO:0005509; F:GO:0005544	F:calcium ion binding; F:calcium-dependent phospholipid binding	K17098	ANNAT; annexin D	None	34.1323	9.63409	2.45634	3.92214	8.77669e-05	0.000304628	34.1323	9.6252	2.45634	3.91852	8.90944e-05	0.00030562	34.1323	9.66616	2.45634	3.9352	8.31292e-05	0.00036515	66	67	205	0	0	0	0	0	0	0	0	0
Am_Rn_049402	F:GO:0010333; F:GO:0046872	F:terpene synthase activity; F:metal ion binding	.	.	.	35.8058	9.62944	1.6021	6.01051	1.84939e-09	1.359e-08	35.8058	4.26421	1.12765	3.78149	0.000155892	0.000507697	35.8058	9.66152	1.6021	6.03053	1.63421e-09	1.96602e-08	75.67	175.46	94.96	0	0	0	15.4	3	3	0	0	0
Am_Rn_114464	.	.	.	.	.	33.6586	9.61368	2.90626	3.30792	0.000939914	0.00262383	33.6586	9.6048	2.90626	3.30486	0.000950227	0.00258221	33.6586	9.64576	2.90626	3.31896	0.000903544	0.00300095	248	21	41	0	0	0	0	0	0	0	0	0
Am_Rn_001825	F:GO:0004301; F:GO:0004713; C:GO:0005829; P:GO:0006805; P:GO:0009636; P:GO:0010143; P:GO:0018108	F:epoxide hydrolase activity; F:protein tyrosine kinase activity; C:cytosol; P:xenobiotic metabolic process; P:response to toxic substance; P:cutin biosynthetic process; P:peptidyl-tyrosine phosphorylation	K08726	EPHX2; soluble epoxide hydrolase / lipid-phosphate phosphatase [EC:3.3.2.10 3.1.3.76]	A 9100 Metabolism; B 09103 Lipid metabolism; C 00590 Arachidonic acid metabolism [PATH:ko00590]|A 9100 Metabolism; B 09111 Xenobiotics biodegradation and metabolism; C 00625 Chloroalkane and chloroalkene degradation [PATH:ko00625]|A 9140 Cellular Processes; B 09141 Transport and catabolism; C 04146 Peroxisome [PATH:ko04146]|A 9160 Human Diseases; B 09161 Cancer: overview; C 05207 Chemical carcino…	1246.74	2.8565	2.10253	1.3586	0.174274	0.262682	1246.74	0.374302	2.10216	0.178056	0.858679	0.902769	1246.74	3.10721	2.1026	1.47779	0.139464	0.227957	0	985.45	5213.49	12.43	266.61	894.77	24.36	2282.95	4264.76	11.31	338.23	604.19
Am_Rn_051342	F:GO:0000166; F:GO:0003938; P:GO:0006144; P:GO:0006177; C:GO:0042720; F:GO:0046872	F:nucleotide binding; F:IMP dehydrogenase activity; P:purine nucleobase metabolic process; P:GMP biosynthetic process; C:mitochondrial inner membrane peptidase complex; F:metal ion binding	K00088	IMPDH, guaB; IMP dehydrogenase [EC:1.1.1.205]	A 9100 Metabolism; B 09104 Nucleotide metabolism; C 00230 Purine metabolism [PATH:ko00230]|A 9100 Metabolism; B 09111 Xenobiotics biodegradation and metabolism; C 00983 Drug metabolism - other enzymes [PATH:ko00983]	33.4548	9.60507	3.33893	2.87669	0.00401868	0.00974146	33.4548	9.59618	3.33893	2.87403	0.0040527	0.00942172	33.4548	9.63714	3.33893	2.8863	0.00389803	0.0108483	4	17	312	0	0	0	0	0	0	0	0	0
Am_Rn_054138	C:GO:0005628; C:GO:0005634; F:GO:0008525; F:GO:0008526; P:GO:0015914; P:GO:0031322; C:GO:0032153; C:GO:0035838; P:GO:0048193	C:prospore membrane; C:nucleus; F:phosphatidylcholine transporter activity; F:phosphatidylinositol transfer activity; P:phospholipid transport; P:ascospore-type prospore-specific spindle pole body remodeling; C:cell division site; C:growing cell tip; P:Golgi vesicle transport	K02155	ATPeV0C, ATP6L; V-type H+-transporting ATPase 16kDa proteolipid subunit	A 9100 Metabolism; B 09102 Energy metabolism; C 00190 Oxidative phosphorylation [PATH:ko00190]|A 9140 Cellular Processes; B 09141 Transport and catabolism; C 04145 Phagosome [PATH:ko04145]|A 9140 Cellular Processes; B 09141 Transport and catabolism; C 04142 Lysosome [PATH:ko04142]|A 9150 Organismal Systems; B 09155 Excretory system; C 04966 Collecting duct acid secretion [PATH:ko04966]|A 9150 Org…	398.539	0.5219	0.276285	1.88899	0.0588933	0.104245	398.539	-0.610975	0.273988	-2.22993	0.0257521	0.0482866	398.539	0.370187	0.275768	1.34238	0.179472	0.280008	266.3	260.88	458.9	260.33	303.31	331.83	633.69	612.22	692.56	285.63	305.25	425.98
Am_Rn_084892	.	.	.	.	.	33.3756	9.60162	3.53365	2.71719	0.00658379	0.0150969	33.3756	9.59274	3.53365	2.71468	0.00663399	0.0145609	33.3756	9.6337	3.53365	2.72627	0.00640544	0.0166836	1	22	310	0	0	0	0	0	0	0	0	0
Am_Rn_001838	F:GO:0003743; F:GO:0003924; F:GO:0005525; C:GO:0005840; P:GO:0006446	F:translation initiation factor activity; F:GTPase activity; F:GTP binding; C:ribosome; P:regulation of translational initiation	K03243	EIF5B; translation initiation factor 5B	None	149.784	-1.05967	0.564518	-1.87712	0.0605017	0.106746	149.784	0.269536	0.567724	0.474765	0.634954	0.716862	149.784	0.650429	0.569093	1.14292	0.253071	0.369846	52.69	138.65	142.08	208.76	261.47	431.46	32.5	155.38	179.94	79.19	118.33	78.23
Am_Rn_093175	.	.	.	.	.	34.7421	6.14677	0.795923	7.72281	1.13789e-14	1.64297e-13	34.7421	4.75229	0.647738	7.33674	2.18852e-13	3.29401e-12	34.7421	9.61953	1.2939	7.43453	1.04942e-13	2.54991e-12	128.69	100.06	95.4	2.03	2.01	2.01	3	4.02	9.05	0	0	0
Am_Rn_116662	F:GO:0003735; C:GO:0005840; P:GO:0006412; P:GO:0042254	F:structural constituent of ribosome; C:ribosome; P:translation; P:ribosome biogenesis	K02929	RP-L44e, RPL44; large subunit ribosomal protein L44e	A 9120 Genetic Information Processing; B 09122 Translation; C 03010 Ribosome [PATH:ko03010]|A 9160 Human Diseases; B 09172 Infectious disease: viral; C 05171 Coronavirus disease - COVID-19 [PATH:ko05171]	33.0773	9.58576	1.67443	5.72478	1.03569e-08	6.85869e-08	33.0773	8.61508	1.67443	5.14507	2.67419e-07	1.51452e-06	33.0773	9.61784	1.67443	5.74393	9.25025e-09	9.702e-08	79	83	165	0	0	0	0	0	1	0	0	0
Am_Rn_001851	F:GO:0003677; F:GO:0004674; F:GO:0005524; C:GO:0005886; P:GO:0006468; P:GO:0009069; C:GO:0016021	F:DNA binding; F:protein serine/threonine kinase activity; F:ATP binding; C:plasma membrane; P:protein phosphorylation; P:serine family amino acid metabolic process; C:integral component of membrane	.	.	.	320.414	0.0236555	0.313658	0.0754182	0.939882	0.986154	320.414	0.639524	0.315181	2.02907	0.0424514	0.0748684	320.414	0.350938	0.314284	1.11663	0.264154	0.382867	253.64	462.17	232.87	475.38	338.74	365.09	153.94	294.22	342.59	323.3	320.92	323.97
Am_Rn_001864	C:GO:0005886; P:GO:0006820; F:GO:0008381; C:GO:0016021; P:GO:0055085	C:plasma membrane; P:anion transport; F:mechanosensitive ion channel activity; C:integral component of membrane; P:transmembrane transport	K22048	MSL4S; mechanosensitive ion channel protein 4/5/6/7/8/9/10	None	1038.9	0.210979	0.579738	0.363922	0.715916	0.809439	1038.9	0.450628	0.579837	0.777163	0.437063	0.544325	1038.9	0.504285	0.579839	0.869698	0.384466	0.513881	239.55	1060.06	1896.64	1158.98	892.1	1480.1	693.96	1194.39	1099.68	574.08	1296.96	1048.96
Am_Rn_103475	F:GO:0003735; C:GO:0005840; P:GO:0006412; P:GO:0042254	F:structural constituent of ribosome; C:ribosome; P:translation; P:ribosome biogenesis	K02873	RP-L13e, RPL13; large subunit ribosomal protein L13e	A 9120 Genetic Information Processing; B 09122 Translation; C 03010 Ribosome [PATH:ko03010]|A 9160 Human Diseases; B 09172 Infectious disease: viral; C 05171 Coronavirus disease - COVID-19 [PATH:ko05171]	32.9087	9.58143	2.50841	3.81972	0.000133601	0.000447032	32.9087	9.57254	2.50841	3.81618	0.000135533	0.00044748	32.9087	9.6135	2.50841	3.83251	0.000126842	0.000532337	56	68	203	0	0	0	0	0	0	0	0	0
Am_Rn_046135	.	.	.	.	.	32.8805	5.65814	1.09914	5.14778	2.63582e-07	1.41131e-06	32.8805	9.54214	1.5302	6.23587	4.49277e-10	4.1612e-09	32.8805	9.5831	1.5302	6.26264	3.78522e-10	5.08177e-09	128.69	49.73	131.56	4.15	2.96	1.24	0	0	0	0	0	0.16
Am_Rn_068148	F:GO:0046872; F:GO:0051213	F:metal ion binding; F:dioxygenase activity	.	.	.	2478.64	-0.68997	0.269533	-2.55987	0.0104711	0.0228974	2478.64	-0.611574	0.26956	-2.26879	0.0232812	0.0441994	2478.64	-0.368481	0.269623	-1.36665	0.171734	0.270297	1430.03	1957.09	1175.33	3121.59	2674.08	3719.47	1666.23	3781.89	3706.65	2289.27	2913.15	2533.61
Am_Rn_109537	F:GO:0003735; P:GO:0006412; C:GO:0015935; P:GO:0042254	F:structural constituent of ribosome; P:translation; C:small ribosomal subunit; P:ribosome biogenesis	K02973	RP-S23e, RPS23; small subunit ribosomal protein S23e	A 9120 Genetic Information Processing; B 09122 Translation; C 03010 Ribosome [PATH:ko03010]|A 9160 Human Diseases; B 09172 Infectious disease: viral; C 05171 Coronavirus disease - COVID-19 [PATH:ko05171]	32.196	9.5499	2.34464	4.07307	4.63972e-05	0.000170218	32.196	9.54101	2.34464	4.06928	4.71583e-05	0.00017173	32.196	9.58197	2.34464	4.08675	4.37456e-05	0.000205729	62	107	154	0	0	0	0	0	0	0	0	0
Am_Rn_001904	C:GO:0005634; P:GO:0042752	C:nucleus; P:regulation of circadian rhythm	.	.	.	196.694	2.39409	1.63157	1.46735	0.14228	0.222003	196.694	1.01793	1.63013	0.62445	0.532332	0.627062	196.694	3.43805	1.63396	2.10412	0.0353677	0.0721503	623.13	38.22	375.9	173.81	81.32	0	166.97	307.26	232.7	0	56.2	80.47
Am_Rn_025116	P:GO:0006012; F:GO:0047274	P:galactose metabolic process; F:galactinol-sucrose galactosyltransferase activity	K06617	E2.4.1.82; raffinose synthase [EC:2.4.1.82]	A 9100 Metabolism; B 09101 Carbohydrate metabolism; C 00052 Galactose metabolism [PATH:ko00052]	96.3965	2.46844	1.42043	1.73782	0.0822434	0.139081	96.3965	9.48009	1.8374	5.15951	2.47594e-07	1.4093e-06	96.3965	-0.957677	1.41107	-0.678688	0.497336	0.624249	114.1	39.41	145.16	0	57.88	11.57	0	0	0	423.86	294.58	57.52
Am_Rn_085900	.	.	.	.	.	30.7252	9.48202	4.24786	2.23219	0.0256026	0.050613	30.7252	9.47313	4.24786	2.2301	0.0257411	0.0482719	30.7252	9.51409	4.24786	2.23974	0.025108	0.0541376	228.32	0	53.36	0	0	0	0	0	0	0	0	0
Am_Rn_081264	P:GO:0006869; F:GO:0008289; C:GO:0016021	P:lipid transport; F:lipid binding; C:integral component of membrane	.	.	.	3058.75	-14.6037	1.19605	-12.21	2.7501e-34	2.10811e-32	3058.75	-14.5483	1.19605	-12.1637	4.85352e-34	6.55203e-32	3058.75	-12.581	1.19619	-10.5175	7.17333e-26	7.87024e-24	0	0	0	5331.49	4739.03	7989.55	4649.16	6294.23	6215.14	1648.22	1560.52	1255.73
Am_Rn_086860	F:GO:0003735; C:GO:0005840; P:GO:0006412; F:GO:0008097; P:GO:0042254	F:structural constituent of ribosome; C:ribosome; P:translation; F:5S rRNA binding; P:ribosome biogenesis	K02932	RP-L5e, RPL5; large subunit ribosomal protein L5e	A 9120 Genetic Information Processing; B 09122 Translation; C 03010 Ribosome [PATH:ko03010]|A 9160 Human Diseases; B 09172 Infectious disease: viral; C 05171 Coronavirus disease - COVID-19 [PATH:ko05171]	31.7137	9.52808	2.47871	3.84397	0.000121058	0.000408872	31.7137	9.51919	2.47871	3.84039	0.000122839	0.000409003	31.7137	9.56015	2.47871	3.85691	0.000114827	0.000487147	56.16	77	183	0	0	0	0	0	0	0	0	0
Am_Rn_104837	F:GO:0003676; P:GO:0010200	F:nucleic acid binding; P:response to chitin	.	.	.	61.5317	9.50943	1.37211	6.9305	4.19354e-12	4.41937e-11	61.5317	7.29233	0.955807	7.6295	2.35665e-14	4.0875e-13	61.5317	9.54151	1.37211	6.95388	3.55383e-12	6.80431e-11	174	119	305	1	0	0	1	3	1	0	1	0
Am_Rn_001947	.	.	.	.	.	298.321	-0.167751	0.740934	-0.226405	0.820886	0.895243	298.321	-0.483028	0.740618	-0.652196	0.514275	0.614861	298.321	-0.653421	0.740428	-0.882491	0.377511	0.507262	253.41	288.86	39.68	202.13	241.08	422.43	85.06	431.08	591.47	247.41	388.27	583.7
Am_Rn_001953	F:GO:0003676; C:GO:0005634; P:GO:0015074	F:nucleic acid binding; C:nucleus; P:DNA integration	.	.	.	296.906	0.200442	0.332201	0.603373	0.54626	0.659297	296.906	-0.0724429	0.331574	-0.218482	0.827054	0.877167	296.906	-0.113399	0.331384	-0.342198	0.732202	0.830396	317.83	255.67	153	329.07	243.15	250.05	296.75	388.59	309.28	336.74	391.72	322.87
Am_Rn_035727	.	.	.	.	.	283.748	-0.454474	0.24784	-1.83374	0.066693	0.116158	283.748	-0.61268	0.247462	-2.47585	0.0132918	0.026961	283.748	0.417951	0.2509	1.66581	0.0957519	0.166773	160.25	168	277	358.84	318	400.54	303.2	461.9	440.62	188	217.14	194.7
Am_Rn_050470	F:GO:0004722; P:GO:0006470; C:GO:0008287; F:GO:0046872	F:protein serine/threonine phosphatase activity; P:protein dephosphorylation; C:protein serine/threonine phosphatase complex; F:metal ion binding	K14803	PTC2_3; protein phosphatase PTC2/3 [EC:3.1.3.16]	None	76.9622	0.116518	0.261051	0.446343	0.655349	0.756033	76.9622	-0.613964	0.253124	-2.42555	0.0152854	0.0304819	76.9622	-0.124027	0.257584	-0.481502	0.63016	0.744111	48.84	67.87	52.2	62.37	66.62	72.06	112.83	112.55	103.34	70.13	74.37	98.66
Am_Rn_062018	P:GO:0006687; F:GO:0008195; P:GO:0009395; C:GO:0016021; P:GO:0016311; P:GO:0046486	P:glycosphingolipid metabolic process; F:phosphatidate phosphatase activity; P:phospholipid catabolic process; C:integral component of membrane; P:dephosphorylation; P:glycerolipid metabolic process	.	.	.	377.859	-0.750502	0.173722	-4.32013	1.55938e-05	6.20277e-05	377.859	-0.614037	0.174137	-3.52616	0.000421625	0.00124464	377.859	-0.0294081	0.176048	-0.167046	0.867334	0.930694	192.67	271.84	255.5	463.14	536.77	562.76	458.08	484.23	464.43	272.76	367.84	327.32
Am_Rn_026258	F:GO:0004656; F:GO:0005506; P:GO:0006525; P:GO:0006560; C:GO:0016021; P:GO:0018401; F:GO:0031418	F:procollagen-proline 4-dioxygenase activity; F:iron ion binding; P:arginine metabolic process; P:proline metabolic process; C:integral component of membrane; P:peptidyl-proline hydroxylation to 4-hydroxy-L-proline; F:L-ascorbic acid binding	K00472	P4HA; prolyl 4-hydroxylase [EC:1.14.11.2]	A 9100 Metabolism; B 09105 Amino acid metabolism; C 00330 Arginine and proline metabolism [PATH:ko00330]	189.963	0.425409	0.279236	1.52347	0.12764	0.202232	189.963	-0.614716	0.274842	-2.23662	0.0253114	0.0475597	189.963	0.176338	0.277701	0.634993	0.525433	0.650304	109.33	170.03	177.65	141.45	134.45	162.61	338.51	277.06	261.56	199.63	137.65	192.77
Am_Rn_107670	C:GO:0005840	C:ribosome	K02896	RP-L24e, RPL24; large subunit ribosomal protein L24e	A 9120 Genetic Information Processing; B 09122 Translation; C 03010 Ribosome [PATH:ko03010]|A 9160 Human Diseases; B 09172 Infectious disease: viral; C 05171 Coronavirus disease - COVID-19 [PATH:ko05171]	31.0751	9.49548	1.71559	5.53481	3.1157e-08	1.91647e-07	31.0751	8.5248	1.71559	4.96901	6.7296e-07	3.51805e-06	31.0751	9.52755	1.71559	5.5535	2.80001e-08	2.67779e-07	74	76	157	0	0	0	0	0	1	0	0	0
Am_Rn_008586	P:GO:0007010; F:GO:0051015	P:cytoskeleton organization; F:actin filament binding	.	.	.	587.409	0.245308	0.163953	1.49621	0.134599	0.211652	587.409	-0.615908	0.162023	-3.80135	0.000143907	0.00047283	587.409	0.0937504	0.163428	0.573651	0.566204	0.687176	433.71	535.18	387.29	453.61	475.22	551.63	827.98	990.91	840.01	510.02	518.25	651.65
Am_Rn_073761	P:GO:0009686; P:GO:0045487; F:GO:0046872; F:GO:0052634	P:gibberellin biosynthetic process; P:gibberellin catabolic process; F:metal ion binding; F:C-19 gibberellin 2-beta-dioxygenase activity	K04125	GA2ox; gibberellin 2beta-dioxygenase [EC:1.14.11.13]	A 9100 Metabolism; B 09109 Metabolism of terpenoids and polyketides; C 00904 Diterpenoid biosynthesis [PATH:ko00904]	647.784	5.54347	0.630666	8.78986	1.49745e-18	3.27966e-17	647.784	2.93815	0.62168	4.72615	2.28821e-06	1.08442e-05	647.784	9.52585	0.769541	12.3786	3.4122e-35	7.99657e-33	1426.49	458.82	3580.7	57.92	40	56.71	228.29	347.24	376.4	4	3	3
Am_Rn_062104	C:GO:0016021	C:integral component of membrane	.	.	.	30.25	9.45976	3.56254	2.65534	0.00792279	0.017824	30.25	9.45088	3.56254	2.65285	0.00798157	0.0171643	30.25	9.49184	3.56254	2.66435	0.00771382	0.0195542	1	22.25	279.25	0	0	0	0	0	0	0	0	0
Am_Rn_048458	P:GO:0006633; C:GO:0016021; F:GO:0016747	P:fatty acid biosynthetic process; C:integral component of membrane; F:acyltransferase activity, transferring groups other than amino-acyl groups	K15397	KCS; 3-ketoacyl-CoA synthase [EC:2.3.1.199]	A 9100 Metabolism; B 09103 Lipid metabolism; C 00062 Fatty acid elongation [PATH:ko00062]|A 9150 Organismal Systems; B 09159 Environmental adaptation; C 04626 Plant-pathogen interaction [PATH:ko04626]	2662.37	-14.254	1.24012	-11.4941	1.41301e-30	8.53654e-29	2662.37	-14.4568	1.24011	-11.6576	2.09791e-31	2.33596e-29	2662.37	-12.5098	1.24026	-10.0865	6.33949e-24	5.73176e-22	0	0	0	5048.08	4691.99	4090.63	2815.9	5607.91	8138.71	1920.55	1239.63	1082.12
Am_Rn_047874	F:GO:0005506; C:GO:0005829; P:GO:0009228; C:GO:0009570; F:GO:0016763; P:GO:0052837	F:iron ion binding; C:cytosol; P:thiamine biosynthetic process; C:chloroplast stroma; F:pentosyltransferase activity; P:thiazole biosynthetic process	K03146	THI4, THI1; cysteine-dependent adenosine diphosphate thiazole synthase [EC:2.4.2.60]	A 9100 Metabolism; B 09108 Metabolism of cofactors and vitamins; C 00730 Thiamine metabolism [PATH:ko00730]	3785.12	-13.4325	1.0928	-12.2918	1.00275e-34	7.96692e-33	3785.12	-10.8425	1.09297	-9.92025	3.39916e-23	1.75474e-21	3785.12	-12.5022	1.09283	-11.4402	2.63368e-30	4.31012e-28	1.6	0	0	7986.65	7484.51	13872.5	1382.58	1309.06	2102.39	5046.19	2761.03	7739.03
Am_Rn_086002	F:GO:0003723; F:GO:0003735; P:GO:0006412; C:GO:0015935; P:GO:0042254	F:RNA binding; F:structural constituent of ribosome; P:translation; C:small ribosomal subunit; P:ribosome biogenesis	K02981	RP-S2e, RPS2; small subunit ribosomal protein S2e	A 9120 Genetic Information Processing; B 09122 Translation; C 03010 Ribosome [PATH:ko03010]|A 9160 Human Diseases; B 09172 Infectious disease: viral; C 05171 Coronavirus disease - COVID-19 [PATH:ko05171]	30.0808	9.4518	2.47855	3.81345	0.000137041	0.000457438	30.0808	9.44292	2.47855	3.80986	0.000139044	0.000458207	30.0808	9.48388	2.47855	3.82639	0.000130037	0.000543719	61	74	164	0	0	0	0	0	0	0	0	0
Am_Rn_082369	C:GO:0016021	C:integral component of membrane	K08507	USE1; unconventional SNARE in the endoplasmic reticulum protein 1	A 9120 Genetic Information Processing; B 09123 Folding, sorting and degradation; C 04130 SNARE interactions in vesicular transport [PATH:ko04130]	203.529	-0.449274	0.201397	-2.23079	0.025695	0.0507725	203.529	-0.618796	0.200619	-3.08443	0.00203943	0.00510511	203.529	-0.31739	0.201915	-1.5719	0.115973	0.195788	134.9	144.4	112.75	232.36	200.01	263.98	251.79	257.69	263.1	181.44	247.81	217.64
Am_Rn_089838	F:GO:0003735; C:GO:0005840; P:GO:0006412; F:GO:0019843; P:GO:0042254	F:structural constituent of ribosome; C:ribosome; P:translation; F:rRNA binding; P:ribosome biogenesis	K02987	RP-S4e, RPS4; small subunit ribosomal protein S4e	A 9120 Genetic Information Processing; B 09122 Translation; C 03010 Ribosome [PATH:ko03010]|A 9160 Human Diseases; B 09172 Infectious disease: viral; C 05171 Coronavirus disease - COVID-19 [PATH:ko05171]	29.6429	9.43062	2.515	3.74974	0.000177015	0.000578512	29.6429	9.42174	2.515	3.74621	0.000179525	0.000576661	29.6429	9.4627	2.515	3.7625	0.000168225	0.000680847	66	62	165	0	0	0	0	0	0	0	0	0
Am_Rn_002001	F:GO:0004839; F:GO:0008270; F:GO:0016746; P:GO:0031396	F:ubiquitin activating enzyme activity; F:zinc ion binding; F:acyltransferase activity; P:regulation of protein ubiquitination	K10691	UBR4, ZUBR1; E3 ubiquitin-protein ligase UBR4 [EC:2.3.2.27]	A 9160 Human Diseases; B 09161 Cancer: overview; C 05203 Viral carcinogenesis [PATH:ko05203]|A 9160 Human Diseases; B 09172 Infectious disease: viral; C 05165 Human papillomavirus infection [PATH:ko05165]	311.821	-0.978514	1.36735	-0.715628	0.474221	0.590795	311.821	-1.11619	1.36729	-0.816353	0.414298	0.521746	311.821	-1.34375	1.36717	-0.982873	0.32567	0.451676	0	11.95	392.08	340.61	253.21	446.53	507.25	359.59	214.13	722.58	439.31	177.75
Am_Rn_091620	F:GO:0015288; F:GO:0022843; C:GO:0031359; C:GO:0034426; P:GO:0034765; C:GO:0046930; P:GO:0098655	F:porin activity; F:voltage-gated cation channel activity; C:integral component of chloroplast outer membrane; C:etioplast membrane; P:regulation of ion transmembrane transport; C:pore complex; P:cation transmembrane transport	.	.	.	31.0213	8.46194	2.5061	3.37653	0.000734051	0.00209791	31.0213	4.35912	2.23763	1.9481	0.051403	0.0886421	31.0213	9.4558	2.5061	3.77311	0.000161223	0.000656591	148.77	41.27	90.95	0	1.01	0	0	19.12	0	0	0	0
Am_Rn_002011	.	.	.	.	.	238.7	0.169556	0.438425	0.38674	0.698949	0.795028	238.7	0.864633	0.440263	1.9639	0.0495418	0.0857474	238.7	0.152441	0.438319	0.347785	0.728002	0.826806	215.28	370.77	135.77	262.84	216.03	346.58	72.37	245.53	201.07	267.36	241.38	340.25
Am_Rn_027194	P:GO:0000051; P:GO:0006144; F:GO:0009039; F:GO:0016151; P:GO:0019381; P:GO:0043419	P:obsolete urea cycle intermediate metabolic process; P:purine nucleobase metabolic process; F:urease activity; F:nickel cation binding; P:atrazine catabolic process; P:urea catabolic process	K01427	URE; urease [EC:3.5.1.5]	A 9100 Metabolism; B 09104 Nucleotide metabolism; C 00230 Purine metabolism [PATH:ko00230]|A 9100 Metabolism; B 09105 Amino acid metabolism; C 00220 Arginine biosynthesis [PATH:ko00220]|A 9100 Metabolism; B 09111 Xenobiotics biodegradation and metabolism; C 00791 Atrazine degradation [PATH:ko00791]	173.46	10.4916	1.27479	8.23006	1.87125e-16	3.30191e-15	173.46	0.337091	0.490778	0.68685	0.492177	0.593887	173.46	-0.0207639	0.489941	-0.0423805	0.966195	1	114.4	294.52	219.54	0	0	0	122.48	322.69	192.28	259.22	183.79	385.82
Am_Rn_022212	C:GO:0016021	C:integral component of membrane	.	.	.	111.486	-0.719278	0.268118	-2.68269	0.00730325	0.0165755	111.486	-0.619704	0.268843	-2.30507	0.0211624	0.0406705	111.486	-0.419318	0.269948	-1.55333	0.120345	0.201716	67.13	68.73	63.93	116.61	135.44	178.69	139.7	138.2	113.71	106.71	140.86	105.81
Am_Rn_077177	F:GO:0046983	F:protein dimerization activity	.	.	.	368.361	-0.144062	0.268773	-0.535998	0.59196	0.700711	368.361	-0.620174	0.267877	-2.31514	0.0206051	0.0397245	368.361	0.440578	0.270273	1.63012	0.103077	0.177556	170.77	329.15	346.94	375.55	325.26	506.04	574.11	482.35	583.9	271.96	296.36	244.51
Am_Rn_002018	F:GO:0003712; P:GO:0006355; P:GO:0006357; C:GO:0016592; C:GO:0070847	F:transcription coregulator activity; P:regulation of DNA-templated transcription; P:regulation of transcription by RNA polymerase II; C:mediator complex; C:core mediator complex	K15156	MED14, RGR1; mediator of RNA polymerase II transcription subunit 14	A 9150 Organismal Systems; B 09152 Endocrine system; C 04919 Thyroid hormone signaling pathway [PATH:ko04919]	711.871	-0.34625	0.296985	-1.16588	0.243662	0.347199	711.871	0.369528	0.297791	1.2409	0.214643	0.303118	711.871	-0.0305397	0.297248	-0.102741	0.918168	0.967403	653	432	625.05	808.42	923.92	1149.99	367.94	650.51	752.6	579.16	822	956.41
Am_Rn_093939	C:GO:0005750; P:GO:0006118; P:GO:0006122; F:GO:0008121; C:GO:0045275; P:GO:1902600	C:mitochondrial respiratory chain complex III; P:obsolete electron transport; P:mitochondrial electron transport, ubiquinol to cytochrome c; F:ubiquinol-cytochrome-c reductase activity; C:respiratory chain complex III; P:proton transmembrane transport	K00416	QCR6, UQCRH; ubiquinol-cytochrome c reductase subunit 6	A 9100 Metabolism; B 09102 Energy metabolism; C 00190 Oxidative phosphorylation [PATH:ko00190]|A 9150 Organismal Systems; B 09153 Circulatory system; C 04260 Cardiac muscle contraction [PATH:ko04260]|A 9150 Organismal Systems; B 09159 Environmental adaptation; C 04714 Thermogenesis [PATH:ko04714]|A 9160 Human Diseases; B 09161 Cancer: overview; C 05208 Chemical carcinogenesis - reactive oxygen sp…	539.267	-0.0441148	0.240903	-0.183122	0.854702	0.921515	539.267	-0.620512	0.239937	-2.58614	0.00970577	0.0204272	539.267	-0.424444	0.240156	-1.76737	0.0771666	0.139444	277.98	525.45	305.88	368.35	519.32	579.42	721.93	728.46	691.7	590.66	700.88	643.57
Am_Rn_076642	.	.	.	.	.	948.11	4.0935	0.728521	5.61892	1.92154e-08	1.21855e-07	948.11	4.32989	0.72894	5.93999	2.85044e-09	2.30003e-08	948.11	9.44658	0.8105	11.6553	2.15733e-31	3.85346e-29	3604	1060	3535	67	119	500	207	109	221	8	5	3
Am_Rn_133446	F:GO:0003735; C:GO:0005840; P:GO:0006412; P:GO:0042254	F:structural constituent of ribosome; C:ribosome; P:translation; P:ribosome biogenesis	K02921	RP-L37Ae, RPL37A; large subunit ribosomal protein L37Ae	A 9120 Genetic Information Processing; B 09122 Translation; C 03010 Ribosome [PATH:ko03010]|A 9160 Human Diseases; B 09172 Infectious disease: viral; C 05171 Coronavirus disease - COVID-19 [PATH:ko05171]	29.0998	9.40399	2.43381	3.86389	0.000111594	0.000379642	29.0998	9.3951	2.43381	3.86024	0.000113275	0.000380103	29.0998	9.43606	2.43381	3.87707	0.000105721	0.000452249	64	85	141	0	0	0	0	0	0	0	0	0
Am_Rn_114956	F:GO:0003723; F:GO:0003735; C:GO:0005840; P:GO:0006412; P:GO:0042254	F:RNA binding; F:structural constituent of ribosome; C:ribosome; P:translation; P:ribosome biogenesis	K02964	RP-S18e, RPS18; small subunit ribosomal protein S18e	A 9120 Genetic Information Processing; B 09122 Translation; C 03010 Ribosome [PATH:ko03010]|A 9160 Human Diseases; B 09172 Infectious disease: viral; C 05171 Coronavirus disease - COVID-19 [PATH:ko05171]	29.0617	9.40209	2.5115	3.74361	0.000181393	0.00059119	29.0617	9.39321	2.5115	3.74007	0.000183966	0.000589684	29.0617	9.43417	2.5115	3.75638	0.000172387	0.000696157	54	78	158	0	0	0	0	0	0	0	0	0
Am_Rn_115943	F:GO:0003735; C:GO:0005840; P:GO:0006412; P:GO:0042254	F:structural constituent of ribosome; C:ribosome; P:translation; P:ribosome biogenesis	.	.	.	29.0374	9.40091	2.48153	3.78835	0.00015165	0.000502848	29.0374	9.39203	2.48153	3.78477	0.000153851	0.000501799	29.0374	9.43299	2.48153	3.80128	0.000143953	0.000594523	53	90	148	0	0	0	0	0	0	0	0	0
Am_Rn_002040	C:GO:0016020	C:membrane	K17081	PHB2; prohibitin 2	None	247.5	0.201668	1.38206	0.145919	0.883985	0.944443	247.5	0.94229	1.38276	0.681458	0.495582	0.597097	247.5	-0.433341	1.38168	-0.313634	0.753799	0.847311	276.85	25.71	326.95	361.9	16.72	375.74	125.7	18.99	306.8	801	6.2	363.47
Am_Rn_094672	F:GO:0003955; P:GO:0006118; P:GO:0006694; F:GO:0010181	F:NAD(P)H dehydrogenase (quinone) activity; P:obsolete electron transport; P:steroid biosynthetic process; F:FMN binding	K03809	wrbA; NAD(P)H dehydrogenase (quinone) [EC:1.6.5.2]	A 9100 Metabolism; B 09108 Metabolism of cofactors and vitamins; C 00130 Ubiquinone and other terpenoid-quinone biosynthesis [PATH:ko00130]	28.7853	9.38816	3.60946	2.60099	0.00929557	0.0205775	28.7853	9.37927	3.60946	2.59853	0.00936249	0.019783	28.7853	9.42023	3.60946	2.60987	0.00905756	0.0224686	1	17	269	0	0	0	0	0	0	0	0	0
Am_Rn_072127	.	.	.	.	.	120.159	4.92608	1.2812	3.84491	0.000120597	0.000407613	120.159	3.14804	1.26814	2.48241	0.0130498	0.0265247	120.159	9.41412	1.6206	5.80905	6.28289e-09	6.76907e-08	14	59.87	969.17	6	24.77	13	60.93	36.37	50.66	1.71	0	0
Am_Rn_002068	F:GO:0003677; F:GO:0003723; F:GO:0004525; F:GO:0005524; P:GO:0006396; P:GO:0031047; P:GO:0051252; P:GO:0090502	F:DNA binding; F:RNA binding; F:ribonuclease III activity; F:ATP binding; P:RNA processing; P:gene silencing by RNA; P:regulation of RNA metabolic process; P:RNA phosphodiester bond hydrolysis, endonucleolytic	K11592	DICER1, DCR1; endoribonuclease Dicer [EC:3.1.26.-]	A 9160 Human Diseases; B 09161 Cancer: overview; C 05206 MicroRNAs in cancer [PATH:ko05206]	699.503	-0.352179	0.217137	-1.62192	0.104819	0.171232	699.503	0.301548	0.218113	1.38253	0.166809	0.245107	699.503	0.155706	0.217782	0.714963	0.474632	0.603353	416.26	794.53	560.85	873.7	866.41	1162.01	469.19	642.55	730.57	635.07	575.36	867.96
Am_Rn_108635	F:GO:0003735; C:GO:0005840; P:GO:0006412; P:GO:0042254	F:structural constituent of ribosome; C:ribosome; P:translation; P:ribosome biogenesis	K02894	RP-L23e, RPL23; large subunit ribosomal protein L23e	A 9120 Genetic Information Processing; B 09122 Translation; C 03010 Ribosome [PATH:ko03010]|A 9160 Human Diseases; B 09172 Infectious disease: viral; C 05171 Coronavirus disease - COVID-19 [PATH:ko05171]	28.5688	9.37747	2.48623	3.77176	0.0001621	0.00053465	28.5688	9.36858	2.48623	3.76819	0.000164438	0.00053263	28.5688	9.40954	2.48623	3.78466	0.000153919	0.00063079	49	103	136	0	0	0	0	0	0	0	0	0
Am_Rn_068332	F:GO:0003746; F:GO:0003924; F:GO:0005525; C:GO:0005840; P:GO:0006448	F:translation elongation factor activity; F:GTPase activity; F:GTP binding; C:ribosome; P:regulation of translational elongation	K03231	EEF1A; elongation factor 1-alpha	A 9120 Genetic Information Processing; B 09122 Translation; C 03013 Nucleocytoplasmic transport [PATH:ko03013]|A 9160 Human Diseases; B 09171 Infectious disease: bacterial; C 05134 Legionellosis [PATH:ko05134]|A 9160 Human Diseases; B 09174 Infectious disease: parasitic; C 05140 Leishmaniasis [PATH:ko05140]	391.745	-9.72742	2.01044	-4.83844	1.30859e-06	6.2724e-06	391.745	-9.99362	2.01031	-4.9712	6.65413e-07	3.48158e-06	391.745	-12.3372	2.00972	-6.13876	8.31678e-10	1.04833e-08	0	0	0	9.44	382.52	216.73	0	241.16	546.75	618.53	1386.09	1804.24
Am_Rn_063625	F:GO:0016491	F:oxidoreductase activity	K22374	DMAS1; 3''-deamino-3''-oxonicotianamine reductase [EC:1.1.1.285]	A 9100 Metabolism; B 09110 Biosynthesis of other secondary metabolites; C 00999 Biosynthesis of various plant secondary metabolites [PATH:ko00999]	1403.46	-12.6706	1.21808	-10.4021	2.42525e-25	9.97196e-24	1403.46	-10.4922	1.21842	-8.6113	7.22369e-18	1.99085e-16	1403.46	-12.2851	1.21811	-10.0854	6.40845e-24	5.77628e-22	0	1.49	0	3315.46	2202.1	3616.98	737.08	547.55	684.43	2525.82	1675.18	2926.27
Am_Rn_069174	C:GO:0016021	C:integral component of membrane	.	.	.	28.1823	9.35764	3.41641	2.73903	0.0061621	0.014251	28.1823	9.34876	3.41641	2.73643	0.00621102	0.0137472	28.1823	9.38972	3.41641	2.74842	0.00598838	0.0157429	3	19	259	0	0	0	0	0	0	0	0	0
Am_Rn_053073	.	.	.	.	.	582.116	-5.98006	1.72072	-3.47533	0.00051023	0.00150927	582.116	-9.7512	1.71431	-5.68811	1.28456e-08	9.21046e-08	582.116	-12.1184	1.7139	-7.07067	1.54188e-12	3.13013e-11	0	1	0	6	58.14	23	552.17	304.07	292	30	4909.5	1364.2
Am_Rn_036548	.	.	.	.	.	700.163	-1.03288	0.187502	-5.50864	3.61612e-08	2.2034e-07	700.163	-0.623018	0.188115	-3.3119	0.00092666	0.00252446	700.163	-0.483658	0.188274	-2.56891	0.0102019	0.0249295	294.38	486.85	394.49	965.08	1027.35	1084.92	607.53	880.88	834.32	560.98	757.12	836.92
Am_Rn_002116	F:GO:0004683; F:GO:0005509; F:GO:0005516; F:GO:0005524; C:GO:0005634; C:GO:0005737; P:GO:0009069; F:GO:0009931; P:GO:0018105; C:GO:0031226; P:GO:0035556; P:GO:0046777	F:calmodulin-dependent protein kinase activity; F:calcium ion binding; F:calmodulin binding; F:ATP binding; C:nucleus; C:cytoplasm; P:serine family amino acid metabolic process; F:calcium-dependent protein serine/threonine kinase activity; P:peptidyl-serine phosphorylation; C:intrinsic component of plasma membrane; P:intracellular signal transduction; P:protein autophosphorylation	K13412	CPK; calcium-dependent protein kinase [EC:2.7.11.1]	A 9150 Organismal Systems; B 09159 Environmental adaptation; C 04626 Plant-pathogen interaction [PATH:ko04626]|A 9160 Human Diseases; B 09174 Infectious disease: parasitic; C 05145 Toxoplasmosis [PATH:ko05145]	2637.69	0.49633	0.34026	1.45868	0.144653	0.225153	2637.69	0.413103	0.34024	1.21415	0.22469	0.3149	2637.69	0.435904	0.340233	1.28119	0.200127	0.306027	1857.59	2844.4	3550.92	3336.01	1674.28	2458.06	2359.32	2833.16	2728.65	3526.8	2445.79	1996.02
Am_Rn_027672	F:GO:0000062; C:GO:0005829; P:GO:0006869	F:fatty-acyl-CoA binding; C:cytosol; P:lipid transport	.	.	.	388.955	-0.357898	0.217775	-1.64343	0.100294	0.164987	388.955	-0.623618	0.217183	-2.87139	0.0040867	0.0094894	388.955	-0.101091	0.21838	-0.462911	0.643428	0.756067	205.46	287.6	301.3	361.61	402.46	560	413.53	533.12	636.14	282.75	379.84	460.54
Am_Rn_071823	.	.	.	.	.	28.1847	8.39179	2.07518	4.04389	5.25713e-05	0.000190735	28.1847	9.3447	2.07518	4.50308	6.69741e-06	2.89421e-05	28.1847	9.38566	2.07518	4.52282	6.10203e-06	3.53826e-05	57	34	185	1	0	0	0	0	0	0	0	0
Am_Rn_093836	F:GO:0003735; C:GO:0005840; P:GO:0006412; P:GO:0042254	F:structural constituent of ribosome; C:ribosome; P:translation; P:ribosome biogenesis	K02995	RP-S8e, RPS8; small subunit ribosomal protein S8e	A 9120 Genetic Information Processing; B 09122 Translation; C 03010 Ribosome [PATH:ko03010]|A 9160 Human Diseases; B 09172 Infectious disease: viral; C 05171 Coronavirus disease - COVID-19 [PATH:ko05171]	28.0827	9.35263	2.51028	3.72573	0.000194753	0.000631291	28.0827	9.34374	2.51028	3.72219	0.000197504	0.000627933	28.0827	9.3847	2.51028	3.7385	0.000185118	0.000741333	66	67	145	0	0	0	0	0	0	0	0	0
Am_Rn_060224	.	.	.	.	.	27.9273	9.34445	2.6407	3.53862	0.000402219	0.00121799	27.9273	9.33557	2.6407	3.53526	0.000407376	0.00120713	27.9273	9.37653	2.6407	3.55077	0.000384107	0.00141215	140.8	39.04	85.87	0	0	0	0	0	0	0	0	0
Am_Rn_099555	C:GO:0005840	C:ribosome	K02947	RP-S10e, RPS10; small subunit ribosomal protein S10e	A 9120 Genetic Information Processing; B 09122 Translation; C 03010 Ribosome [PATH:ko03010]|A 9160 Human Diseases; B 09172 Infectious disease: viral; C 05171 Coronavirus disease - COVID-19 [PATH:ko05171]	27.8248	9.33918	3.66295	2.54964	0.0107835	0.0234963	27.8248	9.3303	3.66295	2.54721	0.0108588	0.022549	27.8248	9.37126	3.66295	2.55839	0.0105157	0.0255513	1	12	264	0	0	0	0	0	0	0	0	0
Am_Rn_002147	F:GO:0004842; P:GO:0016567	F:ubiquitin-protein transferase activity; P:protein ubiquitination	K10590	TRIP12; E3 ubiquitin-protein ligase TRIP12 [EC:2.3.2.26]	A 9120 Genetic Information Processing; B 09123 Folding, sorting and degradation; C 04120 Ubiquitin mediated proteolysis [PATH:ko04120]	3873.39	0.380347	0.372513	1.02103	0.307241	0.419934	3873.39	0.76017	0.372582	2.04028	0.0413227	0.0731485	3873.39	0.681544	0.372558	1.82936	0.067345	0.124263	4735.95	3530.71	4457.02	4131.88	4146.05	4545.68	1378.03	4368.19	4438.28	2533.84	3827.09	4314.68
Am_Rn_065618	F:GO:0046872; F:GO:0051213	F:metal ion binding; F:dioxygenase activity	K05933	E1.14.17.4; aminocyclopropanecarboxylate oxidase [EC:1.14.17.4]	A 9100 Metabolism; B 09105 Amino acid metabolism; C 00270 Cysteine and methionine metabolism [PATH:ko00270]	2968.52	12.9074	0.784637	16.4502	8.36025e-61	2.93176e-58	2968.52	9.35064	0.481616	19.4151	5.7469e-84	1.59393e-80	2968.52	9.37006	0.480972	19.4815	1.57566e-84	5.12861e-81	12044	12203.1	5003.69	2	0	3	14.04	14.55	29.54	16.82	15	26.57
Am_Rn_038817	F:GO:0003885; C:GO:0016020; P:GO:0019852; F:GO:0050105; F:GO:0071949	F:D-arabinono-1,4-lactone oxidase activity; C:membrane; P:L-ascorbic acid metabolic process; F:L-gulonolactone oxidase activity; F:FAD binding	K00103	GULO; L-gulonolactone oxidase [EC:1.1.3.8]	A 9100 Metabolism; B 09101 Carbohydrate metabolism; C 00053 Ascorbate and aldarate metabolism [PATH:ko00053]	54.7468	10.287	1.64729	6.24482	4.24298e-10	3.42187e-09	54.7468	5.76127	1.22119	4.71776	2.38451e-06	1.12667e-05	54.7468	9.3573	1.64729	5.68042	1.34363e-08	1.36857e-07	116.07	145.96	272.01	0	0	0	7.84	0	4.17	1	0	0
Am_Rn_002171	P:GO:0006118; F:GO:0009916; C:GO:0016021; F:GO:0046872; C:GO:0070469; F:GO:0102721	P:obsolete electron transport; F:alternative oxidase activity; C:integral component of membrane; F:metal ion binding; C:respirasome; F:ubiquinol:oxygen oxidoreductase activity	K17893	AOX1, AOX2; ubiquinol oxidase [EC:1.10.3.11]	None	218.497	-0.878377	0.444858	-1.97451	0.0483236	0.0878609	218.497	-0.525214	0.445493	-1.17895	0.238418	0.330707	218.497	0.793364	0.449483	1.76506	0.0775537	0.139988	80.47	157.85	215.05	358.44	253.48	466.08	132.82	303.01	423.71	85.05	107.44	151.47
Am_Rn_051229	C:GO:0000506; P:GO:0006506; C:GO:0016021; F:GO:0017176	C:glycosylphosphatidylinositol-N-acetylglucosaminyltransferase (GPI-GnT) complex; P:GPI anchor biosynthetic process; C:integral component of membrane; F:phosphatidylinositol N-acetylglucosaminyltransferase activity	K03859	PIGC, GPI2; phosphatidylinositol N-acetylglucosaminyltransferase subunit C	A 9100 Metabolism; B 09107 Glycan biosynthesis and metabolism; C 00563 Glycosylphosphatidylinositol (GPI)-anchor biosynthesis [PATH:ko00563]	68.4978	10.3712	2.50627	4.13812	3.50163e-05	0.000131226	68.4978	2.56715	2.21606	1.15843	0.246687	0.340274	68.4978	4.8257	2.22998	2.16401	0.0304639	0.0637213	278.58	123.82	144.39	0	0	0	0	58.74	72.7	0	25.79	0
Am_Rn_115559	F:GO:0003735; C:GO:0005840; P:GO:0006412; F:GO:0019843; P:GO:0042254; F:GO:0046872	F:structural constituent of ribosome; C:ribosome; P:translation; F:rRNA binding; P:ribosome biogenesis; F:metal ion binding	K02922	RP-L37e, RPL37; large subunit ribosomal protein L37e	A 9120 Genetic Information Processing; B 09122 Translation; C 03010 Ribosome [PATH:ko03010]|A 9160 Human Diseases; B 09172 Infectious disease: viral; C 05171 Coronavirus disease - COVID-19 [PATH:ko05171]	27.5266	9.3238	2.45983	3.79043	0.000150388	0.000499097	27.5266	9.31491	2.45983	3.78681	0.000152591	0.000498329	27.5266	9.35587	2.45983	3.80347	0.000142685	0.000590204	66	83	125	0	0	0	0	0	0	0	0	0
Am_Rn_002186	C:GO:0000148; F:GO:0003843; P:GO:0005982; P:GO:0005985; P:GO:0006075; C:GO:0016021	C:1,3-beta-D-glucan synthase complex; F:1,3-beta-D-glucan synthase activity; P:starch metabolic process; P:sucrose metabolic process; P:(1->3)-beta-D-glucan biosynthetic process; C:integral component of membrane	K11000	CALS; callose synthase [EC:2.4.1.-]	None	1482.94	0.114862	0.992215	0.115764	0.90784	0.961611	1482.94	0.891903	0.992381	0.898751	0.368785	0.476023	1482.94	-0.419727	0.992141	-0.423052	0.672257	0.780141	1058.48	2341.09	583.03	1525.63	1563.81	1522.56	13.91	1362.54	1507.06	972.17	2642.28	3294.57
Am_Rn_068754	F:GO:0004345; P:GO:0006006; P:GO:0006098; P:GO:0006749; F:GO:0050661	F:glucose-6-phosphate dehydrogenase activity; P:glucose metabolic process; P:pentose-phosphate shunt; P:glutathione metabolic process; F:NADP binding	K15627	ASPSCR1, ASPL; tether containing UBX domain for GLUT4	A 9160 Human Diseases; B 09161 Cancer: overview; C 05202 Transcriptional misregulation in cancer [PATH:ko05202]	262.753	-0.10124	0.231396	-0.437519	0.661735	0.761701	262.753	-0.623691	0.229599	-2.71644	0.00659884	0.0144983	262.753	-0.274006	0.230587	-1.1883	0.234717	0.348229	207.57	197	133.47	224.67	206.15	329.42	334.77	340.06	398.3	292.68	283.6	287.85
Am_Rn_044179	F:GO:0004712; F:GO:0005524; P:GO:0006468	F:protein serine/threonine/tyrosine kinase activity; F:ATP binding; P:protein phosphorylation	K08287	E2.7.12.1; dual-specificity kinase [EC:2.7.12.1]	None	967.391	-1.32802	0.206363	-6.43534	1.23194e-10	1.07111e-09	967.391	-0.62513	0.207002	-3.01993	0.00252833	0.00618331	967.391	-0.131382	0.207591	-0.63289	0.526805	0.651506	397.72	596.98	579.94	1760.66	1298.54	2053.25	1072.18	974.68	1026.69	649.83	771.03	847.33
Am_Rn_002198	P:GO:0000398; C:GO:0005681	P:mRNA splicing, via spliceosome; C:spliceosomal complex	.	.	.	307.201	-0.159768	0.445437	-0.358676	0.719837	0.812727	307.201	-0.200814	0.445391	-0.450872	0.652082	0.731518	307.201	-0.169361	0.445364	-0.380276	0.70374	0.806643	293.56	237.13	154.7	255.68	451.97	286.53	203.21	440.68	408.28	272.69	511.66	243.65
Am_Rn_057421	.	.	.	.	.	77.7639	10.3601	3.47281	2.98319	0.00285258	0.00716408	77.7639	2.61242	3.26966	0.798989	0.424297	0.531548	77.7639	2.22459	3.26895	0.680522	0.496174	0.623067	0	84.88	483.22	0	0	0	0	15.46	115.2	0	0	164.22
Am_Rn_110755	F:GO:0003735; C:GO:0005840; P:GO:0006414; P:GO:0042254	F:structural constituent of ribosome; C:ribosome; P:translational elongation; P:ribosome biogenesis	K02943	RP-LP2, RPLP2; large subunit ribosomal protein LP2	A 9120 Genetic Information Processing; B 09122 Translation; C 03010 Ribosome [PATH:ko03010]|A 9160 Human Diseases; B 09172 Infectious disease: viral; C 05171 Coronavirus disease - COVID-19 [PATH:ko05171]	27.4435	9.31931	3.43203	2.71539	0.00661976	0.0151726	27.4435	9.31043	3.43203	2.7128	0.0066717	0.0146384	27.4435	9.35139	3.43203	2.72474	0.00643529	0.0167443	4	13	256	0	0	0	0	0	0	0	0	0
Am_Rn_002217	F:GO:0004849; F:GO:0005524; C:GO:0005741; C:GO:0005829; P:GO:0006206; P:GO:0006222; P:GO:0009737; C:GO:0016021; P:GO:0016310; F:GO:0016462; P:GO:1900055	F:uridine kinase activity; F:ATP binding; C:mitochondrial outer membrane; C:cytosol; P:pyrimidine nucleobase metabolic process; P:UMP biosynthetic process; P:response to abscisic acid; C:integral component of membrane; P:phosphorylation; F:pyrophosphatase activity; P:regulation of leaf senescence	K00876	udk, UCK; uridine kinase [EC:2.7.1.48]	A 9100 Metabolism; B 09104 Nucleotide metabolism; C 00240 Pyrimidine metabolism [PATH:ko00240]|A 9100 Metabolism; B 09111 Xenobiotics biodegradation and metabolism; C 00983 Drug metabolism - other enzymes [PATH:ko00983]	337.515	-0.781003	1.51557	-0.515319	0.60633	0.713347	337.515	0.192272	1.51597	0.126831	0.899074	0.934005	337.515	0.290046	1.516	0.191323	0.848273	0.917001	430.93	296.13	14.83	768.87	812.1	16.76	266.82	556.52	11.49	358.89	443.84	6.44
Am_Rn_002225	F:GO:0003676; C:GO:0005730; P:GO:0006397; C:GO:0032040	F:nucleic acid binding; C:nucleolus; P:mRNA processing; C:small-subunit processome	K14792	RRP5, PDCD11; rRNA biogenesis protein RRP5	None	982.919	0.325383	0.417437	0.77948	0.435697	0.553793	982.919	0.812011	0.417783	1.94362	0.0519412	0.0894236	982.919	-0.0186245	0.417242	-0.0446373	0.964396	1	1288.49	1076.73	486.55	843.66	1076.17	1065.27	386.87	852.54	939.62	962.91	1151.91	1776.88
Am_Rn_096069	.	.	.	.	.	234.221	-0.635223	0.250167	-2.53919	0.0111108	0.0241181	234.221	-0.625386	0.250238	-2.49916	0.0124487	0.0254442	234.221	-0.225286	0.251556	-0.895571	0.370482	0.499535	141.82	178.4	123.27	297.5	265.88	324.75	327.51	261.22	275.17	233.97	257.74	189.28
Am_Rn_067864	F:GO:0016787	F:hydrolase activity	.	.	.	13210.6	-14.4151	1.1558	-12.472	1.06179e-35	9.02343e-34	13210.6	-10.3913	1.1559	-8.98976	2.47761e-19	7.92343e-18	13210.6	-12.104	1.15582	-10.4722	1.15902e-25	1.24368e-23	0	4.79	0	51096.9	43148.5	38706.9	594.21	3265.02	4868.57	3352.98	21449.6	2603.5
Am_Rn_080637	C:GO:0005794; F:GO:0015120; F:GO:0015297; P:GO:0015713; C:GO:0016021; P:GO:0035436; F:GO:0071917	C:Golgi apparatus; F:phosphoglycerate transmembrane transporter activity; F:antiporter activity; P:phosphoglycerate transmembrane transport; C:integral component of membrane; P:triose phosphate transmembrane transport; F:triose-phosphate transmembrane transporter activity	K15283	SLC35E1; solute carrier family 35, member E1	None	27.5715	9.31104	2.57438	3.61681	0.000298253	0.000928881	27.5715	6.57106	2.41038	2.72615	0.00640787	0.0141276	27.5715	9.34312	2.57438	3.62927	0.000284222	0.00108242	190.69	34.39	29.38	0	0	0	0	0	3.65	0	0	0
Am_Rn_002260	F:GO:0008568; P:GO:0009451; C:GO:0016021; F:GO:0016787; P:GO:0051013	F:microtubule severing ATPase activity; P:RNA modification; C:integral component of membrane; F:hydrolase activity; P:microtubule severing	.	.	.	202.837	-0.117806	0.391782	-0.300692	0.763649	0.849461	202.837	0.00513857	0.392184	0.0131024	0.989546	1	202.837	-0.347335	0.391092	-0.888115	0.374479	0.504066	182.01	175.39	102.87	251.27	186.96	207.77	93.61	274.09	244.25	226.95	305.7	244.66
Am_Rn_035683	F:GO:0004017; F:GO:0005524; P:GO:0006144; P:GO:0016310; F:GO:0016787; P:GO:0046034; P:GO:0046940	F:adenylate kinase activity; F:ATP binding; P:purine nucleobase metabolic process; P:phosphorylation; F:hydrolase activity; P:ATP metabolic process; P:nucleoside monophosphate phosphorylation	K00939	adk, AK; adenylate kinase [EC:2.7.4.3]	A 9100 Metabolism; B 09104 Nucleotide metabolism; C 00230 Purine metabolism [PATH:ko00230]|A 9100 Metabolism; B 09108 Metabolism of cofactors and vitamins; C 00730 Thiamine metabolism [PATH:ko00730]	485.037	-0.281879	0.268939	-1.04811	0.294587	0.406107	485.037	-0.626863	0.268435	-2.33525	0.0195303	0.0378849	485.037	-0.0195953	0.269354	-0.0727493	0.942006	0.984099	219.72	376.94	423.3	487.61	532.49	569.31	621.15	676.4	706.97	352.14	597.76	401.34
Am_Rn_002274	C:GO:0000785; C:GO:0005634; P:GO:0006325; F:GO:0031491	C:chromatin; C:nucleus; P:chromatin organization; F:nucleosome binding	K17613	CABIN1; calcineurin-binding protein cabin-1	None	386.343	-0.760597	0.469142	-1.62125	0.104964	0.171459	386.343	-0.00799906	0.470126	-0.0170147	0.986425	0.998137	386.343	-0.702438	0.469163	-1.49721	0.134338	0.221059	219.06	311.34	195.75	490.01	562.02	522.27	100.62	448.33	424.76	309.98	603.63	642.83
Am_Rn_106534	F:GO:0005515; C:GO:0009522; C:GO:0009523; C:GO:0009535; P:GO:0009765; C:GO:0016021; F:GO:0016168; P:GO:0018298; F:GO:0046872	F:protein binding; C:photosystem I; C:photosystem II; C:chloroplast thylakoid membrane; P:photosynthesis, light harvesting; C:integral component of membrane; F:chlorophyll binding; P:obsolete protein-chromophore linkage; F:metal ion binding	K08912	LHCB1; light-harvesting complex II chlorophyll a/b binding protein 1	A 9100 Metabolism; B 09102 Energy metabolism; C 00196 Photosynthesis - antenna proteins [PATH:ko00196]	1567.13	-12.7061	3.5719	-3.55723	0.000374782	0.00114445	1567.13	-11.8273	3.57193	-3.31117	0.000929051	0.00253053	1567.13	-12.0165	3.57192	-3.36416	0.000767767	0.00260061	0	1.44	0	3179.57	5623.15	0	1363.83	3583.41	0	3205.14	2594.59	0
Am_Rn_002279	F:GO:0003723; F:GO:0003724; F:GO:0005524; C:GO:0005634; F:GO:0016787	F:RNA binding; F:RNA helicase activity; F:ATP binding; C:nucleus; F:hydrolase activity	K14442	DHX36, RHAU; ATP-dependent RNA helicase DHX36 [EC:3.6.4.13]	A 9120 Genetic Information Processing; B 09123 Folding, sorting and degradation; C 03018 RNA degradation [PATH:ko03018]	585.828	-0.0417731	0.67593	-0.0618008	0.950721	0.994226	585.828	-0.612933	0.675651	-0.907175	0.364314	0.471149	585.828	0.312373	0.676144	0.461992	0.644087	0.756501	308.13	502.18	536.91	289.23	256.16	1343.31	278.47	858.41	1639.15	332.74	356.99	742.55
Am_Rn_077841	F:GO:0008270; F:GO:0016491	F:zinc ion binding; F:oxidoreductase activity	K00083	CAD; cinnamyl-alcohol dehydrogenase [EC:1.1.1.195]	A 9100 Metabolism; B 09110 Biosynthesis of other secondary metabolites; C 00940 Phenylpropanoid biosynthesis [PATH:ko00940]	27.2623	9.30983	2.95174	3.15401	0.00161041	0.00427532	27.2623	9.30095	2.95174	3.151	0.0016271	0.00417117	27.2623	9.34191	2.95174	3.16488	0.00155146	0.00481277	20.4	39	212.55	0	0	0	0	0	0	0	0	0
Am_Rn_093074	F:GO:0003735; C:GO:0005840; P:GO:0006412; P:GO:0042254	F:structural constituent of ribosome; C:ribosome; P:translation; P:ribosome biogenesis	K02991	RP-S6e, RPS6; small subunit ribosomal protein S6e	A 9120 Genetic Information Processing; B 09122 Translation; C 03010 Ribosome [PATH:ko03010]|A 9130 Environmental Information Processing; B 09132 Signal transduction; C 04371 Apelin signaling pathway [PATH:ko04371]|A 9130 Environmental Information Processing; B 09132 Signal transduction; C 04066 HIF-1 signaling pathway [PATH:ko04066]|A 9130 Environmental Information Processing; B 09132 Signal tran…	27.1541	9.30045	1.78875	5.19941	1.99919e-07	1.08975e-06	27.1541	8.32977	1.78875	4.65675	3.21234e-06	1.47814e-05	27.1541	9.33252	1.78875	5.21734	1.81507e-07	1.46962e-06	60	70	139	0	0	0	0	0	1	0	0	0
Am_Rn_002299	.	.	.	.	.	236.235	0.0597947	0.975394	0.0613032	0.951118	0.994504	236.235	-0.533976	0.974834	-0.547761	0.583856	0.674143	236.235	-0.242208	0.975041	-0.248409	0.803818	0.885779	183.9	304.3	32.24	191.85	323.48	100.75	221.71	668.44	57.34	244.61	466.29	80.21
Am_Rn_072421	F:GO:0003735; C:GO:0005840; P:GO:0006412; P:GO:0042254	F:structural constituent of ribosome; C:ribosome; P:translation; P:ribosome biogenesis	K02930	RP-L4e, RPL4; large subunit ribosomal protein L4e	A 9120 Genetic Information Processing; B 09122 Translation; C 03010 Ribosome [PATH:ko03010]|A 9160 Human Diseases; B 09172 Infectious disease: viral; C 05171 Coronavirus disease - COVID-19 [PATH:ko05171]	26.841	9.2874	2.55043	3.6415	0.00027105	0.00085217	26.841	9.27851	2.55043	3.63802	0.000274742	0.000846551	26.841	9.31947	2.55043	3.65408	0.000258106	0.000993685	57	71	139	0	0	0	0	0	0	0	0	0
Am_Rn_002303	.	.	K10581	UBE2O; ubiquitin-conjugating enzyme E2 O [EC:2.3.2.24]	A 9120 Genetic Information Processing; B 09123 Folding, sorting and degradation; C 04120 Ubiquitin mediated proteolysis [PATH:ko04120]	426.502	-0.329749	0.333732	-0.988065	0.323121	0.437011	426.502	-0.0981366	0.334103	-0.293732	0.768963	0.829308	426.502	-0.161967	0.333924	-0.485041	0.627647	0.741904	429.16	335.77	174.49	463.04	534.62	552.28	455.8	420.25	423.46	459.34	483.74	466.04
Am_Rn_082432	P:GO:0000028; F:GO:0003735; P:GO:0006412; C:GO:0022627	P:ribosomal small subunit assembly; F:structural constituent of ribosome; P:translation; C:cytosolic small ribosomal subunit	K02998	RP-SAe, RPSA; small subunit ribosomal protein SAe	A 9120 Genetic Information Processing; B 09122 Translation; C 03010 Ribosome [PATH:ko03010]|A 9160 Human Diseases; B 09172 Infectious disease: viral; C 05171 Coronavirus disease - COVID-19 [PATH:ko05171]	26.9655	8.32405	1.65512	5.02929	4.92312e-07	2.52224e-06	26.9655	8.31517	1.65512	5.02392	5.06283e-07	2.70369e-06	26.9655	9.31792	1.65512	5.62977	1.80453e-08	1.79071e-07	58	54	153	1	0	0	0	0	1	0	0	0
Am_Rn_002309	F:GO:0005524; C:GO:0005634; C:GO:0005829	F:ATP binding; C:nucleus; C:cytosol	K09489	HSPA4; heat shock 70kDa protein 4	A 9140 Cellular Processes; B 09144 Cellular community - eukaryotes; C 04530 Tight junction [PATH:ko04530]|A 9150 Organismal Systems; B 09151 Immune system; C 04612 Antigen processing and presentation [PATH:ko04612]|A 9160 Human Diseases; B 09166 Cardiovascular disease; C 05417 Lipid and atherosclerosis [PATH:ko05417]	211.132	-0.833405	0.491595	-1.69531	0.0900167	0.150384	211.132	-0.539271	0.492196	-1.09564	0.273235	0.370528	211.132	-0.639543	0.491889	-1.30018	0.193539	0.297615	140.63	158.86	61.69	190.37	320.94	330.24	101.22	334.12	263.86	159.01	302.42	286.79
Am_Rn_053811	F:GO:0003962; P:GO:0006555; P:GO:0019346; F:GO:0030170	F:cystathionine gamma-synthase activity; P:methionine metabolic process; P:transsulfuration; F:pyridoxal phosphate binding	K01739	metB; cystathionine gamma-synthase [EC:2.5.1.48]	A 9100 Metabolism; B 09102 Energy metabolism; C 00920 Sulfur metabolism [PATH:ko00920]|A 9100 Metabolism; B 09105 Amino acid metabolism; C 00270 Cysteine and methionine metabolism [PATH:ko00270]|A 9100 Metabolism; B 09106 Metabolism of other amino acids; C 00450 Selenocompound metabolism [PATH:ko00450]	240.26	-6.63257	1.2893	-5.14434	2.68464e-07	1.43543e-06	240.26	-7.81498	1.28294	-6.09144	1.11898e-09	9.67016e-09	240.26	-11.9636	1.27812	-9.3603	7.95113e-21	5.21075e-19	0	0	0	19.3	26.85	24.93	51.77	76.37	30.27	683.83	1480.28	744.75
Am_Rn_047792	C:GO:0005886; P:GO:0010167; F:GO:0015112; P:GO:0015706; C:GO:0016021; P:GO:0046686; P:GO:0055085	C:plasma membrane; P:response to nitrate; F:nitrate transmembrane transporter activity; P:nitrate transmembrane transport; C:integral component of membrane; P:response to cadmium ion; P:transmembrane transport	.	.	.	100.216	11.1303	1.90496	5.84281	5.1326e-09	3.55807e-08	100.216	4.66966	1.5115	3.08942	0.00200546	0.00503037	100.216	9.31184	1.81305	5.136	2.80643e-07	2.18648e-06	1	266	713	0	0	0	17	13	18	0	1	1
Am_Rn_002316	F:GO:0003677; F:GO:0005516; P:GO:0007165; C:GO:0016021; F:GO:0016787; P:GO:0030001; F:GO:0043531; F:GO:0046872	F:DNA binding; F:calmodulin binding; P:signal transduction; C:integral component of membrane; F:hydrolase activity; P:metal ion transport; F:ADP binding; F:metal ion binding	.	.	.	526.647	0.0508467	0.461197	0.110249	0.912212	0.964969	526.647	0.968321	0.462271	2.0947	0.0361973	0.0651491	526.647	0.0681664	0.461181	0.147808	0.882494	0.94188	677.13	404.55	409.35	385.89	856.81	662.59	206.46	380.89	441.48	383.55	971.75	564.9
Am_Rn_073428	P:GO:0006470; F:GO:0008138; C:GO:0016021	P:protein dephosphorylation; F:protein tyrosine/serine/threonine phosphatase activity; C:integral component of membrane	.	.	.	270.885	-0.255884	0.171236	-1.49434	0.135088	0.212258	270.885	-0.629418	0.169662	-3.70983	0.000207396	0.000657485	270.885	-0.103517	0.171833	-0.602427	0.54689	0.670284	147.62	214.7	198.79	244.2	312.69	306.81	353.9	369.43	386.79	267.19	277.81	248.5
Am_Rn_069376	.	.	.	.	.	26.7188	9.27658	1.76302	5.26174	1.42695e-07	7.92697e-07	26.7188	8.3059	1.76302	4.71117	2.46302e-06	1.16197e-05	26.7188	9.30865	1.76302	5.27994	1.29229e-07	1.07822e-06	113.61	90.64	55.87	0	0	0	0	1	0	0	0	0
Am_Rn_086256	F:GO:0005198; P:GO:0009555; F:GO:0051536; P:GO:0097428	F:structural molecule activity; P:pollen development; F:iron-sulfur cluster binding; P:protein maturation by iron-sulfur cluster transfer	.	.	.	1455.72	0.215616	0.276185	0.780695	0.434982	0.552976	1455.72	-0.631906	0.275742	-2.29166	0.0219255	0.0419231	1455.72	0.190793	0.276143	0.690921	0.489615	0.617266	792.79	1152.42	1449.16	1248.32	1118.65	1400.68	2588.29	1969.01	2042.42	1160.47	1101.75	1662.21
Am_Rn_023715	F:GO:0003676; F:GO:0008270	F:nucleic acid binding; F:zinc ion binding	.	.	.	222.989	-4.89155	1.35967	-3.5976	0.000321165	0.00099305	222.989	-6.11188	1.33903	-4.56441	5.00912e-06	2.21611e-05	222.989	-11.9329	1.32334	-9.01725	1.92875e-19	1.06605e-17	0	0	0	5.13	10.57	5.42	7.09	16.91	26.77	1194.59	1190.23	446.81
Am_Rn_002338	F:GO:0003676; P:GO:0015074	F:nucleic acid binding; P:DNA integration	K13217	PRPF39, PRP39; pre-mRNA-processing factor 39	None	385.939	-0.358823	0.613456	-0.58492	0.558601	0.669983	385.939	0.150453	0.614001	0.245038	0.806427	0.860796	385.939	-0.577074	0.613254	-0.941003	0.346703	0.474528	178.93	423.03	238.14	270.73	705.48	369.94	118.79	626.3	232	365.19	785.1	465.37
Am_Rn_081435	P:GO:0009686; P:GO:0045487; F:GO:0046872; F:GO:0052634	P:gibberellin biosynthetic process; P:gibberellin catabolic process; F:metal ion binding; F:C-19 gibberellin 2-beta-dioxygenase activity	K04125	GA2ox; gibberellin 2beta-dioxygenase [EC:1.14.11.13]	A 9100 Metabolism; B 09109 Metabolism of terpenoids and polyketides; C 00904 Diterpenoid biosynthesis [PATH:ko00904]	32.054	5.61447	1.29886	4.32261	1.54195e-05	6.14302e-05	32.054	2.24519	1.18813	1.88969	0.0587991	0.0995506	32.054	9.27564	1.66414	5.57382	2.49212e-08	2.40938e-07	51.51	12.18	190.3	3.08	0	4.29	13.71	26.76	30.6	0	0	0
Am_Rn_002343	.	.	.	.	.	322.361	0.253916	0.455378	0.557594	0.577122	0.68693	322.361	0.71183	0.456173	1.56044	0.118656	0.183055	322.361	0.550821	0.455787	1.2085	0.226854	0.338846	544.6	180.95	256.1	306.06	399.13	406.51	160.16	312	352.06	255.19	315.81	353.5
Am_Rn_124979	F:GO:0003735; C:GO:0005840; P:GO:0006412; P:GO:0042254	F:structural constituent of ribosome; C:ribosome; P:translation; P:ribosome biogenesis	K02983	RP-S30e, RPS30; small subunit ribosomal protein S30e	A 9120 Genetic Information Processing; B 09122 Translation; C 03010 Ribosome [PATH:ko03010]|A 9160 Human Diseases; B 09172 Infectious disease: viral; C 05171 Coronavirus disease - COVID-19 [PATH:ko05171]	25.9583	9.23908	3.26061	2.83354	0.00460354	0.0110001	25.9583	9.2302	3.26061	2.83082	0.00464295	0.0106073	25.9583	9.27116	3.26061	2.84338	0.00446381	0.0121833	7	24	228	0	0	0	0	0	0	0	0	0
Am_Rn_002370	C:GO:0005739; F:GO:0008270; F:GO:0008568; P:GO:0009451; F:GO:0016787; P:GO:0051013	C:mitochondrion; F:zinc ion binding; F:microtubule severing ATPase activity; P:RNA modification; F:hydrolase activity; P:microtubule severing	.	.	.	644.538	0.0861628	0.374029	0.230364	0.817809	0.892908	644.538	0.502991	0.374448	1.34329	0.179179	0.260635	644.538	0.4487	0.374336	1.19866	0.230662	0.343379	956.1	526.8	358.73	774.73	705.63	828.03	579	592.94	532.38	570.46	685.74	577.39
Am_Rn_002374	C:GO:0000148; F:GO:0003843; P:GO:0005982; P:GO:0005985; P:GO:0006075; C:GO:0016021	C:1,3-beta-D-glucan synthase complex; F:1,3-beta-D-glucan synthase activity; P:starch metabolic process; P:sucrose metabolic process; P:(1->3)-beta-D-glucan biosynthetic process; C:integral component of membrane	K11000	CALS; callose synthase [EC:2.4.1.-]	None	804.042	1.36348	1.58065	0.862607	0.388354	0.506748	804.042	2.42228	1.58099	1.53213	0.125491	0.19216	804.042	1.878	1.58077	1.18803	0.234823	0.348349	1359.95	1420.92	1528.78	724.53	877.41	536.34	0	733.54	365.69	0.89	745.37	825.57
Am_Rn_002378	C:GO:0000148; F:GO:0003843; P:GO:0005982; P:GO:0005985; P:GO:0006075; C:GO:0016021	C:1,3-beta-D-glucan synthase complex; F:1,3-beta-D-glucan synthase activity; P:starch metabolic process; P:sucrose metabolic process; P:(1->3)-beta-D-glucan biosynthetic process; C:integral component of membrane	K11000	CALS; callose synthase [EC:2.4.1.-]	None	850.059	1.11397	0.692731	1.60809	0.107816	0.175413	850.059	0.2663	0.692273	0.384675	0.700478	0.772377	850.059	-0.256828	0.692081	-0.371095	0.710567	0.811625	975.21	1187.65	264.55	328.25	730.81	367.98	252.08	1241.97	1221.83	622.98	1127.16	2116.13
Am_Rn_094428	F:GO:0003723; F:GO:0003735; P:GO:0006412; C:GO:0015934; C:GO:0016021; P:GO:0042254; F:GO:0046872	F:RNA binding; F:structural constituent of ribosome; P:translation; C:large ribosomal subunit; C:integral component of membrane; P:ribosome biogenesis; F:metal ion binding	K02865	RP-L10Ae, RPL10A; large subunit ribosomal protein L10Ae	A 9120 Genetic Information Processing; B 09122 Translation; C 03010 Ribosome [PATH:ko03010]|A 9160 Human Diseases; B 09172 Infectious disease: viral; C 05171 Coronavirus disease - COVID-19 [PATH:ko05171]	25.7537	9.22389	1.91066	4.82759	1.38195e-06	6.60017e-06	25.7537	8.25321	1.91066	4.31956	1.56343e-05	6.2927e-05	25.7537	9.25596	1.91066	4.84438	1.27009e-06	8.60059e-06	46	64	145.61	0	0	0	0	0	1	0	0	0
Am_Rn_073585	C:GO:0005576; P:GO:0019953	C:extracellular region; P:sexual reproduction	.	.	.	39787.5	13.791	1.26307	10.9186	9.38892e-28	4.59786e-26	39787.5	14.2105	1.27103	11.1803	5.09461e-29	4.63975e-27	39787.5	9.25331	1.24089	7.45701	8.8505e-14	2.17141e-12	194277	46064	137717	26.55	6.64	0	14.77	9.62	0	338.29	72.69	450.66
Am_Rn_002386	F:GO:0003677; P:GO:0007165; C:GO:0016020; F:GO:0043531	F:DNA binding; P:signal transduction; C:membrane; F:ADP binding	.	.	.	200.599	-0.486979	0.659348	-0.738576	0.460164	0.577648	200.599	-0.028179	0.660251	-0.0426792	0.965957	0.98333	200.599	-0.941868	0.658672	-1.42995	0.152732	0.24524	58.61	285.83	47.5	140.88	340.3	189.06	78.19	187.4	243.07	254.13	377.48	316.86
Am_Rn_058548	C:GO:0005774; C:GO:0005783; C:GO:0005794; C:GO:0016021	C:vacuolar membrane; C:endoplasmic reticulum; C:Golgi apparatus; C:integral component of membrane	.	.	.	1380.52	-0.229895	0.282206	-0.814636	0.41528	0.533667	1380.52	-0.634764	0.281998	-2.25095	0.0243887	0.0460529	1380.52	-0.230601	0.282184	-0.8172	0.413814	0.543921	496.91	1207.67	1151.8	1372.69	1205.09	1698.54	1307	2075.76	2311.48	1309.08	1497.09	1542.34
Am_Rn_002396	.	.	K19825	DBR; 2-alkenal reductase (NADP+) [EC:1.3.1.102]	None	469.185	-0.281355	0.519271	-0.541827	0.587938	0.696922	469.185	-0.53357	0.519052	-1.02797	0.303964	0.405192	469.185	-0.627059	0.518938	-1.20835	0.226912	0.338899	199.38	136.86	550.25	355.52	529.02	527.63	501.26	571.77	595.73	414.97	917.77	489.93
Am_Rn_076938	P:GO:0009416; C:GO:0009522; C:GO:0009523; C:GO:0009535; P:GO:0009768; C:GO:0009941; C:GO:0010287; C:GO:0016021; F:GO:0016168; P:GO:0018298	P:response to light stimulus; C:photosystem I; C:photosystem II; C:chloroplast thylakoid membrane; P:photosynthesis, light harvesting in photosystem I; C:chloroplast envelope; C:plastoglobule; C:integral component of membrane; F:chlorophyll binding; P:obsolete protein-chromophore linkage	K08912	LHCB1; light-harvesting complex II chlorophyll a/b binding protein 1	A 9100 Metabolism; B 09102 Energy metabolism; C 00196 Photosynthesis - antenna proteins [PATH:ko00196]	594.701	-10.6928	1.42876	-7.48399	7.21012e-14	9.498e-13	594.701	-12.4372	1.42833	-8.70753	3.10575e-18	8.93056e-17	594.701	-11.7685	1.42843	-8.2388	1.73939e-16	6.32181e-15	0	0	0	39	624	544	1135	1236	1600	1208	533	804
Am_Rn_002408	F:GO:0046872	F:metal ion binding	.	.	.	176.596	-0.570842	0.433414	-1.31708	0.187811	0.279317	176.596	0.643084	0.437383	1.4703	0.141481	0.212906	176.596	-0.0622687	0.434567	-0.143289	0.886062	0.944552	183.48	155.03	77.83	265.44	271.44	270.23	55.77	160.29	141.37	179.73	245.55	152.55
Am_Rn_002413	F:GO:0001055; F:GO:0003677; C:GO:0005665; P:GO:0006366	F:RNA polymerase II activity; F:DNA binding; C:RNA polymerase II, core complex; P:transcription by RNA polymerase II	K03006	RPB1, POLR2A; DNA-directed RNA polymerase II subunit RPB1 [EC:2.7.7.6]	A 9120 Genetic Information Processing; B 09121 Transcription; C 03020 RNA polymerase [PATH:ko03020]|A 9160 Human Diseases; B 09164 Neurodegenerative disease; C 05016 Huntington disease [PATH:ko05016]	678.154	0.405333	1.02704	0.394661	0.693093	0.789633	678.154	1.60098	1.02754	1.55806	0.119218	0.1838	678.154	1.30415	1.02735	1.26943	0.204288	0.311298	1345.61	658.62	618.75	952.77	934.77	720.94	3.38	609.55	616.75	297.73	472.86	688.47
Am_Rn_118950	F:GO:0003735; C:GO:0005840; P:GO:0006412; P:GO:0042254	F:structural constituent of ribosome; C:ribosome; P:translation; P:ribosome biogenesis	K02905	RP-L29e, RPL29; large subunit ribosomal protein L29e	A 9120 Genetic Information Processing; B 09122 Translation; C 03010 Ribosome [PATH:ko03010]|A 9160 Human Diseases; B 09172 Infectious disease: viral; C 05171 Coronavirus disease - COVID-19 [PATH:ko05171]	25.4374	9.20989	2.58067	3.5688	0.000358626	0.00109897	25.4374	9.201	2.58067	3.56535	0.000363368	0.00108953	25.4374	9.24196	2.58067	3.58122	0.000341988	0.00127393	61	64	127	0	0	0	0	0	0	0	0	0
Am_Rn_080521	C:GO:0016020; F:GO:0016787	C:membrane; F:hydrolase activity	K01166	RNASET2; ribonuclease T2 [EC:4.6.1.19]	None	621.907	5.48414	1.48304	3.6979	0.000217388	0.000697181	621.907	-4.55487	1.38318	-3.29304	0.000991111	0.00267899	621.907	9.23742	1.81672	5.08466	3.68282e-07	2.79205e-06	173.82	5	55	0	7	0	1347.74	3513.07	2967.42	0	0	0
Am_Rn_090052	C:GO:0016021	C:integral component of membrane	.	.	.	317.953	12.8491	1.3144	9.77566	1.43219e-22	4.60429e-21	317.953	9.35258	0.822009	11.3777	5.39966e-30	5.36607e-28	317.953	9.21912	0.798753	11.5419	8.11133e-31	1.38955e-28	687.39	1589.36	946.13	0	0	0	5	0	1	1	3	3
Am_Rn_103935	.	.	.	.	.	23.9979	9.12101	3.95084	2.30862	0.0209644	0.0423638	23.9979	9.11213	3.95084	2.30638	0.0210897	0.0405435	23.9979	8.1913	3.95084	2.0733	0.038144	0.0768889	0	8	230	0	0	0	0	0	0	1	0	0
Am_Rn_002432	F:GO:0000149; F:GO:0003899; C:GO:0005730; P:GO:0006144; P:GO:0006206; P:GO:0006351; C:GO:0016021; P:GO:0035493	F:SNARE binding; F:DNA-directed 5'-3' RNA polymerase activity; C:nucleolus; P:purine nucleobase metabolic process; P:pyrimidine nucleobase metabolic process; P:DNA-templated transcription; C:integral component of membrane; P:SNARE complex assembly	.	.	.	464.379	-0.630505	0.480684	-1.31168	0.189627	0.281538	464.379	-0.136814	0.481116	-0.284367	0.776129	0.835176	464.379	0.448476	0.481774	0.930885	0.351913	0.479954	253.22	325.07	477.54	599.55	726.71	789.97	142.62	776.7	637.89	296.82	396.95	325.85
Am_Rn_031959	P:GO:0000266; F:GO:0004674; C:GO:0005634; P:GO:0009069; C:GO:0009569; P:GO:0009859; P:GO:0016559; F:GO:0019887; F:GO:0019900; P:GO:0042149; P:GO:0045859; P:GO:0046777; F:GO:1901982; P:GO:2000377	P:mitochondrial fission; F:protein serine/threonine kinase activity; C:nucleus; P:serine family amino acid metabolic process; C:chloroplast starch grain; P:pollen hydration; P:peroxisome fission; F:protein kinase regulator activity; F:kinase binding; P:cellular response to glucose starvation; P:regulation of protein kinase activity; P:protein autophosphorylation; F:maltose binding; P:regulation o…	.	.	.	411.299	-0.412011	0.238675	-1.72624	0.0843037	0.142101	411.299	-0.635321	0.238231	-2.66683	0.00765714	0.0165506	411.299	-0.427104	0.238562	-1.79033	0.0734011	0.13359	297.28	241.81	234.44	440.12	468.54	429.1	431.08	590.08	548.88	351.88	469.71	572.24
Am_Rn_023849	C:GO:0005829; P:GO:0007165; P:GO:0043666	C:cytosol; P:signal transduction; P:regulation of phosphoprotein phosphatase activity	K17607	TIPRL, TIP41; type 2A phosphatase activator TIP41	A 9140 Cellular Processes; B 09141 Transport and catabolism; C 04138 Autophagy - yeast [PATH:ko04138]	269.857	-0.532883	0.252929	-2.10685	0.0351309	0.0667627	269.857	-0.637606	0.252654	-2.52363	0.011615	0.0239255	269.857	-0.440094	0.253107	-1.73877	0.0820758	0.146666	107.51	220.13	180.18	327.19	259.83	352.02	360.43	288.98	342.38	314.58	285.91	296.26
Am_Rn_096904	F:GO:0003723; F:GO:0003735; P:GO:0006412; C:GO:0015934; P:GO:0042254	F:RNA binding; F:structural constituent of ribosome; P:translation; C:large ribosomal subunit; P:ribosome biogenesis	K02938	RP-L8e, RPL8; large subunit ribosomal protein L8e	A 9120 Genetic Information Processing; B 09122 Translation; C 03010 Ribosome [PATH:ko03010]|A 9160 Human Diseases; B 09172 Infectious disease: viral; C 05171 Coronavirus disease - COVID-19 [PATH:ko05171]	24.9021	9.17919	2.59747	3.5339	0.00040947	0.0012386	24.9021	9.17031	2.59747	3.53048	0.000414802	0.00122652	24.9021	9.21127	2.59747	3.54625	0.000390753	0.0014332	64.31	60.3	121.86	0	0	0	0	0	0	0	0	0
Am_Rn_120305	F:GO:0003735; P:GO:0006412; C:GO:0015934; P:GO:0042254; F:GO:0097367; P:GO:1901135	F:structural constituent of ribosome; P:translation; C:large ribosomal subunit; P:ribosome biogenesis; F:carbohydrate derivative binding; P:carbohydrate derivative metabolic process	K02900	RP-L27Ae, RPL27A; large subunit ribosomal protein L27Ae	A 9120 Genetic Information Processing; B 09122 Translation; C 03010 Ribosome [PATH:ko03010]|A 9160 Human Diseases; B 09172 Infectious disease: viral; C 05171 Coronavirus disease - COVID-19 [PATH:ko05171]	24.6774	9.16207	1.84678	4.9611	7.00945e-07	3.49659e-06	24.6774	8.19139	1.84678	4.4355	9.18609e-06	3.86998e-05	24.6774	9.19414	1.84678	4.97847	6.40892e-07	4.63334e-06	56	61	127	0	0	0	0	0	1	0	0	0
Am_Rn_001158	F:GO:0004518; P:GO:0006281	F:nuclease activity; P:DNA repair	.	.	.	721.74	-11.546	1.31829	-8.75831	1.98191e-18	4.30364e-17	721.74	-12.6828	1.31809	-9.62205	6.45341e-22	2.82884e-20	721.74	-11.7351	1.31824	-8.9021	5.48e-19	2.82967e-17	0	0	0	355.04	1156.07	609.13	588.03	2056.86	2234.28	532.82	965.29	1002.13
Am_Rn_002461	F:GO:0004842; P:GO:0006904; F:GO:0008168; P:GO:0016567; P:GO:0032259	F:ubiquitin-protein transferase activity; P:vesicle docking involved in exocytosis; F:methyltransferase activity; P:protein ubiquitination; P:methylation	.	.	.	687.876	-0.381458	0.159349	-2.39386	0.0166722	0.034588	687.876	-0.072746	0.160012	-0.454629	0.649376	0.729072	687.876	-0.426432	0.159203	-2.67854	0.00739435	0.0188455	416.31	507.86	533.19	692.02	873.59	889.96	528.81	725.12	729.81	714.84	942.73	930.02
Am_Rn_086349	F:GO:0003924; F:GO:0005525; C:GO:0005634; P:GO:0006913; P:GO:0015031	F:GTPase activity; F:GTP binding; C:nucleus; P:nucleocytoplasmic transport; P:protein transport	K07936	RAN; GTP-binding nuclear protein Ran	A 9120 Genetic Information Processing; B 09122 Translation; C 03013 Nucleocytoplasmic transport [PATH:ko03013]|A 9120 Genetic Information Processing; B 09122 Translation; C 03008 Ribosome biogenesis in eukaryotes [PATH:ko03008]|A 9160 Human Diseases; B 09172 Infectious disease: viral; C 05166 Human T-cell leukemia virus 1 infection [PATH:ko05166]	24.6188	8.19166	2.49151	3.28783	0.00100963	0.00279822	24.6188	8.18277	2.49151	3.28426	0.00102249	0.00275187	24.6188	9.18553	2.49151	3.68673	0.000227153	0.000889364	2	17	225	1	0	0	0	1	0	0	0	0
Am_Rn_002468	P:GO:0000103; F:GO:0004020; F:GO:0005524; P:GO:0006144; P:GO:0016310; P:GO:0070814	P:sulfate assimilation; F:adenylylsulfate kinase activity; F:ATP binding; P:purine nucleobase metabolic process; P:phosphorylation; P:hydrogen sulfide biosynthetic process	K00860	cysC; adenylylsulfate kinase [EC:2.7.1.25]	A 9100 Metabolism; B 09102 Energy metabolism; C 00920 Sulfur metabolism [PATH:ko00920]|A 9100 Metabolism; B 09104 Nucleotide metabolism; C 00230 Purine metabolism [PATH:ko00230]	197.209	-0.52554	0.597179	-0.880038	0.378839	0.496477	197.209	-0.888997	0.596641	-1.49	0.136223	0.206235	197.209	0.153876	0.598574	0.257071	0.797124	0.880803	39.5	131.68	212.93	103.14	209.27	417.69	346.12	259.6	277.03	166.4	164.68	115.79
Am_Rn_057500	F:GO:0003950	F:NAD+ ADP-ribosyltransferase activity	.	.	.	1839.53	11.1375	0.887562	12.5485	4.05333e-36	3.56377e-34	1839.53	9.7675	0.81628	11.9659	5.363e-33	6.8175e-31	1839.53	9.17937	0.799179	11.486	1.55129e-30	2.61169e-28	8176.72	7935.31	1973.32	0	2	9	3	10	15	8	8.77	25
Am_Rn_002474	F:GO:0003677; C:GO:0005634; P:GO:0006351; P:GO:0006355	F:DNA binding; C:nucleus; P:DNA-templated transcription; P:regulation of DNA-templated transcription	.	.	.	341.448	-0.549207	0.463238	-1.18558	0.235787	0.337535	341.448	0.0051082	0.464112	0.0110064	0.991218	1	341.448	-0.784251	0.462926	-1.69412	0.090243	0.158688	240.98	333.28	85.57	377.44	382.08	488.33	142.78	353.28	370.07	379.58	512.69	603.15
Am_Rn_025581	F:GO:0004575; C:GO:0005775; P:GO:0005982; P:GO:0005985; C:GO:0016021; C:GO:0017177	F:sucrose alpha-glucosidase activity; C:vacuolar lumen; P:starch metabolic process; P:sucrose metabolic process; C:integral component of membrane; C:glucosidase II complex	K01193	INV, sacA; beta-fructofuranosidase [EC:3.2.1.26]	A 9100 Metabolism; B 09101 Carbohydrate metabolism; C 00052 Galactose metabolism [PATH:ko00052]|A 9100 Metabolism; B 09101 Carbohydrate metabolism; C 00500 Starch and sucrose metabolism [PATH:ko00500]	941.312	-11.9954	1.38571	-8.65655	4.8627e-18	1.01475e-16	941.312	-13.2071	1.38556	-9.53196	1.54335e-21	6.52163e-20	941.312	-11.723	1.38575	-8.45966	2.68166e-17	1.09106e-15	0	0	0	1253.63	894.18	718.71	1493.7	2550.14	2819.86	881.34	1419.79	136.98
Am_Rn_093668	C:GO:0005840; P:GO:0042254; C:GO:1990904	C:ribosome; P:ribosome biogenesis; C:ribonucleoprotein complex	K02936	RP-L7Ae, RPL7A; large subunit ribosomal protein L7Ae	A 9120 Genetic Information Processing; B 09122 Translation; C 03010 Ribosome [PATH:ko03010]|A 9160 Human Diseases; B 09172 Infectious disease: viral; C 05171 Coronavirus disease - COVID-19 [PATH:ko05171]	24.3837	9.14484	1.89663	4.82163	1.42392e-06	6.79319e-06	24.3837	8.17416	1.89663	4.30983	1.63377e-05	6.54988e-05	24.3837	9.17691	1.89663	4.83854	1.30798e-06	8.83262e-06	44	68	131	0	0	0	0	0	1	0	0	0
Am_Rn_002490	F:GO:0003676; P:GO:0015074	F:nucleic acid binding; P:DNA integration	K14298	RAE1, GLE2; mRNA export factor	A 9120 Genetic Information Processing; B 09122 Translation; C 03013 Nucleocytoplasmic transport [PATH:ko03013]|A 9160 Human Diseases; B 09172 Infectious disease: viral; C 05164 Influenza A [PATH:ko05164]|A 9160 Human Diseases; B 09164 Neurodegenerative disease; C 05014 Amyotrophic lateral sclerosis [PATH:ko05014]	574.552	-2.70073	2.76952	-0.975161	0.32948	0.444037	574.552	-0.313576	2.76984	-0.113211	0.909863	0.942325	574.552	0.571001	2.77015	0.206126	0.836692	0.908206	16.14	598.18	46.13	2109.33	1817.56	1048.52	0	1004.4	0	6.99	525.48	0
Am_Rn_021300	P:GO:0006855; F:GO:0015297; C:GO:0016021; F:GO:0042910	P:xenobiotic transmembrane transport; F:antiporter activity; C:integral component of membrane; F:xenobiotic transmembrane transporter activity	K03327	TC.MATE, SLC47A, norM, mdtK, dinF; multidrug resistance protein, MATE family	None	737.202	11.5945	1.05883	10.9504	6.61808e-28	3.28311e-26	737.202	7.73743	0.696947	11.1019	1.22824e-28	1.08302e-26	737.202	9.1559	0.749334	12.2187	2.46959e-34	5.43942e-32	1341.46	1650.9	4287.31	2.91	0	0	15.52	20.46	7.21	3.21	3.62	10.48
Am_Rn_002502	F:GO:0046872	F:metal ion binding	.	.	.	457.827	-0.52438	0.404767	-1.29551	0.195145	0.288369	457.827	0.159991	0.405713	0.394345	0.693326	0.766985	457.827	-0.741585	0.404522	-1.83324	0.066767	0.123344	258	429.92	232.86	424.6	559.7	727.13	149.33	508.82	425.09	469.29	725.41	823.32
Am_Rn_078699	.	.	.	.	.	514.878	-0.492528	0.228147	-2.15882	0.0308639	0.0595176	514.878	-0.637752	0.227914	-2.79821	0.00513865	0.0115992	514.878	-0.474594	0.228114	-2.08051	0.0374784	0.0758317	304.83	334.9	314.26	559.11	533.88	650.64	704.83	554.01	627.97	641.58	648.87	458.28
Am_Rn_044021	P:GO:0006511; C:GO:0016021; P:GO:0016567; F:GO:0016874; F:GO:0061630	P:ubiquitin-dependent protein catabolic process; C:integral component of membrane; P:protein ubiquitination; F:ligase activity; F:ubiquitin protein ligase activity	K10601	SYVN1, HRD1; E3 ubiquitin-protein ligase synoviolin [EC:2.3.2.27]	A 9120 Genetic Information Processing; B 09123 Folding, sorting and degradation; C 04141 Protein processing in endoplasmic reticulum [PATH:ko04141]|A 9120 Genetic Information Processing; B 09123 Folding, sorting and degradation; C 04120 Ubiquitin mediated proteolysis [PATH:ko04120]	484.098	0.236554	0.231403	1.02226	0.306657	0.419317	484.098	-0.63817	0.229729	-2.77793	0.00547065	0.0122688	484.098	0.100785	0.230987	0.436325	0.662601	0.771932	381.63	440.83	285.63	316.7	430.94	477.27	687.3	798.27	729.74	351.37	499.68	519.12
Am_Rn_041336	F:GO:0046872; F:GO:0051213	F:metal ion binding; F:dioxygenase activity	K05933	E1.14.17.4; aminocyclopropanecarboxylate oxidase [EC:1.14.17.4]	A 9100 Metabolism; B 09105 Amino acid metabolism; C 00270 Cysteine and methionine metabolism [PATH:ko00270]	174.99	11.9823	1.44046	8.31839	8.91693e-17	1.6251e-15	174.99	7.63339	0.934818	8.16565	3.19718e-16	7.18282e-15	174.99	9.15321	1.09837	8.33344	7.85293e-17	3.01499e-15	846.05	636.89	213.31	0	0	0	3.96	6.45	1.46	3.18	0	1.43
Am_Rn_086228	C:GO:0005576; P:GO:0005975; P:GO:0006508; F:GO:0030248	C:extracellular region; P:carbohydrate metabolic process; P:proteolysis; F:cellulose binding	.	.	.	23.8451	9.11668	2.63915	3.45441	0.000551508	0.00161866	23.8451	9.10779	2.63915	3.45104	0.000558435	0.00159974	23.8451	9.14875	2.63915	3.46656	0.000527168	0.00186575	46	77	116	0	0	0	0	0	0	0	0	0
Am_Rn_112247	C:GO:0005840	C:ribosome	K02975	RP-S25e, RPS25; small subunit ribosomal protein S25e	A 9120 Genetic Information Processing; B 09122 Translation; C 03010 Ribosome [PATH:ko03010]|A 9160 Human Diseases; B 09172 Infectious disease: viral; C 05171 Coronavirus disease - COVID-19 [PATH:ko05171]	23.7711	9.11213	2.63457	3.45868	0.000542824	0.00159609	23.7711	9.10325	2.63457	3.45531	0.00054966	0.00157757	23.7711	9.14421	2.63457	3.47086	0.0005188	0.00184059	61	59	115	0	0	0	0	0	0	0	0	0
Am_Rn_064386	F:GO:0003962; P:GO:0006555; P:GO:0019346; F:GO:0030170	F:cystathionine gamma-synthase activity; P:methionine metabolic process; P:transsulfuration; F:pyridoxal phosphate binding	K01739	metB; cystathionine gamma-synthase [EC:2.5.1.48]	A 9100 Metabolism; B 09102 Energy metabolism; C 00920 Sulfur metabolism [PATH:ko00920]|A 9100 Metabolism; B 09105 Amino acid metabolism; C 00270 Cysteine and methionine metabolism [PATH:ko00270]|A 9100 Metabolism; B 09106 Metabolism of other amino acids; C 00450 Selenocompound metabolism [PATH:ko00450]	768.781	-7.44059	1.11575	-6.66867	2.58126e-11	2.4518e-10	768.781	-8.08731	1.11501	-7.25312	4.07275e-13	5.94809e-12	768.781	-11.7209	1.11377	-10.5236	6.72189e-26	7.40268e-24	0	0	1.72	220.71	120.86	97.48	144.66	225.31	348.99	2119.21	3078.73	3759.28
Am_Rn_034304	C:GO:0016021	C:integral component of membrane	K15015	SLC32A, VGAT; solute carrier family 32 (vesicular inhibitory amino acid transporter)	A 9150 Organismal Systems; B 09156 Nervous system; C 04727 GABAergic synapse [PATH:ko04727]|A 9150 Organismal Systems; B 09156 Nervous system; C 04723 Retrograde endocannabinoid signaling [PATH:ko04723]|A 9150 Organismal Systems; B 09156 Nervous system; C 04721 Synaptic vesicle cycle [PATH:ko04721]|A 9160 Human Diseases; B 09165 Substance dependence; C 05032 Morphine addiction [PATH:ko05032]|A 91…	327.045	-9.14483	1.76009	-5.19565	2.04001e-07	1.11061e-06	327.045	-11.2292	1.75897	-6.38392	1.72611e-10	1.70096e-09	327.045	-11.5078	1.7589	-6.54262	6.04504e-11	9.30548e-10	0	0	0	0	265.93	140.1	378.74	723.45	634.65	534.62	811.66	785.28
Am_Rn_049293	C:GO:0005749; P:GO:0006099; P:GO:0006121; F:GO:0008177; C:GO:0016021	C:mitochondrial respiratory chain complex II, succinate dehydrogenase complex (ubiquinone); P:tricarboxylic acid cycle; P:mitochondrial electron transport, succinate to ubiquinone; F:succinate dehydrogenase (ubiquinone) activity; C:integral component of membrane	K00236	SDHC, SDH3; succinate dehydrogenase (ubiquinone) cytochrome b560 subunit	A 9100 Metabolism; B 09101 Carbohydrate metabolism; C 00020 Citrate cycle (TCA cycle) [PATH:ko00020]|A 9100 Metabolism; B 09102 Energy metabolism; C 00190 Oxidative phosphorylation [PATH:ko00190]|A 9150 Organismal Systems; B 09159 Environmental adaptation; C 04714 Thermogenesis [PATH:ko04714]|A 9160 Human Diseases; B 09161 Cancer: overview; C 05208 Chemical carcinogenesis - reactive oxygen specie…	1172.54	0.360068	0.195973	1.83733	0.0661614	0.115317	1172.54	-0.642919	0.194985	-3.29728	0.000976249	0.00264397	1172.54	-0.0505449	0.195444	-0.258616	0.795932	0.879847	599.52	1034.64	1056.7	759.73	901.95	1035	1658.72	1771.14	1914.52	1159.12	1073.67	1420.73
Am_Rn_002531	F:GO:0005085; P:GO:0007264; P:GO:0043087	F:guanyl-nucleotide exchange factor activity; P:small GTPase mediated signal transduction; P:regulation of GTPase activity	K21852	DOCK6_7_8; dedicator of cytokinesis protein 6/7/8	None	739.879	0.143995	0.498472	0.288873	0.772678	0.856756	739.879	0.529006	0.498755	1.06065	0.288848	0.387987	739.879	-0.0977574	0.498316	-0.196176	0.844473	0.914123	818.12	742.99	424.98	536.85	1042.64	758.49	216.29	876.52	767.45	602.12	1008.76	1238.92
Am_Rn_114269	F:GO:0003735; C:GO:0005840; P:GO:0006412; P:GO:0042254	F:structural constituent of ribosome; C:ribosome; P:translation; P:ribosome biogenesis	K02889	RP-L21e, RPL21; large subunit ribosomal protein L21e	A 9120 Genetic Information Processing; B 09122 Translation; C 03010 Ribosome [PATH:ko03010]|A 9160 Human Diseases; B 09172 Infectious disease: viral; C 05171 Coronavirus disease - COVID-19 [PATH:ko05171]	23.4655	9.09348	2.77051	3.28224	0.00102985	0.00284908	23.4655	9.08459	2.77051	3.27904	0.00104162	0.00279744	23.4655	9.12555	2.77051	3.29382	0.000988357	0.00324439	42	49	142	0	0	0	0	0	0	0	0	0
Am_Rn_002536	C:GO:0005802; P:GO:0032012	C:trans-Golgi network; P:regulation of ARF protein signal transduction	K13462	MIN7; guanine nucleotide-exchange factor	None	1131.32	-0.249497	0.303442	-0.822223	0.41095	0.528949	1131.32	-0.448355	0.30332	-1.47816	0.139365	0.210302	1131.32	-0.573867	0.303219	-1.89258	0.0584138	0.110206	448.21	1182.18	660.46	972.27	1162.29	1311.39	934.74	1446.16	1598.04	1146.3	1398.42	1863.19
Am_Rn_116664	F:GO:0003723; F:GO:0003735; P:GO:0006412; C:GO:0015935; P:GO:0042254	F:RNA binding; F:structural constituent of ribosome; P:translation; C:small ribosomal subunit; P:ribosome biogenesis	K02958	RP-S15e, RPS15; small subunit ribosomal protein S15e	A 9120 Genetic Information Processing; B 09122 Translation; C 03010 Ribosome [PATH:ko03010]|A 9160 Human Diseases; B 09172 Infectious disease: viral; C 05171 Coronavirus disease - COVID-19 [PATH:ko05171]	23.3691	9.08755	2.73874	3.31816	0.000906136	0.00253929	23.3691	9.07867	2.73874	3.31491	0.000916718	0.00250051	23.3691	9.11963	2.73874	3.32987	0.000868871	0.00290024	41	58	134	0	0	0	0	0	0	0	0	0
Am_Rn_092118	C:GO:0009523; P:GO:0015979; C:GO:0016021	C:photosystem II; P:photosynthesis; C:integral component of membrane	.	.	.	909.368	-12.9256	1.21182	-10.6663	1.46334e-26	6.53659e-25	909.368	-12.4774	1.21188	-10.2959	7.35075e-25	4.51235e-23	909.368	-11.4832	1.21208	-9.474	2.69326e-21	1.85203e-19	0	0	0	1152	2186	2279.99	1371	1354.99	1293.99	727	612	754.99
Am_Rn_087833	C:GO:0005886; P:GO:0008643; C:GO:0016021	C:plasma membrane; P:carbohydrate transport; C:integral component of membrane	K15382	SLC50A, SWEET; solute carrier family 50 (sugar transporter)	None	26.3032	9.08	1.69354	5.36156	8.25068e-08	4.75931e-07	26.3032	2.92713	1.23859	2.36329	0.0181137	0.0354115	26.3032	9.11208	1.69354	5.3805	7.428e-08	6.50122e-07	56.76	14	155.05	0	0	0	8.52	11.4	19.82	0	0	0
Am_Rn_073025	C:GO:0009522; C:GO:0009523; C:GO:0009535; P:GO:0009765; C:GO:0016021; F:GO:0016168; P:GO:0018298; F:GO:0046872	C:photosystem I; C:photosystem II; C:chloroplast thylakoid membrane; P:photosynthesis, light harvesting; C:integral component of membrane; F:chlorophyll binding; P:obsolete protein-chromophore linkage; F:metal ion binding	K08910	LHCA4; light-harvesting complex I chlorophyll a/b binding protein 4	A 9100 Metabolism; B 09102 Energy metabolism; C 00196 Photosynthesis - antenna proteins [PATH:ko00196]	5238.39	-12.6881	0.732054	-17.3322	2.68613e-67	1.30081e-64	5238.39	-11.8103	0.73209	-16.1323	1.51191e-58	1.09826e-55	5238.39	-11.4813	0.732106	-15.6825	1.99142e-55	1.71578e-52	0	4.2	0	9603.69	10931.4	13788.1	5207.88	6288.48	7047.43	5272.26	4516.61	5292.52
Am_Rn_039366	F:GO:0008194; C:GO:0016021; C:GO:0043231; F:GO:0102241	F:UDP-glycosyltransferase activity; C:integral component of membrane; C:intracellular membrane-bounded organelle; F:soyasaponin III rhamnosyltransferase activity	K18823	UGT91H4; soyasaponin III rhamnosyltransferase [EC:2.4.1.273]	None	536.252	-9.61138	1.3931	-6.89929	5.22636e-12	5.42166e-11	536.252	-12.5545	1.39193	-9.01946	1.89022e-19	6.16118e-18	536.252	-11.4723	1.39212	-8.24094	1.70865e-16	6.21778e-15	0	0	0	191	261	91	1167	1318	1842	153	1311	611
Am_Rn_103932	C:GO:0000786; F:GO:0003677; C:GO:0005634; F:GO:0046982	C:nucleosome; F:DNA binding; C:nucleus; F:protein heterodimerization activity	K11252	H2B; histone H2B	A 9150 Organismal Systems; B 09151 Immune system; C 04613 Neutrophil extracellular trap formation [PATH:ko04613]|A 9160 Human Diseases; B 09161 Cancer: overview; C 05203 Viral carcinogenesis [PATH:ko05203]|A 9160 Human Diseases; B 09163 Immune disease; C 05322 Systemic lupus erythematosus [PATH:ko05322]|A 9160 Human Diseases; B 09165 Substance dependence; C 05034 Alcoholism [PATH:ko05034]	23.2838	7.23786	2.34434	3.08737	0.00201934	0.00524428	23.2838	9.064	2.41352	3.7555	0.000172992	0.000557497	23.2838	9.10496	2.41352	3.77248	0.000161636	0.000657907	3	20	208	1	0	1	0	0	0	0	0	0
Am_Rn_114878	F:GO:0003735; C:GO:0005840; P:GO:0006412; P:GO:0042254	F:structural constituent of ribosome; C:ribosome; P:translation; P:ribosome biogenesis	K02974	RP-S24e, RPS24; small subunit ribosomal protein S24e	A 9120 Genetic Information Processing; B 09122 Translation; C 03010 Ribosome [PATH:ko03010]|A 9160 Human Diseases; B 09172 Infectious disease: viral; C 05171 Coronavirus disease - COVID-19 [PATH:ko05171]	23.0656	9.0687	2.75387	3.29308	0.000990979	0.00275303	23.0656	9.05981	2.75387	3.28985	0.00100241	0.00270571	23.0656	9.10077	2.75387	3.30472	0.000950706	0.00313414	40	57	133	0	0	0	0	0	0	0	0	0
Am_Rn_067411	P:GO:0002100; P:GO:0006144; F:GO:0008251; F:GO:0008270; F:GO:0008892; C:GO:0016021	P:tRNA wobble adenosine to inosine editing; P:purine nucleobase metabolic process; F:tRNA-specific adenosine deaminase activity; F:zinc ion binding; F:guanine deaminase activity; C:integral component of membrane	.	.	.	66.8638	10.1553	2.21135	4.59237	4.38242e-06	1.91827e-05	66.8638	3.291	1.88023	1.75032	0.0800635	0.130333	66.8638	1.9288	1.87479	1.02881	0.30357	0.426983	1	77.31	414.93	0	0	0	50	1	6	2	116.14	51.26
Am_Rn_095179	F:GO:0003723; F:GO:0003735; P:GO:0006412; C:GO:0022625; P:GO:0042254	F:RNA binding; F:structural constituent of ribosome; P:translation; C:cytosolic large ribosomal subunit; P:ribosome biogenesis	K02885	RP-L19e, RPL19; large subunit ribosomal protein L19e	A 9120 Genetic Information Processing; B 09122 Translation; C 03010 Ribosome [PATH:ko03010]|A 9160 Human Diseases; B 09172 Infectious disease: viral; C 05171 Coronavirus disease - COVID-19 [PATH:ko05171]	22.6368	9.04153	3.48573	2.59387	0.00949029	0.0209659	22.6368	9.03265	3.48573	2.59132	0.00956089	0.0201487	22.6368	9.07361	3.48573	2.60307	0.00923933	0.0228595	3	19	204	0	0	0	0	0	0	0	0	0
Am_Rn_056589	C:GO:0005768; C:GO:0005802; F:GO:0008168; C:GO:0016021; P:GO:0032259	C:endosome; C:trans-Golgi network; F:methyltransferase activity; C:integral component of membrane; P:methylation	.	.	.	257.744	-9.23377	1.48336	-6.22492	4.81795e-10	3.85904e-09	257.744	-10.3606	1.48248	-6.98873	2.77388e-12	3.63055e-11	257.744	-11.4076	1.48207	-7.69703	1.39269e-14	3.80217e-13	0	0	0	7.66	193.92	243.94	223	325.53	403.37	470.72	638.76	886.25
Am_Rn_002582	P:GO:0006554; C:GO:0016020; F:GO:0018024; P:GO:0034968	P:lysine catabolic process; C:membrane; F:histone-lysine N-methyltransferase activity; P:histone lysine methylation	.	.	.	618.552	0.0836062	0.206587	0.404703	0.685696	0.782989	618.552	0.338529	0.207106	1.63457	0.10214	0.160968	618.552	-0.0921381	0.206237	-0.446758	0.65505	0.765601	512	565	537.79	611	650.69	715	375.83	609.83	690	567	818.18	901
Am_Rn_064894	.	.	K21027	TRMU, SLM3; tRNA-5-taurinomethyluridine 2-sulfurtransferase [EC:2.8.1.14]	None	22.8104	9.03746	2.22228	4.06676	4.76719e-05	0.000174538	22.8104	6.60604	2.06304	3.20209	0.00136436	0.00357134	22.8104	9.06953	2.22228	4.08119	4.48057e-05	0.000210174	149.44	5.88	53.6	0	0	0	1	0	2.01	0	0	0
Am_Rn_056040	F:GO:0030246	F:carbohydrate binding	.	.	.	1335.63	0.656932	0.137935	4.76261	1.91108e-06	8.89561e-06	1335.63	-0.646836	0.13615	-4.7509	2.02514e-06	9.69783e-06	1335.63	-0.155313	0.136596	-1.13702	0.255529	0.372541	996.27	1126.16	952.01	737.97	861.3	931.04	1974.38	2188.96	2005.98	1332.73	1529.35	1673.7
Am_Rn_071634	.	.	.	.	.	493.155	-9.17121	1.56566	-5.85772	4.69262e-09	3.27538e-08	493.155	-12.453	1.56421	-7.96121	1.70366e-15	3.45361e-14	493.155	-11.3883	1.56438	-7.27975	3.34434e-13	7.54188e-12	0	0	0	41	336.37	17.15	1805.19	1367.42	648.46	770.84	322.11	875.34
Am_Rn_098919	F:GO:0003723; F:GO:0003735; P:GO:0006412; C:GO:0015934; P:GO:0042254	F:RNA binding; F:structural constituent of ribosome; P:translation; C:large ribosomal subunit; P:ribosome biogenesis	K02865	RP-L10Ae, RPL10A; large subunit ribosomal protein L10Ae	A 9120 Genetic Information Processing; B 09122 Translation; C 03010 Ribosome [PATH:ko03010]|A 9160 Human Diseases; B 09172 Infectious disease: viral; C 05171 Coronavirus disease - COVID-19 [PATH:ko05171]	22.4308	9.02832	3.53482	2.55411	0.010646	0.0232282	22.4308	9.01944	3.53482	2.55159	0.0107231	0.0223051	22.4308	9.0604	3.53482	2.56318	0.0103718	0.0252687	4	10	209	0	0	0	0	0	0	0	0	0
Am_Rn_002599	C:GO:0005829; P:GO:0032456; P:GO:0042147; C:GO:1990745	C:cytosol; P:endocytic recycling; P:retrograde transport, endosome to Golgi; C:EARP complex	K23288	VPS50; syndetin	None	295.403	0.441345	0.371011	1.18957	0.234214	0.335743	295.403	0.280332	0.370681	0.756264	0.449491	0.556352	295.403	0.345961	0.370718	0.933219	0.350707	0.478643	223.83	345.94	314.85	226.23	299.28	313.81	162.56	394.16	399.74	200.95	256.01	463.38
Am_Rn_107341	C:GO:0009522; C:GO:0009523; C:GO:0009535; P:GO:0009765; C:GO:0016021; F:GO:0016168; P:GO:0018298	C:photosystem I; C:photosystem II; C:chloroplast thylakoid membrane; P:photosynthesis, light harvesting; C:integral component of membrane; F:chlorophyll binding; P:obsolete protein-chromophore linkage	K08912	LHCB1; light-harvesting complex II chlorophyll a/b binding protein 1	A 9100 Metabolism; B 09102 Energy metabolism; C 00196 Photosynthesis - antenna proteins [PATH:ko00196]	14313.4	-11.8113	0.770842	-15.3226	5.39977e-53	1.23866e-50	14313.4	-11.4122	0.770848	-14.8047	1.36527e-49	5.86661e-47	14313.4	-11.3369	0.770849	-14.707	5.81071e-49	3.95858e-46	0	17.1	0	18703.8	28607.9	27102.8	18888.5	18866.8	17730.2	22601	17615.8	14165
Am_Rn_002602	F:GO:0003676; F:GO:0008270; P:GO:0015074	F:nucleic acid binding; F:zinc ion binding; P:DNA integration	.	.	.	485.892	-2.01037	0.906786	-2.21703	0.0266212	0.052422	485.892	1.85426	0.910511	2.0365	0.0416998	0.0737261	485.892	0.619029	0.908158	0.681632	0.495472	0.622399	9.15	593.18	261.83	1364.14	1495.62	1340.27	49.15	144.41	103.13	153.02	375.13	166.64
Am_Rn_080640	F:GO:0005509; F:GO:0005544	F:calcium ion binding; F:calcium-dependent phospholipid binding	K17099	ANXA13; annexin A13	None	22.4069	9.02687	2.68945	3.3564	0.00078963	0.0022408	22.4069	9.01799	2.68945	3.3531	0.000799117	0.00220996	22.4069	9.05895	2.68945	3.36833	0.00075625	0.00256496	55	58	109	0	0	0	0	0	0	0	0	0
Am_Rn_092525	.	.	.	.	.	22.6992	8.0499	1.60307	5.02155	5.1257e-07	2.61855e-06	22.6992	5.59618	1.24033	4.51187	6.42597e-06	2.78995e-05	22.6992	9.04377	1.60307	5.64152	1.68551e-08	1.68344e-07	58.5	21.79	136.18	0	0	1	1.22	2.12	3.36	0	0	0
Am_Rn_054327	.	.	K10290	FBXO3; F-box protein 3	None	456.522	-0.200996	0.192461	-1.04434	0.296326	0.408043	456.522	-0.648142	0.191399	-3.38634	0.000708321	0.00198295	456.522	-0.426214	0.191787	-2.22233	0.0262613	0.0562353	252.19	403.89	250.33	385.14	457.52	494.33	502.89	617.41	700.85	451.3	609.19	533.05
Am_Rn_085452	F:GO:0003743; F:GO:0003746; C:GO:0005840; P:GO:0006446; P:GO:0006452; F:GO:0043022; P:GO:0045901; P:GO:0045905	F:translation initiation factor activity; F:translation elongation factor activity; C:ribosome; P:regulation of translational initiation; P:translational frameshifting; F:ribosome binding; P:positive regulation of translational elongation; P:positive regulation of translational termination	K03263	EIF5A; translation initiation factor 5A	None	22.051	9.0037	3.51058	2.56473	0.0103255	0.0226059	22.051	8.99481	3.51058	2.5622	0.010401	0.0217182	22.051	9.03577	3.51058	2.57387	0.0100568	0.0246015	3	17	200	0	0	0	0	0	0	0	0	0
Am_Rn_053040	P:GO:0006629; P:GO:0010345; P:GO:0035336; F:GO:0080019; F:GO:0102965	P:lipid metabolic process; P:suberin biosynthetic process; P:long-chain fatty-acyl-CoA metabolic process; F:fatty-acyl-CoA reductase (alcohol-forming) activity; F:alcohol-forming fatty acyl-CoA reductase activity	K13356	FAR; alcohol-forming fatty acyl-CoA reductase [EC:1.2.1.84]	A 9100 Metabolism; B 09103 Lipid metabolism; C 00073 Cutin, suberine and wax biosynthesis [PATH:ko00073]|A 9140 Cellular Processes; B 09141 Transport and catabolism; C 04146 Peroxisome [PATH:ko04146]|A 9150 Organismal Systems; B 09149 Aging; C 04212 Longevity regulating pathway - worm [PATH:ko04212]	1029.1	-13.4605	1.29684	-10.3794	3.0757e-25	1.25955e-23	1029.1	-12.1866	1.29699	-9.39606	5.66451e-21	2.23858e-19	1029.1	-11.3248	1.29717	-8.73036	2.53855e-18	1.20136e-16	0	0	0	2412.17	1903.41	3906.16	872.49	594.37	1927.3	1006.97	470.62	383.3
Am_Rn_002621	P:GO:0006886; P:GO:0016192	P:intracellular protein transport; P:vesicle-mediated transport	K20178	VPS8; vacuolar protein sorting-associated protein 8	A 9140 Cellular Processes; B 09141 Transport and catabolism; C 04138 Autophagy - yeast [PATH:ko04138]	419.431	-0.539495	0.40084	-1.34591	0.178331	0.267614	419.431	0.536576	0.402346	1.33362	0.182329	0.264572	419.431	0.170974	0.401638	0.425691	0.670333	0.778432	399.69	404.54	224.41	695.41	597.58	643.32	139.81	348.27	464.97	313.66	355.42	551.64
Am_Rn_026240	.	.	K18857	ADH1; alcohol dehydrogenase class-P [EC:1.1.1.1]	A 9100 Metabolism; B 09101 Carbohydrate metabolism; C 00010 Glycolysis / Gluconeogenesis [PATH:ko00010]|A 9100 Metabolism; B 09101 Carbohydrate metabolism; C 00620 Pyruvate metabolism [PATH:ko00620]|A 9100 Metabolism; B 09103 Lipid metabolism; C 00071 Fatty acid degradation [PATH:ko00071]|A 9100 Metabolism; B 09103 Lipid metabolism; C 00592 alpha-Linolenic acid metabolism [PATH:ko00592]|A 9100 Me…	43.1294	8.99571	1.45553	6.18036	6.39574e-10	5.02907e-09	43.1294	7.49659	1.19126	6.29297	3.11445e-10	2.94723e-09	43.1294	9.02778	1.45553	6.20239	5.56116e-10	7.25005e-09	215.93	91.94	101.55	1.33	0	0	1.24	1.81	0	1.31	0	0
Am_Rn_074294	P:GO:0001731; P:GO:0001732; F:GO:0003729; F:GO:0003743; C:GO:0005840; C:GO:0005850; P:GO:0006446; F:GO:0031369	P:formation of translation preinitiation complex; P:formation of cytoplasmic translation initiation complex; F:mRNA binding; F:translation initiation factor activity; C:ribosome; C:eukaryotic translation initiation factor 2 complex; P:regulation of translational initiation; F:translation initiation factor binding	K03238	EIF2S2; translation initiation factor 2 subunit 2	None	672.197	-0.424377	0.199862	-2.12335	0.0337243	0.0643824	672.197	-0.649571	0.199534	-3.25543	0.00113221	0.00301628	672.197	-0.458321	0.199749	-2.29448	0.0217629	0.0477875	336.39	532.38	407.61	650.28	718.1	834.87	924.11	762.68	831.55	662.96	749.22	889.04
Am_Rn_025656	P:GO:0005975; F:GO:0008422; F:GO:0102483	P:carbohydrate metabolic process; F:beta-glucosidase activity; F:scopolin beta-glucosidase activity	K01188	E3.2.1.21; beta-glucosidase [EC:3.2.1.21]	A 9100 Metabolism; B 09101 Carbohydrate metabolism; C 00500 Starch and sucrose metabolism [PATH:ko00500]|A 9100 Metabolism; B 09106 Metabolism of other amino acids; C 00460 Cyanoamino acid metabolism [PATH:ko00460]|A 9100 Metabolism; B 09110 Biosynthesis of other secondary metabolites; C 00999 Biosynthesis of various plant secondary metabolites [PATH:ko00999]	255.131	11.1894	1.82783	6.12167	9.25984e-10	7.10892e-09	255.131	1.71984	1.39863	1.22966	0.218826	0.308026	255.131	9.02745	1.54164	5.85574	4.74882e-09	5.23161e-08	22.16	80.2	1841.08	1	0	0	91.23	366.18	332.75	0	0.81	4
Am_Rn_091621	C:GO:0005829; F:GO:0020037; F:GO:0046872	C:cytosol; F:heme binding; F:metal ion binding	.	.	.	225.732	0.176932	0.222876	0.793859	0.427277	0.545545	225.732	-0.650007	0.219411	-2.9625	0.00305147	0.00731782	225.732	0.133221	0.222452	0.598878	0.549254	0.67226	161.55	191.01	161.1	163.73	171.44	259.75	364.52	321.27	341.45	233.81	200.29	184.34
Am_Rn_169587	.	.	.	.	.	42.5121	9.94495	2.38147	4.17597	2.9672e-05	0.000112665	42.5121	8.97427	2.38147	3.76837	0.000164315	0.000532288	42.5121	9.01523	2.38147	3.78557	0.000153355	0.000628922	361	6	16	0	0	0	1	0	0	0	0	1
Am_Rn_046249	F:GO:0016787	F:hydrolase activity	K07018	K07018; uncharacterized protein	None	379.627	-0.445013	0.23956	-1.85763	0.0632221	0.11091	379.627	-0.650689	0.239135	-2.72101	0.00650825	0.014322	379.627	-0.28594	0.239861	-1.19211	0.23322	0.346447	189.41	344.11	210.07	392.63	392.79	512.29	507.35	470.76	488.96	370.21	470.4	338.16
Am_Rn_106262	F:GO:0003735; C:GO:0005840; P:GO:0006412; F:GO:0015293; C:GO:0016021; P:GO:0042254; P:GO:0055085	F:structural constituent of ribosome; C:ribosome; P:translation; F:symporter activity; C:integral component of membrane; P:ribosome biogenesis; P:transmembrane transport	K02955	RP-S14e, RPS14; small subunit ribosomal protein S14e	A 9120 Genetic Information Processing; B 09122 Translation; C 03010 Ribosome [PATH:ko03010]|A 9160 Human Diseases; B 09172 Infectious disease: viral; C 05171 Coronavirus disease - COVID-19 [PATH:ko05171]	21.5478	8.97048	2.72947	3.28653	0.00101431	0.00281041	21.5478	8.96159	2.72947	3.28327	0.00102609	0.00276083	21.5478	9.00255	2.72947	3.29828	0.000972793	0.00319904	50	58	106	0	0	0	0	0	0	0	0	0
Am_Rn_061849	P:GO:0006000; P:GO:0006013; C:GO:0016021; P:GO:0042350; F:GO:0050577	P:fructose metabolic process; P:mannose metabolic process; C:integral component of membrane; P:GDP-L-fucose biosynthetic process; F:GDP-L-fucose synthase activity	K02377	TSTA3, fcl; GDP-L-fucose synthase [EC:1.1.1.271]	A 9100 Metabolism; B 09101 Carbohydrate metabolism; C 00051 Fructose and mannose metabolism [PATH:ko00051]|A 9100 Metabolism; B 09101 Carbohydrate metabolism; C 00520 Amino sugar and nucleotide sugar metabolism [PATH:ko00520]|A 9100 Metabolism; B 09107 Glycan biosynthesis and metabolism; C 00541 O-Antigen nucleotide sugar biosynthesis [PATH:ko00541]	555.592	0.505254	0.24079	2.09831	0.0358774	0.0680204	555.592	-0.650931	0.238691	-2.72708	0.00638971	0.0140927	555.592	-0.207601	0.23924	-0.867752	0.38553	0.514966	277.19	524.53	461.96	302.33	412.51	424.88	855.83	815.32	825.96	518.29	662.69	726.32
Am_Rn_079255	C:GO:0005634; P:GO:0009416	C:nucleus; P:response to light stimulus	.	.	.	170.513	8.36266	0.977994	8.55083	1.2221e-17	2.44653e-16	170.513	8.93902	1.14225	7.82583	5.04337e-15	9.5511e-14	170.513	-0.30951	0.507817	-0.609491	0.542199	0.666101	322.12	315.28	113	0	1	2	0	1	1	371.01	426.96	440.45
Am_Rn_010481	C:GO:0005737; C:GO:0016021	C:cytoplasm; C:integral component of membrane	K17710	PTCD1; pentatricopeptide repeat domain-containing protein 1	None	730.413	-12.6322	1.21881	-10.3644	3.60122e-25	1.45716e-23	730.413	-12.0691	1.2189	-9.90162	4.09594e-23	2.08968e-21	730.413	-11.2782	1.21909	-9.25132	2.21746e-20	1.38504e-18	0	0	0	1901.4	1145.74	1464.48	830.17	1199.08	1043.52	636.35	728.7	442.1
Am_Rn_026394	P:GO:0009416; C:GO:0009522; C:GO:0009523; C:GO:0009535; P:GO:0009768; C:GO:0009941; C:GO:0010287; C:GO:0016021; F:GO:0016168; P:GO:0018298; F:GO:0046872	P:response to light stimulus; C:photosystem I; C:photosystem II; C:chloroplast thylakoid membrane; P:photosynthesis, light harvesting in photosystem I; C:chloroplast envelope; C:plastoglobule; C:integral component of membrane; F:chlorophyll binding; P:obsolete protein-chromophore linkage; F:metal ion binding	K08913	LHCB2; light-harvesting complex II chlorophyll a/b binding protein 2	A 9100 Metabolism; B 09102 Energy metabolism; C 00196 Photosynthesis - antenna proteins [PATH:ko00196]	6927.03	-12.3944	0.698442	-17.7458	1.85667e-70	1.11069e-67	6927.03	-12.5626	0.698438	-17.9867	2.47824e-72	3.9794e-69	6927.03	-11.2596	0.698492	-16.1199	1.85057e-58	1.80702e-55	0	5	0	9692.01	10946.9	14194.3	14475.9	10626.8	12887.9	6122.11	4307.64	5640.79
Am_Rn_069328	F:GO:0003919; P:GO:0009231; F:GO:0016301; P:GO:0016310	F:FMN adenylyltransferase activity; P:riboflavin biosynthetic process; F:kinase activity; P:phosphorylation	K22949	RIBF; FAD synthetase [EC:2.7.7.2]	A 9100 Metabolism; B 09108 Metabolism of cofactors and vitamins; C 00740 Riboflavin metabolism [PATH:ko00740]	111.976	-1.10655	0.235282	-4.70309	2.56253e-06	1.16704e-05	111.976	-0.653708	0.238579	-2.74	0.00614384	0.0136104	111.976	-0.490823	0.239591	-2.04858	0.0405027	0.0808564	58.83	59.46	63	141.98	142.95	226.52	115.42	107.85	144.7	119.09	106.64	110.76
Am_Rn_002676	F:GO:0005198; C:GO:0005829; P:GO:0006886; P:GO:0006898; C:GO:0009506; C:GO:0009507; C:GO:0030130; C:GO:0030132; F:GO:0032051; C:GO:0071439	F:structural molecule activity; C:cytosol; P:intracellular protein transport; P:receptor-mediated endocytosis; C:plasmodesma; C:chloroplast; C:clathrin coat of trans-Golgi network vesicle; C:clathrin coat of coated pit; F:clathrin light chain binding; C:clathrin complex	K04646	CLTC; clathrin heavy chain	A 9140 Cellular Processes; B 09141 Transport and catabolism; C 04144 Endocytosis [PATH:ko04144]|A 9140 Cellular Processes; B 09141 Transport and catabolism; C 04142 Lysosome [PATH:ko04142]|A 9150 Organismal Systems; B 09155 Excretory system; C 04961 Endocrine and other factor-regulated calcium reabsorption [PATH:ko04961]|A 9150 Organismal Systems; B 09156 Nervous system; C 04721 Synaptic vesicle …	289.332	0.761073	0.600015	1.26842	0.204647	0.299926	289.332	0.545617	0.599721	0.909786	0.362935	0.469584	289.332	0.856465	0.600109	1.42718	0.153527	0.246259	151.09	409.74	476.89	280.07	242.12	249.95	102.4	364.85	472.97	98.48	338.01	309.88
Am_Rn_002679	F:GO:0016740	F:transferase activity	.	.	.	239.41	1.54005	1.19392	1.28991	0.197083	0.290628	239.41	2.59466	1.19572	2.16996	0.0300101	0.0552652	239.41	1.06254	1.19343	0.890323	0.373292	0.502775	13.17	498.84	728.38	399.92	58.17	49.52	123.52	85.16	33.01	529.08	71.27	150.52
Am_Rn_002683	.	.	.	.	.	418.539	-0.566932	0.489327	-1.1586	0.246621	0.350483	418.539	0.189381	0.490189	0.386342	0.699243	0.771907	418.539	-0.290983	0.489548	-0.59439	0.552251	0.674884	136.02	448.31	350.2	577.05	587.3	568.17	118.24	425.26	529.8	395.08	491.96	585.78
Am_Rn_111414	F:GO:0003735; C:GO:0005840; P:GO:0006412; P:GO:0042254	F:structural constituent of ribosome; C:ribosome; P:translation; P:ribosome biogenesis	K02868	RP-L11e, RPL11; large subunit ribosomal protein L11e	A 9120 Genetic Information Processing; B 09122 Translation; C 03010 Ribosome [PATH:ko03010]|A 9160 Human Diseases; B 09172 Infectious disease: viral; C 05171 Coronavirus disease - COVID-19 [PATH:ko05171]	21.5442	8.97028	2.70965	3.31049	0.000931316	0.00260189	21.5442	8.9614	2.70965	3.30721	0.000942288	0.002562	21.5442	9.00236	2.70965	3.32233	0.000892689	0.00296894	45	74	97	0	0	0	0	0	0	0	0	0
Am_Rn_089144	F:GO:0005524; F:GO:0016740	F:ATP binding; F:transferase activity	K06689	UBE2D, UBC4, UBC5; ubiquitin-conjugating enzyme E2 D [EC:2.3.2.23]	A 9120 Genetic Information Processing; B 09123 Folding, sorting and degradation; C 04141 Protein processing in endoplasmic reticulum [PATH:ko04141]|A 9120 Genetic Information Processing; B 09123 Folding, sorting and degradation; C 04120 Ubiquitin mediated proteolysis [PATH:ko04120]|A 9130 Environmental Information Processing; B 09132 Signal transduction; C 04013 MAPK signaling pathway - fly [PATH…	21.3093	8.95429	3.80647	2.35239	0.0186533	0.0381916	21.3093	8.9454	3.80647	2.35005	0.0187707	0.0365763	21.3093	8.98636	3.80647	2.36081	0.0182349	0.0410649	1	8	203	0	0	0	0	0	0	0	0	0
Am_Rn_002695	F:GO:0005324; F:GO:0005524; P:GO:0015909; C:GO:0016021; F:GO:0016887; F:GO:0042626; P:GO:0055085	F:long-chain fatty acid transporter activity; F:ATP binding; P:long-chain fatty acid transport; C:integral component of membrane; F:ATP hydrolysis activity; F:ATPase-coupled transmembrane transporter activity; P:transmembrane transport	.	.	.	431.573	0.0919713	0.497321	0.184933	0.853281	0.920569	431.573	0.156525	0.497403	0.314685	0.753001	0.816597	431.573	0.193596	0.497391	0.389222	0.697112	0.800925	380.8	492.68	287.21	385.71	458.26	571.34	115.51	633.39	653.82	334.48	447.22	560.75
Am_Rn_002696	F:GO:0000247; F:GO:0004769; C:GO:0005783; C:GO:0005886; P:GO:0008207; P:GO:0008209; P:GO:0008210; C:GO:0016021; P:GO:0016126; F:GO:0047750	F:C-8 sterol isomerase activity; F:steroid delta-isomerase activity; C:endoplasmic reticulum; C:plasma membrane; P:C21-steroid hormone metabolic process; P:androgen metabolic process; P:estrogen metabolic process; C:integral component of membrane; P:sterol biosynthetic process; F:cholestenol delta-isomerase activity	K01824	EBP; cholestenol Delta-isomerase [EC:5.3.3.5]	A 9100 Metabolism; B 09103 Lipid metabolism; C 00100 Steroid biosynthesis [PATH:ko00100]	166.458	-0.708045	1.38491	-0.511256	0.609172	0.71589	166.458	-0.950618	1.38469	-0.686522	0.492384	0.594068	166.458	-1.33017	1.38435	-0.96086	0.336623	0.46399	76.1	39.15	113.93	261.88	0	239.69	58.97	172.75	383.62	402.58	20.55	356.33
Am_Rn_002700	C:GO:0000123; F:GO:0003743; F:GO:0004402; C:GO:0005669; C:GO:0005840; P:GO:0006446; P:GO:0016573; F:GO:0017025; P:GO:0042967; F:GO:0043565; P:GO:0045944	C:histone acetyltransferase complex; F:translation initiation factor activity; F:histone acetyltransferase activity; C:transcription factor TFIID complex; C:ribosome; P:regulation of translational initiation; P:histone acetylation; F:TBP-class protein binding; P:obsolete acyl-carrier-protein biosynthetic process; F:sequence-specific DNA binding; P:positive regulation of transcription by RNA polym…	K03125	TAF1; transcription initiation factor TFIID subunit 1 [EC:2.3.1.48 2.7.11.1]	A 9120 Genetic Information Processing; B 09121 Transcription; C 03022 Basal transcription factors [PATH:ko03022]	345.326	0.925275	1.1184	0.827324	0.408054	0.526172	345.326	1.78735	1.11913	1.59709	0.110245	0.17179	345.326	1.39166	1.1187	1.244	0.213501	0.322503	468.61	602.72	494.8	348.37	358.5	353.95	0	323.49	300.28	132.86	314.66	343.23
Am_Rn_002707	F:GO:0016301; P:GO:0016310	F:kinase activity; P:phosphorylation	.	.	.	201.183	2.14858	1.03146	2.08306	0.0372462	0.0702705	201.183	1.80153	1.03072	1.74784	0.0804911	0.130922	201.183	0.881858	1.02933	0.856729	0.391595	0.521284	247.07	367.48	366.25	137.91	0	153.28	103.08	133.66	123.11	208.33	233.13	257.65
Am_Rn_002711	P:GO:0006723; P:GO:0009793; C:GO:0016021; P:GO:0043447	P:cuticle hydrocarbon biosynthetic process; P:embryo development ending in seed dormancy; C:integral component of membrane; P:alkane biosynthetic process	.	.	.	384.197	-0.702375	0.346381	-2.02775	0.0425857	0.0789001	384.197	-0.278187	0.347102	-0.801455	0.422868	0.530253	384.197	-0.688402	0.34635	-1.98759	0.0468571	0.0914114	205.96	333.25	169.84	388.95	453.34	653.33	241.76	316.37	564.4	399.15	417.92	683.78
Am_Rn_078156	C:GO:0016021	C:integral component of membrane	.	.	.	1498.76	0.385813	0.254655	1.51504	0.129762	0.205082	1498.76	-0.654324	0.254056	-2.57551	0.0100093	0.0209921	1498.76	0.177503	0.254472	0.697535	0.485468	0.613596	968.86	1187.5	1373.67	954.69	1002.95	1586.65	2767.17	2015.71	2221.2	1501.64	1391.56	1219.33
Am_Rn_100093	F:GO:0003735; C:GO:0005840; P:GO:0006412; P:GO:0042254	F:structural constituent of ribosome; C:ribosome; P:translation; P:ribosome biogenesis	K02889	RP-L21e, RPL21; large subunit ribosomal protein L21e	A 9120 Genetic Information Processing; B 09122 Translation; C 03010 Ribosome [PATH:ko03010]|A 9160 Human Diseases; B 09172 Infectious disease: viral; C 05171 Coronavirus disease - COVID-19 [PATH:ko05171]	21.1086	8.94065	3.68023	2.42937	0.0151249	0.0317167	21.1086	8.93177	3.68023	2.42696	0.015226	0.0303812	21.1086	8.97273	3.68023	2.43809	0.0147651	0.0342815	2	9	199	0	0	0	0	0	0	0	0	0
Am_Rn_114270	F:GO:0003735; C:GO:0005840; P:GO:0006412; P:GO:0042254	F:structural constituent of ribosome; C:ribosome; P:translation; P:ribosome biogenesis	K02983	RP-S30e, RPS30; small subunit ribosomal protein S30e	A 9120 Genetic Information Processing; B 09122 Translation; C 03010 Ribosome [PATH:ko03010]|A 9160 Human Diseases; B 09172 Infectious disease: viral; C 05171 Coronavirus disease - COVID-19 [PATH:ko05171]	21.1322	8.93779	1.99987	4.46918	7.85198e-06	3.2888e-05	21.1322	7.96711	1.99987	3.98381	6.78192e-05	0.000238485	21.1322	8.96986	1.99987	4.48522	7.28392e-06	4.13678e-05	32	68	112	0	0	0	0	0	1	0	0	0
Am_Rn_107211	F:GO:0003735; P:GO:0006412; C:GO:0015934; P:GO:0042254	F:structural constituent of ribosome; P:translation; C:large ribosomal subunit; P:ribosome biogenesis	K02880	RP-L17e, RPL17; large subunit ribosomal protein L17e	A 9120 Genetic Information Processing; B 09122 Translation; C 03010 Ribosome [PATH:ko03010]|A 9160 Human Diseases; B 09172 Infectious disease: viral; C 05171 Coronavirus disease - COVID-19 [PATH:ko05171]	20.9248	8.92815	2.81895	3.16719	0.0015392	0.00410558	20.9248	8.91926	2.81895	3.16404	0.00155597	0.00400973	20.9248	8.96022	2.81895	3.17857	0.00148005	0.00462027	41	50	117	0	0	0	0	0	0	0	0	0
Am_Rn_073614	.	.	.	.	.	20.9123	8.9272	3.58328	2.49135	0.0127258	0.0272056	20.9123	8.91832	3.58328	2.48887	0.0128149	0.0261048	20.9123	8.95928	3.58328	2.5003	0.0124087	0.0294977	2	19.13	188.05	0	0	0	0	0	0	0	0	0
Am_Rn_098788	F:GO:0008270	F:zinc ion binding	.	.	.	20.8583	8.92344	3.75444	2.37677	0.0174649	0.0360415	20.8583	8.91455	3.75444	2.3744	0.0175773	0.0344865	20.8583	8.95551	3.75444	2.38531	0.0170645	0.0388089	1	13	194	0	0	0	0	0	0	0	0	0
Am_Rn_071591	F:GO:0016491	F:oxidoreductase activity	.	.	.	796.183	9.66226	0.87358	11.0605	1.94941e-28	1.00804e-26	796.183	8.90156	0.81154	10.9687	5.40291e-28	4.47927e-26	796.183	0.834055	0.711191	1.17276	0.240893	0.355842	2458.81	1601.55	882.94	4.79	1	1.62	1	8	5.16	370.19	1367.8	2053
Am_Rn_074574	C:GO:0005847; P:GO:0006369; P:GO:0006378; C:GO:0008287; F:GO:0008420; P:GO:0070940	C:mRNA cleavage and polyadenylation specificity factor complex; P:termination of RNA polymerase II transcription; P:mRNA polyadenylation; C:protein serine/threonine phosphatase complex; F:RNA polymerase II CTD heptapeptide repeat phosphatase activity; P:dephosphorylation of RNA polymerase II C-terminal domain	K15544	SSU72; RNA polymerase II subunit A C-terminal domain phosphatase SSU72 [EC:3.1.3.16]	A 9120 Genetic Information Processing; B 09122 Translation; C 03015 mRNA surveillance pathway [PATH:ko03015]	194.574	-0.544051	0.25016	-2.17481	0.0296443	0.0574707	194.574	-0.654611	0.24975	-2.62106	0.00876568	0.0186585	194.574	-0.448192	0.250424	-1.78973	0.0734974	0.133721	135.2	127.73	92.83	212.6	193.96	273.42	267.32	213.15	236.37	201.32	220.96	223.96
Am_Rn_080227	F:GO:0003735; C:GO:0005840; P:GO:0006412; P:GO:0042254	F:structural constituent of ribosome; C:ribosome; P:translation; P:ribosome biogenesis	K02977	RP-S27Ae, RPS27A, UBA80; ubiquitin-small subunit ribosomal protein S27Ae	A 9120 Genetic Information Processing; B 09122 Translation; C 03010 Ribosome [PATH:ko03010]|A 9120 Genetic Information Processing; B 09123 Folding, sorting and degradation; C 04120 Ubiquitin mediated proteolysis [PATH:ko04120]|A 9140 Cellular Processes; B 09141 Transport and catabolism; C 04137 Mitophagy - animal [PATH:ko04137]|A 9160 Human Diseases; B 09172 Infectious disease: viral; C 05171 Cor…	20.7685	8.91735	2.71482	3.28469	0.00102093	0.00282697	20.7685	8.90846	2.71482	3.28142	0.00103285	0.00277608	20.7685	8.94942	2.71482	3.29651	0.000978945	0.00321746	53	69	85	0	0	0	0	0	0	0	0	0
Am_Rn_082978	P:GO:0006099; P:GO:0006119; F:GO:0008177; C:GO:0016021; C:GO:0045281	P:tricarboxylic acid cycle; P:oxidative phosphorylation; F:succinate dehydrogenase (ubiquinone) activity; C:integral component of membrane; C:succinate dehydrogenase complex	.	.	.	924.151	-0.0818068	0.240146	-0.340654	0.733364	0.824066	924.151	-0.654981	0.239617	-2.73344	0.0062676	0.0138544	924.151	-0.146649	0.240035	-0.610948	0.541234	0.665222	521.27	652.81	766.52	844.7	797.13	1021.64	1535.73	1141.79	1165.6	855.07	876.73	1110.06
Am_Rn_002741	.	.	K08997	SELENOO, selO; serine/tyrosine/threonine adenylyltransferase [EC:2.7.7.-]	None	882.763	0.154394	0.425152	0.36315	0.716493	0.80988	882.763	0.596816	0.425427	1.40286	0.160658	0.237407	882.763	0.935431	0.425654	2.19763	0.0279752	0.0593071	400.96	980.53	1509.27	1104.35	834.75	1401.97	942.37	663.58	768.6	779.79	610.67	570.95
Am_Rn_086275	.	.	.	.	.	20.7653	8.91708	2.70408	3.29764	0.000975021	0.0027124	20.7653	8.90819	2.70408	3.29435	0.000986493	0.00266793	20.7653	8.94915	2.70408	3.3095	0.000934634	0.00308846	70.69	67.57	66.32	0	0	0	0	0	0	0	0	0
Am_Rn_002747	.	.	.	.	.	280.198	0.0184517	0.458097	0.040279	0.967871	1	280.198	0.852076	0.459904	1.85272	0.0639219	0.107024	280.198	-0.00449332	0.458006	-0.00981062	0.992172	1	236.91	367.2	190.32	251.31	477.98	261.1	123.34	260.97	183.53	212.82	527.85	298.9
Am_Rn_002748	F:GO:0003676; C:GO:0005634; P:GO:0015074	F:nucleic acid binding; C:nucleus; P:DNA integration	.	.	.	263.521	0.0488893	0.442402	0.110509	0.912006	0.964785	263.521	0.928462	0.44453	2.08864	0.0367402	0.0660251	263.521	0.0452954	0.442334	0.102401	0.918438	0.967518	153.57	457.94	169.5	322.39	334.2	282.08	99.11	245.86	177.48	411.83	293.05	260.67
Am_Rn_107761	F:GO:0003735; C:GO:0005840; P:GO:0006412; P:GO:0042254	F:structural constituent of ribosome; C:ribosome; P:translation; P:ribosome biogenesis	K02951	RP-S12e, RPS12; small subunit ribosomal protein S12e	A 9120 Genetic Information Processing; B 09122 Translation; C 03010 Ribosome [PATH:ko03010]|A 9160 Human Diseases; B 09172 Infectious disease: viral; C 05171 Coronavirus disease - COVID-19 [PATH:ko05171]	20.7481	8.90613	2.05608	4.3316	1.48028e-05	5.9159e-05	20.7481	7.12745	1.98662	3.58772	0.00033358	0.00100824	20.7481	8.9382	2.05608	4.3472	1.37885e-05	7.3214e-05	51	52	101	0	0	0	0	0	2	0	0	0
Am_Rn_118401	F:GO:0003735; F:GO:0004672; F:GO:0005524; P:GO:0006412; P:GO:0006468; C:GO:0015934; P:GO:0042254	F:structural constituent of ribosome; F:protein kinase activity; F:ATP binding; P:translation; P:protein phosphorylation; C:large ribosomal subunit; P:ribosome biogenesis	K02898	RP-L26e, RPL26; large subunit ribosomal protein L26e	A 9120 Genetic Information Processing; B 09122 Translation; C 03010 Ribosome [PATH:ko03010]|A 9160 Human Diseases; B 09172 Infectious disease: viral; C 05171 Coronavirus disease - COVID-19 [PATH:ko05171]	20.53	8.90067	2.75516	3.23055	0.00123552	0.0033674	20.53	8.89179	2.75516	3.22732	0.00124954	0.00329748	20.53	8.93275	2.75516	3.24219	0.00118615	0.00380663	50	59	95	0	0	0	0	0	0	0	0	0
Am_Rn_031224	F:GO:0004343; P:GO:0006048; P:GO:0042967	F:glucosamine 6-phosphate N-acetyltransferase activity; P:UDP-N-acetylglucosamine biosynthetic process; P:obsolete acyl-carrier-protein biosynthetic process	.	.	.	86.829	-0.662297	0.260816	-2.53933	0.0111066	0.0241107	86.829	-0.656129	0.260962	-2.51427	0.0119278	0.0244939	86.829	-0.382045	0.263104	-1.45207	0.146483	0.237219	59.01	53.03	44.73	94.89	116.33	111.82	96.03	101.98	123.23	72.6	105.53	93.49
Am_Rn_055303	F:GO:0016491	F:oxidoreductase activity	.	.	.	307.426	8.55167	0.895047	9.55445	1.24246e-21	3.66953e-20	307.426	8.85618	0.94004	9.42107	4.46532e-21	1.78548e-19	307.426	0.460838	0.678357	0.679345	0.49692	0.623817	805.68	630.55	299.77	4.71	0	1.38	1	0	3.86	306.5	648.28	749.62
Am_Rn_060934	C:GO:0005886; C:GO:0016021; F:GO:0022857; P:GO:0055085	C:plasma membrane; C:integral component of membrane; F:transmembrane transporter activity; P:transmembrane transport	.	.	.	292.561	-3.0973	1.41272	-2.19244	0.0283475	0.0553399	292.561	-7.91527	1.35176	-5.85551	4.75541e-09	3.70014e-08	292.561	-11.258	1.34967	-8.34133	7.34582e-17	2.83516e-15	1	0	0	4	3	5	100.84	80.99	154.56	508.42	2347.74	607.34
Am_Rn_048875	F:GO:0005524; P:GO:0005975; F:GO:0008974; P:GO:0009409; C:GO:0009535; C:GO:0009570; C:GO:0009941; C:GO:0010319; P:GO:0015976; P:GO:0016310; P:GO:0042742; F:GO:0042803; C:GO:0048046; F:GO:0097718; C:GO:0099080	F:ATP binding; P:carbohydrate metabolic process; F:phosphoribulokinase activity; P:response to cold; C:chloroplast thylakoid membrane; C:chloroplast stroma; C:chloroplast envelope; C:stromule; P:carbon utilization; P:phosphorylation; P:defense response to bacterium; F:protein homodimerization activity; C:apoplast; F:disordered domain specific binding; C:supramolecular complex	K00855	PRK, prkB; phosphoribulokinase [EC:2.7.1.19]	A 9100 Metabolism; B 09102 Energy metabolism; C 00710 Carbon fixation in photosynthetic organisms [PATH:ko00710]	3058.39	-14.4713	1.20572	-12.0022	3.45866e-33	2.52441e-31	3058.39	-11.6151	1.20589	-9.63191	5.86301e-22	2.58489e-20	3058.39	-11.2129	1.20595	-9.29803	1.43072e-20	9.15096e-19	0	1	0	12699	8042.62	10790	1046.69	1529.72	1842.17	1245.47	906.06	1230.53
Am_Rn_075409	F:GO:0004553; C:GO:0005618; P:GO:0010411; C:GO:0016021; F:GO:0016762; P:GO:0042546; C:GO:0048046; P:GO:0071555	F:hydrolase activity, hydrolyzing O-glycosyl compounds; C:cell wall; P:xyloglucan metabolic process; C:integral component of membrane; F:xyloglucan:xyloglucosyl transferase activity; P:cell wall biogenesis; C:apoplast; P:cell wall organization	K08235	E2.4.1.207; xyloglucan:xyloglucosyl transferase [EC:2.4.1.207]	None	20.5839	7.13925	2.13912	3.33747	0.000845434	0.00238518	20.5839	8.88603	2.20128	4.03676	5.41947e-05	0.000194566	20.5839	8.92699	2.20128	4.05537	5.00558e-05	0.000232383	23.84	70.84	112.3	0	0	2	0	0	0	0	0	0
Am_Rn_047624	F:GO:0003824	F:catalytic activity	.	.	.	2220.82	-14.9415	1.24186	-12.0315	2.42686e-33	1.78412e-31	2220.82	-12.5912	1.24202	-10.1377	3.75978e-24	2.13365e-22	2220.82	-11.1579	1.24233	-8.98144	2.67237e-19	1.44971e-17	0	0	0	7611.4	5856.9	9210.53	1189.73	1314.14	1939.06	488.96	301.32	894.69
Am_Rn_087621	P:GO:0001731; F:GO:0003743; C:GO:0005840; P:GO:0006446; C:GO:0016282; F:GO:0031369; F:GO:0043024; C:GO:0043614; P:GO:1990145	P:formation of translation preinitiation complex; F:translation initiation factor activity; C:ribosome; P:regulation of translational initiation; C:eukaryotic 43S preinitiation complex; F:translation initiation factor binding; F:ribosomal small subunit binding; C:multi-eIF complex; P:maintenance of translational fidelity	K03113	EIF1, SUI1; translation initiation factor 1	None	39.8562	9.85497	2.6708	3.6899	0.000224346	0.000717612	39.8562	9.84608	2.6708	3.68657	0.000227299	0.000714618	39.8562	8.92525	2.6708	3.34179	0.0008324	0.00279348	2	60	338	0	0	0	0	0	0	1	0	0
Am_Rn_031717	F:GO:0030619	F:U1 snRNA binding	K11093	SNRP70; U1 small nuclear ribonucleoprotein 70kDa	A 9120 Genetic Information Processing; B 09121 Transcription; C 03040 Spliceosome [PATH:ko03040]	414.043	-1.09354	0.275663	-3.96693	7.2805e-05	0.000256254	414.043	-0.659257	0.276357	-2.38553	0.0170547	0.0336016	414.043	-0.0442387	0.277609	-0.159356	0.873388	0.935228	279.68	173.6	249.45	610.26	616.49	759.21	511.92	512.36	410.71	346.53	293.06	335.88
Am_Rn_070508	F:GO:0004197; C:GO:0030176; P:GO:0071586	F:cysteine-type endopeptidase activity; C:integral component of endoplasmic reticulum membrane; P:CAAX-box protein processing	K07052	K07052; CAAX protease family protein	None	101.818	-0.650916	0.222074	-2.93108	0.00337786	0.0083351	101.818	-0.659699	0.222088	-2.97044	0.00297371	0.00715046	101.818	-0.444018	0.223667	-1.98517	0.0471253	0.0918518	45.31	73.38	67.03	119.62	124.68	128.21	95.04	142.06	140.21	98.06	109.31	123.96
Am_Rn_027720	.	.	K21843	TTC7; tetratricopeptide repeat protein 7	None	366.227	4.54503	1.27805	3.55623	0.000376213	0.00114859	366.227	8.84705	1.41184	6.26631	3.69698e-10	3.46304e-09	366.227	0.321272	1.27094	0.252784	0.800435	0.883462	442.81	813.4	742.65	70.99	32.46	0	4.79	0	0	944.56	557.82	575.62
Am_Rn_021041	F:GO:0004683; F:GO:0005509; F:GO:0005516; F:GO:0005524; C:GO:0005634; C:GO:0005737; P:GO:0009069; F:GO:0009931; C:GO:0016021; P:GO:0018105; C:GO:0031226; P:GO:0035556; P:GO:0046777	F:calmodulin-dependent protein kinase activity; F:calcium ion binding; F:calmodulin binding; F:ATP binding; C:nucleus; C:cytoplasm; P:serine family amino acid metabolic process; F:calcium-dependent protein serine/threonine kinase activity; C:integral component of membrane; P:peptidyl-serine phosphorylation; C:intrinsic component of plasma membrane; P:intracellular signal transduction; P:protein a…	K13412	CPK; calcium-dependent protein kinase [EC:2.7.11.1]	A 9150 Organismal Systems; B 09159 Environmental adaptation; C 04626 Plant-pathogen interaction [PATH:ko04626]|A 9160 Human Diseases; B 09174 Infectious disease: parasitic; C 05145 Toxoplasmosis [PATH:ko05145]	351.832	0.343368	0.294058	1.16769	0.242932	0.346288	351.832	-0.660218	0.291602	-2.26411	0.0235676	0.0446903	351.832	-0.653673	0.291531	-2.24221	0.0249479	0.0538311	195.63	310.78	207.67	224.73	221.38	278.98	333.68	555.46	573.74	305.82	512.72	660.94
Am_Rn_030371	P:GO:0006633; C:GO:0016021; F:GO:0016747	P:fatty acid biosynthetic process; C:integral component of membrane; F:acyltransferase activity, transferring groups other than amino-acyl groups	K15397	KCS; 3-ketoacyl-CoA synthase [EC:2.3.1.199]	A 9100 Metabolism; B 09103 Lipid metabolism; C 00062 Fatty acid elongation [PATH:ko00062]|A 9150 Organismal Systems; B 09159 Environmental adaptation; C 04626 Plant-pathogen interaction [PATH:ko04626]	242.04	-10.8781	1.74648	-6.22857	4.70717e-10	3.77526e-09	242.04	-7.5387	1.75057	-4.30643	1.65912e-05	6.64281e-05	242.04	-11.1562	1.74639	-6.38814	1.67921e-10	2.3972e-09	0	0	0	818.95	436.62	14.06	76.52	32.42	14.02	997.77	549.21	96.58
Am_Rn_117381	F:GO:0003735; C:GO:0005840; P:GO:0006412; P:GO:0042254; F:GO:0046872	F:structural constituent of ribosome; C:ribosome; P:translation; P:ribosome biogenesis; F:metal ion binding	K02978	RP-S27e, RPS27; small subunit ribosomal protein S27e	A 9120 Genetic Information Processing; B 09122 Translation; C 03010 Ribosome [PATH:ko03010]|A 9160 Human Diseases; B 09172 Infectious disease: viral; C 05171 Coronavirus disease - COVID-19 [PATH:ko05171]	20.4188	8.89283	2.84963	3.12069	0.00180426	0.00473189	20.4188	8.88394	2.84963	3.11758	0.00182345	0.00461735	20.4188	8.9249	2.84963	3.13195	0.0017365	0.0053227	39	48	116	0	0	0	0	0	0	0	0	0
Am_Rn_108320	F:GO:0003723; F:GO:0003735; P:GO:0006412; C:GO:0015935; P:GO:0042254	F:RNA binding; F:structural constituent of ribosome; P:translation; C:small ribosomal subunit; P:ribosome biogenesis	K02958	RP-S15e, RPS15; small subunit ribosomal protein S15e	A 9120 Genetic Information Processing; B 09122 Translation; C 03010 Ribosome [PATH:ko03010]|A 9160 Human Diseases; B 09172 Infectious disease: viral; C 05171 Coronavirus disease - COVID-19 [PATH:ko05171]	20.0933	8.83076	2.63617	3.34984	0.000808569	0.00229071	20.0933	8.82188	2.63617	3.34647	0.000818463	0.00225753	20.0933	5.19191	2.42034	2.14512	0.0319435	0.066309	2	13	180	0	0	0	0	0	0	5	0	2
Am_Rn_118744	F:GO:0003735; C:GO:0005840; P:GO:0006412; P:GO:0042254	F:structural constituent of ribosome; C:ribosome; P:translation; P:ribosome biogenesis	K02920	RP-L36e, RPL36; large subunit ribosomal protein L36e	A 9120 Genetic Information Processing; B 09122 Translation; C 03010 Ribosome [PATH:ko03010]|A 9160 Human Diseases; B 09172 Infectious disease: viral; C 05171 Coronavirus disease - COVID-19 [PATH:ko05171]	19.9449	8.8589	2.85884	3.09877	0.00194326	0.0050612	19.9449	8.85001	2.85884	3.09566	0.00196374	0.00493792	19.9449	8.89097	2.85884	3.10999	0.00187094	0.00568777	52	38	106	0	0	0	0	0	0	0	0	0
Am_Rn_083805	C:GO:0005743; C:GO:0016021; F:GO:0022857; P:GO:0055085	C:mitochondrial inner membrane; C:integral component of membrane; F:transmembrane transporter activity; P:transmembrane transport	K05863	SLC25A4S, ANT; solute carrier family 25 (mitochondrial adenine nucleotide translocator), member 4/5/6/31	A 9130 Environmental Information Processing; B 09132 Signal transduction; C 04020 Calcium signaling pathway [PATH:ko04020]|A 9130 Environmental Information Processing; B 09132 Signal transduction; C 04022 cGMP-PKG signaling pathway [PATH:ko04022]|A 9140 Cellular Processes; B 09143 Cell growth and death; C 04217 Necroptosis [PATH:ko04217]|A 9140 Cellular Processes; B 09143 Cell growth and death; C…	19.7925	8.84791	2.89873	3.05234	0.00227066	0.00582779	19.7925	8.83902	2.89873	3.04927	0.00229396	0.00566188	19.7925	8.87998	2.89873	3.0634	0.00218835	0.00653672	31	52	115	0	0	0	0	0	0	0	0	0
Am_Rn_025649	F:GO:0000287; F:GO:0004737; C:GO:0005829; P:GO:0006094; P:GO:0006096; F:GO:0030976	F:magnesium ion binding; F:pyruvate decarboxylase activity; C:cytosol; P:gluconeogenesis; P:glycolytic process; F:thiamine pyrophosphate binding	K01568	PDC, pdc; pyruvate decarboxylase [EC:4.1.1.1]	A 9100 Metabolism; B 09101 Carbohydrate metabolism; C 00010 Glycolysis / Gluconeogenesis [PATH:ko00010]	46.5309	9.99995	2.88085	3.47118	0.000518169	0.00153112	46.5309	4.69803	2.64735	1.77462	0.0759608	0.124416	46.5309	5.6886	2.66413	2.13526	0.03274	0.0676317	266.4	109.75	42.6	0	0	0	0	0	23.72	10.76	0	0
Am_Rn_002856	C:GO:0000148; F:GO:0003843; P:GO:0005982; P:GO:0005985; P:GO:0006075; C:GO:0016021	C:1,3-beta-D-glucan synthase complex; F:1,3-beta-D-glucan synthase activity; P:starch metabolic process; P:sucrose metabolic process; P:(1->3)-beta-D-glucan biosynthetic process; C:integral component of membrane	K11000	CALS; callose synthase [EC:2.4.1.-]	None	265.147	0.942315	1.78884	0.526774	0.59835	0.70606	265.147	1.45547	1.78926	0.813448	0.415961	0.523365	265.147	0.0161182	1.78838	0.00901273	0.992809	1	723.42	0.88	116.22	222.65	67.32	345.91	0	9.55	467.35	107.69	332.51	776.17
Am_Rn_050674	F:GO:0004722; P:GO:0006470; C:GO:0008287; F:GO:0046872	F:protein serine/threonine phosphatase activity; P:protein dephosphorylation; C:protein serine/threonine phosphatase complex; F:metal ion binding	K01102	PDP; pyruvate dehydrogenase phosphatase [EC:3.1.3.43]	None	1493.28	-0.724325	0.134312	-5.39284	6.93525e-08	4.04798e-07	1493.28	-0.661854	0.134386	-4.92504	8.43441e-07	4.32916e-06	1493.28	-0.494144	0.134512	-3.67362	0.000239141	0.000931197	705.56	1000.61	938.19	1736.45	1763.47	2144.44	1585.49	1797.95	1984.64	1574.35	1858.28	1456.33
Am_Rn_123269	F:GO:0003735; C:GO:0005840; P:GO:0006412; F:GO:0016787; P:GO:0042254	F:structural constituent of ribosome; C:ribosome; P:translation; F:hydrolase activity; P:ribosome biogenesis	K02901	RP-L27e, RPL27; large subunit ribosomal protein L27e	A 9120 Genetic Information Processing; B 09122 Translation; C 03010 Ribosome [PATH:ko03010]|A 9160 Human Diseases; B 09172 Infectious disease: viral; C 05171 Coronavirus disease - COVID-19 [PATH:ko05171]	19.7086	8.83679	1.98727	4.4467	8.71993e-06	3.62447e-05	19.7086	7.86611	1.98727	3.95825	7.55004e-05	0.00026262	19.7086	8.86887	1.98727	4.46284	8.08803e-06	4.53891e-05	35	62	100	0	0	0	0	0	1	0	0	0
Am_Rn_000787	F:GO:0015276; C:GO:0016021; P:GO:0034220	F:ligand-gated ion channel activity; C:integral component of membrane; P:ion transmembrane transport	.	.	.	250.238	-9.77585	1.33087	-7.34545	2.05074e-13	2.55476e-12	250.238	-10.4695	1.3304	-7.86943	3.56255e-15	6.90093e-14	250.238	-11.1057	1.33011	-8.34945	6.85836e-17	2.67391e-15	0	0	0	159.71	286.86	172.91	247.56	302.21	478.5	220.39	1014	369.65
Am_Rn_002883	F:GO:0003676; F:GO:0003887; P:GO:0006260; F:GO:0008270; P:GO:0015074; C:GO:0042575; P:GO:0071897	F:nucleic acid binding; F:DNA-directed DNA polymerase activity; P:DNA replication; F:zinc ion binding; P:DNA integration; C:DNA polymerase complex; P:DNA biosynthetic process	K13217	PRPF39, PRP39; pre-mRNA-processing factor 39	None	287.873	-1.38872	0.769598	-1.80447	0.071158	0.122847	287.873	-1.06665	0.769885	-1.38547	0.165909	0.24395	287.873	-1.10323	0.769806	-1.43312	0.151822	0.244075	102.26	119.73	141.66	132.46	466.02	673.61	60.82	384.03	599.46	125.94	573.66	334.03
Am_Rn_002884	C:GO:0005887; P:GO:0055085	C:integral component of plasma membrane; P:transmembrane transport	K08193	SLC17A; MFS transporter, ACS family, solute carrier family 17 (sodium-dependent inorganic phosphate cotransporter), other	None	232.886	-0.132604	0.502396	-0.263943	0.791824	0.872358	232.886	0.535277	0.50379	1.0625	0.288009	0.387067	232.886	0.190872	0.502907	0.379537	0.704289	0.807051	92.12	276.61	277.87	221.64	300.38	385.42	178.77	273.78	99.65	216.82	330.97	181.38
Am_Rn_115564	F:GO:0003723; F:GO:0003735; C:GO:0005840; P:GO:0006412; P:GO:0042254	F:RNA binding; F:structural constituent of ribosome; C:ribosome; P:translation; P:ribosome biogenesis	K02875	RP-L14e, RPL14; large subunit ribosomal protein L14e	A 9120 Genetic Information Processing; B 09122 Translation; C 03010 Ribosome [PATH:ko03010]|A 9160 Human Diseases; B 09172 Infectious disease: viral; C 05171 Coronavirus disease - COVID-19 [PATH:ko05171]	19.4922	8.82583	2.86392	3.08173	0.002058	0.00533725	19.4922	8.81695	2.86392	3.07863	0.00207955	0.0051953	19.4922	8.85791	2.86392	3.09293	0.0019819	0.00598903	39	50	105	0	0	0	0	0	0	0	0	0
Am_Rn_002886	P:GO:0007165; C:GO:0016021; F:GO:0043531	P:signal transduction; C:integral component of membrane; F:ADP binding	.	.	.	195.619	-1.10125	0.601099	-1.83205	0.0669436	0.116534	195.619	0.373877	0.604142	0.618856	0.536011	0.63052	195.619	-0.418684	0.602054	-0.695425	0.486789	0.614708	108	179.3	87.78	286.2	381.27	360.12	20.94	159.41	209.58	179.83	193.79	283.12
Am_Rn_059933	F:GO:0004725; C:GO:0005634; P:GO:0006570; F:GO:0008138; F:GO:0033549; P:GO:0035335; P:GO:0043407	F:protein tyrosine phosphatase activity; C:nucleus; P:tyrosine metabolic process; F:protein tyrosine/serine/threonine phosphatase activity; F:MAP kinase phosphatase activity; P:peptidyl-tyrosine dephosphorylation; P:negative regulation of MAP kinase activity	K04459	DUSP, MKP; dual specificity MAP kinase phosphatase [EC:3.1.3.16 3.1.3.48]	A 9130 Environmental Information Processing; B 09132 Signal transduction; C 04010 MAPK signaling pathway [PATH:ko04010]|A 9150 Organismal Systems; B 09158 Development and regeneration; C 04361 Axon regeneration [PATH:ko04361]	507.388	0.200695	0.242226	0.828545	0.407362	0.525853	507.388	-0.665462	0.240636	-2.76543	0.00568483	0.0126894	507.388	-0.278665	0.241158	-1.15553	0.247875	0.363827	275.82	314.46	489.49	328.18	411.6	483.72	541.24	844.46	848.4	540.05	605.89	586.21
Am_Rn_002895	C:GO:0000148; F:GO:0003843; P:GO:0005982; P:GO:0005985; P:GO:0006075; C:GO:0016021	C:1,3-beta-D-glucan synthase complex; F:1,3-beta-D-glucan synthase activity; P:starch metabolic process; P:sucrose metabolic process; P:(1->3)-beta-D-glucan biosynthetic process; C:integral component of membrane	K11000	CALS; callose synthase [EC:2.4.1.-]	None	370.522	1.04898	0.887788	1.18157	0.237377	0.339497	370.522	0.0483985	0.886905	0.0545701	0.956481	0.976583	370.522	-0.0462248	0.88682	-0.0521242	0.95843	0.996046	106.26	549.25	440.86	8.9	260.82	421.53	339.38	471.84	519.9	549.35	399.88	494.48
Am_Rn_002910	P:GO:0006259; F:GO:0016779; F:GO:0043167; F:GO:0097159; F:GO:1901363	P:DNA metabolic process; F:nucleotidyltransferase activity; F:ion binding; F:organic cyclic compound binding; F:heterocyclic compound binding	.	.	.	234.709	-0.550444	0.562565	-0.978455	0.327849	0.442269	234.709	-0.023765	0.563443	-0.0421781	0.966357	0.983475	234.709	-0.190445	0.563053	-0.338236	0.735186	0.83249	199.18	221.47	83.52	241.29	348.45	373.45	58.61	302.23	332.67	183.61	313.35	265.1
Am_Rn_048404	F:GO:0005506; C:GO:0016021; F:GO:0016709; F:GO:0020037	F:iron ion binding; C:integral component of membrane; F:oxidoreductase activity, acting on paired donors, with incorporation or reduction of molecular oxygen, NAD(P)H as one donor, and incorporation of one atom of oxygen; F:heme binding	K17961	CYP82G1; trimethyltridecatetraene/dimethylnonatriene synthase [EC:1.14.14.58 1.14.14.59]	A 9100 Metabolism; B 09109 Metabolism of terpenoids and polyketides; C 00904 Diterpenoid biosynthesis [PATH:ko00904]	435.501	-11.3157	1.41561	-7.99347	1.31192e-15	2.13127e-14	435.501	-11.6033	1.41554	-8.19707	2.46324e-16	5.61666e-15	435.501	-11.0827	1.41567	-7.8286	4.93325e-15	1.44082e-13	0	0	0	426	560	873	92	744	1542	312	615	665
Am_Rn_002914	.	.	K13171	SRRM1, SRM160; serine/arginine repetitive matrix protein 1	A 9120 Genetic Information Processing; B 09122 Translation; C 03013 Nucleocytoplasmic transport [PATH:ko03013]|A 9120 Genetic Information Processing; B 09122 Translation; C 03015 mRNA surveillance pathway [PATH:ko03015]	498.215	-0.800517	0.450489	-1.777	0.0755689	0.129321	498.215	0.43892	0.451734	0.971634	0.331233	0.435267	498.215	0.211349	0.451361	0.468249	0.639607	0.75302	613.49	183.44	295.55	907.08	779.34	874.7	233.03	432.34	438.78	397.68	473.67	429.15
Am_Rn_025877	F:GO:0051213	F:dioxygenase activity	.	.	.	491.052	-11.4936	1.24028	-9.26695	1.9155e-20	5.02925e-19	491.052	-11.8862	1.24019	-9.58424	9.31433e-22	4.02509e-20	491.052	-11.0746	1.2404	-8.92823	4.32864e-19	2.26434e-17	0	0	0	498.08	777.6	797.8	1157.65	551.13	915.38	572.7	549.64	449.09
Am_Rn_002922	P:GO:0000244; C:GO:0046540; C:GO:0071013; P:GO:0080188; P:GO:2000630; P:GO:2000636	P:spliceosomal tri-snRNP complex assembly; C:U4/U6 x U5 tri-snRNP complex; C:catalytic step 2 spliceosome; P:gene silencing by RNA-directed DNA methylation; P:positive regulation of miRNA metabolic process; P:positive regulation of primary miRNA processing	K12855	PRPF6, PRP6; pre-mRNA-processing factor 6	A 9120 Genetic Information Processing; B 09121 Transcription; C 03040 Spliceosome [PATH:ko03040]	819.342	-0.47316	0.24795	-1.90828	0.0563546	0.100434	819.342	-0.0619283	0.248409	-0.2493	0.803129	0.858177	819.342	-0.311061	0.248073	-1.25391	0.209875	0.318043	632.97	624.34	475.87	964.96	987.84	1188.09	482.34	907.56	1005.88	751.84	1095.42	1013.99
Am_Rn_100304	F:GO:0003735; P:GO:0006412; C:GO:0015935; F:GO:0019843; P:GO:0042254	F:structural constituent of ribosome; P:translation; C:small ribosomal subunit; F:rRNA binding; P:ribosome biogenesis	K02997	RP-S9e, RPS9; small subunit ribosomal protein S9e	A 9120 Genetic Information Processing; B 09122 Translation; C 03010 Ribosome [PATH:ko03010]|A 9160 Human Diseases; B 09172 Infectious disease: viral; C 05171 Coronavirus disease - COVID-19 [PATH:ko05171]	19.5284	8.82185	2.90919	3.03241	0.00242612	0.00619195	19.5284	7.85117	2.90919	2.69875	0.0069601	0.0151947	19.5284	8.85392	2.90919	3.04343	0.00233897	0.00693429	2	15	177	0	0	0	1	0	0	0	0	0
Am_Rn_004915	P:GO:0006809; C:GO:0009325; F:GO:0009703; F:GO:0020037; F:GO:0030151; P:GO:0042128; F:GO:0043546; F:GO:0050464	P:nitric oxide biosynthetic process; C:nitrate reductase complex; F:nitrate reductase (NADH) activity; F:heme binding; F:molybdenum ion binding; P:nitrate assimilation; F:molybdopterin cofactor binding; F:nitrate reductase (NADPH) activity	K10534	NR; nitrate reductase (NAD(P)H) [EC:1.7.1.1 1.7.1.2 1.7.1.3]	A 9100 Metabolism; B 09102 Energy metabolism; C 00910 Nitrogen metabolism [PATH:ko00910]	109.427	4.5608	0.833142	5.47422	4.3944e-08	2.63448e-07	109.427	11.243	1.43007	7.86186	3.78458e-15	7.28938e-14	109.427	8.83252	1.16062	7.61017	2.73726e-14	7.27633e-13	550.43	276.15	181.72	15.16	9.64	34	0	0	0	2.74	0	0
Am_Rn_076876	F:GO:0003735; C:GO:0005840; P:GO:0006412; P:GO:0042254	F:structural constituent of ribosome; C:ribosome; P:translation; P:ribosome biogenesis	K02930	RP-L4e, RPL4; large subunit ribosomal protein L4e	A 9120 Genetic Information Processing; B 09122 Translation; C 03010 Ribosome [PATH:ko03010]|A 9160 Human Diseases; B 09172 Infectious disease: viral; C 05171 Coronavirus disease - COVID-19 [PATH:ko05171]	18.9444	8.78463	3.58433	2.45084	0.0142522	0.0300809	18.9444	8.77574	3.58433	2.44836	0.0143506	0.0288478	18.9444	8.8167	3.58433	2.45979	0.0139018	0.0325582	3	15	171	0	0	0	0	0	0	0	0	0
Am_Rn_002938	F:GO:0046872	F:metal ion binding	K22909	ZC3H13; zinc finger CCCH domain-containing protein 13	None	1288.25	-0.123198	0.138869	-0.887157	0.374994	0.492288	1288.25	0.43295	0.139618	3.10096	0.00192893	0.00485758	1288.25	0.141659	0.139136	1.01813	0.308616	0.432814	1155.28	1274.43	992.33	1483.51	1508.55	1856.07	830.79	1233.03	1236.59	1267.38	1478.19	1360.16
Am_Rn_119499	F:GO:0005509; C:GO:0005737; P:GO:0019722; F:GO:0019904	F:calcium ion binding; C:cytoplasm; P:calcium-mediated signaling; F:protein domain specific binding	K02183	CALM; calmodulin	A 9130 Environmental Information Processing; B 09132 Signal transduction; C 04016 MAPK signaling pathway - plant [PATH:ko04016]|A 9130 Environmental Information Processing; B 09132 Signal transduction; C 04014 Ras signaling pathway [PATH:ko04014]|A 9130 Environmental Information Processing; B 09132 Signal transduction; C 04015 Rap1 signaling pathway [PATH:ko04015]|A 9130 Environmental Information…	18.9098	8.78209	2.87046	3.05947	0.00221727	0.00570811	18.9098	8.7732	2.87046	3.05638	0.0022403	0.00554558	18.9098	8.81416	2.87046	3.07065	0.00213596	0.00640286	37	56.1	96	0	0	0	0	0	0	0	0	0
Am_Rn_025447	C:GO:0005886; F:GO:0015168; F:GO:0015204; F:GO:0015267; P:GO:0015793; C:GO:0016021; P:GO:0035445; F:GO:0046715; P:GO:0071918; P:GO:0080029	C:plasma membrane; F:glycerol transmembrane transporter activity; F:urea transmembrane transporter activity; F:channel activity; P:glycerol transmembrane transport; C:integral component of membrane; P:borate transmembrane transport; F:active borate transmembrane transporter activity; P:urea transmembrane transport; P:cellular response to boron-containing substance levels	K09874	NIP; aquaporin NIP	None	303.028	-10.6156	1.28592	-8.25526	1.51574e-16	2.70589e-15	303.028	-10.7552	1.28586	-8.36423	6.05099e-17	1.4924e-15	303.028	-11.0698	1.28571	-8.60984	7.31645e-18	3.2327e-16	0	0	0	406.9	306.43	410.24	345.68	478.21	409.07	937.84	363.23	255.22
Am_Rn_105126	F:GO:0003735; C:GO:0005840; P:GO:0006412; P:GO:0042254	F:structural constituent of ribosome; C:ribosome; P:translation; P:ribosome biogenesis	K02912	RP-L32e, RPL32; large subunit ribosomal protein L32e	A 9120 Genetic Information Processing; B 09122 Translation; C 03010 Ribosome [PATH:ko03010]|A 9160 Human Diseases; B 09172 Infectious disease: viral; C 05171 Coronavirus disease - COVID-19 [PATH:ko05171]	18.9028	8.78145	3.54684	2.47585	0.0132918	0.0282611	18.9028	8.77257	3.54684	2.47335	0.0133853	0.0271138	18.9028	8.81352	3.54684	2.4849	0.0129589	0.0306217	5	11	172	0	0	0	0	0	0	0	0	0
Am_Rn_035232	F:GO:0005515; C:GO:0009522; C:GO:0009523; C:GO:0009535; P:GO:0009765; C:GO:0016021; F:GO:0016168; P:GO:0018298; F:GO:0046872	F:protein binding; C:photosystem I; C:photosystem II; C:chloroplast thylakoid membrane; P:photosynthesis, light harvesting; C:integral component of membrane; F:chlorophyll binding; P:obsolete protein-chromophore linkage; F:metal ion binding	K08912	LHCB1; light-harvesting complex II chlorophyll a/b binding protein 1	A 9100 Metabolism; B 09102 Energy metabolism; C 00196 Photosynthesis - antenna proteins [PATH:ko00196]	3815.38	-11.624	0.728424	-15.9578	2.51505e-57	7.44968e-55	3815.38	-11.2062	0.728449	-15.3836	2.10772e-53	1.16917e-50	3815.38	-11.0383	0.728457	-15.1529	7.24538e-52	5.44221e-49	0	1.99	2.97	5318.38	8632.58	6219.71	4826.48	5041.04	5195.78	6189.87	4409.48	3149.39
Am_Rn_117172	F:GO:0003735; C:GO:0005840; P:GO:0006412; P:GO:0042254	F:structural constituent of ribosome; C:ribosome; P:translation; P:ribosome biogenesis	K02903	RP-L28e, RPL28; large subunit ribosomal protein L28e	A 9120 Genetic Information Processing; B 09122 Translation; C 03010 Ribosome [PATH:ko03010]|A 9160 Human Diseases; B 09172 Infectious disease: viral; C 05171 Coronavirus disease - COVID-19 [PATH:ko05171]	18.7184	8.76736	2.85639	3.06939	0.00214498	0.00553928	18.7184	8.75847	2.85639	3.06628	0.00216742	0.00539011	18.7184	8.79943	2.85639	3.08062	0.00206572	0.00621286	49	47	89	0	0	0	0	0	0	0	0	0
Am_Rn_117493	F:GO:0003735; C:GO:0005840; P:GO:0006412; P:GO:0042254	F:structural constituent of ribosome; C:ribosome; P:translation; P:ribosome biogenesis	K02910	RP-L31e, RPL31; large subunit ribosomal protein L31e	A 9120 Genetic Information Processing; B 09122 Translation; C 03010 Ribosome [PATH:ko03010]|A 9160 Human Diseases; B 09172 Infectious disease: viral; C 05171 Coronavirus disease - COVID-19 [PATH:ko05171]	18.6612	8.76295	2.92098	3.00001	0.00269975	0.00681842	18.6612	8.75407	2.92098	2.99696	0.00272683	0.0066189	18.6612	8.79503	2.92098	3.01099	0.00260401	0.00761827	39	42	104	0	0	0	0	0	0	0	0	0
Am_Rn_080711	F:GO:0046872; F:GO:0051213	F:metal ion binding; F:dioxygenase activity	.	.	.	441.89	-10.7409	1.28962	-8.32873	8.17117e-17	1.49726e-15	441.89	-12.0253	1.28923	-9.32748	1.0842e-20	4.12956e-19	441.89	-11.0098	1.28949	-8.53807	1.36478e-17	5.80261e-16	0	0	0	424.5	417.08	372.52	1540.87	634.11	637.21	512.1	647.1	339.67
Am_Rn_049902	F:GO:0004298; C:GO:0005634; C:GO:0005737; C:GO:0005839; P:GO:0010499; P:GO:0043161	F:threonine-type endopeptidase activity; C:nucleus; C:cytoplasm; C:proteasome core complex; P:proteasomal ubiquitin-independent protein catabolic process; P:proteasome-mediated ubiquitin-dependent protein catabolic process	K02732	PSMB1; 20S proteasome subunit beta 6 [EC:3.4.25.1]	A 9120 Genetic Information Processing; B 09123 Folding, sorting and degradation; C 03050 Proteasome [PATH:ko03050]|A 9160 Human Diseases; B 09164 Neurodegenerative disease; C 05010 Alzheimer disease [PATH:ko05010]|A 9160 Human Diseases; B 09164 Neurodegenerative disease; C 05012 Parkinson disease [PATH:ko05012]|A 9160 Human Diseases; B 09164 Neurodegenerative disease; C 05014 Amyotrophic lateral …	573.401	-0.059259	0.206492	-0.286979	0.774128	0.858114	573.401	-0.667529	0.205455	-3.24902	0.00115802	0.00307752	573.401	-0.015088	0.20651	-0.0730618	0.941757	0.984085	409.59	420.44	392.87	461.2	522.48	687.15	797.91	798.29	908.46	398.86	636.24	608.08
Am_Rn_077749	.	.	.	.	.	19.8728	4.66636	1.70781	2.73236	0.00628816	0.0145	19.8728	5.30605	1.74425	3.04202	0.00234998	0.00578844	19.8728	8.79439	2.02067	4.35222	1.34766e-05	7.16874e-05	128.76	46.35	1	3	6	0	2	2	2	0	0	0
Am_Rn_002985	.	.	.	.	.	381.506	0.868886	0.426991	2.03491	0.0418603	0.0776976	381.506	0.516993	0.426394	1.21248	0.22533	0.315711	381.506	0.197453	0.425888	0.463625	0.642916	0.755722	187.5	596.29	465.91	285.13	265.54	311.13	168.1	401.95	567.12	501.29	379.15	524.31
Am_Rn_083855	P:GO:0000463; F:GO:0003735; C:GO:0022625	P:maturation of LSU-rRNA from tricistronic rRNA transcript (SSU-rRNA, 5.8S rRNA, LSU-rRNA); F:structural constituent of ribosome; C:cytosolic large ribosomal subunit	K02937	RP-L7e, RPL7; large subunit ribosomal protein L7e	A 9120 Genetic Information Processing; B 09122 Translation; C 03010 Ribosome [PATH:ko03010]|A 9160 Human Diseases; B 09172 Infectious disease: viral; C 05171 Coronavirus disease - COVID-19 [PATH:ko05171]	18.6471	8.76192	2.89616	3.02536	0.0024834	0.00632279	18.6471	8.75303	2.89616	3.02229	0.00250871	0.00614222	18.6471	8.79399	2.89616	3.03643	0.00239397	0.00708086	33	58	96	0	0	0	0	0	0	0	0	0
Am_Rn_002998	F:GO:0004722; P:GO:0006470; C:GO:0008287; F:GO:0046872	F:protein serine/threonine phosphatase activity; P:protein dephosphorylation; C:protein serine/threonine phosphatase complex; F:metal ion binding	.	.	.	355.475	0.652273	0.394838	1.652	0.0985344	0.162514	355.475	0.748117	0.395038	1.89378	0.0582537	0.0987643	355.475	0.738299	0.394929	1.86945	0.0615606	0.115098	382.75	204.28	637.67	338.42	293.49	400.91	328.44	276.49	345.45	344.23	318.93	325.21
Am_Rn_011692	F:GO:0004506; C:GO:0005783; C:GO:0016021; P:GO:0016114; P:GO:0016126; F:GO:0050660	F:squalene monooxygenase activity; C:endoplasmic reticulum; C:integral component of membrane; P:terpenoid biosynthetic process; P:sterol biosynthetic process; F:flavin adenine dinucleotide binding	K00511	SQLE, ERG1; squalene monooxygenase [EC:1.14.14.17]	A 9100 Metabolism; B 09103 Lipid metabolism; C 00100 Steroid biosynthesis [PATH:ko00100]|A 9100 Metabolism; B 09109 Metabolism of terpenoids and polyketides; C 00909 Sesquiterpenoid and triterpenoid biosynthesis [PATH:ko00909]	550.575	-11.5752	1.22759	-9.42922	4.13144e-21	1.16279e-19	550.575	-12.239	1.22745	-9.97106	2.04033e-23	1.0807e-21	550.575	-10.973	1.22778	-8.93726	3.98949e-19	2.10573e-17	0	0	0	503.93	891.52	790.64	1384.34	999.89	972.25	510.15	541.22	413.56
Am_Rn_003006	F:GO:0015267; C:GO:0016021; P:GO:0055085	F:channel activity; C:integral component of membrane; P:transmembrane transport	K09873	TIP; aquaporin TIP	None	336.925	-0.257154	0.438788	-0.586055	0.557839	0.669358	336.925	-0.414473	0.438608	-0.944974	0.344672	0.449891	336.925	0.84027	0.440826	1.90613	0.0566339	0.107304	359.44	171.03	266.56	374.31	322.43	592.48	566.43	326.65	484.4	200.94	130.34	277.41
Am_Rn_003007	F:GO:0004672; F:GO:0005524; P:GO:0006468	F:protein kinase activity; F:ATP binding; P:protein phosphorylation	K17601	WDR81; WD repeat-containing protein 81	None	233.271	-1.18833	1.48486	-0.800294	0.423541	0.541885	233.271	-0.128497	1.48555	-0.0864981	0.93107	0.957625	233.271	-0.771213	1.48505	-0.519317	0.603539	0.7209	138.21	250.64	0.9	356.52	379.8	385.22	0	272.28	304.35	137.45	291.08	439.68
Am_Rn_056695	.	.	.	.	.	615.274	6.74043	0.977216	6.89759	5.28932e-12	5.48511e-11	615.274	1.8632	0.959104	1.94265	0.052059	0.089591	615.274	8.7901	1.03213	8.51643	1.64542e-17	6.95539e-16	245	1932	2724.02	7	10	44	371	828.16	503	11	3	0
Am_Rn_099946	.	.	.	.	.	36.1134	9.70845	1.42382	6.81859	9.19355e-12	9.25085e-11	36.1134	8.73777	1.42382	6.13685	8.41736e-10	7.46744e-09	36.1134	8.77873	1.42382	6.16562	7.02084e-10	8.99687e-09	127.17	91.62	133.01	0	0	0	1	0	0	1	0	0
Am_Rn_089681	F:GO:0003735; C:GO:0005840; P:GO:0006412; P:GO:0042254	F:structural constituent of ribosome; C:ribosome; P:translation; P:ribosome biogenesis	K02934	RP-L6e, RPL6; large subunit ribosomal protein L6e	A 9120 Genetic Information Processing; B 09122 Translation; C 03010 Ribosome [PATH:ko03010]|A 9160 Human Diseases; B 09172 Infectious disease: viral; C 05171 Coronavirus disease - COVID-19 [PATH:ko05171]	18.3901	8.74179	3.50158	2.49652	0.0125417	0.0268646	18.3901	8.7329	3.50158	2.49399	0.0126317	0.025778	18.3901	8.77386	3.50158	2.50568	0.0122215	0.0291259	6	13	164	0	0	0	0	0	0	0	0	0
Am_Rn_003024	C:GO:0005773; P:GO:0009793; P:GO:0051781	C:vacuole; P:embryo development ending in seed dormancy; P:positive regulation of cell division	K01205	NAGLU; alpha-N-acetylglucosaminidase [EC:3.2.1.50]	A 9100 Metabolism; B 09107 Glycan biosynthesis and metabolism; C 00531 Glycosaminoglycan degradation [PATH:ko00531]|A 9140 Cellular Processes; B 09141 Transport and catabolism; C 04142 Lysosome [PATH:ko04142]	1080.9	-6.05013	1.38548	-4.36681	NA	NA	1080.9	-3.62462	1.38582	-2.61551	NA	NA	1080.9	-3.70565	1.38578	-2.67405	NA	NA	104.58	0	0	3645.69	2221.47	4158.7	503.73	594.99	759.43	663.42	526.27	816.61
Am_Rn_088664	F:GO:0003746; C:GO:0005840; C:GO:0005853; P:GO:0006448	F:translation elongation factor activity; C:ribosome; C:eukaryotic translation elongation factor 1 complex; P:regulation of translational elongation	K03232	EEF1B; elongation factor 1-beta	None	18.37	8.74021	3.52099	2.48231	0.0130532	0.0278159	18.37	8.73133	3.52099	2.47979	0.0131459	0.0267006	18.37	8.77229	3.52099	2.49142	0.0127232	0.0301378	5	14	164	0	0	0	0	0	0	0	0	0
Am_Rn_098418	F:GO:0003723; F:GO:0003735; P:GO:0006412; C:GO:0015935; P:GO:0042254	F:RNA binding; F:structural constituent of ribosome; P:translation; C:small ribosomal subunit; P:ribosome biogenesis	K02985	RP-S3e, RPS3; small subunit ribosomal protein S3e	A 9120 Genetic Information Processing; B 09122 Translation; C 03010 Ribosome [PATH:ko03010]|A 9160 Human Diseases; B 09172 Infectious disease: viral; C 05171 Coronavirus disease - COVID-19 [PATH:ko05171]|A 9160 Human Diseases; B 09171 Infectious disease: bacterial; C 05130 Pathogenic Escherichia coli infection [PATH:ko05130]|A 9160 Human Diseases; B 09171 Infectious disease: bacterial; C 05132 Sa…	18.35	8.73311	2.23019	3.91586	9.00826e-05	0.000312027	18.35	7.76243	2.23019	3.48061	0.000500265	0.00144971	18.35	8.76518	2.23019	3.93024	8.48606e-05	0.000371697	43	23	113	0	0	0	0	0	1	0	0	0
Am_Rn_003041	F:GO:0005524	F:ATP binding	K09486	HYOU1; hypoxia up-regulated 1	A 9120 Genetic Information Processing; B 09123 Folding, sorting and degradation; C 04141 Protein processing in endoplasmic reticulum [PATH:ko04141]	624.06	-0.326644	0.592976	-0.550855	0.581733	0.691152	624.06	-0.942876	0.592635	-1.59099	0.111612	0.173636	624.06	-0.60213	0.592782	-1.01577	0.309739	0.433942	136.2	702.84	300.21	393.74	731.87	646.24	318.89	1307.75	1180.11	482.65	668.96	1049.09
Am_Rn_003043	F:GO:0000247; F:GO:0004769; C:GO:0005783; C:GO:0005886; P:GO:0008207; P:GO:0008209; P:GO:0008210; C:GO:0016021; P:GO:0016126; F:GO:0047750	F:C-8 sterol isomerase activity; F:steroid delta-isomerase activity; C:endoplasmic reticulum; C:plasma membrane; P:C21-steroid hormone metabolic process; P:androgen metabolic process; P:estrogen metabolic process; C:integral component of membrane; P:sterol biosynthetic process; F:cholestenol delta-isomerase activity	K01824	EBP; cholestenol Delta-isomerase [EC:5.3.3.5]	A 9100 Metabolism; B 09103 Lipid metabolism; C 00100 Steroid biosynthesis [PATH:ko00100]	250.795	-0.10073	0.625741	-0.160977	0.872112	0.934867	250.795	-0.786406	0.624754	-1.25874	0.208123	0.29518	250.795	-0.743846	0.624747	-1.19064	0.233797	0.347005	87.92	231.2	148.17	89.73	393.62	136.12	415.15	393.84	167.71	330.32	404.05	271.46
Am_Rn_003047	F:GO:0005524	F:ATP binding	.	.	.	289.466	12.7145	3.28986	3.86475	NA	NA	289.466	9.18435	3.12502	2.93897	NA	NA	289.466	10.2797	3.18088	3.23171	NA	NA	2465.68	63.1	83.74	0	0	0	0	0	6.9	3.03	0	0
Am_Rn_037125	C:GO:0009523; C:GO:0009535; P:GO:0015979; C:GO:0016021; P:GO:0042549	C:photosystem II; C:chloroplast thylakoid membrane; P:photosynthesis; C:integral component of membrane; P:photosystem II stabilization	K13648	GAUT; alpha-1,4-galacturonosyltransferase [EC:2.4.1.43]	A 9100 Metabolism; B 09101 Carbohydrate metabolism; C 00520 Amino sugar and nucleotide sugar metabolism [PATH:ko00520]	740.544	-13.4636	1.30152	-10.3445	4.43121e-25	1.7765e-23	740.544	-4.30113	1.35732	-3.16883	0.00153052	0.0039545	740.544	-10.9625	1.30197	-8.41994	3.76673e-17	1.50947e-15	0	0	0	2103.69	2647.95	3414.99	6.13	0	7.68	539.28	653.99	253.55
Am_Rn_003067	F:GO:0001664; F:GO:0003924; F:GO:0005525; C:GO:0005834; P:GO:0007188; F:GO:0031683	F:G protein-coupled receptor binding; F:GTPase activity; F:GTP binding; C:heterotrimeric G-protein complex; P:adenylate cyclase-modulating G protein-coupled receptor signaling pathway; F:G-protein beta/gamma-subunit complex binding	.	.	.	318.148	0.677385	1.22881	0.551255	0.581459	0.690988	318.148	-0.478687	1.22782	-0.389868	0.696634	0.769696	318.148	-1.26636	1.22746	-1.03169	0.302217	0.425598	179	178.36	222.69	50.12	158.66	280.64	0	479.41	646.61	597.24	495.69	766.69
Am_Rn_003070	F:GO:0005524	F:ATP binding	.	.	.	159.195	-1.01921	0.527762	-1.9312	0.0534586	0.0959506	159.195	-0.136575	0.530069	-0.257655	0.796673	0.852831	159.195	-0.596964	0.528587	-1.12936	0.258747	0.376334	105.38	137.52	38.72	310.15	266.83	138.74	156.26	136.84	93.67	179.42	208.5	172.77
Am_Rn_114043	F:GO:0003677	F:DNA binding	.	.	.	22.9513	7.78547	2.89167	2.69238	0.00709441	0.0161621	22.9513	8.73838	2.89167	3.02191	0.00251181	0.00614771	22.9513	2.06622	2.64767	0.78039	0.435161	0.564703	115.14	62.23	0	0	1	0	0	0	0	19.85	37.36	0
Am_Rn_008550	F:GO:0003885; C:GO:0016020; P:GO:0019852; F:GO:0050105; F:GO:0071949	F:D-arabinono-1,4-lactone oxidase activity; C:membrane; P:L-ascorbic acid metabolic process; F:L-gulonolactone oxidase activity; F:FAD binding	K00103	GULO; L-gulonolactone oxidase [EC:1.1.3.8]	A 9100 Metabolism; B 09101 Carbohydrate metabolism; C 00053 Ascorbate and aldarate metabolism [PATH:ko00053]	204.413	8.94888	1.12494	7.95498	1.79163e-15	2.84396e-14	204.413	5.36647	0.946868	5.6676	1.44808e-08	1.02911e-07	204.413	8.7602	1.09922	7.96947	1.59356e-15	5.01956e-14	421.46	305.47	1230.37	5	0	0	18.16	18	25.83	0	4.62	1
Am_Rn_090257	.	.	.	.	.	18.9418	8.72556	2.0397	4.27786	1.88698e-05	7.39499e-05	18.9418	4.59927	1.72945	2.65938	0.00782855	0.0168757	18.9418	8.75763	2.0397	4.29359	1.75811e-05	9.07698e-05	22	10	147.36	0	0	0	6	1	1.89	0	0	0
Am_Rn_096601	.	.	K01527	EGD1, BTF3; nascent polypeptide-associated complex subunit beta	A 9140 Cellular Processes; B 09143 Cell growth and death; C 04214 Apoptosis - fly [PATH:ko04214]	18.0883	8.71799	2.92549	2.98	0.00288244	0.00722756	18.0883	8.7091	2.92549	2.97697	0.00291115	0.00701661	18.0883	8.75006	2.92549	2.99097	0.00278094	0.00806744	37	47	96	0	0	0	0	0	0	0	0	0
Am_Rn_048508	.	.	.	.	.	159.609	-8.83579	1.21634	-7.26423	3.75157e-13	4.51506e-12	159.609	-9.02103	1.21604	-7.41834	1.18594e-13	1.86505e-12	159.609	-10.8851	1.21433	-8.96384	3.13574e-19	1.67625e-17	0	0	0	100	123	102	122	116	130	530	506	340
Am_Rn_083703	F:GO:0003735; P:GO:0006412; C:GO:0022627; P:GO:0042254	F:structural constituent of ribosome; P:translation; C:cytosolic small ribosomal subunit; P:ribosome biogenesis	K02984	RP-S3Ae, RPS3A; small subunit ribosomal protein S3Ae	A 9120 Genetic Information Processing; B 09122 Translation; C 03010 Ribosome [PATH:ko03010]|A 9160 Human Diseases; B 09172 Infectious disease: viral; C 05171 Coronavirus disease - COVID-19 [PATH:ko05171]	34.9808	9.66633	2.57896	3.74815	0.000178146	0.000581786	34.9808	9.65745	2.57896	3.7447	0.000180608	0.000579957	34.9808	8.73662	2.57896	3.38765	0.000704951	0.00241164	7	27	314	0	0	0	0	0	0	1	0	0
Am_Rn_105349	F:GO:0003735; P:GO:0006412; C:GO:0015934; P:GO:0042254	F:structural constituent of ribosome; P:translation; C:large ribosomal subunit; P:ribosome biogenesis	K02872	RP-L13Ae, RPL13A; large subunit ribosomal protein L13Ae	A 9120 Genetic Information Processing; B 09122 Translation; C 03010 Ribosome [PATH:ko03010]|A 9160 Human Diseases; B 09172 Infectious disease: viral; C 05171 Coronavirus disease - COVID-19 [PATH:ko05171]	17.6613	8.67786	2.09811	4.13603	3.53363e-05	0.000132377	17.6613	7.70718	2.09811	3.67339	0.000239356	0.000748822	17.6613	8.70993	2.09811	4.15132	3.30564e-05	0.000159927	34	42.92	98	0	0	0	0	0	1	0	0	0
Am_Rn_006932	F:GO:0004842; P:GO:0016567	F:ubiquitin-protein transferase activity; P:protein ubiquitination	.	.	.	216.986	-2.95799	1.32355	-2.23489	0.0254247	0.0502905	216.986	8.69265	1.77149	4.90697	9.24957e-07	4.71662e-06	216.986	-1.75061	1.3241	-1.32211	0.186132	0.288327	14.13	171.74	6.35	600.49	598.7	577.63	0	0	0	669.36	24.08	86.56
Am_Rn_079521	P:GO:0000413; F:GO:0003723; F:GO:0003755; C:GO:0005634; C:GO:1990904	P:protein peptidyl-prolyl isomerization; F:RNA binding; F:peptidyl-prolyl cis-trans isomerase activity; C:nucleus; C:ribonucleoprotein complex	.	.	.	222.668	-0.311249	0.19443	-1.60083	0.109414	0.177569	222.668	-0.670124	0.192808	-3.47561	0.00050969	0.00147437	222.668	-0.214347	0.19476	-1.10057	0.271084	0.390785	147	169.26	127.29	221.92	218.3	274.34	317.22	300.45	281.45	219.31	213.76	247.24
Am_Rn_055174	F:GO:0004497; F:GO:0005506; C:GO:0016021; F:GO:0016705; F:GO:0020037	F:monooxygenase activity; F:iron ion binding; C:integral component of membrane; F:oxidoreductase activity, acting on paired donors, with incorporation or reduction of molecular oxygen; F:heme binding	.	.	.	796.65	-10.7499	1.20859	-8.89464	5.8609e-19	1.34444e-17	796.65	-13.3886	1.208	-11.0833	1.51222e-28	1.31818e-26	796.65	-10.8719	1.20851	-8.99606	2.33967e-19	1.27632e-17	0	0	0	373	432	425	2058	2792	2838	547	293	532
Am_Rn_063129	F:GO:0004842; C:GO:0005634; C:GO:0005737; P:GO:0016567; F:GO:0016874; C:GO:0034657; P:GO:0043161	F:ubiquitin-protein transferase activity; C:nucleus; C:cytoplasm; P:protein ubiquitination; F:ligase activity; C:GID complex; P:proteasome-mediated ubiquitin-dependent protein catabolic process	K23333	RMND5; E3 ubiquitin-protein transferase RMND5 [EC:2.3.2.27]	None	485.922	-0.279549	0.173214	-1.6139	0.10655	0.173697	485.922	-0.671959	0.172339	-3.89904	9.65744e-05	0.000329022	485.922	0.107142	0.174248	0.614884	0.538631	0.662774	280	386	359	485	458	674	543	773	796	367.93	489	394
Am_Rn_115358	F:GO:0003735; C:GO:0005840; P:GO:0006412; P:GO:0042254	F:structural constituent of ribosome; C:ribosome; P:translation; P:ribosome biogenesis	K02891	RP-L22e, RPL22; large subunit ribosomal protein L22e	A 9120 Genetic Information Processing; B 09122 Translation; C 03010 Ribosome [PATH:ko03010]|A 9160 Human Diseases; B 09172 Infectious disease: viral; C 05171 Coronavirus disease - COVID-19 [PATH:ko05171]	17.6691	8.67676	3.11804	2.78276	0.00538991	0.0126649	17.6691	7.70608	3.11804	2.47145	0.0134567	0.027243	17.6691	8.70883	3.11804	2.79304	0.00522146	0.0139662	1	8	166	0	0	0	1	0	0	0	0	0
Am_Rn_092116	C:GO:0016021; F:GO:0016491	C:integral component of membrane; F:oxidoreductase activity	K14332	psaO; photosystem I subunit PsaO	A 9100 Metabolism; B 09102 Energy metabolism; C 00195 Photosynthesis [PATH:ko00195]	1371.22	-11.4524	1.06093	-10.7947	3.64703e-27	1.71444e-25	1371.22	-11.122	1.06097	-10.4829	1.03546e-25	6.94301e-24	1371.22	-10.8255	1.061	-10.2031	1.92052e-24	1.84458e-22	0	2.18	0	1646.21	2732.5	2895.43	2153.27	1692.41	1763.09	1714.79	1592.42	1459.43
Am_Rn_035171	F:GO:0042393	F:histone binding	.	.	.	617.685	-0.992664	0.258521	-3.83978	0.000123144	0.000415183	617.685	-0.672451	0.258912	-2.59722	0.00939817	0.0198456	617.685	-0.405153	0.259223	-1.56295	0.118063	0.198664	274.07	519.83	262.58	882.6	804.73	992.51	478.02	867.98	821.88	532.37	663.15	625.03
Am_Rn_003132	F:GO:0003746; C:GO:0005840; P:GO:0006139; P:GO:0006448; F:GO:0008270; P:GO:0032968	F:translation elongation factor activity; C:ribosome; P:nucleobase-containing compound metabolic process; P:regulation of translational elongation; F:zinc ion binding; P:positive regulation of transcription elongation by RNA polymerase II	K11292	SUPT6H, SPT6; transcription elongation factor SPT6	None	432.705	-0.87607	0.812884	-1.07773	0.281154	0.390625	432.705	-0.526603	0.813158	-0.647602	0.517242	0.617294	432.705	-1.74464	0.812437	-2.14742	0.0317601	0.0659658	23.77	509.15	74.8	409.84	446.75	482.71	156.17	420.88	509.38	539.59	767.28	1209.11
Am_Rn_119276	F:GO:0003723; F:GO:0003735; P:GO:0006412; C:GO:0015935; P:GO:0042254	F:RNA binding; F:structural constituent of ribosome; P:translation; C:small ribosomal subunit; P:ribosome biogenesis	K02969	RP-S20e, RPS20; small subunit ribosomal protein S20e	A 9120 Genetic Information Processing; B 09122 Translation; C 03010 Ribosome [PATH:ko03010]|A 9160 Human Diseases; B 09172 Infectious disease: viral; C 05171 Coronavirus disease - COVID-19 [PATH:ko05171]	17.548	8.67416	2.91456	2.97615	0.00291891	0.00730781	17.548	8.66527	2.91456	2.9731	0.00294806	0.0070966	17.548	8.70623	2.91456	2.98716	0.00281586	0.00815257	56	40	76	0	0	0	0	0	0	0	0	0
Am_Rn_009971	F:GO:0003735; C:GO:0005840; P:GO:0006412; P:GO:0042254	F:structural constituent of ribosome; C:ribosome; P:translation; P:ribosome biogenesis	K02866	RP-L10e, RPL10; large subunit ribosomal protein L10e	A 9120 Genetic Information Processing; B 09122 Translation; C 03010 Ribosome [PATH:ko03010]|A 9160 Human Diseases; B 09172 Infectious disease: viral; C 05171 Coronavirus disease - COVID-19 [PATH:ko05171]	2169.73	7.02528	1.10637	6.34987	2.155e-10	1.81321e-09	2169.73	5.23848	1.10313	4.74876	2.04672e-06	9.7935e-06	2169.73	8.70425	1.11603	7.79933	6.22356e-15	1.78389e-13	7800.26	1188.45	11072.8	93.68	0	119.45	184.79	331.74	193.8	21.4	21.01	23.84
Am_Rn_003145	P:GO:0000055; P:GO:0000056; F:GO:0005049; C:GO:0005634; C:GO:0005737; P:GO:0006886; P:GO:0007165; P:GO:0046825	P:ribosomal large subunit export from nucleus; P:ribosomal small subunit export from nucleus; F:nuclear export signal receptor activity; C:nucleus; C:cytoplasm; P:intracellular protein transport; P:signal transduction; P:regulation of protein export from nucleus	K14290	XPO1, CRM1; exportin-1	A 9120 Genetic Information Processing; B 09122 Translation; C 03013 Nucleocytoplasmic transport [PATH:ko03013]|A 9120 Genetic Information Processing; B 09122 Translation; C 03008 Ribosome biogenesis in eukaryotes [PATH:ko03008]|A 9130 Environmental Information Processing; B 09132 Signal transduction; C 04013 MAPK signaling pathway - fly [PATH:ko04013]|A 9160 Human Diseases; B 09172 Infectious dis…	698.779	-0.846205	0.499213	-1.69508	0.0900609	0.150442	698.779	-0.240221	0.499599	-0.480829	0.630638	0.713391	698.779	-0.663404	0.49929	-1.32869	0.183949	0.285641	712.56	303.91	183.66	955.04	776.33	1196.41	656.59	541.74	682.73	1056.62	569.79	990.3
Am_Rn_118524	F:GO:0003735; C:GO:0005840; P:GO:0006412; P:GO:0042254	F:structural constituent of ribosome; C:ribosome; P:translation; P:ribosome biogenesis	K02893	RP-L23Ae, RPL23A; large subunit ribosomal protein L23Ae	A 9120 Genetic Information Processing; B 09122 Translation; C 03010 Ribosome [PATH:ko03010]|A 9160 Human Diseases; B 09172 Infectious disease: viral; C 05171 Coronavirus disease - COVID-19 [PATH:ko05171]	17.5659	8.66422	2.16364	4.00447	6.21562e-05	0.000222078	17.5659	6.89071	2.09879	3.28318	0.00102643	0.0027614	17.5659	8.6963	2.16364	4.0193	5.83723e-05	0.000266556	36.29	51.8	85.91	0	0	0	0	0	2	0	0	0
Am_Rn_082032	.	.	.	.	.	35.2451	9.62319	1.381	6.96827	3.2086e-12	3.43719e-11	35.2451	4.7024	0.80319	5.85465	4.78011e-09	3.71558e-08	35.2451	8.69347	1.381	6.29505	3.07304e-10	4.18122e-09	133.56	114.94	83.83	0	0	0	2.2	10	5	0	0	1
Am_Rn_088878	F:GO:0003735; C:GO:0005840; P:GO:0006412; P:GO:0042254	F:structural constituent of ribosome; C:ribosome; P:translation; P:ribosome biogenesis	K02910	RP-L31e, RPL31; large subunit ribosomal protein L31e	A 9120 Genetic Information Processing; B 09122 Translation; C 03010 Ribosome [PATH:ko03010]|A 9160 Human Diseases; B 09172 Infectious disease: viral; C 05171 Coronavirus disease - COVID-19 [PATH:ko05171]	17.2304	8.64781	3.62216	2.38747	0.0169647	0.0351256	17.2304	8.63893	3.62216	2.38502	0.0170782	0.0336437	17.2304	8.67988	3.62216	2.39633	0.0165603	0.0378554	3	15	154	0	0	0	0	0	0	0	0	0
Am_Rn_112605	F:GO:0003735; C:GO:0005840; P:GO:0006412; P:GO:0042254	F:structural constituent of ribosome; C:ribosome; P:translation; P:ribosome biogenesis	K02927	RP-L40e, RPL40, UBA52; ubiquitin-large subunit ribosomal protein L40e	A 9120 Genetic Information Processing; B 09122 Translation; C 03010 Ribosome [PATH:ko03010]|A 9120 Genetic Information Processing; B 09123 Folding, sorting and degradation; C 04120 Ubiquitin mediated proteolysis [PATH:ko04120]|A 9140 Cellular Processes; B 09141 Transport and catabolism; C 04137 Mitophagy - animal [PATH:ko04137]|A 9160 Human Diseases; B 09172 Infectious disease: viral; C 05171 Cor…	17.1589	8.64189	2.97472	2.90511	0.00367122	0.00896975	17.1589	8.63301	2.97472	2.90212	0.00370641	0.00869503	17.1589	8.67397	2.97472	2.91589	0.00354671	0.00999589	34	46.01	91	0	0	0	0	0	0	0	0	0
Am_Rn_068153	P:GO:0006401; C:GO:0055087	P:RNA catabolic process; C:Ski complex	K12600	SKI3, TTC37; superkiller protein 3	A 9120 Genetic Information Processing; B 09123 Folding, sorting and degradation; C 03018 RNA degradation [PATH:ko03018]	280.779	-0.376443	0.283353	-1.32853	0.184002	0.274702	280.779	-0.673048	0.282588	-2.38173	0.0172314	0.0338986	280.779	-0.616605	0.282609	-2.18183	0.0291217	0.0614133	128	207.93	182.77	252.99	278	337.49	442.3	280.05	305.65	325.84	365.27	351.2
Am_Rn_003156	F:GO:0005524	F:ATP binding	.	.	.	191.635	0.544637	0.609521	0.893548	0.371564	0.489023	191.635	0.568705	0.609607	0.932904	0.350869	0.456626	191.635	0.0602504	0.608501	0.0990146	0.921127	0.969478	262.86	258.93	47.95	130.19	188.78	191.77	81.68	212.41	219.9	148.13	313.28	267.87
Am_Rn_101601	F:GO:0003735; C:GO:0005840; P:GO:0006412; P:GO:0042254	F:structural constituent of ribosome; C:ribosome; P:translation; P:ribosome biogenesis	K02978	RP-S27e, RPS27; small subunit ribosomal protein S27e	A 9120 Genetic Information Processing; B 09122 Translation; C 03010 Ribosome [PATH:ko03010]|A 9160 Human Diseases; B 09172 Infectious disease: viral; C 05171 Coronavirus disease - COVID-19 [PATH:ko05171]	33.4761	9.60275	2.65322	3.61928	0.000295423	0.000921017	33.4761	9.59386	2.65322	3.61593	0.00029927	0.000913498	33.4761	8.67303	2.65322	3.26887	0.00107978	0.003506	5	24	304	0	0	0	0	0	0	1	0	0
Am_Rn_073639	C:GO:0005886; C:GO:0016021; P:GO:0034219; F:GO:0051119	C:plasma membrane; C:integral component of membrane; P:carbohydrate transmembrane transport; F:sugar transmembrane transporter activity	K15382	SLC50A, SWEET; solute carrier family 50 (sugar transporter)	None	452.999	3.40373	1.39793	2.43484	0.0148984	0.0313014	452.999	-1.93689	1.39139	-1.39205	0.163907	0.241471	452.999	8.66809	1.62369	5.33852	9.3708e-08	8.04302e-07	185.31	54.5	658.55	0	102.47	4.99	1217.54	1462.96	1869.13	0	0.9	2
Am_Rn_003169	F:GO:0004252; P:GO:0006508	F:serine-type endopeptidase activity; P:proteolysis	K22686	NMA111; pro-apoptotic serine protease NMA111 [EC:3.4.21.-]	None	1036.15	-0.275655	0.388913	-0.708782	0.47846	0.595105	1036.15	-0.0258553	0.389061	-0.0664556	0.947015	0.969254	1036.15	-0.297102	0.388884	-0.763987	0.444875	0.574071	319.78	1345.96	733.22	1000.47	1231.75	1405.86	710.8	1158.92	1205.55	1068.41	1212.52	1481.6
Am_Rn_063672	P:GO:0015919; C:GO:0016021; F:GO:0016301; P:GO:0016310	P:peroxisomal membrane transport; C:integral component of membrane; F:kinase activity; P:phosphorylation	.	.	.	110.79	-0.393501	0.226257	-1.73917	0.0820043	0.138723	110.79	-0.674367	0.224136	-3.00874	0.00262332	0.00639664	110.79	-0.158229	0.228099	-0.693686	0.487879	0.615766	59.71	98.13	62.76	133.5	102.31	136.95	132.92	157.55	159.6	112.11	109.78	100.84
Am_Rn_012449	C:GO:0005829; P:GO:0006094; F:GO:0008964; C:GO:0009507; P:GO:0015977; P:GO:0015979; P:GO:0019643; C:GO:0048046; P:GO:0048366	C:cytosol; P:gluconeogenesis; F:phosphoenolpyruvate carboxylase activity; C:chloroplast; P:carbon fixation; P:photosynthesis; P:reductive tricarboxylic acid cycle; C:apoplast; P:leaf development	K01595	ppc; phosphoenolpyruvate carboxylase [EC:4.1.1.31]	A 9100 Metabolism; B 09101 Carbohydrate metabolism; C 00620 Pyruvate metabolism [PATH:ko00620]|A 9100 Metabolism; B 09102 Energy metabolism; C 00710 Carbon fixation in photosynthetic organisms [PATH:ko00710]|A 9100 Metabolism; B 09102 Energy metabolism; C 00720 Carbon fixation pathways in prokaryotes [PATH:ko00720]|A 9100 Metabolism; B 09102 Energy metabolism; C 00680 Methane metabolism [PATH:ko0…	3718.44	-0.330807	0.237334	-1.39385	0.163364	0.249192	3718.44	-0.674878	0.237265	-2.84441	0.00444936	0.0102249	3718.44	0.443213	0.237558	1.86571	0.0620826	0.115978	1950.26	2532.07	3589.55	4336.42	3845.62	4959.98	5081.32	5567.41	5880.5	2175	2307.94	3380.42
Am_Rn_109725	F:GO:0003735; F:GO:0004198; C:GO:0005840; P:GO:0006412; P:GO:0006508; P:GO:0042254	F:structural constituent of ribosome; F:calcium-dependent cysteine-type endopeptidase activity; C:ribosome; P:translation; P:proteolysis; P:ribosome biogenesis	K02870	RP-L12e, RPL12; large subunit ribosomal protein L12e	A 9120 Genetic Information Processing; B 09122 Translation; C 03010 Ribosome [PATH:ko03010]|A 9160 Human Diseases; B 09172 Infectious disease: viral; C 05171 Coronavirus disease - COVID-19 [PATH:ko05171]	16.812	8.6124	3.02121	2.85065	0.00436306	0.0104887	16.812	8.60352	3.02121	2.8477	0.00440358	0.010137	16.812	8.64448	3.02121	2.86126	0.00421959	0.0116021	33	39	95	0	0	0	0	0	0	0	0	0
Am_Rn_003191	C:GO:0000502; P:GO:0043248; F:GO:0060090	C:proteasome complex; P:proteasome assembly; F:molecular adaptor activity	K11886	ECM29; proteasome component ECM29	None	869.917	-0.126539	0.413553	-0.305981	0.759619	0.846464	869.917	0.530064	0.414012	1.28031	0.200436	0.286074	869.917	0.0224227	0.413616	0.0542115	0.956767	0.994801	516.32	1124.73	700.72	983.1	1079.21	1183.4	259.64	938.23	929.73	733.01	973.84	1293.04
Am_Rn_003196	.	.	.	.	.	1294.39	0.82624	0.462312	1.78719	0.0739068	0.126939	1294.39	0.894457	0.462355	1.93457	0.0530434	0.0910743	1294.39	0.0128759	0.461981	0.027871	0.977765	1	1191.08	903.51	2016.73	919.66	1149.78	944.45	1330.61	758.95	676.13	2250.52	2027.8	1133.67
Am_Rn_003197	F:GO:0004129; C:GO:0005743; P:GO:0006123; C:GO:0016021; F:GO:0020037; P:GO:0022900; C:GO:0045277; F:GO:0046872; P:GO:1902600; P:GO:1902600	F:cytochrome-c oxidase activity; C:mitochondrial inner membrane; P:mitochondrial electron transport, cytochrome c to oxygen; C:integral component of membrane; F:heme binding; P:electron transport chain; C:respiratory chain complex IV; F:metal ion binding; P:proton transmembrane transport; P:proton transmembrane transport	K02256	COX1; cytochrome c oxidase subunit 1 [EC:7.1.1.9]	A 9100 Metabolism; B 09102 Energy metabolism; C 00190 Oxidative phosphorylation [PATH:ko00190]|A 9150 Organismal Systems; B 09153 Circulatory system; C 04260 Cardiac muscle contraction [PATH:ko04260]|A 9150 Organismal Systems; B 09159 Environmental adaptation; C 04714 Thermogenesis [PATH:ko04714]|A 9160 Human Diseases; B 09161 Cancer: overview; C 05208 Chemical carcinogenesis - reactive oxygen sp…	389.688	-0.649597	0.666047	-0.975303	0.32941	0.443982	389.688	-0.00793672	0.66667	-0.011905	0.990501	1	389.688	-0.909385	0.665845	-1.36576	0.172014	0.270603	114.21	542.47	92.12	350.4	491.16	617.92	94.98	352.02	520.67	658.24	432.86	676.47
Am_Rn_081979	.	.	.	.	.	16.7265	8.60495	2.99793	2.8703	0.0041008	0.00991609	16.7265	8.59607	2.99793	2.86734	0.0041394	0.00959644	16.7265	8.63703	2.99793	2.881	0.00396415	0.0110009	56.48	31.09	75.91	0	0	0	0	0	0	0	0	0
Am_Rn_034533	F:GO:0010277; C:GO:0016021; F:GO:0032441; F:GO:0051537	F:chlorophyllide a oxygenase [overall] activity; C:integral component of membrane; F:pheophorbide a oxygenase activity; F:2 iron, 2 sulfur cluster binding	.	.	.	566.623	-12.5635	1.24771	-10.0693	7.55131e-24	2.69769e-22	566.623	-11.2105	1.24801	-8.98272	2.64146e-19	8.39461e-18	566.623	-10.7844	1.24816	-8.64026	5.60837e-18	2.53146e-16	0	0	0	1447.82	1116	1803.58	274.91	574.09	902.82	398.72	307.24	590.21
Am_Rn_124020	C:GO:0000922; F:GO:0003735; F:GO:0005524; C:GO:0005737; C:GO:0005840; C:GO:0005874; P:GO:0006412; F:GO:0008017; F:GO:0016853; P:GO:0042254; C:GO:0045298; P:GO:0051013	C:spindle pole; F:structural constituent of ribosome; F:ATP binding; C:cytoplasm; C:ribosome; C:microtubule; P:translation; F:microtubule binding; F:isomerase activity; P:ribosome biogenesis; C:tubulin complex; P:microtubule severing	K02979	RP-S28e, RPS28; small subunit ribosomal protein S28e	A 9120 Genetic Information Processing; B 09122 Translation; C 03010 Ribosome [PATH:ko03010]|A 9160 Human Diseases; B 09172 Infectious disease: viral; C 05171 Coronavirus disease - COVID-19 [PATH:ko05171]	16.6882	8.60175	2.95953	2.90646	0.00365542	0.00893401	16.6882	8.59287	2.95953	2.90346	0.00369066	0.00866273	16.6882	8.63383	2.95953	2.9173	0.00353077	0.00995769	39	48	79	0	0	0	0	0	0	0	0	0
Am_Rn_003214	F:GO:0003980; C:GO:0005783; C:GO:0016021; P:GO:0018279; F:GO:0051082; P:GO:0071712; P:GO:0097359	F:UDP-glucose:glycoprotein glucosyltransferase activity; C:endoplasmic reticulum; C:integral component of membrane; P:protein N-linked glycosylation via asparagine; F:unfolded protein binding; P:ER-associated misfolded protein catabolic process; P:UDP-glucosylation	K11718	HUGT; UDP-glucose:glycoprotein glucosyltransferase [EC:2.4.1.-]	A 9120 Genetic Information Processing; B 09123 Folding, sorting and degradation; C 04141 Protein processing in endoplasmic reticulum [PATH:ko04141]	660.324	-0.616079	0.410707	-1.50004	0.133603	0.210357	660.324	-0.389435	0.410893	-0.947778	0.343242	0.448248	660.324	-0.516992	0.410753	-1.25864	0.208159	0.31603	342.47	643.01	282.43	522.89	980.88	983.3	363.83	827.7	974.14	533.78	823.37	1008.2
Am_Rn_003221	F:GO:0005488	F:binding	K17987	NBR1; next to BRCA1 gene 1 protein	A 9140 Cellular Processes; B 09141 Transport and catabolism; C 04137 Mitophagy - animal [PATH:ko04137]	281.166	1.31388	1.39611	0.941104	0.346652	0.462475	281.166	-0.740673	1.39477	-0.531035	0.595394	0.683842	281.166	1.52285	1.39633	1.09061	0.275445	0.395689	77.91	0.33	729.19	91.48	107.93	239.91	687.21	123.43	937.37	171.55	148.35	51.75
Am_Rn_056251	P:GO:0005986; P:GO:0006000; P:GO:0006002; P:GO:0006013; P:GO:0006094; P:GO:0006096; P:GO:0006098; P:GO:0009409; C:GO:0009570; P:GO:0009773; C:GO:0010319; P:GO:0015976; P:GO:0016311; P:GO:0030388; F:GO:0042132; C:GO:0048046	P:sucrose biosynthetic process; P:fructose metabolic process; P:fructose 6-phosphate metabolic process; P:mannose metabolic process; P:gluconeogenesis; P:glycolytic process; P:pentose-phosphate shunt; P:response to cold; C:chloroplast stroma; P:photosynthetic electron transport in photosystem I; C:stromule; P:carbon utilization; P:dephosphorylation; P:fructose 1,6-bisphosphate metabolic process; …	K03841	FBP, fbp; fructose-1,6-bisphosphatase I [EC:3.1.3.11]	A 9100 Metabolism; B 09101 Carbohydrate metabolism; C 00010 Glycolysis / Gluconeogenesis [PATH:ko00010]|A 9100 Metabolism; B 09101 Carbohydrate metabolism; C 00030 Pentose phosphate pathway [PATH:ko00030]|A 9100 Metabolism; B 09101 Carbohydrate metabolism; C 00051 Fructose and mannose metabolism [PATH:ko00051]|A 9100 Metabolism; B 09102 Energy metabolism; C 00710 Carbon fixation in photosynthetic…	1076.81	-13.827	1.22486	-11.2886	1.49373e-29	8.47066e-28	1076.81	-11.5846	1.22517	-9.45552	3.21414e-21	1.30747e-19	1076.81	-10.7757	1.22544	-8.79331	1.45217e-18	7.08998e-17	0	0	0	4258.96	2476.01	3635.41	551.39	705.55	962.36	483	274.93	526.54
Am_Rn_003225	.	.	.	.	.	313.596	-1.00859	1.96944	-0.512122	0.608565	0.71537	313.596	-0.759686	1.96952	-0.385721	0.699703	0.771986	313.596	-0.829017	1.96948	-0.420931	0.673805	0.781504	269.3	201.54	0	757.98	419.02	2.31	447.02	548.69	1.27	521.92	581.94	6.82
Am_Rn_090962	F:GO:0003735; C:GO:0005840; P:GO:0006412; P:GO:0042254	F:structural constituent of ribosome; C:ribosome; P:translation; P:ribosome biogenesis	K02917	RP-L35Ae, RPL35A; large subunit ribosomal protein L35Ae	A 9120 Genetic Information Processing; B 09122 Translation; C 03010 Ribosome [PATH:ko03010]|A 9160 Human Diseases; B 09172 Infectious disease: viral; C 05171 Coronavirus disease - COVID-19 [PATH:ko05171]	16.6569	8.59899	3.51875	2.44376	0.014535	0.0306228	16.6569	8.5901	3.51875	2.44124	0.014637	0.0293462	16.6569	8.63106	3.51875	2.45288	0.0141719	0.0330744	6	15	145	0	0	0	0	0	0	0	0	0
Am_Rn_041671	F:GO:0004318; C:GO:0005835; P:GO:0006633; P:GO:0006807; P:GO:0009610; F:GO:0016631; F:GO:0018580; P:GO:0042967; P:GO:0046686; F:GO:0051213	F:enoyl-[acyl-carrier-protein] reductase (NADH) activity; C:fatty acid synthase complex; P:fatty acid biosynthetic process; P:nitrogen compound metabolic process; P:response to symbiotic fungus; F:enoyl-[acyl-carrier-protein] reductase activity; F:nitronate monooxygenase activity; P:obsolete acyl-carrier-protein biosynthetic process; P:response to cadmium ion; F:dioxygenase activity	.	.	.	2197.62	5.99071	0.634114	9.44737	3.47451e-21	9.85166e-20	2197.62	3.32528	0.630618	5.27304	1.3418e-07	8.0632e-07	2197.62	8.62667	0.65476	13.1753	1.21708e-39	4.04488e-37	8588.06	4213.92	6199.07	96.61	55.44	264.02	399.37	648.31	1577.52	12.79	14.63	38.43
Am_Rn_085614	C:GO:0005840; P:GO:0042254	C:ribosome; P:ribosome biogenesis	K02941	RP-LP0, RPLP0; large subunit ribosomal protein LP0	A 9120 Genetic Information Processing; B 09122 Translation; C 03010 Ribosome [PATH:ko03010]|A 9160 Human Diseases; B 09172 Infectious disease: viral; C 05171 Coronavirus disease - COVID-19 [PATH:ko05171]	16.6546	8.59291	2.10211	4.08776	4.3556e-05	0.000160722	16.6546	7.62223	2.10211	3.62599	0.000287852	0.000882354	16.6546	8.62498	2.10211	4.10302	4.07797e-05	0.000193426	30	49	87	0	0	0	0	0	1	0	0	0
Am_Rn_113351	F:GO:0003735; C:GO:0005840; P:GO:0006412; C:GO:0016021; P:GO:0042254	F:structural constituent of ribosome; C:ribosome; P:translation; C:integral component of membrane; P:ribosome biogenesis	K02915	RP-L34e, RPL34; large subunit ribosomal protein L34e	A 9120 Genetic Information Processing; B 09122 Translation; C 03010 Ribosome [PATH:ko03010]|A 9160 Human Diseases; B 09172 Infectious disease: viral; C 05171 Coronavirus disease - COVID-19 [PATH:ko05171]	16.5394	8.58878	3.02994	2.83464	0.00458779	0.0109676	16.5394	8.5799	3.02994	2.8317	0.00463008	0.0105868	16.5394	8.62086	3.02994	2.84522	0.00443805	0.0121243	40	33	90	0	0	0	0	0	0	0	0	0
Am_Rn_121838	F:GO:0003735; C:GO:0005840; P:GO:0006412; P:GO:0042254	F:structural constituent of ribosome; C:ribosome; P:translation; P:ribosome biogenesis	K02953	RP-S13e, RPS13; small subunit ribosomal protein S13e	A 9120 Genetic Information Processing; B 09122 Translation; C 03010 Ribosome [PATH:ko03010]|A 9160 Human Diseases; B 09172 Infectious disease: viral; C 05171 Coronavirus disease - COVID-19 [PATH:ko05171]	16.5225	8.58737	3.01351	2.84962	0.00437714	0.0105168	16.5225	8.57848	3.01351	2.84667	0.00441789	0.0101648	16.5225	8.61944	3.01351	2.86026	0.00423289	0.0116343	31	46	88	0	0	0	0	0	0	0	0	0
Am_Rn_084538	.	.	.	.	.	16.4421	8.58027	3.74332	2.29215	0.0218969	0.0440609	16.4421	8.57138	3.74332	2.28978	0.0220342	0.0421019	16.4421	8.61234	3.74332	2.30072	0.0214075	0.0471299	1	32	133	0	0	0	0	0	0	0	0	0
Am_Rn_003259	C:GO:0016021	C:integral component of membrane	.	.	.	85.8772	-3.11702	1.8615	-1.67447	0.094038	0.156119	85.8772	-0.117614	1.86694	-0.0629983	0.949768	0.971159	85.8772	-1.2639	1.86344	-0.67826	0.497607	0.624438	6.76	0	57.19	249.45	38.22	472.7	12.25	1.09	83.76	70.21	0	138.9
Am_Rn_066248	F:GO:0016798	F:hydrolase activity, acting on glycosyl bonds	.	.	.	42.2706	6.59998	2.59878	2.53965	0.0110964	0.0240902	42.2706	8.56708	2.76546	3.09789	0.00194907	0.00490304	42.2706	1.68647	2.50524	0.673178	0.500834	0.627279	163.27	151.14	0	4.24	0	0	1.12	0	0	95.54	31.75	0
Am_Rn_003269	F:GO:0003677; F:GO:0004386; F:GO:0046872	F:DNA binding; F:helicase activity; F:metal ion binding	.	.	.	684.327	-0.32786	0.352417	-0.930318	0.352206	0.4686	684.327	0.267481	0.352993	0.75775	0.448601	0.555611	684.327	-0.0242217	0.352641	-0.0686865	0.945239	0.986773	690.3	548.67	395.86	959.65	833.94	884.78	289.25	760.47	780.78	613.95	792.54	824.8
Am_Rn_003282	F:GO:0003700; F:GO:0003712; C:GO:0005634; C:GO:0005667; P:GO:0006355; P:GO:0006355; P:GO:0009723; P:GO:0009737; P:GO:0009863; P:GO:0009867; P:GO:0009938; P:GO:0010187; P:GO:0042538; F:GO:0043565; P:GO:2000033; P:GO:2000377	F:DNA-binding transcription factor activity; F:transcription coregulator activity; C:nucleus; C:transcription regulator complex; P:regulation of DNA-templated transcription; P:regulation of DNA-templated transcription; P:response to ethylene; P:response to abscisic acid; P:salicylic acid mediated signaling pathway; P:jasmonic acid mediated signaling pathway; P:negative regulation of gibberellic a…	K14494	DELLA; DELLA protein	A 9130 Environmental Information Processing; B 09132 Signal transduction; C 04075 Plant hormone signal transduction [PATH:ko04075]	960.869	0.360756	0.637975	0.565471	0.571754	0.682111	960.869	-0.523651	0.63764	-0.821233	0.411514	0.519335	960.869	-0.168546	0.637735	-0.264288	0.791558	0.876305	610.42	823.25	777.4	1014.61	917.97	187.61	1222.11	1847.44	970.82	1403.42	1375.02	459.14
Am_Rn_106105	F:GO:0003735; C:GO:0005840; P:GO:0006412; P:GO:0042254	F:structural constituent of ribosome; C:ribosome; P:translation; P:ribosome biogenesis	K02966	RP-S19e, RPS19; small subunit ribosomal protein S19e	A 9120 Genetic Information Processing; B 09122 Translation; C 03010 Ribosome [PATH:ko03010]|A 9160 Human Diseases; B 09172 Infectious disease: viral; C 05171 Coronavirus disease - COVID-19 [PATH:ko05171]	16.3244	8.56991	2.97725	2.87846	0.00399622	0.00969379	16.3244	8.56102	2.97725	2.87548	0.00403419	0.00938318	16.3244	8.60198	2.97725	2.88923	0.00386182	0.0107669	46	41	74	0	0	0	0	0	0	0	0	0
Am_Rn_107279	.	.	.	.	.	31.8253	9.52947	3.5795	2.66224	0.00776235	0.0175009	31.8253	9.52058	3.5795	2.65975	0.00781979	0.0168627	31.8253	8.59975	3.5795	2.4025	0.0162833	0.0372951	154	160	0	0	0	0	0	0	0	0	1	0
Am_Rn_087223	C:GO:0005750; P:GO:0006122	C:mitochondrial respiratory chain complex III; P:mitochondrial electron transport, ubiquinol to cytochrome c	K00419	QCR9, UCRC; ubiquinol-cytochrome c reductase subunit 9	A 9100 Metabolism; B 09102 Energy metabolism; C 00190 Oxidative phosphorylation [PATH:ko00190]|A 9150 Organismal Systems; B 09153 Circulatory system; C 04260 Cardiac muscle contraction [PATH:ko04260]|A 9150 Organismal Systems; B 09159 Environmental adaptation; C 04714 Thermogenesis [PATH:ko04714]|A 9160 Human Diseases; B 09161 Cancer: overview; C 05208 Chemical carcinogenesis - reactive oxygen sp…	1005.88	0.283574	0.291939	0.971345	0.331376	0.446159	1005.88	-0.676405	0.291259	-2.32235	0.0202141	0.0390466	1005.88	0.37654	0.291996	1.28954	0.197211	0.302277	574.46	869.05	959.91	791.04	753.87	1005.78	2096.47	1253.17	1416.59	847.05	752.89	828.92
Am_Rn_111416	F:GO:0003723; F:GO:0003735; P:GO:0006412; C:GO:0022625; P:GO:0042254	F:RNA binding; F:structural constituent of ribosome; P:translation; C:cytosolic large ribosomal subunit; P:ribosome biogenesis	K02885	RP-L19e, RPL19; large subunit ribosomal protein L19e	A 9120 Genetic Information Processing; B 09122 Translation; C 03010 Ribosome [PATH:ko03010]|A 9160 Human Diseases; B 09172 Infectious disease: viral; C 05171 Coronavirus disease - COVID-19 [PATH:ko05171]	16.3363	8.56489	2.17389	3.93989	8.15191e-05	0.000284204	16.3363	7.59421	2.17389	3.49337	0.000476961	0.0013901	16.3363	8.59696	2.17389	3.95464	7.66488e-05	0.000339536	29	39	94	0	0	0	0	0	1	0	0	0
Am_Rn_003312	F:GO:0003743; C:GO:0005840; P:GO:0006446; C:GO:0016021	F:translation initiation factor activity; C:ribosome; P:regulation of translational initiation; C:integral component of membrane	.	.	.	758.044	0.506662	0.245704	2.06208	0.0391998	0.0734656	758.044	0.455485	0.24565	1.8542	0.0637103	0.10674	758.044	0.290834	0.245381	1.18523	0.235925	0.349739	806.95	766.45	728.66	718.35	689.73	693.06	512.73	885.81	806.15	578.99	958.35	974.29
Am_Rn_059503	F:GO:0004108; P:GO:0006099; P:GO:0006101; P:GO:0046487	F:citrate (Si)-synthase activity; P:tricarboxylic acid cycle; P:citrate metabolic process; P:glyoxylate metabolic process	K01647	CS, gltA; citrate synthase [EC:2.3.3.1]	A 9100 Metabolism; B 09101 Carbohydrate metabolism; C 00020 Citrate cycle (TCA cycle) [PATH:ko00020]|A 9100 Metabolism; B 09101 Carbohydrate metabolism; C 00630 Glyoxylate and dicarboxylate metabolism [PATH:ko00630]	31.6264	8.55561	2.33223	3.66842	0.000244052	0.000774715	31.6264	9.50852	2.33223	4.077	4.56197e-05	0.000166704	31.6264	8.58769	2.33223	3.68217	0.000231253	0.00090326	7	16	290	0	0	1	0	0	0	1	0	0
Am_Rn_025219	.	.	.	.	.	416.424	-0.395359	0.222851	-1.7741	0.0760466	0.130022	416.424	-0.676815	0.222252	-3.04526	0.00232479	0.0057338	416.424	-0.443919	0.222651	-1.99379	0.0461751	0.0902913	200.31	377.58	219.28	428.96	421.63	485.98	456.94	646.21	513.64	424.72	517.7	467.61
Am_Rn_103049	.	.	.	.	.	59.1076	10.4211	1.58226	6.58621	4.51198e-11	4.16383e-10	59.1076	9.45041	1.58226	5.97273	2.33314e-09	1.914e-08	59.1076	8.58721	1.46651	5.85556	4.75407e-09	5.23359e-08	176	373	52	0	0	0	0	0	1	1	1	0
Am_Rn_104053	P:GO:0045454; F:GO:0051920; P:GO:0098869	P:cell redox homeostasis; F:peroxiredoxin activity; P:cellular oxidant detoxification	K03386	PRDX2_4, ahpC; peroxiredoxin 2/4 [EC:1.11.1.24]	A 9140 Cellular Processes; B 09143 Cell growth and death; C 04214 Apoptosis - fly [PATH:ko04214]	16.1512	8.55452	3.26574	2.61947	0.00880668	0.0195962	16.1512	8.54563	3.26574	2.61675	0.00887718	0.0188577	16.1512	8.58659	3.26574	2.62929	0.00855633	0.0214065	20	20	120	0	0	0	0	0	0	0	0	0
Am_Rn_003346	C:GO:0005739; C:GO:0016021; P:GO:0045454	C:mitochondrion; C:integral component of membrane; P:cell redox homeostasis	K24917	AAP; amino acid permease	None	197.086	-0.44242	0.225527	-1.96172	0.0497954	0.0901875	197.086	-0.421662	0.225671	-1.86848	0.0616947	0.103831	197.086	-0.0536536	0.227289	-0.236059	0.813387	0.892285	147.73	116.66	143.51	255.1	218.73	250.67	237.27	246.31	224.14	168.52	200.95	197.36
Am_Rn_102635	.	.	.	.	.	16.0248	8.54318	3.05173	2.79945	0.00511892	0.0120905	16.0248	8.5343	3.05173	2.79654	0.00516527	0.0116498	16.0248	8.57525	3.05173	2.80996	0.00495471	0.0133441	39	33	86	0	0	0	0	0	0	0	0	0
Am_Rn_003361	P:GO:0009086; P:GO:0016310; F:GO:0046522	P:methionine biosynthetic process; P:phosphorylation; F:S-methyl-5-thioribose kinase activity	K00899	mtnK; 5-methylthioribose kinase [EC:2.7.1.100]	A 9100 Metabolism; B 09105 Amino acid metabolism; C 00270 Cysteine and methionine metabolism [PATH:ko00270]	261.876	-1.0957	0.495985	-2.20915	0.0271642	0.0533406	261.876	-0.790173	0.496491	-1.59152	0.111493	0.173469	261.876	-1.10841	0.495916	-2.23507	0.0254126	0.0547057	85.8	127.87	159.41	235.78	413.92	377.58	96.2	486.02	270.56	300.13	433.64	321.24
Am_Rn_047079	F:GO:0000287; F:GO:0004775; F:GO:0004776; F:GO:0005524; C:GO:0005739; P:GO:0006104; P:GO:0019643; C:GO:0042709	F:magnesium ion binding; F:succinate-CoA ligase (ADP-forming) activity; F:succinate-CoA ligase (GDP-forming) activity; F:ATP binding; C:mitochondrion; P:succinyl-CoA metabolic process; P:reductive tricarboxylic acid cycle; C:succinate-CoA ligase complex	K01900	LSC2; succinyl-CoA synthetase beta subunit [EC:6.2.1.4 6.2.1.5]	A 9100 Metabolism; B 09101 Carbohydrate metabolism; C 00020 Citrate cycle (TCA cycle) [PATH:ko00020]|A 9100 Metabolism; B 09101 Carbohydrate metabolism; C 00640 Propanoate metabolism [PATH:ko00640]	1482.2	-0.175626	0.214887	-0.817295	0.41376	0.53196	1482.2	-0.677104	0.214582	-3.15546	0.00160248	0.00411359	1482.2	0.0504592	0.215036	0.234655	0.814477	0.893138	692.57	1299.81	1189.29	1175.63	1555.56	1897.38	1739.38	2245.57	2531.05	1181.34	1272.18	1562.85
Am_Rn_069483	F:GO:0003735; C:GO:0005840; P:GO:0006412; P:GO:0042254	F:structural constituent of ribosome; C:ribosome; P:translation; P:ribosome biogenesis	K02925	RP-L3e, RPL3; large subunit ribosomal protein L3e	A 9120 Genetic Information Processing; B 09122 Translation; C 03010 Ribosome [PATH:ko03010]|A 9160 Human Diseases; B 09172 Infectious disease: viral; C 05171 Coronavirus disease - COVID-19 [PATH:ko05171]	31.3847	9.50209	2.17889	4.36098	1.29482e-05	5.23367e-05	31.3847	7.61695	2.09492	3.63591	0.000276999	0.000852856	31.3847	8.57237	2.17889	3.93428	8.3445e-05	0.000366373	5	17	288	0	0	0	1	0	1	1	0	0
Am_Rn_054215	P:GO:0000050; P:GO:0000053; F:GO:0004055; F:GO:0005524; C:GO:0005737; P:GO:0006522; P:GO:0006526; P:GO:0006531; P:GO:0006560	P:urea cycle; P:argininosuccinate metabolic process; F:argininosuccinate synthase activity; F:ATP binding; C:cytoplasm; P:alanine metabolic process; P:arginine biosynthetic process; P:aspartate metabolic process; P:proline metabolic process	K01940	argG, ASS1; argininosuccinate synthase [EC:6.3.4.5]	A 9100 Metabolism; B 09105 Amino acid metabolism; C 00250 Alanine, aspartate and glutamate metabolism [PATH:ko00250]|A 9100 Metabolism; B 09105 Amino acid metabolism; C 00220 Arginine biosynthesis [PATH:ko00220]|A 9160 Human Diseases; B 09166 Cardiovascular disease; C 05418 Fluid shear stress and atherosclerosis [PATH:ko05418]	541.344	-0.0138645	0.271993	-0.0509738	0.959346	1	541.344	-0.677432	0.271028	-2.49949	0.0124373	0.0254238	541.344	-0.311555	0.271445	-1.14776	0.251066	0.367589	412.29	407.12	284	365.15	511.45	583.57	788.59	682.24	792.15	532	496.11	800.29
Am_Rn_094192	F:GO:0003735; C:GO:0005840; P:GO:0006412; P:GO:0042254	F:structural constituent of ribosome; C:ribosome; P:translation; P:ribosome biogenesis	K02883	RP-L18e, RPL18; large subunit ribosomal protein L18e	A 9120 Genetic Information Processing; B 09122 Translation; C 03010 Ribosome [PATH:ko03010]|A 9160 Human Diseases; B 09172 Infectious disease: viral; C 05171 Coronavirus disease - COVID-19 [PATH:ko05171]	15.9874	8.53978	3.68029	2.32041	0.0203187	0.041206	15.9874	8.53089	3.68029	2.318	0.0204495	0.0394596	15.9874	8.57185	3.68029	2.32913	0.0198524	0.0441711	4	9	146	0	0	0	0	0	0	0	0	0
Am_Rn_003402	.	.	.	.	.	251.05	2.91605	1.76936	1.64808	0.0993369	0.163634	251.05	1.97601	1.76813	1.11757	0.26375	0.359471	251.05	1.01476	1.76744	0.574139	0.565874	0.686861	0	155.11	1182.61	53.94	0	190.43	177.83	101.24	145.25	506.69	278.86	70.43
Am_Rn_091448	F:GO:0005515; C:GO:0009522; C:GO:0009523; C:GO:0009535; P:GO:0009765; C:GO:0016021; F:GO:0016168; P:GO:0018298; F:GO:0046872	F:protein binding; C:photosystem I; C:photosystem II; C:chloroplast thylakoid membrane; P:photosynthesis, light harvesting; C:integral component of membrane; F:chlorophyll binding; P:obsolete protein-chromophore linkage; F:metal ion binding	K08912	LHCB1; light-harvesting complex II chlorophyll a/b binding protein 1	A 9100 Metabolism; B 09102 Energy metabolism; C 00196 Photosynthesis - antenna proteins [PATH:ko00196]	13753.5	-11.333	0.654196	-17.3236	3.12325e-67	1.48886e-64	13753.5	-10.721	0.654207	-16.3878	2.33912e-60	1.92876e-57	13753.5	-10.7706	0.654205	-16.4637	6.69119e-61	7.00042e-58	0	20.93	2.73	16738.8	27740.1	32245.2	10012.5	17836.1	22834.3	17842.5	16334.2	18314.2
Am_Rn_003411	C:GO:0005802; P:GO:0032012	C:trans-Golgi network; P:regulation of ARF protein signal transduction	K18442	ARFGEF, BIG; brefeldin A-inhibited guanine nucleotide-exchange protein	A 9140 Cellular Processes; B 09141 Transport and catabolism; C 04144 Endocytosis [PATH:ko04144]	559.236	0.0107711	0.27761	0.0387995	0.96905	1	559.236	-0.0642308	0.277512	-0.231452	0.816964	0.869048	559.236	-0.378275	0.277026	-1.36549	0.1721	0.27067	338	611.86	350.86	406.74	603.31	645.65	430.27	642.21	674.04	546.45	714.04	951.87
Am_Rn_036183	.	.	K22382	WDR26; WD repeat-containing protein 26	None	1363.79	0.15203	0.256002	0.593864	0.552603	0.665038	1363.79	-0.678616	0.255512	-2.65591	0.00790953	0.0170238	1363.79	0.196423	0.256008	0.767255	0.44293	0.572092	711.76	1443.82	999.39	1137.15	1050.08	1445.77	1279.45	2687.36	2566.13	1131.82	1167.95	1278.58
Am_Rn_034883	F:GO:0004177; P:GO:0006508; F:GO:0008237; F:GO:0008270	F:aminopeptidase activity; P:proteolysis; F:metallopeptidase activity; F:zinc ion binding	K01267	DNPEP; aspartyl aminopeptidase [EC:3.4.11.21]	None	246.638	-1.15798	0.250875	-4.61574	3.91695e-06	1.72791e-05	246.638	-0.680007	0.252336	-2.69484	0.00704214	0.0153463	246.638	-0.417156	0.253151	-1.64786	0.0993819	0.172144	125.22	138.02	133.57	379.72	325.7	447.21	168.96	299.04	371.18	219.56	192.31	292.36
Am_Rn_102766	F:GO:0003735; C:GO:0005840; P:GO:0006412; P:GO:0042254	F:structural constituent of ribosome; C:ribosome; P:translation; P:ribosome biogenesis	K02901	RP-L27e, RPL27; large subunit ribosomal protein L27e	A 9120 Genetic Information Processing; B 09122 Translation; C 03010 Ribosome [PATH:ko03010]|A 9160 Human Diseases; B 09172 Infectious disease: viral; C 05171 Coronavirus disease - COVID-19 [PATH:ko05171]	15.857	8.52796	3.70117	2.30412	0.0212157	0.0428088	15.857	8.51908	3.70117	2.30172	0.0213508	0.0409809	15.857	8.56004	3.70117	2.31279	0.0207342	0.0458545	3	11	144	0	0	0	0	0	0	0	0	0
Am_Rn_064289	C:GO:0009535; C:GO:0016021	C:chloroplast thylakoid membrane; C:integral component of membrane	K03542	psbS; photosystem II 22kDa protein	A 9100 Metabolism; B 09102 Energy metabolism; C 00195 Photosynthesis [PATH:ko00195]	4442.4	-14.8976	1.21878	-12.2234	2.33049e-34	1.80003e-32	4442.4	-13.0932	1.21883	-10.7425	6.4276e-27	4.77128e-25	4442.4	-10.7616	1.2191	-8.82746	1.07076e-18	5.33452e-17	0	1	0	15767.8	10276.3	16676.1	2980.67	4128.19	5195.5	791.69	550.38	1143.23
Am_Rn_118191	F:GO:0003735; C:GO:0005840; P:GO:0006412; C:GO:0016021; P:GO:0042254	F:structural constituent of ribosome; C:ribosome; P:translation; C:integral component of membrane; P:ribosome biogenesis	K02949	RP-S11e, RPS11; small subunit ribosomal protein S11e	A 9120 Genetic Information Processing; B 09122 Translation; C 03010 Ribosome [PATH:ko03010]|A 9160 Human Diseases; B 09172 Infectious disease: viral; C 05171 Coronavirus disease - COVID-19 [PATH:ko05171]	15.784	8.52135	3.04819	2.79554	0.00518124	0.0122207	15.784	8.51246	3.04819	2.79263	0.00522816	0.0117795	15.784	8.55342	3.04819	2.80607	0.00501503	0.013482	38	36	82	0	0	0	0	0	0	0	0	0
Am_Rn_053663	F:GO:0001228; C:GO:0005634; P:GO:0045944; F:GO:0046983	F:DNA-binding transcription activator activity, RNA polymerase II-specific; C:nucleus; P:positive regulation of transcription by RNA polymerase II; F:protein dimerization activity	.	.	.	48.1511	5.76582	1.08181	5.32977	9.83358e-08	5.60562e-07	48.1511	8.51079	1.50685	5.64807	1.62258e-08	1.143e-07	48.1511	0.873732	0.944712	0.924865	0.355036	0.483234	178.5	29	81.79	4	3	0	1	0	0	50.87	56.64	114.4
Am_Rn_053627	F:GO:0016301; P:GO:0016310	F:kinase activity; P:phosphorylation	.	.	.	188.913	-0.217709	0.194196	-1.12108	0.262255	0.368591	188.913	-0.684422	0.191635	-3.57148	0.000354968	0.00106719	188.913	-0.228954	0.193902	-1.18078	0.237692	0.352037	111.48	159.31	111.86	168.71	190.86	212.85	256.68	229.57	296.62	188.43	214.46	186.41
Am_Rn_141613	.	.	.	.	.	15.6527	8.50939	3.693	2.30419	0.0212119	0.042804	15.6527	8.5005	3.693	2.30179	0.0213473	0.0409793	15.6527	8.54146	3.693	2.31288	0.0207294	0.0458508	1	82.9	78.86	0	0	0	0	0	0	0	0	0
Am_Rn_103991	.	.	.	.	.	15.4887	8.49409	3.58396	2.37003	0.0177867	0.0366263	15.4887	8.4852	3.58396	2.36755	0.0179063	0.0350577	15.4887	8.52616	3.58396	2.37898	0.0173607	0.0393752	4	19	132	0	0	0	0	0	0	0	0	0
Am_Rn_003447	.	.	.	.	.	305.261	0.173338	0.351734	0.49281	0.622147	0.726604	305.261	0.602532	0.352763	1.70804	0.0876295	0.141011	305.261	0.2652	0.351848	0.753735	0.451008	0.580383	189.91	408.3	316.61	305.65	353.49	373.26	151.41	290.83	339.46	245.25	466.75	273.8
Am_Rn_102338	.	.	.	.	.	16.8112	4.50053	2.07643	2.16743	0.0302019	0.0583848	16.8112	4.36451	2.07168	2.10675	0.0351392	0.0634244	16.8112	8.51718	2.33672	3.64493	0.000267464	0.00102553	0	24.73	129.65	2.71	1.4	4.56	2.13	0	8.35	0	0	0
Am_Rn_100425	F:GO:0003735; C:GO:0005840; P:GO:0006412; P:GO:0042254	F:structural constituent of ribosome; C:ribosome; P:translation; P:ribosome biogenesis	K02974	RP-S24e, RPS24; small subunit ribosomal protein S24e	A 9120 Genetic Information Processing; B 09122 Translation; C 03010 Ribosome [PATH:ko03010]|A 9160 Human Diseases; B 09172 Infectious disease: viral; C 05171 Coronavirus disease - COVID-19 [PATH:ko05171]	15.525	8.49743	3.75466	2.26317	0.0236255	0.0471135	15.525	8.48854	3.75466	2.2608	0.0237717	0.0450382	15.525	8.5295	3.75466	2.27171	0.0231041	0.050287	2	13	140	0	0	0	0	0	0	0	0	0
Am_Rn_086474	.	.	.	.	.	97.4456	-1.53595	2.68375	-0.572315	0.567108	0.677789	97.4456	-4.35107	2.51818	-1.72786	0.0840126	0.135903	97.4456	-10.7551	2.4897	-4.31985	1.56138e-05	8.1677e-05	0	0	0	0	2	0	0	15	0	77	1068.29	105.13
Am_Rn_086863	F:GO:0019904	F:protein domain specific binding	K06630	YWHAE; 14-3-3 protein epsilon	A 9130 Environmental Information Processing; B 09132 Signal transduction; C 04011 MAPK signaling pathway - yeast [PATH:ko04011]|A 9130 Environmental Information Processing; B 09132 Signal transduction; C 04390 Hippo signaling pathway [PATH:ko04390]|A 9130 Environmental Information Processing; B 09132 Signal transduction; C 04391 Hippo signaling pathway - fly [PATH:ko04391]|A 9130 Environmental In…	15.446	8.48367	2.22538	3.81223	0.000137719	0.000459399	15.446	7.51299	2.22538	3.37604	0.000735362	0.00205081	15.446	8.51574	2.22538	3.82664	0.000129903	0.000543239	27	34.99	91	0	0	0	0	0	1	0	0	0
Am_Rn_003489	.	.	K14772	UTP20; U3 small nucleolar RNA-associated protein 20	None	539.464	-0.509414	0.370558	-1.37472	0.169218	0.25636	539.464	0.157335	0.371248	0.4238	0.671711	0.748475	539.464	0.500476	0.371665	1.34658	0.178115	0.278382	618.39	368.75	313.26	763.56	823.63	862.33	262.86	655.5	664.08	365.85	438.11	440.94
Am_Rn_003490	C:GO:0016020	C:membrane	.	.	.	195.134	-0.861783	2.53779	-0.339579	0.734173	0.824853	195.134	0.310174	2.53835	0.122195	0.902744	0.937022	195.134	-0.232504	2.53801	-0.0916086	0.927009	0.973291	80.03	0	315.29	416.56	0	566.11	122.98	0	308.45	329.86	0	301.22
Am_Rn_050018	F:GO:0003962; P:GO:0006555; P:GO:0019346; F:GO:0030170	F:cystathionine gamma-synthase activity; P:methionine metabolic process; P:transsulfuration; F:pyridoxal phosphate binding	K01739	metB; cystathionine gamma-synthase [EC:2.5.1.48]	A 9100 Metabolism; B 09102 Energy metabolism; C 00920 Sulfur metabolism [PATH:ko00920]|A 9100 Metabolism; B 09105 Amino acid metabolism; C 00270 Cysteine and methionine metabolism [PATH:ko00270]|A 9100 Metabolism; B 09106 Metabolism of other amino acids; C 00450 Selenocompound metabolism [PATH:ko00450]	1673.68	-6.31588	0.905264	-6.97684	3.01902e-12	3.24894e-11	1673.68	-7.22696	0.904656	-7.98863	1.36444e-15	2.80511e-14	1673.68	-10.7465	0.904011	-11.8875	1.37395e-32	2.66547e-30	0	8.88	0	506.61	194.56	149.68	414.32	916.48	314.23	5408.71	6225.33	7814.2
Am_Rn_039973	C:GO:0009534; P:GO:0010027; P:GO:0010207; P:GO:0045037; P:GO:0045038	C:chloroplast thylakoid; P:thylakoid membrane organization; P:photosystem II assembly; P:protein import into chloroplast stroma; P:protein import into chloroplast thylakoid membrane	.	.	.	1395.89	-1.89372	0.26961	-7.02393	2.15709e-12	2.36644e-11	1395.89	-0.685059	0.270193	-2.53544	0.0112305	0.0232385	1395.89	-0.294171	0.270466	-1.08764	0.276752	0.397119	822.88	546.54	430.68	2922.85	2650.45	3277.35	1089.61	1321.62	1404.57	884.63	943.59	1155.93
Am_Rn_050063	P:GO:0006952	P:defense response	.	.	.	501.672	11.5789	1.93928	5.97073	2.36191e-09	1.70798e-08	501.672	5.62174	1.66306	3.38036	0.000723906	0.00202138	501.672	8.48068	1.69257	5.01054	5.42774e-07	3.98797e-06	3839.42	0	623.19	0	1.66	0	31.9	45.67	51.17	1.53	10.91	4.94
Am_Rn_003514	F:GO:0003676; C:GO:0005634; C:GO:0005694; P:GO:0006554; F:GO:0008270; F:GO:0018024; P:GO:0034968	F:nucleic acid binding; C:nucleus; C:chromosome; P:lysine catabolic process; F:zinc ion binding; F:histone-lysine N-methyltransferase activity; P:histone lysine methylation	.	.	.	341.739	0.111162	0.258552	0.429939	0.66724	0.766658	341.739	0.262393	0.258968	1.01323	0.310953	0.413065	341.739	0.413153	0.259257	1.5936	0.111025	0.188893	258.68	310.18	399.09	340.42	367.21	459.43	304.81	308.23	430.94	216.75	372.6	372.7
Am_Rn_091294	.	.	.	.	.	82.1777	9.92679	1.4806	6.70459	2.01973e-11	1.94385e-10	82.1777	7.64976	1.09845	6.96417	3.30349e-12	4.27966e-11	82.1777	8.47808	1.22408	6.92607	4.32684e-12	8.19861e-11	435	280	74	1	0	0	3	2	0	1	1	1
Am_Rn_057454	C:GO:0016021; F:GO:0016788; C:GO:0048046	C:integral component of membrane; F:hydrolase activity, acting on ester bonds; C:apoplast	.	.	.	3054.55	-13.5218	1.24127	-10.8935	1.23756e-27	5.98364e-26	3054.55	-15.3399	1.2412	-12.3589	4.35844e-35	6.51822e-33	3054.55	-10.7065	1.24186	-8.62137	6.61587e-18	2.9409e-16	0	0	0	1897.82	3331.23	3229.34	7418.87	12322.6	10033.4	527.86	459.53	224.48
Am_Rn_086746	C:GO:0005886	C:plasma membrane	.	.	.	385.993	0.574997	0.26421	2.17629	0.0295337	0.0573002	385.993	-0.686337	0.261236	-2.62727	0.0086074	0.0183587	385.993	-0.0317088	0.262369	-0.120856	0.903805	0.957543	245.06	383.62	271.28	217.2	225.04	341.89	728.53	517.47	562.04	423.15	403.78	376.47
Am_Rn_076337	P:GO:0006979; P:GO:0030091; F:GO:0033743; F:GO:0046872	P:response to oxidative stress; P:protein repair; F:peptide-methionine (R)-S-oxide reductase activity; F:metal ion binding	K07305	msrB; peptide-methionine (R)-S-oxide reductase [EC:1.8.4.12]	None	480.658	-0.332535	0.209828	-1.5848	0.113011	0.182455	480.658	-0.686527	0.20914	-3.28261	0.0010285	0.0027663	480.658	-0.278728	0.209868	-1.32811	0.184143	0.285881	286.12	279.28	370.4	539.78	415.66	579.14	661.66	637.64	628.8	537.77	492.67	473.77
Am_Rn_003524	F:GO:0005524	F:ATP binding	K10779	ATRX; transcriptional regulator ATRX	None	1077.04	0.300284	0.189624	1.58358	0.11329	0.182838	1077.04	0.161689	0.189477	0.853345	0.393468	0.501715	1077.04	0.208089	0.189475	1.09824	0.272099	0.391766	691.1	1073.75	1255.44	1025.58	875.63	1267.56	987.09	1194.13	1281.79	1154.26	1080.37	1196.57
Am_Rn_097921	.	.	.	.	.	188.424	12.0937	1.41505	8.54649	1.26886e-17	2.53515e-16	188.424	10.2663	1.29648	7.91862	2.40162e-15	4.74553e-14	188.424	8.47516	0.956623	8.85946	8.04051e-19	4.07506e-17	877	571	377	0	0	0	0	0	2	0	2	5
Am_Rn_003532	F:GO:0003677; C:GO:0005634; F:GO:0042393; P:GO:2000779	F:DNA binding; C:nucleus; F:histone binding; P:regulation of double-strand break repair	K17046	DEK; protein DEK	None	212.467	-0.946131	0.434902	-2.17551	0.0295922	0.0573917	212.467	-0.0834482	0.436986	-0.190963	0.848555	0.894559	212.467	-0.58992	0.435524	-1.35451	0.175575	0.275218	178.74	77.46	117.41	323.63	285.83	348.55	133.8	148.67	249.93	347.59	249.45	163.03
Am_Rn_042353	P:GO:0000054; P:GO:0002181; F:GO:0005516; F:GO:0005524; C:GO:0005829; C:GO:0005844; P:GO:0006364; P:GO:0006415; P:GO:0006450; P:GO:0006452; F:GO:0016887; P:GO:0042149; F:GO:0051082; P:GO:0051083	P:ribosomal subunit export from nucleus; P:cytoplasmic translation; F:calmodulin binding; F:ATP binding; C:cytosol; C:polysome; P:rRNA processing; P:translational termination; P:regulation of translational fidelity; P:translational frameshifting; F:ATP hydrolysis activity; P:cellular response to glucose starvation; F:unfolded protein binding; P:'de novo' cotranslational protein folding	K03283	HSPA1s; heat shock 70kDa protein 1/2/6/8	A 9120 Genetic Information Processing; B 09121 Transcription; C 03040 Spliceosome [PATH:ko03040]|A 9120 Genetic Information Processing; B 09123 Folding, sorting and degradation; C 04141 Protein processing in endoplasmic reticulum [PATH:ko04141]|A 9130 Environmental Information Processing; B 09132 Signal transduction; C 04010 MAPK signaling pathway [PATH:ko04010]|A 9140 Cellular Processes; B 09141…	53.7151	10.2843	2.10643	4.88233	1.04837e-06	5.10123e-06	53.7151	10.2754	2.10643	4.87812	1.07104e-06	5.39301e-06	53.7151	8.46452	2.02347	4.18316	2.87479e-05	0.000141109	14	55	466	0	0	0	0	0	0	1	0	1
Am_Rn_018213	.	.	.	.	.	53.6285	10.2816	2.05131	5.01223	5.38034e-07	2.74267e-06	53.6285	10.2727	2.05131	5.0079	5.50282e-07	2.92025e-06	53.6285	8.44438	1.96282	4.30216	1.69141e-05	8.76248e-05	346	102.42	56.22	0	0	0	0	0	0	0	2.24	0
Am_Rn_035837	F:GO:0003700; C:GO:0005667; P:GO:0006352; P:GO:0006355; P:GO:0006355	F:DNA-binding transcription factor activity; C:transcription regulator complex; P:DNA-templated transcription initiation; P:regulation of DNA-templated transcription; P:regulation of DNA-templated transcription	K03086	rpoD; RNA polymerase primary sigma factor	A 9140 Cellular Processes; B 09142 Cell motility; C 02040 Flagellar assembly [PATH:ko02040]	766.694	-13.1582	1.19102	-11.0478	2.24702e-28	1.15606e-26	766.694	-11.5491	1.1913	-9.69455	3.1805e-22	1.44396e-20	766.694	-10.6832	1.19162	-8.96526	3.0954e-19	1.65771e-17	0	0	0	2387.14	1833.59	2310.12	557.08	758.05	839.46	433.75	392.59	373.46
Am_Rn_003543	.	.	.	.	.	565.738	0.603613	0.404535	1.49211	0.135669	0.213039	565.738	-0.142698	0.403798	-0.35339	0.723796	0.793044	565.738	0.601973	0.404487	1.48824	0.136688	0.224121	246.47	460.47	952	406.34	465.87	532.94	624.15	914.79	811	454.79	522.82	451.87
Am_Rn_046457	F:GO:0003680; C:GO:0016021	F:minor groove of adenine-thymine-rich DNA binding; C:integral component of membrane	.	.	.	265.591	9.40863	0.800439	11.7543	6.70862e-32	4.48845e-30	265.591	7.88363	0.607778	12.9712	1.78115e-38	3.64706e-36	265.591	8.42843	0.656207	12.8442	9.27472e-38	2.80097e-35	709	787	1116	1	2	2	8	1	5	4	5	1
Am_Rn_003552	.	.	K24816	MROH1, HEATR7A; maestro heat-like repeat-containing protein family member 1	None	342.787	-0.0896625	0.659305	-0.135995	0.891825	0.950481	342.787	0.649669	0.660198	0.984052	0.32509	0.428764	342.787	-0.220148	0.659163	-0.333982	0.738393	0.834993	366.65	409.17	104.37	321.12	375.82	531.51	61.38	371.83	325.49	220.09	531.61	612.82
Am_Rn_068252	P:GO:0003400; F:GO:0003924; F:GO:0005525; C:GO:0005794; P:GO:0006886; P:GO:0006888; P:GO:0016050; C:GO:0030127; P:GO:0061024; P:GO:0070863; C:GO:0070971	P:regulation of COPII vesicle coating; F:GTPase activity; F:GTP binding; C:Golgi apparatus; P:intracellular protein transport; P:endoplasmic reticulum to Golgi vesicle-mediated transport; P:vesicle organization; C:COPII vesicle coat; P:membrane organization; P:positive regulation of protein exit from endoplasmic reticulum; C:endoplasmic reticulum exit site	K07953	SAR1; GTP-binding protein SAR1 [EC:3.6.5.-]	A 9120 Genetic Information Processing; B 09123 Folding, sorting and degradation; C 04141 Protein processing in endoplasmic reticulum [PATH:ko04141]|A 9160 Human Diseases; B 09171 Infectious disease: bacterial; C 05134 Legionellosis [PATH:ko05134]	934.52	-0.326096	0.293117	-1.11251	0.265918	0.372907	934.52	-0.687954	0.292861	-2.34908	0.0188198	0.0366557	934.52	-0.205612	0.293188	-0.701298	0.483117	0.611336	462.03	796.9	615.4	753.7	1280.48	953.32	1076.11	1624.26	1138.8	861.28	1166.96	785.85
Am_Rn_003558	F:GO:0005199; C:GO:0005618; P:GO:0009664; P:GO:0042546	F:structural constituent of cell wall; C:cell wall; P:plant-type cell wall organization; P:cell wall biogenesis	.	.	.	321.812	1.75589	1.65907	1.05836	0.289893	0.400867	321.812	-2.89247	1.65348	-1.74932	0.0802354	0.130562	321.812	-1.37544	1.6539	-0.831636	0.405615	0.535615	85.85	168.28	34.92	0	46.48	66.94	0	1260.8	1647.29	210.4	511.78	243.67
Am_Rn_003562	F:GO:0003746; F:GO:0003924; F:GO:0005525; C:GO:0005840; P:GO:0006448; F:GO:0046872	F:translation elongation factor activity; F:GTPase activity; F:GTP binding; C:ribosome; P:regulation of translational elongation; F:metal ion binding	K14416	HBS1; elongation factor 1 alpha-like protein	A 9120 Genetic Information Processing; B 09122 Translation; C 03015 mRNA surveillance pathway [PATH:ko03015]|A 9160 Human Diseases; B 09171 Infectious disease: bacterial; C 05134 Legionellosis [PATH:ko05134]	301.791	0.38409	0.382297	1.00469	0.315046	0.428407	301.791	0.702743	0.38305	1.8346	0.0665648	0.110907	301.791	0.31632	0.382094	0.827859	0.40775	0.537829	226.23	298.37	421.03	310.43	307.95	313.49	122.16	300.98	347.39	223.28	328.69	454.42
Am_Rn_074709	C:GO:0005886; P:GO:0009877; F:GO:0017110; F:GO:0043273	C:plasma membrane; P:nodulation; F:nucleoside diphosphate phosphatase activity; F:CTPase activity	K14641	APY; apyrase [EC:3.6.1.5]	A 9100 Metabolism; B 09104 Nucleotide metabolism; C 00230 Purine metabolism [PATH:ko00230]|A 9100 Metabolism; B 09104 Nucleotide metabolism; C 00240 Pyrimidine metabolism [PATH:ko00240]	475.182	-9.35377	2.07677	-4.50401	6.66832e-06	2.82875e-05	475.182	-12.6108	2.0758	-6.07512	1.23894e-09	1.06236e-08	475.182	-10.6724	2.07611	-5.14059	2.73874e-07	2.13772e-06	0	0	0	0	421.15	28.25	972.86	1543.23	2038.56	53.92	1037.78	87.7
Am_Rn_081582	.	.	K08770	UBC; ubiquitin C	A 9120 Genetic Information Processing; B 09123 Folding, sorting and degradation; C 04120 Ubiquitin mediated proteolysis [PATH:ko04120]|A 9140 Cellular Processes; B 09141 Transport and catabolism; C 04137 Mitophagy - animal [PATH:ko04137]|A 9150 Organismal Systems; B 09152 Endocrine system; C 03320 PPAR signaling pathway [PATH:ko03320]|A 9160 Human Diseases; B 09172 Infectious disease: viral; C 05…	14.4326	8.39239	3.38663	2.4781	0.0132086	0.0281145	14.4326	8.38351	3.38663	2.47547	0.013306	0.0269844	14.4326	8.42447	3.38663	2.48757	0.0128621	0.030415	6	79	65	0	0	0	0	0	0	0	0	0
Am_Rn_091340	P:GO:0030001; F:GO:0046872	P:metal ion transport; F:metal ion binding	.	.	.	159.204	-9.92048	1.28732	-7.7063	1.29514e-14	1.85945e-13	159.204	-8.2749	1.28984	-6.41545	1.4041e-10	1.40359e-09	159.204	-10.6279	1.28685	-8.25887	1.47059e-16	5.40521e-15	0	0	0	143.92	287.48	266.5	94.93	61.07	57.68	207.51	374.57	582.88
Am_Rn_029896	F:GO:0004675; F:GO:0005524; C:GO:0005886; P:GO:0006468; P:GO:0007178; P:GO:0009069; F:GO:0016787	F:transmembrane receptor protein serine/threonine kinase activity; F:ATP binding; C:plasma membrane; P:protein phosphorylation; P:transmembrane receptor protein serine/threonine kinase signaling pathway; P:serine family amino acid metabolic process; F:hydrolase activity	.	.	.	229.847	-0.364068	0.306965	-1.18602	0.235613	0.337306	229.847	-0.690367	0.306055	-2.2557	0.0240896	0.0455443	229.847	-0.370449	0.306831	-1.20734	0.227302	0.339325	132.32	167.17	141.7	170.71	284.59	279.75	276.57	291.29	346.6	150.93	282.6	320.98
Am_Rn_145623	F:GO:0003735; C:GO:0005840; P:GO:0006412; F:GO:0008270; P:GO:0042254	F:structural constituent of ribosome; C:ribosome; P:translation; F:zinc ion binding; P:ribosome biogenesis	K02980	RP-S29e, RPS29; small subunit ribosomal protein S29e	A 9120 Genetic Information Processing; B 09122 Translation; C 03010 Ribosome [PATH:ko03010]|A 9160 Human Diseases; B 09172 Infectious disease: viral; C 05171 Coronavirus disease - COVID-19 [PATH:ko05171]	14.4075	8.38971	3.16052	2.65454	0.00794169	0.017864	14.4075	8.38083	3.16052	2.65173	0.00800812	0.0172129	14.4075	8.42179	3.16052	2.66469	0.007706	0.0195395	29	33	81	0	0	0	0	0	0	0	0	0
Am_Rn_003596	C:GO:0005667; P:GO:0006357; P:GO:0010628; C:GO:0016021; C:GO:0016592	C:transcription regulator complex; P:regulation of transcription by RNA polymerase II; P:positive regulation of gene expression; C:integral component of membrane; C:mediator complex	K15166	MED23; mediator of RNA polymerase II transcription subunit 23	None	1056.63	-0.0792951	0.248231	-0.31944	0.749393	0.838064	1056.63	0.270642	0.248569	1.0888	0.276242	0.373841	1056.63	-0.204078	0.248106	-0.822542	0.410769	0.540787	919.52	1020.18	656.68	1104.19	1131.19	1330.18	559.3	1083.97	1199.63	1113.88	1351.8	1503.21
Am_Rn_003605	C:GO:0005768; C:GO:0005802; C:GO:0016021; P:GO:0072657	C:endosome; C:trans-Golgi network; C:integral component of membrane; P:protein localization to membrane	K17087	TM9SF3; transmembrane 9 superfamily member 3	None	410.873	-0.364045	0.338271	-1.07619	0.281841	0.391383	410.873	0.330328	0.3395	0.972983	0.330562	0.43459	410.873	-0.275057	0.338344	-0.812951	0.416246	0.545938	357.39	439.64	157.26	454.31	485.34	660.09	238.52	363.16	384.55	455.64	486.24	583.2
Am_Rn_078314	P:GO:0009416; C:GO:0009522; C:GO:0009523; C:GO:0009535; P:GO:0009768; C:GO:0016021; F:GO:0016168; P:GO:0018298	P:response to light stimulus; C:photosystem I; C:photosystem II; C:chloroplast thylakoid membrane; P:photosynthesis, light harvesting in photosystem I; C:integral component of membrane; F:chlorophyll binding; P:obsolete protein-chromophore linkage	K08907	LHCA1; light-harvesting complex I chlorophyll a/b binding protein 1	A 9100 Metabolism; B 09102 Energy metabolism; C 00196 Photosynthesis - antenna proteins [PATH:ko00196]	3014.07	-11.6096	0.782244	-14.8414	7.91171e-50	1.45409e-47	3014.07	-11.4755	0.782252	-14.6698	1.00691e-48	4.15134e-46	3014.07	-10.6127	0.782322	-13.5657	6.39816e-42	2.63983e-39	0	3	1	2999.9	5980.54	7356.79	4745.47	4731.53	5004.86	2683.83	2810.55	2726.34
Am_Rn_011216	F:GO:0004565; C:GO:0005618; C:GO:0005773; P:GO:0006012; P:GO:0006027; P:GO:0006687; C:GO:0009341; F:GO:0030246; P:GO:0046486	F:beta-galactosidase activity; C:cell wall; C:vacuole; P:galactose metabolic process; P:glycosaminoglycan catabolic process; P:glycosphingolipid metabolic process; C:beta-galactosidase complex; F:carbohydrate binding; P:glycerolipid metabolic process	.	.	.	439.708	-11.1588	3.88241	-2.8742	0.00405051	0.0098116	439.708	-11.9878	3.88233	-3.08777	0.00201661	0.00505462	439.708	-10.6022	3.88248	-2.73079	0.00631825	0.0164785	0	0	0	473.56	0	1266.07	349.64	0	2761.33	47.21	0	1124.61
Am_Rn_082764	.	.	.	.	.	16.2542	8.38089	2.1008	3.98938	6.62475e-05	0.000235126	16.2542	2.88701	1.76365	1.63695	0.10164	0.160313	16.2542	8.41296	2.1008	4.00464	6.21112e-05	0.000281262	2	98	51	0	0	0	15	5	3	0	0	0
Am_Rn_038526	F:GO:0004176; F:GO:0004222; F:GO:0005524; P:GO:0006508; P:GO:0006510; F:GO:0008270; C:GO:0009535; C:GO:0009941; P:GO:0010027; P:GO:0010205; P:GO:0010206; P:GO:0010304; C:GO:0016021	F:ATP-dependent peptidase activity; F:metalloendopeptidase activity; F:ATP binding; P:proteolysis; P:obsolete ATP-dependent proteolysis; F:zinc ion binding; C:chloroplast thylakoid membrane; C:chloroplast envelope; P:thylakoid membrane organization; P:photoinhibition; P:photosystem II repair; P:PSII associated light-harvesting complex II catabolic process; C:integral component of membrane	K03798	ftsH, hflB; cell division protease FtsH [EC:3.4.24.-]	None	257.387	-11.5204	1.59582	-7.21913	5.23204e-13	6.19179e-12	257.387	-7.10247	1.60221	-4.43292	9.2965e-06	3.91156e-05	257.387	-10.5994	1.59608	-6.64086	3.11866e-11	5.067e-10	0	0	0	664.89	1106.51	254.45	17.11	65.06	17.04	83.54	943.89	94.33
Am_Rn_009094	F:GO:0004601; F:GO:0005509; C:GO:0005886; P:GO:0006804; P:GO:0006979; C:GO:0016021; F:GO:0016174; P:GO:0098869	F:peroxidase activity; F:calcium ion binding; C:plasma membrane; P:obsolete peroxidase reaction; P:response to oxidative stress; C:integral component of membrane; F:NAD(P)H oxidase H2O2-forming activity; P:cellular oxidant detoxification	K13447	RBOH; respiratory burst oxidase [EC:1.6.3.- 1.11.1.-]	A 9130 Environmental Information Processing; B 09132 Signal transduction; C 04016 MAPK signaling pathway - plant [PATH:ko04016]|A 9150 Organismal Systems; B 09159 Environmental adaptation; C 04626 Plant-pathogen interaction [PATH:ko04626]	104.446	-8.08103	1.46589	-5.51273	3.53317e-08	2.15759e-07	104.446	-5.94922	1.4784	-4.0241	5.71943e-05	0.000204349	104.446	-10.5936	1.46283	-7.24181	4.42728e-13	9.78075e-12	0	0	0	56.88	94.62	36.55	3.64	4.09	39.29	374.74	459.49	290.88
Am_Rn_098000	F:GO:0003735; C:GO:0005840; P:GO:0006412; P:GO:0042254	F:structural constituent of ribosome; C:ribosome; P:translation; P:ribosome biogenesis	K02949	RP-S11e, RPS11; small subunit ribosomal protein S11e	A 9120 Genetic Information Processing; B 09122 Translation; C 03010 Ribosome [PATH:ko03010]|A 9160 Human Diseases; B 09172 Infectious disease: viral; C 05171 Coronavirus disease - COVID-19 [PATH:ko05171]	14.3523	8.37512	3.03987	2.75509	0.00586756	0.013636	14.3523	7.40445	3.03987	2.43578	0.0148598	0.0297441	14.3523	8.4072	3.03987	2.76564	0.00568106	0.0150403	2	8	132	0	0	0	1	0	0	0	0	0
Am_Rn_106350	F:GO:0003735; C:GO:0005840; P:GO:0006412; P:GO:0042254	F:structural constituent of ribosome; C:ribosome; P:translation; P:ribosome biogenesis	K02877	RP-L15e, RPL15; large subunit ribosomal protein L15e	A 9120 Genetic Information Processing; B 09122 Translation; C 03010 Ribosome [PATH:ko03010]|A 9160 Human Diseases; B 09172 Infectious disease: viral; C 05171 Coronavirus disease - COVID-19 [PATH:ko05171]	14.1667	8.36541	3.16194	2.64565	0.00815331	0.0182904	14.1667	8.35652	3.16194	2.64284	0.00822128	0.0176239	14.1667	8.39748	3.16194	2.6558	0.00791209	0.0199946	28	36	77	0	0	0	0	0	0	0	0	0
Am_Rn_003655	F:GO:0005085; P:GO:0043087	F:guanyl-nucleotide exchange factor activity; P:regulation of GTPase activity	.	.	.	362.962	0.0679786	0.417236	0.162926	0.870577	0.933845	362.962	0.579838	0.418322	1.3861	0.165715	0.243677	362.962	-0.844672	0.416037	-2.03028	0.042328	0.0838942	111.78	504.34	233.92	272.93	367	370.46	184.97	278.74	244.2	552.43	725.18	662.05
Am_Rn_003657	C:GO:0005886; F:GO:0015276; C:GO:0016021; P:GO:0034220	C:plasma membrane; F:ligand-gated ion channel activity; C:integral component of membrane; P:ion transmembrane transport	.	.	.	936.419	-0.0610704	0.134189	-0.455108	0.649031	0.750163	936.419	0.190706	0.134664	1.41616	0.156728	0.232501	936.419	0.12507	0.13445	0.930233	0.35225	0.480302	746.22	859.06	820.06	993.93	1174.09	1097.06	737.13	928.22	1094.52	891.23	931.53	1122.52
Am_Rn_070347	F:GO:0003680; F:GO:0003700; C:GO:0005634; C:GO:0005667; P:GO:0006355; P:GO:0006355	F:minor groove of adenine-thymine-rich DNA binding; F:DNA-binding transcription factor activity; C:nucleus; C:transcription regulator complex; P:regulation of DNA-templated transcription; P:regulation of DNA-templated transcription	.	.	.	27.6565	9.32682	1.80917	5.1553	2.53227e-07	1.3616e-06	27.6565	9.31794	1.80917	5.15039	2.5995e-07	1.47495e-06	27.6565	8.3971	1.80917	4.64141	3.46047e-06	2.12563e-05	42.75	105	131.39	0	0	0	0	0	0	0	1	0
Am_Rn_003684	C:GO:0016020	C:membrane	.	.	.	351.248	0.893447	0.770929	1.15892	0.246488	0.35031	351.248	0.124129	0.770126	0.16118	0.871952	0.912853	351.248	-0.0999733	0.769926	-0.129848	0.896687	0.952171	205.9	292.92	495.11	57.55	209.64	455	82.8	467.68	689.4	274.09	364.09	779.23
Am_Rn_043736	.	.	.	.	.	390.677	-0.282438	0.270289	-1.04495	0.296047	0.407695	390.677	-0.691235	0.269508	-2.5648	0.0103235	0.021574	390.677	-0.37734	0.270008	-1.39751	0.162259	0.257583	136	358	280	338	399	460	488	555	526	432	403	466
Am_Rn_003692	P:GO:0032012	P:regulation of ARF protein signal transduction	K18443	GBF1; golgi-specific brefeldin A-resistance guanine nucleotide exchange factor 1	A 9140 Cellular Processes; B 09141 Transport and catabolism; C 04144 Endocytosis [PATH:ko04144]	275.817	-0.57129	0.408051	-1.40005	0.1615	0.246767	275.817	-0.458767	0.408279	-1.12366	0.261157	0.356693	275.817	-0.420246	0.40826	-1.02936	0.303312	0.426702	155.53	199.18	173.86	258.17	365.5	396.1	110.12	409.8	454.35	279.29	278.22	378.75
Am_Rn_132233	F:GO:0003735; C:GO:0005840; P:GO:0006412; P:GO:0042254	F:structural constituent of ribosome; C:ribosome; P:translation; P:ribosome biogenesis	K02917	RP-L35Ae, RPL35A; large subunit ribosomal protein L35Ae	A 9120 Genetic Information Processing; B 09122 Translation; C 03010 Ribosome [PATH:ko03010]|A 9160 Human Diseases; B 09172 Infectious disease: viral; C 05171 Coronavirus disease - COVID-19 [PATH:ko05171]	14.1466	8.36337	3.1646	2.64279	0.00822268	0.0184297	14.1466	8.35449	3.1646	2.63998	0.00829112	0.0177574	14.1466	8.39545	3.1646	2.65292	0.00797983	0.0201345	27	37	77	0	0	0	0	0	0	0	0	0
Am_Rn_102346	C:GO:0005840	C:ribosome	.	.	.	14.0016	8.34845	3.11388	2.68104	0.00733933	0.0166418	14.0016	8.33956	3.11388	2.67819	0.00740215	0.0160563	14.0016	8.38052	3.11388	2.69134	0.00711651	0.0182517	42	37	59	0	0	0	0	0	0	0	0	0
Am_Rn_089884	.	.	.	.	.	51.2895	10.2175	2.02042	5.05714	4.25596e-07	2.1989e-06	51.2895	10.2087	2.02042	5.05274	4.35517e-07	2.35881e-06	51.2895	8.37624	1.92977	4.34054	1.42131e-05	7.52227e-05	63	395	80	0	0	0	0	0	0	2	0	0
Am_Rn_054114	P:GO:0006520; F:GO:0016847; F:GO:0030170; P:GO:0042218	P:cellular amino acid metabolic process; F:1-aminocyclopropane-1-carboxylate synthase activity; F:pyridoxal phosphate binding; P:1-aminocyclopropane-1-carboxylate biosynthetic process	K20772	ACS1_2_6; 1-aminocyclopropane-1-carboxylate synthase 1/2/6 [EC:4.4.1.14]	A 9100 Metabolism; B 09105 Amino acid metabolism; C 00270 Cysteine and methionine metabolism [PATH:ko00270]|A 9130 Environmental Information Processing; B 09132 Signal transduction; C 04016 MAPK signaling pathway - plant [PATH:ko04016]	179.162	7.24921	1.02365	7.08174	1.42356e-12	1.59792e-11	179.162	2.45073	0.943163	2.59842	0.00936551	0.0197862	179.162	8.37599	1.1108	7.54047	4.68269e-14	1.19386e-12	67	387	1066	3	3	7	33	149	188	0	2	4
Am_Rn_058325	.	.	.	.	.	28.3401	9.30392	1.47973	6.2876	3.22406e-10	2.63566e-09	28.3401	4.63367	0.975416	4.75045	2.02965e-06	9.7179e-06	28.3401	8.3742	1.47973	5.6593	1.51995e-08	1.53219e-07	142.8	67.81	50	0	0	0	5.08	2.08	7	0	1.09	0
Am_Rn_003706	P:GO:0000245; F:GO:0003729; C:GO:0016021	P:spliceosomal complex assembly; F:mRNA binding; C:integral component of membrane	K12828	SF3B1, SAP155; splicing factor 3B subunit 1	A 9120 Genetic Information Processing; B 09121 Transcription; C 03040 Spliceosome [PATH:ko03040]	561.583	-0.418611	0.25477	-1.64309	0.100363	0.165076	561.583	-0.0783417	0.255305	-0.306855	0.758954	0.821319	561.583	-0.227167	0.25499	-0.890884	0.372992	0.502456	465.46	425.18	323.07	857.82	605.85	629.81	411.16	622.79	649.21	574.22	686.97	630.79
Am_Rn_003710	C:GO:0005737	C:cytoplasm	K03255	TIF31, CLU1; protein TIF31	None	2617.31	-5.01201	0.923629	-5.42643	NA	NA	2617.31	-3.75584	0.923727	-4.06596	NA	NA	2617.31	-4.32869	0.923669	-4.68641	NA	NA	25.69	378.63	15.73	5741.88	4901.64	5549.04	557.22	3145.15	3421.9	2673.36	2824.3	4902.94
Am_Rn_003720	.	.	.	.	.	243.362	0.199953	0.298347	0.670201	0.502729	0.618309	243.362	0.291027	0.298688	0.974352	0.329882	0.433959	243.362	0.154784	0.298096	0.519243	0.603591	0.720933	273.79	200.96	188.56	184.6	286.41	292.19	257.27	227.73	213.8	224.56	293.16	283.28
Am_Rn_003724	.	.	.	.	.	424.813	0.699836	0.558046	1.25408	0.209812	0.306261	424.813	0.0802955	0.557263	0.144089	0.88543	0.923763	424.813	-0.614587	0.55666	-1.10406	0.269566	0.389036	189	446	417	93	359	386	191	526	585	430	796	871
Am_Rn_103629	.	.	.	.	.	169.886	-4.71553	1.40123	-3.36529	0.000764633	0.00217858	169.886	-10.6039	1.36175	-7.787	6.86189e-15	1.27964e-13	169.886	-10.5224	1.36176	-7.72707	1.10051e-14	3.06156e-13	0	0	0	0	11	8	466	290	321	455	242	378
Am_Rn_129590	F:GO:0003735; C:GO:0005840; P:GO:0006412; P:GO:0042254	F:structural constituent of ribosome; C:ribosome; P:translation; P:ribosome biogenesis	K02971	RP-S21e, RPS21; small subunit ribosomal protein S21e	A 9120 Genetic Information Processing; B 09122 Translation; C 03010 Ribosome [PATH:ko03010]|A 9160 Human Diseases; B 09172 Infectious disease: viral; C 05171 Coronavirus disease - COVID-19 [PATH:ko05171]	13.9309	8.34118	3.1159	2.67697	0.00742905	0.0168215	13.9309	8.33229	3.1159	2.67412	0.00749252	0.0162316	13.9309	8.37325	3.1159	2.68727	0.00720393	0.0184404	38	40	60	0	0	0	0	0	0	0	0	0
Am_Rn_014403	F:GO:0004499; F:GO:0050660; F:GO:0050661	F:N,N-dimethylaniline monooxygenase activity; F:flavin adenine dinucleotide binding; F:NADP binding	K00485	FMO; dimethylaniline monooxygenase (N-oxide forming) [EC:1.14.13.8]	A 9100 Metabolism; B 09111 Xenobiotics biodegradation and metabolism; C 00982 Drug metabolism - cytochrome P450 [PATH:ko00982]	1415.02	-5.54583	0.962831	-5.75992	8.41532e-09	5.64394e-08	1415.02	-3.93033	0.966897	-4.06489	4.80559e-05	0.000174829	1415.02	-10.5164	0.960939	-10.9438	7.1116e-28	9.30032e-26	6	3.36	0	283.55	162.3	92.75	14	128.9	44.48	2409.95	6282.53	9297.05
Am_Rn_133306	.	.	.	.	.	14.3852	5.17008	1.31116	3.94313	8.0426e-05	0.000280681	14.3852	7.3689	1.63927	4.49523	6.94939e-06	2.99674e-05	14.3852	8.37165	1.63927	5.10694	3.27416e-07	2.50754e-06	14	37	89	1	2	2	1	0	0	0	0	0
Am_Rn_003747	P:GO:0006486; C:GO:0016021; F:GO:0016757	P:protein glycosylation; C:integral component of membrane; F:glycosyltransferase activity	K20888	MUR3; xyloglucan galactosyltransferase MUR3 [EC:2.4.1.-]	None	840.351	-0.915816	0.509585	-1.79718	0.0723071	0.124546	840.351	-0.362246	0.509835	-0.710517	0.477384	0.582044	840.351	0.0128551	0.51003	0.0252046	0.979892	1	143	793	738	1489	997	1468	735	916	1046	989	530	593
Am_Rn_003750	.	.	.	.	.	399.799	0.329814	0.299675	1.10057	0.271083	0.379154	399.799	0.357711	0.299755	1.19334	0.232734	0.324046	399.799	0.374125	0.299691	1.24837	0.211897	0.32045	448.52	396.84	329.94	418.99	387.12	411.64	204.71	457.72	567.66	404.28	408.74	397.11
Am_Rn_003759	P:GO:0000724; C:GO:0005634; P:GO:0006334; P:GO:0009555; P:GO:0009825; P:GO:0009934; P:GO:0010026; P:GO:0031507; C:GO:0033186; P:GO:0045787; P:GO:0048366; P:GO:0051301	P:double-strand break repair via homologous recombination; C:nucleus; P:nucleosome assembly; P:pollen development; P:multidimensional cell growth; P:regulation of meristem structural organization; P:trichome differentiation; P:heterochromatin formation; C:CAF-1 complex; P:positive regulation of cell cycle; P:leaf development; P:cell division	K10750	CHAF1A; chromatin assembly factor 1 subunit A	None	337.105	0.15925	0.718319	0.221698	0.824549	0.898082	337.105	1.04026	0.719322	1.44617	0.148129	0.221532	337.105	0.428717	0.718524	0.596664	0.550732	0.673579	564.92	226.17	242.35	339.39	326.21	601.89	52.84	215.47	445.66	142.81	303.85	619
Am_Rn_003766	F:GO:0016491	F:oxidoreductase activity	K00454	LOX2S; lipoxygenase [EC:1.13.11.12]	A 9100 Metabolism; B 09103 Lipid metabolism; C 00591 Linoleic acid metabolism [PATH:ko00591]|A 9100 Metabolism; B 09103 Lipid metabolism; C 00592 alpha-Linolenic acid metabolism [PATH:ko00592]	455.181	0.384144	0.284466	1.3504	0.176886	0.265949	455.181	0.0772324	0.283945	0.271997	0.785624	0.843163	455.181	0.467097	0.284559	1.64148	0.100699	0.174136	570	415	309	334	491	483	452	568	593	372	467	419
Am_Rn_008461	.	.	K20241	WDR44, RAB11BP; WD repeat-containing protein 44	None	393.422	0.55535	0.287281	1.93313	0.0532206	0.0956078	393.422	-0.691942	0.284518	-2.43198	0.0150164	0.0300199	393.422	-0.299065	0.285071	-1.04909	0.294136	0.416796	366.16	266.5	217.96	197.55	243.99	327.4	548.6	547.43	702.51	416.26	401.78	592.08
Am_Rn_023377	P:GO:0006633; F:GO:0016702; P:GO:0031408; F:GO:0046872	P:fatty acid biosynthetic process; F:oxidoreductase activity, acting on single donors with incorporation of molecular oxygen, incorporation of two atoms of oxygen; P:oxylipin biosynthetic process; F:metal ion binding	K15718	LOX1_5; linoleate 9S-lipoxygenase [EC:1.13.11.58]	A 9100 Metabolism; B 09103 Lipid metabolism; C 00591 Linoleic acid metabolism [PATH:ko00591]	40660.7	-8.82794	0.960903	-9.18713	4.03459e-20	1.02919e-18	40660.7	-11.638	0.960883	-12.1118	9.15136e-34	1.21921e-31	40660.7	-10.507	0.960886	-10.9347	7.86853e-28	1.01991e-25	50.65	20.86	4	17831.3	22077.2	4866.52	69301.8	119953	143476	10793.7	118406	22126.9
Am_Rn_090734	.	.	K00059	fabG, OAR1; 3-oxoacyl-[acyl-carrier protein] reductase [EC:1.1.1.100]	A 9100 Metabolism; B 09103 Lipid metabolism; C 00061 Fatty acid biosynthesis [PATH:ko00061]|A 9100 Metabolism; B 09108 Metabolism of cofactors and vitamins; C 00780 Biotin metabolism [PATH:ko00780]|A 9100 Metabolism; B 09110 Biosynthesis of other secondary metabolites; C 00333 Prodigiosin biosynthesis [PATH:ko00333]	13.8122	7.35842	3.00166	2.45145	0.0142281	0.0300321	13.8122	8.31133	3.00166	2.76891	0.00562437	0.0125724	13.8122	8.35229	3.00166	2.78256	0.00539321	0.0143652	2	11	124	1	0	0	0	0	0	0	0	0
Am_Rn_079959	F:GO:0005506; C:GO:0005737; P:GO:0019310; F:GO:0050113	F:iron ion binding; C:cytoplasm; P:inositol catabolic process; F:inositol oxygenase activity	K00469	MIOX; inositol oxygenase [EC:1.13.99.1]	A 9100 Metabolism; B 09101 Carbohydrate metabolism; C 00053 Ascorbate and aldarate metabolism [PATH:ko00053]|A 9100 Metabolism; B 09101 Carbohydrate metabolism; C 00562 Inositol phosphate metabolism [PATH:ko00562]	55.8951	9.27056	2.32879	3.98085	6.86686e-05	0.000243012	55.8951	-0.142539	2.0103	-0.0709043	0.943474	0.966778	55.8951	8.34084	2.32879	3.58162	0.000341466	0.00127231	0	72.93	197.25	0	0	0	266.93	19.15	53.29	1	0	0
Am_Rn_003784	F:GO:0003677; F:GO:0003723; F:GO:0004525; F:GO:0005524; P:GO:0006396; P:GO:0031047; P:GO:0051252; P:GO:0090502	F:DNA binding; F:RNA binding; F:ribonuclease III activity; F:ATP binding; P:RNA processing; P:gene silencing by RNA; P:regulation of RNA metabolic process; P:RNA phosphodiester bond hydrolysis, endonucleolytic	K11592	DICER1, DCR1; endoribonuclease Dicer [EC:3.1.26.-]	A 9160 Human Diseases; B 09161 Cancer: overview; C 05206 MicroRNAs in cancer [PATH:ko05206]	492.989	-1.0703	0.885723	-1.20839	NA	NA	492.989	-0.785027	0.885918	-0.886117	NA	NA	492.989	-2.24845	0.88524	-2.53993	NA	NA	21.64	506.57	27.06	427.18	525.71	427.17	225.61	429.13	509.91	1061.85	1026.6	1127.04
Am_Rn_059312	F:GO:0000234; P:GO:0006656; P:GO:0032259	F:phosphoethanolamine N-methyltransferase activity; P:phosphatidylcholine biosynthetic process; P:methylation	K05929	E2.1.1.103, NMT; phosphoethanolamine N-methyltransferase [EC:2.1.1.103]	A 9100 Metabolism; B 09103 Lipid metabolism; C 00564 Glycerophospholipid metabolism [PATH:ko00564]	137.787	-8.97746	1.68787	-5.31881	1.04451e-07	5.92762e-07	137.787	-9.02787	1.68783	-5.34881	8.8534e-08	5.49559e-07	137.787	-10.5024	1.68674	-6.22647	4.77069e-10	6.29232e-09	0	0	0	16	272.84	63	96	155	123	69	895.18	84.78
Am_Rn_003788	.	.	.	.	.	276.827	0.550834	0.537401	1.025	0.305365	0.41785	276.827	-0.443358	0.535573	-0.82782	0.407773	0.516214	276.827	-0.657951	0.53526	-1.22922	0.218991	0.329312	103.09	335.58	175.73	204.92	215.91	90.38	177.67	461.7	433.29	259.23	435	554.79
[truncated: 30,555 more rows]

## Sheet: Table S23
Supplementary Table 23. GO and KEGG annotation and analysis of DEGs (Set-3).
Unigene ID	GO information		KEGG information			DEG (Roots vs. Leaves)						DEG (Roots vs. Flowers)						DEG (Roots vs. Stems)						Read count
	GO ID	GO Name	KO	KO Description	Pathway Description	BaseMean	log2 FC	lfcSE	Stat	pvalue	padj	BaseMean	log2 FC	lfcSE	Stat	pvalue	padj	BaseMean	log2 FC	lfcSE	Stat	pvalue	padj	Roots-1	Roots-2	Roots-3	Leaves-1	Leaves-2	Leaves-3	Flowers-1	Flowers-2	Flowers-3	Stems-1	Stems-2	Stems-3
[truncated: 35,937 more rows]
